# Supplementary material for: Xenobiotic Metabolism and Gut Microbiomes
Source: PubMed Central journal article supplement (PMC5047465; doi:10.1371/journal.pone.0163099), 2016-10-03

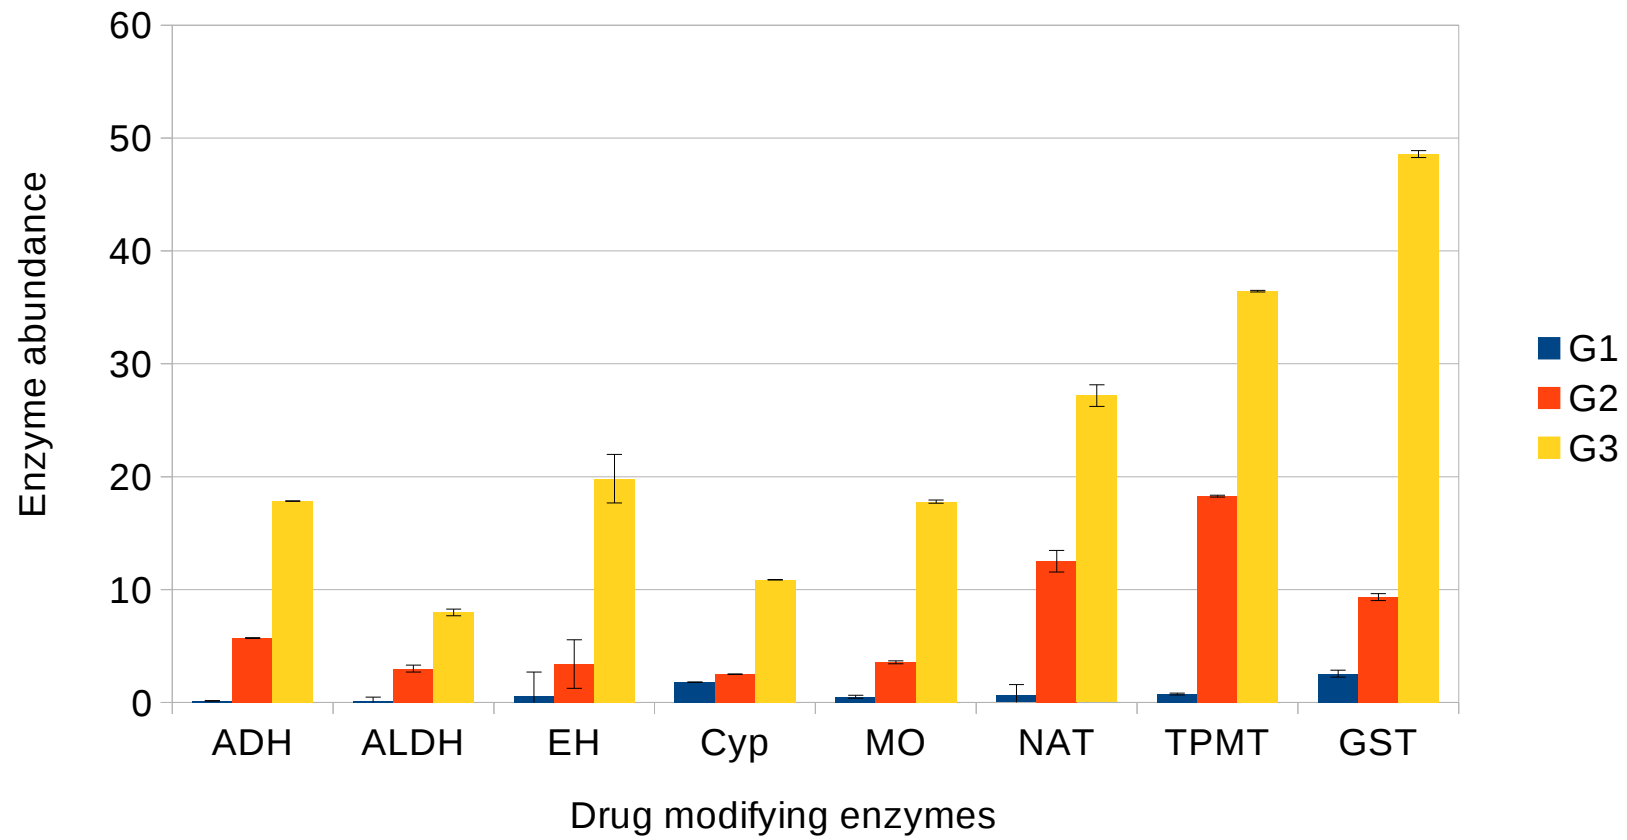

Supplement: pone.0163099.s001.pdf [file pone.0163099.s001.pdf]
