# Supplementary material for: Xenobiotic Metabolism and Gut Microbiomes
Source: PubMed Central journal article supplement (PMC5047465; doi:10.1371/journal.pone.0163099), 2016-10-03
Supplement: pone.0163099.s017.pdf [file pone.0163099.s017.pdf]

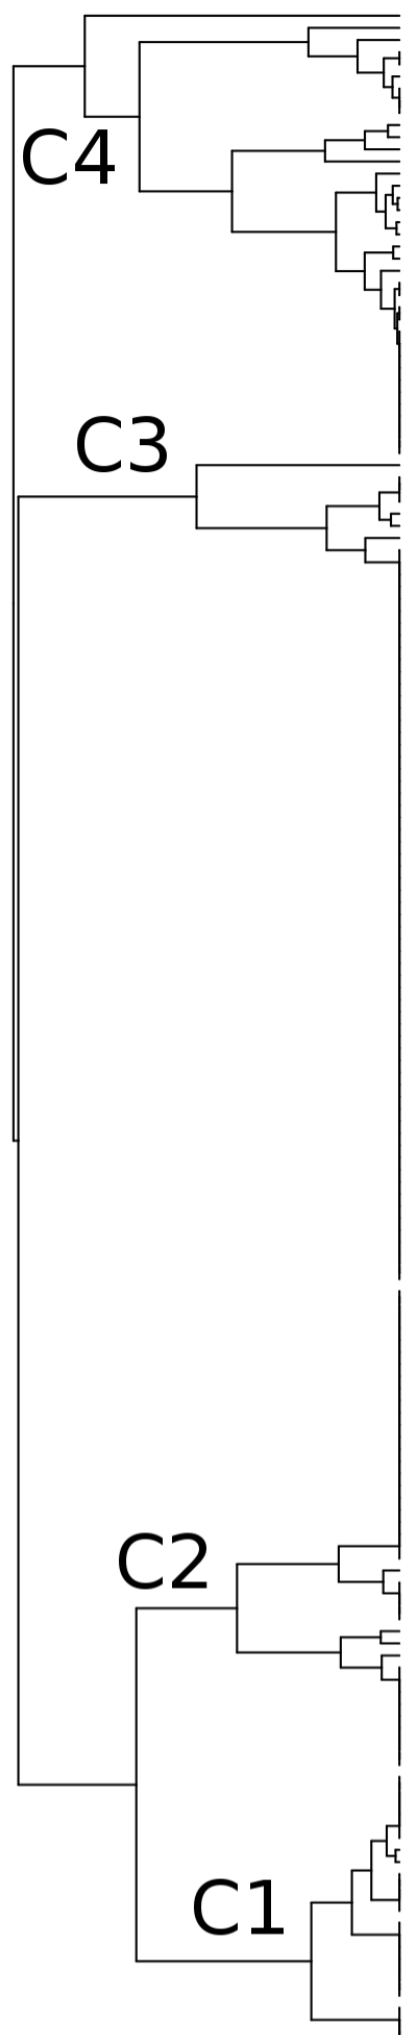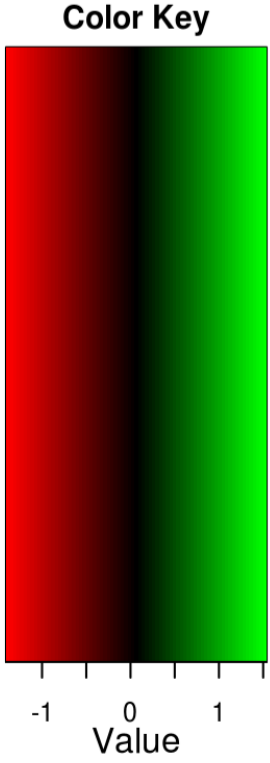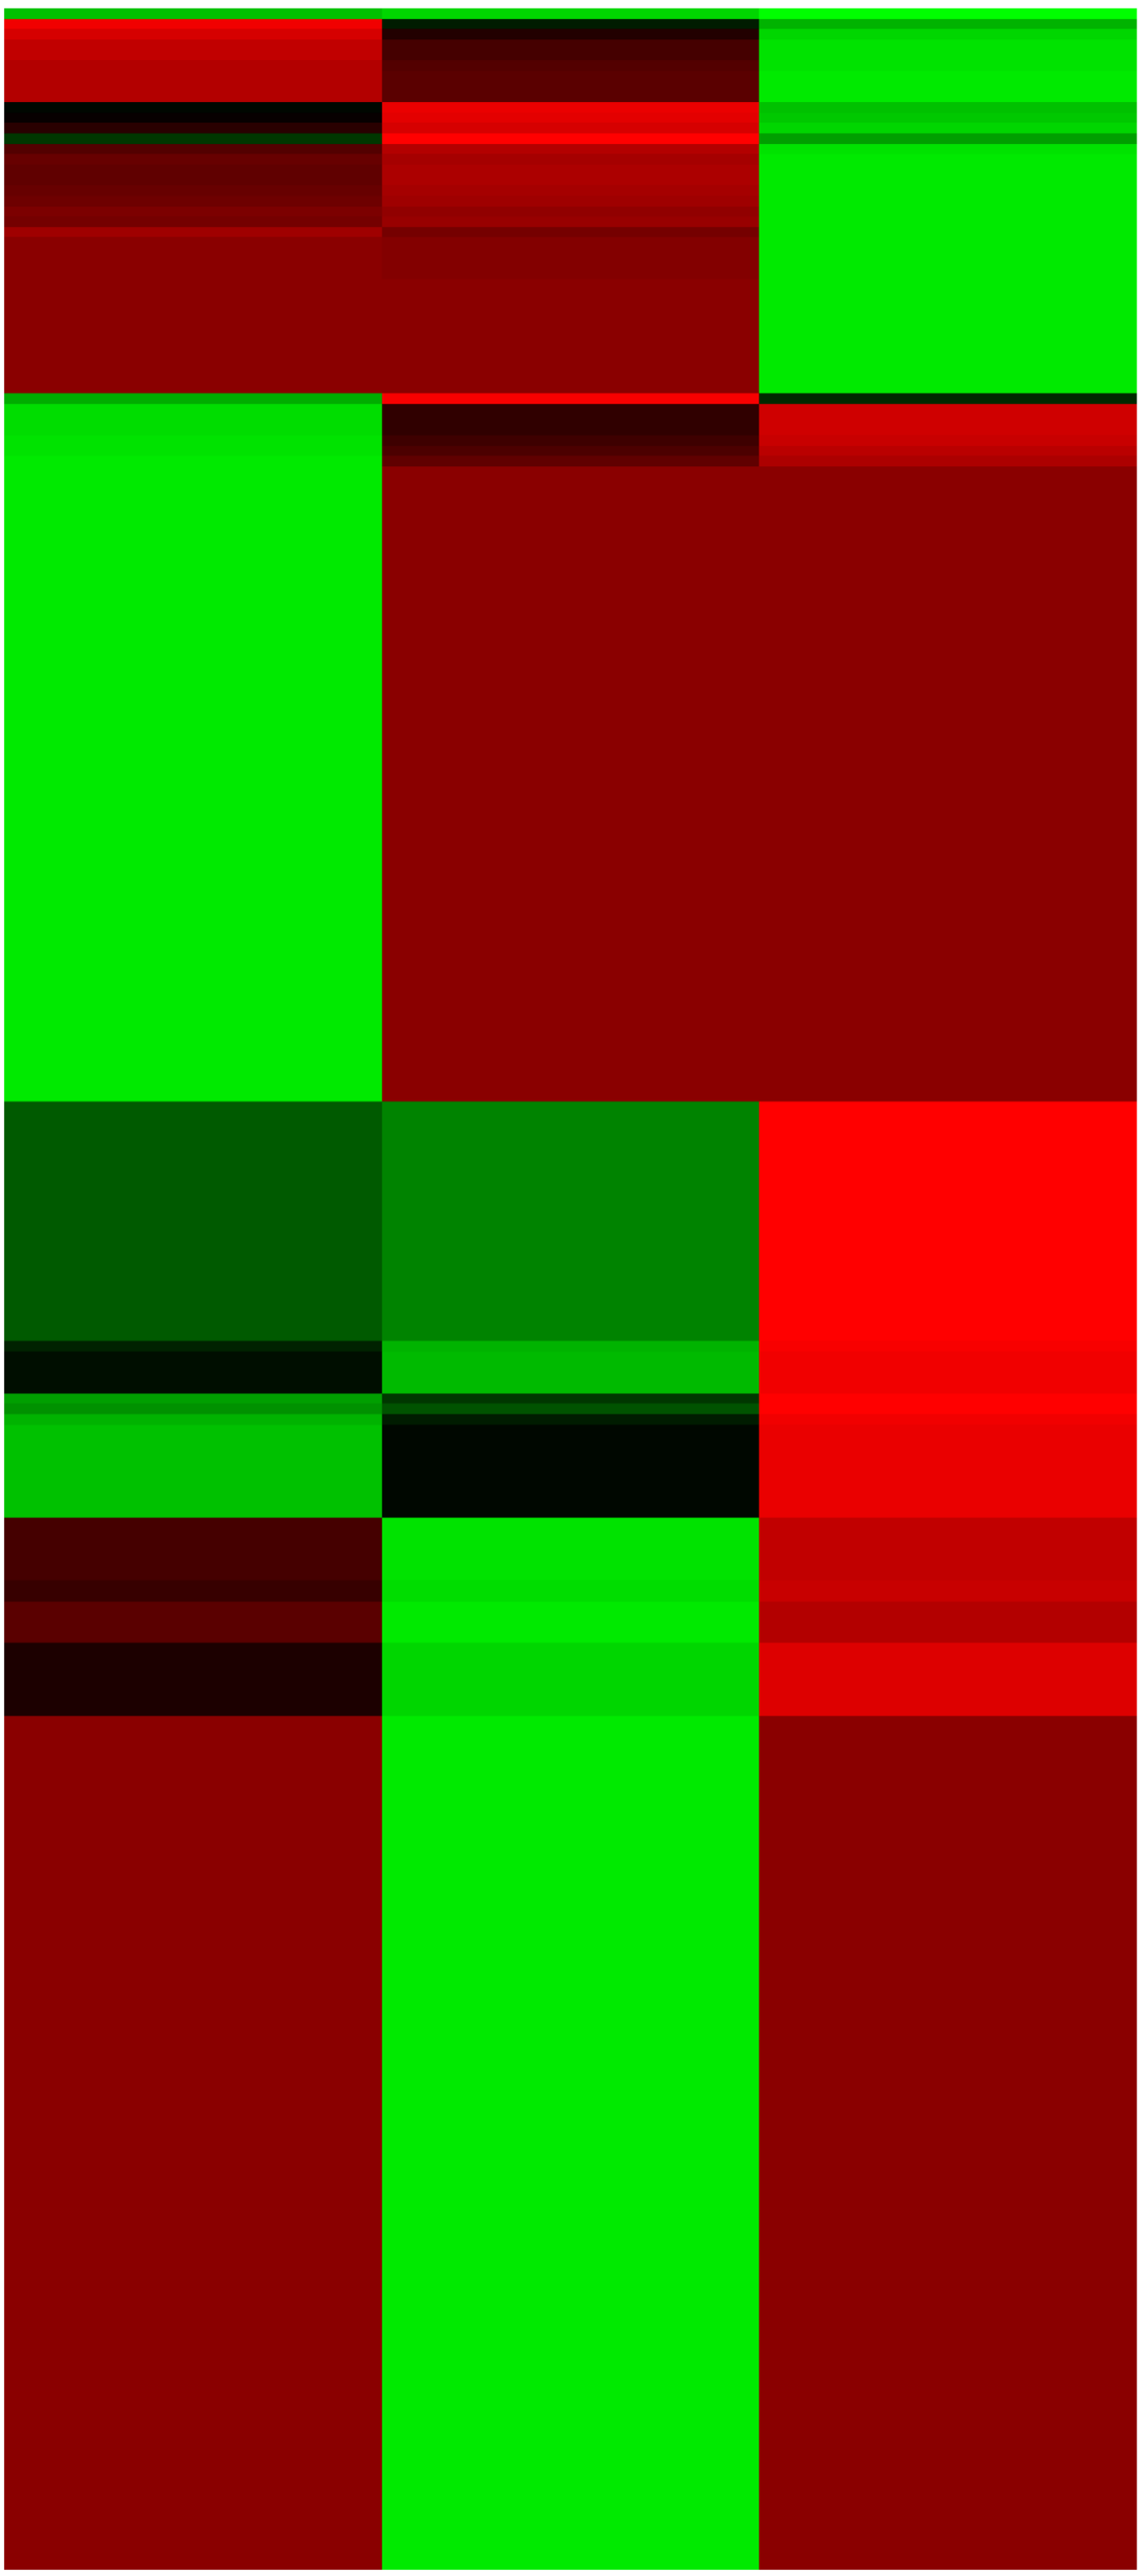

- Acetobacteraceae
- Xanthomonadaceae
- Sphingomonadaceae
- Moraxellaceae
- Desulfobacteraceae
- Pseudonocardaceae
- Sphingobacteriaceae
- Chloroflexaceae
- Caplobacteraceae
- Rhodocyclaceae
- Rhizobiaceae
- Phyllobacteriaceae
- Oceanospirillaceae
- Oxalobacteraceae
- Comamonadaceae
- Methylobacteriaceae
- Alcaligenaceae
- Burkholderiaceae
- Xanthobacteraceae
- Bradyrhizobiaceae
- Beijerinckiaceae
- Hyphomonadaceae
- Myxococcaceae
- Ruscobacteriaceae
- Pseudomonadaceae
- Micromonosporaceae
- Streptosporangiaceae
- Shewanellaceae
- Blubacteriaceae
- Polyangiaceae
- Mycobacteriaceae
- Herpetosiphonaceae
- Haemulaceae
- Frankiaceae
- Cystobacteraceae
- Chelatobacteraceae
- Catenulisporaceae
- Rhodobacteraceae
- Piscirickettsiaceae
- Chromatiaceae
- Rickettsiaceae
- Nostocaceae
- Fuminoococcaceae
- Verrucomicrobiaceae
- Thiotrichaceae
- Thermoproteaceae
- Thermoplasmataceae
- Thermofilaceae
- Thermodesulfobacteriaceae
- Thermococcaceae
- Theaceae
- Sulfolobaceae
- Spiriplasmataceae
- Simkaniaceae
- Scytonemataceae
- Hydrotaceae
- Rikenellaceae
- Pyrodictaceae
- Propionibacteriaceae
- Prevotellaceae
- Picrophilaceae
- Peptostreptococcaceae
- Pentatomidae
- Parachlamydiaceae
- Oscillospiraceae
- Orobanchaceae
- Opihostichaceae
- Nitrosopumiliaceae
- Mycoplasmataceae
- Moraxellaceae
- Microcystidae
- Microchaetaceae
- Methylocystaceae
- Methanothermaceae
- Methanospirillaceae
- Methanosarcinaceae
- Methanosarcinaceae
- Methanopyraceae
- Methanomicrobiaceae
- Methanocorpusculaceae
- Methanocaldococcaceae
- Methanobacteriaceae
- Mycoperdaceae
- Kneoporiaceae
- Halobacteriaceae
- Ferropilaceae
- Erysipelotrichaceae
- Entomoplasmataceae
- Desulfurococcaceae
- Dermabacteraceae
- Cyclobacteriaceae
- Curtibacteraceae
- Chlamydomonadaceae
- Chlamydiaceae
- Cenarchaeaceae
- Caricaceae
- Caldisphaeraceae
- Caldivaceae
- Brevibacteriaceae
- Bovidae
- Battabacteriaceae
- Aurantimonadaceae
- Asteraceae
- Archaeoglobaceae
- Actinosynnemataceae
- Actinomycetaceae
- Alteromonadaceae
- Clostridiales
- Cryomorphaceae
- Geobacteraceae
- Halobacteroidaceae
- Halomonadaceae
- Halobacteriaceae
- Lachnospiraceae
- Lactobacillaceae
- Legionellaceae
- Leptospiraceae
- Leucostocaceae
- Listeriaceae
- Nitrospiraceae
- Planococcaceae
- Promicromonosporaceae
- Saprosiraceae
- Streptomycetaceae
- Syntrophobacteriaceae
- Thermodesulfobaceae
- Thermomonosporaceae
- Exiguobacteriaceae
- Rhodospirillaceae
- Microbacteriaceae
- Rusobacteriaceae
- Bacillaceae
- Paenibacillaceae
- Vibrionaceae
- Rhodobacteriaceae
- Spirochaetaceae
- Neisseriaceae
- Methylococcaceae
- Intrasporangiaceae
- Geodermatophilaceae
- Eubacteriaceae
- Enterococcaceae
- Rhodobacteriaceae
- Anaplastaceae
- Desulfotubificaceae
- Derringeriaceae
- Exthiorhodospiraceae
- Methylotrichaceae
- Porphyromonadaceae
- Thermoanaerobacteraceae
- Peptococcaceae
- Enterobacteriaceae
- Chlorobiaceae
- Agullicaceae
- Micromonadaceae
- Thermotogaceae
- Syntrophaceae
- Pasteurellaceae
- Nocardiodaceae
- Nocardiopteridaceae
- Clostridiales
- Campylobacteraceae
- Aeromonadaceae
- Waddliaceae
- Vesicomylidae
- Verrucomicrobiaceae
- Nakamurellaceae
- Truiperaceae
- Thermomicrobiaceae
- Thermoanaerobacteriales
- Thermaceae
- Syntrophomonadaceae
- Streptococcaceae
- Staphylococcaceae
- Sphaerobacteriaceae
- Segniliparaceae
- Sanguibacteraceae
- Rhodothermaceae
- Punicococcaceae
- Psychromonadaceae
- Pseudococcidae
- Pseudoalteromonadaceae
- Proteidae
- Prochlorococcaceae
- Planctomycetaceae
- Peiobacteriaceae
- Parvularculaceae
- Opitutaceae
- Nocardiopteridaceae
- Nocardiopteridaceae
- Nitrosomonadaceae
- Nautillaceae
- Nitrososphaeraceae
- Nakamurellaceae
- Mantidaceae
- Mycobacteriaceae
- Jonesiaceae
- Jiomariaceae
- Hyphomicrobiaceae
- Hydrogenothermaceae
- Hydrogenophilaceae
- Halobacteriaceae
- Halothiobacillaceae
- Halangiaceae
- Halanaerobiaceae
- Glycomycetaceae
- Gemmatimonadaceae
- Gallionellaceae
- Francisellaceae
- Eubacteriaceae
- Eerrimonadaceae
- Erythrobacteriaceae
- Edwardsiidae
- Dictyoglomaceae
- Desulfurobacteriaceae
- Desulfurellaceae
- Desulfovibrionaceae
- Desulfomicrobiaceae
- Desulfohalobaceae
- Desulfarculaceae
- Dermacoccaceae
- Deinococcaceae
- Coxiellaceae
- Corynebacteriaceae
- Citwelliaceae
- Clostridiales
- Cellulomonadaceae
- Carnobacteriaceae
- Cardiobacteriaceae
- Brachyspiraceae
- Beutnerbergiaceae
- Bdellovibrionaceae
- Bartonellaceae
- Bacteroidaceae
- Bacterioviraceae
- Bacillidae
- Anaerolinaceae
- Alicyclobacillaceae
- Alcanivoraceae
- Aerococcaceae
- Acidothermaceae
- Acidobacteriaceae
- Acidithiobacillaceae
- Acidimicrobiaceae
- Achleplasmataceae

G1                      G2                      G3
