# Supplementary material for: Xenobiotic Metabolism and Gut Microbiomes
Source: PubMed Central journal article supplement (PMC5047465; doi:10.1371/journal.pone.0163099), 2016-10-03
Supplement: pone.0163099.s020.pdf [file pone.0163099.s020.pdf]

| Region        | AG1 (0-10 years) | AG2 (10-30 years) | AG3 (30-40 years) | AG4 (40-50 years) | AG5 (50-60 years) | AG6 (60-above years) | References |
|---------------|------------------|-------------------|-------------------|-------------------|-------------------|----------------------|------------|
| American (AM) | NA               | NA                | NA                | NA                | NA                | NA                   | 1          |
| Danish (DA)   | NA               | NA                | NA                |                   |                   |                      | 2          |
| Spanish (ES)  | NA               |                   |                   |                   |                   |                      | 2          |
| French (FR)   | NA               | NA                | NA                | NA                | NA                |                      | 3          |
| Italian (IT)  | NA               | NA                | NA                | NA                | NA                |                      | 3          |
| Chinese (CH)  | NA               |                   |                   |                   |                   |                      | 4          |
| Indian (IN)   |                  | NA                | NA                | NA                | NA                | NA                   | 5          |
| Japanese (JP) |                  |                   |                   |                   | NA                | NA                   | 3          |

**References:**

1. Human Microbiome Project Consortium. Structure, function and diversity of the healthy human microbiome. *Nature*. 2012;486: 207-214.
2. Qin J, Li R, Raes J, Arumugam M, Burgdorf KS, Manichanh C et al. A human gut microbial gene catalogue established by metagenomic sequencing. *Nature*. 2010;464: 59-65.
3. Arumugam M, Raes J, Pelletier E, Le Paslier D, Yamada T, Mende DR et al. Enterotypes of the human gut microbiome. *Nature*. 2011;473: 174-180.
4. Qin J, Li Y, Cai Z, Li S, Zhu J, Zhang F et al. A metagenome-wide association study of gut microbiota in type 2 diabetes. *Nature*. 2012;490: 55-60.
5. Ghosh TS, Gupta SS, Bhattacharya T, Yadav D, Barik A, Chowdhury A et al. Gut microbiomes of Indian children of varying nutritional status. *PLoS One*. 2014;9: e95547.
