# Supplementary material for: Xenobiotic Metabolism and Gut Microbiomes
Source: PubMed Central journal article supplement (PMC5047465; doi:10.1371/journal.pone.0163099), 2016-10-03
Supplement: pone.0163099.s021.pdf [file pone.0163099.s021.pdf]

| Genus               | Cluster Number | Protein Counts | 1.1.1.- | 1.1.1.1 | 1.1.1.157 | 1.1.1.205 | 1.1.1.35 | 1.1.1.90 | 1.12.99.6 | 1.13.11.- | 1.13.11.1 | 1.13.11.2 | 1.13.11.3 | 1.13.11.39 | 1.13.11.41 | 1.13.11.5 | 1.13.11.8 | 1.13.12.- | 1.14.11.- |
|---------------------|----------------|----------------|---------|---------|-----------|-----------|----------|----------|-----------|-----------|-----------|-----------|-----------|------------|------------|-----------|-----------|-----------|-----------|
| Acaricomes          | 1              | 2              | 0       | 0       | 0         | 0         | 0        | 0        | 0         | 0         | 0         | 0         | 0         | 0          | 0          | 0         | 0         | 0         | 0         |
| Acaryochloris       | 2              | 88             | 1       | 1       | 0         | 1         | 0        | 0        | 0         | 0         | 0         | 0         | 0         | 0          | 0          | 0         | 0         | 0         | 0         |
| Acetivibrio         | 1              | 2              | 0       | 0       | 0         | 0         | 0        | 0        | 0         | 0         | 0         | 0         | 0         | 0          | 0          | 0         | 0         | 0         | 0         |
| Acetobacter         | 2              | 85             | 1       | 1       | 0         | 1         | 0        | 0        | 0         | 0         | 0         | 0         | 0         | 0          | 0          | 0         | 0         | 0         | 0         |
| Acetobacteraceae    | 1              | 2              | 0       | 0       | 0         | 0         | 0        | 0        | 0         | 0         | 0         | 0         | 0         | 0          | 0          | 0         | 0         | 0         | 0         |
| Acetobacterium      | 1              | 8              | 0       | 0       | 0         | 0         | 0        | 0        | 0         | 0         | 0         | 0         | 0         | 0          | 0          | 0         | 0         | 0         | 0         |
| Acetohalobium       | 2              | 79             | 0       | 1       | 0         | 1         | 0        | 0        | 0         | 0         | 0         | 0         | 0         | 0          | 0          | 0         | 0         | 0         | 0         |
| Acholeplasma        | 2              | 38             | 0       | 1       | 0         | 0         | 0        | 0        | 0         | 0         | 0         | 0         | 0         | 0          | 0          | 0         | 0         | 0         | 0         |
| Achromobacter       | 2              | 192            | 1       | 1       | 1         | 1         | 1        | 0        | 0         | 0         | 1         | 0         | 0         | 1          | 0          | 1         | 0         | 1         | 1         |
| Acidaminococcus     | 1              | 65             | 1       | 1       | 1         | 1         | 0        | 0        | 0         | 0         | 0         | 0         | 0         | 0          | 0          | 0         | 0         | 0         | 0         |
| Acidianus           | 1              | 9              | 0       | 0       | 0         | 0         | 0        | 0        | 0         | 0         | 0         | 0         | 0         | 0          | 0          | 0         | 0         | 0         | 0         |
| Acidilobus          | 1              | 8              | 0       | 0       | 0         | 0         | 0        | 0        | 0         | 0         | 0         | 0         | 0         | 0          | 0          | 0         | 0         | 0         | 0         |
| Acidimicrobium      | 2              | 58             | 1       | 1       | 1         | 1         | 1        | 0        | 0         | 0         | 0         | 0         | 0         | 0          | 0          | 1         | 1         | 0         | 0         |
| Acidiphilium        | 3              | 144            | 1       | 1       | 1         | 1         | 1        | 0        | 1         | 0         | 0         | 0         | 1         | 0          | 0          | 0         | 0         | 0         | 0         |
| Acidithiobacillus   | 2              | 70             | 1       | 1       | 0         | 1         | 0        | 0        | 1         | 0         | 0         | 0         | 0         | 0          | 0          | 0         | 0         | 0         | 0         |
| Acidobacterium      | 2              | 91             | 0       | 1       | 1         | 1         | 1        | 0        | 1         | 0         | 0         | 0         | 0         | 0          | 0          | 1         | 0         | 0         | 0         |
| Acidocella          | 1              | 2              | 0       | 0       | 0         | 0         | 0        | 0        | 0         | 0         | 0         | 0         | 0         | 0          | 0          | 0         | 0         | 0         | 0         |
| Acidothermus        | 2              | 68             | 1       | 1       | 0         | 1         | 1        | 0        | 0         | 0         | 0         | 0         | 0         | 1          | 0          | 0         | 0         | 0         | 0         |
| Acidovorax          | 3              | 217            | 1       | 1       | 1         | 1         | 1        | 0        | 0         | 0         | 1         | 1         | 0         | 1          | 0          | 0         | 1         | 1         | 0         |
| Aciduliprofundum    | 1              | 11             | 0       | 0       | 0         | 0         | 0        | 0        | 0         | 0         | 0         | 0         | 0         | 0          | 0          | 0         | 0         | 0         | 0         |
| Acinetobacter       | 3              | 188            | 1       | 1       | 1         | 1         | 1        | 1        | 0         | 0         | 1         | 0         | 1         | 0          | 0          | 0         | 0         | 0         | 0         |
| Actinobacillus      | 2              | 112            | 1       | 1       | 0         | 1         | 0        | 0        | 1         | 0         | 0         | 0         | 0         | 0          | 0          | 0         | 0         | 0         | 0         |
| Actinomadura        | 1              | 1              | 0       | 0       | 0         | 0         | 0        | 0        | 0         | 0         | 0         | 0         | 0         | 0          | 0          | 0         | 0         | 0         | 0         |
| Actinoplanes        | 1              | 52             | 1       | 0       | 0         | 0         | 0        | 0        | 0         | 0         | 0         | 0         | 0         | 0          | 0          | 0         | 0         | 0         | 0         |
| Actinopolyspora     | 1              | 2              | 0       | 0       | 0         | 0         | 0        | 0        | 0         | 0         | 0         | 0         | 0         | 0          | 0          | 0         | 0         | 0         | 0         |
| Actinosynnema       | 2              | 122            | 1       | 1       | 1         | 1         | 1        | 0        | 0         | 0         | 0         | 0         | 1         | 0          | 0          | 1         | 0         | 0         | 0         |
| Advenella           | 1              | 30             | 0       | 0       | 0         | 0         | 0        | 0        | 0         | 0         | 0         | 0         | 0         | 0          | 0          | 0         | 0         | 0         | 0         |
| Aequorivita         | 1              | 12             | 0       | 0       | 0         | 0         | 0        | 0        | 0         | 0         | 0         | 0         | 0         | 0          | 0          | 0         | 0         | 0         | 0         |
| Aerococcus          | 2              | 57             | 0       | 1       | 0         | 1         | 1        | 0        | 0         | 0         | 0         | 0         | 0         | 0          | 0          | 0         | 0         | 0         | 0         |
| Aeromonas           | 2              | 127            | 1       | 1       | 0         | 1         | 1        | 0        | 1         | 0         | 0         | 0         | 0         | 0          | 0          | 1         | 0         | 0         | 0         |
| Aeropyrum           | 1              | 13             | 0       | 0       | 0         | 0         | 0        | 0        | 0         | 0         | 0         | 0         | 0         | 0          | 0          | 0         | 0         | 0         | 0         |
| Afipia              | 1              | 54             | 0       | 1       | 1         | 1         | 1        | 0        | 0         | 0         | 0         | 0         | 0         | 0          | 0          | 0         | 0         | 0         | 0         |
| Aggregatibacter     | 1              | 81             | 0       | 1       | 0         | 1         | 0        | 0        | 1         | 0         | 0         | 0         | 0         | 0          | 0          | 0         | 0         | 0         | 0         |
| Agrobacterium       | 2              | 242            | 1       | 1       | 1         | 1         | 1        | 0        | 0         | 0         | 1         | 1         | 1         | 1          | 0          | 1         | 1         | 0         | 1         |
| Ahrensia            | 1              | 2              | 0       | 0       | 0         | 0         | 0        | 0        | 0         | 0         | 0         | 0         | 0         | 0          | 0          | 0         | 0         | 0         | 0         |
| Akkermansia         | 2              | 47             | 1       | 1       | 0         | 1         | 0        | 0        | 1         | 0         | 0         | 0         | 0         | 0          | 0          | 0         | 0         | 0         | 0         |
| Albidiferax         | 3              | 144            | 1       | 1       | 1         | 1         | 1        | 0        | 1         | 0         | 0         | 0         | 0         | 0          | 0          | 0         | 1         | 0         | 0         |
| Alcaligenes         | 1              | 21             | 0       | 0       | 0         | 0         | 0        | 0        | 0         | 0         | 0         | 0         | 0         | 0          | 0          | 0         | 0         | 0         | 0         |
| Alcanivorax         | 2              | 146            | 1       | 1       | 0         | 1         | 1        | 0        | 0         | 0         | 0         | 0         | 0         | 0          | 0          | 0         | 0         | 1         | 0         |
| Alicyclophilus      | 3              | 152            | 1       | 1       | 1         | 1         | 1        | 0        | 0         | 0         | 1         | 1         | 0         | 0          | 0          | 0         | 0         | 0         | 0         |
| Alicyclobacillus    | 2              | 91             | 1       | 1       | 1         | 1         | 1        | 0        | 0         | 0         | 0         | 1         | 0         | 0          | 0          | 0         | 0         | 0         | 0         |
| Aliivibrio          | 2              | 118            | 1       | 1       | 0         | 1         | 1        | 0        | 0         | 0         | 0         | 0         | 0         | 0          | 0          | 0         | 0         | 0         | 0         |
| Alishewanella       | 1              | 1              | 0       | 0       | 0         | 0         | 0        | 0        | 0         | 0         | 0         | 0         | 0         | 0          | 0          | 0         | 0         | 0         | 0         |
| Alistipes           | 1              | 52             | 1       | 0       | 0         | 1         | 0        | 0        | 0         | 0         | 0         | 0         | 0         | 0          | 0          | 0         | 0         | 0         | 0         |
| Alkalilimnicola     | 2              | 97             | 0       | 1       | 0         | 1         | 1        | 0        | 1         | 0         | 0         | 0         | 0         | 1          | 0          | 0         | 0         | 0         | 0         |
| Alkaliphilus        | 2              | 62             | 1       | 1       | 1         | 1         | 0        | 0        | 0         | 0         | 0         | 0         | 0         | 0          | 0          | 0         | 0         | 0         | 0         |
| Allochromatium      | 2              | 84             | 1       | 1       | 0         | 1         | 0        | 0        | 1         | 0         | 0         | 0         | 0         | 0          | 0          | 0         | 0         | 0         | 0         |
| Alphaproteobacteria | 1              | 3              | 0       | 0       | 0         | 0         | 0        | 0        | 0         | 0         | 0         | 0         | 0         | 0          | 0          | 0         | 0         | 0         | 0         |
| Alteromonadales     | 1              | 12             | 0       | 0       | 0         | 0         | 0        | 0        | 0         | 0         | 0         | 0         | 0         | 0          | 0          | 0         | 0         | 0         | 0         |
| Alteromonas         | 1              | 37             | 0       | 0       | 0         | 0         | 0        | 0        | 0         | 0         | 0         | 0         | 0         | 0          | 0          | 0         | 0         | 0         | 0         |
| Aminobacter         | 1              | 4              | 0       | 0       | 0         | 0         | 0        | 0        | 0         | 0         | 0         | 0         | 0         | 0          | 0          | 0         | 0         | 0         | 0         |
| Aminobacterium      | 2              | 59             | 0       | 1       | 0         | 1         | 0        | 0        | 0         | 0         | 0         | 0         | 0         | 0          | 0          | 0         | 0         | 0         | 0         |

| Genus            | Cluster Number | Protein Counts | 1.1.1.- | 1.1.1.1 | 1.1.1.157 | 1.1.1.205 | 1.1.1.35 | 1.1.1.90 | 1.12.99.6 | 1.13.11.- | 1.13.11.1 | 1.13.11.2 | 1.13.11.3 | 1.13.11.39 | 1.13.11.41 | 1.13.11.5 | 1.13.11.8 | 1.13.12.- | 1.14.11.- |
|------------------|----------------|----------------|---------|---------|-----------|-----------|----------|----------|-----------|-----------|-----------|-----------|-----------|------------|------------|-----------|-----------|-----------|-----------|
| Ammonifex        | 2              | 50             | 0       | 1       | 0         | 1         | 0        | 0        | 1         | 0         | 0         | 0         | 0         | 0          | 0          | 0         | 0         | 0         | 0         |
| Amphibacillus    | 1              | 13             | 0       | 0       | 0         | 0         | 0        | 0        | 0         | 0         | 0         | 0         | 0         | 0          | 0          | 0         | 0         | 0         | 0         |
| Amphritea        | 1              | 2              | 0       | 0       | 0         | 0         | 0        | 0        | 0         | 0         | 0         | 0         | 0         | 0          | 0          | 0         | 0         | 0         | 0         |
| Amycolatopsis    | 2              | 201            | 1       | 1       | 1         | 1         | 1        | 0        | 1         | 0         | 1         | 1         | 1         | 1          | 0          | 1         | 0         | 0         | 0         |
| Amycolobicoccus  | 1              | 43             | 1       | 0       | 0         | 0         | 0        | 0        | 1         | 0         | 0         | 0         | 0         | 0          | 0          | 0         | 0         | 0         | 0         |
| Anabaena         | 2              | 92             | 1       | 1       | 0         | 1         | 1        | 0        | 1         | 0         | 0         | 0         | 0         | 0          | 0          | 0         | 0         | 0         | 0         |
| Anaerobaculum    | 1              | 11             | 0       | 0       | 0         | 0         | 0        | 0        | 0         | 0         | 0         | 0         | 0         | 0          | 0          | 0         | 0         | 0         | 0         |
| Anaerococcus     | 2              | 46             | 0       | 1       | 1         | 1         | 1        | 0        | 0         | 0         | 0         | 0         | 0         | 0          | 0          | 0         | 0         | 0         | 0         |
| Anaerolinea      | 2              | 66             | 1       | 1       | 0         | 1         | 0        | 0        | 0         | 0         | 0         | 0         | 0         | 0          | 0          | 0         | 0         | 0         | 0         |
| Anaeromyxobacter | 3              | 117            | 1       | 1       | 1         | 1         | 1        | 0        | 1         | 0         | 0         | 0         | 0         | 0          | 1          | 1         | 0         | 0         | 0         |
| Anaerostipes     | 1              | 44             | 1       | 0       | 0         | 1         | 1        | 0        | 0         | 0         | 0         | 0         | 0         | 0          | 0          | 0         | 0         | 0         | 0         |
| Anaerotruncus    | 1              | 2              | 0       | 0       | 0         | 0         | 0        | 0        | 0         | 0         | 0         | 0         | 0         | 0          | 0          | 0         | 0         | 0         | 0         |
| Anaplasma        | 1              | 35             | 0       | 0       | 0         | 1         | 0        | 0        | 0         | 0         | 0         | 0         | 1         | 0          | 0          | 0         | 0         | 0         | 0         |
| Ancylobacter     | 1              | 3              | 0       | 0       | 0         | 0         | 0        | 0        | 1         | 0         | 0         | 0         | 0         | 0          | 0          | 0         | 0         | 0         | 0         |
| Aneurinibacillus | 1              | 1              | 0       | 0       | 0         | 0         | 0        | 0        | 0         | 0         | 0         | 0         | 0         | 0          | 0          | 0         | 0         | 0         | 0         |
| Angomonas        | 1              | 1              | 0       | 0       | 0         | 0         | 0        | 0        | 0         | 0         | 0         | 0         | 0         | 0          | 0          | 0         | 0         | 0         | 0         |
| Anoxybacillus    | 2              | 72             | 1       | 1       | 0         | 1         | 1        | 0        | 0         | 0         | 0         | 0         | 0         | 0          | 0          | 0         | 0         | 0         | 0         |
| Aquifex          | 2              | 45             | 0       | 1       | 0         | 1         | 0        | 0        | 1         | 0         | 0         | 0         | 0         | 0          | 0          | 0         | 0         | 0         | 0         |
| Aquimarina       | 1              | 2              | 0       | 0       | 0         | 0         | 0        | 0        | 0         | 0         | 0         | 0         | 0         | 0          | 0          | 0         | 0         | 0         | 0         |
| Arcanobacterium  | 2              | 45             | 0       | 1       | 0         | 1         | 0        | 0        | 0         | 0         | 0         | 0         | 0         | 0          | 0          | 0         | 0         | 0         | 0         |
| Archaeoglobus    | 1              | 14             | 0       | 0       | 0         | 0         | 0        | 0        | 0         | 0         | 0         | 0         | 0         | 0          | 0          | 0         | 0         | 0         | 0         |
| Arcobacter       | 2              | 101            | 1       | 1       | 0         | 1         | 0        | 0        | 1         | 0         | 0         | 0         | 0         | 0          | 0          | 0         | 0         | 0         | 0         |
| Aromatoleum      | 3              | 133            | 1       | 1       | 1         | 1         | 1        | 0        | 0         | 0         | 0         | 0         | 0         | 0          | 0          | 0         | 0         | 0         | 0         |
| Arsenophonus     | 1              | 4              | 0       | 0       | 0         | 0         | 0        | 0        | 0         | 0         | 0         | 0         | 0         | 0          | 0          | 0         | 0         | 0         | 0         |
| Arthrobacter     | 2              | 206            | 1       | 1       | 1         | 1         | 1        | 0        | 0         | 0         | 1         | 1         | 1         | 1          | 0          | 0         | 1         | 1         | 0         |
| Arthrospira      | 2              | 67             | 1       | 1       | 0         | 1         | 0        | 0        | 0         | 0         | 0         | 0         | 0         | 0          | 0          | 0         | 0         | 0         | 0         |
| Aster            | 1              | 10             | 0       | 0       | 0         | 0         | 0        | 0        | 0         | 0         | 0         | 0         | 0         | 0          | 0          | 0         | 0         | 0         | 0         |
| Asticcacaulis    | 2              | 103            | 1       | 1       | 1         | 1         | 1        | 0        | 0         | 0         | 0         | 0         | 0         | 0          | 0          | 1         | 1         | 0         | 0         |
| Atopobium        | 1              | 28             | 1       | 1       | 0         | 1         | 1        | 0        | 0         | 0         | 0         | 0         | 0         | 0          | 0          | 0         | 0         | 0         | 0         |
| Aurantimonas     | 1              | 2              | 0       | 0       | 0         | 0         | 0        | 0        | 0         | 0         | 0         | 0         | 0         | 0          | 0          | 0         | 0         | 0         | 0         |
| Avibacterium     | 1              | 17             | 0       | 0       | 0         | 1         | 0        | 0        | 0         | 0         | 0         | 0         | 0         | 0          | 0          | 0         | 0         | 0         | 0         |
| Azoarcus         | 3              | 172            | 1       | 1       | 1         | 1         | 0        | 0        | 1         | 0         | 0         | 1         | 0         | 1          | 0          | 0         | 1         | 0         | 0         |
| Azorhizobium     | 3              | 149            | 1       | 1       | 1         | 1         | 1        | 0        | 1         | 0         | 1         | 0         | 1         | 1          | 0          | 0         | 0         | 0         | 0         |
| Azorhizophilus   | 1              | 4              | 0       | 0       | 0         | 0         | 0        | 0        | 0         | 0         | 0         | 0         | 0         | 0          | 0          | 0         | 0         | 0         | 0         |
| Azospira         | 1              | 19             | 0       | 0       | 0         | 0         | 0        | 0        | 0         | 0         | 0         | 0         | 0         | 0          | 0          | 0         | 0         | 0         | 0         |
| Azospirillum     | 2              | 198            | 1       | 1       | 1         | 1         | 1        | 0        | 1         | 0         | 1         | 0         | 1         | 0          | 0          | 1         | 0         | 0         | 0         |
| Azotobacter      | 3              | 183            | 1       | 1       | 1         | 1         | 1        | 0        | 1         | 1         | 0         | 1         | 1         | 0          | 0          | 1         | 1         | 1         | 0         |
| Bacillales       | 1              | 9              | 0       | 0       | 0         | 1         | 0        | 0        | 0         | 0         | 0         | 0         | 0         | 0          | 0          | 0         | 0         | 0         | 0         |
| Bacilli          | 1              | 3              | 0       | 0       | 0         | 0         | 0        | 0        | 0         | 0         | 0         | 0         | 0         | 0          | 0          | 0         | 0         | 0         | 0         |
| Bacillus         | 2              | 237            | 1       | 1       | 1         | 1         | 1        | 0        | 0         | 0         | 0         | 1         | 0         | 0          | 0          | 1         | 0         | 0         | 0         |
| Bacteria         | 2              | 86             | 0       | 1       | 1         | 1         | 1        | 0        | 0         | 0         | 0         | 0         | 0         | 0          | 0          | 0         | 0         | 1         | 0         |
| Bacteriovorax    | 2              | 98             | 1       | 1       | 1         | 1         | 1        | 0        | 0         | 0         | 0         | 0         | 0         | 0          | 0          | 1         | 0         | 0         | 0         |
| Bacteroidales    | 2              | 59             | 1       | 0       | 0         | 1         | 0        | 0        | 1         | 0         | 0         | 0         | 0         | 0          | 0          | 0         | 0         | 0         | 0         |
| Bacteroides      | 2              | 96             | 1       | 1       | 0         | 1         | 0        | 0        | 1         | 0         | 0         | 0         | 0         | 0          | 0          | 0         | 0         | 0         | 0         |
| Bacteroidetes    | 1              | 2              | 0       | 0       | 0         | 0         | 0        | 0        | 0         | 0         | 0         | 0         | 0         | 0          | 0          | 0         | 0         | 0         | 0         |
| Bartonella       | 2              | 50             | 1       | 1       | 0         | 1         | 0        | 0        | 0         | 0         | 0         | 0         | 0         | 0          | 0          | 0         | 0         | 0         | 0         |
| Baumannia        | 2              | 24             | 0       | 0       | 0         | 1         | 0        | 0        | 0         | 0         | 0         | 0         | 0         | 0          | 0          | 0         | 0         | 0         | 0         |
| Bdellovibrio     | 2              | 87             | 1       | 1       | 1         | 1         | 1        | 0        | 0         | 0         | 0         | 0         | 0         | 0          | 0          | 1         | 0         | 0         | 0         |
| Beijerinckia     | 3              | 123            | 1       | 1       | 1         | 1         | 1        | 0        | 1         | 0         | 0         | 0         | 0         | 0          | 0          | 0         | 0         | 0         | 0         |
| Belliella        | 1              | 14             | 0       | 0       | 0         | 0         | 0        | 0        | 0         | 0         | 0         | 0         | 0         | 0          | 0          | 0         | 0         | 0         | 0         |
| Beutenbergia     | 2              | 82             | 1       | 1       | 0         | 1         | 1        | 0        | 0         | 0         | 0         | 1         | 0         | 0          | 0          | 0         | 0         | 0         | 0         |
| Bifidobacterium  | 2              | 61             | 1       | 1       | 0         | 1         | 1        | 0        | 0         | 0         | 0         | 0         | 0         | 0          | 0          | 0         | 0         | 0         | 0         |

| Genus                | Cluster Number | Protein Counts | 1.1.1.- | 1.1.1.1 | 1.1.1.157 | 1.1.1.205 | 1.1.1.35 | 1.1.1.90 | 1.12.99.6 | 1.13.11.- | 1.13.11.1 | 1.13.11.2 | 1.13.11.3 | 1.13.11.39 | 1.13.11.41 | 1.13.11.5 | 1.13.11.8 | 1.13.12.- | 1.14.11.- |
|----------------------|----------------|----------------|---------|---------|-----------|-----------|----------|----------|-----------|-----------|-----------|-----------|-----------|------------|------------|-----------|-----------|-----------|-----------|
| Bizonia              | 1              | 1              | 0       | 0       | 0         | 0         | 0        | 0        | 0         | 0         | 0         | 0         | 0         | 0          | 0          | 0         | 0         | 0         | 0         |
| Blastococcus         | 1              | 39             | 0       | 0       | 0         | 0         | 0        | 0        | 0         | 0         | 0         | 0         | 0         | 0          | 0          | 0         | 0         | 0         | 0         |
| Blattabacterium      | 1              | 23             | 0       | 0       | 0         | 1         | 0        | 0        | 0         | 0         | 0         | 0         | 0         | 0          | 0          | 0         | 0         | 0         | 0         |
| Blautia              | 1              | 22             | 1       | 0       | 0         | 0         | 0        | 0        | 0         | 0         | 0         | 0         | 0         | 0          | 0          | 0         | 0         | 0         | 0         |
| Bordetella           | 3              | 227            | 1       | 1       | 1         | 1         | 1        | 0        | 0         | 1         | 1         | 0         | 1         | 1          | 0          | 1         | 0         | 0         | 1         |
| Borrelia             | 1              | 32             | 1       | 0       | 0         | 1         | 0        | 0        | 0         | 0         | 0         | 0         | 0         | 0          | 0          | 0         | 0         | 0         | 0         |
| Brachybacterium      | 1              | 18             | 0       | 0       | 0         | 0         | 0        | 0        | 0         | 0         | 0         | 0         | 0         | 0          | 0          | 0         | 0         | 0         | 0         |
| Brachymonas          | 1              | 4              | 0       | 0       | 0         | 0         | 0        | 0        | 0         | 0         | 0         | 0         | 0         | 0          | 0          | 0         | 0         | 0         | 0         |
| Brachyspira          | 2              | 79             | 1       | 1       | 1         | 1         | 1        | 0        | 0         | 0         | 0         | 0         | 0         | 0          | 0          | 0         | 0         | 0         | 0         |
| Bradyrhizobiaceae    | 1              | 20             | 0       | 0       | 0         | 1         | 1        | 0        | 0         | 0         | 0         | 0         | 0         | 0          | 0          | 0         | 0         | 0         | 0         |
| Bradyrhizobium       | 3              | 254            | 1       | 1       | 1         | 1         | 1        | 0        | 1         | 0         | 1         | 0         | 1         | 1          | 0          | 1         | 1         | 0         | 0         |
| Brenneria            | 1              | 20             | 0       | 1       | 0         | 1         | 0        | 0        | 0         | 0         | 0         | 0         | 0         | 0          | 0          | 0         | 0         | 0         | 0         |
| Brevibacillus        | 2              | 122            | 1       | 1       | 1         | 1         | 1        | 0        | 0         | 0         | 0         | 0         | 0         | 0          | 0          | 1         | 0         | 0         | 0         |
| Brevibacterium       | 1              | 4              | 0       | 0       | 0         | 0         | 0        | 0        | 0         | 0         | 0         | 0         | 0         | 0          | 0          | 0         | 0         | 1         | 0         |
| Brevundimonas        | 2              | 105            | 1       | 1       | 1         | 1         | 0        | 0        | 0         | 0         | 0         | 0         | 1         | 0          | 0          | 1         | 1         | 0         | 0         |
| Brucella             | 3              | 138            | 1       | 1       | 1         | 1         | 1        | 0        | 0         | 0         | 0         | 0         | 1         | 0          | 0          | 0         | 0         | 0         | 1         |
| Buchnera             | 1              | 26             | 0       | 0       | 0         | 0         | 0        | 0        | 0         | 0         | 0         | 0         | 0         | 0          | 0          | 0         | 0         | 0         | 0         |
| Burkholderia         | 3              | 424            | 1       | 1       | 1         | 1         | 1        | 0        | 1         | 1         | 1         | 1         | 1         | 1          | 1          | 1         | 1         | 1         | 0         |
| Burkholderiaceae     | 3              | 143            | 1       | 1       | 1         | 1         | 1        | 0        | 0         | 0         | 0         | 0         | 0         | 0          | 0          | 0         | 0         | 0         | 0         |
| Burkholderiales      | 1              | 24             | 0       | 1       | 0         | 0         | 0        | 0        | 1         | 0         | 0         | 0         | 0         | 0          | 0          | 0         | 0         | 0         | 0         |
| Buttiauxella         | 1              | 2              | 0       | 0       | 0         | 0         | 0        | 0        | 0         | 0         | 0         | 0         | 0         | 0          | 0          | 0         | 0         | 0         | 0         |
| Butyrivibrio         | 2              | 67             | 1       | 1       | 0         | 1         | 1        | 0        | 0         | 0         | 0         | 0         | 0         | 0          | 0          | 0         | 1         | 0         | 0         |
| Caldanaerobacter     | 2              | 63             | 1       | 1       | 1         | 1         | 0        | 0        | 0         | 0         | 0         | 0         | 0         | 0          | 0          | 0         | 0         | 0         | 0         |
| Caldicellulosiruptor | 2              | 75             | 1       | 1       | 0         | 1         | 0        | 0        | 0         | 0         | 0         | 0         | 0         | 0          | 0          | 0         | 0         | 0         | 0         |
| Caldilinea           | 1              | 23             | 0       | 0       | 0         | 0         | 0        | 0        | 0         | 0         | 0         | 1         | 0         | 0          | 0          | 0         | 0         | 0         | 0         |
| Caldimonas           | 1              | 6              | 0       | 0       | 0         | 0         | 0        | 0        | 0         | 0         | 0         | 0         | 0         | 0          | 0          | 0         | 0         | 0         | 0         |
| Caldisericum         | 1              | 10             | 0       | 0       | 0         | 0         | 0        | 0        | 0         | 0         | 0         | 0         | 0         | 0          | 0          | 0         | 0         | 0         | 0         |
| Caldisphaera         | 1              | 7              | 0       | 0       | 0         | 0         | 0        | 0        | 0         | 0         | 0         | 0         | 0         | 0          | 0          | 0         | 0         | 0         | 0         |
| Calditerrivibrio     | 2              | 74             | 1       | 1       | 0         | 1         | 0        | 0        | 0         | 0         | 0         | 0         | 0         | 0          | 0          | 0         | 0         | 0         | 0         |
| Caldivirga           | 1              | 13             | 0       | 0       | 0         | 0         | 0        | 0        | 0         | 0         | 0         | 0         | 0         | 0          | 0          | 0         | 0         | 0         | 0         |
| Calothrix            | 1              | 43             | 0       | 1       | 0         | 1         | 0        | 0        | 1         | 0         | 0         | 0         | 0         | 0          | 0          | 0         | 0         | 0         | 0         |
| Calyptogena          | 2              | 34             | 0       | 0       | 0         | 1         | 0        | 0        | 0         | 0         | 0         | 0         | 0         | 0          | 0          | 0         | 0         | 0         | 0         |
| Campylobacter        | 2              | 80             | 1       | 1       | 0         | 1         | 0        | 0        | 1         | 0         | 0         | 0         | 0         | 0          | 0          | 0         | 0         | 0         | 0         |
| Candidatus           | 2              | 290            | 1       | 1       | 1         | 1         | 1        | 0        | 1         | 0         | 0         | 0         | 1         | 1          | 0          | 1         | 1         | 0         | 0         |
| Capnocytophaga       | 1              | 50             | 1       | 0       | 0         | 1         | 0        | 0        | 0         | 0         | 0         | 0         | 0         | 0          | 0          | 0         | 0         | 0         | 0         |
| Carbophilus          | 1              | 2              | 0       | 0       | 0         | 0         | 0        | 0        | 0         | 0         | 0         | 0         | 0         | 0          | 0          | 0         | 0         | 0         | 0         |
| Carboxydibrachium    | 1              | 14             | 0       | 1       | 0         | 1         | 0        | 0        | 0         | 0         | 0         | 0         | 0         | 0          | 0          | 0         | 0         | 0         | 0         |
| Carboxydotherrmus    | 2              | 68             | 1       | 1       | 1         | 1         | 1        | 0        | 0         | 0         | 0         | 0         | 0         | 0          | 0          | 0         | 0         | 0         | 0         |
| Carica               | 1              | 2              | 0       | 0       | 0         | 0         | 0        | 0        | 0         | 0         | 0         | 0         | 0         | 0          | 0          | 0         | 0         | 0         | 0         |
| Carnobacterium       | 2              | 71             | 1       | 1       | 1         | 1         | 1        | 0        | 0         | 0         | 0         | 0         | 0         | 0          | 0          | 0         | 0         | 0         | 0         |
| Catenibacterium      | 1              | 2              | 0       | 0       | 0         | 0         | 0        | 0        | 0         | 0         | 0         | 0         | 0         | 0          | 0          | 0         | 0         | 0         | 0         |
| Catenovulum          | 1              | 2              | 0       | 0       | 0         | 0         | 0        | 0        | 0         | 0         | 0         | 0         | 0         | 0          | 0          | 0         | 0         | 0         | 0         |
| Catenulispora        | 3              | 159            | 1       | 1       | 1         | 1         | 1        | 0        | 0         | 0         | 1         | 0         | 1         | 1          | 0          | 1         | 0         | 0         | 0         |
| Caulobacter          | 3              | 168            | 1       | 1       | 1         | 1         | 1        | 0        | 0         | 0         | 0         | 0         | 1         | 1          | 0          | 1         | 0         | 0         | 0         |
| Cedecea              | 1              | 45             | 0       | 1       | 0         | 1         | 0        | 0        | 0         | 0         | 0         | 0         | 0         | 0          | 0          | 0         | 0         | 0         | 0         |
| Cellulomonas         | 2              | 96             | 1       | 1       | 0         | 1         | 1        | 0        | 0         | 0         | 0         | 1         | 0         | 0          | 0          | 0         | 0         | 1         | 0         |
| Cellulophaga         | 2              | 105            | 1       | 1       | 1         | 1         | 1        | 0        | 0         | 0         | 0         | 0         | 0         | 0          | 0          | 1         | 0         | 0         | 0         |
| Cellulosilyticum     | 1              | 14             | 0       | 0       | 0         | 0         | 0        | 0        | 0         | 0         | 0         | 0         | 0         | 0          | 0          | 0         | 0         | 0         | 0         |
| Cellvibrio           | 2              | 85             | 0       | 0       | 0         | 1         | 0        | 0        | 0         | 0         | 0         | 0         | 0         | 0          | 0          | 0         | 0         | 1         | 0         |
| Cenarchaeum          | 1              | 7              | 0       | 0       | 0         | 0         | 0        | 0        | 0         | 0         | 0         | 0         | 0         | 0          | 0          | 0         | 0         | 0         | 0         |
| Chamaesiphon         | 1              | 13             | 0       | 0       | 0         | 0         | 0        | 0        | 0         | 0         | 0         | 0         | 0         | 0          | 0          | 0         | 0         | 0         | 0         |
| Chelativorans        | 3              | 136            | 1       | 1       | 1         | 1         | 1        | 0        | 0         | 0         | 0         | 1         | 1         | 1          | 0          | 1         | 0         | 0         | 1         |

| Genus                  | Cluster Number | Protein Counts | 1.1.1.- | 1.1.1.1 | 1.1.1.157 | 1.1.1.205 | 1.1.1.35 | 1.1.1.90 | 1.12.99.6 | 1.13.11.- | 1.13.11.1 | 1.13.11.2 | 1.13.11.3 | 1.13.11.39 | 1.13.11.41 | 1.13.11.5 | 1.13.11.8 | 1.13.12.- | 1.14.11.- |
|------------------------|----------------|----------------|---------|---------|-----------|-----------|----------|----------|-----------|-----------|-----------|-----------|-----------|------------|------------|-----------|-----------|-----------|-----------|
| Chelatococcus          | 1              | 2              | 0       | 0       | 0         | 0         | 0        | 0        | 0         | 0         | 0         | 0         | 0         | 0          | 0          | 1         | 0         | 0         | 0         |
| Chitinophaga           | 2              | 98             | 1       | 1       | 1         | 1         | 0        | 0        | 0         | 0         | 0         | 0         | 0         | 0          | 0          | 1         | 0         | 0         | 0         |
| Chlamydia              | 1              | 36             | 0       | 0       | 0         | 1         | 0        | 0        | 0         | 0         | 0         | 0         | 0         | 0          | 0          | 0         | 0         | 0         | 0         |
| Chlamydomonas          | 1              | 3              | 0       | 0       | 0         | 0         | 0        | 0        | 0         | 0         | 0         | 0         | 0         | 0          | 0          | 0         | 0         | 0         | 0         |
| Chlamydomphila         | 1              | 31             | 0       | 0       | 0         | 1         | 0        | 0        | 0         | 0         | 0         | 0         | 0         | 0          | 0          | 0         | 0         | 0         | 0         |
| Chlorobaculum          | 2              | 61             | 0       | 1       | 0         | 1         | 0        | 0        | 1         | 0         | 0         | 0         | 0         | 0          | 0          | 0         | 0         | 0         | 0         |
| Chlorobium             | 2              | 89             | 1       | 1       | 0         | 1         | 0        | 0        | 1         | 0         | 0         | 0         | 0         | 0          | 0          | 0         | 0         | 0         | 0         |
| Chlorobium/Pelodictyon | 1              | 2              | 0       | 0       | 0         | 0         | 0        | 0        | 0         | 0         | 0         | 0         | 0         | 0          | 0          | 0         | 0         | 0         | 0         |
| Chloroflexus           | 2              | 105            | 0       | 1       | 0         | 1         | 1        | 0        | 1         | 0         | 0         | 1         | 0         | 0          | 0          | 1         | 0         | 0         | 0         |
| Chlorogloeopsis        | 1              | 9              | 0       | 0       | 0         | 1         | 0        | 0        | 0         | 0         | 0         | 0         | 0         | 0          | 0          | 0         | 0         | 0         | 0         |
| Chloroherpeton         | 2              | 59             | 0       | 1       | 0         | 1         | 0        | 0        | 1         | 0         | 0         | 0         | 0         | 0          | 0          | 0         | 0         | 0         | 0         |
| Chromobacterium        | 2              | 117            | 1       | 1       | 1         | 1         | 1        | 0        | 0         | 0         | 0         | 0         | 0         | 1          | 0          | 1         | 0         | 0         | 0         |
| Chromohalobacter       | 2              | 145            | 1       | 1       | 0         | 1         | 1        | 0        | 0         | 0         | 0         | 0         | 1         | 0          | 0          | 0         | 1         | 0         | 0         |
| Chroococciopsis        | 1              | 24             | 0       | 0       | 0         | 0         | 0        | 0        | 0         | 0         | 0         | 0         | 0         | 0          | 0          | 0         | 0         | 0         | 0         |
| Chryseobacterium       | 2              | 104            | 1       | 1       | 1         | 1         | 1        | 0        | 0         | 0         | 1         | 0         | 0         | 0          | 0          | 0         | 1         | 0         | 0         |
| Citricella             | 1              | 13             | 0       | 0       | 0         | 0         | 0        | 0        | 1         | 0         | 0         | 1         | 0         | 0          | 0          | 0         | 0         | 0         | 0         |
| Citrobacter            | 2              | 190            | 1       | 1       | 0         | 1         | 1        | 0        | 1         | 0         | 0         | 0         | 1         | 0          | 0          | 0         | 1         | 0         | 0         |
| Clavibacter            | 2              | 83             | 1       | 1       | 0         | 1         | 1        | 0        | 0         | 0         | 0         | 0         | 0         | 0          | 0          | 0         | 0         | 0         | 0         |
| Clonorchis             | 1              | 1              | 0       | 0       | 0         | 0         | 0        | 0        | 0         | 0         | 0         | 0         | 0         | 0          | 0          | 0         | 0         | 0         | 0         |
| Clostridiales          | 2              | 77             | 1       | 1       | 0         | 1         | 1        | 0        | 0         | 0         | 0         | 0         | 0         | 0          | 0          | 0         | 0         | 0         | 0         |
| Clostridium            | 2              | 191            | 1       | 1       | 1         | 1         | 1        | 0        | 0         | 0         | 0         | 0         | 0         | 0          | 0          | 0         | 0         | 0         | 0         |
| Cohnella               | 1              | 2              | 0       | 0       | 0         | 0         | 0        | 0        | 0         | 0         | 0         | 0         | 0         | 0          | 0          | 0         | 0         | 0         | 0         |
| Coleofasciculus        | 1              | 4              | 0       | 0       | 0         | 0         | 0        | 0        | 0         | 0         | 0         | 0         | 0         | 0          | 0          | 0         | 0         | 0         | 0         |
| Collimonas             | 1              | 35             | 0       | 0       | 0         | 0         | 0        | 0        | 0         | 0         | 0         | 0         | 0         | 0          | 0          | 0         | 0         | 0         | 0         |
| Colwellia              | 2              | 130            | 1       | 1       | 0         | 1         | 1        | 0        | 0         | 0         | 0         | 0         | 0         | 0          | 0          | 0         | 0         | 0         | 0         |
| Comamonas              | 2              | 196            | 1       | 1       | 1         | 1         | 1        | 0        | 0         | 0         | 1         | 1         | 0         | 0          | 0          | 0         | 1         | 0         | 0         |
| Conexibacter           | 3              | 117            | 0       | 1       | 1         | 1         | 1        | 0        | 1         | 0         | 0         | 1         | 0         | 0          | 0          | 1         | 0         | 0         | 0         |
| Coprobacillus          | 1              | 2              | 0       | 0       | 0         | 0         | 0        | 0        | 0         | 0         | 0         | 0         | 0         | 0          | 0          | 0         | 0         | 0         | 0         |
| Coprococcus            | 2              | 76             | 1       | 1       | 1         | 1         | 1        | 0        | 0         | 0         | 0         | 0         | 0         | 0          | 0          | 1         | 0         | 0         | 0         |
| Coprothermobacter      | 2              | 45             | 1       | 1       | 0         | 1         | 0        | 0        | 0         | 0         | 0         | 0         | 0         | 0          | 0          | 0         | 0         | 0         | 0         |
| Coralimargarita        | 2              | 68             | 1       | 1       | 0         | 1         | 0        | 0        | 0         | 0         | 0         | 0         | 0         | 0          | 0          | 1         | 0         | 0         | 0         |
| Corallococcus          | 1              | 29             | 0       | 0       | 0         | 0         | 0        | 0        | 0         | 0         | 0         | 0         | 0         | 0          | 0          | 0         | 0         | 0         | 0         |
| Coriobacterium         | 2              | 36             | 1       | 1       | 1         | 1         | 0        | 0        | 0         | 0         | 0         | 0         | 0         | 0          | 0          | 0         | 0         | 0         | 0         |
| Corynebacterineae      | 1              | 5              | 0       | 0       | 0         | 0         | 0        | 0        | 0         | 0         | 0         | 0         | 0         | 0          | 0          | 0         | 0         | 0         | 0         |
| Corynebacterium        | 2              | 175            | 1       | 1       | 1         | 1         | 1        | 0        | 1         | 0         | 1         | 1         | 1         | 0          | 0          | 0         | 0         | 1         | 0         |
| Coxiella               | 2              | 54             | 0       | 0       | 0         | 1         | 1        | 0        | 0         | 0         | 0         | 0         | 0         | 0          | 0          | 0         | 0         | 0         | 0         |
| Crinalium              | 1              | 21             | 0       | 0       | 0         | 1         | 0        | 0        | 0         | 0         | 0         | 0         | 0         | 0          | 0          | 0         | 0         | 0         | 0         |
| Croceibacter           | 2              | 80             | 1       | 1       | 1         | 1         | 1        | 0        | 0         | 0         | 0         | 0         | 0         | 0          | 0          | 1         | 0         | 0         | 0         |
| Crocospaera            | 1              | 6              | 0       | 0       | 0         | 0         | 0        | 0        | 0         | 0         | 0         | 0         | 0         | 0          | 0          | 0         | 0         | 0         | 0         |
| Cronobacter            | 2              | 120            | 1       | 1       | 0         | 1         | 1        | 0        | 0         | 0         | 0         | 0         | 0         | 0          | 0          | 0         | 0         | 0         | 0         |
| Cryptobacterium        | 2              | 39             | 0       | 0       | 0         | 1         | 1        | 0        | 1         | 0         | 0         | 0         | 0         | 0          | 0          | 0         | 0         | 0         | 0         |
| Cucumis                | 1              | 9              | 0       | 0       | 0         | 0         | 0        | 0        | 0         | 0         | 0         | 0         | 0         | 0          | 0          | 0         | 0         | 0         | 0         |
| Cupriavidus            | 3              | 317            | 1       | 1       | 1         | 1         | 1        | 0        | 1         | 0         | 1         | 1         | 1         | 1          | 0          | 1         | 1         | 1         | 0         |
| Curtobacterium         | 1              | 5              | 0       | 0       | 0         | 0         | 0        | 0        | 0         | 0         | 0         | 0         | 0         | 0          | 0          | 0         | 0         | 0         | 0         |
| Curvibacter            | 1              | 27             | 0       | 0       | 0         | 1         | 0        | 0        | 1         | 0         | 0         | 0         | 0         | 0          | 0          | 0         | 0         | 0         | 0         |
| Cyanobacterium         | 1              | 9              | 0       | 0       | 0         | 0         | 0        | 0        | 0         | 0         | 0         | 0         | 0         | 0          | 0          | 0         | 0         | 0         | 0         |
| Cyanobium              | 1              | 10             | 0       | 0       | 0         | 0         | 0        | 0        | 0         | 0         | 0         | 0         | 0         | 0          | 0          | 0         | 0         | 0         | 0         |
| Cyanothece             | 1              | 34             | 0       | 0       | 0         | 0         | 0        | 0        | 0         | 0         | 0         | 0         | 0         | 0          | 0          | 0         | 0         | 0         | 0         |
| Cyclobacterium         | 1              | 19             | 0       | 0       | 0         | 0         | 0        | 0        | 0         | 0         | 0         | 0         | 0         | 0          | 0          | 0         | 0         | 0         | 0         |
| Cycloclasticus         | 1              | 21             | 0       | 0       | 0         | 0         | 0        | 0        | 0         | 0         | 0         | 0         | 0         | 0          | 0          | 0         | 0         | 0         | 0         |
| Cylindrospermopsis     | 1              | 4              | 0       | 0       | 0         | 0         | 0        | 0        | 0         | 0         | 0         | 0         | 0         | 0          | 0          | 0         | 0         | 0         | 0         |
| Cylindrospermum        | 1              | 30             | 0       | 1       | 0         | 1         | 0        | 0        | 1         | 0         | 0         | 0         | 0         | 0          | 0          | 0         | 0         | 0         | 0         |

| Genus              | Cluster Number | Protein Counts | 1.1.1.- | 1.1.1.1 | 1.1.1.157 | 1.1.1.205 | 1.1.1.35 | 1.1.1.90 | 1.12.99.6 | 1.13.11.- | 1.13.11.1 | 1.13.11.2 | 1.13.11.3 | 1.13.11.39 | 1.13.11.41 | 1.13.11.5 | 1.13.11.8 | 1.13.12.- | 1.14.11.- |
|--------------------|----------------|----------------|---------|---------|-----------|-----------|----------|----------|-----------|-----------|-----------|-----------|-----------|------------|------------|-----------|-----------|-----------|-----------|
| Cytophaga          | 2              | 69             | 1       | 1       | 1         | 1         | 1        | 0        | 0         | 0         | 0         | 0         | 0         | 0          | 0          | 0         | 0         | 0         | 0         |
| Dactylococcopsis   | 1              | 8              | 0       | 0       | 0         | 0         | 0        | 0        | 0         | 0         | 0         | 0         | 0         | 0          | 0          | 0         | 0         | 0         | 0         |
| Dechloromonas      | 1              | 40             | 0       | 0       | 0         | 0         | 0        | 0        | 0         | 0         | 0         | 0         | 0         | 0          | 0          | 0         | 0         | 0         | 0         |
| Dechlorosoma       | 1              | 19             | 0       | 0       | 0         | 0         | 0        | 0        | 0         | 0         | 0         | 0         | 0         | 0          | 0          | 0         | 0         | 0         | 0         |
| Deferribacter      | 2              | 73             | 1       | 1       | 1         | 1         | 0        | 0        | 0         | 0         | 0         | 0         | 0         | 0          | 0          | 0         | 0         | 0         | 0         |
| Dehalobacter       | 1              | 9              | 0       | 0       | 0         | 0         | 0        | 0        | 0         | 0         | 0         | 0         | 0         | 0          | 0          | 0         | 0         | 0         | 0         |
| Dehalococcoides    | 2              | 41             | 0       | 1       | 0         | 0         | 0        | 0        | 0         | 0         | 0         | 0         | 0         | 0          | 0          | 0         | 0         | 0         | 0         |
| Dehalogenimonas    | 1              | 37             | 0       | 0       | 0         | 0         | 0        | 0        | 1         | 0         | 0         | 0         | 0         | 0          | 0          | 0         | 0         | 0         | 0         |
| Deinococcus        | 2              | 140            | 1       | 1       | 1         | 1         | 1        | 0        | 0         | 0         | 0         | 0         | 1         | 0          | 0          | 0         | 0         | 0         | 0         |
| Delftia            | 3              | 177            | 1       | 1       | 1         | 1         | 1        | 0        | 0         | 0         | 1         | 1         | 0         | 0          | 0          | 0         | 1         | 1         | 0         |
| Denitrovibrio      | 2              | 67             | 1       | 0       | 0         | 1         | 0        | 0        | 0         | 0         | 0         | 0         | 0         | 0          | 0          | 0         | 0         | 0         | 0         |
| Desulfarculus      | 2              | 92             | 0       | 1       | 1         | 1         | 1        | 0        | 0         | 0         | 0         | 0         | 0         | 0          | 0          | 0         | 0         | 0         | 0         |
| Desulfatibacillum  | 3              | 84             | 1       | 1       | 1         | 1         | 1        | 0        | 1         | 0         | 0         | 0         | 0         | 0          | 0          | 0         | 0         | 0         | 0         |
| Desulfitobacterium | 2              | 102            | 0       | 1       | 1         | 1         | 1        | 0        | 1         | 0         | 0         | 0         | 0         | 0          | 0          | 0         | 0         | 0         | 0         |
| Desulfobacca       | 2              | 65             | 0       | 1       | 0         | 1         | 1        | 0        | 0         | 0         | 0         | 0         | 0         | 0          | 0          | 0         | 0         | 0         | 0         |
| Desulfobacterium   | 2              | 113            | 1       | 1       | 1         | 1         | 1        | 0        | 1         | 0         | 0         | 0         | 0         | 0          | 0          | 0         | 0         | 0         | 0         |
| Desulfobacula      | 1              | 21             | 0       | 0       | 0         | 0         | 0        | 0        | 0         | 0         | 0         | 0         | 0         | 0          | 0          | 0         | 0         | 0         | 0         |
| Desulfobulbus      | 2              | 88             | 1       | 1       | 1         | 1         | 0        | 0        | 1         | 0         | 0         | 0         | 0         | 0          | 0          | 0         | 0         | 0         | 0         |
| Desulfocapsa       | 1              | 9              | 0       | 0       | 0         | 0         | 0        | 0        | 0         | 0         | 0         | 0         | 0         | 0          | 0          | 0         | 0         | 0         | 0         |
| Desulfococcus      | 2              | 80             | 0       | 1       | 1         | 1         | 1        | 0        | 0         | 0         | 0         | 0         | 0         | 0          | 0          | 0         | 0         | 0         | 0         |
| Desulfohalobium    | 2              | 52             | 0       | 1       | 0         | 1         | 1        | 0        | 0         | 0         | 0         | 0         | 0         | 0          | 0          | 0         | 0         | 0         | 0         |
| Desulfomicrobium   | 2              | 65             | 1       | 1       | 0         | 1         | 0        | 0        | 1         | 0         | 0         | 0         | 0         | 0          | 0          | 0         | 0         | 0         | 0         |
| Desulfomonile      | 1              | 25             | 0       | 0       | 0         | 0         | 0        | 0        | 0         | 0         | 0         | 0         | 0         | 0          | 0          | 0         | 0         | 0         | 0         |
| Desulforhabdus     | 1              | 2              | 0       | 0       | 0         | 0         | 0        | 0        | 0         | 0         | 0         | 0         | 0         | 0          | 0          | 0         | 0         | 0         | 0         |
| Desulfosporosinus  | 1              | 30             | 0       | 0       | 0         | 0         | 0        | 0        | 0         | 0         | 0         | 0         | 0         | 0          | 0          | 0         | 0         | 0         | 0         |
| Desulfotalea       | 2              | 66             | 1       | 1       | 0         | 1         | 0        | 0        | 0         | 0         | 0         | 0         | 0         | 0          | 0          | 0         | 0         | 0         | 0         |
| Desulfotomaculum   | 2              | 98             | 0       | 1       | 1         | 1         | 1        | 0        | 0         | 0         | 0         | 0         | 0         | 0          | 0          | 0         | 0         | 0         | 0         |
| Desulfovibrio      | 2              | 144            | 1       | 1       | 0         | 1         | 0        | 0        | 1         | 0         | 0         | 0         | 0         | 0          | 0          | 0         | 0         | 0         | 0         |
| Desulfurispirillum | 2              | 78             | 1       | 1       | 1         | 1         | 0        | 0        | 0         | 0         | 0         | 0         | 0         | 0          | 0          | 0         | 0         | 0         | 0         |
| Desulfurivibrio    | 2              | 71             | 1       | 1       | 0         | 1         | 0        | 0        | 0         | 0         | 0         | 0         | 0         | 0          | 0          | 0         | 0         | 0         | 0         |
| Desulfurobacterium | 2              | 53             | 0       | 1       | 0         | 1         | 0        | 0        | 0         | 0         | 0         | 0         | 0         | 0          | 0          | 0         | 0         | 0         | 0         |
| Desulfurococcus    | 1              | 11             | 0       | 0       | 0         | 0         | 0        | 0        | 0         | 0         | 0         | 0         | 0         | 0          | 0          | 0         | 0         | 0         | 0         |
| Diaphorobacter     | 1              | 16             | 0       | 0       | 0         | 0         | 0        | 0        | 0         | 0         | 0         | 1         | 0         | 0          | 0          | 0         | 0         | 0         | 0         |
| Dichelobacter      | 2              | 45             | 0       | 0       | 0         | 1         | 0        | 0        | 0         | 0         | 0         | 0         | 0         | 0          | 0          | 0         | 0         | 0         | 0         |
| Dickeya            | 2              | 155            | 1       | 1       | 0         | 1         | 1        | 0        | 1         | 0         | 0         | 0         | 0         | 1          | 0          | 0         | 0         | 0         | 0         |
| Dictyoglomus       | 2              | 62             | 1       | 1       | 0         | 1         | 0        | 0        | 0         | 0         | 0         | 0         | 0         | 0          | 0          | 0         | 0         | 0         | 0         |
| Dinoroseobacter    | 3              | 148            | 1       | 1       | 1         | 1         | 1        | 0        | 0         | 0         | 1         | 0         | 1         | 0          | 0          | 1         | 0         | 0         | 0         |
| Dokdonia           | 1              | 3              | 0       | 0       | 0         | 0         | 0        | 0        | 0         | 0         | 0         | 0         | 0         | 0          | 0          | 0         | 0         | 0         | 0         |
| Dorea              | 1              | 7              | 0       | 0       | 0         | 0         | 0        | 0        | 0         | 0         | 0         | 0         | 0         | 0          | 0          | 0         | 0         | 0         | 0         |
| Dyadobacter        | 2              | 83             | 1       | 1       | 1         | 1         | 0        | 0        | 0         | 0         | 0         | 0         | 0         | 0          | 0          | 1         | 0         | 0         | 0         |
| Echinicola         | 1              | 20             | 0       | 0       | 0         | 0         | 0        | 0        | 0         | 0         | 0         | 0         | 0         | 0          | 0          | 0         | 0         | 0         | 0         |
| Edwardsiella       | 2              | 126            | 1       | 1       | 0         | 1         | 0        | 0        | 1         | 0         | 0         | 0         | 0         | 0          | 0          | 0         | 0         | 0         | 0         |
| Eggerthella        | 1              | 51             | 0       | 1       | 0         | 1         | 0        | 0        | 0         | 0         | 0         | 0         | 0         | 0          | 0          | 0         | 0         | 0         | 0         |
| Ehrlichia          | 2              | 37             | 0       | 0       | 0         | 1         | 1        | 0        | 0         | 0         | 0         | 0         | 1         | 0          | 0          | 0         | 0         | 0         | 0         |
| Eikenella          | 1              | 4              | 0       | 0       | 0         | 0         | 0        | 0        | 0         | 0         | 0         | 0         | 0         | 0          | 0          | 0         | 0         | 0         | 0         |
| Elusimicrobium     | 2              | 44             | 1       | 1       | 0         | 1         | 0        | 0        | 0         | 0         | 0         | 0         | 0         | 0          | 0          | 0         | 0         | 0         | 0         |
| Emticicia          | 1              | 21             | 0       | 0       | 0         | 0         | 0        | 0        | 0         | 0         | 0         | 0         | 0         | 0          | 0          | 0         | 0         | 0         | 0         |
| Enhydrobacter      | 1              | 1              | 1       | 0       | 0         | 0         | 0        | 0        | 0         | 0         | 0         | 0         | 0         | 0          | 0          | 0         | 0         | 0         | 0         |
| Ensifer            | 1              | 2              | 0       | 1       | 0         | 0         | 0        | 0        | 0         | 0         | 0         | 0         | 0         | 0          | 0          | 0         | 0         | 0         | 0         |
| Enterobacter       | 2              | 202            | 1       | 1       | 0         | 1         | 1        | 0        | 1         | 0         | 1         | 0         | 1         | 0          | 0          | 0         | 0         | 0         | 0         |
| Enterobacteriaceae | 2              | 211            | 1       | 1       | 0         | 1         | 1        | 0        | 1         | 0         | 1         | 0         | 1         | 0          | 0          | 0         | 1         | 0         | 0         |
| Enterococcus       | 1              | 187            | 1       | 1       | 0         | 1         | 1        | 0        | 0         | 1         | 1         | 1         | 1         | 0          | 0          | 0         | 1         | 0         | 0         |

| Genus               | Cluster Number | Protein Counts | 1.1.1.- | 1.1.1.1 | 1.1.1.157 | 1.1.1.205 | 1.1.1.35 | 1.1.1.90 | 1.12.99.6 | 1.13.11.- | 1.13.11.1 | 1.13.11.2 | 1.13.11.3 | 1.13.11.39 | 1.13.11.41 | 1.13.11.5 | 1.13.11.8 | 1.13.12.- | 1.14.11.- |
|---------------------|----------------|----------------|---------|---------|-----------|-----------|----------|----------|-----------|-----------|-----------|-----------|-----------|------------|------------|-----------|-----------|-----------|-----------|
| Enterovibrio        | 1              | 15             | 0       | 0       | 0         | 1         | 0        | 0        | 0         | 0         | 0         | 0         | 0         | 0          | 0          | 0         | 0         | 0         | 0         |
| Erwinia             | 2              | 151            | 1       | 1       | 0         | 1         | 1        | 0        | 0         | 0         | 0         | 0         | 0         | 0          | 0          | 0         | 1         | 0         | 0         |
| Erysipelothrix      | 1              | 9              | 0       | 0       | 0         | 0         | 0        | 0        | 0         | 0         | 0         | 0         | 0         | 0          | 0          | 0         | 0         | 0         | 0         |
| Erysipelotrichaceae | 1              | 4              | 0       | 0       | 0         | 0         | 0        | 0        | 0         | 0         | 0         | 0         | 0         | 0          | 0          | 0         | 0         | 0         | 0         |
| Erythrobacter       | 2              | 80             | 1       | 1       | 0         | 1         | 1        | 0        | 0         | 0         | 0         | 0         | 0         | 0          | 0          | 0         | 0         | 0         | 0         |
| Escherichia         | 2              | 242            | 1       | 1       | 1         | 1         | 1        | 0        | 1         | 1         | 1         | 0         | 1         | 0          | 0          | 0         | 1         | 0         | 0         |
| Ethanoligenens      | 2              | 69             | 1       | 1       | 0         | 1         | 0        | 0        | 0         | 0         | 0         | 0         | 0         | 0          | 0          | 0         | 0         | 0         | 0         |
| Eubacteriaceae      | 1              | 2              | 0       | 0       | 0         | 0         | 0        | 0        | 0         | 0         | 0         | 0         | 0         | 0          | 0          | 0         | 0         | 0         | 0         |
| Eubacterium         | 2              | 103            | 1       | 1       | 1         | 1         | 1        | 0        | 0         | 0         | 0         | 0         | 0         | 0          | 0          | 0         | 0         | 0         | 0         |
| Eudoraea            | 1              | 4              | 0       | 0       | 0         | 0         | 0        | 0        | 0         | 0         | 0         | 0         | 0         | 0          | 0          | 0         | 0         | 0         | 0         |
| Euryarchaeota       | 1              | 1              | 0       | 0       | 0         | 0         | 0        | 0        | 0         | 0         | 0         | 0         | 0         | 0          | 0          | 0         | 0         | 0         | 0         |
| Exiguobacterium     | 2              | 93             | 1       | 1       | 0         | 1         | 1        | 0        | 0         | 0         | 0         | 1         | 0         | 0          | 0          | 0         | 0         | 0         | 0         |
| Faecalibacterium    | 1              | 12             | 0       | 0       | 0         | 0         | 0        | 0        | 0         | 0         | 0         | 0         | 0         | 0          | 0          | 0         | 0         | 0         | 0         |
| Ferrimonas          | 2              | 115            | 1       | 1       | 0         | 1         | 1        | 0        | 1         | 0         | 0         | 0         | 0         | 0          | 0          | 1         | 0         | 0         | 0         |
| Ferroglobus         | 1              | 14             | 0       | 0       | 0         | 0         | 0        | 0        | 0         | 0         | 0         | 0         | 0         | 0          | 0          | 0         | 0         | 0         | 0         |
| Ferroplasma         | 1              | 11             | 0       | 0       | 0         | 0         | 0        | 0        | 0         | 0         | 0         | 0         | 0         | 0          | 0          | 0         | 0         | 0         | 0         |
| Fervidicoccus       | 1              | 7              | 0       | 0       | 0         | 0         | 0        | 0        | 0         | 0         | 0         | 0         | 0         | 0          | 0          | 0         | 0         | 0         | 0         |
| Fervidobacterium    | 2              | 54             | 1       | 1       | 0         | 1         | 0        | 0        | 0         | 0         | 0         | 0         | 0         | 0          | 0          | 0         | 0         | 0         | 0         |
| Fibrella            | 1              | 17             | 0       | 0       | 0         | 0         | 0        | 0        | 0         | 0         | 0         | 0         | 0         | 0          | 0          | 0         | 0         | 0         | 0         |
| Fibrobacter         | 2              | 52             | 1       | 1       | 0         | 1         | 0        | 0        | 0         | 0         | 0         | 0         | 0         | 0          | 0          | 0         | 0         | 0         | 0         |
| Filifactor          | 1              | 9              | 0       | 0       | 0         | 0         | 0        | 0        | 0         | 0         | 0         | 0         | 0         | 0          | 0          | 0         | 0         | 0         | 0         |
| Finegoldia          | 2              | 55             | 1       | 0       | 0         | 1         | 1        | 0        | 0         | 0         | 0         | 0         | 0         | 0          | 0          | 0         | 0         | 0         | 0         |
| Firmicutes          | 1              | 15             | 0       | 0       | 0         | 0         | 0        | 0        | 0         | 0         | 0         | 0         | 0         | 0          | 0          | 0         | 0         | 0         | 0         |
| Fischerella         | 1              | 15             | 0       | 0       | 0         | 1         | 0        | 0        | 0         | 0         | 0         | 0         | 0         | 0          | 0          | 0         | 0         | 0         | 0         |
| Flavobacteria       | 1              | 7              | 0       | 0       | 1         | 0         | 0        | 0        | 0         | 0         | 0         | 0         | 0         | 0          | 0          | 0         | 0         | 0         | 0         |
| Flavobacteriaceae   | 2              | 69             | 0       | 1       | 1         | 1         | 0        | 0        | 0         | 0         | 0         | 0         | 0         | 0          | 0          | 1         | 0         | 0         | 0         |
| Flavobacteriales    | 1              | 3              | 0       | 0       | 0         | 0         | 0        | 0        | 0         | 0         | 0         | 0         | 0         | 0          | 0          | 0         | 0         | 0         | 0         |
| Flavobacterium      | 2              | 103            | 1       | 1       | 1         | 1         | 1        | 0        | 1         | 0         | 0         | 0         | 0         | 0          | 0          | 1         | 0         | 0         | 0         |
| Flexibacter         | 1              | 17             | 0       | 0       | 0         | 0         | 0        | 0        | 0         | 0         | 0         | 0         | 0         | 0          | 0          | 0         | 0         | 0         | 0         |
| Flexistipes         | 1              | 11             | 0       | 0       | 0         | 0         | 0        | 0        | 0         | 0         | 0         | 0         | 0         | 0          | 0          | 0         | 0         | 0         | 0         |
| Fluoribacter        | 1              | 6              | 0       | 0       | 0         | 1         | 0        | 0        | 0         | 0         | 0         | 0         | 0         | 0          | 0          | 0         | 0         | 0         | 0         |
| Fluviicola          | 2              | 69             | 1       | 0       | 1         | 1         | 1        | 0        | 0         | 0         | 0         | 0         | 0         | 0          | 0          | 1         | 0         | 0         | 0         |
| Formosa             | 1              | 2              | 0       | 0       | 0         | 0         | 0        | 0        | 0         | 0         | 0         | 0         | 0         | 0          | 0          | 0         | 0         | 0         | 0         |
| Francisella         | 2              | 88             | 1       | 0       | 0         | 1         | 1        | 0        | 0         | 0         | 0         | 0         | 0         | 0          | 0          | 0         | 0         | 0         | 0         |
| Frankia             | 3              | 202            | 1       | 1       | 0         | 1         | 1        | 0        | 1         | 1         | 0         | 0         | 1         | 1          | 0          | 0         | 0         | 0         | 0         |
| Frateuria           | 1              | 25             | 0       | 0       | 0         | 0         | 0        | 0        | 0         | 0         | 1         | 0         | 0         | 0          | 0          | 0         | 0         | 0         | 0         |
| Fructobacillus      | 1              | 2              | 0       | 0       | 0         | 0         | 0        | 0        | 0         | 0         | 0         | 0         | 0         | 0          | 0          | 0         | 0         | 0         | 0         |
| Fulvimarina         | 1              | 2              | 0       | 0       | 0         | 0         | 0        | 0        | 0         | 0         | 0         | 0         | 0         | 0          | 0          | 0         | 0         | 0         | 0         |
| Fusobacterium       | 1              | 48             | 1       | 1       | 0         | 1         | 1        | 0        | 0         | 0         | 0         | 0         | 0         | 0          | 0          | 0         | 0         | 0         | 0         |
| Gallibacterium      | 2              | 87             | 1       | 1       | 0         | 1         | 1        | 0        | 0         | 0         | 0         | 0         | 0         | 0          | 0          | 0         | 0         | 0         | 0         |
| Gallionella         | 2              | 67             | 1       | 1       | 0         | 1         | 0        | 0        | 0         | 0         | 0         | 0         | 0         | 0          | 0          | 0         | 0         | 0         | 0         |
| Gammaproteobacteria | 1              | 9              | 1       | 0       | 0         | 0         | 0        | 0        | 0         | 0         | 0         | 0         | 0         | 0          | 0          | 0         | 0         | 0         | 0         |
| Gardnerella         | 1              | 31             | 0       | 1       | 0         | 1         | 0        | 0        | 0         | 0         | 0         | 0         | 0         | 0          | 0          | 0         | 0         | 0         | 0         |
| Geitlerinema        | 1              | 9              | 0       | 0       | 0         | 0         | 0        | 0        | 0         | 0         | 0         | 0         | 0         | 0          | 0          | 0         | 0         | 0         | 0         |
| Gemmatimonas        | 2              | 93             | 1       | 1       | 1         | 1         | 1        | 0        | 1         | 0         | 0         | 0         | 0         | 0          | 0          | 1         | 0         | 0         | 0         |
| Geobacillus         | 2              | 168            | 1       | 1       | 1         | 1         | 1        | 0        | 1         | 0         | 0         | 1         | 0         | 0          | 0          | 0         | 0         | 0         | 0         |
| Geobacter           | 2              | 150            | 1       | 1       | 1         | 1         | 1        | 0        | 1         | 0         | 0         | 0         | 0         | 0          | 0          | 0         | 0         | 0         | 0         |
| Geodermatophilus    | 2              | 136            | 1       | 1       | 1         | 1         | 1        | 0        | 0         | 0         | 1         | 0         | 1         | 1          | 0          | 1         | 0         | 0         | 0         |
| Geopsychrobacter    | 1              | 2              | 0       | 1       | 0         | 0         | 0        | 0        | 0         | 0         | 0         | 0         | 0         | 0          | 0          | 0         | 0         | 0         | 0         |
| Gillisia            | 1              | 11             | 0       | 0       | 0         | 0         | 0        | 0        | 0         | 0         | 0         | 0         | 0         | 0          | 0          | 1         | 0         | 0         | 0         |
| Gilvimarinus        | 1              | 4              | 0       | 0       | 0         | 0         | 0        | 0        | 0         | 0         | 0         | 0         | 0         | 0          | 0          | 0         | 0         | 0         | 0         |
| Glaciecola          | 2              | 117            | 1       | 1       | 1         | 1         | 0        | 0        | 0         | 0         | 0         | 0         | 0         | 0          | 0          | 0         | 1         | 0         | 0         |

| Genus             | Cluster Number | Protein Counts | 1.1.1.- | 1.1.1.1 | 1.1.1.157 | 1.1.1.205 | 1.1.1.35 | 1.1.1.90 | 1.12.99.6 | 1.13.11.- | 1.13.11.1 | 1.13.11.2 | 1.13.11.3 | 1.13.11.39 | 1.13.11.41 | 1.13.11.5 | 1.13.11.8 | 1.13.12.- | 1.14.11.- |
|-------------------|----------------|----------------|---------|---------|-----------|-----------|----------|----------|-----------|-----------|-----------|-----------|-----------|------------|------------|-----------|-----------|-----------|-----------|
| Gloeobacter       | 2              | 67             | 1       | 1       | 0         | 1         | 0        | 0        | 0         | 0         | 0         | 0         | 0         | 0          | 0          | 0         | 0         | 0         | 1         |
| Gloeocapsa        | 1              | 20             | 0       | 0       | 0         | 0         | 0        | 0        | 0         | 0         | 0         | 0         | 0         | 0          | 0          | 0         | 0         | 0         | 0         |
| Gloeotheca        | 1              | 1              | 0       | 0       | 0         | 0         | 0        | 0        | 0         | 0         | 0         | 0         | 0         | 0          | 0          | 0         | 0         | 0         | 0         |
| Gluconacetobacter | 2              | 96             | 1       | 1       | 0         | 1         | 0        | 0        | 0         | 0         | 0         | 0         | 0         | 0          | 0          | 0         | 0         | 0         | 0         |
| Gluconobacter     | 2              | 76             | 1       | 1       | 0         | 1         | 0        | 0        | 0         | 0         | 0         | 0         | 0         | 0          | 0          | 0         | 0         | 0         | 0         |
| Gordonia          | 1              | 158            | 1       | 1       | 0         | 1         | 1        | 0        | 1         | 0         | 1         | 1         | 0         | 1          | 0          | 0         | 0         | 0         | 0         |
| Gordonibacter     | 1              | 32             | 1       | 0       | 0         | 0         | 0        | 0        | 0         | 0         | 0         | 0         | 0         | 0          | 0          | 0         | 0         | 0         | 0         |
| Gramella          | 2              | 104            | 1       | 1       | 1         | 1         | 1        | 0        | 0         | 0         | 0         | 0         | 1         | 0          | 0          | 1         | 0         | 0         | 0         |
| Granulibacter     | 2              | 90             | 1       | 1       | 1         | 1         | 0        | 0        | 0         | 0         | 0         | 0         | 0         | 0          | 0          | 0         | 0         | 0         | 0         |
| Granulicella      | 2              | 98             | 1       | 1       | 0         | 1         | 1        | 0        | 0         | 0         | 0         | 0         | 0         | 0          | 0          | 0         | 0         | 0         | 0         |
| Grimontia         | 1              | 9              | 0       | 0       | 0         | 0         | 0        | 0        | 0         | 0         | 0         | 0         | 0         | 0          | 0          | 0         | 0         | 0         | 0         |
| Haemophilus       | 2              | 117            | 1       | 1       | 0         | 1         | 1        | 0        | 1         | 0         | 0         | 0         | 1         | 0          | 0          | 0         | 1         | 0         | 0         |
| Hafnia            | 1              | 29             | 0       | 1       | 0         | 1         | 0        | 0        | 0         | 0         | 0         | 0         | 0         | 0          | 0          | 0         | 0         | 0         | 0         |
| Hahella           | 3              | 130            | 1       | 1       | 0         | 1         | 1        | 0        | 0         | 0         | 0         | 0         | 1         | 0          | 0          | 1         | 0         | 0         | 0         |
| Halalkalicoccus   | 1              | 18             | 0       | 0       | 0         | 0         | 0        | 0        | 0         | 0         | 0         | 0         | 0         | 0          | 0          | 0         | 0         | 0         | 0         |
| Halanaerobium     | 2              | 89             | 1       | 1       | 0         | 1         | 1        | 0        | 0         | 0         | 0         | 0         | 0         | 0          | 0          | 0         | 0         | 0         | 0         |
| Haliangium        | 2              | 108            | 1       | 1       | 1         | 1         | 1        | 0        | 0         | 0         | 0         | 0         | 0         | 0          | 0          | 1         | 0         | 1         | 0         |
| Haliscomenobacter | 2              | 107            | 1       | 1       | 1         | 1         | 0        | 0        | 1         | 0         | 0         | 0         | 1         | 0          | 0          | 1         | 0         | 0         | 0         |
| Haloarcula        | 1              | 22             | 0       | 0       | 0         | 0         | 0        | 0        | 0         | 0         | 0         | 0         | 0         | 0          | 0          | 0         | 0         | 0         | 0         |
| Halobacillus      | 1              | 19             | 0       | 0       | 0         | 0         | 0        | 0        | 0         | 0         | 0         | 0         | 0         | 0          | 0          | 0         | 0         | 0         | 0         |
| Halobacteriaceae  | 1              | 1              | 0       | 0       | 0         | 0         | 0        | 0        | 0         | 0         | 0         | 0         | 0         | 0          | 0          | 0         | 0         | 0         | 0         |
| Halobacterium     | 1              | 10             | 0       | 0       | 0         | 0         | 0        | 0        | 0         | 0         | 0         | 0         | 0         | 0          | 0          | 0         | 0         | 0         | 0         |
| Halobacteroides   | 1              | 14             | 0       | 0       | 0         | 0         | 0        | 0        | 0         | 0         | 0         | 0         | 0         | 0          | 0          | 0         | 0         | 0         | 0         |
| Haloferax         | 1              | 20             | 0       | 0       | 0         | 0         | 0        | 0        | 0         | 0         | 0         | 0         | 0         | 0          | 0          | 0         | 0         | 0         | 0         |
| Halogeometricum   | 1              | 12             | 0       | 0       | 0         | 0         | 0        | 0        | 0         | 0         | 0         | 0         | 0         | 0          | 0          | 0         | 0         | 0         | 0         |
| Halomicrobium     | 1              | 10             | 0       | 0       | 0         | 0         | 0        | 0        | 0         | 0         | 0         | 0         | 0         | 0          | 0          | 0         | 0         | 0         | 0         |
| Halomonas         | 1              | 149            | 1       | 1       | 1         | 1         | 1        | 0        | 0         | 0         | 0         | 0         | 1         | 0          | 0          | 1         | 0         | 0         | 0         |
| Halopiger         | 1              | 16             | 0       | 0       | 0         | 0         | 0        | 0        | 0         | 0         | 0         | 0         | 0         | 0          | 0          | 0         | 0         | 0         | 0         |
| Haloquadratum     | 1              | 19             | 0       | 0       | 0         | 0         | 0        | 0        | 0         | 0         | 0         | 0         | 0         | 0          | 0          | 0         | 0         | 0         | 0         |
| Halorhabdus       | 1              | 10             | 0       | 0       | 0         | 0         | 0        | 0        | 0         | 0         | 0         | 0         | 0         | 0          | 0          | 0         | 0         | 0         | 0         |
| Halorhodospira    | 2              | 71             | 1       | 1       | 0         | 1         | 0        | 0        | 0         | 0         | 0         | 0         | 0         | 0          | 0          | 0         | 0         | 0         | 0         |
| Halorubrum        | 1              | 16             | 0       | 0       | 0         | 0         | 0        | 0        | 0         | 0         | 0         | 0         | 0         | 0          | 0          | 0         | 0         | 0         | 0         |
| Haloterrigena     | 1              | 19             | 0       | 0       | 0         | 0         | 0        | 0        | 0         | 0         | 0         | 0         | 0         | 0          | 0          | 0         | 0         | 0         | 0         |
| Halothece         | 1              | 9              | 0       | 0       | 0         | 0         | 0        | 0        | 0         | 0         | 0         | 0         | 0         | 0          | 0          | 0         | 0         | 0         | 0         |
| Halothermothrix   | 2              | 50             | 1       | 0       | 0         | 1         | 0        | 0        | 0         | 0         | 0         | 0         | 0         | 0          | 0          | 0         | 0         | 0         | 0         |
| Halothiobacillus  | 2              | 65             | 1       | 1       | 0         | 1         | 0        | 0        | 0         | 0         | 0         | 0         | 0         | 0          | 0          | 0         | 0         | 0         | 0         |
| Halovivax         | 1              | 12             | 0       | 0       | 0         | 0         | 0        | 0        | 0         | 0         | 0         | 0         | 0         | 0          | 0          | 0         | 0         | 0         | 0         |
| Helicobacter      | 2              | 79             | 1       | 1       | 0         | 1         | 1        | 0        | 1         | 0         | 0         | 0         | 0         | 1          | 0          | 0         | 0         | 0         | 0         |
| Heliobacillus     | 1              | 4              | 0       | 0       | 0         | 1         | 0        | 0        | 0         | 0         | 0         | 0         | 0         | 0          | 0          | 0         | 0         | 0         | 0         |
| Heliobacterium    | 2              | 51             | 0       | 1       | 0         | 1         | 1        | 0        | 0         | 0         | 0         | 0         | 0         | 0          | 0          | 0         | 0         | 0         | 0         |
| Herbaspirillum    | 2              | 172            | 1       | 1       | 0         | 1         | 1        | 0        | 0         | 0         | 1         | 0         | 1         | 1          | 0          | 1         | 0         | 1         | 0         |
| Herminiimonas     | 3              | 89             | 1       | 1       | 0         | 1         | 1        | 0        | 0         | 0         | 0         | 0         | 0         | 0          | 0          | 0         | 0         | 0         | 0         |
| Herpetosiphon     | 3              | 90             | 1       | 1       | 0         | 1         | 1        | 0        | 0         | 0         | 0         | 1         | 0         | 0          | 0          | 1         | 0         | 0         | 0         |
| Hippea            | 2              | 44             | 0       | 0       | 0         | 1         | 0        | 0        | 1         | 0         | 0         | 0         | 0         | 0          | 0          | 0         | 0         | 0         | 0         |
| Hirschia          | 2              | 102            | 1       | 1       | 1         | 1         | 1        | 0        | 0         | 0         | 0         | 0         | 0         | 0          | 0          | 0         | 1         | 0         | 0         |
| Histophilus       | 2              | 72             | 1       | 0       | 0         | 1         | 0        | 0        | 0         | 0         | 0         | 0         | 0         | 0          | 0          | 0         | 0         | 0         | 0         |
| Hoeflea           | 1              | 16             | 0       | 0       | 0         | 1         | 0        | 0        | 0         | 0         | 0         | 0         | 0         | 0          | 0          | 0         | 0         | 0         | 0         |
| Hydrogenivirga    | 1              | 2              | 0       | 0       | 0         | 0         | 0        | 0        | 0         | 0         | 0         | 0         | 0         | 0          | 0          | 0         | 0         | 0         | 0         |
| Hydrogenobacter   | 2              | 55             | 1       | 1       | 0         | 1         | 0        | 0        | 1         | 0         | 0         | 0         | 0         | 0          | 0          | 0         | 0         | 0         | 0         |
| Hydrogenobaculum  | 2              | 44             | 0       | 1       | 0         | 1         | 0        | 0        | 1         | 0         | 0         | 0         | 0         | 0          | 0          | 0         | 0         | 0         | 0         |
| Hydrogenophaga    | 1              | 9              | 0       | 0       | 0         | 0         | 0        | 0        | 0         | 0         | 0         | 1         | 0         | 0          | 0          | 0         | 0         | 0         | 0         |
| Hylemonella       | 1              | 4              | 0       | 0       | 0         | 0         | 0        | 0        | 0         | 0         | 0         | 0         | 0         | 0          | 0          | 0         | 0         | 0         | 0         |

| Genus                 | Cluster Number | Protein Counts | 1.1.1.- | 1.1.1.1 | 1.1.1.157 | 1.1.1.205 | 1.1.1.35 | 1.1.1.90 | 1.12.99.6 | 1.13.11.- | 1.13.11.1 | 1.13.11.2 | 1.13.11.3 | 1.13.11.39 | 1.13.11.41 | 1.13.11.5 | 1.13.11.8 | 1.13.12.- | 1.14.11.- |
|-----------------------|----------------|----------------|---------|---------|-----------|-----------|----------|----------|-----------|-----------|-----------|-----------|-----------|------------|------------|-----------|-----------|-----------|-----------|
| Hyperthermus          | 1              | 6              | 0       | 0       | 0         | 0         | 0        | 0        | 0         | 0         | 0         | 0         | 0         | 0          | 0          | 0         | 0         | 0         | 0         |
| Hyphomicrobium        | 2              | 93             | 1       | 1       | 1         | 1         | 0        | 0        | 0         | 0         | 0         | 0         | 0         | 0          | 0          | 0         | 0         | 0         | 0         |
| Hyphomonas            | 3              | 105            | 1       | 1       | 1         | 1         | 0        | 0        | 0         | 0         | 0         | 0         | 0         | 1          | 0          | 0         | 0         | 0         | 0         |
| Ideonella             | 1              | 18             | 0       | 0       | 0         | 0         | 0        | 0        | 1         | 0         | 0         | 0         | 0         | 0          | 0          | 0         | 0         | 0         | 0         |
| Idiomarina            | 2              | 86             | 1       | 1       | 0         | 1         | 1        | 0        | 0         | 0         | 0         | 0         | 0         | 0          | 0          | 1         | 0         | 0         | 0         |
| Ignavibacterium       | 1              | 14             | 0       | 0       | 0         | 0         | 0        | 0        | 0         | 0         | 0         | 0         | 0         | 0          | 0          | 0         | 0         | 0         | 0         |
| Ignicoccus            | 1              | 5              | 0       | 0       | 0         | 0         | 0        | 0        | 0         | 0         | 0         | 0         | 0         | 0          | 0          | 0         | 0         | 0         | 0         |
| Ignisphaera           | 1              | 8              | 0       | 0       | 0         | 0         | 0        | 0        | 0         | 0         | 0         | 0         | 0         | 0          | 0          | 0         | 0         | 0         | 0         |
| Ilyobacter            | 2              | 85             | 1       | 1       | 0         | 1         | 0        | 0        | 0         | 0         | 0         | 0         | 0         | 0          | 0          | 0         | 0         | 0         | 0         |
| Intrasporangium       | 2              | 114            | 1       | 1       | 0         | 1         | 1        | 0        | 0         | 0         | 0         | 1         | 0         | 0          | 0          | 1         | 0         | 0         | 0         |
| Isoptericola          | 1              | 18             | 0       | 0       | 0         | 0         | 0        | 0        | 0         | 0         | 0         | 0         | 0         | 0          | 0          | 0         | 0         | 0         | 0         |
| Isosphaera            | 2              | 75             | 1       | 1       | 1         | 1         | 0        | 0        | 0         | 0         | 0         | 0         | 1         | 0          | 0          | 0         | 0         | 0         | 0         |
| Jannaschia            | 3              | 151            | 1       | 1       | 1         | 1         | 1        | 0        | 0         | 0         | 0         | 0         | 1         | 1          | 0          | 1         | 0         | 0         | 0         |
| Janthinobacterium     | 2              | 99             | 1       | 1       | 0         | 1         | 0        | 0        | 0         | 0         | 0         | 0         | 0         | 0          | 0          | 0         | 0         | 0         | 0         |
| Jonesia               | 2              | 56             | 1       | 1       | 0         | 1         | 0        | 0        | 0         | 0         | 0         | 0         | 0         | 0          | 0          | 0         | 0         | 0         | 0         |
| Joostella             | 1              | 3              | 0       | 0       | 0         | 0         | 0        | 0        | 0         | 0         | 0         | 0         | 0         | 0          | 0          | 0         | 0         | 0         | 0         |
| Kaistia               | 1              | 2              | 0       | 0       | 0         | 0         | 0        | 0        | 0         | 0         | 0         | 0         | 0         | 0          | 0          | 0         | 0         | 0         | 0         |
| Kangiella             | 2              | 84             | 0       | 1       | 0         | 1         | 1        | 0        | 0         | 0         | 0         | 0         | 0         | 0          | 0          | 1         | 0         | 0         | 0         |
| Ketogulonicigenium    | 2              | 102            | 1       | 1       | 0         | 1         | 0        | 0        | 1         | 0         | 0         | 0         | 1         | 0          | 0          | 0         | 0         | 0         | 0         |
| Kineococcus           | 1              | 24             | 0       | 0       | 0         | 0         | 0        | 0        | 0         | 0         | 0         | 0         | 0         | 0          | 0          | 0         | 0         | 0         | 0         |
| Kinetoplastibacterium | 1              | 2              | 0       | 0       | 0         | 0         | 0        | 0        | 0         | 0         | 0         | 0         | 0         | 0          | 0          | 0         | 0         | 0         | 0         |
| Kingella              | 1              | 4              | 0       | 0       | 0         | 0         | 0        | 0        | 0         | 0         | 0         | 0         | 0         | 0          | 0          | 0         | 0         | 0         | 0         |
| Kitasatospora         | 1              | 36             | 0       | 0       | 0         | 0         | 0        | 0        | 0         | 0         | 0         | 0         | 0         | 0          | 0          | 0         | 0         | 0         | 0         |
| Klebsiella            | 3              | 222            | 1       | 1       | 1         | 1         | 1        | 0        | 0         | 1         | 1         | 0         | 1         | 0          | 0          | 0         | 1         | 0         | 0         |
| Kluyvera              | 1              | 1              | 0       | 0       | 0         | 0         | 0        | 0        | 0         | 0         | 0         | 0         | 0         | 0          | 0          | 0         | 0         | 0         | 0         |
| Kocuria               | 2              | 87             | 1       | 1       | 1         | 1         | 1        | 0        | 0         | 0         | 0         | 1         | 1         | 0          | 0          | 0         | 0         | 0         | 0         |
| Kordia                | 1              | 5              | 0       | 0       | 0         | 0         | 0        | 0        | 0         | 0         | 0         | 0         | 0         | 0          | 0          | 0         | 0         | 0         | 0         |
| Kosmotoga             | 2              | 61             | 1       | 1       | 0         | 1         | 0        | 0        | 0         | 0         | 0         | 0         | 0         | 0          | 0          | 0         | 0         | 0         | 0         |
| Kribbella             | 2              | 99             | 1       | 1       | 0         | 1         | 1        | 0        | 0         | 0         | 0         | 0         | 0         | 1          | 0          | 1         | 0         | 0         | 0         |
| Krokinobacter         | 2              | 90             | 1       | 1       | 1         | 1         | 1        | 0        | 0         | 0         | 0         | 0         | 0         | 0          | 0          | 1         | 0         | 0         | 0         |
| Kyrpidia              | 2              | 113            | 1       | 1       | 1         | 1         | 1        | 0        | 1         | 0         | 0         | 1         | 0         | 0          | 0          | 1         | 1         | 0         | 0         |
| Kytococcus            | 2              | 70             | 0       | 1       | 0         | 1         | 1        | 0        | 0         | 0         | 0         | 0         | 0         | 0          | 0          | 1         | 0         | 0         | 0         |
| Labrenzia             | 1              | 4              | 0       | 0       | 0         | 0         | 0        | 0        | 0         | 0         | 0         | 0         | 0         | 0          | 0          | 0         | 0         | 0         | 0         |
| Lachnoanaerobaculum   | 1              | 1              | 0       | 0       | 0         | 0         | 0        | 0        | 0         | 0         | 0         | 0         | 0         | 0          | 0          | 0         | 0         | 0         | 0         |
| Lachnospiraceae       | 1              | 51             | 1       | 1       | 0         | 1         | 1        | 0        | 0         | 0         | 0         | 0         | 0         | 0          | 0          | 0         | 0         | 0         | 0         |
| Lacinutrix            | 1              | 20             | 0       | 0       | 0         | 0         | 0        | 0        | 0         | 0         | 0         | 0         | 0         | 0          | 0          | 0         | 0         | 0         | 0         |
| Lactobacillus         | 2              | 119            | 1       | 1       | 0         | 1         | 1        | 0        | 0         | 0         | 0         | 0         | 0         | 0          | 0          | 0         | 0         | 0         | 0         |
| Lactococcus           | 2              | 82             | 1       | 1       | 0         | 1         | 0        | 0        | 0         | 0         | 0         | 0         | 0         | 0          | 0          | 0         | 0         | 0         | 0         |
| Lamprocystis          | 1              | 2              | 0       | 0       | 0         | 0         | 0        | 0        | 0         | 0         | 0         | 0         | 0         | 0          | 0          | 0         | 0         | 0         | 0         |
| Laribacter            | 2              | 80             | 1       | 0       | 1         | 1         | 1        | 0        | 0         | 0         | 0         | 0         | 0         | 0          | 0          | 0         | 0         | 0         | 0         |
| Lawsonia              | 2              | 33             | 0       | 0       | 0         | 1         | 0        | 0        | 1         | 0         | 0         | 0         | 0         | 0          | 0          | 0         | 0         | 0         | 0         |
| Leadbetterella        | 2              | 79             | 1       | 1       | 0         | 1         | 0        | 0        | 0         | 0         | 0         | 0         | 0         | 0          | 0          | 1         | 0         | 0         | 0         |
| Leeuwenhoekiiella     | 1              | 2              | 0       | 0       | 0         | 0         | 0        | 0        | 0         | 0         | 0         | 0         | 0         | 0          | 0          | 0         | 0         | 0         | 0         |
| Legionella            | 2              | 117            | 1       | 1       | 0         | 1         | 1        | 0        | 0         | 0         | 0         | 0         | 0         | 0          | 0          | 1         | 0         | 0         | 0         |
| Leifsonia             | 2              | 48             | 0       | 1       | 0         | 1         | 0        | 0        | 0         | 0         | 0         | 0         | 0         | 0          | 0          | 0         | 0         | 0         | 0         |
| Leptolyngbya          | 1              | 10             | 0       | 0       | 0         | 0         | 0        | 0        | 0         | 0         | 0         | 0         | 0         | 0          | 0          | 0         | 0         | 0         | 0         |
| Leptospira            | 2              | 76             | 1       | 1       | 0         | 1         | 0        | 0        | 0         | 0         | 0         | 0         | 0         | 0          | 0          | 0         | 0         | 0         | 0         |
| Leptospirillum        | 1              | 10             | 0       | 0       | 0         | 0         | 0        | 0        | 0         | 0         | 0         | 0         | 0         | 0          | 0          | 0         | 0         | 0         | 0         |
| Leptothrix            | 3              | 186            | 1       | 1       | 1         | 1         | 1        | 0        | 1         | 0         | 1         | 1         | 1         | 0          | 0          | 1         | 1         | 0         | 0         |
| Leptotrichia          | 2              | 43             | 0       | 1       | 0         | 1         | 0        | 0        | 0         | 0         | 0         | 0         | 0         | 0          | 0          | 0         | 0         | 0         | 0         |
| Leucobacter           | 1              | 2              | 0       | 0       | 0         | 0         | 0        | 0        | 0         | 0         | 0         | 0         | 0         | 0          | 0          | 0         | 1         | 0         | 0         |
| Leuconostoc           | 2              | 64             | 1       | 1       | 0         | 1         | 0        | 0        | 0         | 0         | 0         | 0         | 0         | 0          | 0          | 0         | 0         | 0         | 0         |



| Genus                | Cluster Number | Protein Counts | 1.1.1.- | 1.1.1.1 | 1.1.1.157 | 1.1.1.205 | 1.1.1.35 | 1.1.1.90 | 1.12.99.6 | 1.13.11.- | 1.13.11.1 | 1.13.11.2 | 1.13.11.3 | 1.13.11.39 | 1.13.11.41 | 1.13.11.5 | 1.13.11.8 | 1.13.12.- | 1.14.11.- |
|----------------------|----------------|----------------|---------|---------|-----------|-----------|----------|----------|-----------|-----------|-----------|-----------|-----------|------------|------------|-----------|-----------|-----------|-----------|
| Liberibacter         | 1              | 4              | 0       | 0       | 0         | 0         | 0        | 0        | 0         | 0         | 0         | 0         | 0         | 0          | 0          | 0         | 0         | 0         | 0         |
| Limnohabitans        | 1              | 11             | 0       | 0       | 0         | 0         | 0        | 0        | 0         | 0         | 0         | 0         | 0         | 0          | 0          | 0         | 1         | 0         | 0         |
| Listeria             | 2              | 77             | 1       | 1       | 0         | 1         | 0        | 0        | 0         | 0         | 0         | 0         | 0         | 0          | 0          | 0         | 0         | 0         | 0         |
| Listeriaceae         | 1              | 6              | 0       | 0       | 0         | 0         | 0        | 0        | 0         | 0         | 0         | 0         | 0         | 0          | 0          | 0         | 0         | 0         | 0         |
| Listonella           | 1              | 38             | 0       | 0       | 0         | 1         | 0        | 0        | 0         | 0         | 0         | 0         | 0         | 0          | 0          | 0         | 0         | 0         | 0         |
| Loktanella           | 1              | 3              | 0       | 0       | 0         | 0         | 0        | 0        | 0         | 0         | 0         | 0         | 0         | 0          | 0          | 0         | 0         | 0         | 0         |
| Lysinibacillus       | 2              | 97             | 1       | 1       | 1         | 1         | 1        | 0        | 0         | 0         | 0         | 0         | 0         | 0          | 0          | 0         | 0         | 0         | 0         |
| Macrococcus          | 2              | 60             | 1       | 0       | 0         | 1         | 1        | 0        | 0         | 0         | 0         | 0         | 0         | 0          | 0          | 0         | 0         | 0         | 0         |
| Magnetococcus        | 2              | 64             | 1       | 0       | 0         | 1         | 1        | 0        | 0         | 0         | 0         | 0         | 0         | 0          | 0          | 0         | 0         | 0         | 0         |
| Magnetospirillum     | 2              | 113            | 1       | 0       | 1         | 1         | 1        | 0        | 1         | 0         | 0         | 0         | 0         | 0          | 0          | 0         | 1         | 0         | 0         |
| Mahella              | 2              | 58             | 1       | 1       | 0         | 1         | 0        | 0        | 0         | 0         | 0         | 0         | 0         | 0          | 0          | 0         | 0         | 0         | 0         |
| Mannheimia           | 2              | 85             | 1       | 1       | 0         | 1         | 0        | 0        | 0         | 0         | 0         | 0         | 0         | 0          | 0          | 0         | 0         | 0         | 0         |
| Maribacter           | 3              | 87             | 1       | 0       | 1         | 1         | 0        | 0        | 0         | 0         | 0         | 0         | 0         | 0          | 0          | 1         | 0         | 0         | 0         |
| Maricaulis           | 3              | 87             | 1       | 1       | 0         | 1         | 0        | 0        | 0         | 0         | 0         | 0         | 0         | 0          | 0          | 0         | 0         | 0         | 0         |
| Marichromatium       | 1              | 2              | 0       | 0       | 0         | 0         | 0        | 0        | 0         | 0         | 0         | 0         | 0         | 0          | 0          | 0         | 0         | 0         | 0         |
| Marinithermus        | 2              | 77             | 0       | 1       | 1         | 1         | 1        | 0        | 0         | 0         | 0         | 0         | 0         | 0          | 0          | 0         | 0         | 0         | 0         |
| Marinitoga           | 1              | 15             | 0       | 0       | 0         | 0         | 0        | 0        | 0         | 0         | 0         | 0         | 0         | 0          | 0          | 0         | 0         | 0         | 0         |
| Marinobacter         | 2              | 163            | 1       | 1       | 1         | 1         | 0        | 0        | 0         | 0         | 0         | 1         | 0         | 1          | 0          | 0         | 0         | 0         | 0         |
| Marinomonas          | 3              | 192            | 1       | 1       | 0         | 1         | 1        | 0        | 0         | 0         | 1         | 0         | 0         | 0          | 0          | 1         | 1         | 0         | 0         |
| Maritimibacter       | 1              | 7              | 0       | 0       | 0         | 0         | 0        | 0        | 0         | 0         | 0         | 0         | 0         | 0          | 0          | 0         | 0         | 0         | 0         |
| Marivirga            | 2              | 96             | 1       | 1       | 1         | 1         | 1        | 0        | 0         | 0         | 0         | 0         | 0         | 0          | 0          | 1         | 0         | 0         | 0         |
| Marteella            | 1              | 3              | 1       | 0       | 0         | 0         | 0        | 0        | 0         | 0         | 0         | 0         | 0         | 0          | 0          | 0         | 0         | 0         | 0         |
| Marvinbryantia       | 1              | 1              | 0       | 0       | 0         | 0         | 0        | 0        | 0         | 0         | 0         | 0         | 0         | 0          | 0          | 0         | 0         | 0         | 0         |
| Massilia             | 1              | 4              | 0       | 0       | 0         | 0         | 0        | 0        | 0         | 0         | 0         | 0         | 0         | 0          | 0          | 0         | 0         | 0         | 0         |
| Mastigocladopsis     | 1              | 16             | 1       | 0       | 0         | 1         | 0        | 0        | 0         | 0         | 0         | 0         | 0         | 0          | 0          | 0         | 0         | 0         | 0         |
| Megamonas            | 1              | 47             | 1       | 1       | 0         | 0         | 0        | 0        | 1         | 0         | 0         | 0         | 0         | 0          | 0          | 0         | 0         | 0         | 0         |
| Megasphaera          | 1              | 14             | 0       | 0       | 0         | 0         | 0        | 0        | 0         | 0         | 0         | 0         | 0         | 0          | 0          | 0         | 0         | 0         | 0         |
| Meiothermus          | 2              | 110            | 1       | 1       | 1         | 1         | 1        | 0        | 0         | 0         | 0         | 1         | 1         | 0          | 0          | 0         | 0         | 0         | 0         |
| Melissococcus        | 2              | 46             | 1       | 1       | 0         | 1         | 0        | 0        | 0         | 0         | 0         | 0         | 0         | 0          | 0          | 0         | 0         | 0         | 0         |
| Mesoflavibacter      | 1              | 6              | 0       | 0       | 0         | 0         | 0        | 0        | 0         | 0         | 0         | 0         | 0         | 0          | 0          | 0         | 0         | 0         | 0         |
| Mesoplasma           | 1              | 23             | 0       | 0       | 0         | 1         | 0        | 0        | 0         | 0         | 0         | 0         | 0         | 0          | 0          | 0         | 0         | 0         | 0         |
| Mesorhizobium        | 2              | 201            | 1       | 1       | 1         | 1         | 1        | 0        | 1         | 0         | 1         | 0         | 1         | 0          | 0          | 1         | 0         | 0         | 0         |
| Mesotoga             | 1              | 14             | 0       | 0       | 0         | 0         | 0        | 0        | 0         | 0         | 0         | 0         | 0         | 0          | 0          | 0         | 0         | 0         | 0         |
| Metallosphaera       | 1              | 18             | 0       | 0       | 0         | 0         | 0        | 0        | 0         | 0         | 0         | 0         | 0         | 0          | 0          | 0         | 0         | 0         | 0         |
| Methanobacterium     | 1              | 7              | 0       | 0       | 0         | 0         | 0        | 0        | 0         | 0         | 0         | 0         | 0         | 0          | 0          | 0         | 0         | 0         | 0         |
| Methanobrevibacter   | 1              | 9              | 0       | 0       | 0         | 0         | 0        | 0        | 0         | 0         | 0         | 0         | 0         | 0          | 0          | 0         | 0         | 0         | 0         |
| Methanocaldococcus   | 1              | 6              | 0       | 0       | 0         | 0         | 0        | 0        | 0         | 0         | 0         | 0         | 0         | 0          | 0          | 0         | 0         | 0         | 0         |
| Methanocella         | 1              | 15             | 0       | 0       | 0         | 0         | 0        | 0        | 0         | 0         | 0         | 0         | 0         | 0          | 0          | 0         | 0         | 0         | 0         |
| Methanococcaceae     | 1              | 1              | 0       | 0       | 0         | 0         | 0        | 0        | 0         | 0         | 0         | 0         | 0         | 0          | 0          | 0         | 0         | 0         | 0         |
| Methanococcoides     | 1              | 5              | 0       | 0       | 0         | 0         | 0        | 0        | 0         | 0         | 0         | 0         | 0         | 0          | 0          | 0         | 0         | 0         | 0         |
| Methanococcus        | 1              | 9              | 0       | 0       | 0         | 0         | 0        | 0        | 0         | 0         | 0         | 0         | 0         | 0          | 0          | 0         | 0         | 0         | 0         |
| Methanocorpusculum   | 1              | 7              | 0       | 0       | 0         | 0         | 0        | 0        | 0         | 0         | 0         | 0         | 0         | 0          | 0          | 0         | 0         | 0         | 0         |
| Methanoculleus       | 1              | 8              | 0       | 0       | 0         | 0         | 0        | 0        | 0         | 0         | 0         | 0         | 0         | 0          | 0          | 0         | 0         | 0         | 0         |
| Methanohalobium      | 1              | 5              | 0       | 0       | 0         | 0         | 0        | 0        | 0         | 0         | 0         | 0         | 0         | 0          | 0          | 0         | 0         | 0         | 0         |
| Methanohalophilus    | 1              | 5              | 0       | 0       | 0         | 0         | 0        | 0        | 0         | 0         | 0         | 0         | 0         | 0          | 0          | 0         | 0         | 0         | 0         |
| Methanolobus         | 1              | 5              | 0       | 0       | 0         | 0         | 0        | 0        | 0         | 0         | 0         | 0         | 0         | 0          | 0          | 0         | 0         | 0         | 0         |
| Methanomethylovorans | 1              | 5              | 0       | 0       | 0         | 0         | 0        | 0        | 0         | 0         | 0         | 0         | 0         | 0          | 0          | 0         | 0         | 0         | 0         |
| Methanoplanus        | 1              | 7              | 0       | 0       | 0         | 0         | 0        | 0        | 0         | 0         | 0         | 0         | 0         | 0          | 0          | 0         | 0         | 0         | 0         |
| Methanopyrus         | 1              | 4              | 0       | 0       | 0         | 0         | 0        | 0        | 0         | 0         | 0         | 0         | 0         | 0          | 0          | 0         | 0         | 0         | 0         |
| Methanoregula        | 1              | 8              | 0       | 0       | 0         | 0         | 0        | 0        | 0         | 0         | 0         | 0         | 0         | 0          | 0          | 0         | 0         | 0         | 0         |
| Methanosaeta         | 1              | 9              | 0       | 0       | 0         | 0         | 0        | 0        | 0         | 0         | 0         | 0         | 0         | 0          | 0          | 0         | 0         | 0         | 0         |
| Methanosalsum        | 1              | 7              | 0       | 0       | 0         | 0         | 0        | 0        | 0         | 0         | 0         | 0         | 0         | 0          | 0          | 0         | 0         | 0         | 0         |

| Genus               | Cluster Number | Protein Counts | 1.1.1.- | 1.1.1.1 | 1.1.1.157 | 1.1.1.205 | 1.1.1.35 | 1.1.1.90 | 1.12.99.6 | 1.13.11.- | 1.13.11.1 | 1.13.11.2 | 1.13.11.3 | 1.13.11.39 | 1.13.11.41 | 1.13.11.5 | 1.13.11.8 | 1.13.12.- | 1.14.11.- |
|---------------------|----------------|----------------|---------|---------|-----------|-----------|----------|----------|-----------|-----------|-----------|-----------|-----------|------------|------------|-----------|-----------|-----------|-----------|
| Methanosarcina      | 1              | 18             | 0       | 0       | 0         | 0         | 0        | 0        | 0         | 0         | 0         | 0         | 0         | 0          | 0          | 0         | 0         | 0         | 0         |
| Methanosphaera      | 1              | 7              | 0       | 0       | 0         | 0         | 0        | 0        | 0         | 0         | 0         | 0         | 0         | 0          | 0          | 0         | 0         | 0         | 0         |
| Methanosphaerula    | 1              | 8              | 0       | 0       | 0         | 0         | 0        | 0        | 0         | 0         | 0         | 0         | 0         | 0          | 0          | 0         | 0         | 0         | 0         |
| Methanospirillum    | 1              | 6              | 0       | 0       | 0         | 0         | 0        | 0        | 0         | 0         | 0         | 0         | 0         | 0          | 0          | 0         | 0         | 0         | 0         |
| Methanothermobacter | 1              | 6              | 0       | 0       | 0         | 0         | 0        | 0        | 0         | 0         | 0         | 0         | 0         | 0          | 0          | 0         | 0         | 0         | 0         |
| Methanothermococcus | 1              | 5              | 0       | 0       | 0         | 0         | 0        | 0        | 0         | 0         | 0         | 0         | 0         | 0          | 0          | 0         | 0         | 0         | 0         |
| Methanothermus      | 1              | 5              | 0       | 0       | 0         | 0         | 0        | 0        | 0         | 0         | 0         | 0         | 0         | 0          | 0          | 0         | 0         | 0         | 0         |
| Methanotorris       | 1              | 5              | 0       | 0       | 0         | 0         | 0        | 0        | 0         | 0         | 0         | 0         | 0         | 0          | 0          | 0         | 0         | 0         | 0         |
| Methylacidiphilum   | 2              | 48             | 0       | 1       | 0         | 1         | 0        | 0        | 1         | 0         | 0         | 0         | 0         | 0          | 0          | 0         | 0         | 0         | 0         |
| Methylarcula        | 1              | 2              | 0       | 0       | 0         | 0         | 0        | 0        | 0         | 0         | 0         | 0         | 0         | 0          | 0          | 0         | 0         | 0         | 0         |
| Methylibium         | 1              | 38             | 0       | 0       | 0         | 0         | 0        | 0        | 1         | 0         | 0         | 0         | 0         | 0          | 0          | 0         | 0         | 0         | 0         |
| Methylobacillus     | 2              | 61             | 1       | 1       | 0         | 1         | 0        | 0        | 0         | 0         | 0         | 0         | 0         | 0          | 0          | 0         | 0         | 0         | 0         |
| Methylobacterium    | 3              | 236            | 1       | 1       | 1         | 1         | 1        | 0        | 0         | 0         | 1         | 0         | 1         | 1          | 0          | 1         | 0         | 1         | 0         |
| Methylocella        | 3              | 117            | 1       | 1       | 0         | 1         | 1        | 0        | 1         | 0         | 0         | 1         | 0         | 0          | 0          | 0         | 0         | 0         | 0         |
| Methylococcus       | 2              | 80             | 1       | 1       | 0         | 1         | 0        | 0        | 1         | 0         | 0         | 0         | 0         | 0          | 0          | 0         | 0         | 0         | 0         |
| Methylocystis       | 1              | 21             | 0       | 0       | 0         | 0         | 0        | 0        | 0         | 0         | 0         | 0         | 0         | 0          | 0          | 0         | 0         | 0         | 0         |
| Methyloferula       | 1              | 2              | 0       | 0       | 0         | 0         | 0        | 0        | 0         | 0         | 0         | 0         | 0         | 0          | 0          | 0         | 0         | 0         | 0         |
| Methylomicrobium    | 1              | 12             | 0       | 0       | 0         | 0         | 0        | 0        | 0         | 0         | 0         | 0         | 0         | 0          | 0          | 0         | 0         | 0         | 0         |
| Methylomonas        | 1              | 15             | 0       | 0       | 0         | 0         | 0        | 0        | 0         | 0         | 0         | 0         | 0         | 0          | 0          | 0         | 0         | 0         | 0         |
| Methylophaga        | 1              | 7              | 0       | 0       | 0         | 0         | 0        | 0        | 0         | 0         | 0         | 0         | 0         | 0          | 0          | 0         | 0         | 0         | 0         |
| Methylophilus       | 1              | 2              | 0       | 0       | 0         | 0         | 0        | 0        | 0         | 0         | 0         | 0         | 0         | 0          | 0          | 0         | 0         | 0         | 0         |
| Methylosinus        | 1              | 2              | 0       | 0       | 0         | 0         | 0        | 0        | 0         | 0         | 0         | 0         | 0         | 0          | 0          | 0         | 0         | 0         | 0         |
| Methylotenera       | 2              | 72             | 1       | 1       | 0         | 1         | 0        | 0        | 0         | 0         | 0         | 0         | 0         | 0          | 0          | 0         | 0         | 0         | 0         |
| Methyloversatilis   | 1              | 5              | 0       | 0       | 0         | 0         | 0        | 0        | 1         | 0         | 0         | 0         | 0         | 0          | 0          | 0         | 0         | 0         | 0         |
| Methylovorus        | 2              | 66             | 1       | 1       | 0         | 1         | 0        | 0        | 0         | 0         | 0         | 0         | 0         | 0          | 0          | 0         | 0         | 0         | 0         |
| Micavibrio          | 1              | 9              | 0       | 0       | 0         | 0         | 0        | 0        | 0         | 0         | 0         | 0         | 0         | 0          | 0          | 0         | 0         | 0         | 0         |
| Microbacterium      | 2              | 115            | 1       | 1       | 1         | 1         | 0        | 0        | 0         | 0         | 0         | 1         | 1         | 0          | 0          | 0         | 1         | 0         | 0         |
| Microchaete         | 1              | 23             | 0       | 0       | 0         | 1         | 0        | 0        | 1         | 0         | 0         | 0         | 0         | 0          | 0          | 0         | 0         | 0         | 0         |
| Micrococcus         | 2              | 72             | 1       | 1       | 1         | 1         | 1        | 0        | 0         | 0         | 0         | 1         | 0         | 0          | 0          | 0         | 0         | 0         | 0         |
| Microcoleus         | 1              | 17             | 0       | 0       | 0         | 0         | 0        | 0        | 0         | 0         | 0         | 0         | 0         | 0          | 0          | 0         | 0         | 0         | 0         |
| Microcystis         | 2              | 67             | 1       | 1       | 0         | 1         | 0        | 0        | 0         | 0         | 0         | 0         | 0         | 0          | 0          | 0         | 0         | 0         | 0         |
| Microlunatus        | 1              | 25             | 0       | 0       | 0         | 0         | 0        | 0        | 0         | 0         | 0         | 0         | 0         | 0          | 0          | 0         | 0         | 0         | 0         |
| Micromonospora      | 2              | 115            | 1       | 1       | 1         | 1         | 1        | 0        | 0         | 0         | 0         | 0         | 0         | 1          | 0          | 1         | 0         | 0         | 0         |
| Microvirga          | 1              | 6              | 0       | 0       | 0         | 0         | 0        | 0        | 0         | 0         | 0         | 0         | 0         | 0          | 0          | 1         | 0         | 0         | 0         |
| Mobiluncus          | 1              | 41             | 0       | 1       | 0         | 1         | 0        | 0        | 1         | 0         | 0         | 0         | 0         | 0          | 0          | 0         | 0         | 0         | 0         |
| Modestobacter       | 1              | 43             | 0       | 0       | 0         | 0         | 0        | 0        | 0         | 0         | 0         | 0         | 0         | 0          | 0          | 0         | 0         | 0         | 0         |
| Moorea              | 1              | 2              | 0       | 0       | 0         | 0         | 0        | 0        | 0         | 0         | 0         | 0         | 0         | 0          | 0          | 0         | 0         | 0         | 0         |
| Moorella            | 2              | 69             | 0       | 1       | 0         | 1         | 0        | 0        | 0         | 0         | 0         | 0         | 0         | 0          | 0          | 0         | 0         | 0         | 0         |
| Moraxella           | 2              | 66             | 1       | 0       | 0         | 1         | 0        | 0        | 0         | 0         | 0         | 0         | 0         | 0          | 0          | 0         | 0         | 0         | 0         |
| Morganella          | 1              | 29             | 0       | 0       | 0         | 1         | 0        | 0        | 0         | 0         | 0         | 0         | 0         | 0          | 0          | 0         | 0         | 0         | 0         |
| Moritella           | 1              | 2              | 0       | 0       | 0         | 0         | 0        | 0        | 0         | 0         | 0         | 0         | 0         | 0          | 0          | 0         | 0         | 0         | 0         |
| Muricauda           | 1              | 23             | 0       | 0       | 0         | 0         | 0        | 0        | 0         | 0         | 0         | 0         | 0         | 0          | 0          | 0         | 0         | 0         | 0         |
| Mycobacterium       | 3              | 306            | 1       | 1       | 1         | 1         | 1        | 0        | 1         | 1         | 1         | 1         | 1         | 1          | 0          | 1         | 1         | 1         | 0         |
| Mycoplasma          | 1              | 53             | 1       | 1       | 0         | 1         | 0        | 0        | 0         | 0         | 0         | 0         | 0         | 0          | 0          | 0         | 0         | 0         | 0         |
| Myxococcus          | 2              | 110            | 1       | 1       | 1         | 1         | 1        | 0        | 0         | 0         | 0         | 0         | 0         | 0          | 0          | 1         | 0         | 0         | 0         |
| Nakamurella         | 2              | 115            | 1       | 1       | 0         | 1         | 1        | 0        | 0         | 0         | 0         | 0         | 0         | 1          | 0          | 1         | 0         | 0         | 0         |
| napthalene          | 1              | 2              | 0       | 0       | 0         | 0         | 0        | 0        | 0         | 0         | 0         | 0         | 0         | 0          | 0          | 0         | 0         | 0         | 0         |
| Natranaerobius      | 2              | 55             | 0       | 1       | 1         | 1         | 1        | 0        | 0         | 0         | 0         | 0         | 0         | 0          | 0          | 0         | 0         | 0         | 0         |
| Natrialba           | 1              | 16             | 0       | 0       | 0         | 0         | 0        | 0        | 0         | 0         | 0         | 0         | 0         | 0          | 0          | 0         | 0         | 0         | 0         |
| Natrinema           | 1              | 16             | 0       | 0       | 0         | 0         | 0        | 0        | 0         | 0         | 0         | 0         | 0         | 0          | 0          | 0         | 0         | 0         | 0         |
| Natronobacterium    | 1              | 11             | 0       | 0       | 0         | 0         | 0        | 0        | 0         | 0         | 0         | 0         | 0         | 0          | 0          | 0         | 0         | 0         | 0         |
| Natronococcus       | 1              | 21             | 0       | 0       | 0         | 0         | 0        | 0        | 0         | 0         | 0         | 0         | 0         | 0          | 0          | 0         | 0         | 0         | 0         |

| Genus             | Cluster Number | Protein Counts | 1.1.1.- | 1.1.1.1 | 1.1.1.157 | 1.1.1.205 | 1.1.1.35 | 1.1.1.90 | 1.12.99.6 | 1.13.11.- | 1.13.11.1 | 1.13.11.2 | 1.13.11.3 | 1.13.11.39 | 1.13.11.41 | 1.13.11.5 | 1.13.11.8 | 1.13.12.- | 1.14.11.- |
|-------------------|----------------|----------------|---------|---------|-----------|-----------|----------|----------|-----------|-----------|-----------|-----------|-----------|------------|------------|-----------|-----------|-----------|-----------|
| Natronomonas      | 1              | 20             | 0       | 0       | 0         | 0         | 0        | 0        | 0         | 0         | 0         | 0         | 0         | 0          | 0          | 0         | 0         | 0         | 0         |
| Nautilia          | 2              | 48             | 1       | 0       | 0         | 1         | 0        | 0        | 1         | 0         | 0         | 0         | 0         | 0          | 0          | 0         | 0         | 0         | 0         |
| Neisseria         | 2              | 67             | 1       | 1       | 0         | 1         | 0        | 0        | 0         | 0         | 0         | 0         | 0         | 0          | 0          | 0         | 0         | 0         | 0         |
| Neisseriaceae     | 1              | 1              | 0       | 0       | 0         | 0         | 0        | 0        | 0         | 0         | 0         | 0         | 0         | 0          | 0          | 0         | 0         | 0         | 0         |
| Neorickettsia     | 1              | 31             | 0       | 0       | 0         | 1         | 0        | 0        | 0         | 0         | 0         | 0         | 0         | 0          | 0          | 0         | 0         | 0         | 0         |
| Neptuniibacter    | 1              | 2              | 0       | 0       | 0         | 0         | 0        | 0        | 0         | 0         | 0         | 0         | 0         | 0          | 0          | 0         | 0         | 0         | 0         |
| Niastella         | 1              | 21             | 0       | 0       | 0         | 0         | 0        | 0        | 0         | 0         | 0         | 0         | 0         | 0          | 0          | 0         | 0         | 0         | 0         |
| Nitratifractor    | 2              | 54             | 1       | 1       | 0         | 1         | 0        | 0        | 0         | 0         | 0         | 0         | 0         | 0          | 0          | 0         | 0         | 0         | 0         |
| Nitratireductor   | 1              | 19             | 0       | 1       | 0         | 0         | 0        | 0        | 0         | 0         | 0         | 0         | 0         | 0          | 0          | 0         | 0         | 0         | 0         |
| Nitratiruptor     | 2              | 40             | 0       | 0       | 0         | 1         | 0        | 0        | 1         | 0         | 0         | 0         | 0         | 0          | 0          | 0         | 0         | 0         | 0         |
| Nitrobacter       | 2              | 99             | 0       | 1       | 1         | 1         | 1        | 0        | 0         | 0         | 0         | 0         | 0         | 0          | 0          | 1         | 0         | 0         | 0         |
| Nitrococcus       | 1              | 2              | 0       | 0       | 0         | 0         | 0        | 0        | 0         | 0         | 0         | 0         | 0         | 0          | 0          | 0         | 0         | 0         | 0         |
| Nitrosococcus     | 2              | 94             | 1       | 1       | 0         | 1         | 1        | 0        | 0         | 0         | 1         | 0         | 0         | 0          | 0          | 1         | 0         | 0         | 0         |
| Nitrosomonas      | 2              | 72             | 1       | 1       | 0         | 1         | 0        | 0        | 0         | 0         | 0         | 0         | 0         | 0          | 0          | 0         | 0         | 0         | 0         |
| Nitrosopumilaceae | 1              | 7              | 0       | 0       | 0         | 0         | 0        | 0        | 0         | 0         | 0         | 0         | 0         | 0          | 0          | 0         | 0         | 0         | 0         |
| Nitrosopumilus    | 1              | 11             | 0       | 0       | 0         | 0         | 0        | 0        | 0         | 0         | 0         | 0         | 0         | 0          | 0          | 0         | 0         | 0         | 0         |
| Nitrospira        | 2              | 74             | 1       | 1       | 0         | 1         | 0        | 0        | 0         | 0         | 1         | 0         | 0         | 0          | 0          | 0         | 0         | 1         | 0         |
| Nocardia          | 2              | 185            | 1       | 1       | 1         | 1         | 1        | 0        | 1         | 0         | 1         | 1         | 0         | 1          | 0          | 1         | 0         | 0         | 0         |
| Nocardioidaceae   | 1              | 2              | 0       | 0       | 0         | 0         | 0        | 0        | 0         | 0         | 0         | 0         | 0         | 0          | 0          | 0         | 0         | 0         | 0         |
| Nocardioides      | 2              | 157            | 1       | 1       | 1         | 1         | 1        | 0        | 0         | 0         | 1         | 1         | 0         | 1          | 0          | 1         | 0         | 0         | 0         |
| Nocardiopsis      | 2              | 102            | 1       | 1       | 0         | 1         | 1        | 0        | 0         | 0         | 0         | 0         | 0         | 0          | 0          | 1         | 0         | 0         | 0         |
| Nodularia         | 1              | 22             | 0       | 0       | 0         | 1         | 0        | 0        | 1         | 0         | 0         | 0         | 0         | 0          | 0          | 0         | 0         | 0         | 0         |
| Nonlabens         | 1              | 19             | 0       | 0       | 0         | 0         | 0        | 0        | 0         | 0         | 0         | 0         | 0         | 0          | 0          | 0         | 0         | 0         | 0         |
| Nostoc            | 2              | 111            | 1       | 1       | 0         | 1         | 1        | 0        | 1         | 0         | 0         | 0         | 0         | 0          | 0          | 0         | 0         | 0         | 0         |
| Nostocaceae       | 1              | 2              | 0       | 0       | 0         | 0         | 0        | 0        | 0         | 0         | 0         | 0         | 0         | 0          | 0          | 0         | 0         | 0         | 0         |
| Novosphingobium   | 2              | 169            | 1       | 1       | 1         | 1         | 1        | 0        | 1         | 0         | 1         | 0         | 0         | 0          | 0          | 0         | 1         | 0         | 0         |
| Oceanibaculum     | 1              | 3              | 0       | 0       | 0         | 0         | 0        | 0        | 0         | 0         | 0         | 0         | 0         | 0          | 0          | 0         | 0         | 0         | 0         |
| Oceanibulbus      | 1              | 12             | 0       | 0       | 0         | 0         | 0        | 0        | 0         | 0         | 0         | 0         | 0         | 0          | 0          | 0         | 0         | 0         | 0         |
| Oceanicola        | 1              | 9              | 0       | 0       | 0         | 0         | 0        | 0        | 0         | 0         | 0         | 0         | 0         | 0          | 0          | 0         | 0         | 0         | 0         |
| Oceanimonas       | 1              | 33             | 0       | 0       | 0         | 0         | 0        | 0        | 0         | 0         | 0         | 0         | 0         | 0          | 0          | 0         | 0         | 0         | 0         |
| Oceaniovalibus    | 1              | 2              | 0       | 0       | 0         | 0         | 0        | 0        | 0         | 0         | 0         | 0         | 0         | 0          | 0          | 0         | 0         | 0         | 0         |
| Oceanithermus     | 2              | 72             | 1       | 1       | 1         | 1         | 0        | 0        | 0         | 0         | 0         | 0         | 0         | 0          | 0          | 0         | 0         | 0         | 0         |
| Oceanobacillus    | 2              | 91             | 1       | 1       | 1         | 1         | 1        | 0        | 0         | 0         | 0         | 0         | 0         | 0          | 0          | 0         | 0         | 0         | 0         |
| Oceanospirillum   | 1              | 2              | 0       | 0       | 0         | 0         | 0        | 0        | 0         | 0         | 0         | 0         | 0         | 0          | 0          | 0         | 0         | 0         | 0         |
| Ochrobactrum      | 2              | 133            | 1       | 1       | 1         | 1         | 1        | 0        | 0         | 0         | 0         | 0         | 1         | 0          | 0          | 0         | 0         | 0         | 1         |
| Octadecabacter    | 1              | 29             | 0       | 0       | 0         | 0         | 0        | 0        | 0         | 0         | 0         | 0         | 0         | 0          | 0          | 0         | 0         | 0         | 0         |
| Oenococcus        | 2              | 41             | 1       | 1       | 0         | 1         | 0        | 0        | 0         | 0         | 0         | 0         | 0         | 0          | 0          | 0         | 0         | 0         | 0         |
| Oleomonas         | 1              | 2              | 0       | 0       | 0         | 0         | 0        | 0        | 0         | 0         | 0         | 0         | 0         | 0          | 0          | 0         | 0         | 0         | 0         |
| Oligotropha       | 3              | 87             | 1       | 1       | 1         | 1         | 1        | 0        | 0         | 0         | 0         | 0         | 0         | 0          | 0          | 0         | 0         | 0         | 0         |
| Olsenella         | 2              | 40             | 1       | 1       | 0         | 1         | 1        | 0        | 0         | 0         | 0         | 0         | 0         | 0          | 0          | 0         | 0         | 0         | 0         |
| Opitutus          | 2              | 67             | 1       | 1       | 0         | 1         | 0        | 0        | 0         | 0         | 0         | 0         | 0         | 1          | 0          | 0         | 0         | 0         | 0         |
| Orientia          | 1              | 21             | 0       | 0       | 0         | 0         | 0        | 0        | 0         | 0         | 0         | 0         | 0         | 0          | 0          | 0         | 0         | 0         | 0         |
| Ornithobacterium  | 1              | 11             | 0       | 0       | 0         | 0         | 0        | 0        | 0         | 0         | 0         | 0         | 0         | 0          | 0          | 0         | 0         | 0         | 0         |
| Oscillatoria      | 1              | 16             | 0       | 0       | 0         | 0         | 0        | 0        | 0         | 0         | 0         | 0         | 0         | 0          | 0          | 0         | 0         | 0         | 0         |
| Oscillatoriales   | 1              | 2              | 0       | 0       | 0         | 0         | 0        | 0        | 0         | 0         | 0         | 0         | 0         | 0          | 0          | 0         | 0         | 0         | 0         |
| Oscillibacter     | 1              | 20             | 0       | 0       | 0         | 0         | 0        | 0        | 0         | 0         | 0         | 0         | 0         | 0          | 0          | 0         | 0         | 0         | 0         |
| Owenweeksia       | 1              | 15             | 0       | 0       | 0         | 0         | 0        | 0        | 0         | 0         | 0         | 0         | 0         | 0          | 0          | 0         | 0         | 0         | 0         |
| Oxalobacteraceae  | 1              | 4              | 0       | 0       | 0         | 0         | 0        | 0        | 0         | 0         | 0         | 0         | 0         | 0          | 0          | 0         | 0         | 0         | 0         |
| Paenibacillus     | 2              | 152            | 1       | 1       | 1         | 1         | 1        | 0        | 0         | 0         | 0         | 0         | 0         | 0          | 0          | 0         | 0         | 0         | 0         |
| Paludibacter      | 2              | 67             | 1       | 1       | 0         | 1         | 0        | 0        | 1         | 0         | 0         | 0         | 0         | 0          | 0          | 0         | 0         | 0         | 0         |
| Pandoraea         | 1              | 18             | 0       | 0       | 0         | 0         | 0        | 0        | 0         | 0         | 0         | 0         | 0         | 0          | 0          | 0         | 0         | 0         | 0         |
| Pannonibacter     | 1              | 3              | 0       | 0       | 0         | 0         | 0        | 0        | 0         | 0         | 0         | 0         | 0         | 0          | 0          | 0         | 0         | 0         | 0         |

| Genus              | Cluster Number | Protein Counts | 1.1.1.- | 1.1.1.1 | 1.1.1.157 | 1.1.1.205 | 1.1.1.35 | 1.1.1.90 | 1.12.99.6 | 1.13.11.- | 1.13.11.1 | 1.13.11.2 | 1.13.11.3 | 1.13.11.39 | 1.13.11.41 | 1.13.11.5 | 1.13.11.8 | 1.13.12.- | 1.14.11.- |
|--------------------|----------------|----------------|---------|---------|-----------|-----------|----------|----------|-----------|-----------|-----------|-----------|-----------|------------|------------|-----------|-----------|-----------|-----------|
| Pantholops         | 1              | 23             | 1       | 1       | 0         | 1         | 0        | 0        | 0         | 0         | 0         | 0         | 0         | 0          | 0          | 0         | 0         | 0         | 0         |
| Pantoea            | 2              | 181            | 1       | 1       | 0         | 1         | 1        | 0        | 0         | 0         | 0         | 1         | 1         | 0          | 0          | 0         | 0         | 0         | 0         |
| Parabacteroides    | 2              | 64             | 1       | 0       | 0         | 1         | 0        | 0        | 1         | 0         | 0         | 0         | 0         | 0          | 0          | 0         | 0         | 0         | 0         |
| Parachlamydia      | 1              | 11             | 0       | 0       | 0         | 0         | 0        | 0        | 0         | 0         | 0         | 0         | 0         | 0          | 0          | 0         | 0         | 0         | 0         |
| Paracoccus         | 2              | 169            | 1       | 1       | 1         | 1         | 1        | 0        | 1         | 0         | 1         | 0         | 1         | 0          | 0          | 1         | 0         | 0         | 0         |
| Parvibaculum       | 3              | 117            | 1       | 1       | 1         | 1         | 1        | 0        | 0         | 0         | 0         | 0         | 0         | 1          | 0          | 0         | 0         | 0         | 0         |
| Parvularcula       | 2              | 72             | 1       | 1       | 1         | 1         | 1        | 0        | 0         | 0         | 0         | 0         | 0         | 0          | 0          | 0         | 0         | 0         | 0         |
| Pasteurella        | 2              | 85             | 1       | 0       | 0         | 1         | 0        | 0        | 0         | 0         | 0         | 0         | 0         | 0          | 0          | 0         | 0         | 0         | 0         |
| Pasteurellaceae    | 1              | 2              | 0       | 0       | 0         | 0         | 0        | 0        | 0         | 0         | 0         | 0         | 0         | 0          | 0          | 0         | 0         | 0         | 0         |
| Pectobacterium     | 1              | 44             | 0       | 1       | 0         | 1         | 0        | 0        | 0         | 0         | 0         | 0         | 0         | 0          | 0          | 0         | 0         | 0         | 0         |
| Pediococcus        | 1              | 43             | 1       | 1       | 0         | 1         | 0        | 0        | 0         | 0         | 0         | 0         | 0         | 0          | 0          | 0         | 0         | 0         | 0         |
| Pedobacter         | 2              | 88             | 1       | 1       | 1         | 1         | 1        | 0        | 0         | 0         | 0         | 0         | 0         | 0          | 0          | 1         | 0         | 0         | 0         |
| Pelagibaca         | 1              | 10             | 0       | 0       | 0         | 0         | 0        | 0        | 0         | 0         | 0         | 0         | 0         | 0          | 0          | 0         | 0         | 0         | 0         |
| Pelagibacterium    | 1              | 39             | 0       | 0       | 0         | 0         | 0        | 0        | 0         | 0         | 0         | 0         | 0         | 0          | 0          | 0         | 0         | 0         | 0         |
| Pelobacter         | 2              | 85             | 1       | 1       | 1         | 1         | 0        | 0        | 0         | 0         | 0         | 0         | 0         | 0          | 0          | 0         | 0         | 0         | 0         |
| Pelodictyon        | 2              | 62             | 1       | 1       | 0         | 1         | 0        | 0        | 1         | 0         | 0         | 0         | 0         | 0          | 0          | 0         | 0         | 0         | 0         |
| Pelosinus          | 1              | 1              | 0       | 0       | 0         | 0         | 0        | 0        | 0         | 0         | 0         | 0         | 0         | 0          | 0          | 0         | 0         | 0         | 0         |
| Pelotomaculum      | 2              | 60             | 0       | 1       | 1         | 1         | 0        | 0        | 0         | 0         | 0         | 0         | 0         | 0          | 0          | 0         | 0         | 0         | 0         |
| Peptostreptococcus | 1              | 1              | 0       | 0       | 0         | 0         | 0        | 0        | 0         | 0         | 0         | 0         | 0         | 0          | 0          | 0         | 0         | 0         | 0         |
| Persephonella      | 2              | 55             | 0       | 1       | 0         | 1         | 0        | 0        | 1         | 0         | 0         | 0         | 0         | 0          | 0          | 0         | 0         | 0         | 0         |
| Petrotoga          | 2              | 72             | 1       | 1       | 0         | 1         | 0        | 0        | 0         | 0         | 0         | 0         | 0         | 0          | 0          | 0         | 0         | 0         | 0         |
| Phaeobacter        | 2              | 55             | 0       | 1       | 0         | 1         | 0        | 0        | 0         | 0         | 0         | 0         | 0         | 0          | 0          | 1         | 0         | 0         | 0         |
| Phenylobacterium   | 3              | 103            | 1       | 1       | 1         | 1         | 0        | 0        | 0         | 0         | 0         | 0         | 0         | 0          | 0          | 1         | 0         | 0         | 0         |
| Photobacterium     | 2              | 119            | 1       | 1       | 0         | 1         | 1        | 0        | 0         | 0         | 0         | 0         | 0         | 0          | 0          | 1         | 0         | 0         | 0         |
| Photorhabdus       | 2              | 149            | 1       | 1       | 0         | 1         | 0        | 0        | 0         | 0         | 0         | 0         | 0         | 0          | 0          | 0         | 0         | 0         | 0         |
| Phycisphaera       | 1              | 9              | 0       | 0       | 0         | 0         | 0        | 0        | 0         | 0         | 0         | 0         | 0         | 0          | 0          | 0         | 0         | 0         | 0         |
| Phyllobacterium    | 1              | 6              | 0       | 0       | 0         | 0         | 0        | 0        | 0         | 0         | 0         | 0         | 0         | 0          | 0          | 0         | 0         | 0         | 0         |
| Picrophilus        | 1              | 15             | 0       | 0       | 0         | 0         | 0        | 0        | 0         | 0         | 0         | 0         | 0         | 0          | 0          | 0         | 0         | 0         | 0         |
| Pirellula          | 2              | 85             | 1       | 1       | 0         | 1         | 0        | 0        | 0         | 0         | 0         | 0         | 1         | 0          | 0          | 0         | 0         | 0         | 0         |
| Planctomyces       | 2              | 93             | 1       | 1       | 0         | 1         | 1        | 0        | 0         | 0         | 0         | 0         | 1         | 0          | 0          | 0         | 0         | 0         | 0         |
| Plautia            | 1              | 17             | 0       | 0       | 0         | 1         | 0        | 0        | 0         | 0         | 0         | 0         | 0         | 0          | 0          | 0         | 0         | 0         | 0         |
| Plesiomonas        | 1              | 4              | 0       | 0       | 0         | 0         | 0        | 0        | 0         | 0         | 0         | 0         | 0         | 0          | 0          | 0         | 0         | 0         | 0         |
| Pleurocapsa        | 1              | 23             | 0       | 0       | 0         | 0         | 0        | 0        | 0         | 0         | 0         | 0         | 0         | 0          | 0          | 0         | 0         | 0         | 0         |
| Polaribacter       | 2              | 74             | 1       | 0       | 1         | 1         | 1        | 0        | 0         | 0         | 0         | 0         | 0         | 0          | 0          | 1         | 0         | 0         | 0         |
| Polaromonas        | 3              | 238            | 1       | 1       | 1         | 1         | 1        | 0        | 1         | 0         | 1         | 0         | 1         | 0          | 0          | 1         | 1         | 0         | 0         |
| Polymorphum        | 3              | 173            | 1       | 1       | 1         | 1         | 1        | 0        | 0         | 0         | 1         | 1         | 1         | 0          | 0          | 1         | 1         | 0         | 0         |
| Polynucleobacter   | 1              | 19             | 0       | 0       | 0         | 0         | 0        | 0        | 0         | 0         | 0         | 0         | 0         | 0          | 0          | 0         | 0         | 0         | 0         |
| Ponticaulis        | 1              | 1              | 0       | 0       | 0         | 0         | 0        | 0        | 0         | 0         | 0         | 0         | 0         | 0          | 0          | 0         | 0         | 0         | 0         |
| Porphyromonas      | 2              | 63             | 1       | 1       | 1         | 1         | 1        | 0        | 0         | 0         | 0         | 0         | 0         | 0          | 0          | 0         | 0         | 0         | 0         |
| Prevotella         | 1              | 65             | 1       | 0       | 0         | 1         | 0        | 0        | 0         | 0         | 0         | 0         | 0         | 0          | 0          | 0         | 0         | 0         | 0         |
| Prochlorococcus    | 2              | 68             | 1       | 0       | 0         | 1         | 0        | 0        | 0         | 0         | 0         | 0         | 0         | 0          | 0          | 0         | 0         | 0         | 0         |
| Propionibacterium  | 1              | 62             | 0       | 1       | 0         | 1         | 0        | 0        | 0         | 0         | 0         | 0         | 0         | 0          | 0          | 0         | 0         | 0         | 0         |
| Prosthecochloris   | 1              | 16             | 0       | 0       | 0         | 1         | 0        | 0        | 0         | 0         | 0         | 0         | 0         | 0          | 0          | 0         | 0         | 0         | 0         |
| Proteobacteria     | 1              | 19             | 0       | 1       | 0         | 0         | 0        | 0        | 0         | 0         | 0         | 0         | 0         | 0          | 0          | 0         | 0         | 0         | 0         |
| Proteus            | 2              | 113            | 1       | 1       | 0         | 1         | 1        | 0        | 1         | 0         | 0         | 0         | 0         | 0          | 0          | 0         | 0         | 0         | 0         |
| Providencia        | 1              | 38             | 0       | 1       | 0         | 0         | 0        | 0        | 0         | 0         | 0         | 0         | 0         | 0          | 0          | 0         | 0         | 0         | 0         |
| Pseudaminobacter   | 1              | 10             | 0       | 0       | 0         | 0         | 0        | 0        | 0         | 0         | 0         | 0         | 0         | 0          | 0          | 0         | 0         | 0         | 0         |
| Pseudanabaena      | 1              | 11             | 0       | 0       | 0         | 0         | 0        | 0        | 0         | 0         | 0         | 0         | 0         | 0          | 0          | 0         | 0         | 0         | 0         |
| Pseudoalteromonas  | 2              | 188            | 1       | 1       | 1         | 1         | 1        | 1        | 0         | 0         | 0         | 0         | 0         | 1          | 0          | 1         | 1         | 0         | 0         |
| Pseudochrobactrum  | 1              | 7              | 0       | 1       | 0         | 0         | 0        | 0        | 0         | 0         | 0         | 0         | 0         | 0          | 0          | 0         | 0         | 0         | 0         |
| Pseudogulbenkiania | 1              | 40             | 0       | 0       | 0         | 0         | 0        | 0        | 0         | 0         | 0         | 0         | 0         | 0          | 0          | 0         | 0         | 0         | 0         |
| pseudomallei       | 3              | 131            | 1       | 1       | 0         | 1         | 1        | 0        | 0         | 0         | 0         | 0         | 1         | 0          | 1          | 1         | 0         | 0         | 0         |

| Genus                   | Cluster Number | Protein Counts | 1.1.1.- | 1.1.1.1 | 1.1.1.157 | 1.1.1.205 | 1.1.1.35 | 1.1.1.90 | 1.12.99.6 | 1.13.11.- | 1.13.11.1 | 1.13.11.2 | 1.13.11.3 | 1.13.11.39 | 1.13.11.41 | 1.13.11.5 | 1.13.11.8 | 1.13.12.- | 1.14.11.- |
|-------------------------|----------------|----------------|---------|---------|-----------|-----------|----------|----------|-----------|-----------|-----------|-----------|-----------|------------|------------|-----------|-----------|-----------|-----------|
| Pseudomonas             | 3              | 381            | 1       | 1       | 1         | 1         | 1        | 1        | 1         | 0         | 1         | 1         | 1         | 1          | 0          | 1         | 1         | 1         | 0         |
| Pseudonocardia          | 3              | 180            | 1       | 1       | 0         | 1         | 1        | 0        | 1         | 0         | 1         | 1         | 1         | 1          | 0          | 1         | 1         | 0         | 0         |
| Pseudorhodobacter       | 1              | 4              | 0       | 0       | 0         | 1         | 0        | 0        | 0         | 0         | 0         | 0         | 0         | 0          | 0          | 0         | 0         | 0         | 0         |
| Pseudovibrio            | 1              | 33             | 0       | 0       | 0         | 0         | 0        | 0        | 0         | 0         | 0         | 0         | 0         | 0          | 0          | 0         | 0         | 0         | 0         |
| Pseudoxanthomonas       | 2              | 124            | 1       | 1       | 0         | 1         | 1        | 0        | 0         | 0         | 0         | 0         | 0         | 0          | 0          | 1         | 0         | 0         | 0         |
| Psychrobacter           | 2              | 124            | 1       | 1       | 0         | 1         | 1        | 0        | 0         | 0         | 1         | 0         | 0         | 0          | 0          | 0         | 0         | 0         | 0         |
| Psychroflexus           | 1              | 22             | 0       | 0       | 0         | 0         | 0        | 0        | 0         | 0         | 0         | 0         | 0         | 0          | 0          | 0         | 0         | 0         | 0         |
| Psychromonas            | 2              | 110            | 1       | 1       | 0         | 1         | 1        | 0        | 0         | 0         | 0         | 0         | 0         | 0          | 0          | 0         | 0         | 0         | 0         |
| Pusillimonas            | 3              | 111            | 1       | 1       | 1         | 1         | 1        | 0        | 0         | 0         | 0         | 0         | 0         | 0          | 0          | 1         | 0         | 0         | 0         |
| Pyrobaculum             | 1              | 15             | 0       | 0       | 0         | 0         | 0        | 0        | 0         | 0         | 0         | 0         | 0         | 0          | 0          | 0         | 0         | 0         | 0         |
| Pyrococcus              | 1              | 10             | 0       | 0       | 0         | 0         | 0        | 0        | 0         | 0         | 0         | 0         | 0         | 0          | 0          | 0         | 0         | 0         | 0         |
| Pyrolobus               | 1              | 4              | 0       | 0       | 0         | 0         | 0        | 0        | 0         | 0         | 0         | 0         | 0         | 0          | 0          | 0         | 0         | 0         | 0         |
| Rahnella                | 2              | 143            | 1       | 1       | 1         | 1         | 1        | 0        | 0         | 0         | 0         | 0         | 0         | 0          | 0          | 0         | 1         | 0         | 0         |
| Ralstonia               | 3              | 332            | 1       | 1       | 1         | 1         | 1        | 0        | 0         | 0         | 1         | 1         | 1         | 1          | 0          | 1         | 1         | 0         | 0         |
| Ramlibacter             | 1              | 35             | 0       | 0       | 0         | 1         | 0        | 0        | 0         | 0         | 0         | 0         | 0         | 0          | 0          | 0         | 1         | 0         | 0         |
| Raoultella              | 2              | 139            | 1       | 1       | 0         | 1         | 0        | 0        | 0         | 0         | 1         | 0         | 1         | 0          | 0          | 0         | 1         | 0         | 0         |
| Raphidiopsis            | 1              | 5              | 0       | 0       | 0         | 0         | 0        | 0        | 0         | 0         | 0         | 0         | 0         | 0          | 0          | 0         | 0         | 0         | 0         |
| Reinekea                | 1              | 2              | 0       | 0       | 0         | 0         | 0        | 0        | 0         | 0         | 0         | 0         | 0         | 0          | 0          | 0         | 0         | 0         | 0         |
| Renibacterium           | 2              | 67             | 1       | 1       | 1         | 1         | 1        | 0        | 0         | 0         | 0         | 1         | 0         | 0          | 0          | 0         | 0         | 0         | 0         |
| Rhizobiaceae            | 1              | 3              | 0       | 0       | 0         | 0         | 0        | 0        | 0         | 0         | 0         | 0         | 0         | 0          | 0          | 0         | 0         | 0         | 0         |
| Rhizobiales             | 1              | 6              | 0       | 0       | 0         | 0         | 0        | 0        | 0         | 0         | 0         | 0         | 0         | 0          | 0          | 0         | 0         | 0         | 0         |
| Rhizobium               | 3              | 257            | 1       | 1       | 1         | 1         | 1        | 0        | 1         | 1         | 1         | 1         | 1         | 0          | 0          | 1         | 0         | 0         | 0         |
| Rhizobium/Agrobacterium | 2              | 87             | 1       | 1       | 1         | 1         | 1        | 0        | 0         | 0         | 1         | 1         | 0         | 0          | 0          | 0         | 0         | 0         | 0         |
| Rhodanobacter           | 1              | 21             | 0       | 0       | 0         | 0         | 0        | 0        | 0         | 0         | 0         | 0         | 0         | 0          | 0          | 0         | 0         | 0         | 0         |
| Rhodobacter             | 3              | 175            | 1       | 1       | 1         | 1         | 1        | 0        | 1         | 0         | 0         | 1         | 0         | 1          | 0          | 0         | 0         | 0         | 0         |
| Rhodobacteraceae        | 1              | 21             | 0       | 0       | 0         | 0         | 0        | 0        | 0         | 0         | 0         | 0         | 0         | 0          | 0          | 0         | 0         | 0         | 0         |
| Rhodobacterales         | 1              | 34             | 0       | 1       | 0         | 1         | 1        | 0        | 0         | 0         | 0         | 0         | 0         | 0          | 0          | 0         | 0         | 0         | 0         |
| Rhodococcus             | 2              | 292            | 1       | 1       | 1         | 1         | 1        | 0        | 1         | 1         | 1         | 1         | 1         | 1          | 0          | 1         | 0         | 0         | 0         |
| Rhodocyclaceae          | 1              | 7              | 0       | 0       | 0         | 0         | 0        | 0        | 1         | 0         | 0         | 0         | 0         | 0          | 0          | 0         | 0         | 0         | 0         |
| Rhodoferax              | 3              | 144            | 1       | 1       | 1         | 1         | 1        | 0        | 1         | 0         | 0         | 0         | 0         | 0          | 0          | 0         | 1         | 0         | 0         |
| Rhodomicrobium          | 2              | 103            | 1       | 1       | 1         | 1         | 1        | 0        | 1         | 0         | 0         | 0         | 0         | 0          | 0          | 0         | 0         | 0         | 0         |
| Rhodopirellula          | 2              | 87             | 1       | 1       | 0         | 1         | 0        | 0        | 0         | 0         | 0         | 0         | 1         | 0          | 0          | 0         | 0         | 0         | 0         |
| Rhodopseudomonas        | 3              | 246            | 1       | 1       | 1         | 1         | 1        | 0        | 1         | 0         | 1         | 1         | 1         | 0          | 0          | 1         | 1         | 0         | 0         |
| Rhodospirillum          | 2              | 121            | 1       | 1       | 1         | 1         | 1        | 0        | 1         | 0         | 0         | 0         | 0         | 0          | 0          | 1         | 0         | 0         | 0         |
| Rhodothermus            | 2              | 76             | 0       | 1       | 1         | 1         | 1        | 0        | 0         | 0         | 0         | 0         | 0         | 0          | 0          | 0         | 0         | 0         | 0         |
| Rhodovulum              | 1              | 4              | 0       | 0       | 0         | 0         | 0        | 0        | 0         | 0         | 0         | 0         | 0         | 0          | 0          | 0         | 0         | 0         | 0         |
| Richelia                | 1              | 2              | 0       | 0       | 0         | 0         | 0        | 0        | 0         | 0         | 0         | 0         | 0         | 0          | 0          | 0         | 0         | 0         | 0         |
| Rickettsia              | 2              | 43             | 0       | 0       | 0         | 0         | 1        | 0        | 0         | 0         | 0         | 0         | 1         | 0          | 0          | 0         | 0         | 0         | 0         |
| Rickettsiaceae          | 1              | 5              | 0       | 0       | 0         | 0         | 0        | 0        | 0         | 0         | 0         | 0         | 0         | 0          | 0          | 0         | 0         | 0         | 0         |
| Riemerella              | 2              | 61             | 1       | 0       | 1         | 1         | 0        | 0        | 0         | 0         | 0         | 0         | 0         | 0          | 0          | 1         | 0         | 0         | 0         |
| Rivularia               | 1              | 18             | 0       | 0       | 0         | 0         | 0        | 0        | 0         | 0         | 0         | 0         | 0         | 0          | 0          | 0         | 0         | 0         | 0         |
| Robiginitalea           | 2              | 83             | 1       | 1       | 1         | 1         | 1        | 0        | 1         | 0         | 0         | 0         | 1         | 0          | 0          | 1         | 0         | 0         | 0         |
| Roseburia               | 2              | 58             | 1       | 1       | 0         | 1         | 1        | 0        | 0         | 0         | 0         | 0         | 0         | 0          | 0          | 0         | 0         | 0         | 0         |
| Roseibium               | 1              | 3              | 0       | 0       | 0         | 0         | 0        | 0        | 0         | 0         | 0         | 0         | 0         | 0          | 0          | 0         | 0         | 0         | 0         |
| Roseiflexus             | 3              | 100            | 1       | 1       | 0         | 1         | 0        | 0        | 1         | 0         | 0         | 1         | 0         | 0          | 0          | 0         | 0         | 0         | 0         |
| Roseobacter             | 2              | 149            | 1       | 1       | 1         | 1         | 1        | 0        | 0         | 0         | 0         | 0         | 1         | 0          | 0          | 1         | 0         | 0         | 0         |
| Roseomonas              | 1              | 2              | 0       | 0       | 0         | 0         | 0        | 0        | 0         | 0         | 0         | 0         | 0         | 0          | 0          | 0         | 0         | 0         | 0         |
| Roseovarius             | 1              | 15             | 0       | 0       | 0         | 0         | 0        | 0        | 1         | 0         | 0         | 0         | 0         | 0          | 0          | 0         | 0         | 0         | 0         |
| Rothia                  | 1              | 44             | 1       | 1       | 0         | 1         | 0        | 0        | 0         | 0         | 0         | 0         | 0         | 0          | 0          | 0         | 0         | 0         | 0         |
| Rubrivivax              | 1              | 24             | 0       | 0       | 0         | 0         | 0        | 0        | 0         | 0         | 0         | 0         | 0         | 0          | 0          | 0         | 0         | 0         | 0         |
| Rubrobacter             | 3              | 117            | 1       | 1       | 1         | 1         | 1        | 0        | 0         | 0         | 1         | 1         | 1         | 0          | 0          | 0         | 0         | 0         | 0         |
| Ruegeria                | 2              | 189            | 1       | 1       | 1         | 1         | 1        | 0        | 0         | 0         | 0         | 0         | 1         | 1          | 0          | 1         | 0         | 0         | 0         |

| Genus             | Cluster Number | Protein Counts | 1.1.1.- | 1.1.1.1 | 1.1.1.157 | 1.1.1.205 | 1.1.1.35 | 1.1.1.90 | 1.12.99.6 | 1.13.11.- | 1.13.11.1 | 1.13.11.2 | 1.13.11.3 | 1.13.11.39 | 1.13.11.41 | 1.13.11.5 | 1.13.11.8 | 1.13.12.- | 1.14.11.- |
|-------------------|----------------|----------------|---------|---------|-----------|-----------|----------|----------|-----------|-----------|-----------|-----------|-----------|------------|------------|-----------|-----------|-----------|-----------|
| Ruminococcaceae   | 1              | 2              | 0       | 0       | 0         | 0         | 0        | 0        | 0         | 0         | 0         | 0         | 0         | 0          | 0          | 0         | 0         | 0         | 0         |
| Ruminococcus      | 2              | 101            | 1       | 1       | 1         | 1         | 1        | 0        | 0         | 0         | 0         | 0         | 0         | 0          | 0          | 0         | 0         | 0         | 0         |
| Runella           | 1              | 26             | 0       | 0       | 0         | 0         | 0        | 0        | 0         | 0         | 0         | 0         | 0         | 0          | 0          | 0         | 0         | 0         | 0         |
| Saccharomonospora | 2              | 132            | 1       | 1       | 0         | 1         | 1        | 0        | 1         | 0         | 1         | 0         | 1         | 0          | 0          | 1         | 1         | 0         | 0         |
| Saccharophagus    | 2              | 81             | 1       | 1       | 0         | 1         | 0        | 0        | 0         | 0         | 0         | 0         | 0         | 0          | 0          | 0         | 0         | 0         | 0         |
| Saccharopolyspora | 3              | 194            | 1       | 1       | 0         | 1         | 1        | 0        | 1         | 0         | 1         | 0         | 1         | 0          | 0          | 1         | 0         | 0         | 0         |
| Saccharothrix     | 1              | 32             | 0       | 0       | 0         | 0         | 0        | 0        | 0         | 0         | 0         | 0         | 0         | 0          | 0          | 0         | 0         | 0         | 0         |
| Sagittula         | 1              | 10             | 0       | 0       | 0         | 0         | 0        | 0        | 1         | 0         | 0         | 1         | 0         | 0          | 0          | 0         | 0         | 0         | 0         |
| Salinibacter      | 2              | 77             | 1       | 1       | 1         | 1         | 1        | 0        | 0         | 0         | 0         | 0         | 0         | 0          | 0          | 0         | 0         | 0         | 0         |
| Salinimonas       | 1              | 1              | 0       | 0       | 0         | 0         | 0        | 0        | 0         | 0         | 0         | 0         | 0         | 0          | 0          | 0         | 0         | 0         | 0         |
| Salinispora       | 3              | 127            | 1       | 1       | 1         | 1         | 1        | 0        | 0         | 0         | 0         | 0         | 0         | 1          | 0          | 1         | 0         | 0         | 0         |
| Salinivibrio      | 1              | 2              | 0       | 0       | 0         | 0         | 0        | 0        | 0         | 0         | 0         | 0         | 0         | 0          | 0          | 0         | 0         | 0         | 0         |
| Salmonella        | 2              | 151            | 1       | 1       | 0         | 1         | 1        | 0        | 1         | 0         | 0         | 0         | 0         | 0          | 0          | 0         | 0         | 0         | 0         |
| Sanguibacter      | 2              | 73             | 1       | 1       | 0         | 1         | 0        | 0        | 0         | 0         | 0         | 0         | 0         | 0          | 0          | 0         | 0         | 0         | 0         |
| Saprospira        | 1              | 13             | 0       | 0       | 0         | 0         | 0        | 0        | 0         | 0         | 0         | 0         | 0         | 0          | 0          | 0         | 0         | 0         | 0         |
| Scardovia         | 1              | 1              | 0       | 1       | 0         | 0         | 0        | 0        | 0         | 0         | 0         | 0         | 0         | 0          | 0          | 0         | 0         | 0         | 0         |
| Scytonema         | 1              | 10             | 0       | 0       | 0         | 0         | 0        | 0        | 0         | 0         | 0         | 0         | 0         | 0          | 0          | 0         | 0         | 0         | 0         |
| Sebaldella        | 2              | 69             | 1       | 1       | 0         | 1         | 0        | 0        | 0         | 0         | 0         | 0         | 0         | 0          | 0          | 0         | 0         | 0         | 0         |
| Segniliparus      | 2              | 85             | 1       | 1       | 0         | 1         | 1        | 0        | 0         | 0         | 0         | 0         | 0         | 1          | 0          | 0         | 0         | 0         | 0         |
| Selenomonas       | 2              | 57             | 1       | 0       | 0         | 1         | 0        | 0        | 1         | 0         | 0         | 0         | 0         | 0          | 0          | 0         | 0         | 0         | 0         |
| Serinicoccus      | 1              | 1              | 0       | 0       | 0         | 0         | 0        | 0        | 0         | 0         | 0         | 1         | 0         | 0          | 0          | 0         | 0         | 0         | 0         |
| Serratia          | 2              | 186            | 1       | 1       | 1         | 1         | 1        | 0        | 0         | 0         | 0         | 0         | 1         | 1          | 0          | 0         | 1         | 0         | 0         |
| Shewanella        | 3              | 214            | 1       | 1       | 0         | 1         | 1        | 0        | 1         | 0         | 0         | 0         | 0         | 1          | 0          | 1         | 0         | 0         | 0         |
| Shigella          | 2              | 172            | 1       | 1       | 0         | 1         | 1        | 0        | 1         | 0         | 0         | 0         | 0         | 0          | 0          | 0         | 0         | 0         | 0         |
| Shinella          | 1              | 2              | 0       | 0       | 0         | 0         | 0        | 0        | 0         | 0         | 0         | 0         | 0         | 0          | 0          | 0         | 0         | 0         | 0         |
| Sideroxydans      | 2              | 81             | 1       | 1       | 0         | 1         | 0        | 0        | 1         | 0         | 0         | 0         | 0         | 0          | 0          | 0         | 0         | 0         | 0         |
| Silicibacter      | 2              | 105            | 0       | 1       | 1         | 1         | 1        | 0        | 0         | 0         | 0         | 0         | 1         | 0          | 0          | 1         | 0         | 0         | 0         |
| Simiduia          | 1              | 18             | 0       | 0       | 0         | 0         | 0        | 0        | 0         | 0         | 0         | 0         | 0         | 0          | 0          | 0         | 0         | 0         | 0         |
| Simkania          | 1              | 6              | 0       | 0       | 0         | 0         | 0        | 0        | 0         | 0         | 0         | 0         | 0         | 0          | 0          | 0         | 0         | 0         | 0         |
| Simonsiella       | 1              | 2              | 0       | 0       | 0         | 0         | 0        | 0        | 0         | 0         | 0         | 0         | 0         | 0          | 0          | 0         | 0         | 0         | 0         |
| Singulisphaera    | 1              | 18             | 0       | 0       | 0         | 0         | 0        | 0        | 0         | 0         | 0         | 0         | 0         | 0          | 0          | 0         | 0         | 0         | 0         |
| Sinorhizobium     | 3              | 207            | 1       | 1       | 1         | 1         | 1        | 0        | 0         | 1         | 1         | 0         | 1         | 0          | 0          | 1         | 0         | 0         | 0         |
| Slackia           | 2              | 46             | 1       | 1       | 0         | 1         | 1        | 0        | 0         | 0         | 0         | 0         | 0         | 0          | 0          | 0         | 0         | 0         | 0         |
| Smaragdicoccus    | 1              | 3              | 0       | 0       | 0         | 0         | 0        | 0        | 1         | 0         | 0         | 0         | 0         | 0          | 0          | 0         | 0         | 0         | 0         |
| Sodalis           | 2              | 71             | 1       | 1       | 0         | 1         | 0        | 0        | 0         | 0         | 0         | 0         | 0         | 0          | 0          | 0         | 0         | 0         | 0         |
| Solibacillus      | 1              | 23             | 0       | 0       | 0         | 1         | 0        | 0        | 0         | 0         | 0         | 0         | 0         | 0          | 0          | 0         | 0         | 0         | 0         |
| Solitaea          | 1              | 13             | 0       | 0       | 0         | 0         | 0        | 0        | 0         | 0         | 0         | 0         | 0         | 0          | 0          | 0         | 0         | 0         | 0         |
| Sorangium         | 3              | 115            | 1       | 1       | 0         | 1         | 1        | 0        | 0         | 0         | 1         | 0         | 1         | 0          | 0          | 1         | 0         | 0         | 0         |
| Sphaerobacter     | 2              | 100            | 0       | 1       | 1         | 1         | 1        | 0        | 1         | 0         | 0         | 1         | 1         | 0          | 0          | 0         | 0         | 0         | 0         |
| Sphaerochaeta     | 1              | 42             | 1       | 1       | 0         | 1         | 0        | 0        | 0         | 0         | 0         | 0         | 0         | 0          | 0          | 0         | 0         | 0         | 0         |
| Sphingobacterium  | 3              | 85             | 1       | 1       | 1         | 1         | 1        | 0        | 0         | 0         | 0         | 0         | 0         | 0          | 0          | 0         | 0         | 0         | 0         |
| Sphingobium       | 1              | 179            | 1       | 1       | 0         | 1         | 1        | 0        | 0         | 0         | 1         | 1         | 0         | 1          | 0          | 1         | 1         | 0         | 0         |
| Sphingomonadaceae | 1              | 15             | 0       | 1       | 0         | 0         | 0        | 0        | 0         | 0         | 0         | 0         | 0         | 0          | 0          | 0         | 0         | 0         | 0         |
| Sphingomonas      | 2              | 220            | 1       | 1       | 1         | 1         | 1        | 0        | 0         | 0         | 1         | 1         | 1         | 1          | 0          | 1         | 1         | 0         | 0         |
| Sphingopyxis      | 3              | 99             | 1       | 1       | 0         | 1         | 1        | 0        | 1         | 0         | 0         | 0         | 0         | 0          | 0          | 0         | 0         | 0         | 0         |
| Spirochaeta       | 2              | 103            | 1       | 1       | 0         | 1         | 0        | 0        | 0         | 0         | 0         | 0         | 0         | 0          | 0          | 0         | 0         | 0         | 0         |
| Spiroplasma       | 1              | 6              | 0       | 0       | 0         | 0         | 0        | 0        | 0         | 0         | 0         | 0         | 0         | 0          | 0          | 0         | 0         | 0         | 0         |
| Spirosoma         | 2              | 107            | 1       | 1       | 1         | 1         | 1        | 0        | 1         | 0         | 0         | 1         | 1         | 0          | 0          | 1         | 0         | 0         | 0         |
| Stackebrandtia    | 2              | 110            | 1       | 1       | 1         | 1         | 1        | 0        | 0         | 0         | 1         | 0         | 1         | 0          | 0          | 1         | 0         | 0         | 0         |
| Stanieria         | 1              | 17             | 0       | 0       | 0         | 0         | 0        | 0        | 0         | 0         | 0         | 0         | 0         | 0          | 0          | 0         | 0         | 0         | 0         |
| Staphylococcus    | 2              | 108            | 1       | 1       | 0         | 1         | 1        | 0        | 0         | 0         | 0         | 0         | 0         | 0          | 0          | 0         | 0         | 0         | 0         |
| Staphylothermus   | 1              | 12             | 0       | 0       | 0         | 0         | 0        | 0        | 0         | 0         | 0         | 0         | 0         | 0          | 0          | 0         | 0         | 0         | 0         |

| Genus                  | Cluster Number | Protein Counts | 1.1.1.- | 1.1.1.1 | 1.1.1.157 | 1.1.1.205 | 1.1.1.35 | 1.1.1.90 | 1.12.99.6 | 1.13.11.- | 1.13.11.1 | 1.13.11.2 | 1.13.11.3 | 1.13.11.39 | 1.13.11.41 | 1.13.11.5 | 1.13.11.8 | 1.13.12.- | 1.14.11.- |
|------------------------|----------------|----------------|---------|---------|-----------|-----------|----------|----------|-----------|-----------|-----------|-----------|-----------|------------|------------|-----------|-----------|-----------|-----------|
| Stappia                | 1              | 2              | 0       | 0       | 0         | 0         | 0        | 0        | 0         | 0         | 0         | 0         | 0         | 0          | 0          | 0         | 0         | 0         | 0         |
| Starkeya               | 3              | 134            | 1       | 1       | 1         | 1         | 1        | 0        | 0         | 0         | 0         | 0         | 0         | 0          | 0          | 0         | 0         | 0         | 0         |
| Stenotrophomonas       | 3              | 104            | 1       | 1       | 0         | 1         | 1        | 0        | 0         | 0         | 1         | 0         | 1         | 0          | 0          | 1         | 0         | 0         | 0         |
| Stigmatella            | 3              | 129            | 1       | 1       | 0         | 1         | 1        | 0        | 0         | 0         | 0         | 0         | 1         | 0          | 0          | 1         | 0         | 0         | 0         |
| Streptobacillus        | 1              | 38             | 0       | 1       | 0         | 1         | 0        | 0        | 0         | 0         | 0         | 0         | 0         | 0          | 0          | 0         | 0         | 0         | 0         |
| Streptococcus          | 2              | 121            | 1       | 1       | 0         | 1         | 1        | 0        | 0         | 0         | 0         | 0         | 0         | 0          | 0          | 0         | 0         | 0         | 0         |
| Streptomyces           | 2              | 253            | 1       | 1       | 1         | 1         | 1        | 0        | 1         | 1         | 1         | 1         | 1         | 1          | 0          | 1         | 0         | 1         | 0         |
| Streptosporangium      | 3              | 148            | 1       | 1       | 0         | 1         | 1        | 0        | 1         | 0         | 1         | 0         | 1         | 1          | 0          | 1         | 0         | 0         | 0         |
| Strigomonas            | 1              | 2              | 0       | 0       | 0         | 0         | 0        | 0        | 0         | 0         | 0         | 0         | 0         | 0          | 0          | 0         | 0         | 0         | 0         |
| Sulfitobacter          | 1              | 10             | 0       | 0       | 0         | 0         | 0        | 0        | 0         | 0         | 0         | 0         | 0         | 0          | 0          | 0         | 0         | 0         | 0         |
| Sulfobacillus          | 1              | 30             | 0       | 0       | 0         | 0         | 0        | 0        | 0         | 0         | 0         | 0         | 0         | 0          | 0          | 0         | 0         | 0         | 0         |
| Sulfolobus             | 1              | 23             | 0       | 0       | 0         | 0         | 0        | 0        | 0         | 0         | 0         | 0         | 0         | 0          | 0          | 0         | 0         | 0         | 0         |
| Sulfuricurvum          | 2              | 67             | 1       | 0       | 0         | 1         | 0        | 0        | 1         | 0         | 0         | 0         | 0         | 0          | 0          | 0         | 0         | 0         | 0         |
| Sulfurihydrogenibium   | 2              | 55             | 1       | 1       | 0         | 1         | 0        | 0        | 1         | 0         | 0         | 0         | 0         | 0          | 0          | 0         | 0         | 0         | 0         |
| Sulfurimonas           | 2              | 60             | 1       | 0       | 0         | 1         | 0        | 0        | 1         | 0         | 0         | 0         | 0         | 0          | 0          | 0         | 0         | 0         | 0         |
| Sulfurospirillum       | 1              | 48             | 1       | 0       | 0         | 1         | 0        | 0        | 0         | 0         | 0         | 0         | 0         | 0          | 0          | 0         | 0         | 0         | 0         |
| Sulfurovum             | 2              | 48             | 0       | 0       | 0         | 1         | 0        | 0        | 1         | 0         | 0         | 0         | 0         | 0          | 0          | 0         | 0         | 0         | 0         |
| Symbiobacterium        | 2              | 68             | 1       | 1       | 1         | 1         | 1        | 0        | 0         | 0         | 0         | 0         | 0         | 0          | 0          | 0         | 0         | 0         | 0         |
| Synechococcus          | 1              | 34             | 0       | 0       | 0         | 0         | 0        | 0        | 0         | 0         | 0         | 0         | 0         | 0          | 0          | 0         | 0         | 0         | 0         |
| Synechocystis          | 1              | 40             | 0       | 1       | 0         | 0         | 0        | 0        | 0         | 0         | 0         | 0         | 0         | 0          | 0          | 0         | 0         | 0         | 0         |
| Synergistetes          | 1              | 27             | 0       | 1       | 0         | 1         | 0        | 0        | 0         | 0         | 0         | 0         | 0         | 0          | 0          | 0         | 0         | 0         | 0         |
| Syntrophobacter        | 2              | 101            | 1       | 0       | 0         | 1         | 1        | 0        | 1         | 0         | 0         | 0         | 0         | 0          | 0          | 0         | 0         | 0         | 0         |
| Syntrophobotulus       | 2              | 71             | 1       | 1       | 0         | 1         | 0        | 0        | 0         | 0         | 0         | 0         | 0         | 0          | 0          | 0         | 0         | 0         | 0         |
| Syntrophomonas         | 2              | 58             | 1       | 0       | 1         | 1         | 1        | 0        | 0         | 0         | 0         | 0         | 0         | 0          | 0          | 0         | 0         | 0         | 0         |
| Syntrophothermus       | 2              | 60             | 0       | 1       | 1         | 1         | 1        | 0        | 0         | 0         | 0         | 0         | 0         | 0          | 0          | 0         | 0         | 0         | 0         |
| Syntrophus             | 2              | 66             | 0       | 1       | 0         | 1         | 1        | 0        | 1         | 0         | 0         | 0         | 0         | 0          | 0          | 0         | 0         | 0         | 0         |
| Tannerella             | 1              | 8              | 0       | 0       | 0         | 0         | 0        | 0        | 0         | 0         | 0         | 0         | 0         | 0          | 0          | 0         | 0         | 0         | 0         |
| Taylorella             | 1              | 43             | 0       | 0       | 0         | 1         | 0        | 0        | 0         | 0         | 0         | 0         | 0         | 0          | 0          | 0         | 0         | 0         | 0         |
| Tepidanaerobacter      | 2              | 55             | 0       | 1       | 0         | 1         | 0        | 0        | 0         | 0         | 0         | 0         | 0         | 0          | 0          | 0         | 0         | 0         | 0         |
| Teredinibacter         | 2              | 109            | 1       | 0       | 0         | 1         | 1        | 0        | 0         | 0         | 0         | 0         | 0         | 0          | 0          | 0         | 1         | 0         | 0         |
| Terrabacter            | 1              | 1              | 0       | 0       | 0         | 0         | 0        | 0        | 0         | 0         | 0         | 0         | 0         | 0          | 0          | 0         | 0         | 0         | 0         |
| Terriglobus            | 2              | 83             | 1       | 1       | 0         | 1         | 0        | 0        | 0         | 0         | 0         | 0         | 0         | 1          | 0          | 0         | 0         | 0         | 0         |
| Tetragenococcus        | 1              | 12             | 0       | 0       | 0         | 0         | 0        | 0        | 0         | 0         | 0         | 0         | 0         | 0          | 0          | 0         | 0         | 0         | 0         |
| Thalassiobium          | 1              | 11             | 0       | 0       | 0         | 0         | 0        | 0        | 0         | 0         | 0         | 0         | 0         | 0          | 0          | 0         | 0         | 0         | 0         |
| Thalassobacter         | 1              | 9              | 0       | 0       | 0         | 0         | 0        | 0        | 0         | 0         | 0         | 0         | 0         | 0          | 0          | 0         | 0         | 0         | 0         |
| Thalassolituus         | 1              | 12             | 0       | 0       | 0         | 0         | 0        | 0        | 0         | 0         | 0         | 0         | 0         | 0          | 0          | 0         | 0         | 0         | 0         |
| Thalassospira          | 1              | 2              | 0       | 0       | 0         | 0         | 0        | 0        | 0         | 0         | 0         | 0         | 0         | 0          | 0          | 0         | 0         | 0         | 0         |
| Thauera                | 1              | 111            | 0       | 1       | 1         | 1         | 0        | 0        | 0         | 0         | 0         | 1         | 0         | 0          | 0          | 0         | 1         | 0         | 0         |
| Thermacetogenium       | 1              | 7              | 0       | 1       | 0         | 0         | 0        | 0        | 0         | 0         | 0         | 0         | 0         | 0          | 0          | 0         | 0         | 0         | 0         |
| Thermaerobacter        | 2              | 79             | 1       | 1       | 0         | 1         | 1        | 0        | 0         | 0         | 0         | 1         | 0         | 0          | 0          | 0         | 0         | 0         | 0         |
| Thermanaerovibrio      | 2              | 58             | 0       | 1       | 0         | 1         | 0        | 0        | 0         | 0         | 0         | 0         | 0         | 0          | 0          | 0         | 0         | 0         | 0         |
| Thermincola            | 2              | 62             | 0       | 1       | 1         | 1         | 0        | 0        | 1         | 0         | 0         | 0         | 0         | 0          | 0          | 0         | 0         | 0         | 0         |
| Thermoanaerobacter     | 2              | 76             | 1       | 1       | 1         | 1         | 0        | 0        | 0         | 0         | 0         | 0         | 0         | 0          | 0          | 0         | 0         | 0         | 0         |
| Thermoanaerobacterium  | 2              | 64             | 1       | 1       | 1         | 1         | 0        | 0        | 0         | 0         | 0         | 0         | 0         | 0          | 0          | 0         | 0         | 0         | 0         |
| Thermobacillus         | 1              | 11             | 0       | 0       | 0         | 0         | 0        | 0        | 0         | 0         | 0         | 0         | 0         | 0          | 0          | 0         | 0         | 0         | 0         |
| Thermobaculum          | 2              | 62             | 0       | 1       | 1         | 1         | 0        | 0        | 0         | 0         | 0         | 0         | 0         | 0          | 0          | 0         | 0         | 0         | 0         |
| Thermobifida           | 2              | 72             | 0       | 1       | 0         | 1         | 1        | 0        | 0         | 0         | 0         | 0         | 0         | 0          | 0          | 0         | 0         | 0         | 0         |
| Thermobispora          | 2              | 109            | 1       | 1       | 0         | 1         | 0        | 0        | 1         | 0         | 0         | 0         | 1         | 1          | 0          | 1         | 0         | 0         | 0         |
| Thermococcus           | 1              | 13             | 0       | 0       | 0         | 0         | 0        | 0        | 0         | 0         | 0         | 0         | 0         | 0          | 0          | 0         | 0         | 0         | 0         |
| Thermocrinis           | 2              | 60             | 1       | 1       | 0         | 1         | 0        | 0        | 1         | 0         | 0         | 0         | 0         | 0          | 0          | 0         | 0         | 0         | 0         |
| Thermodesulfator       | 1              | 10             | 0       | 0       | 0         | 0         | 0        | 0        | 0         | 0         | 0         | 0         | 0         | 0          | 0          | 0         | 0         | 0         | 0         |
| Thermodesulfobacterium | 1              | 9              | 0       | 0       | 0         | 0         | 0        | 0        | 0         | 0         | 0         | 0         | 0         | 0          | 0          | 0         | 0         | 0         | 0         |

| Genus                | Cluster Number | Protein Counts | 1.1.1.- | 1.1.1.1 | 1.1.1.157 | 1.1.1.205 | 1.1.1.35 | 1.1.1.90 | 1.12.99.6 | 1.13.11.- | 1.13.11.1 | 1.13.11.2 | 1.13.11.3 | 1.13.11.39 | 1.13.11.41 | 1.13.11.5 | 1.13.11.8 | 1.13.12.- | 1.14.11.- |
|----------------------|----------------|----------------|---------|---------|-----------|-----------|----------|----------|-----------|-----------|-----------|-----------|-----------|------------|------------|-----------|-----------|-----------|-----------|
| Thermodesulfobium    | 1              | 13             | 0       | 0       | 0         | 0         | 0        | 0        | 0         | 0         | 0         | 0         | 0         | 0          | 0          | 0         | 0         | 0         | 0         |
| Thermodesulfobivrio  | 2              | 60             | 1       | 1       | 0         | 1         | 0        | 0        | 1         | 0         | 0         | 0         | 0         | 0          | 0          | 0         | 0         | 0         | 0         |
| Thermofilum          | 1              | 9              | 0       | 0       | 0         | 0         | 0        | 0        | 0         | 0         | 0         | 0         | 0         | 0          | 0          | 0         | 0         | 0         | 0         |
| Thermogladus         | 1              | 7              | 0       | 0       | 0         | 0         | 0        | 0        | 0         | 0         | 0         | 0         | 0         | 0          | 0          | 0         | 0         | 0         | 0         |
| Thermomicrobium      | 2              | 92             | 0       | 1       | 0         | 1         | 0        | 0        | 1         | 0         | 0         | 1         | 0         | 0          | 0          | 0         | 0         | 0         | 0         |
| Thermomonospora      | 2              | 125            | 0       | 1       | 0         | 1         | 1        | 0        | 0         | 0         | 0         | 1         | 1         | 1          | 0          | 1         | 0         | 0         | 0         |
| Thermoplasma         | 1              | 11             | 0       | 0       | 0         | 0         | 0        | 0        | 0         | 0         | 0         | 0         | 0         | 0          | 0          | 0         | 0         | 0         | 0         |
| Thermoplasmatales    | 1              | 6              | 0       | 0       | 0         | 0         | 0        | 0        | 0         | 0         | 0         | 0         | 0         | 0          | 0          | 0         | 0         | 0         | 0         |
| Thermoproteus        | 1              | 12             | 0       | 0       | 0         | 0         | 0        | 0        | 0         | 0         | 0         | 0         | 0         | 0          | 0          | 0         | 0         | 0         | 0         |
| Thermosediminibacter | 2              | 64             | 0       | 1       | 0         | 1         | 0        | 0        | 0         | 0         | 0         | 0         | 0         | 0          | 0          | 0         | 0         | 0         | 0         |
| Thermosipho          | 2              | 70             | 1       | 1       | 0         | 1         | 0        | 0        | 0         | 0         | 0         | 0         | 0         | 0          | 0          | 0         | 0         | 0         | 0         |
| Thermosphaera        | 1              | 10             | 0       | 0       | 0         | 0         | 0        | 0        | 0         | 0         | 0         | 0         | 0         | 0          | 0          | 0         | 0         | 0         | 0         |
| Thermosynechococcus  | 1              | 6              | 0       | 0       | 0         | 0         | 0        | 0        | 0         | 0         | 0         | 0         | 0         | 0          | 0          | 0         | 0         | 0         | 0         |
| Thermotoga           | 2              | 80             | 1       | 1       | 0         | 1         | 0        | 0        | 0         | 0         | 0         | 0         | 0         | 0          | 0          | 0         | 0         | 0         | 0         |
| Thermovibrio         | 2              | 58             | 0       | 1       | 0         | 1         | 0        | 0        | 0         | 0         | 0         | 0         | 0         | 0          | 0          | 0         | 0         | 0         | 0         |
| Thermovirga          | 1              | 9              | 0       | 0       | 0         | 0         | 0        | 0        | 0         | 0         | 0         | 0         | 0         | 0          | 0          | 0         | 0         | 0         | 0         |
| Thermus              | 2              | 107            | 1       | 1       | 1         | 1         | 1        | 0        | 0         | 0         | 0         | 1         | 0         | 0          | 0          | 0         | 0         | 0         | 0         |
| Thioalkalimicrobium  | 1              | 4              | 0       | 0       | 0         | 0         | 0        | 0        | 0         | 0         | 0         | 0         | 0         | 0          | 0          | 0         | 0         | 0         | 0         |
| Thioalkalivibrio     | 2              | 91             | 1       | 1       | 0         | 1         | 0        | 0        | 1         | 0         | 0         | 0         | 0         | 0          | 0          | 0         | 0         | 0         | 0         |
| Thiobaca             | 1              | 2              | 0       | 0       | 0         | 0         | 0        | 0        | 0         | 0         | 0         | 0         | 0         | 0          | 0          | 0         | 0         | 0         | 0         |
| Thiobacillus         | 2              | 67             | 1       | 1       | 0         | 1         | 0        | 0        | 1         | 0         | 0         | 0         | 0         | 0          | 0          | 0         | 0         | 0         | 0         |
| Thiocapsa            | 1              | 2              | 0       | 0       | 0         | 0         | 0        | 0        | 0         | 0         | 0         | 0         | 0         | 0          | 0          | 0         | 0         | 0         | 0         |
| Thiocystis           | 1              | 11             | 0       | 0       | 0         | 0         | 0        | 0        | 0         | 0         | 0         | 0         | 0         | 0          | 0          | 0         | 0         | 0         | 0         |
| Thioflavococcus      | 1              | 13             | 0       | 0       | 0         | 0         | 0        | 0        | 0         | 0         | 0         | 0         | 0         | 0          | 0          | 0         | 0         | 0         | 0         |
| Thiomicrospira       | 2              | 50             | 0       | 1       | 0         | 1         | 0        | 0        | 0         | 0         | 0         | 0         | 0         | 0          | 0          | 0         | 0         | 0         | 0         |
| Thiomonas            | 2              | 85             | 1       | 1       | 0         | 1         | 0        | 0        | 1         | 0         | 0         | 0         | 0         | 0          | 0          | 0         | 1         | 0         | 0         |
| Thiorhodococcus      | 1              | 2              | 0       | 0       | 0         | 0         | 0        | 0        | 0         | 0         | 0         | 0         | 0         | 0          | 0          | 0         | 0         | 0         | 0         |
| Thiothrix            | 1              | 2              | 0       | 0       | 0         | 0         | 0        | 0        | 0         | 0         | 0         | 0         | 0         | 0          | 0          | 0         | 0         | 0         | 0         |
| Tistrella            | 1              | 42             | 0       | 0       | 0         | 0         | 0        | 0        | 0         | 0         | 0         | 0         | 0         | 0          | 0          | 0         | 0         | 0         | 0         |
| Tolumonas            | 2              | 100            | 1       | 1       | 0         | 1         | 0        | 0        | 0         | 0         | 0         | 0         | 0         | 0          | 0          | 0         | 0         | 0         | 0         |
| Transposon           | 1              | 2              | 0       | 0       | 0         | 0         | 0        | 0        | 0         | 0         | 0         | 0         | 0         | 0          | 0          | 0         | 0         | 0         | 0         |
| Treponema            | 1              | 63             | 1       | 1       | 0         | 1         | 1        | 0        | 0         | 0         | 0         | 0         | 0         | 0          | 0          | 0         | 0         | 0         | 0         |
| Trichodesmium        | 2              | 71             | 1       | 1       | 0         | 1         | 0        | 0        | 1         | 0         | 0         | 0         | 0         | 0          | 0          | 0         | 0         | 0         | 0         |
| Trichormus           | 1              | 12             | 0       | 0       | 0         | 1         | 0        | 0        | 0         | 0         | 0         | 0         | 0         | 0          | 0          | 0         | 0         | 0         | 0         |
| Tropheryma           | 2              | 22             | 0       | 0       | 0         | 1         | 0        | 0        | 0         | 0         | 0         | 0         | 0         | 0          | 0          | 0         | 0         | 0         | 0         |
| Truepera             | 2              | 104            | 1       | 1       | 0         | 1         | 1        | 0        | 0         | 0         | 1         | 0         | 0         | 0          | 0          | 0         | 0         | 0         | 0         |
| Tsukamurella         | 2              | 123            | 1       | 1       | 0         | 1         | 1        | 0        | 0         | 0         | 0         | 0         | 1         | 1          | 0          | 0         | 0         | 0         | 0         |
| Turneriella          | 1              | 16             | 0       | 0       | 0         | 0         | 0        | 0        | 0         | 0         | 0         | 0         | 0         | 0          | 0          | 0         | 0         | 0         | 0         |
| Uliginosibacterium   | 1              | 2              | 0       | 0       | 0         | 0         | 0        | 0        | 0         | 0         | 0         | 0         | 0         | 0          | 0          | 0         | 0         | 0         | 0         |
| Ureaplasma           | 1              | 24             | 0       | 0       | 0         | 0         | 0        | 0        | 0         | 0         | 0         | 0         | 0         | 0          | 0          | 0         | 0         | 0         | 0         |
| Ureibacillus         | 1              | 2              | 0       | 0       | 0         | 0         | 0        | 0        | 0         | 0         | 0         | 0         | 0         | 0          | 0          | 0         | 0         | 0         | 0         |
| Variovorax           | 3              | 187            | 1       | 1       | 1         | 1         | 1        | 0        | 0         | 0         | 1         | 0         | 1         | 1          | 0          | 1         | 1         | 1         | 0         |
| Veillonella          | 1              | 54             | 0       | 1       | 0         | 1         | 0        | 0        | 1         | 0         | 0         | 0         | 0         | 0          | 0          | 0         | 0         | 0         | 0         |
| Verminephrobacter    | 3              | 188            | 1       | 1       | 1         | 1         | 1        | 0        | 0         | 0         | 1         | 1         | 0         | 0          | 0          | 0         | 1         | 0         | 0         |
| Verrucosispora       | 3              | 126            | 1       | 1       | 1         | 1         | 1        | 0        | 0         | 0         | 0         | 0         | 1         | 1          | 0          | 1         | 0         | 0         | 0         |
| Vibrio               | 2              | 195            | 1       | 1       | 0         | 1         | 1        | 0        | 0         | 1         | 0         | 0         | 1         | 0          | 0          | 1         | 0         | 0         | 0         |
| Vibrionales          | 1              | 46             | 0       | 0       | 0         | 1         | 0        | 0        | 0         | 0         | 0         | 0         | 0         | 0          | 0          | 0         | 0         | 0         | 0         |
| Vitreoscilla         | 1              | 1              | 0       | 0       | 0         | 0         | 0        | 0        | 0         | 0         | 0         | 0         | 0         | 0          | 0          | 0         | 0         | 0         | 0         |
| Vulcanisaeta         | 1              | 14             | 0       | 0       | 0         | 0         | 0        | 0        | 0         | 0         | 0         | 0         | 0         | 0          | 0          | 0         | 0         | 0         | 0         |
| Waddlia              | 2              | 68             | 1       | 1       | 0         | 1         | 1        | 0        | 0         | 0         | 0         | 0         | 0         | 0          | 0          | 0         | 0         | 0         | 0         |
| Wautersia            | 1              | 2              | 0       | 0       | 0         | 0         | 0        | 0        | 0         | 0         | 0         | 0         | 0         | 0          | 0          | 0         | 0         | 0         | 0         |
| Weeksella            | 2              | 65             | 1       | 0       | 1         | 1         | 1        | 0        | 0         | 0         | 0         | 0         | 0         | 0          | 0          | 1         | 1         | 0         | 0         |



| Genus             | Cluster Number | Protein Counts | 1.1.1.- | 1.1.1.1 | 1.1.1.157 | 1.1.1.205 | 1.1.1.35 | 1.1.1.90 | 1.12.99.6 | 1.13.11.- | 1.13.11.1 | 1.13.11.2 | 1.13.11.3 | 1.13.11.39 | 1.13.11.41 | 1.13.11.5 | 1.13.11.8 | 1.13.12.- | 1.14.11.- |
|-------------------|----------------|----------------|---------|---------|-----------|-----------|----------|----------|-----------|-----------|-----------|-----------|-----------|------------|------------|-----------|-----------|-----------|-----------|
| Weissella         | 1              | 14             | 0       | 0       | 0         | 0         | 0        | 0        | 0         | 0         | 0         | 0         | 0         | 0          | 0          | 0         | 0         | 0         | 0         |
| Wenxinia          | 1              | 2              | 0       | 0       | 0         | 0         | 0        | 0        | 0         | 0         | 0         | 0         | 0         | 0          | 0          | 0         | 0         | 0         | 0         |
| Wigglesworthia    | 1              | 29             | 0       | 0       | 0         | 1         | 0        | 0        | 0         | 0         | 0         | 0         | 0         | 0          | 0          | 0         | 0         | 0         | 0         |
| Wolbachia         | 1              | 32             | 1       | 0       | 0         | 1         | 0        | 0        | 0         | 0         | 0         | 0         | 1         | 0          | 0          | 0         | 0         | 0         | 0         |
| Wolinella         | 2              | 51             | 1       | 0       | 0         | 1         | 0        | 0        | 0         | 0         | 0         | 0         | 0         | 0          | 0          | 0         | 0         | 0         | 0         |
| Xanthobacter      | 3              | 176            | 1       | 1       | 1         | 1         | 1        | 0        | 1         | 1         | 1         | 0         | 1         | 1          | 0          | 1         | 0         | 1         | 0         |
| Xanthobacteraceae | 1              | 4              | 0       | 0       | 0         | 0         | 0        | 0        | 0         | 0         | 0         | 0         | 0         | 0          | 0          | 0         | 0         | 0         | 0         |
| Xanthomonadaceae  | 1              | 39             | 1       | 1       | 0         | 1         | 0        | 0        | 0         | 0         | 0         | 0         | 0         | 0          | 0          | 0         | 1         | 0         | 0         |
| Xanthomonas       | 2              | 162            | 1       | 1       | 1         | 1         | 1        | 0        | 0         | 0         | 0         | 0         | 1         | 0          | 0          | 1         | 1         | 0         | 0         |
| Xenorhabdus       | 2              | 127            | 1       | 1       | 0         | 1         | 1        | 0        | 0         | 0         | 0         | 0         | 0         | 0          | 0          | 0         | 0         | 0         | 0         |
| Xylanimonas       | 2              | 66             | 0       | 0       | 0         | 1         | 1        | 0        | 0         | 0         | 0         | 0         | 0         | 0          | 0          | 0         | 0         | 0         | 0         |
| Xylella           | 2              | 52             | 0       | 1       | 0         | 1         | 0        | 0        | 0         | 0         | 0         | 0         | 0         | 0          | 0          | 0         | 0         | 0         | 0         |
| Yersinia          | 2              | 145            | 1       | 1       | 0         | 1         | 1        | 0        | 1         | 0         | 0         | 0         | 0         | 0          | 0          | 0         | 0         | 0         | 0         |
| Yokenella         | 2              | 61             | 1       | 1       | 0         | 1         | 0        | 0        | 0         | 0         | 0         | 0         | 0         | 0          | 0          | 0         | 0         | 0         | 0         |
| Zobellia          | 1              | 28             | 0       | 0       | 0         | 1         | 0        | 0        | 0         | 0         | 0         | 0         | 0         | 0          | 0          | 0         | 0         | 0         | 0         |
| Zunongwangia      | 2              | 98             | 1       | 1       | 1         | 1         | 1        | 0        | 0         | 0         | 0         | 0         | 0         | 0          | 0          | 0         | 1         | 0         | 0         |
| Zymomonas         | 2              | 67             | 1       | 1       | 0         | 1         | 0        | 0        | 0         | 0         | 0         | 0         | 0         | 0          | 0          | 0         | 0         | 0         | 0         |
| Zymophilus        | 1              | 2              | 0       | 0       | 0         | 0         | 0        | 0        | 0         | 0         | 0         | 0         | 0         | 0          | 0          | 0         | 0         | 0         | 0         |

| Genus               | Cluster Number | Protein Counts | 1.14.12.10 | 1.14.12.13 | 1.14.12.18 | 1.14.12.3 | 1.14.12.7 | 1.14.13.- | 1.14.13.1 | 1.14.13.2 | 1.14.13.20 | 1.14.13.22 | 1.14.13.40 | 1.14.13.50 | 1.14.13.7 | 1.14.13.8 | 1.14.13.82 |
|---------------------|----------------|----------------|------------|------------|------------|-----------|-----------|-----------|-----------|-----------|------------|------------|------------|------------|-----------|-----------|------------|
| Acaricomes          | 1              | 2              | 0          | 0          | 0          | 0         | 0         | 0         | 0         | 0         | 0          | 0          | 0          | 0          | 0         | 0         | 0          |
| Acaryochloris       | 2              | 88             | 0          | 0          | 0          | 0         | 0         | 1         | 0         | 0         | 0          | 0          | 0          | 0          | 0         | 0         | 0          |
| Acetivibrio         | 1              | 2              | 0          | 0          | 0          | 0         | 0         | 0         | 0         | 0         | 0          | 0          | 0          | 0          | 0         | 0         | 0          |
| Acetobacter         | 2              | 85             | 1          | 0          | 0          | 0         | 0         | 1         | 1         | 0         | 0          | 0          | 0          | 0          | 0         | 0         | 1          |
| Acetobacteraceae    | 1              | 2              | 0          | 0          | 0          | 0         | 0         | 0         | 0         | 0         | 0          | 0          | 0          | 0          | 0         | 0         | 0          |
| Acetobacterium      | 1              | 8              | 0          | 0          | 0          | 0         | 0         | 0         | 0         | 0         | 0          | 0          | 0          | 0          | 0         | 0         | 0          |
| Acetohalobium       | 2              | 79             | 0          | 0          | 0          | 0         | 0         | 1         | 0         | 0         | 0          | 0          | 0          | 0          | 0         | 0         | 0          |
| Acholeplasma        | 2              | 38             | 0          | 0          | 0          | 0         | 0         | 0         | 0         | 0         | 0          | 0          | 0          | 0          | 0         | 0         | 0          |
| Achromobacter       | 2              | 192            | 0          | 0          | 1          | 1         | 0         | 1         | 1         | 0         | 0          | 1          | 0          | 0          | 0         | 0         | 0          |
| Acidaminococcus     | 1              | 65             | 0          | 0          | 0          | 0         | 0         | 0         | 0         | 0         | 0          | 0          | 0          | 0          | 0         | 0         | 0          |
| Acidianus           | 1              | 9              | 0          | 0          | 0          | 0         | 0         | 0         | 0         | 0         | 0          | 0          | 0          | 0          | 0         | 0         | 0          |
| Acidilobus          | 1              | 8              | 0          | 0          | 0          | 0         | 0         | 0         | 0         | 0         | 0          | 0          | 0          | 0          | 0         | 0         | 0          |
| Acidimicrobium      | 2              | 58             | 0          | 0          | 0          | 0         | 0         | 0         | 0         | 0         | 0          | 0          | 0          | 0          | 0         | 0         | 0          |
| Acidiphilium        | 3              | 144            | 0          | 0          | 0          | 0         | 0         | 1         | 0         | 1         | 0          | 1          | 0          | 0          | 0         | 0         | 0          |
| Acidithiobacillus   | 2              | 70             | 0          | 0          | 0          | 0         | 0         | 1         | 0         | 0         | 0          | 0          | 0          | 0          | 0         | 0         | 0          |
| Acidobacterium      | 2              | 91             | 0          | 0          | 0          | 0         | 0         | 1         | 1         | 0         | 0          | 0          | 0          | 0          | 0         | 0         | 0          |
| Acidocella          | 1              | 2              | 0          | 0          | 0          | 0         | 0         | 0         | 0         | 0         | 0          | 0          | 0          | 0          | 0         | 0         | 0          |
| Acidothermus        | 2              | 68             | 0          | 0          | 0          | 0         | 0         | 0         | 0         | 0         | 0          | 0          | 0          | 0          | 0         | 0         | 0          |
| Acidovorax          | 3              | 217            | 0          | 0          | 0          | 0         | 0         | 1         | 1         | 0         | 0          | 1          | 1          | 0          | 1         | 0         | 0          |
| Aciduliprofundum    | 1              | 11             | 0          | 0          | 0          | 0         | 0         | 0         | 0         | 0         | 0          | 0          | 0          | 0          | 0         | 0         | 0          |
| Acinetobacter       | 3              | 188            | 1          | 0          | 1          | 0         | 0         | 1         | 1         | 1         | 0          | 1          | 0          | 0          | 1         | 0         | 1          |
| Actinobacillus      | 2              | 112            | 0          | 0          | 0          | 0         | 0         | 1         | 0         | 0         | 0          | 0          | 0          | 0          | 0         | 0         | 0          |
| Actinomadura        | 1              | 1              | 0          | 0          | 0          | 0         | 0         | 0         | 0         | 0         | 0          | 0          | 0          | 0          | 0         | 0         | 0          |
| Actinoplanes        | 1              | 52             | 0          | 0          | 0          | 0         | 0         | 0         | 0         | 0         | 0          | 0          | 0          | 0          | 0         | 0         | 0          |
| Actinopolyspora     | 1              | 2              | 0          | 0          | 0          | 0         | 0         | 0         | 0         | 0         | 0          | 0          | 0          | 0          | 0         | 0         | 0          |
| Actinosynnema       | 2              | 122            | 0          | 0          | 0          | 0         | 0         | 1         | 0         | 1         | 0          | 1          | 0          | 0          | 0         | 0         | 0          |
| Advenella           | 1              | 30             | 0          | 0          | 0          | 0         | 0         | 0         | 0         | 0         | 0          | 0          | 0          | 0          | 0         | 0         | 0          |
| Aequorivita         | 1              | 12             | 0          | 0          | 0          | 0         | 0         | 0         | 0         | 0         | 0          | 0          | 0          | 0          | 0         | 0         | 0          |
| Aerococcus          | 2              | 57             | 0          | 0          | 0          | 0         | 0         | 0         | 0         | 0         | 0          | 0          | 0          | 0          | 0         | 0         | 0          |
| Aeromonas           | 2              | 127            | 0          | 0          | 0          | 0         | 0         | 1         | 0         | 0         | 0          | 0          | 0          | 0          | 0         | 0         | 0          |
| Aeropyrum           | 1              | 13             | 0          | 0          | 0          | 0         | 0         | 0         | 0         | 0         | 0          | 0          | 0          | 0          | 0         | 0         | 0          |
| Afipia              | 1              | 54             | 1          | 0          | 0          | 0         | 0         | 0         | 0         | 0         | 0          | 0          | 0          | 0          | 0         | 0         | 0          |
| Aggregatibacter     | 1              | 81             | 0          | 0          | 0          | 0         | 0         | 1         | 0         | 0         | 0          | 0          | 0          | 0          | 0         | 0         | 0          |
| Agrobacterium       | 2              | 242            | 1          | 0          | 0          | 0         | 0         | 1         | 1         | 1         | 0          | 0          | 0          | 0          | 0         | 0         | 1          |
| Ahrensia            | 1              | 2              | 0          | 0          | 0          | 0         | 0         | 0         | 0         | 0         | 0          | 0          | 0          | 0          | 0         | 0         | 0          |
| Akkermansia         | 2              | 47             | 0          | 0          | 0          | 0         | 0         | 0         | 0         | 0         | 0          | 0          | 0          | 0          | 0         | 0         | 0          |
| Albidiferax         | 3              | 144            | 0          | 0          | 0          | 0         | 0         | 1         | 0         | 1         | 0          | 0          | 0          | 0          | 0         | 0         | 0          |
| Alcaligenes         | 1              | 21             | 0          | 0          | 0          | 0         | 0         | 0         | 0         | 0         | 1          | 0          | 0          | 0          | 1         | 0         | 0          |
| Alcanivorax         | 2              | 146            | 0          | 0          | 0          | 0         | 0         | 1         | 0         | 0         | 0          | 1          | 0          | 0          | 0         | 0         | 1          |
| Alicyclophilus      | 3              | 152            | 0          | 0          | 0          | 0         | 0         | 1         | 0         | 0         | 0          | 0          | 0          | 0          | 1         | 0         | 0          |
| Alicyclobacillus    | 2              | 91             | 0          | 0          | 0          | 0         | 0         | 1         | 0         | 1         | 0          | 0          | 0          | 0          | 1         | 0         | 0          |
| Aliivibrio          | 2              | 118            | 0          | 0          | 0          | 0         | 0         | 1         | 0         | 0         | 0          | 0          | 0          | 0          | 0         | 0         | 0          |
| Alishewanella       | 1              | 1              | 0          | 0          | 0          | 0         | 0         | 0         | 0         | 0         | 0          | 0          | 0          | 0          | 0         | 0         | 0          |
| Alistipes           | 1              | 52             | 0          | 0          | 0          | 0         | 0         | 0         | 0         | 0         | 0          | 0          | 0          | 0          | 0         | 0         | 0          |
| Alkalilimnicola     | 2              | 97             | 0          | 0          | 0          | 0         | 0         | 1         | 0         | 0         | 0          | 0          | 0          | 0          | 0         | 0         | 0          |
| Alkaliphilus        | 2              | 62             | 0          | 0          | 0          | 0         | 0         | 0         | 0         | 0         | 0          | 0          | 0          | 0          | 0         | 0         | 1          |
| Allochromatium      | 2              | 84             | 0          | 0          | 0          | 0         | 0         | 1         | 0         | 0         | 0          | 0          | 0          | 0          | 0         | 0         | 0          |
| Alphaproteobacteria | 1              | 3              | 0          | 0          | 0          | 0         | 0         | 0         | 0         | 0         | 0          | 0          | 0          | 0          | 0         | 0         | 0          |
| Alteromonadales     | 1              | 12             | 0          | 0          | 0          | 0         | 0         | 0         | 0         | 0         | 0          | 0          | 0          | 0          | 0         | 0         | 0          |
| Alteromonas         | 1              | 37             | 0          | 0          | 0          | 0         | 0         | 0         | 0         | 0         | 0          | 0          | 0          | 0          | 0         | 0         | 0          |
| Aminobacter         | 1              | 4              | 0          | 0          | 0          | 0         | 0         | 0         | 0         | 0         | 0          | 0          | 0          | 0          | 0         | 0         | 0          |
| Aminobacterium      | 2              | 59             | 0          | 0          | 0          | 0         | 0         | 0         | 0         | 0         | 0          | 0          | 0          | 0          | 0         | 0         | 0          |

| Genus            | Cluster Number | Protein Counts | 1.14.12.10 | 1.14.12.13 | 1.14.12.18 | 1.14.12.3 | 1.14.12.7 | 1.14.13.- | 1.14.13.1 | 1.14.13.2 | 1.14.13.20 | 1.14.13.22 | 1.14.13.40 | 1.14.13.50 | 1.14.13.7 | 1.14.13.8 | 1.14.13.82 |
|------------------|----------------|----------------|------------|------------|------------|-----------|-----------|-----------|-----------|-----------|------------|------------|------------|------------|-----------|-----------|------------|
| Ammonifex        | 2              | 50             | 0          | 0          | 0          | 0         | 0         | 0         | 0         | 0         | 0          | 0          | 0          | 0          | 0         | 0         | 0          |
| Amphibacillus    | 1              | 13             | 0          | 0          | 0          | 0         | 0         | 0         | 0         | 0         | 0          | 0          | 0          | 0          | 0         | 0         | 0          |
| Amphritea        | 1              | 2              | 0          | 0          | 0          | 0         | 0         | 0         | 0         | 0         | 0          | 0          | 0          | 0          | 0         | 0         | 0          |
| Amycolatopsis    | 2              | 201            | 1          | 0          | 0          | 0         | 0         | 1         | 1         | 1         | 0          | 1          | 1          | 0          | 0         | 0         | 0          |
| Amycolicoccus    | 1              | 43             | 0          | 0          | 0          | 0         | 0         | 0         | 0         | 0         | 0          | 0          | 0          | 0          | 0         | 0         | 0          |
| Anabaena         | 2              | 92             | 0          | 0          | 0          | 0         | 0         | 1         | 0         | 0         | 0          | 0          | 0          | 0          | 0         | 0         | 0          |
| Anaerobaculum    | 1              | 11             | 0          | 0          | 0          | 0         | 0         | 0         | 0         | 0         | 0          | 0          | 0          | 0          | 0         | 0         | 0          |
| Anaerococcus     | 2              | 46             | 0          | 0          | 0          | 0         | 0         | 0         | 0         | 0         | 0          | 0          | 0          | 0          | 0         | 0         | 0          |
| Anaerolinea      | 2              | 66             | 0          | 0          | 0          | 0         | 0         | 1         | 0         | 0         | 0          | 0          | 0          | 0          | 0         | 0         | 1          |
| Anaeromyxobacter | 3              | 117            | 0          | 0          | 0          | 0         | 0         | 1         | 1         | 0         | 0          | 0          | 0          | 0          | 0         | 0         | 0          |
| Anaerostipes     | 1              | 44             | 0          | 0          | 0          | 0         | 0         | 0         | 0         | 0         | 0          | 0          | 0          | 0          | 0         | 0         | 0          |
| Anaerotruncus    | 1              | 2              | 0          | 0          | 0          | 0         | 0         | 0         | 0         | 0         | 0          | 0          | 0          | 0          | 0         | 0         | 0          |
| Anaplasma        | 1              | 35             | 0          | 0          | 0          | 0         | 0         | 1         | 0         | 0         | 0          | 0          | 0          | 0          | 0         | 0         | 0          |
| Ancylobacter     | 1              | 3              | 0          | 0          | 0          | 0         | 0         | 0         | 0         | 0         | 0          | 0          | 0          | 0          | 0         | 0         | 0          |
| Aneurinibacillus | 1              | 1              | 0          | 0          | 0          | 0         | 0         | 0         | 0         | 0         | 0          | 0          | 0          | 0          | 0         | 0         | 0          |
| Angomonas        | 1              | 1              | 0          | 0          | 0          | 0         | 0         | 0         | 0         | 0         | 0          | 0          | 0          | 0          | 0         | 0         | 0          |
| Anoxybacillus    | 2              | 72             | 0          | 0          | 0          | 0         | 0         | 0         | 0         | 0         | 0          | 0          | 0          | 0          | 0         | 0         | 0          |
| Aquifex          | 2              | 45             | 0          | 0          | 0          | 0         | 0         | 0         | 0         | 0         | 0          | 0          | 0          | 0          | 0         | 0         | 0          |
| Aquimarina       | 1              | 2              | 0          | 0          | 0          | 0         | 0         | 0         | 0         | 0         | 0          | 0          | 0          | 0          | 0         | 0         | 0          |
| Arcanobacterium  | 2              | 45             | 0          | 0          | 0          | 0         | 0         | 0         | 0         | 0         | 0          | 0          | 0          | 0          | 0         | 0         | 0          |
| Archaeoglobus    | 1              | 14             | 0          | 0          | 0          | 0         | 0         | 0         | 0         | 0         | 0          | 0          | 0          | 0          | 0         | 0         | 0          |
| Arcobacter       | 2              | 101            | 0          | 0          | 0          | 0         | 0         | 0         | 0         | 0         | 0          | 0          | 0          | 0          | 0         | 0         | 0          |
| Aromatoleum      | 3              | 133            | 0          | 0          | 0          | 0         | 0         | 1         | 1         | 0         | 0          | 0          | 0          | 0          | 0         | 0         | 0          |
| Arsenophonus     | 1              | 4              | 0          | 0          | 0          | 0         | 0         | 0         | 0         | 0         | 0          | 0          | 0          | 0          | 0         | 0         | 0          |
| Arthrobacter     | 2              | 206            | 1          | 0          | 1          | 0         | 0         | 1         | 1         | 1         | 0          | 0          | 0          | 0          | 1         | 0         | 1          |
| Arthrospira      | 2              | 67             | 0          | 0          | 0          | 0         | 0         | 1         | 0         | 0         | 0          | 0          | 0          | 0          | 0         | 0         | 0          |
| Aster            | 1              | 10             | 0          | 0          | 0          | 0         | 0         | 0         | 0         | 0         | 0          | 0          | 0          | 0          | 0         | 0         | 0          |
| Asticcacaulis    | 2              | 103            | 0          | 0          | 0          | 0         | 0         | 1         | 0         | 0         | 0          | 0          | 0          | 0          | 0         | 0         | 0          |
| Atopobium        | 1              | 28             | 0          | 0          | 0          | 0         | 0         | 0         | 0         | 0         | 0          | 0          | 0          | 0          | 0         | 0         | 0          |
| Aurantimonas     | 1              | 2              | 0          | 0          | 0          | 0         | 0         | 0         | 0         | 0         | 0          | 0          | 0          | 0          | 0         | 0         | 0          |
| Avibacterium     | 1              | 17             | 0          | 0          | 0          | 0         | 0         | 0         | 0         | 0         | 0          | 0          | 0          | 0          | 0         | 0         | 0          |
| Azoarcus         | 3              | 172            | 0          | 1          | 0          | 0         | 0         | 1         | 0         | 1         | 0          | 0          | 1          | 0          | 1         | 0         | 0          |
| Azorhizobium     | 3              | 149            | 0          | 0          | 0          | 0         | 0         | 1         | 1         | 1         | 0          | 0          | 1          | 0          | 0         | 0         | 0          |
| Azorhizophilus   | 1              | 4              | 0          | 0          | 0          | 0         | 0         | 0         | 0         | 0         | 0          | 0          | 0          | 0          | 0         | 0         | 0          |
| Azospira         | 1              | 19             | 0          | 0          | 0          | 0         | 0         | 0         | 0         | 0         | 0          | 0          | 0          | 0          | 0         | 0         | 0          |
| Azospirillum     | 2              | 198            | 1          | 0          | 1          | 0         | 0         | 1         | 0         | 1         | 0          | 0          | 0          | 0          | 0         | 0         | 1          |
| Azotobacter      | 3              | 183            | 1          | 0          | 0          | 0         | 0         | 1         | 0         | 1         | 0          | 0          | 0          | 0          | 1         | 0         | 0          |
| Bacillales       | 1              | 9              | 0          | 0          | 0          | 0         | 0         | 0         | 0         | 0         | 0          | 0          | 0          | 0          | 0         | 0         | 0          |
| Bacilli          | 1              | 3              | 0          | 0          | 0          | 0         | 0         | 0         | 0         | 0         | 0          | 0          | 0          | 0          | 0         | 0         | 0          |
| Bacillus         | 2              | 237            | 1          | 0          | 1          | 0         | 0         | 1         | 1         | 1         | 0          | 1          | 0          | 0          | 0         | 0         | 0          |
| Bacteria         | 2              | 86             | 0          | 0          | 0          | 0         | 0         | 1         | 1         | 0         | 0          | 0          | 0          | 0          | 0         | 0         | 0          |
| Bacteriovorax    | 2              | 98             | 0          | 0          | 0          | 0         | 0         | 0         | 0         | 0         | 0          | 0          | 0          | 0          | 0         | 0         | 0          |
| Bacteroidales    | 2              | 59             | 0          | 0          | 0          | 0         | 0         | 0         | 0         | 0         | 0          | 0          | 0          | 0          | 0         | 0         | 0          |
| Bacteroides      | 2              | 96             | 0          | 0          | 0          | 0         | 0         | 0         | 0         | 0         | 0          | 0          | 0          | 0          | 1         | 0         | 0          |
| Bacteroidetes    | 1              | 2              | 0          | 0          | 0          | 0         | 0         | 0         | 0         | 0         | 0          | 0          | 0          | 0          | 0         | 0         | 0          |
| Bartonella       | 2              | 50             | 0          | 0          | 0          | 0         | 0         | 1         | 1         | 0         | 0          | 0          | 0          | 0          | 0         | 0         | 0          |
| Baumannia        | 2              | 24             | 0          | 0          | 0          | 0         | 0         | 0         | 0         | 0         | 0          | 0          | 0          | 0          | 0         | 0         | 0          |
| Bdellovibrio     | 2              | 87             | 0          | 0          | 0          | 0         | 0         | 0         | 0         | 0         | 0          | 0          | 0          | 0          | 1         | 0         | 0          |
| Beijerinckia     | 3              | 123            | 0          | 0          | 0          | 0         | 0         | 1         | 1         | 0         | 0          | 0          | 0          | 0          | 0         | 0         | 0          |
| Belliella        | 1              | 14             | 0          | 0          | 0          | 0         | 0         | 0         | 0         | 0         | 0          | 0          | 0          | 0          | 0         | 0         | 0          |
| Beutenbergia     | 2              | 82             | 0          | 0          | 0          | 0         | 0         | 1         | 0         | 0         | 0          | 0          | 0          | 0          | 0         | 0         | 0          |
| Bifidobacterium  | 2              | 61             | 0          | 0          | 0          | 0         | 0         | 0         | 0         | 0         | 0          | 0          | 0          | 0          | 0         | 0         | 0          |

| Genus                | Cluster Number | Protein Counts | 1.14.12.10 | 1.14.12.13 | 1.14.12.18 | 1.14.12.3 | 1.14.12.7 | 1.14.13.- | 1.14.13.1 | 1.14.13.2 | 1.14.13.20 | 1.14.13.22 | 1.14.13.40 | 1.14.13.50 | 1.14.13.7 | 1.14.13.8 | 1.14.13.82 |
|----------------------|----------------|----------------|------------|------------|------------|-----------|-----------|-----------|-----------|-----------|------------|------------|------------|------------|-----------|-----------|------------|
| Bizonia              | 1              | 1              | 0          | 0          | 0          | 0         | 0         | 0         | 0         | 0         | 0          | 0          | 0          | 0          | 0         | 0         | 0          |
| Blastococcus         | 1              | 39             | 0          | 0          | 0          | 0         | 0         | 0         | 0         | 0         | 0          | 0          | 0          | 0          | 0         | 0         | 0          |
| Blattabacterium      | 1              | 23             | 0          | 0          | 0          | 0         | 0         | 0         | 0         | 0         | 0          | 0          | 0          | 0          | 0         | 0         | 0          |
| Blautia              | 1              | 22             | 0          | 0          | 0          | 0         | 0         | 0         | 0         | 0         | 0          | 0          | 0          | 0          | 0         | 0         | 0          |
| Bordetella           | 3              | 227            | 1          | 0          | 1          | 0         | 1         | 1         | 1         | 0         | 0          | 1          | 0          | 0          | 0         | 0         | 0          |
| Borrelia             | 1              | 32             | 0          | 0          | 0          | 0         | 0         | 0         | 0         | 0         | 0          | 0          | 0          | 0          | 0         | 0         | 0          |
| Brachybacterium      | 1              | 18             | 0          | 0          | 0          | 0         | 0         | 0         | 0         | 0         | 0          | 0          | 0          | 0          | 0         | 0         | 0          |
| Brachymonas          | 1              | 4              | 0          | 0          | 0          | 0         | 0         | 0         | 0         | 0         | 0          | 0          | 0          | 0          | 0         | 0         | 0          |
| Brachyspira          | 2              | 79             | 0          | 0          | 0          | 0         | 0         | 0         | 0         | 0         | 0          | 0          | 0          | 0          | 0         | 0         | 0          |
| Bradyrhizobiaceae    | 1              | 20             | 1          | 0          | 0          | 0         | 0         | 0         | 0         | 0         | 0          | 0          | 0          | 0          | 0         | 0         | 0          |
| Bradyrhizobium       | 3              | 254            | 0          | 0          | 0          | 0         | 0         | 1         | 1         | 1         | 0          | 1          | 1          | 0          | 0         | 0         | 1          |
| Brenneria            | 1              | 20             | 0          | 0          | 0          | 0         | 0         | 0         | 0         | 0         | 0          | 0          | 0          | 0          | 0         | 0         | 0          |
| Brevibacillus        | 2              | 122            | 0          | 0          | 0          | 0         | 0         | 1         | 0         | 0         | 0          | 0          | 0          | 0          | 0         | 0         | 0          |
| Brevibacterium       | 1              | 4              | 0          | 0          | 0          | 0         | 0         | 0         | 0         | 0         | 0          | 0          | 0          | 0          | 0         | 0         | 0          |
| Brevundimonas        | 2              | 105            | 0          | 0          | 0          | 0         | 0         | 1         | 0         | 1         | 0          | 1          | 0          | 0          | 0         | 0         | 0          |
| Brucella             | 3              | 138            | 0          | 0          | 0          | 0         | 0         | 1         | 1         | 1         | 0          | 0          | 0          | 0          | 0         | 0         | 0          |
| Buchnera             | 1              | 26             | 0          | 0          | 0          | 0         | 0         | 0         | 0         | 0         | 0          | 0          | 0          | 0          | 0         | 0         | 0          |
| Burkholderia         | 3              | 424            | 1          | 1          | 1          | 1         | 1         | 1         | 1         | 1         | 1          | 1          | 1          | 1          | 1         | 0         | 1          |
| Burkholderiaceae     | 3              | 143            | 1          | 0          | 0          | 0         | 0         | 1         | 1         | 0         | 0          | 0          | 0          | 0          | 1         | 0         | 1          |
| Burkholderiales      | 1              | 24             | 0          | 0          | 0          | 0         | 0         | 1         | 0         | 0         | 0          | 0          | 0          | 0          | 1         | 0         | 0          |
| Buttiauxella         | 1              | 2              | 0          | 0          | 0          | 0         | 0         | 0         | 0         | 0         | 0          | 0          | 0          | 0          | 0         | 0         | 0          |
| Butyrivibrio         | 2              | 67             | 0          | 0          | 0          | 0         | 0         | 0         | 0         | 0         | 0          | 0          | 0          | 0          | 0         | 0         | 0          |
| Caldanaerobacter     | 2              | 63             | 0          | 0          | 0          | 0         | 0         | 0         | 0         | 0         | 0          | 0          | 0          | 0          | 0         | 0         | 0          |
| Caldicellulosiruptor | 2              | 75             | 0          | 0          | 0          | 0         | 0         | 0         | 0         | 0         | 0          | 0          | 0          | 0          | 0         | 0         | 0          |
| Caldilinea           | 1              | 23             | 0          | 0          | 0          | 0         | 0         | 0         | 0         | 0         | 0          | 0          | 0          | 0          | 0         | 0         | 0          |
| Caldimonas           | 1              | 6              | 0          | 0          | 0          | 0         | 0         | 0         | 0         | 0         | 0          | 0          | 0          | 0          | 0         | 0         | 0          |
| Caldisericum         | 1              | 10             | 0          | 0          | 0          | 0         | 0         | 0         | 0         | 0         | 0          | 0          | 0          | 0          | 0         | 0         | 0          |
| Caldisphaera         | 1              | 7              | 0          | 0          | 0          | 0         | 0         | 0         | 0         | 0         | 0          | 0          | 0          | 0          | 0         | 0         | 0          |
| Calditerrivibrio     | 2              | 74             | 0          | 0          | 0          | 0         | 0         | 0         | 0         | 0         | 0          | 0          | 0          | 0          | 0         | 0         | 0          |
| Caldivirga           | 1              | 13             | 0          | 0          | 0          | 0         | 0         | 0         | 0         | 0         | 0          | 0          | 0          | 0          | 0         | 0         | 0          |
| Calothrix            | 1              | 43             | 0          | 0          | 0          | 0         | 0         | 1         | 0         | 0         | 0          | 0          | 0          | 0          | 0         | 0         | 0          |
| Calyptogena          | 2              | 34             | 0          | 0          | 0          | 0         | 0         | 1         | 0         | 0         | 0          | 0          | 0          | 0          | 0         | 0         | 0          |
| Campylobacter        | 2              | 80             | 0          | 0          | 0          | 0         | 0         | 0         | 0         | 0         | 0          | 0          | 0          | 0          | 0         | 0         | 0          |
| Candidatus           | 2              | 290            | 1          | 0          | 0          | 0         | 1         | 1         | 1         | 1         | 0          | 1          | 0          | 0          | 0         | 1         | 1          |
| Capnocytophaga       | 1              | 50             | 0          | 0          | 0          | 0         | 0         | 0         | 0         | 0         | 0          | 0          | 0          | 0          | 0         | 0         | 0          |
| Carbophilus          | 1              | 2              | 0          | 0          | 0          | 0         | 0         | 0         | 0         | 0         | 0          | 0          | 0          | 0          | 0         | 0         | 0          |
| Carboxydibrachium    | 1              | 14             | 0          | 0          | 0          | 0         | 0         | 0         | 0         | 0         | 0          | 0          | 0          | 0          | 0         | 0         | 0          |
| Carboxydotherrmus    | 2              | 68             | 0          | 0          | 0          | 0         | 0         | 0         | 0         | 0         | 0          | 0          | 0          | 0          | 0         | 0         | 0          |
| Carica               | 1              | 2              | 0          | 0          | 0          | 0         | 0         | 0         | 0         | 0         | 0          | 0          | 0          | 0          | 0         | 0         | 0          |
| Carnobacterium       | 2              | 71             | 0          | 0          | 0          | 0         | 0         | 1         | 0         | 0         | 0          | 0          | 0          | 0          | 0         | 0         | 0          |
| Catenibacterium      | 1              | 2              | 0          | 0          | 0          | 0         | 0         | 0         | 0         | 0         | 0          | 0          | 0          | 0          | 0         | 0         | 0          |
| Catenovulum          | 1              | 2              | 0          | 0          | 0          | 0         | 0         | 0         | 0         | 0         | 0          | 0          | 0          | 0          | 0         | 0         | 0          |
| Catenulispora        | 3              | 159            | 1          | 0          | 0          | 0         | 0         | 1         | 1         | 1         | 0          | 1          | 1          | 0          | 0         | 0         | 0          |
| Caulobacter          | 3              | 168            | 0          | 0          | 1          | 0         | 0         | 1         | 0         | 1         | 0          | 1          | 0          | 0          | 0         | 0         | 1          |
| Cedecea              | 1              | 45             | 0          | 0          | 0          | 0         | 0         | 0         | 0         | 0         | 0          | 0          | 0          | 0          | 0         | 0         | 0          |
| Cellulomonas         | 2              | 96             | 0          | 0          | 0          | 0         | 0         | 1         | 1         | 0         | 0          | 0          | 0          | 0          | 0         | 0         | 0          |
| Cellulophaga         | 2              | 105            | 1          | 0          | 0          | 0         | 0         | 1         | 1         | 0         | 0          | 0          | 0          | 0          | 0         | 0         | 0          |
| Cellulosilyticum     | 1              | 14             | 0          | 0          | 0          | 0         | 0         | 0         | 0         | 0         | 0          | 0          | 0          | 0          | 0         | 0         | 0          |
| Cellvibrio           | 2              | 85             | 0          | 0          | 0          | 0         | 0         | 1         | 0         | 0         | 0          | 0          | 0          | 0          | 0         | 0         | 0          |
| Cenarchaeum          | 1              | 7              | 0          | 0          | 0          | 0         | 0         | 0         | 0         | 0         | 0          | 0          | 0          | 0          | 0         | 0         | 0          |
| Chamaesiphon         | 1              | 13             | 0          | 0          | 0          | 0         | 0         | 0         | 0         | 0         | 0          | 0          | 0          | 0          | 0         | 0         | 0          |
| Chelativorans        | 3              | 136            | 0          | 0          | 0          | 0         | 0         | 1         | 1         | 1         | 0          | 0          | 0          | 0          | 0         | 0         | 0          |

| Genus                  | Cluster Number | Protein Counts | 1.14.12.10 | 1.14.12.13 | 1.14.12.18 | 1.14.12.3 | 1.14.12.7 | 1.14.13.- | 1.14.13.1 | 1.14.13.2 | 1.14.13.20 | 1.14.13.22 | 1.14.13.40 | 1.14.13.50 | 1.14.13.7 | 1.14.13.8 | 1.14.13.82 |
|------------------------|----------------|----------------|------------|------------|------------|-----------|-----------|-----------|-----------|-----------|------------|------------|------------|------------|-----------|-----------|------------|
| Chelatococcus          | 1              | 2              | 0          | 0          | 0          | 0         | 0         | 0         | 0         | 0         | 0          | 0          | 0          | 0          | 0         | 0         | 0          |
| Chitinophaga           | 2              | 98             | 0          | 0          | 0          | 0         | 0         | 0         | 0         | 1         | 0          | 0          | 0          | 0          | 0         | 0         | 0          |
| Chlamydia              | 1              | 36             | 0          | 0          | 0          | 0         | 0         | 0         | 0         | 0         | 0          | 0          | 0          | 0          | 0         | 0         | 0          |
| Chlamydomonas          | 1              | 3              | 0          | 0          | 0          | 0         | 0         | 0         | 0         | 0         | 0          | 0          | 0          | 0          | 0         | 0         | 1          |
| Chlamydophila          | 1              | 31             | 0          | 0          | 0          | 0         | 0         | 0         | 0         | 0         | 0          | 0          | 0          | 0          | 0         | 0         | 0          |
| Chlorobaculum          | 2              | 61             | 0          | 0          | 0          | 0         | 0         | 0         | 0         | 0         | 0          | 0          | 0          | 0          | 0         | 0         | 0          |
| Chlorobium             | 2              | 89             | 0          | 0          | 0          | 0         | 0         | 0         | 0         | 0         | 0          | 0          | 0          | 0          | 0         | 0         | 0          |
| Chlorobium/Pelodictyon | 1              | 2              | 0          | 0          | 0          | 0         | 0         | 0         | 0         | 0         | 0          | 0          | 0          | 0          | 0         | 0         | 0          |
| Chloroflexus           | 2              | 105            | 0          | 0          | 0          | 0         | 0         | 1         | 0         | 0         | 0          | 0          | 0          | 0          | 0         | 0         | 0          |
| Chlorogloeopsis        | 1              | 9              | 0          | 0          | 0          | 0         | 0         | 0         | 0         | 0         | 0          | 0          | 0          | 0          | 0         | 0         | 0          |
| Chloroherpeton         | 2              | 59             | 0          | 0          | 0          | 0         | 0         | 0         | 0         | 0         | 0          | 0          | 0          | 0          | 0         | 0         | 0          |
| Chromobacterium        | 2              | 117            | 0          | 0          | 0          | 0         | 0         | 1         | 0         | 0         | 0          | 0          | 0          | 0          | 0         | 0         | 0          |
| Chromohalobacter       | 2              | 145            | 1          | 0          | 0          | 0         | 0         | 1         | 1         | 1         | 0          | 0          | 0          | 0          | 0         | 0         | 1          |
| Chroococciopsis        | 1              | 24             | 0          | 0          | 0          | 0         | 0         | 0         | 0         | 0         | 0          | 0          | 0          | 0          | 0         | 0         | 0          |
| Chryseobacterium       | 2              | 104            | 0          | 0          | 0          | 0         | 0         | 1         | 1         | 1         | 0          | 0          | 0          | 0          | 0         | 0         | 1          |
| Citricella             | 1              | 13             | 0          | 0          | 0          | 0         | 0         | 0         | 0         | 0         | 0          | 0          | 0          | 0          | 0         | 0         | 0          |
| Citrobacter            | 2              | 190            | 1          | 0          | 0          | 0         | 0         | 1         | 0         | 1         | 0          | 0          | 0          | 0          | 0         | 0         | 0          |
| Clavibacter            | 2              | 83             | 0          | 0          | 0          | 0         | 0         | 0         | 1         | 0         | 0          | 0          | 0          | 0          | 0         | 0         | 0          |
| Clonorchis             | 1              | 1              | 0          | 0          | 0          | 0         | 0         | 0         | 0         | 0         | 0          | 0          | 0          | 0          | 0         | 0         | 0          |
| Clostridiales          | 2              | 77             | 0          | 0          | 0          | 0         | 0         | 0         | 0         | 0         | 0          | 0          | 0          | 0          | 0         | 0         | 0          |
| Clostridium            | 2              | 191            | 0          | 0          | 0          | 0         | 0         | 1         | 0         | 0         | 0          | 0          | 0          | 0          | 0         | 0         | 0          |
| Cohnella               | 1              | 2              | 0          | 0          | 0          | 0         | 0         | 0         | 0         | 0         | 0          | 0          | 0          | 0          | 0         | 0         | 0          |
| Coleofasciculus        | 1              | 4              | 0          | 0          | 0          | 0         | 0         | 0         | 0         | 0         | 0          | 0          | 0          | 0          | 0         | 0         | 0          |
| Collimonas             | 1              | 35             | 0          | 0          | 0          | 0         | 0         | 0         | 0         | 0         | 0          | 0          | 0          | 0          | 0         | 0         | 0          |
| Colwellia              | 2              | 130            | 0          | 0          | 0          | 0         | 0         | 1         | 0         | 0         | 0          | 0          | 0          | 0          | 0         | 0         | 0          |
| Comamonas              | 2              | 196            | 0          | 0          | 0          | 0         | 1         | 1         | 1         | 1         | 0          | 1          | 0          | 0          | 1         | 0         | 1          |
| Conexibacter           | 3              | 117            | 0          | 0          | 0          | 0         | 0         | 1         | 0         | 0         | 0          | 1          | 1          | 0          | 0         | 0         | 0          |
| Coprobacillus          | 1              | 2              | 0          | 0          | 0          | 0         | 0         | 0         | 0         | 0         | 0          | 0          | 0          | 0          | 0         | 0         | 0          |
| Coprococcus            | 2              | 76             | 0          | 0          | 0          | 0         | 0         | 0         | 0         | 0         | 0          | 0          | 0          | 0          | 0         | 0         | 0          |
| Coprothermobacter      | 2              | 45             | 0          | 0          | 0          | 0         | 0         | 0         | 0         | 0         | 0          | 0          | 0          | 0          | 0         | 0         | 0          |
| Coralimargarita        | 2              | 68             | 0          | 0          | 0          | 0         | 0         | 0         | 0         | 0         | 0          | 0          | 0          | 0          | 0         | 0         | 0          |
| Corallococcus          | 1              | 29             | 0          | 0          | 0          | 0         | 0         | 0         | 0         | 0         | 0          | 0          | 0          | 0          | 0         | 0         | 0          |
| Coriobacterium         | 2              | 36             | 0          | 0          | 0          | 0         | 0         | 0         | 0         | 0         | 0          | 0          | 0          | 0          | 0         | 0         | 0          |
| Corynebacterineae      | 1              | 5              | 0          | 0          | 0          | 0         | 0         | 0         | 0         | 0         | 0          | 0          | 0          | 0          | 0         | 0         | 0          |
| Corynebacterium        | 2              | 175            | 1          | 0          | 0          | 0         | 0         | 1         | 1         | 1         | 0          | 1          | 0          | 0          | 1         | 0         | 1          |
| Coxiella               | 2              | 54             | 0          | 0          | 0          | 0         | 0         | 1         | 0         | 0         | 0          | 0          | 0          | 0          | 0         | 0         | 0          |
| Crinalium              | 1              | 21             | 0          | 0          | 0          | 0         | 0         | 0         | 0         | 0         | 0          | 0          | 0          | 0          | 0         | 0         | 0          |
| Croceibacter           | 2              | 80             | 0          | 0          | 0          | 0         | 0         | 1         | 0         | 0         | 0          | 0          | 0          | 0          | 0         | 0         | 0          |
| Crocospaera            | 1              | 6              | 0          | 0          | 0          | 0         | 0         | 0         | 0         | 0         | 0          | 0          | 0          | 0          | 0         | 0         | 0          |
| Cronobacter            | 2              | 120            | 0          | 0          | 0          | 0         | 0         | 1         | 0         | 0         | 0          | 0          | 0          | 0          | 0         | 0         | 0          |
| Cryptobacterium        | 2              | 39             | 0          | 0          | 0          | 0         | 0         | 0         | 0         | 0         | 0          | 0          | 0          | 0          | 0         | 0         | 0          |
| Cucumis                | 1              | 9              | 0          | 0          | 0          | 0         | 0         | 0         | 0         | 0         | 0          | 0          | 0          | 0          | 0         | 0         | 0          |
| Cupriavidus            | 3              | 317            | 1          | 0          | 1          | 0         | 1         | 1         | 1         | 1         | 1          | 1          | 0          | 0          | 1         | 0         | 1          |
| Curtobacterium         | 1              | 5              | 0          | 0          | 0          | 0         | 0         | 0         | 0         | 0         | 0          | 0          | 0          | 0          | 0         | 0         | 0          |
| Curvibacter            | 1              | 27             | 0          | 0          | 0          | 0         | 0         | 0         | 0         | 0         | 0          | 0          | 0          | 0          | 0         | 0         | 0          |
| Cyanobacterium         | 1              | 9              | 0          | 0          | 0          | 0         | 0         | 0         | 0         | 0         | 0          | 0          | 0          | 0          | 0         | 0         | 0          |
| Cyanobium              | 1              | 10             | 0          | 0          | 0          | 0         | 0         | 0         | 0         | 0         | 0          | 0          | 0          | 0          | 0         | 0         | 0          |
| Cyanothece             | 1              | 34             | 0          | 0          | 0          | 0         | 0         | 0         | 0         | 0         | 0          | 0          | 0          | 0          | 0         | 0         | 0          |
| Cyclobacterium         | 1              | 19             | 0          | 0          | 0          | 0         | 0         | 0         | 0         | 0         | 0          | 0          | 0          | 0          | 0         | 0         | 0          |
| Cycloclasticus         | 1              | 21             | 0          | 0          | 0          | 0         | 0         | 0         | 0         | 0         | 0          | 0          | 0          | 0          | 0         | 0         | 0          |
| Cylindrospermopsis     | 1              | 4              | 0          | 0          | 0          | 0         | 0         | 0         | 0         | 0         | 0          | 0          | 0          | 0          | 0         | 0         | 0          |
| Cylindrospermum        | 1              | 30             | 0          | 0          | 0          | 0         | 0         | 1         | 0         | 0         | 0          | 0          | 0          | 0          | 0         | 0         | 0          |

| Genus              | Cluster Number | Protein Counts | 1.14.12.10 | 1.14.12.13 | 1.14.12.18 | 1.14.12.3 | 1.14.12.7 | 1.14.13.- | 1.14.13.1 | 1.14.13.2 | 1.14.13.20 | 1.14.13.22 | 1.14.13.40 | 1.14.13.50 | 1.14.13.7 | 1.14.13.8 | 1.14.13.82 |
|--------------------|----------------|----------------|------------|------------|------------|-----------|-----------|-----------|-----------|-----------|------------|------------|------------|------------|-----------|-----------|------------|
| Cytophaga          | 2              | 69             | 0          | 0          | 0          | 0         | 0         | 0         | 0         | 0         | 0          | 0          | 0          | 0          | 0         | 0         | 0          |
| Dactylococcopsis   | 1              | 8              | 0          | 0          | 0          | 0         | 0         | 0         | 0         | 0         | 0          | 0          | 0          | 0          | 0         | 0         | 0          |
| Dechloromonas      | 1              | 40             | 0          | 0          | 0          | 0         | 0         | 0         | 0         | 0         | 0          | 0          | 0          | 0          | 0         | 0         | 0          |
| Dechlorosoma       | 1              | 19             | 0          | 0          | 0          | 0         | 0         | 0         | 0         | 0         | 0          | 0          | 0          | 0          | 0         | 0         | 0          |
| Deferribacter      | 2              | 73             | 0          | 0          | 0          | 0         | 0         | 0         | 0         | 0         | 0          | 0          | 0          | 0          | 0         | 0         | 0          |
| Dehalobacter       | 1              | 9              | 0          | 0          | 0          | 0         | 0         | 0         | 0         | 0         | 0          | 0          | 0          | 0          | 0         | 0         | 0          |
| Dehalococcoides    | 2              | 41             | 0          | 0          | 0          | 0         | 0         | 0         | 0         | 0         | 0          | 0          | 0          | 0          | 0         | 0         | 0          |
| Dehalogenimonas    | 1              | 37             | 0          | 0          | 0          | 0         | 0         | 0         | 0         | 0         | 0          | 0          | 0          | 0          | 0         | 0         | 0          |
| Deinococcus        | 2              | 140            | 0          | 0          | 0          | 0         | 0         | 1         | 1         | 1         | 0          | 0          | 0          | 0          | 0         | 0         | 0          |
| Delftia            | 3              | 177            | 0          | 0          | 0          | 0         | 0         | 1         | 1         | 1         | 0          | 0          | 0          | 0          | 0         | 0         | 1          |
| Denitrovibrio      | 2              | 67             | 0          | 0          | 0          | 0         | 0         | 0         | 0         | 0         | 0          | 0          | 0          | 0          | 0         | 0         | 0          |
| Desulfarculus      | 2              | 92             | 0          | 0          | 0          | 0         | 0         | 0         | 0         | 0         | 0          | 0          | 0          | 0          | 0         | 0         | 0          |
| Desulfatibacillum  | 3              | 84             | 0          | 0          | 0          | 0         | 0         | 0         | 0         | 0         | 0          | 0          | 0          | 0          | 0         | 0         | 0          |
| Desulfitobacterium | 2              | 102            | 0          | 0          | 0          | 0         | 0         | 1         | 0         | 0         | 0          | 0          | 0          | 0          | 0         | 0         | 0          |
| Desulfobacca       | 2              | 65             | 0          | 0          | 0          | 0         | 0         | 0         | 0         | 0         | 0          | 0          | 0          | 0          | 0         | 0         | 0          |
| Desulfobacterium   | 2              | 113            | 0          | 0          | 0          | 0         | 0         | 0         | 0         | 0         | 0          | 0          | 0          | 0          | 0         | 0         | 0          |
| Desulfobacula      | 1              | 21             | 0          | 0          | 0          | 0         | 0         | 0         | 0         | 0         | 0          | 0          | 0          | 0          | 0         | 0         | 0          |
| Desulfobulbus      | 2              | 88             | 0          | 0          | 0          | 0         | 0         | 0         | 0         | 0         | 0          | 0          | 0          | 0          | 0         | 0         | 0          |
| Desulfocapsa       | 1              | 9              | 0          | 0          | 0          | 0         | 0         | 0         | 0         | 0         | 0          | 0          | 0          | 0          | 0         | 0         | 0          |
| Desulfococcus      | 2              | 80             | 0          | 0          | 0          | 0         | 0         | 0         | 0         | 0         | 0          | 0          | 0          | 0          | 0         | 0         | 0          |
| Desulfohalobium    | 2              | 52             | 0          | 0          | 0          | 0         | 0         | 0         | 0         | 0         | 0          | 0          | 0          | 0          | 0         | 0         | 0          |
| Desulfomicrobium   | 2              | 65             | 0          | 0          | 0          | 0         | 0         | 0         | 0         | 0         | 0          | 0          | 0          | 0          | 0         | 0         | 0          |
| Desulfomonile      | 1              | 25             | 0          | 0          | 0          | 0         | 0         | 0         | 0         | 0         | 0          | 0          | 0          | 0          | 0         | 0         | 0          |
| Desulforhabdus     | 1              | 2              | 0          | 0          | 0          | 0         | 0         | 0         | 0         | 0         | 0          | 0          | 0          | 0          | 0         | 0         | 0          |
| Desulfosporosinus  | 1              | 30             | 0          | 0          | 0          | 0         | 0         | 0         | 0         | 0         | 0          | 0          | 0          | 0          | 0         | 0         | 0          |
| Desulfotalea       | 2              | 66             | 0          | 0          | 0          | 0         | 0         | 0         | 0         | 0         | 0          | 0          | 0          | 0          | 0         | 0         | 0          |
| Desulfotomaculum   | 2              | 98             | 0          | 0          | 0          | 0         | 0         | 1         | 0         | 0         | 0          | 0          | 0          | 0          | 0         | 0         | 0          |
| Desulfovibrio      | 2              | 144            | 0          | 0          | 0          | 0         | 0         | 0         | 0         | 0         | 0          | 0          | 0          | 0          | 0         | 0         | 0          |
| Desulfurispirillum | 2              | 78             | 0          | 0          | 0          | 0         | 0         | 0         | 0         | 0         | 0          | 0          | 0          | 0          | 0         | 0         | 0          |
| Desulfurivibrio    | 2              | 71             | 0          | 0          | 0          | 0         | 0         | 0         | 0         | 0         | 0          | 0          | 0          | 0          | 0         | 0         | 0          |
| Desulfurobacterium | 2              | 53             | 0          | 0          | 0          | 0         | 0         | 1         | 0         | 0         | 0          | 0          | 0          | 0          | 0         | 0         | 0          |
| Desulfurococcus    | 1              | 11             | 0          | 0          | 0          | 0         | 0         | 0         | 0         | 0         | 0          | 0          | 0          | 0          | 0         | 0         | 0          |
| Diaphorobacter     | 1              | 16             | 0          | 0          | 0          | 0         | 0         | 0         | 0         | 0         | 0          | 0          | 0          | 0          | 1         | 0         | 0          |
| Dichelobacter      | 2              | 45             | 0          | 0          | 0          | 0         | 0         | 1         | 0         | 0         | 0          | 0          | 0          | 0          | 0         | 0         | 0          |
| Dickeya            | 2              | 155            | 0          | 0          | 0          | 0         | 0         | 1         | 1         | 0         | 0          | 0          | 0          | 0          | 0         | 0         | 1          |
| Dictyoglomus       | 2              | 62             | 0          | 0          | 0          | 0         | 0         | 0         | 0         | 0         | 0          | 0          | 0          | 0          | 0         | 0         | 0          |
| Dinoroseobacter    | 3              | 148            | 0          | 0          | 0          | 0         | 0         | 1         | 1         | 1         | 0          | 1          | 0          | 0          | 0         | 0         | 0          |
| Dokdonia           | 1              | 3              | 0          | 0          | 0          | 0         | 0         | 0         | 0         | 0         | 0          | 0          | 0          | 0          | 0         | 0         | 0          |
| Dorea              | 1              | 7              | 0          | 0          | 0          | 0         | 0         | 0         | 0         | 0         | 0          | 0          | 0          | 0          | 0         | 0         | 0          |
| Dyadobacter        | 2              | 83             | 0          | 0          | 0          | 0         | 0         | 0         | 1         | 0         | 0          | 0          | 0          | 0          | 0         | 0         | 0          |
| Echinicola         | 1              | 20             | 0          | 0          | 0          | 0         | 0         | 0         | 0         | 0         | 0          | 0          | 0          | 0          | 0         | 0         | 0          |
| Edwardsiella       | 2              | 126            | 0          | 0          | 0          | 0         | 0         | 1         | 0         | 0         | 0          | 0          | 0          | 0          | 0         | 1         | 0          |
| Eggerthella        | 1              | 51             | 0          | 0          | 0          | 0         | 0         | 0         | 0         | 0         | 0          | 0          | 0          | 0          | 0         | 0         | 0          |
| Ehrlichia          | 2              | 37             | 0          | 0          | 0          | 0         | 0         | 1         | 0         | 0         | 0          | 0          | 0          | 0          | 0         | 0         | 0          |
| Eikenella          | 1              | 4              | 0          | 0          | 0          | 0         | 0         | 0         | 0         | 0         | 0          | 0          | 0          | 0          | 0         | 0         | 0          |
| Elusimicrobium     | 2              | 44             | 0          | 0          | 0          | 0         | 0         | 0         | 0         | 0         | 0          | 0          | 0          | 0          | 0         | 0         | 0          |
| Emticicia          | 1              | 21             | 0          | 0          | 0          | 0         | 0         | 0         | 0         | 0         | 0          | 0          | 0          | 0          | 0         | 0         | 0          |
| Enhydrobacter      | 1              | 1              | 0          | 0          | 0          | 0         | 0         | 0         | 0         | 0         | 0          | 0          | 0          | 0          | 0         | 0         | 0          |
| Ensifer            | 1              | 2              | 0          | 0          | 0          | 0         | 0         | 0         | 0         | 0         | 0          | 0          | 0          | 0          | 0         | 0         | 0          |
| Enterobacter       | 2              | 202            | 1          | 0          | 0          | 0         | 0         | 1         | 1         | 0         | 0          | 0          | 0          | 0          | 0         | 0         | 1          |
| Enterobacteriaceae | 2              | 211            | 1          | 0          | 0          | 0         | 0         | 1         | 0         | 1         | 0          | 0          | 0          | 0          | 0         | 0         | 1          |
| Enterococcus       | 1              | 187            | 1          | 0          | 0          | 0         | 0         | 1         | 0         | 1         | 0          | 0          | 0          | 0          | 0         | 0         | 1          |

| Genus               | Cluster Number | Protein Counts | 1.14.12.10 | 1.14.12.13 | 1.14.12.18 | 1.14.12.3 | 1.14.12.7 | 1.14.13.- | 1.14.13.1 | 1.14.13.2 | 1.14.13.20 | 1.14.13.22 | 1.14.13.40 | 1.14.13.50 | 1.14.13.7 | 1.14.13.8 | 1.14.13.82 |
|---------------------|----------------|----------------|------------|------------|------------|-----------|-----------|-----------|-----------|-----------|------------|------------|------------|------------|-----------|-----------|------------|
| Enterovibrio        | 1              | 15             | 0          | 0          | 0          | 0         | 0         | 0         | 0         | 0         | 0          | 0          | 0          | 0          | 0         | 0         | 0          |
| Erwinia             | 2              | 151            | 1          | 0          | 0          | 0         | 0         | 1         | 1         | 1         | 0          | 0          | 0          | 0          | 0         | 1         | 1          |
| Erysipelothrix      | 1              | 9              | 0          | 0          | 0          | 0         | 0         | 0         | 0         | 0         | 0          | 0          | 0          | 0          | 0         | 0         | 0          |
| Erysipelotrichaceae | 1              | 4              | 0          | 0          | 0          | 0         | 0         | 0         | 0         | 0         | 0          | 0          | 0          | 0          | 0         | 0         | 0          |
| Erythrobacter       | 2              | 80             | 0          | 0          | 0          | 0         | 0         | 1         | 0         | 0         | 0          | 1          | 0          | 0          | 0         | 0         | 0          |
| Escherichia         | 2              | 242            | 1          | 0          | 1          | 0         | 0         | 1         | 1         | 1         | 0          | 0          | 0          | 0          | 0         | 1         | 0          |
| Ethanoligenens      | 2              | 69             | 0          | 0          | 0          | 0         | 0         | 0         | 0         | 0         | 0          | 0          | 0          | 0          | 0         | 0         | 0          |
| Eubacteriaceae      | 1              | 2              | 0          | 0          | 0          | 0         | 0         | 0         | 0         | 0         | 0          | 0          | 0          | 0          | 0         | 0         | 0          |
| Eubacterium         | 2              | 103            | 0          | 0          | 0          | 0         | 0         | 0         | 0         | 0         | 0          | 0          | 0          | 0          | 0         | 0         | 0          |
| Eudoraea            | 1              | 4              | 0          | 0          | 0          | 0         | 0         | 0         | 0         | 0         | 0          | 0          | 0          | 0          | 0         | 0         | 0          |
| Euryarchaeota       | 1              | 1              | 0          | 0          | 0          | 0         | 0         | 0         | 0         | 0         | 0          | 0          | 0          | 0          | 0         | 0         | 0          |
| Exiguobacterium     | 2              | 93             | 0          | 0          | 0          | 0         | 0         | 1         | 0         | 0         | 0          | 0          | 0          | 0          | 0         | 0         | 0          |
| Faecalibacterium    | 1              | 12             | 0          | 0          | 0          | 0         | 0         | 0         | 0         | 0         | 0          | 0          | 0          | 0          | 0         | 0         | 0          |
| Ferrimonas          | 2              | 115            | 0          | 0          | 0          | 0         | 0         | 1         | 0         | 0         | 0          | 0          | 0          | 0          | 0         | 0         | 0          |
| Ferroglobus         | 1              | 14             | 0          | 0          | 0          | 0         | 0         | 0         | 0         | 0         | 0          | 0          | 0          | 0          | 0         | 0         | 0          |
| Ferroplasma         | 1              | 11             | 0          | 0          | 0          | 0         | 0         | 0         | 0         | 0         | 0          | 0          | 0          | 0          | 0         | 0         | 0          |
| Fervidicoccus       | 1              | 7              | 0          | 0          | 0          | 0         | 0         | 0         | 0         | 0         | 0          | 0          | 0          | 0          | 0         | 0         | 0          |
| Fervidobacterium    | 2              | 54             | 0          | 0          | 0          | 0         | 0         | 0         | 0         | 0         | 0          | 0          | 0          | 0          | 0         | 0         | 0          |
| Fibrella            | 1              | 17             | 0          | 0          | 0          | 0         | 0         | 0         | 0         | 0         | 0          | 0          | 0          | 0          | 0         | 0         | 0          |
| Fibrobacter         | 2              | 52             | 0          | 0          | 0          | 0         | 0         | 0         | 0         | 0         | 0          | 0          | 0          | 0          | 0         | 0         | 0          |
| Filifactor          | 1              | 9              | 0          | 0          | 0          | 0         | 0         | 0         | 0         | 0         | 0          | 0          | 0          | 0          | 0         | 0         | 0          |
| Finegoldia          | 2              | 55             | 0          | 0          | 0          | 0         | 0         | 0         | 0         | 0         | 0          | 0          | 0          | 0          | 0         | 0         | 0          |
| Firmicutes          | 1              | 15             | 0          | 0          | 0          | 0         | 0         | 0         | 0         | 0         | 0          | 0          | 0          | 0          | 0         | 0         | 0          |
| Fischerella         | 1              | 15             | 0          | 0          | 0          | 0         | 0         | 0         | 0         | 0         | 0          | 0          | 0          | 0          | 0         | 0         | 0          |
| Flavobacteria       | 1              | 7              | 0          | 0          | 0          | 0         | 0         | 0         | 0         | 0         | 0          | 0          | 0          | 0          | 0         | 0         | 0          |
| Flavobacteriaceae   | 2              | 69             | 0          | 0          | 0          | 0         | 0         | 0         | 0         | 0         | 0          | 0          | 0          | 0          | 0         | 0         | 0          |
| Flavobacteriales    | 1              | 3              | 0          | 0          | 0          | 0         | 0         | 0         | 0         | 0         | 0          | 0          | 0          | 0          | 0         | 0         | 0          |
| Flavobacterium      | 2              | 103            | 0          | 0          | 0          | 0         | 0         | 1         | 0         | 0         | 0          | 0          | 0          | 0          | 0         | 0         | 0          |
| Flexibacter         | 1              | 17             | 0          | 0          | 0          | 0         | 0         | 0         | 0         | 0         | 0          | 0          | 0          | 0          | 0         | 0         | 0          |
| Flexistipes         | 1              | 11             | 0          | 0          | 0          | 0         | 0         | 0         | 0         | 0         | 0          | 0          | 0          | 0          | 0         | 0         | 0          |
| Fluoribacter        | 1              | 6              | 0          | 0          | 0          | 0         | 0         | 0         | 0         | 0         | 0          | 0          | 0          | 0          | 0         | 0         | 0          |
| Fluviicola          | 2              | 69             | 0          | 0          | 0          | 0         | 0         | 1         | 0         | 0         | 0          | 0          | 0          | 0          | 0         | 0         | 0          |
| Formosa             | 1              | 2              | 0          | 0          | 0          | 0         | 0         | 0         | 0         | 0         | 0          | 0          | 0          | 0          | 0         | 0         | 0          |
| Francisella         | 2              | 88             | 0          | 0          | 0          | 0         | 0         | 1         | 0         | 0         | 0          | 0          | 0          | 0          | 1         | 0         | 0          |
| Frankia             | 3              | 202            | 1          | 0          | 1          | 0         | 0         | 1         | 1         | 1         | 0          | 1          | 0          | 0          | 0         | 0         | 1          |
| Frateuria           | 1              | 25             | 0          | 0          | 0          | 0         | 0         | 0         | 0         | 0         | 0          | 0          | 0          | 0          | 0         | 0         | 0          |
| Fructobacillus      | 1              | 2              | 0          | 0          | 0          | 0         | 0         | 0         | 0         | 0         | 0          | 0          | 0          | 0          | 0         | 0         | 0          |
| Fulvimarina         | 1              | 2              | 0          | 0          | 0          | 0         | 0         | 0         | 0         | 0         | 0          | 0          | 0          | 0          | 0         | 0         | 0          |
| Fusobacterium       | 1              | 48             | 0          | 0          | 0          | 0         | 0         | 0         | 0         | 0         | 0          | 0          | 0          | 0          | 0         | 0         | 0          |
| Gallibacterium      | 2              | 87             | 0          | 0          | 0          | 0         | 0         | 1         | 0         | 0         | 0          | 0          | 0          | 0          | 0         | 0         | 0          |
| Gallionella         | 2              | 67             | 0          | 0          | 0          | 0         | 0         | 1         | 0         | 0         | 0          | 0          | 0          | 0          | 0         | 0         | 0          |
| Gammaproteobacteria | 1              | 9              | 0          | 0          | 0          | 0         | 0         | 0         | 0         | 0         | 0          | 0          | 0          | 0          | 0         | 0         | 1          |
| Gardnerella         | 1              | 31             | 0          | 0          | 0          | 0         | 0         | 0         | 0         | 0         | 0          | 0          | 0          | 0          | 0         | 0         | 0          |
| Geitlerinema        | 1              | 9              | 0          | 0          | 0          | 0         | 0         | 0         | 0         | 0         | 0          | 0          | 0          | 0          | 0         | 0         | 0          |
| Gemmatimonas        | 2              | 93             | 0          | 0          | 0          | 0         | 0         | 1         | 1         | 0         | 0          | 0          | 1          | 0          | 0         | 0         | 0          |
| Geobacillus         | 2              | 168            | 0          | 0          | 0          | 0         | 0         | 1         | 0         | 0         | 0          | 0          | 0          | 0          | 0         | 0         | 0          |
| Geobacter           | 2              | 150            | 0          | 0          | 0          | 0         | 0         | 0         | 0         | 0         | 0          | 0          | 0          | 0          | 0         | 0         | 0          |
| Geodermatophilus    | 2              | 136            | 1          | 0          | 0          | 0         | 0         | 1         | 1         | 1         | 0          | 1          | 0          | 0          | 0         | 0         | 1          |
| Geopsychrobacter    | 1              | 2              | 0          | 0          | 0          | 0         | 0         | 0         | 0         | 0         | 0          | 0          | 0          | 0          | 0         | 0         | 0          |
| Gillisia            | 1              | 11             | 0          | 0          | 0          | 0         | 0         | 0         | 0         | 0         | 0          | 0          | 0          | 0          | 0         | 0         | 0          |
| Gilvimarinus        | 1              | 4              | 0          | 0          | 0          | 0         | 0         | 0         | 0         | 0         | 0          | 0          | 0          | 0          | 0         | 0         | 0          |
| Glaciecola          | 2              | 117            | 0          | 0          | 0          | 0         | 0         | 1         | 1         | 0         | 0          | 0          | 0          | 0          | 0         | 0         | 0          |

| Genus             | Cluster Number | Protein Counts | 1.14.12.10 | 1.14.12.13 | 1.14.12.18 | 1.14.12.3 | 1.14.12.7 | 1.14.13.- | 1.14.13.1 | 1.14.13.2 | 1.14.13.20 | 1.14.13.22 | 1.14.13.40 | 1.14.13.50 | 1.14.13.7 | 1.14.13.8 | 1.14.13.82 |
|-------------------|----------------|----------------|------------|------------|------------|-----------|-----------|-----------|-----------|-----------|------------|------------|------------|------------|-----------|-----------|------------|
| Gloeobacter       | 2              | 67             | 0          | 0          | 0          | 0         | 0         | 0         | 0         | 0         | 0          | 0          | 0          | 0          | 0         | 0         | 0          |
| Gloeocapsa        | 1              | 20             | 0          | 0          | 0          | 0         | 0         | 0         | 0         | 0         | 0          | 0          | 0          | 0          | 0         | 0         | 0          |
| Gloeotheca        | 1              | 1              | 0          | 0          | 0          | 0         | 0         | 0         | 0         | 0         | 0          | 0          | 0          | 0          | 0         | 0         | 0          |
| Gluconacetobacter | 2              | 96             | 0          | 0          | 0          | 0         | 0         | 1         | 0         | 0         | 0          | 0          | 0          | 0          | 0         | 0         | 0          |
| Gluconobacter     | 2              | 76             | 0          | 0          | 0          | 0         | 0         | 1         | 0         | 0         | 0          | 0          | 0          | 0          | 0         | 0         | 1          |
| Gordonia          | 1              | 158            | 1          | 0          | 0          | 0         | 0         | 1         | 1         | 0         | 0          | 1          | 0          | 0          | 0         | 0         | 0          |
| Gordonibacter     | 1              | 32             | 0          | 0          | 0          | 0         | 0         | 0         | 0         | 0         | 0          | 0          | 0          | 0          | 0         | 0         | 0          |
| Gramella          | 2              | 104            | 0          | 0          | 0          | 0         | 0         | 1         | 0         | 0         | 0          | 0          | 0          | 0          | 0         | 0         | 0          |
| Granulibacter     | 2              | 90             | 0          | 0          | 0          | 0         | 0         | 1         | 0         | 0         | 0          | 0          | 0          | 0          | 0         | 0         | 1          |
| Granulicella      | 2              | 98             | 0          | 0          | 0          | 0         | 0         | 1         | 0         | 0         | 0          | 0          | 0          | 0          | 0         | 0         | 0          |
| Grimontia         | 1              | 9              | 0          | 0          | 0          | 0         | 0         | 0         | 0         | 0         | 0          | 0          | 0          | 0          | 0         | 0         | 0          |
| Haemophilus       | 2              | 117            | 0          | 0          | 0          | 0         | 0         | 1         | 0         | 0         | 0          | 0          | 0          | 0          | 0         | 0         | 0          |
| Hafnia            | 1              | 29             | 0          | 0          | 0          | 0         | 0         | 0         | 0         | 0         | 0          | 0          | 0          | 0          | 0         | 0         | 0          |
| Hahella           | 3              | 130            | 0          | 0          | 0          | 0         | 0         | 1         | 0         | 0         | 0          | 1          | 0          | 0          | 0         | 0         | 0          |
| Halalkalicoccus   | 1              | 18             | 0          | 0          | 0          | 0         | 0         | 0         | 0         | 0         | 0          | 0          | 0          | 0          | 0         | 0         | 0          |
| Halanaerobium     | 2              | 89             | 0          | 0          | 0          | 0         | 0         | 0         | 0         | 0         | 0          | 0          | 0          | 0          | 0         | 0         | 0          |
| Haliangium        | 2              | 108            | 0          | 0          | 0          | 0         | 0         | 0         | 0         | 0         | 0          | 1          | 1          | 0          | 0         | 0         | 1          |
| Haliscomenobacter | 2              | 107            | 0          | 0          | 0          | 0         | 0         | 1         | 1         | 1         | 0          | 0          | 0          | 0          | 0         | 0         | 0          |
| Haloarcula        | 1              | 22             | 0          | 0          | 0          | 0         | 0         | 0         | 0         | 0         | 0          | 0          | 0          | 0          | 0         | 0         | 0          |
| Halobacillus      | 1              | 19             | 0          | 0          | 0          | 0         | 0         | 0         | 0         | 0         | 0          | 0          | 0          | 0          | 0         | 0         | 0          |
| Halobacteriaceae  | 1              | 1              | 0          | 0          | 0          | 0         | 0         | 0         | 0         | 0         | 0          | 0          | 0          | 0          | 0         | 0         | 0          |
| Halobacterium     | 1              | 10             | 0          | 0          | 0          | 0         | 0         | 0         | 0         | 0         | 0          | 0          | 0          | 0          | 0         | 0         | 0          |
| Halobacteroides   | 1              | 14             | 0          | 0          | 0          | 0         | 0         | 0         | 0         | 0         | 0          | 0          | 0          | 0          | 0         | 0         | 0          |
| Haloferax         | 1              | 20             | 0          | 0          | 0          | 0         | 0         | 0         | 0         | 0         | 0          | 0          | 0          | 0          | 0         | 0         | 0          |
| Halogeometricum   | 1              | 12             | 0          | 0          | 0          | 0         | 0         | 0         | 0         | 0         | 0          | 0          | 0          | 0          | 0         | 0         | 0          |
| Halomicrobium     | 1              | 10             | 0          | 0          | 0          | 0         | 0         | 0         | 0         | 0         | 0          | 0          | 0          | 0          | 0         | 0         | 0          |
| Halomonas         | 1              | 149            | 0          | 0          | 0          | 0         | 0         | 1         | 0         | 1         | 0          | 0          | 0          | 0          | 0         | 0         | 0          |
| Halopiger         | 1              | 16             | 0          | 0          | 0          | 0         | 0         | 0         | 0         | 0         | 0          | 0          | 0          | 0          | 0         | 0         | 0          |
| Haloquadratum     | 1              | 19             | 0          | 0          | 0          | 0         | 0         | 0         | 0         | 0         | 0          | 0          | 0          | 0          | 0         | 0         | 0          |
| Halorhabdus       | 1              | 10             | 0          | 0          | 0          | 0         | 0         | 0         | 0         | 0         | 0          | 0          | 0          | 0          | 0         | 0         | 0          |
| Halorhodospira    | 2              | 71             | 0          | 0          | 0          | 0         | 0         | 1         | 0         | 0         | 0          | 0          | 0          | 0          | 0         | 0         | 0          |
| Halorubrum        | 1              | 16             | 0          | 0          | 0          | 0         | 0         | 0         | 0         | 0         | 0          | 0          | 0          | 0          | 0         | 0         | 0          |
| Haloterrigena     | 1              | 19             | 0          | 0          | 0          | 0         | 0         | 0         | 0         | 0         | 0          | 0          | 0          | 0          | 0         | 0         | 0          |
| Halothece         | 1              | 9              | 0          | 0          | 0          | 0         | 0         | 0         | 0         | 0         | 0          | 0          | 0          | 0          | 0         | 0         | 0          |
| Halothermothrix   | 2              | 50             | 0          | 0          | 0          | 0         | 0         | 0         | 0         | 0         | 0          | 0          | 0          | 0          | 0         | 0         | 0          |
| Halothiobacillus  | 2              | 65             | 0          | 0          | 0          | 0         | 0         | 1         | 0         | 0         | 0          | 0          | 0          | 0          | 0         | 0         | 0          |
| Halovivax         | 1              | 12             | 0          | 0          | 0          | 0         | 0         | 0         | 0         | 0         | 0          | 0          | 0          | 0          | 0         | 0         | 0          |
| Helicobacter      | 2              | 79             | 0          | 0          | 0          | 0         | 0         | 1         | 0         | 0         | 0          | 0          | 0          | 0          | 0         | 0         | 0          |
| Heliobacillus     | 1              | 4              | 0          | 0          | 0          | 0         | 0         | 0         | 0         | 0         | 0          | 0          | 0          | 0          | 0         | 0         | 0          |
| Heliobacterium    | 2              | 51             | 0          | 0          | 0          | 0         | 0         | 0         | 0         | 0         | 0          | 0          | 0          | 0          | 0         | 0         | 0          |
| Herbaspirillum    | 2              | 172            | 1          | 0          | 1          | 0         | 0         | 1         | 1         | 1         | 0          | 0          | 0          | 0          | 0         | 0         | 1          |
| Herminiimonas     | 3              | 89             | 1          | 0          | 0          | 0         | 0         | 1         | 0         | 0         | 0          | 0          | 0          | 0          | 0         | 0         | 0          |
| Herpetosiphon     | 3              | 90             | 0          | 0          | 0          | 0         | 0         | 1         | 1         | 0         | 0          | 0          | 0          | 0          | 0         | 0         | 0          |
| Hippea            | 2              | 44             | 0          | 0          | 0          | 0         | 0         | 0         | 0         | 0         | 0          | 0          | 0          | 0          | 0         | 0         | 0          |
| Hirschia          | 2              | 102            | 0          | 0          | 0          | 0         | 0         | 1         | 1         | 0         | 0          | 0          | 0          | 0          | 0         | 0         | 0          |
| Histophilus       | 2              | 72             | 0          | 0          | 0          | 0         | 0         | 1         | 0         | 0         | 0          | 0          | 0          | 0          | 0         | 0         | 0          |
| Hoeflea           | 1              | 16             | 0          | 0          | 0          | 0         | 0         | 0         | 0         | 0         | 0          | 0          | 0          | 0          | 0         | 0         | 0          |
| Hydrogenivirga    | 1              | 2              | 0          | 0          | 0          | 0         | 0         | 0         | 0         | 0         | 0          | 0          | 0          | 0          | 0         | 0         | 0          |
| Hydrogenobacter   | 2              | 55             | 0          | 0          | 0          | 0         | 0         | 0         | 0         | 0         | 0          | 0          | 0          | 0          | 0         | 0         | 0          |
| Hydrogenobaculum  | 2              | 44             | 0          | 0          | 0          | 0         | 0         | 0         | 0         | 0         | 0          | 0          | 0          | 0          | 0         | 0         | 0          |
| Hydrogenophaga    | 1              | 9              | 0          | 0          | 0          | 0         | 0         | 0         | 0         | 0         | 0          | 0          | 0          | 0          | 0         | 0         | 0          |
| Hylemonella       | 1              | 4              | 0          | 0          | 0          | 0         | 0         | 0         | 0         | 0         | 0          | 0          | 0          | 0          | 0         | 0         | 0          |



| Genus                 | Cluster Number | Protein Counts | 1.14.12.10 | 1.14.12.13 | 1.14.12.18 | 1.14.12.3 | 1.14.12.7 | 1.14.13.- | 1.14.13.1 | 1.14.13.2 | 1.14.13.20 | 1.14.13.22 | 1.14.13.40 | 1.14.13.50 | 1.14.13.7 | 1.14.13.8 | 1.14.13.82 |
|-----------------------|----------------|----------------|------------|------------|------------|-----------|-----------|-----------|-----------|-----------|------------|------------|------------|------------|-----------|-----------|------------|
| Hyperthermus          | 1              | 6              | 0          | 0          | 0          | 0         | 0         | 0         | 0         | 0         | 0          | 0          | 0          | 0          | 0         | 0         | 0          |
| Hyphomicrobium        | 2              | 93             | 0          | 0          | 0          | 0         | 0         | 1         | 0         | 0         | 0          | 0          | 0          | 0          | 0         | 0         | 0          |
| Hyphomonas            | 3              | 105            | 0          | 0          | 0          | 0         | 0         | 1         | 1         | 0         | 0          | 1          | 0          | 0          | 0         | 0         | 0          |
| Ideonella             | 1              | 18             | 0          | 0          | 0          | 0         | 0         | 0         | 0         | 0         | 0          | 0          | 0          | 0          | 1         | 0         | 0          |
| Idiomarina            | 2              | 86             | 0          | 0          | 0          | 0         | 0         | 1         | 0         | 0         | 0          | 0          | 0          | 0          | 0         | 0         | 0          |
| Ignavibacterium       | 1              | 14             | 0          | 0          | 0          | 0         | 0         | 0         | 0         | 0         | 0          | 0          | 0          | 0          | 0         | 0         | 0          |
| Ignicoccus            | 1              | 5              | 0          | 0          | 0          | 0         | 0         | 0         | 0         | 0         | 0          | 0          | 0          | 0          | 0         | 0         | 0          |
| Ignisphaera           | 1              | 8              | 0          | 0          | 0          | 0         | 0         | 0         | 0         | 0         | 0          | 0          | 0          | 0          | 0         | 0         | 0          |
| Ilyobacter            | 2              | 85             | 0          | 0          | 0          | 0         | 0         | 0         | 0         | 0         | 0          | 0          | 0          | 0          | 0         | 0         | 0          |
| Intrasporangium       | 2              | 114            | 0          | 0          | 0          | 0         | 0         | 1         | 1         | 0         | 0          | 0          | 0          | 0          | 0         | 0         | 0          |
| Isoptericola          | 1              | 18             | 0          | 0          | 0          | 0         | 0         | 0         | 0         | 0         | 0          | 0          | 0          | 0          | 0         | 0         | 0          |
| Isosphaera            | 2              | 75             | 0          | 0          | 0          | 0         | 0         | 0         | 0         | 0         | 0          | 0          | 0          | 0          | 0         | 0         | 0          |
| Jannaschia            | 3              | 151            | 0          | 0          | 0          | 0         | 0         | 1         | 1         | 1         | 0          | 0          | 1          | 0          | 0         | 0         | 1          |
| Janthinobacterium     | 2              | 99             | 1          | 0          | 0          | 0         | 0         | 1         | 0         | 0         | 0          | 0          | 0          | 0          | 0         | 0         | 1          |
| Jonesia               | 2              | 56             | 0          | 0          | 0          | 0         | 0         | 0         | 0         | 0         | 0          | 0          | 0          | 0          | 0         | 0         | 0          |
| Joostella             | 1              | 3              | 0          | 0          | 0          | 0         | 0         | 0         | 0         | 0         | 0          | 0          | 0          | 0          | 0         | 0         | 0          |
| Kaistia               | 1              | 2              | 0          | 0          | 0          | 0         | 0         | 0         | 0         | 0         | 0          | 0          | 0          | 0          | 0         | 0         | 0          |
| Kangiella             | 2              | 84             | 0          | 0          | 0          | 0         | 0         | 1         | 0         | 0         | 0          | 0          | 0          | 0          | 0         | 0         | 0          |
| Ketogulonicigenium    | 2              | 102            | 0          | 0          | 0          | 0         | 0         | 1         | 1         | 1         | 0          | 1          | 0          | 0          | 0         | 0         | 0          |
| Kineococcus           | 1              | 24             | 0          | 0          | 0          | 0         | 0         | 0         | 0         | 0         | 0          | 0          | 0          | 0          | 0         | 0         | 0          |
| Kinetoplastibacterium | 1              | 2              | 0          | 0          | 0          | 0         | 0         | 0         | 0         | 0         | 0          | 0          | 0          | 0          | 0         | 0         | 0          |
| Kingella              | 1              | 4              | 0          | 0          | 0          | 0         | 0         | 0         | 0         | 0         | 0          | 0          | 0          | 0          | 0         | 0         | 0          |
| Kitasatospora         | 1              | 36             | 0          | 0          | 0          | 0         | 0         | 0         | 0         | 0         | 0          | 0          | 0          | 0          | 0         | 0         | 0          |
| Klebsiella            | 3              | 222            | 1          | 0          | 0          | 0         | 0         | 1         | 1         | 1         | 0          | 0          | 0          | 0          | 0         | 0         | 1          |
| Kluyvera              | 1              | 1              | 0          | 0          | 0          | 0         | 0         | 0         | 0         | 0         | 0          | 0          | 0          | 0          | 0         | 0         | 0          |
| Kocuria               | 2              | 87             | 0          | 0          | 0          | 0         | 0         | 1         | 0         | 0         | 0          | 0          | 0          | 0          | 0         | 0         | 0          |
| Kordia                | 1              | 5              | 0          | 0          | 0          | 0         | 0         | 0         | 0         | 0         | 0          | 0          | 0          | 0          | 0         | 0         | 0          |
| Kosmotoga             | 2              | 61             | 0          | 0          | 0          | 0         | 0         | 1         | 0         | 0         | 0          | 0          | 0          | 0          | 0         | 0         | 0          |
| Kribbella             | 2              | 99             | 0          | 0          | 0          | 0         | 0         | 1         | 0         | 0         | 0          | 1          | 0          | 0          | 0         | 0         | 0          |
| Krokinobacter         | 2              | 90             | 0          | 0          | 0          | 0         | 0         | 1         | 0         | 0         | 0          | 0          | 0          | 0          | 0         | 0         | 0          |
| Kyrpidia              | 2              | 113            | 0          | 0          | 1          | 0         | 0         | 1         | 0         | 0         | 0          | 0          | 0          | 0          | 1         | 0         | 0          |
| Kytococcus            | 2              | 70             | 0          | 0          | 0          | 0         | 0         | 0         | 1         | 0         | 0          | 0          | 0          | 0          | 0         | 0         | 0          |
| Labrenzia             | 1              | 4              | 0          | 0          | 0          | 0         | 0         | 0         | 0         | 0         | 0          | 0          | 0          | 0          | 0         | 0         | 0          |
| Lachnoanaerobaculum   | 1              | 1              | 0          | 0          | 0          | 0         | 0         | 0         | 0         | 0         | 0          | 0          | 0          | 0          | 0         | 0         | 0          |
| Lachnospiraceae       | 1              | 51             | 0          | 0          | 0          | 0         | 0         | 0         | 0         | 0         | 0          | 0          | 0          | 0          | 0         | 0         | 0          |
| Lacinutrix            | 1              | 20             | 0          | 0          | 0          | 0         | 0         | 0         | 0         | 0         | 0          | 0          | 0          | 0          | 0         | 0         | 0          |
| Lactobacillus         | 2              | 119            | 0          | 0          | 0          | 0         | 0         | 1         | 0         | 0         | 0          | 0          | 0          | 0          | 0         | 0         | 0          |
| Lactococcus           | 2              | 82             | 0          | 0          | 0          | 0         | 0         | 1         | 0         | 0         | 0          | 0          | 0          | 0          | 0         | 0         | 0          |
| Lamprocystis          | 1              | 2              | 0          | 0          | 0          | 0         | 0         | 0         | 0         | 0         | 0          | 0          | 0          | 0          | 0         | 0         | 0          |
| Laribacter            | 2              | 80             | 0          | 0          | 0          | 0         | 0         | 1         | 0         | 0         | 0          | 0          | 0          | 0          | 0         | 0         | 0          |
| Lawsonia              | 2              | 33             | 0          | 0          | 0          | 0         | 0         | 0         | 0         | 0         | 0          | 0          | 0          | 0          | 0         | 0         | 0          |
| Leadbetterella        | 2              | 79             | 0          | 0          | 0          | 0         | 0         | 0         | 0         | 0         | 0          | 0          | 0          | 0          | 0         | 0         | 0          |
| Leeuwenhoekiiella     | 1              | 2              | 0          | 0          | 0          | 0         | 0         | 0         | 0         | 0         | 0          | 0          | 0          | 0          | 0         | 0         | 0          |
| Legionella            | 2              | 117            | 1          | 0          | 0          | 0         | 0         | 1         | 0         | 0         | 0          | 0          | 0          | 0          | 0         | 0         | 0          |
| Leifsonia             | 2              | 48             | 0          | 0          | 0          | 0         | 0         | 0         | 0         | 0         | 0          | 0          | 0          | 0          | 0         | 0         | 0          |
| Leptolyngbya          | 1              | 10             | 0          | 0          | 0          | 0         | 0         | 0         | 0         | 0         | 0          | 0          | 0          | 0          | 0         | 0         | 0          |
| Leptospira            | 2              | 76             | 0          | 0          | 0          | 0         | 0         | 1         | 0         | 0         | 0          | 1          | 0          | 0          | 0         | 0         | 0          |
| Leptospirillum        | 1              | 10             | 0          | 0          | 0          | 0         | 0         | 0         | 0         | 0         | 0          | 0          | 0          | 0          | 0         | 0         | 0          |
| Leptothrix            | 3              | 186            | 0          | 0          | 0          | 0         | 0         | 1         | 0         | 1         | 0          | 0          | 0          | 0          | 1         | 0         | 0          |
| Leptotrichia          | 2              | 43             | 0          | 0          | 0          | 0         | 0         | 0         | 0         | 0         | 0          | 0          | 0          | 0          | 0         | 0         | 0          |
| Leucobacter           | 1              | 2              | 0          | 0          | 0          | 0         | 0         | 0         | 0         | 0         | 0          | 0          | 0          | 0          | 0         | 0         | 0          |
| Leuconostoc           | 2              | 64             | 0          | 0          | 0          | 0         | 0         | 0         | 0         | 0         | 0          | 0          | 0          | 0          | 0         | 0         | 0          |

| Genus                | Cluster Number | Protein Counts | 1.14.12.10 | 1.14.12.13 | 1.14.12.18 | 1.14.12.3 | 1.14.12.7 | 1.14.13.- | 1.14.13.1 | 1.14.13.2 | 1.14.13.20 | 1.14.13.22 | 1.14.13.40 | 1.14.13.50 | 1.14.13.7 | 1.14.13.8 | 1.14.13.82 |
|----------------------|----------------|----------------|------------|------------|------------|-----------|-----------|-----------|-----------|-----------|------------|------------|------------|------------|-----------|-----------|------------|
| Liberibacter         | 1              | 4              | 0          | 0          | 0          | 0         | 0         | 0         | 0         | 0         | 0          | 0          | 0          | 0          | 0         | 0         | 0          |
| Limnohabitans        | 1              | 11             | 0          | 0          | 0          | 0         | 0         | 0         | 0         | 0         | 0          | 0          | 0          | 0          | 0         | 0         | 0          |
| Listeria             | 2              | 77             | 0          | 0          | 0          | 0         | 0         | 1         | 0         | 0         | 0          | 0          | 0          | 0          | 0         | 0         | 0          |
| Listeriaceae         | 1              | 6              | 0          | 0          | 0          | 0         | 0         | 0         | 0         | 0         | 0          | 0          | 0          | 0          | 0         | 0         | 0          |
| Listonella           | 1              | 38             | 0          | 0          | 0          | 0         | 0         | 0         | 0         | 0         | 0          | 0          | 0          | 0          | 0         | 0         | 0          |
| Loktanella           | 1              | 3              | 0          | 0          | 0          | 0         | 0         | 0         | 0         | 0         | 0          | 0          | 0          | 0          | 0         | 0         | 0          |
| Lysinibacillus       | 2              | 97             | 0          | 0          | 0          | 0         | 0         | 1         | 0         | 0         | 0          | 0          | 0          | 0          | 0         | 0         | 0          |
| Macrococcus          | 2              | 60             | 0          | 0          | 0          | 0         | 0         | 0         | 1         | 0         | 0          | 0          | 0          | 0          | 0         | 0         | 0          |
| Magnetococcus        | 2              | 64             | 0          | 0          | 0          | 0         | 0         | 0         | 0         | 0         | 0          | 0          | 0          | 0          | 0         | 0         | 0          |
| Magnetospirillum     | 2              | 113            | 0          | 0          | 0          | 0         | 0         | 1         | 0         | 1         | 0          | 0          | 0          | 0          | 0         | 0         | 0          |
| Mahella              | 2              | 58             | 0          | 0          | 0          | 0         | 0         | 0         | 0         | 0         | 0          | 0          | 0          | 0          | 0         | 0         | 0          |
| Mannheimia           | 2              | 85             | 0          | 0          | 0          | 0         | 0         | 0         | 0         | 0         | 0          | 0          | 0          | 0          | 0         | 0         | 0          |
| Maribacter           | 3              | 87             | 0          | 0          | 0          | 0         | 0         | 0         | 0         | 0         | 0          | 0          | 0          | 0          | 0         | 0         | 0          |
| Maricaulis           | 3              | 87             | 1          | 0          | 0          | 0         | 0         | 1         | 0         | 0         | 0          | 1          | 1          | 0          | 0         | 0         | 1          |
| Marichromatium       | 1              | 2              | 0          | 0          | 0          | 0         | 0         | 0         | 0         | 0         | 0          | 0          | 0          | 0          | 0         | 0         | 0          |
| Marinithermus        | 2              | 77             | 0          | 0          | 0          | 0         | 0         | 0         | 0         | 0         | 0          | 0          | 0          | 0          | 0         | 0         | 0          |
| Marinitoga           | 1              | 15             | 0          | 0          | 0          | 0         | 0         | 0         | 0         | 0         | 0          | 0          | 0          | 0          | 0         | 0         | 0          |
| Marinobacter         | 2              | 163            | 1          | 0          | 1          | 0         | 0         | 1         | 0         | 0         | 0          | 1          | 0          | 0          | 1         | 0         | 1          |
| Marinomonas          | 3              | 192            | 1          | 0          | 1          | 0         | 0         | 1         | 1         | 1         | 0          | 1          | 0          | 0          | 0         | 0         | 1          |
| Maritimibacter       | 1              | 7              | 0          | 0          | 0          | 0         | 0         | 0         | 0         | 0         | 0          | 0          | 0          | 0          | 0         | 0         | 0          |
| Marivirga            | 2              | 96             | 0          | 0          | 0          | 0         | 0         | 1         | 1         | 0         | 0          | 0          | 0          | 0          | 0         | 0         | 0          |
| Martelella           | 1              | 3              | 0          | 0          | 0          | 0         | 0         | 0         | 0         | 0         | 0          | 0          | 0          | 0          | 0         | 0         | 0          |
| Marvinbryantia       | 1              | 1              | 0          | 0          | 0          | 0         | 0         | 0         | 0         | 0         | 0          | 0          | 0          | 0          | 0         | 0         | 0          |
| Massilia             | 1              | 4              | 0          | 0          | 0          | 0         | 0         | 0         | 0         | 0         | 0          | 0          | 0          | 0          | 0         | 0         | 0          |
| Mastigocladopsis     | 1              | 16             | 0          | 0          | 0          | 0         | 0         | 0         | 0         | 0         | 0          | 0          | 0          | 0          | 0         | 0         | 0          |
| Megamonas            | 1              | 47             | 0          | 0          | 0          | 0         | 0         | 0         | 0         | 0         | 0          | 0          | 0          | 0          | 0         | 0         | 0          |
| Megasphaera          | 1              | 14             | 0          | 0          | 0          | 0         | 0         | 0         | 0         | 0         | 0          | 0          | 0          | 0          | 0         | 0         | 0          |
| Meiothermus          | 2              | 110            | 0          | 0          | 0          | 0         | 0         | 1         | 1         | 1         | 0          | 0          | 1          | 0          | 0         | 0         | 0          |
| Melissococcus        | 2              | 46             | 0          | 0          | 0          | 0         | 0         | 0         | 0         | 0         | 0          | 0          | 0          | 0          | 0         | 0         | 0          |
| Mesoflavibacter      | 1              | 6              | 0          | 0          | 0          | 0         | 0         | 0         | 0         | 0         | 0          | 0          | 0          | 0          | 0         | 0         | 0          |
| Mesoplasma           | 1              | 23             | 0          | 0          | 0          | 0         | 0         | 0         | 0         | 0         | 0          | 0          | 0          | 0          | 0         | 0         | 0          |
| Mesorhizobium        | 2              | 201            | 1          | 0          | 0          | 0         | 0         | 1         | 1         | 1         | 0          | 0          | 1          | 0          | 0         | 0         | 1          |
| Mesotoga             | 1              | 14             | 0          | 0          | 0          | 0         | 0         | 0         | 0         | 0         | 0          | 0          | 0          | 0          | 0         | 0         | 0          |
| Metallosphaera       | 1              | 18             | 0          | 0          | 0          | 0         | 0         | 0         | 0         | 0         | 0          | 0          | 0          | 0          | 0         | 0         | 0          |
| Methanobacterium     | 1              | 7              | 0          | 0          | 0          | 0         | 0         | 0         | 0         | 0         | 0          | 0          | 0          | 0          | 0         | 0         | 0          |
| Methanobrevibacter   | 1              | 9              | 0          | 0          | 0          | 0         | 0         | 0         | 0         | 0         | 0          | 0          | 0          | 0          | 0         | 0         | 0          |
| Methanocaldococcus   | 1              | 6              | 0          | 0          | 0          | 0         | 0         | 0         | 0         | 0         | 0          | 0          | 0          | 0          | 0         | 0         | 0          |
| Methanocella         | 1              | 15             | 0          | 0          | 0          | 0         | 0         | 0         | 0         | 0         | 0          | 0          | 0          | 0          | 0         | 0         | 0          |
| Methanococcaceae     | 1              | 1              | 0          | 0          | 0          | 0         | 0         | 0         | 0         | 0         | 0          | 0          | 0          | 0          | 0         | 0         | 0          |
| Methanococcoides     | 1              | 5              | 0          | 0          | 0          | 0         | 0         | 0         | 0         | 0         | 0          | 0          | 0          | 0          | 0         | 0         | 0          |
| Methanococcus        | 1              | 9              | 0          | 0          | 0          | 0         | 0         | 0         | 0         | 0         | 0          | 0          | 0          | 0          | 0         | 0         | 0          |
| Methanocorpusculum   | 1              | 7              | 0          | 0          | 0          | 0         | 0         | 0         | 0         | 0         | 0          | 0          | 0          | 0          | 0         | 0         | 0          |
| Methanoculleus       | 1              | 8              | 0          | 0          | 0          | 0         | 0         | 0         | 0         | 0         | 0          | 0          | 0          | 0          | 0         | 0         | 0          |
| Methanohalobium      | 1              | 5              | 0          | 0          | 0          | 0         | 0         | 0         | 0         | 0         | 0          | 0          | 0          | 0          | 0         | 0         | 0          |
| Methanohalophilus    | 1              | 5              | 0          | 0          | 0          | 0         | 0         | 0         | 0         | 0         | 0          | 0          | 0          | 0          | 0         | 0         | 0          |
| Methanolobus         | 1              | 5              | 0          | 0          | 0          | 0         | 0         | 0         | 0         | 0         | 0          | 0          | 0          | 0          | 0         | 0         | 0          |
| Methanomethylovorans | 1              | 5              | 0          | 0          | 0          | 0         | 0         | 0         | 0         | 0         | 0          | 0          | 0          | 0          | 0         | 0         | 0          |
| Methanoplanus        | 1              | 7              | 0          | 0          | 0          | 0         | 0         | 0         | 0         | 0         | 0          | 0          | 0          | 0          | 0         | 0         | 0          |
| Methanopyrus         | 1              | 4              | 0          | 0          | 0          | 0         | 0         | 0         | 0         | 0         | 0          | 0          | 0          | 0          | 0         | 0         | 0          |
| Methanoregula        | 1              | 8              | 0          | 0          | 0          | 0         | 0         | 0         | 0         | 0         | 0          | 0          | 0          | 0          | 0         | 0         | 0          |
| Methanosaeta         | 1              | 9              | 0          | 0          | 0          | 0         | 0         | 0         | 0         | 0         | 0          | 0          | 0          | 0          | 0         | 0         | 0          |
| Methanosalsum        | 1              | 7              | 0          | 0          | 0          | 0         | 0         | 0         | 0         | 0         | 0          | 0          | 0          | 0          | 0         | 0         | 0          |

| Genus               | Cluster Number | Protein Counts | 1.14.12.10 | 1.14.12.13 | 1.14.12.18 | 1.14.12.3 | 1.14.12.7 | 1.14.13.- | 1.14.13.1 | 1.14.13.2 | 1.14.13.20 | 1.14.13.22 | 1.14.13.40 | 1.14.13.50 | 1.14.13.7 | 1.14.13.8 | 1.14.13.82 |
|---------------------|----------------|----------------|------------|------------|------------|-----------|-----------|-----------|-----------|-----------|------------|------------|------------|------------|-----------|-----------|------------|
| Methanosarcina      | 1              | 18             | 0          | 0          | 0          | 0         | 0         | 0         | 0         | 0         | 0          | 0          | 0          | 0          | 0         | 0         | 0          |
| Methanosphaera      | 1              | 7              | 0          | 0          | 0          | 0         | 0         | 0         | 0         | 0         | 0          | 0          | 0          | 0          | 0         | 0         | 0          |
| Methanosphaerula    | 1              | 8              | 0          | 0          | 0          | 0         | 0         | 0         | 0         | 0         | 0          | 0          | 0          | 0          | 0         | 0         | 0          |
| Methanospirillum    | 1              | 6              | 0          | 0          | 0          | 0         | 0         | 0         | 0         | 0         | 0          | 0          | 0          | 0          | 0         | 0         | 0          |
| Methanothermobacter | 1              | 6              | 0          | 0          | 0          | 0         | 0         | 0         | 0         | 0         | 0          | 0          | 0          | 0          | 0         | 0         | 0          |
| Methanothermococcus | 1              | 5              | 0          | 0          | 0          | 0         | 0         | 0         | 0         | 0         | 0          | 0          | 0          | 0          | 0         | 0         | 0          |
| Methanothermus      | 1              | 5              | 0          | 0          | 0          | 0         | 0         | 0         | 0         | 0         | 0          | 0          | 0          | 0          | 0         | 0         | 0          |
| Methanotorris       | 1              | 5              | 0          | 0          | 0          | 0         | 0         | 0         | 0         | 0         | 0          | 0          | 0          | 0          | 0         | 0         | 0          |
| Methylacidiphilum   | 2              | 48             | 0          | 0          | 0          | 0         | 0         | 0         | 0         | 0         | 0          | 0          | 0          | 0          | 0         | 0         | 1          |
| Methylarcula        | 1              | 2              | 0          | 0          | 0          | 0         | 0         | 0         | 0         | 0         | 0          | 0          | 0          | 0          | 0         | 0         | 0          |
| Methylibium         | 1              | 38             | 0          | 0          | 0          | 0         | 0         | 0         | 0         | 0         | 0          | 0          | 0          | 0          | 0         | 0         | 0          |
| Methylobacillus     | 2              | 61             | 0          | 0          | 0          | 0         | 0         | 1         | 0         | 0         | 0          | 0          | 0          | 0          | 0         | 0         | 0          |
| Methylobacterium    | 3              | 236            | 1          | 0          | 0          | 0         | 0         | 1         | 1         | 1         | 0          | 1          | 0          | 0          | 0         | 0         | 1          |
| Methylocella        | 3              | 117            | 0          | 0          | 0          | 0         | 0         | 1         | 1         | 0         | 1          | 0          | 0          | 0          | 0         | 0         | 0          |
| Methylococcus       | 2              | 80             | 0          | 0          | 0          | 0         | 0         | 1         | 0         | 0         | 0          | 0          | 0          | 0          | 0         | 0         | 0          |
| Methylocystis       | 1              | 21             | 0          | 0          | 0          | 0         | 0         | 0         | 0         | 0         | 0          | 0          | 0          | 0          | 0         | 0         | 0          |
| Methyloferula       | 1              | 2              | 0          | 0          | 0          | 0         | 0         | 0         | 0         | 0         | 0          | 0          | 0          | 0          | 0         | 0         | 0          |
| Methylomicrobium    | 1              | 12             | 0          | 0          | 0          | 0         | 0         | 0         | 0         | 0         | 0          | 0          | 0          | 0          | 0         | 0         | 0          |
| Methylomonas        | 1              | 15             | 0          | 0          | 0          | 0         | 0         | 0         | 0         | 0         | 0          | 0          | 0          | 0          | 0         | 0         | 0          |
| Methylophaga        | 1              | 7              | 0          | 0          | 0          | 0         | 0         | 0         | 0         | 0         | 0          | 0          | 0          | 0          | 0         | 0         | 0          |
| Methylophilus       | 1              | 2              | 0          | 0          | 0          | 0         | 0         | 0         | 0         | 0         | 0          | 0          | 0          | 0          | 0         | 0         | 0          |
| Methylosinus        | 1              | 2              | 0          | 0          | 0          | 0         | 0         | 0         | 0         | 0         | 0          | 0          | 0          | 0          | 0         | 0         | 0          |
| Methylotenera       | 2              | 72             | 0          | 0          | 0          | 0         | 0         | 1         | 0         | 0         | 0          | 0          | 0          | 0          | 0         | 0         | 0          |
| Methyloversatilis   | 1              | 5              | 0          | 0          | 0          | 0         | 0         | 0         | 0         | 0         | 0          | 0          | 0          | 0          | 0         | 0         | 0          |
| Methylovorus        | 2              | 66             | 0          | 0          | 0          | 0         | 0         | 1         | 0         | 0         | 0          | 0          | 0          | 0          | 0         | 0         | 0          |
| Micavibrio          | 1              | 9              | 0          | 0          | 0          | 0         | 0         | 0         | 0         | 0         | 0          | 0          | 0          | 0          | 0         | 0         | 0          |
| Microbacterium      | 2              | 115            | 0          | 0          | 0          | 0         | 0         | 1         | 1         | 1         | 0          | 1          | 0          | 0          | 0         | 0         | 1          |
| Microchaete         | 1              | 23             | 0          | 0          | 0          | 0         | 0         | 0         | 0         | 0         | 0          | 0          | 0          | 0          | 0         | 0         | 0          |
| Micrococcus         | 2              | 72             | 0          | 0          | 0          | 0         | 0         | 0         | 0         | 0         | 0          | 0          | 0          | 0          | 0         | 0         | 0          |
| Microcoleus         | 1              | 17             | 0          | 0          | 0          | 0         | 0         | 0         | 0         | 0         | 0          | 0          | 0          | 0          | 0         | 0         | 0          |
| Microcystis         | 2              | 67             | 0          | 0          | 0          | 0         | 0         | 1         | 0         | 0         | 0          | 0          | 0          | 0          | 0         | 0         | 0          |
| Microlunatus        | 1              | 25             | 0          | 0          | 0          | 0         | 0         | 0         | 0         | 0         | 0          | 0          | 0          | 0          | 0         | 0         | 0          |
| Micromonospora      | 2              | 115            | 0          | 0          | 0          | 0         | 0         | 1         | 0         | 0         | 0          | 0          | 0          | 0          | 0         | 0         | 0          |
| Microvirga          | 1              | 6              | 0          | 0          | 0          | 0         | 0         | 0         | 0         | 0         | 0          | 0          | 0          | 0          | 0         | 0         | 0          |
| Mobiluncus          | 1              | 41             | 0          | 0          | 0          | 0         | 0         | 0         | 0         | 0         | 0          | 0          | 0          | 0          | 0         | 0         | 0          |
| Modestobacter       | 1              | 43             | 0          | 0          | 0          | 0         | 0         | 0         | 0         | 0         | 0          | 0          | 0          | 0          | 0         | 0         | 0          |
| Moorea              | 1              | 2              | 0          | 0          | 0          | 0         | 0         | 0         | 0         | 0         | 0          | 0          | 0          | 0          | 0         | 0         | 0          |
| Moorella            | 2              | 69             | 0          | 0          | 0          | 0         | 0         | 0         | 0         | 0         | 0          | 0          | 0          | 0          | 0         | 0         | 0          |
| Moraxella           | 2              | 66             | 0          | 0          | 0          | 0         | 0         | 1         | 0         | 0         | 0          | 0          | 0          | 0          | 0         | 0         | 0          |
| Morganella          | 1              | 29             | 0          | 0          | 0          | 0         | 0         | 0         | 0         | 0         | 0          | 0          | 0          | 0          | 0         | 0         | 0          |
| Moritella           | 1              | 2              | 0          | 0          | 0          | 0         | 0         | 0         | 0         | 0         | 0          | 0          | 0          | 0          | 0         | 0         | 0          |
| Muricauda           | 1              | 23             | 0          | 0          | 0          | 0         | 0         | 0         | 0         | 0         | 0          | 0          | 0          | 0          | 0         | 0         | 0          |
| Mycobacterium       | 3              | 306            | 1          | 0          | 1          | 0         | 0         | 1         | 1         | 0         | 0          | 1          | 0          | 0          | 0         | 0         | 1          |
| Mycoplasma          | 1              | 53             | 0          | 0          | 0          | 0         | 0         | 1         | 0         | 0         | 0          | 0          | 0          | 0          | 0         | 0         | 0          |
| Myxococcus          | 2              | 110            | 0          | 0          | 0          | 0         | 0         | 1         | 0         | 0         | 0          | 1          | 0          | 0          | 0         | 0         | 0          |
| Nakamurella         | 2              | 115            | 0          | 0          | 0          | 0         | 0         | 1         | 0         | 1         | 0          | 0          | 0          | 0          | 0         | 0         | 0          |
| napthalene          | 1              | 2              | 0          | 0          | 0          | 0         | 0         | 0         | 0         | 0         | 0          | 0          | 0          | 0          | 0         | 0         | 0          |
| Natranaerobius      | 2              | 55             | 0          | 0          | 0          | 0         | 0         | 0         | 0         | 0         | 0          | 0          | 0          | 0          | 0         | 0         | 0          |
| Natrialba           | 1              | 16             | 0          | 0          | 0          | 0         | 0         | 0         | 0         | 0         | 0          | 0          | 0          | 0          | 0         | 0         | 0          |
| Natrinema           | 1              | 16             | 0          | 0          | 0          | 0         | 0         | 0         | 0         | 0         | 0          | 0          | 0          | 0          | 0         | 0         | 0          |
| Natronobacterium    | 1              | 11             | 0          | 0          | 0          | 0         | 0         | 0         | 0         | 0         | 0          | 0          | 0          | 0          | 0         | 0         | 0          |
| Natronococcus       | 1              | 21             | 0          | 0          | 0          | 0         | 0         | 0         | 0         | 0         | 0          | 0          | 0          | 0          | 0         | 0         | 0          |

| Genus             | Cluster Number | Protein Counts | 1.14.12.10 | 1.14.12.13 | 1.14.12.18 | 1.14.12.3 | 1.14.12.7 | 1.14.13.- | 1.14.13.1 | 1.14.13.2 | 1.14.13.20 | 1.14.13.22 | 1.14.13.40 | 1.14.13.50 | 1.14.13.7 | 1.14.13.8 | 1.14.13.82 |
|-------------------|----------------|----------------|------------|------------|------------|-----------|-----------|-----------|-----------|-----------|------------|------------|------------|------------|-----------|-----------|------------|
| Natronomonas      | 1              | 20             | 0          | 0          | 0          | 0         | 0         | 0         | 0         | 0         | 0          | 0          | 0          | 0          | 0         | 0         | 0          |
| Nautilia          | 2              | 48             | 0          | 0          | 0          | 0         | 0         | 1         | 0         | 0         | 0          | 0          | 0          | 0          | 0         | 0         | 0          |
| Neisseria         | 2              | 67             | 1          | 0          | 0          | 0         | 0         | 1         | 0         | 0         | 0          | 0          | 0          | 0          | 0         | 0         | 0          |
| Neisseriaceae     | 1              | 1              | 0          | 0          | 0          | 0         | 0         | 0         | 0         | 0         | 0          | 0          | 0          | 0          | 0         | 0         | 0          |
| Neorickettsia     | 1              | 31             | 0          | 0          | 0          | 0         | 0         | 1         | 0         | 0         | 0          | 0          | 0          | 0          | 0         | 0         | 0          |
| Neptuniibacter    | 1              | 2              | 0          | 0          | 0          | 0         | 0         | 0         | 0         | 0         | 0          | 0          | 0          | 0          | 0         | 0         | 0          |
| Niastella         | 1              | 21             | 0          | 0          | 0          | 0         | 0         | 0         | 0         | 0         | 0          | 0          | 0          | 0          | 0         | 0         | 0          |
| Nitratifractor    | 2              | 54             | 0          | 0          | 0          | 0         | 0         | 0         | 0         | 0         | 0          | 0          | 0          | 0          | 0         | 0         | 0          |
| Nitratireductor   | 1              | 19             | 0          | 0          | 0          | 0         | 0         | 0         | 0         | 0         | 0          | 0          | 0          | 0          | 0         | 0         | 0          |
| Nitratiruptor     | 2              | 40             | 0          | 0          | 0          | 0         | 0         | 0         | 0         | 0         | 0          | 0          | 0          | 0          | 0         | 0         | 0          |
| Nitrobacter       | 2              | 99             | 0          | 0          | 0          | 0         | 0         | 1         | 1         | 0         | 0          | 0          | 0          | 0          | 0         | 0         | 0          |
| Nitrococcus       | 1              | 2              | 0          | 0          | 0          | 0         | 0         | 0         | 0         | 0         | 0          | 0          | 0          | 0          | 0         | 0         | 0          |
| Nitrosococcus     | 2              | 94             | 0          | 0          | 0          | 0         | 0         | 1         | 0         | 0         | 0          | 0          | 0          | 0          | 0         | 0         | 0          |
| Nitrosomonas      | 2              | 72             | 0          | 0          | 0          | 0         | 0         | 1         | 0         | 0         | 0          | 0          | 0          | 0          | 0         | 0         | 0          |
| Nitrosopumilaceae | 1              | 7              | 0          | 0          | 0          | 0         | 0         | 0         | 0         | 0         | 0          | 0          | 0          | 0          | 0         | 0         | 0          |
| Nitrosopumilus    | 1              | 11             | 0          | 0          | 0          | 0         | 0         | 0         | 0         | 0         | 0          | 0          | 0          | 0          | 0         | 0         | 0          |
| Nitrospira        | 2              | 74             | 0          | 0          | 0          | 0         | 0         | 1         | 0         | 0         | 0          | 1          | 0          | 0          | 0         | 0         | 0          |
| Nocardia          | 2              | 185            | 1          | 0          | 0          | 0         | 0         | 1         | 1         | 0         | 0          | 1          | 1          | 0          | 0         | 0         | 0          |
| Nocardioidaceae   | 1              | 2              | 1          | 0          | 0          | 0         | 0         | 0         | 0         | 0         | 0          | 0          | 0          | 0          | 0         | 0         | 0          |
| Nocardioides      | 2              | 157            | 1          | 0          | 0          | 0         | 0         | 1         | 0         | 0         | 1          | 1          | 0          | 0          | 0         | 0         | 0          |
| Nocardiopsis      | 2              | 102            | 0          | 0          | 0          | 0         | 0         | 1         | 0         | 0         | 0          | 1          | 0          | 0          | 0         | 0         | 0          |
| Nodularia         | 1              | 22             | 0          | 0          | 0          | 0         | 0         | 0         | 0         | 0         | 0          | 0          | 0          | 0          | 0         | 0         | 0          |
| Nonlabens         | 1              | 19             | 0          | 0          | 0          | 0         | 0         | 0         | 0         | 0         | 0          | 0          | 0          | 0          | 0         | 0         | 0          |
| Nostoc            | 2              | 111            | 0          | 0          | 0          | 0         | 0         | 1         | 0         | 0         | 0          | 1          | 0          | 0          | 0         | 0         | 0          |
| Nostocaceae       | 1              | 2              | 0          | 0          | 0          | 0         | 0         | 0         | 0         | 0         | 0          | 0          | 0          | 0          | 0         | 0         | 0          |
| Novosphingobium   | 2              | 169            | 1          | 1          | 1          | 0         | 0         | 1         | 0         | 1         | 0          | 1          | 0          | 0          | 0         | 0         | 0          |
| Oceanibaculum     | 1              | 3              | 0          | 0          | 0          | 0         | 0         | 0         | 0         | 0         | 0          | 0          | 0          | 0          | 0         | 0         | 0          |
| Oceanibulbus      | 1              | 12             | 0          | 0          | 0          | 0         | 0         | 0         | 0         | 0         | 0          | 0          | 0          | 0          | 0         | 0         | 1          |
| Oceanicola        | 1              | 9              | 0          | 0          | 0          | 0         | 0         | 0         | 0         | 0         | 0          | 0          | 0          | 0          | 0         | 0         | 0          |
| Oceanimonas       | 1              | 33             | 0          | 0          | 0          | 0         | 0         | 0         | 0         | 0         | 0          | 0          | 0          | 0          | 0         | 0         | 0          |
| Oceaniovalibus    | 1              | 2              | 0          | 0          | 0          | 0         | 0         | 0         | 0         | 0         | 0          | 0          | 0          | 0          | 0         | 0         | 0          |
| Oceanithermus     | 2              | 72             | 0          | 0          | 0          | 0         | 0         | 0         | 0         | 0         | 0          | 0          | 0          | 0          | 0         | 0         | 0          |
| Oceanobacillus    | 2              | 91             | 0          | 0          | 0          | 0         | 0         | 1         | 0         | 0         | 0          | 0          | 0          | 0          | 0         | 0         | 0          |
| Oceanospirillum   | 1              | 2              | 0          | 0          | 0          | 0         | 0         | 0         | 0         | 0         | 0          | 0          | 0          | 0          | 0         | 0         | 0          |
| Ochrobactrum      | 2              | 133            | 0          | 0          | 0          | 0         | 0         | 1         | 1         | 1         | 0          | 0          | 1          | 0          | 0         | 0         | 0          |
| Octadecabacter    | 1              | 29             | 0          | 0          | 0          | 0         | 0         | 0         | 0         | 0         | 0          | 0          | 0          | 0          | 0         | 0         | 0          |
| Oenococcus        | 2              | 41             | 0          | 0          | 0          | 0         | 0         | 0         | 0         | 0         | 0          | 0          | 0          | 0          | 0         | 0         | 0          |
| Oleomonas         | 1              | 2              | 0          | 0          | 0          | 0         | 0         | 0         | 0         | 0         | 0          | 0          | 0          | 0          | 1         | 0         | 0          |
| Oligotropha       | 3              | 87             | 0          | 0          | 0          | 0         | 0         | 1         | 1         | 0         | 0          | 0          | 0          | 0          | 0         | 0         | 0          |
| Olsenella         | 2              | 40             | 0          | 0          | 0          | 0         | 0         | 0         | 0         | 0         | 0          | 0          | 0          | 0          | 0         | 0         | 0          |
| Opitutus          | 2              | 67             | 0          | 0          | 0          | 0         | 0         | 0         | 0         | 0         | 0          | 0          | 0          | 0          | 0         | 0         | 0          |
| Orientia          | 1              | 21             | 0          | 0          | 0          | 0         | 0         | 1         | 0         | 0         | 0          | 0          | 0          | 0          | 0         | 0         | 0          |
| Ornithobacterium  | 1              | 11             | 0          | 0          | 0          | 0         | 0         | 0         | 0         | 0         | 0          | 0          | 0          | 0          | 0         | 0         | 0          |
| Oscillatoria      | 1              | 16             | 0          | 0          | 0          | 0         | 0         | 0         | 0         | 0         | 0          | 0          | 0          | 0          | 0         | 0         | 0          |
| Oscillatoriales   | 1              | 2              | 0          | 0          | 0          | 0         | 0         | 0         | 0         | 0         | 0          | 0          | 0          | 0          | 0         | 0         | 0          |
| Oscillibacter     | 1              | 20             | 0          | 0          | 0          | 0         | 0         | 0         | 0         | 0         | 0          | 0          | 0          | 0          | 0         | 0         | 0          |
| Owenweeksia       | 1              | 15             | 0          | 0          | 0          | 0         | 0         | 0         | 0         | 0         | 0          | 0          | 0          | 0          | 0         | 0         | 0          |
| Oxalobacteraceae  | 1              | 4              | 0          | 0          | 0          | 0         | 0         | 0         | 0         | 0         | 0          | 0          | 0          | 0          | 0         | 0         | 0          |
| Paenibacillus     | 2              | 152            | 0          | 0          | 0          | 0         | 0         | 1         | 0         | 0         | 0          | 0          | 0          | 0          | 0         | 0         | 1          |
| Paludibacter      | 2              | 67             | 0          | 0          | 0          | 0         | 0         | 0         | 0         | 0         | 0          | 0          | 0          | 0          | 0         | 0         | 0          |
| Pandoraea         | 1              | 18             | 0          | 0          | 0          | 0         | 0         | 1         | 0         | 0         | 0          | 0          | 0          | 0          | 0         | 0         | 0          |
| Pannonibacter     | 1              | 3              | 0          | 0          | 0          | 0         | 0         | 0         | 0         | 0         | 0          | 0          | 0          | 0          | 0         | 0         | 0          |

| Genus              | Cluster Number | Protein Counts | 1.14.12.10 | 1.14.12.13 | 1.14.12.18 | 1.14.12.3 | 1.14.12.7 | 1.14.13.- | 1.14.13.1 | 1.14.13.2 | 1.14.13.20 | 1.14.13.22 | 1.14.13.40 | 1.14.13.50 | 1.14.13.7 | 1.14.13.8 | 1.14.13.82 |
|--------------------|----------------|----------------|------------|------------|------------|-----------|-----------|-----------|-----------|-----------|------------|------------|------------|------------|-----------|-----------|------------|
| Pantholops         | 1              | 23             | 1          | 0          | 0          | 0         | 0         | 0         | 0         | 0         | 0          | 0          | 0          | 0          | 0         | 0         | 0          |
| Pantoea            | 2              | 181            | 0          | 0          | 0          | 0         | 0         | 1         | 1         | 0         | 0          | 0          | 0          | 0          | 0         | 0         | 1          |
| Parabacteroides    | 2              | 64             | 0          | 0          | 0          | 0         | 0         | 0         | 0         | 0         | 0          | 0          | 0          | 0          | 0         | 0         | 0          |
| Parachlamydia      | 1              | 11             | 0          | 0          | 0          | 0         | 0         | 0         | 0         | 0         | 0          | 0          | 0          | 0          | 0         | 0         | 0          |
| Paracoccus         | 2              | 169            | 1          | 0          | 0          | 0         | 0         | 1         | 1         | 1         | 0          | 0          | 1          | 0          | 0         | 0         | 0          |
| Parvibaculum       | 3              | 117            | 1          | 0          | 0          | 0         | 0         | 1         | 0         | 0         | 0          | 1          | 0          | 0          | 0         | 0         | 0          |
| Parvularcula       | 2              | 72             | 0          | 0          | 0          | 0         | 0         | 1         | 0         | 0         | 0          | 0          | 0          | 0          | 0         | 0         | 0          |
| Pasteurella        | 2              | 85             | 0          | 0          | 0          | 0         | 0         | 1         | 0         | 0         | 0          | 0          | 0          | 0          | 0         | 0         | 0          |
| Pasteurellaceae    | 1              | 2              | 0          | 0          | 0          | 0         | 0         | 0         | 0         | 0         | 0          | 0          | 0          | 0          | 0         | 0         | 0          |
| Pectobacterium     | 1              | 44             | 0          | 0          | 0          | 0         | 0         | 0         | 0         | 0         | 0          | 0          | 0          | 0          | 0         | 0         | 0          |
| Pediococcus        | 1              | 43             | 0          | 0          | 0          | 0         | 0         | 0         | 0         | 0         | 0          | 0          | 0          | 0          | 0         | 0         | 0          |
| Pedobacter         | 2              | 88             | 0          | 0          | 0          | 0         | 0         | 0         | 0         | 0         | 0          | 0          | 0          | 0          | 0         | 0         | 0          |
| Pelagibaca         | 1              | 10             | 0          | 0          | 0          | 0         | 0         | 0         | 0         | 0         | 0          | 0          | 0          | 0          | 0         | 0         | 0          |
| Pelagibacterium    | 1              | 39             | 0          | 0          | 0          | 0         | 0         | 0         | 0         | 0         | 0          | 0          | 0          | 0          | 0         | 0         | 0          |
| Pelobacter         | 2              | 85             | 0          | 0          | 0          | 0         | 0         | 0         | 0         | 0         | 0          | 0          | 0          | 0          | 0         | 0         | 0          |
| Pelodictyon        | 2              | 62             | 0          | 0          | 0          | 0         | 0         | 0         | 0         | 0         | 0          | 0          | 0          | 0          | 0         | 0         | 0          |
| Pelosinus          | 1              | 1              | 0          | 0          | 0          | 0         | 0         | 0         | 0         | 0         | 0          | 0          | 0          | 0          | 0         | 0         | 0          |
| Pelotomaculum      | 2              | 60             | 0          | 0          | 0          | 0         | 0         | 0         | 0         | 0         | 0          | 0          | 0          | 0          | 0         | 0         | 0          |
| Peptostreptococcus | 1              | 1              | 0          | 0          | 0          | 0         | 0         | 0         | 0         | 0         | 0          | 0          | 0          | 0          | 0         | 0         | 0          |
| Persephonella      | 2              | 55             | 0          | 0          | 0          | 0         | 0         | 1         | 0         | 0         | 0          | 0          | 0          | 0          | 0         | 0         | 0          |
| Petrotoga          | 2              | 72             | 0          | 0          | 0          | 0         | 0         | 0         | 0         | 0         | 0          | 0          | 0          | 0          | 0         | 0         | 0          |
| Phaeobacter        | 2              | 55             | 0          | 0          | 0          | 0         | 0         | 0         | 0         | 0         | 0          | 0          | 0          | 0          | 0         | 0         | 0          |
| Phenylobacterium   | 3              | 103            | 0          | 0          | 0          | 0         | 0         | 1         | 0         | 0         | 0          | 1          | 0          | 0          | 0         | 0         | 0          |
| Photobacterium     | 2              | 119            | 0          | 0          | 0          | 0         | 0         | 1         | 0         | 0         | 0          | 0          | 0          | 0          | 0         | 0         | 0          |
| Photorhabdus       | 2              | 149            | 1          | 0          | 0          | 0         | 0         | 1         | 1         | 0         | 0          | 1          | 0          | 0          | 0         | 0         | 0          |
| Phycisphaera       | 1              | 9              | 0          | 0          | 0          | 0         | 0         | 0         | 0         | 0         | 0          | 0          | 0          | 0          | 0         | 0         | 0          |
| Phyllobacterium    | 1              | 6              | 0          | 0          | 0          | 0         | 0         | 0         | 0         | 0         | 0          | 0          | 0          | 0          | 0         | 0         | 0          |
| Picrophilus        | 1              | 15             | 0          | 0          | 0          | 0         | 0         | 0         | 0         | 0         | 0          | 0          | 0          | 0          | 0         | 0         | 0          |
| Pirellula          | 2              | 85             | 0          | 0          | 0          | 0         | 0         | 0         | 0         | 0         | 0          | 0          | 0          | 0          | 0         | 0         | 0          |
| Planctomyces       | 2              | 93             | 0          | 0          | 0          | 0         | 0         | 0         | 0         | 0         | 0          | 1          | 0          | 0          | 0         | 0         | 0          |
| Plautia            | 1              | 17             | 0          | 0          | 0          | 0         | 0         | 0         | 0         | 0         | 0          | 0          | 0          | 0          | 0         | 0         | 0          |
| Plesiomonas        | 1              | 4              | 0          | 0          | 0          | 0         | 0         | 0         | 0         | 0         | 0          | 0          | 0          | 0          | 0         | 0         | 0          |
| Pleurocapsa        | 1              | 23             | 0          | 0          | 0          | 0         | 0         | 0         | 0         | 0         | 0          | 0          | 0          | 0          | 0         | 0         | 0          |
| Polaribacter       | 2              | 74             | 0          | 0          | 0          | 0         | 0         | 0         | 0         | 0         | 0          | 0          | 0          | 0          | 0         | 0         | 0          |
| Polaromonas        | 3              | 238            | 1          | 0          | 1          | 0         | 1         | 1         | 1         | 1         | 0          | 1          | 0          | 0          | 0         | 0         | 1          |
| Polymorphum        | 3              | 173            | 0          | 0          | 1          | 0         | 0         | 1         | 1         | 1         | 0          | 0          | 1          | 0          | 0         | 0         | 1          |
| Polynucleobacter   | 1              | 19             | 0          | 0          | 0          | 0         | 0         | 0         | 0         | 0         | 0          | 0          | 0          | 0          | 0         | 0         | 0          |
| Ponticaulis        | 1              | 1              | 0          | 0          | 0          | 0         | 0         | 0         | 0         | 0         | 0          | 0          | 0          | 0          | 0         | 0         | 0          |
| Porphyromonas      | 2              | 63             | 0          | 0          | 0          | 0         | 0         | 0         | 0         | 0         | 0          | 0          | 0          | 0          | 0         | 0         | 0          |
| Prevotella         | 1              | 65             | 1          | 0          | 0          | 0         | 0         | 0         | 0         | 0         | 0          | 0          | 0          | 0          | 0         | 0         | 0          |
| Prochlorococcus    | 2              | 68             | 0          | 0          | 0          | 0         | 0         | 1         | 0         | 0         | 0          | 0          | 0          | 0          | 0         | 0         | 0          |
| Propionibacterium  | 1              | 62             | 0          | 0          | 0          | 0         | 0         | 0         | 0         | 0         | 0          | 0          | 0          | 0          | 0         | 0         | 0          |
| Prosthecochloris   | 1              | 16             | 0          | 0          | 0          | 0         | 0         | 0         | 0         | 0         | 0          | 0          | 0          | 0          | 0         | 0         | 0          |
| Proteobacteria     | 1              | 19             | 0          | 0          | 1          | 0         | 0         | 0         | 0         | 0         | 0          | 0          | 0          | 0          | 0         | 0         | 0          |
| Proteus            | 2              | 113            | 0          | 0          | 0          | 0         | 0         | 1         | 0         | 0         | 0          | 0          | 0          | 0          | 0         | 0         | 0          |
| Providencia        | 1              | 38             | 0          | 0          | 0          | 0         | 0         | 0         | 0         | 0         | 0          | 0          | 0          | 0          | 0         | 0         | 0          |
| Pseudaminobacter   | 1              | 10             | 0          | 0          | 0          | 0         | 0         | 0         | 0         | 0         | 0          | 0          | 0          | 0          | 0         | 0         | 0          |
| Pseudanabaena      | 1              | 11             | 0          | 0          | 0          | 0         | 0         | 0         | 0         | 0         | 0          | 0          | 0          | 0          | 0         | 0         | 0          |
| Pseudoalteromonas  | 2              | 188            | 0          | 0          | 0          | 0         | 0         | 1         | 1         | 1         | 0          | 0          | 0          | 0          | 0         | 0         | 1          |
| Pseudochrobactrum  | 1              | 7              | 0          | 0          | 0          | 0         | 0         | 0         | 0         | 0         | 0          | 0          | 0          | 0          | 0         | 0         | 0          |
| Pseudogulbenkiania | 1              | 40             | 0          | 0          | 0          | 0         | 0         | 0         | 0         | 0         | 0          | 0          | 0          | 0          | 0         | 0         | 0          |
| pseudomallei       | 3              | 131            | 1          | 0          | 0          | 0         | 0         | 1         | 0         | 0         | 0          | 1          | 0          | 0          | 0         | 0         | 1          |

| Genus                   | Cluster Number | Protein Counts | 1.14.12.10 | 1.14.12.13 | 1.14.12.18 | 1.14.12.3 | 1.14.12.7 | 1.14.13.- | 1.14.13.1 | 1.14.13.2 | 1.14.13.20 | 1.14.13.22 | 1.14.13.40 | 1.14.13.50 | 1.14.13.7 | 1.14.13.8 | 1.14.13.82 |
|-------------------------|----------------|----------------|------------|------------|------------|-----------|-----------|-----------|-----------|-----------|------------|------------|------------|------------|-----------|-----------|------------|
| Pseudomonas             | 3              | 381            | 1          | 1          | 1          | 0         | 0         | 1         | 1         | 1         | 1          | 1          | 0          | 0          | 1         | 0         | 1          |
| Pseudonocardia          | 3              | 180            | 1          | 0          | 0          | 0         | 1         | 1         | 1         | 1         | 0          | 1          | 1          | 0          | 1         | 0         | 1          |
| Pseudorhodobacter       | 1              | 4              | 0          | 0          | 0          | 0         | 0         | 0         | 0         | 0         | 0          | 0          | 0          | 0          | 0         | 0         | 0          |
| Pseudovibrio            | 1              | 33             | 0          | 0          | 0          | 0         | 0         | 0         | 0         | 0         | 0          | 0          | 0          | 0          | 0         | 0         | 0          |
| Pseudoxanthomonas       | 2              | 124            | 0          | 0          | 1          | 0         | 0         | 1         | 0         | 0         | 0          | 0          | 0          | 0          | 0         | 0         | 0          |
| Psychrobacter           | 2              | 124            | 1          | 0          | 0          | 0         | 0         | 1         | 0         | 0         | 0          | 0          | 0          | 0          | 0         | 0         | 0          |
| Psychroflexus           | 1              | 22             | 0          | 0          | 0          | 0         | 0         | 0         | 0         | 0         | 0          | 0          | 0          | 0          | 0         | 0         | 0          |
| Psychromonas            | 2              | 110            | 0          | 0          | 0          | 0         | 0         | 1         | 0         | 0         | 0          | 0          | 0          | 0          | 0         | 0         | 0          |
| Pusillimonas            | 3              | 111            | 0          | 0          | 0          | 0         | 0         | 1         | 0         | 0         | 0          | 0          | 0          | 0          | 0         | 0         | 1          |
| Pyrobaculum             | 1              | 15             | 0          | 0          | 0          | 0         | 0         | 0         | 0         | 0         | 0          | 0          | 0          | 0          | 0         | 0         | 0          |
| Pyrococcus              | 1              | 10             | 0          | 0          | 0          | 0         | 0         | 0         | 0         | 0         | 0          | 0          | 0          | 0          | 0         | 0         | 0          |
| Pyrolobus               | 1              | 4              | 0          | 0          | 0          | 0         | 0         | 0         | 0         | 0         | 0          | 0          | 0          | 0          | 0         | 0         | 0          |
| Rahnella                | 2              | 143            | 0          | 0          | 0          | 0         | 0         | 1         | 1         | 0         | 0          | 0          | 0          | 0          | 0         | 0         | 0          |
| Ralstonia               | 3              | 332            | 1          | 0          | 1          | 0         | 1         | 1         | 1         | 1         | 1          | 1          | 1          | 0          | 1         | 0         | 1          |
| Ramlibacter             | 1              | 35             | 0          | 0          | 0          | 0         | 0         | 0         | 0         | 0         | 0          | 0          | 0          | 0          | 0         | 0         | 0          |
| Raoultella              | 2              | 139            | 1          | 0          | 0          | 0         | 0         | 1         | 0         | 0         | 0          | 0          | 0          | 0          | 0         | 0         | 1          |
| Raphidiopsis            | 1              | 5              | 0          | 0          | 0          | 0         | 0         | 0         | 0         | 0         | 0          | 0          | 0          | 0          | 0         | 0         | 0          |
| Reinekea                | 1              | 2              | 0          | 0          | 0          | 0         | 0         | 0         | 0         | 0         | 0          | 0          | 0          | 0          | 0         | 0         | 0          |
| Renibacterium           | 2              | 67             | 0          | 0          | 0          | 0         | 0         | 1         | 1         | 0         | 0          | 1          | 0          | 0          | 0         | 0         | 0          |
| Rhizobiaceae            | 1              | 3              | 0          | 0          | 0          | 0         | 0         | 0         | 0         | 0         | 0          | 0          | 0          | 0          | 0         | 0         | 0          |
| Rhizobiales             | 1              | 6              | 0          | 0          | 0          | 0         | 0         | 0         | 0         | 0         | 0          | 0          | 0          | 0          | 0         | 0         | 0          |
| Rhizobium               | 3              | 257            | 1          | 0          | 0          | 0         | 0         | 1         | 1         | 1         | 1          | 0          | 0          | 0          | 0         | 0         | 1          |
| Rhizobium/Agrobacterium | 2              | 87             | 0          | 0          | 0          | 0         | 0         | 1         | 0         | 0         | 0          | 0          | 0          | 0          | 0         | 0         | 0          |
| Rhodanobacter           | 1              | 21             | 0          | 0          | 0          | 0         | 0         | 0         | 0         | 0         | 0          | 0          | 0          | 0          | 0         | 0         | 0          |
| Rhodobacter             | 3              | 175            | 1          | 0          | 0          | 0         | 0         | 1         | 1         | 0         | 0          | 0          | 0          | 0          | 0         | 0         | 0          |
| Rhodobacteraceae        | 1              | 21             | 0          | 0          | 0          | 0         | 0         | 0         | 0         | 0         | 0          | 0          | 0          | 0          | 0         | 0         | 0          |
| Rhodobacterales         | 1              | 34             | 0          | 0          | 0          | 0         | 0         | 0         | 0         | 0         | 0          | 0          | 0          | 0          | 0         | 0         | 0          |
| Rhodococcus             | 2              | 292            | 1          | 0          | 1          | 0         | 0         | 1         | 1         | 1         | 0          | 1          | 0          | 0          | 1         | 0         | 1          |
| Rhodocyclaceae          | 1              | 7              | 0          | 0          | 0          | 0         | 0         | 0         | 0         | 0         | 0          | 0          | 0          | 0          | 0         | 0         | 0          |
| Rhodoferax              | 3              | 144            | 0          | 0          | 0          | 0         | 0         | 1         | 0         | 1         | 0          | 0          | 0          | 0          | 0         | 0         | 0          |
| Rhodomicrobium          | 2              | 103            | 0          | 0          | 0          | 0         | 0         | 1         | 1         | 0         | 0          | 0          | 0          | 0          | 0         | 0         | 0          |
| Rhodopirellula          | 2              | 87             | 0          | 0          | 0          | 0         | 0         | 0         | 0         | 0         | 0          | 0          | 0          | 0          | 0         | 0         | 0          |
| Rhodopseudomonas        | 3              | 246            | 1          | 0          | 1          | 0         | 0         | 1         | 1         | 1         | 0          | 1          | 0          | 0          | 0         | 0         | 1          |
| Rhodospirillum          | 2              | 121            | 0          | 0          | 0          | 0         | 0         | 1         | 0         | 0         | 0          | 1          | 0          | 0          | 0         | 0         | 0          |
| Rhodothermus            | 2              | 76             | 0          | 0          | 0          | 0         | 0         | 0         | 0         | 0         | 0          | 0          | 0          | 0          | 0         | 0         | 0          |
| Rhodovulum              | 1              | 4              | 0          | 0          | 0          | 0         | 0         | 0         | 0         | 0         | 0          | 0          | 0          | 0          | 0         | 0         | 0          |
| Richelia                | 1              | 2              | 0          | 0          | 0          | 0         | 0         | 0         | 0         | 0         | 0          | 0          | 0          | 0          | 0         | 0         | 0          |
| Rickettsia              | 2              | 43             | 0          | 0          | 0          | 0         | 0         | 1         | 0         | 0         | 0          | 0          | 0          | 0          | 0         | 0         | 0          |
| Rickettsiaceae          | 1              | 5              | 0          | 0          | 0          | 0         | 0         | 0         | 0         | 0         | 0          | 0          | 0          | 0          | 0         | 0         | 0          |
| Riemerella              | 2              | 61             | 0          | 0          | 0          | 0         | 0         | 0         | 1         | 0         | 0          | 0          | 0          | 0          | 0         | 0         | 0          |
| Rivularia               | 1              | 18             | 0          | 0          | 0          | 0         | 0         | 0         | 0         | 0         | 0          | 0          | 0          | 0          | 0         | 0         | 0          |
| Robiginitalea           | 2              | 83             | 0          | 0          | 0          | 0         | 0         | 1         | 0         | 0         | 0          | 0          | 0          | 0          | 0         | 0         | 0          |
| Roseburia               | 2              | 58             | 0          | 0          | 0          | 0         | 0         | 0         | 0         | 0         | 0          | 0          | 0          | 0          | 0         | 0         | 0          |
| Roseibium               | 1              | 3              | 0          | 0          | 0          | 0         | 0         | 0         | 0         | 0         | 0          | 0          | 0          | 0          | 0         | 0         | 0          |
| Roseiflexus             | 3              | 100            | 0          | 0          | 0          | 0         | 0         | 1         | 0         | 0         | 0          | 0          | 0          | 0          | 0         | 0         | 0          |
| Roseobacter             | 2              | 149            | 1          | 0          | 0          | 0         | 0         | 1         | 1         | 1         | 0          | 0          | 0          | 0          | 0         | 0         | 1          |
| Roseomonas              | 1              | 2              | 0          | 0          | 0          | 0         | 0         | 0         | 0         | 0         | 0          | 0          | 0          | 0          | 0         | 0         | 0          |
| Roseovarius             | 1              | 15             | 0          | 0          | 0          | 0         | 0         | 0         | 0         | 0         | 0          | 0          | 0          | 0          | 0         | 0         | 0          |
| Rothia                  | 1              | 44             | 0          | 0          | 0          | 0         | 0         | 0         | 0         | 0         | 0          | 0          | 0          | 0          | 0         | 0         | 0          |
| Rubrivivax              | 1              | 24             | 0          | 0          | 0          | 0         | 0         | 0         | 0         | 0         | 0          | 0          | 0          | 0          | 0         | 0         | 0          |
| Rubroacter              | 3              | 117            | 0          | 0          | 0          | 0         | 0         | 1         | 1         | 1         | 0          | 0          | 1          | 0          | 0         | 0         | 0          |
| Ruegeria                | 2              | 189            | 1          | 0          | 0          | 0         | 0         | 1         | 1         | 1         | 0          | 0          | 1          | 0          | 0         | 0         | 0          |

| Genus             | Cluster Number | Protein Counts | 1.14.12.10 | 1.14.12.13 | 1.14.12.18 | 1.14.12.3 | 1.14.12.7 | 1.14.13.- | 1.14.13.1 | 1.14.13.2 | 1.14.13.20 | 1.14.13.22 | 1.14.13.40 | 1.14.13.50 | 1.14.13.7 | 1.14.13.8 | 1.14.13.82 |
|-------------------|----------------|----------------|------------|------------|------------|-----------|-----------|-----------|-----------|-----------|------------|------------|------------|------------|-----------|-----------|------------|
| Ruminococcaceae   | 1              | 2              | 0          | 0          | 0          | 0         | 0         | 0         | 0         | 0         | 0          | 0          | 0          | 0          | 0         | 0         | 0          |
| Ruminococcus      | 2              | 101            | 0          | 0          | 0          | 0         | 0         | 0         | 0         | 0         | 0          | 0          | 0          | 0          | 0         | 0         | 0          |
| Runella           | 1              | 26             | 0          | 0          | 0          | 0         | 0         | 0         | 0         | 0         | 0          | 0          | 0          | 0          | 0         | 0         | 0          |
| Saccharomonospora | 2              | 132            | 1          | 0          | 0          | 0         | 0         | 1         | 0         | 1         | 0          | 1          | 0          | 0          | 0         | 0         | 1          |
| Saccharophagus    | 2              | 81             | 0          | 0          | 0          | 0         | 0         | 1         | 0         | 0         | 0          | 0          | 0          | 0          | 0         | 0         | 0          |
| Saccharopolyspora | 3              | 194            | 1          | 0          | 0          | 0         | 0         | 1         | 1         | 1         | 0          | 1          | 1          | 0          | 0         | 0         | 1          |
| Saccharothrix     | 1              | 32             | 0          | 0          | 0          | 0         | 0         | 0         | 0         | 0         | 0          | 0          | 0          | 0          | 0         | 0         | 0          |
| Sagittula         | 1              | 10             | 0          | 0          | 0          | 0         | 0         | 0         | 0         | 0         | 0          | 0          | 0          | 0          | 0         | 0         | 0          |
| Salinibacter      | 2              | 77             | 0          | 0          | 0          | 0         | 0         | 0         | 0         | 0         | 0          | 1          | 0          | 0          | 0         | 0         | 0          |
| Salinimonas       | 1              | 1              | 0          | 0          | 0          | 0         | 0         | 0         | 0         | 0         | 0          | 0          | 0          | 0          | 0         | 0         | 0          |
| Salinispora       | 3              | 127            | 0          | 0          | 0          | 0         | 0         | 1         | 1         | 0         | 0          | 0          | 0          | 0          | 0         | 0         | 0          |
| Salinivibrio      | 1              | 2              | 0          | 0          | 0          | 0         | 0         | 0         | 0         | 0         | 0          | 0          | 0          | 0          | 0         | 0         | 0          |
| Salmonella        | 2              | 151            | 0          | 0          | 0          | 0         | 0         | 1         | 0         | 0         | 0          | 0          | 0          | 0          | 0         | 0         | 0          |
| Sanguibacter      | 2              | 73             | 0          | 0          | 0          | 0         | 0         | 1         | 0         | 0         | 0          | 1          | 0          | 0          | 0         | 0         | 0          |
| Saprospira        | 1              | 13             | 0          | 0          | 0          | 0         | 0         | 0         | 0         | 0         | 0          | 0          | 0          | 0          | 0         | 0         | 0          |
| Scardovia         | 1              | 1              | 0          | 0          | 0          | 0         | 0         | 0         | 0         | 0         | 0          | 0          | 0          | 0          | 0         | 0         | 0          |
| Scytonema         | 1              | 10             | 0          | 0          | 0          | 0         | 0         | 1         | 0         | 0         | 0          | 0          | 0          | 0          | 0         | 0         | 0          |
| Sebaldella        | 2              | 69             | 0          | 0          | 0          | 0         | 0         | 0         | 0         | 0         | 0          | 0          | 0          | 0          | 0         | 0         | 0          |
| Segniliparus      | 2              | 85             | 0          | 0          | 0          | 0         | 0         | 1         | 1         | 0         | 0          | 1          | 0          | 0          | 0         | 0         | 0          |
| Selenomonas       | 2              | 57             | 0          | 0          | 0          | 0         | 0         | 0         | 0         | 0         | 0          | 0          | 0          | 0          | 0         | 0         | 0          |
| Serinicoccus      | 1              | 1              | 0          | 0          | 0          | 0         | 0         | 0         | 0         | 0         | 0          | 0          | 0          | 0          | 0         | 0         | 0          |
| Serratia          | 2              | 186            | 0          | 0          | 0          | 0         | 0         | 1         | 1         | 1         | 0          | 0          | 0          | 0          | 0         | 0         | 1          |
| Shewanella        | 3              | 214            | 0          | 0          | 0          | 0         | 0         | 1         | 0         | 0         | 0          | 1          | 0          | 0          | 0         | 0         | 0          |
| Shigella          | 2              | 172            | 1          | 0          | 0          | 0         | 0         | 1         | 0         | 0         | 0          | 0          | 0          | 0          | 0         | 0         | 0          |
| Shinella          | 1              | 2              | 0          | 0          | 0          | 0         | 0         | 0         | 0         | 0         | 0          | 0          | 0          | 0          | 0         | 0         | 0          |
| Sideroxydans      | 2              | 81             | 0          | 0          | 0          | 0         | 0         | 1         | 0         | 0         | 0          | 0          | 0          | 0          | 0         | 0         | 0          |
| Silicibacter      | 2              | 105            | 0          | 0          | 0          | 0         | 0         | 1         | 0         | 1         | 0          | 0          | 1          | 0          | 0         | 0         | 0          |
| Simiduia          | 1              | 18             | 0          | 0          | 0          | 0         | 0         | 0         | 0         | 0         | 0          | 0          | 0          | 0          | 0         | 0         | 0          |
| Simkania          | 1              | 6              | 0          | 0          | 0          | 0         | 0         | 0         | 0         | 0         | 0          | 0          | 0          | 0          | 0         | 0         | 0          |
| Simonsiella       | 1              | 2              | 0          | 0          | 0          | 0         | 0         | 0         | 0         | 0         | 0          | 0          | 0          | 0          | 0         | 0         | 0          |
| Singulisphaera    | 1              | 18             | 0          | 0          | 0          | 0         | 0         | 0         | 0         | 0         | 0          | 0          | 0          | 0          | 0         | 0         | 0          |
| Sinorhizobium     | 3              | 207            | 1          | 0          | 0          | 0         | 0         | 1         | 1         | 1         | 0          | 1          | 0          | 0          | 0         | 0         | 0          |
| Slackia           | 2              | 46             | 0          | 0          | 0          | 0         | 0         | 0         | 0         | 0         | 0          | 0          | 0          | 0          | 0         | 0         | 0          |
| Smaragdicoccus    | 1              | 3              | 0          | 0          | 0          | 0         | 0         | 0         | 0         | 0         | 0          | 0          | 0          | 0          | 0         | 0         | 0          |
| Sodalis           | 2              | 71             | 0          | 0          | 0          | 0         | 0         | 1         | 0         | 0         | 0          | 0          | 0          | 0          | 0         | 0         | 0          |
| Solibacillus      | 1              | 23             | 0          | 0          | 0          | 0         | 0         | 0         | 0         | 0         | 0          | 0          | 0          | 0          | 0         | 0         | 0          |
| Solitaea          | 1              | 13             | 0          | 0          | 0          | 0         | 0         | 0         | 0         | 0         | 0          | 0          | 0          | 0          | 0         | 0         | 0          |
| Sorangium         | 3              | 115            | 0          | 0          | 0          | 0         | 0         | 1         | 0         | 0         | 0          | 1          | 0          | 0          | 0         | 0         | 0          |
| Sphaerobacter     | 2              | 100            | 0          | 0          | 0          | 0         | 0         | 0         | 0         | 1         | 0          | 0          | 0          | 0          | 0         | 0         | 0          |
| Sphaerochaeta     | 1              | 42             | 0          | 0          | 0          | 0         | 0         | 0         | 0         | 0         | 0          | 0          | 0          | 0          | 0         | 0         | 0          |
| Sphingobacterium  | 3              | 85             | 0          | 0          | 0          | 0         | 0         | 1         | 1         | 0         | 0          | 0          | 0          | 0          | 0         | 0         | 0          |
| Sphingobium       | 1              | 179            | 0          | 0          | 0          | 0         | 1         | 1         | 0         | 0         | 1          | 1          | 0          | 0          | 1         | 0         | 0          |
| Sphingomonadaceae | 1              | 15             | 0          | 0          | 0          | 0         | 0         | 0         | 0         | 0         | 0          | 0          | 0          | 0          | 0         | 0         | 0          |
| Sphingomonas      | 2              | 220            | 1          | 1          | 1          | 1         | 1         | 1         | 1         | 0         | 1          | 1          | 1          | 0          | 0         | 0         | 1          |
| Sphingopyxis      | 3              | 99             | 0          | 0          | 0          | 0         | 0         | 1         | 0         | 0         | 0          | 0          | 0          | 0          | 0         | 0         | 0          |
| Spirochaeta       | 2              | 103            | 0          | 0          | 0          | 0         | 0         | 1         | 0         | 0         | 0          | 0          | 0          | 0          | 0         | 0         | 0          |
| Spiroplasma       | 1              | 6              | 0          | 0          | 0          | 0         | 0         | 0         | 0         | 0         | 0          | 0          | 0          | 0          | 0         | 0         | 0          |
| Spirosoma         | 2              | 107            | 0          | 0          | 0          | 0         | 0         | 1         | 1         | 1         | 0          | 0          | 0          | 0          | 0         | 0         | 0          |
| Stackebrandtia    | 2              | 110            | 0          | 0          | 0          | 0         | 0         | 1         | 1         | 0         | 0          | 0          | 0          | 0          | 0         | 0         | 0          |
| Stanieria         | 1              | 17             | 0          | 0          | 0          | 0         | 0         | 0         | 0         | 0         | 0          | 0          | 0          | 0          | 0         | 0         | 0          |
| Staphylococcus    | 2              | 108            | 0          | 0          | 0          | 0         | 0         | 1         | 1         | 0         | 0          | 0          | 0          | 0          | 0         | 0         | 0          |
| Staphylothermus   | 1              | 12             | 0          | 0          | 0          | 0         | 0         | 0         | 0         | 0         | 0          | 0          | 0          | 0          | 0         | 0         | 0          |

| Genus                  | Cluster Number | Protein Counts | 1.14.12.10 | 1.14.12.13 | 1.14.12.18 | 1.14.12.3 | 1.14.12.7 | 1.14.13.- | 1.14.13.1 | 1.14.13.2 | 1.14.13.20 | 1.14.13.22 | 1.14.13.40 | 1.14.13.50 | 1.14.13.7 | 1.14.13.8 | 1.14.13.82 |
|------------------------|----------------|----------------|------------|------------|------------|-----------|-----------|-----------|-----------|-----------|------------|------------|------------|------------|-----------|-----------|------------|
| Stappia                | 1              | 2              | 0          | 0          | 0          | 0         | 0         | 0         | 0         | 0         | 0          | 0          | 0          | 0          | 0         | 0         | 0          |
| Starkeya               | 3              | 134            | 1          | 0          | 0          | 0         | 0         | 1         | 1         | 0         | 0          | 0          | 0          | 0          | 0         | 0         | 0          |
| Stenotrophomonas       | 3              | 104            | 0          | 0          | 0          | 0         | 0         | 1         | 0         | 0         | 0          | 0          | 0          | 0          | 0         | 0         | 0          |
| Stigmatella            | 3              | 129            | 0          | 0          | 0          | 0         | 0         | 1         | 0         | 1         | 0          | 0          | 0          | 0          | 0         | 0         | 1          |
| Streptobacillus        | 1              | 38             | 0          | 0          | 0          | 0         | 0         | 0         | 0         | 0         | 0          | 0          | 0          | 0          | 0         | 0         | 0          |
| Streptococcus          | 2              | 121            | 0          | 0          | 0          | 0         | 0         | 1         | 0         | 0         | 0          | 0          | 0          | 0          | 0         | 0         | 0          |
| Streptomyces           | 2              | 253            | 1          | 0          | 1          | 0         | 0         | 1         | 1         | 1         | 0          | 1          | 1          | 0          | 0         | 0         | 1          |
| Streptosporangium      | 3              | 148            | 0          | 0          | 0          | 0         | 0         | 1         | 1         | 1         | 0          | 1          | 0          | 0          | 0         | 0         | 0          |
| Strigomonas            | 1              | 2              | 0          | 0          | 0          | 0         | 0         | 0         | 0         | 0         | 0          | 0          | 0          | 0          | 0         | 0         | 0          |
| Sulfitobacter          | 1              | 10             | 0          | 0          | 0          | 0         | 0         | 0         | 0         | 0         | 0          | 0          | 0          | 0          | 0         | 0         | 0          |
| Sulfobacillus          | 1              | 30             | 0          | 0          | 0          | 0         | 0         | 0         | 0         | 0         | 0          | 0          | 0          | 0          | 0         | 0         | 0          |
| Sulfolobus             | 1              | 23             | 0          | 0          | 0          | 0         | 0         | 0         | 0         | 0         | 0          | 0          | 0          | 0          | 0         | 0         | 0          |
| Sulfuricurvum          | 2              | 67             | 0          | 0          | 0          | 0         | 0         | 1         | 0         | 0         | 0          | 0          | 0          | 0          | 0         | 0         | 0          |
| Sulfurihydrogenibium   | 2              | 55             | 0          | 0          | 0          | 0         | 0         | 0         | 0         | 0         | 0          | 0          | 0          | 0          | 0         | 0         | 0          |
| Sulfurimonas           | 2              | 60             | 0          | 0          | 0          | 0         | 0         | 0         | 0         | 0         | 0          | 0          | 0          | 0          | 0         | 0         | 0          |
| Sulfurospirillum       | 1              | 48             | 0          | 0          | 0          | 0         | 0         | 0         | 0         | 0         | 0          | 0          | 0          | 0          | 0         | 0         | 0          |
| Sulfurovum             | 2              | 48             | 0          | 0          | 0          | 0         | 0         | 1         | 0         | 0         | 0          | 0          | 0          | 0          | 0         | 0         | 0          |
| Symbiobacterium        | 2              | 68             | 0          | 0          | 0          | 0         | 0         | 0         | 0         | 0         | 0          | 0          | 0          | 0          | 0         | 0         | 0          |
| Synechococcus          | 1              | 34             | 0          | 0          | 0          | 0         | 0         | 0         | 0         | 0         | 0          | 0          | 0          | 0          | 0         | 0         | 0          |
| Synechocystis          | 1              | 40             | 0          | 0          | 0          | 0         | 0         | 0         | 0         | 0         | 0          | 0          | 0          | 0          | 0         | 0         | 0          |
| Synergistetes          | 1              | 27             | 0          | 0          | 0          | 0         | 0         | 0         | 0         | 0         | 0          | 0          | 0          | 0          | 0         | 0         | 0          |
| Syntrophobacter        | 2              | 101            | 0          | 0          | 0          | 0         | 0         | 0         | 0         | 0         | 0          | 0          | 0          | 0          | 0         | 0         | 0          |
| Syntrophobotulus       | 2              | 71             | 0          | 0          | 0          | 0         | 0         | 0         | 0         | 0         | 0          | 0          | 0          | 0          | 0         | 0         | 0          |
| Syntrophomonas         | 2              | 58             | 0          | 0          | 0          | 0         | 0         | 0         | 0         | 0         | 0          | 0          | 0          | 0          | 0         | 0         | 0          |
| Syntrophothermus       | 2              | 60             | 0          | 0          | 0          | 0         | 0         | 0         | 0         | 0         | 0          | 0          | 0          | 0          | 0         | 0         | 0          |
| Syntrophus             | 2              | 66             | 0          | 0          | 0          | 0         | 0         | 0         | 0         | 0         | 0          | 0          | 0          | 0          | 0         | 0         | 0          |
| Tannerella             | 1              | 8              | 0          | 0          | 0          | 0         | 0         | 0         | 0         | 0         | 0          | 0          | 0          | 0          | 0         | 0         | 0          |
| Taylorella             | 1              | 43             | 0          | 0          | 0          | 0         | 0         | 1         | 0         | 0         | 0          | 0          | 0          | 0          | 0         | 0         | 0          |
| Tepidanaerobacter      | 2              | 55             | 0          | 0          | 0          | 0         | 0         | 0         | 0         | 0         | 0          | 0          | 0          | 0          | 0         | 0         | 0          |
| Teredinibacter         | 2              | 109            | 0          | 0          | 0          | 0         | 0         | 1         | 0         | 0         | 0          | 0          | 0          | 0          | 0         | 0         | 1          |
| Terrabacter            | 1              | 1              | 0          | 0          | 1          | 0         | 0         | 0         | 0         | 0         | 0          | 0          | 0          | 0          | 0         | 0         | 0          |
| Terriglobus            | 2              | 83             | 0          | 0          | 0          | 0         | 0         | 0         | 0         | 1         | 0          | 0          | 0          | 0          | 0         | 0         | 0          |
| Tetragenococcus        | 1              | 12             | 0          | 0          | 0          | 0         | 0         | 0         | 0         | 0         | 0          | 0          | 0          | 0          | 0         | 0         | 0          |
| Thalassiobium          | 1              | 11             | 0          | 0          | 0          | 0         | 0         | 0         | 0         | 0         | 0          | 0          | 0          | 0          | 0         | 0         | 1          |
| Thalassobacter         | 1              | 9              | 0          | 0          | 0          | 0         | 0         | 0         | 0         | 0         | 0          | 0          | 0          | 0          | 0         | 0         | 1          |
| Thalassolituus         | 1              | 12             | 0          | 0          | 0          | 0         | 0         | 0         | 0         | 0         | 0          | 0          | 0          | 0          | 0         | 0         | 0          |
| Thalassospira          | 1              | 2              | 0          | 0          | 0          | 0         | 0         | 0         | 0         | 0         | 0          | 0          | 0          | 0          | 0         | 0         | 0          |
| Thauera                | 1              | 111            | 1          | 0          | 0          | 0         | 0         | 1         | 0         | 0         | 0          | 0          | 0          | 0          | 1         | 0         | 0          |
| Thermacetogenium       | 1              | 7              | 0          | 0          | 0          | 0         | 0         | 0         | 0         | 0         | 0          | 0          | 0          | 0          | 0         | 0         | 0          |
| Thermaerobacter        | 2              | 79             | 0          | 0          | 0          | 0         | 0         | 1         | 0         | 0         | 0          | 0          | 0          | 0          | 0         | 0         | 0          |
| Thermanaerovibrio      | 2              | 58             | 0          | 0          | 0          | 0         | 0         | 0         | 0         | 0         | 0          | 0          | 0          | 0          | 0         | 0         | 0          |
| Thermincola            | 2              | 62             | 0          | 0          | 0          | 0         | 0         | 0         | 0         | 0         | 0          | 0          | 0          | 0          | 0         | 0         | 0          |
| Thermoanaerobacter     | 2              | 76             | 0          | 0          | 0          | 0         | 0         | 0         | 0         | 0         | 0          | 0          | 0          | 0          | 0         | 0         | 0          |
| Thermoanaerobacterium  | 2              | 64             | 0          | 0          | 0          | 0         | 0         | 0         | 0         | 0         | 0          | 0          | 0          | 0          | 0         | 0         | 0          |
| Thermobacillus         | 1              | 11             | 0          | 0          | 0          | 0         | 0         | 0         | 0         | 0         | 0          | 0          | 0          | 0          | 0         | 0         | 0          |
| Thermobaculum          | 2              | 62             | 0          | 0          | 0          | 0         | 0         | 0         | 0         | 0         | 0          | 0          | 0          | 0          | 0         | 0         | 0          |
| Thermobifida           | 2              | 72             | 0          | 0          | 0          | 0         | 0         | 1         | 0         | 0         | 0          | 1          | 0          | 0          | 0         | 0         | 0          |
| Thermobispora          | 2              | 109            | 0          | 0          | 0          | 0         | 0         | 1         | 1         | 1         | 0          | 1          | 0          | 0          | 0         | 0         | 0          |
| Thermococcus           | 1              | 13             | 0          | 0          | 0          | 0         | 0         | 0         | 0         | 0         | 0          | 0          | 0          | 0          | 0         | 0         | 0          |
| Thermocrinis           | 2              | 60             | 0          | 0          | 0          | 0         | 0         | 0         | 0         | 0         | 0          | 0          | 0          | 0          | 0         | 0         | 0          |
| Thermodesulfator       | 1              | 10             | 0          | 0          | 0          | 0         | 0         | 0         | 0         | 0         | 0          | 0          | 0          | 0          | 0         | 0         | 0          |
| Thermodesulfobacterium | 1              | 9              | 0          | 0          | 0          | 0         | 0         | 0         | 0         | 0         | 0          | 0          | 0          | 0          | 0         | 0         | 0          |



| Genus                | Cluster Number | Protein Counts | 1.14.12.10 | 1.14.12.13 | 1.14.12.18 | 1.14.12.3 | 1.14.12.7 | 1.14.13.- | 1.14.13.1 | 1.14.13.2 | 1.14.13.20 | 1.14.13.22 | 1.14.13.40 | 1.14.13.50 | 1.14.13.7 | 1.14.13.8 | 1.14.13.82 |
|----------------------|----------------|----------------|------------|------------|------------|-----------|-----------|-----------|-----------|-----------|------------|------------|------------|------------|-----------|-----------|------------|
| Thermodesulfobium    | 1              | 13             | 0          | 0          | 0          | 0         | 0         | 0         | 0         | 0         | 0          | 0          | 0          | 0          | 0         | 0         | 0          |
| Thermodesulfovibrio  | 2              | 60             | 0          | 0          | 0          | 0         | 0         | 0         | 0         | 0         | 0          | 0          | 0          | 0          | 0         | 0         | 0          |
| Thermofilum          | 1              | 9              | 0          | 0          | 0          | 0         | 0         | 0         | 0         | 0         | 0          | 0          | 0          | 0          | 0         | 0         | 0          |
| Thermogladus         | 1              | 7              | 0          | 0          | 0          | 0         | 0         | 0         | 0         | 0         | 0          | 0          | 0          | 0          | 0         | 0         | 0          |
| Thermomicrobium      | 2              | 92             | 0          | 0          | 1          | 0         | 0         | 1         | 0         | 0         | 0          | 0          | 0          | 0          | 0         | 0         | 0          |
| Thermomonospora      | 2              | 125            | 0          | 0          | 0          | 0         | 0         | 1         | 1         | 1         | 0          | 1          | 0          | 0          | 1         | 0         | 0          |
| Thermoplasma         | 1              | 11             | 0          | 0          | 0          | 0         | 0         | 0         | 0         | 0         | 0          | 0          | 0          | 0          | 0         | 0         | 0          |
| Thermoplasmatales    | 1              | 6              | 0          | 0          | 0          | 0         | 0         | 0         | 0         | 0         | 0          | 0          | 0          | 0          | 0         | 0         | 0          |
| Thermoproteus        | 1              | 12             | 0          | 0          | 0          | 0         | 0         | 0         | 0         | 0         | 0          | 0          | 0          | 0          | 0         | 0         | 0          |
| Thermosediminibacter | 2              | 64             | 0          | 0          | 0          | 0         | 0         | 0         | 0         | 0         | 0          | 0          | 0          | 0          | 0         | 0         | 0          |
| Thermosipho          | 2              | 70             | 0          | 0          | 0          | 0         | 0         | 1         | 0         | 0         | 0          | 0          | 0          | 0          | 0         | 0         | 0          |
| Thermosphaera        | 1              | 10             | 0          | 0          | 0          | 0         | 0         | 0         | 0         | 0         | 0          | 0          | 0          | 0          | 0         | 0         | 0          |
| Thermosynechococcus  | 1              | 6              | 0          | 0          | 0          | 0         | 0         | 0         | 0         | 0         | 0          | 0          | 0          | 0          | 0         | 0         | 0          |
| Thermotoga           | 2              | 80             | 0          | 0          | 0          | 0         | 0         | 1         | 0         | 0         | 0          | 0          | 0          | 0          | 0         | 0         | 0          |
| Thermovibrio         | 2              | 58             | 0          | 0          | 0          | 0         | 0         | 1         | 0         | 0         | 0          | 0          | 0          | 0          | 0         | 0         | 0          |
| Thermovirga          | 1              | 9              | 0          | 0          | 0          | 0         | 0         | 0         | 0         | 0         | 0          | 0          | 0          | 0          | 0         | 0         | 0          |
| Thermus              | 2              | 107            | 0          | 0          | 0          | 0         | 0         | 1         | 0         | 1         | 0          | 0          | 0          | 0          | 0         | 0         | 0          |
| Thioalkalimicrobium  | 1              | 4              | 0          | 0          | 0          | 0         | 0         | 0         | 0         | 0         | 0          | 0          | 0          | 0          | 0         | 0         | 0          |
| Thioalkalivibrio     | 2              | 91             | 0          | 0          | 0          | 0         | 0         | 1         | 0         | 0         | 0          | 0          | 0          | 0          | 0         | 0         | 0          |
| Thiobaca             | 1              | 2              | 0          | 0          | 0          | 0         | 0         | 0         | 0         | 0         | 0          | 0          | 0          | 0          | 0         | 0         | 0          |
| Thiobacillus         | 2              | 67             | 0          | 0          | 0          | 0         | 0         | 1         | 0         | 0         | 0          | 0          | 0          | 0          | 0         | 0         | 0          |
| Thiocapsa            | 1              | 2              | 0          | 0          | 0          | 0         | 0         | 0         | 0         | 0         | 0          | 0          | 0          | 0          | 0         | 0         | 0          |
| Thiocystis           | 1              | 11             | 0          | 0          | 0          | 0         | 0         | 0         | 0         | 0         | 0          | 0          | 0          | 0          | 0         | 0         | 0          |
| Thioflavococcus      | 1              | 13             | 0          | 0          | 0          | 0         | 0         | 0         | 0         | 0         | 0          | 0          | 0          | 0          | 0         | 0         | 0          |
| Thiomicrospira       | 2              | 50             | 0          | 0          | 0          | 0         | 0         | 1         | 0         | 0         | 0          | 0          | 0          | 0          | 0         | 0         | 0          |
| Thiomonas            | 2              | 85             | 0          | 0          | 0          | 0         | 0         | 1         | 0         | 0         | 0          | 0          | 0          | 0          | 0         | 0         | 0          |
| Thiorhodococcus      | 1              | 2              | 0          | 0          | 0          | 0         | 0         | 0         | 0         | 0         | 0          | 0          | 0          | 0          | 0         | 0         | 0          |
| Thiothrix            | 1              | 2              | 0          | 0          | 0          | 0         | 0         | 0         | 0         | 0         | 0          | 0          | 0          | 0          | 0         | 0         | 0          |
| Tistrella            | 1              | 42             | 0          | 0          | 0          | 0         | 0         | 0         | 0         | 0         | 0          | 0          | 0          | 0          | 0         | 0         | 0          |
| Tolumonas            | 2              | 100            | 0          | 0          | 0          | 0         | 0         | 1         | 0         | 0         | 0          | 0          | 0          | 0          | 0         | 0         | 0          |
| Transposon           | 1              | 2              | 0          | 0          | 0          | 0         | 0         | 0         | 0         | 0         | 0          | 0          | 0          | 0          | 0         | 0         | 0          |
| Treponema            | 1              | 63             | 0          | 0          | 0          | 0         | 0         | 0         | 0         | 0         | 0          | 0          | 0          | 0          | 0         | 0         | 0          |
| Trichodesmium        | 2              | 71             | 0          | 0          | 0          | 0         | 0         | 1         | 1         | 0         | 0          | 1          | 0          | 0          | 0         | 1         | 0          |
| Trichormus           | 1              | 12             | 0          | 0          | 0          | 0         | 0         | 0         | 0         | 0         | 0          | 0          | 0          | 0          | 0         | 0         | 0          |
| Tropheryma           | 2              | 22             | 0          | 0          | 0          | 0         | 0         | 0         | 0         | 0         | 0          | 0          | 0          | 0          | 0         | 0         | 0          |
| Truepera             | 2              | 104            | 0          | 0          | 0          | 0         | 0         | 1         | 0         | 0         | 0          | 0          | 0          | 0          | 0         | 0         | 0          |
| Tsukamurella         | 2              | 123            | 0          | 0          | 0          | 0         | 0         | 1         | 1         | 0         | 0          | 1          | 0          | 0          | 0         | 0         | 0          |
| Turneriella          | 1              | 16             | 0          | 0          | 0          | 0         | 0         | 0         | 0         | 0         | 0          | 0          | 0          | 0          | 0         | 0         | 0          |
| Uliginosibacterium   | 1              | 2              | 0          | 0          | 0          | 0         | 0         | 0         | 0         | 0         | 0          | 0          | 0          | 0          | 0         | 0         | 0          |
| Ureaplasma           | 1              | 24             | 0          | 0          | 0          | 0         | 0         | 0         | 0         | 0         | 0          | 0          | 0          | 0          | 0         | 0         | 0          |
| Ureibacillus         | 1              | 2              | 0          | 0          | 0          | 0         | 0         | 0         | 0         | 0         | 0          | 0          | 0          | 0          | 0         | 0         | 0          |
| Variovorax           | 3              | 187            | 0          | 1          | 0          | 0         | 1         | 1         | 1         | 1         | 0          | 0          | 1          | 0          | 0         | 0         | 1          |
| Veillonella          | 1              | 54             | 0          | 0          | 0          | 0         | 0         | 0         | 0         | 0         | 0          | 0          | 0          | 0          | 0         | 0         | 0          |
| Verminephrobacter    | 3              | 188            | 0          | 1          | 0          | 1         | 1         | 1         | 0         | 1         | 0          | 0          | 0          | 0          | 1         | 0         | 1          |
| Verrucosispora       | 3              | 126            | 0          | 0          | 0          | 0         | 0         | 1         | 1         | 1         | 0          | 0          | 0          | 0          | 0         | 0         | 0          |
| Vibrio               | 2              | 195            | 0          | 0          | 0          | 0         | 0         | 1         | 0         | 0         | 0          | 0          | 0          | 0          | 0         | 0         | 0          |
| Vibrionales          | 1              | 46             | 0          | 0          | 0          | 0         | 0         | 0         | 0         | 0         | 0          | 0          | 0          | 0          | 0         | 0         | 0          |
| Vitreoscilla         | 1              | 1              | 0          | 0          | 0          | 0         | 0         | 0         | 0         | 0         | 0          | 0          | 0          | 0          | 0         | 0         | 0          |
| Vulcanisaeta         | 1              | 14             | 0          | 0          | 0          | 0         | 0         | 0         | 0         | 0         | 0          | 0          | 0          | 0          | 0         | 0         | 0          |
| Waddlia              | 2              | 68             | 0          | 0          | 0          | 0         | 0         | 0         | 0         | 0         | 0          | 0          | 0          | 0          | 1         | 0         | 0          |
| Wautersia            | 1              | 2              | 0          | 0          | 0          | 0         | 0         | 0         | 0         | 0         | 0          | 0          | 0          | 0          | 1         | 0         | 0          |
| Weeksella            | 2              | 65             | 0          | 0          | 0          | 0         | 0         | 1         | 0         | 0         | 0          | 0          | 0          | 0          | 0         | 0         | 0          |

| Genus             | Cluster Number | Protein Counts | 1.14.12.10 | 1.14.12.13 | 1.14.12.18 | 1.14.12.3 | 1.14.12.7 | 1.14.13.- | 1.14.13.1 | 1.14.13.2 | 1.14.13.20 | 1.14.13.22 | 1.14.13.40 | 1.14.13.50 | 1.14.13.7 | 1.14.13.8 | 1.14.13.82 |
|-------------------|----------------|----------------|------------|------------|------------|-----------|-----------|-----------|-----------|-----------|------------|------------|------------|------------|-----------|-----------|------------|
| Weissella         | 1              | 14             | 0          | 0          | 0          | 0         | 0         | 0         | 0         | 0         | 0          | 0          | 0          | 0          | 0         | 0         | 0          |
| Wenxinia          | 1              | 2              | 0          | 0          | 0          | 0         | 0         | 0         | 0         | 0         | 0          | 0          | 0          | 0          | 0         | 0         | 0          |
| Wigglesworthia    | 1              | 29             | 0          | 0          | 0          | 0         | 0         | 1         | 0         | 0         | 0          | 0          | 0          | 0          | 0         | 0         | 0          |
| Wolbachia         | 1              | 32             | 0          | 0          | 0          | 0         | 0         | 1         | 0         | 0         | 0          | 0          | 0          | 0          | 0         | 0         | 0          |
| Wolinella         | 2              | 51             | 0          | 0          | 0          | 0         | 0         | 0         | 0         | 0         | 0          | 0          | 0          | 0          | 0         | 0         | 0          |
| Xanthobacter      | 3              | 176            | 1          | 0          | 0          | 0         | 0         | 1         | 1         | 1         | 0          | 0          | 0          | 0          | 0         | 0         | 0          |
| Xanthobacteraceae | 1              | 4              | 0          | 0          | 0          | 0         | 0         | 0         | 0         | 0         | 0          | 0          | 0          | 0          | 0         | 0         | 0          |
| Xanthomonadaceae  | 1              | 39             | 0          | 0          | 0          | 0         | 0         | 1         | 0         | 0         | 0          | 0          | 0          | 0          | 0         | 0         | 0          |
| Xanthomonas       | 2              | 162            | 0          | 0          | 0          | 0         | 0         | 1         | 0         | 1         | 0          | 0          | 0          | 0          | 0         | 0         | 1          |
| Xenorhabdus       | 2              | 127            | 0          | 0          | 0          | 0         | 0         | 1         | 0         | 0         | 0          | 1          | 1          | 0          | 0         | 0         | 0          |
| Xylanimonas       | 2              | 66             | 0          | 0          | 0          | 0         | 0         | 1         | 0         | 0         | 0          | 0          | 1          | 0          | 0         | 0         | 0          |
| Xylella           | 2              | 52             | 0          | 0          | 0          | 0         | 0         | 1         | 0         | 0         | 0          | 0          | 0          | 0          | 0         | 0         | 0          |
| Yersinia          | 2              | 145            | 1          | 0          | 0          | 0         | 0         | 1         | 0         | 0         | 0          | 0          | 0          | 0          | 0         | 0         | 1          |
| Yokenella         | 2              | 61             | 0          | 0          | 0          | 0         | 0         | 0         | 0         | 0         | 0          | 0          | 0          | 0          | 0         | 0         | 1          |
| Zobellia          | 1              | 28             | 0          | 0          | 0          | 0         | 0         | 0         | 0         | 0         | 0          | 0          | 0          | 0          | 0         | 0         | 0          |
| Zunongwangia      | 2              | 98             | 0          | 0          | 0          | 0         | 0         | 1         | 0         | 0         | 0          | 0          | 0          | 0          | 0         | 0         | 0          |
| Zymomonas         | 2              | 67             | 0          | 0          | 0          | 0         | 0         | 1         | 0         | 0         | 0          | 0          | 0          | 0          | 0         | 0         | 0          |
| Zymophilus        | 1              | 2              | 0          | 0          | 0          | 0         | 0         | 0         | 0         | 0         | 0          | 0          | 0          | 0          | 0         | 0         | 0          |

| Genus               | Cluster Number | Protein Counts | 1.14.14.1 | 1.14.99.- | 1.17.3.2 | 1.17.99.1 | 1.17.99.2 | 1.18.6.1 | 1.2.1.- | 1.2.1.10 | 1.2.1.28 | 1.2.1.3 | 1.2.1.39 | 1.2.1.5 | 1.2.1.65 | 1.2.7.1 | 1.2.99.2 | 1.3.1.- | 1.3.1.2 | 1.3.1.25 |
|---------------------|----------------|----------------|-----------|-----------|----------|-----------|-----------|----------|---------|----------|----------|---------|----------|---------|----------|---------|----------|---------|---------|----------|
| Acaricomes          | 1              | 2              | 0         | 0         | 0        | 0         | 0         | 0        | 0       | 0        | 0        | 0       | 0        | 0       | 0        | 0       | 0        | 0       | 0       | 0        |
| Acaryochloris       | 2              | 88             | 0         | 1         | 0        | 0         | 0         | 0        | 0       | 1        | 0        | 1       | 0        | 0       | 0        | 0       | 0        | 0       | 0       | 0        |
| Acetivibrio         | 1              | 2              | 0         | 0         | 0        | 0         | 0         | 0        | 0       | 0        | 0        | 0       | 0        | 0       | 0        | 1       | 0        | 0       | 0       | 0        |
| Acetobacter         | 2              | 85             | 0         | 1         | 0        | 0         | 0         | 0        | 0       | 0        | 0        | 1       | 1        | 0       | 0        | 0       | 0        | 0       | 1       | 0        |
| Acetobacteraceae    | 1              | 2              | 0         | 0         | 0        | 0         | 0         | 0        | 0       | 0        | 0        | 0       | 0        | 0       | 0        | 0       | 0        | 0       | 0       | 0        |
| Acetobacterium      | 1              | 8              | 0         | 0         | 0        | 0         | 0         | 0        | 0       | 0        | 0        | 0       | 0        | 0       | 0        | 0       | 0        | 0       | 0       | 0        |
| Acetohalobium       | 2              | 79             | 0         | 0         | 0        | 0         | 0         | 0        | 0       | 0        | 0        | 0       | 0        | 0       | 0        | 1       | 1        | 0       | 0       | 0        |
| Acholeplasma        | 2              | 38             | 0         | 1         | 0        | 0         | 0         | 0        | 0       | 0        | 0        | 1       | 0        | 0       | 0        | 0       | 0        | 0       | 0       | 0        |
| Achromobacter       | 2              | 192            | 0         | 0         | 0        | 1         | 0         | 0        | 0       | 1        | 0        | 1       | 1        | 0       | 0        | 0       | 1        | 0       | 0       | 0        |
| Acidaminococcus     | 1              | 65             | 0         | 0         | 0        | 0         | 0         | 0        | 0       | 0        | 0        | 0       | 0        | 0       | 0        | 0       | 0        | 0       | 0       | 0        |
| Acidianus           | 1              | 9              | 0         | 0         | 0        | 0         | 0         | 0        | 0       | 0        | 0        | 0       | 0        | 0       | 0        | 0       | 0        | 0       | 0       | 0        |
| Acidilobus          | 1              | 8              | 0         | 0         | 0        | 0         | 0         | 0        | 0       | 0        | 0        | 0       | 0        | 0       | 0        | 0       | 0        | 0       | 0       | 0        |
| Acidimicrobium      | 2              | 58             | 0         | 1         | 0        | 0         | 0         | 0        | 0       | 0        | 0        | 1       | 0        | 0       | 0        | 0       | 1        | 0       | 0       | 0        |
| Acidiphilium        | 3              | 144            | 0         | 1         | 0        | 0         | 0         | 0        | 0       | 0        | 0        | 1       | 0        | 0       | 0        | 0       | 1        | 0       | 0       | 0        |
| Acidithiobacillus   | 2              | 70             | 0         | 0         | 0        | 0         | 0         | 1        | 0       | 0        | 0        | 1       | 0        | 0       | 0        | 0       | 0        | 0       | 0       | 0        |
| Acidobacterium      | 2              | 91             | 0         | 0         | 0        | 0         | 0         | 0        | 0       | 0        | 0        | 1       | 0        | 0       | 0        | 0       | 0        | 0       | 0       | 0        |
| Acidocella          | 1              | 2              | 0         | 0         | 0        | 0         | 0         | 0        | 0       | 0        | 0        | 0       | 0        | 0       | 0        | 0       | 0        | 0       | 0       | 0        |
| Acidothermus        | 2              | 68             | 0         | 0         | 0        | 0         | 0         | 0        | 0       | 0        | 0        | 1       | 0        | 0       | 0        | 1       | 0        | 0       | 0       | 0        |
| Acidovorax          | 3              | 217            | 0         | 1         | 0        | 0         | 0         | 0        | 0       | 1        | 1        | 1       | 0        | 0       | 0        | 1       | 0        | 1       | 1       | 0        |
| Aciduliprofundum    | 1              | 11             | 0         | 0         | 0        | 0         | 0         | 0        | 0       | 0        | 0        | 0       | 0        | 0       | 0        | 0       | 0        | 0       | 0       | 0        |
| Acinetobacter       | 3              | 188            | 0         | 0         | 0        | 0         | 0         | 0        | 0       | 0        | 1        | 1       | 1        | 0       | 0        | 0       | 0        | 0       | 0       | 1        |
| Actinobacillus      | 2              | 112            | 0         | 0         | 0        | 0         | 0         | 0        | 0       | 0        | 0        | 1       | 0        | 0       | 0        | 0       | 0        | 0       | 0       | 0        |
| Actinomadura        | 1              | 1              | 0         | 0         | 0        | 0         | 0         | 0        | 0       | 0        | 0        | 0       | 0        | 0       | 0        | 0       | 0        | 0       | 0       | 0        |
| Actinoplanes        | 1              | 52             | 0         | 0         | 0        | 0         | 0         | 0        | 0       | 0        | 0        | 0       | 0        | 0       | 0        | 0       | 0        | 0       | 0       | 0        |
| Actinopolyspora     | 1              | 2              | 0         | 0         | 0        | 0         | 0         | 0        | 0       | 0        | 0        | 0       | 0        | 0       | 0        | 0       | 0        | 0       | 0       | 0        |
| Actinosynnema       | 2              | 122            | 0         | 1         | 0        | 0         | 0         | 0        | 0       | 0        | 1        | 1       | 0        | 0       | 0        | 0       | 0        | 0       | 0       | 0        |
| Advenella           | 1              | 30             | 0         | 0         | 0        | 0         | 0         | 0        | 0       | 0        | 0        | 0       | 0        | 0       | 0        | 0       | 0        | 0       | 0       | 0        |
| Aequorivita         | 1              | 12             | 0         | 0         | 0        | 0         | 0         | 0        | 0       | 0        | 0        | 0       | 0        | 0       | 0        | 0       | 0        | 0       | 0       | 0        |
| Aerococcus          | 2              | 57             | 0         | 0         | 0        | 0         | 0         | 0        | 0       | 0        | 0        | 1       | 0        | 0       | 0        | 0       | 0        | 0       | 0       | 0        |
| Aeromonas           | 2              | 127            | 0         | 0         | 0        | 0         | 0         | 0        | 0       | 1        | 0        | 1       | 0        | 0       | 0        | 0       | 0        | 0       | 0       | 0        |
| Aeropyrum           | 1              | 13             | 0         | 0         | 0        | 0         | 0         | 0        | 0       | 0        | 0        | 0       | 0        | 0       | 0        | 0       | 0        | 0       | 0       | 0        |
| Afipia              | 1              | 54             | 0         | 0         | 0        | 0         | 0         | 0        | 0       | 0        | 0        | 1       | 0        | 0       | 0        | 0       | 1        | 0       | 0       | 0        |
| Aggregatibacter     | 1              | 81             | 0         | 0         | 0        | 0         | 0         | 0        | 0       | 0        | 0        | 0       | 0        | 0       | 0        | 0       | 0        | 0       | 0       | 0        |
| Agrobacterium       | 2              | 242            | 0         | 0         | 1        | 0         | 0         | 0        | 0       | 1        | 0        | 1       | 0        | 0       | 1        | 0       | 1        | 0       | 1       | 1        |
| Ahrensia            | 1              | 2              | 0         | 0         | 0        | 0         | 0         | 0        | 0       | 0        | 0        | 0       | 0        | 0       | 0        | 0       | 0        | 0       | 0       | 0        |
| Akkermansia         | 2              | 47             | 0         | 0         | 0        | 0         | 0         | 0        | 0       | 0        | 0        | 0       | 0        | 0       | 0        | 0       | 0        | 0       | 0       | 0        |
| Albidiferax         | 3              | 144            | 0         | 0         | 0        | 0         | 0         | 0        | 0       | 1        | 0        | 1       | 0        | 0       | 0        | 1       | 0        | 0       | 0       | 0        |
| Alcaligenes         | 1              | 21             | 0         | 0         | 0        | 0         | 0         | 1        | 0       | 0        | 0        | 0       | 0        | 0       | 0        | 0       | 0        | 0       | 0       | 0        |
| Alcanivorax         | 2              | 146            | 0         | 1         | 0        | 0         | 0         | 0        | 0       | 0        | 0        | 1       | 0        | 0       | 0        | 0       | 0        | 0       | 0       | 0        |
| Alicyclophilus      | 3              | 152            | 0         | 0         | 0        | 0         | 1         | 0        | 0       | 1        | 0        | 1       | 0        | 0       | 0        | 0       | 1        | 0       | 0       | 1        |
| Alicyclobacillus    | 2              | 91             | 0         | 1         | 0        | 0         | 0         | 0        | 0       | 1        | 0        | 1       | 0        | 0       | 0        | 0       | 0        | 0       | 0       | 0        |
| Aliivibrio          | 2              | 118            | 0         | 0         | 0        | 0         | 0         | 0        | 0       | 1        | 0        | 1       | 0        | 0       | 0        | 0       | 0        | 0       | 0       | 0        |
| Alishewanella       | 1              | 1              | 0         | 0         | 0        | 0         | 0         | 0        | 0       | 0        | 0        | 0       | 0        | 0       | 0        | 0       | 0        | 0       | 0       | 0        |
| Alistipes           | 1              | 52             | 0         | 0         | 0        | 0         | 0         | 0        | 0       | 0        | 0        | 1       | 0        | 0       | 0        | 0       | 0        | 0       | 0       | 0        |
| Alkalilimnicola     | 2              | 97             | 0         | 0         | 0        | 0         | 0         | 0        | 0       | 1        | 0        | 1       | 0        | 0       | 0        | 0       | 1        | 0       | 0       | 0        |
| Alkaliphilus        | 2              | 62             | 0         | 0         | 0        | 0         | 0         | 0        | 0       | 0        | 0        | 1       | 0        | 0       | 0        | 0       | 0        | 0       | 0       | 0        |
| Allochromatium      | 2              | 84             | 0         | 1         | 0        | 0         | 0         | 1        | 0       | 0        | 0        | 0       | 0        | 0       | 0        | 0       | 0        | 0       | 0       | 0        |
| Alphaproteobacteria | 1              | 3              | 0         | 0         | 0        | 0         | 0         | 0        | 0       | 0        | 0        | 0       | 0        | 0       | 0        | 0       | 0        | 0       | 0       | 0        |
| Alteromonadales     | 1              | 12             | 0         | 0         | 0        | 0         | 0         | 0        | 0       | 0        | 0        | 0       | 0        | 0       | 0        | 0       | 0        | 0       | 0       | 0        |
| Alteromonas         | 1              | 37             | 0         | 0         | 0        | 0         | 0         | 0        | 0       | 0        | 0        | 0       | 0        | 0       | 0        | 0       | 0        | 0       | 0       | 0        |
| Aminobacter         | 1              | 4              | 0         | 0         | 0        | 0         | 0         | 0        | 0       | 0        | 0        | 0       | 0        | 0       | 0        | 0       | 0        | 0       | 0       | 0        |
| Aminobacterium      | 2              | 59             | 0         | 0         | 0        | 0         | 0         | 0        | 0       | 0        | 0        | 0       | 0        | 0       | 0        | 1       | 0        | 0       | 0       | 0        |

| Genus            | Cluster Number | Protein Counts | 1.14.14.1 | 1.14.99.- | 1.17.3.2 | 1.17.99.1 | 1.17.99.2 | 1.18.6.1 | 1.2.1.- | 1.2.1.10 | 1.2.1.28 | 1.2.1.3 | 1.2.1.39 | 1.2.1.5 | 1.2.1.65 | 1.2.7.1 | 1.2.99.2 | 1.3.1.- | 1.3.1.2 | 1.3.1.25 |
|------------------|----------------|----------------|-----------|-----------|----------|-----------|-----------|----------|---------|----------|----------|---------|----------|---------|----------|---------|----------|---------|---------|----------|
| Ammonifex        | 2              | 50             | 0         | 0         | 0        | 0         | 0         | 0        | 0       | 0        | 0        | 0       | 0        | 0       | 0        | 0       | 1        | 0       | 0       | 0        |
| Amphibacillus    | 1              | 13             | 0         | 0         | 0        | 0         | 0         | 0        | 0       | 0        | 0        | 0       | 0        | 0       | 0        | 0       | 0        | 0       | 0       | 0        |
| Amphritea        | 1              | 2              | 0         | 0         | 0        | 0         | 0         | 0        | 0       | 0        | 0        | 0       | 0        | 0       | 0        | 0       | 0        | 0       | 0       | 0        |
| Amycolatopsis    | 2              | 201            | 0         | 1         | 0        | 0         | 0         | 0        | 0       | 1        | 0        | 1       | 0        | 0       | 0        | 0       | 1        | 0       | 0       | 0        |
| Amycolicoccus    | 1              | 43             | 0         | 0         | 0        | 0         | 0         | 0        | 0       | 0        | 0        | 0       | 0        | 0       | 0        | 0       | 0        | 0       | 0       | 0        |
| Anabaena         | 2              | 92             | 0         | 1         | 0        | 0         | 0         | 1        | 0       | 0        | 0        | 1       | 0        | 0       | 0        | 0       | 0        | 0       | 0       | 0        |
| Anaerobaculum    | 1              | 11             | 0         | 0         | 0        | 0         | 0         | 0        | 0       | 0        | 0        | 0       | 0        | 0       | 0        | 0       | 0        | 0       | 0       | 0        |
| Anaerococcus     | 2              | 46             | 0         | 0         | 0        | 0         | 0         | 0        | 0       | 0        | 0        | 1       | 0        | 0       | 0        | 0       | 0        | 0       | 0       | 0        |
| Anaerolinea      | 2              | 66             | 0         | 1         | 0        | 0         | 0         | 0        | 0       | 0        | 0        | 0       | 0        | 0       | 0        | 0       | 1        | 0       | 0       | 0        |
| Anaeromyxobacter | 3              | 117            | 0         | 0         | 0        | 0         | 0         | 1        | 0       | 0        | 0        | 1       | 0        | 0       | 0        | 0       | 0        | 0       | 0       | 0        |
| Anaerostipes     | 1              | 44             | 0         | 0         | 0        | 0         | 0         | 0        | 0       | 0        | 0        | 1       | 0        | 0       | 0        | 1       | 0        | 0       | 1       | 0        |
| Anaerotruncus    | 1              | 2              | 0         | 0         | 0        | 0         | 0         | 0        | 0       | 0        | 0        | 0       | 0        | 0       | 0        | 0       | 0        | 0       | 0       | 0        |
| Anaplasma        | 1              | 35             | 0         | 0         | 0        | 0         | 0         | 0        | 0       | 0        | 0        | 0       | 0        | 0       | 0        | 0       | 0        | 0       | 0       | 0        |
| Ancylobacter     | 1              | 3              | 0         | 0         | 0        | 0         | 0         | 0        | 0       | 0        | 0        | 0       | 0        | 0       | 0        | 0       | 0        | 0       | 0       | 0        |
| Aneurinibacillus | 1              | 1              | 0         | 0         | 0        | 0         | 0         | 0        | 0       | 0        | 0        | 1       | 0        | 0       | 0        | 0       | 0        | 0       | 0       | 0        |
| Angomonas        | 1              | 1              | 0         | 0         | 0        | 0         | 0         | 0        | 0       | 0        | 0        | 0       | 0        | 0       | 0        | 0       | 0        | 0       | 0       | 0        |
| Anoxybacillus    | 2              | 72             | 0         | 1         | 0        | 0         | 0         | 0        | 0       | 0        | 0        | 1       | 0        | 0       | 0        | 0       | 0        | 0       | 0       | 0        |
| Aquifex          | 2              | 45             | 0         | 0         | 0        | 0         | 0         | 0        | 0       | 0        | 0        | 1       | 0        | 0       | 0        | 1       | 0        | 0       | 0       | 0        |
| Aquimarina       | 1              | 2              | 0         | 0         | 0        | 0         | 0         | 0        | 0       | 0        | 0        | 0       | 0        | 0       | 0        | 0       | 0        | 0       | 0       | 0        |
| Arcanobacterium  | 2              | 45             | 0         | 0         | 0        | 0         | 0         | 0        | 0       | 0        | 0        | 0       | 0        | 0       | 0        | 0       | 0        | 0       | 0       | 0        |
| Archaeoglobus    | 1              | 14             | 0         | 0         | 0        | 0         | 0         | 0        | 0       | 0        | 0        | 0       | 0        | 0       | 0        | 0       | 0        | 0       | 0       | 0        |
| Arcobacter       | 2              | 101            | 0         | 0         | 0        | 0         | 0         | 1        | 0       | 0        | 0        | 1       | 0        | 0       | 0        | 1       | 0        | 0       | 0       | 0        |
| Aromatoleum      | 3              | 133            | 0         | 0         | 0        | 1         | 1         | 0        | 0       | 0        | 1        | 1       | 0        | 0       | 0        | 1       | 0        | 0       | 0       | 0        |
| Arsenophonus     | 1              | 4              | 0         | 0         | 0        | 0         | 0         | 0        | 0       | 0        | 0        | 0       | 0        | 0       | 0        | 0       | 0        | 0       | 0       | 0        |
| Arthrobacter     | 2              | 206            | 0         | 1         | 0        | 0         | 0         | 0        | 0       | 0        | 0        | 1       | 0        | 0       | 0        | 0       | 1        | 1       | 0       | 1        |
| Arthrospira      | 2              | 67             | 0         | 1         | 0        | 0         | 0         | 0        | 0       | 1        | 0        | 1       | 0        | 0       | 0        | 0       | 0        | 0       | 0       | 0        |
| Aster            | 1              | 10             | 0         | 0         | 0        | 0         | 0         | 0        | 0       | 0        | 0        | 0       | 0        | 0       | 0        | 0       | 0        | 0       | 0       | 0        |
| Asticcacaulis    | 2              | 103            | 0         | 0         | 0        | 0         | 0         | 0        | 1       | 0        | 0        | 1       | 0        | 0       | 0        | 0       | 0        | 0       | 0       | 0        |
| Atopobium        | 1              | 28             | 0         | 0         | 0        | 0         | 0         | 0        | 0       | 0        | 0        | 0       | 0        | 0       | 0        | 0       | 0        | 0       | 0       | 0        |
| Aurantimonas     | 1              | 2              | 0         | 0         | 0        | 0         | 0         | 0        | 0       | 0        | 0        | 0       | 0        | 0       | 0        | 0       | 0        | 0       | 0       | 0        |
| Avibacterium     | 1              | 17             | 0         | 0         | 0        | 0         | 0         | 0        | 0       | 0        | 0        | 0       | 0        | 0       | 0        | 0       | 0        | 0       | 0       | 0        |
| Azoarcus         | 3              | 172            | 0         | 0         | 0        | 0         | 1         | 1        | 0       | 1        | 1        | 1       | 0        | 0       | 0        | 0       | 0        | 0       | 0       | 0        |
| Azorhizobium     | 3              | 149            | 0         | 0         | 0        | 0         | 0         | 1        | 0       | 0        | 0        | 1       | 0        | 0       | 0        | 0       | 1        | 0       | 0       | 0        |
| Azorhizophilus   | 1              | 4              | 0         | 0         | 0        | 0         | 0         | 1        | 0       | 0        | 0        | 0       | 0        | 0       | 0        | 0       | 0        | 0       | 0       | 0        |
| Azospira         | 1              | 19             | 0         | 0         | 0        | 0         | 0         | 0        | 0       | 0        | 0        | 0       | 0        | 0       | 0        | 0       | 0        | 0       | 0       | 0        |
| Azospirillum     | 2              | 198            | 0         | 1         | 0        | 0         | 0         | 1        | 0       | 0        | 1        | 1       | 0        | 0       | 0        | 0       | 1        | 0       | 1       | 1        |
| Azotobacter      | 3              | 183            | 0         | 0         | 0        | 0         | 0         | 1        | 0       | 1        | 0        | 1       | 0        | 0       | 0        | 0       | 1        | 1       | 0       | 1        |
| Bacillales       | 1              | 9              | 0         | 0         | 0        | 0         | 0         | 0        | 0       | 0        | 0        | 0       | 0        | 0       | 0        | 0       | 0        | 0       | 0       | 0        |
| Bacilli          | 1              | 3              | 0         | 0         | 0        | 0         | 0         | 0        | 0       | 0        | 0        | 0       | 0        | 0       | 0        | 0       | 0        | 0       | 0       | 0        |
| Bacillus         | 2              | 237            | 0         | 1         | 0        | 0         | 0         | 0        | 0       | 1        | 0        | 1       | 1        | 0       | 0        | 1       | 0        | 0       | 1       | 0        |
| Bacteria         | 2              | 86             | 0         | 0         | 0        | 0         | 0         | 0        | 0       | 0        | 0        | 1       | 0        | 0       | 0        | 0       | 0        | 0       | 1       | 0        |
| Bacteriovorax    | 2              | 98             | 0         | 1         | 0        | 0         | 0         | 0        | 0       | 0        | 0        | 1       | 0        | 0       | 0        | 0       | 0        | 0       | 0       | 0        |
| Bacteroidales    | 2              | 59             | 0         | 0         | 0        | 0         | 0         | 0        | 0       | 0        | 0        | 0       | 0        | 0       | 0        | 0       | 0        | 0       | 0       | 0        |
| Bacteroides      | 2              | 96             | 0         | 0         | 0        | 0         | 0         | 0        | 0       | 0        | 0        | 0       | 0        | 0       | 0        | 0       | 0        | 1       | 1       | 0        |
| Bacteroidetes    | 1              | 2              | 0         | 0         | 0        | 0         | 0         | 0        | 0       | 0        | 0        | 0       | 0        | 0       | 0        | 0       | 0        | 0       | 0       | 0        |
| Bartonella       | 2              | 50             | 0         | 0         | 0        | 0         | 0         | 0        | 0       | 0        | 0        | 1       | 0        | 0       | 0        | 0       | 0        | 0       | 0       | 0        |
| Baumannia        | 2              | 24             | 0         | 0         | 0        | 0         | 0         | 0        | 0       | 0        | 0        | 0       | 0        | 0       | 0        | 0       | 0        | 0       | 0       | 0        |
| Bdellovibrio     | 2              | 87             | 0         | 0         | 0        | 0         | 0         | 0        | 0       | 0        | 0        | 1       | 0        | 0       | 0        | 0       | 0        | 0       | 0       | 0        |
| Beijerinckia     | 3              | 123            | 0         | 1         | 0        | 0         | 0         | 1        | 0       | 0        | 0        | 1       | 0        | 0       | 0        | 0       | 0        | 0       | 0       | 0        |
| Belliella        | 1              | 14             | 0         | 0         | 0        | 0         | 0         | 0        | 0       | 0        | 0        | 0       | 0        | 0       | 0        | 0       | 0        | 0       | 0       | 0        |
| Beutenbergia     | 2              | 82             | 0         | 1         | 0        | 0         | 0         | 0        | 0       | 0        | 0        | 1       | 0        | 0       | 0        | 0       | 0        | 0       | 0       | 0        |
| Bifidobacterium  | 2              | 61             | 0         | 0         | 0        | 0         | 0         | 0        | 0       | 1        | 0        | 1       | 0        | 0       | 0        | 0       | 0        | 0       | 0       | 0        |

| Genus                | Cluster Number | Protein Counts | 1.14.14.1 | 1.14.99.- | 1.17.3.2 | 1.17.99.1 | 1.17.99.2 | 1.18.6.1 | 1.2.1.- | 1.2.1.10 | 1.2.1.28 | 1.2.1.3 | 1.2.1.39 | 1.2.1.5 | 1.2.1.65 | 1.2.7.1 | 1.2.99.2 | 1.3.1.- | 1.3.1.2 | 1.3.1.25 |
|----------------------|----------------|----------------|-----------|-----------|----------|-----------|-----------|----------|---------|----------|----------|---------|----------|---------|----------|---------|----------|---------|---------|----------|
| Bizionia             | 1              | 1              | 0         | 0         | 0        | 0         | 0         | 0        | 0       | 0        | 0        | 0       | 0        | 0       | 0        | 0       | 0        | 0       | 0       | 0        |
| Blastococcus         | 1              | 39             | 0         | 0         | 0        | 0         | 0         | 0        | 0       | 0        | 0        | 0       | 0        | 0       | 0        | 0       | 0        | 0       | 0       | 0        |
| Blattabacterium      | 1              | 23             | 0         | 0         | 0        | 0         | 0         | 0        | 0       | 0        | 0        | 0       | 0        | 0       | 0        | 0       | 0        | 0       | 0       | 0        |
| Blautia              | 1              | 22             | 0         | 0         | 0        | 0         | 0         | 0        | 0       | 0        | 0        | 0       | 0        | 0       | 0        | 0       | 0        | 0       | 0       | 0        |
| Bordetella           | 3              | 227            | 0         | 0         | 0        | 0         | 0         | 0        | 0       | 1        | 1        | 1       | 0        | 0       | 0        | 0       | 1        | 1       | 0       | 1        |
| Borrelia             | 1              | 32             | 0         | 0         | 0        | 0         | 0         | 0        | 0       | 0        | 0        | 0       | 0        | 0       | 0        | 0       | 0        | 0       | 0       | 0        |
| Brachybacterium      | 1              | 18             | 0         | 0         | 0        | 0         | 0         | 0        | 0       | 0        | 0        | 0       | 0        | 0       | 0        | 0       | 0        | 0       | 0       | 0        |
| Brachymonas          | 1              | 4              | 0         | 0         | 0        | 0         | 0         | 0        | 0       | 0        | 0        | 0       | 0        | 0       | 0        | 0       | 0        | 0       | 0       | 0        |
| Brachyspira          | 2              | 79             | 0         | 0         | 0        | 0         | 0         | 0        | 0       | 1        | 0        | 1       | 0        | 0       | 0        | 1       | 0        | 0       | 0       | 0        |
| Bradyrhizobiaceae    | 1              | 20             | 0         | 0         | 0        | 0         | 0         | 0        | 0       | 0        | 0        | 0       | 0        | 0       | 0        | 0       | 1        | 0       | 0       | 0        |
| Bradyrhizobium       | 3              | 254            | 0         | 1         | 0        | 0         | 0         | 1        | 0       | 0        | 1        | 1       | 0        | 0       | 0        | 0       | 1        | 0       | 1       | 0        |
| Brenneria            | 1              | 20             | 0         | 0         | 0        | 0         | 0         | 0        | 0       | 0        | 0        | 0       | 0        | 0       | 0        | 0       | 0        | 0       | 0       | 0        |
| Brevibacillus        | 2              | 122            | 0         | 1         | 0        | 0         | 0         | 0        | 0       | 1        | 0        | 1       | 0        | 0       | 0        | 0       | 0        | 0       | 1       | 0        |
| Brevibacterium       | 1              | 4              | 0         | 0         | 0        | 0         | 0         | 0        | 0       | 0        | 0        | 0       | 0        | 0       | 0        | 0       | 0        | 0       | 0       | 0        |
| Brevundimonas        | 2              | 105            | 0         | 1         | 0        | 0         | 0         | 0        | 0       | 0        | 0        | 1       | 0        | 0       | 0        | 0       | 0        | 0       | 0       | 0        |
| Brucella             | 3              | 138            | 0         | 0         | 0        | 0         | 0         | 0        | 0       | 0        | 0        | 1       | 0        | 0       | 0        | 0       | 0        | 0       | 1       | 0        |
| Buchnera             | 1              | 26             | 0         | 0         | 0        | 0         | 0         | 0        | 0       | 0        | 0        | 0       | 0        | 0       | 0        | 0       | 0        | 0       | 0       | 0        |
| Burkholderia         | 3              | 424            | 0         | 1         | 0        | 1         | 0         | 1        | 1       | 1        | 1        | 1       | 1        | 0       | 0        | 0       | 1        | 1       | 1       | 1        |
| Burkholderiaceae     | 3              | 143            | 0         | 0         | 0        | 0         | 0         | 0        | 0       | 1        | 0        | 1       | 0        | 0       | 0        | 0       | 1        | 0       | 0       | 0        |
| Burkholderiales      | 1              | 24             | 0         | 0         | 0        | 0         | 0         | 1        | 0       | 1        | 0        | 0       | 0        | 0       | 0        | 0       | 0        | 0       | 0       | 0        |
| Buttiauxella         | 1              | 2              | 0         | 0         | 0        | 0         | 0         | 0        | 0       | 0        | 0        | 0       | 0        | 0       | 0        | 0       | 0        | 0       | 0       | 0        |
| Butyrivibrio         | 2              | 67             | 0         | 0         | 0        | 0         | 0         | 1        | 0       | 0        | 0        | 1       | 0        | 0       | 0        | 0       | 0        | 0       | 0       | 0        |
| Caldanaerobacter     | 2              | 63             | 0         | 0         | 0        | 0         | 0         | 0        | 0       | 0        | 0        | 0       | 0        | 0       | 0        | 0       | 1        | 0       | 0       | 0        |
| Caldicellulosiruptor | 2              | 75             | 0         | 0         | 0        | 0         | 0         | 1        | 0       | 0        | 0        | 0       | 0        | 0       | 0        | 1       | 1        | 0       | 0       | 0        |
| Caldilinea           | 1              | 23             | 0         | 0         | 0        | 0         | 0         | 0        | 0       | 0        | 0        | 0       | 0        | 0       | 0        | 0       | 0        | 0       | 0       | 0        |
| Caldimonas           | 1              | 6              | 0         | 0         | 0        | 0         | 0         | 0        | 0       | 0        | 0        | 0       | 0        | 0       | 0        | 0       | 0        | 0       | 0       | 0        |
| Caldisericum         | 1              | 10             | 0         | 0         | 0        | 0         | 0         | 0        | 0       | 0        | 0        | 0       | 0        | 0       | 0        | 0       | 0        | 0       | 0       | 0        |
| Caldisphaera         | 1              | 7              | 0         | 0         | 0        | 0         | 0         | 0        | 0       | 0        | 0        | 0       | 0        | 0       | 0        | 0       | 0        | 0       | 0       | 0        |
| Calditerrivibrio     | 2              | 74             | 0         | 0         | 0        | 0         | 0         | 1        | 0       | 0        | 0        | 1       | 0        | 0       | 0        | 0       | 0        | 0       | 0       | 0        |
| Caldivirga           | 1              | 13             | 0         | 0         | 0        | 0         | 0         | 0        | 0       | 0        | 0        | 0       | 0        | 0       | 0        | 0       | 0        | 0       | 0       | 0        |
| Calothrix            | 1              | 43             | 0         | 0         | 0        | 0         | 0         | 1        | 0       | 0        | 0        | 0       | 0        | 0       | 0        | 0       | 0        | 0       | 0       | 0        |
| Calyptogena          | 2              | 34             | 0         | 0         | 0        | 0         | 0         | 0        | 0       | 0        | 0        | 0       | 0        | 0       | 0        | 0       | 0        | 0       | 0       | 0        |
| Campylobacter        | 2              | 80             | 0         | 0         | 0        | 0         | 0         | 0        | 0       | 0        | 0        | 0       | 0        | 0       | 0        | 0       | 1        | 0       | 0       | 0        |
| Candidatus           | 2              | 290            | 0         | 1         | 0        | 1         | 0         | 1        | 0       | 1        | 0        | 1       | 0        | 0       | 0        | 1       | 1        | 0       | 1       | 0        |
| Capnocytophaga       | 1              | 50             | 0         | 0         | 0        | 0         | 0         | 0        | 0       | 0        | 0        | 0       | 0        | 0       | 0        | 0       | 0        | 0       | 0       | 0        |
| Carbophilus          | 1              | 2              | 0         | 0         | 0        | 0         | 0         | 0        | 0       | 0        | 0        | 0       | 0        | 0       | 0        | 0       | 1        | 0       | 0       | 0        |
| Carboxydibrachium    | 1              | 14             | 0         | 0         | 0        | 0         | 0         | 0        | 0       | 0        | 0        | 0       | 0        | 0       | 0        | 0       | 0        | 0       | 0       | 0        |
| Carboxydotherrmus    | 2              | 68             | 0         | 0         | 0        | 0         | 0         | 0        | 0       | 1        | 0        | 0       | 0        | 0       | 0        | 0       | 1        | 0       | 0       | 0        |
| Carica               | 1              | 2              | 0         | 0         | 0        | 0         | 0         | 0        | 0       | 0        | 0        | 0       | 0        | 0       | 0        | 0       | 0        | 0       | 0       | 0        |
| Carnobacterium       | 2              | 71             | 0         | 1         | 0        | 0         | 0         | 0        | 0       | 0        | 0        | 1       | 0        | 0       | 0        | 0       | 0        | 0       | 0       | 0        |
| Catenibacterium      | 1              | 2              | 0         | 0         | 0        | 0         | 0         | 0        | 0       | 0        | 0        | 0       | 0        | 0       | 0        | 0       | 0        | 0       | 0       | 0        |
| Catenovulum          | 1              | 2              | 0         | 0         | 0        | 0         | 0         | 0        | 0       | 0        | 0        | 0       | 0        | 0       | 0        | 0       | 0        | 0       | 0       | 0        |
| Catenulispora        | 3              | 159            | 0         | 0         | 0        | 0         | 0         | 0        | 0       | 0        | 1        | 1       | 0        | 0       | 0        | 0       | 1        | 0       | 0       | 0        |
| Caulobacter          | 3              | 168            | 0         | 1         | 0        | 0         | 0         | 0        | 1       | 0        | 1        | 1       | 0        | 0       | 0        | 0       | 0        | 0       | 0       | 0        |
| Cedecea              | 1              | 45             | 0         | 0         | 0        | 0         | 0         | 0        | 0       | 0        | 0        | 1       | 0        | 0       | 0        | 0       | 0        | 0       | 0       | 0        |
| Cellulomonas         | 2              | 96             | 0         | 1         | 0        | 0         | 0         | 0        | 0       | 1        | 0        | 1       | 0        | 0       | 0        | 0       | 0        | 0       | 0       | 0        |
| Cellulophaga         | 2              | 105            | 0         | 1         | 0        | 1         | 0         | 0        | 0       | 0        | 0        | 1       | 0        | 0       | 0        | 0       | 0        | 0       | 0       | 0        |
| Cellulosilyticum     | 1              | 14             | 0         | 0         | 0        | 0         | 0         | 0        | 0       | 0        | 0        | 0       | 0        | 0       | 0        | 0       | 0        | 0       | 0       | 0        |
| Cellvibrio           | 2              | 85             | 0         | 0         | 0        | 1         | 0         | 0        | 0       | 1        | 0        | 0       | 0        | 0       | 0        | 0       | 0        | 0       | 0       | 0        |
| Cenarchaeum          | 1              | 7              | 0         | 0         | 0        | 0         | 0         | 0        | 0       | 0        | 0        | 0       | 0        | 0       | 0        | 0       | 0        | 0       | 0       | 0        |
| Chamaesiphon         | 1              | 13             | 0         | 0         | 0        | 0         | 0         | 0        | 0       | 0        | 0        | 0       | 0        | 0       | 0        | 0       | 0        | 0       | 0       | 0        |
| Chelativorans        | 3              | 136            | 0         | 0         | 0        | 0         | 0         | 0        | 0       | 0        | 0        | 1       | 0        | 0       | 0        | 0       | 1        | 0       | 1       | 0        |

| Genus                  | Cluster Number | Protein Counts | 1.14.14.1 | 1.14.99.- | 1.17.3.2 | 1.17.99.1 | 1.17.99.2 | 1.18.6.1 | 1.2.1.- | 1.2.1.10 | 1.2.1.28 | 1.2.1.3 | 1.2.1.39 | 1.2.1.5 | 1.2.1.65 | 1.2.7.1 | 1.2.99.2 | 1.3.1.- | 1.3.1.2 | 1.3.1.25 |
|------------------------|----------------|----------------|-----------|-----------|----------|-----------|-----------|----------|---------|----------|----------|---------|----------|---------|----------|---------|----------|---------|---------|----------|
| Chelatococcus          | 1              | 2              | 0         | 0         | 0        | 0         | 0         | 0        | 0       | 0        | 0        | 0       | 0        | 0       | 0        | 0       | 0        | 0       | 0       | 0        |
| Chitinophaga           | 2              | 98             | 0         | 1         | 0        | 0         | 0         | 0        | 0       | 0        | 0        | 1       | 0        | 0       | 0        | 0       | 0        | 0       | 1       | 0        |
| Chlamydia              | 1              | 36             | 0         | 0         | 0        | 0         | 0         | 0        | 0       | 0        | 0        | 0       | 0        | 0       | 0        | 0       | 0        | 0       | 0       | 0        |
| Chlamydomonas          | 1              | 3              | 0         | 0         | 0        | 0         | 0         | 0        | 0       | 0        | 0        | 0       | 0        | 0       | 0        | 0       | 0        | 0       | 0       | 0        |
| Chlamydophila          | 1              | 31             | 0         | 0         | 0        | 0         | 0         | 0        | 0       | 0        | 0        | 0       | 0        | 0       | 0        | 0       | 0        | 0       | 0       | 0        |
| Chlorobaculum          | 2              | 61             | 0         | 1         | 0        | 0         | 0         | 1        | 0       | 0        | 0        | 1       | 0        | 0       | 0        | 0       | 0        | 0       | 0       | 0        |
| Chlorobium             | 2              | 89             | 0         | 1         | 0        | 0         | 0         | 1        | 0       | 0        | 0        | 1       | 0        | 0       | 0        | 0       | 0        | 0       | 0       | 0        |
| Chlorobium/Pelodictyon | 1              | 2              | 0         | 0         | 0        | 0         | 0         | 0        | 0       | 0        | 0        | 0       | 0        | 0       | 0        | 0       | 0        | 0       | 0       | 0        |
| Chloroflexus           | 2              | 105            | 0         | 1         | 0        | 0         | 0         | 0        | 0       | 1        | 0        | 1       | 0        | 0       | 0        | 0       | 1        | 0       | 0       | 0        |
| Chlorogloeopsis        | 1              | 9              | 0         | 0         | 0        | 0         | 0         | 0        | 0       | 0        | 0        | 0       | 0        | 0       | 0        | 0       | 0        | 0       | 0       | 0        |
| Chloroherpeton         | 2              | 59             | 0         | 0         | 0        | 0         | 0         | 1        | 0       | 0        | 0        | 0       | 0        | 0       | 0        | 0       | 0        | 0       | 0       | 0        |
| Chromobacterium        | 2              | 117            | 0         | 0         | 0        | 0         | 0         | 0        | 1       | 0        | 0        | 1       | 0        | 0       | 0        | 0       | 0        | 0       | 0       | 0        |
| Chromohalobacter       | 2              | 145            | 0         | 0         | 0        | 0         | 0         | 0        | 0       | 0        | 0        | 1       | 0        | 0       | 0        | 0       | 0        | 0       | 0       | 0        |
| Chroococciopsis        | 1              | 24             | 0         | 0         | 0        | 0         | 0         | 0        | 0       | 0        | 0        | 0       | 0        | 0       | 0        | 0       | 0        | 0       | 0       | 0        |
| Chryseobacterium       | 2              | 104            | 0         | 0         | 0        | 0         | 0         | 0        | 0       | 0        | 0        | 1       | 0        | 0       | 0        | 0       | 1        | 0       | 0       | 0        |
| Citricella             | 1              | 13             | 0         | 0         | 0        | 0         | 0         | 0        | 0       | 0        | 0        | 0       | 0        | 0       | 0        | 0       | 0        | 0       | 0       | 0        |
| Citrobacter            | 2              | 190            | 0         | 0         | 0        | 0         | 0         | 0        | 1       | 1        | 0        | 1       | 0        | 0       | 0        | 0       | 0        | 1       | 1       | 0        |
| Clavibacter            | 2              | 83             | 0         | 1         | 0        | 0         | 0         | 0        | 0       | 0        | 0        | 1       | 0        | 0       | 0        | 0       | 0        | 1       | 0       | 0        |
| Clonorchis             | 1              | 1              | 0         | 0         | 0        | 0         | 0         | 0        | 0       | 0        | 0        | 0       | 0        | 0       | 0        | 0       | 0        | 0       | 0       | 0        |
| Clostridiales          | 2              | 77             | 0         | 0         | 0        | 0         | 0         | 1        | 0       | 1        | 0        | 1       | 0        | 0       | 0        | 1       | 0        | 0       | 1       | 0        |
| Clostridium            | 2              | 191            | 0         | 1         | 0        | 0         | 0         | 1        | 0       | 1        | 0        | 1       | 0        | 0       | 0        | 1       | 1        | 0       | 1       | 0        |
| Cohnella               | 1              | 2              | 0         | 0         | 0        | 0         | 0         | 0        | 0       | 0        | 0        | 0       | 0        | 0       | 0        | 0       | 0        | 0       | 0       | 0        |
| Coleofasciculus        | 1              | 4              | 0         | 0         | 0        | 0         | 0         | 0        | 0       | 0        | 0        | 0       | 0        | 0       | 0        | 0       | 0        | 0       | 0       | 0        |
| Collimonas             | 1              | 35             | 0         | 0         | 0        | 0         | 0         | 0        | 0       | 0        | 0        | 0       | 0        | 0       | 0        | 0       | 0        | 0       | 0       | 0        |
| Colwellia              | 2              | 130            | 0         | 1         | 0        | 1         | 0         | 0        | 0       | 0        | 0        | 1       | 0        | 0       | 0        | 0       | 0        | 0       | 0       | 0        |
| Comamonas              | 2              | 196            | 0         | 0         | 0        | 1         | 0         | 0        | 0       | 1        | 0        | 1       | 0        | 0       | 0        | 0       | 1        | 1       | 1       | 0        |
| Conexibacter           | 3              | 117            | 0         | 1         | 0        | 0         | 0         | 0        | 0       | 1        | 0        | 1       | 0        | 1       | 0        | 0       | 1        | 0       | 0       | 0        |
| Coprobacillus          | 1              | 2              | 0         | 0         | 0        | 0         | 0         | 0        | 0       | 0        | 0        | 0       | 0        | 0       | 0        | 0       | 0        | 0       | 0       | 0        |
| Coprococcus            | 2              | 76             | 0         | 0         | 0        | 0         | 0         | 0        | 0       | 0        | 0        | 1       | 0        | 0       | 0        | 1       | 0        | 0       | 0       | 0        |
| Coprothermobacter      | 2              | 45             | 0         | 0         | 0        | 0         | 0         | 0        | 0       | 0        | 0        | 0       | 0        | 0       | 0        | 1       | 0        | 0       | 0       | 0        |
| Coralimargarita        | 2              | 68             | 0         | 0         | 0        | 0         | 0         | 1        | 0       | 0        | 0        | 1       | 0        | 0       | 0        | 0       | 0        | 0       | 0       | 0        |
| Corallococcus          | 1              | 29             | 0         | 0         | 0        | 0         | 0         | 0        | 0       | 0        | 0        | 0       | 0        | 0       | 0        | 0       | 0        | 0       | 0       | 0        |
| Coriobacterium         | 2              | 36             | 0         | 0         | 0        | 0         | 0         | 0        | 0       | 0        | 0        | 0       | 0        | 0       | 0        | 0       | 0        | 0       | 0       | 0        |
| Corynebacterineae      | 1              | 5              | 0         | 0         | 0        | 0         | 0         | 0        | 0       | 0        | 0        | 0       | 0        | 0       | 0        | 0       | 0        | 0       | 0       | 0        |
| Corynebacterium        | 2              | 175            | 0         | 1         | 0        | 0         | 0         | 0        | 0       | 0        | 0        | 1       | 0        | 0       | 0        | 0       | 0        | 0       | 0       | 1        |
| Coxiella               | 2              | 54             | 0         | 0         | 0        | 0         | 0         | 0        | 0       | 0        | 0        | 0       | 0        | 0       | 0        | 0       | 0        | 0       | 0       | 0        |
| Crinalium              | 1              | 21             | 0         | 0         | 0        | 0         | 0         | 0        | 0       | 0        | 0        | 0       | 0        | 0       | 0        | 0       | 0        | 0       | 0       | 0        |
| Croceibacter           | 2              | 80             | 0         | 1         | 0        | 0         | 0         | 0        | 0       | 0        | 0        | 1       | 0        | 0       | 0        | 0       | 0        | 0       | 0       | 0        |
| Crocospaera            | 1              | 6              | 0         | 0         | 0        | 0         | 0         | 0        | 0       | 0        | 0        | 0       | 0        | 0       | 0        | 0       | 0        | 0       | 0       | 0        |
| Cronobacter            | 2              | 120            | 0         | 1         | 0        | 0         | 0         | 0        | 1       | 1        | 0        | 1       | 0        | 0       | 0        | 0       | 0        | 0       | 0       | 0        |
| Cryptobacterium        | 2              | 39             | 0         | 0         | 0        | 0         | 0         | 0        | 0       | 0        | 0        | 0       | 0        | 0       | 0        | 1       | 0        | 0       | 0       | 0        |
| Cucumis                | 1              | 9              | 0         | 0         | 0        | 0         | 0         | 0        | 0       | 0        | 0        | 0       | 0        | 0       | 0        | 0       | 0        | 0       | 0       | 0        |
| Cupriavidus            | 3              | 317            | 0         | 0         | 0        | 0         | 0         | 1        | 0       | 1        | 1        | 1       | 0        | 0       | 0        | 0       | 1        | 0       | 0       | 1        |
| Curtobacterium         | 1              | 5              | 0         | 1         | 0        | 0         | 0         | 0        | 0       | 0        | 0        | 0       | 0        | 0       | 0        | 0       | 0        | 0       | 0       | 0        |
| Curvibacter            | 1              | 27             | 0         | 0         | 0        | 0         | 0         | 1        | 0       | 0        | 0        | 1       | 0        | 0       | 0        | 0       | 0        | 0       | 0       | 0        |
| Cyanobacterium         | 1              | 9              | 0         | 0         | 0        | 0         | 0         | 0        | 0       | 0        | 0        | 0       | 0        | 0       | 0        | 0       | 0        | 0       | 0       | 0        |
| Cyanobium              | 1              | 10             | 0         | 0         | 0        | 0         | 0         | 0        | 0       | 0        | 0        | 0       | 0        | 0       | 0        | 0       | 0        | 0       | 0       | 0        |
| Cyanothece             | 1              | 34             | 0         | 0         | 0        | 0         | 0         | 0        | 0       | 0        | 0        | 0       | 0        | 0       | 0        | 0       | 0        | 0       | 0       | 0        |
| Cyclobacterium         | 1              | 19             | 0         | 0         | 0        | 0         | 0         | 0        | 0       | 0        | 0        | 0       | 0        | 0       | 0        | 0       | 0        | 0       | 0       | 0        |
| Cycloclasticus         | 1              | 21             | 0         | 0         | 0        | 0         | 0         | 0        | 0       | 0        | 0        | 0       | 0        | 0       | 0        | 0       | 0        | 0       | 0       | 0        |
| Cylindrospermopsis     | 1              | 4              | 0         | 0         | 0        | 0         | 0         | 0        | 0       | 0        | 0        | 0       | 0        | 0       | 0        | 0       | 0        | 0       | 0       | 0        |
| Cylindrospermum        | 1              | 30             | 0         | 0         | 0        | 0         | 0         | 1        | 0       | 0        | 0        | 0       | 0        | 0       | 0        | 0       | 0        | 0       | 0       | 0        |

| Genus              | Cluster Number | Protein Counts | 1.14.14.1 | 1.14.99.- | 1.17.3.2 | 1.17.99.1 | 1.17.99.2 | 1.18.6.1 | 1.2.1.- | 1.2.1.10 | 1.2.1.28 | 1.2.1.3 | 1.2.1.39 | 1.2.1.5 | 1.2.1.65 | 1.2.7.1 | 1.2.99.2 | 1.3.1.- | 1.3.1.2 | 1.3.1.25 |
|--------------------|----------------|----------------|-----------|-----------|----------|-----------|-----------|----------|---------|----------|----------|---------|----------|---------|----------|---------|----------|---------|---------|----------|
| Cytophaga          | 2              | 69             | 0         | 0         | 0        | 0         | 0         | 0        | 0       | 0        | 0        | 0       | 0        | 0       | 0        | 0       | 0        | 0       | 0       | 0        |
| Dactylococcopsis   | 1              | 8              | 0         | 0         | 0        | 0         | 0         | 0        | 0       | 0        | 0        | 0       | 0        | 0       | 0        | 0       | 0        | 0       | 0       | 0        |
| Dechloromonas      | 1              | 40             | 0         | 0         | 0        | 0         | 0         | 0        | 0       | 0        | 0        | 0       | 0        | 0       | 0        | 0       | 0        | 0       | 0       | 0        |
| Dechlorosoma       | 1              | 19             | 0         | 0         | 0        | 0         | 0         | 0        | 0       | 0        | 0        | 0       | 0        | 0       | 0        | 0       | 0        | 0       | 0       | 0        |
| Deferribacter      | 2              | 73             | 0         | 0         | 0        | 0         | 0         | 0        | 0       | 0        | 0        | 1       | 0        | 0       | 0        | 0       | 0        | 0       | 0       | 0        |
| Dehalobacter       | 1              | 9              | 0         | 0         | 0        | 0         | 0         | 0        | 0       | 0        | 0        | 0       | 0        | 0       | 0        | 0       | 0        | 0       | 0       | 0        |
| Dehalococcoides    | 2              | 41             | 0         | 0         | 0        | 0         | 0         | 1        | 0       | 0        | 0        | 0       | 0        | 0       | 0        | 1       | 0        | 0       | 0       | 0        |
| Dehalogenimonas    | 1              | 37             | 0         | 0         | 0        | 0         | 0         | 0        | 0       | 0        | 0        | 0       | 0        | 0       | 0        | 1       | 1        | 0       | 0       | 0        |
| Deinococcus        | 2              | 140            | 0         | 1         | 0        | 0         | 0         | 0        | 1       | 0        | 0        | 1       | 0        | 0       | 0        | 0       | 1        | 0       | 0       | 0        |
| Delftia            | 3              | 177            | 0         | 0         | 0        | 0         | 0         | 1        | 0       | 1        | 0        | 1       | 0        | 0       | 0        | 0       | 1        | 0       | 1       | 0        |
| Denitrovibrio      | 2              | 67             | 0         | 0         | 0        | 0         | 0         | 1        | 0       | 0        | 0        | 1       | 0        | 0       | 0        | 0       | 0        | 0       | 0       | 0        |
| Desulfarculus      | 2              | 92             | 0         | 0         | 0        | 0         | 0         | 1        | 0       | 0        | 0        | 1       | 0        | 0       | 0        | 1       | 1        | 0       | 0       | 0        |
| Desulfatibacillum  | 3              | 84             | 0         | 0         | 0        | 0         | 0         | 1        | 0       | 0        | 0        | 1       | 0        | 0       | 0        | 0       | 1        | 0       | 0       | 0        |
| Desulfitobacterium | 2              | 102            | 0         | 0         | 0        | 0         | 0         | 1        | 0       | 1        | 0        | 1       | 0        | 0       | 0        | 0       | 1        | 0       | 0       | 0        |
| Desulfobacca       | 2              | 65             | 0         | 0         | 0        | 0         | 0         | 1        | 0       | 0        | 0        | 0       | 0        | 0       | 0        | 1       | 1        | 0       | 0       | 0        |
| Desulfobacterium   | 2              | 113            | 0         | 0         | 0        | 0         | 0         | 1        | 0       | 1        | 0        | 1       | 0        | 0       | 0        | 0       | 1        | 0       | 0       | 0        |
| Desulfobacula      | 1              | 21             | 0         | 0         | 0        | 0         | 0         | 0        | 0       | 0        | 0        | 0       | 0        | 0       | 0        | 0       | 0        | 0       | 0       | 0        |
| Desulfobulbus      | 2              | 88             | 0         | 0         | 0        | 0         | 0         | 1        | 0       | 0        | 0        | 0       | 0        | 0       | 0        | 0       | 0        | 0       | 0       | 1        |
| Desulfocapsa       | 1              | 9              | 0         | 0         | 0        | 0         | 0         | 0        | 0       | 0        | 0        | 0       | 0        | 0       | 0        | 0       | 0        | 0       | 0       | 0        |
| Desulfococcus      | 2              | 80             | 0         | 0         | 0        | 0         | 1         | 0        | 0       | 0        | 0        | 1       | 0        | 0       | 0        | 1       | 1        | 0       | 0       | 0        |
| Desulfohalobium    | 2              | 52             | 0         | 0         | 0        | 0         | 0         | 0        | 0       | 0        | 0        | 0       | 0        | 0       | 0        | 0       | 1        | 0       | 0       | 0        |
| Desulfomicrobium   | 2              | 65             | 0         | 0         | 0        | 0         | 0         | 1        | 0       | 1        | 0        | 0       | 0        | 0       | 0        | 0       | 1        | 0       | 0       | 0        |
| Desulfomonile      | 1              | 25             | 0         | 0         | 0        | 0         | 0         | 0        | 0       | 0        | 0        | 0       | 0        | 0       | 0        | 0       | 0        | 0       | 0       | 0        |
| Desulforhabdus     | 1              | 2              | 0         | 0         | 0        | 0         | 0         | 0        | 0       | 0        | 0        | 0       | 0        | 0       | 0        | 0       | 0        | 0       | 0       | 0        |
| Desulfosporosinus  | 1              | 30             | 0         | 0         | 0        | 0         | 0         | 0        | 0       | 0        | 0        | 0       | 0        | 0       | 0        | 0       | 0        | 0       | 0       | 0        |
| Desulfotalea       | 2              | 66             | 0         | 0         | 0        | 0         | 0         | 0        | 0       | 1        | 0        | 0       | 0        | 0       | 0        | 1       | 0        | 0       | 0       | 0        |
| Desulfotomaculum   | 2              | 98             | 0         | 0         | 0        | 0         | 0         | 1        | 0       | 0        | 0        | 1       | 0        | 0       | 0        | 0       | 1        | 0       | 0       | 0        |
| Desulfovibrio      | 2              | 144            | 0         | 0         | 0        | 0         | 0         | 1        | 0       | 1        | 0        | 1       | 0        | 0       | 0        | 0       | 1        | 0       | 0       | 0        |
| Desulfurispirillum | 2              | 78             | 0         | 0         | 0        | 0         | 0         | 1        | 0       | 0        | 0        | 0       | 0        | 0       | 0        | 1       | 1        | 0       | 0       | 0        |
| Desulfurivibrio    | 2              | 71             | 0         | 0         | 0        | 0         | 0         | 1        | 0       | 0        | 0        | 0       | 0        | 0       | 0        | 0       | 1        | 0       | 0       | 0        |
| Desulfurobacterium | 2              | 53             | 0         | 0         | 0        | 0         | 0         | 0        | 0       | 0        | 0        | 1       | 0        | 0       | 0        | 1       | 1        | 0       | 0       | 0        |
| Desulfurococcus    | 1              | 11             | 0         | 0         | 0        | 0         | 0         | 0        | 0       | 0        | 0        | 0       | 0        | 0       | 0        | 0       | 0        | 0       | 0       | 0        |
| Diaphorobacter     | 1              | 16             | 0         | 0         | 0        | 0         | 0         | 0        | 0       | 1        | 0        | 0       | 0        | 0       | 0        | 0       | 0        | 0       | 0       | 0        |
| Dichelobacter      | 2              | 45             | 0         | 0         | 0        | 0         | 0         | 0        | 0       | 0        | 0        | 0       | 0        | 0       | 0        | 0       | 0        | 0       | 0       | 0        |
| Dickeya            | 2              | 155            | 0         | 0         | 0        | 0         | 0         | 1        | 0       | 1        | 0        | 1       | 0        | 0       | 0        | 0       | 0        | 0       | 1       | 0        |
| Dictyoglomus       | 2              | 62             | 0         | 0         | 0        | 0         | 0         | 0        | 0       | 0        | 0        | 1       | 0        | 0       | 0        | 1       | 0        | 0       | 0       | 0        |
| Dinoroseobacter    | 3              | 148            | 0         | 1         | 0        | 0         | 0         | 0        | 0       | 0        | 0        | 1       | 0        | 0       | 0        | 0       | 1        | 0       | 1       | 0        |
| Dokdonia           | 1              | 3              | 0         | 0         | 0        | 0         | 0         | 0        | 0       | 0        | 0        | 0       | 0        | 0       | 0        | 0       | 0        | 0       | 0       | 0        |
| Dorea              | 1              | 7              | 0         | 0         | 0        | 0         | 0         | 0        | 0       | 0        | 0        | 0       | 0        | 0       | 0        | 0       | 0        | 0       | 0       | 0        |
| Dyadobacter        | 2              | 83             | 0         | 1         | 0        | 0         | 0         | 0        | 0       | 0        | 0        | 1       | 0        | 0       | 0        | 0       | 0        | 1       | 0       | 0        |
| Echinicola         | 1              | 20             | 0         | 0         | 0        | 0         | 0         | 0        | 0       | 0        | 0        | 0       | 0        | 0       | 0        | 0       | 0        | 0       | 0       | 0        |
| Edwardsiella       | 2              | 126            | 0         | 0         | 0        | 0         | 0         | 0        | 0       | 1        | 0        | 1       | 0        | 0       | 0        | 0       | 0        | 0       | 0       | 0        |
| Eggerthella        | 1              | 51             | 0         | 0         | 0        | 0         | 0         | 0        | 0       | 0        | 0        | 1       | 0        | 0       | 0        | 1       | 0        | 0       | 0       | 0        |
| Ehrlichia          | 2              | 37             | 0         | 0         | 0        | 0         | 0         | 0        | 0       | 0        | 0        | 0       | 0        | 0       | 0        | 0       | 0        | 0       | 0       | 0        |
| Eikenella          | 1              | 4              | 0         | 0         | 0        | 0         | 0         | 0        | 0       | 0        | 0        | 0       | 0        | 0       | 0        | 0       | 0        | 0       | 0       | 0        |
| Elusimicrobium     | 2              | 44             | 0         | 0         | 0        | 0         | 0         | 0        | 0       | 1        | 0        | 0       | 0        | 0       | 0        | 0       | 0        | 0       | 0       | 0        |
| Emticicia          | 1              | 21             | 0         | 0         | 0        | 0         | 0         | 0        | 0       | 0        | 0        | 0       | 0        | 0       | 0        | 0       | 0        | 0       | 0       | 0        |
| Enhydrobacter      | 1              | 1              | 0         | 0         | 0        | 0         | 0         | 0        | 0       | 0        | 0        | 0       | 0        | 0       | 0        | 0       | 0        | 0       | 0       | 0        |
| Ensifer            | 1              | 2              | 0         | 0         | 0        | 0         | 0         | 0        | 0       | 0        | 0        | 0       | 0        | 0       | 0        | 0       | 0        | 0       | 0       | 0        |
| Enterobacter       | 2              | 202            | 0         | 0         | 0        | 0         | 0         | 1        | 1       | 1        | 0        | 1       | 1        | 0       | 0        | 0       | 0        | 0       | 0       | 1        |
| Enterobacteriaceae | 2              | 211            | 0         | 0         | 0        | 0         | 0         | 0        | 1       | 1        | 0        | 1       | 1        | 0       | 0        | 0       | 0        | 1       | 1       | 1        |
| Enterococcus       | 1              | 187            | 0         | 1         | 0        | 0         | 0         | 0        | 1       | 1        | 0        | 1       | 0        | 0       | 0        | 0       | 0        | 0       | 0       | 1        |

| Genus               | Cluster Number | Protein Counts | 1.14.14.1 | 1.14.99.- | 1.17.3.2 | 1.17.99.1 | 1.17.99.2 | 1.18.6.1 | 1.2.1.- | 1.2.1.10 | 1.2.1.28 | 1.2.1.3 | 1.2.1.39 | 1.2.1.5 | 1.2.1.65 | 1.2.7.1 | 1.2.99.2 | 1.3.1.- | 1.3.1.2 | 1.3.1.25 |
|---------------------|----------------|----------------|-----------|-----------|----------|-----------|-----------|----------|---------|----------|----------|---------|----------|---------|----------|---------|----------|---------|---------|----------|
| Enterovibrio        | 1              | 15             | 0         | 0         | 0        | 0         | 0         | 0        | 0       | 1        | 0        | 0       | 0        | 0       | 0        | 0       | 0        | 0       | 0       | 0        |
| Erwinia             | 2              | 151            | 0         | 0         | 0        | 0         | 0         | 0        | 0       | 1        | 0        | 1       | 0        | 0       | 0        | 0       | 0        | 0       | 0       | 0        |
| Erysipelothrix      | 1              | 9              | 0         | 0         | 0        | 0         | 0         | 0        | 0       | 0        | 0        | 0       | 0        | 0       | 0        | 0       | 0        | 0       | 0       | 0        |
| Erysipelotrichaceae | 1              | 4              | 0         | 0         | 0        | 0         | 0         | 0        | 0       | 0        | 0        | 0       | 0        | 0       | 0        | 0       | 0        | 0       | 0       | 0        |
| Erythrobacter       | 2              | 80             | 1         | 1         | 0        | 0         | 0         | 0        | 0       | 0        | 0        | 1       | 0        | 0       | 0        | 0       | 0        | 0       | 0       | 0        |
| Escherichia         | 2              | 242            | 0         | 0         | 0        | 0         | 0         | 0        | 1       | 1        | 0        | 1       | 1        | 0       | 0        | 0       | 0        | 1       | 1       | 1        |
| Ethanoligenens      | 2              | 69             | 0         | 0         | 0        | 0         | 0         | 1        | 0       | 0        | 0        | 0       | 0        | 0       | 0        | 0       | 0        | 0       | 1       | 0        |
| Eubacteriaceae      | 1              | 2              | 0         | 0         | 0        | 0         | 0         | 0        | 0       | 0        | 0        | 0       | 0        | 0       | 0        | 0       | 0        | 0       | 0       | 0        |
| Eubacterium         | 2              | 103            | 0         | 1         | 0        | 0         | 0         | 0        | 0       | 1        | 0        | 1       | 0        | 0       | 0        | 1       | 1        | 0       | 1       | 0        |
| Eudoraea            | 1              | 4              | 0         | 0         | 0        | 0         | 0         | 0        | 0       | 0        | 0        | 0       | 0        | 0       | 0        | 0       | 0        | 0       | 0       | 0        |
| Euryarchaeota       | 1              | 1              | 0         | 0         | 0        | 0         | 0         | 0        | 0       | 0        | 0        | 0       | 0        | 0       | 0        | 0       | 0        | 0       | 0       | 0        |
| Exiguobacterium     | 2              | 93             | 0         | 1         | 0        | 0         | 0         | 0        | 0       | 1        | 0        | 1       | 1        | 0       | 0        | 0       | 0        | 0       | 0       | 0        |
| Faecalibacterium    | 1              | 12             | 0         | 0         | 0        | 0         | 0         | 0        | 0       | 0        | 0        | 0       | 0        | 0       | 0        | 0       | 0        | 0       | 0       | 0        |
| Ferrimonas          | 2              | 115            | 0         | 0         | 0        | 0         | 0         | 0        | 0       | 0        | 0        | 1       | 0        | 0       | 0        | 0       | 0        | 0       | 0       | 0        |
| Ferroglobus         | 1              | 14             | 0         | 0         | 0        | 0         | 0         | 0        | 0       | 0        | 0        | 0       | 0        | 0       | 0        | 0       | 0        | 0       | 0       | 0        |
| Ferroplasma         | 1              | 11             | 0         | 0         | 0        | 0         | 0         | 0        | 0       | 0        | 0        | 0       | 0        | 0       | 0        | 0       | 0        | 0       | 0       | 0        |
| Fervidicoccus       | 1              | 7              | 0         | 0         | 0        | 0         | 0         | 0        | 0       | 0        | 0        | 0       | 0        | 0       | 0        | 0       | 0        | 0       | 0       | 0        |
| Fervidobacterium    | 2              | 54             | 0         | 0         | 0        | 0         | 0         | 0        | 0       | 0        | 0        | 0       | 0        | 0       | 0        | 1       | 0        | 0       | 0       | 0        |
| Fibrella            | 1              | 17             | 0         | 0         | 0        | 0         | 0         | 0        | 0       | 0        | 0        | 0       | 0        | 0       | 0        | 0       | 0        | 0       | 0       | 0        |
| Fibrobacter         | 2              | 52             | 0         | 0         | 0        | 0         | 0         | 1        | 0       | 0        | 0        | 1       | 0        | 0       | 0        | 0       | 0        | 0       | 0       | 0        |
| Filifactor          | 1              | 9              | 0         | 0         | 0        | 0         | 0         | 0        | 0       | 0        | 0        | 0       | 0        | 0       | 0        | 0       | 0        | 0       | 0       | 0        |
| Finegoldia          | 2              | 55             | 0         | 0         | 0        | 0         | 0         | 0        | 0       | 1        | 0        | 1       | 0        | 0       | 0        | 1       | 1        | 0       | 0       | 0        |
| Firmicutes          | 1              | 15             | 0         | 0         | 0        | 0         | 0         | 0        | 0       | 0        | 0        | 0       | 0        | 0       | 0        | 0       | 0        | 0       | 0       | 0        |
| Fischerella         | 1              | 15             | 0         | 0         | 0        | 0         | 0         | 1        | 0       | 0        | 0        | 0       | 0        | 0       | 0        | 0       | 0        | 0       | 0       | 0        |
| Flavobacteria       | 1              | 7              | 0         | 0         | 0        | 0         | 0         | 0        | 0       | 0        | 0        | 0       | 0        | 0       | 0        | 0       | 0        | 0       | 0       | 0        |
| Flavobacteriaceae   | 2              | 69             | 0         | 1         | 0        | 0         | 0         | 0        | 0       | 0        | 0        | 1       | 0        | 0       | 0        | 0       | 0        | 0       | 0       | 0        |
| Flavobacteriales    | 1              | 3              | 0         | 0         | 0        | 0         | 0         | 0        | 0       | 0        | 0        | 0       | 0        | 0       | 0        | 0       | 0        | 0       | 0       | 0        |
| Flavobacterium      | 2              | 103            | 0         | 1         | 0        | 0         | 0         | 0        | 0       | 0        | 0        | 1       | 0        | 0       | 0        | 0       | 0        | 0       | 0       | 0        |
| Flexibacter         | 1              | 17             | 0         | 0         | 0        | 0         | 0         | 0        | 0       | 0        | 0        | 0       | 0        | 0       | 0        | 0       | 0        | 0       | 0       | 0        |
| Flexistipes         | 1              | 11             | 0         | 0         | 0        | 0         | 0         | 0        | 0       | 0        | 0        | 0       | 0        | 0       | 0        | 0       | 0        | 0       | 0       | 0        |
| Fluoribacter        | 1              | 6              | 0         | 0         | 0        | 0         | 0         | 0        | 0       | 0        | 0        | 0       | 0        | 0       | 0        | 0       | 0        | 0       | 0       | 0        |
| Fluviicola          | 2              | 69             | 0         | 1         | 0        | 0         | 0         | 0        | 0       | 0        | 0        | 1       | 0        | 0       | 0        | 0       | 0        | 0       | 0       | 0        |
| Formosa             | 1              | 2              | 0         | 0         | 0        | 0         | 0         | 0        | 0       | 0        | 0        | 0       | 0        | 0       | 0        | 0       | 0        | 0       | 0       | 0        |
| Francisella         | 2              | 88             | 0         | 0         | 0        | 0         | 0         | 0        | 0       | 0        | 0        | 0       | 0        | 0       | 0        | 0       | 0        | 0       | 0       | 0        |
| Frankia             | 3              | 202            | 0         | 1         | 0        | 0         | 0         | 1        | 0       | 1        | 0        | 1       | 0        | 0       | 0        | 1       | 1        | 1       | 0       | 0        |
| Frateuria           | 1              | 25             | 0         | 0         | 0        | 0         | 0         | 0        | 0       | 0        | 0        | 0       | 0        | 0       | 0        | 0       | 0        | 0       | 0       | 0        |
| Fructobacillus      | 1              | 2              | 0         | 0         | 0        | 0         | 0         | 0        | 0       | 0        | 0        | 0       | 0        | 0       | 0        | 0       | 0        | 0       | 0       | 0        |
| Fulvimarina         | 1              | 2              | 0         | 0         | 0        | 0         | 0         | 0        | 0       | 0        | 0        | 0       | 0        | 0       | 0        | 0       | 0        | 0       | 0       | 0        |
| Fusobacterium       | 1              | 48             | 0         | 0         | 0        | 0         | 0         | 0        | 0       | 0        | 0        | 0       | 0        | 0       | 0        | 0       | 0        | 0       | 0       | 0        |
| Gallibacterium      | 2              | 87             | 0         | 0         | 0        | 0         | 0         | 0        | 0       | 0        | 0        | 0       | 0        | 0       | 0        | 0       | 0        | 0       | 0       | 0        |
| Gallionella         | 2              | 67             | 0         | 0         | 0        | 0         | 0         | 0        | 0       | 0        | 0        | 0       | 0        | 0       | 0        | 1       | 0        | 0       | 0       | 0        |
| Gammaproteobacteria | 1              | 9              | 0         | 0         | 0        | 0         | 0         | 0        | 0       | 0        | 0        | 0       | 0        | 0       | 0        | 0       | 0        | 0       | 0       | 0        |
| Gardnerella         | 1              | 31             | 0         | 0         | 0        | 0         | 0         | 0        | 0       | 0        | 0        | 0       | 0        | 0       | 0        | 0       | 0        | 0       | 0       | 0        |
| Geitlerinema        | 1              | 9              | 0         | 0         | 0        | 0         | 0         | 0        | 0       | 0        | 0        | 0       | 0        | 0       | 0        | 0       | 0        | 0       | 0       | 0        |
| Gemmatimonas        | 2              | 93             | 0         | 1         | 0        | 0         | 0         | 0        | 0       | 0        | 0        | 1       | 0        | 0       | 0        | 0       | 0        | 0       | 0       | 0        |
| Geobacillus         | 2              | 168            | 0         | 1         | 0        | 0         | 0         | 0        | 0       | 1        | 0        | 1       | 1        | 0       | 0        | 1       | 1        | 0       | 1       | 0        |
| Geobacter           | 2              | 150            | 0         | 0         | 0        | 1         | 0         | 1        | 0       | 1        | 0        | 1       | 0        | 0       | 0        | 0       | 1        | 0       | 0       | 0        |
| Geodermatophilus    | 2              | 136            | 0         | 1         | 0        | 0         | 0         | 0        | 0       | 0        | 1        | 1       | 0        | 0       | 0        | 0       | 1        | 0       | 0       | 1        |
| Geopsychrobacter    | 1              | 2              | 0         | 0         | 0        | 0         | 0         | 0        | 0       | 0        | 0        | 0       | 0        | 0       | 0        | 0       | 0        | 0       | 0       | 0        |
| Gillisia            | 1              | 11             | 0         | 0         | 0        | 0         | 0         | 0        | 0       | 0        | 0        | 0       | 0        | 0       | 0        | 0       | 0        | 0       | 0       | 0        |
| Gilvimarinus        | 1              | 4              | 0         | 0         | 0        | 0         | 0         | 0        | 0       | 0        | 0        | 0       | 0        | 0       | 0        | 0       | 0        | 0       | 0       | 0        |
| Glaciecola          | 2              | 117            | 0         | 0         | 0        | 0         | 0         | 0        | 0       | 0        | 0        | 1       | 0        | 0       | 0        | 0       | 0        | 0       | 0       | 0        |



| Genus             | Cluster Number | Protein Counts | 1.14.14.1 | 1.14.99.- | 1.17.3.2 | 1.17.99.1 | 1.17.99.2 | 1.18.6.1 | 1.2.1.- | 1.2.1.10 | 1.2.1.28 | 1.2.1.3 | 1.2.1.39 | 1.2.1.5 | 1.2.1.65 | 1.2.7.1 | 1.2.99.2 | 1.3.1.- | 1.3.1.2 | 1.3.1.25 |
|-------------------|----------------|----------------|-----------|-----------|----------|-----------|-----------|----------|---------|----------|----------|---------|----------|---------|----------|---------|----------|---------|---------|----------|
| Gloeobacter       | 2              | 67             | 0         | 1         | 0        | 0         | 0         | 0        | 0       | 0        | 0        | 0       | 0        | 0       | 0        | 0       | 0        | 0       | 0       | 0        |
| Gloeocapsa        | 1              | 20             | 0         | 0         | 0        | 0         | 0         | 0        | 0       | 0        | 0        | 0       | 0        | 0       | 0        | 0       | 0        | 0       | 0       | 0        |
| Gloeotheca        | 1              | 1              | 0         | 0         | 0        | 0         | 0         | 0        | 0       | 0        | 0        | 0       | 0        | 0       | 0        | 0       | 0        | 0       | 0       | 0        |
| Gluconacetobacter | 2              | 96             | 0         | 1         | 0        | 0         | 0         | 1        | 0       | 0        | 0        | 1       | 1        | 0       | 0        | 0       | 0        | 0       | 1       | 0        |
| Gluconobacter     | 2              | 76             | 0         | 0         | 0        | 0         | 0         | 0        | 0       | 0        | 0        | 1       | 0        | 0       | 0        | 0       | 0        | 0       | 0       | 0        |
| Gordonia          | 1              | 158            | 0         | 1         | 0        | 0         | 0         | 0        | 0       | 1        | 0        | 1       | 0        | 0       | 0        | 0       | 1        | 0       | 0       | 1        |
| Gordonibacter     | 1              | 32             | 0         | 0         | 0        | 0         | 0         | 0        | 0       | 0        | 0        | 1       | 0        | 0       | 0        | 1       | 0        | 0       | 0       | 0        |
| Gramella          | 2              | 104            | 0         | 1         | 0        | 0         | 0         | 0        | 0       | 0        | 0        | 1       | 0        | 0       | 0        | 0       | 0        | 0       | 0       | 0        |
| Granulibacter     | 2              | 90             | 0         | 1         | 0        | 0         | 0         | 0        | 0       | 0        | 0        | 1       | 0        | 0       | 0        | 0       | 0        | 1       | 0       | 0        |
| Granulicella      | 2              | 98             | 0         | 0         | 0        | 0         | 0         | 0        | 0       | 0        | 0        | 1       | 0        | 0       | 0        | 0       | 0        | 1       | 1       | 0        |
| Grimontia         | 1              | 9              | 0         | 0         | 0        | 0         | 0         | 0        | 0       | 1        | 0        | 0       | 0        | 0       | 0        | 0       | 0        | 0       | 0       | 0        |
| Haemophilus       | 2              | 117            | 0         | 0         | 0        | 0         | 0         | 0        | 0       | 0        | 0        | 0       | 0        | 0       | 0        | 0       | 0        | 0       | 0       | 0        |
| Hafnia            | 1              | 29             | 0         | 0         | 0        | 0         | 0         | 0        | 0       | 0        | 0        | 0       | 0        | 0       | 0        | 0       | 0        | 0       | 0       | 0        |
| Hahella           | 3              | 130            | 0         | 0         | 0        | 0         | 0         | 0        | 0       | 0        | 0        | 1       | 0        | 0       | 0        | 0       | 0        | 0       | 0       | 0        |
| Halalkalicoccus   | 1              | 18             | 0         | 0         | 0        | 0         | 0         | 0        | 0       | 0        | 0        | 0       | 0        | 0       | 0        | 0       | 0        | 0       | 0       | 0        |
| Halanaerobium     | 2              | 89             | 0         | 0         | 0        | 0         | 0         | 0        | 0       | 0        | 0        | 0       | 0        | 0       | 0        | 1       | 0        | 0       | 1       | 0        |
| Haliangium        | 2              | 108            | 0         | 1         | 0        | 0         | 0         | 0        | 0       | 0        | 0        | 1       | 0        | 0       | 0        | 0       | 1        | 1       | 0       | 0        |
| Haliscomenobacter | 2              | 107            | 0         | 1         | 0        | 0         | 0         | 0        | 0       | 0        | 0        | 1       | 0        | 0       | 0        | 0       | 1        | 0       | 0       | 0        |
| Haloarcula        | 1              | 22             | 0         | 0         | 0        | 0         | 0         | 0        | 0       | 0        | 0        | 0       | 0        | 0       | 0        | 0       | 0        | 0       | 0       | 0        |
| Halobacillus      | 1              | 19             | 0         | 0         | 0        | 0         | 0         | 0        | 0       | 0        | 0        | 0       | 0        | 0       | 0        | 0       | 0        | 0       | 0       | 0        |
| Halobacteriaceae  | 1              | 1              | 0         | 0         | 0        | 0         | 0         | 0        | 0       | 0        | 0        | 0       | 0        | 0       | 0        | 0       | 0        | 0       | 0       | 0        |
| Halobacterium     | 1              | 10             | 0         | 0         | 0        | 0         | 0         | 0        | 0       | 0        | 0        | 0       | 0        | 0       | 0        | 0       | 0        | 0       | 0       | 0        |
| Halobacteroides   | 1              | 14             | 0         | 0         | 0        | 0         | 0         | 0        | 0       | 0        | 0        | 0       | 0        | 0       | 0        | 0       | 0        | 0       | 0       | 0        |
| Haloferax         | 1              | 20             | 0         | 0         | 0        | 0         | 0         | 0        | 0       | 0        | 0        | 0       | 0        | 0       | 0        | 0       | 0        | 0       | 0       | 0        |
| Halogeometricum   | 1              | 12             | 0         | 0         | 0        | 0         | 0         | 0        | 0       | 0        | 0        | 0       | 0        | 0       | 0        | 0       | 0        | 0       | 0       | 0        |
| Halomicrobium     | 1              | 10             | 0         | 0         | 0        | 0         | 0         | 0        | 0       | 0        | 0        | 0       | 0        | 0       | 0        | 0       | 0        | 0       | 0       | 0        |
| Halomonas         | 1              | 149            | 0         | 0         | 0        | 0         | 0         | 0        | 0       | 0        | 0        | 1       | 0        | 0       | 0        | 0       | 0        | 0       | 0       | 0        |
| Halopiger         | 1              | 16             | 0         | 0         | 0        | 0         | 0         | 0        | 0       | 0        | 0        | 0       | 0        | 0       | 0        | 0       | 0        | 0       | 0       | 0        |
| Haloquadratum     | 1              | 19             | 0         | 0         | 0        | 0         | 0         | 0        | 0       | 0        | 0        | 0       | 0        | 0       | 0        | 0       | 0        | 0       | 0       | 0        |
| Halorhabdus       | 1              | 10             | 0         | 0         | 0        | 0         | 0         | 0        | 0       | 0        | 0        | 0       | 0        | 0       | 0        | 0       | 0        | 0       | 0       | 0        |
| Halorhodospira    | 2              | 71             | 0         | 1         | 0        | 0         | 0         | 1        | 0       | 0        | 0        | 0       | 0        | 0       | 0        | 0       | 0        | 0       | 0       | 0        |
| Halorubrum        | 1              | 16             | 0         | 0         | 0        | 0         | 0         | 0        | 0       | 0        | 0        | 0       | 0        | 0       | 0        | 0       | 0        | 0       | 0       | 0        |
| Haloterrigena     | 1              | 19             | 0         | 0         | 0        | 0         | 0         | 0        | 0       | 0        | 0        | 0       | 0        | 0       | 0        | 0       | 0        | 0       | 0       | 0        |
| Halothece         | 1              | 9              | 0         | 0         | 0        | 0         | 0         | 0        | 0       | 0        | 0        | 0       | 0        | 0       | 0        | 0       | 0        | 0       | 0       | 0        |
| Halothermothrix   | 2              | 50             | 0         | 0         | 0        | 0         | 0         | 0        | 0       | 1        | 0        | 0       | 0        | 0       | 0        | 1       | 0        | 0       | 0       | 0        |
| Halothiobacillus  | 2              | 65             | 0         | 0         | 0        | 0         | 0         | 0        | 0       | 0        | 0        | 1       | 0        | 0       | 0        | 0       | 0        | 0       | 0       | 0        |
| Halovivax         | 1              | 12             | 0         | 0         | 0        | 0         | 0         | 0        | 0       | 0        | 0        | 0       | 0        | 0       | 0        | 0       | 0        | 0       | 0       | 0        |
| Helicobacter      | 2              | 79             | 0         | 0         | 0        | 0         | 0         | 0        | 0       | 0        | 0        | 0       | 0        | 0       | 0        | 1       | 0        | 0       | 0       | 0        |
| Heliobacillus     | 1              | 4              | 0         | 0         | 0        | 0         | 0         | 0        | 0       | 0        | 0        | 0       | 0        | 0       | 0        | 0       | 0        | 0       | 0       | 0        |
| Heliobacterium    | 2              | 51             | 0         | 0         | 0        | 0         | 0         | 1        | 0       | 0        | 0        | 0       | 0        | 0       | 0        | 0       | 0        | 0       | 0       | 0        |
| Herbaspirillum    | 2              | 172            | 0         | 0         | 0        | 0         | 0         | 1        | 0       | 1        | 1        | 1       | 0        | 0       | 0        | 0       | 0        | 1       | 0       | 1        |
| Herminiimonas     | 3              | 89             | 0         | 0         | 0        | 0         | 0         | 0        | 0       | 0        | 0        | 0       | 0        | 0       | 0        | 0       | 0        | 0       | 0       | 0        |
| Herpetosiphon     | 3              | 90             | 0         | 1         | 0        | 0         | 0         | 0        | 0       | 0        | 0        | 1       | 0        | 0       | 0        | 0       | 0        | 0       | 0       | 0        |
| Hippea            | 2              | 44             | 0         | 0         | 0        | 0         | 0         | 0        | 0       | 0        | 0        | 1       | 0        | 0       | 0        | 1       | 0        | 0       | 0       | 0        |
| Hirschia          | 2              | 102            | 0         | 0         | 0        | 0         | 0         | 0        | 0       | 0        | 0        | 1       | 0        | 0       | 0        | 0       | 0        | 0       | 0       | 0        |
| Histophilus       | 2              | 72             | 0         | 0         | 0        | 0         | 0         | 0        | 0       | 0        | 0        | 0       | 0        | 0       | 0        | 0       | 0        | 0       | 0       | 0        |
| Hoeflea           | 1              | 16             | 0         | 0         | 0        | 0         | 0         | 0        | 0       | 0        | 0        | 0       | 0        | 0       | 0        | 0       | 1        | 0       | 0       | 0        |
| Hydrogenivirga    | 1              | 2              | 0         | 0         | 0        | 0         | 0         | 0        | 0       | 0        | 0        | 0       | 0        | 0       | 0        | 0       | 0        | 0       | 0       | 0        |
| Hydrogenobacter   | 2              | 55             | 0         | 0         | 0        | 0         | 0         | 0        | 0       | 0        | 0        | 1       | 0        | 0       | 0        | 1       | 1        | 0       | 0       | 0        |
| Hydrogenobaculum  | 2              | 44             | 0         | 0         | 0        | 0         | 0         | 0        | 0       | 0        | 0        | 0       | 0        | 0       | 0        | 1       | 0        | 0       | 0       | 0        |
| Hydrogenophaga    | 1              | 9              | 0         | 0         | 0        | 0         | 0         | 0        | 0       | 0        | 0        | 0       | 0        | 0       | 0        | 0       | 0        | 0       | 0       | 0        |
| Hylemonella       | 1              | 4              | 0         | 0         | 0        | 0         | 0         | 0        | 0       | 0        | 0        | 0       | 0        | 0       | 0        | 0       | 0        | 0       | 0       | 0        |

| Genus                 | Cluster Number | Protein Counts | 1.14.14.1 | 1.14.99.- | 1.17.3.2 | 1.17.99.1 | 1.17.99.2 | 1.18.6.1 | 1.2.1.- | 1.2.1.10 | 1.2.1.28 | 1.2.1.3 | 1.2.1.39 | 1.2.1.5 | 1.2.1.65 | 1.2.7.1 | 1.2.99.2 | 1.3.1.- | 1.3.1.2 | 1.3.1.25 |
|-----------------------|----------------|----------------|-----------|-----------|----------|-----------|-----------|----------|---------|----------|----------|---------|----------|---------|----------|---------|----------|---------|---------|----------|
| Hyperthermus          | 1              | 6              | 0         | 0         | 0        | 0         | 0         | 0        | 0       | 0        | 0        | 0       | 0        | 0       | 0        | 0       | 0        | 0       | 0       | 0        |
| Hyphomicrobium        | 2              | 93             | 0         | 1         | 0        | 0         | 0         | 1        | 0       | 0        | 0        | 1       | 0        | 0       | 0        | 0       | 0        | 0       | 0       | 0        |
| Hyphomonas            | 3              | 105            | 0         | 0         | 0        | 0         | 0         | 0        | 0       | 0        | 0        | 1       | 0        | 0       | 0        | 0       | 0        | 0       | 0       | 0        |
| Ideonella             | 1              | 18             | 0         | 0         | 0        | 0         | 1         | 1        | 0       | 1        | 0        | 0       | 0        | 0       | 0        | 0       | 0        | 0       | 0       | 0        |
| Idiomarina            | 2              | 86             | 0         | 0         | 0        | 0         | 0         | 0        | 0       | 0        | 0        | 1       | 0        | 0       | 0        | 0       | 0        | 0       | 0       | 0        |
| Ignavibacterium       | 1              | 14             | 0         | 0         | 0        | 0         | 0         | 0        | 0       | 0        | 0        | 0       | 0        | 0       | 0        | 0       | 0        | 0       | 0       | 0        |
| Ignicoccus            | 1              | 5              | 0         | 0         | 0        | 0         | 0         | 0        | 0       | 0        | 0        | 0       | 0        | 0       | 0        | 0       | 0        | 0       | 0       | 0        |
| Ignisphaera           | 1              | 8              | 0         | 0         | 0        | 0         | 0         | 0        | 0       | 0        | 0        | 0       | 0        | 0       | 0        | 0       | 0        | 0       | 0       | 0        |
| Ilyobacter            | 2              | 85             | 0         | 0         | 0        | 0         | 0         | 1        | 0       | 1        | 0        | 0       | 0        | 0       | 0        | 1       | 0        | 0       | 0       | 0        |
| Intrasporangium       | 2              | 114            | 0         | 0         | 0        | 0         | 0         | 0        | 0       | 1        | 0        | 1       | 0        | 0       | 0        | 0       | 1        | 0       | 1       | 0        |
| Isoptericola          | 1              | 18             | 0         | 0         | 0        | 0         | 0         | 0        | 0       | 0        | 0        | 0       | 0        | 0       | 0        | 0       | 0        | 0       | 0       | 0        |
| Isosphaera            | 2              | 75             | 0         | 1         | 0        | 0         | 0         | 0        | 0       | 0        | 0        | 1       | 0        | 0       | 0        | 0       | 0        | 0       | 0       | 0        |
| Jannaschia            | 3              | 151            | 0         | 1         | 0        | 0         | 0         | 0        | 0       | 0        | 0        | 1       | 0        | 0       | 0        | 0       | 1        | 0       | 1       | 0        |
| Janthinobacterium     | 2              | 99             | 0         | 0         | 0        | 0         | 0         | 0        | 0       | 0        | 0        | 0       | 0        | 0       | 0        | 0       | 1        | 0       | 0       | 0        |
| Jonesia               | 2              | 56             | 0         | 1         | 0        | 0         | 0         | 0        | 0       | 0        | 0        | 1       | 0        | 0       | 0        | 0       | 0        | 0       | 0       | 0        |
| Joostella             | 1              | 3              | 0         | 0         | 0        | 0         | 0         | 0        | 0       | 0        | 0        | 0       | 0        | 0       | 0        | 0       | 0        | 0       | 0       | 0        |
| Kaistia               | 1              | 2              | 0         | 0         | 0        | 0         | 0         | 0        | 0       | 0        | 0        | 0       | 0        | 0       | 0        | 0       | 0        | 0       | 0       | 0        |
| Kangiella             | 2              | 84             | 0         | 0         | 0        | 0         | 0         | 0        | 0       | 0        | 0        | 1       | 0        | 0       | 0        | 0       | 0        | 0       | 0       | 0        |
| Ketogulonicigenium    | 2              | 102            | 0         | 0         | 0        | 0         | 0         | 0        | 0       | 0        | 0        | 1       | 0        | 0       | 0        | 0       | 0        | 0       | 0       | 0        |
| Kineococcus           | 1              | 24             | 0         | 0         | 0        | 0         | 0         | 0        | 0       | 0        | 0        | 0       | 0        | 0       | 0        | 0       | 0        | 0       | 0       | 0        |
| Kinetoplastibacterium | 1              | 2              | 0         | 0         | 0        | 0         | 0         | 0        | 0       | 0        | 0        | 0       | 0        | 0       | 0        | 0       | 0        | 0       | 0       | 0        |
| Kingella              | 1              | 4              | 0         | 0         | 0        | 0         | 0         | 0        | 0       | 0        | 0        | 0       | 0        | 0       | 0        | 0       | 0        | 0       | 0       | 0        |
| Kitasatospora         | 1              | 36             | 0         | 0         | 0        | 0         | 0         | 0        | 0       | 0        | 0        | 0       | 0        | 0       | 0        | 0       | 0        | 0       | 0       | 0        |
| Klebsiella            | 3              | 222            | 0         | 0         | 0        | 0         | 0         | 1        | 1       | 1        | 0        | 1       | 1        | 0       | 0        | 0       | 0        | 0       | 0       | 1        |
| Kluyvera              | 1              | 1              | 0         | 0         | 0        | 0         | 0         | 0        | 0       | 0        | 0        | 0       | 0        | 0       | 0        | 0       | 0        | 0       | 0       | 0        |
| Kocuria               | 2              | 87             | 0         | 1         | 0        | 0         | 0         | 0        | 0       | 0        | 0        | 1       | 0        | 0       | 0        | 0       | 0        | 0       | 0       | 0        |
| Kordia                | 1              | 5              | 0         | 0         | 0        | 0         | 0         | 0        | 0       | 0        | 0        | 0       | 0        | 0       | 0        | 0       | 0        | 0       | 0       | 0        |
| Kosmotoga             | 2              | 61             | 0         | 0         | 0        | 0         | 0         | 0        | 0       | 0        | 0        | 0       | 0        | 0       | 0        | 1       | 0        | 0       | 0       | 0        |
| Kribbella             | 2              | 99             | 0         | 1         | 0        | 0         | 0         | 0        | 0       | 0        | 0        | 1       | 0        | 0       | 0        | 0       | 0        | 0       | 0       | 0        |
| Krokinobacter         | 2              | 90             | 0         | 1         | 0        | 0         | 0         | 0        | 0       | 0        | 0        | 1       | 0        | 0       | 0        | 0       | 0        | 0       | 0       | 0        |
| Kyrpidia              | 2              | 113            | 0         | 0         | 0        | 0         | 0         | 0        | 0       | 1        | 0        | 1       | 1        | 0       | 0        | 0       | 1        | 0       | 0       | 0        |
| Kytococcus            | 2              | 70             | 0         | 1         | 0        | 0         | 0         | 0        | 0       | 0        | 0        | 1       | 0        | 0       | 0        | 0       | 0        | 0       | 0       | 0        |
| Labrenzia             | 1              | 4              | 0         | 0         | 0        | 0         | 0         | 0        | 0       | 0        | 0        | 0       | 0        | 0       | 0        | 0       | 0        | 0       | 0       | 0        |
| Lachnoanaerobaculum   | 1              | 1              | 0         | 0         | 0        | 0         | 0         | 0        | 0       | 0        | 0        | 0       | 0        | 0       | 0        | 0       | 0        | 0       | 0       | 0        |
| Lachnospiraceae       | 1              | 51             | 0         | 0         | 0        | 0         | 0         | 0        | 0       | 0        | 0        | 1       | 0        | 0       | 0        | 1       | 0        | 0       | 1       | 0        |
| Lacinutrix            | 1              | 20             | 0         | 0         | 0        | 0         | 0         | 0        | 0       | 0        | 0        | 0       | 0        | 0       | 0        | 0       | 0        | 0       | 0       | 0        |
| Lactobacillus         | 2              | 119            | 0         | 1         | 0        | 0         | 0         | 0        | 0       | 1        | 0        | 1       | 0        | 0       | 0        | 0       | 0        | 0       | 1       | 0        |
| Lactococcus           | 2              | 82             | 0         | 0         | 0        | 0         | 0         | 0        | 0       | 1        | 0        | 0       | 0        | 0       | 0        | 0       | 0        | 0       | 0       | 0        |
| Lamprocystis          | 1              | 2              | 0         | 0         | 0        | 0         | 0         | 0        | 0       | 0        | 0        | 0       | 0        | 0       | 0        | 0       | 0        | 0       | 0       | 0        |
| Laribacter            | 2              | 80             | 0         | 0         | 0        | 0         | 0         | 0        | 0       | 0        | 0        | 1       | 0        | 0       | 0        | 0       | 0        | 0       | 0       | 0        |
| Lawsonia              | 2              | 33             | 0         | 0         | 0        | 0         | 0         | 0        | 0       | 0        | 0        | 0       | 0        | 0       | 0        | 0       | 0        | 0       | 0       | 0        |
| Leadbetterella        | 2              | 79             | 0         | 0         | 0        | 0         | 0         | 0        | 0       | 0        | 0        | 1       | 0        | 0       | 0        | 0       | 0        | 0       | 0       | 0        |
| Leeuwenhoekiiella     | 1              | 2              | 0         | 0         | 0        | 0         | 0         | 0        | 0       | 0        | 0        | 0       | 0        | 0       | 0        | 0       | 0        | 0       | 0       | 0        |
| Legionella            | 2              | 117            | 0         | 0         | 0        | 0         | 0         | 0        | 0       | 0        | 0        | 1       | 0        | 0       | 0        | 0       | 0        | 0       | 0       | 0        |
| Leifsonia             | 2              | 48             | 0         | 1         | 0        | 0         | 0         | 0        | 0       | 0        | 0        | 1       | 0        | 0       | 0        | 0       | 0        | 0       | 0       | 0        |
| Leptolyngbya          | 1              | 10             | 0         | 0         | 0        | 0         | 0         | 0        | 0       | 0        | 0        | 0       | 0        | 0       | 0        | 0       | 0        | 0       | 0       | 0        |
| Leptospira            | 2              | 76             | 0         | 0         | 0        | 0         | 0         | 0        | 0       | 0        | 0        | 1       | 0        | 0       | 0        | 0       | 0        | 0       | 0       | 0        |
| Leptospirillum        | 1              | 10             | 0         | 0         | 0        | 0         | 0         | 0        | 0       | 0        | 0        | 0       | 0        | 0       | 0        | 0       | 0        | 0       | 0       | 0        |
| Leptothrix            | 3              | 186            | 0         | 0         | 0        | 0         | 0         | 1        | 0       | 1        | 0        | 1       | 0        | 0       | 0        | 1       | 0        | 0       | 0       | 0        |
| Leptotrichia          | 2              | 43             | 0         | 0         | 0        | 0         | 0         | 0        | 0       | 0        | 0        | 0       | 0        | 0       | 0        | 0       | 0        | 0       | 0       | 0        |
| Leucobacter           | 1              | 2              | 0         | 0         | 0        | 0         | 0         | 0        | 0       | 0        | 0        | 0       | 0        | 0       | 0        | 0       | 0        | 0       | 0       | 0        |
| Leuconostoc           | 2              | 64             | 0         | 1         | 0        | 0         | 0         | 0        | 0       | 1        | 0        | 1       | 0        | 0       | 0        | 0       | 0        | 0       | 0       | 0        |

| Genus                | Cluster Number | Protein Counts | 1.14.14.1 | 1.14.99.- | 1.17.3.2 | 1.17.99.1 | 1.17.99.2 | 1.18.6.1 | 1.2.1.- | 1.2.1.10 | 1.2.1.28 | 1.2.1.3 | 1.2.1.39 | 1.2.1.5 | 1.2.1.65 | 1.2.7.1 | 1.2.99.2 | 1.3.1.- | 1.3.1.2 | 1.3.1.25 |
|----------------------|----------------|----------------|-----------|-----------|----------|-----------|-----------|----------|---------|----------|----------|---------|----------|---------|----------|---------|----------|---------|---------|----------|
| Liberibacter         | 1              | 4              | 0         | 0         | 0        | 0         | 0         | 0        | 0       | 0        | 0        | 0       | 0        | 0       | 0        | 0       | 0        | 0       | 0       | 0        |
| Limnohabitans        | 1              | 11             | 0         | 0         | 0        | 0         | 0         | 0        | 0       | 0        | 0        | 1       | 0        | 0       | 0        | 0       | 0        | 0       | 0       | 0        |
| Listeria             | 2              | 77             | 0         | 0         | 0        | 0         | 0         | 0        | 1       | 1        | 0        | 0       | 0        | 0       | 0        | 0       | 0        | 0       | 0       | 0        |
| Listeriaceae         | 1              | 6              | 0         | 0         | 0        | 0         | 0         | 0        | 0       | 1        | 0        | 0       | 0        | 0       | 0        | 0       | 0        | 0       | 0       | 0        |
| Listonella           | 1              | 38             | 0         | 0         | 0        | 0         | 0         | 0        | 0       | 1        | 0        | 0       | 0        | 0       | 0        | 0       | 0        | 0       | 0       | 0        |
| Loktanella           | 1              | 3              | 0         | 0         | 0        | 0         | 0         | 0        | 0       | 0        | 0        | 0       | 0        | 0       | 0        | 0       | 0        | 0       | 0       | 0        |
| Lysinibacillus       | 2              | 97             | 0         | 1         | 0        | 0         | 0         | 0        | 0       | 0        | 0        | 1       | 0        | 0       | 0        | 0       | 0        | 0       | 1       | 0        |
| Macrococcus          | 2              | 60             | 0         | 1         | 0        | 0         | 0         | 0        | 0       | 0        | 0        | 1       | 0        | 0       | 0        | 0       | 0        | 0       | 0       | 0        |
| Magnetococcus        | 2              | 64             | 0         | 0         | 0        | 0         | 0         | 1        | 0       | 0        | 0        | 1       | 0        | 0       | 0        | 0       | 0        | 0       | 0       | 0        |
| Magnetospirillum     | 2              | 113            | 0         | 1         | 0        | 0         | 0         | 1        | 0       | 0        | 0        | 1       | 0        | 0       | 0        | 1       | 0        | 0       | 0       | 0        |
| Mahella              | 2              | 58             | 0         | 0         | 0        | 0         | 0         | 0        | 0       | 1        | 0        | 1       | 0        | 0       | 0        | 1       | 0        | 0       | 0       | 0        |
| Mannheimia           | 2              | 85             | 0         | 0         | 0        | 0         | 0         | 0        | 0       | 1        | 0        | 1       | 0        | 0       | 0        | 0       | 0        | 0       | 0       | 0        |
| Maribacter           | 3              | 87             | 0         | 1         | 0        | 0         | 0         | 0        | 0       | 0        | 0        | 1       | 0        | 0       | 0        | 0       | 0        | 0       | 0       | 0        |
| Maricaulis           | 3              | 87             | 0         | 0         | 0        | 0         | 0         | 0        | 0       | 0        | 0        | 1       | 0        | 0       | 0        | 0       | 0        | 0       | 0       | 0        |
| Marichromatium       | 1              | 2              | 0         | 0         | 0        | 0         | 0         | 0        | 0       | 0        | 0        | 0       | 0        | 0       | 0        | 0       | 0        | 0       | 0       | 0        |
| Marinithermus        | 2              | 77             | 0         | 0         | 0        | 0         | 0         | 0        | 1       | 0        | 0        | 1       | 0        | 0       | 0        | 0       | 0        | 0       | 0       | 0        |
| Marinitoga           | 1              | 15             | 0         | 0         | 0        | 0         | 0         | 0        | 0       | 0        | 0        | 0       | 0        | 0       | 0        | 0       | 0        | 0       | 0       | 0        |
| Marinobacter         | 2              | 163            | 0         | 1         | 0        | 0         | 0         | 0        | 0       | 1        | 0        | 1       | 0        | 0       | 0        | 0       | 0        | 0       | 0       | 1        |
| Marinomonas          | 3              | 192            | 0         | 1         | 0        | 0         | 0         | 0        | 0       | 1        | 1        | 1       | 1        | 0       | 0        | 0       | 0        | 1       | 0       | 1        |
| Maritimibacter       | 1              | 7              | 0         | 0         | 0        | 0         | 0         | 0        | 0       | 0        | 0        | 0       | 0        | 0       | 0        | 0       | 0        | 0       | 0       | 0        |
| Marivirga            | 2              | 96             | 0         | 1         | 0        | 0         | 0         | 0        | 0       | 0        | 0        | 1       | 0        | 0       | 0        | 0       | 0        | 0       | 0       | 0        |
| Martelella           | 1              | 3              | 0         | 0         | 0        | 0         | 0         | 0        | 0       | 0        | 0        | 0       | 0        | 0       | 0        | 0       | 0        | 0       | 0       | 0        |
| Marvinbryantia       | 1              | 1              | 0         | 0         | 0        | 0         | 0         | 0        | 0       | 0        | 0        | 0       | 0        | 0       | 0        | 0       | 0        | 0       | 0       | 0        |
| Massilia             | 1              | 4              | 0         | 0         | 0        | 0         | 0         | 0        | 0       | 0        | 0        | 0       | 0        | 0       | 0        | 0       | 0        | 0       | 0       | 0        |
| Mastigocladopsis     | 1              | 16             | 0         | 0         | 0        | 0         | 0         | 1        | 0       | 0        | 0        | 0       | 0        | 0       | 0        | 0       | 0        | 0       | 0       | 0        |
| Megamonas            | 1              | 47             | 0         | 0         | 0        | 0         | 0         | 0        | 0       | 0        | 0        | 0       | 0        | 0       | 0        | 0       | 0        | 0       | 0       | 0        |
| Megasphaera          | 1              | 14             | 0         | 0         | 0        | 0         | 0         | 0        | 0       | 0        | 0        | 0       | 0        | 0       | 0        | 0       | 0        | 0       | 0       | 0        |
| Meiothermus          | 2              | 110            | 0         | 1         | 0        | 0         | 0         | 0        | 1       | 0        | 0        | 1       | 0        | 0       | 0        | 0       | 1        | 0       | 1       | 0        |
| Melissococcus        | 2              | 46             | 0         | 0         | 0        | 0         | 0         | 0        | 0       | 0        | 0        | 0       | 0        | 0       | 0        | 0       | 0        | 0       | 0       | 0        |
| Mesoflavibacter      | 1              | 6              | 0         | 0         | 0        | 0         | 0         | 0        | 0       | 0        | 0        | 0       | 0        | 0       | 0        | 0       | 0        | 0       | 0       | 0        |
| Mesoplasma           | 1              | 23             | 0         | 0         | 0        | 0         | 0         | 0        | 0       | 0        | 0        | 0       | 0        | 0       | 0        | 0       | 0        | 0       | 0       | 0        |
| Mesorhizobium        | 2              | 201            | 0         | 0         | 0        | 0         | 0         | 1        | 0       | 0        | 0        | 1       | 0        | 0       | 0        | 0       | 1        | 1       | 1       | 0        |
| Mesotoga             | 1              | 14             | 0         | 0         | 0        | 0         | 0         | 0        | 0       | 0        | 0        | 0       | 0        | 0       | 0        | 0       | 0        | 0       | 0       | 0        |
| Metallosphaera       | 1              | 18             | 0         | 0         | 0        | 0         | 0         | 0        | 0       | 0        | 0        | 0       | 0        | 0       | 0        | 0       | 0        | 0       | 0       | 0        |
| Methanobacterium     | 1              | 7              | 0         | 0         | 0        | 0         | 0         | 0        | 0       | 0        | 0        | 0       | 0        | 0       | 0        | 0       | 0        | 0       | 0       | 0        |
| Methanobrevibacter   | 1              | 9              | 0         | 0         | 0        | 0         | 0         | 0        | 0       | 0        | 0        | 0       | 0        | 0       | 0        | 0       | 0        | 0       | 0       | 0        |
| Methanocaldococcus   | 1              | 6              | 0         | 0         | 0        | 0         | 0         | 0        | 0       | 0        | 0        | 0       | 0        | 0       | 0        | 0       | 0        | 0       | 0       | 0        |
| Methanocella         | 1              | 15             | 0         | 0         | 0        | 0         | 0         | 0        | 0       | 0        | 0        | 0       | 0        | 0       | 0        | 0       | 0        | 0       | 0       | 0        |
| Methanococcaceae     | 1              | 1              | 0         | 0         | 0        | 0         | 0         | 0        | 0       | 0        | 0        | 0       | 0        | 0       | 0        | 0       | 0        | 0       | 0       | 0        |
| Methanococcoides     | 1              | 5              | 0         | 0         | 0        | 0         | 0         | 0        | 0       | 0        | 0        | 0       | 0        | 0       | 0        | 0       | 0        | 0       | 0       | 0        |
| Methanococcus        | 1              | 9              | 0         | 0         | 0        | 0         | 0         | 0        | 0       | 0        | 0        | 0       | 0        | 0       | 0        | 0       | 0        | 0       | 0       | 0        |
| Methanocorpusculum   | 1              | 7              | 0         | 0         | 0        | 0         | 0         | 0        | 0       | 0        | 0        | 0       | 0        | 0       | 0        | 0       | 0        | 0       | 0       | 0        |
| Methanoculleus       | 1              | 8              | 0         | 0         | 0        | 0         | 0         | 0        | 0       | 0        | 0        | 0       | 0        | 0       | 0        | 0       | 0        | 0       | 0       | 0        |
| Methanohalobium      | 1              | 5              | 0         | 0         | 0        | 0         | 0         | 0        | 0       | 0        | 0        | 0       | 0        | 0       | 0        | 0       | 0        | 0       | 0       | 0        |
| Methanohalophilus    | 1              | 5              | 0         | 0         | 0        | 0         | 0         | 0        | 0       | 0        | 0        | 0       | 0        | 0       | 0        | 0       | 0        | 0       | 0       | 0        |
| Methanolobus         | 1              | 5              | 0         | 0         | 0        | 0         | 0         | 0        | 0       | 0        | 0        | 0       | 0        | 0       | 0        | 0       | 0        | 0       | 0       | 0        |
| Methanomethylovorans | 1              | 5              | 0         | 0         | 0        | 0         | 0         | 0        | 0       | 0        | 0        | 0       | 0        | 0       | 0        | 0       | 0        | 0       | 0       | 0        |
| Methanoplanus        | 1              | 7              | 0         | 0         | 0        | 0         | 0         | 0        | 0       | 0        | 0        | 0       | 0        | 0       | 0        | 0       | 0        | 0       | 0       | 0        |
| Methanopyrus         | 1              | 4              | 0         | 0         | 0        | 0         | 0         | 0        | 0       | 0        | 0        | 0       | 0        | 0       | 0        | 0       | 0        | 0       | 0       | 0        |
| Methanoregula        | 1              | 8              | 0         | 0         | 0        | 0         | 0         | 0        | 0       | 0        | 0        | 0       | 0        | 0       | 0        | 0       | 0        | 0       | 0       | 0        |
| Methanosaeta         | 1              | 9              | 0         | 0         | 0        | 0         | 0         | 0        | 0       | 0        | 0        | 0       | 0        | 0       | 0        | 0       | 0        | 0       | 0       | 0        |
| Methanosalsum        | 1              | 7              | 0         | 0         | 0        | 0         | 0         | 0        | 0       | 0        | 0        | 0       | 0        | 0       | 0        | 0       | 0        | 0       | 0       | 0        |

| Genus               | Cluster Number | Protein Counts | 1.14.14.1 | 1.14.99.- | 1.17.3.2 | 1.17.99.1 | 1.17.99.2 | 1.18.6.1 | 1.2.1.- | 1.2.1.10 | 1.2.1.28 | 1.2.1.3 | 1.2.1.39 | 1.2.1.5 | 1.2.1.65 | 1.2.7.1 | 1.2.99.2 | 1.3.1.- | 1.3.1.2 | 1.3.1.25 |
|---------------------|----------------|----------------|-----------|-----------|----------|-----------|-----------|----------|---------|----------|----------|---------|----------|---------|----------|---------|----------|---------|---------|----------|
| Methanosarcina      | 1              | 18             | 0         | 0         | 0        | 0         | 0         | 0        | 0       | 0        | 0        | 0       | 0        | 0       | 0        | 0       | 0        | 0       | 0       | 0        |
| Methanosphaera      | 1              | 7              | 0         | 0         | 0        | 0         | 0         | 0        | 0       | 0        | 0        | 0       | 0        | 0       | 0        | 0       | 0        | 0       | 0       | 0        |
| Methanosphaerula    | 1              | 8              | 0         | 0         | 0        | 0         | 0         | 0        | 0       | 0        | 0        | 0       | 0        | 0       | 0        | 0       | 0        | 0       | 0       | 0        |
| Methanospirillum    | 1              | 6              | 0         | 0         | 0        | 0         | 0         | 0        | 0       | 0        | 0        | 0       | 0        | 0       | 0        | 0       | 0        | 0       | 0       | 0        |
| Methanothermobacter | 1              | 6              | 0         | 0         | 0        | 0         | 0         | 0        | 0       | 0        | 0        | 0       | 0        | 0       | 0        | 0       | 0        | 0       | 0       | 0        |
| Methanothermococcus | 1              | 5              | 0         | 0         | 0        | 0         | 0         | 0        | 0       | 0        | 0        | 0       | 0        | 0       | 0        | 0       | 0        | 0       | 0       | 0        |
| Methanothermus      | 1              | 5              | 0         | 0         | 0        | 0         | 0         | 0        | 0       | 0        | 0        | 0       | 0        | 0       | 0        | 0       | 0        | 0       | 0       | 0        |
| Methanotorris       | 1              | 5              | 0         | 0         | 0        | 0         | 0         | 0        | 0       | 0        | 0        | 0       | 0        | 0       | 0        | 0       | 0        | 0       | 0       | 0        |
| Methylacidiphilum   | 2              | 48             | 0         | 0         | 0        | 0         | 0         | 1        | 0       | 0        | 0        | 1       | 0        | 0       | 0        | 0       | 0        | 0       | 1       | 0        |
| Methylarcula        | 1              | 2              | 0         | 0         | 0        | 0         | 0         | 0        | 0       | 0        | 0        | 0       | 0        | 0       | 0        | 0       | 0        | 0       | 0       | 0        |
| Methylibium         | 1              | 38             | 0         | 0         | 0        | 0         | 0         | 0        | 0       | 0        | 0        | 1       | 0        | 0       | 0        | 0       | 0        | 0       | 0       | 0        |
| Methylobacillus     | 2              | 61             | 0         | 0         | 0        | 0         | 0         | 0        | 0       | 0        | 0        | 1       | 0        | 0       | 0        | 0       | 0        | 0       | 0       | 0        |
| Methylobacterium    | 3              | 236            | 0         | 1         | 0        | 0         | 0         | 1        | 0       | 0        | 0        | 1       | 0        | 0       | 0        | 0       | 1        | 0       | 0       | 1        |
| Methylocella        | 3              | 117            | 0         | 1         | 0        | 0         | 0         | 1        | 0       | 1        | 0        | 1       | 0        | 0       | 0        | 0       | 0        | 0       | 0       | 0        |
| Methylococcus       | 2              | 80             | 0         | 0         | 0        | 0         | 0         | 1        | 0       | 0        | 0        | 0       | 0        | 0       | 0        | 0       | 0        | 0       | 0       | 0        |
| Methylocystis       | 1              | 21             | 0         | 0         | 0        | 0         | 0         | 1        | 0       | 0        | 0        | 0       | 0        | 0       | 0        | 0       | 0        | 0       | 0       | 0        |
| Methyloferula       | 1              | 2              | 0         | 0         | 0        | 0         | 0         | 1        | 0       | 0        | 0        | 0       | 0        | 0       | 0        | 0       | 0        | 0       | 0       | 0        |
| Methylomicrobium    | 1              | 12             | 0         | 0         | 0        | 0         | 0         | 0        | 0       | 0        | 0        | 0       | 0        | 0       | 0        | 0       | 0        | 0       | 0       | 0        |
| Methylomonas        | 1              | 15             | 0         | 0         | 0        | 0         | 0         | 0        | 0       | 0        | 0        | 0       | 0        | 0       | 0        | 0       | 0        | 0       | 0       | 0        |
| Methylophaga        | 1              | 7              | 0         | 0         | 0        | 0         | 0         | 0        | 0       | 0        | 0        | 0       | 0        | 0       | 0        | 0       | 0        | 0       | 0       | 0        |
| Methylophilus       | 1              | 2              | 0         | 0         | 0        | 0         | 0         | 0        | 0       | 0        | 0        | 0       | 0        | 0       | 0        | 0       | 0        | 0       | 0       | 0        |
| Methylosinus        | 1              | 2              | 0         | 0         | 0        | 0         | 0         | 1        | 0       | 0        | 0        | 0       | 0        | 0       | 0        | 0       | 0        | 0       | 0       | 0        |
| Methylotenera       | 2              | 72             | 0         | 1         | 0        | 0         | 0         | 0        | 0       | 0        | 0        | 1       | 0        | 0       | 0        | 0       | 0        | 0       | 0       | 0        |
| Methyloversatilis   | 1              | 5              | 0         | 0         | 0        | 0         | 0         | 1        | 0       | 0        | 0        | 0       | 0        | 0       | 0        | 0       | 0        | 0       | 0       | 0        |
| Methylovorus        | 2              | 66             | 0         | 0         | 0        | 0         | 0         | 0        | 0       | 0        | 0        | 1       | 0        | 0       | 0        | 0       | 0        | 0       | 0       | 0        |
| Micavibrio          | 1              | 9              | 0         | 0         | 0        | 0         | 0         | 0        | 0       | 0        | 0        | 0       | 0        | 0       | 0        | 0       | 0        | 0       | 0       | 0        |
| Microbacterium      | 2              | 115            | 0         | 1         | 0        | 0         | 0         | 0        | 0       | 0        | 0        | 1       | 0        | 0       | 0        | 0       | 0        | 0       | 0       | 0        |
| Microchaete         | 1              | 23             | 0         | 0         | 0        | 0         | 0         | 1        | 0       | 0        | 0        | 0       | 0        | 0       | 0        | 0       | 0        | 0       | 0       | 0        |
| Micrococcus         | 2              | 72             | 0         | 1         | 0        | 0         | 0         | 0        | 0       | 0        | 0        | 1       | 0        | 0       | 0        | 0       | 0        | 0       | 0       | 0        |
| Microcoleus         | 1              | 17             | 0         | 0         | 0        | 0         | 0         | 0        | 0       | 0        | 0        | 0       | 0        | 0       | 0        | 0       | 0        | 0       | 0       | 0        |
| Microcystis         | 2              | 67             | 0         | 0         | 0        | 0         | 0         | 0        | 0       | 0        | 0        | 1       | 0        | 0       | 0        | 0       | 0        | 0       | 0       | 0        |
| Microlunatus        | 1              | 25             | 0         | 0         | 0        | 0         | 0         | 0        | 0       | 0        | 0        | 0       | 0        | 0       | 0        | 0       | 0        | 0       | 0       | 0        |
| Micromonospora      | 2              | 115            | 0         | 1         | 0        | 0         | 0         | 0        | 0       | 1        | 0        | 1       | 0        | 0       | 0        | 0       | 1        | 0       | 0       | 0        |
| Microvirga          | 1              | 6              | 0         | 0         | 0        | 0         | 0         | 1        | 0       | 0        | 0        | 0       | 0        | 0       | 0        | 0       | 0        | 0       | 0       | 0        |
| Mobiluncus          | 1              | 41             | 0         | 0         | 0        | 0         | 0         | 0        | 0       | 0        | 0        | 1       | 0        | 0       | 0        | 1       | 0        | 0       | 0       | 0        |
| Modestobacter       | 1              | 43             | 0         | 0         | 0        | 0         | 0         | 0        | 0       | 0        | 0        | 0       | 0        | 0       | 0        | 0       | 0        | 0       | 0       | 0        |
| Moorea              | 1              | 2              | 0         | 0         | 0        | 0         | 0         | 0        | 0       | 0        | 0        | 0       | 0        | 0       | 0        | 0       | 0        | 0       | 0       | 0        |
| Moorella            | 2              | 69             | 0         | 0         | 0        | 0         | 0         | 1        | 0       | 1        | 0        | 0       | 0        | 0       | 0        | 1       | 1        | 0       | 0       | 0        |
| Moraxella           | 2              | 66             | 0         | 0         | 0        | 0         | 0         | 0        | 0       | 0        | 0        | 1       | 0        | 0       | 0        | 0       | 0        | 0       | 0       | 0        |
| Morganella          | 1              | 29             | 0         | 0         | 0        | 0         | 0         | 0        | 0       | 0        | 0        | 0       | 0        | 0       | 0        | 0       | 0        | 0       | 0       | 0        |
| Moritella           | 1              | 2              | 0         | 0         | 0        | 0         | 0         | 0        | 0       | 0        | 0        | 0       | 0        | 0       | 0        | 0       | 0        | 0       | 0       | 0        |
| Muricauda           | 1              | 23             | 0         | 0         | 0        | 0         | 0         | 0        | 0       | 0        | 0        | 0       | 0        | 0       | 0        | 0       | 0        | 0       | 0       | 0        |
| Mycobacterium       | 3              | 306            | 0         | 1         | 0        | 0         | 0         | 0        | 0       | 1        | 0        | 1       | 0        | 0       | 0        | 0       | 1        | 1       | 0       | 1        |
| Mycoplasma          | 1              | 53             | 0         | 0         | 0        | 0         | 0         | 0        | 0       | 0        | 0        | 1       | 0        | 0       | 0        | 0       | 0        | 0       | 0       | 0        |
| Myxococcus          | 2              | 110            | 0         | 1         | 0        | 0         | 0         | 0        | 0       | 0        | 0        | 1       | 0        | 0       | 0        | 0       | 0        | 1       | 0       | 0        |
| Nakamurella         | 2              | 115            | 0         | 1         | 0        | 0         | 0         | 0        | 0       | 1        | 0        | 1       | 0        | 0       | 0        | 0       | 1        | 0       | 0       | 0        |
| napthalene          | 1              | 2              | 0         | 0         | 0        | 0         | 0         | 0        | 0       | 0        | 0        | 0       | 0        | 0       | 0        | 0       | 0        | 0       | 0       | 0        |
| Natranaerobius      | 2              | 55             | 0         | 0         | 0        | 0         | 0         | 0        | 0       | 0        | 0        | 0       | 0        | 0       | 0        | 0       | 0        | 0       | 0       | 0        |
| Natrialba           | 1              | 16             | 0         | 0         | 0        | 0         | 0         | 0        | 0       | 0        | 0        | 0       | 0        | 0       | 0        | 0       | 0        | 0       | 0       | 0        |
| Natrinema           | 1              | 16             | 0         | 0         | 0        | 0         | 0         | 0        | 0       | 0        | 0        | 0       | 0        | 0       | 0        | 0       | 0        | 0       | 0       | 0        |
| Natronobacterium    | 1              | 11             | 0         | 0         | 0        | 0         | 0         | 0        | 0       | 0        | 0        | 0       | 0        | 0       | 0        | 0       | 0        | 0       | 0       | 0        |
| Natronococcus       | 1              | 21             | 0         | 0         | 0        | 0         | 0         | 0        | 0       | 0        | 0        | 0       | 0        | 0       | 0        | 0       | 0        | 0       | 0       | 0        |

| Genus             | Cluster Number | Protein Counts | 1.14.14.1 | 1.14.99.- | 1.17.3.2 | 1.17.99.1 | 1.17.99.2 | 1.18.6.1 | 1.2.1.- | 1.2.1.10 | 1.2.1.28 | 1.2.1.3 | 1.2.1.39 | 1.2.1.5 | 1.2.1.65 | 1.2.7.1 | 1.2.99.2 | 1.3.1.- | 1.3.1.2 | 1.3.1.25 |
|-------------------|----------------|----------------|-----------|-----------|----------|-----------|-----------|----------|---------|----------|----------|---------|----------|---------|----------|---------|----------|---------|---------|----------|
| Natronomonas      | 1              | 20             | 0         | 0         | 0        | 0         | 0         | 0        | 0       | 0        | 0        | 0       | 0        | 0       | 0        | 0       | 0        | 0       | 0       | 0        |
| Nautilia          | 2              | 48             | 0         | 0         | 0        | 0         | 0         | 0        | 0       | 0        | 0        | 0       | 0        | 0       | 0        | 1       | 0        | 0       | 0       | 0        |
| Neisseria         | 2              | 67             | 0         | 0         | 0        | 0         | 0         | 0        | 0       | 0        | 0        | 0       | 0        | 0       | 0        | 0       | 0        | 0       | 0       | 0        |
| Neisseriaceae     | 1              | 1              | 0         | 0         | 0        | 0         | 0         | 0        | 0       | 0        | 0        | 0       | 0        | 0       | 0        | 0       | 0        | 0       | 0       | 0        |
| Neorickettsia     | 1              | 31             | 0         | 0         | 0        | 0         | 0         | 0        | 0       | 0        | 0        | 0       | 0        | 0       | 0        | 0       | 0        | 0       | 0       | 0        |
| Neptuniibacter    | 1              | 2              | 0         | 0         | 0        | 0         | 0         | 0        | 0       | 0        | 0        | 0       | 0        | 0       | 0        | 0       | 0        | 0       | 0       | 0        |
| Niastella         | 1              | 21             | 0         | 0         | 0        | 0         | 0         | 0        | 0       | 0        | 0        | 0       | 0        | 0       | 0        | 0       | 0        | 0       | 0       | 0        |
| Nitratifactor     | 2              | 54             | 0         | 0         | 0        | 0         | 0         | 0        | 0       | 0        | 0        | 0       | 0        | 0       | 0        | 1       | 0        | 0       | 0       | 0        |
| Nitratireductor   | 1              | 19             | 0         | 0         | 0        | 0         | 0         | 0        | 0       | 0        | 0        | 0       | 0        | 0       | 0        | 0       | 0        | 0       | 1       | 0        |
| Nitratiruptor     | 2              | 40             | 0         | 0         | 0        | 0         | 0         | 0        | 0       | 0        | 0        | 0       | 0        | 0       | 0        | 1       | 0        | 0       | 0       | 0        |
| Nitrobacter       | 2              | 99             | 0         | 0         | 0        | 0         | 0         | 0        | 0       | 0        | 0        | 1       | 0        | 0       | 0        | 0       | 1        | 0       | 0       | 0        |
| Nitrococcus       | 1              | 2              | 0         | 0         | 0        | 0         | 0         | 0        | 0       | 0        | 0        | 0       | 0        | 0       | 0        | 0       | 0        | 0       | 0       | 0        |
| Nitrosococcus     | 2              | 94             | 0         | 1         | 0        | 1         | 0         | 0        | 0       | 0        | 0        | 1       | 0        | 0       | 0        | 0       | 0        | 0       | 0       | 0        |
| Nitrosomonas      | 2              | 72             | 0         | 0         | 0        | 1         | 0         | 0        | 0       | 0        | 0        | 1       | 0        | 0       | 0        | 0       | 0        | 0       | 0       | 0        |
| Nitrosopumilaceae | 1              | 7              | 0         | 0         | 0        | 0         | 0         | 0        | 0       | 0        | 0        | 0       | 0        | 0       | 0        | 0       | 0        | 0       | 0       | 0        |
| Nitrosopumilus    | 1              | 11             | 0         | 0         | 0        | 0         | 0         | 0        | 0       | 0        | 0        | 0       | 0        | 0       | 0        | 0       | 0        | 0       | 0       | 0        |
| Nitrospira        | 2              | 74             | 0         | 0         | 0        | 1         | 0         | 0        | 0       | 0        | 0        | 0       | 0        | 0       | 0        | 0       | 0        | 0       | 0       | 0        |
| Nocardia          | 2              | 185            | 0         | 1         | 0        | 0         | 0         | 0        | 0       | 1        | 0        | 1       | 0        | 0       | 0        | 0       | 0        | 0       | 0       | 0        |
| Nocardioidaceae   | 1              | 2              | 0         | 0         | 0        | 0         | 0         | 0        | 0       | 0        | 0        | 0       | 0        | 0       | 0        | 0       | 0        | 0       | 0       | 0        |
| Nocardioides      | 2              | 157            | 0         | 1         | 0        | 0         | 0         | 0        | 0       | 1        | 0        | 1       | 0        | 0       | 0        | 1       | 1        | 0       | 0       | 0        |
| Nocardiopsis      | 2              | 102            | 0         | 1         | 0        | 0         | 0         | 0        | 0       | 0        | 0        | 1       | 0        | 0       | 0        | 0       | 0        | 0       | 0       | 0        |
| Nodularia         | 1              | 22             | 0         | 0         | 0        | 0         | 0         | 1        | 0       | 0        | 0        | 0       | 0        | 0       | 0        | 0       | 0        | 0       | 0       | 0        |
| Nonlabens         | 1              | 19             | 0         | 0         | 0        | 0         | 0         | 0        | 0       | 0        | 0        | 0       | 0        | 0       | 0        | 0       | 0        | 0       | 0       | 0        |
| Nostoc            | 2              | 111            | 1         | 1         | 0        | 0         | 0         | 1        | 0       | 0        | 0        | 1       | 0        | 0       | 0        | 0       | 0        | 0       | 0       | 0        |
| Nostocaceae       | 1              | 2              | 0         | 0         | 0        | 0         | 0         | 0        | 0       | 0        | 0        | 0       | 0        | 0       | 0        | 0       | 0        | 0       | 0       | 0        |
| Novosphingobium   | 2              | 169            | 0         | 0         | 0        | 1         | 0         | 0        | 0       | 1        | 0        | 1       | 0        | 0       | 0        | 0       | 0        | 0       | 0       | 1        |
| Oceanibaculum     | 1              | 3              | 0         | 0         | 0        | 0         | 0         | 0        | 0       | 0        | 0        | 0       | 0        | 0       | 0        | 0       | 0        | 0       | 0       | 0        |
| Oceanibulbus      | 1              | 12             | 0         | 0         | 0        | 0         | 0         | 0        | 0       | 0        | 0        | 0       | 0        | 0       | 0        | 0       | 0        | 0       | 0       | 0        |
| Oceanicola        | 1              | 9              | 0         | 0         | 0        | 0         | 0         | 0        | 0       | 0        | 0        | 1       | 0        | 0       | 0        | 0       | 0        | 0       | 0       | 0        |
| Oceanimonas       | 1              | 33             | 0         | 0         | 0        | 0         | 0         | 0        | 0       | 0        | 0        | 0       | 0        | 0       | 0        | 0       | 0        | 0       | 0       | 0        |
| Oceaniovalibus    | 1              | 2              | 0         | 0         | 0        | 0         | 0         | 0        | 0       | 0        | 0        | 0       | 0        | 0       | 0        | 0       | 0        | 0       | 0       | 0        |
| Oceanithermus     | 2              | 72             | 0         | 0         | 0        | 0         | 0         | 0        | 1       | 0        | 0        | 1       | 0        | 0       | 0        | 0       | 0        | 0       | 0       | 0        |
| Oceanobacillus    | 2              | 91             | 0         | 1         | 0        | 0         | 0         | 0        | 0       | 0        | 1        | 1       | 0        | 0       | 0        | 0       | 0        | 0       | 0       | 0        |
| Oceanospirillum   | 1              | 2              | 0         | 0         | 0        | 0         | 0         | 0        | 0       | 0        | 0        | 0       | 0        | 0       | 0        | 0       | 0        | 0       | 0       | 0        |
| Ochrobactrum      | 2              | 133            | 0         | 0         | 0        | 0         | 0         | 0        | 0       | 0        | 0        | 1       | 0        | 0       | 0        | 0       | 0        | 0       | 1       | 0        |
| Octadecabacter    | 1              | 29             | 0         | 0         | 0        | 0         | 0         | 0        | 0       | 0        | 0        | 0       | 0        | 0       | 0        | 0       | 0        | 0       | 0       | 0        |
| Oenococcus        | 2              | 41             | 0         | 0         | 0        | 0         | 0         | 0        | 0       | 1        | 0        | 0       | 0        | 0       | 0        | 0       | 0        | 0       | 0       | 0        |
| Oleomonas         | 1              | 2              | 0         | 0         | 0        | 0         | 0         | 0        | 0       | 0        | 0        | 0       | 0        | 0       | 0        | 0       | 0        | 0       | 0       | 0        |
| Oligotropha       | 3              | 87             | 0         | 0         | 0        | 0         | 0         | 0        | 0       | 0        | 0        | 1       | 0        | 0       | 0        | 0       | 0        | 0       | 0       | 0        |
| Olsenella         | 2              | 40             | 0         | 0         | 0        | 0         | 0         | 0        | 0       | 0        | 0        | 0       | 0        | 0       | 0        | 0       | 0        | 0       | 0       | 0        |
| Opitutus          | 2              | 67             | 0         | 0         | 0        | 0         | 0         | 0        | 0       | 0        | 0        | 1       | 0        | 0       | 0        | 0       | 0        | 0       | 0       | 0        |
| Orientia          | 1              | 21             | 0         | 0         | 0        | 0         | 0         | 0        | 0       | 0        | 0        | 0       | 0        | 0       | 0        | 0       | 0        | 0       | 0       | 0        |
| Ornithobacterium  | 1              | 11             | 0         | 0         | 0        | 0         | 0         | 0        | 0       | 0        | 0        | 0       | 0        | 0       | 0        | 0       | 0        | 0       | 0       | 0        |
| Oscillatoria      | 1              | 16             | 0         | 0         | 0        | 0         | 0         | 0        | 0       | 0        | 0        | 0       | 0        | 0       | 0        | 0       | 0        | 0       | 0       | 0        |
| Oscillatoriales   | 1              | 2              | 0         | 0         | 0        | 0         | 0         | 0        | 0       | 0        | 0        | 0       | 0        | 0       | 0        | 0       | 0        | 0       | 0       | 0        |
| Oscillibacter     | 1              | 20             | 0         | 0         | 0        | 0         | 0         | 0        | 0       | 0        | 0        | 0       | 0        | 0       | 0        | 0       | 0        | 0       | 0       | 0        |
| Owenweeksia       | 1              | 15             | 0         | 0         | 0        | 0         | 0         | 0        | 0       | 0        | 0        | 0       | 0        | 0       | 0        | 0       | 0        | 0       | 0       | 0        |
| Oxalobacteraceae  | 1              | 4              | 0         | 0         | 0        | 0         | 0         | 0        | 0       | 0        | 0        | 0       | 0        | 0       | 0        | 0       | 0        | 0       | 0       | 0        |
| Paenibacillus     | 2              | 152            | 0         | 1         | 0        | 0         | 0         | 0        | 0       | 0        | 0        | 1       | 0        | 0       | 0        | 1       | 0        | 0       | 1       | 0        |
| Paludibacter      | 2              | 67             | 0         | 1         | 0        | 0         | 0         | 1        | 0       | 0        | 0        | 0       | 0        | 0       | 0        | 0       | 0        | 0       | 0       | 0        |
| Pandoraea         | 1              | 18             | 0         | 0         | 0        | 0         | 0         | 0        | 0       | 0        | 0        | 0       | 0        | 0       | 0        | 0       | 0        | 1       | 0       | 0        |
| Pannonibacter     | 1              | 3              | 0         | 0         | 0        | 0         | 0         | 0        | 0       | 0        | 0        | 0       | 0        | 0       | 0        | 0       | 0        | 0       | 0       | 0        |

| Genus              | Cluster Number | Protein Counts | 1.14.14.1 | 1.14.99.- | 1.17.3.2 | 1.17.99.1 | 1.17.99.2 | 1.18.6.1 | 1.2.1.- | 1.2.1.10 | 1.2.1.28 | 1.2.1.3 | 1.2.1.39 | 1.2.1.5 | 1.2.1.65 | 1.2.7.1 | 1.2.99.2 | 1.3.1.- | 1.3.1.2 | 1.3.1.25 |
|--------------------|----------------|----------------|-----------|-----------|----------|-----------|-----------|----------|---------|----------|----------|---------|----------|---------|----------|---------|----------|---------|---------|----------|
| Pantholops         | 1              | 23             | 0         | 0         | 0        | 0         | 0         | 0        | 0       | 0        | 0        | 0       | 0        | 0       | 0        | 0       | 0        | 0       | 0       | 0        |
| Pantoea            | 2              | 181            | 0         | 1         | 0        | 0         | 0         | 1        | 0       | 1        | 0        | 1       | 0        | 0       | 0        | 0       | 1        | 0       | 0       | 0        |
| Parabacteroides    | 2              | 64             | 0         | 0         | 0        | 0         | 0         | 0        | 0       | 0        | 0        | 0       | 0        | 0       | 0        | 0       | 0        | 0       | 1       | 0        |
| Parachlamydia      | 1              | 11             | 0         | 0         | 0        | 0         | 0         | 0        | 0       | 0        | 0        | 0       | 0        | 0       | 0        | 0       | 0        | 0       | 0       | 0        |
| Paracoccus         | 2              | 169            | 0         | 0         | 0        | 0         | 0         | 0        | 0       | 0        | 0        | 1       | 0        | 0       | 0        | 0       | 0        | 0       | 0       | 1        |
| Parvibaculum       | 3              | 117            | 0         | 0         | 0        | 0         | 0         | 0        | 0       | 0        | 0        | 1       | 0        | 0       | 0        | 0       | 1        | 0       | 0       | 0        |
| Parvularcula       | 2              | 72             | 0         | 1         | 0        | 0         | 0         | 0        | 0       | 0        | 0        | 1       | 0        | 0       | 0        | 0       | 0        | 0       | 0       | 0        |
| Pasteurella        | 2              | 85             | 0         | 0         | 0        | 0         | 0         | 0        | 0       | 1        | 0        | 0       | 0        | 0       | 0        | 0       | 0        | 0       | 0       | 0        |
| Pasteurellaceae    | 1              | 2              | 0         | 0         | 0        | 0         | 0         | 0        | 0       | 0        | 0        | 0       | 0        | 0       | 0        | 0       | 0        | 0       | 0       | 0        |
| Pectobacterium     | 1              | 44             | 0         | 0         | 0        | 0         | 0         | 0        | 0       | 0        | 0        | 0       | 0        | 0       | 0        | 0       | 0        | 0       | 0       | 0        |
| Pediococcus        | 1              | 43             | 0         | 0         | 0        | 0         | 0         | 0        | 0       | 0        | 0        | 0       | 0        | 0       | 0        | 0       | 0        | 0       | 0       | 0        |
| Pedobacter         | 2              | 88             | 0         | 1         | 0        | 0         | 0         | 0        | 0       | 0        | 0        | 1       | 0        | 0       | 0        | 0       | 0        | 0       | 0       | 0        |
| Pelagibaca         | 1              | 10             | 0         | 0         | 0        | 0         | 0         | 0        | 0       | 0        | 0        | 0       | 0        | 0       | 0        | 0       | 0        | 0       | 0       | 0        |
| Pelagibacterium    | 1              | 39             | 0         | 0         | 0        | 0         | 0         | 0        | 0       | 0        | 0        | 0       | 0        | 0       | 0        | 0       | 0        | 0       | 0       | 0        |
| Pelobacter         | 2              | 85             | 0         | 0         | 0        | 0         | 0         | 1        | 0       | 1        | 0        | 1       | 0        | 0       | 0        | 1       | 1        | 0       | 0       | 0        |
| Pelodictyon        | 2              | 62             | 0         | 1         | 0        | 0         | 0         | 1        | 0       | 0        | 0        | 1       | 0        | 0       | 0        | 0       | 0        | 0       | 0       | 0        |
| Pelosinus          | 1              | 1              | 0         | 0         | 0        | 0         | 0         | 0        | 0       | 0        | 0        | 0       | 0        | 0       | 0        | 0       | 0        | 0       | 0       | 0        |
| Pelotomaculum      | 2              | 60             | 0         | 0         | 0        | 0         | 0         | 0        | 0       | 1        | 0        | 0       | 0        | 0       | 0        | 0       | 0        | 0       | 0       | 0        |
| Peptostreptococcus | 1              | 1              | 0         | 0         | 0        | 0         | 0         | 0        | 0       | 0        | 0        | 0       | 0        | 0       | 0        | 0       | 0        | 0       | 0       | 0        |
| Persephonella      | 2              | 55             | 0         | 0         | 0        | 0         | 0         | 0        | 0       | 0        | 0        | 0       | 0        | 0       | 0        | 1       | 0        | 0       | 0       | 0        |
| Petrogona          | 2              | 72             | 0         | 0         | 0        | 0         | 0         | 0        | 0       | 0        | 0        | 0       | 0        | 0       | 0        | 1       | 0        | 0       | 0       | 0        |
| Phaeobacter        | 2              | 55             | 0         | 0         | 0        | 0         | 0         | 0        | 0       | 0        | 0        | 0       | 0        | 0       | 0        | 0       | 1        | 0       | 1       | 0        |
| Phenylobacterium   | 3              | 103            | 0         | 0         | 0        | 0         | 0         | 0        | 0       | 0        | 0        | 1       | 0        | 0       | 0        | 0       | 0        | 0       | 0       | 0        |
| Photobacterium     | 2              | 119            | 0         | 0         | 0        | 0         | 0         | 0        | 0       | 1        | 0        | 1       | 0        | 0       | 0        | 0       | 0        | 1       | 0       | 0        |
| Photorhabdus       | 2              | 149            | 0         | 1         | 0        | 0         | 0         | 0        | 0       | 0        | 0        | 1       | 1        | 0       | 0        | 0       | 0        | 1       | 0       | 0        |
| Phycisphaera       | 1              | 9              | 0         | 0         | 0        | 0         | 0         | 0        | 0       | 0        | 0        | 0       | 0        | 0       | 0        | 0       | 0        | 0       | 0       | 0        |
| Phyllobacterium    | 1              | 6              | 0         | 0         | 0        | 0         | 0         | 0        | 0       | 0        | 0        | 0       | 0        | 0       | 0        | 0       | 0        | 0       | 0       | 0        |
| Picrophilus        | 1              | 15             | 0         | 0         | 0        | 0         | 0         | 0        | 0       | 0        | 0        | 0       | 0        | 0       | 0        | 0       | 0        | 0       | 0       | 0        |
| Pirellula          | 2              | 85             | 0         | 1         | 0        | 0         | 0         | 0        | 0       | 0        | 0        | 1       | 0        | 0       | 0        | 0       | 0        | 0       | 0       | 0        |
| Planctomyces       | 2              | 93             | 0         | 1         | 0        | 0         | 0         | 0        | 0       | 0        | 0        | 1       | 0        | 0       | 0        | 0       | 0        | 0       | 0       | 0        |
| Plautia            | 1              | 17             | 0         | 0         | 0        | 0         | 0         | 0        | 0       | 0        | 0        | 0       | 0        | 0       | 0        | 0       | 0        | 0       | 0       | 0        |
| Plesiomonas        | 1              | 4              | 0         | 0         | 0        | 0         | 0         | 0        | 0       | 1        | 0        | 0       | 0        | 0       | 0        | 0       | 0        | 0       | 0       | 0        |
| Pleurocapsa        | 1              | 23             | 0         | 0         | 0        | 0         | 0         | 0        | 0       | 0        | 0        | 0       | 0        | 0       | 0        | 0       | 0        | 0       | 0       | 0        |
| Polaribacter       | 2              | 74             | 0         | 1         | 0        | 0         | 0         | 0        | 0       | 0        | 0        | 1       | 0        | 0       | 0        | 0       | 0        | 0       | 0       | 0        |
| Polaromonas        | 3              | 238            | 0         | 1         | 0        | 1         | 0         | 1        | 0       | 1        | 1        | 1       | 0        | 0       | 0        | 0       | 1        | 1       | 1       | 1        |
| Polymorphum        | 3              | 173            | 0         | 0         | 0        | 0         | 0         | 0        | 0       | 1        | 0        | 1       | 0        | 0       | 0        | 0       | 1        | 1       | 1       | 0        |
| Polynucleobacter   | 1              | 19             | 0         | 0         | 0        | 0         | 0         | 0        | 0       | 0        | 0        | 0       | 0        | 0       | 0        | 0       | 0        | 0       | 0       | 0        |
| Ponticaulis        | 1              | 1              | 0         | 0         | 0        | 0         | 0         | 0        | 0       | 0        | 0        | 0       | 0        | 0       | 0        | 0       | 0        | 0       | 0       | 0        |
| Porphyromonas      | 2              | 63             | 0         | 0         | 0        | 0         | 0         | 0        | 0       | 0        | 0        | 0       | 0        | 0       | 0        | 0       | 0        | 0       | 0       | 0        |
| Prevotella         | 1              | 65             | 0         | 0         | 0        | 0         | 0         | 0        | 0       | 0        | 0        | 0       | 0        | 0       | 0        | 0       | 0        | 1       | 1       | 0        |
| Prochlorococcus    | 2              | 68             | 0         | 1         | 0        | 0         | 0         | 0        | 0       | 0        | 0        | 1       | 0        | 0       | 0        | 0       | 0        | 0       | 0       | 0        |
| Propionibacterium  | 1              | 62             | 0         | 0         | 0        | 0         | 0         | 0        | 0       | 0        | 0        | 0       | 0        | 0       | 0        | 0       | 0        | 0       | 0       | 0        |
| Prosthecochloris   | 1              | 16             | 0         | 0         | 0        | 0         | 0         | 1        | 0       | 0        | 0        | 0       | 0        | 0       | 0        | 0       | 0        | 0       | 0       | 0        |
| Proteobacteria     | 1              | 19             | 0         | 0         | 0        | 0         | 0         | 0        | 0       | 1        | 0        | 0       | 0        | 0       | 0        | 0       | 0        | 0       | 0       | 0        |
| Proteus            | 2              | 113            | 0         | 0         | 0        | 0         | 0         | 0        | 0       | 0        | 0        | 1       | 0        | 0       | 0        | 0       | 0        | 0       | 0       | 0        |
| Providencia        | 1              | 38             | 0         | 0         | 0        | 0         | 0         | 0        | 0       | 0        | 0        | 0       | 0        | 0       | 0        | 0       | 0        | 0       | 0       | 0        |
| Pseudaminobacter   | 1              | 10             | 0         | 0         | 0        | 0         | 0         | 0        | 0       | 0        | 0        | 0       | 0        | 0       | 0        | 0       | 0        | 0       | 1       | 0        |
| Pseudanabaena      | 1              | 11             | 0         | 0         | 0        | 0         | 0         | 0        | 0       | 0        | 0        | 0       | 0        | 0       | 0        | 0       | 0        | 0       | 0       | 0        |
| Pseudoalteromonas  | 2              | 188            | 0         | 0         | 0        | 1         | 0         | 0        | 0       | 1        | 0        | 1       | 0        | 0       | 0        | 0       | 0        | 0       | 0       | 0        |
| Pseudochrobactrum  | 1              | 7              | 0         | 0         | 0        | 0         | 0         | 0        | 0       | 0        | 0        | 1       | 0        | 0       | 0        | 0       | 0        | 0       | 0       | 0        |
| Pseudogulbenkiania | 1              | 40             | 0         | 0         | 0        | 0         | 0         | 0        | 0       | 0        | 0        | 0       | 0        | 0       | 0        | 0       | 0        | 0       | 0       | 0        |
| pseudomallei       | 3              | 131            | 0         | 0         | 0        | 0         | 0         | 0        | 0       | 0        | 0        | 1       | 1        | 0       | 0        | 0       | 0        | 0       | 0       | 0        |

| Genus                   | Cluster Number | Protein Counts | 1.14.14.1 | 1.14.99.- | 1.17.3.2 | 1.17.99.1 | 1.17.99.2 | 1.18.6.1 | 1.2.1.- | 1.2.1.10 | 1.2.1.28 | 1.2.1.3 | 1.2.1.39 | 1.2.1.5 | 1.2.1.65 | 1.2.7.1 | 1.2.99.2 | 1.3.1.- | 1.3.1.2 | 1.3.1.25 |
|-------------------------|----------------|----------------|-----------|-----------|----------|-----------|-----------|----------|---------|----------|----------|---------|----------|---------|----------|---------|----------|---------|---------|----------|
| Pseudomonas             | 3              | 381            | 0         | 1         | 0        | 0         | 0         | 1        | 1       | 1        | 1        | 1       | 1        | 0       | 0        | 0       | 0        | 1       | 1       | 1        |
| Pseudonocardia          | 3              | 180            | 0         | 0         | 0        | 0         | 0         | 0        | 0       | 1        | 0        | 1       | 0        | 0       | 0        | 0       | 1        | 0       | 0       | 0        |
| Pseudorhodobacter       | 1              | 4              | 0         | 0         | 0        | 0         | 0         | 0        | 0       | 0        | 0        | 0       | 0        | 0       | 0        | 0       | 0        | 0       | 0       | 0        |
| Pseudovibrio            | 1              | 33             | 0         | 0         | 0        | 0         | 0         | 0        | 0       | 0        | 0        | 0       | 0        | 0       | 0        | 0       | 0        | 0       | 0       | 0        |
| Pseudoxanthomonas       | 2              | 124            | 0         | 0         | 0        | 0         | 0         | 0        | 0       | 1        | 0        | 1       | 0        | 0       | 0        | 0       | 0        | 0       | 0       | 0        |
| Psychrobacter           | 2              | 124            | 0         | 0         | 0        | 0         | 0         | 0        | 0       | 0        | 0        | 1       | 0        | 0       | 0        | 0       | 0        | 0       | 0       | 1        |
| Psychroflexus           | 1              | 22             | 0         | 0         | 0        | 0         | 0         | 0        | 0       | 0        | 0        | 0       | 0        | 0       | 0        | 0       | 0        | 0       | 0       | 0        |
| Psychromonas            | 2              | 110            | 0         | 0         | 0        | 0         | 0         | 0        | 0       | 0        | 0        | 1       | 0        | 0       | 0        | 0       | 0        | 0       | 0       | 0        |
| Pusillimonas            | 3              | 111            | 0         | 0         | 0        | 0         | 0         | 0        | 0       | 1        | 0        | 1       | 0        | 0       | 0        | 0       | 0        | 0       | 0       | 0        |
| Pyrobaculum             | 1              | 15             | 0         | 0         | 0        | 0         | 0         | 0        | 0       | 0        | 0        | 0       | 0        | 0       | 0        | 0       | 0        | 0       | 0       | 0        |
| Pyrococcus              | 1              | 10             | 0         | 0         | 0        | 0         | 0         | 0        | 0       | 0        | 0        | 0       | 0        | 0       | 0        | 0       | 0        | 0       | 0       | 0        |
| Pyrolobus               | 1              | 4              | 0         | 0         | 0        | 0         | 0         | 0        | 0       | 0        | 0        | 0       | 0        | 0       | 0        | 0       | 0        | 0       | 0       | 0        |
| Rahnella                | 2              | 143            | 0         | 0         | 0        | 0         | 0         | 0        | 0       | 0        | 0        | 1       | 0        | 0       | 0        | 0       | 0        | 0       | 0       | 0        |
| Ralstonia               | 3              | 332            | 0         | 1         | 0        | 0         | 0         | 0        | 0       | 1        | 1        | 1       | 0        | 0       | 0        | 0       | 1        | 1       | 1       | 1        |
| Ramlibacter             | 1              | 35             | 0         | 0         | 0        | 0         | 0         | 0        | 0       | 0        | 0        | 0       | 0        | 0       | 0        | 0       | 0        | 0       | 0       | 0        |
| Raoultella              | 2              | 139            | 0         | 0         | 0        | 0         | 0         | 1        | 0       | 1        | 0        | 1       | 1        | 0       | 0        | 0       | 0        | 0       | 0       | 0        |
| Raphidiopsis            | 1              | 5              | 0         | 0         | 0        | 0         | 0         | 0        | 0       | 0        | 0        | 0       | 0        | 0       | 0        | 0       | 0        | 0       | 0       | 0        |
| Reinekea                | 1              | 2              | 0         | 0         | 0        | 0         | 0         | 0        | 0       | 0        | 0        | 0       | 0        | 0       | 0        | 0       | 0        | 0       | 0       | 0        |
| Renibacterium           | 2              | 67             | 0         | 0         | 0        | 0         | 0         | 0        | 0       | 0        | 0        | 1       | 0        | 0       | 0        | 0       | 0        | 0       | 0       | 0        |
| Rhizobiaceae            | 1              | 3              | 0         | 0         | 0        | 0         | 0         | 0        | 0       | 0        | 0        | 0       | 0        | 0       | 0        | 0       | 0        | 0       | 0       | 0        |
| Rhizobiales             | 1              | 6              | 0         | 0         | 0        | 0         | 0         | 0        | 0       | 0        | 0        | 0       | 0        | 0       | 0        | 0       | 1        | 0       | 0       | 0        |
| Rhizobium               | 3              | 257            | 0         | 0         | 0        | 0         | 0         | 1        | 0       | 0        | 0        | 1       | 0        | 0       | 0        | 0       | 1        | 1       | 1       | 0        |
| Rhizobium/Agrobacterium | 2              | 87             | 0         | 0         | 0        | 0         | 0         | 0        | 0       | 0        | 0        | 1       | 0        | 0       | 0        | 0       | 1        | 0       | 1       | 0        |
| Rhodanobacter           | 1              | 21             | 0         | 0         | 0        | 0         | 0         | 0        | 0       | 0        | 0        | 0       | 0        | 0       | 0        | 0       | 0        | 0       | 0       | 0        |
| Rhodobacter             | 3              | 175            | 0         | 1         | 0        | 0         | 0         | 1        | 0       | 0        | 0        | 1       | 0        | 0       | 0        | 0       | 1        | 0       | 1       | 0        |
| Rhodobacteraceae        | 1              | 21             | 0         | 0         | 0        | 0         | 0         | 0        | 0       | 0        | 0        | 0       | 0        | 0       | 0        | 0       | 0        | 0       | 0       | 0        |
| Rhodobacterales         | 1              | 34             | 0         | 0         | 0        | 0         | 0         | 0        | 0       | 0        | 0        | 0       | 0        | 0       | 0        | 0       | 0        | 0       | 1       | 0        |
| Rhodococcus             | 2              | 292            | 0         | 1         | 0        | 1         | 0         | 0        | 0       | 1        | 1        | 1       | 0        | 0       | 0        | 0       | 1        | 1       | 0       | 1        |
| Rhodocyclaceae          | 1              | 7              | 0         | 0         | 0        | 0         | 0         | 1        | 0       | 0        | 0        | 0       | 0        | 0       | 0        | 0       | 0        | 0       | 0       | 0        |
| Rhodoferax              | 3              | 144            | 0         | 0         | 0        | 0         | 0         | 0        | 0       | 1        | 0        | 1       | 0        | 0       | 0        | 1       | 0        | 0       | 0       | 0        |
| Rhodomicrobium          | 2              | 103            | 0         | 1         | 0        | 0         | 0         | 1        | 0       | 0        | 0        | 1       | 0        | 0       | 0        | 0       | 0        | 0       | 0       | 0        |
| Rhodopirellula          | 2              | 87             | 0         | 1         | 0        | 0         | 0         | 0        | 0       | 0        | 0        | 1       | 0        | 0       | 0        | 0       | 0        | 0       | 0       | 0        |
| Rhodopseudomonas        | 3              | 246            | 0         | 1         | 0        | 0         | 0         | 1        | 0       | 0        | 0        | 1       | 0        | 0       | 0        | 1       | 1        | 0       | 0       | 0        |
| Rhodospirillum          | 2              | 121            | 0         | 1         | 0        | 0         | 0         | 1        | 0       | 0        | 0        | 1       | 0        | 0       | 0        | 0       | 1        | 0       | 0       | 0        |
| Rhodothermus            | 2              | 76             | 0         | 1         | 0        | 0         | 0         | 0        | 0       | 0        | 0        | 1       | 0        | 0       | 0        | 1       | 1        | 0       | 0       | 0        |
| Rhodovulum              | 1              | 4              | 0         | 0         | 0        | 0         | 0         | 1        | 0       | 0        | 0        | 0       | 0        | 0       | 0        | 0       | 0        | 0       | 0       | 0        |
| Richelia                | 1              | 2              | 0         | 0         | 0        | 0         | 0         | 0        | 0       | 0        | 0        | 0       | 0        | 0       | 0        | 0       | 0        | 0       | 0       | 0        |
| Rickettsia              | 2              | 43             | 0         | 0         | 0        | 0         | 0         | 0        | 0       | 0        | 0        | 0       | 0        | 0       | 0        | 0       | 0        | 0       | 0       | 0        |
| Rickettsiaceae          | 1              | 5              | 0         | 0         | 0        | 0         | 0         | 0        | 0       | 0        | 0        | 0       | 0        | 0       | 0        | 0       | 0        | 0       | 0       | 0        |
| Riemerella              | 2              | 61             | 0         | 0         | 0        | 0         | 0         | 0        | 0       | 0        | 0        | 1       | 0        | 0       | 0        | 0       | 0        | 0       | 0       | 0        |
| Rivularia               | 1              | 18             | 0         | 0         | 0        | 0         | 0         | 0        | 0       | 0        | 0        | 0       | 0        | 0       | 0        | 0       | 0        | 0       | 0       | 0        |
| Robiginitalea           | 2              | 83             | 0         | 1         | 0        | 0         | 0         | 0        | 0       | 0        | 0        | 0       | 0        | 0       | 0        | 0       | 0        | 0       | 0       | 0        |
| Roseburia               | 2              | 58             | 0         | 0         | 0        | 0         | 0         | 0        | 0       | 0        | 0        | 0       | 0        | 0       | 0        | 1       | 0        | 0       | 0       | 0        |
| Roseibium               | 1              | 3              | 0         | 0         | 0        | 0         | 0         | 0        | 0       | 0        | 0        | 0       | 0        | 0       | 0        | 0       | 0        | 0       | 0       | 0        |
| Roseiflexus             | 3              | 100            | 0         | 1         | 0        | 0         | 0         | 1        | 1       | 1        | 0        | 1       | 0        | 1       | 0        | 0       | 1        | 0       | 0       | 0        |
| Roseobacter             | 2              | 149            | 0         | 1         | 0        | 0         | 0         | 0        | 0       | 0        | 0        | 1       | 0        | 0       | 0        | 0       | 1        | 0       | 1       | 0        |
| Roseomonas              | 1              | 2              | 0         | 0         | 0        | 0         | 0         | 0        | 0       | 0        | 0        | 0       | 0        | 0       | 0        | 0       | 0        | 0       | 0       | 0        |
| Roseovarius             | 1              | 15             | 0         | 0         | 0        | 0         | 0         | 0        | 0       | 0        | 0        | 0       | 0        | 0       | 0        | 0       | 0        | 0       | 0       | 0        |
| Rothia                  | 1              | 44             | 0         | 0         | 0        | 0         | 0         | 0        | 0       | 0        | 0        | 1       | 0        | 0       | 0        | 0       | 0        | 0       | 0       | 0        |
| Rubrivivax              | 1              | 24             | 0         | 0         | 0        | 0         | 0         | 1        | 0       | 0        | 0        | 0       | 0        | 0       | 0        | 0       | 0        | 0       | 0       | 0        |
| Rubroacter              | 3              | 117            | 0         | 0         | 0        | 0         | 0         | 0        | 0       | 0        | 0        | 1       | 0        | 0       | 0        | 1       | 1        | 0       | 0       | 0        |
| Ruegeria                | 2              | 189            | 0         | 0         | 0        | 0         | 0         | 0        | 0       | 0        | 0        | 1       | 0        | 0       | 0        | 0       | 1        | 0       | 1       | 0        |

| Genus             | Cluster Number | Protein Counts | 1.14.14.1 | 1.14.99.- | 1.17.3.2 | 1.17.99.1 | 1.17.99.2 | 1.18.6.1 | 1.2.1.- | 1.2.1.10 | 1.2.1.28 | 1.2.1.3 | 1.2.1.39 | 1.2.1.5 | 1.2.1.65 | 1.2.7.1 | 1.2.99.2 | 1.3.1.- | 1.3.1.2 | 1.3.1.25 |
|-------------------|----------------|----------------|-----------|-----------|----------|-----------|-----------|----------|---------|----------|----------|---------|----------|---------|----------|---------|----------|---------|---------|----------|
| Ruminococcaceae   | 1              | 2              | 0         | 0         | 0        | 0         | 0         | 0        | 0       | 0        | 0        | 0       | 0        | 0       | 0        | 0       | 0        | 0       | 0       | 0        |
| Ruminococcus      | 2              | 101            | 0         | 0         | 0        | 0         | 0         | 1        | 0       | 1        | 0        | 1       | 0        | 0       | 0        | 0       | 1        | 0       | 1       | 0        |
| Runella           | 1              | 26             | 0         | 0         | 0        | 0         | 0         | 0        | 0       | 0        | 0        | 0       | 0        | 0       | 0        | 0       | 0        | 0       | 0       | 0        |
| Saccharomonospora | 2              | 132            | 0         | 1         | 0        | 0         | 0         | 0        | 0       | 0        | 1        | 1       | 0        | 0       | 0        | 0       | 1        | 0       | 0       | 1        |
| Saccharophagus    | 2              | 81             | 0         | 0         | 0        | 0         | 0         | 0        | 0       | 0        | 0        | 0       | 0        | 0       | 0        | 0       | 0        | 0       | 0       | 0        |
| Saccharopolyspora | 3              | 194            | 0         | 0         | 0        | 0         | 0         | 0        | 0       | 0        | 1        | 1       | 0        | 0       | 0        | 0       | 1        | 0       | 0       | 1        |
| Saccharothrix     | 1              | 32             | 0         | 0         | 0        | 0         | 0         | 0        | 0       | 0        | 0        | 0       | 0        | 0       | 0        | 0       | 0        | 0       | 0       | 0        |
| Sagittula         | 1              | 10             | 0         | 0         | 0        | 0         | 0         | 0        | 0       | 0        | 0        | 0       | 0        | 0       | 0        | 0       | 1        | 0       | 0       | 0        |
| Salinibacter      | 2              | 77             | 0         | 1         | 0        | 0         | 0         | 0        | 0       | 0        | 0        | 1       | 0        | 0       | 0        | 0       | 0        | 0       | 0       | 0        |
| Salinimonas       | 1              | 1              | 0         | 0         | 0        | 0         | 0         | 0        | 0       | 0        | 0        | 0       | 0        | 0       | 0        | 0       | 0        | 0       | 0       | 0        |
| Salinispora       | 3              | 127            | 0         | 1         | 0        | 0         | 0         | 0        | 0       | 1        | 0        | 1       | 0        | 0       | 0        | 0       | 0        | 0       | 0       | 0        |
| Salinivibrio      | 1              | 2              | 0         | 0         | 0        | 0         | 0         | 0        | 0       | 0        | 0        | 0       | 0        | 0       | 0        | 0       | 0        | 0       | 0       | 0        |
| Salmonella        | 2              | 151            | 0         | 0         | 0        | 0         | 0         | 0        | 0       | 1        | 0        | 1       | 0        | 0       | 0        | 0       | 0        | 0       | 1       | 0        |
| Sanguibacter      | 2              | 73             | 0         | 0         | 0        | 0         | 0         | 0        | 0       | 0        | 0        | 1       | 0        | 0       | 0        | 0       | 0        | 0       | 0       | 0        |
| Saprospira        | 1              | 13             | 0         | 0         | 0        | 0         | 0         | 0        | 0       | 0        | 0        | 0       | 0        | 0       | 0        | 0       | 0        | 0       | 0       | 0        |
| Scardovia         | 1              | 1              | 0         | 0         | 0        | 0         | 0         | 0        | 0       | 0        | 0        | 0       | 0        | 0       | 0        | 0       | 0        | 0       | 0       | 0        |
| Scytonema         | 1              | 10             | 0         | 0         | 0        | 0         | 0         | 1        | 0       | 0        | 0        | 0       | 0        | 0       | 0        | 0       | 0        | 0       | 0       | 0        |
| Sebaldella        | 2              | 69             | 0         | 0         | 0        | 0         | 0         | 0        | 0       | 0        | 0        | 1       | 0        | 0       | 0        | 0       | 0        | 0       | 0       | 0        |
| Segniliparus      | 2              | 85             | 0         | 0         | 0        | 0         | 0         | 0        | 0       | 1        | 0        | 1       | 0        | 0       | 0        | 0       | 0        | 0       | 0       | 0        |
| Selenomonas       | 2              | 57             | 0         | 0         | 0        | 0         | 0         | 0        | 0       | 0        | 0        | 0       | 0        | 0       | 0        | 0       | 1        | 0       | 0       | 0        |
| Serinicoccus      | 1              | 1              | 0         | 0         | 0        | 0         | 0         | 0        | 0       | 0        | 0        | 0       | 0        | 0       | 0        | 0       | 0        | 0       | 0       | 0        |
| Serratia          | 2              | 186            | 0         | 0         | 0        | 0         | 0         | 0        | 1       | 1        | 0        | 1       | 1        | 0       | 0        | 0       | 0        | 0       | 0       | 0        |
| Shewanella        | 3              | 214            | 0         | 1         | 0        | 1         | 0         | 0        | 1       | 1        | 0        | 1       | 0        | 0       | 0        | 0       | 1        | 1       | 0       | 0        |
| Shigella          | 2              | 172            | 0         | 0         | 0        | 0         | 0         | 0        | 1       | 1        | 0        | 1       | 1        | 0       | 0        | 0       | 0        | 1       | 1       | 0        |
| Shinella          | 1              | 2              | 0         | 0         | 0        | 0         | 0         | 0        | 0       | 0        | 0        | 0       | 0        | 0       | 0        | 0       | 1        | 0       | 0       | 0        |
| Sideroxydans      | 2              | 81             | 0         | 0         | 0        | 0         | 0         | 1        | 0       | 0        | 0        | 0       | 0        | 0       | 0        | 0       | 0        | 0       | 0       | 0        |
| Silicibacter      | 2              | 105            | 0         | 0         | 0        | 0         | 0         | 0        | 0       | 0        | 0        | 1       | 0        | 0       | 0        | 0       | 1        | 0       | 1       | 0        |
| Simiduia          | 1              | 18             | 0         | 0         | 0        | 0         | 0         | 0        | 0       | 0        | 0        | 0       | 0        | 0       | 0        | 0       | 0        | 0       | 0       | 0        |
| Simkania          | 1              | 6              | 0         | 0         | 0        | 0         | 0         | 0        | 0       | 0        | 0        | 0       | 0        | 0       | 0        | 0       | 0        | 0       | 0       | 0        |
| Simonsiella       | 1              | 2              | 0         | 0         | 0        | 0         | 0         | 0        | 0       | 0        | 0        | 0       | 0        | 0       | 0        | 0       | 0        | 0       | 0       | 0        |
| Singulisphaera    | 1              | 18             | 0         | 0         | 0        | 0         | 0         | 0        | 0       | 0        | 0        | 0       | 0        | 0       | 0        | 0       | 0        | 0       | 0       | 0        |
| Sinorhizobium     | 3              | 207            | 0         | 1         | 0        | 0         | 0         | 1        | 0       | 0        | 0        | 1       | 1        | 0       | 0        | 0       | 1        | 0       | 1       | 0        |
| Slackia           | 2              | 46             | 0         | 0         | 0        | 0         | 0         | 0        | 0       | 1        | 0        | 1       | 0        | 0       | 0        | 0       | 0        | 0       | 0       | 0        |
| Smaragdicoccus    | 1              | 3              | 0         | 0         | 0        | 0         | 0         | 0        | 0       | 0        | 0        | 0       | 0        | 0       | 0        | 0       | 0        | 0       | 0       | 0        |
| Sodalis           | 2              | 71             | 0         | 0         | 0        | 0         | 0         | 0        | 0       | 0        | 0        | 0       | 0        | 0       | 0        | 0       | 0        | 0       | 0       | 0        |
| Solibacillus      | 1              | 23             | 0         | 0         | 0        | 0         | 0         | 0        | 0       | 0        | 0        | 1       | 0        | 0       | 0        | 0       | 0        | 0       | 0       | 0        |
| Solitaea          | 1              | 13             | 0         | 0         | 0        | 0         | 0         | 0        | 0       | 0        | 0        | 0       | 0        | 0       | 0        | 0       | 0        | 0       | 0       | 0        |
| Sorangium         | 3              | 115            | 0         | 1         | 0        | 0         | 0         | 0        | 0       | 0        | 0        | 1       | 0        | 0       | 0        | 0       | 0        | 0       | 1       | 0        |
| Sphaerobacter     | 2              | 100            | 0         | 0         | 0        | 0         | 0         | 0        | 0       | 0        | 0        | 1       | 0        | 0       | 0        | 0       | 1        | 0       | 0       | 0        |
| Sphaerochaeta     | 1              | 42             | 0         | 0         | 0        | 0         | 0         | 0        | 0       | 1        | 0        | 1       | 0        | 0       | 0        | 0       | 0        | 0       | 0       | 0        |
| Sphingobacterium  | 3              | 85             | 0         | 0         | 0        | 0         | 0         | 0        | 0       | 0        | 0        | 1       | 0        | 0       | 0        | 0       | 0        | 0       | 0       | 0        |
| Sphingobium       | 1              | 179            | 0         | 1         | 0        | 0         | 0         | 0        | 0       | 1        | 0        | 1       | 0        | 0       | 0        | 0       | 0        | 0       | 0       | 0        |
| Sphingomonadaceae | 1              | 15             | 0         | 0         | 0        | 0         | 0         | 0        | 0       | 0        | 0        | 1       | 0        | 0       | 0        | 0       | 0        | 0       | 0       | 0        |
| Sphingomonas      | 2              | 220            | 0         | 0         | 0        | 1         | 0         | 0        | 0       | 1        | 0        | 1       | 0        | 0       | 0        | 0       | 1        | 0       | 0       | 1        |
| Sphingopyxis      | 3              | 99             | 0         | 1         | 0        | 0         | 0         | 0        | 0       | 0        | 0        | 1       | 0        | 0       | 0        | 0       | 0        | 0       | 0       | 0        |
| Spirochaeta       | 2              | 103            | 0         | 0         | 0        | 0         | 0         | 1        | 0       | 1        | 0        | 1       | 0        | 0       | 0        | 0       | 1        | 0       | 0       | 0        |
| Spiroplasma       | 1              | 6              | 0         | 0         | 0        | 0         | 0         | 0        | 0       | 0        | 0        | 0       | 0        | 0       | 0        | 0       | 0        | 0       | 0       | 0        |
| Spirosoma         | 2              | 107            | 0         | 1         | 0        | 0         | 0         | 0        | 0       | 0        | 0        | 1       | 0        | 0       | 0        | 0       | 0        | 1       | 0       | 0        |
| Stackebrandtia    | 2              | 110            | 0         | 0         | 0        | 0         | 0         | 0        | 0       | 0        | 0        | 1       | 0        | 0       | 0        | 0       | 0        | 0       | 0       | 0        |
| Stanieria         | 1              | 17             | 0         | 0         | 0        | 0         | 0         | 0        | 0       | 0        | 0        | 0       | 0        | 0       | 0        | 0       | 0        | 0       | 0       | 0        |
| Staphylococcus    | 2              | 108            | 0         | 1         | 0        | 0         | 0         | 0        | 0       | 1        | 0        | 1       | 0        | 0       | 0        | 0       | 0        | 0       | 0       | 0        |
| Staphylothermus   | 1              | 12             | 0         | 0         | 0        | 0         | 0         | 0        | 0       | 0        | 0        | 0       | 0        | 0       | 0        | 0       | 0        | 0       | 0       | 0        |



| Genus                  | Cluster Number | Protein Counts | 1.14.14.1 | 1.14.99.- | 1.17.3.2 | 1.17.99.1 | 1.17.99.2 | 1.18.6.1 | 1.2.1.- | 1.2.1.10 | 1.2.1.28 | 1.2.1.3 | 1.2.1.39 | 1.2.1.5 | 1.2.1.65 | 1.2.7.1 | 1.2.99.2 | 1.3.1.- | 1.3.1.2 | 1.3.1.25 |
|------------------------|----------------|----------------|-----------|-----------|----------|-----------|-----------|----------|---------|----------|----------|---------|----------|---------|----------|---------|----------|---------|---------|----------|
| Stappia                | 1              | 2              | 0         | 0         | 0        | 0         | 0         | 0        | 0       | 0        | 0        | 0       | 0        | 0       | 0        | 0       | 0        | 0       | 0       | 0        |
| Starkeya               | 3              | 134            | 0         | 0         | 0        | 0         | 0         | 0        | 0       | 0        | 0        | 1       | 0        | 0       | 0        | 0       | 1        | 0       | 0       | 0        |
| Stenotrophomonas       | 3              | 104            | 0         | 1         | 0        | 0         | 0         | 0        | 0       | 0        | 1        | 1       | 0        | 0       | 0        | 0       | 0        | 0       | 0       | 0        |
| Stigmatella            | 3              | 129            | 0         | 1         | 0        | 0         | 0         | 0        | 0       | 0        | 0        | 1       | 0        | 0       | 0        | 0       | 0        | 0       | 1       | 0        |
| Streptobacillus        | 1              | 38             | 0         | 0         | 0        | 0         | 0         | 0        | 0       | 1        | 0        | 0       | 0        | 0       | 0        | 0       | 0        | 0       | 0       | 0        |
| Streptococcus          | 2              | 121            | 0         | 0         | 0        | 0         | 0         | 0        | 0       | 1        | 0        | 0       | 0        | 0       | 0        | 0       | 0        | 0       | 0       | 0        |
| Streptomyces           | 2              | 253            | 0         | 1         | 0        | 0         | 0         | 0        | 0       | 1        | 1        | 1       | 0        | 0       | 0        | 0       | 1        | 1       | 0       | 0        |
| Streptosporangium      | 3              | 148            | 0         | 1         | 0        | 0         | 0         | 0        | 0       | 1        | 0        | 1       | 0        | 0       | 0        | 0       | 1        | 0       | 0       | 0        |
| Strigomonas            | 1              | 2              | 0         | 0         | 0        | 0         | 0         | 0        | 0       | 0        | 0        | 0       | 0        | 0       | 0        | 0       | 0        | 0       | 0       | 0        |
| Sulfitobacter          | 1              | 10             | 0         | 0         | 0        | 0         | 0         | 0        | 0       | 0        | 0        | 0       | 0        | 0       | 0        | 0       | 0        | 0       | 0       | 0        |
| Sulfobacillus          | 1              | 30             | 0         | 0         | 0        | 0         | 0         | 0        | 0       | 0        | 0        | 0       | 0        | 0       | 0        | 0       | 0        | 0       | 0       | 0        |
| Sulfolobus             | 1              | 23             | 0         | 0         | 0        | 0         | 0         | 0        | 0       | 0        | 0        | 0       | 0        | 0       | 0        | 0       | 0        | 0       | 0       | 0        |
| Sulfuricurvum          | 2              | 67             | 0         | 0         | 0        | 1         | 0         | 1        | 0       | 0        | 0        | 1       | 0        | 0       | 0        | 1       | 0        | 0       | 0       | 0        |
| Sulfurihydrogenibium   | 2              | 55             | 0         | 0         | 0        | 0         | 0         | 0        | 0       | 0        | 0        | 1       | 0        | 0       | 0        | 1       | 0        | 0       | 0       | 0        |
| Sulfurimonas           | 2              | 60             | 0         | 0         | 0        | 0         | 0         | 0        | 0       | 0        | 0        | 1       | 0        | 0       | 0        | 1       | 0        | 0       | 0       | 0        |
| Sulfurospirillum       | 1              | 48             | 0         | 0         | 0        | 0         | 0         | 0        | 0       | 1        | 0        | 1       | 0        | 0       | 0        | 0       | 0        | 0       | 0       | 0        |
| Sulfurovum             | 2              | 48             | 0         | 0         | 0        | 0         | 0         | 0        | 0       | 0        | 0        | 0       | 0        | 0       | 0        | 1       | 0        | 0       | 0       | 0        |
| Symbiobacterium        | 2              | 68             | 0         | 0         | 0        | 0         | 0         | 0        | 0       | 0        | 0        | 0       | 0        | 0       | 0        | 1       | 0        | 0       | 0       | 0        |
| Synechococcus          | 1              | 34             | 0         | 0         | 0        | 0         | 0         | 0        | 0       | 0        | 0        | 0       | 0        | 0       | 0        | 0       | 0        | 0       | 0       | 0        |
| Synechocystis          | 1              | 40             | 0         | 1         | 0        | 0         | 0         | 0        | 0       | 0        | 0        | 1       | 0        | 0       | 0        | 0       | 0        | 0       | 0       | 0        |
| Synergistetes          | 1              | 27             | 0         | 0         | 0        | 0         | 0         | 0        | 0       | 0        | 0        | 0       | 0        | 0       | 0        | 0       | 0        | 0       | 0       | 0        |
| Syntrophobacter        | 2              | 101            | 0         | 1         | 0        | 0         | 0         | 1        | 0       | 0        | 0        | 1       | 0        | 0       | 0        | 1       | 1        | 0       | 0       | 0        |
| Syntrophobotulus       | 2              | 71             | 0         | 0         | 0        | 0         | 0         | 1        | 0       | 0        | 0        | 1       | 0        | 0       | 0        | 0       | 0        | 0       | 1       | 0        |
| Syntrophomonas         | 2              | 58             | 0         | 0         | 0        | 0         | 0         | 1        | 0       | 0        | 0        | 0       | 0        | 0       | 0        | 1       | 0        | 0       | 0       | 0        |
| Syntrophothermus       | 2              | 60             | 0         | 0         | 0        | 0         | 0         | 1        | 0       | 0        | 0        | 0       | 0        | 0       | 0        | 0       | 0        | 0       | 0       | 0        |
| Syntrophus             | 2              | 66             | 0         | 0         | 0        | 0         | 0         | 0        | 0       | 0        | 0        | 1       | 0        | 0       | 0        | 1       | 0        | 0       | 0       | 0        |
| Tannerella             | 1              | 8              | 0         | 0         | 0        | 0         | 0         | 0        | 0       | 0        | 0        | 0       | 0        | 0       | 0        | 0       | 0        | 0       | 0       | 0        |
| Taylorella             | 1              | 43             | 0         | 0         | 0        | 0         | 0         | 0        | 0       | 0        | 0        | 0       | 0        | 0       | 0        | 0       | 0        | 0       | 0       | 0        |
| Tepidanaerobacter      | 2              | 55             | 0         | 0         | 0        | 0         | 0         | 0        | 0       | 0        | 0        | 0       | 0        | 0       | 0        | 1       | 1        | 0       | 0       | 0        |
| Teredinibacter         | 2              | 109            | 0         | 0         | 0        | 0         | 0         | 1        | 0       | 1        | 0        | 0       | 0        | 0       | 0        | 0       | 0        | 0       | 0       | 0        |
| Terrabacter            | 1              | 1              | 0         | 0         | 0        | 0         | 0         | 0        | 0       | 0        | 0        | 0       | 0        | 0       | 0        | 0       | 0        | 0       | 0       | 0        |
| Terriglobus            | 2              | 83             | 0         | 0         | 0        | 0         | 0         | 0        | 0       | 0        | 0        | 0       | 0        | 0       | 0        | 0       | 0        | 0       | 0       | 0        |
| Tetragenococcus        | 1              | 12             | 0         | 0         | 0        | 0         | 0         | 0        | 0       | 0        | 0        | 0       | 0        | 0       | 0        | 0       | 0        | 0       | 0       | 0        |
| Thalassiobium          | 1              | 11             | 0         | 0         | 0        | 0         | 0         | 0        | 0       | 0        | 0        | 0       | 0        | 0       | 0        | 0       | 0        | 0       | 0       | 0        |
| Thalassobacter         | 1              | 9              | 0         | 0         | 0        | 0         | 0         | 0        | 0       | 0        | 0        | 0       | 0        | 0       | 0        | 0       | 0        | 0       | 0       | 0        |
| Thalassolituus         | 1              | 12             | 0         | 0         | 0        | 0         | 0         | 0        | 0       | 0        | 0        | 0       | 0        | 0       | 0        | 0       | 0        | 0       | 0       | 0        |
| Thalassospira          | 1              | 2              | 0         | 0         | 0        | 0         | 0         | 0        | 0       | 0        | 0        | 0       | 0        | 0       | 0        | 0       | 0        | 0       | 0       | 0        |
| Thauera                | 1              | 111            | 0         | 0         | 0        | 0         | 0         | 0        | 0       | 1        | 0        | 1       | 0        | 0       | 0        | 1       | 0        | 0       | 0       | 1        |
| Thermacetogenium       | 1              | 7              | 0         | 0         | 0        | 0         | 0         | 0        | 0       | 0        | 0        | 0       | 0        | 0       | 0        | 0       | 0        | 0       | 0       | 0        |
| Thermaerobacter        | 2              | 79             | 0         | 1         | 0        | 0         | 0         | 0        | 0       | 1        | 0        | 1       | 0        | 0       | 0        | 0       | 1        | 0       | 0       | 0        |
| Thermanaerovibrio      | 2              | 58             | 0         | 0         | 0        | 0         | 0         | 0        | 0       | 0        | 0        | 0       | 0        | 0       | 0        | 0       | 0        | 0       | 0       | 0        |
| Thermincola            | 2              | 62             | 0         | 0         | 0        | 0         | 0         | 1        | 0       | 1        | 0        | 0       | 0        | 0       | 0        | 0       | 1        | 0       | 0       | 0        |
| Thermoanaerobacter     | 2              | 76             | 0         | 0         | 0        | 0         | 0         | 0        | 0       | 0        | 0        | 0       | 0        | 0       | 0        | 0       | 1        | 0       | 0       | 0        |
| Thermoanaerobacterium  | 2              | 64             | 0         | 0         | 0        | 0         | 0         | 1        | 0       | 0        | 0        | 0       | 0        | 0       | 0        | 0       | 0        | 0       | 0       | 0        |
| Thermobacillus         | 1              | 11             | 0         | 0         | 0        | 0         | 0         | 0        | 0       | 0        | 0        | 0       | 0        | 0       | 0        | 0       | 0        | 0       | 0       | 0        |
| Thermobaculum          | 2              | 62             | 0         | 1         | 0        | 0         | 0         | 0        | 0       | 0        | 0        | 1       | 0        | 0       | 0        | 0       | 1        | 0       | 0       | 0        |
| Thermobifida           | 2              | 72             | 0         | 1         | 0        | 0         | 0         | 0        | 0       | 0        | 0        | 1       | 0        | 0       | 0        | 0       | 1        | 0       | 0       | 0        |
| Thermobispora          | 2              | 109            | 0         | 0         | 0        | 0         | 0         | 0        | 0       | 0        | 0        | 1       | 0        | 0       | 0        | 0       | 1        | 0       | 0       | 0        |
| Thermococcus           | 1              | 13             | 0         | 0         | 0        | 0         | 0         | 0        | 0       | 0        | 0        | 0       | 0        | 0       | 0        | 0       | 0        | 0       | 0       | 0        |
| Thermocrinis           | 2              | 60             | 0         | 0         | 0        | 0         | 0         | 1        | 0       | 0        | 0        | 1       | 0        | 0       | 0        | 1       | 0        | 0       | 0       | 0        |
| Thermodesulfator       | 1              | 10             | 0         | 0         | 0        | 0         | 0         | 0        | 0       | 0        | 0        | 0       | 0        | 0       | 0        | 0       | 0        | 0       | 0       | 0        |
| Thermodesulfobacterium | 1              | 9              | 0         | 0         | 0        | 0         | 0         | 0        | 0       | 0        | 0        | 0       | 0        | 0       | 0        | 0       | 0        | 0       | 0       | 0        |

| Genus                | Cluster Number | Protein Counts | 1.14.14.1 | 1.14.99.- | 1.17.3.2 | 1.17.99.1 | 1.17.99.2 | 1.18.6.1 | 1.2.1.- | 1.2.1.10 | 1.2.1.28 | 1.2.1.3 | 1.2.1.39 | 1.2.1.5 | 1.2.1.65 | 1.2.7.1 | 1.2.99.2 | 1.3.1.- | 1.3.1.2 | 1.3.1.25 |
|----------------------|----------------|----------------|-----------|-----------|----------|-----------|-----------|----------|---------|----------|----------|---------|----------|---------|----------|---------|----------|---------|---------|----------|
| Thermodesulfobium    | 1              | 13             | 0         | 0         | 0        | 0         | 0         | 0        | 0       | 0        | 0        | 0       | 0        | 0       | 0        | 0       | 0        | 0       | 0       | 0        |
| Thermodesulfovibrio  | 2              | 60             | 0         | 0         | 0        | 0         | 0         | 1        | 0       | 0        | 0        | 0       | 0        | 0       | 0        | 1       | 0        | 0       | 0       | 0        |
| Thermofilum          | 1              | 9              | 0         | 0         | 0        | 0         | 0         | 0        | 0       | 0        | 0        | 0       | 0        | 0       | 0        | 0       | 0        | 0       | 0       | 0        |
| Thermogladus         | 1              | 7              | 0         | 0         | 0        | 0         | 0         | 0        | 0       | 0        | 0        | 0       | 0        | 0       | 0        | 0       | 0        | 0       | 0       | 0        |
| Thermomicrobium      | 2              | 92             | 0         | 1         | 0        | 0         | 0         | 0        | 0       | 1        | 0        | 1       | 0        | 0       | 0        | 0       | 1        | 1       | 0       | 0        |
| Thermomonospora      | 2              | 125            | 0         | 0         | 0        | 0         | 0         | 0        | 0       | 1        | 0        | 1       | 0        | 0       | 0        | 0       | 1        | 0       | 0       | 0        |
| Thermoplasma         | 1              | 11             | 0         | 0         | 0        | 0         | 0         | 0        | 0       | 0        | 0        | 0       | 0        | 0       | 0        | 0       | 0        | 0       | 0       | 0        |
| Thermoplasmatales    | 1              | 6              | 0         | 0         | 0        | 0         | 0         | 0        | 0       | 0        | 0        | 0       | 0        | 0       | 0        | 0       | 0        | 0       | 0       | 0        |
| Thermoproteus        | 1              | 12             | 0         | 0         | 0        | 0         | 0         | 0        | 0       | 0        | 0        | 0       | 0        | 0       | 0        | 0       | 0        | 0       | 0       | 0        |
| Thermosediminibacter | 2              | 64             | 0         | 0         | 0        | 0         | 0         | 0        | 0       | 1        | 0        | 0       | 0        | 0       | 0        | 1       | 1        | 0       | 0       | 0        |
| Thermosipho          | 2              | 70             | 0         | 0         | 0        | 0         | 0         | 0        | 0       | 0        | 0        | 1       | 0        | 0       | 0        | 1       | 0        | 0       | 0       | 0        |
| Thermosphaera        | 1              | 10             | 0         | 0         | 0        | 0         | 0         | 0        | 0       | 0        | 0        | 0       | 0        | 0       | 0        | 0       | 0        | 0       | 0       | 0        |
| Thermosynechococcus  | 1              | 6              | 0         | 0         | 0        | 0         | 0         | 0        | 0       | 0        | 0        | 0       | 0        | 0       | 0        | 0       | 0        | 0       | 0       | 0        |
| Thermotoga           | 2              | 80             | 0         | 0         | 0        | 0         | 0         | 0        | 0       | 0        | 0        | 1       | 0        | 0       | 0        | 1       | 0        | 0       | 0       | 0        |
| Thermovibrio         | 2              | 58             | 0         | 0         | 0        | 0         | 0         | 0        | 0       | 0        | 0        | 1       | 0        | 0       | 0        | 1       | 0        | 0       | 0       | 0        |
| Thermovirga          | 1              | 9              | 0         | 0         | 0        | 0         | 0         | 0        | 0       | 0        | 0        | 0       | 0        | 0       | 0        | 0       | 0        | 0       | 0       | 0        |
| Thermus              | 2              | 107            | 0         | 0         | 0        | 0         | 0         | 0        | 1       | 1        | 0        | 1       | 0        | 0       | 0        | 0       | 0        | 0       | 0       | 0        |
| Thioalkalimicrobium  | 1              | 4              | 0         | 0         | 0        | 0         | 0         | 0        | 0       | 0        | 0        | 0       | 0        | 0       | 0        | 0       | 0        | 0       | 0       | 0        |
| Thioalkalivibrio     | 2              | 91             | 0         | 0         | 0        | 0         | 0         | 0        | 0       | 0        | 0        | 0       | 0        | 0       | 0        | 0       | 0        | 0       | 0       | 0        |
| Thiobaca             | 1              | 2              | 0         | 0         | 0        | 0         | 0         | 0        | 0       | 0        | 0        | 0       | 0        | 0       | 0        | 0       | 0        | 0       | 0       | 0        |
| Thiobacillus         | 2              | 67             | 0         | 0         | 0        | 0         | 0         | 0        | 0       | 0        | 0        | 0       | 0        | 0       | 0        | 0       | 0        | 0       | 0       | 0        |
| Thiocapsa            | 1              | 2              | 0         | 0         | 0        | 0         | 0         | 0        | 0       | 0        | 0        | 0       | 0        | 0       | 0        | 0       | 0        | 0       | 0       | 0        |
| Thiocystis           | 1              | 11             | 0         | 0         | 0        | 0         | 0         | 0        | 0       | 0        | 0        | 0       | 0        | 0       | 0        | 0       | 0        | 0       | 0       | 0        |
| Thioflavococcus      | 1              | 13             | 0         | 0         | 0        | 0         | 0         | 0        | 0       | 0        | 0        | 0       | 0        | 0       | 0        | 0       | 0        | 0       | 0       | 0        |
| Thiomicrospira       | 2              | 50             | 0         | 0         | 0        | 0         | 0         | 0        | 0       | 0        | 0        | 0       | 0        | 0       | 0        | 0       | 0        | 0       | 0       | 0        |
| Thiomonas            | 2              | 85             | 0         | 0         | 0        | 0         | 0         | 0        | 0       | 0        | 0        | 1       | 0        | 0       | 0        | 0       | 0        | 0       | 0       | 0        |
| Thiorhodococcus      | 1              | 2              | 0         | 0         | 0        | 0         | 0         | 0        | 0       | 0        | 0        | 0       | 0        | 0       | 0        | 0       | 0        | 0       | 0       | 0        |
| Thiothrix            | 1              | 2              | 0         | 0         | 0        | 0         | 0         | 0        | 0       | 0        | 0        | 1       | 0        | 0       | 0        | 0       | 0        | 0       | 0       | 0        |
| Tistrella            | 1              | 42             | 0         | 0         | 0        | 0         | 0         | 0        | 0       | 0        | 0        | 0       | 0        | 0       | 0        | 0       | 0        | 0       | 0       | 0        |
| Tolumonas            | 2              | 100            | 0         | 0         | 0        | 0         | 0         | 1        | 0       | 0        | 0        | 0       | 0        | 0       | 0        | 0       | 0        | 0       | 0       | 0        |
| Transposon           | 1              | 2              | 0         | 0         | 0        | 0         | 0         | 0        | 0       | 0        | 0        | 0       | 0        | 0       | 0        | 0       | 0        | 0       | 0       | 0        |
| Treponema            | 1              | 63             | 0         | 0         | 0        | 0         | 0         | 0        | 0       | 0        | 0        | 1       | 0        | 0       | 0        | 0       | 0        | 0       | 0       | 0        |
| Trichodesmium        | 2              | 71             | 0         | 1         | 0        | 0         | 0         | 1        | 0       | 0        | 0        | 1       | 0        | 0       | 0        | 0       | 0        | 0       | 0       | 0        |
| Trichormus           | 1              | 12             | 0         | 0         | 0        | 0         | 0         | 0        | 0       | 0        | 0        | 0       | 0        | 0       | 0        | 0       | 0        | 0       | 0       | 0        |
| Tropheryma           | 2              | 22             | 0         | 0         | 0        | 0         | 0         | 0        | 0       | 0        | 0        | 0       | 0        | 0       | 0        | 0       | 0        | 0       | 0       | 0        |
| Truepera             | 2              | 104            | 0         | 1         | 0        | 0         | 0         | 0        | 1       | 0        | 0        | 1       | 0        | 0       | 0        | 0       | 0        | 0       | 1       | 0        |
| Tsukamurella         | 2              | 123            | 0         | 1         | 0        | 0         | 0         | 0        | 0       | 1        | 0        | 1       | 0        | 0       | 0        | 0       | 0        | 0       | 0       | 0        |
| Turneriella          | 1              | 16             | 0         | 0         | 0        | 0         | 0         | 0        | 0       | 0        | 0        | 0       | 0        | 0       | 0        | 0       | 0        | 0       | 0       | 0        |
| Uliginosibacterium   | 1              | 2              | 0         | 0         | 0        | 0         | 0         | 0        | 0       | 0        | 0        | 0       | 0        | 0       | 0        | 0       | 0        | 0       | 0       | 0        |
| Ureaplasma           | 1              | 24             | 0         | 0         | 0        | 0         | 0         | 0        | 0       | 0        | 0        | 0       | 0        | 0       | 0        | 0       | 0        | 0       | 0       | 0        |
| Ureibacillus         | 1              | 2              | 0         | 0         | 0        | 0         | 0         | 0        | 0       | 0        | 0        | 0       | 0        | 0       | 0        | 0       | 0        | 0       | 0       | 0        |
| Variovorax           | 3              | 187            | 0         | 0         | 0        | 0         | 0         | 0        | 0       | 0        | 0        | 1       | 0        | 0       | 0        | 0       | 1        | 0       | 0       | 0        |
| Veillonella          | 1              | 54             | 0         | 0         | 0        | 0         | 0         | 0        | 0       | 0        | 0        | 0       | 0        | 0       | 0        | 0       | 0        | 0       | 0       | 0        |
| Verminephrobacter    | 3              | 188            | 0         | 0         | 0        | 0         | 0         | 0        | 0       | 1        | 0        | 1       | 0        | 0       | 0        | 0       | 1        | 0       | 1       | 0        |
| Verrucosispora       | 3              | 126            | 0         | 1         | 0        | 0         | 0         | 0        | 0       | 1        | 1        | 1       | 0        | 0       | 0        | 0       | 0        | 0       | 0       | 0        |
| Vibrio               | 2              | 195            | 0         | 1         | 0        | 0         | 0         | 0        | 1       | 1        | 0        | 1       | 0        | 0       | 0        | 0       | 0        | 1       | 0       | 0        |
| Vibrionales          | 1              | 46             | 0         | 0         | 0        | 0         | 0         | 0        | 0       | 0        | 0        | 0       | 0        | 0       | 0        | 0       | 0        | 0       | 0       | 0        |
| Vitreoscilla         | 1              | 1              | 0         | 0         | 0        | 0         | 0         | 0        | 0       | 0        | 0        | 0       | 0        | 0       | 0        | 0       | 0        | 0       | 0       | 0        |
| Vulcanisaeta         | 1              | 14             | 0         | 0         | 0        | 0         | 0         | 0        | 0       | 0        | 0        | 0       | 0        | 0       | 0        | 0       | 0        | 0       | 0       | 0        |
| Waddlia              | 2              | 68             | 0         | 0         | 0        | 0         | 0         | 0        | 0       | 0        | 0        | 0       | 0        | 0       | 0        | 0       | 0        | 0       | 0       | 0        |
| Wautersia            | 1              | 2              | 0         | 0         | 0        | 0         | 0         | 0        | 0       | 0        | 0        | 0       | 0        | 0       | 0        | 0       | 0        | 0       | 0       | 0        |
| Weeksella            | 2              | 65             | 0         | 0         | 0        | 0         | 0         | 0        | 0       | 0        | 0        | 1       | 0        | 0       | 0        | 0       | 0        | 0       | 0       | 0        |

| Genus             | Cluster Number | Protein Counts | 1.14.14.1 | 1.14.99.- | 1.17.3.2 | 1.17.99.1 | 1.17.99.2 | 1.18.6.1 | 1.2.1.- | 1.2.1.10 | 1.2.1.28 | 1.2.1.3 | 1.2.1.39 | 1.2.1.5 | 1.2.1.65 | 1.2.7.1 | 1.2.99.2 | 1.3.1.- | 1.3.1.2 | 1.3.1.25 |
|-------------------|----------------|----------------|-----------|-----------|----------|-----------|-----------|----------|---------|----------|----------|---------|----------|---------|----------|---------|----------|---------|---------|----------|
| Weissella         | 1              | 14             | 0         | 0         | 0        | 0         | 0         | 0        | 0       | 0        | 0        | 0       | 0        | 0       | 0        | 0       | 0        | 0       | 0       | 0        |
| Wenxinia          | 1              | 2              | 0         | 0         | 0        | 0         | 0         | 0        | 0       | 0        | 0        | 0       | 0        | 0       | 0        | 0       | 0        | 0       | 0       | 0        |
| Wigglesworthia    | 1              | 29             | 0         | 0         | 0        | 0         | 0         | 0        | 0       | 0        | 0        | 0       | 0        | 0       | 0        | 0       | 0        | 0       | 0       | 0        |
| Wolbachia         | 1              | 32             | 0         | 0         | 0        | 0         | 0         | 0        | 0       | 0        | 0        | 0       | 0        | 0       | 0        | 0       | 0        | 0       | 0       | 0        |
| Wolinella         | 2              | 51             | 0         | 0         | 0        | 0         | 0         | 1        | 0       | 0        | 0        | 0       | 0        | 0       | 0        | 1       | 0        | 0       | 0       | 0        |
| Xanthobacter      | 3              | 176            | 0         | 1         | 0        | 0         | 0         | 1        | 0       | 1        | 0        | 1       | 0        | 0       | 0        | 0       | 1        | 0       | 0       | 1        |
| Xanthobacteraceae | 1              | 4              | 0         | 0         | 0        | 0         | 0         | 0        | 0       | 0        | 0        | 0       | 0        | 0       | 0        | 0       | 0        | 0       | 0       | 0        |
| Xanthomonadaceae  | 1              | 39             | 0         | 0         | 0        | 0         | 0         | 0        | 0       | 0        | 0        | 0       | 0        | 0       | 0        | 0       | 0        | 0       | 0       | 0        |
| Xanthomonas       | 2              | 162            | 0         | 1         | 0        | 0         | 0         | 0        | 0       | 0        | 1        | 1       | 0        | 0       | 0        | 0       | 0        | 1       | 0       | 0        |
| Xenorhabdus       | 2              | 127            | 0         | 0         | 0        | 0         | 0         | 0        | 0       | 1        | 0        | 1       | 1        | 0       | 0        | 0       | 0        | 0       | 0       | 0        |
| Xylanimonas       | 2              | 66             | 0         | 0         | 0        | 0         | 0         | 0        | 0       | 1        | 0        | 1       | 0        | 0       | 0        | 0       | 0        | 0       | 0       | 0        |
| Xylella           | 2              | 52             | 0         | 0         | 0        | 0         | 0         | 0        | 0       | 0        | 0        | 0       | 0        | 0       | 0        | 0       | 0        | 0       | 0       | 0        |
| Yersinia          | 2              | 145            | 0         | 0         | 0        | 0         | 0         | 0        | 0       | 1        | 0        | 1       | 0        | 0       | 0        | 0       | 0        | 0       | 0       | 0        |
| Yokenella         | 2              | 61             | 0         | 0         | 0        | 0         | 0         | 0        | 0       | 0        | 0        | 1       | 0        | 0       | 0        | 0       | 0        | 0       | 0       | 0        |
| Zobellia          | 1              | 28             | 0         | 0         | 0        | 0         | 0         | 0        | 0       | 0        | 0        | 0       | 0        | 0       | 0        | 0       | 0        | 0       | 0       | 0        |
| Zunongwangia      | 2              | 98             | 0         | 1         | 0        | 0         | 0         | 0        | 0       | 0        | 0        | 1       | 0        | 0       | 0        | 0       | 0        | 0       | 0       | 0        |
| Zymomonas         | 2              | 67             | 0         | 1         | 0        | 0         | 0         | 1        | 0       | 0        | 0        | 0       | 0        | 0       | 0        | 0       | 0        | 0       | 0       | 0        |
| Zymophilus        | 1              | 2              | 0         | 0         | 0        | 0         | 0         | 0        | 0       | 0        | 0        | 0       | 0        | 0       | 0        | 0       | 0        | 0       | 0       | 0        |

| Genus               | Cluster Number | Protein Counts | 1.3.1.32 | 1.3.1.56 | 1.3.99.- | 1.4.3.4 | 1.6.5.- | 1.7.1.- | 1.8.99.3 | 1.97.1.8 | 2.1.1.- | 2.1.1.67 | 2.3.1.- | 2.3.1.16 | 2.3.1.5 | 2.3.1.9 | 2.4.2.10 | 2.4.2.3 | 2.4.2.4 | 2.4.2.8 | 2.5.1.- | 2.5.1.18 |
|---------------------|----------------|----------------|----------|----------|----------|---------|---------|---------|----------|----------|---------|----------|---------|----------|---------|---------|----------|---------|---------|---------|---------|----------|
| Acaricomes          | 1              | 2              | 0        | 0        | 0        | 0       | 0       | 0       | 0        | 0        | 0       | 0        | 0       | 0        | 0       | 0       | 0        | 0       | 0       | 1       | 0       | 0        |
| Acaryochloris       | 2              | 88             | 0        | 0        | 0        | 0       | 0       | 0       | 0        | 0        | 1       | 0        | 1       | 0        | 0       | 1       | 1        | 1       | 0       | 0       | 1       | 1        |
| Acetivibrio         | 1              | 2              | 0        | 0        | 0        | 0       | 0       | 0       | 0        | 0        | 0       | 0        | 0       | 0        | 0       | 0       | 0        | 0       | 0       | 0       | 0       | 0        |
| Acetobacter         | 2              | 85             | 0        | 0        | 0        | 0       | 0       | 0       | 0        | 0        | 1       | 1        | 1       | 0        | 0       | 0       | 1        | 0       | 0       | 0       | 1       | 1        |
| Acetobacteraceae    | 1              | 2              | 0        | 0        | 0        | 0       | 0       | 0       | 0        | 0        | 0       | 0        | 0       | 0        | 0       | 0       | 0        | 0       | 0       | 0       | 0       | 0        |
| Acetobacterium      | 1              | 8              | 0        | 0        | 0        | 0       | 0       | 0       | 0        | 0        | 0       | 0        | 0       | 0        | 0       | 0       | 0        | 0       | 0       | 0       | 0       | 0        |
| Acetohalobium       | 2              | 79             | 0        | 0        | 0        | 0       | 1       | 0       | 0        | 0        | 1       | 0        | 1       | 1        | 0       | 0       | 1        | 0       | 0       | 1       | 1       | 0        |
| Acholeplasma        | 2              | 38             | 0        | 0        | 0        | 0       | 1       | 0       | 0        | 0        | 1       | 0        | 1       | 1        | 0       | 0       | 0        | 0       | 0       | 1       | 0       | 1        |
| Achromobacter       | 2              | 192            | 0        | 0        | 1        | 0       | 0       | 0       | 0        | 0        | 1       | 0        | 1       | 1        | 0       | 1       | 1        | 0       | 1       | 0       | 1       | 1        |
| Acidaminococcus     | 1              | 65             | 0        | 0        | 0        | 0       | 0       | 0       | 0        | 0        | 1       | 0        | 1       | 1        | 0       | 1       | 1        | 1       | 0       | 1       | 1       | 0        |
| Acidianus           | 1              | 9              | 0        | 0        | 0        | 0       | 0       | 0       | 0        | 0        | 0       | 0        | 0       | 0        | 0       | 0       | 0        | 0       | 0       | 0       | 0       | 0        |
| Acidilobus          | 1              | 8              | 0        | 0        | 0        | 0       | 0       | 0       | 0        | 0        | 0       | 0        | 0       | 0        | 0       | 0       | 0        | 0       | 0       | 0       | 0       | 0        |
| Acidimicrobium      | 2              | 58             | 0        | 0        | 0        | 0       | 0       | 0       | 0        | 0        | 1       | 0        | 1       | 0        | 0       | 1       | 1        | 0       | 0       | 1       | 1       | 0        |
| Acidiphilium        | 3              | 144            | 0        | 0        | 0        | 0       | 0       | 1       | 0        | 0        | 1       | 0        | 1       | 1        | 0       | 1       | 1        | 0       | 0       | 0       | 1       | 1        |
| Acidithiobacillus   | 2              | 70             | 0        | 0        | 0        | 0       | 0       | 1       | 0        | 0        | 1       | 0        | 1       | 0        | 0       | 0       | 1        | 0       | 0       | 1       | 1       | 1        |
| Acidobacterium      | 2              | 91             | 0        | 0        | 0        | 0       | 1       | 0       | 0        | 0        | 1       | 0        | 1       | 1        | 0       | 1       | 1        | 0       | 0       | 1       | 1       | 1        |
| Acidocella          | 1              | 2              | 0        | 0        | 0        | 0       | 0       | 0       | 0        | 0        | 0       | 0        | 0       | 0        | 0       | 0       | 0        | 0       | 0       | 0       | 0       | 0        |
| Acidothermus        | 2              | 68             | 0        | 0        | 0        | 0       | 0       | 0       | 0        | 0        | 1       | 0        | 1       | 1        | 0       | 1       | 1        | 0       | 0       | 1       | 1       | 0        |
| Acidovorax          | 3              | 217            | 0        | 0        | 0        | 0       | 0       | 1       | 0        | 0        | 1       | 0        | 1       | 1        | 0       | 1       | 1        | 0       | 1       | 0       | 1       | 1        |
| Aciduliprofundum    | 1              | 11             | 0        | 0        | 0        | 0       | 0       | 0       | 0        | 0        | 0       | 0        | 0       | 0        | 0       | 0       | 0        | 0       | 0       | 0       | 0       | 0        |
| Acinetobacter       | 3              | 188            | 0        | 0        | 0        | 0       | 0       | 1       | 0        | 0        | 1       | 1        | 1       | 1        | 0       | 1       | 1        | 0       | 0       | 1       | 1       | 1        |
| Actinobacillus      | 2              | 112            | 0        | 0        | 0        | 0       | 1       | 1       | 0        | 0        | 1       | 0        | 1       | 1        | 0       | 1       | 1        | 1       | 0       | 1       | 1       | 1        |
| Actinomadura        | 1              | 1              | 0        | 0        | 0        | 0       | 0       | 0       | 0        | 0        | 0       | 0        | 0       | 0        | 0       | 0       | 0        | 0       | 0       | 0       | 0       | 0        |
| Actinoplanes        | 1              | 52             | 0        | 0        | 0        | 0       | 0       | 0       | 0        | 0        | 0       | 0        | 0       | 0        | 0       | 0       | 0        | 0       | 0       | 0       | 0       | 0        |
| Actinopolyspora     | 1              | 2              | 0        | 0        | 0        | 0       | 0       | 0       | 0        | 0        | 1       | 0        | 0       | 0        | 0       | 0       | 0        | 0       | 0       | 0       | 0       | 0        |
| Actinosynnema       | 2              | 122            | 0        | 0        | 0        | 0       | 0       | 0       | 0        | 0        | 1       | 1        | 1       | 1        | 1       | 1       | 1        | 1       | 1       | 1       | 1       | 1        |
| Advenella           | 1              | 30             | 0        | 0        | 0        | 0       | 0       | 0       | 0        | 0        | 0       | 0        | 0       | 0        | 0       | 0       | 0        | 0       | 0       | 0       | 0       | 0        |
| Aequorivita         | 1              | 12             | 0        | 0        | 0        | 0       | 0       | 0       | 0        | 0        | 0       | 0        | 0       | 0        | 0       | 0       | 0        | 0       | 0       | 0       | 0       | 0        |
| Aerococcus          | 2              | 57             | 0        | 0        | 0        | 0       | 0       | 0       | 0        | 0        | 1       | 0        | 1       | 1        | 0       | 0       | 1        | 0       | 0       | 1       | 0       | 1        |
| Aeromonas           | 2              | 127            | 0        | 0        | 0        | 0       | 1       | 1       | 0        | 0        | 1       | 1        | 1       | 1        | 0       | 1       | 1        | 1       | 1       | 1       | 1       | 1        |
| Aeropyrum           | 1              | 13             | 0        | 0        | 0        | 0       | 0       | 0       | 0        | 0        | 0       | 0        | 0       | 0        | 0       | 0       | 0        | 0       | 0       | 0       | 0       | 0        |
| Afipia              | 1              | 54             | 0        | 0        | 0        | 0       | 0       | 1       | 0        | 0        | 1       | 0        | 1       | 1        | 0       | 1       | 0        | 0       | 0       | 0       | 1       | 1        |
| Aggregatibacter     | 1              | 81             | 0        | 0        | 0        | 0       | 1       | 0       | 0        | 0        | 1       | 0        | 1       | 0        | 0       | 0       | 1        | 1       | 0       | 1       | 1       | 0        |
| Agrobacterium       | 2              | 242            | 0        | 0        | 0        | 0       | 0       | 0       | 0        | 0        | 1       | 0        | 1       | 1        | 0       | 1       | 1        | 1       | 1       | 1       | 1       | 1        |
| Ahrensia            | 1              | 2              | 0        | 0        | 0        | 0       | 0       | 0       | 0        | 0        | 0       | 0        | 0       | 0        | 0       | 0       | 0        | 0       | 0       | 0       | 0       | 0        |
| Akkermansia         | 2              | 47             | 0        | 0        | 0        | 0       | 0       | 1       | 0        | 0        | 1       | 0        | 1       | 0        | 0       | 0       | 1        | 0       | 0       | 1       | 1       | 0        |
| Albidiferax         | 3              | 144            | 0        | 0        | 0        | 0       | 0       | 1       | 0        | 0        | 1       | 0        | 1       | 1        | 0       | 1       | 1        | 0       | 1       | 0       | 1       | 1        |
| Alcaligenes         | 1              | 21             | 0        | 0        | 0        | 0       | 0       | 0       | 0        | 0        | 0       | 0        | 0       | 1        | 0       | 0       | 0        | 0       | 0       | 0       | 0       | 0        |
| Alcanivorax         | 2              | 146            | 0        | 0        | 0        | 0       | 1       | 1       | 0        | 0        | 1       | 0        | 1       | 1        | 0       | 1       | 1        | 0       | 1       | 1       | 1       | 1        |
| Alicyclophilus      | 3              | 152            | 0        | 0        | 1        | 0       | 0       | 0       | 0        | 0        | 1       | 0        | 1       | 1        | 0       | 1       | 1        | 0       | 1       | 0       | 1       | 1        |
| Alicyclobacillus    | 2              | 91             | 0        | 0        | 0        | 0       | 0       | 1       | 0        | 0        | 1       | 0        | 1       | 1        | 0       | 1       | 1        | 0       | 0       | 1       | 1       | 0        |
| Aliivibrio          | 2              | 118            | 0        | 0        | 0        | 0       | 1       | 1       | 0        | 0        | 1       | 1        | 1       | 1        | 0       | 1       | 1        | 1       | 1       | 1       | 1       | 1        |
| Alishewanella       | 1              | 1              | 0        | 0        | 0        | 0       | 0       | 0       | 0        | 0        | 0       | 0        | 0       | 0        | 0       | 0       | 0        | 0       | 0       | 0       | 0       | 1        |
| Alistipes           | 1              | 52             | 0        | 0        | 0        | 0       | 1       | 0       | 0        | 0        | 1       | 0        | 1       | 0        | 0       | 0       | 1        | 0       | 0       | 1       | 1       | 0        |
| Alkalilimnicola     | 2              | 97             | 0        | 0        | 0        | 0       | 0       | 1       | 0        | 0        | 1       | 0        | 1       | 1        | 0       | 1       | 1        | 0       | 1       | 1       | 1       | 1        |
| Alkaliphilus        | 2              | 62             | 0        | 0        | 0        | 0       | 0       | 0       | 0        | 0        | 1       | 0        | 1       | 0        | 0       | 1       | 1        | 0       | 0       | 1       | 0       | 0        |
| Allochromatium      | 2              | 84             | 0        | 0        | 0        | 0       | 0       | 0       | 1        | 0        | 1       | 1        | 1       | 1        | 0       | 0       | 1        | 0       | 1       | 1       | 1       | 0        |
| Alphaproteobacteria | 1              | 3              | 0        | 0        | 0        | 0       | 0       | 0       | 0        | 0        | 0       | 0        | 0       | 0        | 0       | 0       | 0        | 0       | 1       | 0       | 0       | 0        |
| Alteromonadales     | 1              | 12             | 0        | 0        | 0        | 0       | 1       | 0       | 0        | 0        | 0       | 0        | 0       | 1        | 0       | 0       | 0        | 0       | 0       | 1       | 0       | 1        |
| Alteromonas         | 1              | 37             | 0        | 0        | 0        | 0       | 1       | 0       | 0        | 0        | 0       | 0        | 0       | 0        | 0       | 0       | 0        | 0       | 0       | 0       | 0       | 0        |
| Aminobacter         | 1              | 4              | 0        | 0        | 0        | 0       | 0       | 0       | 0        | 0        | 0       | 0        | 0       | 0        | 0       | 0       | 0        | 0       | 0       | 0       | 0       | 0        |
| Aminobacterium      | 2              | 59             | 0        | 0        | 0        | 0       | 0       | 0       | 0        | 0        | 1       | 0        | 1       | 0        | 0       | 1       | 1        | 0       | 0       | 1       | 1       | 0        |

| Genus            | Cluster Number | Protein Counts | 1.3.1.32 | 1.3.1.56 | 1.3.99.- | 1.4.3.4 | 1.6.5.- | 1.7.1.- | 1.8.99.3 | 1.97.1.8 | 2.1.1.- | 2.1.1.67 | 2.3.1.- | 2.3.1.16 | 2.3.1.5 | 2.3.1.9 | 2.4.2.10 | 2.4.2.3 | 2.4.2.4 | 2.4.2.8 | 2.5.1.- | 2.5.1.18 |
|------------------|----------------|----------------|----------|----------|----------|---------|---------|---------|----------|----------|---------|----------|---------|----------|---------|---------|----------|---------|---------|---------|---------|----------|
| Ammonifex        | 2              | 50             | 0        | 0        | 0        | 0       | 0       | 0       | 1        | 0        | 1       | 0        | 1       | 0        | 0       | 0       | 1        | 0       | 0       | 1       | 1       | 0        |
| Amphibacillus    | 1              | 13             | 0        | 0        | 0        | 0       | 0       | 0       | 0        | 0        | 1       | 0        | 0       | 0        | 0       | 0       | 0        | 0       | 0       | 0       | 0       | 0        |
| Amphritea        | 1              | 2              | 0        | 0        | 0        | 0       | 0       | 0       | 0        | 0        | 0       | 0        | 0       | 0        | 0       | 0       | 0        | 0       | 0       | 0       | 0       | 0        |
| Amycolatopsis    | 2              | 201            | 0        | 0        | 1        | 1       | 0       | 0       | 0        | 0        | 1       | 0        | 1       | 1        | 0       | 1       | 1        | 0       | 1       | 1       | 1       | 1        |
| Amycolobicoccus  | 1              | 43             | 0        | 0        | 0        | 0       | 0       | 0       | 0        | 0        | 0       | 0        | 0       | 0        | 0       | 0       | 0        | 0       | 0       | 0       | 0       | 0        |
| Anabaena         | 2              | 92             | 0        | 0        | 0        | 0       | 0       | 1       | 0        | 0        | 1       | 0        | 1       | 0        | 0       | 0       | 1        | 0       | 0       | 0       | 1       | 1        |
| Anaerobaculum    | 1              | 11             | 0        | 0        | 0        | 0       | 0       | 0       | 0        | 0        | 0       | 0        | 0       | 0        | 0       | 0       | 0        | 0       | 0       | 0       | 0       | 0        |
| Anaerococcus     | 2              | 46             | 0        | 0        | 0        | 0       | 1       | 0       | 0        | 0        | 1       | 0        | 1       | 1        | 0       | 0       | 1        | 1       | 0       | 1       | 0       | 0        |
| Anaerolinea      | 2              | 66             | 0        | 0        | 0        | 0       | 0       | 0       | 0        | 0        | 1       | 0        | 1       | 1        | 0       | 1       | 0        | 1       | 0       | 1       | 1       | 0        |
| Anaeromyxobacter | 3              | 117            | 0        | 0        | 0        | 1       | 0       | 1       | 0        | 0        | 1       | 0        | 1       | 1        | 0       | 1       | 1        | 0       | 0       | 1       | 1       | 1        |
| Anaerostipes     | 1              | 44             | 0        | 0        | 0        | 0       | 0       | 0       | 0        | 0        | 1       | 0        | 1       | 1        | 0       | 0       | 1        | 0       | 0       | 0       | 0       | 0        |
| Anaerotruncus    | 1              | 2              | 0        | 0        | 0        | 0       | 0       | 0       | 0        | 0        | 1       | 0        | 0       | 0        | 0       | 0       | 0        | 0       | 0       | 0       | 0       | 0        |
| Anaplasma        | 1              | 35             | 0        | 0        | 0        | 0       | 0       | 0       | 0        | 0        | 1       | 0        | 0       | 0        | 0       | 0       | 1        | 0       | 0       | 0       | 1       | 0        |
| Ancylobacter     | 1              | 3              | 0        | 0        | 0        | 0       | 0       | 0       | 0        | 0        | 0       | 0        | 0       | 0        | 0       | 0       | 0        | 0       | 0       | 0       | 0       | 0        |
| Aneurinibacillus | 1              | 1              | 0        | 0        | 0        | 0       | 0       | 0       | 0        | 0        | 0       | 0        | 0       | 0        | 0       | 0       | 0        | 0       | 0       | 0       | 0       | 0        |
| Angomonas        | 1              | 1              | 0        | 0        | 0        | 0       | 0       | 0       | 0        | 0        | 0       | 0        | 0       | 0        | 0       | 0       | 0        | 0       | 0       | 0       | 0       | 0        |
| Anoxybacillus    | 2              | 72             | 0        | 0        | 0        | 0       | 0       | 1       | 0        | 0        | 1       | 0        | 1       | 1        | 0       | 0       | 1        | 0       | 0       | 1       | 1       | 0        |
| Aquifex          | 2              | 45             | 0        | 0        | 0        | 0       | 0       | 1       | 0        | 0        | 1       | 0        | 1       | 0        | 0       | 0       | 1        | 0       | 0       | 1       | 1       | 0        |
| Aquimarina       | 1              | 2              | 0        | 0        | 0        | 0       | 0       | 0       | 0        | 0        | 0       | 0        | 0       | 0        | 0       | 1       | 0        | 0       | 0       | 0       | 0       | 0        |
| Arcanobacterium  | 2              | 45             | 0        | 0        | 1        | 0       | 0       | 0       | 0        | 0        | 1       | 0        | 1       | 0        | 0       | 0       | 1        | 0       | 1       | 0       | 0       | 0        |
| Archaeoglobus    | 1              | 14             | 0        | 0        | 0        | 0       | 0       | 0       | 0        | 0        | 0       | 0        | 0       | 0        | 0       | 0       | 0        | 0       | 0       | 0       | 0       | 0        |
| Arcobacter       | 2              | 101            | 0        | 0        | 0        | 0       | 0       | 1       | 0        | 0        | 1       | 0        | 1       | 0        | 0       | 1       | 1        | 0       | 0       | 0       | 0       | 0        |
| Aromatoleum      | 3              | 133            | 0        | 0        | 0        | 0       | 1       | 1       | 0        | 0        | 1       | 0        | 1       | 1        | 0       | 1       | 1        | 0       | 0       | 1       | 1       | 1        |
| Arsenophonus     | 1              | 4              | 0        | 0        | 0        | 0       | 1       | 0       | 0        | 0        | 0       | 0        | 0       | 0        | 0       | 0       | 0        | 0       | 0       | 0       | 0       | 0        |
| Arthrobacter     | 2              | 206            | 0        | 0        | 0        | 0       | 0       | 0       | 0        | 0        | 1       | 0        | 1       | 1        | 0       | 1       | 1        | 0       | 1       | 1       | 1       | 1        |
| Arthrospira      | 2              | 67             | 0        | 0        | 0        | 0       | 0       | 0       | 0        | 0        | 1       | 0        | 1       | 0        | 0       | 1       | 1        | 0       | 0       | 0       | 1       | 1        |
| Aster            | 1              | 10             | 0        | 0        | 0        | 0       | 0       | 0       | 0        | 0        | 1       | 0        | 0       | 0        | 0       | 0       | 0        | 0       | 0       | 0       | 0       | 0        |
| Asticcacaulis    | 2              | 103            | 0        | 0        | 0        | 0       | 0       | 0       | 0        | 0        | 1       | 0        | 1       | 1        | 0       | 1       | 1        | 0       | 0       | 1       | 1       | 1        |
| Atopobium        | 1              | 28             | 0        | 0        | 0        | 0       | 0       | 0       | 0        | 0        | 1       | 0        | 1       | 0        | 0       | 0       | 1        | 0       | 0       | 1       | 0       | 0        |
| Aurantimonas     | 1              | 2              | 0        | 0        | 0        | 0       | 0       | 0       | 0        | 0        | 0       | 0        | 0       | 0        | 0       | 0       | 0        | 0       | 0       | 0       | 0       | 0        |
| Avibacterium     | 1              | 17             | 0        | 0        | 0        | 0       | 1       | 0       | 0        | 0        | 1       | 0        | 0       | 0        | 0       | 0       | 0        | 0       | 0       | 0       | 0       | 0        |
| Azoarcus         | 3              | 172            | 0        | 0        | 0        | 0       | 0       | 1       | 0        | 0        | 1       | 0        | 1       | 1        | 1       | 1       | 1        | 0       | 0       | 1       | 1       | 1        |
| Azorhizobium     | 3              | 149            | 0        | 0        | 0        | 0       | 0       | 1       | 0        | 0        | 1       | 0        | 1       | 1        | 0       | 1       | 1        | 0       | 1       | 1       | 1       | 1        |
| Azorhizophilus   | 1              | 4              | 0        | 0        | 0        | 0       | 0       | 0       | 0        | 0        | 0       | 0        | 0       | 0        | 0       | 0       | 0        | 0       | 0       | 0       | 0       | 0        |
| Azospira         | 1              | 19             | 0        | 0        | 0        | 0       | 0       | 0       | 0        | 0        | 0       | 0        | 0       | 0        | 0       | 0       | 0        | 0       | 0       | 0       | 0       | 0        |
| Azospirillum     | 2              | 198            | 0        | 0        | 1        | 1       | 0       | 0       | 0        | 0        | 1       | 0        | 1       | 1        | 0       | 1       | 1        | 0       | 1       | 0       | 1       | 1        |
| Azotobacter      | 3              | 183            | 0        | 0        | 0        | 1       | 1       | 0       | 0        | 0        | 1       | 1        | 1       | 1        | 0       | 1       | 1        | 1       | 0       | 1       | 1       | 1        |
| Bacillales       | 1              | 9              | 0        | 0        | 0        | 0       | 0       | 0       | 0        | 0        | 0       | 0        | 0       | 0        | 0       | 0       | 0        | 0       | 0       | 1       | 0       | 0        |
| Bacilli          | 1              | 3              | 0        | 0        | 0        | 0       | 0       | 0       | 0        | 0        | 1       | 0        | 1       | 0        | 0       | 0       | 0        | 0       | 0       | 0       | 0       | 0        |
| Bacillus         | 2              | 237            | 0        | 0        | 0        | 0       | 0       | 1       | 0        | 0        | 1       | 0        | 1       | 1        | 0       | 1       | 1        | 1       | 0       | 1       | 1       | 1        |
| Bacteria         | 2              | 86             | 0        | 0        | 1        | 0       | 0       | 0       | 0        | 0        | 1       | 0        | 1       | 1        | 0       | 1       | 0        | 0       | 0       | 0       | 1       | 1        |
| Bacteriovorax    | 2              | 98             | 0        | 0        | 0        | 0       | 1       | 1       | 0        | 0        | 1       | 1        | 1       | 1        | 0       | 1       | 1        | 0       | 0       | 1       | 1       | 1        |
| Bacteroidales    | 2              | 59             | 0        | 0        | 0        | 0       | 1       | 0       | 0        | 0        | 1       | 0        | 1       | 0        | 0       | 0       | 1        | 0       | 0       | 0       | 1       | 0        |
| Bacteroides      | 2              | 96             | 0        | 0        | 0        | 0       | 1       | 1       | 0        | 0        | 1       | 0        | 1       | 0        | 0       | 0       | 1        | 0       | 0       | 1       | 1       | 0        |
| Bacteroidetes    | 1              | 2              | 0        | 0        | 0        | 0       | 0       | 1       | 0        | 0        | 0       | 0        | 0       | 0        | 0       | 0       | 0        | 0       | 0       | 0       | 0       | 0        |
| Bartonella       | 2              | 50             | 0        | 0        | 0        | 0       | 0       | 0       | 0        | 0        | 1       | 0        | 1       | 0        | 0       | 0       | 1        | 0       | 0       | 0       | 1       | 0        |
| Baumannia        | 2              | 24             | 0        | 0        | 0        | 0       | 0       | 1       | 0        | 0        | 1       | 0        | 1       | 0        | 0       | 0       | 1        | 0       | 0       | 0       | 1       | 0        |
| Bdellovibrio     | 2              | 87             | 0        | 0        | 0        | 0       | 0       | 1       | 0        | 0        | 1       | 0        | 1       | 1        | 0       | 1       | 1        | 0       | 0       | 1       | 1       | 1        |
| Beijerinckia     | 3              | 123            | 0        | 0        | 0        | 0       | 0       | 0       | 0        | 0        | 1       | 0        | 1       | 1        | 0       | 1       | 1        | 0       | 0       | 0       | 1       | 1        |
| Belliella        | 1              | 14             | 0        | 0        | 0        | 0       | 0       | 0       | 0        | 0        | 0       | 0        | 0       | 0        | 0       | 0       | 0        | 0       | 0       | 0       | 0       | 0        |
| Beutenbergia     | 2              | 82             | 0        | 0        | 0        | 0       | 0       | 0       | 0        | 0        | 1       | 0        | 1       | 1        | 0       | 1       | 1        | 0       | 1       | 1       | 1       | 1        |
| Bifidobacterium  | 2              | 61             | 0        | 0        | 0        | 0       | 0       | 0       | 0        | 0        | 1       | 0        | 1       | 0        | 0       | 0       | 1        | 0       | 0       | 1       | 1       | 0        |

| Genus                | Cluster Number | Protein Counts | 1.3.1.32 | 1.3.1.56 | 1.3.99.- | 1.4.3.4 | 1.6.5.- | 1.7.1.- | 1.8.99.3 | 1.97.1.8 | 2.1.1.- | 2.1.1.67 | 2.3.1.- | 2.3.1.16 | 2.3.1.5 | 2.3.1.9 | 2.4.2.10 | 2.4.2.3 | 2.4.2.4 | 2.4.2.8 | 2.5.1.- | 2.5.1.18 |
|----------------------|----------------|----------------|----------|----------|----------|---------|---------|---------|----------|----------|---------|----------|---------|----------|---------|---------|----------|---------|---------|---------|---------|----------|
| Bizonia              | 1              | 1              | 0        | 0        | 0        | 0       | 0       | 0       | 0        | 0        | 0       | 0        | 0       | 0        | 0       | 0       | 0        | 0       | 0       | 0       | 0       | 0        |
| Blastococcus         | 1              | 39             | 0        | 0        | 0        | 0       | 0       | 0       | 0        | 0        | 0       | 0        | 0       | 0        | 0       | 0       | 0        | 0       | 0       | 0       | 0       | 0        |
| Blattabacterium      | 1              | 23             | 0        | 0        | 0        | 0       | 0       | 0       | 0        | 0        | 1       | 0        | 1       | 0        | 0       | 0       | 1        | 0       | 0       | 0       | 1       | 0        |
| Blautia              | 1              | 22             | 0        | 0        | 0        | 0       | 0       | 0       | 0        | 0        | 1       | 0        | 1       | 0        | 0       | 0       | 1        | 0       | 0       | 1       | 0       | 0        |
| Bordetella           | 3              | 227            | 0        | 0        | 1        | 0       | 0       | 1       | 0        | 0        | 1       | 1        | 1       | 1        | 0       | 1       | 1        | 0       | 0       | 0       | 1       | 1        |
| Borrelia             | 1              | 32             | 0        | 0        | 0        | 0       | 0       | 0       | 0        | 0        | 1       | 0        | 1       | 0        | 0       | 1       | 0        | 0       | 0       | 1       | 0       | 0        |
| Brachybacterium      | 1              | 18             | 0        | 0        | 0        | 0       | 0       | 0       | 0        | 0        | 0       | 0        | 0       | 0        | 0       | 0       | 0        | 0       | 0       | 0       | 0       | 0        |
| Brachymonas          | 1              | 4              | 0        | 0        | 0        | 0       | 0       | 0       | 0        | 0        | 0       | 0        | 0       | 0        | 0       | 0       | 0        | 0       | 1       | 0       | 0       | 0        |
| Brachyspira          | 2              | 79             | 0        | 0        | 0        | 0       | 1       | 0       | 0        | 0        | 1       | 0        | 1       | 0        | 0       | 1       | 1        | 1       | 0       | 1       | 1       | 1        |
| Bradyrhizobiaceae    | 1              | 20             | 0        | 0        | 0        | 0       | 0       | 0       | 0        | 0        | 0       | 0        | 0       | 0        | 0       | 0       | 0        | 0       | 0       | 0       | 0       | 1        |
| Bradyrhizobium       | 3              | 254            | 0        | 0        | 0        | 0       | 0       | 1       | 0        | 0        | 1       | 0        | 1       | 1        | 1       | 1       | 1        | 0       | 1       | 0       | 1       | 1        |
| Brenneria            | 1              | 20             | 0        | 0        | 0        | 0       | 0       | 0       | 0        | 0        | 0       | 0        | 0       | 0        | 0       | 0       | 0        | 0       | 0       | 0       | 1       | 0        |
| Brevibacillus        | 2              | 122            | 0        | 0        | 0        | 0       | 0       | 0       | 0        | 0        | 1       | 0        | 1       | 1        | 0       | 1       | 1        | 1       | 0       | 1       | 1       | 1        |
| Brevibacterium       | 1              | 4              | 0        | 0        | 0        | 0       | 0       | 0       | 0        | 0        | 0       | 0        | 0       | 0        | 0       | 0       | 0        | 0       | 0       | 0       | 0       | 0        |
| Brevundimonas        | 2              | 105            | 0        | 0        | 0        | 0       | 0       | 0       | 0        | 0        | 1       | 0        | 1       | 1        | 0       | 1       | 1        | 0       | 0       | 1       | 1       | 1        |
| Brucella             | 3              | 138            | 0        | 0        | 0        | 0       | 0       | 1       | 0        | 0        | 1       | 0        | 1       | 1        | 0       | 1       | 1        | 0       | 0       | 1       | 1       | 1        |
| Buchnera             | 1              | 26             | 0        | 0        | 0        | 0       | 0       | 1       | 0        | 0        | 1       | 0        | 0       | 0        | 0       | 0       | 1        | 0       | 0       | 1       | 1       | 0        |
| Burkholderia         | 3              | 424            | 0        | 1        | 1        | 1       | 0       | 1       | 0        | 0        | 1       | 0        | 1       | 1        | 1       | 1       | 1        | 0       | 1       | 1       | 1       | 1        |
| Burkholderiaceae     | 3              | 143            | 0        | 0        | 0        | 0       | 0       | 1       | 0        | 0        | 1       | 0        | 1       | 1        | 0       | 1       | 0        | 0       | 0       | 0       | 1       | 1        |
| Burkholderiales      | 1              | 24             | 0        | 0        | 0        | 0       | 0       | 0       | 0        | 0        | 0       | 0        | 0       | 0        | 0       | 1       | 0        | 0       | 0       | 0       | 1       | 0        |
| Buttiauxella         | 1              | 2              | 0        | 0        | 0        | 0       | 0       | 0       | 0        | 0        | 0       | 0        | 0       | 0        | 0       | 0       | 0        | 0       | 0       | 0       | 0       | 0        |
| Butyrivibrio         | 2              | 67             | 0        | 0        | 0        | 0       | 0       | 0       | 0        | 0        | 1       | 0        | 1       | 0        | 0       | 1       | 1        | 1       | 0       | 1       | 1       | 0        |
| Caldanaerobacter     | 2              | 63             | 0        | 0        | 0        | 0       | 0       | 1       | 0        | 0        | 1       | 0        | 1       | 0        | 0       | 1       | 1        | 0       | 1       | 1       | 1       | 0        |
| Caldicellulosiruptor | 2              | 75             | 0        | 0        | 0        | 0       | 0       | 1       | 0        | 0        | 1       | 0        | 1       | 0        | 0       | 0       | 1        | 0       | 0       | 1       | 1       | 1        |
| Caldilinea           | 1              | 23             | 0        | 0        | 0        | 0       | 0       | 0       | 0        | 0        | 0       | 0        | 0       | 0        | 0       | 0       | 0        | 0       | 0       | 0       | 0       | 0        |
| Caldimonas           | 1              | 6              | 0        | 0        | 0        | 0       | 0       | 0       | 0        | 0        | 0       | 0        | 0       | 0        | 0       | 0       | 0        | 0       | 0       | 0       | 0       | 0        |
| Caldisericum         | 1              | 10             | 0        | 0        | 0        | 0       | 0       | 0       | 0        | 0        | 0       | 0        | 0       | 0        | 0       | 0       | 0        | 0       | 0       | 0       | 0       | 0        |
| Caldisphaera         | 1              | 7              | 0        | 0        | 0        | 0       | 0       | 0       | 0        | 0        | 0       | 0        | 0       | 0        | 0       | 0       | 0        | 0       | 0       | 0       | 0       | 0        |
| Calditerrivibrio     | 2              | 74             | 0        | 0        | 0        | 0       | 1       | 0       | 0        | 0        | 1       | 0        | 1       | 1        | 0       | 1       | 1        | 0       | 0       | 1       | 1       | 0        |
| Caldivirga           | 1              | 13             | 0        | 0        | 0        | 0       | 0       | 0       | 0        | 0        | 0       | 0        | 0       | 0        | 0       | 0       | 0        | 0       | 0       | 0       | 0       | 0        |
| Calothrix            | 1              | 43             | 0        | 0        | 0        | 0       | 0       | 1       | 0        | 0        | 1       | 0        | 0       | 0        | 0       | 0       | 0        | 0       | 0       | 0       | 0       | 1        |
| Calyptogena          | 2              | 34             | 0        | 0        | 0        | 0       | 0       | 0       | 1        | 0        | 1       | 0        | 1       | 0        | 0       | 0       | 1        | 0       | 0       | 0       | 1       | 0        |
| Campylobacter        | 2              | 80             | 0        | 0        | 0        | 0       | 0       | 1       | 0        | 0        | 1       | 0        | 1       | 0        | 0       | 0       | 1        | 0       | 0       | 0       | 1       | 0        |
| Candidatus           | 2              | 290            | 0        | 0        | 0        | 1       | 1       | 1       | 1        | 0        | 1       | 1        | 1       | 1        | 0       | 1       | 1        | 1       | 1       | 1       | 1       | 1        |
| Capnocytophaga       | 1              | 50             | 0        | 0        | 0        | 0       | 1       | 0       | 0        | 0        | 1       | 0        | 1       | 0        | 0       | 0       | 1        | 0       | 0       | 0       | 1       | 0        |
| Carbophilus          | 1              | 2              | 0        | 0        | 0        | 0       | 0       | 0       | 0        | 0        | 0       | 0        | 0       | 0        | 0       | 0       | 0        | 0       | 0       | 0       | 0       | 0        |
| Carboxydibrachium    | 1              | 14             | 0        | 0        | 0        | 0       | 0       | 0       | 0        | 0        | 0       | 0        | 0       | 0        | 0       | 0       | 1        | 0       | 0       | 0       | 0       | 0        |
| Carboxydotherrmus    | 2              | 68             | 0        | 0        | 0        | 0       | 0       | 0       | 0        | 0        | 1       | 0        | 1       | 1        | 0       | 1       | 0        | 0       | 0       | 1       | 0       | 0        |
| Carica               | 1              | 2              | 0        | 0        | 0        | 0       | 0       | 0       | 0        | 0        | 0       | 0        | 0       | 0        | 0       | 0       | 0        | 0       | 0       | 0       | 0       | 0        |
| Carnobacterium       | 2              | 71             | 0        | 0        | 0        | 0       | 0       | 0       | 0        | 0        | 1       | 0        | 1       | 0        | 0       | 1       | 1        | 0       | 0       | 1       | 0       | 1        |
| Catenibacterium      | 1              | 2              | 0        | 0        | 0        | 0       | 0       | 0       | 0        | 0        | 0       | 0        | 0       | 0        | 0       | 0       | 0        | 0       | 0       | 0       | 0       | 0        |
| Catenovulum          | 1              | 2              | 0        | 0        | 0        | 0       | 0       | 0       | 0        | 0        | 0       | 0        | 0       | 0        | 0       | 0       | 0        | 0       | 0       | 0       | 0       | 0        |
| Catenulispora        | 3              | 159            | 0        | 0        | 0        | 0       | 0       | 0       | 0        | 0        | 1       | 0        | 1       | 1        | 0       | 1       | 1        | 0       | 1       | 1       | 1       | 1        |
| Caulobacter          | 3              | 168            | 0        | 0        | 0        | 0       | 0       | 1       | 0        | 0        | 1       | 0        | 1       | 1        | 1       | 1       | 1        | 0       | 1       | 1       | 1       | 1        |
| Cedecea              | 1              | 45             | 0        | 0        | 1        | 0       | 0       | 0       | 0        | 0        | 1       | 0        | 0       | 1        | 0       | 1       | 1        | 1       | 1       | 1       | 1       | 0        |
| Cellulomonas         | 2              | 96             | 0        | 0        | 0        | 0       | 0       | 0       | 0        | 0        | 1       | 0        | 1       | 1        | 0       | 1       | 1        | 0       | 1       | 1       | 1       | 1        |
| Cellulophaga         | 2              | 105            | 0        | 0        | 0        | 0       | 1       | 0       | 0        | 0        | 1       | 0        | 1       | 1        | 0       | 1       | 1        | 0       | 0       | 0       | 1       | 1        |
| Cellulosilyticum     | 1              | 14             | 0        | 0        | 0        | 0       | 0       | 0       | 0        | 0        | 0       | 0        | 0       | 0        | 0       | 0       | 0        | 0       | 0       | 0       | 0       | 0        |
| Cellvibrio           | 2              | 85             | 0        | 0        | 0        | 0       | 1       | 1       | 0        | 0        | 1       | 0        | 1       | 0        | 0       | 1       | 1        | 0       | 1       | 1       | 1       | 1        |
| Cenarchaeum          | 1              | 7              | 0        | 0        | 0        | 0       | 0       | 0       | 0        | 0        | 0       | 0        | 0       | 0        | 0       | 0       | 0        | 0       | 0       | 0       | 0       | 0        |
| Chamaesiphon         | 1              | 13             | 0        | 0        | 0        | 0       | 0       | 0       | 0        | 0        | 0       | 0        | 0       | 0        | 0       | 0       | 0        | 0       | 0       | 0       | 0       | 0        |
| Chelativorans        | 3              | 136            | 0        | 0        | 0        | 0       | 0       | 1       | 0        | 0        | 1       | 0        | 1       | 1        | 0       | 1       | 1        | 0       | 1       | 1       | 1       | 1        |

| Genus                  | Cluster Number | Protein Counts | 1.3.1.32 | 1.3.1.56 | 1.3.99.- | 1.4.3.4 | 1.6.5.- | 1.7.1.- | 1.8.99.3 | 1.97.1.8 | 2.1.1.- | 2.1.1.67 | 2.3.1.- | 2.3.1.16 | 2.3.1.5 | 2.3.1.9 | 2.4.2.10 | 2.4.2.3 | 2.4.2.4 | 2.4.2.8 | 2.5.1.- | 2.5.1.18 |
|------------------------|----------------|----------------|----------|----------|----------|---------|---------|---------|----------|----------|---------|----------|---------|----------|---------|---------|----------|---------|---------|---------|---------|----------|
| Chelatococcus          | 1              | 2              | 0        | 0        | 0        | 0       | 0       | 0       | 0        | 0        | 0       | 0        | 0       | 0        | 0       | 0       | 0        | 0       | 0       | 0       | 0       | 0        |
| Chitinophaga           | 2              | 98             | 0        | 0        | 0        | 0       | 0       | 0       | 0        | 0        | 1       | 0        | 1       | 1        | 0       | 1       | 1        | 0       | 0       | 1       | 1       | 1        |
| Chlamydia              | 1              | 36             | 0        | 0        | 0        | 0       | 1       | 0       | 0        | 0        | 1       | 0        | 1       | 0        | 0       | 0       | 1        | 0       | 0       | 0       | 1       | 0        |
| Chlamydomonas          | 1              | 3              | 0        | 0        | 0        | 0       | 0       | 0       | 0        | 0        | 0       | 0        | 0       | 0        | 0       | 0       | 0        | 0       | 0       | 0       | 0       | 0        |
| Chlamydomphila         | 1              | 31             | 0        | 0        | 0        | 0       | 1       | 0       | 0        | 0        | 1       | 0        | 1       | 0        | 0       | 0       | 1        | 0       | 0       | 0       | 1       | 0        |
| Chlorobaculum          | 2              | 61             | 0        | 0        | 0        | 0       | 0       | 1       | 0        | 0        | 1       | 0        | 1       | 0        | 0       | 0       | 1        | 0       | 0       | 1       | 1       | 0        |
| Chlorobium             | 2              | 89             | 0        | 0        | 0        | 0       | 1       | 1       | 0        | 0        | 1       | 0        | 1       | 0        | 0       | 0       | 1        | 0       | 0       | 1       | 1       | 0        |
| Chlorobium/Pelodictyon | 1              | 2              | 0        | 0        | 0        | 0       | 0       | 0       | 0        | 0        | 0       | 0        | 0       | 0        | 0       | 0       | 0        | 0       | 0       | 0       | 0       | 0        |
| Chloroflexus           | 2              | 105            | 0        | 0        | 0        | 0       | 0       | 0       | 0        | 0        | 1       | 0        | 1       | 1        | 1       | 1       | 1        | 0       | 0       | 1       | 1       | 0        |
| Chlorogloeopsis        | 1              | 9              | 0        | 0        | 0        | 0       | 0       | 0       | 0        | 0        | 0       | 0        | 0       | 0        | 0       | 0       | 0        | 0       | 0       | 0       | 0       | 0        |
| Chloroherpeton         | 2              | 59             | 0        | 0        | 0        | 0       | 0       | 1       | 0        | 0        | 1       | 0        | 1       | 0        | 0       | 0       | 1        | 0       | 0       | 1       | 0       | 0        |
| Chromobacterium        | 2              | 117            | 0        | 0        | 0        | 0       | 0       | 1       | 0        | 0        | 1       | 0        | 1       | 1        | 0       | 1       | 1        | 0       | 1       | 1       | 1       | 1        |
| Chromohalobacter       | 2              | 145            | 0        | 0        | 0        | 0       | 1       | 1       | 0        | 0        | 1       | 1        | 1       | 0        | 0       | 1       | 1        | 0       | 1       | 1       | 1       | 1        |
| Chroococciopsis        | 1              | 24             | 0        | 0        | 0        | 0       | 0       | 0       | 0        | 0        | 0       | 0        | 0       | 0        | 0       | 0       | 0        | 0       | 0       | 0       | 0       | 0        |
| Chryseobacterium       | 2              | 104            | 0        | 0        | 0        | 0       | 0       | 0       | 0        | 0        | 1       | 0        | 1       | 1        | 0       | 1       | 1        | 0       | 0       | 0       | 0       | 1        |
| Citricella             | 1              | 13             | 0        | 0        | 0        | 0       | 1       | 0       | 0        | 0        | 0       | 0        | 0       | 0        | 0       | 1       | 0        | 0       | 0       | 0       | 0       | 0        |
| Citrobacter            | 2              | 190            | 0        | 0        | 1        | 0       | 1       | 1       | 0        | 0        | 1       | 0        | 1       | 1        | 0       | 1       | 1        | 1       | 1       | 1       | 1       | 1        |
| Clavibacter            | 2              | 83             | 0        | 0        | 0        | 0       | 0       | 0       | 0        | 0        | 1       | 0        | 1       | 1        | 0       | 0       | 1        | 0       | 1       | 1       | 1       | 1        |
| Clonorchis             | 1              | 1              | 0        | 0        | 0        | 0       | 0       | 0       | 0        | 0        | 0       | 0        | 0       | 0        | 0       | 0       | 0        | 0       | 0       | 0       | 0       | 0        |
| Clostridiales          | 2              | 77             | 0        | 0        | 0        | 0       | 0       | 0       | 0        | 0        | 1       | 0        | 1       | 1        | 0       | 0       | 1        | 0       | 0       | 1       | 1       | 0        |
| Clostridium            | 2              | 191            | 0        | 0        | 1        | 0       | 0       | 1       | 0        | 0        | 1       | 0        | 1       | 1        | 0       | 1       | 1        | 1       | 1       | 1       | 1       | 1        |
| Cohnella               | 1              | 2              | 0        | 0        | 0        | 0       | 0       | 0       | 0        | 0        | 0       | 0        | 0       | 0        | 0       | 0       | 0        | 0       | 0       | 0       | 0       | 0        |
| Coleofasciculus        | 1              | 4              | 0        | 0        | 0        | 0       | 0       | 0       | 0        | 0        | 0       | 0        | 0       | 0        | 0       | 0       | 0        | 0       | 0       | 0       | 0       | 0        |
| Collimonas             | 1              | 35             | 0        | 0        | 0        | 0       | 0       | 0       | 0        | 0        | 1       | 0        | 0       | 0        | 0       | 0       | 0        | 0       | 0       | 0       | 0       | 0        |
| Colwellia              | 2              | 130            | 0        | 0        | 0        | 0       | 1       | 1       | 0        | 0        | 1       | 1        | 1       | 1        | 0       | 1       | 1        | 0       | 1       | 1       | 1       | 1        |
| Comamonas              | 2              | 196            | 0        | 0        | 0        | 0       | 0       | 0       | 0        | 0        | 1       | 0        | 1       | 1        | 0       | 1       | 1        | 0       | 1       | 0       | 1       | 1        |
| Conexibacter           | 3              | 117            | 0        | 0        | 0        | 1       | 0       | 0       | 0        | 0        | 1       | 0        | 1       | 1        | 0       | 1       | 1        | 0       | 0       | 1       | 1       | 1        |
| Coprobacillus          | 1              | 2              | 0        | 0        | 0        | 0       | 0       | 0       | 0        | 0        | 1       | 0        | 0       | 0        | 0       | 0       | 0        | 0       | 0       | 0       | 0       | 0        |
| Coprococcus            | 2              | 76             | 0        | 0        | 0        | 0       | 1       | 0       | 0        | 0        | 1       | 0        | 1       | 1        | 0       | 1       | 1        | 1       | 0       | 1       | 1       | 0        |
| Coprothermobacter      | 2              | 45             | 0        | 0        | 0        | 0       | 0       | 0       | 0        | 0        | 1       | 0        | 1       | 1        | 0       | 0       | 1        | 0       | 0       | 1       | 0       | 0        |
| Coraliomargarita       | 2              | 68             | 0        | 0        | 0        | 0       | 0       | 0       | 0        | 0        | 1       | 0        | 1       | 0        | 0       | 0       | 1        | 0       | 1       | 1       | 1       | 0        |
| Corallococcus          | 1              | 29             | 0        | 0        | 0        | 0       | 0       | 0       | 0        | 0        | 0       | 0        | 0       | 0        | 0       | 0       | 0        | 0       | 0       | 0       | 0       | 1        |
| Coriobacterium         | 2              | 36             | 0        | 0        | 0        | 0       | 0       | 0       | 0        | 0        | 1       | 0        | 1       | 0        | 0       | 0       | 1        | 0       | 0       | 1       | 1       | 0        |
| Corynebacterineae      | 1              | 5              | 0        | 0        | 0        | 0       | 0       | 0       | 0        | 0        | 0       | 0        | 0       | 1        | 0       | 1       | 0        | 0       | 0       | 0       | 0       | 0        |
| Corynebacterium        | 2              | 175            | 0        | 0        | 0        | 0       | 0       | 0       | 0        | 0        | 1       | 0        | 1       | 1        | 0       | 1       | 1        | 0       | 1       | 1       | 1       | 0        |
| Coxiella               | 2              | 54             | 0        | 0        | 0        | 0       | 0       | 1       | 0        | 0        | 1       | 0        | 1       | 1        | 0       | 1       | 1        | 1       | 0       | 1       | 1       | 0        |
| Crinalium              | 1              | 21             | 0        | 0        | 0        | 0       | 0       | 0       | 0        | 0        | 0       | 0        | 0       | 0        | 0       | 0       | 0        | 0       | 0       | 0       | 0       | 0        |
| Croceibacter           | 2              | 80             | 0        | 0        | 0        | 0       | 1       | 0       | 0        | 0        | 1       | 0        | 1       | 0        | 0       | 1       | 1        | 0       | 0       | 0       | 1       | 0        |
| Crocospaera            | 1              | 6              | 0        | 0        | 0        | 0       | 0       | 0       | 0        | 0        | 0       | 0        | 0       | 0        | 0       | 0       | 0        | 0       | 0       | 0       | 0       | 0        |
| Cronobacter            | 2              | 120            | 0        | 0        | 0        | 0       | 0       | 0       | 0        | 0        | 1       | 0        | 1       | 1        | 0       | 1       | 1        | 1       | 1       | 1       | 1       | 1        |
| Cryptobacterium        | 2              | 39             | 0        | 0        | 0        | 0       | 0       | 1       | 0        | 0        | 1       | 0        | 1       | 0        | 0       | 0       | 1        | 0       | 0       | 1       | 0       | 0        |
| Cucumis                | 1              | 9              | 0        | 0        | 0        | 0       | 1       | 0       | 0        | 0        | 1       | 0        | 0       | 0        | 0       | 0       | 0        | 0       | 0       | 1       | 0       | 0        |
| Cupriavidus            | 3              | 317            | 0        | 1        | 1        | 1       | 0       | 1       | 0        | 0        | 1       | 0        | 1       | 1        | 1       | 1       | 1        | 0       | 1       | 1       | 1       | 1        |
| Curtobacterium         | 1              | 5              | 0        | 0        | 0        | 0       | 0       | 0       | 0        | 0        | 0       | 0        | 0       | 0        | 0       | 0       | 0        | 0       | 0       | 0       | 0       | 0        |
| Curvibacter            | 1              | 27             | 0        | 0        | 0        | 0       | 0       | 0       | 0        | 0        | 0       | 0        | 0       | 1        | 0       | 0       | 0        | 0       | 0       | 0       | 0       | 0        |
| Cyanobacterium         | 1              | 9              | 0        | 0        | 0        | 0       | 0       | 0       | 0        | 0        | 0       | 0        | 0       | 0        | 0       | 0       | 0        | 0       | 0       | 0       | 0       | 0        |
| Cyanobium              | 1              | 10             | 0        | 0        | 0        | 0       | 0       | 0       | 0        | 0        | 0       | 0        | 0       | 0        | 0       | 0       | 0        | 0       | 0       | 0       | 0       | 0        |
| Cyanothece             | 1              | 34             | 0        | 0        | 0        | 0       | 0       | 0       | 0        | 0        | 0       | 0        | 0       | 0        | 0       | 0       | 0        | 0       | 0       | 0       | 0       | 0        |
| Cyclobacterium         | 1              | 19             | 0        | 0        | 0        | 0       | 0       | 0       | 0        | 0        | 0       | 0        | 0       | 0        | 0       | 0       | 0        | 0       | 0       | 0       | 0       | 0        |
| Cycloclasticus         | 1              | 21             | 0        | 0        | 0        | 0       | 0       | 0       | 0        | 0        | 0       | 0        | 0       | 0        | 0       | 0       | 0        | 0       | 0       | 0       | 0       | 0        |
| Cylindrospermopsis     | 1              | 4              | 0        | 0        | 0        | 0       | 0       | 0       | 0        | 0        | 0       | 0        | 0       | 0        | 0       | 0       | 0        | 0       | 0       | 0       | 0       | 0        |
| Cylindrospermum        | 1              | 30             | 0        | 0        | 0        | 0       | 0       | 0       | 0        | 0        | 1       | 0        | 0       | 0        | 0       | 0       | 0        | 0       | 0       | 0       | 0       | 0        |

| Genus              | Cluster Number | Protein Counts | 1.3.1.32 | 1.3.1.56 | 1.3.99.- | 1.4.3.4 | 1.6.5.- | 1.7.1.- | 1.8.99.3 | 1.97.1.8 | 2.1.1.- | 2.1.1.67 | 2.3.1.- | 2.3.1.16 | 2.3.1.5 | 2.3.1.9 | 2.4.2.10 | 2.4.2.3 | 2.4.2.4 | 2.4.2.8 | 2.5.1.- | 2.5.1.18 |
|--------------------|----------------|----------------|----------|----------|----------|---------|---------|---------|----------|----------|---------|----------|---------|----------|---------|---------|----------|---------|---------|---------|---------|----------|
| Cytophaga          | 2              | 69             | 0        | 0        | 0        | 0       | 0       | 0       | 0        | 0        | 1       | 0        | 1       | 0        | 0       | 1       | 1        | 0       | 0       | 0       | 1       | 1        |
| Dactylococcopsis   | 1              | 8              | 0        | 0        | 0        | 0       | 0       | 0       | 0        | 0        | 0       | 0        | 0       | 0        | 0       | 0       | 0        | 0       | 0       | 0       | 0       | 0        |
| Dechloromonas      | 1              | 40             | 0        | 0        | 0        | 0       | 0       | 0       | 0        | 0        | 0       | 0        | 0       | 0        | 0       | 0       | 0        | 0       | 0       | 0       | 0       | 0        |
| Dechlorosoma       | 1              | 19             | 0        | 0        | 0        | 0       | 0       | 0       | 0        | 0        | 0       | 0        | 0       | 0        | 0       | 0       | 0        | 0       | 0       | 0       | 0       | 0        |
| Deferribacter      | 2              | 73             | 0        | 0        | 0        | 0       | 1       | 0       | 0        | 0        | 1       | 0        | 1       | 1        | 0       | 1       | 1        | 0       | 0       | 1       | 1       | 0        |
| Dehalobacter       | 1              | 9              | 0        | 0        | 0        | 0       | 0       | 0       | 0        | 0        | 0       | 0        | 0       | 0        | 0       | 0       | 0        | 0       | 0       | 0       | 0       | 0        |
| Dehalococcoides    | 2              | 41             | 0        | 0        | 0        | 0       | 0       | 0       | 0        | 1        | 1       | 0        | 1       | 0        | 0       | 0       | 1        | 0       | 0       | 1       | 1       | 0        |
| Dehalogenimonas    | 1              | 37             | 0        | 0        | 0        | 0       | 0       | 0       | 0        | 0        | 1       | 0        | 1       | 0        | 0       | 0       | 1        | 0       | 0       | 1       | 0       | 0        |
| Deinococcus        | 2              | 140            | 0        | 0        | 0        | 0       | 0       | 0       | 0        | 0        | 1       | 0        | 1       | 1        | 0       | 1       | 1        | 0       | 0       | 1       | 1       | 1        |
| Delftia            | 3              | 177            | 0        | 0        | 0        | 0       | 0       | 0       | 0        | 0        | 1       | 0        | 1       | 1        | 0       | 1       | 1        | 0       | 1       | 0       | 1       | 1        |
| Denitrovibrio      | 2              | 67             | 0        | 0        | 0        | 0       | 1       | 0       | 0        | 0        | 1       | 0        | 1       | 0        | 0       | 0       | 1        | 0       | 0       | 1       | 1       | 0        |
| Desulfarculus      | 2              | 92             | 0        | 0        | 0        | 0       | 0       | 0       | 1        | 0        | 1       | 0        | 1       | 1        | 0       | 1       | 1        | 0       | 0       | 1       | 0       | 0        |
| Desulfatibacillum  | 3              | 84             | 0        | 0        | 0        | 0       | 0       | 1       | 0        | 0        | 1       | 0        | 1       | 1        | 0       | 1       | 1        | 1       | 0       | 1       | 1       | 0        |
| Desulfitobacterium | 2              | 102            | 0        | 0        | 1        | 0       | 0       | 0       | 0        | 1        | 1       | 0        | 1       | 1        | 1       | 1       | 1        | 0       | 0       | 1       | 1       | 0        |
| Desulfobacca       | 2              | 65             | 0        | 0        | 0        | 0       | 0       | 0       | 1        | 0        | 1       | 0        | 1       | 0        | 0       | 0       | 1        | 0       | 0       | 1       | 1       | 0        |
| Desulfobacterium   | 2              | 113            | 0        | 0        | 0        | 0       | 1       | 0       | 1        | 0        | 1       | 0        | 1       | 1        | 0       | 1       | 1        | 1       | 0       | 1       | 1       | 0        |
| Desulfobacula      | 1              | 21             | 0        | 0        | 0        | 0       | 0       | 0       | 0        | 0        | 0       | 0        | 0       | 0        | 0       | 0       | 0        | 0       | 0       | 0       | 0       | 0        |
| Desulfobulbus      | 2              | 88             | 0        | 0        | 0        | 0       | 0       | 0       | 1        | 0        | 1       | 0        | 1       | 0        | 0       | 1       | 1        | 0       | 0       | 1       | 1       | 0        |
| Desulfocapsa       | 1              | 9              | 0        | 0        | 0        | 0       | 0       | 0       | 0        | 0        | 0       | 0        | 0       | 0        | 0       | 0       | 0        | 0       | 0       | 0       | 0       | 0        |
| Desulfococcus      | 2              | 80             | 0        | 0        | 0        | 0       | 1       | 1       | 0        | 0        | 1       | 0        | 1       | 1        | 0       | 1       | 1        | 1       | 0       | 1       | 1       | 0        |
| Desulfohalobium    | 2              | 52             | 0        | 0        | 0        | 0       | 1       | 0       | 0        | 0        | 1       | 0        | 1       | 0        | 0       | 0       | 1        | 0       | 0       | 1       | 1       | 0        |
| Desulfomicrobium   | 2              | 65             | 0        | 0        | 0        | 0       | 1       | 0       | 0        | 0        | 1       | 0        | 1       | 0        | 0       | 0       | 1        | 0       | 0       | 1       | 1       | 0        |
| Desulfomonile      | 1              | 25             | 0        | 0        | 0        | 0       | 0       | 0       | 0        | 0        | 0       | 0        | 0       | 0        | 0       | 0       | 0        | 0       | 0       | 0       | 0       | 0        |
| Desulforhabdus     | 1              | 2              | 0        | 0        | 0        | 0       | 0       | 0       | 0        | 0        | 0       | 0        | 0       | 0        | 0       | 0       | 0        | 0       | 0       | 0       | 0       | 0        |
| Desulfosporosinus  | 1              | 30             | 0        | 0        | 0        | 0       | 0       | 0       | 0        | 0        | 0       | 0        | 0       | 0        | 0       | 0       | 0        | 0       | 0       | 0       | 0       | 0        |
| Desulfotalea       | 2              | 66             | 0        | 0        | 0        | 0       | 1       | 1       | 1        | 0        | 1       | 0        | 1       | 0        | 0       | 0       | 1        | 0       | 0       | 1       | 0       | 0        |
| Desulfotomaculum   | 2              | 98             | 0        | 0        | 1        | 0       | 0       | 0       | 0        | 0        | 1       | 0        | 1       | 1        | 0       | 1       | 1        | 0       | 0       | 1       | 0       | 0        |
| Desulfovibrio      | 2              | 144            | 0        | 0        | 0        | 0       | 1       | 1       | 1        | 0        | 1       | 0        | 1       | 0        | 0       | 0       | 1        | 0       | 1       | 1       | 1       | 0        |
| Desulfurispirillum | 2              | 78             | 0        | 0        | 0        | 0       | 0       | 0       | 0        | 0        | 1       | 0        | 1       | 1        | 0       | 1       | 1        | 0       | 0       | 1       | 1       | 1        |
| Desulfurivibrio    | 2              | 71             | 0        | 0        | 0        | 0       | 1       | 0       | 1        | 0        | 1       | 0        | 1       | 0        | 0       | 0       | 1        | 0       | 0       | 1       | 1       | 0        |
| Desulfurobacterium | 2              | 53             | 0        | 0        | 0        | 0       | 0       | 0       | 0        | 0        | 1       | 0        | 1       | 0        | 0       | 0       | 1        | 0       | 0       | 1       | 1       | 0        |
| Desulfurococcus    | 1              | 11             | 0        | 0        | 0        | 0       | 0       | 0       | 0        | 0        | 0       | 0        | 0       | 0        | 0       | 0       | 0        | 0       | 0       | 0       | 0       | 0        |
| Diaphorobacter     | 1              | 16             | 0        | 0        | 0        | 0       | 0       | 0       | 0        | 0        | 0       | 0        | 0       | 0        | 0       | 0       | 0        | 0       | 0       | 0       | 0       | 0        |
| Dichelobacter      | 2              | 45             | 0        | 0        | 0        | 0       | 1       | 1       | 0        | 0        | 1       | 0        | 1       | 0        | 0       | 0       | 1        | 0       | 1       | 1       | 0       | 1        |
| Dickeya            | 2              | 155            | 0        | 0        | 1        | 0       | 0       | 0       | 0        | 0        | 1       | 0        | 1       | 1        | 0       | 1       | 1        | 1       | 1       | 1       | 1       | 1        |
| Dictyoglomus       | 2              | 62             | 0        | 0        | 0        | 0       | 0       | 0       | 0        | 0        | 1       | 0        | 1       | 0        | 0       | 0       | 1        | 0       | 0       | 1       | 0       | 0        |
| Dinoroseobacter    | 3              | 148            | 0        | 0        | 0        | 0       | 0       | 0       | 0        | 0        | 1       | 0        | 1       | 1        | 0       | 1       | 1        | 0       | 1       | 1       | 1       | 1        |
| Dokdonia           | 1              | 3              | 0        | 0        | 0        | 0       | 0       | 0       | 0        | 0        | 0       | 0        | 0       | 0        | 0       | 1       | 0        | 0       | 0       | 0       | 0       | 0        |
| Dorea              | 1              | 7              | 0        | 0        | 0        | 0       | 0       | 0       | 0        | 0        | 1       | 0        | 0       | 0        | 0       | 0       | 1        | 0       | 0       | 0       | 0       | 0        |
| Dyadobacter        | 2              | 83             | 0        | 0        | 0        | 1       | 0       | 0       | 0        | 0        | 1       | 0        | 1       | 1        | 0       | 1       | 1        | 0       | 0       | 1       | 1       | 1        |
| Echinicola         | 1              | 20             | 0        | 0        | 0        | 0       | 0       | 0       | 0        | 0        | 0       | 0        | 0       | 0        | 0       | 0       | 0        | 0       | 0       | 0       | 0       | 0        |
| Edwardsiella       | 2              | 126            | 0        | 0        | 1        | 0       | 0       | 0       | 0        | 0        | 1       | 0        | 1       | 1        | 0       | 0       | 1        | 1       | 1       | 1       | 1       | 1        |
| Eggerthella        | 1              | 51             | 0        | 0        | 1        | 0       | 0       | 0       | 0        | 0        | 1       | 0        | 1       | 0        | 0       | 0       | 1        | 0       | 0       | 1       | 1       | 0        |
| Ehrlichia          | 2              | 37             | 0        | 0        | 0        | 0       | 0       | 0       | 0        | 0        | 1       | 0        | 1       | 0        | 0       | 0       | 1        | 0       | 0       | 0       | 1       | 0        |
| Eikenella          | 1              | 4              | 0        | 0        | 0        | 0       | 0       | 0       | 0        | 0        | 0       | 0        | 0       | 0        | 0       | 0       | 0        | 0       | 0       | 0       | 0       | 0        |
| Elusimicrobium     | 2              | 44             | 0        | 0        | 0        | 0       | 0       | 1       | 0        | 0        | 1       | 0        | 1       | 0        | 0       | 0       | 1        | 1       | 0       | 1       | 0       | 0        |
| Emticicia          | 1              | 21             | 0        | 0        | 0        | 0       | 0       | 0       | 0        | 0        | 0       | 0        | 0       | 0        | 0       | 0       | 0        | 0       | 0       | 0       | 0       | 0        |
| Enhydrobacter      | 1              | 1              | 0        | 0        | 0        | 0       | 0       | 0       | 0        | 0        | 0       | 0        | 0       | 0        | 0       | 0       | 0        | 0       | 0       | 0       | 0       | 0        |
| Ensifer            | 1              | 2              | 0        | 0        | 0        | 0       | 0       | 0       | 0        | 0        | 0       | 0        | 0       | 0        | 0       | 0       | 0        | 0       | 0       | 0       | 0       | 0        |
| Enterobacter       | 2              | 202            | 0        | 0        | 0        | 0       | 1       | 1       | 0        | 0        | 1       | 0        | 1       | 1        | 0       | 1       | 1        | 1       | 1       | 1       | 1       | 1        |
| Enterobacteriaceae | 2              | 211            | 0        | 0        | 1        | 0       | 1       | 1       | 0        | 0        | 1       | 0        | 1       | 1        | 0       | 1       | 1        | 1       | 1       | 1       | 1       | 1        |
| Enterococcus       | 1              | 187            | 0        | 0        | 0        | 0       | 1       | 1       | 0        | 0        | 1       | 1        | 1       | 1        | 0       | 1       | 1        | 1       | 1       | 1       | 1       | 1        |



| Genus               | Cluster Number | Protein Counts | 1.3.1.32 | 1.3.1.56 | 1.3.99.- | 1.4.3.4 | 1.6.5.- | 1.7.1.- | 1.8.99.3 | 1.97.1.8 | 2.1.1.- | 2.1.1.67 | 2.3.1.- | 2.3.1.16 | 2.3.1.5 | 2.3.1.9 | 2.4.2.10 | 2.4.2.3 | 2.4.2.4 | 2.4.2.8 | 2.5.1.- | 2.5.1.18 |
|---------------------|----------------|----------------|----------|----------|----------|---------|---------|---------|----------|----------|---------|----------|---------|----------|---------|---------|----------|---------|---------|---------|---------|----------|
| Enterovibrio        | 1              | 15             | 0        | 0        | 0        | 0       | 1       | 0       | 0        | 0        | 0       | 0        | 0       | 0        | 0       | 0       | 0        | 0       | 0       | 0       | 0       | 0        |
| Erwinia             | 2              | 151            | 0        | 0        | 0        | 0       | 0       | 0       | 0        | 0        | 1       | 0        | 1       | 1        | 0       | 1       | 1        | 1       | 1       | 1       | 1       | 1        |
| Erysipelothrix      | 1              | 9              | 0        | 0        | 0        | 0       | 0       | 0       | 0        | 0        | 0       | 0        | 0       | 0        | 0       | 0       | 0        | 0       | 0       | 0       | 0       | 0        |
| Erysipelotrichaceae | 1              | 4              | 0        | 0        | 0        | 0       | 0       | 0       | 0        | 0        | 1       | 0        | 1       | 0        | 0       | 0       | 0        | 0       | 0       | 0       | 0       | 0        |
| Erythrobacter       | 2              | 80             | 0        | 0        | 0        | 0       | 0       | 1       | 0        | 0        | 1       | 0        | 1       | 0        | 0       | 1       | 1        | 0       | 0       | 0       | 0       | 1        |
| Escherichia         | 2              | 242            | 0        | 0        | 1        | 0       | 1       | 1       | 0        | 0        | 1       | 0        | 1       | 1        | 0       | 1       | 1        | 1       | 1       | 1       | 1       | 1        |
| Ethanoligenens      | 2              | 69             | 0        | 0        | 0        | 0       | 0       | 0       | 0        | 0        | 1       | 0        | 1       | 0        | 0       | 0       | 1        | 1       | 0       | 1       | 1       | 0        |
| Eubacteriaceae      | 1              | 2              | 0        | 0        | 0        | 0       | 0       | 0       | 0        | 0        | 1       | 0        | 0       | 0        | 0       | 0       | 0        | 0       | 0       | 0       | 0       | 0        |
| Eubacterium         | 2              | 103            | 0        | 0        | 0        | 0       | 1       | 0       | 0        | 0        | 1       | 0        | 1       | 1        | 0       | 0       | 1        | 1       | 0       | 1       | 1       | 0        |
| Eudoraea            | 1              | 4              | 0        | 0        | 0        | 0       | 1       | 0       | 0        | 0        | 0       | 0        | 0       | 0        | 0       | 0       | 0        | 0       | 0       | 0       | 0       | 0        |
| Euryarchaeota       | 1              | 1              | 0        | 0        | 0        | 0       | 0       | 0       | 0        | 0        | 0       | 0        | 0       | 0        | 0       | 0       | 0        | 0       | 0       | 0       | 0       | 0        |
| Exiguobacterium     | 2              | 93             | 0        | 0        | 0        | 0       | 0       | 1       | 0        | 0        | 1       | 0        | 1       | 1        | 0       | 1       | 1        | 0       | 0       | 1       | 1       | 1        |
| Faecalibacterium    | 1              | 12             | 0        | 0        | 0        | 0       | 0       | 0       | 0        | 0        | 0       | 0        | 1       | 0        | 0       | 0       | 0        | 0       | 0       | 0       | 0       | 0        |
| Ferrimonas          | 2              | 115            | 0        | 0        | 0        | 0       | 1       | 0       | 0        | 0        | 1       | 1        | 1       | 1        | 0       | 0       | 1        | 1       | 1       | 1       | 1       | 1        |
| Ferroglobus         | 1              | 14             | 0        | 0        | 0        | 0       | 0       | 0       | 0        | 0        | 0       | 0        | 0       | 0        | 0       | 0       | 0        | 0       | 0       | 0       | 0       | 0        |
| Ferroplasma         | 1              | 11             | 0        | 0        | 0        | 0       | 0       | 0       | 0        | 0        | 0       | 0        | 0       | 0        | 0       | 0       | 0        | 0       | 0       | 0       | 0       | 0        |
| Fervidicoccus       | 1              | 7              | 0        | 0        | 0        | 0       | 0       | 0       | 0        | 0        | 0       | 0        | 0       | 0        | 0       | 0       | 0        | 0       | 0       | 0       | 0       | 0        |
| Fervidobacterium    | 2              | 54             | 0        | 0        | 0        | 0       | 1       | 0       | 0        | 0        | 1       | 0        | 1       | 1        | 0       | 0       | 1        | 0       | 0       | 1       | 0       | 0        |
| Fibrella            | 1              | 17             | 0        | 0        | 0        | 0       | 0       | 0       | 0        | 0        | 0       | 0        | 0       | 0        | 0       | 0       | 0        | 0       | 0       | 0       | 0       | 0        |
| Fibrobacter         | 2              | 52             | 0        | 0        | 0        | 0       | 0       | 0       | 0        | 0        | 1       | 0        | 1       | 0        | 0       | 0       | 1        | 0       | 0       | 1       | 1       | 0        |
| Filifactor          | 1              | 9              | 0        | 0        | 0        | 0       | 0       | 0       | 0        | 0        | 0       | 0        | 0       | 0        | 0       | 0       | 0        | 0       | 0       | 0       | 0       | 0        |
| Finegoldia          | 2              | 55             | 0        | 0        | 0        | 0       | 1       | 0       | 0        | 0        | 1       | 0        | 1       | 0        | 0       | 0       | 1        | 1       | 0       | 1       | 1       | 1        |
| Firmicutes          | 1              | 15             | 0        | 0        | 0        | 0       | 0       | 0       | 0        | 0        | 1       | 0        | 1       | 0        | 0       | 0       | 0        | 0       | 0       | 0       | 0       | 0        |
| Fischerella         | 1              | 15             | 0        | 0        | 0        | 0       | 0       | 0       | 0        | 0        | 0       | 0        | 0       | 0        | 0       | 0       | 0        | 0       | 0       | 0       | 0       | 0        |
| Flavobacteria       | 1              | 7              | 0        | 0        | 0        | 0       | 1       | 0       | 0        | 0        | 0       | 0        | 0       | 0        | 0       | 0       | 0        | 0       | 0       | 0       | 0       | 0        |
| Flavobacteriaceae   | 2              | 69             | 0        | 0        | 0        | 0       | 1       | 0       | 0        | 0        | 1       | 0        | 1       | 1        | 0       | 1       | 1        | 0       | 0       | 1       | 1       | 1        |
| Flavobacteriales    | 1              | 3              | 0        | 0        | 0        | 0       | 0       | 0       | 0        | 0        | 0       | 0        | 0       | 0        | 0       | 0       | 0        | 0       | 0       | 0       | 0       | 0        |
| Flavobacterium      | 2              | 103            | 0        | 0        | 0        | 0       | 0       | 0       | 0        | 0        | 1       | 0        | 1       | 0        | 0       | 1       | 1        | 0       | 0       | 1       | 1       | 1        |
| Flexibacter         | 1              | 17             | 0        | 0        | 0        | 0       | 0       | 0       | 0        | 0        | 0       | 0        | 0       | 0        | 0       | 0       | 0        | 0       | 0       | 0       | 0       | 0        |
| Flexistipes         | 1              | 11             | 0        | 0        | 0        | 0       | 0       | 0       | 0        | 0        | 0       | 0        | 0       | 0        | 0       | 0       | 0        | 0       | 0       | 0       | 0       | 0        |
| Fluoribacter        | 1              | 6              | 0        | 0        | 0        | 0       | 0       | 0       | 0        | 0        | 0       | 0        | 0       | 0        | 0       | 0       | 0        | 0       | 0       | 0       | 0       | 0        |
| Fluviicola          | 2              | 69             | 0        | 0        | 0        | 0       | 0       | 0       | 0        | 0        | 1       | 0        | 1       | 1        | 0       | 1       | 1        | 0       | 0       | 1       | 1       | 1        |
| Formosa             | 1              | 2              | 0        | 0        | 0        | 0       | 1       | 0       | 0        | 0        | 0       | 0        | 0       | 0        | 0       | 0       | 0        | 0       | 0       | 0       | 0       | 0        |
| Francisella         | 2              | 88             | 0        | 0        | 0        | 0       | 0       | 0       | 0        | 0        | 1       | 1        | 1       | 1        | 0       | 1       | 1        | 1       | 0       | 1       | 1       | 0        |
| Frankia             | 3              | 202            | 0        | 0        | 1        | 0       | 0       | 1       | 0        | 0        | 1       | 0        | 1       | 1        | 0       | 1       | 1        | 1       | 1       | 1       | 1       | 1        |
| Frateuria           | 1              | 25             | 0        | 0        | 0        | 0       | 0       | 0       | 0        | 0        | 0       | 0        | 0       | 0        | 0       | 0       | 0        | 0       | 0       | 0       | 0       | 0        |
| Fructobacillus      | 1              | 2              | 0        | 0        | 0        | 0       | 0       | 0       | 0        | 0        | 0       | 0        | 0       | 0        | 0       | 0       | 0        | 0       | 0       | 0       | 0       | 0        |
| Fulvimarina         | 1              | 2              | 0        | 0        | 0        | 0       | 0       | 0       | 0        | 0        | 0       | 0        | 0       | 0        | 0       | 0       | 0        | 0       | 0       | 0       | 0       | 0        |
| Fusobacterium       | 1              | 48             | 0        | 0        | 0        | 0       | 0       | 0       | 0        | 0        | 1       | 0        | 1       | 0        | 0       | 1       | 1        | 0       | 0       | 1       | 0       | 0        |
| Gallibacterium      | 2              | 87             | 0        | 0        | 0        | 0       | 1       | 0       | 0        | 0        | 1       | 0        | 1       | 1        | 0       | 0       | 1        | 1       | 0       | 1       | 1       | 0        |
| Gallionella         | 2              | 67             | 0        | 0        | 0        | 0       | 0       | 0       | 0        | 0        | 1       | 0        | 1       | 0        | 0       | 1       | 1        | 0       | 0       | 1       | 1       | 0        |
| Gammaproteobacteria | 1              | 9              | 0        | 0        | 0        | 0       | 0       | 0       | 0        | 0        | 0       | 0        | 1       | 0        | 0       | 0       | 0        | 0       | 0       | 0       | 0       | 1        |
| Gardnerella         | 1              | 31             | 0        | 0        | 0        | 0       | 0       | 0       | 0        | 0        | 1       | 0        | 1       | 0        | 0       | 1       | 1        | 1       | 0       | 1       | 1       | 0        |
| Geitlerinema        | 1              | 9              | 0        | 0        | 0        | 0       | 0       | 0       | 0        | 0        | 0       | 0        | 0       | 0        | 0       | 0       | 0        | 0       | 0       | 0       | 0       | 0        |
| Gemmatimonas        | 2              | 93             | 0        | 0        | 0        | 0       | 0       | 0       | 0        | 0        | 1       | 0        | 1       | 0        | 0       | 1       | 1        | 0       | 0       | 1       | 1       | 1        |
| Geobacillus         | 2              | 168            | 0        | 0        | 0        | 0       | 0       | 1       | 0        | 0        | 1       | 0        | 1       | 1        | 0       | 1       | 1        | 0       | 0       | 1       | 1       | 0        |
| Geobacter           | 2              | 150            | 0        | 0        | 0        | 0       | 1       | 0       | 0        | 1        | 1       | 0        | 1       | 1        | 0       | 1       | 1        | 1       | 0       | 1       | 1       | 1        |
| Geodermatophilus    | 2              | 136            | 0        | 0        | 0        | 0       | 0       | 0       | 0        | 0        | 1       | 0        | 1       | 1        | 0       | 1       | 1        | 0       | 1       | 1       | 1       | 1        |
| Geopsychrobacter    | 1              | 2              | 0        | 0        | 0        | 0       | 0       | 0       | 0        | 0        | 0       | 0        | 0       | 0        | 0       | 0       | 0        | 0       | 0       | 0       | 0       | 0        |
| Gillisia            | 1              | 11             | 0        | 0        | 0        | 0       | 1       | 0       | 0        | 0        | 0       | 0        | 0       | 0        | 0       | 0       | 0        | 0       | 0       | 0       | 0       | 0        |
| Gilvimarinus        | 1              | 4              | 0        | 0        | 0        | 0       | 0       | 0       | 0        | 0        | 0       | 0        | 0       | 0        | 0       | 0       | 0        | 0       | 0       | 0       | 0       | 0        |
| Glaciecola          | 2              | 117            | 0        | 0        | 0        | 0       | 1       | 1       | 0        | 0        | 1       | 0        | 1       | 1        | 0       | 0       | 1        | 0       | 0       | 1       | 1       | 1        |

| Genus             | Cluster Number | Protein Counts | 1.3.1.32 | 1.3.1.56 | 1.3.99.- | 1.4.3.4 | 1.6.5.- | 1.7.1.- | 1.8.99.3 | 1.97.1.8 | 2.1.1.- | 2.1.1.67 | 2.3.1.- | 2.3.1.16 | 2.3.1.5 | 2.3.1.9 | 2.4.2.10 | 2.4.2.3 | 2.4.2.4 | 2.4.2.8 | 2.5.1.- | 2.5.1.18 |
|-------------------|----------------|----------------|----------|----------|----------|---------|---------|---------|----------|----------|---------|----------|---------|----------|---------|---------|----------|---------|---------|---------|---------|----------|
| Gloeobacter       | 2              | 67             | 0        | 0        | 0        | 0       | 0       | 1       | 0        | 0        | 1       | 0        | 1       | 0        | 0       | 0       | 1        | 0       | 0       | 1       | 1       | 1        |
| Gloeocapsa        | 1              | 20             | 0        | 0        | 0        | 0       | 0       | 0       | 0        | 0        | 0       | 0        | 0       | 0        | 0       | 0       | 0        | 0       | 0       | 0       | 0       | 0        |
| Gloeotheca        | 1              | 1              | 0        | 0        | 0        | 0       | 0       | 0       | 0        | 0        | 0       | 0        | 0       | 0        | 0       | 0       | 0        | 0       | 0       | 0       | 0       | 0        |
| Gluconacetobacter | 2              | 96             | 0        | 0        | 0        | 0       | 0       | 0       | 0        | 0        | 1       | 0        | 1       | 1        | 0       | 1       | 1        | 1       | 0       | 0       | 1       | 1        |
| Gluconobacter     | 2              | 76             | 0        | 0        | 0        | 0       | 0       | 1       | 0        | 0        | 1       | 0        | 1       | 0        | 0       | 0       | 1        | 0       | 0       | 0       | 1       | 1        |
| Gordonia          | 1              | 158            | 0        | 0        | 1        | 1       | 0       | 0       | 0        | 0        | 1       | 0        | 1       | 1        | 0       | 1       | 1        | 0       | 1       | 1       | 1       | 1        |
| Gordonibacter     | 1              | 32             | 0        | 0        | 0        | 0       | 0       | 0       | 1        | 0        | 1       | 0        | 0       | 0        | 0       | 0       | 1        | 0       | 0       | 0       | 1       | 0        |
| Gramella          | 2              | 104            | 0        | 0        | 0        | 0       | 1       | 0       | 0        | 0        | 1       | 0        | 1       | 1        | 0       | 1       | 1        | 0       | 0       | 0       | 1       | 1        |
| Granulibacter     | 2              | 90             | 0        | 0        | 0        | 0       | 0       | 1       | 0        | 0        | 1       | 0        | 1       | 1        | 0       | 0       | 1        | 0       | 0       | 0       | 1       | 1        |
| Granulicella      | 2              | 98             | 0        | 0        | 0        | 0       | 0       | 0       | 0        | 0        | 1       | 0        | 1       | 1        | 0       | 0       | 1        | 0       | 0       | 1       | 1       | 1        |
| Grimontia         | 1              | 9              | 0        | 0        | 0        | 0       | 1       | 0       | 0        | 0        | 0       | 0        | 0       | 0        | 0       | 0       | 0        | 0       | 0       | 0       | 0       | 0        |
| Haemophilus       | 2              | 117            | 0        | 0        | 0        | 0       | 1       | 1       | 0        | 0        | 1       | 0        | 1       | 0        | 0       | 1       | 1        | 1       | 0       | 1       | 1       | 1        |
| Hafnia            | 1              | 29             | 0        | 0        | 1        | 0       | 1       | 0       | 0        | 0        | 1       | 0        | 0       | 0        | 0       | 0       | 1        | 1       | 0       | 1       | 0       | 0        |
| Hahella           | 3              | 130            | 0        | 0        | 0        | 0       | 1       | 0       | 0        | 0        | 1       | 1        | 1       | 1        | 0       | 1       | 1        | 0       | 1       | 1       | 1       | 1        |
| Halalkalicoccus   | 1              | 18             | 0        | 0        | 0        | 0       | 0       | 0       | 0        | 0        | 0       | 0        | 0       | 0        | 0       | 0       | 0        | 0       | 0       | 0       | 0       | 0        |
| Halanaerobium     | 2              | 89             | 0        | 0        | 0        | 0       | 0       | 0       | 0        | 0        | 1       | 0        | 1       | 1        | 0       | 1       | 1        | 0       | 0       | 1       | 1       | 1        |
| Haliangium        | 2              | 108            | 0        | 0        | 0        | 0       | 0       | 0       | 0        | 0        | 1       | 1        | 1       | 1        | 0       | 1       | 1        | 0       | 0       | 1       | 1       | 1        |
| Haliscomenobacter | 2              | 107            | 0        | 0        | 0        | 0       | 1       | 0       | 0        | 0        | 1       | 0        | 1       | 0        | 0       | 1       | 1        | 0       | 0       | 1       | 1       | 1        |
| Haloarcula        | 1              | 22             | 0        | 0        | 0        | 0       | 0       | 0       | 0        | 0        | 0       | 0        | 0       | 0        | 0       | 0       | 0        | 0       | 0       | 0       | 0       | 0        |
| Halobacillus      | 1              | 19             | 0        | 0        | 0        | 0       | 0       | 0       | 0        | 0        | 0       | 0        | 0       | 0        | 0       | 0       | 0        | 0       | 0       | 0       | 0       | 0        |
| Halobacteriaceae  | 1              | 1              | 0        | 0        | 0        | 0       | 0       | 0       | 0        | 0        | 0       | 0        | 0       | 0        | 0       | 0       | 0        | 0       | 0       | 0       | 0       | 0        |
| Halobacterium     | 1              | 10             | 0        | 0        | 0        | 0       | 0       | 0       | 0        | 0        | 0       | 0        | 0       | 0        | 0       | 0       | 0        | 0       | 0       | 0       | 0       | 0        |
| Halobacteroides   | 1              | 14             | 0        | 0        | 0        | 0       | 0       | 0       | 0        | 0        | 0       | 0        | 0       | 0        | 0       | 0       | 0        | 0       | 0       | 0       | 0       | 0        |
| Haloferax         | 1              | 20             | 0        | 0        | 0        | 0       | 0       | 0       | 0        | 0        | 0       | 0        | 0       | 0        | 0       | 0       | 0        | 0       | 0       | 0       | 0       | 0        |
| Halogeometricum   | 1              | 12             | 0        | 0        | 0        | 0       | 0       | 0       | 0        | 0        | 0       | 0        | 0       | 0        | 0       | 0       | 0        | 0       | 0       | 0       | 0       | 0        |
| Halomicrobium     | 1              | 10             | 0        | 0        | 0        | 0       | 0       | 0       | 0        | 0        | 0       | 0        | 0       | 0        | 0       | 0       | 0        | 0       | 0       | 0       | 0       | 0        |
| Halomonas         | 1              | 149            | 0        | 0        | 0        | 0       | 1       | 0       | 0        | 0        | 1       | 1        | 1       | 1        | 0       | 1       | 1        | 0       | 1       | 1       | 1       | 1        |
| Halopiger         | 1              | 16             | 0        | 0        | 0        | 0       | 0       | 0       | 0        | 0        | 0       | 0        | 0       | 0        | 0       | 0       | 0        | 0       | 0       | 0       | 0       | 0        |
| Haloquadratum     | 1              | 19             | 0        | 0        | 0        | 0       | 0       | 0       | 0        | 0        | 0       | 0        | 0       | 0        | 0       | 0       | 0        | 0       | 0       | 0       | 0       | 0        |
| Halorhabdus       | 1              | 10             | 0        | 0        | 0        | 0       | 0       | 0       | 0        | 0        | 0       | 0        | 0       | 0        | 0       | 0       | 0        | 0       | 0       | 0       | 0       | 0        |
| Halorhodospira    | 2              | 71             | 0        | 0        | 0        | 0       | 0       | 1       | 0        | 0        | 1       | 0        | 1       | 0        | 0       | 1       | 1        | 0       | 1       | 1       | 0       | 1        |
| Halorubrum        | 1              | 16             | 0        | 0        | 0        | 0       | 0       | 0       | 0        | 0        | 0       | 0        | 0       | 0        | 0       | 0       | 0        | 0       | 0       | 0       | 0       | 0        |
| Haloterrigena     | 1              | 19             | 0        | 0        | 0        | 0       | 0       | 0       | 0        | 0        | 0       | 0        | 0       | 0        | 0       | 0       | 0        | 0       | 0       | 0       | 0       | 0        |
| Halothece         | 1              | 9              | 0        | 0        | 0        | 0       | 0       | 0       | 0        | 0        | 0       | 0        | 0       | 0        | 0       | 0       | 0        | 0       | 0       | 0       | 0       | 0        |
| Halothermothrix   | 2              | 50             | 0        | 0        | 0        | 0       | 0       | 0       | 0        | 0        | 1       | 0        | 1       | 0        | 0       | 0       | 1        | 0       | 0       | 1       | 0       | 0        |
| Halothiobacillus  | 2              | 65             | 0        | 0        | 0        | 0       | 0       | 0       | 0        | 0        | 1       | 0        | 1       | 0        | 0       | 0       | 1        | 0       | 0       | 1       | 1       | 0        |
| Halovivax         | 1              | 12             | 0        | 0        | 0        | 0       | 0       | 0       | 0        | 0        | 0       | 0        | 0       | 0        | 0       | 0       | 0        | 0       | 0       | 0       | 0       | 0        |
| Helicobacter      | 2              | 79             | 0        | 0        | 0        | 0       | 0       | 1       | 0        | 0        | 1       | 0        | 1       | 1        | 0       | 1       | 1        | 0       | 0       | 0       | 1       | 0        |
| Heliobacillus     | 1              | 4              | 0        | 0        | 0        | 0       | 0       | 0       | 0        | 0        | 0       | 0        | 0       | 0        | 0       | 0       | 0        | 0       | 0       | 0       | 0       | 0        |
| Heliobacterium    | 2              | 51             | 0        | 0        | 0        | 0       | 0       | 0       | 0        | 0        | 1       | 0        | 1       | 1        | 0       | 0       | 0        | 0       | 0       | 1       | 1       | 0        |
| Herbaspirillum    | 2              | 172            | 0        | 0        | 0        | 0       | 0       | 0       | 0        | 0        | 1       | 1        | 1       | 1        | 0       | 1       | 1        | 0       | 0       | 0       | 1       | 1        |
| Herminiimonas     | 3              | 89             | 0        | 0        | 0        | 0       | 0       | 1       | 0        | 0        | 1       | 0        | 1       | 0        | 0       | 1       | 1        | 0       | 1       | 0       | 1       | 1        |
| Herpetosiphon     | 3              | 90             | 0        | 0        | 1        | 0       | 0       | 0       | 0        | 0        | 1       | 1        | 1       | 1        | 0       | 1       | 1        | 0       | 0       | 1       | 1       | 1        |
| Hippea            | 2              | 44             | 0        | 0        | 0        | 0       | 0       | 0       | 0        | 0        | 1       | 0        | 1       | 0        | 0       | 1       | 1        | 0       | 0       | 0       | 1       | 0        |
| Hirschia          | 2              | 102            | 0        | 0        | 0        | 0       | 0       | 0       | 0        | 0        | 1       | 0        | 1       | 1        | 0       | 1       | 1        | 0       | 0       | 1       | 1       | 1        |
| Histophilus       | 2              | 72             | 0        | 0        | 0        | 0       | 1       | 1       | 0        | 0        | 1       | 0        | 1       | 0        | 0       | 1       | 0        | 1       | 0       | 1       | 0       | 0        |
| Hoeflea           | 1              | 16             | 0        | 0        | 0        | 0       | 0       | 0       | 0        | 0        | 1       | 0        | 0       | 0        | 0       | 1       | 0        | 0       | 0       | 1       | 0       | 0        |
| Hydrogenivirga    | 1              | 2              | 0        | 0        | 0        | 0       | 0       | 1       | 0        | 0        | 0       | 0        | 0       | 0        | 0       | 0       | 0        | 0       | 0       | 0       | 0       | 0        |
| Hydrogenobacter   | 2              | 55             | 0        | 0        | 0        | 0       | 0       | 0       | 0        | 0        | 1       | 0        | 1       | 0        | 0       | 0       | 1        | 0       | 0       | 1       | 1       | 0        |
| Hydrogenobaculum  | 2              | 44             | 0        | 0        | 0        | 0       | 0       | 1       | 0        | 0        | 1       | 0        | 1       | 0        | 0       | 0       | 1        | 0       | 0       | 1       | 1       | 0        |
| Hydrogenophaga    | 1              | 9              | 0        | 0        | 0        | 0       | 0       | 0       | 0        | 0        | 0       | 0        | 1       | 0        | 0       | 0       | 0        | 0       | 1       | 0       | 0       | 0        |
| Hylemonella       | 1              | 4              | 0        | 0        | 0        | 0       | 0       | 0       | 0        | 0        | 0       | 0        | 0       | 0        | 0       | 0       | 0        | 0       | 0       | 0       | 0       | 0        |

| Genus                 | Cluster Number | Protein Counts | 1.3.1.32 | 1.3.1.56 | 1.3.99.- | 1.4.3.4 | 1.6.5.- | 1.7.1.- | 1.8.99.3 | 1.97.1.8 | 2.1.1.- | 2.1.1.67 | 2.3.1.- | 2.3.1.16 | 2.3.1.5 | 2.3.1.9 | 2.4.2.10 | 2.4.2.3 | 2.4.2.4 | 2.4.2.8 | 2.5.1.- | 2.5.1.18 |
|-----------------------|----------------|----------------|----------|----------|----------|---------|---------|---------|----------|----------|---------|----------|---------|----------|---------|---------|----------|---------|---------|---------|---------|----------|
| Hyperthermus          | 1              | 6              | 0        | 0        | 0        | 0       | 0       | 0       | 0        | 0        | 0       | 0        | 0       | 0        | 0       | 0       | 0        | 0       | 0       | 0       | 0       | 0        |
| Hyphomicrobium        | 2              | 93             | 0        | 0        | 0        | 0       | 0       | 0       | 0        | 0        | 1       | 1        | 1       | 0        | 0       | 1       | 1        | 0       | 0       | 1       | 1       | 1        |
| Hyphomonas            | 3              | 105            | 0        | 0        | 0        | 0       | 0       | 1       | 0        | 0        | 1       | 0        | 1       | 1        | 0       | 1       | 1        | 0       | 0       | 1       | 1       | 1        |
| Ideonella             | 1              | 18             | 0        | 0        | 0        | 0       | 0       | 0       | 0        | 0        | 0       | 0        | 0       | 0        | 0       | 0       | 0        | 0       | 0       | 0       | 0       | 0        |
| Idiomarina            | 2              | 86             | 0        | 0        | 0        | 0       | 1       | 1       | 0        | 0        | 1       | 0        | 1       | 1        | 0       | 0       | 1        | 0       | 1       | 0       | 1       | 1        |
| Ignavibacterium       | 1              | 14             | 0        | 0        | 0        | 0       | 0       | 0       | 0        | 0        | 0       | 0        | 0       | 0        | 0       | 0       | 0        | 0       | 0       | 0       | 0       | 0        |
| Ignicoccus            | 1              | 5              | 0        | 0        | 0        | 0       | 0       | 0       | 0        | 0        | 0       | 0        | 0       | 0        | 0       | 0       | 0        | 0       | 0       | 0       | 0       | 0        |
| Ignisphaera           | 1              | 8              | 0        | 0        | 0        | 0       | 0       | 0       | 0        | 0        | 0       | 0        | 0       | 0        | 0       | 0       | 0        | 0       | 0       | 0       | 0       | 0        |
| Ilyobacter            | 2              | 85             | 0        | 0        | 0        | 0       | 1       | 0       | 0        | 0        | 1       | 0        | 1       | 1        | 0       | 0       | 1        | 0       | 0       | 1       | 0       | 0        |
| Intrasporangium       | 2              | 114            | 0        | 0        | 0        | 0       | 0       | 0       | 1        | 0        | 1       | 0        | 1       | 1        | 0       | 1       | 1        | 0       | 1       | 1       | 1       | 1        |
| Isoptericola          | 1              | 18             | 0        | 0        | 0        | 0       | 0       | 0       | 0        | 0        | 0       | 0        | 0       | 0        | 0       | 0       | 0        | 0       | 0       | 0       | 0       | 0        |
| Isosphaera            | 2              | 75             | 0        | 0        | 0        | 0       | 0       | 0       | 0        | 0        | 1       | 0        | 1       | 0        | 0       | 1       | 1        | 0       | 0       | 1       | 1       | 0        |
| Jannaschia            | 3              | 151            | 0        | 0        | 0        | 0       | 0       | 0       | 0        | 0        | 1       | 0        | 1       | 1        | 0       | 1       | 1        | 0       | 1       | 1       | 1       | 1        |
| Janthinobacterium     | 2              | 99             | 0        | 0        | 0        | 0       | 0       | 1       | 0        | 0        | 1       | 0        | 1       | 1        | 0       | 1       | 1        | 0       | 1       | 0       | 1       | 1        |
| Jonesia               | 2              | 56             | 0        | 0        | 0        | 0       | 0       | 0       | 0        | 0        | 1       | 0        | 1       | 1        | 0       | 0       | 1        | 0       | 1       | 1       | 1       | 1        |
| Joostella             | 1              | 3              | 0        | 0        | 0        | 0       | 1       | 0       | 0        | 0        | 0       | 0        | 0       | 0        | 0       | 0       | 0        | 0       | 0       | 0       | 0       | 0        |
| Kaistia               | 1              | 2              | 0        | 0        | 0        | 0       | 0       | 0       | 0        | 0        | 0       | 0        | 0       | 0        | 0       | 0       | 0        | 0       | 0       | 0       | 0       | 0        |
| Kangiella             | 2              | 84             | 0        | 0        | 0        | 0       | 1       | 0       | 0        | 0        | 1       | 1        | 1       | 0        | 0       | 1       | 1        | 0       | 1       | 1       | 1       | 1        |
| Ketogulonicigenium    | 2              | 102            | 0        | 0        | 0        | 0       | 0       | 0       | 0        | 0        | 1       | 0        | 1       | 0        | 0       | 1       | 1        | 0       | 1       | 1       | 1       | 1        |
| Kineococcus           | 1              | 24             | 0        | 0        | 0        | 0       | 0       | 0       | 0        | 0        | 0       | 0        | 0       | 0        | 0       | 0       | 0        | 0       | 0       | 0       | 0       | 0        |
| Kinetoplastibacterium | 1              | 2              | 0        | 0        | 0        | 0       | 0       | 0       | 0        | 0        | 0       | 0        | 0       | 0        | 0       | 0       | 0        | 0       | 0       | 0       | 0       | 0        |
| Kingella              | 1              | 4              | 0        | 0        | 0        | 0       | 0       | 0       | 0        | 0        | 0       | 0        | 0       | 0        | 0       | 0       | 0        | 0       | 0       | 0       | 0       | 0        |
| Kitasatospora         | 1              | 36             | 0        | 0        | 0        | 0       | 0       | 0       | 0        | 0        | 0       | 0        | 0       | 0        | 0       | 0       | 0        | 0       | 0       | 0       | 0       | 0        |
| Klebsiella            | 3              | 222            | 0        | 0        | 0        | 0       | 1       | 1       | 0        | 0        | 1       | 0        | 1       | 1        | 0       | 1       | 1        | 1       | 1       | 1       | 1       | 1        |
| Kluyvera              | 1              | 1              | 0        | 0        | 0        | 0       | 0       | 0       | 0        | 0        | 0       | 0        | 0       | 0        | 0       | 0       | 0        | 0       | 0       | 0       | 0       | 0        |
| Kocuria               | 2              | 87             | 0        | 0        | 0        | 1       | 0       | 0       | 0        | 0        | 1       | 0        | 1       | 1        | 0       | 1       | 1        | 0       | 1       | 1       | 1       | 0        |
| Kordia                | 1              | 5              | 0        | 0        | 0        | 0       | 1       | 0       | 0        | 0        | 0       | 0        | 0       | 0        | 0       | 1       | 0        | 0       | 0       | 0       | 0       | 0        |
| Kosmotoga             | 2              | 61             | 0        | 0        | 0        | 0       | 0       | 0       | 0        | 0        | 1       | 0        | 1       | 1        | 0       | 0       | 0        | 1       | 0       | 1       | 1       | 0        |
| Kribbella             | 2              | 99             | 0        | 0        | 0        | 0       | 0       | 0       | 0        | 0        | 1       | 0        | 1       | 1        | 0       | 1       | 1        | 0       | 1       | 1       | 1       | 1        |
| Krokinobacter         | 2              | 90             | 0        | 0        | 0        | 0       | 1       | 0       | 0        | 0        | 1       | 0        | 1       | 0        | 0       | 1       | 1        | 0       | 0       | 0       | 1       | 0        |
| Kyrpidia              | 2              | 113            | 0        | 0        | 0        | 0       | 1       | 0       | 0        | 0        | 1       | 0        | 1       | 1        | 0       | 1       | 1        | 0       | 0       | 1       | 1       | 0        |
| Kytococcus            | 2              | 70             | 0        | 0        | 0        | 0       | 0       | 0       | 0        | 0        | 1       | 0        | 1       | 1        | 0       | 1       | 1        | 0       | 1       | 1       | 1       | 0        |
| Labrenzia             | 1              | 4              | 0        | 0        | 0        | 0       | 1       | 0       | 0        | 0        | 0       | 0        | 0       | 0        | 0       | 0       | 0        | 0       | 0       | 0       | 0       | 0        |
| Lachnoanaerobaculum   | 1              | 1              | 0        | 0        | 0        | 0       | 0       | 0       | 0        | 0        | 0       | 0        | 0       | 0        | 0       | 0       | 0        | 0       | 0       | 0       | 0       | 0        |
| Lachnospiraceae       | 1              | 51             | 0        | 0        | 0        | 0       | 0       | 0       | 0        | 0        | 1       | 0        | 1       | 1        | 0       | 0       | 1        | 0       | 0       | 0       | 0       | 0        |
| Lacinutrix            | 1              | 20             | 0        | 0        | 0        | 0       | 0       | 0       | 0        | 0        | 0       | 0        | 0       | 0        | 0       | 1       | 0        | 0       | 0       | 0       | 0       | 0        |
| Lactobacillus         | 2              | 119            | 0        | 0        | 0        | 0       | 0       | 0       | 0        | 0        | 1       | 0        | 1       | 1        | 0       | 1       | 1        | 1       | 0       | 1       | 1       | 1        |
| Lactococcus           | 2              | 82             | 0        | 0        | 0        | 0       | 0       | 0       | 0        | 0        | 1       | 0        | 1       | 1        | 0       | 1       | 1        | 0       | 0       | 1       | 1       | 0        |
| Lamprocystis          | 1              | 2              | 0        | 0        | 0        | 0       | 0       | 0       | 0        | 0        | 0       | 0        | 0       | 0        | 0       | 0       | 0        | 0       | 0       | 0       | 0       | 0        |
| Laribacter            | 2              | 80             | 0        | 0        | 0        | 0       | 0       | 0       | 0        | 0        | 1       | 0        | 1       | 1        | 0       | 1       | 1        | 0       | 0       | 1       | 1       | 1        |
| Lawsonia              | 2              | 33             | 0        | 0        | 0        | 0       | 0       | 1       | 1        | 0        | 1       | 0        | 1       | 0        | 0       | 0       | 1        | 0       | 0       | 0       | 0       | 0        |
| Leadbetterella        | 2              | 79             | 0        | 0        | 0        | 0       | 0       | 0       | 0        | 0        | 1       | 0        | 1       | 0        | 0       | 1       | 1        | 0       | 0       | 1       | 1       | 1        |
| Leeuwenhoekiiella     | 1              | 2              | 0        | 0        | 0        | 0       | 1       | 0       | 0        | 0        | 0       | 0        | 0       | 0        | 0       | 0       | 0        | 0       | 0       | 0       | 0       | 0        |
| Legionella            | 2              | 117            | 0        | 0        | 1        | 0       | 0       | 1       | 0        | 0        | 1       | 1        | 1       | 1        | 0       | 1       | 1        | 0       | 1       | 1       | 1       | 1        |
| Leifsonia             | 2              | 48             | 0        | 0        | 0        | 0       | 0       | 0       | 0        | 0        | 1       | 0        | 1       | 1        | 0       | 1       | 1        | 0       | 1       | 1       | 1       | 0        |
| Leptolyngbya          | 1              | 10             | 0        | 0        | 0        | 0       | 0       | 0       | 0        | 0        | 0       | 0        | 0       | 0        | 0       | 0       | 0        | 0       | 0       | 0       | 0       | 0        |
| Leptospira            | 2              | 76             | 0        | 0        | 0        | 0       | 0       | 0       | 0        | 0        | 1       | 1        | 1       | 0        | 0       | 1       | 1        | 0       | 0       | 1       | 1       | 1        |
| Leptospirillum        | 1              | 10             | 0        | 0        | 0        | 0       | 0       | 0       | 0        | 0        | 0       | 0        | 0       | 0        | 0       | 0       | 0        | 0       | 0       | 0       | 0       | 0        |
| Leptothrix            | 3              | 186            | 0        | 0        | 0        | 0       | 0       | 0       | 0        | 0        | 1       | 0        | 1       | 1        | 0       | 1       | 1        | 0       | 1       | 0       | 1       | 1        |
| Leptotrichia          | 2              | 43             | 0        | 0        | 0        | 0       | 0       | 0       | 0        | 0        | 1       | 0        | 1       | 0        | 0       | 0       | 1        | 0       | 0       | 1       | 0       | 0        |
| Leucobacter           | 1              | 2              | 0        | 0        | 0        | 0       | 0       | 0       | 0        | 0        | 0       | 0        | 0       | 0        | 0       | 0       | 0        | 0       | 0       | 0       | 0       | 0        |
| Leuconostoc           | 2              | 64             | 0        | 0        | 0        | 0       | 0       | 0       | 0        | 0        | 1       | 0        | 1       | 0        | 0       | 1       | 1        | 0       | 0       | 1       | 1       | 0        |

| Genus                | Cluster Number | Protein Counts | 1.3.1.32 | 1.3.1.56 | 1.3.99.- | 1.4.3.4 | 1.6.5.- | 1.7.1.- | 1.8.99.3 | 1.97.1.8 | 2.1.1.- | 2.1.1.67 | 2.3.1.- | 2.3.1.16 | 2.3.1.5 | 2.3.1.9 | 2.4.2.10 | 2.4.2.3 | 2.4.2.4 | 2.4.2.8 | 2.5.1.- | 2.5.1.18 |
|----------------------|----------------|----------------|----------|----------|----------|---------|---------|---------|----------|----------|---------|----------|---------|----------|---------|---------|----------|---------|---------|---------|---------|----------|
| Liberibacter         | 1              | 4              | 0        | 0        | 0        | 0       | 0       | 0       | 0        | 0        | 0       | 0        | 0       | 0        | 0       | 0       | 0        | 0       | 0       | 0       | 0       | 0        |
| Limnohabitans        | 1              | 11             | 0        | 0        | 0        | 0       | 0       | 0       | 0        | 0        | 0       | 0        | 0       | 0        | 0       | 0       | 0        | 0       | 0       | 0       | 0       | 0        |
| Listeria             | 2              | 77             | 0        | 0        | 0        | 0       | 0       | 0       | 0        | 0        | 1       | 0        | 1       | 1        | 0       | 1       | 1        | 0       | 0       | 1       | 1       | 0        |
| Listeriaceae         | 1              | 6              | 0        | 0        | 0        | 0       | 0       | 0       | 0        | 0        | 0       | 0        | 0       | 0        | 0       | 0       | 0        | 0       | 0       | 0       | 0       | 0        |
| Listonella           | 1              | 38             | 0        | 0        | 0        | 0       | 1       | 0       | 0        | 0        | 1       | 0        | 0       | 0        | 0       | 1       | 1        | 1       | 0       | 1       | 0       | 0        |
| Loktanella           | 1              | 3              | 0        | 0        | 0        | 0       | 0       | 0       | 0        | 0        | 0       | 0        | 0       | 0        | 0       | 0       | 0        | 0       | 0       | 0       | 0       | 0        |
| Lysinibacillus       | 2              | 97             | 0        | 0        | 0        | 0       | 0       | 0       | 0        | 0        | 1       | 0        | 1       | 1        | 0       | 0       | 1        | 0       | 0       | 1       | 1       | 0        |
| Macrococcus          | 2              | 60             | 0        | 0        | 0        | 0       | 0       | 0       | 0        | 0        | 1       | 0        | 1       | 0        | 0       | 0       | 1        | 0       | 0       | 1       | 1       | 0        |
| Magnetococcus        | 2              | 64             | 0        | 0        | 0        | 0       | 0       | 1       | 0        | 0        | 1       | 1        | 1       | 1        | 0       | 1       | 1        | 0       | 0       | 1       | 0       | 1        |
| Magnetospirillum     | 2              | 113            | 0        | 0        | 0        | 0       | 0       | 1       | 0        | 0        | 1       | 0        | 1       | 1        | 0       | 1       | 1        | 0       | 0       | 0       | 1       | 1        |
| Mahella              | 2              | 58             | 0        | 0        | 0        | 0       | 0       | 0       | 0        | 0        | 1       | 0        | 1       | 0        | 0       | 0       | 1        | 0       | 0       | 1       | 1       | 0        |
| Mannheimia           | 2              | 85             | 0        | 0        | 0        | 0       | 1       | 1       | 0        | 0        | 1       | 0        | 1       | 0        | 0       | 0       | 1        | 1       | 0       | 1       | 0       | 1        |
| Maribacter           | 3              | 87             | 0        | 0        | 0        | 0       | 1       | 0       | 0        | 0        | 1       | 0        | 1       | 0        | 0       | 1       | 1        | 0       | 0       | 0       | 1       | 0        |
| Maricaulis           | 3              | 87             | 0        | 0        | 0        | 1       | 0       | 1       | 0        | 0        | 1       | 0        | 1       | 1        | 0       | 1       | 1        | 0       | 1       | 1       | 1       | 1        |
| Marichromatium       | 1              | 2              | 0        | 0        | 0        | 0       | 0       | 0       | 0        | 0        | 0       | 0        | 0       | 0        | 0       | 0       | 0        | 0       | 0       | 0       | 0       | 0        |
| Marinithermus        | 2              | 77             | 0        | 0        | 0        | 0       | 0       | 0       | 0        | 0        | 1       | 0        | 1       | 1        | 0       | 1       | 1        | 0       | 0       | 1       | 0       | 0        |
| Marinitoga           | 1              | 15             | 0        | 0        | 0        | 0       | 0       | 0       | 0        | 0        | 0       | 0        | 0       | 0        | 0       | 0       | 0        | 0       | 0       | 0       | 0       | 0        |
| Marinobacter         | 2              | 163            | 0        | 0        | 0        | 0       | 1       | 1       | 0        | 0        | 1       | 1        | 1       | 1        | 0       | 1       | 1        | 0       | 1       | 1       | 1       | 1        |
| Marinomonas          | 3              | 192            | 0        | 0        | 0        | 0       | 1       | 1       | 0        | 0        | 1       | 1        | 1       | 1        | 0       | 1       | 1        | 0       | 0       | 1       | 1       | 1        |
| Maritimibacter       | 1              | 7              | 0        | 0        | 0        | 0       | 1       | 0       | 0        | 0        | 0       | 0        | 1       | 0        | 0       | 0       | 0        | 0       | 0       | 0       | 0       | 0        |
| Marivirga            | 2              | 96             | 0        | 0        | 0        | 0       | 1       | 0       | 0        | 0        | 1       | 0        | 1       | 1        | 0       | 1       | 1        | 0       | 1       | 1       | 1       | 1        |
| Martelella           | 1              | 3              | 0        | 0        | 0        | 0       | 0       | 0       | 0        | 0        | 0       | 0        | 0       | 0        | 0       | 0       | 0        | 0       | 0       | 0       | 0       | 0        |
| Marvinbryantia       | 1              | 1              | 0        | 0        | 0        | 0       | 0       | 0       | 0        | 0        | 1       | 0        | 0       | 0        | 0       | 0       | 0        | 0       | 0       | 0       | 0       | 0        |
| Massilia             | 1              | 4              | 0        | 0        | 0        | 0       | 0       | 0       | 0        | 0        | 0       | 0        | 0       | 0        | 0       | 0       | 0        | 0       | 0       | 0       | 0       | 0        |
| Mastigocladopsis     | 1              | 16             | 0        | 0        | 0        | 0       | 0       | 1       | 0        | 0        | 0       | 0        | 0       | 0        | 0       | 0       | 0        | 0       | 0       | 0       | 0       | 0        |
| Megamonas            | 1              | 47             | 0        | 0        | 0        | 0       | 0       | 0       | 0        | 0        | 1       | 0        | 1       | 0        | 0       | 0       | 1        | 0       | 0       | 1       | 1       | 0        |
| Megasphaera          | 1              | 14             | 0        | 0        | 0        | 0       | 0       | 0       | 0        | 0        | 0       | 0        | 0       | 0        | 0       | 0       | 0        | 0       | 0       | 0       | 0       | 0        |
| Meiothermus          | 2              | 110            | 0        | 0        | 0        | 0       | 0       | 0       | 0        | 0        | 1       | 0        | 1       | 1        | 0       | 1       | 1        | 1       | 0       | 1       | 1       | 0        |
| Melissococcus        | 2              | 46             | 0        | 0        | 0        | 0       | 0       | 0       | 0        | 0        | 1       | 0        | 1       | 0        | 0       | 0       | 1        | 0       | 0       | 1       | 1       | 0        |
| Mesoflavibacter      | 1              | 6              | 0        | 0        | 0        | 0       | 1       | 0       | 0        | 0        | 0       | 0        | 0       | 0        | 0       | 1       | 0        | 0       | 0       | 0       | 0       | 0        |
| Mesoplasma           | 1              | 23             | 0        | 0        | 0        | 0       | 0       | 0       | 0        | 0        | 1       | 0        | 1       | 0        | 0       | 0       | 0        | 0       | 1       | 1       | 0       | 0        |
| Mesorhizobium        | 2              | 201            | 0        | 0        | 0        | 0       | 0       | 1       | 0        | 0        | 1       | 0        | 1       | 1        | 1       | 1       | 1        | 0       | 1       | 1       | 1       | 1        |
| Mesotoga             | 1              | 14             | 0        | 0        | 0        | 0       | 0       | 0       | 0        | 0        | 0       | 0        | 0       | 0        | 0       | 0       | 0        | 0       | 0       | 0       | 0       | 0        |
| Metallosphaera       | 1              | 18             | 0        | 0        | 0        | 0       | 0       | 0       | 0        | 0        | 0       | 0        | 0       | 0        | 0       | 0       | 0        | 0       | 0       | 0       | 0       | 0        |
| Methanobacterium     | 1              | 7              | 0        | 0        | 0        | 0       | 0       | 0       | 0        | 0        | 0       | 0        | 0       | 0        | 0       | 0       | 0        | 0       | 0       | 0       | 0       | 0        |
| Methanobrevibacter   | 1              | 9              | 0        | 0        | 0        | 0       | 0       | 0       | 0        | 0        | 0       | 0        | 0       | 0        | 0       | 0       | 0        | 0       | 0       | 0       | 0       | 0        |
| Methanocaldococcus   | 1              | 6              | 0        | 0        | 0        | 0       | 0       | 0       | 0        | 0        | 0       | 0        | 0       | 0        | 0       | 0       | 0        | 0       | 0       | 0       | 0       | 0        |
| Methanocella         | 1              | 15             | 0        | 0        | 0        | 0       | 0       | 0       | 0        | 0        | 0       | 0        | 0       | 0        | 0       | 0       | 0        | 0       | 0       | 0       | 0       | 0        |
| Methanococcaceae     | 1              | 1              | 0        | 0        | 0        | 0       | 0       | 0       | 0        | 0        | 0       | 0        | 0       | 0        | 0       | 0       | 0        | 0       | 0       | 0       | 0       | 0        |
| Methanococcoides     | 1              | 5              | 0        | 0        | 0        | 0       | 0       | 0       | 0        | 0        | 0       | 0        | 0       | 0        | 0       | 0       | 0        | 0       | 0       | 0       | 0       | 0        |
| Methanococcus        | 1              | 9              | 0        | 0        | 0        | 0       | 0       | 0       | 0        | 0        | 0       | 0        | 0       | 0        | 0       | 0       | 0        | 0       | 0       | 0       | 0       | 0        |
| Methanocorpusculum   | 1              | 7              | 0        | 0        | 0        | 0       | 0       | 0       | 0        | 0        | 0       | 0        | 0       | 0        | 0       | 0       | 0        | 0       | 0       | 0       | 0       | 0        |
| Methanoculleus       | 1              | 8              | 0        | 0        | 0        | 0       | 0       | 0       | 0        | 0        | 0       | 0        | 0       | 0        | 0       | 0       | 0        | 0       | 0       | 0       | 0       | 0        |
| Methanohalobium      | 1              | 5              | 0        | 0        | 0        | 0       | 0       | 0       | 0        | 0        | 0       | 0        | 0       | 0        | 0       | 0       | 0        | 0       | 0       | 0       | 0       | 0        |
| Methanohalophilus    | 1              | 5              | 0        | 0        | 0        | 0       | 0       | 0       | 0        | 0        | 0       | 0        | 0       | 0        | 0       | 0       | 0        | 0       | 0       | 0       | 0       | 0        |
| Methanolobus         | 1              | 5              | 0        | 0        | 0        | 0       | 0       | 0       | 0        | 0        | 0       | 0        | 0       | 0        | 0       | 0       | 0        | 0       | 0       | 0       | 0       | 0        |
| Methanomethylovorans | 1              | 5              | 0        | 0        | 0        | 0       | 0       | 0       | 0        | 0        | 0       | 0        | 0       | 0        | 0       | 0       | 0        | 0       | 0       | 0       | 0       | 0        |
| Methanoplanus        | 1              | 7              | 0        | 0        | 0        | 0       | 0       | 0       | 0        | 0        | 0       | 0        | 0       | 0        | 0       | 0       | 0        | 0       | 0       | 0       | 0       | 0        |
| Methanopyrus         | 1              | 4              | 0        | 0        | 0        | 0       | 0       | 0       | 0        | 0        | 0       | 0        | 0       | 0        | 0       | 0       | 0        | 0       | 0       | 0       | 0       | 0        |
| Methanoregula        | 1              | 8              | 0        | 0        | 0        | 0       | 0       | 0       | 0        | 0        | 0       | 0        | 0       | 0        | 0       | 0       | 0        | 0       | 0       | 0       | 0       | 0        |
| Methanosaeta         | 1              | 9              | 0        | 0        | 0        | 0       | 0       | 0       | 0        | 0        | 0       | 0        | 0       | 0        | 0       | 0       | 0        | 0       | 0       | 0       | 0       | 0        |
| Methanosalsum        | 1              | 7              | 0        | 0        | 0        | 0       | 0       | 0       | 0        | 0        | 0       | 0        | 0       | 0        | 0       | 0       | 0        | 0       | 0       | 0       | 0       | 0        |

| Genus               | Cluster Number | Protein Counts | 1.3.1.32 | 1.3.1.56 | 1.3.99.- | 1.4.3.4 | 1.6.5.- | 1.7.1.- | 1.8.99.3 | 1.97.1.8 | 2.1.1.- | 2.1.1.67 | 2.3.1.- | 2.3.1.16 | 2.3.1.5 | 2.3.1.9 | 2.4.2.10 | 2.4.2.3 | 2.4.2.4 | 2.4.2.8 | 2.5.1.- | 2.5.1.18 |
|---------------------|----------------|----------------|----------|----------|----------|---------|---------|---------|----------|----------|---------|----------|---------|----------|---------|---------|----------|---------|---------|---------|---------|----------|
| Methanosarcina      | 1              | 18             | 0        | 0        | 0        | 0       | 0       | 0       | 0        | 0        | 0       | 0        | 0       | 0        | 0       | 0       | 0        | 0       | 0       | 0       | 0       | 0        |
| Methanospaera       | 1              | 7              | 0        | 0        | 0        | 0       | 0       | 0       | 0        | 0        | 0       | 0        | 0       | 0        | 0       | 0       | 0        | 0       | 0       | 0       | 0       | 0        |
| Methanospaerula     | 1              | 8              | 0        | 0        | 0        | 0       | 0       | 0       | 0        | 0        | 0       | 0        | 0       | 0        | 0       | 0       | 0        | 0       | 0       | 0       | 0       | 0        |
| Methanospirillum    | 1              | 6              | 0        | 0        | 0        | 0       | 0       | 0       | 0        | 0        | 0       | 0        | 0       | 0        | 0       | 0       | 0        | 0       | 0       | 0       | 0       | 0        |
| Methanothermobacter | 1              | 6              | 0        | 0        | 0        | 0       | 0       | 0       | 0        | 0        | 0       | 0        | 0       | 0        | 0       | 0       | 0        | 0       | 0       | 0       | 0       | 0        |
| Methanothermococcus | 1              | 5              | 0        | 0        | 0        | 0       | 0       | 0       | 0        | 0        | 0       | 0        | 0       | 0        | 0       | 0       | 0        | 0       | 0       | 0       | 0       | 0        |
| Methanothermus      | 1              | 5              | 0        | 0        | 0        | 0       | 0       | 0       | 0        | 0        | 0       | 0        | 0       | 0        | 0       | 0       | 0        | 0       | 0       | 0       | 0       | 0        |
| Methanotorris       | 1              | 5              | 0        | 0        | 0        | 0       | 0       | 0       | 0        | 0        | 0       | 0        | 0       | 0        | 0       | 0       | 0        | 0       | 0       | 0       | 0       | 0        |
| Methylacidiphilum   | 2              | 48             | 0        | 0        | 0        | 0       | 0       | 0       | 0        | 0        | 1       | 0        | 1       | 0        | 0       | 0       | 1        | 0       | 0       | 1       | 1       | 0        |
| Methylarcula        | 1              | 2              | 0        | 0        | 0        | 0       | 0       | 0       | 0        | 0        | 0       | 0        | 0       | 0        | 0       | 0       | 0        | 0       | 0       | 0       | 0       | 0        |
| Methylibium         | 1              | 38             | 0        | 0        | 0        | 0       | 0       | 0       | 0        | 0        | 0       | 0        | 0       | 0        | 0       | 0       | 0        | 0       | 0       | 0       | 0       | 0        |
| Methylobacillus     | 2              | 61             | 0        | 0        | 0        | 0       | 0       | 0       | 0        | 0        | 1       | 0        | 1       | 0        | 0       | 0       | 1        | 0       | 0       | 1       | 1       | 0        |
| Methylobacterium    | 3              | 236            | 0        | 0        | 0        | 0       | 0       | 1       | 0        | 0        | 1       | 0        | 1       | 1        | 0       | 1       | 1        | 1       | 1       | 1       | 1       | 1        |
| Methylocella        | 3              | 117            | 0        | 0        | 0        | 0       | 0       | 1       | 0        | 0        | 1       | 0        | 1       | 0        | 0       | 1       | 1        | 0       | 0       | 0       | 1       | 1        |
| Methylococcus       | 2              | 80             | 0        | 0        | 0        | 0       | 1       | 1       | 0        | 0        | 1       | 1        | 1       | 0        | 0       | 0       | 1        | 0       | 1       | 1       | 1       | 1        |
| Methylocystis       | 1              | 21             | 0        | 0        | 0        | 0       | 0       | 0       | 0        | 0        | 0       | 0        | 0       | 0        | 0       | 0       | 0        | 0       | 0       | 0       | 0       | 0        |
| Methyloferula       | 1              | 2              | 0        | 0        | 0        | 0       | 0       | 0       | 0        | 0        | 0       | 0        | 0       | 0        | 0       | 0       | 0        | 0       | 0       | 0       | 0       | 0        |
| Methylomicrobium    | 1              | 12             | 0        | 0        | 0        | 0       | 0       | 0       | 0        | 0        | 0       | 0        | 0       | 0        | 0       | 0       | 0        | 0       | 0       | 0       | 0       | 0        |
| Methylomonas        | 1              | 15             | 0        | 0        | 0        | 0       | 0       | 0       | 0        | 0        | 0       | 0        | 0       | 0        | 0       | 0       | 0        | 0       | 0       | 0       | 0       | 0        |
| Methylophaga        | 1              | 7              | 0        | 0        | 0        | 0       | 0       | 0       | 0        | 0        | 0       | 0        | 0       | 0        | 0       | 0       | 0        | 0       | 0       | 0       | 0       | 0        |
| Methylophilus       | 1              | 2              | 0        | 0        | 0        | 0       | 0       | 0       | 0        | 0        | 0       | 0        | 0       | 0        | 0       | 0       | 0        | 0       | 0       | 0       | 0       | 0        |
| Methylosinus        | 1              | 2              | 0        | 0        | 0        | 0       | 0       | 0       | 0        | 0        | 0       | 0        | 0       | 0        | 0       | 0       | 0        | 0       | 0       | 0       | 0       | 0        |
| Methylotenera       | 2              | 72             | 0        | 0        | 0        | 0       | 0       | 0       | 0        | 0        | 1       | 1        | 1       | 0        | 0       | 0       | 1        | 0       | 0       | 1       | 1       | 0        |
| Methyloversatilis   | 1              | 5              | 0        | 0        | 0        | 0       | 0       | 0       | 0        | 0        | 0       | 0        | 0       | 0        | 0       | 0       | 0        | 0       | 0       | 0       | 0       | 0        |
| Methylovorus        | 2              | 66             | 0        | 0        | 0        | 0       | 0       | 0       | 0        | 0        | 1       | 1        | 1       | 0        | 0       | 0       | 1        | 0       | 0       | 1       | 1       | 0        |
| Micavibrio          | 1              | 9              | 0        | 0        | 0        | 0       | 0       | 0       | 0        | 0        | 0       | 0        | 0       | 0        | 0       | 0       | 0        | 0       | 0       | 0       | 0       | 0        |
| Microbacterium      | 2              | 115            | 0        | 0        | 0        | 0       | 0       | 0       | 0        | 0        | 1       | 0        | 1       | 1        | 0       | 1       | 1        | 0       | 1       | 1       | 1       | 1        |
| Microchaete         | 1              | 23             | 0        | 0        | 0        | 0       | 0       | 1       | 0        | 0        | 1       | 0        | 0       | 0        | 0       | 0       | 0        | 0       | 0       | 0       | 0       | 0        |
| Micrococcus         | 2              | 72             | 0        | 0        | 0        | 0       | 0       | 0       | 0        | 0        | 1       | 0        | 1       | 0        | 0       | 1       | 1        | 0       | 1       | 1       | 1       | 0        |
| Microcoleus         | 1              | 17             | 0        | 0        | 0        | 0       | 0       | 0       | 0        | 0        | 0       | 0        | 0       | 0        | 0       | 0       | 0        | 0       | 0       | 0       | 0       | 0        |
| Microcystis         | 2              | 67             | 0        | 0        | 0        | 1       | 0       | 1       | 0        | 0        | 1       | 0        | 1       | 0        | 0       | 1       | 1        | 1       | 0       | 0       | 1       | 0        |
| Microlunatus        | 1              | 25             | 0        | 0        | 0        | 0       | 0       | 0       | 0        | 0        | 0       | 0        | 0       | 0        | 0       | 0       | 0        | 0       | 0       | 0       | 0       | 0        |
| Micromonospora      | 2              | 115            | 0        | 0        | 0        | 1       | 0       | 0       | 0        | 0        | 1       | 0        | 1       | 1        | 0       | 1       | 1        | 0       | 1       | 1       | 1       | 1        |
| Microvirga          | 1              | 6              | 0        | 0        | 0        | 0       | 0       | 0       | 0        | 0        | 0       | 0        | 0       | 0        | 0       | 0       | 0        | 0       | 0       | 0       | 0       | 0        |
| Mobiluncus          | 1              | 41             | 0        | 0        | 0        | 0       | 0       | 0       | 0        | 0        | 1       | 0        | 1       | 0        | 0       | 0       | 1        | 0       | 0       | 1       | 0       | 0        |
| Modestobacter       | 1              | 43             | 0        | 0        | 0        | 0       | 0       | 0       | 0        | 0        | 0       | 0        | 0       | 0        | 0       | 0       | 0        | 0       | 0       | 0       | 0       | 0        |
| Moorea              | 1              | 2              | 0        | 0        | 0        | 0       | 0       | 0       | 0        | 0        | 0       | 0        | 0       | 0        | 0       | 0       | 0        | 0       | 0       | 0       | 0       | 0        |
| Moorella            | 2              | 69             | 0        | 0        | 0        | 0       | 0       | 0       | 1        | 0        | 1       | 0        | 1       | 0        | 0       | 1       | 1        | 0       | 0       | 1       | 0       | 0        |
| Moraxella           | 2              | 66             | 0        | 0        | 0        | 0       | 1       | 0       | 0        | 0        | 1       | 0        | 1       | 1        | 0       | 0       | 1        | 0       | 0       | 1       | 1       | 1        |
| Morganella          | 1              | 29             | 0        | 0        | 0        | 0       | 1       | 0       | 0        | 0        | 0       | 0        | 0       | 0        | 0       | 0       | 0        | 0       | 0       | 0       | 0       | 0        |
| Moritella           | 1              | 2              | 0        | 0        | 0        | 0       | 0       | 0       | 0        | 0        | 0       | 0        | 0       | 0        | 0       | 0       | 0        | 0       | 0       | 0       | 0       | 0        |
| Muricauda           | 1              | 23             | 0        | 0        | 0        | 0       | 1       | 0       | 0        | 0        | 0       | 0        | 0       | 0        | 0       | 0       | 0        | 0       | 0       | 0       | 0       | 0        |
| Mycobacterium       | 3              | 306            | 1        | 1        | 1        | 1       | 0       | 0       | 0        | 0        | 1       | 0        | 1       | 1        | 1       | 1       | 1        | 1       | 1       | 1       | 1       | 1        |
| Mycoplasma          | 1              | 53             | 0        | 0        | 0        | 0       | 0       | 0       | 0        | 0        | 1       | 0        | 1       | 0        | 0       | 0       | 1        | 0       | 1       | 1       | 0       | 0        |
| Myxococcus          | 2              | 110            | 0        | 0        | 0        | 0       | 0       | 0       | 0        | 0        | 1       | 0        | 1       | 1        | 0       | 1       | 1        | 0       | 0       | 1       | 1       | 1        |
| Nakamurella         | 2              | 115            | 0        | 0        | 0        | 0       | 0       | 0       | 0        | 0        | 1       | 0        | 1       | 1        | 0       | 1       | 1        | 0       | 1       | 1       | 1       | 1        |
| napthalene          | 1              | 2              | 0        | 0        | 0        | 0       | 0       | 0       | 0        | 0        | 0       | 0        | 0       | 0        | 0       | 0       | 0        | 0       | 0       | 0       | 0       | 0        |
| Natranaerobius      | 2              | 55             | 0        | 0        | 0        | 0       | 1       | 0       | 0        | 0        | 1       | 0        | 1       | 1        | 0       | 0       | 1        | 0       | 0       | 1       | 0       | 0        |
| Natrialba           | 1              | 16             | 0        | 0        | 0        | 0       | 0       | 0       | 0        | 0        | 0       | 0        | 0       | 0        | 0       | 0       | 0        | 0       | 0       | 0       | 0       | 0        |
| Natrinema           | 1              | 16             | 0        | 0        | 0        | 0       | 0       | 0       | 0        | 0        | 0       | 0        | 0       | 0        | 0       | 0       | 0        | 0       | 0       | 0       | 0       | 0        |
| Natronobacterium    | 1              | 11             | 0        | 0        | 0        | 0       | 0       | 0       | 0        | 0        | 0       | 0        | 0       | 0        | 0       | 0       | 0        | 0       | 0       | 0       | 0       | 0        |
| Natronococcus       | 1              | 21             | 0        | 0        | 0        | 0       | 0       | 0       | 0        | 0        | 0       | 0        | 0       | 0        | 0       | 0       | 0        | 0       | 0       | 0       | 0       | 0        |

| Genus             | Cluster Number | Protein Counts | 1.3.1.32 | 1.3.1.56 | 1.3.99.- | 1.4.3.4 | 1.6.5.- | 1.7.1.- | 1.8.99.3 | 1.97.1.8 | 2.1.1.- | 2.1.1.67 | 2.3.1.- | 2.3.1.16 | 2.3.1.5 | 2.3.1.9 | 2.4.2.10 | 2.4.2.3 | 2.4.2.4 | 2.4.2.8 | 2.5.1.- | 2.5.1.18 |
|-------------------|----------------|----------------|----------|----------|----------|---------|---------|---------|----------|----------|---------|----------|---------|----------|---------|---------|----------|---------|---------|---------|---------|----------|
| Natronomonas      | 1              | 20             | 0        | 0        | 0        | 0       | 0       | 0       | 0        | 0        | 0       | 0        | 0       | 0        | 0       | 0       | 0        | 0       | 0       | 0       | 0       | 0        |
| Nautilia          | 2              | 48             | 0        | 0        | 0        | 0       | 0       | 0       | 0        | 0        | 1       | 0        | 1       | 0        | 0       | 0       | 1        | 0       | 0       | 0       | 1       | 0        |
| Neisseria         | 2              | 67             | 0        | 0        | 0        | 0       | 1       | 1       | 0        | 0        | 1       | 0        | 1       | 0        | 0       | 0       | 1        | 0       | 0       | 1       | 1       | 0        |
| Neisseriaceae     | 1              | 1              | 0        | 0        | 0        | 0       | 0       | 0       | 0        | 0        | 0       | 0        | 0       | 0        | 0       | 0       | 0        | 0       | 0       | 0       | 0       | 0        |
| Neorickettsia     | 1              | 31             | 0        | 0        | 0        | 0       | 0       | 0       | 0        | 0        | 1       | 0        | 1       | 0        | 0       | 0       | 1        | 0       | 0       | 0       | 1       | 0        |
| Neptuniibacter    | 1              | 2              | 0        | 0        | 0        | 0       | 0       | 0       | 0        | 0        | 0       | 0        | 0       | 0        | 0       | 0       | 0        | 0       | 0       | 0       | 0       | 0        |
| Niastella         | 1              | 21             | 0        | 0        | 0        | 0       | 0       | 0       | 0        | 0        | 0       | 0        | 0       | 0        | 0       | 0       | 0        | 0       | 0       | 0       | 0       | 0        |
| Nitratifractor    | 2              | 54             | 0        | 0        | 0        | 0       | 0       | 0       | 0        | 0        | 1       | 0        | 1       | 0        | 0       | 0       | 1        | 0       | 0       | 0       | 1       | 0        |
| Nitratireductor   | 1              | 19             | 0        | 0        | 0        | 0       | 1       | 0       | 0        | 0        | 1       | 0        | 0       | 0        | 0       | 1       | 0        | 0       | 0       | 0       | 0       | 0        |
| Nitratiruptor     | 2              | 40             | 0        | 0        | 0        | 0       | 0       | 1       | 0        | 0        | 1       | 0        | 1       | 0        | 0       | 0       | 1        | 0       | 0       | 0       | 0       | 0        |
| Nitrobacter       | 2              | 99             | 0        | 0        | 0        | 0       | 1       | 0       | 0        | 0        | 1       | 0        | 1       | 1        | 0       | 1       | 1        | 1       | 1       | 0       | 1       | 1        |
| Nitrococcus       | 1              | 2              | 0        | 0        | 0        | 0       | 0       | 0       | 0        | 0        | 0       | 0        | 0       | 0        | 0       | 0       | 0        | 0       | 0       | 0       | 0       | 0        |
| Nitrosococcus     | 2              | 94             | 0        | 0        | 0        | 0       | 0       | 1       | 0        | 0        | 1       | 0        | 1       | 1        | 0       | 1       | 1        | 0       | 1       | 1       | 1       | 1        |
| Nitrosomonas      | 2              | 72             | 0        | 0        | 0        | 0       | 1       | 1       | 0        | 0        | 1       | 1        | 1       | 0        | 0       | 1       | 1        | 0       | 0       | 0       | 1       | 1        |
| Nitrosopumilaceae | 1              | 7              | 0        | 0        | 0        | 0       | 0       | 0       | 0        | 0        | 0       | 0        | 0       | 0        | 0       | 0       | 0        | 0       | 0       | 0       | 0       | 0        |
| Nitrosopumilus    | 1              | 11             | 0        | 0        | 0        | 0       | 0       | 0       | 0        | 0        | 0       | 0        | 0       | 0        | 0       | 0       | 0        | 0       | 0       | 0       | 0       | 0        |
| Nitrospira        | 2              | 74             | 0        | 0        | 0        | 0       | 0       | 1       | 0        | 0        | 1       | 1        | 1       | 0        | 0       | 1       | 1        | 0       | 0       | 1       | 1       | 1        |
| Nocardia          | 2              | 185            | 0        | 0        | 1        | 1       | 0       | 0       | 0        | 0        | 1       | 0        | 1       | 1        | 1       | 1       | 1        | 0       | 0       | 1       | 1       | 1        |
| Nocardioidaceae   | 1              | 2              | 0        | 0        | 0        | 0       | 0       | 0       | 0        | 0        | 0       | 0        | 0       | 0        | 0       | 0       | 0        | 0       | 0       | 0       | 0       | 0        |
| Nocardioides      | 2              | 157            | 0        | 1        | 1        | 1       | 0       | 0       | 0        | 0        | 1       | 0        | 1       | 1        | 0       | 1       | 1        | 0       | 1       | 1       | 1       | 1        |
| Nocardiopsis      | 2              | 102            | 0        | 0        | 0        | 0       | 0       | 0       | 0        | 0        | 1       | 0        | 1       | 1        | 0       | 1       | 1        | 0       | 1       | 1       | 1       | 1        |
| Nodularia         | 1              | 22             | 0        | 0        | 0        | 0       | 0       | 0       | 0        | 0        | 1       | 0        | 0       | 0        | 0       | 0       | 0        | 0       | 0       | 0       | 0       | 0        |
| Nonlabens         | 1              | 19             | 0        | 0        | 0        | 0       | 0       | 0       | 0        | 0        | 0       | 0        | 0       | 0        | 0       | 0       | 0        | 0       | 0       | 0       | 0       | 0        |
| Nostoc            | 2              | 111            | 0        | 0        | 0        | 1       | 0       | 1       | 0        | 0        | 1       | 0        | 1       | 0        | 0       | 0       | 1        | 1       | 0       | 0       | 1       | 1        |
| Nostocaceae       | 1              | 2              | 0        | 0        | 0        | 0       | 0       | 0       | 0        | 0        | 0       | 0        | 0       | 0        | 0       | 0       | 0        | 0       | 0       | 0       | 0       | 0        |
| Novosphingobium   | 2              | 169            | 1        | 0        | 1        | 0       | 0       | 0       | 0        | 0        | 1       | 0        | 1       | 1        | 0       | 1       | 1        | 0       | 1       | 0       | 1       | 1        |
| Oceanibaculum     | 1              | 3              | 0        | 0        | 0        | 0       | 0       | 0       | 0        | 0        | 0       | 0        | 0       | 0        | 0       | 0       | 0        | 0       | 0       | 0       | 0       | 0        |
| Oceanibulbus      | 1              | 12             | 0        | 0        | 0        | 0       | 0       | 0       | 0        | 0        | 0       | 0        | 0       | 0        | 0       | 1       | 0        | 0       | 0       | 0       | 0       | 0        |
| Oceanicola        | 1              | 9              | 0        | 0        | 0        | 0       | 1       | 0       | 0        | 0        | 0       | 0        | 1       | 0        | 0       | 0       | 0        | 0       | 0       | 0       | 0       | 0        |
| Oceanimonas       | 1              | 33             | 0        | 0        | 0        | 0       | 0       | 0       | 0        | 0        | 0       | 0        | 0       | 0        | 0       | 0       | 0        | 0       | 0       | 0       | 0       | 0        |
| Oceaniovalibus    | 1              | 2              | 0        | 0        | 0        | 0       | 0       | 0       | 0        | 0        | 0       | 0        | 0       | 0        | 0       | 0       | 0        | 0       | 0       | 0       | 0       | 0        |
| Oceanithermus     | 2              | 72             | 0        | 0        | 0        | 0       | 0       | 0       | 0        | 0        | 1       | 0        | 1       | 0        | 0       | 1       | 1        | 0       | 0       | 1       | 1       | 0        |
| Oceanobacillus    | 2              | 91             | 0        | 0        | 0        | 0       | 0       | 1       | 0        | 0        | 1       | 0        | 1       | 1        | 0       | 1       | 1        | 0       | 0       | 1       | 1       | 0        |
| Oceanospirillum   | 1              | 2              | 0        | 0        | 0        | 0       | 0       | 0       | 0        | 0        | 0       | 0        | 0       | 0        | 0       | 0       | 0        | 0       | 0       | 0       | 0       | 0        |
| Ochrobactrum      | 2              | 133            | 0        | 0        | 0        | 0       | 0       | 1       | 0        | 0        | 1       | 0        | 1       | 1        | 0       | 1       | 1        | 0       | 0       | 1       | 1       | 1        |
| Octadecabacter    | 1              | 29             | 0        | 0        | 0        | 0       | 0       | 0       | 0        | 0        | 0       | 0        | 0       | 0        | 0       | 0       | 0        | 0       | 0       | 0       | 0       | 0        |
| Oenococcus        | 2              | 41             | 0        | 0        | 0        | 0       | 0       | 0       | 0        | 0        | 1       | 0        | 1       | 0        | 0       | 1       | 1        | 0       | 0       | 1       | 0       | 0        |
| Oleomonas         | 1              | 2              | 0        | 0        | 0        | 0       | 0       | 0       | 0        | 0        | 0       | 0        | 0       | 0        | 0       | 0       | 0        | 0       | 0       | 0       | 0       | 0        |
| Oligotropha       | 3              | 87             | 0        | 0        | 0        | 0       | 0       | 1       | 0        | 0        | 1       | 0        | 1       | 1        | 0       | 1       | 1        | 0       | 0       | 0       | 1       | 1        |
| Olsenella         | 2              | 40             | 0        | 0        | 0        | 0       | 0       | 0       | 0        | 0        | 1       | 0        | 1       | 0        | 0       | 0       | 1        | 1       | 0       | 1       | 0       | 0        |
| Opitutus          | 2              | 67             | 0        | 0        | 0        | 0       | 0       | 1       | 0        | 0        | 1       | 0        | 1       | 0        | 0       | 0       | 1        | 1       | 0       | 1       | 1       | 1        |
| Orientia          | 1              | 21             | 0        | 0        | 0        | 0       | 0       | 0       | 0        | 0        | 1       | 0        | 0       | 0        | 0       | 0       | 0        | 0       | 0       | 0       | 1       | 0        |
| Ornithobacterium  | 1              | 11             | 0        | 0        | 0        | 0       | 0       | 0       | 0        | 0        | 0       | 0        | 0       | 0        | 0       | 0       | 0        | 0       | 0       | 0       | 0       | 0        |
| Oscillatoria      | 1              | 16             | 0        | 0        | 0        | 0       | 0       | 0       | 0        | 0        | 0       | 0        | 0       | 0        | 0       | 0       | 0        | 0       | 0       | 0       | 0       | 0        |
| Oscillatoriales   | 1              | 2              | 0        | 0        | 0        | 0       | 0       | 0       | 0        | 0        | 0       | 0        | 0       | 0        | 0       | 0       | 0        | 0       | 0       | 0       | 0       | 0        |
| Oscillibacter     | 1              | 20             | 0        | 0        | 0        | 0       | 0       | 0       | 0        | 0        | 1       | 0        | 0       | 0        | 0       | 0       | 0        | 0       | 0       | 0       | 0       | 0        |
| Owenweeksia       | 1              | 15             | 0        | 0        | 0        | 0       | 0       | 0       | 0        | 0        | 0       | 0        | 0       | 0        | 0       | 0       | 0        | 0       | 0       | 0       | 0       | 0        |
| Oxalobacteraceae  | 1              | 4              | 0        | 0        | 0        | 0       | 0       | 0       | 0        | 0        | 1       | 0        | 0       | 0        | 0       | 0       | 0        | 0       | 0       | 0       | 0       | 0        |
| Paenibacillus     | 2              | 152            | 0        | 0        | 0        | 0       | 0       | 0       | 0        | 0        | 1       | 0        | 1       | 1        | 0       | 1       | 1        | 1       | 0       | 1       | 1       | 1        |
| Paludibacter      | 2              | 67             | 0        | 0        | 0        | 0       | 0       | 0       | 0        | 0        | 1       | 0        | 1       | 0        | 0       | 0       | 1        | 0       | 0       | 1       | 1       | 1        |
| Pandoraea         | 1              | 18             | 0        | 0        | 0        | 0       | 0       | 0       | 0        | 0        | 0       | 0        | 0       | 0        | 0       | 0       | 0        | 0       | 0       | 0       | 0       | 0        |
| Pannonibacter     | 1              | 3              | 0        | 0        | 0        | 0       | 0       | 0       | 0        | 0        | 0       | 0        | 0       | 0        | 0       | 0       | 0        | 0       | 0       | 0       | 0       | 0        |

| Genus              | Cluster Number | Protein Counts | 1.3.1.32 | 1.3.1.56 | 1.3.99.- | 1.4.3.4 | 1.6.5.- | 1.7.1.- | 1.8.99.3 | 1.97.1.8 | 2.1.1.- | 2.1.1.67 | 2.3.1.- | 2.3.1.16 | 2.3.1.5 | 2.3.1.9 | 2.4.2.10 | 2.4.2.3 | 2.4.2.4 | 2.4.2.8 | 2.5.1.- | 2.5.1.18 |
|--------------------|----------------|----------------|----------|----------|----------|---------|---------|---------|----------|----------|---------|----------|---------|----------|---------|---------|----------|---------|---------|---------|---------|----------|
| Pantholops         | 1              | 23             | 0        | 0        | 0        | 0       | 0       | 0       | 0        | 0        | 1       | 0        | 0       | 1        | 0       | 1       | 0        | 0       | 0       | 0       | 1       | 1        |
| Pantoea            | 2              | 181            | 0        | 0        | 0        | 0       | 1       | 0       | 0        | 0        | 1       | 0        | 1       | 1        | 0       | 1       | 1        | 1       | 1       | 1       | 1       | 1        |
| Parabacteroides    | 2              | 64             | 0        | 0        | 0        | 0       | 1       | 0       | 0        | 0        | 1       | 0        | 1       | 0        | 0       | 0       | 1        | 0       | 0       | 1       | 1       | 0        |
| Parachlamydia      | 1              | 11             | 0        | 0        | 0        | 0       | 0       | 0       | 0        | 0        | 0       | 0        | 0       | 0        | 0       | 0       | 0        | 0       | 0       | 0       | 0       | 0        |
| Paracoccus         | 2              | 169            | 0        | 0        | 0        | 0       | 1       | 1       | 0        | 0        | 1       | 0        | 1       | 1        | 0       | 1       | 1        | 0       | 1       | 0       | 1       | 1        |
| Parvibaculum       | 3              | 117            | 0        | 0        | 0        | 0       | 0       | 1       | 0        | 0        | 1       | 0        | 1       | 1        | 0       | 1       | 1        | 0       | 1       | 1       | 1       | 1        |
| Parvularcula       | 2              | 72             | 0        | 0        | 0        | 0       | 0       | 0       | 0        | 0        | 1       | 0        | 1       | 0        | 0       | 1       | 1        | 0       | 0       | 1       | 1       | 1        |
| Pasteurella        | 2              | 85             | 0        | 0        | 0        | 0       | 1       | 1       | 0        | 0        | 1       | 0        | 1       | 0        | 0       | 0       | 1        | 1       | 0       | 1       | 0       | 1        |
| Pasteurellaceae    | 1              | 2              | 0        | 0        | 0        | 0       | 1       | 0       | 0        | 0        | 0       | 0        | 0       | 0        | 0       | 0       | 0        | 0       | 0       | 0       | 0       | 0        |
| Pectobacterium     | 1              | 44             | 0        | 0        | 0        | 0       | 0       | 0       | 0        | 0        | 1       | 0        | 0       | 0        | 0       | 0       | 1        | 0       | 0       | 0       | 1       | 0        |
| Pediococcus        | 1              | 43             | 0        | 0        | 0        | 0       | 0       | 0       | 0        | 0        | 1       | 0        | 1       | 0        | 0       | 0       | 0        | 0       | 0       | 1       | 0       | 0        |
| Pedobacter         | 2              | 88             | 0        | 0        | 0        | 0       | 0       | 0       | 0        | 0        | 1       | 0        | 1       | 0        | 0       | 1       | 1        | 0       | 0       | 1       | 1       | 1        |
| Pelagibaca         | 1              | 10             | 0        | 0        | 0        | 0       | 1       | 0       | 0        | 0        | 0       | 0        | 1       | 0        | 0       | 1       | 0        | 0       | 0       | 0       | 0       | 0        |
| Pelagibacterium    | 1              | 39             | 0        | 0        | 0        | 0       | 0       | 0       | 0        | 0        | 0       | 0        | 0       | 0        | 0       | 0       | 0        | 0       | 0       | 0       | 0       | 0        |
| Pelobacter         | 2              | 85             | 0        | 0        | 0        | 0       | 0       | 0       | 0        | 0        | 1       | 0        | 1       | 0        | 0       | 0       | 1        | 1       | 0       | 1       | 1       | 0        |
| Pelodictyon        | 2              | 62             | 0        | 0        | 0        | 0       | 0       | 1       | 0        | 0        | 1       | 0        | 1       | 0        | 0       | 0       | 1        | 0       | 0       | 1       | 1       | 0        |
| Pelosinus          | 1              | 1              | 0        | 0        | 0        | 0       | 0       | 0       | 0        | 0        | 0       | 0        | 0       | 0        | 0       | 0       | 0        | 0       | 0       | 0       | 0       | 0        |
| Pelotomaculum      | 2              | 60             | 0        | 0        | 0        | 0       | 0       | 0       | 0        | 0        | 1       | 0        | 1       | 1        | 0       | 0       | 1        | 0       | 0       | 1       | 0       | 0        |
| Peptostreptococcus | 1              | 1              | 0        | 0        | 0        | 0       | 0       | 0       | 0        | 0        | 0       | 0        | 0       | 0        | 0       | 0       | 0        | 0       | 0       | 0       | 0       | 0        |
| Persephonella      | 2              | 55             | 0        | 0        | 0        | 0       | 0       | 0       | 0        | 0        | 1       | 0        | 1       | 0        | 0       | 0       | 1        | 0       | 0       | 1       | 1       | 0        |
| Petrogga           | 2              | 72             | 0        | 0        | 0        | 0       | 1       | 0       | 0        | 0        | 1       | 0        | 1       | 0        | 0       | 1       | 1        | 0       | 0       | 1       | 0       | 0        |
| Phaeobacter        | 2              | 55             | 0        | 0        | 0        | 0       | 1       | 0       | 0        | 0        | 1       | 0        | 0       | 0        | 0       | 1       | 1        | 0       | 0       | 0       | 0       | 0        |
| Phenylobacterium   | 3              | 103            | 0        | 0        | 0        | 0       | 0       | 0       | 0        | 0        | 1       | 0        | 1       | 1        | 1       | 1       | 1        | 0       | 1       | 1       | 1       | 1        |
| Photobacterium     | 2              | 119            | 0        | 0        | 0        | 0       | 1       | 1       | 0        | 0        | 1       | 1        | 1       | 1        | 0       | 1       | 1        | 1       | 1       | 1       | 1       | 1        |
| Photorhabdus       | 2              | 149            | 0        | 0        | 0        | 0       | 1       | 1       | 0        | 0        | 1       | 0        | 1       | 1        | 0       | 1       | 1        | 1       | 1       | 1       | 1       | 1        |
| Phycisphaera       | 1              | 9              | 0        | 0        | 0        | 0       | 0       | 0       | 0        | 0        | 0       | 0        | 0       | 0        | 0       | 0       | 0        | 0       | 0       | 0       | 0       | 0        |
| Phyllobacterium    | 1              | 6              | 0        | 0        | 0        | 0       | 0       | 0       | 0        | 0        | 0       | 0        | 0       | 1        | 0       | 0       | 0        | 0       | 0       | 0       | 0       | 0        |
| Picrophilus        | 1              | 15             | 0        | 0        | 0        | 0       | 0       | 0       | 0        | 0        | 0       | 0        | 0       | 0        | 0       | 0       | 0        | 0       | 0       | 0       | 0       | 0        |
| Pirellula          | 2              | 85             | 0        | 0        | 0        | 0       | 0       | 0       | 0        | 0        | 1       | 0        | 1       | 1        | 0       | 0       | 1        | 0       | 1       | 1       | 1       | 0        |
| Planctomyces       | 2              | 93             | 0        | 0        | 0        | 0       | 1       | 1       | 0        | 0        | 1       | 0        | 1       | 0        | 0       | 1       | 1        | 0       | 0       | 1       | 1       | 1        |
| Plautia            | 1              | 17             | 0        | 0        | 0        | 0       | 0       | 0       | 0        | 0        | 1       | 0        | 0       | 0        | 0       | 0       | 0        | 0       | 0       | 0       | 1       | 0        |
| Plesiomonas        | 1              | 4              | 0        | 0        | 0        | 0       | 0       | 0       | 0        | 0        | 0       | 0        | 0       | 0        | 0       | 0       | 0        | 0       | 0       | 0       | 0       | 0        |
| Pleurocapsa        | 1              | 23             | 0        | 0        | 0        | 0       | 0       | 0       | 0        | 0        | 0       | 0        | 0       | 0        | 0       | 0       | 0        | 0       | 0       | 0       | 0       | 0        |
| Polaribacter       | 2              | 74             | 0        | 0        | 0        | 0       | 1       | 0       | 0        | 0        | 1       | 0        | 1       | 0        | 0       | 1       | 1        | 0       | 0       | 0       | 1       | 0        |
| Polaromonas        | 3              | 238            | 0        | 1        | 0        | 0       | 0       | 1       | 0        | 0        | 1       | 0        | 1       | 1        | 0       | 1       | 1        | 0       | 1       | 0       | 1       | 1        |
| Polymorphum        | 3              | 173            | 0        | 0        | 0        | 0       | 0       | 0       | 0        | 0        | 1       | 0        | 1       | 1        | 0       | 1       | 1        | 0       | 1       | 1       | 1       | 1        |
| Polynucleobacter   | 1              | 19             | 0        | 0        | 0        | 0       | 0       | 0       | 0        | 0        | 0       | 0        | 0       | 0        | 0       | 0       | 0        | 0       | 0       | 0       | 0       | 0        |
| Ponticaulis        | 1              | 1              | 0        | 0        | 0        | 0       | 0       | 0       | 0        | 0        | 0       | 0        | 0       | 0        | 0       | 0       | 0        | 0       | 0       | 0       | 0       | 0        |
| Porphyromonas      | 2              | 63             | 0        | 0        | 0        | 0       | 1       | 1       | 0        | 0        | 1       | 0        | 1       | 0        | 0       | 0       | 1        | 0       | 0       | 1       | 1       | 0        |
| Prevotella         | 1              | 65             | 0        | 0        | 0        | 0       | 1       | 0       | 0        | 0        | 1       | 0        | 1       | 0        | 0       | 0       | 1        | 0       | 0       | 1       | 1       | 0        |
| Prochlorococcus    | 2              | 68             | 0        | 0        | 0        | 0       | 0       | 1       | 0        | 0        | 1       | 0        | 1       | 0        | 0       | 0       | 1        | 0       | 0       | 0       | 1       | 1        |
| Propionibacterium  | 1              | 62             | 0        | 0        | 0        | 0       | 0       | 0       | 0        | 0        | 1       | 0        | 1       | 0        | 0       | 0       | 1        | 0       | 1       | 1       | 1       | 0        |
| Prosthecochloris   | 1              | 16             | 0        | 0        | 0        | 0       | 0       | 0       | 0        | 0        | 0       | 0        | 0       | 0        | 0       | 0       | 0        | 0       | 0       | 0       | 0       | 0        |
| Proteobacteria     | 1              | 19             | 0        | 0        | 0        | 0       | 0       | 0       | 0        | 0        | 0       | 0        | 1       | 0        | 0       | 0       | 0        | 0       | 1       | 0       | 0       | 1        |
| Proteus            | 2              | 113            | 0        | 0        | 1        | 0       | 1       | 1       | 0        | 0        | 1       | 0        | 1       | 1        | 0       | 1       | 1        | 1       | 1       | 1       | 1       | 1        |
| Providencia        | 1              | 38             | 0        | 0        | 1        | 0       | 1       | 0       | 0        | 0        | 1       | 0        | 0       | 0        | 0       | 0       | 0        | 0       | 0       | 0       | 0       | 0        |
| Pseudaminobacter   | 1              | 10             | 0        | 0        | 0        | 0       | 0       | 0       | 0        | 0        | 0       | 0        | 0       | 1        | 0       | 0       | 0        | 0       | 0       | 1       | 0       | 0        |
| Pseudanabaena      | 1              | 11             | 0        | 0        | 0        | 0       | 0       | 0       | 0        | 0        | 0       | 0        | 0       | 0        | 0       | 0       | 0        | 0       | 0       | 0       | 0       | 0        |
| Pseudoalteromonas  | 2              | 188            | 0        | 0        | 0        | 0       | 1       | 1       | 0        | 0        | 1       | 1        | 1       | 1        | 0       | 1       | 1        | 1       | 0       | 1       | 1       | 1        |
| Pseudochrobactrum  | 1              | 7              | 0        | 0        | 0        | 0       | 0       | 0       | 0        | 0        | 0       | 0        | 0       | 1        | 0       | 0       | 0        | 0       | 0       | 0       | 0       | 0        |
| Pseudogulbenkiania | 1              | 40             | 0        | 0        | 0        | 0       | 0       | 0       | 0        | 0        | 1       | 0        | 0       | 0        | 0       | 0       | 0        | 0       | 0       | 0       | 0       | 0        |
| pseudomallei       | 3              | 131            | 0        | 0        | 0        | 0       | 0       | 1       | 0        | 0        | 1       | 0        | 1       | 1        | 0       | 1       | 1        | 0       | 1       | 1       | 1       | 1        |

| Genus                   | Cluster Number | Protein Counts | 1.3.1.32 | 1.3.1.56 | 1.3.99.- | 1.4.3.4 | 1.6.5.- | 1.7.1.- | 1.8.99.3 | 1.97.1.8 | 2.1.1.- | 2.1.1.67 | 2.3.1.- | 2.3.1.16 | 2.3.1.5 | 2.3.1.9 | 2.4.2.10 | 2.4.2.3 | 2.4.2.4 | 2.4.2.8 | 2.5.1.- | 2.5.1.18 |
|-------------------------|----------------|----------------|----------|----------|----------|---------|---------|---------|----------|----------|---------|----------|---------|----------|---------|---------|----------|---------|---------|---------|---------|----------|
| Pseudomonas             | 3              | 381            | 0        | 1        | 0        | 1       | 1       | 1       | 0        | 0        | 1       | 1        | 1       | 1        | 1       | 1       | 1        | 0       | 1       | 1       | 1       | 1        |
| Pseudonocardia          | 3              | 180            | 0        | 0        | 1        | 0       | 0       | 0       | 0        | 0        | 1       | 0        | 1       | 1        | 0       | 1       | 1        | 1       | 0       | 1       | 1       | 1        |
| Pseudorhodobacter       | 1              | 4              | 0        | 0        | 0        | 0       | 0       | 0       | 0        | 0        | 0       | 0        | 0       | 0        | 0       | 0       | 0        | 0       | 0       | 0       | 0       | 0        |
| Pseudovibrio            | 1              | 33             | 0        | 0        | 0        | 0       | 0       | 0       | 0        | 0        | 0       | 0        | 0       | 0        | 0       | 0       | 0        | 0       | 0       | 0       | 0       | 0        |
| Pseudoxanthomonas       | 2              | 124            | 0        | 0        | 0        | 0       | 0       | 0       | 0        | 0        | 1       | 1        | 1       | 0        | 0       | 1       | 1        | 0       | 1       | 1       | 1       | 1        |
| Psychrobacter           | 2              | 124            | 0        | 0        | 0        | 0       | 1       | 1       | 0        | 0        | 1       | 1        | 1       | 1        | 0       | 1       | 1        | 0       | 0       | 1       | 0       | 1        |
| Psychroflexus           | 1              | 22             | 0        | 0        | 0        | 0       | 1       | 0       | 0        | 0        | 0       | 0        | 0       | 0        | 0       | 0       | 0        | 0       | 0       | 0       | 0       | 0        |
| Psychromonas            | 2              | 110            | 0        | 0        | 0        | 0       | 1       | 1       | 0        | 0        | 1       | 0        | 1       | 0        | 0       | 1       | 1        | 1       | 1       | 1       | 1       | 1        |
| Pusillimonas            | 3              | 111            | 0        | 0        | 1        | 0       | 0       | 0       | 0        | 0        | 1       | 0        | 1       | 1        | 0       | 1       | 1        | 0       | 0       | 0       | 0       | 1        |
| Pyrobaculum             | 1              | 15             | 0        | 0        | 0        | 0       | 0       | 0       | 0        | 0        | 0       | 0        | 0       | 0        | 0       | 0       | 0        | 0       | 0       | 0       | 0       | 0        |
| Pyrococcus              | 1              | 10             | 0        | 0        | 0        | 0       | 0       | 0       | 0        | 0        | 0       | 0        | 0       | 0        | 0       | 0       | 0        | 0       | 0       | 0       | 0       | 0        |
| Pyrolobus               | 1              | 4              | 0        | 0        | 0        | 0       | 0       | 0       | 0        | 0        | 0       | 0        | 0       | 0        | 0       | 0       | 0        | 0       | 0       | 0       | 0       | 0        |
| Rahnella                | 2              | 143            | 0        | 0        | 0        | 0       | 0       | 0       | 0        | 0        | 1       | 0        | 1       | 0        | 0       | 1       | 1        | 1       | 0       | 1       | 1       | 1        |
| Ralstonia               | 3              | 332            | 0        | 0        | 1        | 1       | 0       | 1       | 0        | 0        | 1       | 0        | 1       | 1        | 1       | 1       | 1        | 0       | 1       | 1       | 1       | 1        |
| Ramlibacter             | 1              | 35             | 0        | 0        | 0        | 0       | 0       | 0       | 0        | 0        | 0       | 0        | 0       | 0        | 0       | 0       | 0        | 0       | 0       | 0       | 0       | 0        |
| Raoultella              | 2              | 139            | 0        | 0        | 0        | 0       | 1       | 1       | 0        | 0        | 1       | 0        | 1       | 1        | 0       | 1       | 1        | 1       | 1       | 1       | 1       | 1        |
| Raphidiopsis            | 1              | 5              | 0        | 0        | 0        | 0       | 0       | 0       | 0        | 0        | 0       | 0        | 0       | 0        | 0       | 0       | 0        | 0       | 0       | 0       | 0       | 0        |
| Reinekea                | 1              | 2              | 0        | 0        | 0        | 0       | 0       | 0       | 0        | 0        | 0       | 0        | 0       | 0        | 0       | 0       | 0        | 0       | 0       | 0       | 0       | 0        |
| Renibacterium           | 2              | 67             | 0        | 0        | 0        | 0       | 0       | 0       | 0        | 0        | 1       | 0        | 1       | 1        | 0       | 1       | 1        | 0       | 1       | 1       | 1       | 1        |
| Rhizobiaceae            | 1              | 3              | 0        | 0        | 0        | 0       | 0       | 0       | 0        | 0        | 0       | 0        | 0       | 0        | 0       | 0       | 0        | 0       | 0       | 0       | 0       | 0        |
| Rhizobiales             | 1              | 6              | 0        | 0        | 0        | 0       | 0       | 0       | 0        | 0        | 0       | 0        | 0       | 1        | 0       | 0       | 0        | 0       | 0       | 0       | 0       | 0        |
| Rhizobium               | 3              | 257            | 1        | 0        | 0        | 0       | 0       | 1       | 0        | 0        | 1       | 0        | 1       | 1        | 0       | 1       | 1        | 0       | 1       | 1       | 1       | 1        |
| Rhizobium/Agrobacterium | 2              | 87             | 0        | 0        | 0        | 0       | 0       | 0       | 0        | 0        | 1       | 0        | 1       | 0        | 0       | 1       | 1        | 0       | 0       | 1       | 1       | 1        |
| Rhodanobacter           | 1              | 21             | 0        | 0        | 0        | 0       | 0       | 0       | 0        | 0        | 0       | 0        | 0       | 0        | 0       | 0       | 0        | 0       | 0       | 0       | 0       | 0        |
| Rhodobacter             | 3              | 175            | 0        | 0        | 0        | 0       | 0       | 0       | 0        | 0        | 1       | 0        | 1       | 1        | 0       | 1       | 1        | 0       | 1       | 1       | 1       | 1        |
| Rhodobacteraceae        | 1              | 21             | 0        | 0        | 0        | 0       | 1       | 0       | 0        | 0        | 1       | 0        | 1       | 0        | 0       | 1       | 0        | 0       | 0       | 0       | 0       | 0        |
| Rhodobacterales         | 1              | 34             | 0        | 0        | 0        | 0       | 1       | 0       | 0        | 0        | 1       | 0        | 1       | 0        | 0       | 1       | 1        | 0       | 0       | 0       | 0       | 0        |
| Rhodococcus             | 2              | 292            | 0        | 1        | 1        | 1       | 0       | 0       | 0        | 0        | 1       | 0        | 1       | 1        | 1       | 1       | 1        | 0       | 1       | 1       | 1       | 1        |
| Rhodocyclaceae          | 1              | 7              | 0        | 0        | 0        | 0       | 0       | 0       | 0        | 0        | 0       | 0        | 0       | 0        | 0       | 0       | 0        | 0       | 0       | 0       | 0       | 0        |
| Rhodoferax              | 3              | 144            | 0        | 0        | 0        | 0       | 0       | 1       | 0        | 0        | 1       | 0        | 1       | 1        | 0       | 1       | 1        | 0       | 1       | 0       | 1       | 1        |
| Rhodomicrobium          | 2              | 103            | 0        | 0        | 0        | 0       | 0       | 0       | 1        | 0        | 1       | 0        | 1       | 0        | 0       | 1       | 1        | 0       | 0       | 0       | 1       | 1        |
| Rhodopirellula          | 2              | 87             | 0        | 0        | 0        | 0       | 1       | 1       | 0        | 0        | 1       | 0        | 1       | 0        | 0       | 0       | 1        | 0       | 1       | 1       | 1       | 0        |
| Rhodopseudomonas        | 3              | 246            | 0        | 0        | 0        | 0       | 0       | 1       | 0        | 0        | 1       | 0        | 1       | 1        | 0       | 1       | 1        | 0       | 1       | 0       | 1       | 1        |
| Rhodospirillum          | 2              | 121            | 0        | 0        | 0        | 0       | 0       | 0       | 0        | 0        | 1       | 0        | 1       | 1        | 0       | 1       | 1        | 0       | 1       | 0       | 1       | 1        |
| Rhodothermus            | 2              | 76             | 0        | 0        | 1        | 0       | 0       | 0       | 0        | 0        | 1       | 0        | 1       | 1        | 0       | 1       | 1        | 0       | 0       | 1       | 1       | 0        |
| Rhodovulum              | 1              | 4              | 0        | 0        | 0        | 0       | 0       | 0       | 0        | 0        | 0       | 0        | 0       | 0        | 0       | 0       | 0        | 0       | 0       | 0       | 0       | 0        |
| Richelia                | 1              | 2              | 0        | 0        | 0        | 0       | 0       | 0       | 0        | 0        | 0       | 0        | 0       | 0        | 0       | 0       | 0        | 0       | 0       | 0       | 0       | 0        |
| Rickettsia              | 2              | 43             | 0        | 0        | 0        | 0       | 0       | 1       | 0        | 0        | 1       | 0        | 1       | 1        | 0       | 1       | 0        | 0       | 0       | 0       | 1       | 0        |
| Rickettsiaceae          | 1              | 5              | 0        | 0        | 0        | 0       | 0       | 0       | 0        | 0        | 1       | 0        | 0       | 0        | 0       | 0       | 0        | 0       | 0       | 0       | 1       | 0        |
| Riemerella              | 2              | 61             | 0        | 0        | 0        | 0       | 0       | 0       | 0        | 0        | 1       | 0        | 1       | 0        | 0       | 1       | 0        | 0       | 0       | 1       | 0       | 0        |
| Rivularia               | 1              | 18             | 0        | 0        | 0        | 0       | 0       | 0       | 0        | 0        | 0       | 0        | 0       | 0        | 0       | 0       | 0        | 0       | 0       | 0       | 0       | 0        |
| Robiginitalea           | 2              | 83             | 0        | 0        | 0        | 0       | 1       | 0       | 0        | 0        | 1       | 0        | 1       | 1        | 0       | 0       | 1        | 0       | 1       | 0       | 1       | 0        |
| Roseburia               | 2              | 58             | 0        | 0        | 0        | 0       | 0       | 0       | 0        | 0        | 1       | 0        | 1       | 0        | 0       | 1       | 1        | 1       | 0       | 0       | 1       | 0        |
| Roseibium               | 1              | 3              | 0        | 0        | 0        | 0       | 1       | 0       | 0        | 0        | 0       | 0        | 0       | 0        | 0       | 0       | 0        | 0       | 0       | 0       | 0       | 0        |
| Roseiflexus             | 3              | 100            | 0        | 0        | 1        | 0       | 0       | 0       | 0        | 0        | 1       | 0        | 1       | 1        | 0       | 1       | 1        | 1       | 0       | 0       | 1       | 0        |
| Roseobacter             | 2              | 149            | 0        | 0        | 0        | 0       | 1       | 0       | 0        | 0        | 1       | 0        | 1       | 0        | 0       | 1       | 1        | 0       | 1       | 1       | 1       | 1        |
| Roseomonas              | 1              | 2              | 0        | 0        | 0        | 0       | 0       | 0       | 0        | 0        | 0       | 0        | 0       | 0        | 0       | 0       | 0        | 0       | 0       | 0       | 0       | 0        |
| Roseovarius             | 1              | 15             | 0        | 0        | 0        | 0       | 1       | 0       | 0        | 0        | 0       | 0        | 1       | 0        | 0       | 1       | 0        | 0       | 0       | 0       | 0       | 0        |
| Rothia                  | 1              | 44             | 0        | 0        | 0        | 0       | 0       | 0       | 0        | 0        | 1       | 0        | 1       | 0        | 0       | 0       | 1        | 0       | 0       | 1       | 1       | 0        |
| Rubrivivax              | 1              | 24             | 0        | 0        | 0        | 0       | 0       | 0       | 0        | 0        | 0       | 0        | 0       | 0        | 0       | 0       | 0        | 0       | 0       | 0       | 0       | 0        |
| Rubroacter              | 3              | 117            | 1        | 0        | 0        | 0       | 0       | 0       | 0        | 0        | 1       | 0        | 1       | 1        | 0       | 1       | 1        | 0       | 0       | 1       | 1       | 1        |
| Ruegeria                | 2              | 189            | 0        | 0        | 1        | 0       | 1       | 1       | 0        | 0        | 1       | 0        | 1       | 1        | 0       | 1       | 1        | 0       | 1       | 1       | 1       | 1        |



| Genus             | Cluster Number | Protein Counts | 1.3.1.32 | 1.3.1.56 | 1.3.99.- | 1.4.3.4 | 1.6.5.- | 1.7.1.- | 1.8.99.3 | 1.97.1.8 | 2.1.1.- | 2.1.1.67 | 2.3.1.- | 2.3.1.16 | 2.3.1.5 | 2.3.1.9 | 2.4.2.10 | 2.4.2.3 | 2.4.2.4 | 2.4.2.8 | 2.5.1.- | 2.5.1.18 |
|-------------------|----------------|----------------|----------|----------|----------|---------|---------|---------|----------|----------|---------|----------|---------|----------|---------|---------|----------|---------|---------|---------|---------|----------|
| Ruminococcaceae   | 1              | 2              | 0        | 0        | 0        | 0       | 0       | 0       | 0        | 0        | 1       | 0        | 0       | 0        | 0       | 0       | 0        | 0       | 0       | 0       | 0       | 0        |
| Ruminococcus      | 2              | 101            | 0        | 0        | 0        | 0       | 0       | 0       | 0        | 0        | 1       | 0        | 1       | 1        | 0       | 1       | 1        | 1       | 0       | 1       | 1       | 1        |
| Runella           | 1              | 26             | 0        | 0        | 0        | 0       | 0       | 0       | 0        | 0        | 0       | 0        | 0       | 0        | 0       | 0       | 0        | 0       | 0       | 0       | 0       | 0        |
| Saccharomonospora | 2              | 132            | 0        | 0        | 0        | 0       | 0       | 0       | 0        | 0        | 1       | 0        | 1       | 1        | 0       | 1       | 1        | 0       | 1       | 1       | 1       | 0        |
| Saccharophagus    | 2              | 81             | 0        | 0        | 0        | 0       | 1       | 1       | 0        | 0        | 1       | 0        | 1       | 1        | 0       | 1       | 1        | 0       | 1       | 1       | 1       | 1        |
| Saccharopolyspora | 3              | 194            | 0        | 0        | 0        | 1       | 0       | 0       | 0        | 0        | 1       | 0        | 1       | 1        | 1       | 1       | 1        | 0       | 1       | 1       | 1       | 1        |
| Saccharothrix     | 1              | 32             | 0        | 0        | 0        | 0       | 0       | 0       | 0        | 0        | 0       | 0        | 0       | 0        | 0       | 0       | 0        | 0       | 0       | 0       | 0       | 0        |
| Sagittula         | 1              | 10             | 0        | 0        | 0        | 0       | 0       | 0       | 0        | 0        | 0       | 0        | 0       | 0        | 0       | 1       | 0        | 0       | 0       | 0       | 0       | 0        |
| Salinibacter      | 2              | 77             | 0        | 0        | 0        | 1       | 0       | 0       | 0        | 0        | 1       | 0        | 1       | 1        | 0       | 1       | 1        | 0       | 0       | 1       | 1       | 0        |
| Salinimonas       | 1              | 1              | 0        | 0        | 0        | 0       | 0       | 0       | 0        | 0        | 0       | 0        | 0       | 0        | 0       | 0       | 0        | 0       | 0       | 0       | 0       | 0        |
| Salinispora       | 3              | 127            | 0        | 0        | 1        | 0       | 0       | 0       | 0        | 0        | 1       | 0        | 1       | 1        | 0       | 1       | 1        | 0       | 1       | 1       | 1       | 1        |
| Salinivibrio      | 1              | 2              | 0        | 0        | 0        | 0       | 1       | 0       | 0        | 0        | 0       | 0        | 0       | 0        | 0       | 0       | 0        | 0       | 0       | 0       | 0       | 0        |
| Salmonella        | 2              | 151            | 0        | 0        | 1        | 0       | 1       | 1       | 0        | 0        | 1       | 0        | 1       | 1        | 0       | 1       | 1        | 1       | 1       | 1       | 1       | 1        |
| Sanguibacter      | 2              | 73             | 0        | 0        | 0        | 0       | 0       | 0       | 0        | 0        | 1       | 0        | 1       | 1        | 0       | 0       | 1        | 0       | 1       | 1       | 1       | 1        |
| Saprospira        | 1              | 13             | 0        | 0        | 0        | 0       | 0       | 0       | 0        | 0        | 0       | 0        | 0       | 0        | 0       | 0       | 0        | 0       | 0       | 0       | 0       | 0        |
| Scardovia         | 1              | 1              | 0        | 0        | 0        | 0       | 0       | 0       | 0        | 0        | 0       | 0        | 0       | 0        | 0       | 0       | 0        | 0       | 0       | 0       | 0       | 0        |
| Scytonema         | 1              | 10             | 0        | 0        | 0        | 0       | 0       | 0       | 0        | 0        | 0       | 0        | 0       | 0        | 0       | 0       | 0        | 0       | 0       | 0       | 0       | 0        |
| Sebaldella        | 2              | 69             | 0        | 0        | 0        | 0       | 0       | 0       | 0        | 0        | 1       | 0        | 1       | 0        | 0       | 0       | 1        | 1       | 0       | 1       | 0       | 0        |
| Segniliparus      | 2              | 85             | 0        | 0        | 0        | 0       | 0       | 0       | 0        | 0        | 1       | 0        | 1       | 1        | 0       | 1       | 1        | 0       | 1       | 1       | 1       | 0        |
| Selenomonas       | 2              | 57             | 0        | 0        | 0        | 0       | 0       | 0       | 0        | 0        | 1       | 0        | 1       | 0        | 0       | 0       | 1        | 0       | 0       | 1       | 1       | 0        |
| Serinicoccus      | 1              | 1              | 0        | 0        | 0        | 0       | 0       | 0       | 0        | 0        | 0       | 0        | 0       | 0        | 0       | 0       | 0        | 0       | 0       | 0       | 0       | 0        |
| Serratia          | 2              | 186            | 0        | 0        | 1        | 0       | 1       | 1       | 0        | 0        | 1       | 0        | 1       | 1        | 1       | 1       | 1        | 1       | 1       | 1       | 1       | 1        |
| Shewanella        | 3              | 214            | 0        | 0        | 1        | 0       | 1       | 1       | 0        | 1        | 1       | 1        | 1       | 1        | 0       | 1       | 1        | 1       | 1       | 1       | 1       | 1        |
| Shigella          | 2              | 172            | 0        | 0        | 1        | 0       | 0       | 1       | 0        | 0        | 1       | 0        | 1       | 1        | 0       | 1       | 1        | 1       | 1       | 1       | 1       | 1        |
| Shinella          | 1              | 2              | 0        | 0        | 0        | 0       | 0       | 0       | 0        | 0        | 0       | 0        | 0       | 0        | 0       | 0       | 0        | 0       | 0       | 0       | 0       | 0        |
| Sideroxydans      | 2              | 81             | 0        | 0        | 0        | 0       | 0       | 0       | 1        | 0        | 1       | 1        | 1       | 1        | 0       | 0       | 1        | 0       | 0       | 1       | 1       | 1        |
| Silicibacter      | 2              | 105            | 0        | 0        | 1        | 0       | 1       | 0       | 0        | 0        | 1       | 0        | 1       | 1        | 0       | 1       | 1        | 0       | 0       | 1       | 1       | 1        |
| Simiduia          | 1              | 18             | 0        | 0        | 0        | 0       | 0       | 0       | 0        | 0        | 0       | 0        | 0       | 0        | 0       | 0       | 0        | 0       | 0       | 0       | 0       | 0        |
| Simkania          | 1              | 6              | 0        | 0        | 0        | 0       | 0       | 0       | 0        | 0        | 0       | 0        | 0       | 0        | 0       | 0       | 0        | 0       | 0       | 0       | 0       | 0        |
| Simonsiella       | 1              | 2              | 0        | 0        | 0        | 0       | 0       | 0       | 0        | 0        | 0       | 0        | 0       | 0        | 0       | 0       | 0        | 0       | 0       | 0       | 0       | 0        |
| Singulisphaera    | 1              | 18             | 0        | 0        | 0        | 0       | 0       | 0       | 0        | 0        | 0       | 0        | 0       | 0        | 0       | 0       | 0        | 0       | 0       | 0       | 0       | 0        |
| Sinorhizobium     | 3              | 207            | 0        | 0        | 0        | 0       | 0       | 1       | 0        | 0        | 1       | 0        | 1       | 1        | 0       | 1       | 1        | 0       | 1       | 1       | 1       | 1        |
| Slackia           | 2              | 46             | 0        | 0        | 0        | 0       | 0       | 1       | 0        | 0        | 1       | 0        | 1       | 0        | 0       | 0       | 1        | 0       | 0       | 1       | 1       | 0        |
| Smaragdicoccus    | 1              | 3              | 0        | 0        | 0        | 0       | 0       | 0       | 0        | 0        | 0       | 0        | 0       | 0        | 0       | 0       | 0        | 0       | 0       | 0       | 0       | 0        |
| Sodalis           | 2              | 71             | 0        | 0        | 0        | 0       | 0       | 1       | 0        | 0        | 1       | 0        | 1       | 0        | 0       | 0       | 1        | 1       | 1       | 1       | 1       | 1        |
| Solibacillus      | 1              | 23             | 0        | 0        | 0        | 0       | 0       | 0       | 0        | 0        | 0       | 0        | 0       | 0        | 0       | 0       | 0        | 0       | 0       | 1       | 0       | 0        |
| Solitaea          | 1              | 13             | 0        | 0        | 0        | 0       | 0       | 0       | 0        | 0        | 0       | 0        | 0       | 0        | 0       | 0       | 0        | 0       | 0       | 0       | 0       | 0        |
| Sorangium         | 3              | 115            | 0        | 0        | 1        | 0       | 0       | 0       | 0        | 0        | 1       | 0        | 1       | 1        | 1       | 1       | 1        | 0       | 0       | 1       | 1       | 1        |
| Sphaerobacter     | 2              | 100            | 0        | 0        | 0        | 0       | 0       | 1       | 0        | 0        | 1       | 0        | 1       | 1        | 0       | 1       | 1        | 0       | 0       | 1       | 1       | 0        |
| Sphaerochaeta     | 1              | 42             | 0        | 0        | 0        | 0       | 0       | 0       | 0        | 0        | 1       | 0        | 1       | 0        | 0       | 0       | 1        | 1       | 0       | 1       | 0       | 0        |
| Sphingobacterium  | 3              | 85             | 0        | 0        | 0        | 0       | 0       | 0       | 0        | 0        | 1       | 0        | 1       | 1        | 1       | 1       | 1        | 0       | 0       | 1       | 1       | 1        |
| Sphingobium       | 1              | 179            | 0        | 0        | 0        | 0       | 0       | 0       | 0        | 0        | 1       | 0        | 1       | 1        | 0       | 1       | 1        | 0       | 1       | 0       | 1       | 1        |
| Sphingomonadaceae | 1              | 15             | 0        | 0        | 0        | 0       | 0       | 0       | 0        | 0        | 0       | 0        | 0       | 0        | 0       | 1       | 0        | 0       | 0       | 0       | 0       | 1        |
| Sphingomonas      | 2              | 220            | 0        | 0        | 1        | 1       | 0       | 1       | 0        | 0        | 1       | 0        | 1       | 1        | 0       | 1       | 1        | 0       | 0       | 0       | 1       | 1        |
| Sphingopyxis      | 3              | 99             | 0        | 0        | 0        | 0       | 0       | 0       | 0        | 0        | 1       | 0        | 1       | 1        | 0       | 1       | 1        | 0       | 1       | 1       | 1       | 1        |
| Spirochaeta       | 2              | 103            | 0        | 0        | 0        | 0       | 1       | 0       | 0        | 0        | 1       | 0        | 1       | 0        | 0       | 0       | 1        | 1       | 0       | 1       | 1       | 1        |
| Spiroplasma       | 1              | 6              | 0        | 0        | 0        | 0       | 0       | 0       | 0        | 0        | 0       | 0        | 0       | 0        | 0       | 0       | 0        | 0       | 0       | 0       | 0       | 0        |
| Spirosoma         | 2              | 107            | 0        | 0        | 0        | 0       | 0       | 0       | 0        | 0        | 1       | 1        | 1       | 0        | 0       | 1       | 1        | 0       | 0       | 1       | 1       | 1        |
| Stackebrandtia    | 2              | 110            | 1        | 0        | 1        | 0       | 0       | 0       | 0        | 0        | 1       | 0        | 1       | 1        | 1       | 1       | 1        | 0       | 1       | 1       | 1       | 1        |
| Stanieria         | 1              | 17             | 0        | 0        | 0        | 0       | 0       | 0       | 0        | 0        | 0       | 0        | 0       | 0        | 0       | 0       | 0        | 0       | 0       | 0       | 0       | 0        |
| Staphylococcus    | 2              | 108            | 0        | 0        | 0        | 0       | 0       | 1       | 0        | 0        | 1       | 0        | 1       | 1        | 0       | 1       | 1        | 0       | 0       | 1       | 1       | 1        |
| Staphylothermus   | 1              | 12             | 0        | 0        | 0        | 0       | 0       | 0       | 0        | 0        | 0       | 0        | 0       | 0        | 0       | 0       | 0        | 0       | 0       | 0       | 0       | 0        |

| Genus                  | Cluster Number | Protein Counts | 1.3.1.32 | 1.3.1.56 | 1.3.99.- | 1.4.3.4 | 1.6.5.- | 1.7.1.- | 1.8.99.3 | 1.97.1.8 | 2.1.1.- | 2.1.1.67 | 2.3.1.- | 2.3.1.16 | 2.3.1.5 | 2.3.1.9 | 2.4.2.10 | 2.4.2.3 | 2.4.2.4 | 2.4.2.8 | 2.5.1.- | 2.5.1.18 |
|------------------------|----------------|----------------|----------|----------|----------|---------|---------|---------|----------|----------|---------|----------|---------|----------|---------|---------|----------|---------|---------|---------|---------|----------|
| Stappia                | 1              | 2              | 0        | 0        | 0        | 0       | 0       | 0       | 0        | 0        | 0       | 0        | 0       | 0        | 0       | 0       | 0        | 0       | 0       | 0       | 0       | 0        |
| Starkeya               | 3              | 134            | 0        | 0        | 0        | 0       | 0       | 0       | 0        | 0        | 1       | 1        | 1       | 1        | 0       | 1       | 1        | 0       | 1       | 1       | 1       | 1        |
| Stenotrophomonas       | 3              | 104            | 0        | 0        | 0        | 0       | 0       | 1       | 0        | 0        | 1       | 0        | 1       | 1        | 0       | 1       | 1        | 0       | 1       | 1       | 1       | 1        |
| Stigmatella            | 3              | 129            | 0        | 0        | 0        | 0       | 0       | 0       | 0        | 0        | 1       | 0        | 1       | 1        | 0       | 1       | 1        | 0       | 0       | 1       | 1       | 1        |
| Streptobacillus        | 1              | 38             | 0        | 0        | 0        | 0       | 0       | 0       | 0        | 0        | 1       | 0        | 1       | 1        | 0       | 0       | 0        | 0       | 0       | 1       | 0       | 0        |
| Streptococcus          | 2              | 121            | 0        | 0        | 0        | 0       | 0       | 1       | 0        | 0        | 1       | 0        | 1       | 1        | 0       | 1       | 1        | 1       | 0       | 1       | 1       | 1        |
| Streptomyces           | 2              | 253            | 0        | 0        | 1        | 1       | 0       | 0       | 0        | 0        | 1       | 0        | 1       | 1        | 0       | 1       | 1        | 1       | 1       | 1       | 1       | 1        |
| Streptosporangium      | 3              | 148            | 0        | 0        | 1        | 0       | 0       | 0       | 0        | 0        | 1       | 0        | 1       | 1        | 0       | 1       | 1        | 0       | 1       | 1       | 1       | 1        |
| Strigomonas            | 1              | 2              | 0        | 0        | 0        | 0       | 0       | 0       | 0        | 0        | 0       | 0        | 0       | 0        | 0       | 0       | 0        | 0       | 0       | 0       | 0       | 0        |
| Sulfitobacter          | 1              | 10             | 0        | 0        | 0        | 0       | 0       | 0       | 0        | 0        | 0       | 0        | 1       | 0        | 0       | 1       | 0        | 0       | 0       | 0       | 0       | 0        |
| Sulfobacillus          | 1              | 30             | 0        | 0        | 0        | 0       | 0       | 0       | 0        | 0        | 0       | 0        | 0       | 0        | 0       | 0       | 0        | 0       | 0       | 0       | 0       | 0        |
| Sulfolobus             | 1              | 23             | 0        | 0        | 0        | 0       | 0       | 0       | 0        | 0        | 0       | 0        | 0       | 0        | 0       | 0       | 0        | 0       | 0       | 0       | 0       | 0        |
| Sulfuricurvum          | 2              | 67             | 0        | 0        | 0        | 0       | 0       | 0       | 0        | 0        | 1       | 0        | 1       | 0        | 0       | 0       | 1        | 0       | 0       | 0       | 1       | 0        |
| Sulfurihydrogenibium   | 2              | 55             | 0        | 0        | 0        | 0       | 0       | 1       | 0        | 0        | 1       | 0        | 1       | 0        | 0       | 0       | 1        | 0       | 0       | 1       | 1       | 0        |
| Sulfurimonas           | 2              | 60             | 0        | 0        | 0        | 0       | 1       | 1       | 0        | 0        | 1       | 0        | 1       | 0        | 0       | 0       | 1        | 0       | 0       | 0       | 1       | 0        |
| Sulfurospirillum       | 1              | 48             | 0        | 0        | 0        | 0       | 0       | 1       | 0        | 0        | 1       | 0        | 1       | 0        | 0       | 0       | 1        | 0       | 0       | 0       | 0       | 0        |
| Sulfurovum             | 2              | 48             | 0        | 0        | 0        | 0       | 0       | 1       | 0        | 0        | 1       | 0        | 1       | 0        | 0       | 0       | 1        | 0       | 0       | 0       | 1       | 0        |
| Symbiobacterium        | 2              | 68             | 0        | 0        | 0        | 0       | 0       | 0       | 0        | 0        | 1       | 0        | 1       | 1        | 0       | 1       | 1        | 0       | 0       | 1       | 1       | 1        |
| Synechococcus          | 1              | 34             | 0        | 0        | 0        | 0       | 0       | 0       | 0        | 0        | 0       | 0        | 0       | 0        | 0       | 0       | 0        | 0       | 0       | 0       | 0       | 0        |
| Synechocystis          | 1              | 40             | 0        | 0        | 0        | 0       | 0       | 1       | 0        | 0        | 1       | 0        | 1       | 0        | 0       | 0       | 1        | 0       | 0       | 0       | 1       | 0        |
| Synergistetes          | 1              | 27             | 0        | 0        | 0        | 0       | 0       | 0       | 0        | 0        | 1       | 0        | 1       | 0        | 0       | 0       | 1        | 0       | 0       | 1       | 0       | 0        |
| Syntrophobacter        | 2              | 101            | 0        | 0        | 0        | 0       | 0       | 1       | 1        | 0        | 1       | 0        | 1       | 1        | 0       | 1       | 1        | 0       | 0       | 1       | 1       | 0        |
| Syntrophobotulus       | 2              | 71             | 0        | 0        | 0        | 0       | 0       | 0       | 0        | 0        | 1       | 0        | 1       | 0        | 0       | 0       | 1        | 0       | 0       | 1       | 0       | 0        |
| Syntrophomonas         | 2              | 58             | 0        | 0        | 0        | 0       | 0       | 0       | 0        | 0        | 1       | 0        | 1       | 0        | 0       | 1       | 1        | 0       | 0       | 1       | 0       | 0        |
| Syntrophothermus       | 2              | 60             | 0        | 0        | 0        | 0       | 0       | 0       | 0        | 0        | 1       | 0        | 1       | 1        | 0       | 1       | 1        | 0       | 0       | 1       | 1       | 0        |
| Syntrophus             | 2              | 66             | 0        | 0        | 0        | 0       | 0       | 1       | 0        | 0        | 1       | 0        | 1       | 1        | 0       | 1       | 1        | 0       | 0       | 1       | 0       | 0        |
| Tannerella             | 1              | 8              | 0        | 0        | 0        | 0       | 0       | 0       | 0        | 0        | 1       | 0        | 0       | 0        | 0       | 0       | 0        | 0       | 0       | 0       | 0       | 0        |
| Taylorella             | 1              | 43             | 0        | 0        | 0        | 0       | 0       | 0       | 0        | 0        | 1       | 0        | 1       | 0        | 0       | 0       | 1        | 0       | 0       | 0       | 1       | 1        |
| Tepidanaerobacter      | 2              | 55             | 0        | 0        | 0        | 0       | 0       | 0       | 0        | 0        | 1       | 0        | 1       | 0        | 0       | 0       | 1        | 0       | 0       | 1       | 1       | 0        |
| Teredinibacter         | 2              | 109            | 0        | 0        | 0        | 0       | 1       | 0       | 0        | 0        | 1       | 1        | 1       | 1        | 0       | 1       | 1        | 0       | 1       | 1       | 1       | 1        |
| Terrabacter            | 1              | 1              | 0        | 0        | 0        | 0       | 0       | 0       | 0        | 0        | 0       | 0        | 0       | 0        | 0       | 0       | 0        | 0       | 0       | 0       | 0       | 0        |
| Terriglobus            | 2              | 83             | 0        | 0        | 0        | 0       | 0       | 0       | 0        | 0        | 1       | 0        | 1       | 0        | 0       | 0       | 1        | 0       | 0       | 1       | 1       | 1        |
| Tetragenococcus        | 1              | 12             | 0        | 0        | 0        | 0       | 0       | 0       | 0        | 0        | 0       | 0        | 0       | 0        | 0       | 0       | 0        | 0       | 0       | 0       | 0       | 0        |
| Thalassiobium          | 1              | 11             | 0        | 0        | 0        | 0       | 0       | 0       | 0        | 0        | 0       | 0        | 0       | 0        | 0       | 1       | 0        | 0       | 0       | 0       | 0       | 0        |
| Thalassobacter         | 1              | 9              | 0        | 0        | 0        | 0       | 0       | 0       | 0        | 0        | 0       | 0        | 0       | 0        | 0       | 1       | 0        | 0       | 0       | 0       | 0       | 0        |
| Thalassolituus         | 1              | 12             | 0        | 0        | 0        | 0       | 0       | 0       | 0        | 0        | 0       | 0        | 0       | 0        | 0       | 0       | 0        | 0       | 0       | 0       | 0       | 0        |
| Thalassospira          | 1              | 2              | 0        | 0        | 0        | 0       | 0       | 0       | 0        | 0        | 0       | 0        | 0       | 0        | 0       | 0       | 0        | 0       | 0       | 0       | 0       | 0        |
| Thauera                | 1              | 111            | 0        | 0        | 0        | 0       | 1       | 0       | 0        | 0        | 1       | 0        | 1       | 1        | 0       | 1       | 1        | 0       | 1       | 0       | 0       | 0        |
| Thermacetogenium       | 1              | 7              | 0        | 0        | 0        | 0       | 0       | 0       | 0        | 0        | 0       | 0        | 0       | 0        | 0       | 0       | 0        | 0       | 0       | 0       | 0       | 0        |
| Thermaerobacter        | 2              | 79             | 0        | 0        | 0        | 0       | 0       | 0       | 0        | 0        | 1       | 0        | 1       | 1        | 0       | 1       | 1        | 0       | 0       | 1       | 1       | 0        |
| Thermanaerovibrio      | 2              | 58             | 0        | 0        | 0        | 0       | 0       | 0       | 0        | 0        | 1       | 0        | 1       | 0        | 0       | 0       | 1        | 0       | 0       | 1       | 0       | 0        |
| Thermincola            | 2              | 62             | 0        | 0        | 0        | 0       | 0       | 0       | 0        | 0        | 1       | 0        | 1       | 0        | 0       | 0       | 1        | 0       | 0       | 1       | 1       | 0        |
| Thermoanaerobacter     | 2              | 76             | 0        | 0        | 0        | 0       | 0       | 1       | 0        | 0        | 1       | 0        | 1       | 0        | 0       | 1       | 1        | 0       | 1       | 1       | 1       | 0        |
| Thermoanaerobacterium  | 2              | 64             | 0        | 0        | 0        | 0       | 0       | 0       | 0        | 0        | 1       | 0        | 1       | 0        | 0       | 1       | 1        | 0       | 0       | 1       | 1       | 0        |
| Thermobacillus         | 1              | 11             | 0        | 0        | 0        | 0       | 0       | 0       | 0        | 0        | 0       | 0        | 0       | 0        | 0       | 0       | 0        | 0       | 0       | 0       | 0       | 0        |
| Thermobaculum          | 2              | 62             | 0        | 0        | 0        | 0       | 0       | 0       | 0        | 0        | 1       | 0        | 1       | 1        | 0       | 0       | 1        | 0       | 0       | 1       | 1       | 0        |
| Thermobifida           | 2              | 72             | 0        | 0        | 0        | 0       | 0       | 0       | 0        | 0        | 1       | 0        | 1       | 1        | 0       | 1       | 1        | 0       | 0       | 1       | 1       | 0        |
| Thermobispora          | 2              | 109            | 0        | 0        | 0        | 0       | 0       | 0       | 0        | 0        | 1       | 0        | 1       | 1        | 0       | 1       | 1        | 0       | 1       | 1       | 1       | 1        |
| Thermococcus           | 1              | 13             | 0        | 0        | 0        | 0       | 0       | 0       | 0        | 0        | 0       | 0        | 0       | 0        | 0       | 0       | 0        | 0       | 0       | 0       | 0       | 0        |
| Thermocrinis           | 2              | 60             | 0        | 0        | 0        | 0       | 0       | 0       | 0        | 0        | 1       | 0        | 1       | 0        | 0       | 0       | 1        | 0       | 0       | 1       | 1       | 0        |
| Thermodesulfator       | 1              | 10             | 0        | 0        | 0        | 0       | 0       | 0       | 0        | 0        | 0       | 0        | 0       | 0        | 0       | 0       | 0        | 0       | 0       | 0       | 0       | 0        |
| Thermodesulfobacterium | 1              | 9              | 0        | 0        | 0        | 0       | 0       | 0       | 0        | 0        | 0       | 0        | 0       | 0        | 0       | 0       | 0        | 0       | 0       | 0       | 0       | 0        |

| Genus                       | Cluster Number | Protein Counts | 1.3.1.32 | 1.3.1.56 | 1.3.99.- | 1.4.3.4 | 1.6.5.- | 1.7.1.- | 1.8.99.3 | 1.97.1.8 | 2.1.1.- | 2.1.1.67 | 2.3.1.- | 2.3.1.16 | 2.3.1.5 | 2.3.1.9 | 2.4.2.10 | 2.4.2.3 | 2.4.2.4 | 2.4.2.8 | 2.5.1.- | 2.5.1.18 |
|-----------------------------|----------------|----------------|----------|----------|----------|---------|---------|---------|----------|----------|---------|----------|---------|----------|---------|---------|----------|---------|---------|---------|---------|----------|
| <b>Thermodesulfobium</b>    | 1              | 13             | 0        | 0        | 0        | 0       | 0       | 0       | 0        | 0        | 0       | 0        | 0       | 0        | 0       | 0       | 0        | 0       | 0       | 0       | 0       | 0        |
| <b>Thermodesulfovibrio</b>  | 2              | 60             | 0        | 0        | 0        | 0       | 0       | 0       | 1        | 0        | 1       | 0        | 1       | 0        | 0       | 0       | 1        | 0       | 0       | 1       | 1       | 0        |
| <b>Thermofilum</b>          | 1              | 9              | 0        | 0        | 0        | 0       | 0       | 0       | 0        | 0        | 0       | 0        | 0       | 0        | 0       | 0       | 0        | 0       | 0       | 0       | 0       | 0        |
| <b>Thermogladus</b>         | 1              | 7              | 0        | 0        | 0        | 0       | 0       | 0       | 0        | 0        | 0       | 0        | 0       | 0        | 0       | 0       | 0        | 0       | 0       | 0       | 0       | 0        |
| <b>Thermomicrobium</b>      | 2              | 92             | 0        | 0        | 0        | 0       | 0       | 0       | 0        | 0        | 1       | 0        | 1       | 1        | 0       | 0       | 1        | 0       | 0       | 1       | 1       | 0        |
| <b>Thermomonospora</b>      | 2              | 125            | 0        | 0        | 0        | 0       | 0       | 0       | 0        | 0        | 1       | 0        | 1       | 1        | 0       | 1       | 1        | 0       | 1       | 1       | 1       | 1        |
| <b>Thermoplasma</b>         | 1              | 11             | 0        | 0        | 0        | 0       | 0       | 0       | 0        | 0        | 0       | 0        | 0       | 0        | 0       | 0       | 0        | 0       | 0       | 0       | 0       | 0        |
| <b>Thermoplasmatales</b>    | 1              | 6              | 0        | 0        | 0        | 0       | 0       | 0       | 0        | 0        | 0       | 0        | 0       | 0        | 0       | 0       | 0        | 0       | 0       | 0       | 0       | 0        |
| <b>Thermoproteus</b>        | 1              | 12             | 0        | 0        | 0        | 0       | 0       | 0       | 0        | 0        | 0       | 0        | 0       | 0        | 0       | 0       | 0        | 0       | 0       | 0       | 0       | 0        |
| <b>Thermosediminibacter</b> | 2              | 64             | 0        | 0        | 0        | 0       | 0       | 0       | 0        | 0        | 1       | 0        | 1       | 0        | 0       | 0       | 0        | 0       | 0       | 1       | 1       | 0        |
| <b>Thermosipho</b>          | 2              | 70             | 0        | 0        | 0        | 0       | 1       | 0       | 0        | 0        | 1       | 0        | 1       | 1        | 0       | 1       | 1        | 0       | 0       | 1       | 1       | 0        |
| <b>Thermosphaera</b>        | 1              | 10             | 0        | 0        | 0        | 0       | 0       | 0       | 0        | 0        | 0       | 0        | 0       | 0        | 0       | 0       | 0        | 0       | 0       | 0       | 0       | 0        |
| <b>Thermosynechococcus</b>  | 1              | 6              | 0        | 0        | 0        | 0       | 0       | 0       | 0        | 0        | 0       | 0        | 0       | 0        | 0       | 0       | 0        | 0       | 0       | 0       | 0       | 0        |
| <b>Thermotoga</b>           | 2              | 80             | 0        | 0        | 0        | 0       | 1       | 0       | 0        | 0        | 1       | 0        | 1       | 0        | 0       | 1       | 1        | 1       | 0       | 1       | 1       | 0        |
| <b>Thermovibrio</b>         | 2              | 58             | 0        | 0        | 0        | 0       | 0       | 0       | 0        | 0        | 1       | 0        | 1       | 0        | 0       | 0       | 1        | 0       | 1       | 1       | 1       | 0        |
| <b>Thermovirga</b>          | 1              | 9              | 0        | 0        | 0        | 0       | 0       | 0       | 0        | 0        | 0       | 0        | 0       | 0        | 0       | 0       | 0        | 0       | 0       | 0       | 0       | 0        |
| <b>Thermus</b>              | 2              | 107            | 0        | 0        | 0        | 0       | 0       | 0       | 0        | 0        | 1       | 0        | 0       | 1        | 0       | 1       | 1        | 0       | 0       | 1       | 1       | 0        |
| <b>Thioalkalimicrobium</b>  | 1              | 4              | 0        | 0        | 0        | 0       | 0       | 0       | 0        | 0        | 0       | 0        | 0       | 0        | 0       | 0       | 0        | 0       | 0       | 0       | 0       | 0        |
| <b>Thioalkalivibrio</b>     | 2              | 91             | 0        | 0        | 0        | 0       | 0       | 1       | 0        | 0        | 1       | 0        | 1       | 1        | 0       | 0       | 1        | 0       | 1       | 1       | 1       | 1        |
| <b>Thiobaca</b>             | 1              | 2              | 0        | 0        | 0        | 0       | 0       | 0       | 0        | 0        | 0       | 0        | 0       | 0        | 0       | 0       | 0        | 0       | 0       | 0       | 0       | 0        |
| <b>Thiobacillus</b>         | 2              | 67             | 0        | 0        | 0        | 0       | 0       | 1       | 1        | 0        | 1       | 0        | 1       | 0        | 0       | 0       | 1        | 0       | 1       | 1       | 1       | 1        |
| <b>Thiocapsa</b>            | 1              | 2              | 0        | 0        | 0        | 0       | 0       | 0       | 0        | 0        | 0       | 0        | 0       | 0        | 0       | 0       | 0        | 0       | 0       | 0       | 0       | 0        |
| <b>Thiocystis</b>           | 1              | 11             | 0        | 0        | 0        | 0       | 0       | 0       | 0        | 0        | 0       | 0        | 0       | 0        | 0       | 0       | 0        | 0       | 0       | 0       | 0       | 0        |
| <b>Thioflavococcus</b>      | 1              | 13             | 0        | 0        | 0        | 0       | 0       | 0       | 0        | 0        | 0       | 0        | 0       | 0        | 0       | 0       | 0        | 0       | 0       | 0       | 0       | 0        |
| <b>Thiomicrospira</b>       | 2              | 50             | 0        | 0        | 0        | 0       | 0       | 1       | 0        | 0        | 1       | 1        | 1       | 0        | 0       | 0       | 1        | 0       | 0       | 0       | 0       | 0        |
| <b>Thiomonas</b>            | 2              | 85             | 0        | 0        | 0        | 0       | 0       | 0       | 0        | 0        | 1       | 0        | 1       | 1        | 0       | 1       | 1        | 0       | 0       | 0       | 1       | 1        |
| <b>Thiorhodococcus</b>      | 1              | 2              | 0        | 0        | 0        | 0       | 0       | 0       | 0        | 0        | 0       | 0        | 0       | 0        | 0       | 0       | 0        | 0       | 0       | 0       | 0       | 0        |
| <b>Thiothrix</b>            | 1              | 2              | 0        | 0        | 0        | 0       | 0       | 0       | 0        | 0        | 0       | 0        | 0       | 0        | 0       | 0       | 0        | 0       | 0       | 0       | 0       | 0        |
| <b>Tistrella</b>            | 1              | 42             | 0        | 0        | 0        | 0       | 0       | 0       | 0        | 0        | 0       | 0        | 1       | 0        | 0       | 0       | 0        | 0       | 0       | 0       | 0       | 0        |
| <b>Tolumonas</b>            | 2              | 100            | 0        | 0        | 0        | 0       | 1       | 0       | 0        | 0        | 1       | 1        | 1       | 0        | 0       | 0       | 1        | 0       | 1       | 1       | 1       | 1        |
| <b>Transposon</b>           | 1              | 2              | 0        | 0        | 0        | 0       | 0       | 0       | 0        | 0        | 0       | 0        | 0       | 0        | 0       | 0       | 0        | 0       | 0       | 0       | 0       | 0        |
| <b>Treponema</b>            | 1              | 63             | 0        | 0        | 0        | 0       | 1       | 0       | 0        | 0        | 1       | 0        | 1       | 0        | 0       | 0       | 1        | 1       | 0       | 1       | 0       | 0        |
| <b>Trichodesmium</b>        | 2              | 71             | 0        | 0        | 0        | 0       | 0       | 0       | 0        | 0        | 1       | 0        | 1       | 0        | 0       | 0       | 1        | 0       | 0       | 0       | 1       | 1        |
| <b>Trichormus</b>           | 1              | 12             | 0        | 0        | 0        | 0       | 0       | 0       | 0        | 0        | 0       | 0        | 0       | 0        | 0       | 0       | 0        | 0       | 0       | 0       | 0       | 0        |
| <b>Tropheryma</b>           | 2              | 22             | 0        | 0        | 0        | 0       | 0       | 0       | 0        | 0        | 1       | 0        | 1       | 0        | 0       | 0       | 1        | 0       | 0       | 1       | 1       | 0        |
| <b>Truepera</b>             | 2              | 104            | 0        | 0        | 0        | 1       | 0       | 0       | 0        | 0        | 1       | 0        | 1       | 1        | 0       | 1       | 1        | 0       | 0       | 1       | 1       | 0        |
| <b>Tsukamurella</b>         | 2              | 123            | 0        | 0        | 1        | 1       | 0       | 0       | 0        | 0        | 1       | 0        | 1       | 1        | 1       | 1       | 1        | 0       | 1       | 1       | 1       | 1        |
| <b>Turneriella</b>          | 1              | 16             | 0        | 0        | 0        | 0       | 0       | 0       | 0        | 0        | 0       | 0        | 0       | 0        | 0       | 0       | 0        | 0       | 0       | 0       | 0       | 0        |
| <b>Uliginosibacterium</b>   | 1              | 2              | 0        | 0        | 0        | 0       | 0       | 0       | 0        | 0        | 0       | 0        | 0       | 0        | 0       | 0       | 0        | 0       | 0       | 0       | 0       | 0        |
| <b>Ureaplasma</b>           | 1              | 24             | 0        | 0        | 0        | 0       | 0       | 0       | 0        | 0        | 1       | 0        | 1       | 0        | 0       | 0       | 0        | 0       | 1       | 1       | 0       | 0        |
| <b>Ureibacillus</b>         | 1              | 2              | 0        | 0        | 0        | 0       | 0       | 0       | 0        | 0        | 0       | 0        | 0       | 0        | 0       | 0       | 0        | 0       | 0       | 0       | 0       | 0        |
| <b>Variovorax</b>           | 3              | 187            | 0        | 0        | 0        | 0       | 0       | 0       | 0        | 0        | 1       | 0        | 1       | 1        | 0       | 1       | 1        | 0       | 1       | 0       | 1       | 1        |
| <b>Veillonella</b>          | 1              | 54             | 0        | 0        | 0        | 0       | 0       | 1       | 0        | 0        | 1       | 0        | 1       | 0        | 0       | 1       | 1        | 0       | 0       | 1       | 0       | 0        |
| <b>Verminephrobacter</b>    | 3              | 188            | 0        | 0        | 0        | 0       | 1       | 1       | 0        | 0        | 1       | 0        | 1       | 1        | 0       | 1       | 1        | 0       | 1       | 0       | 1       | 1        |
| <b>Verrucosispora</b>       | 3              | 126            | 0        | 0        | 0        | 0       | 0       | 0       | 0        | 0        | 1       | 0        | 1       | 1        | 0       | 1       | 1        | 0       | 1       | 1       | 1       | 1        |
| <b>Vibrio</b>               | 2              | 195            | 0        | 0        | 0        | 0       | 1       | 1       | 0        | 0        | 1       | 1        | 1       | 1        | 0       | 1       | 1        | 1       | 1       | 1       | 1       | 1        |
| <b>Vibrionales</b>          | 1              | 46             | 0        | 0        | 0        | 0       | 1       | 1       | 0        | 0        | 1       | 0        | 1       | 0        | 0       | 1       | 1        | 1       | 1       | 1       | 0       | 1        |
| <b>Vitreoscilla</b>         | 1              | 1              | 0        | 0        | 0        | 0       | 0       | 0       | 0        | 0        | 0       | 0        | 0       | 0        | 0       | 0       | 0        | 0       | 0       | 0       | 0       | 0        |
| <b>Vulcanisaeta</b>         | 1              | 14             | 0        | 0        | 0        | 0       | 0       | 0       | 0        | 0        | 0       | 0        | 0       | 0        | 0       | 0       | 0        | 0       | 0       | 0       | 0       | 0        |
| <b>Waddlia</b>              | 2              | 68             | 0        | 0        | 0        | 0       | 1       | 0       | 0        | 0        | 1       | 0        | 1       | 1        | 0       | 1       | 1        | 0       | 0       | 0       | 1       | 0        |
| <b>Wautersia</b>            | 1              | 2              | 0        | 0        | 0        | 0       | 0       | 0       | 0        | 0        | 0       | 0        | 0       | 0        | 0       | 0       | 0        | 0       | 0       | 0       | 0       | 0        |
| <b>Weeksella</b>            | 2              | 65             | 0        | 0        | 0        | 0       | 0       | 0       | 0        | 0        | 1       | 0        | 1       | 0        | 0       | 1       | 1        | 0       | 0       | 1       | 1       | 0        |

| Genus             | Cluster Number | Protein Counts | 1.3.1.32 | 1.3.1.56 | 1.3.99.- | 1.4.3.4 | 1.6.5.- | 1.7.1.- | 1.8.99.3 | 1.97.1.8 | 2.1.1.- | 2.1.1.67 | 2.3.1.- | 2.3.1.16 | 2.3.1.5 | 2.3.1.9 | 2.4.2.10 | 2.4.2.3 | 2.4.2.4 | 2.4.2.8 | 2.5.1.- | 2.5.1.18 |
|-------------------|----------------|----------------|----------|----------|----------|---------|---------|---------|----------|----------|---------|----------|---------|----------|---------|---------|----------|---------|---------|---------|---------|----------|
| Weissella         | 1              | 14             | 0        | 0        | 0        | 0       | 0       | 0       | 0        | 0        | 0       | 0        | 0       | 0        | 0       | 0       | 0        | 0       | 0       | 0       | 0       | 0        |
| Wenxinia          | 1              | 2              | 0        | 0        | 0        | 0       | 0       | 0       | 0        | 0        | 0       | 0        | 0       | 0        | 0       | 0       | 0        | 0       | 0       | 0       | 0       | 0        |
| Wigglesworthia    | 1              | 29             | 0        | 0        | 0        | 0       | 0       | 0       | 0        | 0        | 1       | 0        | 1       | 0        | 0       | 0       | 1        | 0       | 0       | 0       | 1       | 0        |
| Wolbachia         | 1              | 32             | 0        | 0        | 0        | 0       | 0       | 0       | 0        | 0        | 1       | 0        | 0       | 0        | 0       | 0       | 1        | 0       | 0       | 0       | 1       | 0        |
| Wolinella         | 2              | 51             | 0        | 0        | 0        | 0       | 0       | 1       | 0        | 0        | 1       | 0        | 1       | 0        | 0       | 0       | 1        | 0       | 0       | 0       | 0       | 0        |
| Xanthobacter      | 3              | 176            | 0        | 0        | 0        | 0       | 0       | 0       | 0        | 0        | 1       | 1        | 1       | 1        | 0       | 1       | 1        | 1       | 0       | 1       | 1       | 1        |
| Xanthobacteraceae | 1              | 4              | 0        | 0        | 0        | 0       | 0       | 0       | 0        | 0        | 0       | 0        | 0       | 0        | 0       | 0       | 0        | 0       | 0       | 0       | 0       | 0        |
| Xanthomonadaceae  | 1              | 39             | 0        | 0        | 0        | 0       | 0       | 0       | 0        | 0        | 1       | 0        | 1       | 1        | 0       | 0       | 1        | 0       | 0       | 1       | 1       | 1        |
| Xanthomonas       | 2              | 162            | 0        | 0        | 0        | 0       | 0       | 1       | 0        | 0        | 1       | 1        | 1       | 1        | 0       | 1       | 1        | 0       | 1       | 1       | 1       | 1        |
| Xenorhabdus       | 2              | 127            | 0        | 0        | 0        | 0       | 1       | 0       | 0        | 0        | 1       | 0        | 1       | 1        | 0       | 1       | 1        | 1       | 1       | 1       | 1       | 1        |
| Xylanimonas       | 2              | 66             | 0        | 0        | 0        | 0       | 0       | 0       | 0        | 0        | 1       | 0        | 1       | 1        | 0       | 1       | 1        | 0       | 1       | 1       | 1       | 0        |
| Xylella           | 2              | 52             | 0        | 0        | 0        | 0       | 0       | 1       | 0        | 0        | 1       | 0        | 1       | 0        | 0       | 0       | 1        | 0       | 1       | 1       | 1       | 1        |
| Yersinia          | 2              | 145            | 0        | 0        | 1        | 0       | 1       | 1       | 0        | 0        | 1       | 0        | 1       | 1        | 0       | 1       | 1        | 1       | 1       | 1       | 1       | 1        |
| Yokenella         | 2              | 61             | 0        | 0        | 1        | 0       | 1       | 0       | 0        | 0        | 1       | 0        | 1       | 0        | 0       | 1       | 1        | 1       | 1       | 1       | 1       | 1        |
| Zobellia          | 1              | 28             | 0        | 0        | 0        | 0       | 1       | 0       | 0        | 0        | 0       | 0        | 0       | 0        | 0       | 1       | 0        | 0       | 0       | 0       | 0       | 0        |
| Zunongwangia      | 2              | 98             | 0        | 0        | 0        | 0       | 1       | 0       | 0        | 0        | 1       | 0        | 1       | 1        | 0       | 1       | 1        | 0       | 1       | 1       | 1       | 0        |
| Zymomonas         | 2              | 67             | 0        | 0        | 0        | 0       | 0       | 1       | 0        | 0        | 1       | 0        | 1       | 0        | 0       | 0       | 1        | 0       | 0       | 0       | 1       | 1        |
| Zymophilus        | 1              | 2              | 0        | 0        | 0        | 0       | 0       | 0       | 0        | 0        | 0       | 0        | 0       | 0        | 0       | 0       | 0        | 0       | 0       | 0       | 0       | 0        |

| Genus               | Cluster Number | Protein Counts | 2.6.1.- | 2.7.1.21 | 2.7.1.48 | 2.7.4.- | 2.8.3.- | 2.8.3.1 | 2.8.3.12 | 2.8.3.15 | 2.8.3.6 | 2.8.3.8 | 3.1.1.- | 3.1.1.1 | 3.1.1.17 | 3.1.1.2 | 3.1.1.24 | 3.1.1.45 | 3.1.2.- | 3.1.2.23 | 3.1.3.1 | 3.1.3.2 |
|---------------------|----------------|----------------|---------|----------|----------|---------|---------|---------|----------|----------|---------|---------|---------|---------|----------|---------|----------|----------|---------|----------|---------|---------|
| Acaricomes          | 1              | 2              | 0       | 0        | 0        | 0       | 0       | 0       | 0        | 0        | 0       | 0       | 0       | 0       | 0        | 0       | 0        | 0        | 0       | 0        | 0       | 0       |
| Acaryochloris       | 2              | 88             | 1       | 0        | 1        | 1       | 0       | 0       | 0        | 0        | 0       | 0       | 1       | 1       | 0        | 0       | 1        | 0        | 0       | 0        | 1       | 0       |
| Acetivibrio         | 1              | 2              | 0       | 0        | 0        | 0       | 0       | 0       | 0        | 0        | 0       | 0       | 0       | 0       | 0        | 0       | 0        | 0        | 0       | 0        | 0       | 0       |
| Acetobacter         | 2              | 85             | 0       | 0        | 0        | 1       | 0       | 1       | 0        | 0        | 0       | 0       | 0       | 0       | 1        | 0       | 0        | 0        | 0       | 0        | 0       | 0       |
| Acetobacteraceae    | 1              | 2              | 0       | 0        | 0        | 0       | 0       | 0       | 0        | 0        | 0       | 0       | 0       | 0       | 0        | 0       | 0        | 0        | 0       | 0        | 0       | 0       |
| Acetobacterium      | 1              | 8              | 0       | 0        | 0        | 0       | 0       | 0       | 0        | 0        | 0       | 0       | 0       | 0       | 0        | 0       | 0        | 0        | 0       | 0        | 0       | 0       |
| Acetohalobium       | 2              | 79             | 0       | 0        | 0        | 1       | 0       | 0       | 0        | 0        | 0       | 0       | 1       | 0       | 0        | 0       | 0        | 0        | 0       | 0        | 0       | 0       |
| Acholeplasma        | 2              | 38             | 0       | 1        | 1        | 1       | 0       | 0       | 0        | 0        | 0       | 0       | 0       | 1       | 0        | 0       | 0        | 0        | 0       | 0        | 0       | 0       |
| Achromobacter       | 2              | 192            | 0       | 0        | 0        | 1       | 0       | 0       | 0        | 0        | 1       | 0       | 1       | 0       | 1        | 1       | 1        | 0        | 0       | 1        | 1       | 0       |
| Acidaminococcus     | 1              | 65             | 0       | 0        | 1        | 1       | 0       | 0       | 1        | 0        | 0       | 0       | 0       | 0       | 0        | 0       | 0        | 0        | 0       | 0        | 1       | 0       |
| Acidianus           | 1              | 9              | 0       | 0        | 0        | 0       | 0       | 0       | 0        | 0        | 0       | 0       | 0       | 0       | 0        | 0       | 0        | 0        | 0       | 0        | 0       | 0       |
| Acidilobus          | 1              | 8              | 0       | 0        | 0        | 0       | 0       | 0       | 0        | 0        | 0       | 0       | 0       | 0       | 0        | 0       | 0        | 0        | 0       | 0        | 0       | 0       |
| Acidimicrobium      | 2              | 58             | 0       | 0        | 1        | 1       | 0       | 0       | 0        | 0        | 0       | 0       | 0       | 0       | 0        | 0       | 0        | 0        | 1       | 0        | 0       | 0       |
| Acidiphilium        | 3              | 144            | 0       | 0        | 0        | 1       | 0       | 0       | 0        | 0        | 1       | 0       | 1       | 0       | 1        | 0       | 1        | 0        | 0       | 0        | 0       | 1       |
| Acidithiobacillus   | 2              | 70             | 0       | 0        | 0        | 1       | 0       | 0       | 0        | 0        | 0       | 0       | 1       | 0       | 0        | 0       | 0        | 0        | 0       | 0        | 0       | 0       |
| Acidobacterium      | 2              | 91             | 1       | 0        | 1        | 1       | 0       | 0       | 0        | 0        | 0       | 0       | 1       | 0       | 1        | 1       | 1        | 0        | 0       | 0        | 0       | 1       |
| Acidocella          | 1              | 2              | 0       | 0        | 0        | 0       | 0       | 0       | 0        | 0        | 0       | 0       | 0       | 0       | 0        | 0       | 0        | 0        | 0       | 0        | 0       | 0       |
| Acidothermus        | 2              | 68             | 0       | 0        | 0        | 1       | 0       | 0       | 1        | 0        | 0       | 0       | 0       | 0       | 1        | 0       | 1        | 0        | 0       | 0        | 0       | 1       |
| Acidovorax          | 3              | 217            | 0       | 0        | 0        | 1       | 0       | 0       | 0        | 0        | 1       | 0       | 1       | 1       | 1        | 1       | 1        | 0        | 0       | 1        | 1       | 0       |
| Aciduliprofundum    | 1              | 11             | 0       | 0        | 0        | 0       | 0       | 0       | 0        | 0        | 0       | 0       | 0       | 0       | 0        | 0       | 0        | 0        | 0       | 0        | 0       | 0       |
| Acinetobacter       | 3              | 188            | 0       | 0        | 0        | 1       | 0       | 0       | 0        | 0        | 1       | 1       | 0       | 0       | 0        | 1       | 1        | 0        | 1       | 0        | 1       | 0       |
| Actinobacillus      | 2              | 112            | 0       | 1        | 1        | 1       | 0       | 0       | 0        | 0        | 0       | 0       | 1       | 0       | 1        | 0       | 0        | 0        | 1       | 0        | 1       | 1       |
| Actinomadura        | 1              | 1              | 0       | 0        | 0        | 0       | 0       | 0       | 0        | 0        | 0       | 0       | 0       | 0       | 0        | 0       | 0        | 0        | 0       | 0        | 0       | 0       |
| Actinoplanes        | 1              | 52             | 0       | 0        | 0        | 0       | 0       | 0       | 0        | 0        | 0       | 0       | 0       | 0       | 0        | 0       | 0        | 0        | 0       | 0        | 0       | 0       |
| Actinopolyspora     | 1              | 2              | 0       | 0        | 0        | 0       | 0       | 0       | 0        | 0        | 0       | 0       | 0       | 0       | 0        | 0       | 0        | 0        | 0       | 0        | 0       | 0       |
| Actinosynnema       | 2              | 122            | 0       | 1        | 1        | 1       | 0       | 0       | 1        | 0        | 1       | 0       | 0       | 0       | 1        | 0       | 1        | 0        | 1       | 0        | 1       | 0       |
| Advenella           | 1              | 30             | 0       | 0        | 0        | 0       | 0       | 0       | 0        | 0        | 0       | 0       | 0       | 0       | 0        | 0       | 0        | 0        | 0       | 0        | 0       | 0       |
| Aequorivita         | 1              | 12             | 0       | 0        | 0        | 0       | 0       | 0       | 0        | 0        | 0       | 0       | 0       | 0       | 0        | 0       | 0        | 0        | 0       | 0        | 0       | 0       |
| Aerococcus          | 2              | 57             | 0       | 1        | 0        | 1       | 0       | 0       | 0        | 0        | 0       | 1       | 0       | 1       | 0        | 0       | 0        | 0        | 0       | 0        | 0       | 0       |
| Aeromonas           | 2              | 127            | 1       | 1        | 1        | 1       | 0       | 0       | 0        | 0        | 0       | 0       | 1       | 0       | 0        | 1       | 1        | 0        | 1       | 0        | 1       | 1       |
| Aeropyrum           | 1              | 13             | 0       | 0        | 0        | 0       | 0       | 0       | 0        | 0        | 0       | 0       | 0       | 0       | 0        | 0       | 0        | 0        | 0       | 0        | 0       | 0       |
| Afipia              | 1              | 54             | 0       | 0        | 0        | 1       | 0       | 0       | 1        | 0        | 0       | 0       | 0       | 0       | 0        | 0       | 0        | 0        | 0       | 0        | 0       | 0       |
| Aggregatibacter     | 1              | 81             | 0       | 1        | 1        | 1       | 0       | 0       | 0        | 0        | 0       | 0       | 1       | 0       | 0        | 0       | 0        | 0        | 1       | 0        | 0       | 1       |
| Agrobacterium       | 2              | 242            | 0       | 1        | 1        | 1       | 0       | 0       | 0        | 0        | 1       | 1       | 1       | 1       | 1        | 1       | 1        | 0        | 1       | 0        | 1       | 1       |
| Ahrensia            | 1              | 2              | 0       | 0        | 0        | 0       | 0       | 0       | 0        | 0        | 0       | 0       | 0       | 0       | 0        | 0       | 0        | 0        | 0       | 0        | 0       | 0       |
| Akkermansia         | 2              | 47             | 0       | 0        | 0        | 1       | 0       | 0       | 0        | 0        | 0       | 0       | 1       | 0       | 0        | 0       | 0        | 0        | 0       | 0        | 1       | 0       |
| Albidiferax         | 3              | 144            | 1       | 1        | 0        | 1       | 0       | 0       | 0        | 0        | 1       | 0       | 1       | 1       | 1        | 1       | 1        | 0        | 1       | 0        | 1       | 0       |
| Alcaligenes         | 1              | 21             | 0       | 0        | 0        | 1       | 0       | 0       | 0        | 0        | 0       | 0       | 0       | 0       | 0        | 0       | 0        | 0        | 0       | 0        | 0       | 0       |
| Alcanivorax         | 2              | 146            | 0       | 0        | 0        | 1       | 0       | 0       | 0        | 0        | 0       | 0       | 0       | 0       | 0        | 1       | 0        | 0        | 1       | 1        | 1       | 0       |
| Alicyclophilus      | 3              | 152            | 0       | 0        | 0        | 1       | 0       | 0       | 0        | 0        | 1       | 0       | 1       | 1       | 0        | 1       | 1        | 0        | 0       | 0        | 1       | 0       |
| Alicyclobacillus    | 2              | 91             | 1       | 1        | 0        | 1       | 0       | 0       | 0        | 0        | 0       | 0       | 1       | 0       | 0        | 0       | 0        | 0        | 0       | 0        | 0       | 0       |
| Aliivibrio          | 2              | 118            | 0       | 1        | 1        | 1       | 0       | 0       | 0        | 0        | 0       | 0       | 1       | 0       | 0        | 1       | 0        | 0        | 1       | 0        | 1       | 0       |
| Alishewanella       | 1              | 1              | 0       | 0        | 0        | 0       | 0       | 0       | 0        | 0        | 0       | 0       | 0       | 0       | 0        | 0       | 0        | 0        | 0       | 0        | 0       | 0       |
| Alistipes           | 1              | 52             | 0       | 1        | 1        | 1       | 0       | 0       | 0        | 0        | 0       | 0       | 0       | 1       | 0        | 0       | 0        | 0        | 0       | 1        | 0       | 0       |
| Alkalilimnicola     | 2              | 97             | 1       | 0        | 0        | 1       | 0       | 0       | 0        | 0        | 0       | 0       | 0       | 0       | 0        | 1       | 1        | 0        | 0       | 0        | 0       | 0       |
| Alkaliphilus        | 2              | 62             | 0       | 1        | 1        | 1       | 0       | 0       | 0        | 0        | 0       | 1       | 0       | 0       | 0        | 0       | 0        | 0        | 0       | 0        | 1       | 0       |
| Allochromatium      | 2              | 84             | 1       | 0        | 0        | 1       | 0       | 0       | 0        | 0        | 0       | 0       | 1       | 0       | 0        | 1       | 0        | 0        | 0       | 0        | 1       | 0       |
| Alphaproteobacteria | 1              | 3              | 0       | 0        | 0        | 0       | 0       | 0       | 0        | 0        | 0       | 0       | 0       | 0       | 0        | 0       | 0        | 0        | 0       | 0        | 0       | 0       |
| Alteromonadales     | 1              | 12             | 0       | 0        | 1        | 0       | 0       | 0       | 0        | 0        | 0       | 0       | 0       | 0       | 0        | 0       | 0        | 0        | 0       | 0        | 0       | 0       |
| Alteromonas         | 1              | 37             | 0       | 0        | 0        | 0       | 0       | 0       | 0        | 0        | 0       | 0       | 0       | 0       | 0        | 0       | 0        | 0        | 0       | 0        | 1       | 0       |
| Aminobacter         | 1              | 4              | 0       | 0        | 0        | 0       | 0       | 0       | 0        | 0        | 0       | 0       | 0       | 0       | 0        | 0       | 0        | 0        | 0       | 0        | 0       | 0       |
| Aminobacterium      | 2              | 59             | 1       | 0        | 1        | 1       | 0       | 0       | 0        | 0        | 0       | 0       | 1       | 0       | 0        | 0       | 0        | 0        | 0       | 0        | 1       | 0       |

| Genus            | Cluster Number | Protein Counts | 2.6.1.- | 2.7.1.21 | 2.7.1.48 | 2.7.4.- | 2.8.3.- | 2.8.3.1 | 2.8.3.12 | 2.8.3.15 | 2.8.3.6 | 2.8.3.8 | 3.1.1.- | 3.1.1.1 | 3.1.1.17 | 3.1.1.2 | 3.1.1.24 | 3.1.1.45 | 3.1.2.- | 3.1.2.23 | 3.1.3.1 | 3.1.3.2 |
|------------------|----------------|----------------|---------|----------|----------|---------|---------|---------|----------|----------|---------|---------|---------|---------|----------|---------|----------|----------|---------|----------|---------|---------|
| Ammonifex        | 2              | 50             | 0       | 0        | 1        | 1       | 0       | 0       | 0        | 0        | 0       | 0       | 0       | 0       | 0        | 0       | 0        | 0        | 0       | 0        | 0       | 0       |
| Amphibacillus    | 1              | 13             | 0       | 0        | 0        | 0       | 0       | 0       | 0        | 0        | 0       | 0       | 0       | 0       | 0        | 0       | 0        | 0        | 0       | 0        | 0       | 0       |
| Amphritea        | 1              | 2              | 0       | 0        | 0        | 0       | 0       | 0       | 0        | 0        | 0       | 0       | 0       | 0       | 0        | 0       | 0        | 0        | 0       | 0        | 0       | 0       |
| Amycolatopsis    | 2              | 201            | 0       | 1        | 1        | 1       | 1       | 0       | 1        | 0        | 0       | 0       | 1       | 0       | 1        | 0       | 1        | 0        | 1       | 0        | 1       | 1       |
| Amycolobicoccus  | 1              | 43             | 0       | 0        | 0        | 0       | 0       | 0       | 0        | 0        | 0       | 0       | 0       | 0       | 0        | 0       | 0        | 0        | 0       | 0        | 0       | 0       |
| Anabaena         | 2              | 92             | 0       | 0        | 1        | 1       | 0       | 0       | 0        | 0        | 0       | 0       | 0       | 0       | 0        | 1       | 0        | 0        | 0       | 0        | 0       | 1       |
| Anaerobaculum    | 1              | 11             | 0       | 0        | 0        | 0       | 0       | 0       | 0        | 0        | 0       | 0       | 0       | 0       | 0        | 0       | 0        | 0        | 0       | 0        | 0       | 0       |
| Anaerococcus     | 2              | 46             | 1       | 1        | 1        | 1       | 0       | 0       | 0        | 0        | 0       | 0       | 0       | 0       | 0        | 0       | 0        | 0        | 0       | 0        | 0       | 0       |
| Anaerolinea      | 2              | 66             | 1       | 1        | 1        | 1       | 0       | 0       | 1        | 0        | 0       | 0       | 1       | 0       | 0        | 0       | 1        | 0        | 0       | 1        | 1       | 0       |
| Anaeromyxobacter | 3              | 117            | 0       | 0        | 1        | 1       | 0       | 0       | 0        | 0        | 1       | 0       | 0       | 1       | 0        | 0       | 1        | 0        | 0       | 0        | 0       | 1       |
| Anaerostipes     | 1              | 44             | 0       | 0        | 1        | 1       | 0       | 0       | 0        | 0        | 0       | 0       | 0       | 0       | 0        | 0       | 0        | 0        | 0       | 0        | 0       | 0       |
| Anaerotruncus    | 1              | 2              | 0       | 0        | 0        | 0       | 0       | 0       | 0        | 0        | 0       | 0       | 0       | 0       | 0        | 0       | 0        | 0        | 0       | 0        | 0       | 0       |
| Anaplasma        | 1              | 35             | 0       | 0        | 0        | 1       | 0       | 0       | 0        | 0        | 0       | 0       | 1       | 0       | 0        | 0       | 0        | 0        | 0       | 0        | 0       | 0       |
| Ancylobacter     | 1              | 3              | 0       | 0        | 0        | 0       | 0       | 0       | 0        | 0        | 0       | 0       | 0       | 0       | 0        | 0       | 0        | 0        | 0       | 0        | 0       | 0       |
| Aneurinibacillus | 1              | 1              | 0       | 0        | 0        | 0       | 0       | 0       | 0        | 0        | 0       | 0       | 0       | 0       | 0        | 0       | 0        | 0        | 0       | 0        | 0       | 0       |
| Angomonas        | 1              | 1              | 0       | 0        | 0        | 0       | 0       | 0       | 0        | 0        | 0       | 0       | 0       | 0       | 0        | 0       | 0        | 0        | 0       | 0        | 0       | 0       |
| Anoxybacillus    | 2              | 72             | 1       | 1        | 1        | 1       | 0       | 0       | 0        | 0        | 0       | 0       | 1       | 1       | 0        | 0       | 0        | 0        | 0       | 0        | 0       | 0       |
| Aquifex          | 2              | 45             | 0       | 0        | 0        | 1       | 0       | 0       | 0        | 0        | 0       | 0       | 0       | 0       | 0        | 0       | 0        | 0        | 0       | 0        | 0       | 0       |
| Aquimarina       | 1              | 2              | 0       | 0        | 0        | 0       | 0       | 0       | 0        | 0        | 0       | 0       | 0       | 0       | 0        | 0       | 0        | 0        | 0       | 0        | 0       | 0       |
| Arcanobacterium  | 2              | 45             | 0       | 1        | 1        | 1       | 1       | 0       | 0        | 0        | 0       | 0       | 1       | 0       | 0        | 0       | 1        | 0        | 1       | 0        | 0       | 0       |
| Archaeoglobus    | 1              | 14             | 0       | 0        | 0        | 0       | 0       | 0       | 0        | 0        | 0       | 0       | 0       | 0       | 0        | 0       | 0        | 0        | 0       | 0        | 0       | 0       |
| Arcobacter       | 2              | 101            | 1       | 0        | 0        | 1       | 0       | 0       | 0        | 0        | 0       | 0       | 1       | 0       | 0        | 0       | 1        | 0        | 0       | 0        | 1       | 0       |
| Aromatoleum      | 3              | 133            | 0       | 0        | 0        | 1       | 0       | 0       | 0        | 1        | 0       | 0       | 1       | 0       | 0        | 1       | 1        | 0        | 0       | 1        | 1       | 0       |
| Arsenophonus     | 1              | 4              | 0       | 0        | 0        | 1       | 0       | 0       | 0        | 0        | 0       | 0       | 0       | 0       | 0        | 0       | 0        | 0        | 0       | 0        | 0       | 0       |
| Arthrobacter     | 2              | 206            | 1       | 1        | 1        | 1       | 0       | 1       | 0        | 0        | 1       | 0       | 1       | 0       | 1        | 0       | 1        | 0        | 1       | 1        | 1       | 0       |
| Arthrospira      | 2              | 67             | 0       | 0        | 1        | 1       | 0       | 0       | 0        | 0        | 0       | 0       | 0       | 0       | 0        | 0       | 0        | 0        | 0       | 0        | 1       | 0       |
| Aster            | 1              | 10             | 0       | 1        | 1        | 1       | 0       | 0       | 0        | 0        | 0       | 0       | 0       | 0       | 0        | 0       | 0        | 0        | 0       | 0        | 0       | 0       |
| Asticcacaulis    | 2              | 103            | 0       | 1        | 0        | 1       | 0       | 0       | 0        | 0        | 0       | 0       | 1       | 0       | 1        | 0       | 0        | 0        | 0       | 0        | 1       | 0       |
| Atopobium        | 1              | 28             | 0       | 0        | 0        | 1       | 0       | 0       | 0        | 0        | 0       | 0       | 1       | 0       | 0        | 0       | 0        | 0        | 0       | 0        | 0       | 0       |
| Aurantimonas     | 1              | 2              | 0       | 0        | 0        | 0       | 0       | 0       | 0        | 0        | 0       | 0       | 0       | 0       | 0        | 0       | 0        | 0        | 0       | 0        | 0       | 0       |
| Avibacterium     | 1              | 17             | 0       | 0        | 0        | 1       | 0       | 0       | 0        | 0        | 0       | 0       | 1       | 0       | 0        | 0       | 0        | 0        | 0       | 0        | 0       | 0       |
| Azoarcus         | 3              | 172            | 0       | 0        | 0        | 1       | 0       | 0       | 0        | 0        | 0       | 0       | 1       | 0       | 1        | 1       | 0        | 0        | 0       | 1        | 1       | 0       |
| Azorhizobium     | 3              | 149            | 0       | 0        | 0        | 1       | 0       | 0       | 0        | 0        | 1       | 0       | 1       | 1       | 1        | 1       | 1        | 0        | 1       | 0        | 1       | 1       |
| Azorhizophilus   | 1              | 4              | 0       | 0        | 0        | 0       | 0       | 0       | 0        | 0        | 0       | 0       | 0       | 0       | 0        | 0       | 0        | 0        | 0       | 0        | 0       | 0       |
| Azospira         | 1              | 19             | 0       | 0        | 0        | 0       | 0       | 0       | 0        | 0        | 0       | 0       | 0       | 0       | 0        | 0       | 0        | 0        | 0       | 0        | 0       | 0       |
| Azospirillum     | 2              | 198            | 1       | 0        | 0        | 1       | 0       | 0       | 1        | 0        | 0       | 1       | 1       | 0       | 1        | 1       | 1        | 0        | 0       | 1        | 1       | 0       |
| Azotobacter      | 3              | 183            | 0       | 0        | 0        | 1       | 0       | 0       | 1        | 0        | 0       | 1       | 0       | 0       | 1        | 1       | 1        | 0        | 1       | 0        | 1       | 0       |
| Bacillales       | 1              | 9              | 0       | 0        | 0        | 0       | 0       | 0       | 0        | 0        | 0       | 0       | 0       | 0       | 0        | 0       | 0        | 0        | 0       | 0        | 0       | 0       |
| Bacilli          | 1              | 3              | 0       | 0        | 0        | 0       | 0       | 0       | 0        | 0        | 0       | 0       | 0       | 0       | 0        | 0       | 0        | 0        | 0       | 0        | 0       | 0       |
| Bacillus         | 2              | 237            | 1       | 1        | 1        | 1       | 0       | 0       | 0        | 0        | 0       | 1       | 1       | 1       | 1        | 1       | 1        | 0        | 0       | 0        | 1       | 1       |
| Bacteria         | 2              | 86             | 0       | 0        | 0        | 1       | 0       | 0       | 0        | 0        | 1       | 0       | 1       | 1       | 0        | 1       | 1        | 0        | 0       | 1        | 0       | 0       |
| Bacteriovorax    | 2              | 98             | 0       | 1        | 1        | 1       | 0       | 0       | 0        | 0        | 0       | 0       | 1       | 1       | 0        | 1       | 0        | 0        | 0       | 0        | 1       | 1       |
| Bacteroidales    | 2              | 59             | 0       | 1        | 1        | 1       | 0       | 0       | 0        | 0        | 0       | 0       | 0       | 1       | 1        | 0       | 0        | 0        | 0       | 0        | 1       | 0       |
| Bacteroides      | 2              | 96             | 1       | 1        | 1        | 1       | 0       | 0       | 0        | 0        | 0       | 0       | 0       | 1       | 1        | 0       | 0        | 0        | 0       | 1        | 1       | 1       |
| Bacteroidetes    | 1              | 2              | 0       | 0        | 0        | 0       | 0       | 0       | 0        | 0        | 0       | 0       | 0       | 0       | 0        | 0       | 0        | 0        | 0       | 0        | 0       | 0       |
| Bartonella       | 2              | 50             | 0       | 0        | 0        | 1       | 0       | 0       | 0        | 0        | 0       | 0       | 1       | 0       | 0        | 0       | 0        | 0        | 1       | 0        | 0       | 0       |
| Baumannia        | 2              | 24             | 0       | 0        | 0        | 1       | 0       | 0       | 0        | 0        | 0       | 0       | 0       | 0       | 0        | 0       | 0        | 0        | 0       | 0        | 0       | 0       |
| Bdellovibrio     | 2              | 87             | 0       | 1        | 1        | 1       | 0       | 0       | 0        | 0        | 0       | 0       | 1       | 1       | 0        | 1       | 1        | 0        | 0       | 0        | 0       | 0       |
| Beijerinckia     | 3              | 123            | 0       | 0        | 1        | 1       | 0       | 0       | 0        | 0        | 0       | 0       | 1       | 0       | 1        | 1       | 1        | 0        | 1       | 0        | 1       | 1       |
| Belliella        | 1              | 14             | 0       | 0        | 0        | 0       | 0       | 0       | 0        | 0        | 0       | 0       | 0       | 0       | 0        | 0       | 0        | 0        | 0       | 0        | 0       | 0       |
| Beutenbergia     | 2              | 82             | 0       | 1        | 1        | 1       | 0       | 0       | 0        | 0        | 0       | 0       | 0       | 1       | 1        | 0       | 1        | 0        | 1       | 0        | 1       | 0       |
| Bifidobacterium  | 2              | 61             | 0       | 0        | 1        | 1       | 0       | 0       | 0        | 0        | 0       | 0       | 0       | 0       | 0        | 0       | 0        | 0        | 1       | 0        | 1       | 0       |

| Genus                | Cluster Number | Protein Counts | 2.6.1.- | 2.7.1.21 | 2.7.1.48 | 2.7.4.- | 2.8.3.- | 2.8.3.1 | 2.8.3.12 | 2.8.3.15 | 2.8.3.6 | 2.8.3.8 | 3.1.1.- | 3.1.1.1 | 3.1.1.17 | 3.1.1.2 | 3.1.1.24 | 3.1.1.45 | 3.1.2.- | 3.1.2.23 | 3.1.3.1 | 3.1.3.2 |
|----------------------|----------------|----------------|---------|----------|----------|---------|---------|---------|----------|----------|---------|---------|---------|---------|----------|---------|----------|----------|---------|----------|---------|---------|
| Bizonia              | 1              | 1              | 0       | 0        | 0        | 0       | 0       | 0       | 0        | 0        | 0       | 0       | 0       | 0       | 0        | 0       | 0        | 0        | 0       | 0        | 0       | 0       |
| Blastococcus         | 1              | 39             | 0       | 0        | 0        | 0       | 0       | 0       | 0        | 0        | 0       | 0       | 0       | 0       | 0        | 0       | 0        | 0        | 0       | 0        | 0       | 0       |
| Blattabacterium      | 1              | 23             | 0       | 0        | 0        | 1       | 0       | 0       | 0        | 0        | 0       | 0       | 0       | 0       | 0        | 0       | 0        | 0        | 0       | 0        | 0       | 0       |
| Blautia              | 1              | 22             | 0       | 0        | 0        | 0       | 0       | 0       | 0        | 0        | 0       | 0       | 1       | 0       | 0        | 0       | 0        | 0        | 0       | 0        | 0       | 0       |
| Bordetella           | 3              | 227            | 1       | 0        | 0        | 1       | 0       | 0       | 1        | 0        | 1       | 0       | 1       | 0       | 1        | 1       | 1        | 1        | 0       | 1        | 0       | 0       |
| Borrelia             | 1              | 32             | 0       | 1        | 1        | 1       | 0       | 0       | 0        | 0        | 0       | 0       | 0       | 0       | 0        | 0       | 0        | 0        | 0       | 0        | 0       | 0       |
| Brachybacterium      | 1              | 18             | 0       | 0        | 0        | 0       | 0       | 0       | 0        | 0        | 0       | 0       | 0       | 0       | 0        | 0       | 0        | 0        | 0       | 0        | 0       | 0       |
| Brachymonas          | 1              | 4              | 0       | 0        | 0        | 0       | 0       | 0       | 0        | 0        | 0       | 0       | 0       | 0       | 0        | 0       | 0        | 0        | 0       | 0        | 0       | 0       |
| Brachyspira          | 2              | 79             | 1       | 0        | 0        | 1       | 0       | 0       | 0        | 0        | 0       | 1       | 1       | 0       | 0        | 0       | 0        | 0        | 0       | 0        | 1       | 0       |
| Bradyrhizobiaceae    | 1              | 20             | 0       | 0        | 0        | 0       | 0       | 0       | 0        | 0        | 0       | 0       | 0       | 0       | 0        | 0       | 0        | 0        | 0       | 0        | 0       | 0       |
| Bradyrhizobium       | 3              | 254            | 0       | 0        | 1        | 1       | 0       | 0       | 0        | 0        | 0       | 0       | 1       | 1       | 1        | 1       | 0        | 0        | 1       | 0        | 0       | 0       |
| Brenneria            | 1              | 20             | 0       | 0        | 1        | 1       | 0       | 0       | 0        | 0        | 0       | 0       | 1       | 0       | 0        | 0       | 0        | 0        | 0       | 0        | 0       | 0       |
| Brevibacillus        | 2              | 122            | 0       | 1        | 1        | 1       | 0       | 0       | 0        | 0        | 0       | 1       | 1       | 1       | 0        | 0       | 1        | 0        | 0       | 0        | 1       | 0       |
| Brevibacterium       | 1              | 4              | 0       | 0        | 0        | 0       | 0       | 0       | 0        | 0        | 0       | 0       | 0       | 0       | 0        | 0       | 0        | 0        | 0       | 0        | 0       | 0       |
| Brevundimonas        | 2              | 105            | 0       | 0        | 1        | 1       | 0       | 0       | 0        | 0        | 1       | 0       | 1       | 0       | 0        | 1       | 1        | 0        | 0       | 0        | 1       | 0       |
| Brucella             | 3              | 138            | 0       | 0        | 0        | 1       | 0       | 1       | 0        | 0        | 1       | 0       | 1       | 1       | 1        | 1       | 1        | 0        | 1       | 0        | 1       | 0       |
| Buchnera             | 1              | 26             | 0       | 0        | 0        | 1       | 0       | 0       | 0        | 0        | 0       | 0       | 0       | 0       | 0        | 0       | 0        | 0        | 0       | 0        | 0       | 0       |
| Burkholderia         | 3              | 424            | 1       | 0        | 0        | 1       | 0       | 0       | 1        | 0        | 1       | 1       | 1       | 1       | 1        | 1       | 1        | 1        | 1       | 1        | 1       | 1       |
| Burkholderiaceae     | 3              | 143            | 0       | 0        | 0        | 1       | 0       | 0       | 0        | 0        | 1       | 1       | 1       | 0       | 1        | 0       | 1        | 0        | 0       | 1        | 0       | 0       |
| Burkholderiales      | 1              | 24             | 0       | 0        | 0        | 1       | 0       | 0       | 0        | 0        | 0       | 0       | 0       | 0       | 0        | 0       | 0        | 1        | 0       | 0        | 0       | 0       |
| Buttiauxella         | 1              | 2              | 0       | 0        | 0        | 0       | 0       | 0       | 0        | 0        | 0       | 0       | 0       | 0       | 0        | 0       | 0        | 0        | 0       | 0        | 0       | 0       |
| Butyrivibrio         | 2              | 67             | 1       | 1        | 1        | 1       | 0       | 0       | 0        | 0        | 0       | 0       | 1       | 0       | 0        | 0       | 1        | 0        | 0       | 0        | 0       | 0       |
| Caldanaerobacter     | 2              | 63             | 1       | 1        | 1        | 1       | 0       | 0       | 0        | 0        | 0       | 0       | 0       | 0       | 0        | 0       | 0        | 0        | 0       | 0        | 0       | 0       |
| Caldicellulosiruptor | 2              | 75             | 0       | 0        | 1        | 1       | 0       | 0       | 0        | 0        | 0       | 0       | 0       | 0       | 0        | 0       | 0        | 0        | 0       | 0        | 1       | 0       |
| Caldilinea           | 1              | 23             | 0       | 0        | 0        | 0       | 0       | 0       | 0        | 0        | 0       | 0       | 0       | 0       | 0        | 0       | 0        | 0        | 0       | 0        | 0       | 0       |
| Caldimonas           | 1              | 6              | 0       | 0        | 0        | 1       | 0       | 0       | 0        | 0        | 0       | 1       | 0       | 0       | 0        | 0       | 0        | 0        | 0       | 0        | 0       | 0       |
| Caldisericum         | 1              | 10             | 0       | 0        | 0        | 0       | 0       | 0       | 0        | 0        | 0       | 0       | 0       | 0       | 0        | 0       | 0        | 0        | 0       | 0        | 0       | 0       |
| Caldisphaera         | 1              | 7              | 0       | 0        | 0        | 0       | 0       | 0       | 0        | 0        | 0       | 0       | 0       | 0       | 0        | 0       | 0        | 0        | 0       | 0        | 0       | 0       |
| Calditerrivibrio     | 2              | 74             | 1       | 0        | 0        | 1       | 0       | 0       | 0        | 0        | 0       | 0       | 1       | 0       | 0        | 0       | 1        | 0        | 0       | 0        | 1       | 0       |
| Caldivirga           | 1              | 13             | 0       | 0        | 0        | 0       | 0       | 0       | 0        | 0        | 0       | 0       | 0       | 0       | 0        | 0       | 0        | 0        | 0       | 0        | 0       | 0       |
| Calothrix            | 1              | 43             | 0       | 0        | 1        | 1       | 0       | 0       | 0        | 0        | 0       | 0       | 0       | 0       | 0        | 0       | 0        | 0        | 0       | 0        | 0       | 0       |
| Calyptogena          | 2              | 34             | 0       | 0        | 0        | 1       | 0       | 0       | 0        | 0        | 0       | 0       | 0       | 0       | 0        | 0       | 0        | 0        | 0       | 0        | 0       | 0       |
| Campylobacter        | 2              | 80             | 1       | 1        | 0        | 1       | 0       | 0       | 0        | 0        | 0       | 0       | 1       | 0       | 0        | 0       | 0        | 0        | 1       | 0        | 1       | 0       |
| Candidatus           | 2              | 290            | 1       | 1        | 1        | 1       | 0       | 0       | 1        | 0        | 1       | 1       | 1       | 0       | 1        | 1       | 1        | 1        | 0       | 0        | 1       | 1       |
| Capnocytophaga       | 1              | 50             | 0       | 1        | 1        | 1       | 0       | 0       | 0        | 0        | 0       | 0       | 0       | 0       | 0        | 0       | 0        | 0        | 0       | 0        | 1       | 1       |
| Carbophilus          | 1              | 2              | 0       | 0        | 0        | 0       | 0       | 0       | 0        | 0        | 0       | 0       | 0       | 0       | 0        | 0       | 0        | 0        | 0       | 0        | 0       | 0       |
| Carboxydibrachium    | 1              | 14             | 0       | 0        | 1        | 1       | 0       | 0       | 0        | 0        | 0       | 0       | 0       | 0       | 0        | 0       | 0        | 0        | 0       | 0        | 0       | 0       |
| Carboxydotherrmus    | 2              | 68             | 0       | 1        | 0        | 1       | 0       | 0       | 0        | 0        | 0       | 0       | 0       | 0       | 0        | 0       | 0        | 0        | 0       | 0        | 0       | 0       |
| Carica               | 1              | 2              | 0       | 0        | 0        | 0       | 0       | 0       | 0        | 0        | 0       | 0       | 0       | 0       | 0        | 0       | 0        | 0        | 0       | 0        | 0       | 0       |
| Carnobacterium       | 2              | 71             | 1       | 1        | 1        | 1       | 0       | 0       | 0        | 0        | 0       | 0       | 0       | 1       | 0        | 0       | 0        | 0        | 0       | 0        | 0       | 0       |
| Catenibacterium      | 1              | 2              | 0       | 0        | 0        | 0       | 0       | 0       | 0        | 0        | 0       | 0       | 0       | 0       | 0        | 0       | 0        | 0        | 0       | 0        | 0       | 0       |
| Catenovulum          | 1              | 2              | 0       | 0        | 0        | 0       | 0       | 0       | 0        | 0        | 0       | 0       | 0       | 0       | 0        | 0       | 0        | 0        | 0       | 0        | 0       | 0       |
| Catenulispora        | 3              | 159            | 1       | 1        | 1        | 1       | 1       | 0       | 1        | 0        | 1       | 0       | 0       | 0       | 0        | 0       | 1        | 1        | 1       | 0        | 0       | 1       |
| Caulobacter          | 3              | 168            | 0       | 0        | 0        | 1       | 0       | 0       | 1        | 0        | 1       | 0       | 1       | 0       | 1        | 1       | 1        | 0        | 1       | 0        | 1       | 0       |
| Cedecea              | 1              | 45             | 0       | 0        | 1        | 1       | 1       | 0       | 0        | 0        | 0       | 0       | 1       | 0       | 0        | 0       | 0        | 0        | 1       | 0        | 0       | 0       |
| Cellulomonas         | 2              | 96             | 0       | 1        | 1        | 1       | 0       | 0       | 0        | 0        | 0       | 0       | 1       | 0       | 0        | 0       | 0        | 0        | 1       | 0        | 1       | 0       |
| Cellulophaga         | 2              | 105            | 0       | 1        | 1        | 1       | 0       | 0       | 0        | 0        | 0       | 0       | 0       | 1       | 1        | 1       | 0        | 0        | 0       | 0        | 1       | 0       |
| Cellulosilyticum     | 1              | 14             | 0       | 0        | 0        | 0       | 0       | 0       | 0        | 0        | 0       | 0       | 0       | 0       | 0        | 0       | 0        | 0        | 0       | 0        | 0       | 0       |
| Cellvibrio           | 2              | 85             | 1       | 0        | 0        | 1       | 0       | 0       | 0        | 0        | 0       | 0       | 1       | 0       | 1        | 1       | 1        | 0        | 0       | 0        | 1       | 0       |
| Cenarchaeum          | 1              | 7              | 0       | 0        | 0        | 0       | 0       | 0       | 0        | 0        | 0       | 0       | 0       | 0       | 0        | 0       | 0        | 0        | 0       | 0        | 0       | 0       |
| Chamaesiphon         | 1              | 13             | 0       | 0        | 0        | 0       | 0       | 0       | 0        | 0        | 0       | 0       | 0       | 0       | 0        | 0       | 0        | 0        | 0       | 0        | 0       | 0       |
| Chelativorans        | 3              | 136            | 0       | 0        | 0        | 1       | 0       | 0       | 1        | 0        | 1       | 0       | 1       | 1       | 1        | 1       | 1        | 0        | 1       | 0        | 1       | 0       |

| Genus                  | Cluster Number | Protein Counts | 2.6.1.- | 2.7.1.21 | 2.7.1.48 | 2.7.4.- | 2.8.3.- | 2.8.3.1 | 2.8.3.12 | 2.8.3.15 | 2.8.3.6 | 2.8.3.8 | 3.1.1.- | 3.1.1.1 | 3.1.1.17 | 3.1.1.2 | 3.1.1.24 | 3.1.1.45 | 3.1.2.- | 3.1.2.23 | 3.1.3.1 | 3.1.3.2 |
|------------------------|----------------|----------------|---------|----------|----------|---------|---------|---------|----------|----------|---------|---------|---------|---------|----------|---------|----------|----------|---------|----------|---------|---------|
| Chelatococcus          | 1              | 2              | 0       | 0        | 0        | 0       | 0       | 0       | 0        | 0        | 0       | 0       | 0       | 0       | 0        | 0       | 0        | 0        | 0       | 0        | 0       | 0       |
| Chitinophaga           | 2              | 98             | 0       | 1        | 0        | 1       | 0       | 0       | 0        | 0        | 0       | 0       | 1       | 0       | 1        | 0       | 0        | 0        | 0       | 0        | 1       | 1       |
| Chlamydia              | 1              | 36             | 0       | 0        | 1        | 1       | 0       | 0       | 0        | 0        | 0       | 0       | 0       | 0       | 0        | 0       | 0        | 0        | 0       | 0        | 0       | 0       |
| Chlamydomonas          | 1              | 3              | 0       | 0        | 0        | 0       | 0       | 0       | 0        | 0        | 0       | 0       | 1       | 0       | 0        | 0       | 0        | 0        | 0       | 0        | 0       | 0       |
| Chlamydomphila         | 1              | 31             | 0       | 0        | 1        | 1       | 0       | 0       | 0        | 0        | 0       | 0       | 0       | 0       | 0        | 0       | 0        | 0        | 0       | 0        | 0       | 0       |
| Chlorobaculum          | 2              | 61             | 0       | 0        | 1        | 1       | 0       | 0       | 0        | 0        | 0       | 0       | 1       | 1       | 0        | 0       | 1        | 0        | 0       | 0        | 1       | 0       |
| Chlorobium             | 2              | 89             | 1       | 0        | 1        | 1       | 0       | 0       | 0        | 0        | 0       | 0       | 1       | 1       | 0        | 0       | 1        | 0        | 0       | 0        | 1       | 1       |
| Chlorobium/Pelodictyon | 1              | 2              | 0       | 0        | 0        | 0       | 0       | 0       | 0        | 0        | 0       | 0       | 0       | 0       | 0        | 0       | 0        | 0        | 0       | 0        | 0       | 0       |
| Chloroflexus           | 2              | 105            | 1       | 1        | 1        | 1       | 0       | 0       | 0        | 0        | 0       | 0       | 1       | 1       | 0        | 0       | 1        | 0        | 0       | 0        | 1       | 0       |
| Chlorogloeopsis        | 1              | 9              | 0       | 0        | 0        | 1       | 0       | 0       | 0        | 0        | 0       | 0       | 0       | 0       | 0        | 0       | 0        | 0        | 0       | 0        | 0       | 0       |
| Chloroherpeton         | 2              | 59             | 0       | 1        | 0        | 1       | 0       | 0       | 0        | 0        | 0       | 0       | 1       | 0       | 0        | 1       | 1        | 0        | 0       | 1        | 1       | 0       |
| Chromobacterium        | 2              | 117            | 1       | 1        | 1        | 1       | 0       | 0       | 0        | 0        | 0       | 0       | 1       | 0       | 0        | 1       | 0        | 0        | 0       | 0        | 1       | 0       |
| Chromohalobacter       | 2              | 145            | 0       | 0        | 0        | 1       | 0       | 0       | 0        | 0        | 1       | 0       | 1       | 0       | 1        | 1       | 1        | 0        | 1       | 0        | 0       | 0       |
| Chroococciopsis        | 1              | 24             | 0       | 0        | 0        | 0       | 0       | 0       | 0        | 0        | 0       | 0       | 0       | 0       | 0        | 0       | 0        | 0        | 0       | 0        | 0       | 0       |
| Chryseobacterium       | 2              | 104            | 0       | 0        | 0        | 0       | 0       | 0       | 0        | 0        | 0       | 0       | 1       | 0       | 0        | 1       | 1        | 0        | 0       | 0        | 1       | 0       |
| Citricella             | 1              | 13             | 0       | 0        | 0        | 0       | 0       | 0       | 0        | 0        | 0       | 0       | 0       | 0       | 0        | 0       | 0        | 0        | 0       | 0        | 0       | 0       |
| Citrobacter            | 2              | 190            | 0       | 1        | 1        | 1       | 1       | 0       | 0        | 0        | 1       | 1       | 1       | 0       | 0        | 1       | 1        | 1        | 1       | 0        | 1       | 1       |
| Clavibacter            | 2              | 83             | 0       | 1        | 1        | 1       | 0       | 0       | 0        | 0        | 0       | 0       | 1       | 1       | 1        | 0       | 1        | 1        | 1       | 0        | 0       | 0       |
| Clonorchis             | 1              | 1              | 0       | 0        | 0        | 0       | 0       | 0       | 0        | 0        | 0       | 0       | 0       | 0       | 0        | 0       | 0        | 0        | 0       | 0        | 0       | 0       |
| Clostridiales          | 2              | 77             | 0       | 1        | 1        | 1       | 0       | 0       | 0        | 0        | 0       | 1       | 1       | 0       | 0        | 0       | 0        | 0        | 0       | 0        | 0       | 0       |
| Clostridium            | 2              | 191            | 1       | 1        | 1        | 1       | 1       | 0       | 0        | 0        | 1       | 1       | 1       | 0       | 0        | 1       | 1        | 0        | 0       | 0        | 1       | 1       |
| Cohnella               | 1              | 2              | 0       | 0        | 0        | 1       | 0       | 0       | 0        | 0        | 0       | 0       | 0       | 0       | 0        | 0       | 0        | 0        | 0       | 0        | 0       | 0       |
| Coleofasciculus        | 1              | 4              | 0       | 0        | 0        | 0       | 0       | 0       | 0        | 0        | 0       | 0       | 0       | 0       | 0        | 0       | 0        | 0        | 0       | 0        | 0       | 0       |
| Collimonas             | 1              | 35             | 0       | 0        | 0        | 1       | 0       | 0       | 0        | 0        | 0       | 0       | 0       | 0       | 0        | 0       | 0        | 0        | 0       | 0        | 0       | 0       |
| Colwellia              | 2              | 130            | 0       | 1        | 1        | 1       | 0       | 0       | 0        | 0        | 1       | 0       | 1       | 0       | 0        | 1       | 0        | 0        | 1       | 0        | 1       | 1       |
| Comamonas              | 2              | 196            | 0       | 0        | 0        | 1       | 0       | 0       | 1        | 0        | 1       | 0       | 1       | 1       | 0        | 1       | 0        | 0        | 0       | 0        | 1       | 0       |
| Conexibacter           | 3              | 117            | 0       | 0        | 0        | 1       | 1       | 0       | 1        | 0        | 0       | 0       | 1       | 1       | 1        | 0       | 1        | 0        | 0       | 0        | 1       | 0       |
| Coprobacillus          | 1              | 2              | 0       | 0        | 0        | 0       | 0       | 0       | 0        | 0        | 0       | 0       | 0       | 0       | 0        | 0       | 0        | 0        | 0       | 0        | 0       | 0       |
| Coprococcus            | 2              | 76             | 0       | 0        | 1        | 1       | 0       | 0       | 0        | 0        | 0       | 1       | 1       | 0       | 0        | 0       | 1        | 0        | 0       | 0        | 0       | 0       |
| Coprothermobacter      | 2              | 45             | 0       | 1        | 1        | 1       | 0       | 0       | 0        | 0        | 0       | 0       | 0       | 0       | 0        | 0       | 0        | 0        | 0       | 0        | 0       | 0       |
| Coralimargarita        | 2              | 68             | 0       | 0        | 0        | 1       | 0       | 0       | 0        | 0        | 0       | 0       | 0       | 0       | 1        | 1       | 0        | 0        | 0       | 0        | 1       | 0       |
| Corallococcus          | 1              | 29             | 0       | 0        | 1        | 0       | 0       | 0       | 0        | 0        | 0       | 0       | 0       | 0       | 0        | 0       | 0        | 0        | 0       | 0        | 0       | 0       |
| Coriobacterium         | 2              | 36             | 0       | 0        | 0        | 1       | 0       | 0       | 0        | 0        | 0       | 0       | 1       | 0       | 0        | 0       | 0        | 0        | 0       | 0        | 0       | 0       |
| Corynebacterineae      | 1              | 5              | 0       | 0        | 0        | 0       | 0       | 0       | 0        | 0        | 0       | 0       | 0       | 0       | 0        | 0       | 0        | 0        | 0       | 0        | 0       | 0       |
| Corynebacterium        | 2              | 175            | 0       | 0        | 0        | 1       | 0       | 0       | 0        | 0        | 1       | 0       | 1       | 1       | 0        | 0       | 1        | 0        | 1       | 1        | 1       | 0       |
| Coxiella               | 2              | 54             | 1       | 1        | 1        | 1       | 0       | 0       | 0        | 0        | 0       | 0       | 1       | 0       | 0        | 0       | 0        | 0        | 0       | 0        | 0       | 0       |
| Crinalium              | 1              | 21             | 0       | 0        | 0        | 0       | 0       | 0       | 0        | 0        | 0       | 0       | 0       | 0       | 0        | 0       | 0        | 0        | 0       | 0        | 0       | 0       |
| Croceibacter           | 2              | 80             | 0       | 1        | 1        | 1       | 0       | 0       | 0        | 0        | 0       | 0       | 0       | 1       | 0        | 0       | 0        | 0        | 0       | 0        | 1       | 0       |
| Crocospaera            | 1              | 6              | 0       | 0        | 0        | 0       | 0       | 0       | 0        | 0        | 0       | 0       | 0       | 0       | 0        | 0       | 0        | 0        | 0       | 0        | 0       | 0       |
| Cronobacter            | 2              | 120            | 1       | 1        | 1        | 1       | 0       | 0       | 0        | 0        | 0       | 0       | 1       | 0       | 0        | 1       | 0        | 1        | 1       | 0        | 0       | 1       |
| Cryptobacterium        | 2              | 39             | 1       | 0        | 0        | 1       | 0       | 0       | 0        | 0        | 0       | 0       | 0       | 0       | 0        | 0       | 1        | 0        | 0       | 0        | 0       | 0       |
| Cucumis                | 1              | 9              | 0       | 0        | 1        | 0       | 0       | 0       | 0        | 0        | 0       | 0       | 0       | 0       | 0        | 0       | 0        | 0        | 0       | 0        | 0       | 0       |
| Cupriavidus            | 3              | 317            | 1       | 0        | 0        | 1       | 1       | 0       | 1        | 0        | 1       | 1       | 1       | 0       | 1        | 1       | 1        | 0        | 0       | 1        | 1       | 1       |
| Curtobacterium         | 1              | 5              | 0       | 0        | 0        | 0       | 0       | 0       | 0        | 0        | 0       | 0       | 0       | 0       | 0        | 0       | 0        | 0        | 0       | 0        | 0       | 0       |
| Curvibacter            | 1              | 27             | 0       | 0        | 0        | 0       | 0       | 0       | 0        | 0        | 0       | 0       | 0       | 0       | 0        | 0       | 0        | 0        | 0       | 0        | 0       | 0       |
| Cyanobacterium         | 1              | 9              | 0       | 0        | 0        | 0       | 0       | 0       | 0        | 0        | 0       | 0       | 0       | 0       | 0        | 0       | 0        | 0        | 0       | 0        | 0       | 0       |
| Cyanobium              | 1              | 10             | 0       | 0        | 0        | 0       | 0       | 0       | 0        | 0        | 0       | 0       | 0       | 0       | 0        | 0       | 0        | 0        | 0       | 0        | 0       | 0       |
| Cyanothece             | 1              | 34             | 0       | 0        | 0        | 1       | 0       | 0       | 0        | 0        | 0       | 0       | 0       | 0       | 0        | 0       | 0        | 0        | 0       | 0        | 0       | 0       |
| Cyclobacterium         | 1              | 19             | 0       | 0        | 0        | 0       | 0       | 0       | 0        | 0        | 0       | 0       | 0       | 0       | 0        | 0       | 0        | 0        | 0       | 0        | 0       | 0       |
| Cycloclasticus         | 1              | 21             | 0       | 0        | 0        | 0       | 0       | 0       | 0        | 0        | 0       | 0       | 0       | 0       | 0        | 0       | 0        | 0        | 0       | 0        | 0       | 0       |
| Cylindrospermopsis     | 1              | 4              | 0       | 0        | 0        | 1       | 0       | 0       | 0        | 0        | 0       | 0       | 0       | 0       | 0        | 0       | 0        | 0        | 0       | 0        | 0       | 0       |
| Cylindrospermum        | 1              | 30             | 0       | 0        | 1        | 1       | 0       | 0       | 0        | 0        | 0       | 0       | 0       | 0       | 0        | 0       | 0        | 0        | 0       | 0        | 0       | 0       |



| Genus              | Cluster Number | Protein Counts | 2.6.1.- | 2.7.1.21 | 2.7.1.48 | 2.7.4.- | 2.8.3.- | 2.8.3.1 | 2.8.3.12 | 2.8.3.15 | 2.8.3.6 | 2.8.3.8 | 3.1.1.- | 3.1.1.1 | 3.1.1.17 | 3.1.1.2 | 3.1.1.24 | 3.1.1.45 | 3.1.2.- | 3.1.2.23 | 3.1.3.1 | 3.1.3.2 |
|--------------------|----------------|----------------|---------|----------|----------|---------|---------|---------|----------|----------|---------|---------|---------|---------|----------|---------|----------|----------|---------|----------|---------|---------|
| Cytophaga          | 2              | 69             | 1       | 0        | 1        | 1       | 0       | 0       | 0        | 0        | 0       | 0       | 1       | 0       | 1        | 0       | 1        | 0        | 0       | 0        | 1       | 0       |
| Dactylococcopsis   | 1              | 8              | 0       | 0        | 0        | 0       | 0       | 0       | 0        | 0        | 0       | 0       | 0       | 0       | 0        | 0       | 0        | 0        | 0       | 0        | 0       | 0       |
| Dechloromonas      | 1              | 40             | 0       | 0        | 0        | 0       | 0       | 0       | 0        | 0        | 0       | 0       | 0       | 0       | 0        | 0       | 0        | 0        | 0       | 0        | 0       | 0       |
| Dechlorosoma       | 1              | 19             | 0       | 0        | 0        | 0       | 0       | 0       | 0        | 0        | 0       | 0       | 0       | 0       | 0        | 0       | 0        | 0        | 0       | 0        | 0       | 0       |
| Deferribacter      | 2              | 73             | 1       | 0        | 0        | 1       | 0       | 0       | 0        | 0        | 0       | 1       | 1       | 1       | 0        | 0       | 0        | 0        | 0       | 0        | 1       | 0       |
| Dehalobacter       | 1              | 9              | 0       | 0        | 0        | 0       | 0       | 0       | 0        | 0        | 0       | 0       | 0       | 0       | 0        | 0       | 0        | 0        | 0       | 0        | 0       | 0       |
| Dehalococcoides    | 2              | 41             | 0       | 0        | 0        | 1       | 0       | 0       | 0        | 0        | 0       | 0       | 1       | 0       | 0        | 0       | 1        | 0        | 0       | 0        | 0       | 0       |
| Dehalogenimonas    | 1              | 37             | 0       | 0        | 0        | 1       | 0       | 0       | 0        | 0        | 0       | 0       | 0       | 0       | 0        | 0       | 0        | 0        | 0       | 0        | 1       | 0       |
| Deinococcus        | 2              | 140            | 1       | 1        | 1        | 1       | 0       | 0       | 0        | 0        | 1       | 1       | 0       | 1       | 1        | 0       | 1        | 0        | 0       | 1        | 1       | 0       |
| Delftia            | 3              | 177            | 0       | 0        | 0        | 1       | 0       | 0       | 0        | 0        | 1       | 0       | 1       | 1       | 1        | 1       | 1        | 0        | 0       | 1        | 1       | 0       |
| Denitrovibrio      | 2              | 67             | 0       | 0        | 0        | 1       | 0       | 0       | 0        | 0        | 0       | 0       | 1       | 1       | 0        | 0       | 0        | 0        | 0       | 0        | 1       | 0       |
| Desulfarculus      | 2              | 92             | 1       | 0        | 0        | 1       | 0       | 0       | 0        | 0        | 0       | 0       | 1       | 0       | 0        | 0       | 0        | 0        | 0       | 0        | 1       | 0       |
| Desulfatibacillum  | 3              | 84             | 0       | 0        | 0        | 1       | 0       | 0       | 1        | 0        | 1       | 0       | 0       | 0       | 0        | 0       | 1        | 0        | 0       | 0        | 0       | 0       |
| Desulfitobacterium | 2              | 102            | 1       | 0        | 1        | 1       | 1       | 0       | 1        | 0        | 1       | 0       | 0       | 0       | 0        | 0       | 1        | 0        | 0       | 0        | 1       | 0       |
| Desulfobacca       | 2              | 65             | 1       | 0        | 0        | 1       | 0       | 0       | 0        | 0        | 0       | 0       | 1       | 0       | 0        | 0       | 0        | 0        | 0       | 0        | 1       | 0       |
| Desulfobacterium   | 2              | 113            | 0       | 0        | 0        | 1       | 0       | 0       | 1        | 0        | 0       | 0       | 1       | 0       | 0        | 1       | 1        | 0        | 1       | 0        | 1       | 0       |
| Desulfobacula      | 1              | 21             | 0       | 0        | 0        | 0       | 0       | 0       | 0        | 0        | 0       | 0       | 0       | 0       | 0        | 0       | 0        | 0        | 0       | 0        | 0       | 0       |
| Desulfobulbus      | 2              | 88             | 0       | 0        | 0        | 1       | 0       | 0       | 1        | 0        | 1       | 0       | 1       | 0       | 0        | 1       | 1        | 0        | 0       | 0        | 1       | 0       |
| Desulfocapsa       | 1              | 9              | 0       | 0        | 0        | 0       | 0       | 0       | 0        | 0        | 0       | 0       | 0       | 0       | 0        | 0       | 0        | 0        | 0       | 0        | 0       | 0       |
| Desulfococcus      | 2              | 80             | 0       | 0        | 0        | 1       | 0       | 0       | 0        | 0        | 0       | 0       | 1       | 0       | 0        | 0       | 1        | 0        | 0       | 0        | 0       | 0       |
| Desulfohalobium    | 2              | 52             | 0       | 0        | 0        | 1       | 0       | 0       | 0        | 0        | 0       | 0       | 1       | 0       | 0        | 0       | 1        | 0        | 0       | 0        | 1       | 0       |
| Desulfomicrobium   | 2              | 65             | 0       | 0        | 0        | 1       | 0       | 0       | 0        | 0        | 0       | 0       | 1       | 0       | 0        | 1       | 0        | 0        | 0       | 0        | 1       | 0       |
| Desulfomonile      | 1              | 25             | 0       | 0        | 0        | 0       | 0       | 0       | 0        | 0        | 0       | 0       | 0       | 0       | 0        | 0       | 0        | 0        | 0       | 0        | 0       | 0       |
| Desulforhabdus     | 1              | 2              | 0       | 0        | 0        | 0       | 0       | 0       | 0        | 0        | 0       | 0       | 0       | 0       | 0        | 0       | 0        | 0        | 0       | 0        | 0       | 0       |
| Desulfosporosinus  | 1              | 30             | 0       | 0        | 0        | 0       | 0       | 0       | 0        | 0        | 0       | 0       | 0       | 0       | 0        | 0       | 0        | 0        | 0       | 0        | 0       | 0       |
| Desulfotalea       | 2              | 66             | 0       | 0        | 0        | 1       | 0       | 0       | 0        | 0        | 0       | 0       | 0       | 0       | 0        | 0       | 0        | 0        | 0       | 0        | 0       | 0       |
| Desulfotomaculum   | 2              | 98             | 0       | 0        | 1        | 1       | 1       | 0       | 1        | 0        | 1       | 0       | 0       | 1       | 0        | 0       | 0        | 0        | 0       | 0        | 0       | 0       |
| Desulfovibrio      | 2              | 144            | 1       | 0        | 1        | 1       | 0       | 0       | 1        | 0        | 0       | 0       | 1       | 0       | 0        | 1       | 1        | 0        | 1       | 0        | 1       | 1       |
| Desulfurispirillum | 2              | 78             | 0       | 0        | 0        | 1       | 0       | 0       | 0        | 0        | 0       | 0       | 1       | 0       | 0        | 1       | 0        | 0        | 0       | 0        | 1       | 0       |
| Desulfurivibrio    | 2              | 71             | 1       | 0        | 0        | 1       | 0       | 0       | 0        | 0        | 0       | 0       | 1       | 0       | 0        | 0       | 0        | 0        | 0       | 0        | 0       | 0       |
| Desulfurobacterium | 2              | 53             | 0       | 0        | 0        | 1       | 0       | 0       | 0        | 0        | 0       | 0       | 0       | 0       | 0        | 0       | 0        | 0        | 0       | 0        | 0       | 0       |
| Desulfurococcus    | 1              | 11             | 0       | 0        | 0        | 0       | 0       | 0       | 0        | 0        | 0       | 0       | 0       | 0       | 0        | 0       | 0        | 0        | 0       | 0        | 0       | 0       |
| Diaphorobacter     | 1              | 16             | 0       | 0        | 0        | 0       | 0       | 0       | 0        | 0        | 0       | 0       | 0       | 0       | 0        | 0       | 0        | 0        | 0       | 0        | 0       | 0       |
| Dichelobacter      | 2              | 45             | 0       | 0        | 0        | 1       | 0       | 0       | 0        | 0        | 0       | 0       | 0       | 0       | 0        | 0       | 1        | 0        | 0       | 0        | 1       | 0       |
| Dickeya            | 2              | 155            | 1       | 1        | 1        | 1       | 0       | 0       | 0        | 0        | 0       | 1       | 1       | 0       | 0        | 1       | 1        | 1        | 1       | 0        | 1       | 0       |
| Dictyoglomus       | 2              | 62             | 0       | 1        | 1        | 1       | 0       | 0       | 0        | 0        | 0       | 0       | 1       | 0       | 0        | 0       | 0        | 0        | 0       | 0        | 1       | 0       |
| Dinoroseobacter    | 3              | 148            | 0       | 1        | 0        | 1       | 0       | 0       | 0        | 0        | 0       | 1       | 1       | 0       | 0        | 1       | 1        | 0        | 1       | 0        | 1       | 0       |
| Dokdonia           | 1              | 3              | 0       | 0        | 0        | 0       | 0       | 0       | 0        | 0        | 0       | 0       | 0       | 0       | 0        | 0       | 0        | 0        | 0       | 0        | 0       | 0       |
| Dorea              | 1              | 7              | 0       | 0        | 0        | 0       | 0       | 0       | 0        | 0        | 0       | 0       | 0       | 0       | 0        | 0       | 0        | 0        | 0       | 0        | 0       | 0       |
| Dyadobacter        | 2              | 83             | 1       | 1        | 1        | 1       | 0       | 0       | 0        | 0        | 0       | 0       | 1       | 0       | 1        | 1       | 1        | 0        | 0       | 0        | 1       | 1       |
| Echinicola         | 1              | 20             | 0       | 0        | 0        | 0       | 0       | 0       | 0        | 0        | 0       | 0       | 0       | 0       | 0        | 0       | 0        | 0        | 0       | 0        | 0       | 0       |
| Edwardsiella       | 2              | 126            | 1       | 1        | 1        | 1       | 1       | 0       | 0        | 0        | 0       | 1       | 1       | 0       | 0        | 1       | 1        | 0        | 1       | 0        | 1       | 1       |
| Eggerthella        | 1              | 51             | 1       | 0        | 0        | 1       | 1       | 0       | 0        | 0        | 0       | 0       | 1       | 0       | 0        | 0       | 0        | 0        | 0       | 0        | 0       | 0       |
| Ehrlichia          | 2              | 37             | 0       | 0        | 0        | 1       | 0       | 0       | 0        | 0        | 0       | 0       | 1       | 0       | 0        | 0       | 0        | 0        | 0       | 0        | 0       | 0       |
| Eikenella          | 1              | 4              | 0       | 0        | 0        | 0       | 0       | 0       | 0        | 0        | 0       | 0       | 0       | 0       | 0        | 0       | 0        | 0        | 0       | 0        | 0       | 0       |
| Elusimicrobium     | 2              | 44             | 1       | 1        | 0        | 1       | 0       | 0       | 0        | 0        | 0       | 0       | 1       | 0       | 0        | 0       | 0        | 0        | 0       | 0        | 1       | 0       |
| Emticicia          | 1              | 21             | 0       | 0        | 0        | 0       | 0       | 0       | 0        | 0        | 0       | 0       | 0       | 0       | 0        | 0       | 0        | 0        | 0       | 0        | 0       | 0       |
| Enhydrobacter      | 1              | 1              | 0       | 0        | 0        | 0       | 0       | 0       | 0        | 0        | 0       | 0       | 0       | 0       | 0        | 0       | 0        | 0        | 0       | 0        | 0       | 0       |
| Ensifer            | 1              | 2              | 0       | 0        | 0        | 0       | 0       | 0       | 0        | 0        | 0       | 0       | 0       | 0       | 0        | 0       | 0        | 0        | 0       | 0        | 0       | 0       |
| Enterobacter       | 2              | 202            | 1       | 1        | 1        | 1       | 0       | 0       | 0        | 0        | 1       | 0       | 1       | 0       | 1        | 1       | 1        | 1        | 1       | 0        | 1       | 1       |
| Enterobacteriaceae | 2              | 211            | 1       | 1        | 1        | 1       | 1       | 0       | 0        | 0        | 1       | 1       | 1       | 0       | 0        | 1       | 0        | 1        | 1       | 0        | 1       | 1       |
| Enterococcus       | 1              | 187            | 1       | 1        | 1        | 1       | 0       | 0       | 0        | 0        | 1       | 0       | 1       | 1       | 1        | 1       | 1        | 1        | 1       | 0        | 0       | 0       |

| Genus               | Cluster Number | Protein Counts | 2.6.1.- | 2.7.1.21 | 2.7.1.48 | 2.7.4.- | 2.8.3.- | 2.8.3.1 | 2.8.3.12 | 2.8.3.15 | 2.8.3.6 | 2.8.3.8 | 3.1.1.- | 3.1.1.1 | 3.1.1.17 | 3.1.1.2 | 3.1.1.24 | 3.1.1.45 | 3.1.2.- | 3.1.2.23 | 3.1.3.1 | 3.1.3.2 |
|---------------------|----------------|----------------|---------|----------|----------|---------|---------|---------|----------|----------|---------|---------|---------|---------|----------|---------|----------|----------|---------|----------|---------|---------|
| Enterovibrio        | 1              | 15             | 0       | 0        | 0        | 1       | 0       | 0       | 0        | 0        | 0       | 0       | 0       | 0       | 0        | 0       | 0        | 0        | 0       | 0        | 0       | 0       |
| Erwinia             | 2              | 151            | 1       | 1        | 1        | 1       | 0       | 1       | 0        | 0        | 0       | 0       | 1       | 0       | 1        | 1       | 1        | 1        | 1       | 0        | 1       | 1       |
| Erysipelothrix      | 1              | 9              | 0       | 0        | 0        | 0       | 0       | 0       | 0        | 0        | 0       | 0       | 0       | 0       | 0        | 0       | 0        | 0        | 0       | 0        | 0       | 0       |
| Erysipelotrichaceae | 1              | 4              | 0       | 0        | 0        | 0       | 0       | 0       | 0        | 0        | 0       | 0       | 0       | 0       | 0        | 0       | 0        | 0        | 0       | 0        | 0       | 0       |
| Erythrobacter       | 2              | 80             | 0       | 1        | 0        | 1       | 0       | 0       | 0        | 0        | 0       | 0       | 1       | 0       | 0        | 1       | 1        | 0        | 1       | 0        | 1       | 0       |
| Escherichia         | 2              | 242            | 1       | 1        | 1        | 1       | 1       | 1       | 0        | 0        | 1       | 1       | 1       | 0       | 0        | 1       | 1        | 1        | 1       | 0        | 1       | 1       |
| Ethanoligenens      | 2              | 69             | 0       | 0        | 1        | 1       | 0       | 0       | 0        | 0        | 0       | 0       | 0       | 0       | 0        | 0       | 0        | 0        | 0       | 0        | 0       | 0       |
| Eubacteriaceae      | 1              | 2              | 0       | 0        | 0        | 0       | 0       | 0       | 0        | 0        | 0       | 0       | 0       | 0       | 0        | 0       | 0        | 0        | 0       | 0        | 0       | 0       |
| Eubacterium         | 2              | 103            | 1       | 0        | 1        | 1       | 0       | 0       | 0        | 0        | 0       | 1       | 0       | 0       | 1        | 0       | 0        | 0        | 0       | 0        | 0       | 0       |
| Eudoraea            | 1              | 4              | 0       | 0        | 0        | 0       | 0       | 0       | 0        | 0        | 0       | 0       | 0       | 0       | 0        | 0       | 0        | 0        | 0       | 0        | 0       | 0       |
| Euryarchaeota       | 1              | 1              | 0       | 0        | 0        | 0       | 0       | 0       | 0        | 0        | 0       | 0       | 0       | 0       | 0        | 0       | 0        | 0        | 0       | 0        | 0       | 0       |
| Exiguobacterium     | 2              | 93             | 1       | 1        | 1        | 1       | 0       | 0       | 0        | 0        | 0       | 0       | 0       | 1       | 1        | 0       | 0        | 0        | 0       | 0        | 1       | 0       |
| Faecalibacterium    | 1              | 12             | 0       | 0        | 0        | 0       | 0       | 0       | 0        | 0        | 0       | 0       | 0       | 0       | 0        | 0       | 0        | 0        | 0       | 0        | 0       | 0       |
| Ferrimonas          | 2              | 115            | 0       | 1        | 1        | 1       | 0       | 0       | 0        | 0        | 0       | 0       | 1       | 0       | 0        | 1       | 0        | 0        | 1       | 0        | 1       | 0       |
| Ferroglobus         | 1              | 14             | 0       | 0        | 0        | 0       | 0       | 0       | 0        | 0        | 0       | 0       | 0       | 0       | 0        | 0       | 0        | 0        | 0       | 0        | 0       | 0       |
| Ferroplasma         | 1              | 11             | 0       | 0        | 0        | 0       | 0       | 0       | 0        | 0        | 0       | 0       | 0       | 0       | 0        | 0       | 0        | 0        | 0       | 0        | 0       | 0       |
| Fervidicoccus       | 1              | 7              | 0       | 0        | 0        | 0       | 0       | 0       | 0        | 0        | 0       | 0       | 0       | 0       | 0        | 0       | 0        | 0        | 0       | 0        | 0       | 0       |
| Fervidobacterium    | 2              | 54             | 0       | 1        | 1        | 1       | 0       | 0       | 0        | 0        | 0       | 0       | 0       | 1       | 0        | 0       | 0        | 0        | 0       | 0        | 1       | 0       |
| Fibrella            | 1              | 17             | 0       | 0        | 0        | 0       | 0       | 0       | 0        | 0        | 0       | 0       | 0       | 0       | 0        | 0       | 0        | 0        | 0       | 0        | 0       | 0       |
| Fibrobacter         | 2              | 52             | 0       | 0        | 0        | 1       | 0       | 0       | 0        | 0        | 0       | 0       | 0       | 0       | 0        | 0       | 0        | 0        | 0       | 0        | 1       | 0       |
| Filifactor          | 1              | 9              | 0       | 0        | 0        | 0       | 0       | 0       | 0        | 0        | 0       | 0       | 0       | 0       | 0        | 0       | 0        | 0        | 0       | 0        | 0       | 0       |
| Finegoldia          | 2              | 55             | 1       | 1        | 1        | 1       | 0       | 0       | 0        | 0        | 0       | 0       | 0       | 0       | 0        | 0       | 0        | 0        | 0       | 0        | 0       | 0       |
| Firmicutes          | 1              | 15             | 0       | 0        | 0        | 0       | 0       | 0       | 0        | 0        | 0       | 0       | 0       | 0       | 0        | 0       | 0        | 0        | 0       | 0        | 0       | 0       |
| Fischerella         | 1              | 15             | 0       | 0        | 0        | 1       | 0       | 0       | 0        | 0        | 0       | 0       | 0       | 0       | 0        | 0       | 0        | 0        | 0       | 0        | 0       | 0       |
| Flavobacteria       | 1              | 7              | 0       | 0        | 0        | 0       | 0       | 0       | 0        | 0        | 0       | 0       | 0       | 0       | 0        | 0       | 0        | 0        | 0       | 0        | 0       | 0       |
| Flavobacteriaceae   | 2              | 69             | 1       | 1        | 1        | 1       | 0       | 0       | 0        | 0        | 0       | 0       | 0       | 0       | 0        | 0       | 0        | 0        | 0       | 0        | 1       | 0       |
| Flavobacteriales    | 1              | 3              | 0       | 0        | 0        | 0       | 0       | 0       | 0        | 0        | 0       | 0       | 0       | 0       | 0        | 0       | 0        | 0        | 0       | 0        | 0       | 0       |
| Flavobacterium      | 2              | 103            | 1       | 1        | 1        | 1       | 0       | 0       | 0        | 0        | 0       | 0       | 0       | 1       | 0        | 0       | 1        | 0        | 0       | 0        | 1       | 1       |
| Flexibacter         | 1              | 17             | 0       | 0        | 0        | 0       | 0       | 0       | 0        | 0        | 0       | 0       | 0       | 0       | 0        | 0       | 0        | 0        | 0       | 0        | 0       | 0       |
| Flexistipes         | 1              | 11             | 0       | 0        | 0        | 0       | 0       | 0       | 0        | 0        | 0       | 0       | 0       | 0       | 0        | 0       | 0        | 0        | 0       | 0        | 0       | 0       |
| Fluoribacter        | 1              | 6              | 0       | 0        | 0        | 1       | 0       | 0       | 0        | 0        | 0       | 0       | 0       | 0       | 0        | 0       | 0        | 0        | 0       | 0        | 0       | 0       |
| Fluviicola          | 2              | 69             | 1       | 1        | 0        | 1       | 0       | 0       | 0        | 0        | 0       | 0       | 0       | 0       | 0        | 0       | 0        | 0        | 0       | 0        | 1       | 0       |
| Formosa             | 1              | 2              | 0       | 0        | 0        | 0       | 0       | 0       | 0        | 0        | 0       | 0       | 0       | 0       | 0        | 0       | 0        | 0        | 0       | 0        | 0       | 0       |
| Francisella         | 2              | 88             | 1       | 1        | 1        | 1       | 0       | 0       | 0        | 0        | 0       | 0       | 0       | 1       | 0        | 0       | 0        | 0        | 0       | 0        | 1       | 1       |
| Frankia             | 3              | 202            | 0       | 0        | 1        | 1       | 1       | 0       | 1        | 0        | 0       | 0       | 1       | 0       | 0        | 0       | 1        | 0        | 1       | 0        | 0       | 1       |
| Frateuria           | 1              | 25             | 0       | 0        | 0        | 0       | 0       | 0       | 0        | 0        | 0       | 0       | 0       | 0       | 0        | 0       | 0        | 0        | 0       | 0        | 0       | 0       |
| Fructobacillus      | 1              | 2              | 0       | 0        | 0        | 0       | 0       | 0       | 0        | 0        | 0       | 0       | 0       | 0       | 0        | 0       | 0        | 0        | 0       | 0        | 0       | 0       |
| Fulvimarina         | 1              | 2              | 0       | 0        | 0        | 0       | 0       | 0       | 0        | 0        | 0       | 0       | 0       | 0       | 0        | 0       | 0        | 0        | 0       | 0        | 0       | 0       |
| Fusobacterium       | 1              | 48             | 0       | 0        | 0        | 1       | 0       | 0       | 1        | 0        | 0       | 1       | 0       | 0       | 0        | 0       | 0        | 0        | 0       | 0        | 0       | 0       |
| Gallibacterium      | 2              | 87             | 0       | 1        | 1        | 1       | 0       | 0       | 0        | 0        | 0       | 0       | 1       | 0       | 0        | 0       | 0        | 0        | 1       | 0        | 1       | 1       |
| Gallionella         | 2              | 67             | 1       | 0        | 0        | 1       | 0       | 0       | 0        | 0        | 0       | 0       | 0       | 0       | 0        | 1       | 0        | 0        | 0       | 0        | 1       | 0       |
| Gammaproteobacteria | 1              | 9              | 0       | 0        | 0        | 1       | 0       | 0       | 0        | 0        | 0       | 0       | 0       | 0       | 0        | 0       | 0        | 0        | 0       | 0        | 0       | 0       |
| Gardnerella         | 1              | 31             | 0       | 0        | 0        | 1       | 0       | 0       | 0        | 0        | 0       | 0       | 0       | 0       | 0        | 0       | 0        | 0        | 0       | 0        | 0       | 0       |
| Geitlerinema        | 1              | 9              | 0       | 0        | 0        | 0       | 0       | 0       | 0        | 0        | 0       | 0       | 0       | 0       | 0        | 0       | 0        | 0        | 0       | 0        | 0       | 0       |
| Gemmatimonas        | 2              | 93             | 0       | 1        | 1        | 1       | 0       | 0       | 0        | 0        | 0       | 0       | 1       | 1       | 0        | 1       | 1        | 0        | 1       | 1        | 1       | 0       |
| Geobacillus         | 2              | 168            | 1       | 1        | 1        | 1       | 0       | 0       | 0        | 0        | 0       | 0       | 1       | 1       | 0        | 0       | 0        | 0        | 0       | 0        | 1       | 0       |
| Geobacter           | 2              | 150            | 1       | 0        | 0        | 1       | 0       | 0       | 1        | 1        | 1       | 0       | 1       | 0       | 0        | 1       | 1        | 0        | 0       | 0        | 1       | 0       |
| Geodermatophilus    | 2              | 136            | 1       | 1        | 0        | 1       | 0       | 0       | 0        | 0        | 1       | 1       | 1       | 0       | 0        | 0       | 1        | 0        | 1       | 0        | 0       | 0       |
| Geopsychrobacter    | 1              | 2              | 0       | 0        | 0        | 0       | 0       | 0       | 0        | 0        | 0       | 0       | 0       | 0       | 0        | 0       | 0        | 0        | 0       | 0        | 0       | 0       |
| Gillisia            | 1              | 11             | 0       | 1        | 0        | 1       | 0       | 0       | 0        | 0        | 0       | 0       | 0       | 0       | 0        | 0       | 0        | 0        | 0       | 0        | 0       | 0       |
| Gilvimarinus        | 1              | 4              | 0       | 0        | 0        | 1       | 0       | 0       | 0        | 0        | 0       | 0       | 0       | 0       | 0        | 0       | 0        | 0        | 0       | 0        | 0       | 0       |
| Glaciecola          | 2              | 117            | 0       | 1        | 1        | 1       | 0       | 0       | 0        | 0        | 0       | 0       | 0       | 0       | 0        | 1       | 1        | 0        | 1       | 0        | 1       | 1       |

| Genus             | Cluster Number | Protein Counts | 2.6.1.- | 2.7.1.21 | 2.7.1.48 | 2.7.4.- | 2.8.3.- | 2.8.3.1 | 2.8.3.12 | 2.8.3.15 | 2.8.3.6 | 2.8.3.8 | 3.1.1.- | 3.1.1.1 | 3.1.1.17 | 3.1.1.2 | 3.1.1.24 | 3.1.1.45 | 3.1.2.- | 3.1.2.23 | 3.1.3.1 | 3.1.3.2 |
|-------------------|----------------|----------------|---------|----------|----------|---------|---------|---------|----------|----------|---------|---------|---------|---------|----------|---------|----------|----------|---------|----------|---------|---------|
| Gloeobacter       | 2              | 67             | 1       | 0        | 1        | 1       | 0       | 0       | 0        | 0        | 0       | 0       | 0       | 0       | 1        | 0       | 0        | 0        | 0       | 0        | 1       | 0       |
| Gloeocapsa        | 1              | 20             | 0       | 0        | 0        | 0       | 0       | 0       | 0        | 0        | 0       | 0       | 0       | 0       | 0        | 0       | 0        | 0        | 0       | 0        | 0       | 0       |
| Gloeotheca        | 1              | 1              | 0       | 0        | 0        | 0       | 0       | 0       | 0        | 0        | 0       | 0       | 0       | 0       | 0        | 0       | 0        | 0        | 0       | 0        | 0       | 0       |
| Gluconacetobacter | 2              | 96             | 0       | 0        | 0        | 1       | 1       | 0       | 0        | 0        | 0       | 0       | 0       | 0       | 0        | 1       | 1        | 0        | 0       | 0        | 0       | 0       |
| Gluconobacter     | 2              | 76             | 0       | 1        | 0        | 1       | 0       | 0       | 0        | 0        | 0       | 0       | 0       | 0       | 1        | 0       | 0        | 0        | 0       | 0        | 0       | 1       |
| Gordonia          | 1              | 158            | 0       | 1        | 0        | 1       | 1       | 0       | 0        | 0        | 1       | 0       | 0       | 0       | 0        | 0       | 1        | 0        | 1       | 0        | 0       | 0       |
| Gordonibacter     | 1              | 32             | 0       | 0        | 0        | 1       | 0       | 0       | 0        | 0        | 0       | 0       | 0       | 0       | 0        | 0       | 0        | 0        | 0       | 0        | 0       | 0       |
| Gramella          | 2              | 104            | 1       | 1        | 1        | 1       | 0       | 0       | 0        | 0        | 0       | 0       | 0       | 1       | 0        | 1       | 1        | 0        | 0       | 0        | 1       | 0       |
| Granulibacter     | 2              | 90             | 0       | 0        | 0        | 1       | 0       | 0       | 0        | 0        | 0       | 0       | 1       | 0       | 0        | 0       | 1        | 1        | 0       | 0        | 1       | 1       |
| Granulicella      | 2              | 98             | 0       | 1        | 1        | 1       | 0       | 0       | 0        | 0        | 0       | 0       | 1       | 0       | 0        | 1       | 0        | 0        | 0       | 0        | 0       | 0       |
| Grimontia         | 1              | 9              | 0       | 0        | 0        | 1       | 0       | 0       | 0        | 0        | 0       | 0       | 0       | 0       | 0        | 0       | 0        | 0        | 0       | 0        | 0       | 0       |
| Haemophilus       | 2              | 117            | 0       | 1        | 1        | 1       | 0       | 0       | 0        | 0        | 0       | 1       | 1       | 0       | 1        | 0       | 0        | 0        | 1       | 0        | 1       | 1       |
| Hafnia            | 1              | 29             | 0       | 0        | 1        | 1       | 0       | 0       | 0        | 0        | 0       | 0       | 1       | 0       | 0        | 0       | 0        | 0        | 0       | 0        | 0       | 0       |
| Hahella           | 3              | 130            | 0       | 0        | 1        | 1       | 0       | 0       | 0        | 0        | 0       | 1       | 1       | 0       | 0        | 1       | 1        | 0        | 1       | 0        | 1       | 1       |
| Halalkalicoccus   | 1              | 18             | 0       | 0        | 0        | 0       | 0       | 0       | 0        | 0        | 0       | 0       | 0       | 0       | 0        | 0       | 0        | 0        | 0       | 0        | 0       | 0       |
| Halanaerobium     | 2              | 89             | 1       | 1        | 1        | 1       | 0       | 0       | 0        | 0        | 0       | 1       | 0       | 1       | 0        | 0       | 0        | 0        | 0       | 0        | 1       | 0       |
| Haliangium        | 2              | 108            | 0       | 0        | 1        | 1       | 0       | 0       | 0        | 0        | 0       | 0       | 1       | 0       | 1        | 0       | 0        | 0        | 0       | 0        | 1       | 0       |
| Haliscomenobacter | 2              | 107            | 0       | 1        | 0        | 1       | 0       | 0       | 0        | 0        | 0       | 0       | 0       | 0       | 1        | 0       | 0        | 0        | 1       | 0        | 1       | 0       |
| Haloarcula        | 1              | 22             | 0       | 0        | 0        | 0       | 0       | 0       | 0        | 0        | 0       | 0       | 0       | 0       | 0        | 0       | 0        | 0        | 0       | 0        | 0       | 0       |
| Halobacillus      | 1              | 19             | 0       | 0        | 0        | 0       | 0       | 0       | 0        | 0        | 0       | 0       | 0       | 0       | 0        | 0       | 0        | 0        | 0       | 0        | 0       | 0       |
| Halobacteriaceae  | 1              | 1              | 0       | 0        | 0        | 0       | 0       | 0       | 0        | 0        | 0       | 0       | 0       | 0       | 0        | 0       | 0        | 0        | 0       | 0        | 0       | 0       |
| Halobacterium     | 1              | 10             | 0       | 0        | 0        | 0       | 0       | 0       | 0        | 0        | 0       | 0       | 0       | 0       | 0        | 0       | 0        | 0        | 0       | 0        | 0       | 0       |
| Halobacteroides   | 1              | 14             | 0       | 0        | 0        | 0       | 0       | 0       | 0        | 0        | 0       | 0       | 0       | 0       | 0        | 0       | 0        | 0        | 0       | 0        | 0       | 0       |
| Haloferax         | 1              | 20             | 0       | 0        | 0        | 0       | 0       | 0       | 0        | 0        | 0       | 0       | 0       | 0       | 0        | 0       | 0        | 0        | 0       | 0        | 0       | 0       |
| Halogeometricum   | 1              | 12             | 0       | 0        | 0        | 0       | 0       | 0       | 0        | 0        | 0       | 0       | 0       | 0       | 0        | 0       | 0        | 0        | 0       | 0        | 0       | 0       |
| Halomicrobium     | 1              | 10             | 0       | 0        | 0        | 0       | 0       | 0       | 0        | 0        | 0       | 0       | 0       | 0       | 0        | 0       | 0        | 0        | 0       | 0        | 0       | 0       |
| Halomonas         | 1              | 149            | 0       | 0        | 0        | 1       | 0       | 0       | 1        | 0        | 0       | 1       | 1       | 0       | 1        | 1       | 0        | 0        | 1       | 0        | 1       | 1       |
| Halopiger         | 1              | 16             | 0       | 0        | 0        | 0       | 0       | 0       | 0        | 0        | 0       | 0       | 0       | 0       | 0        | 0       | 0        | 0        | 0       | 0        | 0       | 0       |
| Haloquadratum     | 1              | 19             | 0       | 0        | 0        | 0       | 0       | 0       | 0        | 0        | 0       | 0       | 0       | 0       | 0        | 0       | 0        | 0        | 0       | 0        | 0       | 0       |
| Halorhabdus       | 1              | 10             | 0       | 0        | 0        | 0       | 0       | 0       | 0        | 0        | 0       | 0       | 0       | 0       | 0        | 0       | 0        | 0        | 0       | 0        | 0       | 0       |
| Halorhodospira    | 2              | 71             | 0       | 0        | 0        | 1       | 0       | 0       | 0        | 0        | 0       | 0       | 0       | 0       | 0        | 1       | 0        | 0        | 0       | 0        | 0       | 0       |
| Halorubrum        | 1              | 16             | 0       | 0        | 0        | 0       | 0       | 0       | 0        | 0        | 0       | 0       | 0       | 0       | 0        | 0       | 0        | 0        | 0       | 0        | 0       | 0       |
| Haloterrigena     | 1              | 19             | 0       | 0        | 0        | 0       | 0       | 0       | 0        | 0        | 0       | 0       | 0       | 0       | 0        | 0       | 0        | 0        | 0       | 0        | 0       | 0       |
| Halothece         | 1              | 9              | 0       | 0        | 0        | 0       | 0       | 0       | 0        | 0        | 0       | 0       | 0       | 0       | 0        | 0       | 0        | 0        | 0       | 0        | 0       | 0       |
| Halothermothrix   | 2              | 50             | 0       | 1        | 1        | 1       | 0       | 0       | 0        | 0        | 0       | 0       | 0       | 1       | 0        | 0       | 0        | 0        | 0       | 0        | 0       | 0       |
| Halothiobacillus  | 2              | 65             | 0       | 0        | 0        | 1       | 0       | 0       | 0        | 0        | 0       | 0       | 0       | 0       | 0        | 1       | 0        | 0        | 0       | 0        | 1       | 0       |
| Halovivax         | 1              | 12             | 0       | 0        | 0        | 0       | 0       | 0       | 0        | 0        | 0       | 0       | 0       | 0       | 0        | 0       | 0        | 0        | 0       | 0        | 0       | 0       |
| Helicobacter      | 2              | 79             | 1       | 0        | 0        | 1       | 0       | 0       | 0        | 0        | 0       | 0       | 1       | 0       | 0        | 0       | 0        | 0        | 0       | 0        | 1       | 1       |
| Heliobacillus     | 1              | 4              | 0       | 0        | 0        | 0       | 0       | 0       | 0        | 0        | 0       | 0       | 0       | 0       | 0        | 0       | 0        | 0        | 0       | 0        | 0       | 0       |
| Heliobacterium    | 2              | 51             | 0       | 0        | 1        | 1       | 0       | 0       | 0        | 0        | 0       | 0       | 1       | 0       | 0        | 0       | 0        | 0        | 0       | 0        | 1       | 0       |
| Herbaspirillum    | 2              | 172            | 1       | 0        | 0        | 1       | 0       | 0       | 0        | 0        | 1       | 0       | 1       | 1       | 1        | 1       | 1        | 0        | 0       | 1        | 1       | 0       |
| Herminiimonas     | 3              | 89             | 0       | 0        | 0        | 1       | 0       | 0       | 0        | 0        | 0       | 0       | 0       | 1       | 1        | 1       | 1        | 0        | 1       | 0        | 1       | 0       |
| Herpetosiphon     | 3              | 90             | 1       | 1        | 1        | 1       | 0       | 0       | 0        | 0        | 0       | 0       | 1       | 1       | 0        | 0       | 1        | 0        | 0       | 0        | 1       | 0       |
| Hippea            | 2              | 44             | 0       | 0        | 0        | 1       | 0       | 0       | 0        | 0        | 0       | 1       | 0       | 0       | 0        | 0       | 0        | 0        | 0       | 0        | 0       | 0       |
| Hirschia          | 2              | 102            | 0       | 1        | 1        | 1       | 0       | 0       | 0        | 0        | 0       | 0       | 1       | 0       | 1        | 0       | 0        | 0        | 0       | 0        | 1       | 0       |
| Histophilus       | 2              | 72             | 0       | 1        | 1        | 1       | 0       | 0       | 0        | 0        | 0       | 1       | 1       | 0       | 1        | 0       | 0        | 0        | 0       | 0        | 1       | 0       |
| Hoeflea           | 1              | 16             | 0       | 1        | 0        | 0       | 0       | 0       | 0        | 0        | 0       | 0       | 0       | 0       | 0        | 0       | 0        | 0        | 0       | 0        | 0       | 0       |
| Hydrogenivirga    | 1              | 2              | 0       | 0        | 0        | 0       | 0       | 0       | 0        | 0        | 0       | 0       | 0       | 0       | 0        | 0       | 0        | 0        | 0       | 0        | 0       | 0       |
| Hydrogenobacter   | 2              | 55             | 0       | 0        | 0        | 1       | 0       | 0       | 0        | 0        | 0       | 0       | 0       | 0       | 0        | 0       | 0        | 0        | 0       | 0        | 1       | 0       |
| Hydrogenobaculum  | 2              | 44             | 0       | 0        | 0        | 1       | 0       | 0       | 0        | 0        | 0       | 0       | 0       | 0       | 0        | 0       | 0        | 0        | 0       | 0        | 0       | 0       |
| Hydrogenophaga    | 1              | 9              | 0       | 0        | 0        | 0       | 0       | 0       | 0        | 0        | 0       | 0       | 0       | 0       | 0        | 0       | 0        | 0        | 0       | 0        | 0       | 0       |
| Hylemonella       | 1              | 4              | 0       | 0        | 0        | 1       | 0       | 0       | 0        | 0        | 0       | 0       | 0       | 0       | 0        | 0       | 0        | 0        | 0       | 0        | 0       | 0       |

| Genus                 | Cluster Number | Protein Counts | 2.6.1.- | 2.7.1.21 | 2.7.1.48 | 2.7.4.- | 2.8.3.- | 2.8.3.1 | 2.8.3.12 | 2.8.3.15 | 2.8.3.6 | 2.8.3.8 | 3.1.1.- | 3.1.1.1 | 3.1.1.17 | 3.1.1.2 | 3.1.1.24 | 3.1.1.45 | 3.1.2.- | 3.1.2.23 | 3.1.3.1 | 3.1.3.2 |
|-----------------------|----------------|----------------|---------|----------|----------|---------|---------|---------|----------|----------|---------|---------|---------|---------|----------|---------|----------|----------|---------|----------|---------|---------|
| Hyperthermus          | 1              | 6              | 0       | 0        | 0        | 0       | 0       | 0       | 0        | 0        | 0       | 0       | 0       | 0       | 0        | 0       | 0        | 0        | 0       | 0        | 0       | 0       |
| Hyphomicrobium        | 2              | 93             | 1       | 0        | 0        | 1       | 0       | 0       | 0        | 0        | 0       | 1       | 1       | 0       | 0        | 1       | 1        | 0        | 1       | 0        | 0       | 0       |
| Hyphomonas            | 3              | 105            | 0       | 1        | 1        | 1       | 0       | 0       | 0        | 0        | 0       | 0       | 1       | 0       | 1        | 0       | 0        | 0        | 1       | 0        | 1       | 1       |
| Ideonella             | 1              | 18             | 0       | 0        | 0        | 1       | 0       | 0       | 0        | 0        | 0       | 0       | 0       | 0       | 0        | 0       | 0        | 0        | 0       | 0        | 0       | 0       |
| Idiomarina            | 2              | 86             | 0       | 1        | 1        | 1       | 0       | 0       | 0        | 0        | 0       | 0       | 0       | 0       | 0        | 1       | 0        | 0        | 1       | 0        | 1       | 0       |
| Ignavibacterium       | 1              | 14             | 0       | 0        | 0        | 0       | 0       | 0       | 0        | 0        | 0       | 0       | 0       | 0       | 0        | 0       | 0        | 0        | 0       | 0        | 0       | 0       |
| Ignicoccus            | 1              | 5              | 0       | 0        | 0        | 0       | 0       | 0       | 0        | 0        | 0       | 0       | 0       | 0       | 0        | 0       | 0        | 0        | 0       | 0        | 0       | 0       |
| Ignisphaera           | 1              | 8              | 0       | 0        | 0        | 0       | 0       | 0       | 0        | 0        | 0       | 0       | 0       | 0       | 0        | 0       | 0        | 0        | 0       | 0        | 0       | 0       |
| Ilyobacter            | 2              | 85             | 0       | 1        | 1        | 1       | 0       | 0       | 0        | 0        | 0       | 1       | 1       | 0       | 0        | 0       | 1        | 0        | 0       | 0        | 0       | 1       |
| Intrasporangium       | 2              | 114            | 0       | 1        | 0        | 1       | 0       | 0       | 0        | 0        | 1       | 0       | 0       | 0       | 1        | 0       | 0        | 0        | 1       | 0        | 0       | 0       |
| Isoptericola          | 1              | 18             | 0       | 0        | 0        | 0       | 0       | 0       | 0        | 0        | 0       | 0       | 0       | 0       | 0        | 0       | 0        | 0        | 0       | 0        | 0       | 0       |
| Isosphaera            | 2              | 75             | 1       | 0        | 0        | 1       | 0       | 0       | 0        | 0        | 0       | 0       | 1       | 0       | 1        | 0       | 1        | 0        | 0       | 0        | 1       | 1       |
| Jannaschia            | 3              | 151            | 0       | 1        | 0        | 1       | 0       | 1       | 0        | 0        | 0       | 0       | 1       | 0       | 0        | 1       | 1        | 0        | 0       | 1        | 1       | 0       |
| Janthinobacterium     | 2              | 99             | 0       | 0        | 0        | 1       | 0       | 0       | 0        | 0        | 0       | 0       | 1       | 0       | 1        | 1       | 1        | 0        | 1       | 0        | 1       | 0       |
| Jonesia               | 2              | 56             | 0       | 1        | 0        | 1       | 0       | 0       | 0        | 0        | 0       | 0       | 0       | 0       | 0        | 0       | 0        | 0        | 1       | 0        | 0       | 0       |
| Joostella             | 1              | 3              | 0       | 0        | 0        | 0       | 0       | 0       | 0        | 0        | 0       | 0       | 0       | 0       | 0        | 0       | 0        | 0        | 0       | 0        | 0       | 0       |
| Kaistia               | 1              | 2              | 0       | 0        | 0        | 0       | 0       | 0       | 0        | 0        | 0       | 0       | 0       | 0       | 0        | 0       | 0        | 0        | 0       | 0        | 0       | 0       |
| Kangiella             | 2              | 84             | 0       | 0        | 0        | 1       | 0       | 0       | 0        | 0        | 0       | 0       | 0       | 0       | 0        | 1       | 0        | 0        | 0       | 0        | 0       | 0       |
| Ketogulonicigenium    | 2              | 102            | 0       | 1        | 0        | 1       | 0       | 0       | 0        | 0        | 1       | 0       | 1       | 1       | 1        | 0       | 0        | 0        | 0       | 0        | 0       | 1       |
| Kineococcus           | 1              | 24             | 0       | 0        | 0        | 0       | 0       | 0       | 0        | 0        | 0       | 0       | 0       | 0       | 0        | 0       | 0        | 0        | 0       | 0        | 1       | 0       |
| Kinetoplastibacterium | 1              | 2              | 0       | 0        | 0        | 0       | 0       | 0       | 0        | 0        | 0       | 0       | 0       | 0       | 0        | 0       | 0        | 0        | 0       | 0        | 0       | 0       |
| Kingella              | 1              | 4              | 0       | 0        | 0        | 0       | 0       | 0       | 0        | 0        | 0       | 0       | 0       | 0       | 0        | 0       | 0        | 0        | 0       | 0        | 0       | 0       |
| Kitasatospora         | 1              | 36             | 0       | 0        | 0        | 0       | 0       | 0       | 0        | 0        | 0       | 0       | 0       | 0       | 0        | 0       | 0        | 0        | 0       | 0        | 0       | 0       |
| Klebsiella            | 3              | 222            | 1       | 1        | 1        | 1       | 0       | 0       | 0        | 0        | 1       | 1       | 1       | 0       | 1        | 1       | 1        | 1        | 1       | 0        | 1       | 0       |
| Kluyvera              | 1              | 1              | 0       | 0        | 0        | 0       | 0       | 0       | 0        | 0        | 0       | 0       | 0       | 0       | 0        | 0       | 0        | 0        | 0       | 0        | 0       | 0       |
| Kocuria               | 2              | 87             | 0       | 1        | 0        | 1       | 0       | 0       | 0        | 0        | 1       | 0       | 0       | 0       | 1        | 0       | 0        | 0        | 1       | 0        | 0       | 0       |
| Kordia                | 1              | 5              | 0       | 0        | 0        | 0       | 0       | 0       | 0        | 0        | 0       | 0       | 0       | 0       | 0        | 0       | 0        | 0        | 0       | 0        | 0       | 0       |
| Kosmotoga             | 2              | 61             | 0       | 1        | 1        | 1       | 0       | 0       | 0        | 0        | 0       | 0       | 0       | 1       | 0        | 0       | 0        | 0        | 0       | 0        | 1       | 0       |
| Kribbella             | 2              | 99             | 0       | 1        | 0        | 1       | 0       | 0       | 0        | 0        | 0       | 0       | 1       | 0       | 1        | 0       | 1        | 0        | 1       | 0        | 0       | 0       |
| Krokinobacter         | 2              | 90             | 0       | 1        | 1        | 1       | 0       | 0       | 0        | 0        | 0       | 0       | 0       | 1       | 0        | 1       | 0        | 0        | 0       | 0        | 1       | 0       |
| Kyrpidia              | 2              | 113            | 0       | 0        | 1        | 1       | 0       | 0       | 0        | 0        | 0       | 0       | 1       | 1       | 0        | 0       | 1        | 0        | 0       | 0        | 1       | 0       |
| Kytococcus            | 2              | 70             | 0       | 1        | 0        | 1       | 0       | 0       | 0        | 0        | 0       | 0       | 0       | 0       | 1        | 0       | 1        | 0        | 1       | 0        | 1       | 0       |
| Labrenzia             | 1              | 4              | 0       | 0        | 0        | 0       | 0       | 0       | 0        | 0        | 0       | 0       | 0       | 0       | 0        | 0       | 0        | 0        | 0       | 0        | 0       | 0       |
| Lachnoanaerobaculum   | 1              | 1              | 0       | 0        | 0        | 0       | 0       | 0       | 0        | 0        | 0       | 0       | 0       | 0       | 0        | 0       | 0        | 0        | 0       | 0        | 0       | 0       |
| Lachnospiraceae       | 1              | 51             | 0       | 0        | 1        | 1       | 0       | 0       | 0        | 0        | 0       | 1       | 1       | 0       | 0        | 0       | 0        | 0        | 0       | 0        | 0       | 0       |
| Lacinutrix            | 1              | 20             | 0       | 0        | 0        | 0       | 0       | 0       | 0        | 0        | 0       | 0       | 0       | 0       | 0        | 0       | 0        | 0        | 0       | 0        | 0       | 0       |
| Lactobacillus         | 2              | 119            | 1       | 1        | 1        | 1       | 0       | 0       | 0        | 0        | 0       | 0       | 1       | 1       | 0        | 1       | 0        | 0        | 0       | 0        | 1       | 0       |
| Lactococcus           | 2              | 82             | 1       | 1        | 1        | 1       | 0       | 0       | 0        | 0        | 0       | 0       | 1       | 1       | 0        | 0       | 0        | 0        | 0       | 0        | 0       | 0       |
| Lamprocystis          | 1              | 2              | 0       | 0        | 0        | 0       | 0       | 0       | 0        | 0        | 0       | 0       | 0       | 0       | 0        | 0       | 0        | 0        | 0       | 0        | 0       | 0       |
| Laribacter            | 2              | 80             | 1       | 0        | 0        | 1       | 0       | 0       | 0        | 0        | 0       | 0       | 0       | 0       | 0        | 1       | 1        | 0        | 0       | 0        | 0       | 1       |
| Lawsonia              | 2              | 33             | 0       | 0        | 0        | 1       | 0       | 0       | 0        | 0        | 0       | 0       | 1       | 0       | 0        | 0       | 0        | 0        | 0       | 0        | 0       | 1       |
| Leadbetterella        | 2              | 79             | 1       | 1        | 1        | 1       | 0       | 0       | 0        | 0        | 0       | 0       | 0       | 0       | 1        | 0       | 0        | 0        | 1       | 0        | 1       | 0       |
| Leeuwenhoekiiella     | 1              | 2              | 0       | 0        | 0        | 0       | 0       | 0       | 0        | 0        | 0       | 0       | 0       | 0       | 0        | 0       | 0        | 0        | 0       | 0        | 0       | 0       |
| Legionella            | 2              | 117            | 0       | 1        | 1        | 1       | 0       | 0       | 0        | 0        | 0       | 0       | 0       | 0       | 1        | 0       | 1        | 0        | 0       | 0        | 1       | 1       |
| Leifsonia             | 2              | 48             | 0       | 1        | 0        | 1       | 0       | 0       | 0        | 0        | 0       | 0       | 0       | 0       | 0        | 0       | 0        | 0        | 1       | 0        | 0       | 0       |
| Leptolyngbya          | 1              | 10             | 0       | 0        | 0        | 0       | 0       | 0       | 0        | 0        | 0       | 0       | 0       | 0       | 0        | 0       | 0        | 0        | 0       | 0        | 0       | 0       |
| Leptospira            | 2              | 76             | 1       | 0        | 0        | 1       | 0       | 0       | 0        | 0        | 0       | 0       | 0       | 0       | 0        | 1       | 0        | 0        | 0       | 0        | 1       | 0       |
| Leptospirillum        | 1              | 10             | 0       | 0        | 0        | 0       | 0       | 0       | 0        | 0        | 0       | 0       | 0       | 0       | 0        | 0       | 0        | 0        | 0       | 0        | 0       | 0       |
| Leptothrix            | 3              | 186            | 1       | 0        | 0        | 1       | 0       | 0       | 0        | 0        | 1       | 1       | 1       | 1       | 1        | 1       | 0        | 1        | 0       | 0        | 1       | 0       |
| Leptotrichia          | 2              | 43             | 1       | 1        | 1        | 1       | 0       | 0       | 0        | 0        | 0       | 0       | 1       | 0       | 0        | 0       | 0        | 0        | 0       | 0        | 0       | 0       |
| Leucobacter           | 1              | 2              | 0       | 0        | 0        | 0       | 0       | 0       | 0        | 0        | 0       | 0       | 0       | 0       | 0        | 0       | 0        | 0        | 0       | 0        | 0       | 0       |
| Leuconostoc           | 2              | 64             | 1       | 1        | 1        | 1       | 0       | 0       | 0        | 0        | 0       | 0       | 1       | 0       | 0        | 0       | 0        | 0        | 0       | 0        | 0       | 0       |

| Genus                | Cluster Number | Protein Counts | 2.6.1.- | 2.7.1.21 | 2.7.1.48 | 2.7.4.- | 2.8.3.- | 2.8.3.1 | 2.8.3.12 | 2.8.3.15 | 2.8.3.6 | 2.8.3.8 | 3.1.1.- | 3.1.1.1 | 3.1.1.17 | 3.1.1.2 | 3.1.1.24 | 3.1.1.45 | 3.1.2.- | 3.1.2.23 | 3.1.3.1 | 3.1.3.2 |
|----------------------|----------------|----------------|---------|----------|----------|---------|---------|---------|----------|----------|---------|---------|---------|---------|----------|---------|----------|----------|---------|----------|---------|---------|
| Liberibacter         | 1              | 4              | 0       | 0        | 0        | 0       | 0       | 0       | 0        | 0        | 0       | 0       | 0       | 0       | 0        | 0       | 0        | 0        | 0       | 0        | 0       | 0       |
| Limnohabitans        | 1              | 11             | 0       | 0        | 0        | 1       | 0       | 0       | 0        | 0        | 0       | 0       | 0       | 0       | 0        | 0       | 0        | 0        | 0       | 0        | 0       | 0       |
| Listeria             | 2              | 77             | 1       | 1        | 1        | 1       | 0       | 0       | 0        | 0        | 0       | 1       | 1       | 1       | 0        | 0       | 0        | 0        | 0       | 0        | 0       | 0       |
| Listeriaceae         | 1              | 6              | 0       | 0        | 0        | 1       | 0       | 0       | 0        | 0        | 0       | 0       | 0       | 0       | 0        | 0       | 0        | 0        | 0       | 0        | 0       | 0       |
| Listonella           | 1              | 38             | 0       | 0        | 1        | 1       | 0       | 0       | 0        | 0        | 0       | 0       | 0       | 0       | 0        | 0       | 0        | 0        | 1       | 0        | 0       | 0       |
| Loktanella           | 1              | 3              | 0       | 0        | 0        | 0       | 0       | 0       | 0        | 0        | 0       | 0       | 0       | 0       | 0        | 0       | 0        | 0        | 0       | 0        | 0       | 0       |
| Lysinibacillus       | 2              | 97             | 0       | 1        | 1        | 1       | 0       | 0       | 0        | 0        | 0       | 0       | 1       | 1       | 0        | 0       | 0        | 0        | 0       | 0        | 1       | 0       |
| Macrococcus          | 2              | 60             | 0       | 1        | 1        | 1       | 0       | 0       | 0        | 0        | 0       | 0       | 1       | 1       | 0        | 0       | 0        | 0        | 0       | 0        | 1       | 0       |
| Magnetococcus        | 2              | 64             | 0       | 0        | 0        | 1       | 0       | 0       | 0        | 0        | 0       | 0       | 0       | 0       | 0        | 0       | 0        | 0        | 0       | 0        | 0       | 0       |
| Magnetospirillum     | 2              | 113            | 1       | 0        | 0        | 1       | 0       | 0       | 0        | 0        | 0       | 0       | 1       | 0       | 0        | 0       | 1        | 0        | 0       | 0        | 1       | 0       |
| Mahella              | 2              | 58             | 0       | 0        | 1        | 1       | 0       | 0       | 0        | 0        | 0       | 0       | 0       | 0       | 0        | 0       | 0        | 0        | 0       | 0        | 0       | 0       |
| Mannheimia           | 2              | 85             | 0       | 1        | 1        | 1       | 0       | 0       | 0        | 0        | 0       | 0       | 1       | 0       | 1        | 0       | 0        | 0        | 1       | 0        | 0       | 0       |
| Maribacter           | 3              | 87             | 1       | 1        | 1        | 1       | 0       | 0       | 0        | 0        | 0       | 0       | 0       | 1       | 1        | 1       | 0        | 0        | 0       | 0        | 1       | 0       |
| Maricaulis           | 3              | 87             | 0       | 1        | 1        | 1       | 0       | 0       | 0        | 0        | 0       | 0       | 0       | 0       | 1        | 0       | 1        | 0        | 1       | 1        | 0       | 0       |
| Marichromatium       | 1              | 2              | 0       | 0        | 0        | 0       | 0       | 0       | 0        | 0        | 0       | 0       | 0       | 0       | 0        | 0       | 0        | 0        | 0       | 0        | 0       | 0       |
| Marinithermus        | 2              | 77             | 1       | 1        | 0        | 1       | 0       | 0       | 0        | 0        | 0       | 0       | 1       | 0       | 0        | 0       | 0        | 0        | 0       | 0        | 0       | 0       |
| Marinitoga           | 1              | 15             | 0       | 0        | 0        | 0       | 0       | 0       | 0        | 0        | 0       | 0       | 0       | 0       | 0        | 0       | 0        | 0        | 0       | 0        | 0       | 0       |
| Marinobacter         | 2              | 163            | 1       | 0        | 0        | 1       | 0       | 0       | 0        | 0        | 0       | 0       | 1       | 0       | 0        | 1       | 1        | 0        | 1       | 0        | 1       | 0       |
| Marinomonas          | 3              | 192            | 0       | 1        | 1        | 1       | 0       | 0       | 1        | 0        | 1       | 0       | 1       | 0       | 1        | 1       | 1        | 0        | 1       | 0        | 1       | 0       |
| Maritimibacter       | 1              | 7              | 0       | 0        | 0        | 0       | 0       | 0       | 0        | 0        | 0       | 0       | 0       | 0       | 0        | 0       | 0        | 0        | 0       | 0        | 0       | 0       |
| Marivirga            | 2              | 96             | 1       | 1        | 1        | 1       | 0       | 0       | 0        | 0        | 0       | 0       | 1       | 0       | 1        | 1       | 0        | 0        | 0       | 0        | 1       | 1       |
| Martelella           | 1              | 3              | 0       | 0        | 0        | 0       | 0       | 0       | 0        | 0        | 0       | 0       | 0       | 0       | 0        | 0       | 0        | 0        | 0       | 0        | 0       | 0       |
| Marvinbryantia       | 1              | 1              | 0       | 0        | 0        | 0       | 0       | 0       | 0        | 0        | 0       | 0       | 0       | 0       | 0        | 0       | 0        | 0        | 0       | 0        | 0       | 0       |
| Massilia             | 1              | 4              | 0       | 0        | 0        | 1       | 0       | 0       | 0        | 0        | 0       | 0       | 0       | 0       | 0        | 0       | 0        | 0        | 0       | 0        | 0       | 0       |
| Mastigocladopsis     | 1              | 16             | 0       | 0        | 0        | 1       | 0       | 0       | 0        | 0        | 0       | 0       | 0       | 0       | 0        | 0       | 0        | 0        | 0       | 0        | 0       | 0       |
| Megamonas            | 1              | 47             | 1       | 0        | 0        | 1       | 0       | 0       | 0        | 0        | 0       | 0       | 0       | 1       | 0        | 0       | 0        | 0        | 0       | 0        | 0       | 0       |
| Megasphaera          | 1              | 14             | 0       | 0        | 0        | 0       | 0       | 0       | 0        | 0        | 0       | 0       | 0       | 0       | 0        | 0       | 0        | 0        | 0       | 0        | 0       | 0       |
| Meiothermus          | 2              | 110            | 1       | 1        | 1        | 1       | 0       | 0       | 0        | 0        | 0       | 0       | 1       | 1       | 0        | 0       | 1        | 0        | 0       | 0        | 1       | 0       |
| Melissococcus        | 2              | 46             | 0       | 1        | 1        | 1       | 0       | 0       | 0        | 0        | 0       | 0       | 0       | 0       | 0        | 0       | 0        | 0        | 0       | 0        | 0       | 0       |
| Mesoflavibacter      | 1              | 6              | 0       | 0        | 0        | 0       | 0       | 0       | 0        | 0        | 0       | 0       | 0       | 0       | 0        | 0       | 0        | 0        | 0       | 0        | 0       | 0       |
| Mesoplasma           | 1              | 23             | 0       | 1        | 1        | 1       | 0       | 0       | 0        | 0        | 0       | 0       | 0       | 0       | 0        | 0       | 0        | 0        | 0       | 0        | 0       | 0       |
| Mesorhizobium        | 2              | 201            | 0       | 1        | 0        | 1       | 0       | 1       | 1        | 0        | 0       | 0       | 1       | 1       | 1        | 1       | 1        | 0        | 1       | 0        | 1       | 0       |
| Mesotoga             | 1              | 14             | 0       | 0        | 0        | 0       | 0       | 0       | 0        | 0        | 0       | 0       | 0       | 0       | 0        | 0       | 0        | 0        | 0       | 0        | 0       | 0       |
| Metallosphaera       | 1              | 18             | 0       | 0        | 0        | 0       | 0       | 0       | 0        | 0        | 0       | 0       | 0       | 0       | 0        | 0       | 0        | 0        | 0       | 0        | 0       | 0       |
| Methanobacterium     | 1              | 7              | 0       | 0        | 0        | 0       | 0       | 0       | 0        | 0        | 0       | 0       | 0       | 0       | 0        | 0       | 0        | 0        | 0       | 0        | 0       | 0       |
| Methanobrevibacter   | 1              | 9              | 0       | 0        | 0        | 0       | 0       | 0       | 0        | 0        | 0       | 0       | 0       | 0       | 0        | 0       | 0        | 0        | 0       | 0        | 0       | 0       |
| Methanocaldococcus   | 1              | 6              | 0       | 0        | 0        | 0       | 0       | 0       | 0        | 0        | 0       | 0       | 0       | 0       | 0        | 0       | 0        | 0        | 0       | 0        | 0       | 0       |
| Methanocella         | 1              | 15             | 0       | 0        | 0        | 0       | 0       | 0       | 0        | 0        | 0       | 0       | 0       | 0       | 0        | 0       | 0        | 0        | 0       | 0        | 0       | 0       |
| Methanococcaceae     | 1              | 1              | 0       | 0        | 0        | 0       | 0       | 0       | 0        | 0        | 0       | 0       | 0       | 0       | 0        | 0       | 0        | 0        | 0       | 0        | 0       | 0       |
| Methanococcoides     | 1              | 5              | 0       | 0        | 0        | 0       | 0       | 0       | 0        | 0        | 0       | 0       | 0       | 0       | 0        | 0       | 0        | 0        | 0       | 0        | 0       | 0       |
| Methanococcus        | 1              | 9              | 0       | 0        | 0        | 0       | 0       | 0       | 0        | 0        | 0       | 0       | 0       | 0       | 0        | 0       | 0        | 0        | 0       | 0        | 0       | 0       |
| Methanocorpusculum   | 1              | 7              | 0       | 0        | 0        | 0       | 0       | 0       | 0        | 0        | 0       | 0       | 0       | 0       | 0        | 0       | 0        | 0        | 0       | 0        | 0       | 0       |
| Methanoculleus       | 1              | 8              | 0       | 0        | 0        | 0       | 0       | 0       | 0        | 0        | 0       | 0       | 0       | 0       | 0        | 0       | 0        | 0        | 0       | 0        | 0       | 0       |
| Methanohalobium      | 1              | 5              | 0       | 0        | 0        | 0       | 0       | 0       | 0        | 0        | 0       | 0       | 0       | 0       | 0        | 0       | 0        | 0        | 0       | 0        | 0       | 0       |
| Methanohalophilus    | 1              | 5              | 0       | 0        | 0        | 0       | 0       | 0       | 0        | 0        | 0       | 0       | 0       | 0       | 0        | 0       | 0        | 0        | 0       | 0        | 0       | 0       |
| Methanolobus         | 1              | 5              | 0       | 0        | 0        | 0       | 0       | 0       | 0        | 0        | 0       | 0       | 0       | 0       | 0        | 0       | 0        | 0        | 0       | 0        | 0       | 0       |
| Methanomethylovorans | 1              | 5              | 0       | 0        | 0        | 0       | 0       | 0       | 0        | 0        | 0       | 0       | 0       | 0       | 0        | 0       | 0        | 0        | 0       | 0        | 0       | 0       |
| Methanoplanus        | 1              | 7              | 0       | 0        | 0        | 0       | 0       | 0       | 0        | 0        | 0       | 0       | 0       | 0       | 0        | 0       | 0        | 0        | 0       | 0        | 0       | 0       |
| Methanopyrus         | 1              | 4              | 0       | 0        | 0        | 0       | 0       | 0       | 0        | 0        | 0       | 0       | 0       | 0       | 0        | 0       | 0        | 0        | 0       | 0        | 0       | 0       |
| Methanoregula        | 1              | 8              | 0       | 0        | 0        | 0       | 0       | 0       | 0        | 0        | 0       | 0       | 0       | 0       | 0        | 0       | 0        | 0        | 0       | 0        | 0       | 0       |
| Methanosaeta         | 1              | 9              | 0       | 0        | 0        | 0       | 0       | 0       | 0        | 0        | 0       | 0       | 0       | 0       | 0        | 0       | 0        | 0        | 0       | 0        | 0       | 0       |
| Methanosalsum        | 1              | 7              | 0       | 0        | 0        | 0       | 0       | 0       | 0        | 0        | 0       | 0       | 0       | 0       | 0        | 0       | 0        | 0        | 0       | 0        | 0       | 0       |

| Genus               | Cluster Number | Protein Counts | 2.6.1.- | 2.7.1.21 | 2.7.1.48 | 2.7.4.- | 2.8.3.- | 2.8.3.1 | 2.8.3.12 | 2.8.3.15 | 2.8.3.6 | 2.8.3.8 | 3.1.1.- | 3.1.1.1 | 3.1.1.17 | 3.1.1.2 | 3.1.1.24 | 3.1.1.45 | 3.1.2.- | 3.1.2.23 | 3.1.3.1 | 3.1.3.2 |
|---------------------|----------------|----------------|---------|----------|----------|---------|---------|---------|----------|----------|---------|---------|---------|---------|----------|---------|----------|----------|---------|----------|---------|---------|
| Methanosarcina      | 1              | 18             | 0       | 0        | 0        | 0       | 0       | 0       | 0        | 0        | 0       | 0       | 0       | 0       | 0        | 0       | 0        | 0        | 0       | 0        | 0       | 0       |
| Methanospaera       | 1              | 7              | 0       | 0        | 0        | 0       | 0       | 0       | 0        | 0        | 0       | 0       | 0       | 0       | 0        | 0       | 0        | 0        | 0       | 0        | 0       | 0       |
| Methanospaerula     | 1              | 8              | 0       | 0        | 0        | 0       | 0       | 0       | 0        | 0        | 0       | 0       | 0       | 0       | 0        | 0       | 0        | 0        | 0       | 0        | 0       | 0       |
| Methanospirillum    | 1              | 6              | 0       | 0        | 0        | 0       | 0       | 0       | 0        | 0        | 0       | 0       | 0       | 0       | 0        | 0       | 0        | 0        | 0       | 0        | 0       | 0       |
| Methanothermobacter | 1              | 6              | 0       | 0        | 0        | 0       | 0       | 0       | 0        | 0        | 0       | 0       | 0       | 0       | 0        | 0       | 0        | 0        | 0       | 0        | 0       | 0       |
| Methanothermococcus | 1              | 5              | 0       | 0        | 0        | 0       | 0       | 0       | 0        | 0        | 0       | 0       | 0       | 0       | 0        | 0       | 0        | 0        | 0       | 0        | 0       | 0       |
| Methanothermus      | 1              | 5              | 0       | 0        | 0        | 0       | 0       | 0       | 0        | 0        | 0       | 0       | 0       | 0       | 0        | 0       | 0        | 0        | 0       | 0        | 0       | 0       |
| Methanotorris       | 1              | 5              | 0       | 0        | 0        | 0       | 0       | 0       | 0        | 0        | 0       | 0       | 0       | 0       | 0        | 0       | 0        | 0        | 0       | 0        | 0       | 0       |
| Methylacidiphilum   | 2              | 48             | 0       | 0        | 1        | 1       | 0       | 0       | 0        | 0        | 0       | 0       | 1       | 0       | 0        | 0       | 0        | 0        | 0       | 0        | 0       | 0       |
| Methylarcula        | 1              | 2              | 0       | 0        | 0        | 0       | 0       | 0       | 0        | 0        | 0       | 0       | 0       | 0       | 0        | 0       | 0        | 0        | 0       | 0        | 0       | 0       |
| Methylibium         | 1              | 38             | 0       | 0        | 0        | 0       | 0       | 0       | 0        | 0        | 0       | 0       | 0       | 0       | 0        | 0       | 0        | 0        | 0       | 0        | 0       | 0       |
| Methylobacillus     | 2              | 61             | 0       | 0        | 0        | 1       | 0       | 0       | 0        | 0        | 0       | 0       | 1       | 0       | 0        | 1       | 0        | 0        | 0       | 0        | 1       | 0       |
| Methylobacterium    | 3              | 236            | 1       | 0        | 0        | 1       | 0       | 1       | 0        | 0        | 1       | 1       | 1       | 1       | 1        | 1       | 1        | 0        | 1       | 0        | 1       | 0       |
| Methylocella        | 3              | 117            | 0       | 0        | 0        | 1       | 0       | 0       | 0        | 0        | 0       | 1       | 1       | 0       | 0        | 1       | 1        | 0        | 1       | 0        | 1       | 0       |
| Methylococcus       | 2              | 80             | 1       | 0        | 0        | 1       | 0       | 0       | 0        | 0        | 0       | 0       | 1       | 0       | 0        | 1       | 0        | 0        | 0       | 0        | 1       | 1       |
| Methylocystis       | 1              | 21             | 0       | 0        | 0        | 0       | 0       | 0       | 0        | 0        | 0       | 0       | 0       | 0       | 0        | 0       | 0        | 0        | 0       | 0        | 0       | 0       |
| Methyloferula       | 1              | 2              | 0       | 0        | 0        | 0       | 0       | 0       | 0        | 0        | 0       | 0       | 0       | 0       | 0        | 0       | 0        | 0        | 0       | 0        | 0       | 0       |
| Methylomicrobium    | 1              | 12             | 0       | 0        | 0        | 0       | 0       | 0       | 0        | 0        | 0       | 0       | 0       | 0       | 0        | 0       | 0        | 0        | 0       | 0        | 0       | 0       |
| Methylomonas        | 1              | 15             | 0       | 0        | 0        | 0       | 0       | 0       | 0        | 0        | 0       | 0       | 0       | 0       | 0        | 0       | 0        | 0        | 0       | 0        | 0       | 0       |
| Methylophaga        | 1              | 7              | 0       | 0        | 0        | 0       | 0       | 0       | 0        | 0        | 0       | 0       | 0       | 0       | 0        | 0       | 0        | 0        | 0       | 0        | 0       | 0       |
| Methylophilus       | 1              | 2              | 0       | 0        | 0        | 0       | 0       | 0       | 0        | 0        | 0       | 0       | 0       | 0       | 0        | 0       | 0        | 0        | 0       | 0        | 0       | 0       |
| Methylosinus        | 1              | 2              | 0       | 0        | 0        | 0       | 0       | 0       | 0        | 0        | 0       | 0       | 0       | 0       | 0        | 0       | 0        | 0        | 0       | 0        | 0       | 0       |
| Methylotenera       | 2              | 72             | 0       | 0        | 0        | 1       | 0       | 0       | 0        | 0        | 0       | 0       | 1       | 0       | 0        | 1       | 0        | 0        | 0       | 0        | 1       | 0       |
| Methyloversatilis   | 1              | 5              | 0       | 0        | 0        | 0       | 0       | 0       | 0        | 0        | 0       | 0       | 0       | 0       | 0        | 0       | 0        | 0        | 0       | 0        | 0       | 0       |
| Methylovorus        | 2              | 66             | 0       | 0        | 0        | 1       | 0       | 0       | 0        | 0        | 0       | 0       | 1       | 1       | 0        | 1       | 0        | 0        | 0       | 0        | 1       | 0       |
| Micavibrio          | 1              | 9              | 0       | 0        | 0        | 0       | 0       | 0       | 0        | 0        | 0       | 0       | 0       | 0       | 0        | 0       | 0        | 0        | 0       | 0        | 0       | 0       |
| Microbacterium      | 2              | 115            | 0       | 1        | 0        | 1       | 0       | 0       | 0        | 0        | 1       | 0       | 1       | 0       | 1        | 0       | 1        | 0        | 1       | 0        | 1       | 0       |
| Microchaete         | 1              | 23             | 0       | 0        | 1        | 1       | 0       | 0       | 0        | 0        | 0       | 0       | 0       | 0       | 0        | 0       | 0        | 0        | 0       | 0        | 0       | 0       |
| Micrococcus         | 2              | 72             | 0       | 1        | 0        | 1       | 0       | 0       | 0        | 0        | 0       | 0       | 0       | 0       | 1        | 0       | 0        | 0        | 1       | 0        | 0       | 0       |
| Microcoleus         | 1              | 17             | 0       | 0        | 0        | 0       | 0       | 0       | 0        | 0        | 0       | 0       | 0       | 0       | 0        | 0       | 0        | 0        | 0       | 0        | 0       | 0       |
| Microcystis         | 2              | 67             | 0       | 0        | 1        | 1       | 0       | 0       | 0        | 0        | 0       | 0       | 1       | 0       | 0        | 0       | 0        | 0        | 0       | 0        | 1       | 0       |
| Microlunatus        | 1              | 25             | 0       | 0        | 0        | 0       | 0       | 0       | 0        | 0        | 0       | 0       | 0       | 0       | 0        | 0       | 0        | 0        | 0       | 0        | 0       | 0       |
| Micromonospora      | 2              | 115            | 1       | 1        | 1        | 1       | 0       | 0       | 0        | 0        | 0       | 0       | 1       | 0       | 0        | 0       | 1        | 0        | 1       | 0        | 0       | 0       |
| Microvirga          | 1              | 6              | 0       | 0        | 0        | 0       | 0       | 0       | 0        | 0        | 0       | 0       | 0       | 0       | 0        | 0       | 0        | 0        | 0       | 0        | 0       | 0       |
| Mobiluncus          | 1              | 41             | 1       | 0        | 0        | 1       | 0       | 0       | 0        | 0        | 0       | 0       | 0       | 0       | 0        | 0       | 1        | 0        | 0       | 0        | 0       | 0       |
| Modestobacter       | 1              | 43             | 0       | 0        | 0        | 0       | 0       | 0       | 0        | 0        | 0       | 0       | 0       | 0       | 0        | 0       | 0        | 0        | 0       | 0        | 0       | 0       |
| Moorea              | 1              | 2              | 0       | 0        | 0        | 0       | 0       | 0       | 0        | 0        | 0       | 0       | 0       | 0       | 0        | 0       | 0        | 0        | 0       | 0        | 0       | 0       |
| Moorella            | 2              | 69             | 0       | 0        | 0        | 1       | 0       | 0       | 0        | 0        | 0       | 0       | 0       | 0       | 0        | 0       | 0        | 0        | 0       | 0        | 0       | 0       |
| Moraxella           | 2              | 66             | 0       | 0        | 0        | 1       | 0       | 0       | 0        | 0        | 0       | 0       | 0       | 0       | 0        | 0       | 0        | 0        | 1       | 0        | 0       | 0       |
| Morganella          | 1              | 29             | 0       | 0        | 0        | 1       | 0       | 0       | 0        | 0        | 0       | 0       | 0       | 0       | 0        | 1       | 0        | 0        | 0       | 0        | 0       | 0       |
| Moritella           | 1              | 2              | 0       | 0        | 0        | 0       | 0       | 0       | 0        | 0        | 0       | 0       | 0       | 0       | 0        | 0       | 0        | 0        | 0       | 0        | 0       | 0       |
| Muricauda           | 1              | 23             | 0       | 0        | 0        | 0       | 0       | 0       | 0        | 0        | 0       | 0       | 0       | 0       | 0        | 0       | 0        | 0        | 0       | 0        | 0       | 0       |
| Mycobacterium       | 3              | 306            | 0       | 0        | 0        | 1       | 1       | 0       | 1        | 0        | 1       | 1       | 1       | 1       | 1        | 1       | 1        | 0        | 1       | 0        | 1       | 1       |
| Mycoplasma          | 1              | 53             | 1       | 1        | 1        | 1       | 0       | 0       | 0        | 0        | 0       | 0       | 0       | 0       | 0        | 0       | 0        | 0        | 0       | 0        | 0       | 0       |
| Myxococcus          | 2              | 110            | 1       | 1        | 1        | 1       | 0       | 0       | 1        | 0        | 1       | 0       | 0       | 0       | 0        | 0       | 1        | 0        | 1       | 0        | 1       | 0       |
| Nakamurella         | 2              | 115            | 0       | 1        | 0        | 1       | 0       | 0       | 0        | 0        | 1       | 0       | 0       | 0       | 0        | 0       | 0        | 0        | 1       | 0        | 0       | 0       |
| napthalene          | 1              | 2              | 0       | 0        | 0        | 0       | 0       | 0       | 0        | 0        | 0       | 0       | 0       | 0       | 0        | 0       | 0        | 0        | 0       | 0        | 0       | 0       |
| Natranaerobius      | 2              | 55             | 0       | 1        | 0        | 1       | 0       | 0       | 0        | 0        | 0       | 0       | 0       | 1       | 0        | 0       | 1        | 0        | 0       | 0        | 0       | 0       |
| Natrialba           | 1              | 16             | 0       | 0        | 0        | 0       | 0       | 0       | 0        | 0        | 0       | 0       | 0       | 0       | 0        | 0       | 0        | 0        | 0       | 0        | 0       | 0       |
| Natrinema           | 1              | 16             | 0       | 0        | 0        | 0       | 0       | 0       | 0        | 0        | 0       | 0       | 0       | 0       | 0        | 0       | 0        | 0        | 0       | 0        | 0       | 0       |
| Natronobacterium    | 1              | 11             | 0       | 0        | 0        | 0       | 0       | 0       | 0        | 0        | 0       | 0       | 0       | 0       | 0        | 0       | 0        | 0        | 0       | 0        | 0       | 0       |
| Natronococcus       | 1              | 21             | 0       | 0        | 0        | 0       | 0       | 0       | 0        | 0        | 0       | 0       | 0       | 0       | 0        | 0       | 0        | 0        | 0       | 0        | 0       | 0       |

| Genus             | Cluster Number | Protein Counts | 2.6.1.- | 2.7.1.21 | 2.7.1.48 | 2.7.4.- | 2.8.3.- | 2.8.3.1 | 2.8.3.12 | 2.8.3.15 | 2.8.3.6 | 2.8.3.8 | 3.1.1.- | 3.1.1.1 | 3.1.1.17 | 3.1.1.2 | 3.1.1.24 | 3.1.1.45 | 3.1.2.- | 3.1.2.23 | 3.1.3.1 | 3.1.3.2 |
|-------------------|----------------|----------------|---------|----------|----------|---------|---------|---------|----------|----------|---------|---------|---------|---------|----------|---------|----------|----------|---------|----------|---------|---------|
| Natronomonas      | 1              | 20             | 0       | 0        | 0        | 0       | 0       | 0       | 0        | 0        | 0       | 0       | 0       | 0       | 0        | 0       | 0        | 0        | 0       | 0        | 0       | 0       |
| Nautilia          | 2              | 48             | 0       | 0        | 0        | 1       | 0       | 0       | 0        | 0        | 0       | 0       | 1       | 0       | 0        | 0       | 0        | 0        | 0       | 0        | 0       | 0       |
| Neisseria         | 2              | 67             | 0       | 0        | 0        | 1       | 0       | 0       | 0        | 0        | 0       | 0       | 1       | 0       | 0        | 0       | 0        | 0        | 0       | 0        | 1       | 0       |
| Neisseriaceae     | 1              | 1              | 0       | 0        | 0        | 0       | 0       | 0       | 0        | 0        | 0       | 0       | 0       | 0       | 0        | 0       | 0        | 0        | 0       | 0        | 0       | 0       |
| Neorickettsia     | 1              | 31             | 1       | 0        | 0        | 1       | 0       | 0       | 0        | 0        | 0       | 0       | 1       | 0       | 0        | 0       | 0        | 0        | 0       | 0        | 0       | 0       |
| Neptuniibacter    | 1              | 2              | 0       | 0        | 0        | 0       | 0       | 0       | 0        | 0        | 0       | 0       | 0       | 0       | 0        | 0       | 0        | 0        | 0       | 0        | 0       | 0       |
| Niastella         | 1              | 21             | 0       | 0        | 0        | 0       | 0       | 0       | 0        | 0        | 0       | 0       | 0       | 0       | 0        | 0       | 0        | 0        | 0       | 0        | 0       | 0       |
| Nitratifractor    | 2              | 54             | 1       | 0        | 0        | 1       | 0       | 0       | 0        | 0        | 0       | 0       | 1       | 0       | 0        | 0       | 0        | 0        | 0       | 0        | 0       | 0       |
| Nitratireductor   | 1              | 19             | 0       | 0        | 0        | 0       | 0       | 0       | 1        | 0        | 0       | 0       | 0       | 0       | 0        | 0       | 0        | 0        | 0       | 0        | 0       | 0       |
| Nitratiruptor     | 2              | 40             | 1       | 0        | 0        | 1       | 0       | 0       | 0        | 0        | 0       | 0       | 1       | 0       | 0        | 0       | 0        | 0        | 0       | 0        | 0       | 0       |
| Nitrobacter       | 2              | 99             | 1       | 0        | 0        | 1       | 0       | 0       | 0        | 0        | 1       | 0       | 1       | 0       | 0        | 1       | 0        | 0        | 1       | 0        | 0       | 0       |
| Nitrococcus       | 1              | 2              | 0       | 0        | 0        | 1       | 0       | 0       | 0        | 0        | 0       | 0       | 0       | 0       | 0        | 0       | 0        | 0        | 0       | 0        | 0       | 0       |
| Nitrosococcus     | 2              | 94             | 0       | 0        | 0        | 1       | 0       | 0       | 0        | 0        | 0       | 0       | 0       | 0       | 1        | 1       | 1        | 0        | 0       | 0        | 0       | 0       |
| Nitrosomonas      | 2              | 72             | 0       | 0        | 0        | 1       | 0       | 0       | 0        | 0        | 0       | 0       | 1       | 0       | 0        | 1       | 0        | 0        | 0       | 0        | 0       | 0       |
| Nitrosopumilaceae | 1              | 7              | 0       | 0        | 0        | 0       | 0       | 0       | 0        | 0        | 0       | 0       | 0       | 0       | 0        | 0       | 0        | 0        | 0       | 0        | 0       | 0       |
| Nitrosopumilus    | 1              | 11             | 0       | 0        | 0        | 0       | 0       | 0       | 0        | 0        | 0       | 0       | 0       | 0       | 0        | 0       | 0        | 0        | 0       | 0        | 0       | 0       |
| Nitrospira        | 2              | 74             | 0       | 0        | 0        | 1       | 0       | 0       | 0        | 0        | 0       | 0       | 1       | 0       | 0        | 1       | 0        | 0        | 0       | 0        | 0       | 0       |
| Nocardia          | 2              | 185            | 0       | 0        | 0        | 1       | 1       | 0       | 1        | 0        | 0       | 0       | 1       | 0       | 0        | 0       | 1        | 1        | 1       | 0        | 0       | 0       |
| Nocardioidaceae   | 1              | 2              | 0       | 0        | 0        | 0       | 0       | 0       | 0        | 0        | 0       | 0       | 0       | 0       | 0        | 0       | 0        | 0        | 0       | 0        | 0       | 0       |
| Nocardioides      | 2              | 157            | 1       | 1        | 0        | 1       | 1       | 0       | 1        | 0        | 1       | 0       | 1       | 0       | 0        | 0       | 1        | 0        | 1       | 0        | 0       | 1       |
| Nocardiopsis      | 2              | 102            | 0       | 1        | 0        | 1       | 0       | 0       | 1        | 0        | 0       | 0       | 1       | 0       | 0        | 0       | 1        | 0        | 0       | 0        | 1       | 0       |
| Nodularia         | 1              | 22             | 0       | 0        | 0        | 1       | 0       | 0       | 0        | 0        | 0       | 0       | 0       | 0       | 0        | 0       | 0        | 0        | 0       | 0        | 0       | 0       |
| Nonlabens         | 1              | 19             | 0       | 0        | 0        | 0       | 0       | 0       | 0        | 0        | 0       | 0       | 0       | 0       | 0        | 0       | 0        | 0        | 0       | 0        | 0       | 0       |
| Nostoc            | 2              | 111            | 0       | 0        | 1        | 1       | 0       | 0       | 0        | 0        | 0       | 0       | 0       | 0       | 1        | 1       | 1        | 0        | 0       | 0        | 1       | 1       |
| Nostocaceae       | 1              | 2              | 0       | 0        | 1        | 0       | 0       | 0       | 0        | 0        | 0       | 0       | 0       | 0       | 0        | 0       | 0        | 0        | 0       | 0        | 0       | 0       |
| Novosphingobium   | 2              | 169            | 0       | 1        | 0        | 1       | 1       | 0       | 0        | 0        | 1       | 0       | 1       | 0       | 0        | 1       | 1        | 0        | 1       | 0        | 1       | 0       |
| Oceanibaculum     | 1              | 3              | 0       | 0        | 0        | 0       | 0       | 0       | 0        | 0        | 0       | 0       | 0       | 0       | 0        | 0       | 0        | 0        | 0       | 0        | 0       | 0       |
| Oceanibulbus      | 1              | 12             | 0       | 0        | 0        | 1       | 0       | 0       | 0        | 0        | 0       | 0       | 0       | 0       | 0        | 0       | 0        | 0        | 0       | 0        | 0       | 0       |
| Oceanicola        | 1              | 9              | 0       | 0        | 0        | 0       | 0       | 0       | 0        | 0        | 0       | 0       | 0       | 0       | 0        | 0       | 0        | 0        | 0       | 0        | 0       | 0       |
| Oceanimonas       | 1              | 33             | 0       | 0        | 0        | 1       | 0       | 0       | 0        | 0        | 0       | 0       | 0       | 0       | 0        | 0       | 0        | 0        | 0       | 0        | 0       | 0       |
| Oceaniovalibus    | 1              | 2              | 0       | 0        | 0        | 0       | 0       | 0       | 0        | 0        | 0       | 0       | 0       | 0       | 0        | 0       | 0        | 0        | 0       | 0        | 0       | 0       |
| Oceanithermus     | 2              | 72             | 1       | 1        | 1        | 1       | 0       | 0       | 0        | 0        | 0       | 0       | 0       | 0       | 0        | 0       | 1        | 0        | 0       | 0        | 0       | 0       |
| Oceanobacillus    | 2              | 91             | 1       | 1        | 1        | 1       | 0       | 0       | 0        | 0        | 0       | 0       | 1       | 1       | 0        | 0       | 0        | 0        | 0       | 0        | 1       | 0       |
| Oceanospirillum   | 1              | 2              | 0       | 0        | 0        | 0       | 0       | 0       | 0        | 0        | 0       | 0       | 0       | 0       | 0        | 0       | 0        | 0        | 0       | 0        | 0       | 0       |
| Ochrobactrum      | 2              | 133            | 0       | 0        | 0        | 1       | 0       | 1       | 0        | 0        | 1       | 0       | 1       | 1       | 1        | 1       | 1        | 0        | 1       | 0        | 1       | 0       |
| Octadecabacter    | 1              | 29             | 0       | 0        | 0        | 0       | 0       | 0       | 0        | 0        | 0       | 0       | 0       | 0       | 0        | 0       | 0        | 0        | 0       | 0        | 0       | 0       |
| Oenococcus        | 2              | 41             | 1       | 1        | 1        | 1       | 0       | 0       | 0        | 0        | 0       | 0       | 0       | 0       | 0        | 0       | 0        | 0        | 0       | 0        | 0       | 0       |
| Oleomonas         | 1              | 2              | 0       | 0        | 0        | 0       | 0       | 0       | 0        | 0        | 0       | 0       | 0       | 0       | 0        | 0       | 0        | 0        | 0       | 0        | 0       | 0       |
| Oligotropha       | 3              | 87             | 0       | 0        | 0        | 1       | 0       | 0       | 1        | 0        | 1       | 0       | 1       | 0       | 0        | 1       | 0        | 0        | 1       | 0        | 0       | 0       |
| Olsenella         | 2              | 40             | 0       | 1        | 0        | 1       | 0       | 0       | 0        | 0        | 0       | 0       | 0       | 0       | 0        | 0       | 0        | 0        | 0       | 0        | 0       | 0       |
| Opitutus          | 2              | 67             | 1       | 0        | 1        | 1       | 0       | 0       | 0        | 0        | 0       | 0       | 0       | 1       | 1        | 1       | 0        | 0        | 0       | 0        | 0       | 0       |
| Orientia          | 1              | 21             | 0       | 0        | 0        | 1       | 0       | 0       | 0        | 0        | 0       | 0       | 1       | 0       | 0        | 0       | 0        | 0        | 0       | 0        | 0       | 0       |
| Ornithobacterium  | 1              | 11             | 0       | 0        | 0        | 0       | 0       | 0       | 0        | 0        | 0       | 0       | 0       | 0       | 0        | 0       | 0        | 0        | 0       | 0        | 0       | 0       |
| Oscillatoria      | 1              | 16             | 0       | 0        | 0        | 0       | 0       | 0       | 0        | 0        | 0       | 0       | 0       | 0       | 0        | 0       | 0        | 0        | 0       | 0        | 0       | 0       |
| Oscillatoriales   | 1              | 2              | 0       | 0        | 0        | 0       | 0       | 0       | 0        | 0        | 0       | 0       | 0       | 0       | 0        | 0       | 0        | 0        | 0       | 0        | 0       | 0       |
| Oscillibacter     | 1              | 20             | 0       | 0        | 0        | 0       | 0       | 0       | 0        | 0        | 0       | 0       | 0       | 0       | 0        | 0       | 0        | 0        | 0       | 0        | 0       | 0       |
| Owenweeksia       | 1              | 15             | 0       | 0        | 0        | 0       | 0       | 0       | 0        | 0        | 0       | 0       | 0       | 0       | 0        | 0       | 0        | 0        | 0       | 0        | 0       | 0       |
| Oxalobacteraceae  | 1              | 4              | 0       | 0        | 0        | 1       | 0       | 0       | 0        | 0        | 0       | 0       | 0       | 0       | 0        | 0       | 0        | 0        | 0       | 0        | 0       | 0       |
| Paenibacillus     | 2              | 152            | 1       | 1        | 1        | 1       | 0       | 0       | 0        | 0        | 0       | 0       | 1       | 1       | 1        | 0       | 1        | 0        | 0       | 0        | 1       | 1       |
| Paludibacter      | 2              | 67             | 0       | 1        | 1        | 1       | 1       | 0       | 0        | 0        | 0       | 0       | 0       | 0       | 0        | 0       | 0        | 0        | 0       | 1        | 1       | 0       |
| Pandoraea         | 1              | 18             | 0       | 0        | 0        | 1       | 0       | 0       | 0        | 0        | 0       | 0       | 0       | 0       | 0        | 0       | 0        | 0        | 0       | 0        | 0       | 0       |
| Pannonibacter     | 1              | 3              | 0       | 0        | 0        | 0       | 0       | 0       | 0        | 0        | 0       | 0       | 0       | 0       | 0        | 0       | 0        | 0        | 0       | 0        | 0       | 0       |

| Genus              | Cluster Number | Protein Counts | 2.6.1.- | 2.7.1.21 | 2.7.1.48 | 2.7.4.- | 2.8.3.- | 2.8.3.1 | 2.8.3.12 | 2.8.3.15 | 2.8.3.6 | 2.8.3.8 | 3.1.1.- | 3.1.1.1 | 3.1.1.17 | 3.1.1.2 | 3.1.1.24 | 3.1.1.45 | 3.1.2.- | 3.1.2.23 | 3.1.3.1 | 3.1.3.2 |
|--------------------|----------------|----------------|---------|----------|----------|---------|---------|---------|----------|----------|---------|---------|---------|---------|----------|---------|----------|----------|---------|----------|---------|---------|
| Pantholops         | 1              | 23             | 0       | 0        | 0        | 0       | 0       | 0       | 0        | 0        | 0       | 0       | 0       | 0       | 0        | 0       | 0        | 0        | 0       | 0        | 0       | 0       |
| Pantoea            | 2              | 181            | 1       | 1        | 1        | 1       | 0       | 0       | 0        | 0        | 1       | 0       | 1       | 0       | 1        | 1       | 1        | 1        | 1       | 0        | 1       | 0       |
| Parabacteroides    | 2              | 64             | 1       | 1        | 1        | 1       | 0       | 0       | 0        | 0        | 0       | 0       | 0       | 1       | 1        | 0       | 0        | 0        | 0       | 0        | 1       | 0       |
| Parachlamydia      | 1              | 11             | 0       | 0        | 0        | 0       | 0       | 0       | 0        | 0        | 0       | 0       | 0       | 0       | 0        | 0       | 0        | 0        | 0       | 0        | 0       | 0       |
| Paracoccus         | 2              | 169            | 0       | 1        | 0        | 1       | 0       | 0       | 0        | 0        | 1       | 0       | 1       | 1       | 0        | 1       | 1        | 0        | 0       | 1        | 1       | 1       |
| Parvibaculum       | 3              | 117            | 0       | 0        | 0        | 1       | 0       | 0       | 0        | 0        | 0       | 0       | 1       | 0       | 1        | 1       | 1        | 0        | 1       | 0        | 0       | 0       |
| Parvularcula       | 2              | 72             | 0       | 0        | 0        | 1       | 0       | 0       | 0        | 0        | 0       | 0       | 1       | 0       | 0        | 0       | 0        | 0        | 1       | 0        | 1       | 0       |
| Pasteurella        | 2              | 85             | 0       | 1        | 1        | 1       | 0       | 0       | 0        | 0        | 0       | 0       | 1       | 0       | 1        | 0       | 0        | 0        | 1       | 0        | 0       | 0       |
| Pasteurellaceae    | 1              | 2              | 0       | 0        | 0        | 0       | 0       | 0       | 0        | 0        | 0       | 0       | 0       | 0       | 0        | 0       | 0        | 0        | 0       | 0        | 0       | 0       |
| Pectobacterium     | 1              | 44             | 0       | 0        | 0        | 1       | 0       | 0       | 0        | 0        | 0       | 0       | 0       | 0       | 0        | 0       | 0        | 0        | 0       | 0        | 0       | 0       |
| Pediococcus        | 1              | 43             | 1       | 1        | 1        | 1       | 0       | 0       | 0        | 0        | 0       | 0       | 0       | 0       | 0        | 0       | 0        | 0        | 0       | 0        | 0       | 0       |
| Pedobacter         | 2              | 88             | 1       | 1        | 1        | 1       | 0       | 0       | 0        | 0        | 0       | 0       | 1       | 1       | 1        | 1       | 0        | 0        | 0       | 0        | 1       | 1       |
| Pelagibaca         | 1              | 10             | 0       | 0        | 0        | 0       | 0       | 0       | 0        | 0        | 0       | 0       | 0       | 0       | 0        | 0       | 0        | 0        | 0       | 0        | 0       | 0       |
| Pelagibacterium    | 1              | 39             | 0       | 0        | 0        | 0       | 0       | 0       | 0        | 0        | 0       | 0       | 0       | 0       | 0        | 0       | 0        | 0        | 0       | 0        | 0       | 0       |
| Pelobacter         | 2              | 85             | 1       | 0        | 0        | 1       | 0       | 0       | 0        | 0        | 0       | 0       | 1       | 0       | 0        | 1       | 0        | 0        | 0       | 0        | 1       | 0       |
| Pelodictyon        | 2              | 62             | 0       | 0        | 1        | 1       | 0       | 0       | 0        | 0        | 0       | 0       | 1       | 1       | 0        | 0       | 1        | 0        | 0       | 0        | 1       | 1       |
| Pelosinus          | 1              | 1              | 0       | 0        | 0        | 0       | 0       | 0       | 0        | 0        | 0       | 0       | 0       | 0       | 0        | 0       | 0        | 0        | 0       | 0        | 0       | 0       |
| Pelotomaculum      | 2              | 60             | 0       | 0        | 0        | 1       | 0       | 0       | 1        | 0        | 1       | 1       | 0       | 0       | 0        | 0       | 0        | 0        | 0       | 0        | 1       | 0       |
| Peptostreptococcus | 1              | 1              | 0       | 0        | 0        | 0       | 0       | 0       | 0        | 0        | 0       | 0       | 0       | 0       | 0        | 0       | 0        | 0        | 0       | 0        | 0       | 0       |
| Persephonella      | 2              | 55             | 0       | 0        | 0        | 1       | 0       | 0       | 0        | 0        | 0       | 0       | 1       | 0       | 0        | 0       | 0        | 0        | 0       | 0        | 0       | 0       |
| Petrogona          | 2              | 72             | 1       | 1        | 1        | 1       | 0       | 0       | 0        | 0        | 0       | 1       | 0       | 1       | 0        | 0       | 0        | 0        | 0       | 0        | 1       | 0       |
| Phaeobacter        | 2              | 55             | 0       | 0        | 0        | 0       | 0       | 0       | 0        | 0        | 0       | 0       | 0       | 0       | 0        | 0       | 0        | 0        | 0       | 0        | 0       | 0       |
| Phenylobacterium   | 3              | 103            | 1       | 0        | 0        | 1       | 0       | 0       | 0        | 0        | 0       | 0       | 1       | 0       | 1        | 1       | 1        | 0        | 1       | 0        | 1       | 0       |
| Photobacterium     | 2              | 119            | 0       | 1        | 1        | 1       | 0       | 0       | 0        | 0        | 0       | 0       | 1       | 0       | 0        | 1       | 1        | 0        | 1       | 0        | 1       | 0       |
| Photorhabdus       | 2              | 149            | 1       | 1        | 1        | 1       | 0       | 0       | 1        | 0        | 1       | 1       | 1       | 0       | 0        | 0       | 1        | 0        | 1       | 0        | 1       | 0       |
| Phycisphaera       | 1              | 9              | 0       | 0        | 0        | 0       | 0       | 0       | 0        | 0        | 0       | 0       | 0       | 0       | 0        | 0       | 0        | 0        | 0       | 0        | 0       | 0       |
| Phyllobacterium    | 1              | 6              | 0       | 0        | 0        | 0       | 0       | 0       | 0        | 0        | 0       | 0       | 0       | 0       | 0        | 0       | 0        | 0        | 0       | 0        | 0       | 0       |
| Picrophilus        | 1              | 15             | 0       | 0        | 0        | 0       | 0       | 0       | 0        | 0        | 0       | 0       | 0       | 0       | 0        | 0       | 0        | 0        | 0       | 0        | 0       | 0       |
| Pirellula          | 2              | 85             | 0       | 0        | 0        | 1       | 0       | 0       | 0        | 0        | 0       | 0       | 0       | 1       | 1        | 0       | 1        | 0        | 0       | 0        | 1       | 0       |
| Planctomyces       | 2              | 93             | 0       | 0        | 0        | 1       | 0       | 0       | 0        | 0        | 0       | 0       | 0       | 0       | 1        | 1       | 0        | 0        | 0       | 0        | 1       | 0       |
| Plautia            | 1              | 17             | 0       | 0        | 1        | 1       | 0       | 0       | 0        | 0        | 0       | 0       | 0       | 0       | 0        | 0       | 0        | 0        | 0       | 0        | 0       | 0       |
| Plesiomonas        | 1              | 4              | 0       | 0        | 0        | 1       | 0       | 0       | 0        | 0        | 0       | 0       | 0       | 0       | 0        | 0       | 0        | 0        | 0       | 0        | 0       | 0       |
| Pleurocapsa        | 1              | 23             | 0       | 0        | 0        | 0       | 0       | 0       | 0        | 0        | 0       | 0       | 0       | 0       | 0        | 0       | 0        | 0        | 0       | 0        | 0       | 0       |
| Polaribacter       | 2              | 74             | 0       | 1        | 1        | 1       | 0       | 0       | 0        | 0        | 0       | 0       | 0       | 1       | 0        | 0       | 0        | 0        | 1       | 0        | 1       | 0       |
| Polaromonas        | 3              | 238            | 0       | 0        | 0        | 1       | 0       | 0       | 0        | 0        | 1       | 1       | 1       | 1       | 1        | 1       | 1        | 0        | 0       | 1        | 0       | 0       |
| Polymorphum        | 3              | 173            | 0       | 1        | 0        | 1       | 0       | 0       | 1        | 0        | 1       | 0       | 1       | 1       | 1        | 1       | 1        | 0        | 1       | 0        | 0       | 0       |
| Polynucleobacter   | 1              | 19             | 0       | 0        | 0        | 0       | 0       | 0       | 0        | 0        | 0       | 0       | 0       | 0       | 0        | 0       | 0        | 0        | 0       | 0        | 0       | 0       |
| Ponticaulis        | 1              | 1              | 0       | 0        | 0        | 0       | 0       | 0       | 0        | 0        | 0       | 0       | 0       | 0       | 0        | 0       | 0        | 0        | 0       | 0        | 0       | 0       |
| Porphyromonas      | 2              | 63             | 0       | 1        | 1        | 1       | 0       | 0       | 0        | 0        | 0       | 0       | 0       | 0       | 0        | 0       | 0        | 0        | 0       | 0        | 1       | 1       |
| Prevotella         | 1              | 65             | 0       | 1        | 1        | 1       | 0       | 0       | 0        | 0        | 0       | 0       | 0       | 1       | 0        | 0       | 0        | 0        | 0       | 1        | 1       | 0       |
| Prochlorococcus    | 2              | 68             | 0       | 0        | 0        | 1       | 0       | 0       | 0        | 0        | 0       | 0       | 1       | 0       | 0        | 0       | 0        | 0        | 0       | 0        | 1       | 1       |
| Propionibacterium  | 1              | 62             | 1       | 1        | 0        | 1       | 0       | 0       | 0        | 0        | 0       | 0       | 0       | 0       | 0        | 0       | 0        | 0        | 1       | 0        | 0       | 0       |
| Prosthecochloris   | 1              | 16             | 0       | 0        | 0        | 0       | 0       | 0       | 0        | 0        | 0       | 0       | 0       | 0       | 0        | 0       | 0        | 0        | 0       | 0        | 0       | 0       |
| Proteobacteria     | 1              | 19             | 0       | 0        | 0        | 0       | 0       | 0       | 0        | 0        | 0       | 0       | 0       | 0       | 0        | 0       | 0        | 0        | 0       | 0        | 0       | 0       |
| Proteus            | 2              | 113            | 1       | 1        | 1        | 1       | 1       | 0       | 0        | 0        | 0       | 0       | 1       | 0       | 0        | 1       | 0        | 0        | 1       | 0        | 1       | 0       |
| Providencia        | 1              | 38             | 0       | 0        | 0        | 1       | 0       | 0       | 0        | 0        | 0       | 0       | 1       | 0       | 0        | 0       | 0        | 0        | 0       | 0        | 0       | 0       |
| Pseudaminobacter   | 1              | 10             | 0       | 0        | 0        | 0       | 0       | 0       | 0        | 0        | 0       | 0       | 0       | 0       | 0        | 0       | 0        | 0        | 0       | 0        | 0       | 0       |
| Pseudanabaena      | 1              | 11             | 0       | 0        | 0        | 0       | 0       | 0       | 0        | 0        | 0       | 0       | 0       | 0       | 0        | 0       | 0        | 0        | 0       | 0        | 0       | 0       |
| Pseudoalteromonas  | 2              | 188            | 1       | 1        | 1        | 1       | 0       | 0       | 0        | 0        | 1       | 0       | 1       | 0       | 1        | 1       | 1        | 0        | 1       | 0        | 1       | 1       |
| Pseudochrobactrum  | 1              | 7              | 0       | 0        | 0        | 0       | 0       | 0       | 0        | 0        | 0       | 0       | 0       | 0       | 0        | 0       | 0        | 0        | 0       | 0        | 0       | 0       |
| Pseudogulbenkiania | 1              | 40             | 0       | 0        | 0        | 0       | 0       | 0       | 0        | 0        | 0       | 0       | 0       | 0       | 0        | 0       | 0        | 0        | 0       | 0        | 0       | 0       |
| pseudomallei       | 3              | 131            | 1       | 0        | 0        | 1       | 0       | 0       | 0        | 0        | 1       | 1       | 1       | 1       | 1        | 1       | 1        | 0        | 0       | 0        | 0       | 0       |



| Genus                   | Cluster Number | Protein Counts | 2.6.1.- | 2.7.1.21 | 2.7.1.48 | 2.7.4.- | 2.8.3.- | 2.8.3.1 | 2.8.3.12 | 2.8.3.15 | 2.8.3.6 | 2.8.3.8 | 3.1.1.- | 3.1.1.1 | 3.1.1.17 | 3.1.1.2 | 3.1.1.24 | 3.1.1.45 | 3.1.2.- | 3.1.2.23 | 3.1.3.1 | 3.1.3.2 |
|-------------------------|----------------|----------------|---------|----------|----------|---------|---------|---------|----------|----------|---------|---------|---------|---------|----------|---------|----------|----------|---------|----------|---------|---------|
| Pseudomonas             | 3              | 381            | 1       | 1        | 0        | 1       | 0       | 0       | 1        | 0        | 1       | 1       | 1       | 1       | 1        | 1       | 1        | 1        | 1       | 1        | 1       | 1       |
| Pseudonocardia          | 3              | 180            | 0       | 0        | 1        | 1       | 0       | 0       | 1        | 0        | 1       | 0       | 0       | 0       | 1        | 0       | 1        | 0        | 1       | 0        | 0       | 0       |
| Pseudorhodobacter       | 1              | 4              | 0       | 0        | 0        | 0       | 0       | 0       | 0        | 0        | 0       | 0       | 0       | 0       | 0        | 0       | 0        | 0        | 0       | 0        | 0       | 0       |
| Pseudovibrio            | 1              | 33             | 0       | 0        | 0        | 0       | 0       | 0       | 0        | 0        | 0       | 0       | 0       | 0       | 0        | 0       | 0        | 0        | 0       | 0        | 0       | 0       |
| Pseudoxanthomonas       | 2              | 124            | 0       | 1        | 0        | 1       | 0       | 0       | 0        | 0        | 0       | 0       | 1       | 0       | 1        | 1       | 0        | 0        | 1       | 1        | 1       | 1       |
| Psychrobacter           | 2              | 124            | 0       | 0        | 0        | 1       | 0       | 0       | 0        | 0        | 1       | 1       | 0       | 1       | 0        | 1       | 1        | 0        | 1       | 0        | 1       | 0       |
| Psychroflexus           | 1              | 22             | 0       | 0        | 0        | 0       | 0       | 0       | 0        | 0        | 0       | 0       | 0       | 0       | 0        | 0       | 0        | 0        | 0       | 0        | 0       | 0       |
| Psychromonas            | 2              | 110            | 0       | 1        | 1        | 1       | 0       | 0       | 0        | 0        | 0       | 0       | 1       | 0       | 0        | 1       | 0        | 0        | 1       | 0        | 1       | 0       |
| Pusillimonas            | 3              | 111            | 0       | 0        | 0        | 1       | 0       | 0       | 0        | 0        | 1       | 0       | 1       | 0       | 0        | 1       | 0        | 0        | 0       | 0        | 0       | 0       |
| Pyrobaculum             | 1              | 15             | 0       | 0        | 0        | 0       | 0       | 0       | 0        | 0        | 0       | 0       | 0       | 0       | 0        | 0       | 0        | 0        | 0       | 0        | 0       | 0       |
| Pyrococcus              | 1              | 10             | 0       | 0        | 0        | 0       | 0       | 0       | 0        | 0        | 0       | 0       | 0       | 0       | 0        | 0       | 0        | 0        | 0       | 0        | 0       | 0       |
| Pyrolobus               | 1              | 4              | 0       | 0        | 0        | 0       | 0       | 0       | 0        | 0        | 0       | 0       | 0       | 0       | 0        | 0       | 0        | 0        | 0       | 0        | 0       | 0       |
| Rahnella                | 2              | 143            | 1       | 1        | 1        | 1       | 0       | 0       | 0        | 0        | 0       | 0       | 1       | 0       | 0        | 1       | 1        | 1        | 1       | 0        | 1       | 0       |
| Ralstonia               | 3              | 332            | 1       | 0        | 0        | 1       | 1       | 0       | 1        | 0        | 1       | 1       | 1       | 0       | 1        | 1       | 1        | 0        | 0       | 1        | 1       | 1       |
| Ramlibacter             | 1              | 35             | 0       | 0        | 0        | 0       | 0       | 0       | 0        | 0        | 0       | 0       | 0       | 0       | 0        | 0       | 0        | 0        | 0       | 0        | 0       | 0       |
| Raoultella              | 2              | 139            | 1       | 1        | 1        | 1       | 0       | 0       | 0        | 0        | 1       | 0       | 1       | 0       | 0        | 1       | 0        | 1        | 1       | 0        | 1       | 0       |
| Raphidiopsis            | 1              | 5              | 0       | 0        | 0        | 1       | 0       | 0       | 0        | 0        | 0       | 0       | 0       | 0       | 0        | 0       | 0        | 0        | 0       | 0        | 0       | 0       |
| Reinekea                | 1              | 2              | 0       | 0        | 0        | 0       | 0       | 0       | 0        | 0        | 0       | 0       | 0       | 0       | 0        | 0       | 0        | 0        | 0       | 0        | 0       | 0       |
| Renibacterium           | 2              | 67             | 0       | 1        | 0        | 1       | 0       | 0       | 0        | 0        | 0       | 0       | 0       | 0       | 0        | 0       | 0        | 0        | 1       | 0        | 0       | 0       |
| Rhizobiaceae            | 1              | 3              | 0       | 0        | 0        | 0       | 0       | 0       | 0        | 0        | 0       | 0       | 0       | 0       | 0        | 0       | 0        | 0        | 0       | 0        | 0       | 0       |
| Rhizobiales             | 1              | 6              | 0       | 0        | 0        | 0       | 0       | 0       | 0        | 0        | 0       | 0       | 0       | 0       | 0        | 0       | 0        | 0        | 0       | 0        | 0       | 0       |
| Rhizobium               | 3              | 257            | 1       | 1        | 0        | 1       | 1       | 1       | 1        | 0        | 1       | 1       | 1       | 1       | 1        | 1       | 1        | 0        | 1       | 0        | 1       | 1       |
| Rhizobium/Agrobacterium | 2              | 87             | 0       | 0        | 0        | 1       | 0       | 0       | 0        | 0        | 1       | 0       | 0       | 0       | 0        | 0       | 0        | 0        | 0       | 0        | 1       | 1       |
| Rhodanobacter           | 1              | 21             | 0       | 0        | 0        | 0       | 0       | 0       | 0        | 0        | 0       | 0       | 0       | 0       | 0        | 0       | 0        | 0        | 0       | 0        | 0       | 0       |
| Rhodobacter             | 3              | 175            | 1       | 1        | 0        | 1       | 0       | 0       | 0        | 0        | 1       | 1       | 1       | 1       | 1        | 1       | 1        | 0        | 1       | 0        | 1       | 0       |
| Rhodobacteraceae        | 1              | 21             | 0       | 0        | 0        | 1       | 0       | 0       | 0        | 0        | 0       | 0       | 0       | 0       | 0        | 0       | 0        | 0        | 0       | 0        | 0       | 0       |
| Rhodobacterales         | 1              | 34             | 0       | 0        | 0        | 0       | 0       | 0       | 0        | 0        | 0       | 0       | 0       | 0       | 0        | 0       | 0        | 0        | 0       | 0        | 0       | 0       |
| Rhodococcus             | 2              | 292            | 1       | 0        | 1        | 1       | 1       | 1       | 1        | 0        | 1       | 1       | 1       | 0       | 1        | 0       | 1        | 0        | 1       | 0        | 1       | 0       |
| Rhodocyclaceae          | 1              | 7              | 0       | 0        | 0        | 0       | 0       | 0       | 0        | 0        | 0       | 0       | 0       | 0       | 0        | 0       | 0        | 0        | 0       | 0        | 0       | 0       |
| Rhodoferax              | 3              | 144            | 1       | 1        | 0        | 1       | 0       | 0       | 0        | 0        | 1       | 0       | 1       | 1       | 1        | 1       | 1        | 0        | 1       | 0        | 1       | 0       |
| Rhodomicrobium          | 2              | 103            | 0       | 0        | 0        | 1       | 0       | 0       | 0        | 0        | 0       | 0       | 1       | 0       | 0        | 1       | 1        | 0        | 1       | 0        | 1       | 0       |
| Rhodopirellula          | 2              | 87             | 0       | 1        | 0        | 1       | 0       | 0       | 0        | 0        | 0       | 0       | 0       | 1       | 1        | 0       | 0        | 0        | 0       | 0        | 1       | 0       |
| Rhodopseudomonas        | 3              | 246            | 1       | 0        | 0        | 1       | 0       | 0       | 1        | 0        | 1       | 1       | 1       | 1       | 1        | 1       | 1        | 0        | 1       | 0        | 1       | 0       |
| Rhodospirillum          | 2              | 121            | 0       | 1        | 0        | 1       | 0       | 0       | 0        | 0        | 0       | 1       | 1       | 0       | 1        | 1       | 1        | 0        | 0       | 0        | 1       | 0       |
| Rhodothermus            | 2              | 76             | 0       | 1        | 1        | 1       | 0       | 0       | 0        | 0        | 0       | 0       | 0       | 0       | 1        | 0       | 0        | 1        | 0       | 1        | 1       | 1       |
| Rhodovulum              | 1              | 4              | 0       | 0        | 0        | 0       | 0       | 0       | 0        | 0        | 0       | 0       | 0       | 0       | 0        | 0       | 0        | 0        | 0       | 0        | 0       | 0       |
| Richelia                | 1              | 2              | 0       | 0        | 0        | 1       | 0       | 0       | 0        | 0        | 0       | 0       | 0       | 0       | 0        | 0       | 0        | 0        | 0       | 0        | 0       | 0       |
| Rickettsia              | 2              | 43             | 0       | 0        | 0        | 1       | 0       | 0       | 0        | 0        | 0       | 0       | 1       | 0       | 0        | 0       | 0        | 0        | 0       | 0        | 0       | 0       |
| Rickettsiaceae          | 1              | 5              | 0       | 0        | 0        | 0       | 0       | 0       | 0        | 0        | 0       | 0       | 0       | 0       | 0        | 0       | 0        | 0        | 0       | 0        | 0       | 0       |
| Riemerella              | 2              | 61             | 0       | 1        | 1        | 1       | 0       | 0       | 0        | 0        | 0       | 0       | 0       | 0       | 0        | 0       | 0        | 0        | 0       | 0        | 1       | 0       |
| Rivularia               | 1              | 18             | 0       | 0        | 0        | 0       | 0       | 0       | 0        | 0        | 0       | 0       | 0       | 0       | 0        | 0       | 0        | 0        | 0       | 0        | 0       | 0       |
| Robiginitalea           | 2              | 83             | 0       | 1        | 1        | 1       | 0       | 0       | 0        | 0        | 0       | 0       | 1       | 1       | 1        | 0       | 0        | 0        | 0       | 1        | 0       | 0       |
| Roseburia               | 2              | 58             | 0       | 0        | 1        | 1       | 0       | 0       | 0        | 0        | 0       | 0       | 0       | 0       | 0        | 0       | 0        | 0        | 0       | 0        | 0       | 0       |
| Roseibium               | 1              | 3              | 0       | 0        | 0        | 0       | 0       | 0       | 0        | 0        | 0       | 0       | 0       | 0       | 0        | 0       | 0        | 0        | 0       | 0        | 0       | 0       |
| Roseiflexus             | 3              | 100            | 0       | 1        | 0        | 1       | 0       | 0       | 0        | 0        | 0       | 0       | 1       | 1       | 1        | 0       | 1        | 0        | 0       | 0        | 1       | 0       |
| Roseobacter             | 2              | 149            | 0       | 1        | 0        | 1       | 0       | 1       | 0        | 0        | 0       | 0       | 1       | 1       | 1        | 1       | 1        | 0        | 0       | 0        | 1       | 0       |
| Roseomonas              | 1              | 2              | 0       | 0        | 0        | 0       | 0       | 0       | 0        | 0        | 0       | 0       | 0       | 0       | 0        | 0       | 0        | 0        | 0       | 0        | 0       | 0       |
| Roseovarius             | 1              | 15             | 0       | 0        | 0        | 0       | 0       | 0       | 0        | 0        | 0       | 0       | 0       | 0       | 0        | 0       | 0        | 0        | 0       | 0        | 0       | 0       |
| Rothia                  | 1              | 44             | 0       | 0        | 0        | 1       | 0       | 0       | 0        | 0        | 0       | 0       | 0       | 0       | 0        | 0       | 0        | 0        | 1       | 0        | 0       | 0       |
| Rubrivivax              | 1              | 24             | 0       | 0        | 0        | 0       | 0       | 0       | 0        | 0        | 0       | 0       | 0       | 0       | 0        | 0       | 0        | 0        | 0       | 0        | 0       | 0       |
| Rubrobacter             | 3              | 117            | 0       | 1        | 0        | 1       | 0       | 0       | 1        | 0        | 0       | 0       | 0       | 1       | 0        | 0       | 1        | 0        | 0       | 0        | 1       | 0       |
| Ruegeria                | 2              | 189            | 0       | 1        | 0        | 1       | 0       | 0       | 0        | 0        | 1       | 0       | 1       | 0       | 1        | 1       | 1        | 0        | 1       | 1        | 1       | 0       |

| Genus             | Cluster Number | Protein Counts | 2.6.1.- | 2.7.1.21 | 2.7.1.48 | 2.7.4.- | 2.8.3.- | 2.8.3.1 | 2.8.3.12 | 2.8.3.15 | 2.8.3.6 | 2.8.3.8 | 3.1.1.- | 3.1.1.1 | 3.1.1.17 | 3.1.1.2 | 3.1.1.24 | 3.1.1.45 | 3.1.2.- | 3.1.2.23 | 3.1.3.1 | 3.1.3.2 |
|-------------------|----------------|----------------|---------|----------|----------|---------|---------|---------|----------|----------|---------|---------|---------|---------|----------|---------|----------|----------|---------|----------|---------|---------|
| Ruminococcaceae   | 1              | 2              | 0       | 0        | 0        | 0       | 0       | 0       | 0        | 0        | 0       | 0       | 0       | 0       | 0        | 0       | 0        | 0        | 0       | 0        | 0       | 0       |
| Ruminococcus      | 2              | 101            | 1       | 1        | 1        | 1       | 0       | 0       | 0        | 0        | 0       | 1       | 1       | 0       | 0        | 1       | 0        | 0        | 0       | 0        | 1       | 0       |
| Runella           | 1              | 26             | 0       | 0        | 0        | 0       | 0       | 0       | 0        | 0        | 0       | 0       | 0       | 0       | 0        | 0       | 0        | 0        | 0       | 0        | 0       | 0       |
| Saccharomonospora | 2              | 132            | 0       | 1        | 1        | 1       | 0       | 0       | 1        | 0        | 1       | 0       | 1       | 1       | 0        | 0       | 1        | 0        | 1       | 0        | 0       | 0       |
| Saccharophagus    | 2              | 81             | 0       | 0        | 0        | 1       | 0       | 0       | 0        | 0        | 0       | 0       | 0       | 0       | 1        | 1       | 0        | 0        | 1       | 0        | 1       | 0       |
| Saccharopolyspora | 3              | 194            | 1       | 0        | 1        | 1       | 0       | 0       | 1        | 0        | 1       | 0       | 1       | 1       | 1        | 0       | 1        | 1        | 1       | 0        | 0       | 0       |
| Saccharothrix     | 1              | 32             | 0       | 0        | 0        | 0       | 0       | 0       | 0        | 0        | 0       | 0       | 0       | 0       | 0        | 0       | 0        | 0        | 0       | 0        | 0       | 0       |
| Sagittula         | 1              | 10             | 0       | 0        | 0        | 0       | 0       | 0       | 0        | 0        | 0       | 0       | 0       | 0       | 0        | 0       | 0        | 0        | 0       | 0        | 0       | 0       |
| Salinibacter      | 2              | 77             | 0       | 1        | 1        | 1       | 0       | 0       | 0        | 0        | 0       | 0       | 0       | 0       | 0        | 1       | 0        | 0        | 0       | 0        | 1       | 1       |
| Salinimonas       | 1              | 1              | 0       | 0        | 0        | 0       | 0       | 0       | 0        | 0        | 0       | 0       | 0       | 0       | 0        | 0       | 0        | 0        | 0       | 0        | 0       | 0       |
| Salinispora       | 3              | 127            | 1       | 1        | 1        | 1       | 1       | 0       | 0        | 0        | 0       | 0       | 1       | 0       | 1        | 0       | 1        | 0        | 1       | 0        | 0       | 0       |
| Salinivibrio      | 1              | 2              | 0       | 0        | 0        | 0       | 0       | 0       | 0        | 0        | 0       | 0       | 0       | 0       | 0        | 0       | 0        | 0        | 0       | 0        | 0       | 0       |
| Salmonella        | 2              | 151            | 1       | 1        | 1        | 1       | 1       | 0       | 0        | 0        | 0       | 1       | 1       | 0       | 0        | 1       | 0        | 1        | 1       | 0        | 0       | 1       |
| Sanguibacter      | 2              | 73             | 1       | 1        | 1        | 1       | 0       | 0       | 0        | 0        | 0       | 0       | 1       | 0       | 1        | 0       | 1        | 0        | 1       | 0        | 1       | 0       |
| Saprospira        | 1              | 13             | 0       | 0        | 0        | 0       | 0       | 0       | 0        | 0        | 0       | 0       | 0       | 0       | 0        | 0       | 0        | 0        | 0       | 0        | 0       | 0       |
| Scardovia         | 1              | 1              | 0       | 0        | 0        | 0       | 0       | 0       | 0        | 0        | 0       | 0       | 0       | 0       | 0        | 0       | 0        | 0        | 0       | 0        | 0       | 0       |
| Scytonema         | 1              | 10             | 0       | 0        | 0        | 1       | 0       | 0       | 0        | 0        | 0       | 0       | 0       | 0       | 0        | 0       | 0        | 0        | 0       | 0        | 0       | 0       |
| Sebaldella        | 2              | 69             | 0       | 1        | 1        | 1       | 0       | 0       | 0        | 0        | 0       | 0       | 1       | 0       | 0        | 0       | 0        | 0        | 0       | 0        | 1       | 1       |
| Segniliparus      | 2              | 85             | 0       | 0        | 0        | 1       | 0       | 0       | 0        | 0        | 0       | 1       | 0       | 0       | 0        | 0       | 0        | 0        | 1       | 0        | 0       | 0       |
| Selenomonas       | 2              | 57             | 0       | 0        | 1        | 1       | 0       | 0       | 0        | 0        | 0       | 0       | 0       | 1       | 0        | 0       | 0        | 0        | 0       | 0        | 0       | 0       |
| Serinicoccus      | 1              | 1              | 0       | 0        | 0        | 0       | 0       | 0       | 0        | 0        | 0       | 0       | 0       | 0       | 0        | 0       | 0        | 0        | 0       | 0        | 0       | 0       |
| Serratia          | 2              | 186            | 1       | 1        | 1        | 1       | 0       | 0       | 0        | 0        | 1       | 1       | 1       | 0       | 1        | 1       | 1        | 1        | 1       | 0        | 1       | 1       |
| Shewanella        | 3              | 214            | 1       | 1        | 1        | 1       | 1       | 0       | 1        | 0        | 1       | 0       | 1       | 0       | 1        | 1       | 1        | 0        | 1       | 0        | 1       | 0       |
| Shigella          | 2              | 172            | 1       | 1        | 1        | 1       | 1       | 0       | 0        | 0        | 0       | 1       | 1       | 0       | 0        | 1       | 0        | 1        | 1       | 0        | 1       | 1       |
| Shinella          | 1              | 2              | 0       | 0        | 0        | 0       | 0       | 0       | 0        | 0        | 0       | 0       | 0       | 0       | 0        | 0       | 0        | 0        | 0       | 0        | 0       | 0       |
| Sideroxydans      | 2              | 81             | 1       | 0        | 0        | 1       | 0       | 0       | 0        | 0        | 0       | 0       | 0       | 0       | 0        | 1       | 0        | 0        | 0       | 0        | 1       | 1       |
| Silicibacter      | 2              | 105            | 0       | 0        | 0        | 1       | 0       | 0       | 0        | 0        | 0       | 0       | 0       | 0       | 0        | 0       | 0        | 0        | 0       | 0        | 1       | 0       |
| Simiduia          | 1              | 18             | 0       | 0        | 0        | 1       | 0       | 0       | 0        | 0        | 0       | 0       | 0       | 0       | 0        | 0       | 0        | 0        | 0       | 0        | 0       | 0       |
| Simkania          | 1              | 6              | 0       | 0        | 0        | 0       | 0       | 0       | 0        | 0        | 0       | 0       | 0       | 0       | 0        | 0       | 0        | 0        | 0       | 0        | 0       | 0       |
| Simonsiella       | 1              | 2              | 0       | 0        | 0        | 0       | 0       | 0       | 0        | 0        | 0       | 0       | 0       | 0       | 0        | 0       | 0        | 0        | 0       | 0        | 0       | 0       |
| Singulisphaera    | 1              | 18             | 0       | 0        | 0        | 0       | 0       | 0       | 0        | 0        | 0       | 0       | 0       | 0       | 0        | 0       | 0        | 0        | 0       | 0        | 0       | 0       |
| Sinorhizobium     | 3              | 207            | 1       | 1        | 0        | 1       | 0       | 1       | 1        | 0        | 1       | 0       | 1       | 1       | 1        | 1       | 1        | 0        | 1       | 0        | 1       | 0       |
| Slackia           | 2              | 46             | 0       | 0        | 0        | 1       | 0       | 0       | 0        | 0        | 0       | 0       | 0       | 0       | 0        | 0       | 1        | 0        | 0       | 0        | 0       | 0       |
| Smaragdicoccus    | 1              | 3              | 0       | 0        | 0        | 0       | 0       | 0       | 0        | 0        | 0       | 0       | 0       | 0       | 0        | 0       | 0        | 0        | 0       | 0        | 0       | 0       |
| Sodalis           | 2              | 71             | 1       | 1        | 1        | 1       | 0       | 0       | 0        | 0        | 0       | 0       | 1       | 0       | 0        | 0       | 0        | 0        | 0       | 0        | 0       | 0       |
| Solibacillus      | 1              | 23             | 0       | 0        | 0        | 0       | 0       | 0       | 0        | 0        | 0       | 0       | 0       | 0       | 0        | 0       | 0        | 0        | 0       | 0        | 0       | 0       |
| Solitaea          | 1              | 13             | 0       | 0        | 0        | 0       | 0       | 0       | 0        | 0        | 0       | 0       | 0       | 0       | 0        | 0       | 0        | 0        | 0       | 0        | 0       | 0       |
| Sorangium         | 3              | 115            | 1       | 0        | 0        | 1       | 0       | 0       | 0        | 0        | 0       | 0       | 1       | 0       | 1        | 0       | 1        | 0        | 0       | 1        | 0       | 0       |
| Sphaerobacter     | 2              | 100            | 1       | 0        | 0        | 1       | 0       | 0       | 1        | 0        | 0       | 0       | 1       | 1       | 0        | 0       | 0        | 0        | 0       | 0        | 0       | 0       |
| Sphaerochaeta     | 1              | 42             | 0       | 0        | 1        | 0       | 0       | 0       | 0        | 0        | 0       | 0       | 0       | 0       | 0        | 0       | 0        | 0        | 0       | 0        | 1       | 0       |
| Sphingobacterium  | 3              | 85             | 1       | 1        | 0        | 1       | 0       | 0       | 0        | 0        | 0       | 0       | 1       | 1       | 1        | 0       | 1        | 0        | 0       | 0        | 1       | 1       |
| Sphingobium       | 1              | 179            | 0       | 1        | 0        | 1       | 0       | 0       | 0        | 0        | 1       | 0       | 1       | 0       | 1        | 1       | 1        | 0        | 1       | 0        | 1       | 0       |
| Sphingomonadaceae | 1              | 15             | 0       | 0        | 0        | 0       | 0       | 0       | 0        | 0        | 0       | 0       | 0       | 0       | 0        | 0       | 0        | 0        | 0       | 0        | 0       | 0       |
| Sphingomonas      | 2              | 220            | 0       | 1        | 0        | 1       | 1       | 0       | 1        | 0        | 1       | 0       | 1       | 1       | 1        | 1       | 1        | 0        | 1       | 1        | 1       | 1       |
| Sphingopyxis      | 3              | 99             | 1       | 1        | 0        | 1       | 0       | 0       | 0        | 0        | 1       | 0       | 1       | 0       | 1        | 1       | 1        | 0        | 1       | 0        | 1       | 0       |
| Spirochaeta       | 2              | 103            | 1       | 1        | 1        | 0       | 0       | 0       | 0        | 0        | 0       | 0       | 1       | 0       | 0        | 0       | 0        | 0        | 0       | 0        | 1       | 0       |
| Spiroplasma       | 1              | 6              | 0       | 0        | 0        | 0       | 0       | 0       | 0        | 0        | 0       | 0       | 0       | 0       | 0        | 0       | 0        | 0        | 0       | 0        | 0       | 0       |
| Spirosoma         | 2              | 107            | 1       | 1        | 1        | 1       | 0       | 0       | 0        | 0        | 0       | 0       | 1       | 0       | 1        | 1       | 1        | 0        | 0       | 0        | 1       | 0       |
| Stackebrandtia    | 2              | 110            | 0       | 0        | 1        | 1       | 0       | 0       | 1        | 0        | 0       | 0       | 0       | 0       | 1        | 0       | 1        | 0        | 1       | 0        | 1       | 0       |
| Stanieria         | 1              | 17             | 0       | 0        | 0        | 0       | 0       | 0       | 0        | 0        | 0       | 0       | 0       | 0       | 0        | 0       | 0        | 0        | 0       | 0        | 0       | 0       |
| Staphylococcus    | 2              | 108            | 1       | 1        | 1        | 1       | 0       | 0       | 0        | 0        | 0       | 0       | 1       | 1       | 0        | 0       | 0        | 0        | 0       | 0        | 1       | 1       |
| Staphylothermus   | 1              | 12             | 0       | 0        | 0        | 0       | 0       | 0       | 0        | 0        | 0       | 0       | 0       | 0       | 0        | 0       | 0        | 0        | 0       | 0        | 0       | 0       |

| Genus                  | Cluster Number | Protein Counts | 2.6.1.- | 2.7.1.21 | 2.7.1.48 | 2.7.4.- | 2.8.3.- | 2.8.3.1 | 2.8.3.12 | 2.8.3.15 | 2.8.3.6 | 2.8.3.8 | 3.1.1.- | 3.1.1.1 | 3.1.1.17 | 3.1.1.2 | 3.1.1.24 | 3.1.1.45 | 3.1.2.- | 3.1.2.23 | 3.1.3.1 | 3.1.3.2 |
|------------------------|----------------|----------------|---------|----------|----------|---------|---------|---------|----------|----------|---------|---------|---------|---------|----------|---------|----------|----------|---------|----------|---------|---------|
| Stappia                | 1              | 2              | 0       | 0        | 0        | 0       | 0       | 0       | 0        | 0        | 0       | 0       | 0       | 0       | 0        | 0       | 0        | 0        | 0       | 0        | 0       | 0       |
| Starkeya               | 3              | 134            | 0       | 0        | 0        | 1       | 0       | 0       | 1        | 0        | 0       | 0       | 1       | 1       | 1        | 1       | 1        | 0        | 1       | 0        | 1       | 0       |
| Stenotrophomonas       | 3              | 104            | 0       | 1        | 0        | 1       | 0       | 0       | 0        | 0        | 0       | 0       | 1       | 0       | 0        | 1       | 1        | 0        | 1       | 1        | 1       | 1       |
| Stigmatella            | 3              | 129            | 1       | 1        | 1        | 1       | 0       | 0       | 1        | 0        | 1       | 0       | 0       | 0       | 0        | 0       | 1        | 0        | 1       | 0        | 1       | 0       |
| Streptobacillus        | 1              | 38             | 1       | 1        | 1        | 1       | 0       | 0       | 0        | 0        | 0       | 0       | 1       | 0       | 0        | 0       | 0        | 0        | 0       | 0        | 0       | 0       |
| Streptococcus          | 2              | 121            | 1       | 1        | 1        | 1       | 1       | 0       | 0        | 0        | 0       | 1       | 1       | 1       | 0        | 0       | 1        | 0        | 0       | 0        | 0       | 1       |
| Streptomyces           | 2              | 253            | 1       | 1        | 1        | 1       | 1       | 0       | 1        | 0        | 1       | 0       | 1       | 0       | 1        | 0       | 1        | 0        | 1       | 0        | 1       | 0       |
| Streptosporangium      | 3              | 148            | 0       | 1        | 1        | 1       | 1       | 0       | 1        | 0        | 1       | 0       | 0       | 0       | 1        | 0       | 1        | 0        | 1       | 0        | 0       | 0       |
| Strigomonas            | 1              | 2              | 0       | 0        | 0        | 0       | 0       | 0       | 0        | 0        | 0       | 0       | 0       | 0       | 0        | 0       | 0        | 0        | 0       | 0        | 0       | 0       |
| Sulfitobacter          | 1              | 10             | 0       | 0        | 0        | 1       | 0       | 0       | 0        | 0        | 0       | 0       | 0       | 0       | 0        | 0       | 0        | 0        | 0       | 0        | 0       | 0       |
| Sulfobacillus          | 1              | 30             | 0       | 0        | 0        | 0       | 0       | 0       | 0        | 0        | 0       | 0       | 0       | 0       | 0        | 0       | 0        | 0        | 0       | 0        | 0       | 0       |
| Sulfolobus             | 1              | 23             | 0       | 0        | 0        | 0       | 0       | 0       | 0        | 0        | 0       | 0       | 0       | 0       | 0        | 0       | 0        | 0        | 0       | 0        | 0       | 0       |
| Sulfuricurvum          | 2              | 67             | 1       | 0        | 0        | 1       | 0       | 0       | 0        | 0        | 0       | 0       | 1       | 0       | 0        | 1       | 0        | 0        | 0       | 0        | 1       | 0       |
| Sulfurihydrogenibium   | 2              | 55             | 0       | 0        | 0        | 1       | 0       | 0       | 0        | 0        | 0       | 0       | 1       | 0       | 0        | 0       | 0        | 0        | 0       | 0        | 0       | 0       |
| Sulfurimonas           | 2              | 60             | 1       | 0        | 0        | 1       | 0       | 0       | 0        | 0        | 0       | 0       | 1       | 0       | 0        | 0       | 0        | 0        | 0       | 0        | 0       | 0       |
| Sulfurospirillum       | 1              | 48             | 1       | 0        | 0        | 1       | 0       | 0       | 0        | 0        | 0       | 0       | 1       | 0       | 0        | 0       | 0        | 0        | 0       | 0        | 1       | 0       |
| Sulfurovum             | 2              | 48             | 0       | 0        | 0        | 1       | 0       | 0       | 0        | 0        | 0       | 0       | 0       | 0       | 0        | 0       | 0        | 0        | 0       | 0        | 1       | 0       |
| Symbiobacterium        | 2              | 68             | 0       | 1        | 1        | 1       | 0       | 0       | 0        | 0        | 0       | 0       | 0       | 0       | 0        | 1       | 1        | 0        | 0       | 0        | 0       | 0       |
| Synechococcus          | 1              | 34             | 0       | 0        | 0        | 1       | 0       | 0       | 0        | 0        | 0       | 0       | 0       | 0       | 0        | 0       | 0        | 0        | 0       | 0        | 0       | 0       |
| Synechocystis          | 1              | 40             | 0       | 0        | 0        | 1       | 0       | 0       | 0        | 0        | 0       | 0       | 0       | 0       | 0        | 0       | 0        | 0        | 0       | 0        | 0       | 0       |
| Synergistetes          | 1              | 27             | 0       | 0        | 1        | 1       | 0       | 0       | 0        | 0        | 1       | 0       | 0       | 0       | 0        | 0       | 0        | 0        | 0       | 0        | 0       | 0       |
| Syntrophobacter        | 2              | 101            | 1       | 0        | 0        | 1       | 0       | 0       | 1        | 0        | 1       | 1       | 1       | 0       | 0        | 1       | 1        | 0        | 0       | 0        | 0       | 0       |
| Syntrophobotulus       | 2              | 71             | 1       | 0        | 0        | 1       | 0       | 0       | 0        | 0        | 0       | 0       | 1       | 1       | 0        | 0       | 1        | 0        | 0       | 0        | 1       | 0       |
| Syntrophomonas         | 2              | 58             | 1       | 1        | 1        | 1       | 0       | 0       | 0        | 0        | 1       | 0       | 0       | 0       | 0        | 0       | 0        | 0        | 0       | 0        | 0       | 0       |
| Syntrophothermus       | 2              | 60             | 0       | 0        | 0        | 1       | 0       | 0       | 1        | 0        | 1       | 0       | 0       | 1       | 0        | 0       | 0        | 0        | 0       | 0        | 0       | 0       |
| Syntrophus             | 2              | 66             | 1       | 0        | 0        | 1       | 0       | 0       | 0        | 0        | 0       | 1       | 0       | 0       | 0        | 0       | 0        | 0        | 0       | 0        | 0       | 0       |
| Tannerella             | 1              | 8              | 0       | 0        | 0        | 0       | 0       | 0       | 0        | 0        | 0       | 0       | 0       | 0       | 0        | 0       | 0        | 0        | 0       | 0        | 0       | 0       |
| Taylorella             | 1              | 43             | 0       | 0        | 0        | 1       | 0       | 0       | 0        | 0        | 0       | 0       | 1       | 0       | 0        | 0       | 0        | 0        | 0       | 0        | 1       | 0       |
| Tepidanaerobacter      | 2              | 55             | 0       | 0        | 1        | 1       | 0       | 0       | 0        | 0        | 0       | 1       | 0       | 0       | 0        | 0       | 0        | 0        | 0       | 0        | 1       | 0       |
| Teredinibacter         | 2              | 109            | 0       | 0        | 0        | 1       | 0       | 0       | 0        | 0        | 0       | 0       | 0       | 0       | 1        | 1       | 0        | 0        | 1       | 0        | 1       | 0       |
| Terrabacter            | 1              | 1              | 0       | 0        | 0        | 0       | 0       | 0       | 0        | 0        | 0       | 0       | 0       | 0       | 0        | 0       | 0        | 0        | 0       | 0        | 0       | 0       |
| Terriglobus            | 2              | 83             | 0       | 1        | 1        | 1       | 0       | 0       | 0        | 0        | 0       | 0       | 1       | 0       | 1        | 1       | 0        | 0        | 0       | 0        | 1       | 1       |
| Tetragenococcus        | 1              | 12             | 0       | 0        | 0        | 0       | 0       | 0       | 0        | 0        | 0       | 0       | 0       | 0       | 0        | 0       | 0        | 0        | 0       | 0        | 0       | 0       |
| Thalassiobium          | 1              | 11             | 0       | 0        | 0        | 1       | 0       | 0       | 0        | 0        | 0       | 0       | 0       | 0       | 0        | 0       | 0        | 0        | 0       | 0        | 0       | 0       |
| Thalassobacter         | 1              | 9              | 0       | 0        | 0        | 1       | 0       | 0       | 0        | 0        | 0       | 0       | 0       | 0       | 0        | 0       | 0        | 0        | 0       | 0        | 0       | 0       |
| Thalassolituus         | 1              | 12             | 0       | 0        | 0        | 0       | 0       | 0       | 0        | 0        | 0       | 0       | 0       | 0       | 0        | 0       | 0        | 0        | 0       | 0        | 0       | 0       |
| Thalassospira          | 1              | 2              | 0       | 0        | 0        | 0       | 0       | 0       | 0        | 0        | 0       | 0       | 0       | 0       | 0        | 0       | 0        | 0        | 0       | 0        | 0       | 0       |
| Thauera                | 1              | 111            | 0       | 0        | 0        | 1       | 0       | 0       | 0        | 0        | 0       | 1       | 0       | 0       | 0        | 0       | 0        | 0        | 0       | 0        | 1       | 0       |
| Thermacetogenium       | 1              | 7              | 0       | 0        | 0        | 0       | 0       | 0       | 0        | 0        | 0       | 0       | 0       | 0       | 0        | 0       | 0        | 0        | 0       | 0        | 0       | 0       |
| Thermaerobacter        | 2              | 79             | 0       | 1        | 1        | 1       | 0       | 0       | 0        | 0        | 0       | 0       | 0       | 1       | 0        | 0       | 0        | 0        | 0       | 0        | 0       | 0       |
| Thermanaerovibrio      | 2              | 58             | 1       | 0        | 1        | 1       | 0       | 0       | 0        | 0        | 0       | 0       | 1       | 0       | 0        | 0       | 0        | 0        | 0       | 0        | 1       | 0       |
| Thermincola            | 2              | 62             | 0       | 0        | 0        | 1       | 0       | 0       | 0        | 0        | 0       | 0       | 0       | 0       | 0        | 0       | 0        | 0        | 0       | 0        | 0       | 0       |
| Thermoanaerobacter     | 2              | 76             | 1       | 1        | 1        | 1       | 0       | 0       | 0        | 0        | 0       | 0       | 1       | 0       | 0        | 0       | 0        | 0        | 0       | 0        | 0       | 0       |
| Thermoanaerobacterium  | 2              | 64             | 1       | 1        | 1        | 1       | 0       | 0       | 0        | 0        | 0       | 0       | 0       | 0       | 0        | 0       | 0        | 0        | 0       | 0        | 0       | 0       |
| Thermobacillus         | 1              | 11             | 0       | 0        | 0        | 0       | 0       | 0       | 0        | 0        | 0       | 0       | 0       | 0       | 0        | 0       | 0        | 0        | 0       | 0        | 0       | 0       |
| Thermobaculum          | 2              | 62             | 1       | 0        | 0        | 1       | 0       | 0       | 0        | 0        | 0       | 0       | 1       | 0       | 0        | 0       | 0        | 0        | 0       | 0        | 1       | 1       |
| Thermobifida           | 2              | 72             | 0       | 0        | 0        | 1       | 0       | 0       | 0        | 0        | 0       | 0       | 1       | 0       | 0        | 0       | 1        | 0        | 1       | 0        | 0       | 0       |
| Thermobispora          | 2              | 109            | 0       | 0        | 0        | 1       | 0       | 0       | 1        | 0        | 1       | 0       | 1       | 0       | 0        | 0       | 1        | 0        | 1       | 0        | 0       | 0       |
| Thermococcus           | 1              | 13             | 0       | 0        | 0        | 0       | 0       | 0       | 0        | 0        | 0       | 0       | 0       | 0       | 0        | 0       | 0        | 0        | 0       | 0        | 0       | 0       |
| Thermocrinis           | 2              | 60             | 0       | 1        | 0        | 1       | 0       | 0       | 0        | 0        | 0       | 0       | 0       | 0       | 0        | 0       | 0        | 0        | 0       | 0        | 0       | 0       |
| Thermodesulfator       | 1              | 10             | 0       | 0        | 0        | 0       | 0       | 0       | 0        | 0        | 0       | 0       | 0       | 0       | 0        | 0       | 0        | 0        | 0       | 0        | 0       | 0       |
| Thermodesulfobacterium | 1              | 9              | 0       | 0        | 0        | 0       | 0       | 0       | 0        | 0        | 0       | 0       | 0       | 0       | 0        | 0       | 0        | 0        | 0       | 0        | 0       | 0       |

| Genus                       | Cluster Number | Protein Counts | 2.6.1.- | 2.7.1.21 | 2.7.1.48 | 2.7.4.- | 2.8.3.- | 2.8.3.1 | 2.8.3.12 | 2.8.3.15 | 2.8.3.6 | 2.8.3.8 | 3.1.1.- | 3.1.1.1 | 3.1.1.17 | 3.1.1.2 | 3.1.1.24 | 3.1.1.45 | 3.1.2.- | 3.1.2.23 | 3.1.3.1 | 3.1.3.2 |
|-----------------------------|----------------|----------------|---------|----------|----------|---------|---------|---------|----------|----------|---------|---------|---------|---------|----------|---------|----------|----------|---------|----------|---------|---------|
| <b>Thermodesulfobium</b>    | 1              | 13             | 0       | 0        | 0        | 0       | 0       | 0       | 0        | 0        | 0       | 0       | 0       | 0       | 0        | 0       | 0        | 0        | 0       | 0        | 0       | 0       |
| <b>Thermodesulfobivrio</b>  | 2              | 60             | 1       | 0        | 0        | 1       | 0       | 0       | 0        | 0        | 0       | 0       | 0       | 0       | 0        | 0       | 0        | 0        | 0       | 0        | 1       | 0       |
| <b>Thermofilum</b>          | 1              | 9              | 0       | 0        | 0        | 0       | 0       | 0       | 0        | 0        | 0       | 0       | 0       | 0       | 0        | 0       | 0        | 0        | 0       | 0        | 0       | 0       |
| <b>Thermogladus</b>         | 1              | 7              | 0       | 0        | 0        | 0       | 0       | 0       | 0        | 0        | 0       | 0       | 0       | 0       | 0        | 0       | 0        | 0        | 0       | 0        | 0       | 0       |
| <b>Thermomicrobium</b>      | 2              | 92             | 0       | 0        | 0        | 1       | 0       | 0       | 0        | 0        | 1       | 0       | 0       | 0       | 1        | 0       | 1        | 0        | 0       | 0        | 1       | 0       |
| <b>Thermomonospora</b>      | 2              | 125            | 0       | 0        | 1        | 1       | 1       | 0       | 1        | 0        | 0       | 0       | 0       | 0       | 0        | 0       | 1        | 0        | 1       | 0        | 0       | 0       |
| <b>Thermoplasma</b>         | 1              | 11             | 0       | 0        | 0        | 0       | 0       | 0       | 0        | 0        | 0       | 0       | 0       | 0       | 0        | 0       | 0        | 0        | 0       | 0        | 0       | 0       |
| <b>Thermoplasmatales</b>    | 1              | 6              | 0       | 0        | 0        | 0       | 0       | 0       | 0        | 0        | 0       | 0       | 0       | 0       | 0        | 0       | 0        | 0        | 0       | 0        | 0       | 0       |
| <b>Thermoproteus</b>        | 1              | 12             | 0       | 0        | 0        | 0       | 0       | 0       | 0        | 0        | 0       | 0       | 0       | 0       | 0        | 0       | 0        | 0        | 0       | 0        | 0       | 0       |
| <b>Thermosediminibacter</b> | 2              | 64             | 1       | 0        | 1        | 1       | 0       | 0       | 0        | 0        | 0       | 0       | 0       | 0       | 0        | 0       | 0        | 0        | 0       | 0        | 0       | 0       |
| <b>Thermosipho</b>          | 2              | 70             | 0       | 1        | 1        | 1       | 0       | 0       | 0        | 0        | 0       | 1       | 0       | 1       | 0        | 0       | 0        | 0        | 0       | 0        | 1       | 0       |
| <b>Thermosphaera</b>        | 1              | 10             | 0       | 0        | 0        | 0       | 0       | 0       | 0        | 0        | 0       | 0       | 0       | 0       | 0        | 0       | 0        | 0        | 0       | 0        | 0       | 0       |
| <b>Thermosynechococcus</b>  | 1              | 6              | 0       | 0        | 0        | 0       | 0       | 0       | 0        | 0        | 0       | 0       | 0       | 0       | 0        | 0       | 0        | 0        | 0       | 0        | 0       | 0       |
| <b>Thermotoga</b>           | 2              | 80             | 0       | 1        | 1        | 1       | 0       | 0       | 0        | 0        | 0       | 0       | 0       | 1       | 0        | 0       | 1        | 0        | 0       | 0        | 1       | 0       |
| <b>Thermovibrio</b>         | 2              | 58             | 0       | 0        | 0        | 1       | 0       | 0       | 0        | 0        | 0       | 0       | 1       | 0       | 0        | 0       | 0        | 0        | 0       | 0        | 0       | 0       |
| <b>Thermovirga</b>          | 1              | 9              | 0       | 0        | 0        | 0       | 0       | 0       | 0        | 0        | 0       | 0       | 0       | 0       | 0        | 0       | 0        | 0        | 0       | 0        | 0       | 0       |
| <b>Thermus</b>              | 2              | 107            | 1       | 1        | 1        | 1       | 0       | 0       | 0        | 0        | 0       | 0       | 0       | 0       | 0        | 0       | 1        | 0        | 0       | 0        | 1       | 0       |
| <b>Thioalkalimicrobium</b>  | 1              | 4              | 0       | 0        | 0        | 0       | 0       | 0       | 0        | 0        | 0       | 0       | 0       | 0       | 0        | 0       | 0        | 0        | 0       | 0        | 0       | 0       |
| <b>Thioalkalivibrio</b>     | 2              | 91             | 0       | 0        | 0        | 1       | 0       | 0       | 0        | 0        | 0       | 0       | 1       | 0       | 0        | 1       | 0        | 0        | 0       | 0        | 1       | 0       |
| <b>Thiobaca</b>             | 1              | 2              | 0       | 0        | 0        | 0       | 0       | 0       | 0        | 0        | 0       | 0       | 0       | 0       | 0        | 0       | 0        | 0        | 0       | 0        | 0       | 0       |
| <b>Thiobacillus</b>         | 2              | 67             | 0       | 0        | 0        | 1       | 0       | 0       | 0        | 0        | 0       | 0       | 1       | 0       | 0        | 1       | 0        | 0        | 0       | 0        | 0       | 0       |
| <b>Thiocapsa</b>            | 1              | 2              | 0       | 0        | 0        | 0       | 0       | 0       | 0        | 0        | 0       | 0       | 0       | 0       | 0        | 0       | 0        | 0        | 0       | 0        | 0       | 0       |
| <b>Thiocystis</b>           | 1              | 11             | 0       | 0        | 0        | 0       | 0       | 0       | 0        | 0        | 0       | 0       | 0       | 0       | 0        | 0       | 0        | 0        | 0       | 0        | 0       | 0       |
| <b>Thioflavococcus</b>      | 1              | 13             | 0       | 0        | 0        | 0       | 0       | 0       | 0        | 0        | 0       | 0       | 0       | 0       | 0        | 0       | 0        | 0        | 0       | 0        | 0       | 0       |
| <b>Thiomicrospira</b>       | 2              | 50             | 0       | 0        | 0        | 1       | 0       | 0       | 0        | 0        | 0       | 0       | 1       | 0       | 0        | 1       | 0        | 0        | 0       | 0        | 1       | 0       |
| <b>Thiomonas</b>            | 2              | 85             | 1       | 0        | 0        | 1       | 0       | 0       | 0        | 0        | 0       | 0       | 1       | 0       | 0        | 1       | 0        | 0        | 0       | 0        | 1       | 0       |
| <b>Thiorhodococcus</b>      | 1              | 2              | 0       | 0        | 0        | 0       | 0       | 0       | 0        | 0        | 0       | 0       | 0       | 0       | 0        | 0       | 0        | 0        | 0       | 0        | 0       | 0       |
| <b>Thiothrix</b>            | 1              | 2              | 0       | 0        | 0        | 0       | 0       | 0       | 0        | 0        | 0       | 0       | 0       | 0       | 0        | 0       | 0        | 0        | 0       | 0        | 0       | 0       |
| <b>Tistrella</b>            | 1              | 42             | 0       | 0        | 0        | 0       | 0       | 0       | 0        | 0        | 0       | 0       | 0       | 0       | 0        | 0       | 0        | 0        | 0       | 0        | 0       | 0       |
| <b>Tolumonas</b>            | 2              | 100            | 0       | 0        | 1        | 1       | 0       | 0       | 0        | 0        | 0       | 0       | 1       | 0       | 1        | 1       | 0        | 0        | 0       | 0        | 1       | 0       |
| <b>Transposon</b>           | 1              | 2              | 0       | 0        | 0        | 0       | 0       | 0       | 0        | 0        | 0       | 0       | 0       | 0       | 0        | 0       | 0        | 0        | 0       | 0        | 0       | 0       |
| <b>Treponema</b>            | 1              | 63             | 1       | 0        | 1        | 0       | 0       | 0       | 0        | 0        | 0       | 0       | 0       | 1       | 0        | 0       | 0        | 0        | 0       | 0        | 1       | 0       |
| <b>Trichodesmium</b>        | 2              | 71             | 0       | 0        | 1        | 1       | 0       | 0       | 0        | 0        | 0       | 0       | 0       | 0       | 0        | 1       | 0        | 0        | 0       | 0        | 1       | 0       |
| <b>Trichormus</b>           | 1              | 12             | 0       | 0        | 0        | 1       | 0       | 0       | 0        | 0        | 0       | 0       | 0       | 0       | 0        | 0       | 0        | 0        | 0       | 0        | 0       | 0       |
| <b>Tropheryma</b>           | 2              | 22             | 0       | 0        | 0        | 1       | 0       | 0       | 0        | 0        | 0       | 0       | 0       | 0       | 0        | 0       | 0        | 0        | 0       | 0        | 0       | 0       |
| <b>Truepera</b>             | 2              | 104            | 1       | 1        | 1        | 1       | 0       | 0       | 0        | 0        | 0       | 0       | 0       | 0       | 1        | 0       | 1        | 0        | 0       | 0        | 1       | 0       |
| <b>Tsukamurella</b>         | 2              | 123            | 0       | 0        | 0        | 1       | 1       | 0       | 0        | 0        | 1       | 1       | 1       | 0       | 0        | 0       | 1        | 0        | 1       | 0        | 1       | 0       |
| <b>Turneriella</b>          | 1              | 16             | 0       | 0        | 0        | 0       | 0       | 0       | 0        | 0        | 0       | 0       | 0       | 0       | 0        | 0       | 0        | 0        | 0       | 0        | 0       | 0       |
| <b>Uliginosibacterium</b>   | 1              | 2              | 0       | 0        | 0        | 0       | 0       | 0       | 0        | 0        | 0       | 0       | 0       | 0       | 0        | 0       | 0        | 0        | 0       | 0        | 0       | 0       |
| <b>Ureaplasma</b>           | 1              | 24             | 0       | 1        | 1        | 1       | 0       | 0       | 0        | 0        | 0       | 0       | 0       | 0       | 0        | 0       | 0        | 0        | 0       | 0        | 0       | 0       |
| <b>Ureibacillus</b>         | 1              | 2              | 0       | 0        | 0        | 1       | 0       | 0       | 0        | 0        | 0       | 0       | 0       | 0       | 0        | 0       | 0        | 0        | 0       | 0        | 0       | 0       |
| <b>Variovorax</b>           | 3              | 187            | 0       | 0        | 0        | 1       | 0       | 0       | 0        | 0        | 1       | 0       | 1       | 0       | 1        | 1       | 1        | 0        | 1       | 1        | 1       | 0       |
| <b>Veillonella</b>          | 1              | 54             | 1       | 0        | 0        | 1       | 0       | 0       | 0        | 0        | 0       | 0       | 1       | 0       | 0        | 0       | 0        | 0        | 0       | 0        | 0       | 0       |
| <b>Verminephrobacter</b>    | 3              | 188            | 1       | 0        | 0        | 1       | 0       | 1       | 1        | 0        | 1       | 1       | 1       | 1       | 1        | 0       | 0        | 0        | 1       | 0        | 0       | 0       |
| <b>Verrucosispora</b>       | 3              | 126            | 0       | 1        | 1        | 1       | 0       | 0       | 1        | 0        | 1       | 0       | 1       | 0       | 0        | 0       | 1        | 0        | 1       | 0        | 1       | 0       |
| <b>Vibrio</b>               | 2              | 195            | 1       | 1        | 1        | 1       | 0       | 0       | 0        | 0        | 0       | 1       | 1       | 0       | 0        | 1       | 1        | 0        | 1       | 0        | 1       | 0       |
| <b>Vibrionales</b>          | 1              | 46             | 0       | 1        | 1        | 1       | 0       | 0       | 0        | 0        | 0       | 0       | 1       | 0       | 0        | 0       | 0        | 0        | 1       | 0        | 0       | 0       |
| <b>Vitreoscilla</b>         | 1              | 1              | 0       | 0        | 0        | 0       | 0       | 0       | 0        | 0        | 0       | 0       | 0       | 0       | 0        | 0       | 0        | 0        | 0       | 0        | 0       | 0       |
| <b>Vulcanisaeta</b>         | 1              | 14             | 0       | 0        | 0        | 0       | 0       | 0       | 0        | 0        | 0       | 0       | 0       | 0       | 0        | 0       | 0        | 0        | 0       | 0        | 0       | 0       |
| <b>Waddlia</b>              | 2              | 68             | 1       | 1        | 1        | 1       | 0       | 0       | 1        | 0        | 0       | 0       | 0       | 1       | 0        | 0       | 0        | 0        | 0       | 0        | 1       | 0       |
| <b>Wautersia</b>            | 1              | 2              | 0       | 0        | 0        | 0       | 0       | 0       | 0        | 0        | 0       | 0       | 0       | 0       | 0        | 0       | 0        | 0        | 0       | 0        | 0       | 0       |
| <b>Weeksella</b>            | 2              | 65             | 0       | 1        | 1        | 1       | 0       | 0       | 0        | 0        | 0       | 0       | 0       | 1       | 0        | 0       | 0        | 0        | 1       | 0        | 1       | 0       |

| Genus             | Cluster Number | Protein Counts | 2.6.1.- | 2.7.1.21 | 2.7.1.48 | 2.7.4.- | 2.8.3.- | 2.8.3.1 | 2.8.3.12 | 2.8.3.15 | 2.8.3.6 | 2.8.3.8 | 3.1.1.- | 3.1.1.1 | 3.1.1.17 | 3.1.1.2 | 3.1.1.24 | 3.1.1.45 | 3.1.2.- | 3.1.2.23 | 3.1.3.1 | 3.1.3.2 |
|-------------------|----------------|----------------|---------|----------|----------|---------|---------|---------|----------|----------|---------|---------|---------|---------|----------|---------|----------|----------|---------|----------|---------|---------|
| Weissella         | 1              | 14             | 0       | 0        | 0        | 0       | 0       | 0       | 0        | 0        | 0       | 0       | 0       | 0       | 0        | 0       | 0        | 0        | 0       | 0        | 0       | 0       |
| Wenxinia          | 1              | 2              | 0       | 0        | 0        | 0       | 0       | 0       | 0        | 0        | 0       | 0       | 0       | 0       | 0        | 0       | 0        | 0        | 0       | 0        | 0       | 0       |
| Wigglesworthia    | 1              | 29             | 0       | 0        | 0        | 1       | 0       | 0       | 0        | 0        | 0       | 0       | 0       | 0       | 0        | 0       | 0        | 0        | 0       | 0        | 0       | 0       |
| Wolbachia         | 1              | 32             | 0       | 0        | 0        | 1       | 0       | 0       | 0        | 0        | 0       | 0       | 1       | 0       | 0        | 0       | 0        | 0        | 0       | 0        | 0       | 0       |
| Wolinella         | 2              | 51             | 0       | 0        | 0        | 1       | 0       | 0       | 0        | 0        | 0       | 0       | 1       | 0       | 0        | 0       | 0        | 0        | 0       | 0        | 0       | 0       |
| Xanthobacter      | 3              | 176            | 0       | 0        | 0        | 1       | 0       | 0       | 1        | 0        | 1       | 0       | 1       | 1       | 1        | 1       | 1        | 0        | 1       | 0        | 0       | 0       |
| Xanthobacteraceae | 1              | 4              | 0       | 0        | 0        | 0       | 0       | 0       | 0        | 0        | 0       | 0       | 0       | 0       | 0        | 0       | 0        | 0        | 0       | 0        | 0       | 0       |
| Xanthomonadaceae  | 1              | 39             | 0       | 0        | 0        | 1       | 0       | 0       | 0        | 0        | 0       | 0       | 0       | 0       | 0        | 0       | 0        | 0        | 1       | 1        | 0       | 1       |
| Xanthomonas       | 2              | 162            | 0       | 1        | 0        | 1       | 0       | 0       | 1        | 0        | 1       | 1       | 1       | 0       | 1        | 1       | 1        | 0        | 1       | 1        | 1       | 1       |
| Xenorhabdus       | 2              | 127            | 1       | 1        | 1        | 1       | 0       | 0       | 0        | 0        | 0       | 0       | 1       | 0       | 0        | 1       | 0        | 0        | 1       | 0        | 0       | 1       |
| Xylanimonas       | 2              | 66             | 0       | 1        | 0        | 1       | 0       | 0       | 0        | 0        | 0       | 0       | 0       | 0       | 0        | 0       | 1        | 0        | 1       | 0        | 0       | 0       |
| Xylella           | 2              | 52             | 0       | 0        | 0        | 1       | 0       | 0       | 0        | 0        | 0       | 0       | 0       | 0       | 1        | 0       | 0        | 0        | 1       | 0        | 1       | 0       |
| Yersinia          | 2              | 145            | 1       | 1        | 1        | 1       | 0       | 0       | 0        | 0        | 0       | 0       | 1       | 0       | 0        | 1       | 0        | 1        | 1       | 0        | 1       | 1       |
| Yokenella         | 2              | 61             | 0       | 0        | 1        | 1       | 0       | 0       | 0        | 0        | 0       | 0       | 1       | 0       | 0        | 0       | 0        | 0        | 1       | 0        | 0       | 0       |
| Zobellia          | 1              | 28             | 0       | 0        | 0        | 0       | 0       | 0       | 0        | 0        | 0       | 0       | 0       | 0       | 0        | 0       | 0        | 0        | 0       | 0        | 0       | 0       |
| Zunongwangia      | 2              | 98             | 0       | 1        | 1        | 1       | 0       | 0       | 0        | 0        | 0       | 0       | 1       | 1       | 1        | 1       | 1        | 0        | 0       | 0        | 1       | 0       |
| Zymomonas         | 2              | 67             | 0       | 1        | 0        | 1       | 0       | 0       | 0        | 0        | 0       | 0       | 1       | 0       | 1        | 0       | 1        | 0        | 0       | 0        | 1       | 1       |
| Zymophilus        | 1              | 2              | 0       | 0        | 0        | 0       | 0       | 0       | 0        | 0        | 0       | 0       | 0       | 0       | 0        | 0       | 0        | 0        | 0       | 0        | 0       | 0       |

| Genus               | Cluster Number | Protein Counts | 3.1.3.41 | 3.1.8.1 | 3.2.1.31 | 3.3.2.10 | 3.3.2.9 | 3.5.1.- | 3.5.1.4 | 3.5.1.5 | 3.5.1.54 | 3.5.1.6 | 3.5.2.- | 3.5.2.15 | 3.5.2.2 | 3.5.4.- | 3.5.4.5 | 3.5.5.1 | 3.5.5.7 | 3.5.99.3 | 3.6.1.7 | 3.7.1.- |
|---------------------|----------------|----------------|----------|---------|----------|----------|---------|---------|---------|---------|----------|---------|---------|----------|---------|---------|---------|---------|---------|----------|---------|---------|
| Acaricomes          | 1              | 2              | 0        | 0       | 0        | 0        | 0       | 0       | 0       | 0       | 0        | 0       | 0       | 0        | 0       | 0       | 0       | 0       | 0       | 0        | 0       | 0       |
| Acaryochloris       | 2              | 88             | 0        | 0       | 0        | 0        | 1       | 0       | 1       | 1       | 0        | 0       | 0       | 0        | 0       | 1       | 0       | 0       | 1       | 0        | 1       | 0       |
| Acetivibrio         | 1              | 2              | 0        | 0       | 0        | 0        | 0       | 0       | 0       | 0       | 0        | 0       | 0       | 0        | 0       | 0       | 0       | 0       | 0       | 0        | 0       | 0       |
| Acetobacter         | 2              | 85             | 0        | 0       | 0        | 0        | 0       | 0       | 0       | 1       | 1        | 1       | 0       | 0        | 1       | 1       | 0       | 0       | 1       | 1        | 0       | 0       |
| Acetobacteraceae    | 1              | 2              | 0        | 0       | 0        | 0        | 0       | 0       | 0       | 1       | 0        | 0       | 0       | 0        | 0       | 0       | 0       | 0       | 0       | 0        | 0       | 0       |
| Acetobacterium      | 1              | 8              | 0        | 0       | 0        | 0        | 0       | 0       | 0       | 0       | 0        | 0       | 0       | 0        | 0       | 0       | 0       | 0       | 0       | 0        | 0       | 0       |
| Acetohalobium       | 2              | 79             | 0        | 0       | 0        | 0        | 0       | 1       | 0       | 0       | 1        | 0       | 0       | 0        | 0       | 1       | 1       | 0       | 0       | 0        | 0       | 1       |
| Acholeplasma        | 2              | 38             | 0        | 0       | 0        | 0        | 0       | 0       | 0       | 0       | 0        | 0       | 0       | 0        | 0       | 1       | 1       | 0       | 0       | 0        | 0       | 0       |
| Achromobacter       | 2              | 192            | 0        | 0       | 0        | 0        | 1       | 1       | 1       | 0       | 1        | 1       | 0       | 0        | 0       | 1       | 0       | 1       | 0       | 0        | 1       | 1       |
| Acidaminococcus     | 1              | 65             | 0        | 0       | 0        | 0        | 0       | 0       | 0       | 0       | 1        | 0       | 0       | 0        | 0       | 1       | 1       | 1       | 0       | 0        | 0       | 0       |
| Acidianus           | 1              | 9              | 0        | 0       | 0        | 0        | 0       | 0       | 0       | 0       | 0        | 0       | 0       | 0        | 0       | 0       | 0       | 0       | 0       | 0        | 0       | 0       |
| Acidilobus          | 1              | 8              | 0        | 0       | 0        | 0        | 0       | 0       | 0       | 0       | 0        | 0       | 0       | 0        | 0       | 0       | 0       | 0       | 0       | 0        | 0       | 0       |
| Acidimicrobium      | 2              | 58             | 1        | 0       | 0        | 0        | 0       | 0       | 0       | 0       | 0        | 0       | 0       | 0        | 0       | 1       | 0       | 0       | 0       | 0        | 0       | 0       |
| Acidiphilium        | 3              | 144            | 0        | 0       | 0        | 0        | 0       | 1       | 0       | 0       | 1        | 1       | 0       | 0        | 0       | 1       | 0       | 0       | 0       | 0        | 0       | 1       |
| Acidithiobacillus   | 2              | 70             | 0        | 0       | 0        | 0        | 0       | 1       | 0       | 0       | 0        | 0       | 0       | 0        | 0       | 1       | 0       | 0       | 0       | 0        | 0       | 0       |
| Acidobacterium      | 2              | 91             | 0        | 0       | 0        | 0        | 0       | 1       | 0       | 0       | 0        | 0       | 0       | 0        | 0       | 1       | 1       | 0       | 0       | 0        | 1       | 0       |
| Acidocella          | 1              | 2              | 0        | 0       | 0        | 0        | 0       | 0       | 0       | 1       | 0        | 0       | 0       | 0        | 0       | 0       | 0       | 0       | 0       | 0        | 0       | 0       |
| Acidothermus        | 2              | 68             | 1        | 0       | 0        | 0        | 1       | 0       | 0       | 0       | 1        | 0       | 0       | 0        | 0       | 1       | 0       | 0       | 1       | 0        | 1       | 1       |
| Acidovorax          | 3              | 217            | 0        | 0       | 0        | 0        | 0       | 1       | 1       | 1       | 1        | 1       | 0       | 0        | 1       | 1       | 0       | 1       | 0       | 1        | 1       | 1       |
| Aciduliprofundum    | 1              | 11             | 0        | 0       | 0        | 0        | 0       | 0       | 0       | 0       | 0        | 0       | 0       | 0        | 0       | 0       | 0       | 0       | 0       | 0        | 0       | 0       |
| Acinetobacter       | 3              | 188            | 0        | 0       | 0        | 0        | 1       | 1       | 1       | 1       | 1        | 0       | 0       | 0        | 0       | 1       | 0       | 0       | 0       | 1        | 0       | 0       |
| Actinobacillus      | 2              | 112            | 0        | 0       | 0        | 0        | 0       | 0       | 0       | 1       | 0        | 0       | 0       | 0        | 0       | 1       | 1       | 0       | 0       | 0        | 1       | 0       |
| Actinomadura        | 1              | 1              | 0        | 0       | 0        | 0        | 1       | 0       | 0       | 0       | 0        | 0       | 0       | 0        | 0       | 0       | 0       | 0       | 0       | 0        | 0       | 0       |
| Actinoplanes        | 1              | 52             | 0        | 0       | 0        | 0        | 0       | 0       | 0       | 0       | 0        | 0       | 0       | 0        | 0       | 0       | 0       | 0       | 0       | 0        | 0       | 0       |
| Actinopolyspora     | 1              | 2              | 0        | 0       | 0        | 0        | 0       | 0       | 0       | 0       | 0        | 0       | 0       | 0        | 0       | 0       | 0       | 0       | 0       | 0        | 0       | 0       |
| Actinosynnema       | 2              | 122            | 1        | 0       | 0        | 0        | 1       | 1       | 1       | 1       | 1        | 0       | 0       | 0        | 1       | 1       | 1       | 0       | 0       | 0        | 1       | 1       |
| Advenella           | 1              | 30             | 0        | 0       | 0        | 0        | 0       | 0       | 0       | 0       | 0        | 0       | 0       | 0        | 0       | 0       | 0       | 0       | 0       | 0        | 0       | 0       |
| Aequorivita         | 1              | 12             | 0        | 0       | 0        | 0        | 0       | 0       | 0       | 0       | 0        | 0       | 0       | 0        | 0       | 0       | 0       | 0       | 0       | 0        | 0       | 0       |
| Aerococcus          | 2              | 57             | 0        | 0       | 1        | 0        | 0       | 1       | 1       | 0       | 0        | 0       | 0       | 0        | 0       | 1       | 1       | 0       | 0       | 0        | 0       | 0       |
| Aeromonas           | 2              | 127            | 0        | 0       | 0        | 0        | 0       | 0       | 0       | 0       | 0        | 0       | 0       | 0        | 0       | 1       | 1       | 0       | 0       | 0        | 1       | 0       |
| Aeropyrum           | 1              | 13             | 0        | 0       | 0        | 0        | 0       | 0       | 0       | 0       | 0        | 0       | 0       | 0        | 0       | 0       | 0       | 0       | 0       | 0        | 0       | 0       |
| Afipia              | 1              | 54             | 0        | 0       | 0        | 0        | 0       | 0       | 0       | 1       | 0        | 0       | 0       | 0        | 0       | 0       | 0       | 0       | 0       | 0        | 0       | 0       |
| Aggregatibacter     | 1              | 81             | 0        | 0       | 0        | 0        | 0       | 1       | 0       | 0       | 0        | 0       | 0       | 0        | 0       | 1       | 1       | 0       | 0       | 0        | 1       | 1       |
| Agrobacterium       | 2              | 242            | 0        | 0       | 0        | 0        | 1       | 1       | 1       | 1       | 1        | 1       | 0       | 1        | 1       | 1       | 1       | 1       | 1       | 0        | 1       | 1       |
| Ahrensia            | 1              | 2              | 0        | 0       | 0        | 0        | 0       | 0       | 0       | 1       | 0        | 0       | 0       | 0        | 0       | 0       | 0       | 0       | 0       | 0        | 0       | 0       |
| Akkermansia         | 2              | 47             | 0        | 0       | 0        | 0        | 0       | 0       | 0       | 0       | 0        | 0       | 0       | 0        | 0       | 1       | 0       | 0       | 0       | 0        | 0       | 0       |
| Albidiferax         | 3              | 144            | 0        | 0       | 0        | 0        | 0       | 1       | 0       | 1       | 1        | 1       | 0       | 0        | 0       | 0       | 0       | 0       | 0       | 0        | 1       | 0       |
| Alcaligenes         | 1              | 21             | 0        | 0       | 0        | 0        | 0       | 0       | 0       | 0       | 0        | 0       | 0       | 0        | 0       | 0       | 0       | 0       | 0       | 0        | 0       | 0       |
| Alcanivorax         | 2              | 146            | 0        | 0       | 0        | 0        | 1       | 0       | 1       | 1       | 1        | 0       | 0       | 0        | 0       | 1       | 0       | 0       | 0       | 0        | 1       | 1       |
| Alicyclophilus      | 3              | 152            | 0        | 0       | 0        | 0        | 0       | 1       | 0       | 0       | 1        | 1       | 0       | 0        | 0       | 0       | 0       | 0       | 0       | 0        | 1       | 1       |
| Alicyclobacillus    | 2              | 91             | 0        | 0       | 0        | 0        | 0       | 1       | 1       | 0       | 1        | 0       | 0       | 0        | 0       | 1       | 1       | 0       | 0       | 0        | 0       | 0       |
| Aliivibrio          | 2              | 118            | 0        | 0       | 0        | 0        | 0       | 0       | 0       | 1       | 1        | 0       | 0       | 0        | 0       | 1       | 1       | 0       | 0       | 0        | 1       | 1       |
| Alishewanella       | 1              | 1              | 0        | 0       | 0        | 0        | 0       | 0       | 0       | 0       | 0        | 0       | 0       | 0        | 0       | 0       | 0       | 0       | 0       | 0        | 0       | 0       |
| Alistipes           | 1              | 52             | 0        | 0       | 0        | 0        | 0       | 1       | 0       | 0       | 0        | 0       | 0       | 0        | 0       | 1       | 1       | 0       | 0       | 0        | 0       | 0       |
| Alkalilimnicola     | 2              | 97             | 0        | 0       | 0        | 0        | 0       | 0       | 0       | 1       | 1        | 0       | 0       | 0        | 0       | 1       | 0       | 0       | 0       | 0        | 1       | 0       |
| Alkaliphilus        | 2              | 62             | 0        | 0       | 0        | 0        | 0       | 1       | 1       | 0       | 0        | 0       | 0       | 0        | 0       | 1       | 1       | 0       | 0       | 0        | 0       | 0       |
| Allochromatium      | 2              | 84             | 0        | 0       | 0        | 0        | 0       | 1       | 0       | 0       | 0        | 0       | 0       | 0        | 0       | 1       | 0       | 0       | 0       | 0        | 1       | 0       |
| Alphaproteobacteria | 1              | 3              | 0        | 0       | 0        | 0        | 0       | 0       | 0       | 0       | 0        | 0       | 0       | 0        | 0       | 0       | 0       | 0       | 0       | 0        | 0       | 0       |
| Alteromonadales     | 1              | 12             | 0        | 0       | 0        | 0        | 0       | 0       | 0       | 0       | 0        | 0       | 0       | 0        | 0       | 0       | 0       | 0       | 0       | 0        | 0       | 0       |
| Alteromonas         | 1              | 37             | 0        | 0       | 0        | 0        | 0       | 0       | 0       | 0       | 0        | 0       | 0       | 0        | 0       | 0       | 0       | 0       | 0       | 0        | 0       | 0       |
| Aminobacter         | 1              | 4              | 0        | 0       | 0        | 0        | 0       | 0       | 0       | 0       | 0        | 0       | 0       | 0        | 0       | 0       | 0       | 0       | 0       | 1        | 0       | 0       |
| Aminobacterium      | 2              | 59             | 0        | 0       | 0        | 0        | 0       | 1       | 1       | 0       | 1        | 0       | 0       | 0        | 0       | 1       | 1       | 0       | 0       | 0        | 1       | 0       |

| Genus            | Cluster Number | Protein Counts | 3.1.3.41 | 3.1.8.1 | 3.2.1.31 | 3.3.2.10 | 3.3.2.9 | 3.5.1.- | 3.5.1.4 | 3.5.1.5 | 3.5.1.54 | 3.5.1.6 | 3.5.2.- | 3.5.2.15 | 3.5.2.2 | 3.5.4.- | 3.5.4.5 | 3.5.5.1 | 3.5.5.7 | 3.5.99.3 | 3.6.1.7 | 3.7.1.- |
|------------------|----------------|----------------|----------|---------|----------|----------|---------|---------|---------|---------|----------|---------|---------|----------|---------|---------|---------|---------|---------|----------|---------|---------|
| Ammonifex        | 2              | 50             | 0        | 0       | 0        | 0        | 0       | 1       | 0       | 0       | 0        | 0       | 0       | 0        | 0       | 0       | 1       | 0       | 0       | 0        | 1       | 0       |
| Amphibacillus    | 1              | 13             | 0        | 0       | 0        | 0        | 0       | 0       | 0       | 0       | 0        | 0       | 0       | 0        | 0       | 0       | 0       | 0       | 0       | 0        | 0       | 0       |
| Amphritea        | 1              | 2              | 0        | 0       | 0        | 0        | 0       | 0       | 0       | 1       | 0        | 0       | 0       | 0        | 0       | 0       | 0       | 0       | 0       | 0        | 0       | 0       |
| Amycolatopsis    | 2              | 201            | 1        | 0       | 0        | 0        | 1       | 1       | 1       | 1       | 1        | 1       | 0       | 0        | 1       | 1       | 1       | 0       | 0       | 0        | 1       | 1       |
| Amycolicoccus    | 1              | 43             | 0        | 0       | 0        | 0        | 0       | 0       | 0       | 0       | 0        | 0       | 0       | 0        | 0       | 0       | 0       | 0       | 0       | 0        | 0       | 0       |
| Anabaena         | 2              | 92             | 0        | 0       | 0        | 0        | 1       | 0       | 1       | 1       | 0        | 0       | 0       | 0        | 0       | 1       | 0       | 0       | 0       | 0        | 1       | 0       |
| Anaerobaculum    | 1              | 11             | 0        | 0       | 0        | 0        | 0       | 0       | 0       | 0       | 0        | 0       | 0       | 0        | 0       | 0       | 0       | 0       | 0       | 0        | 0       | 0       |
| Anaerococcus     | 2              | 46             | 0        | 0       | 0        | 0        | 0       | 0       | 0       | 1       | 0        | 0       | 0       | 0        | 1       | 1       | 1       | 0       | 0       | 0        | 1       | 0       |
| Anaerolinea      | 2              | 66             | 0        | 0       | 0        | 0        | 0       | 1       | 1       | 0       | 1        | 0       | 0       | 0        | 1       | 0       | 1       | 0       | 0       | 0        | 0       | 0       |
| Anaeromyxobacter | 3              | 117            | 0        | 0       | 0        | 0        | 1       | 0       | 0       | 1       | 0        | 0       | 0       | 0        | 0       | 1       | 1       | 0       | 0       | 0        | 1       | 1       |
| Anaerostipes     | 1              | 44             | 0        | 0       | 0        | 0        | 0       | 1       | 0       | 0       | 1        | 0       | 0       | 0        | 1       | 0       | 0       | 0       | 0       | 0        | 1       | 0       |
| Anaerotruncus    | 1              | 2              | 0        | 0       | 0        | 0        | 0       | 0       | 0       | 0       | 0        | 0       | 0       | 0        | 0       | 0       | 0       | 0       | 0       | 0        | 0       | 0       |
| Anaplasma        | 1              | 35             | 0        | 0       | 0        | 0        | 0       | 0       | 0       | 0       | 0        | 0       | 0       | 0        | 0       | 1       | 0       | 0       | 0       | 0        | 0       | 0       |
| Ancylobacter     | 1              | 3              | 0        | 0       | 0        | 0        | 0       | 0       | 0       | 0       | 0        | 0       | 0       | 0        | 0       | 0       | 0       | 0       | 0       | 0        | 0       | 0       |
| Aneurinibacillus | 1              | 1              | 0        | 0       | 0        | 0        | 0       | 0       | 0       | 0       | 0        | 0       | 0       | 0        | 0       | 0       | 0       | 0       | 0       | 0        | 0       | 0       |
| Angomonas        | 1              | 1              | 0        | 0       | 0        | 0        | 0       | 0       | 0       | 0       | 0        | 0       | 0       | 0        | 0       | 0       | 0       | 0       | 0       | 0        | 0       | 0       |
| Anoxybacillus    | 2              | 72             | 0        | 0       | 0        | 0        | 0       | 1       | 1       | 0       | 0        | 0       | 0       | 0        | 0       | 1       | 1       | 0       | 0       | 0        | 1       | 0       |
| Aquifex          | 2              | 45             | 0        | 0       | 0        | 0        | 0       | 0       | 1       | 0       | 0        | 0       | 0       | 0        | 0       | 1       | 0       | 0       | 0       | 0        | 0       | 0       |
| Aquimarina       | 1              | 2              | 0        | 0       | 0        | 0        | 0       | 0       | 0       | 0       | 0        | 0       | 0       | 0        | 0       | 0       | 0       | 0       | 0       | 0        | 0       | 0       |
| Arcanobacterium  | 2              | 45             | 1        | 0       | 0        | 0        | 1       | 0       | 0       | 0       | 0        | 0       | 0       | 0        | 0       | 1       | 1       | 0       | 0       | 0        | 0       | 1       |
| Archaeoglobus    | 1              | 14             | 0        | 0       | 0        | 0        | 0       | 0       | 0       | 0       | 0        | 0       | 0       | 0        | 0       | 0       | 0       | 0       | 0       | 0        | 0       | 0       |
| Arcobacter       | 2              | 101            | 0        | 0       | 0        | 0        | 0       | 1       | 1       | 1       | 1        | 0       | 0       | 0        | 0       | 0       | 0       | 0       | 0       | 0        | 1       | 0       |
| Aromatoleum      | 3              | 133            | 1        | 0       | 0        | 0        | 0       | 0       | 0       | 0       | 0        | 0       | 0       | 0        | 0       | 1       | 0       | 0       | 0       | 0        | 0       | 0       |
| Arsenophonus     | 1              | 4              | 0        | 0       | 0        | 0        | 0       | 0       | 0       | 0       | 0        | 0       | 0       | 0        | 0       | 0       | 0       | 0       | 0       | 0        | 0       | 0       |
| Arthrobacter     | 2              | 206            | 1        | 0       | 0        | 0        | 1       | 1       | 1       | 1       | 1        | 0       | 0       | 0        | 0       | 1       | 1       | 1       | 0       | 1        | 1       | 1       |
| Arthrospira      | 2              | 67             | 0        | 0       | 0        | 0        | 0       | 1       | 1       | 1       | 0        | 0       | 0       | 0        | 0       | 1       | 1       | 0       | 0       | 0        | 1       | 0       |
| Aster            | 1              | 10             | 0        | 0       | 0        | 0        | 0       | 0       | 0       | 0       | 0        | 0       | 0       | 0        | 0       | 1       | 0       | 0       | 0       | 0        | 0       | 0       |
| Asticcacaulis    | 2              | 103            | 0        | 0       | 0        | 0        | 0       | 1       | 0       | 0       | 1        | 0       | 0       | 0        | 0       | 1       | 1       | 0       | 0       | 0        | 0       | 1       |
| Atopobium        | 1              | 28             | 0        | 0       | 0        | 0        | 0       | 0       | 0       | 0       | 0        | 0       | 0       | 0        | 1       | 1       | 1       | 0       | 0       | 0        | 0       | 0       |
| Aurantimonas     | 1              | 2              | 0        | 0       | 0        | 0        | 0       | 0       | 0       | 1       | 0        | 0       | 0       | 0        | 0       | 0       | 0       | 0       | 0       | 0        | 0       | 0       |
| Avibacterium     | 1              | 17             | 0        | 0       | 0        | 0        | 0       | 1       | 0       | 0       | 0        | 0       | 0       | 0        | 0       | 0       | 0       | 0       | 0       | 0        | 0       | 0       |
| Azoarcus         | 3              | 172            | 0        | 0       | 0        | 0        | 0       | 0       | 0       | 1       | 1        | 0       | 0       | 0        | 0       | 1       | 0       | 0       | 0       | 0        | 1       | 1       |
| Azorhizobium     | 3              | 149            | 0        | 0       | 0        | 0        | 0       | 1       | 1       | 1       | 1        | 1       | 0       | 0        | 1       | 1       | 0       | 0       | 1       | 0        | 1       | 1       |
| Azorhizophilus   | 1              | 4              | 0        | 0       | 0        | 0        | 0       | 0       | 0       | 0       | 0        | 0       | 0       | 0        | 0       | 0       | 0       | 0       | 0       | 0        | 0       | 0       |
| Azospira         | 1              | 19             | 0        | 0       | 0        | 0        | 0       | 0       | 0       | 0       | 0        | 0       | 0       | 0        | 0       | 0       | 0       | 0       | 0       | 0        | 0       | 0       |
| Azospirillum     | 2              | 198            | 0        | 0       | 0        | 0        | 1       | 1       | 1       | 1       | 1        | 1       | 1       | 0        | 1       | 1       | 1       | 0       | 1       | 0        | 1       | 1       |
| Azotobacter      | 3              | 183            | 0        | 0       | 0        | 0        | 1       | 1       | 0       | 1       | 1        | 0       | 0       | 0        | 0       | 1       | 0       | 0       | 0       | 0        | 1       | 1       |
| Bacillales       | 1              | 9              | 0        | 0       | 0        | 0        | 0       | 0       | 0       | 0       | 0        | 0       | 0       | 0        | 0       | 0       | 0       | 0       | 0       | 0        | 0       | 0       |
| Bacilli          | 1              | 3              | 0        | 0       | 0        | 0        | 0       | 0       | 0       | 0       | 0        | 0       | 0       | 0        | 0       | 0       | 0       | 0       | 0       | 0        | 0       | 0       |
| Bacillus         | 2              | 237            | 0        | 0       | 1        | 0        | 1       | 1       | 1       | 1       | 1        | 1       | 0       | 0        | 1       | 1       | 1       | 0       | 1       | 0        | 1       | 1       |
| Bacteria         | 2              | 86             | 0        | 0       | 0        | 0        | 1       | 1       | 1       | 1       | 1        | 0       | 0       | 0        | 0       | 1       | 0       | 0       | 0       | 1        | 0       | 0       |
| Bacteriovorax    | 2              | 98             | 0        | 0       | 0        | 0        | 1       | 0       | 0       | 0       | 0        | 0       | 0       | 0        | 0       | 1       | 1       | 0       | 0       | 0        | 0       | 0       |
| Bacteroidales    | 2              | 59             | 0        | 0       | 0        | 0        | 0       | 0       | 0       | 0       | 0        | 0       | 0       | 0        | 0       | 1       | 1       | 0       | 0       | 0        | 0       | 0       |
| Bacteroides      | 2              | 96             | 0        | 0       | 0        | 0        | 0       | 0       | 0       | 0       | 0        | 0       | 0       | 0        | 0       | 1       | 1       | 0       | 0       | 0        | 0       | 0       |
| Bacteroidetes    | 1              | 2              | 0        | 0       | 0        | 0        | 0       | 0       | 0       | 0       | 0        | 0       | 0       | 0        | 0       | 0       | 0       | 0       | 0       | 0        | 0       | 0       |
| Bartonella       | 2              | 50             | 0        | 0       | 0        | 0        | 0       | 0       | 0       | 0       | 0        | 0       | 0       | 0        | 0       | 1       | 0       | 0       | 0       | 0        | 0       | 0       |
| Baumannia        | 2              | 24             | 0        | 0       | 0        | 0        | 0       | 0       | 0       | 0       | 0        | 0       | 0       | 0        | 0       | 1       | 0       | 0       | 0       | 0        | 0       | 0       |
| Bdellovibrio     | 2              | 87             | 0        | 0       | 0        | 0        | 0       | 1       | 0       | 0       | 0        | 0       | 0       | 0        | 0       | 1       | 1       | 0       | 0       | 0        | 0       | 1       |
| Beijerinckia     | 3              | 123            | 0        | 0       | 0        | 0        | 1       | 0       | 0       | 1       | 1        | 0       | 1       | 0        | 0       | 1       | 1       | 0       | 0       | 0        | 1       | 1       |
| Belliella        | 1              | 14             | 0        | 0       | 0        | 0        | 0       | 0       | 0       | 0       | 0        | 0       | 0       | 0        | 0       | 0       | 0       | 0       | 0       | 0        | 0       | 0       |
| Beutenbergia     | 2              | 82             | 1        | 0       | 0        | 0        | 1       | 0       | 0       | 0       | 1        | 0       | 0       | 0        | 1       | 1       | 1       | 0       | 0       | 0        | 1       | 1       |
| Bifidobacterium  | 2              | 61             | 1        | 0       | 1        | 0        | 0       | 1       | 0       | 1       | 1        | 0       | 0       | 0        | 0       | 1       | 0       | 0       | 0       | 0        | 1       | 0       |

| Genus                | Cluster Number | Protein Counts | 3.1.3.41 | 3.1.8.1 | 3.2.1.31 | 3.3.2.10 | 3.3.2.9 | 3.5.1.- | 3.5.1.4 | 3.5.1.5 | 3.5.1.54 | 3.5.1.6 | 3.5.2.- | 3.5.2.15 | 3.5.2.2 | 3.5.4.- | 3.5.4.5 | 3.5.5.1 | 3.5.5.7 | 3.5.99.3 | 3.6.1.7 | 3.7.1.- |
|----------------------|----------------|----------------|----------|---------|----------|----------|---------|---------|---------|---------|----------|---------|---------|----------|---------|---------|---------|---------|---------|----------|---------|---------|
| Bizonia              | 1              | 1              | 0        | 0       | 0        | 0        | 0       | 0       | 0       | 0       | 0        | 0       | 0       | 0        | 0       | 0       | 0       | 0       | 0       | 0        | 0       | 0       |
| Blastococcus         | 1              | 39             | 0        | 0       | 0        | 0        | 0       | 0       | 0       | 0       | 0        | 0       | 0       | 0        | 0       | 0       | 0       | 0       | 0       | 0        | 0       | 0       |
| Blattabacterium      | 1              | 23             | 0        | 0       | 0        | 0        | 0       | 0       | 0       | 1       | 0        | 0       | 0       | 0        | 0       | 1       | 0       | 0       | 0       | 0        | 0       | 1       |
| Blautia              | 1              | 22             | 0        | 0       | 0        | 0        | 0       | 0       | 0       | 0       | 0        | 0       | 0       | 0        | 0       | 0       | 1       | 0       | 0       | 0        | 0       | 1       |
| Bordetella           | 3              | 227            | 0        | 0       | 0        | 0        | 1       | 1       | 1       | 1       | 1        | 1       | 0       | 0        | 1       | 1       | 0       | 1       | 0       | 0        | 1       | 1       |
| Borrelia             | 1              | 32             | 0        | 0       | 0        | 0        | 0       | 0       | 0       | 0       | 0        | 0       | 0       | 0        | 0       | 0       | 1       | 0       | 0       | 0        | 1       | 0       |
| Brachybacterium      | 1              | 18             | 0        | 0       | 0        | 0        | 0       | 0       | 0       | 0       | 0        | 0       | 0       | 0        | 0       | 0       | 0       | 0       | 0       | 0        | 0       | 0       |
| Brachymonas          | 1              | 4              | 0        | 0       | 0        | 0        | 0       | 0       | 0       | 0       | 0        | 0       | 0       | 0        | 0       | 0       | 0       | 0       | 0       | 0        | 0       | 0       |
| Brachyspira          | 2              | 79             | 0        | 0       | 1        | 0        | 0       | 1       | 1       | 0       | 0        | 0       | 0       | 0        | 1       | 0       | 0       | 0       | 0       | 1        | 0       | 0       |
| Bradyrhizobiaceae    | 1              | 20             | 0        | 0       | 0        | 0        | 0       | 0       | 0       | 1       | 0        | 0       | 0       | 0        | 0       | 0       | 0       | 0       | 0       | 0        | 0       | 0       |
| Bradyrhizobium       | 3              | 254            | 0        | 0       | 0        | 0        | 1       | 1       | 1       | 1       | 1        | 1       | 0       | 1        | 1       | 1       | 1       | 0       | 1       | 0        | 1       | 1       |
| Brenneria            | 1              | 20             | 0        | 0       | 0        | 0        | 0       | 0       | 0       | 0       | 0        | 0       | 0       | 0        | 0       | 0       | 0       | 0       | 0       | 0        | 0       | 0       |
| Brevibacillus        | 2              | 122            | 0        | 0       | 0        | 0        | 0       | 1       | 1       | 0       | 1        | 1       | 0       | 0        | 1       | 1       | 1       | 1       | 0       | 0        | 0       | 0       |
| Brevibacterium       | 1              | 4              | 0        | 0       | 0        | 0        | 0       | 0       | 0       | 0       | 0        | 0       | 0       | 0        | 0       | 0       | 0       | 0       | 0       | 0        | 0       | 0       |
| Brevundimonas        | 2              | 105            | 0        | 0       | 0        | 0        | 0       | 1       | 0       | 0       | 0        | 0       | 0       | 0        | 0       | 1       | 0       | 0       | 0       | 0        | 0       | 0       |
| Brucella             | 3              | 138            | 0        | 0       | 0        | 0        | 0       | 0       | 0       | 1       | 0        | 1       | 0       | 0        | 1       | 1       | 0       | 0       | 0       | 0        | 0       | 1       |
| Buchnera             | 1              | 26             | 0        | 0       | 0        | 0        | 0       | 0       | 0       | 0       | 0        | 0       | 0       | 0        | 0       | 1       | 0       | 0       | 0       | 0        | 0       | 0       |
| Burkholderia         | 3              | 424            | 0        | 0       | 0        | 0        | 1       | 1       | 1       | 1       | 1        | 1       | 1       | 0        | 1       | 1       | 1       | 1       | 1       | 1        | 1       | 1       |
| Burkholderiaceae     | 3              | 143            | 0        | 0       | 0        | 0        | 1       | 1       | 0       | 1       | 1        | 0       | 0       | 0        | 0       | 1       | 0       | 1       | 1       | 1        | 1       | 0       |
| Burkholderiales      | 1              | 24             | 0        | 0       | 0        | 0        | 0       | 0       | 0       | 0       | 0        | 0       | 0       | 0        | 0       | 0       | 0       | 0       | 0       | 0        | 0       | 0       |
| Buttiauxella         | 1              | 2              | 0        | 0       | 0        | 0        | 0       | 0       | 0       | 0       | 0        | 0       | 0       | 0        | 0       | 0       | 0       | 0       | 0       | 0        | 0       | 0       |
| Butyrivibrio         | 2              | 67             | 0        | 0       | 0        | 0        | 0       | 1       | 0       | 0       | 0        | 0       | 0       | 0        | 0       | 1       | 1       | 0       | 0       | 0        | 1       | 0       |
| Caldanaerobacter     | 2              | 63             | 0        | 0       | 0        | 0        | 0       | 1       | 1       | 0       | 1        | 0       | 0       | 0        | 0       | 1       | 1       | 0       | 0       | 0        | 1       | 0       |
| Caldicellulosiruptor | 2              | 75             | 0        | 0       | 1        | 0        | 0       | 1       | 1       | 1       | 0        | 0       | 0       | 0        | 0       | 1       | 1       | 0       | 0       | 0        | 0       | 0       |
| Caldilinea           | 1              | 23             | 0        | 0       | 0        | 0        | 0       | 0       | 0       | 0       | 0        | 0       | 0       | 0        | 0       | 0       | 0       | 0       | 0       | 0        | 0       | 0       |
| Caldimonas           | 1              | 6              | 0        | 0       | 0        | 0        | 0       | 0       | 0       | 1       | 0        | 0       | 0       | 0        | 0       | 0       | 0       | 0       | 0       | 0        | 0       | 0       |
| Caldisericum         | 1              | 10             | 0        | 0       | 0        | 0        | 0       | 0       | 0       | 0       | 0        | 0       | 0       | 0        | 0       | 0       | 0       | 0       | 0       | 0        | 0       | 0       |
| Caldisphaera         | 1              | 7              | 0        | 0       | 0        | 0        | 0       | 0       | 0       | 0       | 0        | 0       | 0       | 0        | 0       | 0       | 0       | 0       | 0       | 0        | 0       | 0       |
| Calditerrivibrio     | 2              | 74             | 0        | 0       | 0        | 0        | 0       | 1       | 1       | 0       | 1        | 0       | 0       | 0        | 0       | 1       | 0       | 0       | 0       | 0        | 1       | 0       |
| Caldivirga           | 1              | 13             | 0        | 0       | 0        | 0        | 0       | 0       | 0       | 0       | 0        | 0       | 0       | 0        | 0       | 0       | 0       | 0       | 0       | 0        | 0       | 0       |
| Calothrix            | 1              | 43             | 0        | 0       | 0        | 0        | 0       | 0       | 0       | 1       | 0        | 0       | 0       | 0        | 0       | 0       | 0       | 0       | 0       | 0        | 0       | 0       |
| Calyptogena          | 2              | 34             | 0        | 0       | 0        | 0        | 0       | 0       | 0       | 0       | 0        | 0       | 0       | 0        | 0       | 1       | 0       | 0       | 0       | 0        | 0       | 0       |
| Campylobacter        | 2              | 80             | 0        | 0       | 0        | 0        | 0       | 1       | 1       | 0       | 1        | 0       | 0       | 0        | 0       | 0       | 0       | 0       | 0       | 0        | 0       | 1       |
| Candidatus           | 2              | 290            | 0        | 0       | 0        | 0        | 1       | 1       | 1       | 1       | 1        | 1       | 0       | 0        | 1       | 1       | 1       | 0       | 1       | 0        | 1       | 1       |
| Capnocytophaga       | 1              | 50             | 0        | 0       | 0        | 0        | 0       | 0       | 0       | 0       | 0        | 0       | 0       | 0        | 0       | 1       | 1       | 0       | 0       | 0        | 0       | 1       |
| Carbophilus          | 1              | 2              | 0        | 0       | 0        | 0        | 0       | 0       | 0       | 0       | 0        | 0       | 0       | 0        | 0       | 0       | 0       | 0       | 0       | 0        | 0       | 0       |
| Carboxydibrachium    | 1              | 14             | 0        | 0       | 0        | 0        | 0       | 1       | 0       | 0       | 0        | 0       | 0       | 0        | 0       | 0       | 0       | 0       | 0       | 0        | 0       | 0       |
| Carboxydothermus     | 2              | 68             | 0        | 0       | 0        | 0        | 0       | 1       | 0       | 0       | 1        | 0       | 0       | 0        | 0       | 1       | 1       | 0       | 0       | 0        | 0       | 0       |
| Carica               | 1              | 2              | 0        | 0       | 1        | 0        | 0       | 0       | 0       | 0       | 0        | 0       | 0       | 0        | 0       | 0       | 0       | 0       | 0       | 0        | 0       | 0       |
| Carnobacterium       | 2              | 71             | 0        | 0       | 1        | 0        | 1       | 0       | 0       | 0       | 0        | 0       | 0       | 0        | 0       | 1       | 1       | 0       | 0       | 0        | 1       | 0       |
| Catenibacterium      | 1              | 2              | 0        | 0       | 0        | 0        | 0       | 0       | 0       | 0       | 0        | 0       | 0       | 0        | 0       | 0       | 0       | 0       | 0       | 0        | 0       | 0       |
| Catenovulum          | 1              | 2              | 0        | 0       | 0        | 0        | 0       | 0       | 0       | 1       | 0        | 0       | 0       | 0        | 0       | 0       | 0       | 0       | 0       | 0        | 0       | 0       |
| Catenulispora        | 3              | 159            | 1        | 0       | 0        | 0        | 1       | 1       | 1       | 1       | 1        | 0       | 0       | 0        | 0       | 1       | 1       | 1       | 0       | 0        | 0       | 1       |
| Caulobacter          | 3              | 168            | 0        | 0       | 0        | 0        | 1       | 1       | 1       | 0       | 1        | 0       | 0       | 0        | 0       | 1       | 1       | 1       | 0       | 0        | 0       | 1       |
| Cedecea              | 1              | 45             | 0        | 0       | 0        | 0        | 0       | 0       | 0       | 0       | 0        | 0       | 0       | 0        | 0       | 0       | 0       | 0       | 0       | 0        | 0       | 0       |
| Cellulomonas         | 2              | 96             | 1        | 0       | 0        | 0        | 1       | 1       | 1       | 1       | 1        | 0       | 0       | 0        | 1       | 1       | 1       | 0       | 0       | 0        | 1       | 0       |
| Cellulophaga         | 2              | 105            | 0        | 0       | 0        | 0        | 0       | 0       | 0       | 0       | 1        | 0       | 0       | 0        | 0       | 1       | 1       | 0       | 1       | 0        | 0       | 1       |
| Cellulosilyticum     | 1              | 14             | 0        | 0       | 0        | 0        | 0       | 0       | 0       | 0       | 0        | 0       | 0       | 0        | 0       | 0       | 0       | 0       | 0       | 0        | 0       | 0       |
| Cellvibrio           | 2              | 85             | 0        | 0       | 0        | 0        | 0       | 1       | 0       | 0       | 1        | 0       | 0       | 0        | 0       | 1       | 0       | 0       | 0       | 1        | 0       | 0       |
| Cenarchaeum          | 1              | 7              | 0        | 0       | 0        | 0        | 0       | 0       | 0       | 0       | 0        | 0       | 0       | 0        | 0       | 0       | 0       | 0       | 0       | 0        | 0       | 0       |
| Chamaesiphon         | 1              | 13             | 0        | 0       | 0        | 0        | 0       | 0       | 0       | 1       | 0        | 0       | 0       | 0        | 0       | 0       | 0       | 0       | 0       | 0        | 0       | 0       |
| Chelativorans        | 3              | 136            | 0        | 0       | 0        | 0        | 0       | 0       | 0       | 1       | 0        | 1       | 0       | 0        | 1       | 1       | 1       | 0       | 0       | 0        | 0       | 0       |



| Genus                  | Cluster Number | Protein Counts | 3.1.3.41 | 3.1.8.1 | 3.2.1.31 | 3.3.2.10 | 3.3.2.9 | 3.5.1.- | 3.5.1.4 | 3.5.1.5 | 3.5.1.54 | 3.5.1.6 | 3.5.2.- | 3.5.2.15 | 3.5.2.2 | 3.5.4.- | 3.5.4.5 | 3.5.5.1 | 3.5.5.7 | 3.5.99.3 | 3.6.1.7 | 3.7.1.- |   |
|------------------------|----------------|----------------|----------|---------|----------|----------|---------|---------|---------|---------|----------|---------|---------|----------|---------|---------|---------|---------|---------|----------|---------|---------|---|
| Chelatococcus          | 1              | 2              | 0        | 0       | 0        | 0        | 0       | 0       | 0       | 0       | 0        | 0       | 0       | 0        | 0       | 0       | 0       | 0       | 0       | 0        | 0       | 0       |   |
| Chitinophaga           | 2              | 98             | 0        | 0       | 0        | 0        | 1       | 0       | 0       | 1       | 0        | 0       | 0       | 0        | 1       | 1       | 1       | 0       | 0       | 0        | 0       | 1       | 1 |
| Chlamydia              | 1              | 36             | 0        | 0       | 0        | 0        | 0       | 1       | 0       | 0       | 0        | 0       | 0       | 0        | 0       | 1       | 0       | 0       | 0       | 0        | 0       | 0       | 0 |
| Chlamydomonas          | 1              | 3              | 0        | 0       | 0        | 0        | 0       | 0       | 0       | 0       | 0        | 0       | 0       | 0        | 0       | 0       | 0       | 0       | 0       | 0        | 0       | 0       | 0 |
| Chlamydomonada         | 1              | 31             | 0        | 0       | 0        | 0        | 0       | 0       | 0       | 0       | 0        | 0       | 0       | 0        | 0       | 1       | 0       | 0       | 0       | 0        | 0       | 0       | 0 |
| Chlorobaculum          | 2              | 61             | 0        | 0       | 0        | 0        | 0       | 0       | 0       | 0       | 0        | 0       | 0       | 0        | 0       | 1       | 0       | 0       | 0       | 0        | 0       | 1       | 0 |
| Chlorobium             | 2              | 89             | 0        | 0       | 0        | 0        | 0       | 0       | 0       | 0       | 0        | 0       | 0       | 0        | 0       | 1       | 0       | 0       | 0       | 0        | 0       | 1       | 0 |
| Chlorobium/Pelodictyon | 1              | 2              | 0        | 0       | 0        | 0        | 0       | 0       | 0       | 0       | 0        | 0       | 0       | 0        | 0       | 0       | 0       | 0       | 0       | 0        | 0       | 0       | 0 |
| Chloroflexus           | 2              | 105            | 0        | 0       | 0        | 0        | 0       | 1       | 0       | 0       | 1        | 0       | 0       | 0        | 0       | 0       | 1       | 0       | 0       | 0        | 0       | 1       | 0 |
| Chlorogloeopsis        | 1              | 9              | 0        | 0       | 0        | 0        | 0       | 0       | 0       | 1       | 0        | 0       | 0       | 0        | 0       | 0       | 0       | 0       | 0       | 0        | 0       | 0       | 0 |
| Chloroherpeton         | 2              | 59             | 0        | 0       | 0        | 0        | 0       | 0       | 0       | 0       | 0        | 0       | 0       | 0        | 0       | 1       | 1       | 0       | 0       | 0        | 0       | 1       | 0 |
| Chromobacterium        | 2              | 117            | 0        | 0       | 0        | 0        | 1       | 1       | 0       | 0       | 1        | 0       | 0       | 0        | 0       | 1       | 1       | 0       | 0       | 0        | 0       | 0       | 0 |
| Chromohalobacter       | 2              | 145            | 0        | 0       | 0        | 0        | 0       | 0       | 1       | 1       | 1        | 1       | 0       | 0        | 0       | 1       | 1       | 0       | 0       | 0        | 0       | 1       | 0 |
| Chroococcidiopsis      | 1              | 24             | 0        | 0       | 0        | 0        | 0       | 0       | 0       | 0       | 0        | 0       | 0       | 0        | 0       | 0       | 0       | 0       | 0       | 0        | 0       | 0       | 0 |
| Chryseobacterium       | 2              | 104            | 0        | 0       | 0        | 0        | 0       | 1       | 1       | 1       | 1        | 1       | 0       | 0        | 1       | 0       | 0       | 0       | 0       | 0        | 0       | 0       | 1 |
| Citricella             | 1              | 13             | 0        | 0       | 0        | 0        | 0       | 0       | 0       | 1       | 0        | 0       | 0       | 0        | 0       | 0       | 0       | 0       | 0       | 0        | 0       | 0       | 0 |
| Citrobacter            | 2              | 190            | 0        | 0       | 0        | 0        | 0       | 0       | 0       | 1       | 1        | 1       | 1       | 0        | 0       | 1       | 1       | 0       | 0       | 0        | 0       | 1       | 1 |
| Clavibacter            | 2              | 83             | 1        | 0       | 0        | 0        | 1       | 0       | 1       | 0       | 1        | 0       | 0       | 0        | 0       | 1       | 1       | 0       | 0       | 0        | 0       | 0       | 1 |
| Clonorchis             | 1              | 1              | 0        | 0       | 0        | 0        | 0       | 0       | 0       | 0       | 0        | 0       | 0       | 0        | 0       | 0       | 0       | 0       | 0       | 0        | 0       | 0       | 0 |
| Clostridiales          | 2              | 77             | 0        | 0       | 0        | 0        | 0       | 1       | 0       | 0       | 1        | 1       | 0       | 0        | 1       | 1       | 1       | 0       | 0       | 0        | 0       | 1       | 1 |
| Clostridium            | 2              | 191            | 0        | 0       | 1        | 0        | 1       | 1       | 1       | 1       | 1        | 1       | 0       | 0        | 1       | 1       | 1       | 1       | 0       | 1        | 1       | 1       | 1 |
| Cohnella               | 1              | 2              | 0        | 0       | 0        | 0        | 0       | 0       | 0       | 0       | 0        | 0       | 0       | 0        | 0       | 0       | 0       | 0       | 0       | 0        | 0       | 0       | 0 |
| Coleofasciculus        | 1              | 4              | 0        | 0       | 0        | 0        | 0       | 0       | 0       | 1       | 0        | 0       | 0       | 0        | 0       | 0       | 0       | 0       | 0       | 0        | 0       | 0       | 0 |
| Collimonas             | 1              | 35             | 0        | 0       | 0        | 0        | 0       | 0       | 0       | 0       | 0        | 0       | 0       | 0        | 0       | 0       | 0       | 0       | 0       | 0        | 0       | 0       | 0 |
| Colwellia              | 2              | 130            | 0        | 0       | 0        | 0        | 0       | 1       | 1       | 0       | 1        | 1       | 0       | 0        | 1       | 1       | 1       | 0       | 0       | 0        | 0       | 1       | 0 |
| Comamonas              | 2              | 196            | 0        | 0       | 0        | 0        | 1       | 1       | 1       | 1       | 1        | 1       | 0       | 0        | 1       | 0       | 0       | 0       | 0       | 1        | 0       | 0       | 1 |
| Conexibacter           | 3              | 117            | 0        | 0       | 0        | 0        | 1       | 1       | 0       | 1       | 1        | 0       | 0       | 0        | 0       | 1       | 0       | 0       | 1       | 0        | 0       | 0       | 1 |
| Coprobacillus          | 1              | 2              | 0        | 0       | 0        | 0        | 0       | 0       | 0       | 0       | 0        | 0       | 0       | 0        | 0       | 0       | 0       | 0       | 0       | 0        | 0       | 0       | 0 |
| Coprococcus            | 2              | 76             | 0        | 0       | 0        | 0        | 0       | 1       | 0       | 0       | 0        | 0       | 0       | 0        | 1       | 1       | 1       | 0       | 0       | 0        | 0       | 1       | 0 |
| Coprothermobacter      | 2              | 45             | 0        | 0       | 0        | 0        | 0       | 0       | 0       | 0       | 1        | 0       | 0       | 0        | 0       | 1       | 1       | 0       | 0       | 0        | 0       | 1       | 0 |
| Coralimargarita        | 2              | 68             | 0        | 0       | 0        | 0        | 0       | 1       | 0       | 1       | 1        | 0       | 0       | 0        | 0       | 1       | 1       | 0       | 0       | 0        | 0       | 0       | 0 |
| Corallococcus          | 1              | 29             | 0        | 0       | 0        | 0        | 0       | 0       | 0       | 0       | 0        | 0       | 0       | 0        | 0       | 0       | 0       | 0       | 0       | 0        | 0       | 0       | 0 |
| Coriobacterium         | 2              | 36             | 0        | 0       | 0        | 0        | 0       | 0       | 0       | 0       | 0        | 0       | 0       | 0        | 0       | 1       | 1       | 0       | 0       | 0        | 0       | 0       | 0 |
| Corynebacterineae      | 1              | 5              | 0        | 0       | 0        | 0        | 0       | 0       | 0       | 0       | 0        | 0       | 0       | 0        | 0       | 0       | 0       | 0       | 0       | 0        | 0       | 0       | 0 |
| Corynebacterium        | 2              | 175            | 1        | 0       | 1        | 0        | 1       | 1       | 0       | 1       | 1        | 1       | 0       | 0        | 0       | 1       | 1       | 0       | 0       | 0        | 0       | 1       | 1 |
| Coxiella               | 2              | 54             | 0        | 0       | 0        | 0        | 0       | 0       | 0       | 0       | 0        | 0       | 0       | 0        | 0       | 1       | 0       | 0       | 0       | 0        | 0       | 1       | 0 |
| Crinalium              | 1              | 21             | 0        | 0       | 0        | 0        | 0       | 0       | 0       | 1       | 0        | 0       | 0       | 0        | 0       | 0       | 0       | 0       | 0       | 0        | 0       | 0       | 0 |
| Croceibacter           | 2              | 80             | 0        | 0       | 0        | 0        | 0       | 0       | 0       | 0       | 1        | 0       | 0       | 0        | 0       | 1       | 1       | 0       | 1       | 0        | 0       | 0       | 1 |
| Crocospaera            | 1              | 6              | 0        | 0       | 0        | 0        | 0       | 0       | 0       | 0       | 0        | 0       | 0       | 0        | 0       | 0       | 0       | 0       | 0       | 0        | 0       | 0       | 0 |
| Cronobacter            | 2              | 120            | 0        | 0       | 0        | 0        | 0       | 0       | 0       | 0       | 1        | 0       | 0       | 0        | 0       | 1       | 1       | 0       | 0       | 0        | 0       | 1       | 1 |
| Cryptobacterium        | 2              | 39             | 0        | 0       | 0        | 0        | 0       | 0       | 0       | 0       | 1        | 0       | 0       | 0        | 0       | 1       | 0       | 0       | 0       | 0        | 0       | 0       | 0 |
| Cucumis                | 1              | 9              | 0        | 0       | 0        | 0        | 0       | 0       | 0       | 0       | 0        | 0       | 0       | 0        | 0       | 0       | 0       | 0       | 0       | 0        | 0       | 0       | 0 |
| Cupriavidus            | 3              | 317            | 0        | 0       | 0        | 0        | 1       | 1       | 0       | 1       | 1        | 1       | 0       | 0        | 1       | 1       | 0       | 0       | 1       | 1        | 1       | 1       | 1 |
| Curtobacterium         | 1              | 5              | 0        | 0       | 0        | 0        | 0       | 0       | 0       | 0       | 0        | 0       | 0       | 0        | 0       | 0       | 0       | 0       | 0       | 0        | 0       | 0       | 0 |
| Curvibacter            | 1              | 27             | 0        | 0       | 0        | 0        | 0       | 0       | 0       | 1       | 0        | 0       | 0       | 0        | 0       | 0       | 0       | 0       | 0       | 0        | 0       | 0       | 0 |
| Cyanobacterium         | 1              | 9              | 0        | 0       | 0        | 0        | 0       | 0       | 0       | 0       | 0        | 0       | 0       | 0        | 0       | 0       | 0       | 0       | 0       | 0        | 0       | 0       | 0 |
| Cyanobium              | 1              | 10             | 0        | 0       | 0        | 0        | 0       | 0       | 0       | 0       | 0        | 0       | 0       | 0        | 0       | 0       | 0       | 0       | 0       | 0        | 0       | 0       | 0 |
| Cyanothece             | 1              | 34             | 0        | 0       | 0        | 0        | 0       | 0       | 0       | 0       | 0        | 0       | 0       | 0        | 0       | 0       | 0       | 0       | 0       | 0        | 0       | 0       | 0 |
| Cyclobacterium         | 1              | 19             | 0        | 0       | 0        | 0        | 0       | 0       | 0       | 0       | 0        | 0       | 0       | 0        | 0       | 0       | 0       | 0       | 0       | 0        | 0       | 0       | 0 |
| Cycloclasticus         | 1              | 21             | 0        | 0       | 0        | 0        | 0       | 0       | 0       | 0       | 0        | 0       | 0       | 0        | 0       | 0       | 0       | 0       | 0       | 0        | 0       | 0       | 0 |
| Cylindrospermopsis     | 1              | 4              | 0        | 0       | 0        | 0        | 0       | 0       | 0       | 0       | 0        | 0       | 0       | 0        | 0       | 0       | 0       | 0       | 0       | 0        | 0       | 0       | 0 |
| Cylindrospermum        | 1              | 30             | 0        | 0       | 0        | 0        | 0       | 0       | 0       | 0       | 0        | 0       | 0       | 0        | 0       | 0       | 0       | 0       | 0       | 0        | 0       | 0       | 0 |

| Genus              | Cluster Number | Protein Counts | 3.1.3.41 | 3.1.8.1 | 3.2.1.31 | 3.3.2.10 | 3.3.2.9 | 3.5.1.- | 3.5.1.4 | 3.5.1.5 | 3.5.1.54 | 3.5.1.6 | 3.5.2.- | 3.5.2.15 | 3.5.2.2 | 3.5.4.- | 3.5.4.5 | 3.5.5.1 | 3.5.5.7 | 3.5.99.3 | 3.6.1.7 | 3.7.1.- |
|--------------------|----------------|----------------|----------|---------|----------|----------|---------|---------|---------|---------|----------|---------|---------|----------|---------|---------|---------|---------|---------|----------|---------|---------|
| Cytophaga          | 2              | 69             | 0        | 0       | 0        | 0        | 0       | 0       | 0       | 1       | 0        | 0       | 0       | 0        | 0       | 1       | 0       | 0       | 0       | 0        | 0       | 1       |
| Dactylococcopsis   | 1              | 8              | 0        | 0       | 0        | 0        | 0       | 0       | 0       | 0       | 0        | 0       | 0       | 0        | 0       | 0       | 0       | 0       | 0       | 0        | 0       | 0       |
| Dechloromonas      | 1              | 40             | 0        | 0       | 0        | 0        | 0       | 0       | 0       | 0       | 0        | 0       | 0       | 0        | 0       | 0       | 0       | 0       | 0       | 0        | 0       | 0       |
| Dechlorosoma       | 1              | 19             | 0        | 0       | 0        | 0        | 0       | 0       | 0       | 0       | 0        | 0       | 0       | 0        | 0       | 0       | 0       | 0       | 0       | 0        | 0       | 0       |
| Deferribacter      | 2              | 73             | 0        | 0       | 0        | 0        | 0       | 0       | 1       | 0       | 0        | 0       | 0       | 0        | 0       | 1       | 0       | 0       | 0       | 0        | 1       | 0       |
| Dehalobacter       | 1              | 9              | 0        | 0       | 0        | 0        | 0       | 0       | 0       | 0       | 0        | 0       | 0       | 0        | 0       | 0       | 0       | 0       | 0       | 0        | 0       | 0       |
| Dehalococcoides    | 2              | 41             | 0        | 0       | 0        | 0        | 0       | 0       | 0       | 0       | 0        | 0       | 0       | 0        | 0       | 0       | 0       | 0       | 0       | 0        | 1       | 0       |
| Dehalogenimonas    | 1              | 37             | 0        | 0       | 0        | 0        | 0       | 0       | 0       | 0       | 0        | 0       | 0       | 0        | 0       | 0       | 0       | 0       | 0       | 0        | 1       | 0       |
| Deinococcus        | 2              | 140            | 0        | 0       | 0        | 0        | 1       | 1       | 1       | 1       | 1        | 0       | 0       | 0        | 0       | 1       | 1       | 0       | 1       | 0        | 1       | 0       |
| Delftia            | 3              | 177            | 0        | 0       | 0        | 0        | 1       | 1       | 1       | 1       | 1        | 1       | 0       | 0        | 1       | 0       | 0       | 0       | 0       | 1        | 0       | 1       |
| Denitrovibrio      | 2              | 67             | 0        | 0       | 0        | 0        | 0       | 1       | 1       | 0       | 0        | 0       | 0       | 0        | 0       | 1       | 0       | 0       | 0       | 0        | 1       | 0       |
| Desulfarculus      | 2              | 92             | 0        | 0       | 0        | 0        | 0       | 1       | 1       | 0       | 1        | 0       | 0       | 0        | 0       | 1       | 1       | 0       | 0       | 0        | 1       | 0       |
| Desulfatibacillum  | 3              | 84             | 0        | 0       | 0        | 0        | 0       | 0       | 1       | 0       | 0        | 0       | 0       | 0        | 0       | 1       | 0       | 1       | 0       | 0        | 1       | 0       |
| Desulfitobacterium | 2              | 102            | 0        | 0       | 0        | 0        | 0       | 1       | 1       | 0       | 0        | 1       | 0       | 0        | 1       | 1       | 1       | 0       | 0       | 0        | 0       | 1       |
| Desulfobacca       | 2              | 65             | 0        | 0       | 0        | 0        | 0       | 1       | 0       | 0       | 0        | 0       | 0       | 0        | 0       | 1       | 1       | 0       | 0       | 0        | 0       | 1       |
| Desulfobacterium   | 2              | 113            | 0        | 0       | 0        | 0        | 0       | 0       | 0       | 0       | 1        | 0       | 0       | 0        | 0       | 1       | 0       | 0       | 0       | 0        | 0       | 0       |
| Desulfobacula      | 1              | 21             | 0        | 0       | 0        | 0        | 0       | 0       | 0       | 0       | 0        | 0       | 0       | 0        | 0       | 0       | 0       | 0       | 0       | 0        | 0       | 0       |
| Desulfobulbus      | 2              | 88             | 0        | 0       | 0        | 0        | 0       | 1       | 0       | 0       | 0        | 0       | 0       | 0        | 0       | 1       | 0       | 0       | 0       | 0        | 0       | 1       |
| Desulfocapsa       | 1              | 9              | 0        | 0       | 0        | 0        | 0       | 0       | 0       | 0       | 0        | 0       | 0       | 0        | 0       | 0       | 0       | 0       | 0       | 0        | 0       | 0       |
| Desulfococcus      | 2              | 80             | 0        | 0       | 0        | 0        | 0       | 0       | 1       | 0       | 0        | 0       | 0       | 0        | 0       | 1       | 0       | 0       | 0       | 0        | 1       | 0       |
| Desulfohalobium    | 2              | 52             | 0        | 0       | 0        | 0        | 0       | 0       | 1       | 0       | 0        | 0       | 0       | 0        | 0       | 1       | 0       | 0       | 0       | 0        | 1       | 0       |
| Desulfomicrobium   | 2              | 65             | 0        | 0       | 0        | 0        | 0       | 1       | 0       | 0       | 0        | 0       | 1       | 0        | 0       | 1       | 1       | 0       | 0       | 0        | 0       | 0       |
| Desulfomonile      | 1              | 25             | 0        | 0       | 0        | 0        | 0       | 0       | 0       | 0       | 0        | 0       | 0       | 0        | 0       | 0       | 0       | 0       | 0       | 0        | 0       | 0       |
| Desulforhabdus     | 1              | 2              | 0        | 0       | 0        | 0        | 0       | 0       | 0       | 0       | 0        | 0       | 0       | 0        | 0       | 0       | 0       | 0       | 0       | 0        | 0       | 0       |
| Desulfosporosinus  | 1              | 30             | 0        | 0       | 0        | 0        | 0       | 0       | 0       | 0       | 0        | 0       | 0       | 0        | 0       | 0       | 0       | 0       | 0       | 0        | 0       | 0       |
| Desulfotalea       | 2              | 66             | 0        | 0       | 0        | 0        | 0       | 0       | 0       | 0       | 1        | 0       | 0       | 0        | 0       | 1       | 1       | 0       | 0       | 0        | 0       | 0       |
| Desulfotomaculum   | 2              | 98             | 0        | 0       | 0        | 0        | 0       | 1       | 1       | 0       | 0        | 0       | 0       | 0        | 1       | 1       | 1       | 0       | 0       | 0        | 0       | 0       |
| Desulfovibrio      | 2              | 144            | 0        | 0       | 0        | 0        | 0       | 1       | 0       | 1       | 0        | 1       | 1       | 0        | 1       | 1       | 1       | 0       | 0       | 0        | 1       | 0       |
| Desulfurispirillum | 2              | 78             | 0        | 0       | 0        | 0        | 0       | 1       | 1       | 0       | 0        | 0       | 0       | 0        | 0       | 1       | 0       | 0       | 0       | 0        | 1       | 0       |
| Desulfurivibrio    | 2              | 71             | 0        | 0       | 0        | 0        | 0       | 1       | 1       | 0       | 0        | 0       | 0       | 0        | 0       | 1       | 0       | 0       | 0       | 0        | 0       | 0       |
| Desulfurobacterium | 2              | 53             | 0        | 0       | 0        | 0        | 0       | 1       | 1       | 0       | 0        | 0       | 0       | 0        | 0       | 0       | 0       | 0       | 0       | 0        | 0       | 0       |
| Desulfurococcus    | 1              | 11             | 0        | 0       | 0        | 0        | 0       | 0       | 0       | 0       | 0        | 0       | 0       | 0        | 0       | 0       | 0       | 0       | 0       | 0        | 0       | 0       |
| Diaphorobacter     | 1              | 16             | 0        | 0       | 0        | 0        | 0       | 0       | 0       | 0       | 0        | 0       | 0       | 0        | 0       | 0       | 0       | 0       | 0       | 0        | 0       | 1       |
| Dichelobacter      | 2              | 45             | 0        | 0       | 0        | 0        | 0       | 0       | 0       | 0       | 0        | 0       | 0       | 0        | 0       | 1       | 0       | 0       | 0       | 0        | 0       | 0       |
| Dickeya            | 2              | 155            | 0        | 0       | 0        | 0        | 0       | 1       | 1       | 0       | 1        | 1       | 0       | 0        | 1       | 1       | 1       | 1       | 0       | 0        | 1       | 1       |
| Dictyoglomus       | 2              | 62             | 0        | 0       | 1        | 0        | 0       | 1       | 0       | 0       | 0        | 0       | 0       | 0        | 0       | 1       | 1       | 0       | 0       | 0        | 1       | 0       |
| Dinoroseobacter    | 3              | 148            | 0        | 0       | 0        | 0        | 0       | 0       | 0       | 1       | 1        | 1       | 0       | 0        | 1       | 1       | 1       | 0       | 0       | 0        | 0       | 1       |
| Dokdonia           | 1              | 3              | 0        | 0       | 0        | 0        | 0       | 0       | 0       | 0       | 0        | 0       | 0       | 0        | 0       | 0       | 0       | 0       | 0       | 0        | 0       | 0       |
| Dorea              | 1              | 7              | 0        | 0       | 0        | 0        | 0       | 0       | 0       | 0       | 0        | 0       | 0       | 0        | 0       | 0       | 0       | 0       | 0       | 0        | 0       | 0       |
| Dyadobacter        | 2              | 83             | 0        | 0       | 0        | 0        | 0       | 0       | 0       | 0       | 0        | 0       | 0       | 0        | 0       | 1       | 0       | 0       | 0       | 0        | 0       | 1       |
| Echinicola         | 1              | 20             | 0        | 0       | 0        | 0        | 0       | 0       | 0       | 0       | 0        | 0       | 0       | 0        | 0       | 0       | 0       | 0       | 0       | 0        | 0       | 0       |
| Edwardsiella       | 2              | 126            | 0        | 0       | 1        | 0        | 0       | 1       | 0       | 1       | 0        | 0       | 0       | 0        | 0       | 1       | 1       | 0       | 0       | 1        | 1       | 1       |
| Eggerthella        | 1              | 51             | 0        | 0       | 0        | 0        | 0       | 0       | 1       | 0       | 1        | 0       | 0       | 0        | 0       | 1       | 0       | 0       | 0       | 0        | 0       | 0       |
| Ehrlichia          | 2              | 37             | 0        | 0       | 0        | 0        | 0       | 0       | 0       | 0       | 0        | 0       | 0       | 0        | 0       | 1       | 0       | 0       | 0       | 0        | 0       | 0       |
| Eikenella          | 1              | 4              | 0        | 0       | 0        | 0        | 0       | 0       | 0       | 0       | 0        | 0       | 0       | 0        | 0       | 0       | 0       | 0       | 0       | 0        | 0       | 0       |
| Elusimicrobium     | 2              | 44             | 0        | 0       | 0        | 0        | 0       | 1       | 0       | 0       | 0        | 0       | 0       | 0        | 0       | 0       | 0       | 0       | 0       | 0        | 0       | 0       |
| Emticicia          | 1              | 21             | 0        | 0       | 0        | 0        | 0       | 0       | 0       | 0       | 0        | 0       | 0       | 0        | 0       | 0       | 0       | 0       | 0       | 0        | 0       | 0       |
| Enhydrobacter      | 1              | 1              | 0        | 0       | 0        | 0        | 0       | 0       | 0       | 0       | 0        | 0       | 0       | 0        | 0       | 0       | 0       | 0       | 0       | 0        | 0       | 0       |
| Ensifer            | 1              | 2              | 0        | 0       | 0        | 0        | 0       | 0       | 0       | 0       | 0        | 0       | 0       | 0        | 0       | 0       | 0       | 0       | 0       | 0        | 0       | 0       |
| Enterobacter       | 2              | 202            | 0        | 0       | 0        | 0        | 1       | 0       | 0       | 1       | 1        | 1       | 1       | 0        | 0       | 1       | 1       | 1       | 0       | 0        | 1       | 1       |
| Enterobacteriaceae | 2              | 211            | 0        | 0       | 1        | 0        | 1       | 0       | 0       | 1       | 1        | 1       | 0       | 0        | 0       | 1       | 1       | 0       | 0       | 0        | 1       | 1       |
| Enterococcus       | 1              | 187            | 0        | 0       | 0        | 0        | 1       | 1       | 0       | 1       | 1        | 1       | 0       | 0        | 1       | 1       | 1       | 0       | 0       | 0        | 1       | 1       |

| Genus               | Cluster Number | Protein Counts | 3.1.3.41 | 3.1.8.1 | 3.2.1.31 | 3.3.2.10 | 3.3.2.9 | 3.5.1.- | 3.5.1.4 | 3.5.1.5 | 3.5.1.54 | 3.5.1.6 | 3.5.2.- | 3.5.2.15 | 3.5.2.2 | 3.5.4.- | 3.5.4.5 | 3.5.5.1 | 3.5.5.7 | 3.5.99.3 | 3.6.1.7 | 3.7.1.- |
|---------------------|----------------|----------------|----------|---------|----------|----------|---------|---------|---------|---------|----------|---------|---------|----------|---------|---------|---------|---------|---------|----------|---------|---------|
| Enterovibrio        | 1              | 15             | 0        | 0       | 0        | 0        | 0       | 0       | 0       | 0       | 0        | 0       | 0       | 0        | 0       | 0       | 0       | 0       | 0       | 0        | 0       | 0       |
| Erwinia             | 2              | 151            | 0        | 0       | 0        | 0        | 0       | 1       | 0       | 0       | 1        | 1       | 0       | 0        | 0       | 1       | 1       | 0       | 1       | 1        | 1       | 1       |
| Erysipelothrix      | 1              | 9              | 0        | 0       | 0        | 0        | 0       | 0       | 0       | 0       | 0        | 0       | 0       | 0        | 0       | 0       | 0       | 0       | 0       | 0        | 0       | 0       |
| Erysipelotrichaceae | 1              | 4              | 0        | 0       | 0        | 0        | 0       | 0       | 0       | 0       | 0        | 0       | 0       | 0        | 0       | 0       | 0       | 0       | 0       | 0        | 0       | 0       |
| Erythrobacter       | 2              | 80             | 0        | 0       | 0        | 0        | 1       | 0       | 0       | 0       | 0        | 0       | 0       | 0        | 0       | 1       | 1       | 0       | 1       | 0        | 0       | 0       |
| Escherichia         | 2              | 242            | 0        | 0       | 1        | 0        | 1       | 0       | 1       | 1       | 1        | 1       | 0       | 0        | 1       | 1       | 1       | 1       | 0       | 0        | 0       | 1       |
| Ethanoligenens      | 2              | 69             | 0        | 0       | 0        | 0        | 0       | 1       | 0       | 1       | 1        | 1       | 0       | 0        | 1       | 1       | 1       | 0       | 0       | 0        | 0       | 1       |
| Eubacteriaceae      | 1              | 2              | 0        | 0       | 0        | 0        | 0       | 0       | 0       | 0       | 0        | 0       | 0       | 0        | 0       | 0       | 0       | 0       | 0       | 0        | 0       | 0       |
| Eubacterium         | 2              | 103            | 0        | 0       | 1        | 0        | 0       | 1       | 0       | 0       | 0        | 1       | 0       | 0        | 1       | 1       | 1       | 0       | 0       | 0        | 0       | 1       |
| Eudoraea            | 1              | 4              | 0        | 0       | 0        | 0        | 0       | 0       | 0       | 0       | 0        | 0       | 0       | 0        | 0       | 0       | 0       | 0       | 0       | 0        | 0       | 0       |
| Euryarchaeota       | 1              | 1              | 0        | 0       | 0        | 0        | 0       | 0       | 0       | 0       | 0        | 0       | 0       | 0        | 0       | 0       | 0       | 0       | 0       | 0        | 0       | 0       |
| Exiguobacterium     | 2              | 93             | 0        | 0       | 0        | 0        | 0       | 1       | 0       | 0       | 0        | 0       | 0       | 0        | 0       | 1       | 1       | 0       | 0       | 0        | 0       | 1       |
| Faecalibacterium    | 1              | 12             | 0        | 0       | 0        | 0        | 0       | 0       | 0       | 0       | 0        | 0       | 0       | 0        | 0       | 0       | 0       | 0       | 0       | 0        | 0       | 0       |
| Ferrimonas          | 2              | 115            | 0        | 0       | 0        | 0        | 0       | 1       | 0       | 0       | 1        | 0       | 0       | 0        | 0       | 1       | 1       | 0       | 0       | 0        | 0       | 0       |
| Ferroglobus         | 1              | 14             | 0        | 0       | 0        | 0        | 0       | 0       | 0       | 0       | 0        | 0       | 0       | 0        | 0       | 0       | 0       | 0       | 0       | 0        | 0       | 0       |
| Ferroplasma         | 1              | 11             | 0        | 0       | 0        | 0        | 0       | 0       | 0       | 0       | 0        | 0       | 0       | 0        | 0       | 0       | 0       | 0       | 0       | 0        | 0       | 0       |
| Fervidicoccus       | 1              | 7              | 0        | 0       | 0        | 0        | 0       | 0       | 0       | 0       | 0        | 0       | 0       | 0        | 0       | 0       | 0       | 0       | 0       | 0        | 0       | 0       |
| Fervidobacterium    | 2              | 54             | 0        | 0       | 0        | 0        | 0       | 0       | 0       | 0       | 0        | 0       | 0       | 0        | 0       | 0       | 1       | 0       | 0       | 0        | 0       | 1       |
| Fibrella            | 1              | 17             | 0        | 0       | 0        | 0        | 0       | 0       | 0       | 0       | 0        | 0       | 0       | 0        | 0       | 0       | 0       | 0       | 0       | 0        | 0       | 0       |
| Fibrobacter         | 2              | 52             | 0        | 0       | 0        | 0        | 0       | 1       | 0       | 0       | 0        | 0       | 0       | 0        | 0       | 1       | 0       | 0       | 0       | 0        | 0       | 0       |
| Filifactor          | 1              | 9              | 0        | 0       | 0        | 0        | 0       | 0       | 0       | 0       | 0        | 0       | 0       | 0        | 0       | 0       | 0       | 0       | 0       | 0        | 0       | 0       |
| Finegoldia          | 2              | 55             | 0        | 0       | 0        | 0        | 0       | 1       | 0       | 0       | 0        | 0       | 0       | 0        | 0       | 1       | 1       | 0       | 0       | 0        | 0       | 0       |
| Firmicutes          | 1              | 15             | 0        | 0       | 0        | 0        | 0       | 0       | 0       | 0       | 0        | 0       | 0       | 0        | 0       | 0       | 0       | 0       | 0       | 0        | 0       | 0       |
| Fischerella         | 1              | 15             | 0        | 0       | 0        | 0        | 0       | 0       | 0       | 1       | 0        | 0       | 0       | 0        | 0       | 0       | 0       | 0       | 0       | 0        | 0       | 0       |
| Flavobacteria       | 1              | 7              | 0        | 0       | 0        | 0        | 0       | 0       | 0       | 0       | 0        | 0       | 0       | 0        | 0       | 0       | 0       | 0       | 0       | 0        | 0       | 0       |
| Flavobacteriaceae   | 2              | 69             | 0        | 0       | 0        | 0        | 0       | 0       | 0       | 0       | 0        | 0       | 0       | 0        | 0       | 1       | 1       | 0       | 0       | 0        | 0       | 1       |
| Flavobacteriales    | 1              | 3              | 0        | 0       | 0        | 0        | 0       | 0       | 0       | 0       | 0        | 0       | 0       | 0        | 0       | 0       | 0       | 0       | 0       | 0        | 0       | 0       |
| Flavobacterium      | 2              | 103            | 0        | 0       | 1        | 1        | 1       | 1       | 0       | 1       | 0        | 0       | 0       | 0        | 0       | 1       | 1       | 0       | 0       | 0        | 0       | 1       |
| Flexibacter         | 1              | 17             | 0        | 0       | 0        | 0        | 0       | 0       | 0       | 0       | 0        | 0       | 0       | 0        | 0       | 0       | 0       | 0       | 0       | 0        | 0       | 0       |
| Flexistipes         | 1              | 11             | 0        | 0       | 0        | 0        | 0       | 0       | 0       | 0       | 0        | 0       | 0       | 0        | 0       | 0       | 0       | 0       | 0       | 0        | 0       | 0       |
| Fluoribacter        | 1              | 6              | 0        | 0       | 0        | 0        | 0       | 0       | 0       | 0       | 0        | 0       | 0       | 0        | 0       | 0       | 0       | 0       | 0       | 0        | 0       | 0       |
| Fluviicola          | 2              | 69             | 0        | 0       | 0        | 0        | 0       | 1       | 0       | 0       | 0        | 0       | 0       | 0        | 0       | 1       | 1       | 0       | 0       | 0        | 0       | 0       |
| Formosa             | 1              | 2              | 0        | 0       | 0        | 0        | 0       | 0       | 0       | 0       | 0        | 0       | 0       | 0        | 0       | 0       | 0       | 0       | 0       | 0        | 0       | 0       |
| Francisella         | 2              | 88             | 0        | 0       | 0        | 0        | 0       | 1       | 0       | 0       | 1        | 0       | 0       | 0        | 0       | 1       | 1       | 0       | 0       | 0        | 0       | 0       |
| Frankia             | 3              | 202            | 1        | 0       | 1        | 0        | 1       | 1       | 1       | 1       | 1        | 0       | 0       | 0        | 1       | 1       | 1       | 0       | 0       | 1        | 1       | 1       |
| Frateuria           | 1              | 25             | 0        | 0       | 0        | 0        | 0       | 0       | 0       | 0       | 0        | 0       | 0       | 0        | 0       | 0       | 0       | 0       | 0       | 0        | 0       | 0       |
| Fructobacillus      | 1              | 2              | 0        | 0       | 0        | 0        | 0       | 0       | 0       | 0       | 0        | 0       | 0       | 0        | 0       | 0       | 0       | 0       | 0       | 0        | 0       | 0       |
| Fulvimarina         | 1              | 2              | 0        | 0       | 0        | 0        | 0       | 0       | 0       | 1       | 0        | 0       | 0       | 0        | 0       | 0       | 0       | 0       | 0       | 0        | 0       | 0       |
| Fusobacterium       | 1              | 48             | 0        | 0       | 0        | 0        | 0       | 0       | 0       | 0       | 1        | 0       | 0       | 0        | 0       | 0       | 0       | 0       | 0       | 0        | 0       | 0       |
| Gallibacterium      | 2              | 87             | 0        | 0       | 0        | 0        | 0       | 1       | 0       | 0       | 1        | 0       | 0       | 0        | 0       | 1       | 1       | 0       | 0       | 0        | 0       | 1       |
| Gallionella         | 2              | 67             | 0        | 0       | 0        | 0        | 0       | 1       | 0       | 0       | 1        | 0       | 0       | 0        | 0       | 1       | 0       | 0       | 0       | 0        | 0       | 0       |
| Gammaproteobacteria | 1              | 9              | 0        | 0       | 0        | 0        | 0       | 0       | 0       | 0       | 0        | 0       | 0       | 0        | 0       | 0       | 0       | 0       | 0       | 0        | 0       | 0       |
| Gardnerella         | 1              | 31             | 1        | 0       | 0        | 0        | 0       | 0       | 0       | 0       | 0        | 0       | 0       | 0        | 0       | 1       | 0       | 0       | 0       | 0        | 0       | 0       |
| Geitlerinema        | 1              | 9              | 0        | 0       | 0        | 0        | 0       | 0       | 0       | 0       | 0        | 0       | 0       | 0        | 0       | 0       | 0       | 0       | 0       | 0        | 0       | 0       |
| Gemmatimonas        | 2              | 93             | 0        | 0       | 0        | 0        | 0       | 1       | 0       | 0       | 0        | 0       | 0       | 0        | 0       | 1       | 1       | 0       | 0       | 0        | 0       | 0       |
| Geobacillus         | 2              | 168            | 0        | 1       | 0        | 0        | 0       | 1       | 1       | 1       | 1        | 1       | 0       | 0        | 1       | 1       | 1       | 1       | 0       | 0        | 1       | 1       |
| Geobacter           | 2              | 150            | 0        | 0       | 0        | 0        | 0       | 1       | 1       | 0       | 1        | 0       | 0       | 0        | 0       | 1       | 0       | 0       | 0       | 0        | 1       | 0       |
| Geodermatophilus    | 2              | 136            | 1        | 0       | 0        | 0        | 1       | 0       | 0       | 1       | 1        | 0       | 0       | 0        | 0       | 1       | 1       | 0       | 0       | 0        | 1       | 1       |
| Geopsychrobacter    | 1              | 2              | 0        | 0       | 0        | 0        | 0       | 0       | 0       | 0       | 0        | 0       | 0       | 0        | 0       | 0       | 0       | 0       | 0       | 0        | 0       | 0       |
| Gillisia            | 1              | 11             | 0        | 0       | 0        | 0        | 0       | 0       | 1       | 0       | 0        | 0       | 0       | 0        | 0       | 0       | 0       | 0       | 0       | 0        | 0       | 0       |
| Gilvimarinus        | 1              | 4              | 0        | 0       | 0        | 0        | 0       | 0       | 1       | 0       | 0        | 0       | 0       | 0        | 0       | 0       | 0       | 0       | 0       | 0        | 0       | 0       |
| Glaciecola          | 2              | 117            | 0        | 0       | 0        | 0        | 0       | 0       | 0       | 1       | 0        | 0       | 0       | 0        | 0       | 1       | 1       | 1       | 0       | 0        | 0       | 0       |

| Genus             | Cluster Number | Protein Counts | 3.1.3.41 | 3.1.8.1 | 3.2.1.31 | 3.3.2.10 | 3.3.2.9 | 3.5.1.- | 3.5.1.4 | 3.5.1.5 | 3.5.1.54 | 3.5.1.6 | 3.5.2.- | 3.5.2.15 | 3.5.2.2 | 3.5.4.- | 3.5.4.5 | 3.5.5.1 | 3.5.5.7 | 3.5.99.3 | 3.6.1.7 | 3.7.1.- |
|-------------------|----------------|----------------|----------|---------|----------|----------|---------|---------|---------|---------|----------|---------|---------|----------|---------|---------|---------|---------|---------|----------|---------|---------|
| Gloeobacter       | 2              | 67             | 0        | 0       | 0        | 0        | 1       | 1       | 0       | 0       | 1        | 0       | 0       | 0        | 0       | 1       | 0       | 0       | 0       | 0        | 1       | 0       |
| Gloeocapsa        | 1              | 20             | 0        | 0       | 0        | 0        | 0       | 0       | 0       | 0       | 0        | 0       | 0       | 0        | 0       | 0       | 0       | 0       | 0       | 0        | 0       | 0       |
| Gloeotheca        | 1              | 1              | 0        | 0       | 0        | 0        | 0       | 0       | 0       | 0       | 0        | 0       | 0       | 0        | 0       | 0       | 0       | 0       | 0       | 0        | 0       | 0       |
| Gluconacetobacter | 2              | 96             | 0        | 0       | 0        | 0        | 1       | 0       | 0       | 0       | 1        | 1       | 0       | 0        | 1       | 1       | 1       | 0       | 1       | 0        | 0       | 1       |
| Gluconobacter     | 2              | 76             | 0        | 0       | 0        | 0        | 0       | 0       | 0       | 0       | 1        | 0       | 0       | 0        | 0       | 1       | 0       | 0       | 0       | 0        | 0       | 0       |
| Gordonia          | 1              | 158            | 1        | 0       | 0        | 0        | 1       | 1       | 1       | 1       | 1        | 0       | 0       | 0        | 0       | 1       | 1       | 0       | 0       | 0        | 0       | 1       |
| Gordonibacter     | 1              | 32             | 0        | 0       | 0        | 0        | 0       | 0       | 1       | 0       | 1        | 0       | 0       | 0        | 0       | 0       | 0       | 0       | 0       | 0        | 0       | 0       |
| Gramella          | 2              | 104            | 0        | 0       | 0        | 0        | 0       | 0       | 1       | 0       | 1        | 0       | 0       | 0        | 0       | 1       | 1       | 0       | 0       | 0        | 0       | 1       |
| Granulibacter     | 2              | 90             | 0        | 0       | 0        | 0        | 1       | 0       | 1       | 1       | 1        | 1       | 0       | 0        | 0       | 1       | 1       | 0       | 0       | 0        | 0       | 1       |
| Granulicella      | 2              | 98             | 0        | 0       | 0        | 0        | 1       | 1       | 0       | 0       | 1        | 0       | 0       | 0        | 1       | 1       | 1       | 0       | 0       | 0        | 0       | 1       |
| Grimontia         | 1              | 9              | 0        | 0       | 0        | 0        | 0       | 0       | 0       | 0       | 0        | 0       | 0       | 0        | 0       | 0       | 0       | 0       | 0       | 0        | 0       | 0       |
| Haemophilus       | 2              | 117            | 0        | 0       | 1        | 0        | 0       | 1       | 0       | 1       | 1        | 0       | 0       | 0        | 0       | 1       | 1       | 0       | 0       | 0        | 0       | 1       |
| Hafnia            | 1              | 29             | 0        | 0       | 0        | 0        | 0       | 0       | 0       | 0       | 0        | 0       | 0       | 0        | 0       | 0       | 0       | 0       | 0       | 0        | 0       | 0       |
| Hahella           | 3              | 130            | 0        | 0       | 0        | 0        | 0       | 0       | 0       | 1       | 0        | 0       | 0       | 0        | 0       | 1       | 0       | 0       | 0       | 0        | 0       | 1       |
| Halalkalicoccus   | 1              | 18             | 0        | 0       | 0        | 0        | 0       | 0       | 0       | 0       | 0        | 0       | 0       | 0        | 0       | 0       | 0       | 0       | 0       | 0        | 0       | 0       |
| Halanaerobium     | 2              | 89             | 0        | 0       | 1        | 0        | 0       | 1       | 1       | 0       | 0        | 0       | 0       | 0        | 1       | 1       | 1       | 1       | 0       | 0        | 0       | 1       |
| Haliangium        | 2              | 108            | 0        | 0       | 0        | 0        | 1       | 1       | 0       | 1       | 0        | 0       | 0       | 0        | 1       | 1       | 1       | 0       | 1       | 0        | 1       | 1       |
| Haliscomenobacter | 2              | 107            | 0        | 0       | 0        | 0        | 0       | 1       | 0       | 0       | 1        | 0       | 0       | 0        | 0       | 1       | 1       | 0       | 0       | 0        | 0       | 1       |
| Haloarcula        | 1              | 22             | 0        | 0       | 0        | 0        | 0       | 0       | 0       | 0       | 0        | 0       | 0       | 0        | 0       | 0       | 0       | 0       | 0       | 0        | 0       | 0       |
| Halobacillus      | 1              | 19             | 0        | 0       | 0        | 0        | 0       | 0       | 0       | 0       | 0        | 0       | 0       | 0        | 0       | 0       | 0       | 0       | 0       | 0        | 0       | 0       |
| Halobacteriaceae  | 1              | 1              | 0        | 0       | 0        | 0        | 0       | 0       | 0       | 0       | 0        | 0       | 0       | 0        | 0       | 0       | 0       | 0       | 0       | 0        | 0       | 0       |
| Halobacterium     | 1              | 10             | 0        | 0       | 0        | 0        | 0       | 0       | 0       | 0       | 0        | 0       | 0       | 0        | 0       | 0       | 0       | 0       | 0       | 0        | 0       | 0       |
| Halobacteroides   | 1              | 14             | 0        | 0       | 0        | 0        | 0       | 0       | 0       | 0       | 0        | 0       | 0       | 0        | 0       | 0       | 0       | 0       | 0       | 0        | 0       | 0       |
| Haloferax         | 1              | 20             | 0        | 0       | 0        | 0        | 0       | 0       | 0       | 0       | 0        | 0       | 0       | 0        | 0       | 0       | 0       | 0       | 0       | 0        | 0       | 0       |
| Halogeometricum   | 1              | 12             | 0        | 0       | 0        | 0        | 0       | 0       | 0       | 0       | 0        | 0       | 0       | 0        | 0       | 0       | 0       | 0       | 0       | 0        | 0       | 0       |
| Halomicrobium     | 1              | 10             | 0        | 0       | 0        | 0        | 0       | 0       | 0       | 0       | 0        | 0       | 0       | 0        | 0       | 0       | 0       | 0       | 0       | 0        | 0       | 0       |
| Halomonas         | 1              | 149            | 0        | 0       | 0        | 0        | 0       | 1       | 0       | 1       | 1        | 1       | 0       | 0        | 0       | 1       | 1       | 0       | 0       | 0        | 0       | 1       |
| Halopiger         | 1              | 16             | 0        | 0       | 0        | 0        | 0       | 0       | 0       | 0       | 0        | 0       | 0       | 0        | 0       | 0       | 0       | 0       | 0       | 0        | 0       | 0       |
| Haloquadratum     | 1              | 19             | 0        | 0       | 0        | 0        | 0       | 0       | 0       | 0       | 0        | 0       | 0       | 0        | 0       | 0       | 0       | 0       | 0       | 0        | 0       | 0       |
| Halorhabdus       | 1              | 10             | 0        | 0       | 0        | 0        | 0       | 0       | 0       | 0       | 0        | 0       | 0       | 0        | 0       | 0       | 0       | 0       | 0       | 0        | 0       | 0       |
| Halorhodospira    | 2              | 71             | 0        | 0       | 0        | 0        | 0       | 0       | 1       | 0       | 1        | 0       | 0       | 0        | 0       | 1       | 0       | 0       | 0       | 0        | 0       | 1       |
| Halorubrum        | 1              | 16             | 0        | 0       | 0        | 0        | 0       | 0       | 0       | 0       | 0        | 0       | 0       | 0        | 0       | 0       | 0       | 0       | 0       | 0        | 0       | 0       |
| Haloterrigena     | 1              | 19             | 0        | 0       | 0        | 0        | 0       | 0       | 0       | 0       | 0        | 0       | 0       | 0        | 0       | 0       | 0       | 0       | 0       | 0        | 0       | 0       |
| Halothece         | 1              | 9              | 0        | 0       | 0        | 0        | 0       | 0       | 0       | 0       | 0        | 0       | 0       | 0        | 0       | 0       | 0       | 0       | 0       | 0        | 0       | 0       |
| Halothermothrix   | 2              | 50             | 0        | 0       | 0        | 0        | 0       | 1       | 1       | 0       | 0        | 0       | 0       | 0        | 0       | 0       | 1       | 0       | 0       | 0        | 0       | 1       |
| Halothiobacillus  | 2              | 65             | 0        | 0       | 0        | 0        | 0       | 1       | 1       | 0       | 1        | 0       | 0       | 0        | 0       | 1       | 0       | 0       | 0       | 1        | 0       | 0       |
| Halovivax         | 1              | 12             | 0        | 0       | 0        | 0        | 0       | 0       | 0       | 0       | 0        | 0       | 0       | 0        | 0       | 0       | 0       | 0       | 0       | 0        | 0       | 0       |
| Helicobacter      | 2              | 79             | 0        | 0       | 0        | 0        | 0       | 1       | 1       | 1       | 1        | 0       | 0       | 0        | 0       | 0       | 0       | 0       | 0       | 0        | 0       | 1       |
| Heliobacillus     | 1              | 4              | 0        | 0       | 0        | 0        | 0       | 0       | 0       | 0       | 0        | 0       | 0       | 0        | 0       | 0       | 0       | 0       | 0       | 0        | 0       | 0       |
| Heliobacterium    | 2              | 51             | 0        | 0       | 0        | 0        | 0       | 1       | 0       | 0       | 1        | 0       | 0       | 0        | 1       | 1       | 1       | 0       | 0       | 0        | 0       | 0       |
| Herbaspirillum    | 2              | 172            | 0        | 0       | 0        | 0        | 1       | 1       | 1       | 1       | 1        | 1       | 0       | 0        | 0       | 1       | 0       | 0       | 0       | 1        | 0       | 1       |
| Herminiimonas     | 3              | 89             | 0        | 0       | 0        | 0        | 0       | 0       | 0       | 0       | 0        | 0       | 0       | 0        | 0       | 1       | 0       | 0       | 0       | 0        | 0       | 0       |
| Herpetosiphon     | 3              | 90             | 0        | 0       | 0        | 0        | 0       | 1       | 0       | 1       | 1        | 0       | 0       | 0        | 0       | 0       | 1       | 0       | 0       | 0        | 0       | 1       |
| Hippea            | 2              | 44             | 0        | 0       | 0        | 0        | 0       | 1       | 0       | 0       | 0        | 0       | 0       | 0        | 0       | 0       | 0       | 0       | 0       | 0        | 1       | 0       |
| Hirschia          | 2              | 102            | 0        | 0       | 0        | 0        | 0       | 0       | 0       | 1       | 1        | 0       | 0       | 0        | 0       | 1       | 0       | 0       | 0       | 0        | 0       | 1       |
| Histophilus       | 2              | 72             | 0        | 0       | 1        | 0        | 0       | 0       | 0       | 0       | 1        | 0       | 0       | 0        | 0       | 1       | 1       | 0       | 0       | 0        | 0       | 1       |
| Hoeflea           | 1              | 16             | 0        | 0       | 0        | 0        | 0       | 0       | 0       | 1       | 0        | 0       | 0       | 0        | 0       | 0       | 0       | 0       | 0       | 0        | 0       | 0       |
| Hydrogenivirga    | 1              | 2              | 0        | 0       | 0        | 0        | 0       | 0       | 0       | 0       | 0        | 0       | 0       | 0        | 0       | 0       | 0       | 0       | 0       | 0        | 0       | 0       |
| Hydrogenobacter   | 2              | 55             | 0        | 0       | 0        | 0        | 0       | 0       | 0       | 0       | 0        | 0       | 0       | 0        | 0       | 1       | 0       | 0       | 0       | 0        | 1       | 0       |
| Hydrogenobaculum  | 2              | 44             | 0        | 0       | 0        | 0        | 0       | 1       | 0       | 0       | 0        | 0       | 0       | 0        | 0       | 1       | 0       | 0       | 0       | 0        | 1       | 0       |
| Hydrogenophaga    | 1              | 9              | 0        | 0       | 0        | 0        | 0       | 0       | 0       | 0       | 0        | 0       | 0       | 0        | 0       | 0       | 0       | 0       | 0       | 0        | 0       | 0       |
| Hylemonella       | 1              | 4              | 0        | 0       | 0        | 0        | 0       | 0       | 0       | 0       | 0        | 0       | 0       | 0        | 0       | 0       | 0       | 0       | 0       | 0        | 0       | 0       |

| Genus                        | Cluster Number | Protein Counts | 3.1.3.41 | 3.1.8.1 | 3.2.1.31 | 3.3.2.10 | 3.3.2.9 | 3.5.1.- | 3.5.1.4 | 3.5.1.5 | 3.5.1.54 | 3.5.1.6 | 3.5.2.- | 3.5.2.15 | 3.5.2.2 | 3.5.4.- | 3.5.4.5 | 3.5.5.1 | 3.5.5.7 | 3.5.99.3 | 3.6.1.7 | 3.7.1.- |
|------------------------------|----------------|----------------|----------|---------|----------|----------|---------|---------|---------|---------|----------|---------|---------|----------|---------|---------|---------|---------|---------|----------|---------|---------|
| <b>Hyperthermus</b>          | 1              | 6              | 0        | 0       | 0        | 0        | 0       | 0       | 0       | 0       | 0        | 0       | 0       | 0        | 0       | 0       | 0       | 0       | 0       | 0        | 0       | 0       |
| <b>Hyphomicrobium</b>        | 2              | 93             | 0        | 0       | 0        | 0        | 0       | 1       | 0       | 1       | 0        | 0       | 0       | 0        | 0       | 1       | 0       | 0       | 0       | 0        | 0       | 0       |
| <b>Hyphomonas</b>            | 3              | 105            | 0        | 0       | 0        | 0        | 1       | 0       | 0       | 0       | 1        | 0       | 0       | 0        | 0       | 1       | 1       | 0       | 0       | 0        | 0       | 1       |
| <b>Ideonella</b>             | 1              | 18             | 0        | 0       | 0        | 0        | 0       | 0       | 0       | 1       | 0        | 0       | 0       | 0        | 0       | 0       | 0       | 0       | 0       | 0        | 0       | 0       |
| <b>Idiomarina</b>            | 2              | 86             | 0        | 0       | 0        | 0        | 0       | 0       | 0       | 0       | 1        | 0       | 0       | 0        | 0       | 1       | 0       | 0       | 0       | 0        | 0       | 1       |
| <b>Ignavibacterium</b>       | 1              | 14             | 0        | 0       | 0        | 0        | 0       | 0       | 0       | 0       | 0        | 0       | 0       | 0        | 0       | 0       | 0       | 0       | 0       | 0        | 0       | 0       |
| <b>Ignicoccus</b>            | 1              | 5              | 0        | 0       | 0        | 0        | 0       | 0       | 0       | 0       | 0        | 0       | 0       | 0        | 0       | 0       | 0       | 0       | 0       | 0        | 0       | 0       |
| <b>Ignisphaera</b>           | 1              | 8              | 0        | 0       | 0        | 0        | 0       | 0       | 0       | 0       | 0        | 0       | 0       | 0        | 0       | 0       | 0       | 0       | 0       | 0        | 0       | 0       |
| <b>Ilyobacter</b>            | 2              | 85             | 0        | 0       | 0        | 0        | 0       | 1       | 1       | 0       | 1        | 0       | 0       | 0        | 1       | 0       | 1       | 0       | 0       | 0        | 0       | 1       |
| <b>Intrasporangium</b>       | 2              | 114            | 1        | 0       | 0        | 0        | 1       | 0       | 1       | 0       | 1        | 0       | 0       | 0        | 0       | 1       | 1       | 0       | 0       | 0        | 0       | 1       |
| <b>Isoptericola</b>          | 1              | 18             | 0        | 0       | 0        | 0        | 0       | 0       | 0       | 0       | 0        | 0       | 0       | 0        | 0       | 0       | 0       | 0       | 0       | 0        | 0       | 0       |
| <b>Isosphaera</b>            | 2              | 75             | 0        | 0       | 0        | 0        | 0       | 0       | 0       | 0       | 1        | 0       | 0       | 0        | 0       | 1       | 1       | 0       | 0       | 0        | 0       | 0       |
| <b>Jannaschia</b>            | 3              | 151            | 0        | 0       | 0        | 0        | 1       | 1       | 1       | 1       | 1        | 1       | 0       | 0        | 1       | 1       | 1       | 1       | 0       | 0        | 0       | 1       |
| <b>Janthinobacterium</b>     | 2              | 99             | 0        | 0       | 0        | 0        | 1       | 1       | 0       | 1       | 1        | 0       | 0       | 0        | 0       | 1       | 0       | 1       | 0       | 1        | 0       | 0       |
| <b>Jonesia</b>               | 2              | 56             | 1        | 0       | 0        | 0        | 1       | 1       | 0       | 0       | 0        | 0       | 0       | 0        | 0       | 1       | 1       | 0       | 0       | 0        | 0       | 0       |
| <b>Joostella</b>             | 1              | 3              | 0        | 0       | 0        | 0        | 0       | 0       | 0       | 0       | 0        | 0       | 0       | 0        | 0       | 0       | 0       | 0       | 0       | 0        | 0       | 0       |
| <b>Kaistia</b>               | 1              | 2              | 0        | 0       | 0        | 0        | 0       | 0       | 0       | 1       | 0        | 0       | 0       | 0        | 0       | 0       | 0       | 0       | 0       | 0        | 0       | 0       |
| <b>Kangiella</b>             | 2              | 84             | 0        | 0       | 0        | 0        | 0       | 1       | 0       | 0       | 1        | 0       | 0       | 0        | 0       | 1       | 0       | 0       | 0       | 0        | 0       | 0       |
| <b>Ketogulonicigenium</b>    | 2              | 102            | 0        | 0       | 0        | 0        | 0       | 1       | 0       | 1       | 1        | 1       | 0       | 0        | 1       | 1       | 1       | 0       | 0       | 0        | 0       | 0       |
| <b>Kineococcus</b>           | 1              | 24             | 0        | 0       | 0        | 0        | 0       | 0       | 0       | 0       | 0        | 0       | 0       | 0        | 0       | 0       | 0       | 0       | 0       | 0        | 0       | 0       |
| <b>Kinetoplastibacterium</b> | 1              | 2              | 0        | 0       | 0        | 0        | 0       | 0       | 0       | 0       | 0        | 0       | 0       | 0        | 0       | 0       | 0       | 0       | 0       | 0        | 0       | 0       |
| <b>Kingella</b>              | 1              | 4              | 0        | 0       | 0        | 0        | 0       | 0       | 0       | 0       | 0        | 0       | 0       | 0        | 0       | 0       | 0       | 0       | 0       | 0        | 0       | 0       |
| <b>Kitasatospora</b>         | 1              | 36             | 0        | 0       | 0        | 0        | 0       | 0       | 0       | 0       | 0        | 0       | 0       | 0        | 0       | 0       | 0       | 0       | 0       | 0        | 0       | 0       |
| <b>Klebsiella</b>            | 3              | 222            | 0        | 0       | 0        | 0        | 1       | 0       | 0       | 1       | 1        | 1       | 0       | 0        | 0       | 1       | 1       | 0       | 0       | 0        | 0       | 1       |
| <b>Kluyvera</b>              | 1              | 1              | 0        | 0       | 0        | 0        | 0       | 0       | 0       | 0       | 0        | 0       | 0       | 0        | 0       | 0       | 0       | 0       | 0       | 0        | 0       | 0       |
| <b>Kocuria</b>               | 2              | 87             | 1        | 0       | 0        | 0        | 1       | 0       | 0       | 1       | 1        | 0       | 0       | 0        | 0       | 1       | 1       | 0       | 0       | 0        | 0       | 1       |
| <b>Kordia</b>                | 1              | 5              | 0        | 0       | 0        | 0        | 0       | 0       | 0       | 0       | 0        | 0       | 0       | 0        | 0       | 0       | 0       | 0       | 0       | 0        | 0       | 0       |
| <b>Kosmotoga</b>             | 2              | 61             | 0        | 0       | 0        | 0        | 0       | 0       | 0       | 0       | 0        | 0       | 0       | 0        | 1       | 0       | 1       | 0       | 0       | 1        | 1       | 1       |
| <b>Kribbella</b>             | 2              | 99             | 1        | 0       | 0        | 0        | 1       | 1       | 0       | 0       | 1        | 0       | 0       | 0        | 1       | 1       | 1       | 1       | 0       | 0        | 0       | 1       |
| <b>Krokinobacter</b>         | 2              | 90             | 0        | 0       | 0        | 0        | 0       | 0       | 0       | 0       | 1        | 0       | 0       | 0        | 0       | 1       | 1       | 0       | 1       | 0        | 0       | 1       |
| <b>Kyrpidia</b>              | 2              | 113            | 0        | 0       | 0        | 0        | 0       | 1       | 1       | 1       | 1        | 0       | 0       | 0        | 0       | 1       | 1       | 0       | 0       | 0        | 1       | 1       |
| <b>Kytococcus</b>            | 2              | 70             | 1        | 0       | 0        | 0        | 0       | 0       | 0       | 0       | 1        | 0       | 0       | 0        | 0       | 1       | 1       | 0       | 0       | 0        | 0       | 1       |
| <b>Labrenzia</b>             | 1              | 4              | 0        | 0       | 0        | 0        | 0       | 0       | 0       | 1       | 0        | 0       | 0       | 0        | 0       | 0       | 0       | 0       | 0       | 0        | 0       | 0       |
| <b>Lachnoanaerobaculum</b>   | 1              | 1              | 0        | 0       | 0        | 0        | 0       | 0       | 0       | 0       | 0        | 0       | 0       | 0        | 0       | 0       | 0       | 0       | 0       | 0        | 0       | 0       |
| <b>Lachnospiraceae</b>       | 1              | 51             | 0        | 0       | 0        | 0        | 0       | 1       | 0       | 0       | 1        | 1       | 0       | 0        | 1       | 0       | 0       | 0       | 0       | 0        | 0       | 1       |
| <b>Lacinutrix</b>            | 1              | 20             | 0        | 0       | 0        | 0        | 0       | 0       | 0       | 0       | 0        | 0       | 0       | 0        | 0       | 0       | 0       | 0       | 0       | 0        | 0       | 0       |
| <b>Lactobacillus</b>         | 2              | 119            | 0        | 0       | 1        | 0        | 0       | 1       | 1       | 0       | 1        | 0       | 0       | 0        | 0       | 1       | 1       | 0       | 0       | 0        | 0       | 1       |
| <b>Lactococcus</b>           | 2              | 82             | 0        | 0       | 0        | 0        | 0       | 1       | 0       | 0       | 0        | 0       | 0       | 0        | 0       | 1       | 1       | 0       | 0       | 0        | 0       | 0       |
| <b>Lamprocystis</b>          | 1              | 2              | 0        | 0       | 0        | 0        | 0       | 0       | 0       | 0       | 0        | 0       | 0       | 0        | 0       | 0       | 0       | 0       | 0       | 0        | 0       | 0       |
| <b>Laribacter</b>            | 2              | 80             | 0        | 0       | 0        | 0        | 0       | 0       | 0       | 1       | 0        | 0       | 0       | 0        | 0       | 1       | 0       | 0       | 0       | 0        | 0       | 1       |
| <b>Lawsonia</b>              | 2              | 33             | 0        | 0       | 0        | 0        | 0       | 0       | 0       | 0       | 0        | 0       | 0       | 0        | 0       | 1       | 0       | 0       | 0       | 0        | 0       | 0       |
| <b>Leadbetterella</b>        | 2              | 79             | 0        | 0       | 0        | 0        | 0       | 1       | 0       | 0       | 1        | 1       | 0       | 0        | 0       | 1       | 1       | 0       | 0       | 0        | 0       | 1       |
| <b>Leeuwenhoekiella</b>      | 1              | 2              | 0        | 0       | 0        | 0        | 0       | 0       | 0       | 0       | 0        | 0       | 0       | 0        | 0       | 0       | 0       | 0       | 0       | 0        | 0       | 0       |
| <b>Legionella</b>            | 2              | 117            | 0        | 0       | 0        | 0        | 0       | 0       | 1       | 0       | 0        | 0       | 0       | 0        | 0       | 1       | 1       | 0       | 0       | 0        | 0       | 1       |
| <b>Leifsonia</b>             | 2              | 48             | 1        | 0       | 0        | 0        | 0       | 0       | 0       | 0       | 0        | 0       | 0       | 0        | 0       | 1       | 1       | 0       | 0       | 0        | 0       | 0       |
| <b>Leptolyngbya</b>          | 1              | 10             | 0        | 0       | 0        | 0        | 0       | 0       | 0       | 1       | 0        | 0       | 0       | 0        | 0       | 0       | 0       | 0       | 0       | 0        | 0       | 0       |
| <b>Leptospira</b>            | 2              | 76             | 0        | 0       | 0        | 0        | 1       | 0       | 0       | 0       | 0        | 0       | 0       | 0        | 0       | 1       | 0       | 0       | 0       | 0        | 0       | 1       |
| <b>Leptospirillum</b>        | 1              | 10             | 0        | 0       | 0        | 0        | 0       | 0       | 0       | 0       | 0        | 0       | 0       | 0        | 0       | 0       | 0       | 0       | 0       | 0        | 0       | 0       |
| <b>Leptothrix</b>            | 3              | 186            | 0        | 0       | 0        | 0        | 0       | 0       | 0       | 1       | 1        | 0       | 0       | 0        | 0       | 1       | 0       | 0       | 0       | 0        | 0       | 1       |
| <b>Leptotrichia</b>          | 2              | 43             | 0        | 0       | 0        | 0        | 0       | 1       | 0       | 0       | 0        | 0       | 0       | 0        | 0       | 0       | 1       | 0       | 0       | 0        | 0       | 0       |
| <b>Leucobacter</b>           | 1              | 2              | 0        | 0       | 0        | 0        | 0       | 0       | 0       | 0       | 0        | 0       | 0       | 0        | 0       | 0       | 0       | 0       | 0       | 0        | 0       | 0       |
| <b>Leuconostoc</b>           | 2              | 64             | 0        | 0       | 0        | 0        | 0       | 0       | 1       | 0       | 1        | 1       | 0       | 0        | 0       | 1       | 1       | 0       | 0       | 0        | 0       | 1       |

| Genus                | Cluster Number | Protein Counts | 3.1.3.41 | 3.1.8.1 | 3.2.1.31 | 3.3.2.10 | 3.3.2.9 | 3.5.1.- | 3.5.1.4 | 3.5.1.5 | 3.5.1.54 | 3.5.1.6 | 3.5.2.- | 3.5.2.15 | 3.5.2.2 | 3.5.4.- | 3.5.4.5 | 3.5.5.1 | 3.5.5.7 | 3.5.99.3 | 3.6.1.7 | 3.7.1.- |
|----------------------|----------------|----------------|----------|---------|----------|----------|---------|---------|---------|---------|----------|---------|---------|----------|---------|---------|---------|---------|---------|----------|---------|---------|
| Liberibacter         | 1              | 4              | 0        | 0       | 0        | 0        | 0       | 0       | 0       | 0       | 0        | 0       | 0       | 0        | 0       | 0       | 0       | 0       | 0       | 0        | 0       | 0       |
| Limnohabitans        | 1              | 11             | 0        | 0       | 0        | 0        | 0       | 0       | 0       | 1       | 0        | 0       | 0       | 0        | 0       | 0       | 0       | 0       | 0       | 0        | 0       | 0       |
| Listeria             | 2              | 77             | 0        | 0       | 0        | 0        | 0       | 1       | 1       | 0       | 0        | 0       | 0       | 0        | 0       | 1       | 1       | 0       | 0       | 0        | 0       | 1       |
| Listeriaceae         | 1              | 6              | 0        | 0       | 0        | 0        | 0       | 0       | 0       | 0       | 0        | 0       | 0       | 0        | 0       | 0       | 0       | 0       | 0       | 0        | 0       | 0       |
| Listonella           | 1              | 38             | 0        | 0       | 0        | 0        | 0       | 0       | 0       | 0       | 0        | 0       | 0       | 0        | 0       | 0       | 0       | 0       | 0       | 0        | 0       | 0       |
| Loktanella           | 1              | 3              | 0        | 0       | 0        | 0        | 0       | 0       | 0       | 1       | 0        | 0       | 0       | 0        | 0       | 0       | 0       | 0       | 0       | 0        | 0       | 0       |
| Lysinibacillus       | 2              | 97             | 0        | 0       | 0        | 0        | 0       | 1       | 1       | 1       | 1        | 1       | 0       | 0        | 1       | 1       | 1       | 0       | 0       | 0        | 0       | 0       |
| Macrococcus          | 2              | 60             | 0        | 0       | 0        | 0        | 0       | 0       | 1       | 0       | 1        | 0       | 0       | 0        | 0       | 1       | 1       | 0       | 0       | 0        | 0       | 0       |
| Magnetococcus        | 2              | 64             | 0        | 0       | 0        | 0        | 0       | 0       | 0       | 1       | 0        | 0       | 0       | 0        | 0       | 1       | 0       | 0       | 0       | 0        | 0       | 0       |
| Magnetospirillum     | 2              | 113            | 0        | 0       | 0        | 0        | 0       | 1       | 0       | 0       | 1        | 0       | 0       | 0        | 0       | 1       | 0       | 0       | 0       | 0        | 0       | 0       |
| Mahella              | 2              | 58             | 0        | 0       | 0        | 0        | 0       | 1       | 0       | 0       | 0        | 0       | 0       | 0        | 0       | 1       | 1       | 0       | 0       | 0        | 0       | 1       |
| Mannheimia           | 2              | 85             | 0        | 0       | 0        | 0        | 0       | 0       | 0       | 0       | 0        | 0       | 0       | 0        | 0       | 1       | 1       | 0       | 0       | 0        | 1       | 1       |
| Maribacter           | 3              | 87             | 0        | 0       | 0        | 0        | 0       | 0       | 0       | 0       | 1        | 0       | 0       | 0        | 0       | 1       | 1       | 0       | 1       | 0        | 0       | 1       |
| Maricaulis           | 3              | 87             | 0        | 0       | 0        | 0        | 0       | 0       | 0       | 0       | 0        | 0       | 0       | 0        | 0       | 1       | 0       | 0       | 0       | 0        | 0       | 0       |
| Marichromatium       | 1              | 2              | 0        | 0       | 0        | 0        | 0       | 0       | 0       | 0       | 0        | 0       | 0       | 0        | 0       | 0       | 0       | 0       | 0       | 0        | 0       | 0       |
| Marinithermus        | 2              | 77             | 0        | 0       | 0        | 0        | 0       | 1       | 0       | 0       | 1        | 0       | 0       | 0        | 0       | 1       | 1       | 0       | 0       | 0        | 0       | 1       |
| Marinitoga           | 1              | 15             | 0        | 0       | 0        | 0        | 0       | 0       | 0       | 0       | 0        | 0       | 0       | 0        | 0       | 0       | 0       | 0       | 0       | 0        | 0       | 0       |
| Marinobacter         | 2              | 163            | 0        | 0       | 0        | 0        | 0       | 0       | 1       | 1       | 1        | 0       | 0       | 0        | 0       | 1       | 0       | 0       | 0       | 0        | 1       | 1       |
| Marinomonas          | 3              | 192            | 0        | 0       | 0        | 0        | 0       | 1       | 1       | 1       | 1        | 1       | 0       | 0        | 0       | 1       | 1       | 0       | 0       | 0        | 0       | 1       |
| Maritimibacter       | 1              | 7              | 0        | 0       | 0        | 0        | 0       | 0       | 0       | 1       | 0        | 0       | 0       | 0        | 0       | 0       | 0       | 0       | 0       | 0        | 0       | 0       |
| Marivirga            | 2              | 96             | 0        | 0       | 0        | 0        | 0       | 0       | 0       | 0       | 1        | 0       | 0       | 0        | 0       | 1       | 1       | 1       | 0       | 0        | 0       | 1       |
| Martella             | 1              | 3              | 0        | 0       | 0        | 0        | 0       | 0       | 0       | 1       | 0        | 0       | 0       | 0        | 0       | 0       | 0       | 0       | 0       | 0        | 0       | 0       |
| Marvinbryantia       | 1              | 1              | 0        | 0       | 0        | 0        | 0       | 0       | 0       | 0       | 0        | 0       | 0       | 0        | 0       | 0       | 0       | 0       | 0       | 0        | 0       | 0       |
| Massilia             | 1              | 4              | 0        | 0       | 0        | 0        | 0       | 0       | 0       | 0       | 0        | 0       | 0       | 0        | 0       | 0       | 0       | 0       | 0       | 0        | 0       | 0       |
| Mastigocladopsis     | 1              | 16             | 0        | 0       | 0        | 0        | 0       | 0       | 0       | 1       | 0        | 0       | 0       | 0        | 0       | 0       | 0       | 0       | 0       | 0        | 0       | 0       |
| Megamonas            | 1              | 47             | 0        | 0       | 0        | 0        | 0       | 1       | 0       | 0       | 0        | 0       | 0       | 0        | 0       | 1       | 0       | 0       | 0       | 0        | 1       | 1       |
| Megasphaera          | 1              | 14             | 0        | 0       | 0        | 0        | 0       | 0       | 0       | 0       | 0        | 0       | 0       | 0        | 0       | 0       | 0       | 0       | 0       | 0        | 0       | 0       |
| Meiothermus          | 2              | 110            | 0        | 0       | 0        | 0        | 0       | 1       | 0       | 0       | 1        | 0       | 0       | 0        | 1       | 1       | 1       | 0       | 0       | 0        | 1       | 1       |
| Melissococcus        | 2              | 46             | 0        | 0       | 0        | 0        | 0       | 0       | 0       | 0       | 0        | 0       | 0       | 0        | 0       | 1       | 1       | 0       | 0       | 0        | 0       | 0       |
| Mesoflavibacter      | 1              | 6              | 0        | 0       | 0        | 0        | 0       | 0       | 0       | 0       | 0        | 0       | 0       | 0        | 0       | 0       | 0       | 0       | 0       | 0        | 0       | 0       |
| Mesoplasma           | 1              | 23             | 0        | 0       | 0        | 0        | 0       | 1       | 0       | 0       | 0        | 0       | 0       | 0        | 0       | 1       | 1       | 0       | 0       | 0        | 0       | 0       |
| Mesorhizobium        | 2              | 201            | 0        | 0       | 0        | 0        | 1       | 1       | 1       | 1       | 1        | 1       | 0       | 0        | 1       | 1       | 1       | 0       | 0       | 0        | 1       | 1       |
| Mesotoga             | 1              | 14             | 0        | 0       | 0        | 0        | 0       | 0       | 0       | 0       | 0        | 0       | 0       | 0        | 0       | 0       | 0       | 0       | 0       | 0        | 0       | 0       |
| Metallosphaera       | 1              | 18             | 0        | 0       | 0        | 0        | 0       | 0       | 0       | 0       | 0        | 0       | 0       | 0        | 0       | 0       | 0       | 0       | 0       | 0        | 0       | 0       |
| Methanobacterium     | 1              | 7              | 0        | 0       | 0        | 0        | 0       | 0       | 0       | 0       | 0        | 0       | 0       | 0        | 0       | 0       | 0       | 0       | 0       | 0        | 0       | 0       |
| Methanobrevibacter   | 1              | 9              | 0        | 0       | 0        | 0        | 0       | 0       | 0       | 0       | 0        | 0       | 0       | 0        | 0       | 0       | 0       | 0       | 0       | 0        | 0       | 0       |
| Methanocaldococcus   | 1              | 6              | 0        | 0       | 0        | 0        | 0       | 0       | 0       | 0       | 0        | 0       | 0       | 0        | 0       | 0       | 0       | 0       | 0       | 0        | 0       | 0       |
| Methanocella         | 1              | 15             | 0        | 0       | 0        | 0        | 0       | 0       | 0       | 0       | 0        | 0       | 0       | 0        | 0       | 0       | 0       | 0       | 0       | 0        | 0       | 0       |
| Methanococcaceae     | 1              | 1              | 0        | 0       | 0        | 0        | 0       | 0       | 0       | 0       | 0        | 0       | 0       | 0        | 0       | 0       | 0       | 0       | 0       | 0        | 0       | 0       |
| Methanococcoides     | 1              | 5              | 0        | 0       | 0        | 0        | 0       | 0       | 0       | 0       | 0        | 0       | 0       | 0        | 0       | 0       | 0       | 0       | 0       | 0        | 0       | 0       |
| Methanococcus        | 1              | 9              | 0        | 0       | 0        | 0        | 0       | 0       | 0       | 0       | 0        | 0       | 0       | 0        | 0       | 0       | 0       | 0       | 0       | 0        | 0       | 0       |
| Methanocorpusculum   | 1              | 7              | 0        | 0       | 0        | 0        | 0       | 0       | 0       | 0       | 0        | 0       | 0       | 0        | 0       | 0       | 0       | 0       | 0       | 0        | 0       | 0       |
| Methanoculleus       | 1              | 8              | 0        | 0       | 0        | 0        | 0       | 0       | 0       | 0       | 0        | 0       | 0       | 0        | 0       | 0       | 0       | 0       | 0       | 0        | 0       | 0       |
| Methanohalobium      | 1              | 5              | 0        | 0       | 0        | 0        | 0       | 0       | 0       | 0       | 0        | 0       | 0       | 0        | 0       | 0       | 0       | 0       | 0       | 0        | 0       | 0       |
| Methanohalophilus    | 1              | 5              | 0        | 0       | 0        | 0        | 0       | 0       | 0       | 0       | 0        | 0       | 0       | 0        | 0       | 0       | 0       | 0       | 0       | 0        | 0       | 0       |
| Methanolobus         | 1              | 5              | 0        | 0       | 0        | 0        | 0       | 0       | 0       | 0       | 0        | 0       | 0       | 0        | 0       | 0       | 0       | 0       | 0       | 0        | 0       | 0       |
| Methanomethylovorans | 1              | 5              | 0        | 0       | 0        | 0        | 0       | 0       | 0       | 0       | 0        | 0       | 0       | 0        | 0       | 0       | 0       | 0       | 0       | 0        | 0       | 0       |
| Methanoplanus        | 1              | 7              | 0        | 0       | 0        | 0        | 0       | 0       | 0       | 0       | 0        | 0       | 0       | 0        | 0       | 0       | 0       | 0       | 0       | 0        | 0       | 0       |
| Methanopyrus         | 1              | 4              | 0        | 0       | 0        | 0        | 0       | 0       | 0       | 0       | 0        | 0       | 0       | 0        | 0       | 0       | 0       | 0       | 0       | 0        | 0       | 0       |
| Methanoregula        | 1              | 8              | 0        | 0       | 0        | 0        | 0       | 0       | 0       | 0       | 0        | 0       | 0       | 0        | 0       | 0       | 0       | 0       | 0       | 0        | 0       | 0       |
| Methanosaeta         | 1              | 9              | 0        | 0       | 0        | 0        | 0       | 0       | 0       | 0       | 0        | 0       | 0       | 0        | 0       | 0       | 0       | 0       | 0       | 0        | 0       | 0       |
| Methanosalsum        | 1              | 7              | 0        | 0       | 0        | 0        | 0       | 0       | 0       | 0       | 0        | 0       | 0       | 0        | 0       | 0       | 0       | 0       | 0       | 0        | 0       | 0       |

| Genus               | Cluster Number | Protein Counts | 3.1.3.41 | 3.1.8.1 | 3.2.1.31 | 3.3.2.10 | 3.3.2.9 | 3.5.1.- | 3.5.1.4 | 3.5.1.5 | 3.5.1.54 | 3.5.1.6 | 3.5.2.- | 3.5.2.15 | 3.5.2.2 | 3.5.4.- | 3.5.4.5 | 3.5.5.1 | 3.5.5.7 | 3.5.99.3 | 3.6.1.7 | 3.7.1.- |
|---------------------|----------------|----------------|----------|---------|----------|----------|---------|---------|---------|---------|----------|---------|---------|----------|---------|---------|---------|---------|---------|----------|---------|---------|
| Methanosarcina      | 1              | 18             | 0        | 0       | 0        | 0        | 0       | 0       | 0       | 0       | 0        | 0       | 0       | 0        | 0       | 0       | 0       | 0       | 0       | 0        | 0       | 0       |
| Methanospaera       | 1              | 7              | 0        | 0       | 0        | 0        | 0       | 0       | 0       | 0       | 0        | 0       | 0       | 0        | 0       | 0       | 0       | 0       | 0       | 0        | 0       | 0       |
| Methanospaerula     | 1              | 8              | 0        | 0       | 0        | 0        | 0       | 0       | 0       | 0       | 0        | 0       | 0       | 0        | 0       | 0       | 0       | 0       | 0       | 0        | 0       | 0       |
| Methanospirillum    | 1              | 6              | 0        | 0       | 0        | 0        | 0       | 0       | 0       | 0       | 0        | 0       | 0       | 0        | 0       | 0       | 0       | 0       | 0       | 0        | 0       | 0       |
| Methanothermobacter | 1              | 6              | 0        | 0       | 0        | 0        | 0       | 0       | 0       | 0       | 0        | 0       | 0       | 0        | 0       | 0       | 0       | 0       | 0       | 0        | 0       | 0       |
| Methanothermococcus | 1              | 5              | 0        | 0       | 0        | 0        | 0       | 0       | 0       | 0       | 0        | 0       | 0       | 0        | 0       | 0       | 0       | 0       | 0       | 0        | 0       | 0       |
| Methanothermus      | 1              | 5              | 0        | 0       | 0        | 0        | 0       | 0       | 0       | 0       | 0        | 0       | 0       | 0        | 0       | 0       | 0       | 0       | 0       | 0        | 0       | 0       |
| Methanotorris       | 1              | 5              | 0        | 0       | 0        | 0        | 0       | 0       | 0       | 0       | 0        | 0       | 0       | 0        | 0       | 0       | 0       | 0       | 0       | 0        | 0       | 0       |
| Methylacidiphilum   | 2              | 48             | 0        | 0       | 0        | 0        | 0       | 0       | 0       | 0       | 0        | 0       | 0       | 0        | 1       | 1       | 0       | 0       | 0       | 0        | 0       | 1       |
| Methylarcula        | 1              | 2              | 0        | 0       | 0        | 0        | 0       | 0       | 0       | 0       | 0        | 0       | 0       | 0        | 0       | 0       | 0       | 0       | 0       | 0        | 0       | 0       |
| Methylibium         | 1              | 38             | 0        | 0       | 0        | 0        | 0       | 0       | 0       | 0       | 0        | 0       | 0       | 0        | 0       | 0       | 0       | 0       | 0       | 0        | 0       | 0       |
| Methylobacillus     | 2              | 61             | 0        | 0       | 0        | 0        | 0       | 0       | 1       | 1       | 0        | 0       | 0       | 0        | 0       | 1       | 0       | 0       | 0       | 0        | 0       | 0       |
| Methylobacterium    | 3              | 236            | 0        | 0       | 0        | 0        | 1       | 1       | 1       | 1       | 1        | 1       | 0       | 1        | 1       | 1       | 1       | 1       | 1       | 1        | 1       | 1       |
| Methylocella        | 3              | 117            | 0        | 0       | 0        | 0        | 0       | 0       | 0       | 1       | 1        | 0       | 0       | 0        | 0       | 1       | 1       | 0       | 1       | 0        | 1       | 0       |
| Methylococcus       | 2              | 80             | 0        | 0       | 0        | 0        | 0       | 0       | 0       | 0       | 1        | 0       | 0       | 0        | 0       | 1       | 0       | 0       | 0       | 0        | 0       | 1       |
| Methylocystis       | 1              | 21             | 0        | 0       | 0        | 0        | 0       | 0       | 0       | 0       | 0        | 0       | 0       | 0        | 0       | 0       | 0       | 0       | 0       | 0        | 0       | 0       |
| Methyloferula       | 1              | 2              | 0        | 0       | 0        | 0        | 0       | 0       | 0       | 0       | 0        | 0       | 0       | 0        | 0       | 0       | 0       | 0       | 0       | 0        | 0       | 0       |
| Methylomicrobium    | 1              | 12             | 0        | 0       | 0        | 0        | 0       | 0       | 0       | 0       | 0        | 0       | 0       | 0        | 0       | 0       | 0       | 0       | 0       | 0        | 0       | 0       |
| Methylomonas        | 1              | 15             | 0        | 0       | 0        | 0        | 0       | 0       | 0       | 0       | 0        | 0       | 0       | 0        | 0       | 0       | 0       | 0       | 0       | 0        | 0       | 0       |
| Methylophaga        | 1              | 7              | 0        | 0       | 0        | 0        | 0       | 0       | 0       | 0       | 0        | 0       | 0       | 0        | 0       | 0       | 0       | 0       | 0       | 0        | 0       | 0       |
| Methylophilus       | 1              | 2              | 0        | 0       | 0        | 0        | 0       | 0       | 0       | 1       | 0        | 0       | 0       | 0        | 0       | 0       | 0       | 0       | 0       | 0        | 0       | 0       |
| Methylosinus        | 1              | 2              | 0        | 0       | 0        | 0        | 0       | 0       | 0       | 0       | 0        | 0       | 0       | 0        | 0       | 0       | 0       | 0       | 0       | 0        | 0       | 0       |
| Methylotenera       | 2              | 72             | 0        | 0       | 0        | 0        | 0       | 1       | 0       | 1       | 1        | 0       | 0       | 0        | 0       | 1       | 0       | 0       | 0       | 0        | 0       | 0       |
| Methyloversatilis   | 1              | 5              | 0        | 0       | 0        | 0        | 0       | 0       | 0       | 0       | 0        | 0       | 0       | 0        | 0       | 0       | 0       | 0       | 0       | 0        | 0       | 0       |
| Methylovorus        | 2              | 66             | 0        | 0       | 0        | 0        | 0       | 0       | 0       | 1       | 1        | 0       | 0       | 0        | 0       | 1       | 0       | 0       | 0       | 0        | 0       | 0       |
| Micavibrio          | 1              | 9              | 0        | 0       | 0        | 0        | 0       | 0       | 0       | 0       | 0        | 0       | 0       | 0        | 0       | 0       | 0       | 0       | 0       | 0        | 0       | 0       |
| Microbacterium      | 2              | 115            | 1        | 0       | 0        | 0        | 1       | 0       | 0       | 0       | 1        | 0       | 0       | 0        | 1       | 1       | 1       | 0       | 0       | 0        | 0       | 1       |
| Microchaete         | 1              | 23             | 0        | 0       | 0        | 0        | 0       | 0       | 0       | 1       | 0        | 0       | 0       | 0        | 0       | 0       | 0       | 0       | 0       | 0        | 0       | 0       |
| Micrococcus         | 2              | 72             | 1        | 0       | 0        | 0        | 1       | 0       | 0       | 1       | 1        | 0       | 0       | 0        | 0       | 1       | 1       | 0       | 0       | 0        | 0       | 0       |
| Microcoleus         | 1              | 17             | 0        | 0       | 0        | 0        | 0       | 0       | 0       | 1       | 0        | 0       | 0       | 0        | 0       | 0       | 0       | 0       | 0       | 0        | 0       | 0       |
| Microcystis         | 2              | 67             | 0        | 0       | 0        | 0        | 0       | 0       | 0       | 1       | 0        | 0       | 0       | 0        | 0       | 1       | 1       | 0       | 0       | 0        | 0       | 1       |
| Microlunatus        | 1              | 25             | 0        | 0       | 0        | 0        | 0       | 0       | 0       | 0       | 0        | 0       | 0       | 0        | 0       | 0       | 0       | 0       | 0       | 0        | 0       | 0       |
| Micromonospora      | 2              | 115            | 1        | 0       | 0        | 0        | 1       | 1       | 1       | 1       | 1        | 0       | 0       | 0        | 0       | 1       | 1       | 0       | 0       | 0        | 0       | 0       |
| Microvirga          | 1              | 6              | 0        | 0       | 0        | 0        | 0       | 0       | 0       | 0       | 0        | 0       | 0       | 0        | 0       | 0       | 0       | 0       | 0       | 0        | 0       | 0       |
| Mobiluncus          | 1              | 41             | 0        | 0       | 0        | 0        | 0       | 1       | 0       | 0       | 0        | 0       | 0       | 0        | 0       | 1       | 0       | 0       | 0       | 0        | 0       | 0       |
| Modestobacter       | 1              | 43             | 0        | 0       | 0        | 0        | 0       | 0       | 0       | 0       | 0        | 0       | 0       | 0        | 0       | 0       | 0       | 0       | 0       | 0        | 0       | 0       |
| Moorea              | 1              | 2              | 0        | 0       | 0        | 0        | 0       | 0       | 0       | 0       | 0        | 0       | 0       | 0        | 0       | 0       | 0       | 0       | 0       | 0        | 0       | 0       |
| Moorella            | 2              | 69             | 0        | 0       | 0        | 0        | 0       | 0       | 0       | 0       | 0        | 0       | 0       | 0        | 1       | 1       | 1       | 0       | 0       | 0        | 0       | 1       |
| Moraxella           | 2              | 66             | 0        | 0       | 0        | 0        | 0       | 1       | 0       | 0       | 0        | 0       | 0       | 0        | 0       | 1       | 0       | 0       | 0       | 0        | 0       | 0       |
| Morganella          | 1              | 29             | 0        | 0       | 0        | 0        | 0       | 0       | 0       | 0       | 0        | 0       | 0       | 0        | 0       | 0       | 0       | 0       | 0       | 0        | 0       | 0       |
| Moritella           | 1              | 2              | 0        | 0       | 0        | 0        | 0       | 0       | 0       | 0       | 0        | 0       | 0       | 0        | 0       | 0       | 0       | 0       | 0       | 0        | 0       | 0       |
| Muricauda           | 1              | 23             | 0        | 0       | 0        | 0        | 0       | 0       | 0       | 0       | 0        | 0       | 0       | 0        | 0       | 0       | 0       | 0       | 0       | 0        | 0       | 1       |
| Mycobacterium       | 3              | 306            | 1        | 0       | 0        | 0        | 1       | 1       | 1       | 1       | 1        | 1       | 0       | 0        | 1       | 1       | 1       | 0       | 1       | 0        | 1       | 1       |
| Mycoplasma          | 1              | 53             | 0        | 0       | 0        | 0        | 0       | 0       | 0       | 0       | 0        | 0       | 0       | 0        | 0       | 1       | 1       | 0       | 0       | 0        | 0       | 1       |
| Myxococcus          | 2              | 110            | 0        | 0       | 0        | 0        | 1       | 1       | 0       | 0       | 1        | 0       | 0       | 0        | 0       | 1       | 1       | 0       | 0       | 0        | 0       | 1       |
| Nakamurella         | 2              | 115            | 1        | 0       | 0        | 0        | 1       | 1       | 0       | 1       | 1        | 0       | 0       | 0        | 0       | 1       | 1       | 0       | 0       | 0        | 0       | 1       |
| napthalene          | 1              | 2              | 0        | 0       | 0        | 0        | 0       | 0       | 0       | 0       | 0        | 0       | 0       | 0        | 0       | 0       | 0       | 0       | 0       | 0        | 0       | 0       |
| Natranaerobius      | 2              | 55             | 0        | 0       | 0        | 0        | 0       | 1       | 1       | 0       | 1        | 0       | 0       | 0        | 0       | 1       | 1       | 1       | 0       | 0        | 0       | 1       |
| Natrialba           | 1              | 16             | 0        | 0       | 0        | 0        | 0       | 0       | 0       | 0       | 0        | 0       | 0       | 0        | 0       | 0       | 0       | 0       | 0       | 0        | 0       | 0       |
| Natrinema           | 1              | 16             | 0        | 0       | 0        | 0        | 0       | 0       | 0       | 0       | 0        | 0       | 0       | 0        | 0       | 0       | 0       | 0       | 0       | 0        | 0       | 0       |
| Natronobacterium    | 1              | 11             | 0        | 0       | 0        | 0        | 0       | 0       | 0       | 0       | 0        | 0       | 0       | 0        | 0       | 0       | 0       | 0       | 0       | 0        | 0       | 0       |
| Natronococcus       | 1              | 21             | 0        | 0       | 0        | 0        | 0       | 0       | 0       | 0       | 0        | 0       | 0       | 0        | 0       | 0       | 0       | 0       | 0       | 0        | 0       | 0       |

| Genus             | Cluster Number | Protein Counts | 3.1.3.41 | 3.1.8.1 | 3.2.1.31 | 3.3.2.10 | 3.3.2.9 | 3.5.1.- | 3.5.1.4 | 3.5.1.5 | 3.5.1.54 | 3.5.1.6 | 3.5.2.- | 3.5.2.15 | 3.5.2.2 | 3.5.4.- | 3.5.4.5 | 3.5.5.1 | 3.5.5.7 | 3.5.99.3 | 3.6.1.7 | 3.7.1.- |   |
|-------------------|----------------|----------------|----------|---------|----------|----------|---------|---------|---------|---------|----------|---------|---------|----------|---------|---------|---------|---------|---------|----------|---------|---------|---|
| Natronomonas      | 1              | 20             | 0        | 0       | 0        | 0        | 0       | 0       | 0       | 0       | 0        | 0       | 0       | 0        | 0       | 0       | 0       | 0       | 0       | 0        | 0       | 0       |   |
| Nautilia          | 2              | 48             | 0        | 0       | 0        | 0        | 0       | 0       | 0       | 0       | 1        | 0       | 0       | 0        | 0       | 0       | 0       | 0       | 0       | 0        | 0       | 1       | 0 |
| Neisseria         | 2              | 67             | 0        | 0       | 0        | 0        | 0       | 0       | 0       | 0       | 1        | 0       | 0       | 0        | 0       | 1       | 0       | 0       | 0       | 0        | 0       | 0       | 0 |
| Neisseriaceae     | 1              | 1              | 0        | 0       | 0        | 0        | 0       | 0       | 0       | 0       | 0        | 0       | 0       | 0        | 0       | 0       | 0       | 0       | 0       | 0        | 0       | 0       | 0 |
| Neorickettsia     | 1              | 31             | 0        | 0       | 0        | 0        | 0       | 0       | 0       | 0       | 0        | 0       | 0       | 0        | 0       | 1       | 0       | 0       | 0       | 0        | 0       | 0       | 0 |
| Neptuniibacter    | 1              | 2              | 0        | 0       | 0        | 0        | 0       | 0       | 0       | 1       | 0        | 0       | 0       | 0        | 0       | 0       | 0       | 0       | 0       | 0        | 0       | 0       | 0 |
| Niastella         | 1              | 21             | 0        | 0       | 0        | 0        | 0       | 0       | 0       | 0       | 0        | 0       | 0       | 0        | 0       | 0       | 0       | 0       | 0       | 0        | 0       | 0       | 0 |
| Nitratifractor    | 2              | 54             | 0        | 0       | 0        | 0        | 0       | 1       | 1       | 0       | 0        | 0       | 0       | 0        | 0       | 1       | 0       | 0       | 0       | 0        | 0       | 1       | 0 |
| Nitratireductor   | 1              | 19             | 0        | 0       | 0        | 0        | 0       | 0       | 0       | 1       | 0        | 0       | 0       | 0        | 0       | 0       | 0       | 0       | 0       | 0        | 0       | 0       | 0 |
| Nitratiruptor     | 2              | 40             | 0        | 0       | 0        | 0        | 0       | 0       | 0       | 0       | 0        | 0       | 0       | 0        | 0       | 0       | 0       | 0       | 0       | 0        | 0       | 0       | 0 |
| Nitrobacter       | 2              | 99             | 0        | 0       | 0        | 0        | 0       | 0       | 0       | 0       | 1        | 0       | 0       | 0        | 0       | 1       | 0       | 0       | 0       | 0        | 0       | 1       | 0 |
| Nitrococcus       | 1              | 2              | 0        | 0       | 0        | 0        | 0       | 0       | 0       | 0       | 0        | 0       | 0       | 0        | 0       | 0       | 0       | 0       | 0       | 0        | 0       | 0       | 0 |
| Nitrosococcus     | 2              | 94             | 0        | 0       | 0        | 0        | 0       | 1       | 0       | 1       | 0        | 0       | 0       | 0        | 0       | 1       | 0       | 0       | 0       | 0        | 0       | 1       | 0 |
| Nitrosomonas      | 2              | 72             | 0        | 0       | 0        | 0        | 0       | 0       | 0       | 0       | 0        | 0       | 0       | 0        | 0       | 1       | 0       | 0       | 0       | 0        | 0       | 0       | 0 |
| Nitrosopumilaceae | 1              | 7              | 0        | 0       | 0        | 0        | 0       | 0       | 0       | 0       | 0        | 0       | 0       | 0        | 0       | 0       | 0       | 0       | 0       | 0        | 0       | 0       | 0 |
| Nitrosopumilus    | 1              | 11             | 0        | 0       | 0        | 0        | 0       | 0       | 0       | 0       | 0        | 0       | 0       | 0        | 0       | 0       | 0       | 0       | 0       | 0        | 0       | 0       | 0 |
| Nitrospira        | 2              | 74             | 0        | 0       | 0        | 0        | 0       | 1       | 0       | 1       | 1        | 0       | 0       | 0        | 0       | 1       | 0       | 0       | 0       | 0        | 0       | 0       | 0 |
| Nocardia          | 2              | 185            | 1        | 0       | 0        | 0        | 1       | 1       | 1       | 1       | 1        | 0       | 0       | 0        | 0       | 1       | 1       | 0       | 1       | 0        | 1       | 1       | 1 |
| Nocardioidaceae   | 1              | 2              | 0        | 0       | 0        | 0        | 0       | 0       | 0       | 0       | 0        | 0       | 0       | 0        | 0       | 0       | 0       | 0       | 0       | 0        | 0       | 0       | 0 |
| Nocardioides      | 2              | 157            | 1        | 0       | 0        | 0        | 1       | 1       | 1       | 0       | 1        | 0       | 0       | 1        | 1       | 1       | 1       | 0       | 0       | 1        | 1       | 1       | 1 |
| Nocardiopsis      | 2              | 102            | 1        | 0       | 0        | 0        | 1       | 0       | 1       | 0       | 1        | 0       | 0       | 0        | 1       | 1       | 1       | 0       | 0       | 0        | 0       | 1       | 0 |
| Nodularia         | 1              | 22             | 0        | 0       | 0        | 0        | 0       | 0       | 0       | 1       | 0        | 0       | 0       | 0        | 0       | 0       | 0       | 0       | 0       | 0        | 0       | 0       | 0 |
| Nonlabens         | 1              | 19             | 0        | 0       | 0        | 0        | 0       | 0       | 0       | 0       | 0        | 0       | 0       | 0        | 0       | 0       | 0       | 0       | 0       | 0        | 0       | 0       | 0 |
| Nostoc            | 2              | 111            | 0        | 0       | 0        | 0        | 1       | 0       | 1       | 1       | 1        | 0       | 0       | 0        | 0       | 1       | 0       | 0       | 0       | 0        | 0       | 1       | 0 |
| Nostocaceae       | 1              | 2              | 0        | 0       | 0        | 0        | 0       | 0       | 0       | 0       | 0        | 0       | 0       | 0        | 0       | 0       | 0       | 0       | 0       | 0        | 0       | 0       | 0 |
| Novosphingobium   | 2              | 169            | 1        | 0       | 0        | 0        | 1       | 0       | 1       | 1       | 1        | 0       | 0       | 0        | 0       | 1       | 1       | 0       | 0       | 0        | 0       | 0       | 1 |
| Oceanibaculum     | 1              | 3              | 0        | 0       | 0        | 0        | 0       | 0       | 0       | 1       | 0        | 0       | 0       | 0        | 0       | 0       | 0       | 0       | 0       | 0        | 0       | 0       | 0 |
| Oceanibulbus      | 1              | 12             | 0        | 0       | 0        | 0        | 0       | 0       | 0       | 1       | 0        | 0       | 0       | 0        | 0       | 0       | 0       | 0       | 0       | 0        | 0       | 0       | 0 |
| Oceanicola        | 1              | 9              | 0        | 0       | 0        | 0        | 0       | 0       | 0       | 1       | 0        | 0       | 0       | 0        | 0       | 0       | 0       | 0       | 0       | 0        | 0       | 0       | 0 |
| Oceanimonas       | 1              | 33             | 0        | 0       | 0        | 0        | 0       | 0       | 0       | 0       | 0        | 0       | 0       | 0        | 0       | 0       | 0       | 0       | 0       | 0        | 0       | 0       | 0 |
| Oceaniovalibus    | 1              | 2              | 0        | 0       | 0        | 0        | 0       | 0       | 0       | 0       | 0        | 0       | 0       | 0        | 0       | 0       | 0       | 0       | 0       | 0        | 0       | 0       | 0 |
| Oceanithermus     | 2              | 72             | 0        | 0       | 0        | 0        | 0       | 1       | 0       | 0       | 1        | 0       | 0       | 0        | 0       | 1       | 1       | 0       | 0       | 0        | 0       | 1       | 0 |
| Oceanobacillus    | 2              | 91             | 0        | 0       | 0        | 0        | 0       | 0       | 0       | 0       | 1        | 0       | 0       | 0        | 0       | 1       | 1       | 0       | 0       | 0        | 0       | 1       | 0 |
| Oceanospirillum   | 1              | 2              | 0        | 0       | 0        | 0        | 0       | 0       | 0       | 1       | 0        | 0       | 0       | 0        | 0       | 0       | 0       | 0       | 0       | 0        | 0       | 0       | 0 |
| Ochrobactrum      | 2              | 133            | 0        | 0       | 0        | 0        | 0       | 0       | 1       | 1       | 0        | 1       | 1       | 0        | 1       | 1       | 0       | 0       | 0       | 0        | 0       | 0       | 1 |
| Octadecabacter    | 1              | 29             | 0        | 0       | 0        | 0        | 0       | 0       | 0       | 1       | 0        | 0       | 0       | 0        | 0       | 0       | 0       | 0       | 0       | 0        | 0       | 0       | 0 |
| Oenococcus        | 2              | 41             | 0        | 0       | 0        | 0        | 0       | 0       | 0       | 0       | 0        | 0       | 0       | 0        | 0       | 1       | 1       | 0       | 0       | 0        | 0       | 0       | 0 |
| Oleomonas         | 1              | 2              | 0        | 0       | 0        | 0        | 0       | 0       | 0       | 0       | 0        | 0       | 0       | 0        | 0       | 0       | 0       | 0       | 0       | 0        | 0       | 0       | 0 |
| Oligotropha       | 3              | 87             | 0        | 0       | 0        | 0        | 1       | 0       | 0       | 0       | 1        | 1       | 0       | 0        | 0       | 1       | 0       | 0       | 0       | 0        | 0       | 1       | 0 |
| Olsenella         | 2              | 40             | 0        | 0       | 0        | 0        | 0       | 0       | 0       | 0       | 0        | 0       | 0       | 0        | 0       | 1       | 1       | 0       | 0       | 0        | 0       | 1       | 0 |
| Opitutus          | 2              | 67             | 0        | 0       | 1        | 0        | 1       | 0       | 0       | 1       | 1        | 0       | 0       | 0        | 0       | 1       | 1       | 0       | 0       | 0        | 0       | 0       | 0 |
| Orientia          | 1              | 21             | 0        | 0       | 0        | 0        | 0       | 0       | 0       | 0       | 0        | 0       | 0       | 0        | 0       | 1       | 0       | 0       | 0       | 0        | 0       | 0       | 0 |
| Ornithobacterium  | 1              | 11             | 0        | 0       | 0        | 0        | 0       | 0       | 0       | 0       | 0        | 0       | 0       | 0        | 0       | 0       | 0       | 0       | 0       | 0        | 0       | 0       | 0 |
| Oscillatoria      | 1              | 16             | 0        | 0       | 0        | 0        | 0       | 0       | 0       | 1       | 0        | 0       | 0       | 0        | 0       | 0       | 0       | 0       | 0       | 0        | 0       | 0       | 0 |
| Oscillatoriales   | 1              | 2              | 0        | 0       | 0        | 0        | 0       | 0       | 0       | 1       | 0        | 0       | 0       | 0        | 0       | 0       | 0       | 0       | 0       | 0        | 0       | 0       | 0 |
| Oscillibacter     | 1              | 20             | 0        | 0       | 0        | 0        | 0       | 0       | 0       | 0       | 0        | 0       | 0       | 0        | 0       | 0       | 0       | 0       | 0       | 0        | 0       | 0       | 0 |
| Owenweeksia       | 1              | 15             | 0        | 0       | 0        | 0        | 0       | 0       | 0       | 0       | 0        | 0       | 0       | 0        | 0       | 0       | 0       | 0       | 0       | 0        | 0       | 0       | 0 |
| Oxalobacteraceae  | 1              | 4              | 0        | 0       | 0        | 0        | 0       | 0       | 0       | 0       | 0        | 0       | 0       | 0        | 0       | 0       | 0       | 0       | 0       | 0        | 0       | 0       | 0 |
| Paenibacillus     | 2              | 152            | 0        | 0       | 0        | 0        | 1       | 1       | 1       | 1       | 1        | 1       | 0       | 1        | 1       | 1       | 1       | 0       | 0       | 0        | 0       | 0       | 1 |
| Paludibacter      | 2              | 67             | 0        | 0       | 0        | 0        | 0       | 0       | 0       | 0       | 0        | 0       | 0       | 0        | 0       | 1       | 1       | 0       | 0       | 0        | 0       | 0       | 0 |
| Pandoraea         | 1              | 18             | 0        | 0       | 0        | 0        | 0       | 0       | 1       | 1       | 0        | 0       | 0       | 0        | 0       | 0       | 0       | 0       | 0       | 0        | 0       | 0       | 0 |
| Pannonibacter     | 1              | 3              | 0        | 0       | 0        | 0        | 0       | 0       | 0       | 1       | 0        | 0       | 0       | 0        | 0       | 0       | 0       | 0       | 0       | 0        | 0       | 0       | 0 |



| Genus              | Cluster Number | Protein Counts | 3.1.3.41 | 3.1.8.1 | 3.2.1.31 | 3.3.2.10 | 3.3.2.9 | 3.5.1.- | 3.5.1.4 | 3.5.1.5 | 3.5.1.54 | 3.5.1.6 | 3.5.2.- | 3.5.2.15 | 3.5.2.2 | 3.5.4.- | 3.5.4.5 | 3.5.5.1 | 3.5.5.7 | 3.5.99.3 | 3.6.1.7 | 3.7.1.- |
|--------------------|----------------|----------------|----------|---------|----------|----------|---------|---------|---------|---------|----------|---------|---------|----------|---------|---------|---------|---------|---------|----------|---------|---------|
| Pantholops         | 1              | 23             | 0        | 0       | 0        | 0        | 0       | 0       | 0       | 0       | 0        | 0       | 0       | 0        | 0       | 0       | 0       | 0       | 0       | 0        | 0       | 0       |
| Pantoea            | 2              | 181            | 0        | 0       | 0        | 0        | 1       | 1       | 1       | 0       | 1        | 1       | 0       | 0        | 1       | 1       | 1       | 1       | 1       | 1        | 1       | 1       |
| Parabacteroides    | 2              | 64             | 0        | 0       | 0        | 0        | 0       | 0       | 0       | 0       | 0        | 0       | 0       | 0        | 0       | 1       | 1       | 0       | 0       | 0        | 0       | 0       |
| Parachlamydia      | 1              | 11             | 0        | 0       | 0        | 0        | 0       | 0       | 0       | 0       | 0        | 0       | 0       | 0        | 0       | 0       | 0       | 0       | 0       | 0        | 0       | 0       |
| Paracoccus         | 2              | 169            | 0        | 0       | 0        | 0        | 0       | 1       | 1       | 1       | 1        | 1       | 0       | 0        | 1       | 1       | 1       | 0       | 0       | 0        | 0       | 1       |
| Parvibaculum       | 3              | 117            | 0        | 0       | 0        | 0        | 1       | 1       | 0       | 0       | 1        | 0       | 0       | 0        | 0       | 1       | 0       | 0       | 0       | 0        | 0       | 0       |
| Parvularcula       | 2              | 72             | 0        | 0       | 0        | 0        | 0       | 1       | 0       | 0       | 1        | 0       | 0       | 0        | 0       | 1       | 0       | 0       | 0       | 0        | 0       | 0       |
| Pasteurella        | 2              | 85             | 0        | 0       | 0        | 0        | 0       | 1       | 0       | 1       | 0        | 0       | 0       | 0        | 0       | 1       | 1       | 0       | 0       | 0        | 1       | 0       |
| Pasteurellaceae    | 1              | 2              | 0        | 0       | 0        | 0        | 0       | 0       | 0       | 0       | 0        | 0       | 0       | 0        | 0       | 0       | 0       | 0       | 0       | 0        | 0       | 0       |
| Pectobacterium     | 1              | 44             | 0        | 0       | 0        | 0        | 0       | 0       | 0       | 0       | 0        | 0       | 0       | 0        | 0       | 0       | 0       | 0       | 0       | 0        | 0       | 0       |
| Pediococcus        | 1              | 43             | 0        | 0       | 0        | 0        | 0       | 0       | 0       | 0       | 0        | 0       | 0       | 0        | 0       | 1       | 0       | 0       | 0       | 0        | 0       | 0       |
| Pedobacter         | 2              | 88             | 0        | 0       | 0        | 0        | 0       | 0       | 0       | 0       | 0        | 0       | 0       | 0        | 0       | 1       | 0       | 0       | 0       | 0        | 1       | 1       |
| Pelagibaca         | 1              | 10             | 0        | 0       | 0        | 0        | 0       | 0       | 0       | 0       | 0        | 0       | 0       | 0        | 0       | 0       | 0       | 0       | 0       | 0        | 0       | 0       |
| Pelagibacterium    | 1              | 39             | 0        | 0       | 0        | 0        | 0       | 0       | 0       | 1       | 0        | 0       | 0       | 0        | 0       | 0       | 0       | 0       | 0       | 0        | 0       | 0       |
| Pelobacter         | 2              | 85             | 0        | 0       | 0        | 0        | 0       | 0       | 1       | 0       | 0        | 0       | 0       | 0        | 0       | 1       | 1       | 0       | 0       | 0        | 1       | 0       |
| Pelodictyon        | 2              | 62             | 0        | 0       | 0        | 0        | 0       | 0       | 0       | 0       | 0        | 0       | 0       | 0        | 0       | 1       | 0       | 0       | 0       | 0        | 1       | 0       |
| Pelosinus          | 1              | 1              | 0        | 0       | 0        | 0        | 0       | 0       | 0       | 0       | 0        | 0       | 0       | 0        | 0       | 0       | 0       | 0       | 0       | 0        | 0       | 0       |
| Pelotomaculum      | 2              | 60             | 0        | 0       | 0        | 0        | 0       | 0       | 0       | 0       | 1        | 0       | 0       | 0        | 0       | 1       | 1       | 0       | 0       | 0        | 1       | 0       |
| Peptostreptococcus | 1              | 1              | 0        | 0       | 0        | 0        | 0       | 0       | 0       | 0       | 0        | 0       | 0       | 0        | 0       | 0       | 0       | 0       | 0       | 0        | 0       | 0       |
| Persephonella      | 2              | 55             | 0        | 0       | 0        | 0        | 0       | 0       | 0       | 0       | 0        | 0       | 0       | 0        | 0       | 1       | 0       | 0       | 0       | 0        | 1       | 0       |
| Petrogona          | 2              | 72             | 0        | 0       | 0        | 0        | 0       | 0       | 1       | 0       | 0        | 0       | 0       | 0        | 1       | 0       | 1       | 0       | 0       | 0        | 1       | 0       |
| Phaeobacter        | 2              | 55             | 0        | 0       | 0        | 0        | 0       | 0       | 0       | 1       | 0        | 1       | 0       | 0        | 0       | 0       | 0       | 0       | 0       | 0        | 0       | 0       |
| Phenylobacterium   | 3              | 103            | 0        | 0       | 0        | 0        | 1       | 0       | 1       | 0       | 0        | 0       | 0       | 0        | 0       | 0       | 0       | 0       | 0       | 0        | 1       | 0       |
| Photobacterium     | 2              | 119            | 0        | 0       | 0        | 0        | 1       | 0       | 0       | 0       | 1        | 0       | 0       | 0        | 0       | 1       | 1       | 0       | 0       | 1        | 1       | 1       |
| Photorhabdus       | 2              | 149            | 0        | 0       | 0        | 0        | 0       | 0       | 0       | 1       | 1        | 0       | 0       | 0        | 0       | 1       | 1       | 0       | 1       | 0        | 1       | 1       |
| Phycisphaera       | 1              | 9              | 0        | 0       | 0        | 0        | 0       | 0       | 0       | 0       | 0        | 0       | 0       | 0        | 0       | 0       | 0       | 0       | 0       | 0        | 0       | 0       |
| Phyllobacterium    | 1              | 6              | 0        | 0       | 0        | 0        | 0       | 0       | 0       | 1       | 0        | 0       | 0       | 0        | 0       | 0       | 0       | 0       | 0       | 0        | 0       | 0       |
| Picrophilus        | 1              | 15             | 0        | 0       | 0        | 0        | 0       | 0       | 0       | 0       | 0        | 0       | 0       | 0        | 0       | 0       | 0       | 0       | 0       | 0        | 0       | 0       |
| Pirellula          | 2              | 85             | 0        | 0       | 0        | 0        | 1       | 1       | 1       | 0       | 0        | 0       | 0       | 0        | 0       | 1       | 1       | 1       | 0       | 0        | 0       | 0       |
| Planctomyces       | 2              | 93             | 0        | 0       | 0        | 0        | 0       | 1       | 1       | 0       | 0        | 0       | 0       | 0        | 0       | 1       | 0       | 0       | 0       | 0        | 0       | 0       |
| Plautia            | 1              | 17             | 0        | 0       | 0        | 0        | 0       | 0       | 0       | 0       | 0        | 0       | 0       | 0        | 0       | 0       | 0       | 0       | 0       | 0        | 0       | 0       |
| Plesiomonas        | 1              | 4              | 0        | 0       | 0        | 0        | 0       | 0       | 0       | 0       | 0        | 0       | 0       | 0        | 0       | 0       | 0       | 0       | 0       | 0        | 0       | 0       |
| Pleurocapsa        | 1              | 23             | 0        | 0       | 0        | 0        | 0       | 0       | 0       | 1       | 0        | 0       | 0       | 0        | 0       | 0       | 0       | 0       | 0       | 0        | 0       | 0       |
| Polaribacter       | 2              | 74             | 0        | 0       | 0        | 0        | 0       | 0       | 0       | 0       | 1        | 0       | 0       | 0        | 0       | 1       | 1       | 0       | 1       | 0        | 0       | 1       |
| Polaromonas        | 3              | 238            | 0        | 0       | 0        | 0        | 0       | 1       | 1       | 1       | 1        | 1       | 0       | 0        | 1       | 0       | 0       | 0       | 1       | 0        | 1       | 1       |
| Polymorphum        | 3              | 173            | 0        | 0       | 0        | 0        | 0       | 1       | 0       | 1       | 1        | 1       | 0       | 0        | 1       | 1       | 1       | 0       | 0       | 1        | 1       | 0       |
| Polynucleobacter   | 1              | 19             | 0        | 0       | 0        | 0        | 0       | 0       | 0       | 0       | 0        | 0       | 0       | 0        | 0       | 0       | 0       | 0       | 0       | 0        | 0       | 0       |
| Ponticaulis        | 1              | 1              | 0        | 0       | 0        | 0        | 0       | 0       | 0       | 0       | 0        | 0       | 0       | 0        | 0       | 0       | 0       | 0       | 0       | 0        | 0       | 0       |
| Porphyromonas      | 2              | 63             | 0        | 0       | 0        | 0        | 0       | 1       | 0       | 0       | 0        | 0       | 0       | 0        | 0       | 1       | 1       | 0       | 0       | 0        | 0       | 0       |
| Prevotella         | 1              | 65             | 0        | 0       | 1        | 0        | 0       | 1       | 0       | 0       | 0        | 0       | 0       | 0        | 0       | 1       | 1       | 0       | 0       | 0        | 0       | 0       |
| Prochlorococcus    | 2              | 68             | 0        | 0       | 0        | 0        | 0       | 0       | 0       | 1       | 0        | 0       | 0       | 0        | 0       | 1       | 0       | 0       | 1       | 0        | 0       | 0       |
| Propionibacterium  | 1              | 62             | 1        | 0       | 1        | 0        | 0       | 0       | 0       | 0       | 1        | 0       | 0       | 0        | 0       | 1       | 1       | 0       | 0       | 0        | 1       | 1       |
| Prosthecochloris   | 1              | 16             | 0        | 0       | 0        | 0        | 0       | 0       | 0       | 0       | 0        | 0       | 0       | 0        | 0       | 0       | 0       | 0       | 0       | 0        | 0       | 0       |
| Proteobacteria     | 1              | 19             | 0        | 0       | 0        | 0        | 0       | 0       | 0       | 0       | 0        | 0       | 0       | 0        | 0       | 0       | 0       | 0       | 0       | 0        | 0       | 0       |
| Proteus            | 2              | 113            | 0        | 0       | 0        | 0        | 0       | 0       | 0       | 1       | 1        | 0       | 0       | 0        | 0       | 1       | 1       | 1       | 0       | 0        | 1       | 0       |
| Providencia        | 1              | 38             | 0        | 0       | 0        | 0        | 0       | 0       | 0       | 1       | 0        | 0       | 0       | 0        | 0       | 0       | 0       | 0       | 0       | 0        | 0       | 0       |
| Pseudaminobacter   | 1              | 10             | 0        | 0       | 0        | 0        | 0       | 0       | 0       | 1       | 0        | 0       | 0       | 0        | 0       | 0       | 0       | 0       | 0       | 0        | 0       | 0       |
| Pseudanabaena      | 1              | 11             | 0        | 0       | 0        | 0        | 0       | 0       | 0       | 0       | 0        | 0       | 0       | 0        | 0       | 0       | 0       | 0       | 0       | 0        | 0       | 0       |
| Pseudoalteromonas  | 2              | 188            | 0        | 0       | 0        | 0        | 1       | 1       | 0       | 1       | 1        | 0       | 0       | 0        | 0       | 1       | 1       | 1       | 0       | 0        | 0       | 1       |
| Pseudochrobactrum  | 1              | 7              | 0        | 0       | 0        | 0        | 0       | 0       | 0       | 0       | 0        | 0       | 0       | 0        | 0       | 0       | 0       | 0       | 0       | 0        | 0       | 0       |
| Pseudogulbenkiania | 1              | 40             | 0        | 0       | 0        | 0        | 0       | 0       | 0       | 0       | 0        | 0       | 0       | 0        | 0       | 0       | 0       | 0       | 0       | 0        | 0       | 0       |
| pseudomallei       | 3              | 131            | 0        | 0       | 0        | 0        | 1       | 1       | 0       | 1       | 1        | 1       | 1       | 0        | 0       | 1       | 1       | 0       | 0       | 0        | 1       | 1       |

| Genus                   | Cluster Number | Protein Counts | 3.1.3.41 | 3.1.8.1 | 3.2.1.31 | 3.3.2.10 | 3.3.2.9 | 3.5.1.- | 3.5.1.4 | 3.5.1.5 | 3.5.1.54 | 3.5.1.6 | 3.5.2.- | 3.5.2.15 | 3.5.2.2 | 3.5.4.- | 3.5.4.5 | 3.5.5.1 | 3.5.5.7 | 3.5.99.3 | 3.6.1.7 | 3.7.1.- |
|-------------------------|----------------|----------------|----------|---------|----------|----------|---------|---------|---------|---------|----------|---------|---------|----------|---------|---------|---------|---------|---------|----------|---------|---------|
| Pseudomonas             | 3              | 381            | 0        | 0       | 0        | 0        | 1       | 1       | 1       | 1       | 1        | 1       | 0       | 0        | 1       | 1       | 0       | 1       | 1       | 1        | 1       | 1       |
| Pseudonocardia          | 3              | 180            | 1        | 0       | 0        | 0        | 1       | 1       | 1       | 1       | 1        | 0       | 0       | 0        | 1       | 1       | 0       | 0       | 1       | 0        | 1       | 0       |
| Pseudorhodobacter       | 1              | 4              | 0        | 0       | 0        | 0        | 0       | 0       | 0       | 0       | 0        | 0       | 0       | 0        | 0       | 0       | 0       | 0       | 0       | 0        | 0       | 0       |
| Pseudovibrio            | 1              | 33             | 0        | 0       | 0        | 0        | 0       | 0       | 0       | 0       | 0        | 0       | 0       | 0        | 0       | 0       | 0       | 0       | 0       | 0        | 0       | 0       |
| Pseudoxanthomonas       | 2              | 124            | 0        | 0       | 0        | 0        | 0       | 1       | 0       | 0       | 0        | 0       | 0       | 0        | 0       | 1       | 0       | 0       | 0       | 0        | 1       | 1       |
| Psychrobacter           | 2              | 124            | 0        | 0       | 0        | 0        | 0       | 0       | 0       | 1       | 1        | 0       | 0       | 0        | 0       | 1       | 0       | 0       | 0       | 1        | 0       | 0       |
| Psychroflexus           | 1              | 22             | 0        | 0       | 0        | 0        | 0       | 0       | 0       | 0       | 0        | 0       | 0       | 0        | 0       | 0       | 0       | 0       | 0       | 0        | 0       | 0       |
| Psychromonas            | 2              | 110            | 0        | 0       | 0        | 0        | 0       | 0       | 0       | 1       | 1        | 0       | 0       | 0        | 0       | 1       | 1       | 0       | 0       | 0        | 1       | 0       |
| Pusillimonas            | 3              | 111            | 0        | 0       | 0        | 0        | 0       | 0       | 1       | 0       | 1        | 0       | 0       | 0        | 1       | 1       | 0       | 0       | 0       | 0        | 0       | 0       |
| Pyrobaculum             | 1              | 15             | 0        | 0       | 0        | 0        | 0       | 0       | 0       | 0       | 0        | 0       | 0       | 0        | 0       | 0       | 0       | 0       | 0       | 0        | 0       | 0       |
| Pyrococcus              | 1              | 10             | 0        | 0       | 0        | 0        | 0       | 0       | 0       | 0       | 0        | 0       | 0       | 0        | 0       | 0       | 0       | 0       | 0       | 0        | 0       | 0       |
| Pyrolobus               | 1              | 4              | 0        | 0       | 0        | 0        | 0       | 0       | 0       | 0       | 0        | 0       | 0       | 0        | 0       | 0       | 0       | 0       | 0       | 0        | 0       | 0       |
| Rahnella                | 2              | 143            | 0        | 0       | 0        | 0        | 0       | 1       | 0       | 0       | 1        | 0       | 0       | 0        | 0       | 1       | 1       | 1       | 0       | 1        | 1       | 0       |
| Ralstonia               | 3              | 332            | 0        | 0       | 0        | 0        | 1       | 1       | 0       | 1       | 1        | 1       | 0       | 0        | 1       | 1       | 0       | 1       | 1       | 1        | 1       | 1       |
| Ramlibacter             | 1              | 35             | 0        | 0       | 0        | 0        | 0       | 0       | 0       | 1       | 0        | 0       | 0       | 0        | 0       | 0       | 0       | 0       | 0       | 0        | 0       | 0       |
| Raoultella              | 2              | 139            | 0        | 0       | 0        | 0        | 0       | 0       | 0       | 1       | 0        | 0       | 0       | 0        | 0       | 0       | 0       | 0       | 0       | 0        | 0       | 1       |
| Raphidiopsis            | 1              | 5              | 0        | 0       | 0        | 0        | 0       | 0       | 0       | 0       | 0        | 0       | 0       | 0        | 0       | 0       | 0       | 0       | 0       | 0        | 0       | 0       |
| Reinekea                | 1              | 2              | 0        | 0       | 0        | 0        | 0       | 0       | 0       | 1       | 0        | 0       | 0       | 0        | 0       | 0       | 0       | 0       | 0       | 0        | 0       | 0       |
| Renibacterium           | 2              | 67             | 1        | 0       | 0        | 0        | 1       | 0       | 0       | 0       | 1        | 0       | 0       | 0        | 0       | 1       | 0       | 0       | 0       | 0        | 0       | 1       |
| Rhizobiaceae            | 1              | 3              | 0        | 0       | 0        | 0        | 0       | 0       | 0       | 0       | 0        | 0       | 0       | 0        | 0       | 0       | 0       | 0       | 0       | 0        | 0       | 1       |
| Rhizobiales             | 1              | 6              | 0        | 0       | 0        | 0        | 0       | 0       | 0       | 1       | 0        | 0       | 0       | 0        | 0       | 0       | 0       | 0       | 0       | 0        | 0       | 0       |
| Rhizobium               | 3              | 257            | 0        | 0       | 1        | 0        | 1       | 1       | 1       | 1       | 1        | 1       | 0       | 1        | 1       | 1       | 1       | 0       | 1       | 1        | 1       | 1       |
| Rhizobium/Agrobacterium | 2              | 87             | 0        | 0       | 0        | 0        | 1       | 0       | 0       | 1       | 0        | 0       | 0       | 0        | 0       | 1       | 0       | 0       | 0       | 0        | 0       | 1       |
| Rhodanobacter           | 1              | 21             | 0        | 0       | 0        | 0        | 0       | 0       | 0       | 0       | 0        | 0       | 0       | 0        | 0       | 0       | 0       | 0       | 0       | 0        | 0       | 0       |
| Rhodobacter             | 3              | 175            | 0        | 0       | 0        | 0        | 0       | 1       | 1       | 1       | 1        | 1       | 0       | 0        | 1       | 1       | 1       | 0       | 0       | 0        | 0       | 1       |
| Rhodobacteraceae        | 1              | 21             | 0        | 0       | 0        | 0        | 0       | 0       | 0       | 0       | 0        | 0       | 0       | 0        | 1       | 0       | 0       | 0       | 0       | 0        | 0       | 0       |
| Rhodobacterales         | 1              | 34             | 0        | 0       | 0        | 0        | 0       | 0       | 0       | 1       | 0        | 0       | 0       | 0        | 0       | 0       | 0       | 0       | 0       | 0        | 0       | 0       |
| Rhodococcus             | 2              | 292            | 1        | 0       | 0        | 0        | 1       | 1       | 1       | 1       | 1        | 0       | 0       | 0        | 0       | 1       | 1       | 0       | 0       | 0        | 1       | 1       |
| Rhodocyclaceae          | 1              | 7              | 0        | 0       | 0        | 0        | 0       | 0       | 0       | 1       | 0        | 0       | 0       | 0        | 0       | 0       | 0       | 0       | 0       | 0        | 0       | 0       |
| Rhodoferax              | 3              | 144            | 0        | 0       | 0        | 0        | 0       | 1       | 0       | 1       | 1        | 1       | 0       | 0        | 0       | 0       | 0       | 0       | 0       | 0        | 1       | 0       |
| Rhodomicrobium          | 2              | 103            | 0        | 0       | 0        | 0        | 0       | 1       | 0       | 0       | 1        | 0       | 0       | 0        | 0       | 1       | 0       | 0       | 0       | 0        | 0       | 0       |
| Rhodopirellula          | 2              | 87             | 0        | 0       | 0        | 0        | 0       | 0       | 1       | 0       | 0        | 0       | 0       | 0        | 0       | 1       | 1       | 0       | 0       | 0        | 0       | 0       |
| Rhodopseudomonas        | 3              | 246            | 0        | 0       | 0        | 0        | 1       | 1       | 1       | 1       | 1        | 1       | 1       | 0        | 0       | 1       | 1       | 1       | 0       | 0        | 1       | 1       |
| Rhodospirillum          | 2              | 121            | 0        | 0       | 0        | 0        | 1       | 0       | 1       | 0       | 1        | 0       | 1       | 0        | 0       | 1       | 1       | 0       | 0       | 0        | 1       | 0       |
| Rhodothermus            | 2              | 76             | 0        | 0       | 0        | 0        | 0       | 0       | 1       | 0       | 0        | 0       | 0       | 0        | 0       | 1       | 0       | 0       | 0       | 0        | 1       | 1       |
| Rhodovulum              | 1              | 4              | 0        | 0       | 0        | 0        | 0       | 0       | 0       | 1       | 0        | 0       | 0       | 0        | 0       | 0       | 0       | 0       | 0       | 0        | 0       | 0       |
| Richelia                | 1              | 2              | 0        | 0       | 0        | 0        | 0       | 0       | 0       | 0       | 0        | 0       | 0       | 0        | 0       | 0       | 0       | 0       | 0       | 0        | 0       | 0       |
| Rickettsia              | 2              | 43             | 0        | 0       | 0        | 0        | 0       | 0       | 0       | 0       | 0        | 0       | 0       | 0        | 0       | 1       | 0       | 0       | 0       | 0        | 0       | 0       |
| Rickettsiaceae          | 1              | 5              | 0        | 0       | 0        | 0        | 0       | 0       | 0       | 0       | 0        | 0       | 0       | 0        | 0       | 1       | 0       | 0       | 0       | 0        | 0       | 0       |
| Riemerella              | 2              | 61             | 0        | 0       | 0        | 0        | 0       | 0       | 0       | 1       | 0        | 0       | 0       | 0        | 0       | 1       | 1       | 0       | 0       | 0        | 0       | 1       |
| Rivularia               | 1              | 18             | 0        | 0       | 0        | 0        | 0       | 0       | 0       | 0       | 0        | 0       | 0       | 0        | 0       | 0       | 0       | 0       | 0       | 0        | 0       | 0       |
| Robiginitalea           | 2              | 83             | 0        | 0       | 0        | 0        | 0       | 0       | 0       | 0       | 1        | 0       | 0       | 0        | 0       | 1       | 1       | 0       | 0       | 0        | 0       | 1       |
| Roseburia               | 2              | 58             | 0        | 0       | 1        | 0        | 0       | 1       | 0       | 0       | 1        | 0       | 0       | 0        | 0       | 1       | 1       | 0       | 0       | 0        | 1       | 0       |
| Roseibium               | 1              | 3              | 0        | 0       | 0        | 0        | 0       | 0       | 0       | 0       | 0        | 0       | 0       | 0        | 0       | 0       | 0       | 0       | 0       | 0        | 0       | 0       |
| Roseiflexus             | 3              | 100            | 0        | 0       | 0        | 0        | 0       | 1       | 0       | 0       | 0        | 0       | 0       | 0        | 0       | 0       | 1       | 0       | 0       | 0        | 1       | 0       |
| Roseobacter             | 2              | 149            | 0        | 0       | 0        | 0        | 0       | 0       | 1       | 1       | 1        | 1       | 0       | 0        | 1       | 1       | 1       | 0       | 0       | 0        | 0       | 1       |
| Roseomonas              | 1              | 2              | 0        | 0       | 0        | 0        | 0       | 0       | 0       | 1       | 0        | 0       | 0       | 0        | 0       | 0       | 0       | 0       | 0       | 0        | 0       | 0       |
| Roseovarius             | 1              | 15             | 0        | 0       | 0        | 0        | 0       | 0       | 0       | 1       | 0        | 0       | 0       | 0        | 0       | 0       | 0       | 0       | 0       | 0        | 0       | 0       |
| Rothia                  | 1              | 44             | 1        | 0       | 0        | 0        | 1       | 0       | 0       | 0       | 0        | 0       | 0       | 0        | 0       | 1       | 0       | 0       | 0       | 0        | 1       | 0       |
| Rubrivivax              | 1              | 24             | 0        | 0       | 0        | 0        | 0       | 0       | 0       | 0       | 0        | 0       | 0       | 0        | 0       | 0       | 0       | 0       | 0       | 0        | 0       | 0       |
| Rubroacter              | 3              | 117            | 0        | 0       | 0        | 0        | 0       | 1       | 1       | 0       | 0        | 1       | 0       | 0        | 1       | 1       | 1       | 0       | 0       | 0        | 1       | 1       |
| Ruegeria                | 2              | 189            | 0        | 0       | 0        | 0        | 1       | 1       | 1       | 1       | 1        | 1       | 0       | 0        | 1       | 1       | 1       | 1       | 0       | 0        | 0       | 1       |

| Genus             | Cluster Number | Protein Counts | 3.1.3.41 | 3.1.8.1 | 3.2.1.31 | 3.3.2.10 | 3.3.2.9 | 3.5.1.- | 3.5.1.4 | 3.5.1.5 | 3.5.1.54 | 3.5.1.6 | 3.5.2.- | 3.5.2.15 | 3.5.2.2 | 3.5.4.- | 3.5.4.5 | 3.5.5.1 | 3.5.5.7 | 3.5.99.3 | 3.6.1.7 | 3.7.1.- |   |
|-------------------|----------------|----------------|----------|---------|----------|----------|---------|---------|---------|---------|----------|---------|---------|----------|---------|---------|---------|---------|---------|----------|---------|---------|---|
| Ruminococcaceae   | 1              | 2              | 0        | 0       | 0        | 0        | 0       | 0       | 0       | 0       | 0        | 0       | 0       | 0        | 0       | 0       | 0       | 0       | 0       | 0        | 0       | 0       |   |
| Ruminococcus      | 2              | 101            | 0        | 0       | 0        | 0        | 0       | 1       | 0       | 1       | 0        | 1       | 0       | 0        | 1       | 1       | 1       | 0       | 0       | 0        | 0       | 1       | 1 |
| Runella           | 1              | 26             | 0        | 0       | 0        | 0        | 0       | 0       | 0       | 0       | 0        | 0       | 0       | 0        | 0       | 0       | 0       | 0       | 0       | 0        | 0       | 0       | 0 |
| Saccharomonospora | 2              | 132            | 1        | 0       | 0        | 0        | 1       | 1       | 1       | 0       | 1        | 0       | 0       | 0        | 0       | 1       | 1       | 0       | 1       | 0        | 1       | 1       | 1 |
| Saccharophagus    | 2              | 81             | 0        | 0       | 0        | 0        | 0       | 0       | 0       | 1       | 1        | 0       | 0       | 0        | 0       | 1       | 0       | 0       | 0       | 0        | 0       | 1       | 0 |
| Saccharopolyspora | 3              | 194            | 1        | 0       | 0        | 0        | 1       | 1       | 1       | 1       | 1        | 0       | 0       | 0        | 1       | 1       | 1       | 0       | 0       | 0        | 0       | 1       | 1 |
| Saccharothrix     | 1              | 32             | 0        | 0       | 0        | 0        | 0       | 0       | 0       | 0       | 0        | 0       | 0       | 0        | 0       | 0       | 0       | 0       | 0       | 0        | 0       | 0       | 0 |
| Sagittula         | 1              | 10             | 0        | 0       | 0        | 0        | 0       | 0       | 0       | 1       | 0        | 0       | 0       | 0        | 0       | 0       | 0       | 0       | 0       | 0        | 0       | 0       | 0 |
| Salinibacter      | 2              | 77             | 0        | 0       | 0        | 0        | 0       | 0       | 1       | 0       | 0        | 0       | 0       | 0        | 0       | 1       | 1       | 0       | 0       | 0        | 0       | 1       | 1 |
| Salinimonas       | 1              | 1              | 0        | 0       | 0        | 0        | 0       | 0       | 0       | 0       | 0        | 0       | 0       | 0        | 0       | 0       | 0       | 0       | 0       | 0        | 0       | 0       | 0 |
| Salinispora       | 3              | 127            | 1        | 0       | 0        | 1        | 1       | 1       | 1       | 0       | 1        | 0       | 0       | 0        | 0       | 1       | 1       | 0       | 0       | 0        | 0       | 0       | 1 |
| Salinivibrio      | 1              | 2              | 0        | 0       | 0        | 0        | 0       | 0       | 0       | 0       | 0        | 0       | 0       | 0        | 0       | 0       | 0       | 0       | 0       | 0        | 0       | 0       | 0 |
| Salmonella        | 2              | 151            | 0        | 0       | 1        | 0        | 0       | 0       | 0       | 0       | 1        | 0       | 0       | 0        | 0       | 1       | 1       | 0       | 0       | 0        | 0       | 1       | 1 |
| Sanguibacter      | 2              | 73             | 1        | 0       | 0        | 0        | 1       | 0       | 1       | 0       | 1        | 0       | 0       | 0        | 1       | 1       | 1       | 0       | 0       | 0        | 0       | 0       | 0 |
| Saprospira        | 1              | 13             | 0        | 0       | 0        | 0        | 0       | 0       | 0       | 0       | 0        | 0       | 0       | 0        | 0       | 0       | 0       | 0       | 0       | 0        | 0       | 0       | 0 |
| Scardovia         | 1              | 1              | 0        | 0       | 0        | 0        | 0       | 0       | 0       | 0       | 0        | 0       | 0       | 0        | 0       | 0       | 0       | 0       | 0       | 0        | 0       | 0       | 0 |
| Scytonema         | 1              | 10             | 0        | 0       | 0        | 0        | 0       | 0       | 0       | 1       | 0        | 0       | 0       | 0        | 0       | 0       | 0       | 0       | 0       | 0        | 0       | 0       | 0 |
| Sebaldella        | 2              | 69             | 0        | 0       | 0        | 0        | 0       | 1       | 0       | 0       | 0        | 0       | 0       | 0        | 1       | 0       | 1       | 0       | 0       | 0        | 0       | 0       | 1 |
| Segniliparus      | 2              | 85             | 1        | 0       | 0        | 0        | 1       | 1       | 0       | 1       | 1        | 1       | 0       | 0        | 1       | 1       | 1       | 0       | 0       | 0        | 0       | 0       | 0 |
| Selenomonas       | 2              | 57             | 0        | 0       | 0        | 0        | 0       | 1       | 0       | 0       | 0        | 0       | 0       | 0        | 0       | 1       | 1       | 0       | 0       | 0        | 0       | 1       | 0 |
| Serinicoccus      | 1              | 1              | 0        | 0       | 0        | 0        | 0       | 0       | 0       | 0       | 0        | 0       | 0       | 0        | 0       | 0       | 0       | 0       | 0       | 0        | 0       | 0       | 0 |
| Serratia          | 2              | 186            | 0        | 0       | 1        | 0        | 1       | 0       | 0       | 0       | 1        | 1       | 1       | 0        | 0       | 1       | 1       | 1       | 0       | 0        | 0       | 1       | 1 |
| Shewanella        | 3              | 214            | 0        | 0       | 0        | 0        | 1       | 1       | 1       | 1       | 1        | 0       | 0       | 0        | 0       | 1       | 1       | 1       | 1       | 0        | 1       | 1       | 1 |
| Shigella          | 2              | 172            | 0        | 0       | 1        | 0        | 0       | 0       | 0       | 1       | 1        | 0       | 0       | 0        | 0       | 1       | 1       | 0       | 0       | 0        | 0       | 1       | 1 |
| Shinella          | 1              | 2              | 0        | 0       | 0        | 0        | 0       | 0       | 0       | 0       | 0        | 0       | 0       | 0        | 0       | 0       | 0       | 0       | 0       | 0        | 0       | 0       | 0 |
| Sideroxydans      | 2              | 81             | 0        | 0       | 0        | 0        | 0       | 1       | 0       | 0       | 1        | 0       | 0       | 0        | 0       | 1       | 0       | 0       | 0       | 0        | 0       | 1       | 0 |
| Silicibacter      | 2              | 105            | 0        | 0       | 0        | 0        | 0       | 0       | 1       | 1       | 1        | 1       | 0       | 0        | 1       | 0       | 1       | 0       | 0       | 0        | 0       | 0       | 0 |
| Simiduia          | 1              | 18             | 0        | 0       | 0        | 0        | 0       | 0       | 0       | 0       | 0        | 0       | 0       | 0        | 0       | 0       | 0       | 0       | 0       | 0        | 0       | 0       | 0 |
| Simkania          | 1              | 6              | 0        | 0       | 0        | 0        | 0       | 0       | 0       | 0       | 0        | 0       | 0       | 0        | 0       | 0       | 0       | 0       | 0       | 0        | 0       | 0       | 0 |
| Simonsiella       | 1              | 2              | 0        | 0       | 0        | 0        | 0       | 0       | 0       | 0       | 0        | 0       | 0       | 0        | 0       | 0       | 0       | 0       | 0       | 0        | 0       | 0       | 0 |
| Singulisphaera    | 1              | 18             | 0        | 0       | 0        | 0        | 0       | 0       | 0       | 0       | 0        | 0       | 0       | 0        | 0       | 0       | 0       | 0       | 0       | 0        | 0       | 0       | 0 |
| Sinorhizobium     | 3              | 207            | 0        | 0       | 0        | 0        | 1       | 1       | 1       | 1       | 1        | 1       | 0       | 0        | 1       | 1       | 1       | 0       | 0       | 0        | 0       | 1       | 1 |
| Slackia           | 2              | 46             | 0        | 0       | 0        | 0        | 0       | 1       | 1       | 0       | 0        | 0       | 0       | 0        | 0       | 1       | 0       | 0       | 0       | 0        | 0       | 0       | 0 |
| Smaragdicoccus    | 1              | 3              | 0        | 0       | 0        | 0        | 0       | 0       | 0       | 0       | 0        | 0       | 0       | 0        | 0       | 0       | 0       | 0       | 0       | 0        | 0       | 0       | 0 |
| Sodalis           | 2              | 71             | 0        | 0       | 0        | 0        | 0       | 0       | 1       | 0       | 1        | 0       | 0       | 0        | 0       | 1       | 1       | 0       | 0       | 0        | 0       | 1       | 0 |
| Solibacillus      | 1              | 23             | 0        | 0       | 0        | 0        | 0       | 0       | 0       | 0       | 0        | 0       | 0       | 0        | 0       | 0       | 0       | 0       | 0       | 0        | 0       | 0       | 0 |
| Solitaea          | 1              | 13             | 0        | 0       | 0        | 0        | 0       | 0       | 0       | 0       | 0        | 0       | 0       | 0        | 0       | 0       | 0       | 0       | 0       | 0        | 0       | 0       | 0 |
| Sorangium         | 3              | 115            | 0        | 0       | 0        | 0        | 1       | 0       | 1       | 1       | 1        | 0       | 0       | 0        | 1       | 1       | 1       | 0       | 1       | 0        | 1       | 0       | 0 |
| Sphaerobacter     | 2              | 100            | 0        | 0       | 0        | 0        | 0       | 1       | 1       | 0       | 1        | 1       | 0       | 0        | 1       | 1       | 0       | 1       | 0       | 0        | 0       | 1       | 0 |
| Sphaerochaeta     | 1              | 42             | 0        | 0       | 0        | 0        | 0       | 0       | 0       | 0       | 0        | 0       | 0       | 0        | 0       | 0       | 1       | 0       | 0       | 0        | 0       | 0       | 1 |
| Sphingobacterium  | 3              | 85             | 0        | 0       | 0        | 0        | 0       | 0       | 0       | 0       | 1        | 0       | 0       | 0        | 0       | 1       | 0       | 0       | 0       | 0        | 0       | 1       | 1 |
| Sphingobium       | 1              | 179            | 0        | 0       | 0        | 0        | 0       | 0       | 0       | 1       | 1        | 0       | 0       | 0        | 0       | 1       | 1       | 0       | 0       | 0        | 0       | 1       | 0 |
| Sphingomonadaceae | 1              | 15             | 0        | 0       | 0        | 0        | 0       | 0       | 0       | 0       | 0        | 0       | 0       | 0        | 0       | 0       | 0       | 0       | 0       | 0        | 0       | 0       | 0 |
| Sphingomonas      | 2              | 220            | 0        | 0       | 0        | 0        | 1       | 1       | 1       | 0       | 0        | 0       | 0       | 0        | 0       | 1       | 1       | 0       | 1       | 0        | 1       | 1       | 1 |
| Sphingopyxis      | 3              | 99             | 0        | 0       | 0        | 0        | 1       | 0       | 0       | 0       | 0        | 0       | 0       | 0        | 0       | 1       | 1       | 0       | 1       | 0        | 0       | 1       | 1 |
| Spirochaeta       | 2              | 103            | 0        | 0       | 0        | 0        | 0       | 1       | 0       | 0       | 0        | 0       | 0       | 0        | 1       | 0       | 1       | 0       | 0       | 1        | 1       | 1       | 1 |
| Spiroplasma       | 1              | 6              | 0        | 0       | 0        | 0        | 0       | 0       | 0       | 0       | 0        | 0       | 0       | 0        | 0       | 0       | 0       | 0       | 0       | 0        | 0       | 0       | 0 |
| Spirosoma         | 2              | 107            | 0        | 0       | 0        | 0        | 1       | 1       | 1       | 0       | 0        | 0       | 0       | 0        | 0       | 1       | 0       | 1       | 0       | 0        | 0       | 0       | 1 |
| Stackebrandtia    | 2              | 110            | 1        | 0       | 0        | 0        | 1       | 1       | 1       | 0       | 1        | 0       | 0       | 0        | 0       | 1       | 1       | 0       | 0       | 0        | 0       | 1       | 1 |
| Stanieria         | 1              | 17             | 0        | 0       | 0        | 0        | 0       | 0       | 0       | 0       | 0        | 0       | 0       | 0        | 0       | 0       | 0       | 0       | 0       | 0        | 0       | 0       | 0 |
| Staphylococcus    | 2              | 108            | 0        | 0       | 1        | 0        | 0       | 0       | 1       | 1       | 1        | 1       | 0       | 0        | 0       | 1       | 1       | 0       | 0       | 0        | 0       | 1       | 0 |
| Staphylothermus   | 1              | 12             | 0        | 0       | 0        | 0        | 0       | 0       | 0       | 0       | 0        | 0       | 0       | 0        | 0       | 0       | 0       | 0       | 0       | 0        | 0       | 0       | 0 |

| Genus                  | Cluster Number | Protein Counts | 3.1.3.41 | 3.1.8.1 | 3.2.1.31 | 3.3.2.10 | 3.3.2.9 | 3.5.1.- | 3.5.1.4 | 3.5.1.5 | 3.5.1.54 | 3.5.1.6 | 3.5.2.- | 3.5.2.15 | 3.5.2.2 | 3.5.4.- | 3.5.4.5 | 3.5.5.1 | 3.5.5.7 | 3.5.99.3 | 3.6.1.7 | 3.7.1.- |
|------------------------|----------------|----------------|----------|---------|----------|----------|---------|---------|---------|---------|----------|---------|---------|----------|---------|---------|---------|---------|---------|----------|---------|---------|
| Stappia                | 1              | 2              | 0        | 0       | 0        | 0        | 0       | 0       | 0       | 1       | 0        | 0       | 0       | 0        | 0       | 0       | 0       | 0       | 0       | 0        | 0       | 0       |
| Starkeya               | 3              | 134            | 0        | 0       | 0        | 0        | 1       | 1       | 1       | 1       | 1        | 1       | 0       | 0        | 1       | 1       | 0       | 0       | 1       | 1        | 1       | 1       |
| Stenotrophomonas       | 3              | 104            | 0        | 0       | 0        | 0        | 1       | 0       | 0       | 0       | 0        | 0       | 0       | 0        | 0       | 1       | 0       | 0       | 0       | 0        | 0       | 0       |
| Stigmatella            | 3              | 129            | 0        | 0       | 0        | 0        | 1       | 1       | 0       | 1       | 0        | 0       | 0       | 0        | 1       | 1       | 1       | 0       | 0       | 0        | 0       | 1       |
| Streptobacillus        | 1              | 38             | 0        | 0       | 1        | 0        | 0       | 0       | 0       | 0       | 0        | 0       | 0       | 0        | 0       | 0       | 1       | 0       | 0       | 0        | 0       | 0       |
| Streptococcus          | 2              | 121            | 0        | 0       | 1        | 0        | 0       | 1       | 1       | 1       | 0        | 0       | 0       | 0        | 0       | 1       | 1       | 0       | 0       | 0        | 0       | 1       |
| Streptomyces           | 2              | 253            | 1        | 0       | 0        | 0        | 1       | 1       | 1       | 1       | 1        | 1       | 0       | 0        | 1       | 1       | 1       | 1       | 0       | 0        | 0       | 1       |
| Streptosporangium      | 3              | 148            | 1        | 0       | 0        | 0        | 1       | 1       | 1       | 1       | 1        | 0       | 0       | 0        | 0       | 1       | 1       | 0       | 0       | 0        | 0       | 1       |
| Strigomonas            | 1              | 2              | 0        | 0       | 0        | 0        | 0       | 0       | 0       | 0       | 0        | 0       | 0       | 0        | 0       | 0       | 0       | 0       | 0       | 0        | 0       | 0       |
| Sulfitobacter          | 1              | 10             | 0        | 0       | 0        | 0        | 0       | 0       | 0       | 1       | 0        | 0       | 0       | 0        | 0       | 0       | 0       | 0       | 0       | 0        | 0       | 0       |
| Sulfobacillus          | 1              | 30             | 0        | 0       | 0        | 0        | 0       | 0       | 0       | 0       | 0        | 0       | 0       | 0        | 0       | 0       | 0       | 0       | 0       | 0        | 0       | 0       |
| Sulfolobus             | 1              | 23             | 0        | 0       | 0        | 0        | 0       | 0       | 0       | 0       | 0        | 0       | 0       | 0        | 0       | 0       | 0       | 0       | 0       | 0        | 0       | 0       |
| Sulfuricurvum          | 2              | 67             | 0        | 0       | 0        | 0        | 0       | 1       | 1       | 0       | 1        | 0       | 0       | 0        | 0       | 1       | 0       | 0       | 0       | 0        | 0       | 0       |
| Sulfurihydrogenibium   | 2              | 55             | 0        | 0       | 0        | 0        | 0       | 0       | 0       | 0       | 0        | 0       | 0       | 0        | 0       | 1       | 0       | 0       | 0       | 0        | 0       | 1       |
| Sulfurimonas           | 2              | 60             | 0        | 0       | 0        | 0        | 0       | 1       | 1       | 0       | 0        | 0       | 0       | 0        | 0       | 1       | 0       | 0       | 0       | 0        | 0       | 0       |
| Sulfurospirillum       | 1              | 48             | 0        | 0       | 0        | 0        | 0       | 1       | 0       | 0       | 1        | 0       | 0       | 0        | 0       | 0       | 0       | 0       | 0       | 0        | 0       | 1       |
| Sulfurovum             | 2              | 48             | 0        | 0       | 0        | 0        | 0       | 0       | 1       | 0       | 0        | 0       | 0       | 0        | 0       | 0       | 0       | 0       | 0       | 0        | 0       | 1       |
| Symbiobacterium        | 2              | 68             | 0        | 0       | 0        | 0        | 0       | 1       | 0       | 0       | 1        | 0       | 0       | 0        | 0       | 1       | 1       | 0       | 0       | 0        | 0       | 0       |
| Synechococcus          | 1              | 34             | 0        | 0       | 0        | 0        | 0       | 0       | 0       | 0       | 0        | 0       | 0       | 0        | 0       | 0       | 0       | 0       | 0       | 0        | 0       | 0       |
| Synechocystis          | 1              | 40             | 0        | 0       | 0        | 0        | 0       | 0       | 0       | 0       | 0        | 0       | 0       | 0        | 0       | 0       | 0       | 0       | 0       | 0        | 0       | 0       |
| Synergistetes          | 1              | 27             | 0        | 0       | 0        | 0        | 0       | 1       | 1       | 0       | 1        | 0       | 0       | 0        | 0       | 0       | 0       | 0       | 0       | 0        | 0       | 0       |
| Syntrophobacter        | 2              | 101            | 0        | 0       | 0        | 0        | 0       | 0       | 1       | 0       | 1        | 0       | 0       | 0        | 0       | 1       | 0       | 1       | 0       | 0        | 0       | 1       |
| Syntrophobotulus       | 2              | 71             | 0        | 0       | 0        | 0        | 0       | 0       | 0       | 1       | 1        | 0       | 0       | 0        | 1       | 1       | 1       | 0       | 0       | 0        | 0       | 1       |
| Syntrophomonas         | 2              | 58             | 0        | 0       | 0        | 0        | 0       | 1       | 0       | 0       | 0        | 0       | 0       | 0        | 0       | 1       | 1       | 0       | 0       | 0        | 0       | 0       |
| Syntrophothermus       | 2              | 60             | 0        | 0       | 0        | 0        | 0       | 1       | 0       | 0       | 0        | 0       | 0       | 0        | 0       | 1       | 1       | 0       | 0       | 0        | 0       | 0       |
| Syntrophus             | 2              | 66             | 0        | 0       | 0        | 0        | 0       | 0       | 0       | 0       | 0        | 0       | 0       | 0        | 0       | 1       | 1       | 0       | 0       | 0        | 0       | 1       |
| Tannerella             | 1              | 8              | 0        | 0       | 0        | 0        | 0       | 0       | 0       | 0       | 0        | 0       | 0       | 0        | 0       | 0       | 0       | 0       | 0       | 0        | 0       | 0       |
| Taylorella             | 1              | 43             | 0        | 0       | 0        | 0        | 0       | 0       | 0       | 0       | 0        | 0       | 0       | 0        | 0       | 1       | 0       | 0       | 0       | 0        | 0       | 0       |
| Tepidanaerobacter      | 2              | 55             | 0        | 0       | 0        | 0        | 0       | 0       | 1       | 0       | 0        | 0       | 0       | 0        | 0       | 1       | 1       | 0       | 0       | 0        | 0       | 0       |
| Teredinibacter         | 2              | 109            | 0        | 0       | 0        | 0        | 0       | 0       | 0       | 1       | 1        | 0       | 0       | 0        | 0       | 1       | 0       | 0       | 1       | 1        | 1       | 0       |
| Terrabacter            | 1              | 1              | 0        | 0       | 0        | 0        | 0       | 0       | 0       | 0       | 0        | 0       | 0       | 0        | 0       | 0       | 0       | 0       | 0       | 0        | 0       | 0       |
| Terriglobus            | 2              | 83             | 0        | 0       | 0        | 0        | 0       | 1       | 0       | 0       | 0        | 0       | 0       | 0        | 0       | 1       | 1       | 0       | 0       | 0        | 0       | 1       |
| Tetragenococcus        | 1              | 12             | 0        | 0       | 0        | 0        | 0       | 0       | 0       | 0       | 0        | 0       | 0       | 0        | 0       | 0       | 0       | 0       | 0       | 0        | 0       | 0       |
| Thalassiobium          | 1              | 11             | 0        | 0       | 0        | 0        | 0       | 0       | 0       | 1       | 0        | 0       | 0       | 0        | 1       | 0       | 0       | 0       | 0       | 0        | 0       | 0       |
| Thalassobacter         | 1              | 9              | 0        | 0       | 0        | 0        | 0       | 0       | 0       | 0       | 0        | 0       | 0       | 0        | 0       | 0       | 0       | 0       | 0       | 0        | 0       | 0       |
| Thalassolituus         | 1              | 12             | 0        | 0       | 0        | 0        | 0       | 0       | 0       | 0       | 0        | 0       | 0       | 0        | 0       | 0       | 0       | 0       | 0       | 0        | 0       | 0       |
| Thalassospira          | 1              | 2              | 0        | 0       | 0        | 0        | 0       | 0       | 0       | 1       | 0        | 0       | 0       | 0        | 0       | 0       | 0       | 0       | 0       | 0        | 0       | 0       |
| Thauera                | 1              | 111            | 0        | 0       | 0        | 0        | 0       | 0       | 0       | 1       | 0        | 0       | 0       | 0        | 0       | 1       | 0       | 0       | 0       | 0        | 0       | 0       |
| Thermacetogenium       | 1              | 7              | 0        | 0       | 0        | 0        | 0       | 0       | 0       | 0       | 0        | 0       | 0       | 0        | 0       | 0       | 0       | 0       | 0       | 0        | 0       | 0       |
| Thermaerobacter        | 2              | 79             | 0        | 0       | 0        | 0        | 0       | 1       | 1       | 0       | 1        | 0       | 0       | 0        | 0       | 1       | 0       | 0       | 0       | 0        | 0       | 1       |
| Thermanaerovibrio      | 2              | 58             | 0        | 0       | 0        | 0        | 0       | 1       | 1       | 0       | 1        | 0       | 1       | 0        | 1       | 1       | 1       | 0       | 0       | 0        | 0       | 1       |
| Thermincola            | 2              | 62             | 0        | 0       | 0        | 0        | 0       | 0       | 1       | 1       | 0        | 0       | 0       | 0        | 0       | 1       | 1       | 0       | 0       | 0        | 0       | 0       |
| Thermoanaerobacter     | 2              | 76             | 0        | 0       | 0        | 0        | 0       | 1       | 1       | 0       | 1        | 0       | 0       | 0        | 0       | 1       | 1       | 0       | 0       | 0        | 0       | 1       |
| Thermoanaerobacterium  | 2              | 64             | 0        | 0       | 0        | 0        | 0       | 1       | 1       | 0       | 0        | 0       | 0       | 0        | 0       | 1       | 1       | 0       | 0       | 0        | 0       | 1       |
| Thermobacillus         | 1              | 11             | 0        | 0       | 0        | 0        | 0       | 0       | 0       | 0       | 0        | 0       | 0       | 0        | 0       | 0       | 0       | 0       | 0       | 0        | 0       | 0       |
| Thermobaculum          | 2              | 62             | 0        | 0       | 0        | 0        | 0       | 0       | 0       | 0       | 0        | 0       | 0       | 0        | 0       | 0       | 0       | 0       | 0       | 0        | 0       | 1       |
| Thermobifida           | 2              | 72             | 1        | 0       | 0        | 0        | 1       | 0       | 0       | 0       | 1        | 0       | 0       | 0        | 0       | 1       | 0       | 0       | 0       | 0        | 0       | 1       |
| Thermobispora          | 2              | 109            | 1        | 0       | 0        | 0        | 1       | 1       | 0       | 1       | 1        | 0       | 0       | 0        | 0       | 1       | 1       | 0       | 0       | 0        | 0       | 1       |
| Thermococcus           | 1              | 13             | 0        | 0       | 0        | 0        | 0       | 0       | 0       | 0       | 0        | 0       | 0       | 0        | 0       | 0       | 0       | 0       | 0       | 0        | 0       | 0       |
| Thermocrinis           | 2              | 60             | 0        | 0       | 0        | 0        | 0       | 1       | 1       | 1       | 0        | 0       | 0       | 0        | 0       | 1       | 0       | 0       | 0       | 0        | 0       | 1       |
| Thermodesulfator       | 1              | 10             | 0        | 0       | 0        | 0        | 0       | 0       | 0       | 0       | 0        | 0       | 0       | 0        | 0       | 0       | 0       | 0       | 0       | 0        | 0       | 0       |
| Thermodesulfobacterium | 1              | 9              | 0        | 0       | 0        | 0        | 0       | 0       | 0       | 0       | 0        | 0       | 0       | 0        | 0       | 0       | 0       | 0       | 0       | 0        | 0       | 0       |

| Genus                       | Cluster Number | Protein Counts | 3.1.3.41 | 3.1.8.1 | 3.2.1.31 | 3.3.2.10 | 3.3.2.9 | 3.5.1.- | 3.5.1.4 | 3.5.1.5 | 3.5.1.54 | 3.5.1.6 | 3.5.2.- | 3.5.2.15 | 3.5.2.2 | 3.5.4.- | 3.5.4.5 | 3.5.5.1 | 3.5.5.7 | 3.5.99.3 | 3.6.1.7 | 3.7.1.- |   |
|-----------------------------|----------------|----------------|----------|---------|----------|----------|---------|---------|---------|---------|----------|---------|---------|----------|---------|---------|---------|---------|---------|----------|---------|---------|---|
| <b>Thermodesulfobium</b>    | 1              | 13             | 0        | 0       | 0        | 0        | 0       | 0       | 0       | 0       | 0        | 0       | 0       | 0        | 0       | 0       | 0       | 0       | 0       | 0        | 0       | 0       |   |
| <b>Thermodesulfobivrio</b>  | 2              | 60             | 0        | 0       | 0        | 0        | 0       | 1       | 0       | 0       | 0        | 0       | 0       | 0        | 0       | 1       | 0       | 0       | 0       | 0        | 0       | 1       | 0 |
| <b>Thermofilum</b>          | 1              | 9              | 0        | 0       | 0        | 0        | 0       | 0       | 0       | 0       | 0        | 0       | 0       | 0        | 0       | 0       | 0       | 0       | 0       | 0        | 0       | 0       | 0 |
| <b>Thermogladus</b>         | 1              | 7              | 0        | 0       | 0        | 0        | 0       | 0       | 0       | 0       | 0        | 0       | 0       | 0        | 0       | 0       | 0       | 0       | 0       | 0        | 0       | 0       | 0 |
| <b>Thermomicrobium</b>      | 2              | 92             | 0        | 0       | 0        | 0        | 1       | 1       | 1       | 1       | 1        | 0       | 0       | 0        | 0       | 0       | 0       | 0       | 0       | 0        | 0       | 1       | 0 |
| <b>Thermomonospora</b>      | 2              | 125            | 1        | 0       | 0        | 0        | 1       | 0       | 0       | 1       | 0        | 0       | 0       | 0        | 0       | 1       | 1       | 0       | 0       | 0        | 0       | 1       | 1 |
| <b>Thermoplasma</b>         | 1              | 11             | 0        | 0       | 0        | 0        | 0       | 0       | 0       | 0       | 0        | 0       | 0       | 0        | 0       | 0       | 0       | 0       | 0       | 0        | 0       | 0       | 0 |
| <b>Thermoplasmatales</b>    | 1              | 6              | 0        | 0       | 0        | 0        | 0       | 0       | 0       | 0       | 0        | 0       | 0       | 0        | 0       | 0       | 0       | 0       | 0       | 0        | 0       | 0       | 0 |
| <b>Thermoproteus</b>        | 1              | 12             | 0        | 0       | 0        | 0        | 0       | 0       | 0       | 0       | 0        | 0       | 0       | 0        | 0       | 0       | 0       | 0       | 0       | 0        | 0       | 0       | 0 |
| <b>Thermosediminibacter</b> | 2              | 64             | 0        | 0       | 0        | 0        | 0       | 1       | 1       | 0       | 1        | 0       | 0       | 0        | 0       | 1       | 1       | 0       | 0       | 0        | 0       | 1       | 0 |
| <b>Thermosipho</b>          | 2              | 70             | 0        | 0       | 0        | 0        | 0       | 0       | 0       | 0       | 0        | 0       | 0       | 0        | 1       | 0       | 1       | 0       | 0       | 1        | 0       | 0       | 0 |
| <b>Thermosphaera</b>        | 1              | 10             | 0        | 0       | 0        | 0        | 0       | 0       | 0       | 0       | 0        | 0       | 0       | 0        | 0       | 0       | 0       | 0       | 0       | 0        | 0       | 0       | 0 |
| <b>Thermosynechococcus</b>  | 1              | 6              | 0        | 0       | 0        | 0        | 0       | 0       | 0       | 0       | 0        | 0       | 0       | 0        | 0       | 0       | 0       | 0       | 0       | 0        | 0       | 0       | 0 |
| <b>Thermotoga</b>           | 2              | 80             | 0        | 0       | 0        | 0        | 0       | 0       | 0       | 0       | 0        | 0       | 0       | 0        | 0       | 1       | 1       | 0       | 0       | 0        | 0       | 1       | 0 |
| <b>Thermovibrio</b>         | 2              | 58             | 0        | 0       | 0        | 0        | 0       | 1       | 1       | 0       | 0        | 0       | 0       | 0        | 0       | 1       | 1       | 0       | 0       | 0        | 0       | 1       | 0 |
| <b>Thermovirga</b>          | 1              | 9              | 0        | 0       | 0        | 0        | 0       | 0       | 0       | 0       | 0        | 0       | 0       | 0        | 0       | 0       | 0       | 0       | 0       | 0        | 0       | 0       | 0 |
| <b>Thermus</b>              | 2              | 107            | 0        | 0       | 0        | 0        | 0       | 1       | 0       | 0       | 1        | 0       | 0       | 0        | 0       | 0       | 1       | 0       | 0       | 0        | 0       | 1       | 0 |
| <b>Thioalkalimicrobium</b>  | 1              | 4              | 0        | 0       | 0        | 0        | 0       | 0       | 0       | 0       | 0        | 0       | 0       | 0        | 0       | 0       | 0       | 0       | 0       | 0        | 0       | 0       | 0 |
| <b>Thioalkalivibrio</b>     | 2              | 91             | 0        | 0       | 0        | 0        | 0       | 1       | 1       | 1       | 1        | 0       | 0       | 0        | 0       | 1       | 0       | 0       | 0       | 0        | 0       | 1       | 0 |
| <b>Thiobaca</b>             | 1              | 2              | 0        | 0       | 0        | 0        | 0       | 0       | 0       | 0       | 0        | 0       | 0       | 0        | 0       | 0       | 0       | 0       | 0       | 0        | 0       | 0       | 0 |
| <b>Thiobacillus</b>         | 2              | 67             | 0        | 0       | 0        | 0        | 0       | 0       | 0       | 0       | 1        | 0       | 0       | 0        | 0       | 1       | 0       | 0       | 0       | 0        | 0       | 1       | 0 |
| <b>Thiocapsa</b>            | 1              | 2              | 0        | 0       | 0        | 0        | 0       | 0       | 0       | 0       | 0        | 0       | 0       | 0        | 0       | 0       | 0       | 0       | 0       | 0        | 0       | 0       | 0 |
| <b>Thiocystis</b>           | 1              | 11             | 0        | 0       | 0        | 0        | 0       | 0       | 0       | 0       | 0        | 0       | 0       | 0        | 0       | 0       | 0       | 0       | 0       | 0        | 0       | 0       | 0 |
| <b>Thioflavococcus</b>      | 1              | 13             | 0        | 0       | 0        | 0        | 0       | 0       | 0       | 0       | 0        | 0       | 0       | 0        | 0       | 0       | 0       | 0       | 0       | 0        | 0       | 0       | 0 |
| <b>Thiomicrospira</b>       | 2              | 50             | 0        | 0       | 0        | 0        | 0       | 0       | 0       | 0       | 1        | 0       | 0       | 0        | 0       | 1       | 0       | 0       | 0       | 0        | 0       | 0       | 0 |
| <b>Thiomonas</b>            | 2              | 85             | 0        | 0       | 0        | 0        | 0       | 1       | 0       | 0       | 0        | 0       | 0       | 0        | 0       | 1       | 0       | 0       | 0       | 0        | 0       | 1       | 0 |
| <b>Thiorhodococcus</b>      | 1              | 2              | 0        | 0       | 0        | 0        | 0       | 0       | 0       | 0       | 0        | 0       | 0       | 0        | 0       | 0       | 0       | 0       | 0       | 0        | 0       | 0       | 0 |
| <b>Thiothrix</b>            | 1              | 2              | 0        | 0       | 0        | 0        | 0       | 0       | 0       | 0       | 0        | 0       | 0       | 0        | 0       | 0       | 0       | 0       | 0       | 0        | 0       | 0       | 0 |
| <b>Tistrella</b>            | 1              | 42             | 0        | 0       | 0        | 0        | 0       | 0       | 0       | 0       | 0        | 0       | 0       | 0        | 0       | 0       | 0       | 0       | 0       | 0        | 0       | 0       | 0 |
| <b>Tolumonas</b>            | 2              | 100            | 0        | 0       | 1        | 0        | 0       | 0       | 1       | 1       | 1        | 0       | 0       | 0        | 0       | 1       | 1       | 0       | 0       | 0        | 0       | 1       | 0 |
| <b>Transposon</b>           | 1              | 2              | 0        | 0       | 1        | 0        | 0       | 0       | 0       | 0       | 0        | 0       | 0       | 0        | 0       | 0       | 0       | 0       | 0       | 0        | 0       | 0       | 0 |
| <b>Treponema</b>            | 1              | 63             | 0        | 0       | 0        | 0        | 1       | 0       | 0       | 0       | 0        | 0       | 0       | 0        | 0       | 0       | 1       | 0       | 0       | 0        | 0       | 1       | 0 |
| <b>Trichodesmium</b>        | 2              | 71             | 0        | 0       | 0        | 0        | 1       | 0       | 0       | 1       | 0        | 0       | 0       | 0        | 0       | 1       | 0       | 0       | 0       | 0        | 0       | 0       | 0 |
| <b>Trichormus</b>           | 1              | 12             | 0        | 0       | 0        | 0        | 0       | 0       | 0       | 0       | 0        | 0       | 0       | 0        | 0       | 0       | 0       | 0       | 0       | 0        | 0       | 0       | 0 |
| <b>Tropheryma</b>           | 2              | 22             | 0        | 0       | 0        | 0        | 0       | 0       | 0       | 0       | 0        | 0       | 0       | 0        | 0       | 1       | 0       | 0       | 0       | 0        | 0       | 0       | 0 |
| <b>Truepera</b>             | 2              | 104            | 0        | 0       | 0        | 0        | 1       | 1       | 1       | 0       | 1        | 0       | 1       | 0        | 1       | 1       | 1       | 0       | 0       | 0        | 0       | 1       | 1 |
| <b>Tsukamurella</b>         | 2              | 123            | 1        | 0       | 0        | 0        | 1       | 1       | 0       | 1       | 1        | 0       | 0       | 0        | 1       | 1       | 1       | 0       | 0       | 0        | 0       | 1       | 1 |
| <b>Turneriella</b>          | 1              | 16             | 0        | 0       | 0        | 0        | 0       | 0       | 0       | 0       | 0        | 0       | 0       | 0        | 0       | 0       | 0       | 0       | 0       | 0        | 0       | 0       | 0 |
| <b>Uliginosibacterium</b>   | 1              | 2              | 0        | 0       | 0        | 0        | 0       | 0       | 0       | 1       | 0        | 0       | 0       | 0        | 0       | 0       | 0       | 0       | 0       | 0        | 0       | 0       | 0 |
| <b>Ureaplasma</b>           | 1              | 24             | 0        | 0       | 0        | 0        | 0       | 0       | 0       | 1       | 0        | 0       | 0       | 0        | 0       | 0       | 1       | 0       | 0       | 0        | 0       | 0       | 0 |
| <b>Ureibacillus</b>         | 1              | 2              | 0        | 0       | 0        | 0        | 0       | 0       | 0       | 0       | 0        | 0       | 0       | 0        | 0       | 0       | 0       | 0       | 0       | 0        | 0       | 0       | 0 |
| <b>Variovorax</b>           | 3              | 187            | 0        | 0       | 0        | 0        | 1       | 1       | 1       | 1       | 1        | 1       | 0       | 0        | 1       | 1       | 0       | 1       | 1       | 1        | 1       | 1       | 1 |
| <b>Veillonella</b>          | 1              | 54             | 0        | 0       | 0        | 0        | 0       | 1       | 1       | 0       | 1        | 0       | 0       | 0        | 1       | 0       | 1       | 0       | 0       | 0        | 0       | 0       | 0 |
| <b>Verminephrobacter</b>    | 3              | 188            | 0        | 0       | 0        | 0        | 0       | 0       | 1       | 1       | 1        | 1       | 0       | 0        | 1       | 0       | 0       | 0       | 1       | 0        | 0       | 0       | 1 |
| <b>Verrucosispora</b>       | 3              | 126            | 1        | 0       | 0        | 0        | 1       | 1       | 1       | 1       | 1        | 0       | 0       | 0        | 0       | 1       | 1       | 0       | 0       | 0        | 0       | 0       | 0 |
| <b>Vibrio</b>               | 2              | 195            | 0        | 0       | 0        | 0        | 0       | 0       | 0       | 1       | 1        | 0       | 0       | 0        | 0       | 1       | 1       | 0       | 0       | 0        | 0       | 1       | 1 |
| <b>Vibrionales</b>          | 1              | 46             | 0        | 0       | 0        | 0        | 0       | 0       | 0       | 0       | 0        | 0       | 0       | 0        | 0       | 0       | 0       | 0       | 0       | 0        | 0       | 0       | 0 |
| <b>Vitreoscilla</b>         | 1              | 1              | 0        | 0       | 0        | 0        | 0       | 0       | 0       | 0       | 0        | 0       | 0       | 0        | 0       | 0       | 0       | 0       | 0       | 0        | 0       | 0       | 0 |
| <b>Vulcanisaeta</b>         | 1              | 14             | 0        | 0       | 0        | 0        | 0       | 0       | 0       | 0       | 0        | 0       | 0       | 0        | 0       | 0       | 0       | 0       | 0       | 0        | 0       | 0       | 0 |
| <b>Waddlia</b>              | 2              | 68             | 0        | 0       | 0        | 0        | 0       | 1       | 0       | 0       | 1        | 0       | 0       | 0        | 0       | 1       | 0       | 0       | 0       | 0        | 0       | 1       | 0 |
| <b>Wautersia</b>            | 1              | 2              | 0        | 0       | 0        | 0        | 0       | 0       | 0       | 0       | 0        | 0       | 0       | 0        | 0       | 0       | 0       | 0       | 0       | 0        | 0       | 0       | 0 |
| <b>Weeksella</b>            | 2              | 65             | 0        | 0       | 0        | 0        | 0       | 0       | 0       | 0       | 0        | 0       | 0       | 0        | 0       | 1       | 1       | 0       | 0       | 0        | 0       | 0       | 1 |

| Genus             | Cluster Number | Protein Counts | 3.1.3.41 | 3.1.8.1 | 3.2.1.31 | 3.3.2.10 | 3.3.2.9 | 3.5.1.- | 3.5.1.4 | 3.5.1.5 | 3.5.1.54 | 3.5.1.6 | 3.5.2.- | 3.5.2.15 | 3.5.2.2 | 3.5.4.- | 3.5.4.5 | 3.5.5.1 | 3.5.5.7 | 3.5.99.3 | 3.6.1.7 | 3.7.1.- |
|-------------------|----------------|----------------|----------|---------|----------|----------|---------|---------|---------|---------|----------|---------|---------|----------|---------|---------|---------|---------|---------|----------|---------|---------|
| Weissella         | 1              | 14             | 0        | 0       | 0        | 0        | 0       | 0       | 0       | 0       | 0        | 0       | 0       | 0        | 0       | 0       | 0       | 0       | 0       | 0        | 0       | 0       |
| Wenxinia          | 1              | 2              | 0        | 0       | 0        | 0        | 0       | 0       | 0       | 1       | 0        | 0       | 0       | 0        | 0       | 0       | 0       | 0       | 0       | 0        | 0       | 0       |
| Wigglesworthia    | 1              | 29             | 0        | 0       | 0        | 0        | 0       | 0       | 0       | 0       | 0        | 0       | 0       | 0        | 0       | 1       | 0       | 0       | 0       | 0        | 0       | 0       |
| Wolbachia         | 1              | 32             | 0        | 0       | 0        | 0        | 0       | 0       | 0       | 0       | 0        | 0       | 0       | 0        | 0       | 1       | 0       | 0       | 0       | 0        | 0       | 0       |
| Wolinella         | 2              | 51             | 0        | 0       | 0        | 0        | 0       | 0       | 0       | 0       | 1        | 0       | 0       | 0        | 0       | 0       | 0       | 0       | 0       | 0        | 0       | 0       |
| Xanthobacter      | 3              | 176            | 0        | 0       | 0        | 0        | 0       | 1       | 0       | 1       | 1        | 1       | 0       | 0        | 0       | 1       | 1       | 1       | 0       | 0        | 1       | 1       |
| Xanthobacteraceae | 1              | 4              | 0        | 0       | 0        | 0        | 0       | 0       | 1       | 1       | 0        | 0       | 0       | 0        | 0       | 0       | 0       | 0       | 0       | 0        | 0       | 0       |
| Xanthomonadaceae  | 1              | 39             | 0        | 0       | 0        | 0        | 1       | 0       | 0       | 0       | 0        | 0       | 0       | 0        | 0       | 0       | 0       | 0       | 0       | 0        | 0       | 0       |
| Xanthomonas       | 2              | 162            | 0        | 0       | 0        | 0        | 0       | 0       | 0       | 0       | 1        | 0       | 0       | 0        | 0       | 1       | 0       | 0       | 0       | 0        | 1       | 0       |
| Xenorhabdus       | 2              | 127            | 0        | 0       | 0        | 0        | 0       | 1       | 0       | 0       | 1        | 0       | 0       | 0        | 0       | 1       | 1       | 0       | 1       | 0        | 1       | 1       |
| Xylanimonas       | 2              | 66             | 1        | 0       | 0        | 0        | 1       | 0       | 0       | 0       | 1        | 0       | 0       | 0        | 0       | 1       | 1       | 0       | 0       | 0        | 0       | 0       |
| Xylella           | 2              | 52             | 0        | 0       | 0        | 0        | 0       | 0       | 0       | 0       | 0        | 0       | 0       | 0        | 0       | 1       | 0       | 0       | 0       | 0        | 0       | 0       |
| Yersinia          | 2              | 145            | 0        | 0       | 0        | 0        | 0       | 0       | 1       | 1       | 1        | 0       | 0       | 0        | 0       | 1       | 1       | 1       | 0       | 0        | 1       | 1       |
| Yokenella         | 2              | 61             | 0        | 0       | 0        | 0        | 0       | 0       | 0       | 0       | 0        | 0       | 0       | 0        | 0       | 0       | 0       | 0       | 0       | 0        | 0       | 0       |
| Zobellia          | 1              | 28             | 0        | 0       | 0        | 0        | 0       | 0       | 0       | 0       | 0        | 0       | 0       | 0        | 0       | 0       | 0       | 0       | 0       | 0        | 0       | 0       |
| Zunongwangia      | 2              | 98             | 0        | 0       | 0        | 0        | 0       | 0       | 0       | 0       | 1        | 0       | 0       | 0        | 0       | 1       | 1       | 0       | 0       | 0        | 0       | 1       |
| Zymomonas         | 2              | 67             | 0        | 0       | 0        | 0        | 0       | 0       | 0       | 0       | 0        | 0       | 0       | 0        | 0       | 0       | 1       | 1       | 0       | 0        | 0       | 0       |
| Zymophilus        | 1              | 2              | 0        | 0       | 0        | 0        | 0       | 0       | 0       | 0       | 0        | 0       | 0       | 0        | 0       | 0       | 0       | 0       | 0       | 0        | 0       | 0       |

| Genus               | Cluster Number | Protein Counts | 3.7.1.2 | 3.7.1.9 | 3.8.1.- | 3.8.1.2 | 3.8.1.3 | 3.8.1.5 | 4.1.1.- | 4.1.1.44 | 4.1.1.55 | 4.1.1.7 | 4.1.1.70 | 4.1.1.77 | 4.1.2.- | 4.1.3.- | 4.1.3.39 | 4.1.99.- | 4.1.99.11 | 4.2.1.- | 4.2.1.17 |
|---------------------|----------------|----------------|---------|---------|---------|---------|---------|---------|---------|----------|----------|---------|----------|----------|---------|---------|----------|----------|-----------|---------|----------|
| Acaricomes          | 1              | 2              | 0       | 0       | 0       | 0       | 0       | 0       | 0       | 0        | 0        | 0       | 0        | 0        | 0       | 0       | 0        | 0        | 0         | 0       | 0        |
| Acaryochloris       | 2              | 88             | 0       | 0       | 0       | 1       | 0       | 1       | 1       | 0        | 0        | 0       | 0        | 0        | 0       | 1       | 0        | 0        | 0         | 1       | 1        |
| Acetivibrio         | 1              | 2              | 0       | 0       | 0       | 0       | 0       | 0       | 0       | 0        | 0        | 0       | 0        | 0        | 0       | 0       | 0        | 0        | 0         | 0       | 0        |
| Acetobacter         | 2              | 85             | 0       | 0       | 0       | 0       | 0       | 0       | 1       | 0        | 0        | 1       | 0        | 0        | 1       | 1       | 0        | 0        | 0         | 1       | 0        |
| Acetobacteraceae    | 1              | 2              | 0       | 0       | 0       | 0       | 0       | 0       | 0       | 0        | 0        | 0       | 0        | 0        | 0       | 0       | 0        | 0        | 0         | 0       | 0        |
| Acetobacterium      | 1              | 8              | 0       | 0       | 0       | 0       | 0       | 0       | 0       | 0        | 0        | 0       | 0        | 0        | 0       | 0       | 0        | 0        | 0         | 0       | 0        |
| Acetohalobium       | 2              | 79             | 0       | 0       | 0       | 0       | 0       | 0       | 1       | 0        | 0        | 0       | 0        | 0        | 1       | 1       | 0        | 1        | 0         | 1       | 0        |
| Acholeplasma        | 2              | 38             | 0       | 0       | 0       | 1       | 0       | 0       | 0       | 0        | 0        | 0       | 0        | 0        | 0       | 0       | 0        | 0        | 0         | 1       | 0        |
| Achromobacter       | 2              | 192            | 1       | 0       | 0       | 0       | 0       | 1       | 1       | 1        | 0        | 0       | 0        | 1        | 1       | 1       | 1        | 0        | 0         | 1       | 1        |
| Acidaminococcus     | 1              | 65             | 0       | 0       | 0       | 0       | 0       | 1       | 1       | 1        | 0        | 0       | 1        | 0        | 0       | 1       | 0        | 0        | 0         | 1       | 1        |
| Acidianus           | 1              | 9              | 0       | 0       | 0       | 0       | 0       | 0       | 0       | 0        | 0        | 0       | 0        | 0        | 0       | 0       | 0        | 0        | 0         | 0       | 0        |
| Acidilobus          | 1              | 8              | 0       | 0       | 0       | 0       | 0       | 0       | 0       | 0        | 0        | 0       | 0        | 0        | 0       | 0       | 0        | 0        | 0         | 0       | 0        |
| Acidimicrobium      | 2              | 58             | 1       | 0       | 0       | 0       | 0       | 0       | 0       | 1        | 0        | 0       | 0        | 0        | 0       | 1       | 0        | 0        | 0         | 1       | 1        |
| Acidiphilium        | 3              | 144            | 1       | 0       | 1       | 1       | 0       | 1       | 0       | 1        | 0        | 0       | 0        | 0        | 1       | 1       | 0        | 0        | 0         | 1       | 1        |
| Acidithiobacillus   | 2              | 70             | 0       | 0       | 0       | 0       | 0       | 0       | 1       | 0        | 0        | 1       | 0        | 0        | 0       | 1       | 0        | 0        | 0         | 1       | 0        |
| Acidobacterium      | 2              | 91             | 1       | 0       | 0       | 0       | 0       | 0       | 1       | 0        | 0        | 1       | 0        | 0        | 0       | 1       | 0        | 0        | 0         | 1       | 1        |
| Acidocella          | 1              | 2              | 0       | 0       | 0       | 0       | 0       | 0       | 0       | 0        | 0        | 0       | 0        | 0        | 0       | 0       | 0        | 0        | 0         | 0       | 0        |
| Acidothermus        | 2              | 68             | 0       | 0       | 0       | 1       | 0       | 0       | 1       | 1        | 0        | 0       | 0        | 0        | 0       | 1       | 0        | 0        | 0         | 0       | 1        |
| Acidovorax          | 3              | 217            | 1       | 1       | 0       | 1       | 0       | 1       | 1       | 1        | 0        | 0       | 0        | 1        | 1       | 1       | 1        | 0        | 0         | 1       | 1        |
| Aciduliprofundum    | 1              | 11             | 0       | 0       | 0       | 0       | 0       | 0       | 0       | 0        | 0        | 0       | 0        | 0        | 0       | 0       | 0        | 0        | 0         | 0       | 0        |
| Acinetobacter       | 3              | 188            | 1       | 0       | 0       | 0       | 0       | 0       | 1       | 1        | 0        | 0       | 0        | 0        | 0       | 1       | 0        | 0        | 0         | 1       | 1        |
| Actinobacillus      | 2              | 112            | 0       | 0       | 0       | 1       | 0       | 0       | 1       | 1        | 0        | 0       | 0        | 0        | 1       | 1       | 0        | 0        | 0         | 1       | 1        |
| Actinomadura        | 1              | 1              | 0       | 0       | 0       | 0       | 0       | 0       | 0       | 0        | 0        | 0       | 0        | 0        | 0       | 0       | 0        | 0        | 0         | 0       | 0        |
| Actinoplanes        | 1              | 52             | 0       | 0       | 0       | 0       | 0       | 0       | 0       | 0        | 0        | 0       | 0        | 0        | 0       | 0       | 0        | 0        | 0         | 0       | 0        |
| Actinopolyspora     | 1              | 2              | 0       | 0       | 0       | 0       | 0       | 0       | 0       | 0        | 0        | 0       | 0        | 0        | 0       | 0       | 0        | 0        | 0         | 0       | 0        |
| Actinosynnema       | 2              | 122            | 1       | 0       | 0       | 1       | 0       | 0       | 0       | 1        | 0        | 0       | 0        | 0        | 1       | 1       | 0        | 0        | 0         | 0       | 1        |
| Advenella           | 1              | 30             | 0       | 0       | 0       | 0       | 0       | 0       | 0       | 0        | 0        | 0       | 0        | 0        | 0       | 0       | 0        | 0        | 0         | 0       | 0        |
| Aequorivita         | 1              | 12             | 0       | 0       | 0       | 0       | 0       | 0       | 0       | 0        | 0        | 0       | 0        | 0        | 0       | 0       | 0        | 0        | 0         | 0       | 0        |
| Aerococcus          | 2              | 57             | 0       | 0       | 0       | 1       | 0       | 0       | 0       | 1        | 0        | 0       | 0        | 0        | 0       | 0       | 0        | 0        | 0         | 1       | 1        |
| Aeromonas           | 2              | 127            | 1       | 0       | 0       | 1       | 0       | 0       | 1       | 1        | 0        | 0       | 0        | 0        | 0       | 1       | 0        | 0        | 0         | 1       | 1        |
| Aeropyrum           | 1              | 13             | 0       | 0       | 0       | 0       | 0       | 0       | 0       | 0        | 0        | 0       | 0        | 0        | 0       | 0       | 0        | 0        | 0         | 0       | 0        |
| Afipia              | 1              | 54             | 1       | 0       | 0       | 1       | 0       | 0       | 0       | 1        | 0        | 0       | 0        | 0        | 0       | 1       | 0        | 0        | 0         | 1       | 0        |
| Aggregatibacter     | 1              | 81             | 0       | 0       | 0       | 1       | 0       | 0       | 1       | 1        | 0        | 0       | 0        | 0        | 0       | 1       | 0        | 0        | 0         | 1       | 0        |
| Agrobacterium       | 2              | 242            | 1       | 1       | 0       | 1       | 0       | 1       | 1       | 1        | 1        | 1       | 0        | 1        | 1       | 1       | 0        | 0        | 0         | 1       | 1        |
| Ahrensia            | 1              | 2              | 0       | 0       | 0       | 0       | 0       | 0       | 0       | 0        | 0        | 0       | 0        | 0        | 0       | 0       | 0        | 0        | 0         | 0       | 0        |
| Akkermansia         | 2              | 47             | 0       | 0       | 0       | 0       | 0       | 0       | 1       | 1        | 0        | 0       | 0        | 0        | 0       | 1       | 0        | 0        | 0         | 0       | 0        |
| Albidiferax         | 3              | 144            | 1       | 0       | 0       | 1       | 0       | 1       | 1       | 1        | 0        | 0       | 0        | 0        | 1       | 1       | 1        | 0        | 0         | 1       | 1        |
| Alcaligenes         | 1              | 21             | 0       | 0       | 0       | 0       | 0       | 0       | 0       | 0        | 0        | 0       | 0        | 1        | 0       | 0       | 0        | 0        | 0         | 0       | 0        |
| Alcanivorax         | 2              | 146            | 0       | 0       | 0       | 1       | 0       | 1       | 1       | 0        | 0        | 0       | 0        | 0        | 0       | 1       | 0        | 0        | 0         | 1       | 1        |
| Alicyclophilus      | 3              | 152            | 0       | 1       | 0       | 0       | 0       | 1       | 1       | 0        | 0        | 0       | 0        | 1        | 1       | 1       | 1        | 0        | 0         | 1       | 1        |
| Alicyclobacillus    | 2              | 91             | 0       | 0       | 0       | 1       | 0       | 0       | 0       | 0        | 0        | 0       | 0        | 1        | 0       | 1       | 1        | 0        | 0         | 1       | 1        |
| Aliivibrio          | 2              | 118            | 0       | 0       | 0       | 0       | 0       | 0       | 1       | 0        | 0        | 0       | 0        | 0        | 0       | 1       | 0        | 0        | 0         | 1       | 1        |
| Alishewanella       | 1              | 1              | 0       | 0       | 0       | 0       | 0       | 0       | 0       | 0        | 0        | 0       | 0        | 0        | 0       | 0       | 0        | 0        | 0         | 0       | 0        |
| Alistipes           | 1              | 52             | 0       | 0       | 0       | 0       | 0       | 0       | 1       | 1        | 0        | 0       | 0        | 0        | 0       | 1       | 0        | 0        | 0         | 1       | 0        |
| Alkalilimnicola     | 2              | 97             | 0       | 1       | 0       | 1       | 0       | 1       | 1       | 1        | 0        | 0       | 0        | 1        | 0       | 1       | 1        | 0        | 0         | 1       | 1        |
| Alkaliphilus        | 2              | 62             | 0       | 0       | 0       | 0       | 0       | 0       | 0       | 1        | 0        | 0       | 0        | 0        | 0       | 0       | 0        | 1        | 0         | 1       | 0        |
| Allochromatium      | 2              | 84             | 0       | 0       | 0       | 0       | 0       | 1       | 1       | 0        | 0        | 0       | 0        | 0        | 0       | 1       | 0        | 0        | 0         | 1       | 0        |
| Alphaproteobacteria | 1              | 3              | 0       | 0       | 0       | 0       | 0       | 0       | 0       | 0        | 0        | 0       | 0        | 0        | 0       | 0       | 0        | 0        | 0         | 0       | 1        |
| Alteromonadales     | 1              | 12             | 0       | 0       | 0       | 0       | 0       | 0       | 0       | 0        | 0        | 0       | 0        | 0        | 0       | 0       | 0        | 0        | 0         | 1       | 0        |
| Alteromonas         | 1              | 37             | 0       | 0       | 0       | 0       | 0       | 0       | 0       | 0        | 0        | 0       | 0        | 0        | 0       | 0       | 0        | 0        | 0         | 0       | 0        |
| Aminobacter         | 1              | 4              | 0       | 0       | 0       | 0       | 0       | 0       | 0       | 0        | 0        | 0       | 0        | 0        | 0       | 0       | 0        | 0        | 0         | 0       | 0        |
| Aminobacterium      | 2              | 59             | 0       | 0       | 0       | 0       | 0       | 0       | 0       | 0        | 0        | 0       | 0        | 0        | 1       | 1       | 0        | 0        | 0         | 1       | 0        |

| Genus            | Cluster Number | Protein Counts | 3.7.1.2 | 3.7.1.9 | 3.8.1.- | 3.8.1.2 | 3.8.1.3 | 3.8.1.5 | 4.1.1.- | 4.1.1.44 | 4.1.1.55 | 4.1.1.7 | 4.1.1.70 | 4.1.1.77 | 4.1.2.- | 4.1.3.- | 4.1.3.39 | 4.1.99.- | 4.1.99.11 | 4.2.1.- | 4.2.1.17 |
|------------------|----------------|----------------|---------|---------|---------|---------|---------|---------|---------|----------|----------|---------|----------|----------|---------|---------|----------|----------|-----------|---------|----------|
| Ammonifex        | 2              | 50             | 0       | 0       | 0       | 0       | 0       | 0       | 1       | 0        | 0        | 0       | 0        | 0        | 0       | 1       | 0        | 0        | 0         | 1       | 0        |
| Amphibacillus    | 1              | 13             | 0       | 0       | 0       | 0       | 0       | 0       | 0       | 0        | 0        | 0       | 0        | 0        | 0       | 0       | 0        | 0        | 0         | 0       | 0        |
| Amphritea        | 1              | 2              | 0       | 0       | 0       | 0       | 0       | 0       | 0       | 0        | 0        | 0       | 0        | 0        | 0       | 0       | 0        | 0        | 0         | 0       | 0        |
| Amycolatopsis    | 2              | 201            | 1       | 1       | 0       | 1       | 0       | 1       | 0       | 1        | 1        | 1       | 0        | 1        | 0       | 1       | 0        | 0        | 0         | 1       | 1        |
| Amycolobicoccus  | 1              | 43             | 0       | 0       | 0       | 0       | 0       | 0       | 0       | 0        | 0        | 0       | 0        | 0        | 0       | 0       | 0        | 0        | 0         | 0       | 0        |
| Anabaena         | 2              | 92             | 0       | 0       | 0       | 1       | 0       | 1       | 1       | 0        | 0        | 0       | 0        | 0        | 0       | 1       | 0        | 0        | 0         | 1       | 1        |
| Anaerobaculum    | 1              | 11             | 0       | 0       | 0       | 0       | 0       | 0       | 0       | 0        | 0        | 0       | 0        | 0        | 0       | 0       | 0        | 0        | 0         | 0       | 0        |
| Anaerococcus     | 2              | 46             | 0       | 0       | 0       | 0       | 0       | 0       | 0       | 0        | 0        | 0       | 0        | 0        | 0       | 0       | 0        | 0        | 0         | 1       | 0        |
| Anaerolinea      | 2              | 66             | 0       | 0       | 0       | 0       | 0       | 0       | 0       | 0        | 0        | 0       | 0        | 0        | 0       | 1       | 0        | 0        | 0         | 1       | 0        |
| Anaeromyxobacter | 3              | 117            | 1       | 1       | 0       | 1       | 1       | 1       | 1       | 0        | 0        | 0       | 0        | 0        | 0       | 1       | 0        | 0        | 0         | 1       | 1        |
| Anaerostipes     | 1              | 44             | 0       | 0       | 0       | 1       | 0       | 0       | 1       | 1        | 0        | 0       | 0        | 0        | 0       | 1       | 0        | 0        | 0         | 0       | 0        |
| Anaerotruncus    | 1              | 2              | 0       | 0       | 0       | 0       | 0       | 0       | 0       | 0        | 0        | 0       | 0        | 0        | 0       | 0       | 0        | 0        | 0         | 0       | 0        |
| Anaplasma        | 1              | 35             | 0       | 0       | 0       | 0       | 0       | 0       | 1       | 0        | 0        | 0       | 0        | 0        | 0       | 0       | 0        | 0        | 0         | 1       | 1        |
| Ancylobacter     | 1              | 3              | 0       | 0       | 0       | 0       | 0       | 0       | 0       | 0        | 0        | 0       | 0        | 0        | 0       | 0       | 0        | 0        | 0         | 0       | 0        |
| Aneurinibacillus | 1              | 1              | 0       | 0       | 0       | 0       | 0       | 0       | 0       | 0        | 0        | 0       | 0        | 0        | 0       | 0       | 0        | 0        | 0         | 0       | 0        |
| Angomonas        | 1              | 1              | 0       | 0       | 0       | 0       | 0       | 0       | 0       | 0        | 0        | 0       | 0        | 0        | 0       | 0       | 0        | 0        | 0         | 0       | 0        |
| Anoxybacillus    | 2              | 72             | 0       | 0       | 0       | 1       | 0       | 0       | 0       | 1        | 0        | 0       | 0        | 0        | 0       | 1       | 0        | 1        | 0         | 1       | 1        |
| Aquifex          | 2              | 45             | 0       | 0       | 0       | 0       | 0       | 0       | 0       | 0        | 0        | 0       | 0        | 0        | 0       | 1       | 0        | 0        | 0         | 1       | 0        |
| Aquimarina       | 1              | 2              | 0       | 0       | 0       | 0       | 0       | 0       | 0       | 0        | 0        | 0       | 0        | 0        | 0       | 0       | 0        | 0        | 0         | 0       | 0        |
| Arcanobacterium  | 2              | 45             | 0       | 0       | 0       | 0       | 0       | 0       | 0       | 0        | 0        | 0       | 0        | 0        | 0       | 0       | 0        | 0        | 0         | 0       | 0        |
| Archaeoglobus    | 1              | 14             | 0       | 0       | 0       | 0       | 0       | 0       | 0       | 0        | 0        | 0       | 0        | 0        | 0       | 0       | 0        | 0        | 0         | 0       | 0        |
| Arcobacter       | 2              | 101            | 0       | 0       | 0       | 0       | 0       | 0       | 1       | 1        | 0        | 0       | 0        | 0        | 0       | 1       | 1        | 1        | 0         | 1       | 1        |
| Aromatoleum      | 3              | 133            | 1       | 0       | 0       | 1       | 0       | 0       | 1       | 0        | 0        | 0       | 0        | 0        | 0       | 1       | 0        | 0        | 1         | 1       | 1        |
| Arsenophonus     | 1              | 4              | 0       | 0       | 0       | 0       | 0       | 0       | 0       | 0        | 0        | 0       | 0        | 0        | 0       | 0       | 0        | 0        | 0         | 0       | 0        |
| Arthrobacter     | 2              | 206            | 1       | 0       | 0       | 1       | 1       | 1       | 0       | 1        | 0        | 1       | 0        | 0        | 1       | 1       | 1        | 1        | 0         | 1       | 1        |
| Arthrospira      | 2              | 67             | 0       | 0       | 0       | 0       | 0       | 1       | 1       | 0        | 0        | 0       | 0        | 0        | 1       | 1       | 0        | 0        | 0         | 0       | 0        |
| Aster            | 1              | 10             | 0       | 0       | 0       | 0       | 0       | 0       | 0       | 0        | 0        | 0       | 0        | 0        | 0       | 0       | 0        | 0        | 0         | 0       | 0        |
| Asticcacaulis    | 2              | 103            | 1       | 0       | 0       | 0       | 0       | 0       | 1       | 1        | 0        | 0       | 0        | 0        | 0       | 1       | 0        | 0        | 0         | 1       | 1        |
| Atopobium        | 1              | 28             | 0       | 0       | 0       | 0       | 0       | 0       | 0       | 0        | 0        | 0       | 0        | 0        | 0       | 0       | 0        | 0        | 0         | 0       | 0        |
| Aurantimonas     | 1              | 2              | 0       | 0       | 0       | 0       | 0       | 0       | 0       | 0        | 0        | 0       | 0        | 0        | 0       | 0       | 0        | 0        | 0         | 0       | 0        |
| Avibacterium     | 1              | 17             | 0       | 0       | 0       | 0       | 0       | 0       | 0       | 0        | 0        | 0       | 0        | 0        | 0       | 0       | 0        | 0        | 0         | 1       | 0        |
| Azoarcus         | 3              | 172            | 1       | 0       | 0       | 0       | 0       | 0       | 1       | 1        | 0        | 0       | 0        | 1        | 0       | 1       | 1        | 0        | 0         | 1       | 1        |
| Azorhizobium     | 3              | 149            | 0       | 0       | 0       | 0       | 0       | 1       | 0       | 1        | 0        | 0       | 0        | 0        | 1       | 1       | 0        | 0        | 0         | 1       | 1        |
| Azorhizophilus   | 1              | 4              | 0       | 0       | 0       | 0       | 0       | 0       | 0       | 0        | 0        | 0       | 0        | 0        | 0       | 0       | 0        | 0        | 0         | 0       | 0        |
| Azospira         | 1              | 19             | 0       | 0       | 0       | 0       | 0       | 0       | 0       | 0        | 0        | 0       | 0        | 0        | 0       | 0       | 0        | 0        | 0         | 0       | 0        |
| Azospirillum     | 2              | 198            | 1       | 0       | 0       | 1       | 0       | 0       | 1       | 1        | 0        | 0       | 0        | 0        | 1       | 1       | 0        | 0        | 0         | 1       | 1        |
| Azotobacter      | 3              | 183            | 1       | 1       | 0       | 1       | 1       | 1       | 1       | 1        | 0        | 0       | 0        | 1        | 1       | 1       | 1        | 0        | 0         | 1       | 1        |
| Bacillales       | 1              | 9              | 0       | 0       | 0       | 0       | 0       | 0       | 0       | 0        | 0        | 0       | 0        | 0        | 0       | 0       | 0        | 0        | 0         | 0       | 0        |
| Bacilli          | 1              | 3              | 0       | 0       | 0       | 0       | 0       | 0       | 0       | 0        | 0        | 0       | 0        | 0        | 0       | 0       | 0        | 0        | 0         | 0       | 0        |
| Bacillus         | 2              | 237            | 1       | 0       | 0       | 1       | 0       | 1       | 1       | 1        | 0        | 0       | 0        | 1        | 0       | 1       | 1        | 1        | 0         | 1       | 1        |
| Bacteria         | 2              | 86             | 0       | 0       | 0       | 0       | 0       | 0       | 0       | 0        | 0        | 0       | 0        | 0        | 1       | 1       | 0        | 0        | 0         | 1       | 1        |
| Bacteriovorax    | 2              | 98             | 1       | 0       | 0       | 0       | 0       | 1       | 0       | 0        | 0        | 1       | 0        | 0        | 1       | 1       | 0        | 1        | 0         | 1       | 1        |
| Bacteroidales    | 2              | 59             | 0       | 0       | 0       | 1       | 0       | 0       | 1       | 1        | 0        | 0       | 0        | 0        | 0       | 1       | 0        | 0        | 0         | 1       | 0        |
| Bacteroides      | 2              | 96             | 0       | 0       | 0       | 1       | 0       | 0       | 1       | 1        | 0        | 0       | 0        | 0        | 0       | 1       | 1        | 0        | 0         | 1       | 0        |
| Bacteroidetes    | 1              | 2              | 0       | 0       | 0       | 0       | 0       | 0       | 0       | 0        | 0        | 0       | 0        | 0        | 0       | 0       | 0        | 0        | 0         | 0       | 0        |
| Bartonella       | 2              | 50             | 0       | 0       | 0       | 0       | 0       | 0       | 1       | 0        | 0        | 0       | 0        | 0        | 0       | 1       | 0        | 0        | 0         | 1       | 0        |
| Baumannia        | 2              | 24             | 0       | 0       | 0       | 1       | 0       | 0       | 0       | 0        | 0        | 0       | 0        | 0        | 0       | 1       | 0        | 0        | 0         | 1       | 0        |
| Bdellovibrio     | 2              | 87             | 1       | 0       | 0       | 0       | 0       | 1       | 0       | 0        | 0        | 0       | 0        | 0        | 0       | 1       | 0        | 0        | 0         | 1       | 1        |
| Beijerinckia     | 3              | 123            | 0       | 0       | 0       | 1       | 0       | 1       | 1       | 1        | 0        | 0       | 0        | 0        | 1       | 1       | 0        | 0        | 0         | 1       | 1        |
| Belliella        | 1              | 14             | 0       | 0       | 0       | 0       | 0       | 0       | 0       | 0        | 0        | 0       | 0        | 0        | 0       | 0       | 0        | 0        | 0         | 0       | 0        |
| Beutenbergia     | 2              | 82             | 0       | 0       | 0       | 1       | 0       | 1       | 0       | 1        | 0        | 0       | 0        | 0        | 0       | 1       | 0        | 0        | 0         | 0       | 0        |
| Bifidobacterium  | 2              | 61             | 0       | 0       | 0       | 0       | 0       | 1       | 0       | 1        | 0        | 0       | 0        | 0        | 1       | 1       | 0        | 0        | 0         | 0       | 0        |



| Genus                | Cluster Number | Protein Counts | 3.7.1.2 | 3.7.1.9 | 3.8.1.- | 3.8.1.2 | 3.8.1.3 | 3.8.1.5 | 4.1.1.- | 4.1.1.44 | 4.1.1.55 | 4.1.1.7 | 4.1.1.70 | 4.1.1.77 | 4.1.2.- | 4.1.3.- | 4.1.3.39 | 4.1.99.- | 4.1.99.11 | 4.2.1.- | 4.2.1.17 |
|----------------------|----------------|----------------|---------|---------|---------|---------|---------|---------|---------|----------|----------|---------|----------|----------|---------|---------|----------|----------|-----------|---------|----------|
| Bizonia              | 1              | 1              | 0       | 0       | 0       | 0       | 0       | 0       | 0       | 0        | 0        | 0       | 0        | 0        | 0       | 0       | 0        | 0        | 0         | 0       | 0        |
| Blastococcus         | 1              | 39             | 0       | 0       | 0       | 0       | 0       | 0       | 0       | 0        | 0        | 0       | 0        | 0        | 0       | 0       | 0        | 0        | 0         | 0       | 0        |
| Blattabacterium      | 1              | 23             | 0       | 0       | 0       | 0       | 0       | 0       | 0       | 0        | 0        | 0       | 0        | 0        | 0       | 1       | 0        | 0        | 0         | 0       | 0        |
| Blautia              | 1              | 22             | 0       | 0       | 0       | 0       | 0       | 0       | 0       | 1        | 0        | 0       | 0        | 0        | 0       | 0       | 0        | 0        | 0         | 0       | 0        |
| Bordetella           | 3              | 227            | 1       | 1       | 0       | 1       | 0       | 1       | 1       | 1        | 1        | 0       | 0        | 0        | 1       | 1       | 1        | 0        | 0         | 1       | 1        |
| Borrelia             | 1              | 32             | 0       | 0       | 0       | 1       | 0       | 0       | 0       | 0        | 0        | 0       | 0        | 0        | 0       | 0       | 0        | 0        | 0         | 0       | 1        |
| Brachybacterium      | 1              | 18             | 0       | 0       | 0       | 0       | 0       | 0       | 0       | 0        | 0        | 0       | 0        | 0        | 0       | 0       | 0        | 0        | 0         | 0       | 0        |
| Brachymonas          | 1              | 4              | 0       | 0       | 0       | 0       | 0       | 0       | 0       | 0        | 0        | 0       | 0        | 0        | 0       | 0       | 0        | 0        | 0         | 0       | 0        |
| Brachyspira          | 2              | 79             | 0       | 0       | 0       | 0       | 0       | 0       | 0       | 1        | 0        | 0       | 0        | 0        | 0       | 1       | 0        | 0        | 0         | 1       | 0        |
| Bradyrhizobiaceae    | 1              | 20             | 0       | 0       | 0       | 0       | 0       | 0       | 0       | 0        | 0        | 0       | 0        | 0        | 0       | 1       | 0        | 0        | 0         | 0       | 0        |
| Bradyrhizobium       | 3              | 254            | 1       | 0       | 0       | 1       | 0       | 1       | 1       | 1        | 0        | 1       | 0        | 0        | 1       | 1       | 0        | 0        | 0         | 1       | 1        |
| Brenneria            | 1              | 20             | 0       | 0       | 0       | 0       | 0       | 0       | 1       | 0        | 0        | 0       | 0        | 0        | 0       | 1       | 0        | 0        | 0         | 1       | 0        |
| Brevibacillus        | 2              | 122            | 1       | 0       | 0       | 1       | 0       | 0       | 1       | 1        | 0        | 0       | 0        | 1        | 0       | 1       | 0        | 1        | 0         | 1       | 1        |
| Brevibacterium       | 1              | 4              | 0       | 0       | 0       | 0       | 0       | 0       | 0       | 0        | 0        | 0       | 0        | 0        | 0       | 0       | 0        | 0        | 0         | 0       | 0        |
| Brevundimonas        | 2              | 105            | 1       | 0       | 0       | 0       | 0       | 0       | 1       | 0        | 0        | 1       | 0        | 0        | 1       | 1       | 0        | 0        | 0         | 1       | 1        |
| Brucella             | 3              | 138            | 0       | 0       | 0       | 1       | 0       | 1       | 1       | 1        | 0        | 0       | 0        | 0        | 1       | 1       | 0        | 0        | 0         | 1       | 1        |
| Buchnera             | 1              | 26             | 0       | 0       | 0       | 0       | 0       | 0       | 0       | 0        | 0        | 0       | 0        | 0        | 0       | 1       | 0        | 0        | 0         | 1       | 0        |
| Burkholderia         | 3              | 424            | 1       | 1       | 0       | 1       | 1       | 1       | 1       | 1        | 1        | 1       | 0        | 1        | 1       | 1       | 1        | 0        | 0         | 1       | 1        |
| Burkholderiaceae     | 3              | 143            | 1       | 1       | 0       | 1       | 0       | 1       | 1       | 0        | 0        | 0       | 0        | 1        | 0       | 1       | 0        | 0        | 0         | 1       | 1        |
| Burkholderiales      | 1              | 24             | 0       | 0       | 0       | 0       | 0       | 0       | 0       | 0        | 0        | 0       | 0        | 1        | 0       | 0       | 0        | 0        | 0         | 0       | 1        |
| Buttiauxella         | 1              | 2              | 0       | 0       | 0       | 0       | 0       | 0       | 0       | 0        | 0        | 0       | 0        | 0        | 0       | 0       | 0        | 0        | 0         | 0       | 0        |
| Butyrivibrio         | 2              | 67             | 0       | 0       | 0       | 1       | 0       | 0       | 1       | 0        | 0        | 0       | 0        | 0        | 0       | 1       | 0        | 0        | 0         | 1       | 0        |
| Caldanaerobacter     | 2              | 63             | 0       | 0       | 0       | 0       | 0       | 0       | 0       | 1        | 0        | 0       | 0        | 0        | 0       | 1       | 0        | 1        | 0         | 1       | 0        |
| Caldicellulosiruptor | 2              | 75             | 0       | 0       | 1       | 0       | 0       | 0       | 0       | 1        | 0        | 0       | 0        | 0        | 0       | 1       | 0        | 1        | 0         | 1       | 0        |
| Caldilinea           | 1              | 23             | 0       | 0       | 0       | 0       | 0       | 0       | 0       | 0        | 0        | 0       | 0        | 0        | 0       | 0       | 0        | 0        | 0         | 0       | 0        |
| Caldimonas           | 1              | 6              | 0       | 0       | 0       | 0       | 0       | 0       | 0       | 0        | 0        | 0       | 0        | 0        | 0       | 0       | 0        | 0        | 0         | 0       | 0        |
| Caldisericum         | 1              | 10             | 0       | 0       | 0       | 0       | 0       | 0       | 0       | 0        | 0        | 0       | 0        | 0        | 0       | 0       | 0        | 0        | 0         | 0       | 0        |
| Caldisphaera         | 1              | 7              | 0       | 0       | 0       | 0       | 0       | 0       | 0       | 0        | 0        | 0       | 0        | 0        | 0       | 0       | 0        | 0        | 0         | 0       | 0        |
| Calditerrivibrio     | 2              | 74             | 0       | 0       | 0       | 0       | 0       | 0       | 1       | 0        | 0        | 0       | 0        | 0        | 0       | 1       | 0        | 0        | 0         | 1       | 1        |
| Caldivirga           | 1              | 13             | 0       | 0       | 0       | 0       | 0       | 0       | 0       | 0        | 0        | 0       | 0        | 0        | 0       | 0       | 0        | 0        | 0         | 0       | 0        |
| Calothrix            | 1              | 43             | 0       | 0       | 0       | 0       | 0       | 0       | 1       | 0        | 0        | 0       | 0        | 0        | 0       | 1       | 0        | 0        | 0         | 0       | 0        |
| Calyptogena          | 2              | 34             | 0       | 0       | 0       | 0       | 0       | 0       | 0       | 0        | 0        | 0       | 0        | 0        | 0       | 1       | 0        | 0        | 0         | 1       | 0        |
| Campylobacter        | 2              | 80             | 0       | 0       | 0       | 0       | 0       | 0       | 1       | 1        | 0        | 0       | 0        | 0        | 0       | 1       | 1        | 1        | 0         | 1       | 0        |
| Candidatus           | 2              | 290            | 1       | 0       | 0       | 1       | 1       | 1       | 1       | 1        | 0        | 0       | 0        | 0        | 1       | 1       | 0        | 1        | 0         | 1       | 1        |
| Capnocytophaga       | 1              | 50             | 0       | 0       | 0       | 0       | 0       | 0       | 0       | 0        | 0        | 0       | 0        | 0        | 0       | 0       | 0        | 0        | 0         | 1       | 0        |
| Carbophilus          | 1              | 2              | 0       | 0       | 0       | 0       | 0       | 0       | 0       | 0        | 0        | 0       | 0        | 0        | 0       | 0       | 0        | 0        | 0         | 0       | 0        |
| Carboxydibrachium    | 1              | 14             | 0       | 0       | 0       | 0       | 0       | 0       | 0       | 0        | 0        | 0       | 0        | 0        | 0       | 0       | 0        | 0        | 0         | 0       | 0        |
| Carboxydotherrmus    | 2              | 68             | 0       | 0       | 0       | 0       | 0       | 1       | 1       | 1        | 0        | 0       | 0        | 0        | 0       | 1       | 1        | 0        | 0         | 1       | 1        |
| Carica               | 1              | 2              | 0       | 0       | 0       | 0       | 0       | 0       | 0       | 0        | 0        | 0       | 0        | 0        | 0       | 0       | 0        | 0        | 0         | 0       | 0        |
| Carnobacterium       | 2              | 71             | 0       | 0       | 0       | 0       | 0       | 0       | 0       | 0        | 0        | 0       | 0        | 0        | 0       | 0       | 0        | 0        | 0         | 1       | 1        |
| Catenibacterium      | 1              | 2              | 0       | 0       | 0       | 0       | 0       | 0       | 0       | 1        | 0        | 0       | 0        | 0        | 0       | 0       | 0        | 0        | 0         | 0       | 0        |
| Catenovulum          | 1              | 2              | 0       | 0       | 0       | 0       | 0       | 0       | 0       | 0        | 0        | 0       | 0        | 0        | 0       | 0       | 0        | 0        | 0         | 0       | 0        |
| Catenulispora        | 3              | 159            | 1       | 0       | 0       | 1       | 0       | 1       | 1       | 1        | 1        | 0       | 0        | 0        | 1       | 1       | 0        | 0        | 0         | 1       | 1        |
| Caulobacter          | 3              | 168            | 1       | 0       | 0       | 0       | 0       | 0       | 1       | 1        | 0        | 0       | 0        | 0        | 1       | 1       | 0        | 0        | 0         | 1       | 1        |
| Cedecea              | 1              | 45             | 0       | 0       | 0       | 0       | 0       | 0       | 1       | 0        | 0        | 0       | 0        | 0        | 0       | 1       | 0        | 0        | 0         | 1       | 0        |
| Cellulomonas         | 2              | 96             | 1       | 0       | 0       | 1       | 0       | 0       | 0       | 0        | 0        | 0       | 0        | 0        | 1       | 1       | 0        | 0        | 0         | 1       | 1        |
| Cellulophaga         | 2              | 105            | 1       | 0       | 0       | 1       | 0       | 0       | 0       | 1        | 0        | 0       | 0        | 0        | 0       | 1       | 0        | 0        | 0         | 1       | 1        |
| Cellulosilyticum     | 1              | 14             | 0       | 0       | 0       | 0       | 0       | 0       | 0       | 0        | 0        | 0       | 0        | 0        | 0       | 0       | 0        | 0        | 0         | 0       | 0        |
| Cellvibrio           | 2              | 85             | 0       | 0       | 0       | 0       | 0       | 0       | 1       | 0        | 0        | 0       | 0        | 0        | 0       | 1       | 0        | 0        | 0         | 1       | 1        |
| Cenarchaeum          | 1              | 7              | 0       | 0       | 0       | 0       | 0       | 0       | 0       | 0        | 0        | 0       | 0        | 0        | 0       | 0       | 0        | 0        | 0         | 0       | 0        |
| Chamaesiphon         | 1              | 13             | 0       | 0       | 0       | 0       | 0       | 0       | 0       | 0        | 0        | 0       | 0        | 0        | 0       | 0       | 0        | 0        | 0         | 0       | 0        |
| Chelativorans        | 3              | 136            | 1       | 0       | 0       | 1       | 0       | 0       | 1       | 1        | 1        | 0       | 0        | 0        | 1       | 1       | 0        | 0        | 0         | 1       | 1        |

| Genus                  | Cluster Number | Protein Counts | 3.7.1.2 | 3.7.1.9 | 3.8.1.- | 3.8.1.2 | 3.8.1.3 | 3.8.1.5 | 4.1.1.- | 4.1.1.44 | 4.1.1.55 | 4.1.1.7 | 4.1.1.70 | 4.1.1.77 | 4.1.2.- | 4.1.3.- | 4.1.3.39 | 4.1.99.- | 4.1.99.11 | 4.2.1.- | 4.2.1.17 |
|------------------------|----------------|----------------|---------|---------|---------|---------|---------|---------|---------|----------|----------|---------|----------|----------|---------|---------|----------|----------|-----------|---------|----------|
| Chelatococcus          | 1              | 2              | 0       | 0       | 0       | 0       | 0       | 0       | 0       | 0        | 0        | 0       | 0        | 0        | 0       | 0       | 0        | 0        | 0         | 0       | 0        |
| Chitinophaga           | 2              | 98             | 1       | 0       | 0       | 1       | 0       | 0       | 1       | 0        | 0        | 1       | 0        | 0        | 0       | 1       | 0        | 0        | 0         | 1       | 1        |
| Chlamydia              | 1              | 36             | 0       | 0       | 0       | 0       | 0       | 0       | 1       | 0        | 0        | 0       | 0        | 0        | 0       | 0       | 0        | 0        | 0         | 1       | 0        |
| Chlamydomonas          | 1              | 3              | 0       | 0       | 0       | 0       | 0       | 0       | 0       | 0        | 0        | 0       | 0        | 0        | 0       | 0       | 0        | 0        | 0         | 0       | 0        |
| Chlamydophila          | 1              | 31             | 0       | 0       | 0       | 0       | 0       | 0       | 1       | 0        | 0        | 0       | 0        | 0        | 0       | 0       | 0        | 0        | 0         | 1       | 0        |
| Chlorobaculum          | 2              | 61             | 0       | 0       | 0       | 0       | 0       | 1       | 0       | 0        | 0        | 0       | 0        | 0        | 0       | 1       | 0        | 0        | 0         | 1       | 0        |
| Chlorobium             | 2              | 89             | 0       | 0       | 0       | 1       | 0       | 1       | 0       | 0        | 0        | 0       | 0        | 0        | 1       | 1       | 0        | 0        | 0         | 1       | 1        |
| Chlorobium/Pelodictyon | 1              | 2              | 0       | 0       | 0       | 0       | 0       | 0       | 0       | 0        | 0        | 0       | 0        | 0        | 0       | 0       | 0        | 0        | 0         | 1       | 0        |
| Chloroflexus           | 2              | 105            | 1       | 1       | 0       | 1       | 0       | 1       | 0       | 0        | 0        | 0       | 0        | 1        | 1       | 1       | 1        | 0        | 0         | 1       | 1        |
| Chlorogloeopsis        | 1              | 9              | 0       | 0       | 0       | 0       | 0       | 0       | 1       | 0        | 0        | 0       | 0        | 0        | 0       | 0       | 0        | 0        | 0         | 0       | 0        |
| Chloroherpeton         | 2              | 59             | 0       | 0       | 0       | 1       | 0       | 1       | 0       | 0        | 0        | 0       | 0        | 0        | 0       | 1       | 0        | 0        | 0         | 1       | 0        |
| Chromobacterium        | 2              | 117            | 1       | 0       | 0       | 1       | 0       | 1       | 1       | 1        | 0        | 1       | 0        | 0        | 0       | 1       | 0        | 0        | 0         | 1       | 1        |
| Chromohalobacter       | 2              | 145            | 0       | 0       | 0       | 1       | 0       | 0       | 1       | 1        | 0        | 1       | 0        | 0        | 1       | 1       | 0        | 0        | 0         | 1       | 1        |
| Chroococciopsis        | 1              | 24             | 0       | 0       | 0       | 0       | 0       | 0       | 1       | 0        | 0        | 0       | 0        | 0        | 0       | 0       | 0        | 0        | 0         | 0       | 0        |
| Chryseobacterium       | 2              | 104            | 1       | 0       | 0       | 0       | 1       | 1       | 0       | 1        | 0        | 1       | 0        | 0        | 1       | 1       | 0        | 0        | 0         | 0       | 1        |
| Citricella             | 1              | 13             | 0       | 0       | 0       | 0       | 0       | 0       | 0       | 0        | 0        | 0       | 0        | 0        | 0       | 0       | 0        | 0        | 0         | 1       | 0        |
| Citrobacter            | 2              | 190            | 1       | 0       | 0       | 1       | 0       | 0       | 1       | 1        | 0        | 0       | 0        | 0        | 1       | 1       | 1        | 0        | 0         | 1       | 1        |
| Clavibacter            | 2              | 83             | 0       | 1       | 0       | 1       | 0       | 0       | 1       | 1        | 0        | 0       | 0        | 0        | 0       | 1       | 0        | 0        | 0         | 0       | 1        |
| Clonorchis             | 1              | 1              | 0       | 0       | 0       | 0       | 0       | 0       | 0       | 0        | 0        | 0       | 0        | 0        | 0       | 0       | 0        | 0        | 0         | 0       | 0        |
| Clostridiales          | 2              | 77             | 0       | 0       | 0       | 1       | 0       | 0       | 1       | 1        | 0        | 0       | 0        | 0        | 0       | 1       | 0        | 0        | 0         | 0       | 0        |
| Clostridium            | 2              | 191            | 0       | 0       | 0       | 1       | 0       | 1       | 1       | 1        | 0        | 0       | 0        | 0        | 0       | 1       | 0        | 1        | 0         | 1       | 1        |
| Cohnella               | 1              | 2              | 0       | 0       | 0       | 0       | 0       | 0       | 0       | 0        | 0        | 0       | 0        | 0        | 0       | 0       | 0        | 0        | 0         | 0       | 0        |
| Coleofasciculus        | 1              | 4              | 0       | 0       | 0       | 0       | 0       | 0       | 1       | 0        | 0        | 0       | 0        | 0        | 0       | 0       | 0        | 0        | 0         | 0       | 0        |
| Collimonas             | 1              | 35             | 0       | 0       | 0       | 0       | 0       | 0       | 1       | 0        | 0        | 0       | 0        | 0        | 0       | 0       | 0        | 0        | 0         | 0       | 0        |
| Colwellia              | 2              | 130            | 0       | 0       | 0       | 1       | 0       | 0       | 1       | 1        | 0        | 0       | 0        | 0        | 0       | 1       | 0        | 0        | 0         | 1       | 1        |
| Comamonas              | 2              | 196            | 1       | 1       | 0       | 0       | 0       | 1       | 0       | 1        | 1        | 1       | 0        | 1        | 1       | 1       | 1        | 0        | 0         | 1       | 1        |
| Conexibacter           | 3              | 117            | 1       | 1       | 0       | 0       | 0       | 0       | 0       | 0        | 0        | 0       | 0        | 1        | 0       | 1       | 0        | 0        | 0         | 1       | 1        |
| Coprobacillus          | 1              | 2              | 0       | 0       | 0       | 0       | 0       | 0       | 0       | 0        | 0        | 0       | 0        | 0        | 0       | 0       | 0        | 0        | 0         | 0       | 0        |
| Coprococcus            | 2              | 76             | 0       | 0       | 0       | 0       | 0       | 0       | 1       | 1        | 0        | 0       | 0        | 0        | 0       | 1       | 0        | 0        | 0         | 1       | 1        |
| Coprothermobacter      | 2              | 45             | 0       | 0       | 0       | 0       | 0       | 0       | 0       | 1        | 0        | 0       | 0        | 0        | 0       | 0       | 0        | 0        | 0         | 1       | 0        |
| Coralimargarita        | 2              | 68             | 0       | 0       | 0       | 0       | 0       | 0       | 1       | 0        | 0        | 0       | 0        | 1        | 0       | 1       | 0        | 0        | 0         | 1       | 1        |
| Corallococcus          | 1              | 29             | 0       | 0       | 0       | 0       | 0       | 0       | 0       | 0        | 0        | 0       | 0        | 0        | 0       | 0       | 0        | 0        | 0         | 0       | 1        |
| Coriobacterium         | 2              | 36             | 0       | 0       | 0       | 0       | 0       | 0       | 1       | 0        | 0        | 0       | 0        | 0        | 0       | 0       | 0        | 0        | 0         | 0       | 0        |
| Corynebacterineae      | 1              | 5              | 0       | 0       | 0       | 0       | 0       | 0       | 0       | 0        | 0        | 0       | 0        | 0        | 0       | 0       | 0        | 0        | 0         | 0       | 1        |
| Corynebacterium        | 2              | 175            | 0       | 0       | 0       | 1       | 0       | 0       | 1       | 1        | 0        | 0       | 0        | 0        | 1       | 1       | 0        | 0        | 0         | 1       | 1        |
| Coxiella               | 2              | 54             | 0       | 0       | 0       | 0       | 0       | 0       | 0       | 0        | 0        | 0       | 0        | 0        | 0       | 0       | 0        | 0        | 0         | 1       | 1        |
| Crinalium              | 1              | 21             | 0       | 0       | 0       | 0       | 0       | 0       | 1       | 0        | 0        | 0       | 0        | 0        | 0       | 0       | 0        | 0        | 0         | 0       | 0        |
| Croceibacter           | 2              | 80             | 1       | 0       | 0       | 1       | 0       | 1       | 0       | 1        | 0        | 0       | 0        | 0        | 0       | 1       | 0        | 0        | 0         | 1       | 1        |
| Crocospaera            | 1              | 6              | 0       | 0       | 0       | 0       | 0       | 0       | 0       | 0        | 0        | 0       | 0        | 0        | 0       | 0       | 0        | 0        | 0         | 0       | 0        |
| Cronobacter            | 2              | 120            | 0       | 0       | 0       | 1       | 0       | 0       | 1       | 1        | 0        | 0       | 0        | 0        | 0       | 1       | 0        | 0        | 0         | 1       | 1        |
| Cryptobacterium        | 2              | 39             | 0       | 0       | 0       | 0       | 0       | 0       | 0       | 0        | 0        | 0       | 0        | 0        | 0       | 0       | 0        | 0        | 0         | 1       | 0        |
| Cucumis                | 1              | 9              | 0       | 0       | 0       | 0       | 0       | 0       | 0       | 0        | 0        | 0       | 0        | 0        | 0       | 0       | 0        | 0        | 0         | 0       | 0        |
| Cupriavidus            | 3              | 317            | 1       | 1       | 0       | 1       | 1       | 1       | 1       | 1        | 0        | 1       | 0        | 1        | 1       | 1       | 1        | 0        | 0         | 1       | 1        |
| Curtobacterium         | 1              | 5              | 0       | 0       | 0       | 0       | 0       | 0       | 0       | 0        | 0        | 0       | 0        | 0        | 0       | 0       | 0        | 0        | 0         | 0       | 0        |
| Curvibacter            | 1              | 27             | 0       | 0       | 0       | 0       | 0       | 0       | 0       | 0        | 0        | 0       | 0        | 0        | 0       | 1       | 0        | 0        | 0         | 0       | 0        |
| Cyanobacterium         | 1              | 9              | 0       | 0       | 0       | 0       | 0       | 0       | 0       | 0        | 0        | 0       | 0        | 0        | 0       | 0       | 0        | 0        | 0         | 0       | 0        |
| Cyanobium              | 1              | 10             | 0       | 0       | 0       | 0       | 0       | 0       | 0       | 0        | 0        | 0       | 0        | 0        | 0       | 0       | 0        | 0        | 0         | 0       | 0        |
| Cyanothece             | 1              | 34             | 0       | 0       | 0       | 0       | 0       | 0       | 0       | 0        | 0        | 0       | 0        | 0        | 0       | 0       | 0        | 0        | 0         | 0       | 0        |
| Cyclobacterium         | 1              | 19             | 0       | 0       | 0       | 0       | 0       | 0       | 0       | 0        | 0        | 0       | 0        | 0        | 0       | 0       | 0        | 0        | 0         | 0       | 0        |
| Cycloclasticus         | 1              | 21             | 0       | 0       | 0       | 0       | 0       | 0       | 0       | 0        | 0        | 0       | 0        | 0        | 0       | 0       | 0        | 0        | 0         | 0       | 0        |
| Cylindrospermopsis     | 1              | 4              | 0       | 0       | 0       | 0       | 0       | 0       | 1       | 0        | 0        | 0       | 0        | 0        | 0       | 0       | 0        | 0        | 0         | 0       | 0        |
| Cylindrospermum        | 1              | 30             | 0       | 0       | 0       | 0       | 0       | 0       | 1       | 0        | 0        | 0       | 0        | 0        | 0       | 1       | 0        | 0        | 0         | 0       | 0        |

| Genus              | Cluster Number | Protein Counts | 3.7.1.2 | 3.7.1.9 | 3.8.1.- | 3.8.1.2 | 3.8.1.3 | 3.8.1.5 | 4.1.1.- | 4.1.1.44 | 4.1.1.55 | 4.1.1.7 | 4.1.1.70 | 4.1.1.77 | 4.1.2.- | 4.1.3.- | 4.1.3.39 | 4.1.99.- | 4.1.99.11 | 4.2.1.- | 4.2.1.17 |
|--------------------|----------------|----------------|---------|---------|---------|---------|---------|---------|---------|----------|----------|---------|----------|----------|---------|---------|----------|----------|-----------|---------|----------|
| Cytophaga          | 2              | 69             | 0       | 0       | 0       | 1       | 0       | 1       | 0       | 0        | 0        | 0       | 0        | 0        | 0       | 1       | 0        | 0        | 0         | 1       | 1        |
| Dactylococcopsis   | 1              | 8              | 0       | 0       | 0       | 0       | 0       | 0       | 0       | 0        | 0        | 0       | 0        | 0        | 0       | 0       | 0        | 0        | 0         | 0       | 0        |
| Dechloromonas      | 1              | 40             | 0       | 0       | 0       | 0       | 0       | 0       | 0       | 0        | 0        | 0       | 0        | 0        | 0       | 0       | 0        | 0        | 0         | 0       | 0        |
| Dechlorosoma       | 1              | 19             | 0       | 0       | 0       | 0       | 0       | 0       | 0       | 0        | 0        | 0       | 0        | 0        | 0       | 0       | 0        | 0        | 0         | 0       | 0        |
| Deferribacter      | 2              | 73             | 0       | 0       | 0       | 1       | 0       | 0       | 1       | 0        | 0        | 0       | 0        | 0        | 0       | 1       | 0        | 0        | 0         | 1       | 1        |
| Dehalobacter       | 1              | 9              | 0       | 0       | 0       | 0       | 0       | 0       | 0       | 0        | 0        | 0       | 0        | 0        | 0       | 0       | 0        | 0        | 0         | 0       | 0        |
| Dehalococcoides    | 2              | 41             | 0       | 0       | 0       | 1       | 0       | 1       | 0       | 0        | 0        | 0       | 0        | 0        | 0       | 1       | 0        | 0        | 0         | 0       | 0        |
| Dehalogenimonas    | 1              | 37             | 0       | 0       | 0       | 0       | 0       | 0       | 0       | 0        | 0        | 0       | 0        | 0        | 0       | 1       | 0        | 0        | 0         | 1       | 0        |
| Deinococcus        | 2              | 140            | 1       | 0       | 0       | 1       | 1       | 0       | 1       | 1        | 0        | 0       | 0        | 0        | 1       | 1       | 0        | 1        | 0         | 1       | 1        |
| Delftia            | 3              | 177            | 1       | 0       | 0       | 0       | 1       | 1       | 0       | 1        | 0        | 1       | 0        | 1        | 1       | 1       | 1        | 0        | 0         | 1       | 1        |
| Denitrovibrio      | 2              | 67             | 0       | 0       | 0       | 0       | 0       | 0       | 1       | 0        | 0        | 0       | 0        | 0        | 0       | 1       | 0        | 0        | 0         | 1       | 1        |
| Desulfarculus      | 2              | 92             | 0       | 0       | 0       | 0       | 0       | 0       | 1       | 1        | 0        | 0       | 0        | 0        | 0       | 1       | 0        | 0        | 0         | 1       | 1        |
| Desulfatibacillum  | 3              | 84             | 1       | 0       | 0       | 0       | 0       | 0       | 0       | 1        | 0        | 0       | 0        | 0        | 0       | 1       | 0        | 1        | 0         | 1       | 1        |
| Desulfitobacterium | 2              | 102            | 0       | 1       | 0       | 1       | 0       | 0       | 0       | 1        | 0        | 0       | 0        | 0        | 1       | 1       | 1        | 1        | 0         | 1       | 1        |
| Desulfobacca       | 2              | 65             | 0       | 0       | 0       | 0       | 0       | 0       | 1       | 0        | 0        | 0       | 0        | 0        | 0       | 1       | 0        | 0        | 0         | 1       | 1        |
| Desulfobacterium   | 2              | 113            | 0       | 0       | 0       | 1       | 0       | 1       | 1       | 1        | 0        | 0       | 0        | 0        | 0       | 1       | 0        | 1        | 0         | 1       | 1        |
| Desulfobacula      | 1              | 21             | 0       | 0       | 0       | 0       | 0       | 0       | 0       | 0        | 0        | 0       | 0        | 0        | 0       | 0       | 0        | 0        | 0         | 0       | 0        |
| Desulfobulbus      | 2              | 88             | 0       | 0       | 0       | 0       | 0       | 0       | 1       | 0        | 0        | 0       | 0        | 0        | 0       | 1       | 0        | 0        | 0         | 1       | 1        |
| Desulfocapsa       | 1              | 9              | 0       | 0       | 0       | 0       | 0       | 0       | 0       | 0        | 0        | 0       | 0        | 0        | 0       | 0       | 0        | 0        | 0         | 0       | 0        |
| Desulfococcus      | 2              | 80             | 0       | 0       | 0       | 0       | 0       | 0       | 1       | 0        | 0        | 0       | 0        | 0        | 0       | 1       | 0        | 1        | 0         | 1       | 1        |
| Desulfohalobium    | 2              | 52             | 0       | 0       | 0       | 0       | 0       | 0       | 0       | 0        | 0        | 0       | 0        | 0        | 0       | 1       | 0        | 1        | 0         | 1       | 0        |
| Desulfomicrobium   | 2              | 65             | 0       | 0       | 0       | 0       | 0       | 0       | 0       | 0        | 0        | 0       | 0        | 0        | 0       | 1       | 0        | 1        | 0         | 1       | 0        |
| Desulfomonile      | 1              | 25             | 0       | 0       | 0       | 0       | 0       | 0       | 0       | 0        | 0        | 0       | 0        | 0        | 0       | 0       | 0        | 0        | 0         | 0       | 0        |
| Desulforhabdus     | 1              | 2              | 0       | 0       | 0       | 0       | 0       | 0       | 0       | 0        | 0        | 0       | 0        | 0        | 0       | 0       | 0        | 0        | 0         | 0       | 0        |
| Desulfosporosinus  | 1              | 30             | 0       | 0       | 0       | 0       | 0       | 0       | 0       | 0        | 0        | 0       | 0        | 0        | 0       | 0       | 0        | 0        | 0         | 0       | 0        |
| Desulfotalea       | 2              | 66             | 0       | 0       | 0       | 0       | 0       | 0       | 1       | 0        | 0        | 0       | 0        | 0        | 0       | 1       | 0        | 1        | 0         | 1       | 0        |
| Desulfotomaculum   | 2              | 98             | 0       | 0       | 0       | 0       | 0       | 0       | 1       | 0        | 0        | 0       | 0        | 0        | 0       | 1       | 0        | 1        | 0         | 1       | 1        |
| Desulfovibrio      | 2              | 144            | 0       | 0       | 0       | 1       | 0       | 1       | 1       | 1        | 0        | 1       | 0        | 0        | 1       | 1       | 0        | 1        | 0         | 1       | 1        |
| Desulfurispirillum | 2              | 78             | 0       | 0       | 0       | 0       | 0       | 0       | 1       | 0        | 0        | 0       | 0        | 0        | 0       | 1       | 0        | 0        | 0         | 1       | 1        |
| Desulfurivibrio    | 2              | 71             | 0       | 0       | 0       | 0       | 0       | 0       | 1       | 0        | 0        | 0       | 0        | 0        | 0       | 1       | 0        | 0        | 0         | 1       | 0        |
| Desulfurobacterium | 2              | 53             | 0       | 0       | 0       | 0       | 0       | 0       | 1       | 0        | 0        | 0       | 0        | 0        | 0       | 1       | 0        | 0        | 0         | 1       | 0        |
| Desulfurococcus    | 1              | 11             | 0       | 0       | 0       | 0       | 0       | 0       | 0       | 0        | 0        | 0       | 0        | 0        | 0       | 0       | 0        | 0        | 0         | 0       | 0        |
| Diaphorobacter     | 1              | 16             | 0       | 0       | 0       | 0       | 0       | 0       | 0       | 0        | 0        | 0       | 0        | 1        | 0       | 0       | 1        | 0        | 0         | 0       | 0        |
| Dichelobacter      | 2              | 45             | 0       | 0       | 0       | 0       | 0       | 0       | 0       | 0        | 0        | 0       | 0        | 0        | 0       | 0       | 0        | 0        | 0         | 1       | 1        |
| Dickeya            | 2              | 155            | 0       | 0       | 0       | 1       | 0       | 0       | 1       | 1        | 1        | 0       | 0        | 0        | 1       | 1       | 0        | 0        | 0         | 1       | 1        |
| Dictyoglomus       | 2              | 62             | 0       | 0       | 0       | 1       | 0       | 0       | 0       | 0        | 0        | 0       | 0        | 0        | 0       | 1       | 0        | 1        | 0         | 1       | 0        |
| Dinoroseobacter    | 3              | 148            | 1       | 0       | 0       | 1       | 0       | 1       | 1       | 1        | 1        | 0       | 0        | 1        | 1       | 1       | 0        | 0        | 0         | 1       | 1        |
| Dokdonia           | 1              | 3              | 0       | 0       | 0       | 0       | 0       | 0       | 0       | 1        | 0        | 0       | 0        | 0        | 0       | 0       | 0        | 0        | 0         | 0       | 0        |
| Dorea              | 1              | 7              | 0       | 0       | 0       | 0       | 0       | 0       | 0       | 1        | 0        | 0       | 0        | 0        | 0       | 0       | 0        | 0        | 0         | 0       | 0        |
| Dyadobacter        | 2              | 83             | 1       | 0       | 0       | 0       | 0       | 0       | 1       | 0        | 0        | 0       | 0        | 0        | 1       | 1       | 0        | 0        | 0         | 1       | 1        |
| Echinicola         | 1              | 20             | 0       | 0       | 0       | 0       | 0       | 0       | 0       | 0        | 0        | 0       | 0        | 0        | 0       | 0       | 0        | 0        | 0         | 0       | 0        |
| Edwardsiella       | 2              | 126            | 0       | 0       | 0       | 1       | 0       | 0       | 1       | 0        | 0        | 0       | 0        | 0        | 0       | 1       | 0        | 0        | 0         | 1       | 0        |
| Eggerthella        | 1              | 51             | 0       | 0       | 0       | 0       | 0       | 0       | 0       | 1        | 0        | 0       | 0        | 0        | 0       | 1       | 0        | 0        | 0         | 1       | 1        |
| Ehrlichia          | 2              | 37             | 0       | 0       | 0       | 0       | 0       | 0       | 0       | 0        | 0        | 0       | 0        | 0        | 0       | 0       | 0        | 0        | 0         | 1       | 1        |
| Eikenella          | 1              | 4              | 0       | 0       | 0       | 0       | 0       | 0       | 1       | 0        | 0        | 0       | 0        | 0        | 0       | 0       | 0        | 0        | 0         | 0       | 0        |
| Elusimicrobium     | 2              | 44             | 0       | 0       | 0       | 0       | 0       | 0       | 0       | 0        | 0        | 0       | 0        | 0        | 0       | 1       | 0        | 1        | 0         | 1       | 0        |
| Emticicia          | 1              | 21             | 0       | 0       | 0       | 0       | 0       | 0       | 0       | 0        | 0        | 0       | 0        | 0        | 0       | 0       | 0        | 0        | 0         | 0       | 0        |
| Enhydrobacter      | 1              | 1              | 0       | 0       | 0       | 0       | 0       | 0       | 0       | 0        | 0        | 0       | 0        | 0        | 0       | 0       | 0        | 0        | 0         | 0       | 0        |
| Ensifer            | 1              | 2              | 0       | 0       | 0       | 0       | 0       | 0       | 0       | 0        | 0        | 0       | 0        | 0        | 0       | 0       | 0        | 0        | 0         | 0       | 0        |
| Enterobacter       | 2              | 202            | 1       | 0       | 0       | 1       | 0       | 0       | 1       | 1        | 0        | 0       | 0        | 0        | 1       | 1       | 0        | 0        | 0         | 1       | 1        |
| Enterobacteriaceae | 2              | 211            | 1       | 0       | 0       | 1       | 0       | 0       | 1       | 1        | 0        | 0       | 0        | 0        | 1       | 1       | 1        | 0        | 0         | 1       | 1        |
| Enterococcus       | 1              | 187            | 0       | 0       | 0       | 1       | 0       | 0       | 1       | 1        | 0        | 0       | 0        | 0        | 0       | 1       | 0        | 0        | 0         | 1       | 1        |

| Genus               | Cluster Number | Protein Counts | 3.7.1.2 | 3.7.1.9 | 3.8.1.- | 3.8.1.2 | 3.8.1.3 | 3.8.1.5 | 4.1.1.- | 4.1.1.44 | 4.1.1.55 | 4.1.1.7 | 4.1.1.70 | 4.1.1.77 | 4.1.2.- | 4.1.3.- | 4.1.3.39 | 4.1.99.- | 4.1.99.11 | 4.2.1.- | 4.2.1.17 |
|---------------------|----------------|----------------|---------|---------|---------|---------|---------|---------|---------|----------|----------|---------|----------|----------|---------|---------|----------|----------|-----------|---------|----------|
| Enterovibrio        | 1              | 15             | 0       | 0       | 0       | 0       | 0       | 0       | 0       | 0        | 0        | 0       | 0        | 0        | 0       | 1       | 0        | 0        | 0         | 1       | 0        |
| Erwinia             | 2              | 151            | 0       | 0       | 0       | 1       | 0       | 1       | 1       | 1        | 1        | 0       | 0        | 0        | 0       | 1       | 0        | 0        | 0         | 1       | 1        |
| Erysipelothrix      | 1              | 9              | 0       | 0       | 0       | 0       | 0       | 0       | 0       | 0        | 0        | 0       | 0        | 0        | 0       | 0       | 0        | 0        | 0         | 0       | 0        |
| Erysipelotrichaceae | 1              | 4              | 0       | 0       | 0       | 0       | 0       | 0       | 0       | 0        | 0        | 0       | 0        | 0        | 0       | 0       | 0        | 0        | 0         | 0       | 0        |
| Erythrobacter       | 2              | 80             | 0       | 0       | 0       | 0       | 0       | 1       | 0       | 0        | 0        | 0       | 0        | 0        | 0       | 1       | 0        | 0        | 0         | 1       | 1        |
| Escherichia         | 2              | 242            | 1       | 0       | 0       | 1       | 0       | 0       | 1       | 1        | 0        | 0       | 0        | 0        | 1       | 1       | 1        | 0        | 0         | 1       | 1        |
| Ethanoligenens      | 2              | 69             | 0       | 0       | 0       | 1       | 0       | 0       | 1       | 1        | 0        | 0       | 0        | 0        | 0       | 1       | 0        | 1        | 0         | 1       | 0        |
| Eubacteriaceae      | 1              | 2              | 0       | 0       | 0       | 0       | 0       | 0       | 0       | 0        | 0        | 0       | 0        | 0        | 0       | 0       | 0        | 0        | 0         | 0       | 0        |
| Eubacterium         | 2              | 103            | 0       | 0       | 0       | 0       | 0       | 1       | 1       | 1        | 0        | 0       | 0        | 0        | 0       | 1       | 0        | 1        | 0         | 1       | 0        |
| Eudoraea            | 1              | 4              | 0       | 0       | 0       | 0       | 0       | 0       | 0       | 0        | 0        | 0       | 0        | 0        | 0       | 0       | 0        | 0        | 0         | 0       | 0        |
| Euryarchaeota       | 1              | 1              | 0       | 0       | 0       | 0       | 0       | 0       | 0       | 0        | 0        | 0       | 0        | 0        | 0       | 0       | 0        | 0        | 0         | 0       | 0        |
| Exiguobacterium     | 2              | 93             | 0       | 0       | 0       | 1       | 0       | 1       | 0       | 1        | 0        | 0       | 0        | 0        | 0       | 1       | 0        | 0        | 0         | 1       | 1        |
| Faecalibacterium    | 1              | 12             | 0       | 0       | 0       | 0       | 0       | 0       | 0       | 0        | 0        | 0       | 0        | 0        | 0       | 0       | 0        | 0        | 0         | 0       | 0        |
| Ferrimonas          | 2              | 115            | 1       | 0       | 0       | 1       | 0       | 1       | 1       | 0        | 0        | 0       | 0        | 0        | 0       | 1       | 0        | 0        | 0         | 1       | 1        |
| Ferroglobus         | 1              | 14             | 0       | 0       | 0       | 0       | 0       | 0       | 0       | 0        | 0        | 0       | 0        | 0        | 0       | 0       | 0        | 0        | 0         | 0       | 0        |
| Ferroplasma         | 1              | 11             | 0       | 0       | 0       | 0       | 0       | 0       | 0       | 0        | 0        | 0       | 0        | 0        | 0       | 0       | 0        | 0        | 0         | 0       | 0        |
| Fervidicoccus       | 1              | 7              | 0       | 0       | 0       | 0       | 0       | 0       | 0       | 0        | 0        | 0       | 0        | 0        | 0       | 0       | 0        | 0        | 0         | 0       | 0        |
| Fervidobacterium    | 2              | 54             | 0       | 0       | 0       | 0       | 0       | 1       | 0       | 0        | 0        | 0       | 0        | 0        | 0       | 0       | 0        | 0        | 0         | 1       | 0        |
| Fibrella            | 1              | 17             | 0       | 0       | 0       | 0       | 0       | 0       | 0       | 0        | 0        | 0       | 0        | 0        | 0       | 0       | 0        | 0        | 0         | 0       | 0        |
| Fibrobacter         | 2              | 52             | 0       | 0       | 0       | 0       | 0       | 0       | 1       | 1        | 0        | 0       | 0        | 0        | 0       | 1       | 0        | 0        | 0         | 1       | 0        |
| Filifactor          | 1              | 9              | 0       | 0       | 0       | 0       | 0       | 0       | 0       | 0        | 0        | 0       | 0        | 0        | 0       | 0       | 0        | 0        | 0         | 0       | 0        |
| Finegoldia          | 2              | 55             | 0       | 0       | 0       | 0       | 0       | 0       | 0       | 1        | 0        | 0       | 0        | 0        | 0       | 0       | 0        | 0        | 0         | 1       | 0        |
| Firmicutes          | 1              | 15             | 0       | 0       | 0       | 0       | 0       | 0       | 0       | 1        | 0        | 0       | 0        | 0        | 0       | 0       | 0        | 0        | 0         | 0       | 0        |
| Fischerella         | 1              | 15             | 0       | 0       | 0       | 0       | 0       | 0       | 1       | 0        | 0        | 0       | 0        | 0        | 0       | 0       | 0        | 0        | 0         | 0       | 0        |
| Flavobacteria       | 1              | 7              | 0       | 0       | 0       | 0       | 0       | 0       | 0       | 1        | 0        | 0       | 0        | 0        | 0       | 0       | 0        | 0        | 0         | 0       | 0        |
| Flavobacteriaceae   | 2              | 69             | 1       | 0       | 0       | 1       | 0       | 0       | 0       | 0        | 0        | 0       | 0        | 0        | 0       | 1       | 0        | 0        | 0         | 1       | 1        |
| Flavobacteriales    | 1              | 3              | 0       | 0       | 0       | 0       | 0       | 0       | 0       | 1        | 0        | 0       | 0        | 0        | 0       | 0       | 0        | 0        | 0         | 0       | 0        |
| Flavobacterium      | 2              | 103            | 1       | 0       | 0       | 1       | 0       | 1       | 1       | 0        | 0        | 0       | 0        | 0        | 0       | 1       | 0        | 0        | 0         | 1       | 1        |
| Flexibacter         | 1              | 17             | 0       | 0       | 0       | 0       | 0       | 0       | 0       | 0        | 0        | 0       | 0        | 0        | 0       | 0       | 0        | 0        | 0         | 0       | 0        |
| Flexistipes         | 1              | 11             | 0       | 0       | 0       | 0       | 0       | 0       | 0       | 0        | 0        | 0       | 0        | 0        | 0       | 0       | 0        | 0        | 0         | 0       | 0        |
| Fluoribacter        | 1              | 6              | 0       | 0       | 0       | 0       | 0       | 0       | 1       | 0        | 0        | 0       | 0        | 0        | 0       | 0       | 0        | 0        | 0         | 0       | 0        |
| Fluviicola          | 2              | 69             | 1       | 0       | 0       | 0       | 0       | 0       | 0       | 0        | 0        | 0       | 0        | 0        | 0       | 1       | 0        | 0        | 0         | 1       | 1        |
| Formosa             | 1              | 2              | 0       | 0       | 0       | 0       | 0       | 0       | 0       | 0        | 0        | 0       | 0        | 0        | 0       | 0       | 0        | 0        | 0         | 0       | 0        |
| Francisella         | 2              | 88             | 0       | 0       | 0       | 0       | 0       | 0       | 1       | 0        | 0        | 0       | 0        | 0        | 0       | 1       | 0        | 0        | 0         | 1       | 1        |
| Frankia             | 3              | 202            | 1       | 1       | 0       | 1       | 0       | 0       | 1       | 1        | 0        | 0       | 0        | 1        | 1       | 1       | 1        | 0        | 0         | 1       | 1        |
| Frateuria           | 1              | 25             | 0       | 0       | 0       | 0       | 0       | 0       | 0       | 0        | 0        | 0       | 0        | 0        | 0       | 0       | 0        | 0        | 0         | 0       | 0        |
| Fructobacillus      | 1              | 2              | 0       | 0       | 0       | 0       | 0       | 0       | 0       | 0        | 0        | 0       | 0        | 0        | 0       | 0       | 0        | 0        | 0         | 1       | 0        |
| Fulvimarina         | 1              | 2              | 0       | 0       | 0       | 0       | 0       | 0       | 0       | 0        | 0        | 0       | 0        | 0        | 0       | 0       | 0        | 0        | 0         | 0       | 0        |
| Fusobacterium       | 1              | 48             | 0       | 0       | 0       | 0       | 0       | 1       | 0       | 0        | 0        | 0       | 1        | 0        | 0       | 0       | 0        | 1        | 0         | 1       | 1        |
| Gallibacterium      | 2              | 87             | 1       | 0       | 0       | 1       | 0       | 0       | 1       | 1        | 0        | 0       | 0        | 0        | 0       | 1       | 0        | 0        | 0         | 1       | 0        |
| Gallionella         | 2              | 67             | 0       | 0       | 0       | 0       | 0       | 0       | 1       | 0        | 0        | 0       | 0        | 0        | 0       | 1       | 0        | 0        | 0         | 1       | 1        |
| Gammaproteobacteria | 1              | 9              | 0       | 0       | 0       | 0       | 0       | 0       | 0       | 0        | 0        | 0       | 0        | 0        | 0       | 0       | 0        | 0        | 0         | 0       | 0        |
| Gardnerella         | 1              | 31             | 0       | 0       | 0       | 0       | 0       | 0       | 0       | 0        | 0        | 0       | 0        | 0        | 0       | 0       | 0        | 0        | 0         | 1       | 0        |
| Geitlerinema        | 1              | 9              | 0       | 0       | 0       | 0       | 0       | 0       | 0       | 0        | 0        | 0       | 0        | 0        | 0       | 0       | 0        | 0        | 0         | 0       | 0        |
| Gemmatimonas        | 2              | 93             | 1       | 0       | 0       | 0       | 0       | 1       | 1       | 0        | 0        | 0       | 0        | 0        | 1       | 1       | 0        | 0        | 0         | 0       | 1        |
| Geobacillus         | 2              | 168            | 0       | 1       | 0       | 1       | 0       | 0       | 1       | 1        | 0        | 0       | 0        | 1        | 1       | 1       | 0        | 1        | 0         | 1       | 1        |
| Geobacter           | 2              | 150            | 0       | 0       | 0       | 1       | 0       | 1       | 1       | 1        | 0        | 0       | 0        | 0        | 0       | 1       | 0        | 0        | 1         | 1       | 1        |
| Geodermatophilus    | 2              | 136            | 1       | 0       | 0       | 1       | 0       | 0       | 0       | 1        | 0        | 0       | 0        | 0        | 0       | 1       | 0        | 1        | 0         | 0       | 1        |
| Geopsychrobacter    | 1              | 2              | 0       | 0       | 0       | 0       | 0       | 0       | 0       | 0        | 0        | 0       | 0        | 0        | 0       | 0       | 0        | 0        | 0         | 0       | 0        |
| Gillisia            | 1              | 11             | 0       | 0       | 0       | 0       | 0       | 0       | 0       | 1        | 0        | 0       | 0        | 0        | 0       | 0       | 0        | 0        | 0         | 0       | 0        |
| Gilvimarinus        | 1              | 4              | 0       | 0       | 0       | 0       | 0       | 0       | 0       | 0        | 0        | 0       | 0        | 0        | 0       | 0       | 0        | 0        | 0         | 0       | 0        |
| Glaciecola          | 2              | 117            | 0       | 1       | 0       | 1       | 0       | 0       | 1       | 1        | 0        | 0       | 0        | 0        | 0       | 1       | 0        | 0        | 0         | 1       | 1        |

| Genus             | Cluster Number | Protein Counts | 3.7.1.2 | 3.7.1.9 | 3.8.1.- | 3.8.1.2 | 3.8.1.3 | 3.8.1.5 | 4.1.1.- | 4.1.1.44 | 4.1.1.55 | 4.1.1.7 | 4.1.1.70 | 4.1.1.77 | 4.1.2.- | 4.1.3.- | 4.1.3.39 | 4.1.99.- | 4.1.99.11 | 4.2.1.- | 4.2.1.17 |
|-------------------|----------------|----------------|---------|---------|---------|---------|---------|---------|---------|----------|----------|---------|----------|----------|---------|---------|----------|----------|-----------|---------|----------|
| Gloeobacter       | 2              | 67             | 0       | 0       | 0       | 0       | 0       | 0       | 1       | 0        | 0        | 0       | 0        | 0        | 0       | 1       | 0        | 0        | 0         | 1       | 1        |
| Gloeocapsa        | 1              | 20             | 0       | 0       | 0       | 0       | 0       | 0       | 1       | 0        | 0        | 0       | 0        | 0        | 0       | 0       | 0        | 0        | 0         | 0       | 0        |
| Gloeotheca        | 1              | 1              | 0       | 0       | 0       | 0       | 0       | 0       | 0       | 0        | 0        | 0       | 0        | 0        | 0       | 0       | 0        | 0        | 0         | 0       | 0        |
| Gluconacetobacter | 2              | 96             | 0       | 0       | 0       | 0       | 0       | 0       | 1       | 1        | 0        | 0       | 0        | 0        | 0       | 1       | 0        | 0        | 0         | 1       | 1        |
| Gluconobacter     | 2              | 76             | 0       | 0       | 0       | 0       | 0       | 0       | 1       | 0        | 0        | 0       | 0        | 0        | 0       | 1       | 0        | 0        | 0         | 1       | 0        |
| Gordonia          | 1              | 158            | 0       | 1       | 0       | 0       | 0       | 0       | 0       | 1        | 0        | 0       | 0        | 1        | 0       | 1       | 1        | 0        | 0         | 1       | 1        |
| Gordonibacter     | 1              | 32             | 0       | 0       | 0       | 1       | 0       | 0       | 0       | 1        | 0        | 0       | 0        | 0        | 0       | 0       | 0        | 0        | 0         | 0       | 0        |
| Gramella          | 2              | 104            | 1       | 0       | 0       | 1       | 0       | 0       | 1       | 1        | 0        | 0       | 0        | 1        | 0       | 1       | 0        | 0        | 0         | 1       | 1        |
| Granulibacter     | 2              | 90             | 0       | 0       | 0       | 0       | 0       | 0       | 0       | 1        | 0        | 0       | 0        | 0        | 0       | 1       | 0        | 0        | 0         | 1       | 0        |
| Granulicella      | 2              | 98             | 0       | 0       | 0       | 0       | 0       | 0       | 1       | 1        | 1        | 0       | 0        | 0        | 0       | 1       | 0        | 0        | 0         | 1       | 1        |
| Grimontia         | 1              | 9              | 0       | 0       | 0       | 0       | 0       | 0       | 0       | 0        | 0        | 0       | 0        | 0        | 0       | 1       | 0        | 0        | 0         | 0       | 0        |
| Haemophilus       | 2              | 117            | 0       | 0       | 0       | 1       | 0       | 0       | 1       | 1        | 0        | 0       | 0        | 0        | 0       | 1       | 0        | 0        | 0         | 1       | 0        |
| Hafnia            | 1              | 29             | 0       | 0       | 0       | 0       | 0       | 0       | 1       | 0        | 0        | 0       | 0        | 0        | 0       | 1       | 0        | 0        | 0         | 0       | 0        |
| Hahella           | 3              | 130            | 1       | 0       | 0       | 0       | 0       | 1       | 1       | 0        | 0        | 0       | 0        | 0        | 0       | 1       | 0        | 0        | 0         | 1       | 1        |
| Halalkalicoccus   | 1              | 18             | 0       | 0       | 0       | 0       | 0       | 0       | 0       | 0        | 0        | 0       | 0        | 0        | 0       | 0       | 0        | 0        | 0         | 0       | 0        |
| Halanaerobium     | 2              | 89             | 0       | 0       | 0       | 0       | 0       | 0       | 0       | 0        | 0        | 0       | 0        | 0        | 0       | 1       | 0        | 0        | 0         | 1       | 1        |
| Haliangium        | 2              | 108            | 1       | 0       | 0       | 0       | 0       | 1       | 0       | 0        | 0        | 0       | 0        | 0        | 0       | 1       | 1        | 0        | 0         | 1       | 1        |
| Haliscomenobacter | 2              | 107            | 1       | 0       | 0       | 0       | 0       | 0       | 1       | 0        | 0        | 0       | 0        | 0        | 1       | 1       | 0        | 0        | 0         | 0       | 1        |
| Haloarcula        | 1              | 22             | 0       | 0       | 0       | 0       | 0       | 0       | 0       | 0        | 0        | 0       | 0        | 0        | 0       | 0       | 0        | 0        | 0         | 0       | 0        |
| Halobacillus      | 1              | 19             | 0       | 0       | 0       | 0       | 0       | 0       | 0       | 0        | 0        | 0       | 0        | 0        | 0       | 0       | 0        | 0        | 0         | 0       | 0        |
| Halobacteriaceae  | 1              | 1              | 0       | 0       | 0       | 0       | 0       | 0       | 0       | 0        | 0        | 0       | 0        | 0        | 0       | 0       | 0        | 0        | 0         | 0       | 0        |
| Halobacterium     | 1              | 10             | 0       | 0       | 0       | 0       | 0       | 0       | 0       | 0        | 0        | 0       | 0        | 0        | 0       | 0       | 0        | 0        | 0         | 0       | 0        |
| Halobacteroides   | 1              | 14             | 0       | 0       | 0       | 0       | 0       | 0       | 0       | 0        | 0        | 0       | 0        | 0        | 0       | 0       | 0        | 0        | 0         | 0       | 0        |
| Haloferax         | 1              | 20             | 0       | 0       | 0       | 0       | 0       | 0       | 0       | 0        | 0        | 0       | 0        | 0        | 0       | 0       | 0        | 0        | 0         | 0       | 0        |
| Halogeometricum   | 1              | 12             | 0       | 0       | 0       | 0       | 0       | 0       | 0       | 0        | 0        | 0       | 0        | 0        | 0       | 0       | 0        | 0        | 0         | 0       | 0        |
| Halomicrobium     | 1              | 10             | 0       | 0       | 0       | 0       | 0       | 0       | 0       | 0        | 0        | 0       | 0        | 0        | 0       | 0       | 0        | 0        | 0         | 0       | 0        |
| Halomonas         | 1              | 149            | 0       | 0       | 0       | 1       | 0       | 0       | 1       | 1        | 0        | 1       | 0        | 0        | 1       | 1       | 0        | 0        | 0         | 1       | 1        |
| Halopiger         | 1              | 16             | 0       | 0       | 0       | 0       | 0       | 0       | 0       | 0        | 0        | 0       | 0        | 0        | 0       | 0       | 0        | 0        | 0         | 0       | 0        |
| Haloquadratum     | 1              | 19             | 0       | 0       | 0       | 0       | 0       | 0       | 0       | 0        | 0        | 0       | 0        | 0        | 0       | 0       | 0        | 0        | 0         | 0       | 0        |
| Halorhabdus       | 1              | 10             | 0       | 0       | 0       | 0       | 0       | 0       | 0       | 0        | 0        | 0       | 0        | 0        | 0       | 0       | 0        | 0        | 0         | 0       | 0        |
| Halorhodospira    | 2              | 71             | 0       | 0       | 0       | 1       | 0       | 0       | 1       | 0        | 0        | 0       | 0        | 0        | 0       | 1       | 0        | 0        | 0         | 1       | 0        |
| Halorubrum        | 1              | 16             | 0       | 0       | 0       | 0       | 0       | 0       | 0       | 0        | 0        | 0       | 0        | 0        | 0       | 0       | 0        | 0        | 0         | 0       | 0        |
| Haloterrigena     | 1              | 19             | 0       | 0       | 0       | 0       | 0       | 0       | 0       | 0        | 0        | 0       | 0        | 0        | 0       | 0       | 0        | 0        | 0         | 0       | 0        |
| Halothece         | 1              | 9              | 0       | 0       | 0       | 0       | 0       | 0       | 0       | 0        | 0        | 0       | 0        | 0        | 0       | 0       | 0        | 0        | 0         | 0       | 0        |
| Halothermothrix   | 2              | 50             | 0       | 0       | 0       | 0       | 0       | 0       | 0       | 0        | 0        | 0       | 0        | 0        | 0       | 1       | 0        | 1        | 0         | 1       | 0        |
| Halothiobacillus  | 2              | 65             | 0       | 0       | 0       | 0       | 0       | 0       | 0       | 1        | 0        | 0       | 0        | 0        | 0       | 1       | 0        | 0        | 0         | 1       | 0        |
| Halovivax         | 1              | 12             | 0       | 0       | 0       | 0       | 0       | 0       | 0       | 0        | 0        | 0       | 0        | 0        | 0       | 0       | 0        | 0        | 0         | 0       | 0        |
| Helicobacter      | 2              | 79             | 0       | 0       | 0       | 0       | 0       | 0       | 1       | 1        | 0        | 0       | 0        | 0        | 0       | 1       | 0        | 0        | 0         | 1       | 0        |
| Heliobacillus     | 1              | 4              | 0       | 0       | 0       | 0       | 0       | 0       | 0       | 0        | 0        | 0       | 0        | 0        | 0       | 1       | 0        | 0        | 0         | 0       | 0        |
| Heliobacterium    | 2              | 51             | 0       | 0       | 0       | 0       | 0       | 0       | 0       | 0        | 0        | 0       | 0        | 0        | 0       | 1       | 0        | 1        | 0         | 1       | 0        |
| Herbaspirillum    | 2              | 172            | 1       | 1       | 0       | 1       | 0       | 1       | 1       | 0        | 0        | 1       | 0        | 1        | 0       | 1       | 0        | 0        | 0         | 1       | 1        |
| Herminiimonas     | 3              | 89             | 1       | 0       | 0       | 1       | 1       | 1       | 1       | 0        | 1        | 0       | 0        | 0        | 0       | 1       | 0        | 0        | 0         | 1       | 1        |
| Herpetosiphon     | 3              | 90             | 1       | 0       | 0       | 0       | 0       | 0       | 1       | 0        | 0        | 0       | 0        | 0        | 0       | 1       | 0        | 0        | 0         | 1       | 1        |
| Hippea            | 2              | 44             | 0       | 0       | 0       | 0       | 0       | 0       | 1       | 0        | 0        | 0       | 0        | 0        | 0       | 1       | 0        | 0        | 0         | 1       | 1        |
| Hirschia          | 2              | 102            | 0       | 0       | 0       | 1       | 0       | 0       | 1       | 1        | 1        | 0       | 0        | 0        | 1       | 1       | 0        | 0        | 0         | 1       | 1        |
| Histophilus       | 2              | 72             | 0       | 0       | 0       | 0       | 0       | 0       | 1       | 1        | 0        | 0       | 0        | 0        | 0       | 0       | 0        | 0        | 0         | 1       | 0        |
| Hoeflea           | 1              | 16             | 0       | 0       | 0       | 0       | 0       | 0       | 0       | 0        | 0        | 0       | 0        | 0        | 0       | 1       | 0        | 0        | 0         | 0       | 0        |
| Hydrogenivirga    | 1              | 2              | 0       | 0       | 0       | 0       | 0       | 0       | 0       | 0        | 0        | 0       | 0        | 0        | 0       | 0       | 0        | 0        | 0         | 0       | 0        |
| Hydrogenobacter   | 2              | 55             | 0       | 0       | 0       | 0       | 0       | 0       | 1       | 0        | 0        | 0       | 0        | 0        | 0       | 1       | 0        | 0        | 0         | 1       | 0        |
| Hydrogenobaculum  | 2              | 44             | 0       | 0       | 0       | 0       | 0       | 0       | 0       | 0        | 0        | 0       | 0        | 0        | 0       | 1       | 0        | 0        | 0         | 1       | 0        |
| Hydrogenophaga    | 1              | 9              | 0       | 0       | 0       | 0       | 0       | 0       | 0       | 0        | 0        | 0       | 0        | 0        | 0       | 0       | 0        | 0        | 0         | 0       | 0        |
| Hylemonella       | 1              | 4              | 0       | 0       | 0       | 0       | 0       | 0       | 0       | 0        | 0        | 0       | 0        | 0        | 0       | 0       | 0        | 0        | 0         | 0       | 0        |

| Genus                 | Cluster Number | Protein Counts | 3.7.1.2 | 3.7.1.9 | 3.8.1.- | 3.8.1.2 | 3.8.1.3 | 3.8.1.5 | 4.1.1.- | 4.1.1.44 | 4.1.1.55 | 4.1.1.7 | 4.1.1.70 | 4.1.1.77 | 4.1.2.- | 4.1.3.- | 4.1.3.39 | 4.1.99.- | 4.1.99.11 | 4.2.1.- | 4.2.1.17 |
|-----------------------|----------------|----------------|---------|---------|---------|---------|---------|---------|---------|----------|----------|---------|----------|----------|---------|---------|----------|----------|-----------|---------|----------|
| Hyperthermus          | 1              | 6              | 0       | 0       | 0       | 0       | 0       | 0       | 0       | 0        | 0        | 0       | 0        | 0        | 0       | 0       | 0        | 0        | 0         | 0       | 0        |
| Hyphomicrobium        | 2              | 93             | 0       | 0       | 0       | 0       | 0       | 0       | 1       | 0        | 0        | 0       | 0        | 0        | 0       | 1       | 0        | 0        | 0         | 1       | 1        |
| Hyphomonas            | 3              | 105            | 1       | 0       | 0       | 0       | 0       | 1       | 1       | 1        | 0        | 0       | 0        | 0        | 0       | 1       | 0        | 0        | 0         | 1       | 1        |
| Ideonella             | 1              | 18             | 0       | 0       | 0       | 0       | 0       | 0       | 0       | 0        | 0        | 0       | 0        | 0        | 0       | 0       | 0        | 0        | 0         | 0       | 0        |
| Idiomarina            | 2              | 86             | 1       | 0       | 0       | 1       | 0       | 0       | 1       | 0        | 0        | 0       | 0        | 0        | 0       | 1       | 0        | 0        | 0         | 1       | 1        |
| Ignavibacterium       | 1              | 14             | 0       | 0       | 0       | 0       | 0       | 0       | 0       | 0        | 0        | 0       | 0        | 0        | 0       | 0       | 0        | 0        | 0         | 0       | 0        |
| Ignicoccus            | 1              | 5              | 0       | 0       | 0       | 0       | 0       | 0       | 0       | 0        | 0        | 0       | 0        | 0        | 0       | 0       | 0        | 0        | 0         | 0       | 0        |
| Ignisphaera           | 1              | 8              | 0       | 0       | 0       | 0       | 0       | 0       | 0       | 0        | 0        | 0       | 0        | 0        | 0       | 0       | 0        | 0        | 0         | 0       | 0        |
| Ilyobacter            | 2              | 85             | 0       | 0       | 0       | 1       | 0       | 0       | 0       | 0        | 0        | 0       | 0        | 0        | 0       | 1       | 0        | 0        | 0         | 1       | 0        |
| Intrasporangium       | 2              | 114            | 1       | 1       | 0       | 1       | 0       | 0       | 0       | 1        | 0        | 0       | 0        | 1        | 1       | 1       | 0        | 0        | 0         | 1       | 1        |
| Isoptericola          | 1              | 18             | 0       | 0       | 0       | 0       | 0       | 0       | 0       | 0        | 0        | 0       | 0        | 0        | 0       | 0       | 0        | 0        | 0         | 0       | 0        |
| Isosphaera            | 2              | 75             | 0       | 0       | 0       | 0       | 0       | 0       | 1       | 0        | 0        | 0       | 0        | 0        | 1       | 1       | 0        | 0        | 0         | 1       | 1        |
| Jannaschia            | 3              | 151            | 1       | 0       | 0       | 1       | 0       | 1       | 0       | 1        | 0        | 0       | 0        | 0        | 1       | 1       | 0        | 0        | 0         | 1       | 1        |
| Janthinobacterium     | 2              | 99             | 1       | 0       | 0       | 1       | 1       | 0       | 1       | 1        | 0        | 0       | 0        | 0        | 0       | 1       | 0        | 0        | 0         | 1       | 1        |
| Jonesia               | 2              | 56             | 0       | 0       | 0       | 1       | 0       | 0       | 0       | 0        | 0        | 0       | 0        | 0        | 0       | 1       | 0        | 0        | 0         | 0       | 1        |
| Joostella             | 1              | 3              | 0       | 0       | 0       | 0       | 0       | 0       | 0       | 1        | 0        | 0       | 0        | 0        | 0       | 0       | 0        | 0        | 0         | 0       | 0        |
| Kaistia               | 1              | 2              | 0       | 0       | 0       | 0       | 0       | 0       | 0       | 0        | 0        | 0       | 0        | 0        | 0       | 0       | 0        | 0        | 0         | 0       | 0        |
| Kangiella             | 2              | 84             | 0       | 0       | 0       | 1       | 0       | 0       | 1       | 0        | 0        | 0       | 0        | 0        | 0       | 1       | 0        | 0        | 0         | 1       | 1        |
| Ketogulonicigenium    | 2              | 102            | 0       | 0       | 0       | 0       | 0       | 1       | 1       | 1        | 0        | 0       | 0        | 0        | 1       | 1       | 0        | 0        | 0         | 1       | 0        |
| Kineococcus           | 1              | 24             | 0       | 0       | 0       | 0       | 0       | 0       | 0       | 0        | 0        | 0       | 0        | 0        | 0       | 0       | 0        | 0        | 0         | 0       | 0        |
| Kinetoplastibacterium | 1              | 2              | 0       | 0       | 0       | 0       | 0       | 0       | 0       | 0        | 0        | 0       | 0        | 0        | 0       | 0       | 0        | 0        | 0         | 0       | 0        |
| Kingella              | 1              | 4              | 0       | 0       | 0       | 0       | 0       | 0       | 1       | 0        | 0        | 0       | 0        | 0        | 0       | 0       | 0        | 0        | 0         | 0       | 0        |
| Kitasatospora         | 1              | 36             | 0       | 0       | 0       | 0       | 0       | 0       | 0       | 0        | 0        | 0       | 0        | 0        | 0       | 0       | 0        | 0        | 0         | 0       | 0        |
| Klebsiella            | 3              | 222            | 1       | 0       | 0       | 1       | 0       | 0       | 1       | 1        | 0        | 1       | 0        | 0        | 1       | 1       | 1        | 0        | 0         | 1       | 1        |
| Kluyvera              | 1              | 1              | 0       | 0       | 0       | 0       | 0       | 0       | 1       | 0        | 0        | 0       | 0        | 0        | 0       | 0       | 0        | 0        | 0         | 0       | 0        |
| Kocuria               | 2              | 87             | 0       | 0       | 0       | 0       | 0       | 1       | 0       | 1        | 0        | 0       | 0        | 0        | 1       | 1       | 0        | 0        | 0         | 1       | 1        |
| Kordia                | 1              | 5              | 0       | 0       | 0       | 0       | 0       | 0       | 0       | 0        | 0        | 0       | 0        | 0        | 0       | 0       | 0        | 0        | 0         | 0       | 0        |
| Kosmotoga             | 2              | 61             | 0       | 0       | 0       | 1       | 0       | 0       | 0       | 1        | 0        | 0       | 0        | 0        | 0       | 0       | 0        | 0        | 0         | 1       | 0        |
| Kribbella             | 2              | 99             | 1       | 0       | 0       | 1       | 1       | 1       | 0       | 0        | 0        | 0       | 0        | 0        | 1       | 1       | 0        | 1        | 0         | 1       | 1        |
| Krokinobacter         | 2              | 90             | 1       | 0       | 0       | 1       | 0       | 1       | 0       | 1        | 0        | 0       | 0        | 0        | 0       | 1       | 0        | 0        | 0         | 1       | 1        |
| Kyrpidia              | 2              | 113            | 1       | 1       | 0       | 0       | 0       | 0       | 1       | 0        | 0        | 0       | 0        | 1        | 0       | 1       | 0        | 1        | 0         | 1       | 1        |
| Kytococcus            | 2              | 70             | 1       | 0       | 0       | 0       | 0       | 0       | 0       | 0        | 0        | 0       | 0        | 0        | 1       | 1       | 0        | 0        | 0         | 1       | 1        |
| Labrenzia             | 1              | 4              | 0       | 0       | 0       | 0       | 0       | 0       | 0       | 0        | 0        | 0       | 0        | 0        | 0       | 0       | 0        | 0        | 0         | 0       | 0        |
| Lachnoanaerobaculum   | 1              | 1              | 0       | 0       | 0       | 0       | 0       | 0       | 0       | 1        | 0        | 0       | 0        | 0        | 0       | 0       | 0        | 0        | 0         | 0       | 0        |
| Lachnospiraceae       | 1              | 51             | 0       | 0       | 0       | 1       | 0       | 0       | 1       | 1        | 0        | 0       | 0        | 0        | 0       | 0       | 0        | 0        | 0         | 0       | 0        |
| Lacinutrix            | 1              | 20             | 0       | 0       | 0       | 0       | 0       | 0       | 0       | 1        | 0        | 0       | 0        | 0        | 0       | 0       | 0        | 0        | 0         | 0       | 0        |
| Lactobacillus         | 2              | 119            | 0       | 0       | 0       | 1       | 0       | 1       | 1       | 1        | 0        | 0       | 0        | 0        | 0       | 1       | 0        | 0        | 0         | 1       | 0        |
| Lactococcus           | 2              | 82             | 0       | 0       | 0       | 1       | 0       | 1       | 1       | 1        | 0        | 0       | 0        | 0        | 0       | 1       | 0        | 0        | 0         | 1       | 0        |
| Lamprocystis          | 1              | 2              | 0       | 0       | 0       | 0       | 0       | 0       | 0       | 0        | 0        | 0       | 0        | 0        | 0       | 0       | 0        | 0        | 0         | 0       | 0        |
| Laribacter            | 2              | 80             | 0       | 0       | 0       | 0       | 0       | 1       | 1       | 1        | 0        | 0       | 0        | 0        | 0       | 1       | 0        | 0        | 0         | 1       | 1        |
| Lawsonia              | 2              | 33             | 0       | 0       | 0       | 0       | 0       | 0       | 0       | 0        | 0        | 0       | 0        | 0        | 0       | 0       | 0        | 0        | 0         | 1       | 0        |
| Leadbetterella        | 2              | 79             | 1       | 0       | 0       | 1       | 0       | 1       | 1       | 0        | 0        | 0       | 0        | 0        | 0       | 1       | 0        | 0        | 0         | 1       | 1        |
| Leeuwenhoekiiella     | 1              | 2              | 0       | 0       | 0       | 0       | 0       | 0       | 0       | 0        | 0        | 0       | 0        | 0        | 0       | 0       | 0        | 0        | 0         | 0       | 0        |
| Legionella            | 2              | 117            | 1       | 0       | 0       | 0       | 0       | 1       | 1       | 1        | 0        | 1       | 0        | 0        | 0       | 1       | 1        | 0        | 0         | 1       | 1        |
| Leifsonia             | 2              | 48             | 0       | 0       | 0       | 0       | 0       | 0       | 0       | 0        | 0        | 0       | 0        | 0        | 0       | 1       | 0        | 0        | 0         | 1       | 1        |
| Leptolyngbya          | 1              | 10             | 0       | 0       | 0       | 0       | 0       | 0       | 0       | 0        | 0        | 0       | 0        | 0        | 0       | 0       | 0        | 0        | 0         | 0       | 0        |
| Leptospira            | 2              | 76             | 0       | 0       | 0       | 0       | 0       | 1       | 1       | 0        | 0        | 0       | 0        | 0        | 0       | 1       | 0        | 1        | 0         | 1       | 1        |
| Leptospirillum        | 1              | 10             | 0       | 0       | 0       | 0       | 0       | 0       | 0       | 0        | 0        | 0       | 0        | 0        | 0       | 0       | 0        | 0        | 0         | 0       | 0        |
| Leptothrix            | 3              | 186            | 1       | 1       | 0       | 1       | 0       | 1       | 1       | 1        | 0        | 0       | 0        | 1        | 1       | 1       | 0        | 0        | 0         | 1       | 1        |
| Leptotrichia          | 2              | 43             | 0       | 0       | 0       | 0       | 0       | 0       | 0       | 0        | 0        | 0       | 0        | 0        | 1       | 1       | 0        | 0        | 0         | 1       | 0        |
| Leucobacter           | 1              | 2              | 0       | 0       | 0       | 0       | 0       | 0       | 0       | 0        | 0        | 0       | 0        | 0        | 0       | 0       | 0        | 0        | 0         | 0       | 0        |
| Leuconostoc           | 2              | 64             | 0       | 0       | 0       | 0       | 0       | 0       | 0       | 1        | 0        | 0       | 0        | 0        | 0       | 1       | 0        | 0        | 0         | 1       | 0        |

| Genus                | Cluster Number | Protein Counts | 3.7.1.2 | 3.7.1.9 | 3.8.1.- | 3.8.1.2 | 3.8.1.3 | 3.8.1.5 | 4.1.1.- | 4.1.1.44 | 4.1.1.55 | 4.1.1.7 | 4.1.1.70 | 4.1.1.77 | 4.1.2.- | 4.1.3.- | 4.1.3.39 | 4.1.99.- | 4.1.99.11 | 4.2.1.- | 4.2.1.17 |
|----------------------|----------------|----------------|---------|---------|---------|---------|---------|---------|---------|----------|----------|---------|----------|----------|---------|---------|----------|----------|-----------|---------|----------|
| Liberibacter         | 1              | 4              | 0       | 0       | 0       | 0       | 0       | 0       | 0       | 0        | 0        | 0       | 0        | 0        | 0       | 0       | 0        | 0        | 0         | 0       | 0        |
| Limnohabitans        | 1              | 11             | 0       | 0       | 0       | 0       | 0       | 0       | 0       | 0        | 0        | 0       | 0        | 0        | 0       | 0       | 0        | 0        | 0         | 0       | 0        |
| Listeria             | 2              | 77             | 0       | 0       | 0       | 1       | 0       | 0       | 0       | 1        | 0        | 0       | 0        | 0        | 0       | 1       | 0        | 0        | 0         | 1       | 0        |
| Listeriaceae         | 1              | 6              | 0       | 0       | 0       | 0       | 0       | 0       | 0       | 0        | 0        | 0       | 0        | 0        | 0       | 0       | 0        | 0        | 0         | 0       | 0        |
| Listonella           | 1              | 38             | 0       | 0       | 0       | 0       | 0       | 0       | 0       | 0        | 0        | 0       | 0        | 0        | 0       | 1       | 0        | 0        | 0         | 0       | 0        |
| Loktanella           | 1              | 3              | 0       | 0       | 0       | 0       | 0       | 0       | 0       | 0        | 0        | 0       | 0        | 0        | 0       | 0       | 0        | 0        | 0         | 0       | 0        |
| Lysinibacillus       | 2              | 97             | 1       | 0       | 0       | 1       | 0       | 0       | 1       | 0        | 0        | 0       | 0        | 0        | 0       | 1       | 0        | 1        | 0         | 1       | 1        |
| Macrococcus          | 2              | 60             | 0       | 0       | 0       | 0       | 0       | 0       | 1       | 0        | 0        | 0       | 0        | 1        | 0       | 0       | 0        | 0        | 0         | 1       | 0        |
| Magnetococcus        | 2              | 64             | 0       | 0       | 0       | 0       | 0       | 1       | 1       | 0        | 0        | 0       | 0        | 0        | 0       | 1       | 0        | 0        | 0         | 1       | 0        |
| Magnetospirillum     | 2              | 113            | 0       | 0       | 0       | 1       | 0       | 0       | 1       | 1        | 0        | 0       | 0        | 0        | 1       | 1       | 0        | 0        | 0         | 1       | 1        |
| Mahella              | 2              | 58             | 0       | 0       | 0       | 0       | 0       | 0       | 1       | 1        | 0        | 0       | 0        | 0        | 0       | 1       | 0        | 0        | 0         | 1       | 0        |
| Mannheimia           | 2              | 85             | 0       | 0       | 0       | 1       | 0       | 0       | 1       | 1        | 0        | 0       | 0        | 0        | 1       | 1       | 0        | 0        | 0         | 1       | 0        |
| Maribacter           | 3              | 87             | 1       | 0       | 0       | 1       | 0       | 1       | 0       | 1        | 0        | 0       | 0        | 0        | 0       | 1       | 0        | 0        | 0         | 1       | 1        |
| Maricaulis           | 3              | 87             | 0       | 0       | 0       | 0       | 0       | 0       | 1       | 0        | 0        | 0       | 0        | 0        | 0       | 1       | 0        | 0        | 0         | 1       | 1        |
| Marichromatium       | 1              | 2              | 0       | 0       | 0       | 0       | 0       | 0       | 0       | 0        | 0        | 0       | 0        | 0        | 0       | 0       | 0        | 0        | 0         | 0       | 0        |
| Marinithermus        | 2              | 77             | 0       | 0       | 0       | 0       | 0       | 0       | 1       | 1        | 0        | 0       | 0        | 0        | 0       | 1       | 0        | 0        | 0         | 1       | 1        |
| Marinitoga           | 1              | 15             | 0       | 0       | 0       | 0       | 0       | 0       | 0       | 0        | 0        | 0       | 0        | 0        | 0       | 0       | 0        | 0        | 0         | 0       | 0        |
| Marinobacter         | 2              | 163            | 0       | 1       | 0       | 1       | 0       | 1       | 1       | 0        | 0        | 0       | 0        | 1        | 0       | 1       | 0        | 0        | 0         | 1       | 1        |
| Marinomonas          | 3              | 192            | 1       | 0       | 0       | 1       | 0       | 1       | 0       | 1        | 0        | 0       | 0        | 0        | 1       | 1       | 0        | 0        | 0         | 1       | 1        |
| Maritimibacter       | 1              | 7              | 0       | 0       | 0       | 0       | 0       | 0       | 0       | 0        | 0        | 0       | 0        | 0        | 0       | 0       | 0        | 0        | 0         | 0       | 0        |
| Marivirga            | 2              | 96             | 1       | 0       | 0       | 1       | 0       | 0       | 0       | 0        | 0        | 0       | 0        | 0        | 0       | 1       | 0        | 0        | 0         | 1       | 1        |
| Marteella            | 1              | 3              | 0       | 0       | 0       | 0       | 0       | 0       | 0       | 0        | 0        | 0       | 0        | 0        | 0       | 0       | 0        | 0        | 0         | 0       | 0        |
| Marvinbryantia       | 1              | 1              | 0       | 0       | 0       | 0       | 0       | 0       | 0       | 0        | 0        | 0       | 0        | 0        | 0       | 0       | 0        | 0        | 0         | 0       | 0        |
| Massilia             | 1              | 4              | 0       | 0       | 0       | 0       | 0       | 0       | 0       | 0        | 0        | 0       | 0        | 0        | 0       | 0       | 1        | 0        | 0         | 0       | 0        |
| Mastigocladopsis     | 1              | 16             | 0       | 0       | 0       | 0       | 0       | 0       | 1       | 0        | 0        | 0       | 0        | 0        | 0       | 1       | 0        | 0        | 0         | 0       | 0        |
| Megamonas            | 1              | 47             | 0       | 0       | 0       | 0       | 0       | 0       | 1       | 1        | 0        | 0       | 0        | 0        | 0       | 1       | 0        | 0        | 0         | 0       | 1        |
| Megasphaera          | 1              | 14             | 0       | 0       | 0       | 0       | 0       | 0       | 0       | 0        | 0        | 0       | 0        | 0        | 0       | 0       | 0        | 0        | 0         | 0       | 0        |
| Meiothermus          | 2              | 110            | 0       | 0       | 0       | 1       | 0       | 0       | 0       | 1        | 0        | 0       | 0        | 0        | 0       | 1       | 0        | 0        | 0         | 1       | 1        |
| Melissococcus        | 2              | 46             | 0       | 0       | 0       | 0       | 0       | 0       | 1       | 1        | 0        | 0       | 0        | 0        | 0       | 0       | 0        | 0        | 0         | 1       | 0        |
| Mesoflavibacter      | 1              | 6              | 0       | 0       | 0       | 0       | 0       | 0       | 0       | 1        | 0        | 0       | 0        | 0        | 0       | 0       | 0        | 0        | 0         | 0       | 0        |
| Mesoplasma           | 1              | 23             | 0       | 0       | 0       | 0       | 0       | 0       | 0       | 0        | 0        | 0       | 0        | 0        | 0       | 0       | 0        | 0        | 0         | 0       | 0        |
| Mesorhizobium        | 2              | 201            | 1       | 0       | 0       | 1       | 0       | 1       | 0       | 1        | 0        | 0       | 0        | 0        | 1       | 1       | 0        | 0        | 0         | 1       | 1        |
| Mesotoga             | 1              | 14             | 0       | 0       | 0       | 0       | 0       | 0       | 0       | 0        | 0        | 0       | 0        | 0        | 0       | 0       | 0        | 0        | 0         | 0       | 0        |
| Metallosphaera       | 1              | 18             | 0       | 0       | 0       | 0       | 0       | 0       | 0       | 0        | 0        | 0       | 0        | 0        | 0       | 0       | 0        | 0        | 0         | 0       | 0        |
| Methanobacterium     | 1              | 7              | 0       | 0       | 0       | 0       | 0       | 0       | 0       | 0        | 0        | 0       | 0        | 0        | 0       | 0       | 0        | 0        | 0         | 0       | 0        |
| Methanobrevibacter   | 1              | 9              | 0       | 0       | 0       | 0       | 0       | 0       | 0       | 0        | 0        | 0       | 0        | 0        | 0       | 0       | 0        | 0        | 0         | 0       | 0        |
| Methanocaldococcus   | 1              | 6              | 0       | 0       | 0       | 0       | 0       | 0       | 0       | 0        | 0        | 0       | 0        | 0        | 0       | 0       | 0        | 0        | 0         | 0       | 0        |
| Methanocella         | 1              | 15             | 0       | 0       | 0       | 0       | 0       | 0       | 0       | 0        | 0        | 0       | 0        | 0        | 0       | 0       | 0        | 0        | 0         | 0       | 0        |
| Methanococcaceae     | 1              | 1              | 0       | 0       | 0       | 0       | 0       | 0       | 0       | 0        | 0        | 0       | 0        | 0        | 0       | 0       | 0        | 0        | 0         | 0       | 0        |
| Methanococcoides     | 1              | 5              | 0       | 0       | 0       | 0       | 0       | 0       | 0       | 0        | 0        | 0       | 0        | 0        | 0       | 0       | 0        | 0        | 0         | 0       | 0        |
| Methanococcus        | 1              | 9              | 0       | 0       | 0       | 0       | 0       | 0       | 0       | 0        | 0        | 0       | 0        | 0        | 0       | 0       | 0        | 0        | 0         | 0       | 0        |
| Methanocorpusculum   | 1              | 7              | 0       | 0       | 0       | 0       | 0       | 0       | 0       | 0        | 0        | 0       | 0        | 0        | 0       | 0       | 0        | 0        | 0         | 0       | 0        |
| Methanoculleus       | 1              | 8              | 0       | 0       | 0       | 0       | 0       | 0       | 0       | 0        | 0        | 0       | 0        | 0        | 0       | 0       | 0        | 0        | 0         | 0       | 0        |
| Methanohalobium      | 1              | 5              | 0       | 0       | 0       | 0       | 0       | 0       | 0       | 0        | 0        | 0       | 0        | 0        | 0       | 0       | 0        | 0        | 0         | 0       | 0        |
| Methanohalophilus    | 1              | 5              | 0       | 0       | 0       | 0       | 0       | 0       | 0       | 0        | 0        | 0       | 0        | 0        | 0       | 0       | 0        | 0        | 0         | 0       | 0        |
| Methanolobus         | 1              | 5              | 0       | 0       | 0       | 0       | 0       | 0       | 0       | 0        | 0        | 0       | 0        | 0        | 0       | 0       | 0        | 0        | 0         | 0       | 0        |
| Methanomethylovorans | 1              | 5              | 0       | 0       | 0       | 0       | 0       | 0       | 0       | 0        | 0        | 0       | 0        | 0        | 0       | 0       | 0        | 0        | 0         | 0       | 0        |
| Methanoplanus        | 1              | 7              | 0       | 0       | 0       | 0       | 0       | 0       | 0       | 0        | 0        | 0       | 0        | 0        | 0       | 0       | 0        | 0        | 0         | 0       | 0        |
| Methanopyrus         | 1              | 4              | 0       | 0       | 0       | 0       | 0       | 0       | 0       | 0        | 0        | 0       | 0        | 0        | 0       | 0       | 0        | 0        | 0         | 0       | 0        |
| Methanoregula        | 1              | 8              | 0       | 0       | 0       | 0       | 0       | 0       | 0       | 0        | 0        | 0       | 0        | 0        | 0       | 0       | 0        | 0        | 0         | 0       | 0        |
| Methanosaeta         | 1              | 9              | 0       | 0       | 0       | 0       | 0       | 0       | 0       | 0        | 0        | 0       | 0        | 0        | 0       | 0       | 0        | 0        | 0         | 0       | 0        |
| Methanosalsum        | 1              | 7              | 0       | 0       | 0       | 0       | 0       | 0       | 0       | 0        | 0        | 0       | 0        | 0        | 0       | 0       | 0        | 0        | 0         | 0       | 0        |

| Genus               | Cluster Number | Protein Counts | 3.7.1.2 | 3.7.1.9 | 3.8.1.- | 3.8.1.2 | 3.8.1.3 | 3.8.1.5 | 4.1.1.- | 4.1.1.44 | 4.1.1.55 | 4.1.1.7 | 4.1.1.70 | 4.1.1.77 | 4.1.2.- | 4.1.3.- | 4.1.3.39 | 4.1.99.- | 4.1.99.11 | 4.2.1.- | 4.2.1.17 |
|---------------------|----------------|----------------|---------|---------|---------|---------|---------|---------|---------|----------|----------|---------|----------|----------|---------|---------|----------|----------|-----------|---------|----------|
| Methanosarcina      | 1              | 18             | 0       | 0       | 0       | 0       | 0       | 0       | 0       | 0        | 0        | 0       | 0        | 0        | 0       | 0       | 0        | 0        | 0         | 0       | 0        |
| Methanosphaera      | 1              | 7              | 0       | 0       | 0       | 0       | 0       | 0       | 0       | 0        | 0        | 0       | 0        | 0        | 0       | 0       | 0        | 0        | 0         | 0       | 0        |
| Methanosphaerula    | 1              | 8              | 0       | 0       | 0       | 0       | 0       | 0       | 0       | 0        | 0        | 0       | 0        | 0        | 0       | 0       | 0        | 0        | 0         | 0       | 0        |
| Methanospirillum    | 1              | 6              | 0       | 0       | 0       | 0       | 0       | 0       | 0       | 0        | 0        | 0       | 0        | 0        | 0       | 0       | 0        | 0        | 0         | 0       | 0        |
| Methanothermobacter | 1              | 6              | 0       | 0       | 0       | 0       | 0       | 0       | 0       | 0        | 0        | 0       | 0        | 0        | 0       | 0       | 0        | 0        | 0         | 0       | 0        |
| Methanothermococcus | 1              | 5              | 0       | 0       | 0       | 0       | 0       | 0       | 0       | 0        | 0        | 0       | 0        | 0        | 0       | 0       | 0        | 0        | 0         | 0       | 0        |
| Methanothermus      | 1              | 5              | 0       | 0       | 0       | 0       | 0       | 0       | 0       | 0        | 0        | 0       | 0        | 0        | 0       | 0       | 0        | 0        | 0         | 0       | 0        |
| Methanoterris       | 1              | 5              | 0       | 0       | 0       | 0       | 0       | 0       | 0       | 0        | 0        | 0       | 0        | 0        | 0       | 0       | 0        | 0        | 0         | 0       | 0        |
| Methylacidiphilum   | 2              | 48             | 0       | 0       | 0       | 0       | 0       | 0       | 1       | 0        | 0        | 0       | 0        | 0        | 0       | 1       | 0        | 0        | 0         | 0       | 0        |
| Methylarcula        | 1              | 2              | 0       | 0       | 0       | 0       | 0       | 0       | 0       | 0        | 0        | 0       | 0        | 0        | 0       | 0       | 0        | 0        | 0         | 1       | 0        |
| Methylibium         | 1              | 38             | 0       | 0       | 0       | 0       | 0       | 0       | 0       | 0        | 0        | 0       | 0        | 0        | 0       | 0       | 0        | 0        | 0         | 0       | 0        |
| Methylobacillus     | 2              | 61             | 0       | 0       | 0       | 0       | 0       | 0       | 0       | 0        | 0        | 0       | 0        | 0        | 0       | 1       | 0        | 0        | 0         | 1       | 0        |
| Methylobacterium    | 3              | 236            | 1       | 0       | 0       | 1       | 0       | 1       | 1       | 1        | 0        | 1       | 0        | 1        | 1       | 1       | 0        | 1        | 0         | 1       | 1        |
| Methylocella        | 3              | 117            | 0       | 0       | 0       | 1       | 0       | 0       | 1       | 1        | 0        | 1       | 0        | 1        | 0       | 1       | 1        | 0        | 0         | 1       | 1        |
| Methylococcus       | 2              | 80             | 0       | 0       | 0       | 0       | 0       | 0       | 1       | 0        | 0        | 0       | 0        | 0        | 0       | 1       | 0        | 0        | 0         | 1       | 0        |
| Methylocystis       | 1              | 21             | 0       | 0       | 0       | 0       | 0       | 0       | 0       | 0        | 0        | 0       | 0        | 0        | 0       | 0       | 0        | 0        | 0         | 0       | 0        |
| Methyloferula       | 1              | 2              | 0       | 0       | 0       | 0       | 0       | 0       | 0       | 0        | 0        | 0       | 0        | 0        | 0       | 0       | 0        | 0        | 0         | 0       | 0        |
| Methylomicrobium    | 1              | 12             | 0       | 0       | 0       | 0       | 0       | 0       | 0       | 0        | 0        | 0       | 0        | 0        | 0       | 0       | 0        | 0        | 0         | 0       | 0        |
| Methylomonas        | 1              | 15             | 0       | 0       | 0       | 0       | 0       | 0       | 0       | 0        | 0        | 0       | 0        | 0        | 0       | 0       | 0        | 0        | 0         | 0       | 0        |
| Methylophaga        | 1              | 7              | 0       | 0       | 0       | 0       | 0       | 0       | 0       | 0        | 0        | 0       | 0        | 0        | 0       | 0       | 0        | 0        | 0         | 0       | 0        |
| Methylophilus       | 1              | 2              | 0       | 0       | 0       | 0       | 0       | 0       | 0       | 0        | 0        | 0       | 0        | 0        | 0       | 0       | 0        | 0        | 0         | 0       | 0        |
| Methylosinus        | 1              | 2              | 0       | 0       | 0       | 0       | 0       | 0       | 0       | 0        | 0        | 0       | 0        | 0        | 0       | 0       | 0        | 0        | 0         | 0       | 0        |
| Methylotenera       | 2              | 72             | 0       | 0       | 0       | 0       | 0       | 0       | 0       | 1        | 0        | 0       | 0        | 0        | 0       | 1       | 0        | 0        | 0         | 1       | 1        |
| Methyloversatilis   | 1              | 5              | 0       | 0       | 0       | 0       | 0       | 0       | 0       | 0        | 0        | 0       | 0        | 0        | 0       | 0       | 0        | 0        | 0         | 0       | 0        |
| Methylovorus        | 2              | 66             | 0       | 0       | 0       | 0       | 0       | 0       | 0       | 0        | 0        | 0       | 0        | 0        | 0       | 1       | 0        | 0        | 0         | 1       | 0        |
| Micavibrio          | 1              | 9              | 0       | 0       | 0       | 0       | 0       | 0       | 0       | 0        | 0        | 0       | 0        | 0        | 0       | 0       | 0        | 0        | 0         | 0       | 0        |
| Microbacterium      | 2              | 115            | 1       | 0       | 0       | 0       | 0       | 0       | 1       | 1        | 0        | 0       | 0        | 0        | 1       | 1       | 0        | 1        | 0         | 0       | 1        |
| Microchaete         | 1              | 23             | 0       | 0       | 0       | 0       | 0       | 0       | 1       | 0        | 0        | 0       | 0        | 0        | 0       | 0       | 0        | 0        | 0         | 0       | 0        |
| Micrococcus         | 2              | 72             | 0       | 0       | 0       | 0       | 0       | 0       | 0       | 0        | 0        | 0       | 0        | 0        | 1       | 1       | 0        | 0        | 0         | 1       | 1        |
| Microcoleus         | 1              | 17             | 0       | 0       | 0       | 0       | 0       | 0       | 1       | 0        | 0        | 0       | 0        | 0        | 0       | 0       | 0        | 0        | 0         | 0       | 0        |
| Microcystis         | 2              | 67             | 0       | 0       | 0       | 0       | 0       | 0       | 1       | 0        | 0        | 0       | 0        | 0        | 0       | 1       | 0        | 0        | 0         | 1       | 0        |
| Microlunatus        | 1              | 25             | 0       | 0       | 0       | 0       | 0       | 0       | 0       | 0        | 0        | 0       | 0        | 0        | 0       | 0       | 0        | 0        | 0         | 0       | 0        |
| Micromonospora      | 2              | 115            | 1       | 0       | 0       | 1       | 0       | 0       | 1       | 0        | 0        | 1       | 0        | 1        | 0       | 1       | 1        | 0        | 0         | 1       | 1        |
| Microvirga          | 1              | 6              | 0       | 0       | 0       | 0       | 0       | 0       | 0       | 0        | 0        | 0       | 0        | 0        | 0       | 0       | 0        | 0        | 0         | 0       | 0        |
| Mobiluncus          | 1              | 41             | 0       | 0       | 0       | 0       | 0       | 0       | 0       | 0        | 0        | 0       | 0        | 0        | 0       | 1       | 0        | 0        | 0         | 0       | 0        |
| Modestobacter       | 1              | 43             | 0       | 0       | 0       | 0       | 0       | 0       | 0       | 0        | 0        | 0       | 0        | 0        | 0       | 0       | 0        | 0        | 0         | 0       | 0        |
| Moorea              | 1              | 2              | 0       | 0       | 0       | 0       | 0       | 0       | 1       | 0        | 0        | 0       | 0        | 0        | 0       | 0       | 0        | 0        | 0         | 0       | 0        |
| Moorella            | 2              | 69             | 0       | 0       | 0       | 0       | 0       | 0       | 1       | 1        | 0        | 0       | 0        | 1        | 0       | 1       | 1        | 1        | 0         | 1       | 0        |
| Moraxella           | 2              | 66             | 0       | 0       | 0       | 0       | 0       | 0       | 1       | 1        | 0        | 0       | 0        | 0        | 0       | 1       | 0        | 0        | 0         | 1       | 1        |
| Morganella          | 1              | 29             | 0       | 0       | 0       | 0       | 0       | 0       | 1       | 0        | 0        | 0       | 0        | 0        | 0       | 0       | 0        | 0        | 0         | 0       | 0        |
| Moritella           | 1              | 2              | 0       | 0       | 0       | 0       | 0       | 0       | 0       | 0        | 0        | 0       | 0        | 0        | 0       | 0       | 0        | 0        | 0         | 0       | 0        |
| Muricauda           | 1              | 23             | 0       | 0       | 0       | 0       | 0       | 0       | 0       | 1        | 0        | 0       | 0        | 0        | 0       | 0       | 0        | 0        | 0         | 0       | 0        |
| Mycobacterium       | 3              | 306            | 1       | 1       | 0       | 1       | 1       | 1       | 1       | 1        | 1        | 1       | 0        | 1        | 1       | 1       | 1        | 1        | 0         | 1       | 1        |
| Mycoplasma          | 1              | 53             | 0       | 0       | 0       | 0       | 0       | 0       | 1       | 1        | 0        | 0       | 0        | 0        | 0       | 0       | 0        | 0        | 0         | 0       | 0        |
| Myxococcus          | 2              | 110            | 0       | 0       | 0       | 0       | 0       | 1       | 0       | 0        | 0        | 0       | 0        | 1        | 0       | 1       | 0        | 0        | 0         | 1       | 1        |
| Nakamurella         | 2              | 115            | 1       | 1       | 0       | 0       | 0       | 1       | 0       | 0        | 0        | 0       | 0        | 1        | 1       | 1       | 1        | 0        | 0         | 1       | 1        |
| napthalene          | 1              | 2              | 0       | 0       | 0       | 0       | 0       | 0       | 0       | 0        | 0        | 0       | 0        | 0        | 0       | 0       | 0        | 0        | 0         | 0       | 0        |
| Natranaerobius      | 2              | 55             | 0       | 0       | 0       | 0       | 0       | 0       | 0       | 1        | 0        | 0       | 0        | 0        | 0       | 1       | 0        | 0        | 0         | 1       | 0        |
| Natrialba           | 1              | 16             | 0       | 0       | 0       | 0       | 0       | 0       | 0       | 0        | 0        | 0       | 0        | 0        | 0       | 0       | 0        | 0        | 0         | 0       | 0        |
| Natrinema           | 1              | 16             | 0       | 0       | 0       | 0       | 0       | 0       | 0       | 0        | 0        | 0       | 0        | 0        | 0       | 0       | 0        | 0        | 0         | 0       | 0        |
| Natronobacterium    | 1              | 11             | 0       | 0       | 0       | 0       | 0       | 0       | 0       | 0        | 0        | 0       | 0        | 0        | 0       | 0       | 0        | 0        | 0         | 0       | 0        |
| Natronococcus       | 1              | 21             | 0       | 0       | 0       | 0       | 0       | 0       | 0       | 0        | 0        | 0       | 0        | 0        | 0       | 0       | 0        | 0        | 0         | 0       | 0        |



| Genus             | Cluster Number | Protein Counts | 3.7.1.2 | 3.7.1.9 | 3.8.1.- | 3.8.1.2 | 3.8.1.3 | 3.8.1.5 | 4.1.1.- | 4.1.1.44 | 4.1.1.55 | 4.1.1.7 | 4.1.1.70 | 4.1.1.77 | 4.1.2.- | 4.1.3.- | 4.1.3.39 | 4.1.99.- | 4.1.99.11 | 4.2.1.- | 4.2.1.17 |
|-------------------|----------------|----------------|---------|---------|---------|---------|---------|---------|---------|----------|----------|---------|----------|----------|---------|---------|----------|----------|-----------|---------|----------|
| Natronomonas      | 1              | 20             | 0       | 0       | 0       | 0       | 0       | 0       | 0       | 0        | 0        | 0       | 0        | 0        | 0       | 0       | 0        | 0        | 0         | 0       | 0        |
| Nautilia          | 2              | 48             | 0       | 0       | 0       | 0       | 0       | 0       | 1       | 0        | 0        | 0       | 0        | 0        | 0       | 1       | 0        | 1        | 0         | 1       | 0        |
| Neisseria         | 2              | 67             | 0       | 0       | 0       | 1       | 0       | 0       | 1       | 0        | 0        | 0       | 0        | 0        | 0       | 1       | 0        | 0        | 0         | 1       | 0        |
| Neisseriaceae     | 1              | 1              | 0       | 0       | 0       | 0       | 0       | 0       | 0       | 1        | 0        | 0       | 0        | 0        | 0       | 0       | 0        | 0        | 0         | 0       | 0        |
| Neorickettsia     | 1              | 31             | 0       | 0       | 0       | 0       | 0       | 0       | 0       | 0        | 0        | 0       | 0        | 0        | 0       | 0       | 0        | 0        | 0         | 1       | 0        |
| Neptuniibacter    | 1              | 2              | 0       | 0       | 0       | 0       | 0       | 0       | 0       | 0        | 0        | 0       | 0        | 0        | 0       | 0       | 0        | 0        | 0         | 0       | 0        |
| Niastella         | 1              | 21             | 0       | 0       | 0       | 0       | 0       | 0       | 0       | 0        | 0        | 0       | 0        | 0        | 0       | 0       | 0        | 0        | 0         | 0       | 0        |
| Nitratifractor    | 2              | 54             | 0       | 0       | 0       | 0       | 0       | 0       | 1       | 0        | 0        | 0       | 0        | 0        | 0       | 1       | 0        | 0        | 0         | 1       | 0        |
| Nitratireductor   | 1              | 19             | 0       | 0       | 0       | 0       | 0       | 0       | 1       | 0        | 0        | 0       | 0        | 0        | 0       | 1       | 0        | 0        | 0         | 0       | 0        |
| Nitratiruptor     | 2              | 40             | 0       | 0       | 0       | 0       | 0       | 0       | 0       | 0        | 0        | 0       | 0        | 0        | 0       | 1       | 0        | 1        | 0         | 1       | 0        |
| Nitrobacter       | 2              | 99             | 1       | 0       | 0       | 0       | 0       | 0       | 0       | 1        | 0        | 1       | 0        | 0        | 0       | 1       | 0        | 0        | 0         | 1       | 1        |
| Nitrococcus       | 1              | 2              | 0       | 0       | 0       | 0       | 0       | 0       | 0       | 0        | 0        | 0       | 0        | 0        | 0       | 0       | 0        | 0        | 0         | 0       | 0        |
| Nitrosococcus     | 2              | 94             | 1       | 0       | 0       | 1       | 0       | 0       | 1       | 0        | 0        | 0       | 0        | 0        | 0       | 1       | 0        | 0        | 0         | 1       | 1        |
| Nitrosomonas      | 2              | 72             | 0       | 0       | 0       | 0       | 0       | 0       | 1       | 0        | 0        | 0       | 0        | 0        | 1       | 1       | 0        | 0        | 0         | 1       | 1        |
| Nitrosopumilaceae | 1              | 7              | 0       | 0       | 0       | 0       | 0       | 0       | 0       | 0        | 0        | 0       | 0        | 0        | 0       | 0       | 0        | 0        | 0         | 0       | 0        |
| Nitrosopumilus    | 1              | 11             | 0       | 0       | 0       | 0       | 0       | 0       | 0       | 0        | 0        | 0       | 0        | 0        | 0       | 0       | 0        | 0        | 0         | 0       | 0        |
| Nitrosospira      | 2              | 74             | 0       | 0       | 0       | 0       | 0       | 0       | 1       | 0        | 0        | 0       | 0        | 0        | 1       | 1       | 0        | 0        | 0         | 1       | 1        |
| Nocardia          | 2              | 185            | 1       | 0       | 0       | 0       | 0       | 1       | 0       | 1        | 0        | 0       | 0        | 1        | 1       | 1       | 1        | 0        | 0         | 1       | 1        |
| Nocardiodiaceae   | 1              | 2              | 0       | 0       | 0       | 0       | 0       | 0       | 0       | 0        | 0        | 0       | 0        | 0        | 0       | 0       | 0        | 0        | 0         | 0       | 0        |
| Nocardiodes       | 2              | 157            | 1       | 0       | 0       | 1       | 0       | 1       | 0       | 1        | 0        | 0       | 0        | 1        | 1       | 1       | 1        | 0        | 0         | 1       | 1        |
| Nocardiosis       | 2              | 102            | 1       | 0       | 0       | 1       | 0       | 0       | 0       | 0        | 0        | 0       | 0        | 0        | 0       | 1       | 1        | 0        | 0         | 1       | 1        |
| Nodularia         | 1              | 22             | 0       | 0       | 0       | 0       | 0       | 0       | 1       | 0        | 0        | 0       | 0        | 0        | 0       | 1       | 0        | 0        | 0         | 0       | 0        |
| Nonlabens         | 1              | 19             | 0       | 0       | 0       | 0       | 0       | 0       | 0       | 0        | 0        | 0       | 0        | 0        | 0       | 0       | 0        | 0        | 0         | 0       | 0        |
| Nostoc            | 2              | 111            | 0       | 0       | 0       | 1       | 0       | 1       | 1       | 1        | 0        | 1       | 0        | 0        | 1       | 1       | 0        | 1        | 0         | 1       | 1        |
| Nostocaceae       | 1              | 2              | 0       | 0       | 0       | 0       | 0       | 0       | 0       | 0        | 0        | 0       | 0        | 0        | 0       | 0       | 0        | 0        | 0         | 0       | 0        |
| Novosphingobium   | 2              | 169            | 1       | 0       | 0       | 0       | 0       | 1       | 1       | 0        | 0        | 1       | 0        | 0        | 0       | 1       | 1        | 0        | 0         | 1       | 1        |
| Oceanibaculum     | 1              | 3              | 0       | 0       | 0       | 0       | 0       | 0       | 0       | 0        | 0        | 0       | 0        | 0        | 0       | 0       | 0        | 0        | 0         | 0       | 0        |
| Oceanibulbus      | 1              | 12             | 0       | 0       | 0       | 0       | 0       | 0       | 0       | 0        | 0        | 0       | 0        | 0        | 0       | 0       | 0        | 0        | 0         | 1       | 0        |
| Oceanicola        | 1              | 9              | 0       | 0       | 0       | 0       | 0       | 0       | 0       | 0        | 0        | 0       | 0        | 0        | 0       | 0       | 0        | 0        | 0         | 0       | 0        |
| Oceanimonas       | 1              | 33             | 0       | 0       | 0       | 0       | 0       | 0       | 0       | 0        | 0        | 0       | 0        | 0        | 0       | 0       | 0        | 0        | 0         | 0       | 0        |
| Oceaniovalibus    | 1              | 2              | 0       | 0       | 0       | 0       | 0       | 0       | 0       | 0        | 0        | 0       | 0        | 0        | 0       | 1       | 0        | 0        | 0         | 0       | 0        |
| Oceanithermus     | 2              | 72             | 0       | 0       | 0       | 0       | 0       | 0       | 1       | 1        | 0        | 0       | 0        | 0        | 0       | 1       | 0        | 0        | 0         | 1       | 1        |
| Oceanobacillus    | 2              | 91             | 0       | 0       | 0       | 1       | 0       | 0       | 0       | 1        | 0        | 0       | 0        | 0        | 0       | 1       | 0        | 1        | 0         | 1       | 1        |
| Oceanospirillum   | 1              | 2              | 0       | 0       | 0       | 0       | 0       | 0       | 0       | 0        | 0        | 0       | 0        | 0        | 0       | 0       | 0        | 0        | 0         | 0       | 0        |
| Ochrobactrum      | 2              | 133            | 0       | 0       | 0       | 1       | 0       | 1       | 1       | 1        | 0        | 0       | 0        | 0        | 0       | 1       | 0        | 0        | 0         | 1       | 1        |
| Octadecabacter    | 1              | 29             | 0       | 0       | 0       | 0       | 0       | 0       | 0       | 0        | 0        | 0       | 0        | 0        | 0       | 0       | 0        | 0        | 0         | 0       | 0        |
| Oenococcus        | 2              | 41             | 0       | 0       | 0       | 0       | 0       | 0       | 1       | 0        | 0        | 0       | 0        | 0        | 0       | 0       | 0        | 0        | 0         | 1       | 0        |
| Oleomonas         | 1              | 2              | 0       | 0       | 0       | 0       | 0       | 0       | 0       | 0        | 0        | 0       | 0        | 0        | 0       | 0       | 0        | 0        | 0         | 0       | 0        |
| Oligotropha       | 3              | 87             | 1       | 0       | 0       | 1       | 0       | 0       | 1       | 1        | 0        | 0       | 0        | 0        | 0       | 1       | 0        | 0        | 0         | 1       | 1        |
| Olsenella         | 2              | 40             | 0       | 0       | 0       | 0       | 0       | 0       | 1       | 0        | 0        | 0       | 0        | 0        | 0       | 1       | 0        | 0        | 0         | 0       | 1        |
| Opitutus          | 2              | 67             | 0       | 0       | 0       | 0       | 0       | 0       | 0       | 0        | 0        | 0       | 0        | 0        | 0       | 1       | 0        | 0        | 0         | 1       | 0        |
| Orientia          | 1              | 21             | 0       | 0       | 0       | 0       | 0       | 0       | 1       | 0        | 0        | 0       | 0        | 0        | 0       | 0       | 0        | 0        | 0         | 1       | 0        |
| Ornithobacterium  | 1              | 11             | 0       | 0       | 0       | 0       | 0       | 0       | 0       | 0        | 0        | 0       | 0        | 0        | 0       | 0       | 0        | 0        | 0         | 0       | 0        |
| Oscillatoria      | 1              | 16             | 0       | 0       | 0       | 0       | 0       | 0       | 1       | 0        | 0        | 0       | 0        | 0        | 0       | 0       | 0        | 0        | 0         | 0       | 0        |
| Oscillatoriales   | 1              | 2              | 0       | 0       | 0       | 0       | 0       | 0       | 0       | 0        | 0        | 0       | 0        | 0        | 0       | 0       | 0        | 0        | 0         | 0       | 0        |
| Oscillibacter     | 1              | 20             | 0       | 0       | 0       | 0       | 0       | 0       | 0       | 0        | 0        | 0       | 0        | 0        | 0       | 0       | 0        | 0        | 0         | 0       | 0        |
| Owenweeksia       | 1              | 15             | 0       | 0       | 0       | 0       | 0       | 0       | 0       | 0        | 0        | 0       | 0        | 0        | 0       | 0       | 0        | 0        | 0         | 0       | 0        |
| Oxalobacteraceae  | 1              | 4              | 0       | 0       | 0       | 0       | 0       | 0       | 0       | 0        | 0        | 0       | 0        | 0        | 0       | 0       | 0        | 0        | 0         | 0       | 0        |
| Paenibacillus     | 2              | 152            | 1       | 0       | 0       | 1       | 0       | 1       | 1       | 1        | 0        | 0       | 0        | 0        | 0       | 1       | 0        | 1        | 0         | 1       | 1        |
| Paludibacter      | 2              | 67             | 0       | 0       | 0       | 0       | 0       | 0       | 1       | 0        | 0        | 0       | 0        | 0        | 0       | 1       | 0        | 0        | 0         | 1       | 0        |
| Pandoraea         | 1              | 18             | 0       | 0       | 0       | 0       | 0       | 0       | 0       | 0        | 1        | 0       | 0        | 0        | 0       | 1       | 0        | 0        | 0         | 0       | 0        |
| Pannonibacter     | 1              | 3              | 0       | 0       | 0       | 0       | 0       | 0       | 0       | 0        | 0        | 0       | 0        | 0        | 0       | 0       | 0        | 0        | 0         | 0       | 0        |

| Genus              | Cluster Number | Protein Counts | 3.7.1.2 | 3.7.1.9 | 3.8.1.- | 3.8.1.2 | 3.8.1.3 | 3.8.1.5 | 4.1.1.- | 4.1.1.44 | 4.1.1.55 | 4.1.1.7 | 4.1.1.70 | 4.1.1.77 | 4.1.2.- | 4.1.3.- | 4.1.3.39 | 4.1.99.- | 4.1.99.11 | 4.2.1.- | 4.2.1.17 |
|--------------------|----------------|----------------|---------|---------|---------|---------|---------|---------|---------|----------|----------|---------|----------|----------|---------|---------|----------|----------|-----------|---------|----------|
| Pantholops         | 1              | 23             | 0       | 0       | 0       | 0       | 0       | 0       | 0       | 0        | 0        | 0       | 0        | 0        | 0       | 0       | 0        | 0        | 0         | 0       | 1        |
| Pantoea            | 2              | 181            | 0       | 0       | 0       | 1       | 0       | 1       | 1       | 1        | 1        | 0       | 0        | 0        | 1       | 1       | 0        | 0        | 0         | 1       | 1        |
| Parabacteroides    | 2              | 64             | 0       | 0       | 0       | 1       | 0       | 0       | 1       | 1        | 0        | 0       | 0        | 0        | 0       | 1       | 0        | 0        | 0         | 1       | 0        |
| Parachlamydia      | 1              | 11             | 0       | 0       | 0       | 0       | 0       | 0       | 0       | 0        | 0        | 0       | 0        | 0        | 0       | 0       | 0        | 0        | 0         | 0       | 0        |
| Paracoccus         | 2              | 169            | 1       | 0       | 0       | 1       | 0       | 1       | 1       | 1        | 1        | 0       | 0        | 0        | 1       | 1       | 0        | 0        | 0         | 1       | 1        |
| Parvibaculum       | 3              | 117            | 1       | 0       | 0       | 1       | 0       | 1       | 1       | 0        | 0        | 0       | 0        | 0        | 0       | 1       | 0        | 0        | 0         | 1       | 1        |
| Parvularcula       | 2              | 72             | 0       | 0       | 0       | 0       | 0       | 1       | 1       | 0        | 0        | 0       | 0        | 0        | 0       | 1       | 0        | 0        | 0         | 1       | 1        |
| Pasteurella        | 2              | 85             | 0       | 0       | 0       | 1       | 0       | 0       | 1       | 1        | 0        | 0       | 0        | 0        | 1       | 1       | 0        | 0        | 0         | 1       | 0        |
| Pasteurellaceae    | 1              | 2              | 0       | 0       | 0       | 0       | 0       | 0       | 0       | 0        | 0        | 0       | 0        | 0        | 0       | 0       | 0        | 0        | 0         | 0       | 0        |
| Pectobacterium     | 1              | 44             | 0       | 0       | 0       | 0       | 0       | 0       | 1       | 0        | 0        | 0       | 0        | 0        | 0       | 1       | 0        | 0        | 0         | 1       | 0        |
| Pediococcus        | 1              | 43             | 0       | 0       | 0       | 0       | 0       | 1       | 1       | 1        | 0        | 0       | 0        | 0        | 0       | 0       | 0        | 0        | 0         | 1       | 0        |
| Pedobacter         | 2              | 88             | 1       | 0       | 0       | 1       | 0       | 0       | 1       | 0        | 0        | 0       | 0        | 0        | 0       | 1       | 0        | 0        | 0         | 1       | 1        |
| Pelagibaca         | 1              | 10             | 0       | 0       | 0       | 0       | 0       | 0       | 0       | 0        | 0        | 0       | 0        | 0        | 0       | 1       | 0        | 0        | 0         | 1       | 0        |
| Pelagibacterium    | 1              | 39             | 0       | 0       | 0       | 0       | 0       | 0       | 0       | 0        | 0        | 0       | 0        | 0        | 0       | 0       | 0        | 0        | 0         | 0       | 0        |
| Pelobacter         | 2              | 85             | 0       | 0       | 0       | 0       | 0       | 0       | 1       | 0        | 0        | 0       | 0        | 0        | 0       | 1       | 0        | 0        | 0         | 1       | 1        |
| Pelodictyon        | 2              | 62             | 0       | 0       | 0       | 0       | 0       | 1       | 0       | 0        | 0        | 0       | 0        | 0        | 0       | 1       | 0        | 0        | 0         | 1       | 0        |
| Pelosinus          | 1              | 1              | 0       | 0       | 0       | 0       | 0       | 0       | 0       | 0        | 0        | 0       | 0        | 0        | 0       | 0       | 0        | 0        | 0         | 0       | 1        |
| Pelotomaculum      | 2              | 60             | 0       | 0       | 0       | 0       | 0       | 0       | 1       | 1        | 0        | 0       | 0        | 0        | 0       | 1       | 1        | 0        | 0         | 1       | 1        |
| Peptostreptococcus | 1              | 1              | 0       | 0       | 0       | 0       | 0       | 0       | 0       | 0        | 0        | 0       | 0        | 0        | 0       | 0       | 0        | 0        | 0         | 0       | 0        |
| Persephonella      | 2              | 55             | 0       | 0       | 0       | 0       | 0       | 0       | 1       | 0        | 0        | 0       | 0        | 0        | 0       | 1       | 0        | 0        | 0         | 1       | 0        |
| Petrogona          | 2              | 72             | 0       | 0       | 0       | 1       | 0       | 0       | 0       | 1        | 0        | 0       | 0        | 0        | 0       | 1       | 0        | 1        | 0         | 1       | 0        |
| Phaeobacter        | 2              | 55             | 0       | 0       | 0       | 0       | 0       | 0       | 0       | 0        | 0        | 0       | 0        | 0        | 0       | 1       | 0        | 0        | 0         | 0       | 1        |
| Phenylobacterium   | 3              | 103            | 1       | 0       | 0       | 1       | 0       | 0       | 1       | 0        | 0        | 0       | 0        | 0        | 0       | 1       | 0        | 0        | 0         | 1       | 1        |
| Photobacterium     | 2              | 119            | 0       | 0       | 0       | 1       | 0       | 0       | 1       | 1        | 0        | 0       | 0        | 0        | 0       | 1       | 0        | 0        | 0         | 1       | 1        |
| Photorhabdus       | 2              | 149            | 0       | 0       | 0       | 1       | 0       | 0       | 1       | 1        | 0        | 0       | 0        | 0        | 1       | 1       | 0        | 0        | 0         | 1       | 1        |
| Phycisphaera       | 1              | 9              | 0       | 0       | 0       | 0       | 0       | 0       | 0       | 0        | 0        | 0       | 0        | 0        | 0       | 0       | 0        | 0        | 0         | 0       | 0        |
| Phyllobacterium    | 1              | 6              | 0       | 0       | 0       | 0       | 0       | 0       | 0       | 0        | 0        | 0       | 0        | 0        | 0       | 1       | 0        | 0        | 0         | 0       | 0        |
| Picrophilus        | 1              | 15             | 0       | 0       | 0       | 0       | 0       | 0       | 0       | 0        | 0        | 0       | 0        | 0        | 0       | 0       | 0        | 0        | 0         | 0       | 0        |
| Pirellula          | 2              | 85             | 0       | 0       | 0       | 0       | 0       | 0       | 1       | 0        | 0        | 1       | 0        | 0        | 1       | 1       | 0        | 0        | 0         | 1       | 1        |
| Planctomyces       | 2              | 93             | 0       | 0       | 0       | 0       | 0       | 0       | 1       | 0        | 0        | 0       | 0        | 0        | 1       | 1       | 0        | 0        | 0         | 1       | 1        |
| Plautia            | 1              | 17             | 0       | 0       | 0       | 0       | 0       | 0       | 1       | 0        | 0        | 0       | 0        | 0        | 0       | 0       | 0        | 0        | 0         | 1       | 0        |
| Plesiomonas        | 1              | 4              | 0       | 0       | 0       | 0       | 0       | 0       | 0       | 0        | 0        | 0       | 0        | 0        | 0       | 0       | 0        | 0        | 0         | 0       | 0        |
| Pleurocapsa        | 1              | 23             | 0       | 0       | 0       | 0       | 0       | 0       | 1       | 0        | 0        | 0       | 0        | 0        | 0       | 0       | 0        | 0        | 0         | 0       | 0        |
| Polaribacter       | 2              | 74             | 1       | 0       | 0       | 0       | 0       | 1       | 0       | 1        | 0        | 0       | 0        | 0        | 0       | 1       | 0        | 0        | 0         | 1       | 1        |
| Polaromonas        | 3              | 238            | 1       | 0       | 0       | 1       | 1       | 1       | 1       | 1        | 1        | 1       | 0        | 1        | 1       | 1       | 1        | 0        | 0         | 1       | 1        |
| Polymorphum        | 3              | 173            | 1       | 0       | 0       | 1       | 0       | 0       | 1       | 1        | 1        | 0       | 0        | 0        | 1       | 1       | 0        | 0        | 0         | 1       | 1        |
| Polynucleobacter   | 1              | 19             | 0       | 0       | 0       | 0       | 0       | 0       | 0       | 0        | 0        | 0       | 0        | 0        | 0       | 0       | 0        | 0        | 0         | 0       | 0        |
| Ponticaulis        | 1              | 1              | 0       | 0       | 0       | 0       | 0       | 0       | 0       | 0        | 0        | 0       | 0        | 0        | 0       | 0       | 0        | 0        | 0         | 0       | 1        |
| Porphyromonas      | 2              | 63             | 0       | 0       | 0       | 0       | 0       | 0       | 1       | 0        | 0        | 0       | 0        | 0        | 0       | 0       | 0        | 0        | 0         | 1       | 1        |
| Prevotella         | 1              | 65             | 0       | 0       | 0       | 1       | 0       | 0       | 1       | 1        | 0        | 0       | 0        | 0        | 0       | 1       | 0        | 0        | 0         | 1       | 0        |
| Prochlorococcus    | 2              | 68             | 0       | 0       | 0       | 0       | 0       | 0       | 1       | 0        | 0        | 0       | 0        | 0        | 0       | 1       | 0        | 0        | 0         | 1       | 0        |
| Propionibacterium  | 1              | 62             | 0       | 0       | 0       | 0       | 0       | 0       | 0       | 0        | 0        | 0       | 0        | 0        | 0       | 1       | 0        | 0        | 0         | 0       | 0        |
| Prosthecochloris   | 1              | 16             | 0       | 0       | 0       | 0       | 0       | 0       | 0       | 0        | 0        | 0       | 0        | 0        | 0       | 0       | 0        | 0        | 0         | 1       | 0        |
| Proteobacteria     | 1              | 19             | 0       | 0       | 0       | 0       | 0       | 0       | 0       | 1        | 0        | 0       | 0        | 1        | 0       | 0       | 1        | 0        | 0         | 0       | 1        |
| Proteus            | 2              | 113            | 0       | 0       | 0       | 1       | 0       | 0       | 1       | 1        | 0        | 0       | 0        | 0        | 0       | 1       | 0        | 0        | 0         | 1       | 1        |
| Providencia        | 1              | 38             | 0       | 0       | 0       | 0       | 0       | 0       | 1       | 0        | 0        | 0       | 0        | 0        | 0       | 0       | 0        | 0        | 0         | 1       | 0        |
| Pseudaminobacter   | 1              | 10             | 0       | 0       | 0       | 0       | 0       | 0       | 0       | 0        | 0        | 0       | 0        | 0        | 0       | 1       | 0        | 0        | 0         | 0       | 0        |
| Pseudanabaena      | 1              | 11             | 0       | 0       | 0       | 0       | 0       | 0       | 0       | 0        | 0        | 0       | 0        | 0        | 0       | 0       | 0        | 0        | 0         | 0       | 0        |
| Pseudoalteromonas  | 2              | 188            | 1       | 1       | 0       | 1       | 0       | 1       | 1       | 1        | 0        | 0       | 0        | 0        | 0       | 1       | 1        | 0        | 0         | 1       | 1        |
| Pseudochrobactrum  | 1              | 7              | 0       | 0       | 0       | 0       | 0       | 0       | 0       | 0        | 0        | 0       | 0        | 0        | 0       | 0       | 0        | 0        | 0         | 0       | 0        |
| Pseudogulbenkiania | 1              | 40             | 0       | 0       | 0       | 0       | 0       | 0       | 0       | 1        | 0        | 0       | 0        | 0        | 0       | 0       | 0        | 0        | 0         | 0       | 0        |
| pseudomallei       | 3              | 131            | 0       | 0       | 0       | 1       | 0       | 0       | 1       | 1        | 0        | 0       | 0        | 0        | 0       | 0       | 0        | 0        | 0         | 1       | 1        |

| Genus                   | Cluster Number | Protein Counts | 3.7.1.2 | 3.7.1.9 | 3.8.1.- | 3.8.1.2 | 3.8.1.3 | 3.8.1.5 | 4.1.1.- | 4.1.1.44 | 4.1.1.55 | 4.1.1.7 | 4.1.1.70 | 4.1.1.77 | 4.1.2.- | 4.1.3.- | 4.1.3.39 | 4.1.99.- | 4.1.99.11 | 4.2.1.- | 4.2.1.17 |
|-------------------------|----------------|----------------|---------|---------|---------|---------|---------|---------|---------|----------|----------|---------|----------|----------|---------|---------|----------|----------|-----------|---------|----------|
| Pseudomonas             | 3              | 381            | 1       | 1       | 0       | 1       | 1       | 1       | 1       | 1        | 0        | 1       | 0        | 1        | 1       | 1       | 1        | 0        | 0         | 1       | 1        |
| Pseudonocardia          | 3              | 180            | 1       | 0       | 0       | 0       | 0       | 0       | 1       | 1        | 0        | 0       | 0        | 1        | 1       | 1       | 0        | 0        | 0         | 1       | 1        |
| Pseudorhodobacter       | 1              | 4              | 0       | 0       | 0       | 0       | 0       | 0       | 0       | 0        | 0        | 0       | 0        | 0        | 0       | 1       | 0        | 0        | 0         | 0       | 0        |
| Pseudovibrio            | 1              | 33             | 0       | 0       | 0       | 0       | 0       | 0       | 0       | 0        | 0        | 0       | 0        | 0        | 0       | 0       | 0        | 0        | 0         | 0       | 0        |
| Pseudoxanthomonas       | 2              | 124            | 0       | 0       | 0       | 1       | 0       | 0       | 0       | 1        | 0        | 0       | 0        | 1        | 0       | 1       | 1        | 0        | 0         | 1       | 1        |
| Psychrobacter           | 2              | 124            | 1       | 0       | 0       | 1       | 0       | 1       | 1       | 1        | 0        | 0       | 0        | 0        | 0       | 1       | 0        | 0        | 0         | 1       | 1        |
| Psychroflexus           | 1              | 22             | 0       | 0       | 0       | 0       | 0       | 0       | 0       | 0        | 0        | 0       | 0        | 0        | 0       | 0       | 0        | 0        | 0         | 0       | 0        |
| Psychromonas            | 2              | 110            | 0       | 0       | 0       | 1       | 0       | 0       | 1       | 0        | 0        | 0       | 0        | 0        | 0       | 1       | 0        | 0        | 0         | 1       | 1        |
| Pusillimonas            | 3              | 111            | 1       | 0       | 0       | 1       | 1       | 0       | 1       | 1        | 0        | 0       | 0        | 0        | 1       | 1       | 0        | 0        | 0         | 1       | 1        |
| Pyrobaculum             | 1              | 15             | 0       | 0       | 0       | 0       | 0       | 0       | 0       | 0        | 0        | 0       | 0        | 0        | 0       | 0       | 0        | 0        | 0         | 0       | 0        |
| Pyrococcus              | 1              | 10             | 0       | 0       | 0       | 0       | 0       | 0       | 0       | 0        | 0        | 0       | 0        | 0        | 0       | 0       | 0        | 0        | 0         | 0       | 0        |
| Pyrolobus               | 1              | 4              | 0       | 0       | 0       | 0       | 0       | 0       | 0       | 0        | 0        | 0       | 0        | 0        | 0       | 0       | 0        | 0        | 0         | 0       | 0        |
| Rahnella                | 2              | 143            | 0       | 0       | 0       | 1       | 0       | 0       | 1       | 1        | 1        | 0       | 0        | 0        | 0       | 1       | 0        | 0        | 0         | 1       | 1        |
| Ralstonia               | 3              | 332            | 1       | 1       | 0       | 1       | 1       | 1       | 1       | 1        | 1        | 1       | 0        | 1        | 1       | 1       | 1        | 0        | 0         | 1       | 1        |
| Ramlibacter             | 1              | 35             | 0       | 0       | 0       | 0       | 0       | 0       | 0       | 0        | 0        | 0       | 0        | 0        | 0       | 0       | 0        | 0        | 0         | 0       | 0        |
| Raoultella              | 2              | 139            | 0       | 0       | 0       | 0       | 0       | 0       | 1       | 1        | 0        | 0       | 0        | 0        | 1       | 1       | 0        | 0        | 0         | 1       | 1        |
| Raphidiopsis            | 1              | 5              | 0       | 0       | 0       | 0       | 0       | 0       | 1       | 0        | 0        | 0       | 0        | 0        | 0       | 0       | 0        | 0        | 0         | 0       | 0        |
| Reinekea                | 1              | 2              | 0       | 0       | 0       | 0       | 0       | 0       | 0       | 0        | 0        | 0       | 0        | 0        | 0       | 0       | 0        | 0        | 0         | 0       | 0        |
| Renibacterium           | 2              | 67             | 0       | 0       | 0       | 1       | 0       | 0       | 0       | 1        | 0        | 0       | 0        | 0        | 0       | 1       | 0        | 0        | 0         | 1       | 1        |
| Rhizobiaceae            | 1              | 3              | 0       | 0       | 0       | 0       | 0       | 0       | 0       | 0        | 0        | 0       | 0        | 0        | 0       | 0       | 0        | 0        | 0         | 1       | 0        |
| Rhizobiales             | 1              | 6              | 0       | 0       | 0       | 0       | 0       | 0       | 0       | 0        | 0        | 0       | 0        | 0        | 0       | 0       | 0        | 0        | 0         | 0       | 0        |
| Rhizobium               | 3              | 257            | 1       | 0       | 0       | 1       | 0       | 1       | 1       | 1        | 1        | 0       | 0        | 0        | 1       | 1       | 0        | 0        | 0         | 1       | 1        |
| Rhizobium/Agrobacterium | 2              | 87             | 0       | 0       | 0       | 1       | 0       | 1       | 0       | 0        | 0        | 0       | 0        | 0        | 1       | 1       | 0        | 0        | 0         | 1       | 1        |
| Rhodanobacter           | 1              | 21             | 0       | 0       | 0       | 0       | 0       | 0       | 0       | 0        | 0        | 0       | 0        | 0        | 0       | 0       | 0        | 0        | 0         | 0       | 0        |
| Rhodobacter             | 3              | 175            | 1       | 0       | 0       | 1       | 1       | 1       | 1       | 1        | 0        | 0       | 0        | 0        | 1       | 1       | 0        | 0        | 0         | 1       | 1        |
| Rhodobacteraceae        | 1              | 21             | 0       | 0       | 0       | 0       | 0       | 0       | 0       | 0        | 0        | 0       | 0        | 0        | 0       | 1       | 0        | 0        | 0         | 0       | 1        |
| Rhodobacterales         | 1              | 34             | 0       | 0       | 0       | 0       | 0       | 0       | 0       | 0        | 0        | 0       | 0        | 0        | 0       | 1       | 0        | 0        | 0         | 0       | 1        |
| Rhodococcus             | 2              | 292            | 1       | 1       | 0       | 0       | 0       | 1       | 0       | 1        | 1        | 1       | 0        | 1        | 1       | 1       | 1        | 0        | 0         | 1       | 1        |
| Rhodocyclaceae          | 1              | 7              | 0       | 0       | 0       | 0       | 0       | 0       | 0       | 0        | 0        | 0       | 0        | 0        | 0       | 0       | 0        | 0        | 0         | 0       | 0        |
| Rhodoferax              | 3              | 144            | 1       | 0       | 0       | 1       | 0       | 1       | 1       | 1        | 0        | 0       | 0        | 0        | 1       | 1       | 1        | 0        | 0         | 1       | 1        |
| Rhodomicrobium          | 2              | 103            | 0       | 0       | 0       | 0       | 0       | 0       | 0       | 1        | 0        | 0       | 0        | 0        | 0       | 1       | 0        | 0        | 0         | 1       | 1        |
| Rhodopirellula          | 2              | 87             | 0       | 0       | 0       | 0       | 0       | 0       | 1       | 0        | 0        | 0       | 0        | 0        | 0       | 1       | 0        | 0        | 0         | 1       | 1        |
| Rhodopseudomonas        | 3              | 246            | 1       | 0       | 0       | 1       | 1       | 1       | 1       | 1        | 0        | 1       | 0        | 0        | 1       | 1       | 0        | 0        | 0         | 1       | 1        |
| Rhodospirillum          | 2              | 121            | 1       | 0       | 0       | 0       | 0       | 1       | 1       | 0        | 0        | 0       | 0        | 0        | 0       | 1       | 0        | 0        | 0         | 1       | 1        |
| Rhodothermus            | 2              | 76             | 0       | 0       | 0       | 1       | 0       | 0       | 0       | 0        | 0        | 0       | 0        | 0        | 0       | 1       | 0        | 0        | 0         | 0       | 1        |
| Rhodovulum              | 1              | 4              | 0       | 0       | 0       | 0       | 0       | 0       | 0       | 0        | 0        | 0       | 0        | 0        | 0       | 0       | 0        | 0        | 0         | 0       | 0        |
| Richelia                | 1              | 2              | 0       | 0       | 0       | 0       | 0       | 0       | 0       | 0        | 0        | 0       | 0        | 0        | 0       | 0       | 0        | 0        | 0         | 0       | 0        |
| Rickettsia              | 2              | 43             | 0       | 0       | 0       | 0       | 0       | 0       | 1       | 0        | 0        | 0       | 0        | 0        | 0       | 0       | 0        | 1        | 0         | 1       | 1        |
| Rickettsiaceae          | 1              | 5              | 0       | 0       | 0       | 0       | 0       | 0       | 0       | 0        | 0        | 0       | 0        | 0        | 0       | 0       | 0        | 0        | 0         | 0       | 0        |
| Riemerella              | 2              | 61             | 1       | 0       | 0       | 1       | 0       | 0       | 0       | 0        | 0        | 0       | 0        | 0        | 0       | 0       | 0        | 0        | 0         | 1       | 1        |
| Rivularia               | 1              | 18             | 0       | 0       | 0       | 0       | 0       | 0       | 1       | 0        | 0        | 0       | 0        | 0        | 0       | 0       | 0        | 0        | 0         | 0       | 0        |
| Robiginitalea           | 2              | 83             | 1       | 0       | 0       | 0       | 0       | 0       | 0       | 1        | 0        | 0       | 0        | 0        | 0       | 1       | 0        | 0        | 0         | 1       | 1        |
| Roseburia               | 2              | 58             | 0       | 0       | 0       | 0       | 0       | 0       | 1       | 1        | 0        | 0       | 0        | 0        | 1       | 1       | 0        | 0        | 0         | 1       | 0        |
| Roseibium               | 1              | 3              | 0       | 0       | 0       | 0       | 0       | 0       | 0       | 0        | 0        | 0       | 0        | 0        | 0       | 0       | 0        | 0        | 0         | 0       | 0        |
| Roseiflexus             | 3              | 100            | 0       | 1       | 0       | 1       | 0       | 1       | 0       | 0        | 0        | 0       | 0        | 1        | 1       | 1       | 1        | 0        | 0         | 1       | 1        |
| Roseobacter             | 2              | 149            | 1       | 0       | 0       | 1       | 0       | 0       | 0       | 1        | 0        | 0       | 0        | 0        | 1       | 1       | 0        | 0        | 0         | 1       | 1        |
| Roseomonas              | 1              | 2              | 0       | 0       | 0       | 0       | 0       | 0       | 0       | 0        | 0        | 0       | 0        | 0        | 0       | 0       | 0        | 0        | 0         | 0       | 0        |
| Roseovarius             | 1              | 15             | 0       | 0       | 0       | 0       | 0       | 0       | 0       | 0        | 0        | 0       | 0        | 0        | 0       | 1       | 0        | 0        | 0         | 1       | 0        |
| Rothia                  | 1              | 44             | 0       | 0       | 0       | 0       | 0       | 0       | 0       | 1        | 0        | 0       | 0        | 0        | 0       | 0       | 0        | 0        | 0         | 1       | 1        |
| Rubrivivax              | 1              | 24             | 0       | 0       | 0       | 0       | 0       | 0       | 0       | 0        | 0        | 0       | 0        | 0        | 0       | 0       | 0        | 0        | 0         | 0       | 0        |
| Rubrobacter             | 3              | 117            | 1       | 0       | 0       | 1       | 0       | 0       | 0       | 1        | 0        | 1       | 0        | 0        | 0       | 1       | 0        | 0        | 0         | 1       | 1        |
| Ruegeria                | 2              | 189            | 1       | 0       | 0       | 1       | 0       | 0       | 0       | 1        | 0        | 0       | 0        | 0        | 1       | 1       | 0        | 0        | 0         | 1       | 1        |

| Genus             | Cluster Number | Protein Counts | 3.7.1.2 | 3.7.1.9 | 3.8.1.- | 3.8.1.2 | 3.8.1.3 | 3.8.1.5 | 4.1.1.- | 4.1.1.44 | 4.1.1.55 | 4.1.1.7 | 4.1.1.70 | 4.1.1.77 | 4.1.2.- | 4.1.3.- | 4.1.3.39 | 4.1.99.- | 4.1.99.11 | 4.2.1.- | 4.2.1.17 |
|-------------------|----------------|----------------|---------|---------|---------|---------|---------|---------|---------|----------|----------|---------|----------|----------|---------|---------|----------|----------|-----------|---------|----------|
| Ruminococcaceae   | 1              | 2              | 0       | 0       | 0       | 0       | 0       | 0       | 0       | 0        | 0        | 0       | 0        | 0        | 0       | 0       | 0        | 0        | 0         | 0       | 0        |
| Ruminococcus      | 2              | 101            | 0       | 0       | 0       | 1       | 0       | 0       | 1       | 1        | 0        | 0       | 0        | 0        | 1       | 1       | 0        | 0        | 0         | 1       | 1        |
| Runella           | 1              | 26             | 0       | 0       | 0       | 0       | 0       | 0       | 0       | 0        | 0        | 0       | 0        | 0        | 0       | 0       | 0        | 0        | 0         | 0       | 0        |
| Saccharomonospora | 2              | 132            | 1       | 0       | 0       | 1       | 0       | 0       | 0       | 1        | 0        | 0       | 0        | 0        | 0       | 1       | 0        | 0        | 0         | 1       | 1        |
| Saccharophagus    | 2              | 81             | 0       | 0       | 0       | 0       | 0       | 0       | 1       | 0        | 0        | 0       | 0        | 0        | 0       | 1       | 0        | 0        | 0         | 1       | 1        |
| Saccharopolyspora | 3              | 194            | 1       | 0       | 0       | 1       | 0       | 1       | 1       | 1        | 0        | 1       | 0        | 0        | 1       | 1       | 0        | 0        | 0         | 1       | 1        |
| Saccharothrix     | 1              | 32             | 0       | 0       | 0       | 0       | 0       | 0       | 0       | 0        | 0        | 0       | 0        | 0        | 0       | 0       | 0        | 0        | 0         | 0       | 0        |
| Sagittula         | 1              | 10             | 0       | 0       | 0       | 0       | 0       | 0       | 0       | 0        | 0        | 0       | 0        | 0        | 0       | 0       | 0        | 0        | 0         | 0       | 0        |
| Salinibacter      | 2              | 77             | 1       | 0       | 0       | 1       | 0       | 0       | 0       | 0        | 0        | 0       | 0        | 0        | 0       | 1       | 0        | 0        | 0         | 0       | 1        |
| Salinimonas       | 1              | 1              | 0       | 0       | 0       | 0       | 0       | 0       | 0       | 0        | 0        | 0       | 0        | 0        | 0       | 0       | 0        | 0        | 0         | 0       | 0        |
| Salinispora       | 3              | 127            | 1       | 0       | 0       | 1       | 0       | 0       | 1       | 0        | 0        | 0       | 0        | 1        | 0       | 1       | 1        | 0        | 0         | 1       | 1        |
| Salinivibrio      | 1              | 2              | 0       | 0       | 0       | 0       | 0       | 0       | 0       | 0        | 0        | 0       | 0        | 0        | 0       | 0       | 0        | 0        | 0         | 0       | 0        |
| Salmonella        | 2              | 151            | 1       | 0       | 0       | 1       | 0       | 0       | 1       | 0        | 0        | 0       | 0        | 0        | 1       | 1       | 0        | 0        | 0         | 1       | 1        |
| Sanguibacter      | 2              | 73             | 0       | 0       | 0       | 1       | 0       | 1       | 0       | 1        | 0        | 0       | 0        | 0        | 0       | 1       | 0        | 0        | 0         | 0       | 0        |
| Saprospira        | 1              | 13             | 0       | 0       | 0       | 0       | 0       | 0       | 0       | 0        | 0        | 0       | 0        | 0        | 0       | 0       | 0        | 0        | 0         | 0       | 0        |
| Scardovia         | 1              | 1              | 0       | 0       | 0       | 0       | 0       | 0       | 0       | 0        | 0        | 0       | 0        | 0        | 0       | 0       | 0        | 0        | 0         | 0       | 0        |
| Scytonema         | 1              | 10             | 0       | 0       | 0       | 0       | 0       | 0       | 1       | 0        | 0        | 0       | 0        | 0        | 0       | 0       | 0        | 0        | 0         | 0       | 0        |
| Sebaldella        | 2              | 69             | 0       | 0       | 0       | 0       | 0       | 0       | 0       | 1        | 0        | 0       | 0        | 0        | 0       | 1       | 0        | 1        | 0         | 1       | 0        |
| Segniliparus      | 2              | 85             | 1       | 0       | 0       | 0       | 0       | 1       | 1       | 1        | 0        | 0       | 0        | 0        | 0       | 1       | 0        | 0        | 0         | 0       | 1        |
| Selenomonas       | 2              | 57             | 0       | 0       | 0       | 0       | 0       | 0       | 1       | 0        | 0        | 0       | 0        | 0        | 0       | 1       | 0        | 0        | 0         | 1       | 0        |
| Serinicoccus      | 1              | 1              | 0       | 0       | 0       | 0       | 0       | 0       | 0       | 0        | 0        | 0       | 0        | 0        | 0       | 0       | 0        | 0        | 0         | 0       | 0        |
| Serratia          | 2              | 186            | 1       | 0       | 0       | 1       | 0       | 0       | 1       | 1        | 0        | 0       | 0        | 0        | 1       | 1       | 0        | 0        | 0         | 1       | 1        |
| Shewanella        | 3              | 214            | 0       | 1       | 0       | 1       | 0       | 1       | 1       | 1        | 0        | 0       | 0        | 1        | 0       | 1       | 1        | 0        | 0         | 1       | 1        |
| Shigella          | 2              | 172            | 1       | 0       | 0       | 1       | 0       | 0       | 1       | 1        | 0        | 0       | 0        | 0        | 1       | 1       | 1        | 0        | 0         | 1       | 1        |
| Shinella          | 1              | 2              | 0       | 0       | 0       | 0       | 0       | 0       | 0       | 0        | 0        | 0       | 0        | 0        | 0       | 0       | 0        | 0        | 0         | 0       | 0        |
| Sideroxydans      | 2              | 81             | 0       | 0       | 0       | 0       | 0       | 0       | 1       | 1        | 0        | 0       | 0        | 0        | 0       | 1       | 0        | 0        | 0         | 1       | 1        |
| Silicibacter      | 2              | 105            | 1       | 0       | 0       | 1       | 0       | 0       | 0       | 1        | 0        | 0       | 0        | 0        | 1       | 1       | 0        | 0        | 0         | 1       | 1        |
| Simiduia          | 1              | 18             | 0       | 0       | 0       | 0       | 0       | 0       | 0       | 0        | 0        | 0       | 0        | 0        | 0       | 0       | 0        | 0        | 0         | 0       | 0        |
| Simkania          | 1              | 6              | 0       | 0       | 0       | 0       | 0       | 0       | 0       | 0        | 0        | 0       | 0        | 0        | 0       | 0       | 0        | 0        | 0         | 0       | 0        |
| Simonsiella       | 1              | 2              | 0       | 0       | 0       | 0       | 0       | 0       | 0       | 0        | 0        | 0       | 0        | 0        | 0       | 0       | 0        | 0        | 0         | 0       | 0        |
| Singulisphaera    | 1              | 18             | 0       | 0       | 0       | 0       | 0       | 0       | 0       | 0        | 0        | 0       | 0        | 0        | 0       | 0       | 0        | 0        | 0         | 0       | 0        |
| Sinorhizobium     | 3              | 207            | 1       | 1       | 0       | 1       | 0       | 1       | 1       | 1        | 0        | 0       | 0        | 0        | 1       | 1       | 0        | 0        | 0         | 1       | 1        |
| Slackia           | 2              | 46             | 0       | 1       | 0       | 0       | 0       | 0       | 0       | 1        | 0        | 0       | 0        | 0        | 0       | 1       | 0        | 0        | 0         | 1       | 0        |
| Smaragdicoccus    | 1              | 3              | 0       | 0       | 0       | 0       | 0       | 0       | 0       | 0        | 0        | 0       | 0        | 0        | 0       | 0       | 0        | 0        | 0         | 0       | 0        |
| Sodalis           | 2              | 71             | 0       | 0       | 0       | 1       | 0       | 0       | 1       | 0        | 0        | 0       | 0        | 0        | 0       | 1       | 0        | 0        | 0         | 1       | 0        |
| Solibacillus      | 1              | 23             | 0       | 0       | 0       | 0       | 0       | 0       | 0       | 0        | 0        | 0       | 0        | 0        | 0       | 0       | 0        | 0        | 0         | 0       | 0        |
| Solitaea          | 1              | 13             | 0       | 0       | 0       | 0       | 0       | 0       | 0       | 0        | 0        | 0       | 0        | 0        | 0       | 0       | 0        | 0        | 0         | 0       | 0        |
| Sorangium         | 3              | 115            | 1       | 0       | 0       | 1       | 0       | 1       | 0       | 1        | 0        | 0       | 0        | 0        | 0       | 1       | 0        | 0        | 0         | 1       | 1        |
| Sphaerobacter     | 2              | 100            | 0       | 0       | 0       | 1       | 0       | 0       | 1       | 1        | 0        | 0       | 0        | 0        | 0       | 1       | 0        | 0        | 0         | 1       | 1        |
| Sphaerochaeta     | 1              | 42             | 0       | 0       | 0       | 0       | 0       | 0       | 0       | 0        | 0        | 0       | 0        | 0        | 0       | 1       | 0        | 0        | 0         | 1       | 0        |
| Sphingobacterium  | 3              | 85             | 0       | 0       | 0       | 1       | 0       | 1       | 1       | 1        | 0        | 0       | 0        | 0        | 0       | 1       | 0        | 0        | 0         | 1       | 1        |
| Sphingobium       | 1              | 179            | 1       | 0       | 0       | 0       | 0       | 1       | 1       | 0        | 0        | 0       | 0        | 1        | 0       | 1       | 1        | 0        | 0         | 1       | 1        |
| Sphingomonadaceae | 1              | 15             | 0       | 0       | 0       | 0       | 0       | 0       | 0       | 0        | 0        | 0       | 0        | 0        | 0       | 0       | 0        | 0        | 0         | 0       | 0        |
| Sphingomonas      | 2              | 220            | 1       | 1       | 0       | 0       | 0       | 0       | 1       | 1        | 0        | 1       | 0        | 1        | 1       | 1       | 1        | 0        | 0         | 1       | 1        |
| Sphingopyxis      | 3              | 99             | 1       | 0       | 0       | 0       | 0       | 1       | 1       | 0        | 0        | 0       | 0        | 0        | 0       | 1       | 0        | 0        | 0         | 1       | 1        |
| Spirochaeta       | 2              | 103            | 0       | 0       | 0       | 1       | 0       | 1       | 1       | 1        | 0        | 0       | 0        | 0        | 0       | 1       | 0        | 1        | 0         | 1       | 1        |
| Spiroplasma       | 1              | 6              | 0       | 0       | 0       | 0       | 0       | 0       | 0       | 0        | 0        | 0       | 0        | 0        | 0       | 0       | 0        | 0        | 0         | 0       | 0        |
| Spirosoma         | 2              | 107            | 1       | 0       | 0       | 1       | 0       | 0       | 0       | 0        | 0        | 0       | 0        | 0        | 1       | 1       | 0        | 1        | 0         | 1       | 1        |
| Stackebrandtia    | 2              | 110            | 1       | 0       | 0       | 0       | 0       | 0       | 0       | 1        | 0        | 0       | 0        | 0        | 0       | 1       | 0        | 0        | 0         | 1       | 1        |
| Stanieria         | 1              | 17             | 0       | 0       | 0       | 0       | 0       | 0       | 1       | 0        | 0        | 0       | 0        | 0        | 0       | 0       | 0        | 0        | 0         | 0       | 0        |
| Staphylococcus    | 2              | 108            | 0       | 0       | 0       | 1       | 0       | 0       | 1       | 1        | 0        | 0       | 0        | 0        | 0       | 1       | 0        | 0        | 0         | 1       | 1        |
| Staphylothermus   | 1              | 12             | 0       | 0       | 0       | 0       | 0       | 0       | 0       | 0        | 0        | 0       | 0        | 0        | 0       | 0       | 0        | 0        | 0         | 0       | 0        |

| Genus                  | Cluster Number | Protein Counts | 3.7.1.2 | 3.7.1.9 | 3.8.1.- | 3.8.1.2 | 3.8.1.3 | 3.8.1.5 | 4.1.1.- | 4.1.1.44 | 4.1.1.55 | 4.1.1.7 | 4.1.1.70 | 4.1.1.77 | 4.1.2.- | 4.1.3.- | 4.1.3.39 | 4.1.99.- | 4.1.99.11 | 4.2.1.- | 4.2.1.17 |
|------------------------|----------------|----------------|---------|---------|---------|---------|---------|---------|---------|----------|----------|---------|----------|----------|---------|---------|----------|----------|-----------|---------|----------|
| Stappia                | 1              | 2              | 0       | 0       | 0       | 0       | 0       | 0       | 0       | 0        | 0        | 0       | 0        | 0        | 0       | 0       | 0        | 0        | 0         | 0       | 0        |
| Starkeya               | 3              | 134            | 0       | 0       | 0       | 0       | 1       | 0       | 1       | 1        | 0        | 0       | 0        | 0        | 1       | 1       | 0        | 0        | 0         | 1       | 1        |
| Stenotrophomonas       | 3              | 104            | 0       | 1       | 0       | 1       | 0       | 1       | 0       | 1        | 0        | 0       | 0        | 0        | 0       | 1       | 0        | 0        | 0         | 1       | 1        |
| Stigmatella            | 3              | 129            | 0       | 0       | 0       | 1       | 0       | 0       | 0       | 1        | 0        | 0       | 0        | 1        | 0       | 1       | 0        | 1        | 0         | 1       | 1        |
| Streptobacillus        | 1              | 38             | 0       | 0       | 0       | 1       | 0       | 0       | 0       | 0        | 0        | 0       | 0        | 0        | 0       | 0       | 0        | 0        | 0         | 0       | 0        |
| Streptococcus          | 2              | 121            | 0       | 0       | 0       | 1       | 0       | 1       | 1       | 1        | 0        | 0       | 0        | 0        | 0       | 1       | 0        | 0        | 0         | 1       | 1        |
| Streptomyces           | 2              | 253            | 1       | 0       | 0       | 1       | 1       | 1       | 1       | 1        | 1        | 1       | 0        | 1        | 1       | 1       | 1        | 1        | 0         | 1       | 1        |
| Streptosporangium      | 3              | 148            | 1       | 1       | 0       | 1       | 0       | 0       | 0       | 1        | 0        | 0       | 0        | 1        | 0       | 1       | 1        | 0        | 0         | 1       | 1        |
| Strigomonas            | 1              | 2              | 0       | 0       | 0       | 0       | 0       | 0       | 0       | 0        | 0        | 0       | 0        | 0        | 0       | 0       | 0        | 0        | 0         | 0       | 0        |
| Sulfitobacter          | 1              | 10             | 0       | 0       | 0       | 0       | 0       | 0       | 0       | 0        | 0        | 0       | 0        | 0        | 0       | 0       | 0        | 0        | 0         | 0       | 0        |
| Sulfobacillus          | 1              | 30             | 0       | 0       | 0       | 0       | 0       | 0       | 0       | 0        | 0        | 0       | 0        | 0        | 0       | 0       | 0        | 0        | 0         | 0       | 0        |
| Sulfolobus             | 1              | 23             | 0       | 0       | 0       | 0       | 0       | 0       | 0       | 0        | 0        | 0       | 0        | 0        | 0       | 0       | 0        | 0        | 0         | 0       | 0        |
| Sulfuricurvum          | 2              | 67             | 0       | 0       | 0       | 0       | 0       | 0       | 1       | 0        | 0        | 0       | 0        | 0        | 0       | 1       | 0        | 1        | 0         | 1       | 0        |
| Sulfurihydrogenibium   | 2              | 55             | 0       | 0       | 0       | 0       | 0       | 0       | 1       | 0        | 0        | 0       | 0        | 0        | 0       | 1       | 0        | 0        | 0         | 1       | 0        |
| Sulfurimonas           | 2              | 60             | 0       | 0       | 0       | 0       | 0       | 0       | 1       | 0        | 0        | 0       | 0        | 0        | 0       | 1       | 0        | 1        | 0         | 1       | 0        |
| Sulfurospirillum       | 1              | 48             | 0       | 0       | 0       | 0       | 0       | 0       | 0       | 0        | 0        | 0       | 0        | 0        | 0       | 1       | 0        | 1        | 0         | 1       | 0        |
| Sulfurovum             | 2              | 48             | 0       | 0       | 0       | 0       | 0       | 0       | 0       | 1        | 0        | 0       | 0        | 0        | 0       | 1       | 1        | 0        | 0         | 1       | 0        |
| Symbiobacterium        | 2              | 68             | 0       | 0       | 0       | 1       | 0       | 1       | 0       | 0        | 0        | 0       | 0        | 0        | 0       | 1       | 0        | 0        | 0         | 1       | 1        |
| Synechococcus          | 1              | 34             | 0       | 0       | 0       | 0       | 0       | 0       | 0       | 0        | 0        | 0       | 0        | 0        | 0       | 0       | 0        | 0        | 0         | 1       | 0        |
| Synechocystis          | 1              | 40             | 0       | 0       | 0       | 1       | 0       | 0       | 1       | 0        | 0        | 0       | 0        | 0        | 0       | 0       | 0        | 1        | 0         | 1       | 1        |
| Synergistetes          | 1              | 27             | 0       | 0       | 0       | 0       | 0       | 1       | 0       | 1        | 0        | 0       | 0        | 0        | 0       | 0       | 0        | 0        | 0         | 1       | 0        |
| Syntrophobacter        | 2              | 101            | 0       | 0       | 0       | 0       | 0       | 0       | 1       | 1        | 0        | 0       | 0        | 0        | 0       | 1       | 0        | 1        | 0         | 1       | 1        |
| Syntrophobotulus       | 2              | 71             | 0       | 0       | 0       | 0       | 0       | 0       | 1       | 0        | 0        | 0       | 0        | 0        | 0       | 1       | 0        | 1        | 0         | 1       | 0        |
| Syntrophomonas         | 2              | 58             | 0       | 0       | 0       | 0       | 0       | 0       | 1       | 1        | 0        | 0       | 0        | 0        | 0       | 1       | 0        | 1        | 0         | 1       | 1        |
| Syntrophothermus       | 2              | 60             | 0       | 0       | 0       | 1       | 0       | 0       | 1       | 1        | 0        | 0       | 0        | 0        | 0       | 1       | 0        | 0        | 0         | 1       | 1        |
| Syntrophus             | 2              | 66             | 0       | 0       | 0       | 0       | 0       | 0       | 0       | 1        | 0        | 0       | 0        | 0        | 0       | 1       | 0        | 0        | 0         | 1       | 1        |
| Tannerella             | 1              | 8              | 0       | 0       | 0       | 0       | 0       | 0       | 0       | 0        | 0        | 0       | 0        | 0        | 0       | 0       | 0        | 0        | 0         | 0       | 0        |
| Taylorella             | 1              | 43             | 0       | 0       | 0       | 0       | 0       | 1       | 1       | 0        | 0        | 0       | 0        | 0        | 0       | 0       | 0        | 0        | 0         | 1       | 0        |
| Tepidanaerobacter      | 2              | 55             | 0       | 0       | 0       | 0       | 0       | 0       | 0       | 0        | 0        | 0       | 0        | 0        | 0       | 1       | 0        | 0        | 0         | 1       | 1        |
| Teredinibacter         | 2              | 109            | 0       | 1       | 0       | 0       | 0       | 0       | 1       | 1        | 0        | 0       | 0        | 0        | 0       | 1       | 0        | 0        | 0         | 1       | 1        |
| Terrabacter            | 1              | 1              | 0       | 0       | 0       | 0       | 0       | 0       | 0       | 0        | 0        | 0       | 0        | 0        | 0       | 0       | 0        | 0        | 0         | 0       | 0        |
| Terriglobus            | 2              | 83             | 0       | 0       | 0       | 0       | 0       | 0       | 1       | 1        | 0        | 0       | 0        | 0        | 1       | 1       | 0        | 0        | 0         | 1       | 0        |
| Tetragenococcus        | 1              | 12             | 0       | 0       | 0       | 0       | 0       | 0       | 0       | 0        | 0        | 0       | 0        | 0        | 0       | 0       | 0        | 0        | 0         | 0       | 0        |
| Thalassiobium          | 1              | 11             | 0       | 0       | 0       | 0       | 0       | 0       | 0       | 0        | 0        | 0       | 0        | 0        | 0       | 0       | 0        | 0        | 0         | 0       | 0        |
| Thalassobacter         | 1              | 9              | 1       | 0       | 0       | 0       | 0       | 0       | 0       | 0        | 0        | 0       | 0        | 0        | 0       | 0       | 0        | 0        | 0         | 0       | 0        |
| Thalassolituus         | 1              | 12             | 0       | 0       | 0       | 0       | 0       | 0       | 0       | 0        | 0        | 0       | 0        | 0        | 0       | 0       | 0        | 0        | 0         | 0       | 0        |
| Thalassospira          | 1              | 2              | 0       | 0       | 0       | 0       | 0       | 0       | 0       | 0        | 0        | 0       | 0        | 0        | 0       | 0       | 0        | 0        | 0         | 0       | 0        |
| Thauera                | 1              | 111            | 0       | 1       | 0       | 0       | 0       | 0       | 1       | 0        | 0        | 0       | 0        | 1        | 0       | 1       | 1        | 0        | 0         | 1       | 1        |
| Thermacetogenium       | 1              | 7              | 0       | 0       | 0       | 0       | 0       | 0       | 0       | 0        | 0        | 0       | 0        | 0        | 0       | 0       | 0        | 0        | 0         | 0       | 0        |
| Thermaerobacter        | 2              | 79             | 1       | 0       | 0       | 0       | 0       | 0       | 0       | 0        | 0        | 0       | 0        | 1        | 0       | 1       | 0        | 0        | 0         | 1       | 1        |
| Thermanaerovibrio      | 2              | 58             | 0       | 0       | 0       | 0       | 0       | 1       | 1       | 0        | 0        | 0       | 0        | 0        | 0       | 1       | 0        | 0        | 0         | 1       | 0        |
| Thermincola            | 2              | 62             | 0       | 0       | 0       | 0       | 0       | 0       | 1       | 1        | 0        | 0       | 0        | 0        | 0       | 1       | 0        | 1        | 0         | 1       | 0        |
| Thermoanaerobacter     | 2              | 76             | 0       | 0       | 0       | 0       | 0       | 0       | 0       | 1        | 0        | 0       | 0        | 0        | 0       | 1       | 0        | 1        | 0         | 1       | 0        |
| Thermoanaerobacterium  | 2              | 64             | 0       | 0       | 0       | 0       | 0       | 0       | 1       | 1        | 0        | 0       | 0        | 0        | 0       | 1       | 0        | 1        | 0         | 1       | 0        |
| Thermobacillus         | 1              | 11             | 0       | 0       | 0       | 0       | 0       | 0       | 0       | 0        | 0        | 0       | 0        | 0        | 0       | 0       | 0        | 0        | 0         | 0       | 0        |
| Thermobaculum          | 2              | 62             | 0       | 0       | 0       | 1       | 0       | 1       | 0       | 0        | 0        | 0       | 0        | 0        | 0       | 1       | 0        | 0        | 0         | 1       | 1        |
| Thermobifida           | 2              | 72             | 0       | 0       | 0       | 1       | 0       | 1       | 0       | 0        | 0        | 0       | 0        | 0        | 0       | 1       | 0        | 0        | 0         | 1       | 1        |
| Thermobispora          | 2              | 109            | 1       | 0       | 0       | 0       | 0       | 0       | 0       | 1        | 0        | 1       | 0        | 0        | 0       | 1       | 0        | 0        | 0         | 1       | 1        |
| Thermococcus           | 1              | 13             | 0       | 0       | 0       | 0       | 0       | 0       | 0       | 0        | 0        | 0       | 0        | 0        | 0       | 0       | 0        | 0        | 0         | 0       | 0        |
| Thermocrinis           | 2              | 60             | 0       | 0       | 0       | 1       | 0       | 0       | 1       | 0        | 0        | 0       | 0        | 0        | 0       | 1       | 0        | 0        | 0         | 1       | 0        |
| Thermodesulfator       | 1              | 10             | 0       | 0       | 0       | 0       | 0       | 0       | 0       | 0        | 0        | 0       | 0        | 0        | 0       | 0       | 0        | 0        | 0         | 0       | 0        |
| Thermodesulfobacterium | 1              | 9              | 0       | 0       | 0       | 0       | 0       | 0       | 0       | 0        | 0        | 0       | 0        | 0        | 0       | 0       | 0        | 0        | 0         | 0       | 0        |

| Genus                | Cluster Number | Protein Counts | 3.7.1.2 | 3.7.1.9 | 3.8.1.- | 3.8.1.2 | 3.8.1.3 | 3.8.1.5 | 4.1.1.- | 4.1.1.44 | 4.1.1.55 | 4.1.1.7 | 4.1.1.70 | 4.1.1.77 | 4.1.2.- | 4.1.3.- | 4.1.3.39 | 4.1.99.- | 4.1.99.11 | 4.2.1.- | 4.2.1.17 |
|----------------------|----------------|----------------|---------|---------|---------|---------|---------|---------|---------|----------|----------|---------|----------|----------|---------|---------|----------|----------|-----------|---------|----------|
| Thermodesulfobium    | 1              | 13             | 0       | 0       | 0       | 0       | 0       | 0       | 0       | 0        | 0        | 0       | 0        | 0        | 0       | 0       | 0        | 0        | 0         | 0       | 0        |
| Thermodesulfovibrio  | 2              | 60             | 0       | 0       | 0       | 0       | 0       | 0       | 1       | 0        | 0        | 0       | 0        | 0        | 0       | 1       | 0        | 0        | 0         | 1       | 0        |
| Thermofilum          | 1              | 9              | 0       | 0       | 0       | 0       | 0       | 0       | 0       | 0        | 0        | 0       | 0        | 0        | 0       | 0       | 0        | 0        | 0         | 0       | 0        |
| Thermogladus         | 1              | 7              | 0       | 0       | 0       | 0       | 0       | 0       | 0       | 0        | 0        | 0       | 0        | 0        | 0       | 0       | 0        | 0        | 0         | 0       | 0        |
| Thermomicrobium      | 2              | 92             | 0       | 1       | 0       | 1       | 0       | 0       | 0       | 0        | 0        | 0       | 0        | 1        | 1       | 1       | 0        | 0        | 0         | 1       | 1        |
| Thermomonospora      | 2              | 125            | 1       | 1       | 0       | 1       | 0       | 0       | 0       | 1        | 0        | 0       | 0        | 1        | 0       | 1       | 1        | 0        | 0         | 1       | 1        |
| Thermoplasma         | 1              | 11             | 0       | 0       | 0       | 0       | 0       | 0       | 0       | 0        | 0        | 0       | 0        | 0        | 0       | 0       | 0        | 0        | 0         | 0       | 0        |
| Thermoplasmatales    | 1              | 6              | 0       | 0       | 0       | 0       | 0       | 0       | 0       | 0        | 0        | 0       | 0        | 0        | 0       | 0       | 0        | 0        | 0         | 0       | 0        |
| Thermoproteus        | 1              | 12             | 0       | 0       | 0       | 0       | 0       | 0       | 0       | 0        | 0        | 0       | 0        | 0        | 0       | 0       | 0        | 0        | 0         | 0       | 0        |
| Thermosediminibacter | 2              | 64             | 0       | 0       | 0       | 0       | 0       | 0       | 1       | 0        | 0        | 0       | 0        | 1        | 0       | 1       | 0        | 1        | 0         | 1       | 0        |
| Thermosipho          | 2              | 70             | 0       | 0       | 0       | 1       | 0       | 0       | 0       | 0        | 0        | 0       | 0        | 0        | 0       | 0       | 0        | 0        | 0         | 1       | 0        |
| Thermosphaera        | 1              | 10             | 0       | 0       | 0       | 0       | 0       | 0       | 0       | 0        | 0        | 0       | 0        | 0        | 0       | 0       | 0        | 0        | 0         | 0       | 0        |
| Thermosynechococcus  | 1              | 6              | 0       | 0       | 0       | 0       | 0       | 0       | 0       | 0        | 0        | 0       | 0        | 0        | 0       | 0       | 0        | 0        | 0         | 0       | 0        |
| Thermotoga           | 2              | 80             | 0       | 0       | 0       | 1       | 0       | 1       | 0       | 1        | 0        | 0       | 0        | 0        | 0       | 1       | 0        | 0        | 0         | 1       | 0        |
| Thermovibrio         | 2              | 58             | 0       | 0       | 0       | 0       | 0       | 0       | 1       | 0        | 0        | 0       | 0        | 0        | 0       | 1       | 0        | 0        | 0         | 1       | 0        |
| Thermovirga          | 1              | 9              | 0       | 0       | 0       | 0       | 0       | 0       | 0       | 0        | 0        | 0       | 0        | 0        | 0       | 0       | 0        | 0        | 0         | 0       | 0        |
| Thermus              | 2              | 107            | 0       | 1       | 0       | 1       | 0       | 0       | 1       | 1        | 0        | 0       | 0        | 1        | 0       | 1       | 1        | 0        | 0         | 1       | 1        |
| Thioalkalimicrobium  | 1              | 4              | 0       | 0       | 0       | 0       | 0       | 0       | 0       | 0        | 0        | 0       | 0        | 0        | 0       | 0       | 0        | 0        | 0         | 0       | 0        |
| Thioalkalivibrio     | 2              | 91             | 1       | 0       | 0       | 1       | 0       | 0       | 1       | 1        | 0        | 0       | 0        | 0        | 0       | 1       | 0        | 0        | 0         | 1       | 0        |
| Thiobaca             | 1              | 2              | 0       | 0       | 0       | 0       | 0       | 0       | 0       | 0        | 0        | 0       | 0        | 0        | 0       | 0       | 0        | 0        | 0         | 0       | 0        |
| Thiobacillus         | 2              | 67             | 0       | 0       | 0       | 0       | 0       | 0       | 1       | 0        | 0        | 0       | 0        | 0        | 0       | 1       | 0        | 0        | 0         | 1       | 1        |
| Thiocapsa            | 1              | 2              | 0       | 0       | 0       | 0       | 0       | 0       | 0       | 0        | 0        | 0       | 0        | 0        | 0       | 0       | 0        | 0        | 0         | 0       | 0        |
| Thiocystis           | 1              | 11             | 0       | 0       | 0       | 0       | 0       | 0       | 0       | 0        | 0        | 0       | 0        | 0        | 0       | 0       | 0        | 0        | 0         | 0       | 0        |
| Thioflavococcus      | 1              | 13             | 0       | 0       | 0       | 0       | 0       | 0       | 0       | 0        | 0        | 0       | 0        | 0        | 0       | 0       | 0        | 0        | 0         | 0       | 0        |
| Thiomicrospira       | 2              | 50             | 0       | 0       | 0       | 0       | 0       | 0       | 0       | 0        | 0        | 0       | 0        | 0        | 0       | 1       | 0        | 0        | 0         | 1       | 0        |
| Thiomonas            | 2              | 85             | 0       | 0       | 0       | 0       | 0       | 0       | 1       | 1        | 0        | 0       | 0        | 0        | 0       | 1       | 0        | 0        | 0         | 1       | 1        |
| Thiorhodococcus      | 1              | 2              | 0       | 0       | 0       | 0       | 0       | 0       | 0       | 0        | 0        | 0       | 0        | 0        | 0       | 0       | 0        | 0        | 0         | 0       | 0        |
| Thiothrix            | 1              | 2              | 0       | 0       | 0       | 0       | 0       | 0       | 0       | 0        | 0        | 0       | 0        | 0        | 0       | 0       | 0        | 0        | 0         | 0       | 0        |
| Tistrella            | 1              | 42             | 0       | 0       | 0       | 0       | 0       | 0       | 0       | 0        | 0        | 0       | 0        | 0        | 0       | 0       | 0        | 0        | 0         | 0       | 0        |
| Tolumonas            | 2              | 100            | 0       | 0       | 0       | 1       | 0       | 0       | 1       | 1        | 0        | 0       | 0        | 0        | 0       | 1       | 0        | 0        | 0         | 1       | 0        |
| Transposon           | 1              | 2              | 0       | 0       | 0       | 0       | 0       | 0       | 0       | 0        | 0        | 0       | 0        | 0        | 0       | 0       | 0        | 0        | 0         | 0       | 0        |
| Treponema            | 1              | 63             | 0       | 0       | 0       | 0       | 0       | 0       | 0       | 1        | 0        | 0       | 0        | 0        | 0       | 1       | 0        | 0        | 0         | 1       | 0        |
| Trichodesmium        | 2              | 71             | 0       | 0       | 0       | 0       | 0       | 1       | 1       | 1        | 0        | 0       | 0        | 0        | 0       | 1       | 0        | 0        | 0         | 1       | 0        |
| Trichormus           | 1              | 12             | 0       | 0       | 0       | 0       | 0       | 0       | 1       | 0        | 0        | 0       | 0        | 0        | 0       | 0       | 0        | 0        | 0         | 0       | 0        |
| Tropheryma           | 2              | 22             | 0       | 0       | 0       | 0       | 0       | 0       | 0       | 0        | 0        | 0       | 0        | 0        | 0       | 0       | 0        | 0        | 0         | 0       | 0        |
| Truepera             | 2              | 104            | 0       | 0       | 0       | 1       | 0       | 0       | 1       | 1        | 0        | 0       | 0        | 0        | 1       | 1       | 0        | 1        | 0         | 1       | 1        |
| Tsukamurella         | 2              | 123            | 0       | 0       | 0       | 1       | 0       | 0       | 0       | 0        | 0        | 0       | 0        | 0        | 0       | 1       | 1        | 0        | 0         | 1       | 1        |
| Turneriella          | 1              | 16             | 0       | 0       | 0       | 0       | 0       | 0       | 0       | 0        | 0        | 0       | 0        | 0        | 0       | 0       | 0        | 0        | 0         | 0       | 0        |
| Uliginosibacterium   | 1              | 2              | 0       | 0       | 0       | 0       | 0       | 0       | 0       | 0        | 0        | 0       | 0        | 0        | 0       | 0       | 0        | 0        | 0         | 0       | 0        |
| Ureaplasma           | 1              | 24             | 0       | 0       | 0       | 0       | 0       | 0       | 0       | 0        | 0        | 0       | 0        | 0        | 0       | 0       | 0        | 0        | 0         | 0       | 0        |
| Ureibacillus         | 1              | 2              | 0       | 0       | 0       | 0       | 0       | 0       | 0       | 0        | 0        | 0       | 0        | 0        | 0       | 0       | 0        | 0        | 0         | 0       | 0        |
| Variovorax           | 3              | 187            | 1       | 1       | 0       | 1       | 0       | 1       | 0       | 1        | 0        | 0       | 0        | 0        | 1       | 1       | 0        | 0        | 0         | 1       | 1        |
| Veillonella          | 1              | 54             | 0       | 0       | 0       | 0       | 0       | 0       | 0       | 1        | 0        | 0       | 0        | 0        | 0       | 1       | 0        | 0        | 0         | 1       | 0        |
| Verminephrobacter    | 3              | 188            | 1       | 1       | 0       | 1       | 0       | 1       | 0       | 1        | 1        | 0       | 0        | 1        | 1       | 1       | 1        | 0        | 0         | 1       | 1        |
| Verrucosispora       | 3              | 126            | 1       | 0       | 0       | 1       | 0       | 0       | 1       | 1        | 0        | 1       | 0        | 1        | 0       | 1       | 1        | 0        | 0         | 1       | 1        |
| Vibrio               | 2              | 195            | 1       | 0       | 0       | 1       | 0       | 1       | 1       | 1        | 0        | 0       | 0        | 0        | 1       | 1       | 0        | 0        | 0         | 1       | 1        |
| Vibrionales          | 1              | 46             | 1       | 0       | 0       | 0       | 0       | 0       | 0       | 0        | 0        | 0       | 0        | 0        | 0       | 1       | 0        | 0        | 0         | 1       | 0        |
| Vitreoscilla         | 1              | 1              | 0       | 0       | 0       | 0       | 0       | 0       | 0       | 0        | 0        | 0       | 0        | 0        | 0       | 0       | 0        | 0        | 0         | 0       | 1        |
| Vulcanisaeta         | 1              | 14             | 0       | 0       | 0       | 0       | 0       | 0       | 0       | 0        | 0        | 0       | 0        | 0        | 0       | 0       | 0        | 0        | 0         | 0       | 0        |
| Waddlia              | 2              | 68             | 0       | 0       | 0       | 0       | 0       | 0       | 1       | 0        | 0        | 0       | 0        | 0        | 0       | 0       | 0        | 1        | 0         | 1       | 1        |
| Wautersia            | 1              | 2              | 0       | 0       | 0       | 0       | 0       | 0       | 0       | 0        | 0        | 0       | 0        | 0        | 0       | 0       | 0        | 0        | 0         | 0       | 0        |
| Weeksella            | 2              | 65             | 1       | 0       | 0       | 0       | 0       | 0       | 0       | 0        | 0        | 0       | 0        | 0        | 0       | 0       | 0        | 0        | 0         | 1       | 1        |

| Genus             | Cluster Number | Protein Counts | 3.7.1.2 | 3.7.1.9 | 3.8.1.- | 3.8.1.2 | 3.8.1.3 | 3.8.1.5 | 4.1.1.- | 4.1.1.44 | 4.1.1.55 | 4.1.1.7 | 4.1.1.70 | 4.1.1.77 | 4.1.2.- | 4.1.3.- | 4.1.3.39 | 4.1.99.- | 4.1.99.11 | 4.2.1.- | 4.2.1.17 |
|-------------------|----------------|----------------|---------|---------|---------|---------|---------|---------|---------|----------|----------|---------|----------|----------|---------|---------|----------|----------|-----------|---------|----------|
| Weissella         | 1              | 14             | 0       | 0       | 0       | 0       | 0       | 0       | 1       | 0        | 0        | 0       | 0        | 0        | 0       | 0       | 0        | 0        | 0         | 0       | 0        |
| Wenxinia          | 1              | 2              | 0       | 0       | 0       | 0       | 0       | 0       | 0       | 0        | 0        | 0       | 0        | 0        | 0       | 0       | 0        | 0        | 0         | 0       | 0        |
| Wigglesworthia    | 1              | 29             | 0       | 0       | 0       | 1       | 0       | 0       | 1       | 0        | 0        | 0       | 0        | 0        | 0       | 0       | 0        | 0        | 0         | 0       | 0        |
| Wolbachia         | 1              | 32             | 0       | 0       | 0       | 0       | 0       | 0       | 1       | 0        | 0        | 0       | 0        | 0        | 0       | 0       | 0        | 0        | 0         | 1       | 0        |
| Wolinella         | 2              | 51             | 0       | 0       | 0       | 0       | 0       | 0       | 0       | 0        | 0        | 0       | 0        | 0        | 0       | 1       | 0        | 0        | 0         | 1       | 0        |
| Xanthobacter      | 3              | 176            | 1       | 0       | 0       | 1       | 0       | 1       | 0       | 1        | 0        | 0       | 0        | 0        | 0       | 1       | 0        | 0        | 0         | 1       | 1        |
| Xanthobacteraceae | 1              | 4              | 0       | 0       | 0       | 0       | 0       | 0       | 0       | 0        | 0        | 0       | 0        | 0        | 0       | 0       | 0        | 0        | 0         | 0       | 0        |
| Xanthomonadaceae  | 1              | 39             | 0       | 0       | 0       | 0       | 0       | 0       | 0       | 1        | 0        | 0       | 0        | 0        | 0       | 0       | 0        | 0        | 0         | 1       | 1        |
| Xanthomonas       | 2              | 162            | 0       | 1       | 0       | 1       | 0       | 1       | 0       | 1        | 0        | 0       | 0        | 0        | 1       | 1       | 0        | 0        | 0         | 1       | 1        |
| Xenorhabdus       | 2              | 127            | 0       | 0       | 0       | 1       | 0       | 0       | 1       | 0        | 0        | 0       | 0        | 0        | 1       | 1       | 0        | 0        | 0         | 1       | 1        |
| Xylanimonas       | 2              | 66             | 0       | 0       | 0       | 0       | 0       | 0       | 0       | 0        | 0        | 1       | 0        | 0        | 0       | 1       | 0        | 0        | 0         | 0       | 0        |
| Xylella           | 2              | 52             | 0       | 0       | 0       | 0       | 0       | 0       | 0       | 0        | 0        | 0       | 0        | 0        | 0       | 1       | 0        | 0        | 0         | 1       | 0        |
| Yersinia          | 2              | 145            | 0       | 0       | 0       | 1       | 0       | 0       | 1       | 1        | 0        | 0       | 0        | 0        | 1       | 1       | 0        | 0        | 0         | 1       | 1        |
| Yokenella         | 2              | 61             | 0       | 0       | 0       | 0       | 0       | 0       | 1       | 0        | 0        | 0       | 0        | 0        | 0       | 1       | 0        | 0        | 0         | 1       | 0        |
| Zobellia          | 1              | 28             | 0       | 0       | 0       | 0       | 0       | 0       | 0       | 0        | 0        | 0       | 0        | 0        | 0       | 1       | 0        | 0        | 0         | 0       | 1        |
| Zunongwangia      | 2              | 98             | 1       | 0       | 0       | 1       | 0       | 1       | 0       | 1        | 0        | 0       | 0        | 0        | 0       | 1       | 0        | 0        | 0         | 1       | 1        |
| Zymomonas         | 2              | 67             | 0       | 0       | 0       | 0       | 0       | 0       | 1       | 1        | 0        | 0       | 0        | 0        | 0       | 1       | 0        | 0        | 0         | 1       | 0        |
| Zymophilus        | 1              | 2              | 0       | 0       | 0       | 0       | 0       | 0       | 1       | 0        | 0        | 0       | 0        | 0        | 0       | 0       | 0        | 0        | 0         | 0       | 0        |

| Genus               | Cluster Number | Protein Counts | 4.2.1.80 | 4.2.1.83 | 4.2.1.84 | 4.99.1.7 | 5.1.2.2 | 5.2.1.2 | 5.3.3.1 | 5.3.3.4 | 5.3.99.- | 5.4.99.- | 5.5.1.1 | 5.5.1.2 | 6.2.1.- | 6.2.1.25 | 6.2.1.32 | 6.3.5.2 | K00002 | K00055 |
|---------------------|----------------|----------------|----------|----------|----------|----------|---------|---------|---------|---------|----------|----------|---------|---------|---------|----------|----------|---------|--------|--------|
| Acaricomes          | 1              | 2              | 0        | 0        | 0        | 0        | 0       | 0       | 0       | 0       | 0        | 0        | 0       | 0       | 0       | 0        | 0        | 0       | 0      | 0      |
| Acaryochloris       | 2              | 88             | 0        | 0        | 1        | 0        | 0       | 1       | 0       | 0       | 0        | 0        | 0       | 0       | 0       | 0        | 0        | 1       | 0      | 0      |
| Acetivibrio         | 1              | 2              | 0        | 0        | 0        | 0        | 0       | 0       | 0       | 0       | 0        | 0        | 0       | 0       | 0       | 0        | 0        | 0       | 0      | 0      |
| Acetobacter         | 2              | 85             | 0        | 0        | 0        | 0        | 0       | 0       | 0       | 0       | 0        | 0        | 0       | 0       | 0       | 0        | 0        | 1       | 0      | 0      |
| Acetobacteraceae    | 1              | 2              | 0        | 0        | 0        | 0        | 0       | 0       | 0       | 0       | 0        | 0        | 0       | 0       | 0       | 0        | 0        | 0       | 0      | 0      |
| Acetobacterium      | 1              | 8              | 0        | 0        | 0        | 0        | 0       | 0       | 0       | 0       | 0        | 0        | 0       | 0       | 0       | 0        | 0        | 0       | 0      | 0      |
| Acetohalobium       | 2              | 79             | 0        | 0        | 0        | 0        | 0       | 0       | 0       | 0       | 0        | 0        | 0       | 0       | 0       | 0        | 0        | 1       | 0      | 0      |
| Acholeplasma        | 2              | 38             | 0        | 0        | 0        | 0        | 0       | 0       | 0       | 0       | 0        | 0        | 0       | 0       | 0       | 0        | 0        | 0       | 0      | 0      |
| Achromobacter       | 2              | 192            | 0        | 0        | 0        | 0        | 1       | 1       | 0       | 1       | 1        | 0        | 1       | 0       | 0       | 1        | 0        | 1       | 0      | 0      |
| Acidaminococcus     | 1              | 65             | 0        | 0        | 0        | 0        | 0       | 0       | 0       | 0       | 0        | 0        | 0       | 0       | 0       | 0        | 0        | 1       | 0      | 0      |
| Acidianus           | 1              | 9              | 0        | 0        | 0        | 0        | 0       | 0       | 0       | 0       | 0        | 0        | 0       | 0       | 0       | 0        | 0        | 0       | 0      | 0      |
| Acidilobus          | 1              | 8              | 0        | 0        | 0        | 0        | 0       | 0       | 0       | 0       | 0        | 0        | 0       | 0       | 0       | 0        | 0        | 0       | 0      | 0      |
| Acidimicrobium      | 2              | 58             | 0        | 0        | 0        | 0        | 0       | 0       | 0       | 0       | 0        | 0        | 0       | 0       | 0       | 0        | 0        | 1       | 0      | 0      |
| Acidiphilium        | 3              | 144            | 0        | 1        | 1        | 0        | 0       | 0       | 0       | 0       | 1        | 1        | 0       | 1       | 0       | 0        | 0        | 1       | 0      | 0      |
| Acidithiobacillus   | 2              | 70             | 0        | 0        | 0        | 0        | 0       | 0       | 0       | 0       | 0        | 0        | 0       | 0       | 0       | 0        | 0        | 1       | 0      | 0      |
| Acidobacterium      | 2              | 91             | 0        | 0        | 0        | 0        | 1       | 0       | 0       | 0       | 1        | 0        | 0       | 0       | 0       | 0        | 0        | 1       | 0      | 0      |
| Acidocella          | 1              | 2              | 0        | 0        | 0        | 0        | 0       | 0       | 0       | 0       | 0        | 0        | 0       | 0       | 0       | 0        | 0        | 0       | 0      | 0      |
| Acidothermus        | 2              | 68             | 0        | 0        | 0        | 0        | 0       | 0       | 0       | 0       | 1        | 0        | 0       | 0       | 0       | 0        | 0        | 1       | 0      | 0      |
| Acidovorax          | 3              | 217            | 1        | 0        | 1        | 0        | 1       | 1       | 0       | 1       | 0        | 0        | 1       | 0       | 0       | 0        | 0        | 1       | 0      | 0      |
| Aciduliprofundum    | 1              | 11             | 0        | 0        | 0        | 0        | 0       | 0       | 0       | 0       | 0        | 0        | 0       | 0       | 0       | 0        | 0        | 0       | 0      | 0      |
| Acinetobacter       | 3              | 188            | 0        | 0        | 1        | 0        | 0       | 1       | 0       | 1       | 1        | 0        | 1       | 1       | 0       | 0        | 0        | 1       | 0      | 1      |
| Actinobacillus      | 2              | 112            | 0        | 0        | 0        | 0        | 0       | 0       | 0       | 1       | 1        | 0        | 0       | 0       | 0       | 0        | 0        | 1       | 0      | 0      |
| Actinomadura        | 1              | 1              | 0        | 0        | 0        | 0        | 0       | 0       | 0       | 0       | 0        | 0        | 0       | 0       | 0       | 0        | 0        | 0       | 0      | 0      |
| Actinoplanes        | 1              | 52             | 0        | 0        | 0        | 0        | 0       | 0       | 0       | 0       | 0        | 0        | 0       | 0       | 0       | 0        | 0        | 0       | 0      | 1      |
| Actinopolyspora     | 1              | 2              | 0        | 0        | 0        | 0        | 0       | 0       | 0       | 0       | 0        | 0        | 0       | 0       | 0       | 0        | 0        | 0       | 0      | 0      |
| Actinosynnema       | 2              | 122            | 0        | 0        | 0        | 1        | 0       | 0       | 0       | 0       | 1        | 0        | 0       | 1       | 0       | 0        | 0        | 1       | 0      | 1      |
| Advenella           | 1              | 30             | 0        | 0        | 0        | 0        | 0       | 0       | 0       | 0       | 0        | 0        | 0       | 0       | 0       | 0        | 0        | 0       | 0      | 0      |
| Aequorivita         | 1              | 12             | 0        | 0        | 0        | 0        | 0       | 0       | 0       | 0       | 0        | 0        | 0       | 0       | 0       | 0        | 0        | 0       | 0      | 0      |
| Aerococcus          | 2              | 57             | 0        | 0        | 0        | 0        | 0       | 0       | 0       | 0       | 0        | 0        | 0       | 0       | 0       | 0        | 0        | 1       | 0      | 0      |
| Aeromonas           | 2              | 127            | 0        | 0        | 0        | 0        | 0       | 1       | 0       | 0       | 0        | 0        | 0       | 0       | 0       | 0        | 0        | 1       | 0      | 0      |
| Aeropyrum           | 1              | 13             | 0        | 0        | 0        | 0        | 0       | 0       | 0       | 0       | 0        | 0        | 0       | 0       | 0       | 0        | 0        | 0       | 0      | 0      |
| Afipia              | 1              | 54             | 0        | 0        | 0        | 0        | 0       | 0       | 0       | 1       | 0        | 0        | 0       | 0       | 0       | 0        | 0        | 1       | 0      | 0      |
| Aggregatibacter     | 1              | 81             | 0        | 0        | 0        | 0        | 0       | 0       | 0       | 0       | 0        | 0        | 0       | 0       | 0       | 0        | 0        | 1       | 0      | 0      |
| Agrobacterium       | 2              | 242            | 0        | 0        | 1        | 0        | 0       | 1       | 0       | 1       | 1        | 0        | 1       | 1       | 0       | 1        | 0        | 1       | 1      | 1      |
| Ahrensia            | 1              | 2              | 0        | 0        | 0        | 0        | 0       | 0       | 0       | 0       | 0        | 0        | 0       | 0       | 0       | 0        | 0        | 0       | 0      | 0      |
| Akkermansia         | 2              | 47             | 0        | 0        | 0        | 0        | 0       | 0       | 0       | 0       | 0        | 0        | 0       | 0       | 0       | 0        | 0        | 1       | 0      | 0      |
| Albidiferax         | 3              | 144            | 0        | 1        | 0        | 0        | 0       | 0       | 0       | 0       | 0        | 0        | 0       | 1       | 0       | 1        | 0        | 1       | 0      | 0      |
| Alcaligenes         | 1              | 21             | 0        | 0        | 0        | 0        | 0       | 0       | 0       | 0       | 0        | 0        | 1       | 0       | 0       | 0        | 0        | 0       | 0      | 0      |
| Alcanivorax         | 2              | 146            | 0        | 0        | 0        | 0        | 0       | 0       | 0       | 0       | 0        | 0        | 0       | 0       | 1       | 0        | 0        | 1       | 1      | 0      |
| Alicyclophilus      | 3              | 152            | 0        | 0        | 0        | 0        | 0       | 1       | 0       | 1       | 0        | 0        | 1       | 0       | 1       | 0        | 0        | 1       | 0      | 0      |
| Alicyclobacillus    | 2              | 91             | 0        | 0        | 0        | 0        | 0       | 0       | 0       | 0       | 1        | 0        | 0       | 0       | 0       | 0        | 0        | 1       | 0      | 0      |
| Aliivibrio          | 2              | 118            | 1        | 0        | 0        | 0        | 0       | 1       | 0       | 0       | 0        | 0        | 0       | 0       | 0       | 0        | 0        | 1       | 0      | 0      |
| Alishewanella       | 1              | 1              | 0        | 0        | 0        | 0        | 0       | 0       | 0       | 0       | 0        | 0        | 0       | 0       | 0       | 0        | 0        | 0       | 0      | 0      |
| Alistipes           | 1              | 52             | 0        | 0        | 0        | 0        | 0       | 0       | 0       | 0       | 0        | 0        | 0       | 0       | 0       | 0        | 0        | 1       | 0      | 0      |
| Alkalilimnicola     | 2              | 97             | 0        | 0        | 0        | 0        | 0       | 0       | 0       | 0       | 0        | 0        | 0       | 0       | 0       | 0        | 0        | 1       | 0      | 0      |
| Alkaliphilus        | 2              | 62             | 0        | 0        | 0        | 0        | 0       | 0       | 0       | 0       | 0        | 0        | 0       | 0       | 0       | 0        | 0        | 1       | 0      | 0      |
| Allochromatium      | 2              | 84             | 0        | 0        | 0        | 0        | 0       | 0       | 0       | 0       | 0        | 0        | 0       | 0       | 0       | 0        | 0        | 1       | 0      | 0      |
| Alphaproteobacteria | 1              | 3              | 0        | 0        | 0        | 0        | 0       | 0       | 0       | 0       | 0        | 0        | 0       | 0       | 0       | 0        | 0        | 0       | 0      | 0      |
| Alteromonadales     | 1              | 12             | 0        | 0        | 0        | 0        | 0       | 0       | 0       | 0       | 0        | 0        | 0       | 0       | 0       | 0        | 0        | 0       | 0      | 0      |
| Alteromonas         | 1              | 37             | 0        | 0        | 0        | 0        | 0       | 0       | 0       | 0       | 0        | 0        | 0       | 0       | 0       | 0        | 0        | 0       | 0      | 0      |
| Aminobacter         | 1              | 4              | 0        | 0        | 0        | 0        | 0       | 0       | 0       | 0       | 0        | 0        | 0       | 0       | 0       | 0        | 0        | 0       | 0      | 0      |
| Aminobacterium      | 2              | 59             | 0        | 0        | 0        | 0        | 0       | 0       | 0       | 0       | 0        | 0        | 0       | 0       | 0       | 0        | 0        | 1       | 0      | 0      |



| Genus            | Cluster Number | Protein Counts | 4.2.1.80 | 4.2.1.83 | 4.2.1.84 | 4.99.1.7 | 5.1.2.2 | 5.2.1.2 | 5.3.3.1 | 5.3.3.4 | 5.3.99.- | 5.4.99.- | 5.5.1.1 | 5.5.1.2 | 6.2.1.- | 6.2.1.25 | 6.2.1.32 | 6.3.5.2 | K00002 | K00055 |
|------------------|----------------|----------------|----------|----------|----------|----------|---------|---------|---------|---------|----------|----------|---------|---------|---------|----------|----------|---------|--------|--------|
| Ammonifex        | 2              | 50             | 0        | 0        | 0        | 0        | 0       | 0       | 0       | 0       | 0        | 0        | 0       | 0       | 0       | 0        | 0        | 1       | 0      | 0      |
| Amphibacillus    | 1              | 13             | 0        | 0        | 0        | 0        | 0       | 0       | 0       | 0       | 0        | 0        | 0       | 0       | 0       | 0        | 0        | 0       | 0      | 0      |
| Amphritea        | 1              | 2              | 0        | 0        | 0        | 0        | 0       | 0       | 0       | 0       | 0        | 0        | 0       | 0       | 0       | 0        | 0        | 0       | 0      | 0      |
| Amycolatopsis    | 2              | 201            | 0        | 0        | 0        | 0        | 1       | 0       | 0       | 0       | 1        | 0        | 1       | 1       | 0       | 0        | 0        | 1       | 0      | 1      |
| Amycolicoccus    | 1              | 43             | 0        | 0        | 1        | 0        | 0       | 0       | 0       | 0       | 0        | 0        | 0       | 0       | 0       | 0        | 0        | 0       | 0      | 1      |
| Anabaena         | 2              | 92             | 0        | 0        | 0        | 0        | 0       | 0       | 0       | 0       | 0        | 0        | 0       | 0       | 0       | 0        | 0        | 1       | 0      | 0      |
| Anaerobaculum    | 1              | 11             | 0        | 0        | 0        | 0        | 0       | 0       | 0       | 0       | 0        | 0        | 0       | 0       | 0       | 0        | 0        | 0       | 0      | 0      |
| Anaerococcus     | 2              | 46             | 0        | 0        | 0        | 0        | 0       | 0       | 0       | 0       | 0        | 0        | 0       | 0       | 0       | 0        | 0        | 1       | 0      | 0      |
| Anaerolinea      | 2              | 66             | 0        | 0        | 0        | 0        | 0       | 0       | 0       | 0       | 1        | 0        | 0       | 0       | 0       | 0        | 0        | 1       | 0      | 0      |
| Anaeromyxobacter | 3              | 117            | 0        | 0        | 0        | 0        | 0       | 0       | 0       | 0       | 0        | 0        | 0       | 0       | 0       | 0        | 0        | 1       | 0      | 0      |
| Anaerostipes     | 1              | 44             | 0        | 0        | 0        | 0        | 0       | 0       | 0       | 0       | 1        | 0        | 0       | 0       | 0       | 0        | 0        | 0       | 0      | 0      |
| Anaerotruncus    | 1              | 2              | 0        | 0        | 0        | 0        | 0       | 0       | 0       | 0       | 0        | 0        | 0       | 0       | 0       | 0        | 0        | 0       | 0      | 0      |
| Anaplasma        | 1              | 35             | 0        | 0        | 0        | 0        | 0       | 0       | 0       | 0       | 0        | 0        | 0       | 0       | 0       | 0        | 0        | 1       | 0      | 0      |
| Ancylobacter     | 1              | 3              | 0        | 0        | 0        | 0        | 0       | 0       | 0       | 0       | 0        | 0        | 0       | 0       | 0       | 0        | 0        | 0       | 0      | 0      |
| Aneurinibacillus | 1              | 1              | 0        | 0        | 0        | 0        | 0       | 0       | 0       | 0       | 0        | 0        | 0       | 0       | 0       | 0        | 0        | 0       | 0      | 0      |
| Angomonas        | 1              | 1              | 0        | 0        | 0        | 0        | 0       | 0       | 0       | 0       | 0        | 0        | 0       | 0       | 0       | 0        | 0        | 0       | 0      | 0      |
| Anoxybacillus    | 2              | 72             | 0        | 0        | 0        | 0        | 0       | 0       | 0       | 0       | 0        | 0        | 0       | 0       | 0       | 0        | 0        | 1       | 0      | 0      |
| Aquifex          | 2              | 45             | 0        | 0        | 0        | 0        | 0       | 0       | 0       | 0       | 0        | 0        | 0       | 0       | 0       | 0        | 0        | 1       | 0      | 0      |
| Aquimarina       | 1              | 2              | 0        | 0        | 0        | 0        | 0       | 0       | 0       | 0       | 0        | 0        | 0       | 0       | 0       | 0        | 0        | 0       | 0      | 0      |
| Arcanobacterium  | 2              | 45             | 0        | 0        | 0        | 0        | 0       | 0       | 0       | 0       | 0        | 0        | 0       | 0       | 0       | 0        | 0        | 1       | 0      | 0      |
| Archaeoglobus    | 1              | 14             | 0        | 0        | 0        | 0        | 0       | 0       | 0       | 0       | 0        | 0        | 0       | 0       | 0       | 0        | 0        | 0       | 0      | 0      |
| Arcobacter       | 2              | 101            | 1        | 0        | 0        | 0        | 0       | 0       | 0       | 0       | 0        | 0        | 0       | 0       | 0       | 0        | 0        | 1       | 1      | 0      |
| Aromatoleum      | 3              | 133            | 0        | 0        | 0        | 0        | 1       | 0       | 0       | 0       | 0        | 0        | 0       | 0       | 0       | 1        | 0        | 1       | 0      | 1      |
| Arsenophonus     | 1              | 4              | 0        | 0        | 0        | 0        | 0       | 0       | 0       | 0       | 0        | 0        | 0       | 0       | 0       | 0        | 0        | 0       | 0      | 0      |
| Arthrobacter     | 2              | 206            | 0        | 1        | 1        | 0        | 0       | 0       | 0       | 1       | 1        | 0        | 1       | 1       | 0       | 0        | 0        | 1       | 0      | 1      |
| Arthrospira      | 2              | 67             | 0        | 0        | 0        | 0        | 0       | 0       | 0       | 0       | 0        | 0        | 0       | 0       | 0       | 0        | 0        | 1       | 0      | 0      |
| Aster            | 1              | 10             | 0        | 0        | 0        | 0        | 0       | 0       | 0       | 0       | 0        | 0        | 0       | 0       | 0       | 0        | 0        | 0       | 0      | 0      |
| Asticcacaulis    | 2              | 103            | 0        | 1        | 0        | 0        | 0       | 0       | 0       | 0       | 0        | 0        | 1       | 0       | 0       | 0        | 0        | 1       | 0      | 0      |
| Atopobium        | 1              | 28             | 0        | 0        | 0        | 0        | 0       | 0       | 0       | 0       | 0        | 0        | 0       | 0       | 0       | 0        | 0        | 1       | 0      | 0      |
| Aurantimonas     | 1              | 2              | 0        | 0        | 0        | 0        | 0       | 0       | 0       | 0       | 0        | 0        | 0       | 0       | 0       | 0        | 0        | 0       | 0      | 0      |
| Avibacterium     | 1              | 17             | 0        | 0        | 0        | 0        | 0       | 0       | 0       | 0       | 0        | 0        | 0       | 0       | 0       | 0        | 0        | 1       | 0      | 0      |
| Azoarcus         | 3              | 172            | 1        | 1        | 0        | 0        | 0       | 1       | 0       | 0       | 0        | 0        | 0       | 0       | 0       | 1        | 0        | 1       | 0      | 0      |
| Azorhizobium     | 3              | 149            | 1        | 0        | 1        | 0        | 0       | 0       | 0       | 1       | 0        | 0        | 1       | 1       | 0       | 0        | 0        | 1       | 0      | 0      |
| Azorhizophilus   | 1              | 4              | 0        | 0        | 0        | 0        | 0       | 0       | 0       | 0       | 0        | 0        | 0       | 0       | 0       | 0        | 0        | 0       | 0      | 0      |
| Azospira         | 1              | 19             | 0        | 0        | 0        | 0        | 0       | 0       | 0       | 0       | 0        | 0        | 0       | 0       | 0       | 0        | 0        | 0       | 0      | 0      |
| Azospirillum     | 2              | 198            | 0        | 0        | 0        | 0        | 0       | 0       | 0       | 1       | 0        | 0        | 1       | 1       | 0       | 0        | 0        | 1       | 0      | 1      |
| Azotobacter      | 3              | 183            | 1        | 0        | 0        | 0        | 0       | 0       | 0       | 0       | 1        | 0        | 0       | 1       | 0       | 0        | 0        | 1       | 0      | 0      |
| Bacillales       | 1              | 9              | 0        | 0        | 0        | 0        | 0       | 0       | 0       | 0       | 0        | 0        | 0       | 0       | 0       | 0        | 0        | 0       | 0      | 0      |
| Bacilli          | 1              | 3              | 0        | 0        | 0        | 0        | 0       | 0       | 0       | 0       | 0        | 0        | 0       | 0       | 0       | 0        | 0        | 0       | 0      | 0      |
| Bacillus         | 2              | 237            | 0        | 0        | 1        | 0        | 0       | 0       | 0       | 0       | 1        | 1        | 1       | 0       | 1       | 0        | 0        | 1       | 1      | 1      |
| Bacteria         | 2              | 86             | 0        | 0        | 0        | 0        | 0       | 1       | 0       | 1       | 1        | 0        | 0       | 0       | 0       | 0        | 0        | 0       | 0      | 0      |
| Bacteriovorax    | 2              | 98             | 0        | 0        | 0        | 0        | 0       | 0       | 0       | 0       | 0        | 0        | 0       | 0       | 0       | 0        | 0        | 1       | 0      | 0      |
| Bacteroidales    | 2              | 59             | 0        | 0        | 0        | 0        | 0       | 0       | 0       | 0       | 1        | 0        | 0       | 0       | 0       | 0        | 0        | 1       | 0      | 0      |
| Bacteroides      | 2              | 96             | 0        | 0        | 0        | 0        | 0       | 0       | 0       | 0       | 1        | 0        | 0       | 0       | 0       | 0        | 0        | 1       | 0      | 0      |
| Bacteroidetes    | 1              | 2              | 0        | 0        | 0        | 0        | 0       | 0       | 0       | 0       | 0        | 0        | 0       | 0       | 0       | 0        | 0        | 0       | 0      | 0      |
| Bartonella       | 2              | 50             | 0        | 0        | 0        | 0        | 0       | 0       | 0       | 0       | 0        | 0        | 0       | 0       | 0       | 0        | 0        | 1       | 0      | 0      |
| Baumannia        | 2              | 24             | 0        | 0        | 0        | 0        | 0       | 0       | 0       | 0       | 0        | 0        | 0       | 0       | 0       | 0        | 0        | 1       | 0      | 0      |
| Bdellovibrio     | 2              | 87             | 0        | 0        | 0        | 0        | 0       | 0       | 0       | 0       | 0        | 0        | 0       | 0       | 0       | 0        | 0        | 1       | 0      | 0      |
| Beijerinckia     | 3              | 123            | 0        | 0        | 0        | 0        | 0       | 1       | 0       | 0       | 1        | 0        | 1       | 0       | 0       | 0        | 0        | 1       | 0      | 0      |
| Belliella        | 1              | 14             | 0        | 0        | 0        | 0        | 0       | 0       | 0       | 0       | 0        | 0        | 0       | 0       | 0       | 0        | 0        | 0       | 0      | 0      |
| Beutenbergia     | 2              | 82             | 0        | 0        | 0        | 0        | 0       | 0       | 0       | 0       | 1        | 0        | 0       | 0       | 0       | 0        | 0        | 1       | 0      | 0      |
| Bifidobacterium  | 2              | 61             | 0        | 0        | 0        | 0        | 0       | 0       | 0       | 0       | 0        | 0        | 0       | 0       | 0       | 0        | 0        | 1       | 0      | 0      |

| Genus                | Cluster Number | Protein Counts | 4.2.1.80 | 4.2.1.83 | 4.2.1.84 | 4.99.1.7 | 5.1.2.2 | 5.2.1.2 | 5.3.3.1 | 5.3.3.4 | 5.3.99.- | 5.4.99.- | 5.5.1.1 | 5.5.1.2 | 6.2.1.- | 6.2.1.25 | 6.2.1.32 | 6.3.5.2 | K00002 | K00055 |
|----------------------|----------------|----------------|----------|----------|----------|----------|---------|---------|---------|---------|----------|----------|---------|---------|---------|----------|----------|---------|--------|--------|
| Bizonia              | 1              | 1              | 0        | 0        | 0        | 0        | 0       | 0       | 0       | 0       | 0        | 0        | 0       | 0       | 0       | 0        | 0        | 0       | 0      | 0      |
| Blastococcus         | 1              | 39             | 0        | 0        | 0        | 0        | 0       | 0       | 0       | 0       | 0        | 0        | 0       | 0       | 0       | 0        | 0        | 0       | 0      | 0      |
| Blattabacterium      | 1              | 23             | 0        | 0        | 0        | 0        | 0       | 0       | 0       | 0       | 0        | 0        | 0       | 0       | 0       | 0        | 0        | 1       | 0      | 0      |
| Blautia              | 1              | 22             | 0        | 0        | 0        | 0        | 0       | 0       | 0       | 0       | 1        | 0        | 0       | 0       | 0       | 0        | 0        | 0       | 0      | 0      |
| Bordetella           | 3              | 227            | 1        | 0        | 1        | 0        | 1       | 1       | 0       | 1       | 0        | 0        | 1       | 1       | 0       | 1        | 0        | 1       | 0      | 1      |
| Borrelia             | 1              | 32             | 0        | 0        | 0        | 0        | 0       | 0       | 0       | 0       | 0        | 0        | 0       | 0       | 0       | 0        | 0        | 1       | 0      | 0      |
| Brachybacterium      | 1              | 18             | 0        | 0        | 0        | 0        | 0       | 0       | 0       | 0       | 0        | 0        | 0       | 0       | 0       | 0        | 0        | 0       | 0      | 0      |
| Brachymonas          | 1              | 4              | 0        | 0        | 0        | 0        | 0       | 0       | 0       | 0       | 0        | 0        | 0       | 0       | 0       | 0        | 0        | 1       | 0      | 0      |
| Brachyspira          | 2              | 79             | 0        | 0        | 0        | 0        | 0       | 0       | 0       | 0       | 0        | 1        | 0       | 0       | 0       | 0        | 0        | 1       | 0      | 0      |
| Bradyrhizobiaceae    | 1              | 20             | 0        | 0        | 0        | 0        | 0       | 0       | 0       | 0       | 0        | 0        | 0       | 0       | 0       | 0        | 0        | 1       | 0      | 0      |
| Bradyrhizobium       | 3              | 254            | 1        | 1        | 1        | 0        | 1       | 1       | 0       | 1       | 1        | 0        | 0       | 0       | 0       | 1        | 0        | 1       | 0      | 1      |
| Brenneria            | 1              | 20             | 0        | 0        | 0        | 0        | 0       | 0       | 0       | 0       | 0        | 0        | 0       | 0       | 0       | 0        | 0        | 1       | 0      | 0      |
| Brevibacillus        | 2              | 122            | 0        | 0        | 0        | 0        | 0       | 0       | 0       | 0       | 1        | 0        | 1       | 0       | 0       | 0        | 0        | 1       | 0      | 0      |
| Brevibacterium       | 1              | 4              | 0        | 0        | 1        | 0        | 0       | 0       | 0       | 0       | 0        | 0        | 0       | 0       | 0       | 0        | 0        | 0       | 0      | 0      |
| Brevundimonas        | 2              | 105            | 0        | 1        | 0        | 0        | 0       | 0       | 0       | 0       | 0        | 0        | 0       | 0       | 0       | 0        | 0        | 1       | 0      | 0      |
| Brucella             | 3              | 138            | 0        | 0        | 0        | 0        | 0       | 1       | 0       | 0       | 1        | 0        | 1       | 1       | 0       | 0        | 0        | 1       | 0      | 0      |
| Buchnera             | 1              | 26             | 0        | 0        | 0        | 0        | 0       | 0       | 0       | 0       | 0        | 0        | 0       | 0       | 0       | 0        | 0        | 0       | 0      | 0      |
| Burkholderia         | 3              | 424            | 1        | 1        | 1        | 0        | 1       | 1       | 0       | 1       | 1        | 0        | 1       | 1       | 1       | 1        | 1        | 1       | 0      | 1      |
| Burkholderiaceae     | 3              | 143            | 0        | 0        | 0        | 0        | 0       | 1       | 0       | 0       | 0        | 0        | 1       | 0       | 0       | 0        | 0        | 1       | 0      | 0      |
| Burkholderiales      | 1              | 24             | 0        | 0        | 0        | 0        | 0       | 0       | 0       | 0       | 0        | 0        | 0       | 0       | 0       | 0        | 0        | 0       | 0      | 0      |
| Buttiauxella         | 1              | 2              | 0        | 0        | 1        | 0        | 0       | 0       | 0       | 0       | 0        | 0        | 0       | 0       | 0       | 0        | 0        | 0       | 0      | 0      |
| Butyrivibrio         | 2              | 67             | 0        | 1        | 1        | 0        | 0       | 0       | 0       | 0       | 0        | 0        | 0       | 0       | 0       | 0        | 0        | 1       | 0      | 0      |
| Caldanaerobacter     | 2              | 63             | 0        | 0        | 0        | 0        | 0       | 0       | 0       | 0       | 1        | 0        | 0       | 0       | 0       | 0        | 0        | 1       | 0      | 0      |
| Caldicellulosiruptor | 2              | 75             | 0        | 0        | 0        | 0        | 0       | 0       | 0       | 0       | 1        | 0        | 0       | 0       | 0       | 0        | 0        | 1       | 0      | 0      |
| Caldilinea           | 1              | 23             | 0        | 0        | 0        | 0        | 0       | 0       | 0       | 0       | 0        | 0        | 0       | 0       | 0       | 0        | 0        | 0       | 0      | 0      |
| Caldimonas           | 1              | 6              | 0        | 0        | 0        | 0        | 0       | 0       | 0       | 0       | 0        | 0        | 0       | 0       | 0       | 0        | 0        | 0       | 0      | 0      |
| Caldisericum         | 1              | 10             | 0        | 0        | 0        | 0        | 0       | 0       | 0       | 0       | 0        | 0        | 0       | 0       | 0       | 0        | 0        | 0       | 0      | 0      |
| Caldisphaera         | 1              | 7              | 0        | 0        | 0        | 0        | 0       | 0       | 0       | 0       | 0        | 0        | 0       | 0       | 0       | 0        | 0        | 0       | 0      | 0      |
| Calditerrivibrio     | 2              | 74             | 0        | 0        | 0        | 0        | 0       | 0       | 0       | 0       | 0        | 0        | 0       | 0       | 0       | 0        | 0        | 1       | 0      | 0      |
| Caldivirga           | 1              | 13             | 0        | 0        | 0        | 0        | 0       | 0       | 0       | 0       | 0        | 0        | 0       | 0       | 0       | 0        | 0        | 0       | 0      | 0      |
| Calothrix            | 1              | 43             | 0        | 0        | 0        | 0        | 0       | 0       | 0       | 0       | 0        | 0        | 0       | 0       | 0       | 0        | 0        | 1       | 0      | 0      |
| Calyptogena          | 2              | 34             | 0        | 0        | 0        | 0        | 0       | 0       | 0       | 0       | 0        | 0        | 0       | 0       | 0       | 0        | 0        | 1       | 0      | 0      |
| Campylobacter        | 2              | 80             | 0        | 0        | 0        | 0        | 0       | 0       | 0       | 0       | 0        | 0        | 0       | 0       | 0       | 0        | 0        | 1       | 0      | 0      |
| Candidatus           | 2              | 290            | 0        | 1        | 1        | 0        | 1       | 1       | 0       | 0       | 1        | 0        | 1       | 1       | 0       | 0        | 0        | 1       | 0      | 1      |
| Capnocytophaga       | 1              | 50             | 0        | 0        | 0        | 0        | 0       | 0       | 0       | 0       | 0        | 0        | 0       | 0       | 0       | 0        | 0        | 1       | 0      | 0      |
| Carbophilus          | 1              | 2              | 0        | 0        | 0        | 0        | 0       | 0       | 0       | 0       | 0        | 0        | 0       | 0       | 0       | 0        | 0        | 0       | 0      | 0      |
| Carboxydibrachium    | 1              | 14             | 0        | 0        | 0        | 0        | 0       | 0       | 0       | 0       | 0        | 0        | 0       | 0       | 0       | 0        | 0        | 1       | 0      | 0      |
| Carboxydothermus     | 2              | 68             | 1        | 0        | 0        | 0        | 0       | 0       | 0       | 0       | 0        | 0        | 0       | 0       | 0       | 0        | 0        | 1       | 0      | 0      |
| Carica               | 1              | 2              | 0        | 0        | 0        | 0        | 0       | 0       | 0       | 0       | 0        | 0        | 0       | 0       | 0       | 0        | 0        | 0       | 0      | 0      |
| Carnobacterium       | 2              | 71             | 0        | 0        | 0        | 0        | 0       | 0       | 0       | 0       | 0        | 0        | 0       | 0       | 0       | 0        | 0        | 1       | 0      | 0      |
| Catenibacterium      | 1              | 2              | 0        | 0        | 0        | 0        | 0       | 0       | 0       | 0       | 0        | 0        | 0       | 0       | 0       | 0        | 0        | 0       | 0      | 0      |
| Catenovulum          | 1              | 2              | 0        | 0        | 0        | 0        | 0       | 0       | 0       | 0       | 0        | 0        | 0       | 0       | 0       | 0        | 0        | 0       | 0      | 0      |
| Catenulispora        | 3              | 159            | 0        | 1        | 0        | 0        | 0       | 0       | 0       | 1       | 1        | 0        | 0       | 1       | 0       | 0        | 0        | 1       | 0      | 1      |
| Caulobacter          | 3              | 168            | 1        | 0        | 0        | 0        | 0       | 1       | 0       | 0       | 1        | 0        | 1       | 1       | 1       | 0        | 0        | 1       | 0      | 1      |
| Cedecea              | 1              | 45             | 0        | 0        | 0        | 0        | 0       | 0       | 0       | 0       | 0        | 0        | 0       | 0       | 0       | 0        | 0        | 1       | 0      | 0      |
| Cellulomonas         | 2              | 96             | 0        | 0        | 0        | 0        | 0       | 0       | 0       | 0       | 1        | 0        | 0       | 0       | 0       | 0        | 0        | 1       | 0      | 0      |
| Cellulophaga         | 2              | 105            | 0        | 0        | 0        | 0        | 0       | 0       | 0       | 1       | 1        | 0        | 1       | 0       | 0       | 0        | 0        | 1       | 0      | 0      |
| Cellulosilyticum     | 1              | 14             | 0        | 0        | 0        | 0        | 0       | 0       | 0       | 0       | 0        | 0        | 0       | 0       | 0       | 0        | 0        | 0       | 0      | 0      |
| Cellvibrio           | 2              | 85             | 0        | 0        | 0        | 0        | 0       | 1       | 0       | 0       | 1        | 0        | 0       | 0       | 0       | 0        | 0        | 1       | 0      | 0      |
| Cenarchaeum          | 1              | 7              | 0        | 0        | 0        | 0        | 0       | 0       | 0       | 0       | 0        | 0        | 0       | 0       | 0       | 0        | 0        | 0       | 0      | 0      |
| Chamaesiphon         | 1              | 13             | 0        | 0        | 0        | 0        | 0       | 0       | 0       | 0       | 0        | 0        | 0       | 0       | 0       | 0        | 0        | 0       | 0      | 0      |
| Chelativorans        | 3              | 136            | 1        | 0        | 0        | 0        | 0       | 0       | 0       | 0       | 1        | 0        | 1       | 1       | 0       | 0        | 0        | 1       | 0      | 0      |

| Genus                  | Cluster Number | Protein Counts | 4.2.1.80 | 4.2.1.83 | 4.2.1.84 | 4.99.1.7 | 5.1.2.2 | 5.2.1.2 | 5.3.3.1 | 5.3.3.4 | 5.3.99.- | 5.4.99.- | 5.5.1.1 | 5.5.1.2 | 6.2.1.- | 6.2.1.25 | 6.2.1.32 | 6.3.5.2 | K00002 | K00055 |
|------------------------|----------------|----------------|----------|----------|----------|----------|---------|---------|---------|---------|----------|----------|---------|---------|---------|----------|----------|---------|--------|--------|
| Chelatococcus          | 1              | 2              | 0        | 0        | 0        | 0        | 0       | 0       | 0       | 0       | 0        | 0        | 0       | 0       | 0       | 0        | 0        | 0       | 0      | 0      |
| Chitinophaga           | 2              | 98             | 0        | 0        | 0        | 0        | 0       | 0       | 0       | 0       | 1        | 0        | 0       | 0       | 0       | 0        | 0        | 1       | 0      | 0      |
| Chlamydia              | 1              | 36             | 0        | 0        | 0        | 0        | 0       | 0       | 0       | 0       | 0        | 0        | 0       | 0       | 0       | 0        | 0        | 1       | 0      | 0      |
| Chlamydomonas          | 1              | 3              | 0        | 0        | 0        | 0        | 0       | 0       | 0       | 0       | 0        | 0        | 0       | 0       | 0       | 0        | 0        | 0       | 0      | 0      |
| Chlamydophila          | 1              | 31             | 0        | 0        | 0        | 0        | 0       | 0       | 0       | 0       | 0        | 0        | 0       | 0       | 0       | 0        | 0        | 1       | 0      | 0      |
| Chlorobaculum          | 2              | 61             | 0        | 0        | 0        | 0        | 0       | 0       | 0       | 0       | 0        | 0        | 0       | 0       | 0       | 0        | 0        | 1       | 0      | 0      |
| Chlorobium             | 2              | 89             | 0        | 0        | 0        | 0        | 0       | 0       | 0       | 0       | 0        | 0        | 0       | 0       | 0       | 0        | 0        | 1       | 0      | 0      |
| Chlorobium/Pelodictyon | 1              | 2              | 0        | 0        | 0        | 0        | 0       | 0       | 0       | 0       | 0        | 0        | 0       | 0       | 0       | 0        | 0        | 0       | 0      | 0      |
| Chloroflexus           | 2              | 105            | 0        | 0        | 0        | 0        | 0       | 0       | 0       | 0       | 0        | 0        | 0       | 0       | 0       | 0        | 0        | 1       | 0      | 0      |
| Chlorogloeopsis        | 1              | 9              | 0        | 0        | 0        | 0        | 0       | 0       | 0       | 0       | 0        | 0        | 0       | 0       | 0       | 0        | 0        | 0       | 0      | 0      |
| Chloroherpeton         | 2              | 59             | 0        | 0        | 0        | 0        | 0       | 0       | 0       | 0       | 0        | 0        | 0       | 0       | 0       | 0        | 0        | 1       | 0      | 0      |
| Chromobacterium        | 2              | 117            | 0        | 0        | 0        | 0        | 0       | 1       | 0       | 0       | 0        | 0        | 0       | 0       | 0       | 0        | 0        | 1       | 0      | 0      |
| Chromohalobacter       | 2              | 145            | 0        | 0        | 0        | 0        | 1       | 0       | 0       | 0       | 1        | 0        | 0       | 1       | 0       | 0        | 0        | 1       | 0      | 1      |
| Chroococciopsis        | 1              | 24             | 0        | 0        | 0        | 0        | 0       | 0       | 0       | 0       | 0        | 0        | 0       | 0       | 0       | 0        | 0        | 0       | 0      | 0      |
| Chryseobacterium       | 2              | 104            | 1        | 1        | 0        | 0        | 1       | 1       | 0       | 0       | 0        | 0        | 1       | 1       | 0       | 1        | 0        | 1       | 0      | 0      |
| Citricella             | 1              | 13             | 0        | 0        | 0        | 0        | 0       | 0       | 0       | 0       | 0        | 0        | 0       | 0       | 0       | 0        | 0        | 0       | 0      | 0      |
| Citrobacter            | 2              | 190            | 1        | 0        | 0        | 0        | 0       | 1       | 0       | 0       | 1        | 0        | 0       | 1       | 0       | 0        | 0        | 1       | 0      | 0      |
| Clavibacter            | 2              | 83             | 0        | 0        | 0        | 0        | 0       | 0       | 0       | 0       | 1        | 0        | 0       | 0       | 0       | 0        | 0        | 1       | 0      | 0      |
| Clonorchis             | 1              | 1              | 0        | 0        | 0        | 0        | 0       | 0       | 0       | 0       | 0        | 0        | 0       | 0       | 0       | 0        | 0        | 0       | 0      | 0      |
| Clostridiales          | 2              | 77             | 0        | 0        | 0        | 0        | 0       | 0       | 0       | 0       | 1        | 0        | 0       | 0       | 0       | 0        | 0        | 1       | 0      | 0      |
| Clostridium            | 2              | 191            | 0        | 0        | 0        | 0        | 0       | 0       | 0       | 0       | 1        | 0        | 1       | 0       | 0       | 0        | 0        | 1       | 1      | 1      |
| Cohnella               | 1              | 2              | 0        | 0        | 0        | 0        | 0       | 0       | 0       | 0       | 0        | 0        | 0       | 0       | 0       | 0        | 0        | 0       | 0      | 0      |
| Coleofasciculus        | 1              | 4              | 0        | 0        | 0        | 0        | 0       | 0       | 0       | 0       | 0        | 0        | 0       | 0       | 0       | 0        | 0        | 0       | 0      | 0      |
| Collimonas             | 1              | 35             | 0        | 0        | 0        | 0        | 0       | 0       | 0       | 0       | 0        | 0        | 0       | 0       | 0       | 0        | 0        | 1       | 0      | 0      |
| Colwellia              | 2              | 130            | 1        | 0        | 0        | 0        | 0       | 1       | 0       | 0       | 0        | 0        | 0       | 0       | 0       | 0        | 0        | 1       | 0      | 0      |
| Comamonas              | 2              | 196            | 0        | 0        | 1        | 0        | 1       | 1       | 1       | 1       | 1        | 0        | 1       | 0       | 0       | 1        | 0        | 1       | 0      | 0      |
| Conexibacter           | 3              | 117            | 0        | 0        | 0        | 0        | 0       | 0       | 0       | 1       | 0        | 0        | 1       | 0       | 0       | 0        | 0        | 1       | 0      | 0      |
| Coprobacillus          | 1              | 2              | 0        | 0        | 0        | 0        | 0       | 0       | 0       | 0       | 0        | 0        | 0       | 0       | 0       | 0        | 0        | 0       | 0      | 0      |
| Coprococcus            | 2              | 76             | 0        | 0        | 0        | 0        | 0       | 0       | 0       | 0       | 0        | 0        | 1       | 0       | 0       | 0        | 0        | 1       | 0      | 0      |
| Coprothermobacter      | 2              | 45             | 0        | 0        | 0        | 0        | 0       | 0       | 0       | 0       | 0        | 0        | 0       | 0       | 0       | 0        | 0        | 1       | 0      | 0      |
| Coralimargarita        | 2              | 68             | 0        | 0        | 0        | 0        | 0       | 0       | 0       | 1       | 1        | 0        | 0       | 0       | 0       | 0        | 0        | 1       | 0      | 0      |
| Corallococcus          | 1              | 29             | 0        | 0        | 0        | 0        | 0       | 0       | 0       | 0       | 0        | 0        | 0       | 0       | 0       | 0        | 0        | 1       | 0      | 1      |
| Coriobacterium         | 2              | 36             | 0        | 0        | 0        | 0        | 0       | 0       | 0       | 0       | 1        | 0        | 0       | 0       | 0       | 0        | 0        | 1       | 0      | 0      |
| Corynebacterineae      | 1              | 5              | 0        | 0        | 0        | 0        | 0       | 0       | 0       | 0       | 0        | 0        | 0       | 0       | 0       | 0        | 0        | 0       | 0      | 0      |
| Corynebacterium        | 2              | 175            | 0        | 0        | 0        | 0        | 0       | 0       | 0       | 1       | 0        | 0        | 1       | 1       | 0       | 0        | 0        | 1       | 1      | 1      |
| Coxiella               | 2              | 54             | 0        | 0        | 0        | 0        | 0       | 0       | 0       | 0       | 0        | 0        | 0       | 0       | 0       | 0        | 0        | 1       | 0      | 0      |
| Crinalium              | 1              | 21             | 0        | 0        | 0        | 0        | 0       | 0       | 0       | 0       | 0        | 0        | 0       | 0       | 0       | 0        | 0        | 0       | 0      | 0      |
| Croceibacter           | 2              | 80             | 0        | 0        | 0        | 0        | 0       | 0       | 0       | 0       | 0        | 0        | 0       | 0       | 0       | 0        | 0        | 1       | 1      | 0      |
| Crocospaera            | 1              | 6              | 0        | 0        | 0        | 0        | 0       | 0       | 0       | 0       | 0        | 0        | 0       | 0       | 0       | 0        | 0        | 0       | 0      | 0      |
| Cronobacter            | 2              | 120            | 0        | 0        | 0        | 0        | 0       | 0       | 0       | 0       | 1        | 0        | 0       | 0       | 0       | 0        | 0        | 1       | 0      | 0      |
| Cryptobacterium        | 2              | 39             | 0        | 0        | 0        | 0        | 0       | 0       | 0       | 0       | 0        | 0        | 0       | 0       | 0       | 0        | 0        | 1       | 0      | 0      |
| Cucumis                | 1              | 9              | 0        | 0        | 0        | 0        | 0       | 0       | 0       | 0       | 0        | 0        | 0       | 0       | 0       | 0        | 0        | 0       | 0      | 0      |
| Cupriavidus            | 3              | 317            | 1        | 1        | 0        | 0        | 1       | 1       | 0       | 1       | 0        | 0        | 1       | 1       | 1       | 1        | 0        | 1       | 0      | 1      |
| Curtobacterium         | 1              | 5              | 0        | 0        | 1        | 0        | 0       | 0       | 0       | 0       | 0        | 0        | 0       | 0       | 0       | 0        | 0        | 1       | 0      | 0      |
| Curvibacter            | 1              | 27             | 0        | 1        | 0        | 0        | 0       | 0       | 0       | 0       | 0        | 0        | 0       | 1       | 0       | 0        | 0        | 1       | 0      | 0      |
| Cyanobacterium         | 1              | 9              | 0        | 0        | 0        | 0        | 0       | 0       | 0       | 0       | 0        | 0        | 0       | 0       | 0       | 0        | 0        | 0       | 0      | 0      |
| Cyanobium              | 1              | 10             | 0        | 0        | 0        | 0        | 0       | 0       | 0       | 0       | 0        | 0        | 0       | 0       | 0       | 0        | 0        | 0       | 0      | 0      |
| Cyanothece             | 1              | 34             | 0        | 0        | 0        | 0        | 0       | 0       | 0       | 0       | 0        | 0        | 0       | 0       | 0       | 0        | 0        | 0       | 1      | 0      |
| Cyclobacterium         | 1              | 19             | 0        | 0        | 0        | 0        | 0       | 0       | 0       | 0       | 0        | 0        | 0       | 0       | 0       | 0        | 0        | 0       | 1      | 0      |
| Cycloclasticus         | 1              | 21             | 0        | 0        | 0        | 0        | 0       | 0       | 0       | 0       | 0        | 0        | 0       | 0       | 0       | 0        | 0        | 0       | 0      | 1      |
| Cylindrospermopsis     | 1              | 4              | 0        | 0        | 0        | 0        | 0       | 0       | 0       | 0       | 0        | 0        | 0       | 0       | 0       | 0        | 0        | 0       | 0      | 0      |
| Cylindrospermum        | 1              | 30             | 0        | 0        | 0        | 0        | 0       | 0       | 0       | 0       | 0        | 0        | 0       | 0       | 0       | 0        | 0        | 1       | 0      | 0      |

| Genus              | Cluster Number | Protein Counts | 4.2.1.80 | 4.2.1.83 | 4.2.1.84 | 4.99.1.7 | 5.1.2.2 | 5.2.1.2 | 5.3.3.1 | 5.3.3.4 | 5.3.99.- | 5.4.99.- | 5.5.1.1 | 5.5.1.2 | 6.2.1.- | 6.2.1.25 | 6.2.1.32 | 6.3.5.2 | K00002 | K00055 |
|--------------------|----------------|----------------|----------|----------|----------|----------|---------|---------|---------|---------|----------|----------|---------|---------|---------|----------|----------|---------|--------|--------|
| Cytophaga          | 2              | 69             | 0        | 0        | 0        | 0        | 0       | 0       | 0       | 0       | 1        | 0        | 1       | 0       | 0       | 0        | 0        | 1       | 0      | 0      |
| Dactylococcopsis   | 1              | 8              | 0        | 0        | 0        | 0        | 0       | 0       | 0       | 0       | 0        | 0        | 0       | 0       | 0       | 0        | 0        | 0       | 0      | 0      |
| Dechloromonas      | 1              | 40             | 0        | 0        | 0        | 0        | 0       | 0       | 0       | 0       | 0        | 0        | 0       | 0       | 0       | 0        | 0        | 0       | 0      | 0      |
| Dechlorosoma       | 1              | 19             | 0        | 0        | 0        | 0        | 0       | 0       | 0       | 0       | 0        | 0        | 0       | 0       | 0       | 0        | 0        | 0       | 0      | 0      |
| Deferribacter      | 2              | 73             | 0        | 0        | 0        | 0        | 0       | 0       | 0       | 0       | 0        | 0        | 0       | 0       | 0       | 0        | 0        | 1       | 0      | 0      |
| Dehalobacter       | 1              | 9              | 0        | 0        | 0        | 0        | 0       | 0       | 0       | 0       | 0        | 0        | 0       | 0       | 0       | 0        | 0        | 0       | 0      | 0      |
| Dehalococcoides    | 2              | 41             | 0        | 0        | 0        | 0        | 0       | 0       | 0       | 0       | 0        | 0        | 0       | 0       | 0       | 0        | 0        | 1       | 0      | 0      |
| Dehalogenimonas    | 1              | 37             | 0        | 0        | 0        | 0        | 0       | 0       | 0       | 0       | 0        | 0        | 0       | 0       | 0       | 0        | 0        | 1       | 0      | 0      |
| Deinococcus        | 2              | 140            | 0        | 0        | 0        | 0        | 0       | 0       | 0       | 0       | 1        | 0        | 1       | 1       | 0       | 0        | 0        | 1       | 0      | 0      |
| Delftia            | 3              | 177            | 1        | 1        | 0        | 0        | 1       | 1       | 0       | 1       | 1        | 0        | 1       | 1       | 0       | 1        | 0        | 1       | 0      | 0      |
| Denitrovibrio      | 2              | 67             | 0        | 0        | 0        | 0        | 0       | 0       | 0       | 0       | 0        | 0        | 0       | 0       | 1       | 0        | 0        | 1       | 0      | 0      |
| Desulfarculus      | 2              | 92             | 0        | 0        | 0        | 0        | 0       | 0       | 0       | 0       | 0        | 0        | 0       | 0       | 1       | 0        | 0        | 1       | 0      | 0      |
| Desulfatibacillum  | 3              | 84             | 0        | 0        | 0        | 0        | 0       | 0       | 0       | 0       | 0        | 0        | 0       | 0       | 1       | 0        | 0        | 1       | 0      | 0      |
| Desulfitobacterium | 2              | 102            | 0        | 0        | 0        | 0        | 0       | 0       | 0       | 0       | 0        | 0        | 0       | 0       | 0       | 0        | 0        | 1       | 0      | 0      |
| Desulfobacca       | 2              | 65             | 0        | 0        | 0        | 0        | 0       | 0       | 0       | 0       | 0        | 0        | 0       | 0       | 0       | 0        | 0        | 1       | 0      | 0      |
| Desulfobacterium   | 2              | 113            | 0        | 0        | 0        | 0        | 0       | 0       | 0       | 0       | 0        | 0        | 1       | 0       | 1       | 0        | 0        | 1       | 0      | 0      |
| Desulfobacula      | 1              | 21             | 0        | 0        | 0        | 0        | 0       | 0       | 0       | 0       | 0        | 0        | 0       | 0       | 0       | 0        | 0        | 0       | 0      | 0      |
| Desulfobulbus      | 2              | 88             | 0        | 0        | 0        | 0        | 0       | 0       | 0       | 0       | 0        | 0        | 0       | 0       | 1       | 0        | 0        | 1       | 1      | 0      |
| Desulfocapsa       | 1              | 9              | 0        | 0        | 0        | 0        | 0       | 0       | 0       | 0       | 0        | 0        | 0       | 0       | 0       | 0        | 0        | 0       | 0      | 0      |
| Desulfococcus      | 2              | 80             | 0        | 0        | 0        | 0        | 0       | 0       | 0       | 0       | 0        | 0        | 0       | 0       | 0       | 0        | 0        | 1       | 0      | 0      |
| Desulfohalobium    | 2              | 52             | 0        | 0        | 0        | 0        | 0       | 0       | 0       | 0       | 0        | 0        | 0       | 0       | 0       | 0        | 0        | 1       | 0      | 0      |
| Desulfomicrobium   | 2              | 65             | 0        | 0        | 0        | 0        | 0       | 0       | 0       | 0       | 0        | 0        | 0       | 0       | 0       | 0        | 0        | 1       | 0      | 0      |
| Desulfomonile      | 1              | 25             | 0        | 0        | 0        | 0        | 0       | 0       | 0       | 0       | 0        | 0        | 0       | 0       | 0       | 0        | 0        | 0       | 0      | 1      |
| Desulforhabdus     | 1              | 2              | 0        | 0        | 0        | 0        | 0       | 0       | 0       | 0       | 0        | 0        | 0       | 0       | 0       | 0        | 0        | 0       | 0      | 0      |
| Desulfosporosinus  | 1              | 30             | 0        | 0        | 0        | 0        | 0       | 0       | 0       | 0       | 0        | 0        | 0       | 0       | 0       | 0        | 0        | 0       | 0      | 0      |
| Desulfotalea       | 2              | 66             | 0        | 0        | 0        | 0        | 0       | 0       | 0       | 0       | 0        | 0        | 0       | 0       | 0       | 0        | 0        | 1       | 0      | 0      |
| Desulfotomaculum   | 2              | 98             | 0        | 0        | 0        | 0        | 0       | 0       | 0       | 0       | 0        | 0        | 0       | 0       | 0       | 0        | 0        | 1       | 0      | 1      |
| Desulfovibrio      | 2              | 144            | 0        | 0        | 0        | 0        | 0       | 0       | 0       | 0       | 0        | 0        | 1       | 0       | 0       | 1        | 0        | 1       | 0      | 0      |
| Desulfurispirillum | 2              | 78             | 0        | 0        | 0        | 0        | 0       | 0       | 0       | 0       | 0        | 0        | 0       | 0       | 0       | 0        | 0        | 1       | 0      | 0      |
| Desulfurivibrio    | 2              | 71             | 0        | 0        | 0        | 0        | 0       | 0       | 0       | 0       | 0        | 0        | 0       | 0       | 0       | 0        | 0        | 1       | 0      | 0      |
| Desulfurobacterium | 2              | 53             | 0        | 0        | 0        | 0        | 0       | 0       | 0       | 0       | 0        | 0        | 0       | 0       | 0       | 0        | 0        | 1       | 0      | 0      |
| Desulfurococcus    | 1              | 11             | 0        | 0        | 0        | 0        | 0       | 0       | 0       | 0       | 0        | 0        | 0       | 0       | 0       | 0        | 0        | 0       | 0      | 0      |
| Diaphorobacter     | 1              | 16             | 0        | 0        | 0        | 0        | 0       | 0       | 0       | 0       | 0        | 0        | 0       | 0       | 0       | 0        | 0        | 0       | 0      | 0      |
| Dichelobacter      | 2              | 45             | 0        | 0        | 0        | 0        | 0       | 0       | 0       | 0       | 0        | 0        | 0       | 0       | 0       | 0        | 0        | 1       | 0      | 0      |
| Dickeya            | 2              | 155            | 0        | 0        | 0        | 0        | 0       | 0       | 0       | 0       | 1        | 0        | 1       | 1       | 0       | 0        | 0        | 1       | 0      | 0      |
| Dictyoglomus       | 2              | 62             | 0        | 0        | 0        | 0        | 0       | 0       | 0       | 0       | 0        | 0        | 0       | 0       | 0       | 0        | 0        | 1       | 0      | 0      |
| Dinoroseobacter    | 3              | 148            | 0        | 0        | 1        | 0        | 1       | 1       | 0       | 0       | 0        | 0        | 0       | 1       | 0       | 0        | 0        | 1       | 0      | 0      |
| Dokdonia           | 1              | 3              | 0        | 0        | 0        | 0        | 0       | 0       | 0       | 0       | 0        | 0        | 0       | 0       | 0       | 0        | 0        | 0       | 0      | 0      |
| Dorea              | 1              | 7              | 0        | 0        | 0        | 0        | 0       | 0       | 0       | 0       | 0        | 0        | 0       | 0       | 0       | 0        | 0        | 0       | 0      | 0      |
| Dyadobacter        | 2              | 83             | 0        | 0        | 0        | 0        | 0       | 0       | 0       | 0       | 1        | 0        | 0       | 0       | 0       | 0        | 0        | 1       | 0      | 0      |
| Echinicola         | 1              | 20             | 0        | 0        | 0        | 0        | 0       | 0       | 0       | 0       | 0        | 0        | 0       | 0       | 0       | 0        | 0        | 0       | 0      | 0      |
| Edwardsiella       | 2              | 126            | 0        | 0        | 0        | 0        | 0       | 0       | 0       | 0       | 0        | 0        | 0       | 0       | 0       | 0        | 0        | 1       | 0      | 0      |
| Eggerthella        | 1              | 51             | 0        | 0        | 0        | 0        | 0       | 0       | 0       | 0       | 0        | 0        | 0       | 0       | 0       | 0        | 0        | 1       | 0      | 0      |
| Ehrlichia          | 2              | 37             | 0        | 0        | 0        | 0        | 0       | 0       | 0       | 0       | 0        | 0        | 0       | 0       | 0       | 0        | 0        | 1       | 0      | 0      |
| Eikenella          | 1              | 4              | 0        | 0        | 0        | 0        | 0       | 0       | 0       | 0       | 0        | 0        | 0       | 0       | 0       | 0        | 0        | 1       | 0      | 0      |
| Elusimicrobium     | 2              | 44             | 0        | 0        | 0        | 0        | 0       | 0       | 0       | 0       | 0        | 0        | 0       | 0       | 0       | 0        | 0        | 1       | 0      | 0      |
| Emticicia          | 1              | 21             | 0        | 0        | 0        | 0        | 0       | 0       | 0       | 0       | 0        | 0        | 0       | 0       | 0       | 0        | 0        | 0       | 0      | 0      |
| Enhydrobacter      | 1              | 1              | 0        | 0        | 0        | 0        | 0       | 0       | 0       | 0       | 0        | 0        | 0       | 0       | 0       | 0        | 0        | 0       | 0      | 0      |
| Ensifer            | 1              | 2              | 0        | 0        | 0        | 0        | 0       | 0       | 0       | 0       | 0        | 0        | 0       | 0       | 0       | 0        | 0        | 0       | 0      | 0      |
| Enterobacter       | 2              | 202            | 0        | 0        | 0        | 0        | 0       | 0       | 0       | 1       | 1        | 0        | 1       | 0       | 0       | 0        | 0        | 1       | 0      | 1      |
| Enterobacteriaceae | 2              | 211            | 0        | 0        | 0        | 0        | 0       | 0       | 0       | 1       | 1        | 0        | 1       | 0       | 0       | 0        | 0        | 1       | 0      | 0      |
| Enterococcus       | 1              | 187            | 0        | 0        | 0        | 0        | 0       | 0       | 0       | 1       | 1        | 0        | 1       | 0       | 0       | 0        | 0        | 1       | 0      | 1      |

| Genus               | Cluster Number | Protein Counts | 4.2.1.80 | 4.2.1.83 | 4.2.1.84 | 4.99.1.7 | 5.1.2.2 | 5.2.1.2 | 5.3.3.1 | 5.3.3.4 | 5.3.99.- | 5.4.99.- | 5.5.1.1 | 5.5.1.2 | 6.2.1.- | 6.2.1.25 | 6.2.1.32 | 6.3.5.2 | K00002 | K00055 |
|---------------------|----------------|----------------|----------|----------|----------|----------|---------|---------|---------|---------|----------|----------|---------|---------|---------|----------|----------|---------|--------|--------|
| Enterovibrio        | 1              | 15             | 0        | 0        | 0        | 0        | 0       | 0       | 0       | 0       | 0        | 0        | 0       | 0       | 0       | 0        | 0        | 1       | 0      | 0      |
| Erwinia             | 2              | 151            | 0        | 0        | 0        | 0        | 0       | 0       | 0       | 0       | 1        | 0        | 1       | 0       | 0       | 0        | 0        | 1       | 0      | 0      |
| Erysipelothrix      | 1              | 9              | 0        | 0        | 0        | 0        | 0       | 0       | 0       | 0       | 0        | 0        | 0       | 0       | 0       | 0        | 0        | 0       | 0      | 0      |
| Erysipelotrichaceae | 1              | 4              | 0        | 0        | 0        | 0        | 0       | 0       | 0       | 0       | 0        | 0        | 0       | 0       | 0       | 0        | 0        | 0       | 0      | 0      |
| Erythrobacter       | 2              | 80             | 0        | 0        | 0        | 0        | 0       | 1       | 0       | 0       | 0        | 0        | 0       | 0       | 1       | 0        | 0        | 1       | 0      | 0      |
| Escherichia         | 2              | 242            | 1        | 0        | 0        | 0        | 0       | 1       | 0       | 1       | 1        | 0        | 1       | 1       | 1       | 0        | 0        | 1       | 0      | 1      |
| Ethanoligenens      | 2              | 69             | 0        | 0        | 0        | 0        | 0       | 0       | 0       | 0       | 0        | 0        | 0       | 0       | 0       | 0        | 0        | 1       | 0      | 0      |
| Eubacteriaceae      | 1              | 2              | 0        | 0        | 0        | 0        | 0       | 0       | 0       | 0       | 0        | 0        | 0       | 0       | 0       | 0        | 0        | 0       | 0      | 0      |
| Eubacterium         | 2              | 103            | 0        | 0        | 0        | 0        | 0       | 0       | 0       | 0       | 0        | 0        | 1       | 0       | 0       | 0        | 0        | 1       | 0      | 0      |
| Eudoraea            | 1              | 4              | 0        | 0        | 0        | 0        | 0       | 0       | 0       | 0       | 1        | 0        | 0       | 0       | 0       | 0        | 0        | 0       | 0      | 0      |
| Euryarchaeota       | 1              | 1              | 0        | 0        | 0        | 0        | 0       | 0       | 0       | 0       | 0        | 0        | 0       | 0       | 0       | 0        | 0        | 0       | 0      | 0      |
| Exiguobacterium     | 2              | 93             | 0        | 0        | 0        | 0        | 0       | 0       | 0       | 0       | 0        | 0        | 0       | 0       | 0       | 0        | 0        | 1       | 0      | 0      |
| Faecalibacterium    | 1              | 12             | 0        | 0        | 0        | 0        | 0       | 0       | 0       | 0       | 0        | 0        | 0       | 0       | 0       | 0        | 0        | 0       | 0      | 0      |
| Ferrimonas          | 2              | 115            | 0        | 0        | 0        | 0        | 0       | 1       | 0       | 0       | 0        | 0        | 0       | 0       | 0       | 0        | 0        | 1       | 0      | 0      |
| Ferroglobus         | 1              | 14             | 0        | 0        | 0        | 0        | 0       | 0       | 0       | 0       | 0        | 0        | 0       | 0       | 0       | 0        | 0        | 0       | 0      | 0      |
| Ferroplasma         | 1              | 11             | 0        | 0        | 0        | 0        | 0       | 0       | 0       | 0       | 0        | 0        | 0       | 0       | 0       | 0        | 0        | 0       | 0      | 0      |
| Fervidicoccus       | 1              | 7              | 0        | 0        | 0        | 0        | 0       | 0       | 0       | 0       | 0        | 0        | 0       | 0       | 0       | 0        | 0        | 0       | 0      | 0      |
| Fervidobacterium    | 2              | 54             | 0        | 0        | 0        | 0        | 0       | 0       | 0       | 0       | 0        | 0        | 1       | 0       | 0       | 0        | 0        | 1       | 0      | 0      |
| Fibrella            | 1              | 17             | 0        | 0        | 0        | 0        | 0       | 0       | 0       | 0       | 0        | 0        | 0       | 0       | 0       | 0        | 0        | 0       | 0      | 0      |
| Fibrobacter         | 2              | 52             | 0        | 0        | 0        | 0        | 0       | 0       | 0       | 0       | 0        | 0        | 0       | 0       | 0       | 0        | 0        | 1       | 0      | 0      |
| Filifactor          | 1              | 9              | 0        | 0        | 0        | 0        | 0       | 0       | 0       | 0       | 0        | 0        | 0       | 0       | 0       | 0        | 0        | 0       | 0      | 0      |
| Finegoldia          | 2              | 55             | 0        | 0        | 0        | 0        | 0       | 0       | 0       | 0       | 0        | 0        | 0       | 0       | 0       | 0        | 0        | 1       | 0      | 0      |
| Firmicutes          | 1              | 15             | 0        | 0        | 0        | 0        | 0       | 0       | 0       | 0       | 0        | 0        | 0       | 0       | 0       | 0        | 0        | 0       | 0      | 0      |
| Fischerella         | 1              | 15             | 0        | 0        | 0        | 0        | 0       | 0       | 0       | 0       | 0        | 0        | 0       | 0       | 0       | 0        | 0        | 1       | 0      | 0      |
| Flavobacteria       | 1              | 7              | 0        | 0        | 0        | 0        | 0       | 0       | 0       | 0       | 0        | 0        | 0       | 0       | 0       | 0        | 0        | 0       | 0      | 0      |
| Flavobacteriaceae   | 2              | 69             | 0        | 0        | 0        | 0        | 0       | 0       | 0       | 0       | 0        | 0        | 1       | 0       | 0       | 0        | 0        | 1       | 0      | 0      |
| Flavobacteriales    | 1              | 3              | 0        | 0        | 0        | 0        | 0       | 0       | 0       | 0       | 0        | 0        | 0       | 0       | 0       | 0        | 0        | 0       | 0      | 0      |
| Flavobacterium      | 2              | 103            | 0        | 0        | 0        | 0        | 0       | 0       | 0       | 0       | 0        | 0        | 0       | 0       | 0       | 0        | 0        | 1       | 0      | 0      |
| Flexibacter         | 1              | 17             | 0        | 0        | 0        | 0        | 0       | 0       | 0       | 0       | 0        | 0        | 0       | 0       | 0       | 0        | 0        | 0       | 0      | 0      |
| Flexistipes         | 1              | 11             | 0        | 0        | 0        | 0        | 0       | 0       | 0       | 0       | 0        | 0        | 0       | 0       | 0       | 0        | 0        | 0       | 0      | 0      |
| Fluoribacter        | 1              | 6              | 0        | 0        | 0        | 0        | 0       | 0       | 0       | 0       | 0        | 0        | 0       | 0       | 0       | 0        | 0        | 0       | 0      | 0      |
| Fluviicola          | 2              | 69             | 0        | 0        | 0        | 0        | 0       | 0       | 0       | 0       | 0        | 0        | 0       | 0       | 0       | 0        | 0        | 1       | 0      | 0      |
| Formosa             | 1              | 2              | 0        | 0        | 0        | 0        | 0       | 0       | 0       | 0       | 0        | 0        | 0       | 0       | 0       | 0        | 0        | 0       | 0      | 0      |
| Francisella         | 2              | 88             | 1        | 0        | 0        | 0        | 0       | 1       | 0       | 0       | 0        | 0        | 1       | 0       | 0       | 0        | 0        | 1       | 0      | 0      |
| Frankia             | 3              | 202            | 0        | 0        | 0        | 0        | 1       | 0       | 0       | 0       | 1        | 0        | 0       | 1       | 0       | 0        | 0        | 1       | 0      | 1      |
| Frateuria           | 1              | 25             | 0        | 0        | 0        | 0        | 0       | 0       | 0       | 1       | 0        | 0        | 1       | 0       | 0       | 0        | 0        | 0       | 0      | 0      |
| Fructobacillus      | 1              | 2              | 0        | 0        | 0        | 0        | 0       | 0       | 0       | 0       | 0        | 0        | 0       | 0       | 0       | 0        | 0        | 0       | 0      | 0      |
| Fulvimarina         | 1              | 2              | 0        | 0        | 0        | 0        | 0       | 0       | 0       | 0       | 0        | 0        | 0       | 0       | 0       | 0        | 0        | 0       | 0      | 0      |
| Fusobacterium       | 1              | 48             | 0        | 0        | 0        | 0        | 0       | 0       | 0       | 0       | 0        | 0        | 0       | 0       | 0       | 0        | 0        | 1       | 0      | 0      |
| Gallibacterium      | 2              | 87             | 0        | 0        | 0        | 0        | 0       | 0       | 0       | 0       | 0        | 0        | 0       | 0       | 0       | 0        | 0        | 1       | 0      | 0      |
| Gallionella         | 2              | 67             | 0        | 0        | 0        | 0        | 0       | 0       | 0       | 0       | 0        | 0        | 0       | 0       | 0       | 0        | 0        | 1       | 0      | 0      |
| Gammaproteobacteria | 1              | 9              | 0        | 0        | 0        | 0        | 0       | 0       | 0       | 0       | 0        | 0        | 0       | 0       | 0       | 0        | 0        | 0       | 0      | 0      |
| Gardnerella         | 1              | 31             | 0        | 0        | 0        | 0        | 0       | 0       | 0       | 0       | 0        | 0        | 0       | 0       | 0       | 0        | 0        | 1       | 0      | 0      |
| Geitlerinema        | 1              | 9              | 0        | 0        | 0        | 0        | 0       | 0       | 0       | 0       | 0        | 0        | 0       | 0       | 0       | 0        | 0        | 0       | 0      | 0      |
| Gemmatimonas        | 2              | 93             | 0        | 0        | 0        | 0        | 0       | 0       | 0       | 0       | 0        | 0        | 1       | 0       | 0       | 0        | 0        | 1       | 0      | 0      |
| Geobacillus         | 2              | 168            | 0        | 0        | 0        | 0        | 0       | 0       | 0       | 0       | 1        | 0        | 0       | 0       | 1       | 1        | 0        | 1       | 0      | 0      |
| Geobacter           | 2              | 150            | 0        | 0        | 0        | 0        | 1       | 0       | 0       | 0       | 0        | 0        | 1       | 0       | 1       | 1        | 0        | 1       | 0      | 0      |
| Geodermatophilus    | 2              | 136            | 0        | 0        | 1        | 0        | 0       | 0       | 0       | 1       | 1        | 0        | 1       | 1       | 0       | 0        | 0        | 1       | 0      | 0      |
| Geopsychrobacter    | 1              | 2              | 0        | 0        | 0        | 0        | 0       | 0       | 0       | 0       | 0        | 0        | 0       | 0       | 0       | 0        | 0        | 0       | 0      | 0      |
| Gillisia            | 1              | 11             | 0        | 0        | 0        | 0        | 0       | 0       | 0       | 0       | 0        | 0        | 0       | 0       | 0       | 0        | 0        | 0       | 0      | 0      |
| Gilvimarinus        | 1              | 4              | 0        | 0        | 0        | 0        | 0       | 0       | 0       | 0       | 0        | 0        | 0       | 0       | 0       | 0        | 0        | 0       | 0      | 0      |
| Glaciecola          | 2              | 117            | 0        | 1        | 0        | 0        | 0       | 1       | 0       | 0       | 1        | 0        | 0       | 0       | 1       | 0        | 0        | 1       | 0      | 0      |

| Genus             | Cluster Number | Protein Counts | 4.2.1.80 | 4.2.1.83 | 4.2.1.84 | 4.99.1.7 | 5.1.2.2 | 5.2.1.2 | 5.3.3.1 | 5.3.3.4 | 5.3.99.- | 5.4.99.- | 5.5.1.1 | 5.5.1.2 | 6.2.1.- | 6.2.1.25 | 6.2.1.32 | 6.3.5.2 | K00002 | K00055 |
|-------------------|----------------|----------------|----------|----------|----------|----------|---------|---------|---------|---------|----------|----------|---------|---------|---------|----------|----------|---------|--------|--------|
| Gloeobacter       | 2              | 67             | 0        | 0        | 0        | 0        | 0       | 0       | 0       | 0       | 0        | 0        | 0       | 0       | 0       | 0        | 0        | 1       | 0      | 0      |
| Gloeocapsa        | 1              | 20             | 0        | 0        | 0        | 0        | 0       | 0       | 0       | 0       | 0        | 0        | 0       | 0       | 0       | 0        | 0        | 0       | 0      | 0      |
| Gloeotheca        | 1              | 1              | 0        | 0        | 0        | 0        | 0       | 0       | 0       | 0       | 0        | 0        | 0       | 0       | 0       | 0        | 0        | 0       | 0      | 0      |
| Gluconacetobacter | 2              | 96             | 0        | 0        | 0        | 0        | 0       | 0       | 0       | 0       | 0        | 0        | 0       | 1       | 0       | 0        | 0        | 1       | 0      | 0      |
| Gluconobacter     | 2              | 76             | 0        | 0        | 0        | 0        | 0       | 0       | 0       | 0       | 0        | 0        | 0       | 0       | 0       | 0        | 0        | 1       | 0      | 0      |
| Gordonia          | 1              | 158            | 0        | 0        | 0        | 0        | 0       | 0       | 0       | 1       | 0        | 0        | 1       | 0       | 0       | 0        | 0        | 1       | 0      | 1      |
| Gordonibacter     | 1              | 32             | 0        | 0        | 0        | 0        | 0       | 0       | 0       | 0       | 0        | 0        | 1       | 0       | 0       | 0        | 0        | 1       | 0      | 1      |
| Gramella          | 2              | 104            | 0        | 0        | 0        | 0        | 0       | 0       | 0       | 0       | 1        | 0        | 0       | 0       | 0       | 0        | 0        | 1       | 1      | 0      |
| Granulibacter     | 2              | 90             | 0        | 0        | 0        | 0        | 0       | 0       | 0       | 0       | 0        | 0        | 0       | 0       | 0       | 0        | 0        | 1       | 0      | 0      |
| Granulicella      | 2              | 98             | 0        | 0        | 0        | 0        | 1       | 0       | 0       | 0       | 0        | 0        | 0       | 0       | 0       | 0        | 0        | 1       | 0      | 0      |
| Grimontia         | 1              | 9              | 0        | 0        | 0        | 0        | 0       | 0       | 0       | 0       | 0        | 0        | 0       | 0       | 0       | 0        | 0        | 0       | 0      | 0      |
| Haemophilus       | 2              | 117            | 0        | 0        | 0        | 0        | 0       | 0       | 0       | 0       | 0        | 0        | 0       | 0       | 0       | 0        | 0        | 1       | 0      | 0      |
| Hafnia            | 1              | 29             | 0        | 0        | 0        | 0        | 0       | 0       | 0       | 0       | 0        | 0        | 0       | 0       | 0       | 0        | 0        | 1       | 0      | 0      |
| Hahella           | 3              | 130            | 0        | 0        | 0        | 0        | 0       | 1       | 0       | 0       | 1        | 0        | 0       | 0       | 0       | 0        | 0        | 1       | 0      | 0      |
| Halalkalicoccus   | 1              | 18             | 0        | 0        | 0        | 0        | 0       | 0       | 0       | 0       | 0        | 0        | 0       | 0       | 0       | 0        | 0        | 0       | 0      | 0      |
| Halanaerobium     | 2              | 89             | 0        | 0        | 0        | 0        | 0       | 0       | 0       | 0       | 0        | 0        | 0       | 0       | 0       | 0        | 0        | 1       | 0      | 0      |
| Haliangium        | 2              | 108            | 0        | 0        | 0        | 0        | 0       | 1       | 0       | 0       | 0        | 1        | 0       | 0       | 0       | 1        | 0        | 1       | 0      | 1      |
| Haliscomenobacter | 2              | 107            | 0        | 0        | 0        | 0        | 0       | 0       | 0       | 0       | 1        | 0        | 0       | 1       | 0       | 0        | 0        | 1       | 0      | 0      |
| Haloarcula        | 1              | 22             | 0        | 0        | 0        | 0        | 0       | 0       | 0       | 0       | 0        | 0        | 0       | 0       | 0       | 0        | 0        | 0       | 0      | 0      |
| Halobacillus      | 1              | 19             | 0        | 0        | 0        | 0        | 0       | 0       | 0       | 0       | 0        | 0        | 0       | 0       | 0       | 0        | 0        | 0       | 0      | 0      |
| Halobacteriaceae  | 1              | 1              | 0        | 0        | 0        | 0        | 0       | 0       | 0       | 0       | 0        | 0        | 0       | 0       | 0       | 0        | 0        | 0       | 0      | 0      |
| Halobacterium     | 1              | 10             | 0        | 0        | 0        | 0        | 0       | 0       | 0       | 0       | 0        | 0        | 0       | 0       | 0       | 0        | 0        | 0       | 0      | 0      |
| Halobacteroides   | 1              | 14             | 0        | 0        | 0        | 0        | 0       | 0       | 0       | 0       | 0        | 0        | 0       | 0       | 0       | 0        | 0        | 0       | 0      | 0      |
| Haloferax         | 1              | 20             | 0        | 0        | 0        | 0        | 0       | 0       | 0       | 0       | 0        | 0        | 0       | 0       | 0       | 0        | 0        | 0       | 0      | 1      |
| Halogeometricum   | 1              | 12             | 0        | 0        | 0        | 0        | 0       | 0       | 0       | 0       | 0        | 0        | 0       | 0       | 0       | 0        | 0        | 0       | 0      | 0      |
| Halomicrobium     | 1              | 10             | 0        | 0        | 0        | 0        | 0       | 0       | 0       | 0       | 0        | 0        | 0       | 0       | 0       | 0        | 0        | 0       | 0      | 0      |
| Halomonas         | 1              | 149            | 0        | 0        | 0        | 0        | 1       | 0       | 0       | 0       | 1        | 0        | 0       | 1       | 0       | 0        | 0        | 1       | 0      | 0      |
| Halopiger         | 1              | 16             | 0        | 0        | 0        | 0        | 0       | 0       | 0       | 0       | 0        | 0        | 0       | 0       | 0       | 0        | 0        | 0       | 0      | 0      |
| Haloquadratum     | 1              | 19             | 0        | 0        | 0        | 0        | 0       | 0       | 0       | 0       | 0        | 0        | 0       | 0       | 0       | 0        | 0        | 0       | 0      | 0      |
| Halorhabdus       | 1              | 10             | 0        | 0        | 0        | 0        | 0       | 0       | 0       | 0       | 0        | 0        | 0       | 0       | 0       | 0        | 0        | 0       | 0      | 0      |
| Halorhodospira    | 2              | 71             | 0        | 0        | 0        | 0        | 0       | 0       | 0       | 0       | 0        | 0        | 0       | 0       | 0       | 0        | 0        | 1       | 0      | 0      |
| Halorubrum        | 1              | 16             | 0        | 0        | 0        | 0        | 0       | 0       | 0       | 0       | 0        | 0        | 0       | 0       | 0       | 0        | 0        | 0       | 0      | 0      |
| Haloterrigena     | 1              | 19             | 0        | 0        | 0        | 0        | 0       | 0       | 0       | 0       | 0        | 0        | 0       | 0       | 0       | 0        | 0        | 0       | 0      | 0      |
| Halothece         | 1              | 9              | 0        | 0        | 0        | 0        | 0       | 0       | 0       | 0       | 0        | 0        | 0       | 0       | 0       | 0        | 0        | 0       | 0      | 0      |
| Halothermothrix   | 2              | 50             | 0        | 0        | 0        | 0        | 0       | 0       | 0       | 0       | 0        | 0        | 0       | 0       | 0       | 0        | 0        | 1       | 0      | 0      |
| Halothiobacillus  | 2              | 65             | 0        | 0        | 0        | 0        | 0       | 0       | 0       | 0       | 0        | 0        | 0       | 0       | 0       | 0        | 0        | 1       | 0      | 0      |
| Halovivax         | 1              | 12             | 0        | 0        | 0        | 0        | 0       | 0       | 0       | 0       | 0        | 0        | 0       | 0       | 0       | 0        | 0        | 0       | 0      | 0      |
| Helicobacter      | 2              | 79             | 0        | 0        | 0        | 0        | 0       | 0       | 0       | 0       | 0        | 0        | 0       | 0       | 0       | 0        | 0        | 1       | 1      | 0      |
| Heliobacillus     | 1              | 4              | 0        | 0        | 0        | 0        | 0       | 0       | 0       | 0       | 0        | 0        | 0       | 0       | 0       | 0        | 0        | 0       | 0      | 0      |
| Heliobacterium    | 2              | 51             | 0        | 0        | 0        | 0        | 0       | 0       | 0       | 0       | 0        | 0        | 0       | 0       | 0       | 0        | 0        | 1       | 0      | 0      |
| Herbaspirillum    | 2              | 172            | 0        | 0        | 1        | 0        | 0       | 0       | 0       | 1       | 0        | 0        | 1       | 1       | 1       | 0        | 0        | 1       | 0      | 0      |
| Herminiimonas     | 3              | 89             | 0        | 0        | 0        | 0        | 0       | 0       | 0       | 0       | 0        | 0        | 0       | 0       | 0       | 0        | 0        | 1       | 0      | 0      |
| Herpetosiphon     | 3              | 90             | 0        | 0        | 0        | 0        | 0       | 0       | 0       | 0       | 0        | 0        | 0       | 0       | 0       | 0        | 0        | 1       | 0      | 0      |
| Hippea            | 2              | 44             | 0        | 0        | 0        | 0        | 0       | 0       | 0       | 0       | 0        | 0        | 0       | 0       | 0       | 0        | 0        | 1       | 0      | 0      |
| Hirschia          | 2              | 102            | 0        | 1        | 0        | 0        | 0       | 1       | 0       | 0       | 0        | 0        | 0       | 0       | 0       | 0        | 0        | 1       | 0      | 0      |
| Histophilus       | 2              | 72             | 0        | 0        | 0        | 0        | 0       | 0       | 0       | 0       | 0        | 0        | 0       | 0       | 0       | 0        | 0        | 1       | 0      | 0      |
| Hoeflea           | 1              | 16             | 0        | 0        | 0        | 0        | 0       | 0       | 0       | 0       | 0        | 0        | 0       | 0       | 0       | 0        | 0        | 0       | 0      | 0      |
| Hydrogenivirga    | 1              | 2              | 0        | 0        | 0        | 0        | 0       | 0       | 0       | 0       | 0        | 0        | 0       | 0       | 0       | 0        | 0        | 0       | 0      | 0      |
| Hydrogenobacter   | 2              | 55             | 0        | 0        | 0        | 0        | 0       | 0       | 0       | 0       | 0        | 0        | 0       | 0       | 0       | 0        | 0        | 1       | 0      | 0      |
| Hydrogenobaculum  | 2              | 44             | 0        | 0        | 0        | 0        | 0       | 0       | 0       | 0       | 0        | 0        | 0       | 0       | 0       | 0        | 0        | 1       | 0      | 0      |
| Hydrogenophaga    | 1              | 9              | 0        | 0        | 0        | 0        | 0       | 0       | 0       | 0       | 0        | 0        | 0       | 0       | 0       | 0        | 0        | 1       | 0      | 0      |
| Hylemonella       | 1              | 4              | 0        | 0        | 0        | 0        | 0       | 0       | 0       | 0       | 0        | 0        | 0       | 0       | 0       | 0        | 0        | 1       | 0      | 0      |

| Genus                 | Cluster Number | Protein Counts | 4.2.1.80 | 4.2.1.83 | 4.2.1.84 | 4.99.1.7 | 5.1.2.2 | 5.2.1.2 | 5.3.3.1 | 5.3.3.4 | 5.3.99.- | 5.4.99.- | 5.5.1.1 | 5.5.1.2 | 6.2.1.- | 6.2.1.25 | 6.2.1.32 | 6.3.5.2 | K00002 | K00055 |
|-----------------------|----------------|----------------|----------|----------|----------|----------|---------|---------|---------|---------|----------|----------|---------|---------|---------|----------|----------|---------|--------|--------|
| Hyperthermus          | 1              | 6              | 0        | 0        | 0        | 0        | 0       | 0       | 0       | 0       | 0        | 0        | 0       | 0       | 0       | 0        | 0        | 0       | 0      | 0      |
| Hyphomicrobium        | 2              | 93             | 0        | 0        | 0        | 0        | 0       | 0       | 0       | 0       | 0        | 0        | 1       | 0       | 0       | 0        | 0        | 1       | 0      | 0      |
| Hyphomonas            | 3              | 105            | 0        | 0        | 0        | 0        | 0       | 0       | 0       | 0       | 0        | 0        | 0       | 0       | 0       | 0        | 0        | 1       | 0      | 1      |
| Ideonella             | 1              | 18             | 0        | 1        | 0        | 0        | 0       | 0       | 0       | 0       | 0        | 0        | 0       | 0       | 0       | 0        | 0        | 0       | 0      | 0      |
| Idiomarina            | 2              | 86             | 0        | 0        | 0        | 0        | 0       | 1       | 0       | 0       | 0        | 0        | 0       | 0       | 0       | 0        | 0        | 1       | 0      | 0      |
| Ignavibacterium       | 1              | 14             | 0        | 0        | 0        | 0        | 0       | 0       | 0       | 0       | 0        | 0        | 0       | 0       | 0       | 0        | 0        | 0       | 0      | 0      |
| Ignicoccus            | 1              | 5              | 0        | 0        | 0        | 0        | 0       | 0       | 0       | 0       | 0        | 0        | 0       | 0       | 0       | 0        | 0        | 0       | 0      | 0      |
| Ignisphaera           | 1              | 8              | 0        | 0        | 0        | 0        | 0       | 0       | 0       | 0       | 0        | 0        | 0       | 0       | 0       | 0        | 0        | 0       | 0      | 0      |
| Ilyobacter            | 2              | 85             | 0        | 0        | 0        | 0        | 0       | 0       | 0       | 0       | 1        | 0        | 0       | 0       | 0       | 0        | 0        | 1       | 0      | 0      |
| Intrasporangium       | 2              | 114            | 0        | 0        | 0        | 0        | 0       | 0       | 0       | 0       | 0        | 0        | 0       | 0       | 0       | 0        | 0        | 1       | 0      | 0      |
| Isoptericola          | 1              | 18             | 0        | 0        | 0        | 0        | 0       | 0       | 0       | 0       | 0        | 0        | 0       | 0       | 0       | 0        | 0        | 0       | 0      | 0      |
| Isosphaera            | 2              | 75             | 0        | 0        | 0        | 0        | 0       | 0       | 0       | 0       | 1        | 0        | 1       | 0       | 0       | 0        | 0        | 1       | 0      | 0      |
| Jannaschia            | 3              | 151            | 0        | 0        | 0        | 0        | 0       | 1       | 0       | 1       | 1        | 0        | 1       | 1       | 0       | 1        | 0        | 1       | 0      | 0      |
| Janthinobacterium     | 2              | 99             | 0        | 0        | 0        | 0        | 0       | 0       | 0       | 0       | 0        | 0        | 0       | 0       | 0       | 0        | 0        | 1       | 0      | 0      |
| Jonesia               | 2              | 56             | 0        | 0        | 0        | 0        | 0       | 0       | 0       | 0       | 0        | 0        | 0       | 0       | 0       | 0        | 0        | 1       | 0      | 0      |
| Joostella             | 1              | 3              | 0        | 0        | 0        | 0        | 0       | 0       | 0       | 0       | 0        | 0        | 0       | 0       | 0       | 0        | 0        | 0       | 0      | 0      |
| Kaistia               | 1              | 2              | 0        | 0        | 0        | 0        | 0       | 0       | 0       | 0       | 0        | 0        | 0       | 0       | 0       | 0        | 0        | 0       | 0      | 0      |
| Kangiella             | 2              | 84             | 0        | 0        | 0        | 0        | 0       | 1       | 0       | 0       | 0        | 0        | 0       | 0       | 0       | 0        | 0        | 1       | 0      | 0      |
| Ketogulonicigenium    | 2              | 102            | 0        | 0        | 0        | 0        | 0       | 0       | 0       | 0       | 1        | 0        | 0       | 1       | 0       | 0        | 0        | 1       | 0      | 0      |
| Kineococcus           | 1              | 24             | 0        | 0        | 0        | 0        | 0       | 0       | 0       | 0       | 0        | 0        | 0       | 0       | 0       | 0        | 0        | 0       | 0      | 0      |
| Kinetoplastibacterium | 1              | 2              | 0        | 0        | 0        | 0        | 0       | 0       | 0       | 0       | 0        | 0        | 0       | 0       | 0       | 0        | 0        | 0       | 0      | 0      |
| Kingella              | 1              | 4              | 0        | 0        | 0        | 0        | 0       | 0       | 0       | 0       | 0        | 0        | 0       | 0       | 0       | 0        | 0        | 1       | 0      | 0      |
| Kitasatospora         | 1              | 36             | 0        | 0        | 0        | 0        | 0       | 0       | 0       | 0       | 0        | 0        | 0       | 0       | 0       | 0        | 0        | 1       | 0      | 0      |
| Klebsiella            | 3              | 222            | 0        | 0        | 1        | 0        | 0       | 0       | 0       | 1       | 1        | 0        | 1       | 1       | 1       | 0        | 0        | 1       | 0      | 1      |
| Kluyvera              | 1              | 1              | 0        | 0        | 0        | 0        | 0       | 0       | 0       | 0       | 0        | 0        | 0       | 0       | 0       | 0        | 0        | 0       | 0      | 0      |
| Kocuria               | 2              | 87             | 0        | 0        | 0        | 0        | 0       | 0       | 0       | 0       | 0        | 0        | 0       | 1       | 0       | 0        | 0        | 1       | 1      | 0      |
| Kordia                | 1              | 5              | 0        | 0        | 0        | 0        | 0       | 0       | 0       | 0       | 0        | 0        | 0       | 0       | 0       | 0        | 0        | 0       | 0      | 0      |
| Kosmotoga             | 2              | 61             | 0        | 0        | 0        | 0        | 0       | 0       | 0       | 0       | 0        | 0        | 1       | 0       | 0       | 0        | 0        | 1       | 0      | 0      |
| Kribbella             | 2              | 99             | 0        | 0        | 0        | 0        | 0       | 0       | 0       | 0       | 1        | 0        | 0       | 0       | 0       | 0        | 0        | 1       | 0      | 0      |
| Krokinobacter         | 2              | 90             | 0        | 0        | 0        | 0        | 0       | 0       | 0       | 0       | 1        | 0        | 0       | 0       | 0       | 0        | 0        | 1       | 0      | 0      |
| Kyrpidia              | 2              | 113            | 0        | 0        | 0        | 0        | 0       | 0       | 0       | 0       | 0        | 0        | 0       | 0       | 0       | 0        | 0        | 1       | 0      | 0      |
| Kytococcus            | 2              | 70             | 0        | 0        | 0        | 0        | 0       | 0       | 0       | 0       | 0        | 0        | 0       | 0       | 0       | 0        | 0        | 1       | 0      | 0      |
| Labrenzia             | 1              | 4              | 0        | 0        | 0        | 0        | 0       | 0       | 0       | 0       | 0        | 0        | 0       | 0       | 0       | 0        | 0        | 0       | 0      | 0      |
| Lachnoanaerobaculum   | 1              | 1              | 0        | 0        | 0        | 0        | 0       | 0       | 0       | 0       | 0        | 0        | 0       | 0       | 0       | 0        | 0        | 0       | 0      | 0      |
| Lachnospiraceae       | 1              | 51             | 0        | 0        | 0        | 0        | 0       | 0       | 0       | 0       | 1        | 0        | 0       | 0       | 0       | 0        | 0        | 0       | 0      | 0      |
| Lacinutrix            | 1              | 20             | 0        | 0        | 0        | 0        | 0       | 0       | 0       | 0       | 0        | 0        | 0       | 0       | 0       | 0        | 0        | 0       | 0      | 0      |
| Lactobacillus         | 2              | 119            | 0        | 0        | 0        | 0        | 0       | 0       | 0       | 0       | 1        | 0        | 1       | 0       | 0       | 0        | 0        | 1       | 0      | 1      |
| Lactococcus           | 2              | 82             | 0        | 0        | 0        | 0        | 0       | 0       | 0       | 0       | 0        | 0        | 0       | 0       | 0       | 0        | 0        | 1       | 0      | 0      |
| Lamprocystis          | 1              | 2              | 0        | 0        | 0        | 0        | 0       | 0       | 0       | 0       | 0        | 0        | 0       | 0       | 0       | 0        | 0        | 0       | 0      | 0      |
| Laribacter            | 2              | 80             | 0        | 0        | 0        | 0        | 0       | 0       | 0       | 0       | 0        | 0        | 0       | 0       | 0       | 0        | 0        | 1       | 0      | 0      |
| Lawsonia              | 2              | 33             | 0        | 0        | 0        | 0        | 0       | 0       | 0       | 0       | 0        | 0        | 0       | 0       | 0       | 0        | 0        | 1       | 0      | 0      |
| Leadbetterella        | 2              | 79             | 0        | 0        | 0        | 0        | 0       | 0       | 0       | 0       | 1        | 0        | 1       | 0       | 0       | 0        | 0        | 1       | 0      | 0      |
| Leeuwenhoekiiella     | 1              | 2              | 0        | 0        | 0        | 0        | 0       | 0       | 0       | 0       | 0        | 0        | 0       | 0       | 0       | 0        | 0        | 0       | 0      | 0      |
| Legionella            | 2              | 117            | 0        | 0        | 1        | 0        | 0       | 0       | 0       | 0       | 0        | 0        | 1       | 0       | 0       | 0        | 0        | 1       | 0      | 0      |
| Leifsonia             | 2              | 48             | 0        | 0        | 0        | 0        | 0       | 0       | 0       | 0       | 1        | 0        | 0       | 0       | 0       | 0        | 0        | 1       | 0      | 0      |
| Leptolyngbya          | 1              | 10             | 0        | 0        | 0        | 0        | 0       | 0       | 0       | 0       | 0        | 0        | 0       | 0       | 0       | 0        | 0        | 0       | 0      | 0      |
| Leptospira            | 2              | 76             | 0        | 0        | 0        | 0        | 0       | 1       | 0       | 0       | 0        | 0        | 0       | 0       | 0       | 0        | 0        | 1       | 0      | 0      |
| Leptospirillum        | 1              | 10             | 0        | 0        | 0        | 0        | 0       | 0       | 0       | 0       | 0        | 0        | 0       | 0       | 0       | 0        | 0        | 0       | 0      | 0      |
| Leptothrix            | 3              | 186            | 0        | 1        | 0        | 0        | 0       | 1       | 0       | 0       | 1        | 0        | 0       | 1       | 1       | 1        | 0        | 1       | 0      | 0      |
| Leptotrichia          | 2              | 43             | 0        | 0        | 0        | 0        | 0       | 0       | 0       | 0       | 0        | 0        | 0       | 0       | 0       | 0        | 0        | 1       | 0      | 0      |
| Leucobacter           | 1              | 2              | 0        | 0        | 0        | 0        | 0       | 0       | 0       | 0       | 0        | 0        | 0       | 0       | 0       | 0        | 0        | 0       | 0      | 0      |
| Leuconostoc           | 2              | 64             | 0        | 0        | 0        | 0        | 0       | 0       | 0       | 0       | 0        | 0        | 0       | 0       | 0       | 0        | 0        | 1       | 0      | 0      |

| Genus                | Cluster Number | Protein Counts | 4.2.1.80 | 4.2.1.83 | 4.2.1.84 | 4.99.1.7 | 5.1.2.2 | 5.2.1.2 | 5.3.3.1 | 5.3.3.4 | 5.3.99.- | 5.4.99.- | 5.5.1.1 | 5.5.1.2 | 6.2.1.- | 6.2.1.25 | 6.2.1.32 | 6.3.5.2 | K00002 | K00055 |
|----------------------|----------------|----------------|----------|----------|----------|----------|---------|---------|---------|---------|----------|----------|---------|---------|---------|----------|----------|---------|--------|--------|
| Liberibacter         | 1              | 4              | 0        | 0        | 0        | 0        | 0       | 0       | 0       | 0       | 0        | 0        | 0       | 0       | 0       | 0        | 0        | 0       | 0      | 0      |
| Limnohabitans        | 1              | 11             | 0        | 0        | 0        | 0        | 0       | 0       | 0       | 0       | 0        | 0        | 0       | 0       | 0       | 0        | 0        | 1       | 0      | 0      |
| Listeria             | 2              | 77             | 0        | 0        | 0        | 0        | 0       | 0       | 0       | 0       | 1        | 0        | 1       | 0       | 0       | 0        | 0        | 1       | 0      | 0      |
| Listeriaceae         | 1              | 6              | 0        | 0        | 0        | 0        | 0       | 0       | 0       | 0       | 0        | 0        | 0       | 0       | 0       | 0        | 0        | 1       | 0      | 0      |
| Listonella           | 1              | 38             | 0        | 0        | 0        | 0        | 0       | 0       | 0       | 0       | 0        | 0        | 0       | 0       | 0       | 0        | 0        | 1       | 0      | 0      |
| Loktanella           | 1              | 3              | 0        | 0        | 0        | 0        | 0       | 0       | 0       | 0       | 0        | 0        | 0       | 0       | 0       | 0        | 0        | 0       | 0      | 0      |
| Lysinibacillus       | 2              | 97             | 0        | 0        | 0        | 0        | 0       | 0       | 0       | 0       | 0        | 0        | 1       | 0       | 1       | 0        | 0        | 1       | 0      | 0      |
| Macrococcus          | 2              | 60             | 0        | 0        | 0        | 0        | 0       | 0       | 0       | 0       | 1        | 0        | 1       | 0       | 0       | 0        | 0        | 1       | 0      | 0      |
| Magnetococcus        | 2              | 64             | 0        | 0        | 0        | 0        | 0       | 0       | 0       | 0       | 0        | 0        | 0       | 0       | 0       | 0        | 0        | 1       | 0      | 0      |
| Magnetospirillum     | 2              | 113            | 0        | 1        | 0        | 0        | 0       | 0       | 0       | 0       | 0        | 0        | 0       | 0       | 0       | 1        | 0        | 1       | 0      | 0      |
| Mahella              | 2              | 58             | 0        | 0        | 0        | 0        | 0       | 0       | 0       | 0       | 1        | 0        | 0       | 0       | 0       | 0        | 0        | 1       | 0      | 0      |
| Mannheimia           | 2              | 85             | 0        | 0        | 0        | 0        | 0       | 0       | 0       | 0       | 1        | 0        | 0       | 0       | 0       | 0        | 0        | 1       | 0      | 0      |
| Maribacter           | 3              | 87             | 0        | 0        | 0        | 0        | 0       | 0       | 0       | 0       | 1        | 0        | 0       | 0       | 0       | 0        | 0        | 1       | 0      | 0      |
| Maricaulis           | 3              | 87             | 0        | 0        | 0        | 0        | 0       | 1       | 0       | 0       | 0        | 0        | 0       | 0       | 0       | 0        | 0        | 1       | 0      | 0      |
| Marichromatium       | 1              | 2              | 0        | 0        | 0        | 0        | 0       | 0       | 0       | 0       | 0        | 0        | 0       | 0       | 0       | 0        | 0        | 0       | 0      | 0      |
| Marinithermus        | 2              | 77             | 0        | 0        | 0        | 0        | 0       | 0       | 0       | 0       | 0        | 0        | 1       | 0       | 0       | 0        | 0        | 1       | 0      | 0      |
| Marinitoga           | 1              | 15             | 0        | 0        | 0        | 0        | 0       | 0       | 0       | 0       | 0        | 0        | 0       | 0       | 0       | 0        | 0        | 0       | 0      | 0      |
| Marinobacter         | 2              | 163            | 0        | 0        | 0        | 0        | 0       | 1       | 0       | 0       | 0        | 0        | 0       | 0       | 1       | 0        | 0        | 1       | 0      | 0      |
| Marinomonas          | 3              | 192            | 0        | 1        | 0        | 0        | 0       | 0       | 0       | 1       | 1        | 0        | 1       | 0       | 0       | 0        | 0        | 1       | 0      | 1      |
| Maritimibacter       | 1              | 7              | 0        | 0        | 0        | 0        | 0       | 0       | 0       | 0       | 0        | 0        | 0       | 0       | 0       | 0        | 0        | 0       | 0      | 0      |
| Marivirga            | 2              | 96             | 0        | 0        | 0        | 0        | 0       | 0       | 0       | 0       | 0        | 0        | 0       | 0       | 0       | 0        | 0        | 1       | 1      | 0      |
| Martelella           | 1              | 3              | 0        | 0        | 0        | 0        | 0       | 0       | 0       | 0       | 0        | 0        | 0       | 0       | 0       | 0        | 0        | 0       | 0      | 0      |
| Marvinbryantia       | 1              | 1              | 0        | 0        | 0        | 0        | 0       | 0       | 0       | 0       | 0        | 0        | 0       | 0       | 0       | 0        | 0        | 0       | 0      | 0      |
| Massilia             | 1              | 4              | 0        | 0        | 0        | 0        | 0       | 0       | 0       | 0       | 0        | 0        | 0       | 0       | 0       | 0        | 0        | 0       | 0      | 0      |
| Mastigocladopsis     | 1              | 16             | 0        | 0        | 0        | 0        | 0       | 0       | 0       | 0       | 0        | 0        | 0       | 0       | 0       | 0        | 0        | 0       | 0      | 0      |
| Megamonas            | 1              | 47             | 0        | 0        | 0        | 0        | 0       | 0       | 0       | 0       | 1        | 0        | 0       | 0       | 0       | 0        | 0        | 1       | 0      | 0      |
| Megasphaera          | 1              | 14             | 0        | 0        | 0        | 0        | 0       | 0       | 0       | 0       | 0        | 0        | 0       | 0       | 0       | 0        | 0        | 0       | 0      | 0      |
| Meiothermus          | 2              | 110            | 0        | 0        | 0        | 0        | 0       | 0       | 0       | 0       | 1        | 0        | 1       | 1       | 0       | 0        | 0        | 1       | 0      | 0      |
| Melissococcus        | 2              | 46             | 0        | 0        | 0        | 0        | 0       | 0       | 0       | 0       | 0        | 0        | 0       | 0       | 0       | 0        | 0        | 1       | 0      | 0      |
| Mesoflavibacter      | 1              | 6              | 0        | 0        | 0        | 0        | 0       | 0       | 0       | 0       | 0        | 0        | 0       | 0       | 0       | 0        | 0        | 0       | 0      | 0      |
| Mesoplasma           | 1              | 23             | 0        | 0        | 0        | 0        | 0       | 0       | 0       | 0       | 0        | 0        | 0       | 0       | 0       | 0        | 0        | 1       | 0      | 0      |
| Mesorhizobium        | 2              | 201            | 0        | 0        | 1        | 0        | 0       | 1       | 0       | 1       | 1        | 0        | 1       | 1       | 0       | 0        | 0        | 1       | 0      | 0      |
| Mesotoga             | 1              | 14             | 0        | 0        | 0        | 0        | 0       | 0       | 0       | 0       | 0        | 0        | 0       | 0       | 0       | 0        | 0        | 0       | 0      | 0      |
| Metallosphaera       | 1              | 18             | 0        | 0        | 0        | 0        | 0       | 0       | 0       | 0       | 0        | 0        | 0       | 0       | 0       | 0        | 0        | 0       | 0      | 0      |
| Methanobacterium     | 1              | 7              | 0        | 0        | 0        | 0        | 0       | 0       | 0       | 0       | 0        | 0        | 0       | 0       | 0       | 0        | 0        | 0       | 0      | 0      |
| Methanobrevibacter   | 1              | 9              | 0        | 0        | 0        | 0        | 0       | 0       | 0       | 0       | 0        | 0        | 0       | 0       | 0       | 0        | 0        | 0       | 0      | 0      |
| Methanocaldococcus   | 1              | 6              | 0        | 0        | 0        | 0        | 0       | 0       | 0       | 0       | 0        | 0        | 0       | 0       | 0       | 0        | 0        | 0       | 0      | 0      |
| Methanocella         | 1              | 15             | 0        | 0        | 0        | 0        | 0       | 0       | 0       | 0       | 0        | 0        | 0       | 0       | 0       | 0        | 0        | 0       | 0      | 0      |
| Methanococcaceae     | 1              | 1              | 0        | 0        | 0        | 0        | 0       | 0       | 0       | 0       | 0        | 0        | 0       | 0       | 0       | 0        | 0        | 0       | 0      | 0      |
| Methanococcoides     | 1              | 5              | 0        | 0        | 0        | 0        | 0       | 0       | 0       | 0       | 0        | 0        | 0       | 0       | 0       | 0        | 0        | 0       | 0      | 0      |
| Methanococcus        | 1              | 9              | 0        | 0        | 0        | 0        | 0       | 0       | 0       | 0       | 0        | 0        | 0       | 0       | 0       | 0        | 0        | 0       | 0      | 0      |
| Methanocorpusculum   | 1              | 7              | 0        | 0        | 0        | 0        | 0       | 0       | 0       | 0       | 0        | 0        | 0       | 0       | 0       | 0        | 0        | 0       | 0      | 0      |
| Methanoculleus       | 1              | 8              | 0        | 0        | 0        | 0        | 0       | 0       | 0       | 0       | 0        | 0        | 0       | 0       | 0       | 0        | 0        | 0       | 0      | 0      |
| Methanohalobium      | 1              | 5              | 0        | 0        | 0        | 0        | 0       | 0       | 0       | 0       | 0        | 0        | 0       | 0       | 0       | 0        | 0        | 0       | 0      | 0      |
| Methanohalophilus    | 1              | 5              | 0        | 0        | 0        | 0        | 0       | 0       | 0       | 0       | 0        | 0        | 0       | 0       | 0       | 0        | 0        | 0       | 0      | 0      |
| Methanolobus         | 1              | 5              | 0        | 0        | 0        | 0        | 0       | 0       | 0       | 0       | 0        | 0        | 0       | 0       | 0       | 0        | 0        | 0       | 0      | 0      |
| Methanomethylovorans | 1              | 5              | 0        | 0        | 0        | 0        | 0       | 0       | 0       | 0       | 0        | 0        | 0       | 0       | 0       | 0        | 0        | 0       | 0      | 0      |
| Methanoplanus        | 1              | 7              | 0        | 0        | 0        | 0        | 0       | 0       | 0       | 0       | 0        | 0        | 0       | 0       | 0       | 0        | 0        | 0       | 0      | 0      |
| Methanopyrus         | 1              | 4              | 0        | 0        | 0        | 0        | 0       | 0       | 0       | 0       | 0        | 0        | 0       | 0       | 0       | 0        | 0        | 0       | 0      | 0      |
| Methanoregula        | 1              | 8              | 0        | 0        | 0        | 0        | 0       | 0       | 0       | 0       | 0        | 0        | 0       | 0       | 0       | 0        | 0        | 0       | 0      | 0      |
| Methanosaeta         | 1              | 9              | 0        | 0        | 0        | 0        | 0       | 0       | 0       | 0       | 0        | 0        | 0       | 0       | 0       | 0        | 0        | 0       | 0      | 0      |
| Methanosalsum        | 1              | 7              | 0        | 0        | 0        | 0        | 0       | 0       | 0       | 0       | 0        | 0        | 0       | 0       | 0       | 0        | 0        | 0       | 0      | 0      |



| Genus               | Cluster Number | Protein Counts | 4.2.1.80 | 4.2.1.83 | 4.2.1.84 | 4.99.1.7 | 5.1.2.2 | 5.2.1.2 | 5.3.3.1 | 5.3.3.4 | 5.3.99.- | 5.4.99.- | 5.5.1.1 | 5.5.1.2 | 6.2.1.- | 6.2.1.25 | 6.2.1.32 | 6.3.5.2 | K00002 | K00055 |
|---------------------|----------------|----------------|----------|----------|----------|----------|---------|---------|---------|---------|----------|----------|---------|---------|---------|----------|----------|---------|--------|--------|
| Methanosarcina      | 1              | 18             | 0        | 0        | 0        | 0        | 0       | 0       | 0       | 0       | 0        | 0        | 0       | 0       | 0       | 0        | 0        | 0       | 1      | 0      |
| Methanosphaera      | 1              | 7              | 0        | 0        | 0        | 0        | 0       | 0       | 0       | 0       | 0        | 0        | 0       | 0       | 0       | 0        | 0        | 0       | 1      | 0      |
| Methanosphaerula    | 1              | 8              | 0        | 0        | 0        | 0        | 0       | 0       | 0       | 0       | 0        | 0        | 0       | 0       | 0       | 0        | 0        | 0       | 0      | 0      |
| Methanospirillum    | 1              | 6              | 0        | 0        | 0        | 0        | 0       | 0       | 0       | 0       | 0        | 0        | 0       | 0       | 0       | 0        | 0        | 0       | 0      | 0      |
| Methanothermobacter | 1              | 6              | 0        | 0        | 0        | 0        | 0       | 0       | 0       | 0       | 0        | 0        | 0       | 0       | 0       | 0        | 0        | 0       | 0      | 0      |
| Methanothermococcus | 1              | 5              | 0        | 0        | 0        | 0        | 0       | 0       | 0       | 0       | 0        | 0        | 0       | 0       | 0       | 0        | 0        | 0       | 0      | 0      |
| Methanothermus      | 1              | 5              | 0        | 0        | 0        | 0        | 0       | 0       | 0       | 0       | 0        | 0        | 0       | 0       | 0       | 0        | 0        | 0       | 0      | 0      |
| Methanotorris       | 1              | 5              | 0        | 0        | 0        | 0        | 0       | 0       | 0       | 0       | 0        | 0        | 0       | 0       | 0       | 0        | 0        | 0       | 0      | 0      |
| Methylacidiphilum   | 2              | 48             | 0        | 0        | 0        | 0        | 0       | 0       | 0       | 0       | 0        | 0        | 0       | 0       | 0       | 0        | 0        | 1       | 0      | 0      |
| Methylarcula        | 1              | 2              | 0        | 0        | 0        | 0        | 0       | 0       | 0       | 0       | 0        | 0        | 0       | 0       | 0       | 0        | 0        | 0       | 0      | 0      |
| Methylibium         | 1              | 38             | 0        | 0        | 0        | 0        | 0       | 0       | 0       | 0       | 0        | 0        | 0       | 0       | 0       | 0        | 0        | 0       | 0      | 0      |
| Methylobacillus     | 2              | 61             | 0        | 0        | 0        | 0        | 0       | 0       | 0       | 0       | 0        | 0        | 0       | 0       | 0       | 0        | 0        | 1       | 0      | 0      |
| Methylobacterium    | 3              | 236            | 0        | 1        | 1        | 0        | 1       | 1       | 0       | 1       | 1        | 0        | 1       | 1       | 0       | 0        | 0        | 1       | 0      | 0      |
| Methylocella        | 3              | 117            | 0        | 0        | 1        | 0        | 0       | 0       | 0       | 0       | 0        | 0        | 0       | 0       | 0       | 0        | 0        | 1       | 0      | 1      |
| Methylococcus       | 2              | 80             | 0        | 0        | 0        | 0        | 0       | 0       | 0       | 0       | 0        | 0        | 0       | 0       | 0       | 0        | 0        | 1       | 0      | 0      |
| Methylocystis       | 1              | 21             | 0        | 0        | 0        | 0        | 0       | 0       | 0       | 0       | 0        | 0        | 0       | 0       | 0       | 0        | 0        | 0       | 0      | 0      |
| Methyloferula       | 1              | 2              | 0        | 0        | 0        | 0        | 0       | 0       | 0       | 0       | 0        | 0        | 0       | 0       | 0       | 0        | 0        | 0       | 0      | 0      |
| Methylomicrobium    | 1              | 12             | 0        | 0        | 0        | 0        | 0       | 0       | 0       | 0       | 0        | 0        | 0       | 0       | 0       | 0        | 0        | 0       | 0      | 0      |
| Methylomonas        | 1              | 15             | 0        | 0        | 0        | 0        | 0       | 0       | 0       | 0       | 0        | 0        | 0       | 0       | 0       | 0        | 0        | 0       | 0      | 0      |
| Methylophaga        | 1              | 7              | 0        | 0        | 0        | 0        | 0       | 0       | 0       | 0       | 0        | 0        | 0       | 0       | 0       | 0        | 0        | 0       | 0      | 0      |
| Methylophilus       | 1              | 2              | 0        | 0        | 0        | 0        | 0       | 0       | 0       | 0       | 0        | 0        | 0       | 0       | 0       | 0        | 0        | 0       | 0      | 0      |
| Methylosinus        | 1              | 2              | 0        | 0        | 0        | 0        | 0       | 0       | 0       | 0       | 0        | 0        | 0       | 0       | 0       | 0        | 0        | 0       | 0      | 0      |
| Methylotenera       | 2              | 72             | 0        | 0        | 0        | 0        | 0       | 0       | 0       | 0       | 0        | 0        | 0       | 0       | 0       | 0        | 0        | 1       | 0      | 0      |
| Methyloversatilis   | 1              | 5              | 0        | 0        | 0        | 0        | 0       | 0       | 0       | 0       | 0        | 0        | 0       | 0       | 0       | 0        | 0        | 0       | 0      | 0      |
| Methylovorus        | 2              | 66             | 0        | 0        | 0        | 0        | 0       | 0       | 0       | 0       | 0        | 0        | 0       | 0       | 0       | 0        | 0        | 1       | 0      | 0      |
| Micavibrio          | 1              | 9              | 0        | 0        | 0        | 0        | 0       | 0       | 0       | 0       | 0        | 0        | 0       | 0       | 0       | 0        | 0        | 0       | 0      | 0      |
| Microbacterium      | 2              | 115            | 0        | 0        | 1        | 0        | 0       | 0       | 0       | 0       | 1        | 0        | 1       | 1       | 0       | 0        | 0        | 1       | 0      | 1      |
| Microchaete         | 1              | 23             | 0        | 0        | 0        | 0        | 0       | 0       | 0       | 0       | 0        | 0        | 0       | 0       | 0       | 0        | 0        | 1       | 0      | 0      |
| Micrococcus         | 2              | 72             | 0        | 0        | 0        | 0        | 0       | 0       | 0       | 0       | 0        | 0        | 0       | 0       | 0       | 0        | 0        | 1       | 0      | 0      |
| Microcoleus         | 1              | 17             | 0        | 0        | 0        | 0        | 0       | 0       | 0       | 0       | 0        | 0        | 0       | 0       | 0       | 0        | 0        | 0       | 0      | 0      |
| Microcystis         | 2              | 67             | 0        | 0        | 0        | 0        | 0       | 0       | 0       | 0       | 0        | 0        | 0       | 0       | 0       | 0        | 0        | 1       | 0      | 0      |
| Microlunatus        | 1              | 25             | 0        | 0        | 0        | 0        | 0       | 0       | 0       | 0       | 0        | 0        | 0       | 0       | 0       | 0        | 0        | 0       | 0      | 0      |
| Micromonospora      | 2              | 115            | 0        | 0        | 0        | 0        | 0       | 0       | 0       | 0       | 1        | 0        | 0       | 0       | 0       | 0        | 0        | 1       | 0      | 0      |
| Microvirga          | 1              | 6              | 0        | 0        | 0        | 0        | 0       | 0       | 0       | 1       | 0        | 0        | 0       | 0       | 0       | 0        | 0        | 0       | 0      | 0      |
| Mobiluncus          | 1              | 41             | 0        | 0        | 0        | 0        | 0       | 0       | 0       | 0       | 0        | 0        | 0       | 0       | 0       | 0        | 0        | 1       | 0      | 0      |
| Modestobacter       | 1              | 43             | 0        | 0        | 0        | 0        | 0       | 0       | 0       | 0       | 0        | 0        | 0       | 0       | 0       | 0        | 0        | 0       | 0      | 1      |
| Moorea              | 1              | 2              | 0        | 0        | 0        | 0        | 0       | 0       | 0       | 0       | 0        | 0        | 0       | 0       | 0       | 0        | 0        | 0       | 0      | 0      |
| Moorella            | 2              | 69             | 0        | 0        | 0        | 0        | 0       | 0       | 0       | 0       | 0        | 0        | 0       | 0       | 0       | 0        | 0        | 1       | 0      | 0      |
| Moraxella           | 2              | 66             | 0        | 0        | 0        | 0        | 0       | 1       | 0       | 0       | 0        | 0        | 0       | 0       | 0       | 0        | 0        | 1       | 0      | 0      |
| Morganella          | 1              | 29             | 0        | 0        | 0        | 0        | 0       | 0       | 0       | 0       | 0        | 0        | 0       | 0       | 0       | 0        | 0        | 1       | 0      | 0      |
| Moritella           | 1              | 2              | 0        | 0        | 0        | 0        | 0       | 0       | 0       | 0       | 0        | 0        | 0       | 0       | 0       | 0        | 0        | 1       | 0      | 0      |
| Muricauda           | 1              | 23             | 0        | 0        | 0        | 0        | 0       | 0       | 0       | 0       | 1        | 0        | 0       | 0       | 0       | 0        | 0        | 0       | 0      | 0      |
| Mycobacterium       | 3              | 306            | 1        | 0        | 1        | 0        | 1       | 0       | 1       | 1       | 0        | 0        | 1       | 1       | 1       | 0        | 0        | 1       | 0      | 1      |
| Mycoplasma          | 1              | 53             | 0        | 0        | 0        | 0        | 0       | 0       | 0       | 0       | 0        | 0        | 0       | 0       | 0       | 0        | 0        | 1       | 0      | 0      |
| Myxococcus          | 2              | 110            | 0        | 0        | 0        | 0        | 0       | 1       | 0       | 0       | 0        | 0        | 0       | 0       | 0       | 0        | 0        | 1       | 0      | 0      |
| Nakamurella         | 2              | 115            | 0        | 0        | 0        | 0        | 1       | 0       | 0       | 0       | 1        | 0        | 0       | 0       | 0       | 0        | 0        | 1       | 0      | 0      |
| napthalene          | 1              | 2              | 0        | 0        | 0        | 0        | 0       | 0       | 0       | 0       | 0        | 0        | 0       | 0       | 0       | 0        | 0        | 0       | 0      | 0      |
| Natranaerobius      | 2              | 55             | 0        | 0        | 0        | 0        | 0       | 0       | 0       | 0       | 0        | 0        | 0       | 0       | 0       | 0        | 0        | 1       | 0      | 0      |
| Natrialba           | 1              | 16             | 0        | 0        | 0        | 0        | 0       | 0       | 0       | 0       | 0        | 0        | 0       | 0       | 0       | 0        | 0        | 0       | 0      | 0      |
| Natrinema           | 1              | 16             | 0        | 0        | 0        | 0        | 0       | 0       | 0       | 0       | 0        | 0        | 0       | 0       | 0       | 0        | 0        | 0       | 0      | 0      |
| Natronobacterium    | 1              | 11             | 0        | 0        | 0        | 0        | 0       | 0       | 0       | 0       | 0        | 0        | 0       | 0       | 0       | 0        | 0        | 0       | 0      | 0      |
| Natronococcus       | 1              | 21             | 0        | 0        | 0        | 0        | 0       | 0       | 0       | 0       | 0        | 0        | 0       | 0       | 0       | 0        | 0        | 0       | 0      | 0      |

| Genus             | Cluster Number | Protein Counts | 4.2.1.80 | 4.2.1.83 | 4.2.1.84 | 4.99.1.7 | 5.1.2.2 | 5.2.1.2 | 5.3.3.1 | 5.3.3.4 | 5.3.99.- | 5.4.99.- | 5.5.1.1 | 5.5.1.2 | 6.2.1.- | 6.2.1.25 | 6.2.1.32 | 6.3.5.2 | K00002 | K00055 |
|-------------------|----------------|----------------|----------|----------|----------|----------|---------|---------|---------|---------|----------|----------|---------|---------|---------|----------|----------|---------|--------|--------|
| Natronomonas      | 1              | 20             | 0        | 0        | 0        | 0        | 0       | 0       | 0       | 0       | 0        | 0        | 0       | 0       | 0       | 0        | 0        | 0       | 0      | 0      |
| Nautilia          | 2              | 48             | 0        | 0        | 0        | 0        | 0       | 0       | 0       | 0       | 0        | 0        | 0       | 0       | 0       | 0        | 0        | 1       | 0      | 0      |
| Neisseria         | 2              | 67             | 0        | 0        | 0        | 0        | 0       | 0       | 0       | 0       | 0        | 0        | 0       | 0       | 0       | 0        | 0        | 1       | 0      | 0      |
| Neisseriaceae     | 1              | 1              | 0        | 0        | 0        | 0        | 0       | 0       | 0       | 0       | 0        | 0        | 0       | 0       | 0       | 0        | 0        | 0       | 0      | 0      |
| Neorickettsia     | 1              | 31             | 0        | 0        | 0        | 0        | 0       | 0       | 0       | 0       | 0        | 0        | 0       | 0       | 0       | 0        | 0        | 1       | 0      | 0      |
| Neptuniibacter    | 1              | 2              | 0        | 0        | 0        | 0        | 0       | 0       | 0       | 0       | 0        | 0        | 0       | 0       | 0       | 0        | 0        | 0       | 0      | 0      |
| Niastella         | 1              | 21             | 0        | 0        | 0        | 0        | 0       | 0       | 0       | 0       | 0        | 0        | 0       | 0       | 0       | 0        | 0        | 0       | 0      | 0      |
| Nitratifractor    | 2              | 54             | 0        | 0        | 0        | 0        | 0       | 0       | 0       | 0       | 0        | 0        | 0       | 0       | 0       | 0        | 0        | 1       | 0      | 0      |
| Nitratireductor   | 1              | 19             | 0        | 0        | 0        | 0        | 0       | 0       | 0       | 0       | 0        | 0        | 0       | 0       | 0       | 0        | 0        | 1       | 0      | 0      |
| Nitratiruptor     | 2              | 40             | 1        | 0        | 0        | 0        | 0       | 0       | 0       | 0       | 0        | 0        | 0       | 0       | 0       | 0        | 0        | 1       | 0      | 0      |
| Nitrobacter       | 2              | 99             | 0        | 0        | 0        | 0        | 1       | 1       | 0       | 0       | 0        | 0        | 1       | 0       | 0       | 0        | 0        | 1       | 0      | 0      |
| Nitrococcus       | 1              | 2              | 0        | 0        | 0        | 0        | 0       | 0       | 0       | 0       | 0        | 0        | 0       | 0       | 0       | 0        | 0        | 0       | 0      | 0      |
| Nitrosococcus     | 2              | 94             | 0        | 0        | 0        | 0        | 1       | 0       | 0       | 0       | 0        | 0        | 0       | 0       | 0       | 0        | 0        | 1       | 0      | 0      |
| Nitrosomonas      | 2              | 72             | 0        | 0        | 0        | 0        | 0       | 0       | 0       | 0       | 0        | 0        | 0       | 0       | 0       | 0        | 0        | 1       | 0      | 1      |
| Nitrosopumilaceae | 1              | 7              | 0        | 0        | 0        | 0        | 0       | 0       | 0       | 0       | 0        | 0        | 0       | 0       | 0       | 0        | 0        | 0       | 0      | 0      |
| Nitrosopumilus    | 1              | 11             | 0        | 0        | 0        | 0        | 0       | 0       | 0       | 0       | 0        | 0        | 0       | 0       | 0       | 0        | 0        | 0       | 0      | 0      |
| Nitrospira        | 2              | 74             | 0        | 0        | 0        | 0        | 0       | 0       | 0       | 0       | 0        | 0        | 0       | 0       | 0       | 0        | 0        | 1       | 0      | 1      |
| Nocardia          | 2              | 185            | 0        | 0        | 1        | 0        | 0       | 0       | 1       | 1       | 0        | 0        | 1       | 0       | 0       | 0        | 0        | 1       | 0      | 1      |
| Nocardioidaceae   | 1              | 2              | 0        | 0        | 0        | 0        | 0       | 0       | 0       | 0       | 0        | 0        | 0       | 0       | 0       | 0        | 0        | 0       | 0      | 0      |
| Nocardioides      | 2              | 157            | 1        | 0        | 0        | 0        | 1       | 0       | 1       | 1       | 0        | 0        | 1       | 0       | 0       | 0        | 0        | 1       | 0      | 1      |
| Nocardiopsis      | 2              | 102            | 0        | 0        | 0        | 0        | 0       | 0       | 0       | 0       | 1        | 0        | 0       | 0       | 0       | 0        | 0        | 1       | 0      | 0      |
| Nodularia         | 1              | 22             | 0        | 0        | 0        | 0        | 0       | 0       | 0       | 0       | 0        | 0        | 0       | 0       | 0       | 0        | 0        | 1       | 0      | 0      |
| Nonlabens         | 1              | 19             | 0        | 0        | 0        | 0        | 0       | 0       | 0       | 0       | 0        | 0        | 0       | 0       | 0       | 0        | 0        | 0       | 0      | 0      |
| Nostoc            | 2              | 111            | 0        | 0        | 0        | 0        | 0       | 1       | 0       | 0       | 0        | 0        | 1       | 0       | 0       | 0        | 0        | 1       | 0      | 0      |
| Nostocaceae       | 1              | 2              | 0        | 0        | 0        | 0        | 0       | 0       | 0       | 0       | 0        | 0        | 0       | 0       | 0       | 0        | 0        | 0       | 0      | 0      |
| Novosphingobium   | 2              | 169            | 0        | 1        | 0        | 0        | 0       | 1       | 0       | 1       | 1        | 0        | 1       | 0       | 0       | 0        | 0        | 1       | 0      | 1      |
| Oceanibaculum     | 1              | 3              | 0        | 0        | 0        | 0        | 0       | 0       | 0       | 1       | 0        | 0        | 0       | 0       | 0       | 0        | 0        | 0       | 0      | 0      |
| Oceanibulbus      | 1              | 12             | 0        | 0        | 0        | 0        | 0       | 0       | 0       | 0       | 0        | 0        | 0       | 0       | 0       | 0        | 0        | 0       | 0      | 0      |
| Oceanicola        | 1              | 9              | 0        | 0        | 0        | 0        | 0       | 0       | 0       | 0       | 0        | 0        | 0       | 0       | 0       | 0        | 0        | 0       | 0      | 0      |
| Oceanimonas       | 1              | 33             | 0        | 0        | 0        | 0        | 0       | 0       | 0       | 0       | 0        | 0        | 0       | 0       | 0       | 0        | 0        | 0       | 0      | 0      |
| Oceaniovalibus    | 1              | 2              | 0        | 0        | 0        | 0        | 0       | 0       | 0       | 0       | 0        | 0        | 0       | 0       | 0       | 0        | 0        | 0       | 0      | 0      |
| Oceanithermus     | 2              | 72             | 0        | 0        | 0        | 0        | 0       | 0       | 0       | 0       | 0        | 0        | 1       | 0       | 0       | 0        | 0        | 1       | 0      | 0      |
| Oceanobacillus    | 2              | 91             | 0        | 0        | 0        | 0        | 0       | 0       | 0       | 0       | 1        | 0        | 1       | 0       | 0       | 0        | 0        | 1       | 0      | 0      |
| Oceanospirillum   | 1              | 2              | 0        | 0        | 0        | 0        | 0       | 0       | 0       | 0       | 0        | 0        | 0       | 0       | 0       | 0        | 0        | 0       | 0      | 0      |
| Ochrobactrum      | 2              | 133            | 0        | 0        | 0        | 0        | 0       | 0       | 0       | 0       | 1        | 0        | 1       | 1       | 0       | 0        | 0        | 1       | 0      | 0      |
| Octadecabacter    | 1              | 29             | 0        | 0        | 0        | 0        | 0       | 0       | 0       | 0       | 0        | 0        | 0       | 0       | 0       | 0        | 0        | 0       | 0      | 0      |
| Oenococcus        | 2              | 41             | 0        | 0        | 0        | 0        | 0       | 0       | 0       | 0       | 0        | 0        | 0       | 0       | 0       | 0        | 0        | 1       | 0      | 0      |
| Oleomonas         | 1              | 2              | 0        | 0        | 0        | 0        | 0       | 0       | 0       | 0       | 0        | 0        | 0       | 0       | 0       | 0        | 0        | 0       | 0      | 0      |
| Oligotropha       | 3              | 87             | 0        | 0        | 0        | 0        | 0       | 0       | 0       | 1       | 0        | 0        | 0       | 0       | 0       | 0        | 0        | 1       | 0      | 0      |
| Olsenella         | 2              | 40             | 0        | 0        | 0        | 0        | 0       | 0       | 0       | 0       | 0        | 0        | 0       | 0       | 0       | 0        | 0        | 1       | 0      | 0      |
| Opitutus          | 2              | 67             | 0        | 0        | 0        | 0        | 0       | 0       | 0       | 0       | 1        | 0        | 0       | 0       | 0       | 0        | 0        | 1       | 0      | 0      |
| Orientia          | 1              | 21             | 0        | 0        | 0        | 0        | 0       | 0       | 0       | 0       | 0        | 0        | 0       | 0       | 0       | 0        | 0        | 0       | 0      | 0      |
| Ornithobacterium  | 1              | 11             | 0        | 0        | 0        | 0        | 0       | 0       | 0       | 0       | 0        | 0        | 0       | 0       | 0       | 0        | 0        | 0       | 0      | 0      |
| Oscillatoria      | 1              | 16             | 0        | 0        | 0        | 0        | 0       | 0       | 0       | 0       | 0        | 0        | 0       | 0       | 0       | 0        | 0        | 0       | 0      | 0      |
| Oscillatoriales   | 1              | 2              | 0        | 0        | 0        | 0        | 0       | 0       | 0       | 0       | 0        | 0        | 0       | 0       | 0       | 0        | 0        | 0       | 0      | 0      |
| Oscillibacter     | 1              | 20             | 0        | 0        | 0        | 0        | 0       | 0       | 0       | 0       | 0        | 0        | 0       | 0       | 0       | 0        | 0        | 0       | 0      | 0      |
| Owenweeksia       | 1              | 15             | 0        | 0        | 0        | 0        | 0       | 0       | 0       | 0       | 0        | 0        | 0       | 0       | 0       | 0        | 0        | 0       | 0      | 0      |
| Oxalobacteraceae  | 1              | 4              | 0        | 0        | 0        | 0        | 0       | 0       | 0       | 0       | 0        | 0        | 0       | 0       | 0       | 0        | 0        | 0       | 0      | 0      |
| Paenibacillus     | 2              | 152            | 0        | 0        | 1        | 0        | 0       | 0       | 0       | 0       | 1        | 0        | 0       | 0       | 0       | 0        | 0        | 1       | 0      | 1      |
| Paludibacter      | 2              | 67             | 0        | 0        | 0        | 0        | 0       | 0       | 0       | 0       | 0        | 0        | 0       | 0       | 0       | 0        | 0        | 1       | 1      | 0      |
| Pandoraea         | 1              | 18             | 0        | 0        | 0        | 0        | 0       | 0       | 0       | 0       | 0        | 0        | 1       | 0       | 0       | 0        | 0        | 0       | 0      | 0      |
| Pannonibacter     | 1              | 3              | 0        | 0        | 0        | 0        | 0       | 0       | 0       | 0       | 0        | 0        | 0       | 0       | 0       | 0        | 0        | 0       | 0      | 0      |

| Genus              | Cluster Number | Protein Counts | 4.2.1.80 | 4.2.1.83 | 4.2.1.84 | 4.99.1.7 | 5.1.2.2 | 5.2.1.2 | 5.3.3.1 | 5.3.3.4 | 5.3.99.- | 5.4.99.- | 5.5.1.1 | 5.5.1.2 | 6.2.1.- | 6.2.1.25 | 6.2.1.32 | 6.3.5.2 | K00002 | K00055 |
|--------------------|----------------|----------------|----------|----------|----------|----------|---------|---------|---------|---------|----------|----------|---------|---------|---------|----------|----------|---------|--------|--------|
| Pantholops         | 1              | 23             | 0        | 1        | 0        | 0        | 0       | 0       | 0       | 0       | 0        | 0        | 0       | 0       | 0       | 0        | 0        | 0       | 0      | 0      |
| Pantoea            | 2              | 181            | 0        | 0        | 1        | 0        | 1       | 0       | 0       | 0       | 1        | 0        | 1       | 1       | 0       | 0        | 0        | 1       | 0      | 0      |
| Parabacteroides    | 2              | 64             | 0        | 0        | 0        | 0        | 0       | 0       | 0       | 0       | 1        | 0        | 0       | 0       | 0       | 0        | 0        | 1       | 0      | 0      |
| Parachlamydia      | 1              | 11             | 0        | 0        | 0        | 0        | 0       | 0       | 0       | 0       | 0        | 0        | 0       | 0       | 0       | 0        | 0        | 0       | 0      | 0      |
| Paracoccus         | 2              | 169            | 1        | 1        | 0        | 0        | 0       | 1       | 0       | 1       | 1        | 0        | 1       | 1       | 0       | 1        | 0        | 1       | 0      | 0      |
| Parvibaculum       | 3              | 117            | 0        | 0        | 0        | 0        | 0       | 1       | 0       | 0       | 0        | 0        | 1       | 0       | 0       | 0        | 0        | 1       | 0      | 1      |
| Parvularcula       | 2              | 72             | 0        | 0        | 0        | 0        | 0       | 0       | 0       | 0       | 0        | 0        | 0       | 0       | 0       | 0        | 0        | 1       | 0      | 0      |
| Pasteurella        | 2              | 85             | 0        | 0        | 0        | 0        | 0       | 0       | 0       | 0       | 0        | 0        | 0       | 0       | 0       | 0        | 0        | 1       | 0      | 0      |
| Pasteurellaceae    | 1              | 2              | 0        | 0        | 0        | 0        | 0       | 0       | 0       | 0       | 0        | 0        | 0       | 0       | 0       | 0        | 0        | 0       | 0      | 0      |
| Pectobacterium     | 1              | 44             | 0        | 0        | 0        | 0        | 0       | 0       | 0       | 0       | 0        | 0        | 0       | 0       | 0       | 0        | 0        | 1       | 0      | 0      |
| Pediococcus        | 1              | 43             | 0        | 0        | 0        | 0        | 0       | 0       | 0       | 0       | 0        | 0        | 0       | 0       | 0       | 0        | 0        | 1       | 0      | 1      |
| Pedobacter         | 2              | 88             | 0        | 0        | 0        | 0        | 0       | 0       | 0       | 0       | 1        | 0        | 1       | 0       | 0       | 0        | 0        | 1       | 0      | 0      |
| Pelagibaca         | 1              | 10             | 0        | 0        | 0        | 0        | 0       | 0       | 0       | 0       | 0        | 0        | 0       | 0       | 0       | 0        | 0        | 0       | 0      | 0      |
| Pelagibacterium    | 1              | 39             | 0        | 0        | 0        | 0        | 0       | 0       | 0       | 0       | 0        | 0        | 0       | 0       | 0       | 0        | 0        | 0       | 0      | 0      |
| Pelobacter         | 2              | 85             | 0        | 0        | 0        | 0        | 0       | 0       | 0       | 0       | 0        | 0        | 0       | 0       | 0       | 0        | 0        | 1       | 0      | 0      |
| Pelodictyon        | 2              | 62             | 0        | 0        | 0        | 0        | 0       | 0       | 0       | 0       | 0        | 0        | 0       | 0       | 0       | 0        | 0        | 1       | 0      | 0      |
| Pelosinus          | 1              | 1              | 0        | 0        | 0        | 0        | 0       | 0       | 0       | 0       | 0        | 0        | 0       | 0       | 0       | 0        | 0        | 0       | 0      | 0      |
| Pelotomaculum      | 2              | 60             | 1        | 0        | 0        | 0        | 0       | 0       | 0       | 0       | 0        | 0        | 0       | 0       | 0       | 0        | 0        | 1       | 0      | 0      |
| Peptostreptococcus | 1              | 1              | 0        | 0        | 0        | 0        | 0       | 0       | 0       | 0       | 0        | 0        | 0       | 0       | 0       | 0        | 0        | 0       | 0      | 0      |
| Persephonella      | 2              | 55             | 0        | 0        | 0        | 0        | 0       | 0       | 0       | 0       | 0        | 0        | 0       | 0       | 0       | 0        | 0        | 1       | 0      | 0      |
| Petrogoga          | 2              | 72             | 0        | 0        | 0        | 0        | 0       | 0       | 0       | 0       | 0        | 0        | 1       | 0       | 0       | 0        | 0        | 1       | 0      | 0      |
| Phaeobacter        | 2              | 55             | 0        | 0        | 0        | 0        | 0       | 0       | 0       | 0       | 0        | 0        | 1       | 0       | 0       | 0        | 0        | 1       | 0      | 0      |
| Phenylobacterium   | 3              | 103            | 0        | 0        | 0        | 0        | 0       | 0       | 0       | 0       | 1        | 0        | 1       | 0       | 0       | 0        | 0        | 1       | 0      | 0      |
| Photobacterium     | 2              | 119            | 1        | 0        | 0        | 0        | 0       | 0       | 0       | 0       | 1        | 0        | 0       | 0       | 0       | 0        | 0        | 1       | 0      | 0      |
| Photorhabdus       | 2              | 149            | 0        | 0        | 0        | 0        | 0       | 0       | 0       | 0       | 0        | 1        | 0       | 0       | 0       | 0        | 0        | 1       | 0      | 0      |
| Phycisphaera       | 1              | 9              | 0        | 0        | 0        | 0        | 0       | 0       | 0       | 0       | 0        | 0        | 0       | 0       | 0       | 0        | 0        | 0       | 0      | 0      |
| Phyllobacterium    | 1              | 6              | 0        | 0        | 0        | 0        | 0       | 0       | 0       | 0       | 0        | 0        | 0       | 0       | 0       | 0        | 0        | 0       | 0      | 0      |
| Picrophilus        | 1              | 15             | 0        | 0        | 0        | 0        | 0       | 0       | 0       | 0       | 0        | 0        | 0       | 0       | 0       | 0        | 0        | 0       | 0      | 0      |
| Pirellula          | 2              | 85             | 0        | 0        | 0        | 0        | 0       | 0       | 0       | 0       | 1        | 0        | 1       | 0       | 0       | 0        | 0        | 1       | 0      | 0      |
| Planctomyces       | 2              | 93             | 0        | 0        | 0        | 0        | 0       | 0       | 0       | 0       | 1        | 0        | 1       | 0       | 0       | 0        | 0        | 1       | 0      | 0      |
| Plautia            | 1              | 17             | 0        | 0        | 0        | 0        | 0       | 0       | 0       | 0       | 0        | 0        | 0       | 0       | 0       | 0        | 0        | 1       | 0      | 0      |
| Plesiomonas        | 1              | 4              | 0        | 0        | 0        | 0        | 0       | 0       | 0       | 0       | 0        | 0        | 0       | 0       | 0       | 0        | 0        | 0       | 0      | 0      |
| Pleurocapsa        | 1              | 23             | 0        | 0        | 0        | 0        | 0       | 0       | 0       | 0       | 0        | 0        | 0       | 0       | 0       | 0        | 0        | 0       | 0      | 0      |
| Polaribacter       | 2              | 74             | 0        | 0        | 0        | 0        | 0       | 0       | 0       | 0       | 1        | 0        | 0       | 0       | 0       | 0        | 0        | 1       | 0      | 0      |
| Polaromonas        | 3              | 238            | 0        | 1        | 0        | 0        | 1       | 1       | 0       | 1       | 0        | 0        | 1       | 1       | 1       | 1        | 0        | 1       | 0      | 0      |
| Polymorphum        | 3              | 173            | 0        | 0        | 1        | 0        | 0       | 1       | 0       | 0       | 0        | 0        | 1       | 1       | 0       | 0        | 0        | 1       | 0      | 0      |
| Polynucleobacter   | 1              | 19             | 0        | 0        | 0        | 0        | 0       | 0       | 0       | 0       | 0        | 0        | 0       | 0       | 0       | 0        | 0        | 0       | 0      | 0      |
| Ponticaulis        | 1              | 1              | 0        | 0        | 0        | 0        | 0       | 0       | 0       | 0       | 0        | 0        | 0       | 0       | 0       | 0        | 0        | 0       | 0      | 0      |
| Porphyromonas      | 2              | 63             | 0        | 0        | 0        | 0        | 0       | 0       | 0       | 0       | 0        | 0        | 0       | 0       | 0       | 0        | 0        | 1       | 0      | 0      |
| Prevotella         | 1              | 65             | 0        | 0        | 0        | 0        | 0       | 0       | 0       | 0       | 0        | 0        | 0       | 0       | 0       | 0        | 0        | 1       | 0      | 0      |
| Prochlorococcus    | 2              | 68             | 0        | 0        | 0        | 0        | 0       | 1       | 0       | 0       | 0        | 0        | 0       | 0       | 0       | 0        | 0        | 1       | 0      | 0      |
| Propionibacterium  | 1              | 62             | 0        | 0        | 0        | 0        | 0       | 0       | 0       | 0       | 1        | 0        | 0       | 0       | 0       | 0        | 0        | 1       | 1      | 0      |
| Prosthecochloris   | 1              | 16             | 0        | 0        | 0        | 0        | 0       | 0       | 0       | 0       | 0        | 0        | 0       | 0       | 0       | 0        | 0        | 0       | 0      | 0      |
| Proteobacteria     | 1              | 19             | 0        | 0        | 0        | 0        | 0       | 0       | 0       | 0       | 0        | 0        | 1       | 0       | 0       | 0        | 0        | 0       | 0      | 0      |
| Proteus            | 2              | 113            | 0        | 0        | 0        | 0        | 0       | 0       | 0       | 0       | 0        | 0        | 0       | 0       | 0       | 0        | 0        | 1       | 0      | 0      |
| Providencia        | 1              | 38             | 0        | 0        | 0        | 0        | 0       | 0       | 0       | 0       | 0        | 0        | 0       | 0       | 0       | 0        | 0        | 0       | 0      | 0      |
| Pseudaminobacter   | 1              | 10             | 0        | 0        | 0        | 0        | 0       | 0       | 0       | 0       | 0        | 0        | 0       | 0       | 0       | 0        | 0        | 0       | 0      | 0      |
| Pseudanabaena      | 1              | 11             | 0        | 0        | 0        | 0        | 0       | 0       | 0       | 0       | 0        | 0        | 0       | 0       | 0       | 0        | 0        | 0       | 0      | 0      |
| Pseudoalteromonas  | 2              | 188            | 1        | 1        | 0        | 0        | 0       | 1       | 0       | 0       | 1        | 0        | 0       | 0       | 1       | 0        | 0        | 1       | 0      | 1      |
| Pseudochrobactrum  | 1              | 7              | 0        | 0        | 0        | 0        | 0       | 0       | 0       | 0       | 0        | 0        | 0       | 0       | 0       | 0        | 0        | 0       | 0      | 0      |
| Pseudogulbenkiania | 1              | 40             | 0        | 0        | 0        | 0        | 0       | 0       | 0       | 0       | 0        | 0        | 0       | 0       | 0       | 0        | 0        | 0       | 0      | 0      |
| pseudomallei       | 3              | 131            | 0        | 0        | 0        | 0        | 0       | 0       | 0       | 1       | 0        | 0        | 0       | 1       | 1       | 0        | 0        | 1       | 0      | 0      |

| Genus                   | Cluster Number | Protein Counts | 4.2.1.80 | 4.2.1.83 | 4.2.1.84 | 4.99.1.7 | 5.1.2.2 | 5.2.1.2 | 5.3.3.1 | 5.3.3.4 | 5.3.99.- | 5.4.99.- | 5.5.1.1 | 5.5.1.2 | 6.2.1.- | 6.2.1.25 | 6.2.1.32 | 6.3.5.2 | K00002 | K00055 |
|-------------------------|----------------|----------------|----------|----------|----------|----------|---------|---------|---------|---------|----------|----------|---------|---------|---------|----------|----------|---------|--------|--------|
| Pseudomonas             | 3              | 381            | 1        | 0        | 1        | 0        | 1       | 1       | 0       | 1       | 1        | 1        | 1       | 1       | 1       | 0        | 1        | 1       | 1      | 1      |
| Pseudonocardia          | 3              | 180            | 0        | 0        | 1        | 0        | 1       | 0       | 0       | 1       | 0        | 0        | 1       | 1       | 0       | 0        | 0        | 1       | 0      | 0      |
| Pseudorhodobacter       | 1              | 4              | 0        | 0        | 0        | 0        | 0       | 0       | 0       | 0       | 0        | 0        | 0       | 0       | 0       | 0        | 0        | 0       | 0      | 0      |
| Pseudovibrio            | 1              | 33             | 0        | 0        | 0        | 0        | 0       | 0       | 0       | 0       | 0        | 0        | 0       | 0       | 0       | 0        | 0        | 0       | 0      | 0      |
| Pseudoxanthomonas       | 2              | 124            | 0        | 0        | 0        | 0        | 0       | 1       | 0       | 0       | 0        | 0        | 0       | 0       | 0       | 0        | 0        | 1       | 0      | 1      |
| Psychrobacter           | 2              | 124            | 0        | 0        | 0        | 0        | 0       | 0       | 0       | 1       | 0        | 0        | 1       | 0       | 1       | 0        | 0        | 1       | 0      | 0      |
| Psychroflexus           | 1              | 22             | 0        | 0        | 0        | 0        | 0       | 0       | 0       | 0       | 0        | 0        | 0       | 0       | 0       | 0        | 0        | 0       | 0      | 0      |
| Psychromonas            | 2              | 110            | 1        | 0        | 0        | 0        | 0       | 0       | 0       | 0       | 0        | 0        | 0       | 0       | 0       | 0        | 0        | 1       | 0      | 0      |
| Pusillimonas            | 3              | 111            | 0        | 0        | 0        | 0        | 0       | 1       | 0       | 0       | 0        | 0        | 1       | 1       | 0       | 0        | 0        | 1       | 0      | 0      |
| Pyrobaculum             | 1              | 15             | 0        | 0        | 0        | 0        | 0       | 0       | 0       | 0       | 0        | 0        | 0       | 0       | 0       | 0        | 0        | 0       | 0      | 0      |
| Pyrococcus              | 1              | 10             | 0        | 0        | 0        | 0        | 0       | 0       | 0       | 0       | 0        | 0        | 0       | 0       | 0       | 0        | 0        | 0       | 0      | 0      |
| Pyrolobus               | 1              | 4              | 0        | 0        | 0        | 0        | 0       | 0       | 0       | 0       | 0        | 0        | 0       | 0       | 0       | 0        | 0        | 0       | 0      | 0      |
| Rahnella                | 2              | 143            | 0        | 0        | 1        | 0        | 0       | 0       | 0       | 0       | 0        | 0        | 1       | 0       | 0       | 0        | 0        | 1       | 0      | 1      |
| Ralstonia               | 3              | 332            | 1        | 1        | 0        | 0        | 1       | 1       | 0       | 1       | 1        | 0        | 1       | 1       | 1       | 1        | 0        | 1       | 1      | 0      |
| Ramlibacter             | 1              | 35             | 0        | 0        | 0        | 0        | 0       | 0       | 0       | 0       | 0        | 0        | 0       | 0       | 0       | 0        | 0        | 0       | 0      | 0      |
| Raoultella              | 2              | 139            | 0        | 0        | 0        | 0        | 0       | 0       | 0       | 0       | 0        | 0        | 1       | 0       | 0       | 0        | 0        | 1       | 0      | 0      |
| Raphidiopsis            | 1              | 5              | 0        | 0        | 0        | 0        | 0       | 0       | 0       | 0       | 0        | 0        | 0       | 0       | 0       | 0        | 0        | 0       | 0      | 0      |
| Reinekea                | 1              | 2              | 0        | 0        | 0        | 0        | 0       | 0       | 0       | 0       | 0        | 0        | 0       | 0       | 0       | 0        | 0        | 0       | 0      | 0      |
| Renibacterium           | 2              | 67             | 0        | 0        | 0        | 0        | 0       | 0       | 0       | 0       | 1        | 0        | 0       | 0       | 0       | 0        | 0        | 1       | 0      | 0      |
| Rhizobiaceae            | 1              | 3              | 0        | 0        | 0        | 0        | 0       | 0       | 0       | 0       | 0        | 0        | 0       | 0       | 0       | 0        | 0        | 0       | 0      | 0      |
| Rhizobiales             | 1              | 6              | 0        | 0        | 0        | 0        | 0       | 0       | 0       | 0       | 0        | 0        | 0       | 0       | 0       | 0        | 0        | 0       | 0      | 0      |
| Rhizobium               | 3              | 257            | 1        | 1        | 1        | 0        | 0       | 1       | 0       | 1       | 1        | 0        | 1       | 1       | 0       | 1        | 0        | 1       | 0      | 1      |
| Rhizobium/Agrobacterium | 2              | 87             | 0        | 0        | 0        | 0        | 0       | 1       | 0       | 0       | 1        | 0        | 0       | 0       | 0       | 1        | 0        | 1       | 0      | 0      |
| Rhodanobacter           | 1              | 21             | 0        | 0        | 0        | 0        | 0       | 0       | 0       | 0       | 0        | 0        | 0       | 0       | 0       | 0        | 0        | 0       | 0      | 0      |
| Rhodobacter             | 3              | 175            | 0        | 0        | 0        | 0        | 0       | 0       | 0       | 1       | 1        | 0        | 0       | 0       | 1       | 0        | 0        | 1       | 0      | 0      |
| Rhodobacteraceae        | 1              | 21             | 0        | 0        | 0        | 0        | 0       | 0       | 0       | 0       | 0        | 0        | 0       | 0       | 0       | 0        | 0        | 0       | 0      | 0      |
| Rhodobacterales         | 1              | 34             | 0        | 0        | 0        | 0        | 0       | 0       | 0       | 0       | 0        | 0        | 0       | 0       | 0       | 0        | 0        | 0       | 0      | 0      |
| Rhodococcus             | 2              | 292            | 1        | 1        | 1        | 0        | 1       | 0       | 1       | 1       | 1        | 1        | 1       | 1       | 1       | 0        | 0        | 1       | 0      | 1      |
| Rhodocyclaceae          | 1              | 7              | 0        | 0        | 0        | 0        | 0       | 0       | 0       | 0       | 0        | 0        | 0       | 0       | 0       | 0        | 0        | 0       | 0      | 0      |
| Rhodoferax              | 3              | 144            | 0        | 1        | 0        | 0        | 0       | 0       | 0       | 0       | 0        | 0        | 0       | 1       | 0       | 1        | 0        | 1       | 0      | 0      |
| Rhodomicrobium          | 2              | 103            | 0        | 0        | 1        | 0        | 0       | 0       | 0       | 0       | 0        | 0        | 1       | 0       | 0       | 1        | 0        | 1       | 0      | 0      |
| Rhodopirellula          | 2              | 87             | 0        | 0        | 0        | 0        | 0       | 0       | 0       | 0       | 1        | 0        | 1       | 0       | 0       | 0        | 0        | 1       | 0      | 0      |
| Rhodopseudomonas        | 3              | 246            | 0        | 1        | 1        | 0        | 0       | 1       | 0       | 0       | 0        | 0        | 1       | 1       | 0       | 1        | 0        | 1       | 0      | 0      |
| Rhodospirillum          | 2              | 121            | 0        | 0        | 0        | 0        | 0       | 0       | 0       | 0       | 0        | 0        | 0       | 0       | 0       | 0        | 0        | 1       | 0      | 0      |
| Rhodothermus            | 2              | 76             | 0        | 0        | 0        | 0        | 0       | 0       | 0       | 0       | 1        | 0        | 0       | 0       | 0       | 0        | 0        | 1       | 0      | 0      |
| Rhodovulum              | 1              | 4              | 0        | 0        | 0        | 0        | 0       | 0       | 0       | 0       | 0        | 0        | 0       | 0       | 0       | 0        | 0        | 0       | 0      | 0      |
| Richelia                | 1              | 2              | 0        | 0        | 0        | 0        | 0       | 0       | 0       | 0       | 0        | 0        | 0       | 0       | 0       | 0        | 0        | 0       | 0      | 0      |
| Rickettsia              | 2              | 43             | 0        | 0        | 0        | 0        | 0       | 0       | 0       | 0       | 0        | 0        | 0       | 0       | 0       | 0        | 0        | 0       | 0      | 0      |
| Rickettsiaceae          | 1              | 5              | 0        | 0        | 0        | 0        | 0       | 0       | 0       | 0       | 0        | 0        | 0       | 0       | 0       | 0        | 0        | 0       | 0      | 0      |
| Riemerella              | 2              | 61             | 0        | 0        | 0        | 0        | 0       | 0       | 0       | 0       | 0        | 0        | 0       | 0       | 0       | 0        | 0        | 1       | 0      | 0      |
| Rivularia               | 1              | 18             | 0        | 0        | 0        | 0        | 0       | 0       | 0       | 0       | 0        | 0        | 0       | 0       | 0       | 0        | 0        | 0       | 0      | 0      |
| Robiginitalea           | 2              | 83             | 0        | 0        | 0        | 0        | 0       | 0       | 0       | 0       | 1        | 0        | 0       | 0       | 0       | 0        | 0        | 1       | 0      | 0      |
| Roseburia               | 2              | 58             | 0        | 0        | 0        | 0        | 0       | 0       | 0       | 0       | 0        | 0        | 0       | 0       | 0       | 0        | 0        | 1       | 0      | 0      |
| Roseibium               | 1              | 3              | 0        | 0        | 0        | 0        | 0       | 0       | 0       | 0       | 0        | 0        | 0       | 0       | 0       | 0        | 0        | 0       | 0      | 0      |
| Roseiflexus             | 3              | 100            | 0        | 0        | 0        | 0        | 0       | 0       | 0       | 0       | 1        | 0        | 0       | 0       | 0       | 0        | 0        | 1       | 0      | 0      |
| Roseobacter             | 2              | 149            | 0        | 0        | 1        | 0        | 0       | 0       | 0       | 1       | 1        | 0        | 0       | 1       | 0       | 0        | 0        | 1       | 0      | 0      |
| Roseomonas              | 1              | 2              | 0        | 0        | 0        | 0        | 0       | 0       | 0       | 0       | 0        | 0        | 0       | 0       | 0       | 0        | 0        | 0       | 0      | 0      |
| Roseovarius             | 1              | 15             | 0        | 0        | 0        | 0        | 0       | 0       | 0       | 0       | 0        | 0        | 0       | 0       | 0       | 0        | 0        | 0       | 0      | 0      |
| Rothia                  | 1              | 44             | 0        | 0        | 0        | 0        | 0       | 0       | 0       | 0       | 0        | 0        | 0       | 0       | 0       | 0        | 0        | 1       | 0      | 0      |
| Rubrivivax              | 1              | 24             | 0        | 0        | 0        | 0        | 0       | 0       | 0       | 0       | 0        | 0        | 0       | 0       | 0       | 0        | 0        | 0       | 0      | 0      |
| Rubroacter              | 3              | 117            | 0        | 0        | 1        | 0        | 0       | 0       | 0       | 0       | 1        | 0        | 0       | 1       | 0       | 1        | 0        | 1       | 0      | 1      |
| Ruegeria                | 2              | 189            | 1        | 0        | 1        | 0        | 1       | 1       | 0       | 1       | 0        | 0        | 1       | 1       | 0       | 1        | 0        | 1       | 0      | 0      |

| Genus             | Cluster Number | Protein Counts | 4.2.1.80 | 4.2.1.83 | 4.2.1.84 | 4.99.1.7 | 5.1.2.2 | 5.2.1.2 | 5.3.3.1 | 5.3.3.4 | 5.3.99.- | 5.4.99.- | 5.5.1.1 | 5.5.1.2 | 6.2.1.- | 6.2.1.25 | 6.2.1.32 | 6.3.5.2 | K00002 | K00055 |
|-------------------|----------------|----------------|----------|----------|----------|----------|---------|---------|---------|---------|----------|----------|---------|---------|---------|----------|----------|---------|--------|--------|
| Ruminococcaceae   | 1              | 2              | 0        | 0        | 0        | 0        | 0       | 0       | 0       | 0       | 0        | 0        | 0       | 0       | 0       | 0        | 0        | 0       | 0      | 0      |
| Ruminococcus      | 2              | 101            | 0        | 0        | 0        | 0        | 0       | 0       | 0       | 0       | 1        | 0        | 0       | 0       | 0       | 0        | 0        | 1       | 0      | 0      |
| Runella           | 1              | 26             | 0        | 0        | 0        | 0        | 0       | 0       | 0       | 0       | 0        | 0        | 0       | 0       | 0       | 0        | 0        | 0       | 0      | 0      |
| Saccharomonospora | 2              | 132            | 0        | 0        | 0        | 0        | 0       | 0       | 0       | 1       | 1        | 0        | 0       | 1       | 0       | 0        | 0        | 1       | 0      | 1      |
| Saccharophagus    | 2              | 81             | 0        | 0        | 0        | 0        | 0       | 1       | 0       | 0       | 1        | 0        | 0       | 0       | 0       | 0        | 0        | 1       | 0      | 0      |
| Saccharopolyspora | 3              | 194            | 0        | 0        | 0        | 0        | 0       | 0       | 1       | 1       | 1        | 0        | 1       | 1       | 0       | 0        | 0        | 1       | 1      | 0      |
| Saccharothrix     | 1              | 32             | 0        | 0        | 0        | 0        | 0       | 0       | 0       | 0       | 0        | 0        | 0       | 0       | 0       | 0        | 0        | 0       | 0      | 0      |
| Sagittula         | 1              | 10             | 0        | 0        | 0        | 0        | 0       | 0       | 0       | 0       | 0        | 0        | 0       | 0       | 0       | 0        | 0        | 0       | 0      | 0      |
| Salinibacter      | 2              | 77             | 0        | 0        | 0        | 0        | 0       | 0       | 0       | 0       | 1        | 0        | 0       | 0       | 0       | 0        | 0        | 1       | 1      | 0      |
| Salinimonas       | 1              | 1              | 0        | 0        | 0        | 0        | 0       | 0       | 0       | 0       | 0        | 0        | 0       | 0       | 0       | 0        | 0        | 0       | 0      | 0      |
| Salinispora       | 3              | 127            | 1        | 0        | 0        | 0        | 0       | 0       | 0       | 0       | 0        | 0        | 0       | 1       | 0       | 0        | 0        | 1       | 0      | 0      |
| Salinivibrio      | 1              | 2              | 0        | 0        | 0        | 0        | 0       | 0       | 0       | 0       | 0        | 0        | 0       | 0       | 0       | 0        | 0        | 0       | 0      | 0      |
| Salmonella        | 2              | 151            | 0        | 0        | 0        | 0        | 0       | 1       | 0       | 0       | 1        | 0        | 0       | 0       | 0       | 0        | 0        | 1       | 0      | 0      |
| Sanguibacter      | 2              | 73             | 0        | 0        | 0        | 0        | 0       | 0       | 0       | 0       | 1        | 0        | 0       | 0       | 0       | 0        | 0        | 1       | 0      | 0      |
| Saprospira        | 1              | 13             | 0        | 0        | 0        | 0        | 0       | 0       | 0       | 0       | 0        | 0        | 0       | 0       | 0       | 0        | 0        | 0       | 0      | 0      |
| Scardovia         | 1              | 1              | 0        | 0        | 0        | 0        | 0       | 0       | 0       | 0       | 0        | 0        | 0       | 0       | 0       | 0        | 0        | 0       | 0      | 0      |
| Scytonema         | 1              | 10             | 0        | 0        | 0        | 0        | 0       | 0       | 0       | 0       | 0        | 0        | 0       | 0       | 0       | 0        | 0        | 0       | 0      | 0      |
| Sebaldella        | 2              | 69             | 0        | 0        | 0        | 0        | 0       | 0       | 0       | 0       | 1        | 0        | 0       | 0       | 0       | 0        | 0        | 1       | 0      | 0      |
| Segniliparus      | 2              | 85             | 0        | 0        | 0        | 0        | 0       | 0       | 0       | 0       | 0        | 0        | 0       | 0       | 0       | 0        | 0        | 1       | 0      | 0      |
| Selenomonas       | 2              | 57             | 0        | 0        | 0        | 0        | 0       | 0       | 0       | 0       | 0        | 0        | 0       | 0       | 0       | 0        | 0        | 1       | 0      | 0      |
| Serinicoccus      | 1              | 1              | 0        | 0        | 0        | 0        | 0       | 0       | 0       | 0       | 0        | 0        | 0       | 0       | 0       | 0        | 0        | 0       | 0      | 0      |
| Serratia          | 2              | 186            | 0        | 0        | 1        | 0        | 0       | 0       | 0       | 0       | 1        | 0        | 0       | 1       | 0       | 0        | 0        | 1       | 0      | 1      |
| Shewanella        | 3              | 214            | 1        | 0        | 0        | 1        | 0       | 1       | 1       | 0       | 1        | 0        | 0       | 0       | 0       | 0        | 0        | 1       | 0      | 0      |
| Shigella          | 2              | 172            | 1        | 0        | 0        | 0        | 0       | 1       | 0       | 0       | 0        | 0        | 0       | 0       | 0       | 0        | 0        | 1       | 0      | 0      |
| Shinella          | 1              | 2              | 0        | 0        | 0        | 0        | 0       | 0       | 0       | 0       | 0        | 0        | 0       | 0       | 0       | 0        | 0        | 0       | 0      | 0      |
| Sideroxydans      | 2              | 81             | 0        | 0        | 0        | 0        | 0       | 0       | 0       | 0       | 0        | 0        | 0       | 0       | 0       | 0        | 0        | 1       | 0      | 0      |
| Silicibacter      | 2              | 105            | 0        | 0        | 0        | 0        | 0       | 1       | 0       | 1       | 0        | 0        | 1       | 0       | 0       | 0        | 0        | 0       | 0      | 0      |
| Simiduia          | 1              | 18             | 0        | 0        | 0        | 0        | 0       | 0       | 0       | 0       | 0        | 0        | 0       | 0       | 0       | 0        | 0        | 0       | 0      | 0      |
| Simkania          | 1              | 6              | 0        | 0        | 0        | 0        | 0       | 0       | 0       | 0       | 0        | 0        | 0       | 0       | 0       | 0        | 0        | 0       | 0      | 0      |
| Simonsiella       | 1              | 2              | 0        | 0        | 0        | 0        | 0       | 0       | 0       | 0       | 0        | 0        | 0       | 0       | 0       | 0        | 0        | 1       | 0      | 0      |
| Singulisphaera    | 1              | 18             | 0        | 0        | 0        | 0        | 0       | 0       | 0       | 0       | 0        | 0        | 0       | 0       | 0       | 0        | 0        | 0       | 0      | 0      |
| Sinorhizobium     | 3              | 207            | 0        | 1        | 1        | 0        | 0       | 1       | 0       | 0       | 1        | 0        | 1       | 1       | 0       | 0        | 0        | 1       | 0      | 1      |
| Slackia           | 2              | 46             | 0        | 0        | 0        | 0        | 0       | 0       | 0       | 0       | 0        | 0        | 0       | 0       | 0       | 0        | 0        | 1       | 0      | 0      |
| Smaragdicooccus   | 1              | 3              | 0        | 0        | 0        | 0        | 0       | 0       | 0       | 0       | 0        | 0        | 0       | 0       | 0       | 0        | 0        | 0       | 0      | 0      |
| Sodalis           | 2              | 71             | 0        | 0        | 0        | 0        | 0       | 0       | 0       | 0       | 0        | 0        | 0       | 0       | 0       | 0        | 0        | 1       | 0      | 0      |
| Solibacillus      | 1              | 23             | 0        | 0        | 0        | 0        | 0       | 0       | 0       | 0       | 0        | 0        | 0       | 0       | 0       | 0        | 0        | 0       | 0      | 1      |
| Solitaea          | 1              | 13             | 0        | 0        | 0        | 0        | 0       | 0       | 0       | 0       | 0        | 0        | 0       | 0       | 0       | 0        | 0        | 0       | 0      | 0      |
| Sorangium         | 3              | 115            | 0        | 0        | 0        | 0        | 1       | 1       | 0       | 0       | 0        | 0        | 0       | 0       | 0       | 1        | 0        | 1       | 0      | 0      |
| Sphaerobacter     | 2              | 100            | 0        | 0        | 0        | 0        | 0       | 0       | 0       | 0       | 0        | 0        | 0       | 1       | 0       | 0        | 0        | 1       | 0      | 0      |
| Sphaerochaeta     | 1              | 42             | 0        | 0        | 0        | 0        | 0       | 0       | 0       | 0       | 1        | 0        | 0       | 0       | 0       | 0        | 0        | 1       | 0      | 0      |
| Sphingobacterium  | 3              | 85             | 0        | 0        | 0        | 0        | 0       | 0       | 0       | 0       | 1        | 0        | 1       | 0       | 0       | 0        | 0        | 1       | 0      | 0      |
| Sphingobium       | 1              | 179            | 0        | 1        | 0        | 0        | 0       | 0       | 0       | 1       | 0        | 0        | 1       | 0       | 0       | 0        | 0        | 1       | 0      | 1      |
| Sphingomonadaceae | 1              | 15             | 0        | 0        | 0        | 0        | 0       | 0       | 0       | 0       | 0        | 0        | 0       | 0       | 0       | 0        | 0        | 0       | 0      | 1      |
| Sphingomonas      | 2              | 220            | 1        | 1        | 0        | 1        | 0       | 1       | 0       | 1       | 1        | 0        | 1       | 1       | 0       | 1        | 0        | 1       | 0      | 1      |
| Sphingopyxis      | 3              | 99             | 0        | 1        | 0        | 0        | 0       | 0       | 0       | 0       | 0        | 0        | 1       | 0       | 0       | 0        | 0        | 1       | 0      | 0      |
| Spirochaeta       | 2              | 103            | 0        | 0        | 0        | 0        | 0       | 0       | 0       | 0       | 1        | 0        | 1       | 0       | 0       | 0        | 0        | 1       | 0      | 0      |
| Spiroplasma       | 1              | 6              | 0        | 0        | 0        | 0        | 0       | 0       | 0       | 0       | 0        | 0        | 0       | 0       | 0       | 0        | 0        | 0       | 0      | 0      |
| Spirosoma         | 2              | 107            | 0        | 0        | 0        | 0        | 0       | 0       | 0       | 0       | 1        | 0        | 0       | 1       | 1       | 0        | 0        | 1       | 0      | 0      |
| Stackebrandtia    | 2              | 110            | 0        | 0        | 0        | 0        | 0       | 0       | 0       | 0       | 1        | 0        | 1       | 1       | 0       | 0        | 0        | 1       | 0      | 0      |
| Stanieria         | 1              | 17             | 0        | 0        | 0        | 0        | 0       | 0       | 0       | 0       | 0        | 0        | 0       | 0       | 0       | 0        | 0        | 0       | 0      | 0      |
| Staphylococcus    | 2              | 108            | 0        | 0        | 0        | 0        | 0       | 0       | 0       | 0       | 1        | 0        | 0       | 0       | 0       | 0        | 0        | 1       | 0      | 0      |
| Staphylothermus   | 1              | 12             | 0        | 0        | 0        | 0        | 0       | 0       | 0       | 0       | 0        | 0        | 0       | 0       | 0       | 0        | 0        | 0       | 0      | 0      |

| Genus                  | Cluster Number | Protein Counts | 4.2.1.80 | 4.2.1.83 | 4.2.1.84 | 4.99.1.7 | 5.1.2.2 | 5.2.1.2 | 5.3.3.1 | 5.3.3.4 | 5.3.99.- | 5.4.99.- | 5.5.1.1 | 5.5.1.2 | 6.2.1.- | 6.2.1.25 | 6.2.1.32 | 6.3.5.2 | K00002 | K00055 |
|------------------------|----------------|----------------|----------|----------|----------|----------|---------|---------|---------|---------|----------|----------|---------|---------|---------|----------|----------|---------|--------|--------|
| Stappia                | 1              | 2              | 0        | 0        | 0        | 0        | 0       | 0       | 0       | 0       | 0        | 0        | 0       | 0       | 0       | 0        | 0        | 0       | 0      | 0      |
| Starkeya               | 3              | 134            | 0        | 0        | 0        | 0        | 0       | 1       | 0       | 0       | 1        | 0        | 1       | 0       | 0       | 0        | 0        | 1       | 0      | 0      |
| Stenotrophomonas       | 3              | 104            | 0        | 0        | 0        | 0        | 0       | 0       | 0       | 0       | 1        | 0        | 0       | 0       | 1       | 0        | 0        | 1       | 0      | 1      |
| Stigmatella            | 3              | 129            | 0        | 0        | 0        | 0        | 0       | 1       | 0       | 0       | 1        | 0        | 1       | 1       | 0       | 0        | 0        | 1       | 0      | 0      |
| Streptobacillus        | 1              | 38             | 0        | 0        | 0        | 0        | 0       | 0       | 0       | 0       | 0        | 0        | 0       | 0       | 0       | 0        | 0        | 1       | 0      | 0      |
| Streptococcus          | 2              | 121            | 0        | 0        | 0        | 0        | 0       | 0       | 0       | 0       | 1        | 0        | 0       | 0       | 0       | 0        | 0        | 1       | 0      | 0      |
| Streptomyces           | 2              | 253            | 0        | 0        | 1        | 0        | 1       | 0       | 0       | 1       | 1        | 0        | 1       | 1       | 0       | 0        | 0        | 1       | 0      | 1      |
| Streptosporangium      | 3              | 148            | 0        | 0        | 0        | 0        | 0       | 0       | 0       | 0       | 1        | 0        | 0       | 1       | 0       | 0        | 0        | 1       | 0      | 0      |
| Strigomonas            | 1              | 2              | 0        | 0        | 0        | 0        | 0       | 0       | 0       | 0       | 0        | 0        | 0       | 0       | 0       | 0        | 0        | 0       | 0      | 0      |
| Sulfitobacter          | 1              | 10             | 0        | 0        | 0        | 0        | 0       | 0       | 0       | 0       | 0        | 0        | 0       | 0       | 0       | 0        | 0        | 0       | 0      | 0      |
| Sulfobacillus          | 1              | 30             | 0        | 0        | 0        | 0        | 0       | 0       | 0       | 0       | 0        | 0        | 0       | 0       | 0       | 0        | 0        | 0       | 0      | 0      |
| Sulfolobus             | 1              | 23             | 0        | 0        | 0        | 0        | 0       | 0       | 0       | 0       | 0        | 0        | 0       | 0       | 0       | 0        | 0        | 0       | 0      | 0      |
| Sulfuricurvum          | 2              | 67             | 0        | 0        | 0        | 0        | 0       | 0       | 0       | 0       | 0        | 0        | 0       | 0       | 0       | 0        | 0        | 1       | 0      | 0      |
| Sulfurihydrogenibium   | 2              | 55             | 0        | 0        | 0        | 0        | 0       | 0       | 0       | 0       | 0        | 0        | 0       | 0       | 0       | 0        | 0        | 1       | 0      | 0      |
| Sulfurimonas           | 2              | 60             | 0        | 0        | 0        | 0        | 0       | 0       | 0       | 0       | 0        | 0        | 0       | 0       | 0       | 0        | 0        | 1       | 0      | 0      |
| Sulfurospirillum       | 1              | 48             | 1        | 0        | 0        | 0        | 0       | 0       | 0       | 0       | 0        | 0        | 0       | 0       | 0       | 0        | 0        | 1       | 0      | 0      |
| Sulfurovum             | 2              | 48             | 1        | 0        | 0        | 0        | 0       | 0       | 0       | 0       | 0        | 0        | 0       | 0       | 0       | 0        | 0        | 1       | 0      | 0      |
| Symbiobacterium        | 2              | 68             | 0        | 0        | 0        | 0        | 0       | 0       | 0       | 0       | 0        | 0        | 0       | 0       | 0       | 0        | 0        | 1       | 0      | 0      |
| Synechococcus          | 1              | 34             | 0        | 0        | 0        | 0        | 0       | 0       | 0       | 0       | 0        | 0        | 0       | 0       | 0       | 0        | 0        | 0       | 1      | 0      |
| Synechocystis          | 1              | 40             | 0        | 0        | 0        | 0        | 0       | 0       | 0       | 0       | 0        | 0        | 0       | 0       | 0       | 0        | 0        | 0       | 1      | 0      |
| Synergistetes          | 1              | 27             | 0        | 0        | 0        | 0        | 0       | 0       | 0       | 0       | 0        | 0        | 1       | 0       | 0       | 0        | 0        | 0       | 0      | 0      |
| Syntrophobacter        | 2              | 101            | 0        | 0        | 0        | 0        | 0       | 0       | 0       | 0       | 0        | 0        | 0       | 0       | 0       | 0        | 0        | 1       | 0      | 1      |
| Syntrophobotulus       | 2              | 71             | 0        | 0        | 0        | 0        | 0       | 0       | 0       | 0       | 0        | 0        | 0       | 0       | 0       | 0        | 0        | 1       | 0      | 0      |
| Syntrophomonas         | 2              | 58             | 0        | 0        | 0        | 0        | 0       | 0       | 0       | 0       | 0        | 0        | 0       | 0       | 0       | 0        | 0        | 1       | 0      | 0      |
| Syntrophothermus       | 2              | 60             | 0        | 0        | 0        | 0        | 0       | 0       | 0       | 0       | 0        | 0        | 0       | 0       | 0       | 0        | 0        | 1       | 0      | 0      |
| Syntrophus             | 2              | 66             | 0        | 0        | 0        | 0        | 0       | 0       | 0       | 0       | 0        | 0        | 0       | 0       | 0       | 0        | 0        | 1       | 0      | 0      |
| Tannerella             | 1              | 8              | 0        | 0        | 0        | 0        | 0       | 0       | 0       | 0       | 0        | 0        | 0       | 0       | 0       | 0        | 0        | 0       | 0      | 0      |
| Taylorella             | 1              | 43             | 0        | 0        | 0        | 0        | 0       | 0       | 0       | 0       | 0        | 0        | 0       | 0       | 0       | 0        | 0        | 1       | 0      | 0      |
| Tepidanaerobacter      | 2              | 55             | 0        | 0        | 0        | 0        | 0       | 0       | 0       | 0       | 1        | 0        | 0       | 0       | 0       | 0        | 0        | 1       | 0      | 0      |
| Teredinibacter         | 2              | 109            | 0        | 0        | 0        | 0        | 0       | 0       | 0       | 0       | 0        | 0        | 1       | 0       | 0       | 0        | 0        | 1       | 0      | 0      |
| Terrabacter            | 1              | 1              | 0        | 0        | 0        | 0        | 0       | 0       | 0       | 0       | 0        | 0        | 0       | 0       | 0       | 0        | 0        | 0       | 0      | 0      |
| Terriglobus            | 2              | 83             | 0        | 0        | 0        | 0        | 0       | 0       | 0       | 0       | 1        | 0        | 0       | 0       | 0       | 0        | 0        | 1       | 0      | 0      |
| Tetragenococcus        | 1              | 12             | 0        | 0        | 0        | 0        | 0       | 0       | 0       | 0       | 0        | 0        | 0       | 0       | 0       | 0        | 0        | 0       | 0      | 0      |
| Thalassiobium          | 1              | 11             | 0        | 0        | 0        | 0        | 0       | 0       | 0       | 0       | 0        | 0        | 0       | 0       | 0       | 0        | 0        | 0       | 0      | 0      |
| Thalassobacter         | 1              | 9              | 0        | 0        | 0        | 0        | 0       | 0       | 0       | 0       | 0        | 0        | 0       | 0       | 0       | 0        | 0        | 0       | 0      | 0      |
| Thalassolituus         | 1              | 12             | 0        | 0        | 0        | 0        | 0       | 0       | 0       | 0       | 0        | 0        | 0       | 0       | 0       | 0        | 0        | 0       | 0      | 0      |
| Thalassospira          | 1              | 2              | 0        | 0        | 0        | 0        | 0       | 0       | 0       | 0       | 0        | 0        | 0       | 0       | 0       | 0        | 0        | 0       | 0      | 0      |
| Thauera                | 1              | 111            | 0        | 1        | 0        | 0        | 0       | 0       | 0       | 0       | 0        | 0        | 0       | 0       | 0       | 1        | 0        | 1       | 0      | 0      |
| Thermacetogenium       | 1              | 7              | 0        | 0        | 0        | 0        | 0       | 0       | 0       | 0       | 0        | 0        | 0       | 0       | 0       | 0        | 0        | 0       | 0      | 0      |
| Thermaerobacter        | 2              | 79             | 0        | 0        | 0        | 0        | 0       | 0       | 0       | 0       | 0        | 0        | 0       | 0       | 0       | 0        | 0        | 1       | 0      | 0      |
| Thermanaerovibrio      | 2              | 58             | 0        | 0        | 0        | 0        | 0       | 0       | 0       | 0       | 0        | 0        | 0       | 0       | 0       | 0        | 0        | 1       | 0      | 0      |
| Thermincola            | 2              | 62             | 0        | 0        | 0        | 0        | 0       | 0       | 0       | 0       | 0        | 0        | 0       | 0       | 0       | 0        | 0        | 1       | 0      | 0      |
| Thermoanaerobacter     | 2              | 76             | 0        | 0        | 0        | 0        | 0       | 0       | 0       | 0       | 1        | 0        | 1       | 0       | 0       | 0        | 0        | 1       | 0      | 0      |
| Thermoanaerobacterium  | 2              | 64             | 0        | 0        | 0        | 0        | 0       | 0       | 0       | 0       | 1        | 0        | 0       | 0       | 0       | 0        | 0        | 1       | 0      | 0      |
| Thermobacillus         | 1              | 11             | 0        | 0        | 0        | 0        | 0       | 0       | 0       | 0       | 0        | 0        | 0       | 0       | 0       | 0        | 0        | 0       | 0      | 0      |
| Thermobaculum          | 2              | 62             | 0        | 0        | 0        | 0        | 0       | 0       | 0       | 0       | 1        | 0        | 1       | 0       | 0       | 0        | 0        | 1       | 0      | 0      |
| Thermobifida           | 2              | 72             | 0        | 0        | 0        | 0        | 0       | 0       | 0       | 0       | 0        | 0        | 0       | 0       | 0       | 0        | 0        | 1       | 0      | 0      |
| Thermobispora          | 2              | 109            | 0        | 0        | 0        | 0        | 0       | 0       | 0       | 0       | 1        | 0        | 0       | 1       | 0       | 0        | 0        | 1       | 0      | 0      |
| Thermococcus           | 1              | 13             | 0        | 0        | 0        | 0        | 0       | 0       | 0       | 0       | 0        | 0        | 0       | 0       | 0       | 0        | 0        | 0       | 0      | 0      |
| Thermocrinis           | 2              | 60             | 0        | 0        | 0        | 0        | 0       | 0       | 0       | 0       | 0        | 0        | 0       | 0       | 0       | 0        | 0        | 1       | 0      | 0      |
| Thermodesulfator       | 1              | 10             | 0        | 0        | 0        | 0        | 0       | 0       | 0       | 0       | 0        | 0        | 0       | 0       | 0       | 0        | 0        | 0       | 0      | 0      |
| Thermodesulfobacterium | 1              | 9              | 0        | 0        | 0        | 0        | 0       | 0       | 0       | 0       | 0        | 0        | 0       | 0       | 0       | 0        | 0        | 0       | 0      | 0      |

| Genus                | Cluster Number | Protein Counts | 4.2.1.80 | 4.2.1.83 | 4.2.1.84 | 4.99.1.7 | 5.1.2.2 | 5.2.1.2 | 5.3.3.1 | 5.3.3.4 | 5.3.99.- | 5.4.99.- | 5.5.1.1 | 5.5.1.2 | 6.2.1.- | 6.2.1.25 | 6.2.1.32 | 6.3.5.2 | K00002 | K00055 |
|----------------------|----------------|----------------|----------|----------|----------|----------|---------|---------|---------|---------|----------|----------|---------|---------|---------|----------|----------|---------|--------|--------|
| Thermodesulfobium    | 1              | 13             | 0        | 0        | 0        | 0        | 0       | 0       | 0       | 0       | 0        | 0        | 0       | 0       | 0       | 0        | 0        | 0       | 0      | 0      |
| Thermodesulfovibrio  | 2              | 60             | 0        | 0        | 0        | 0        | 0       | 0       | 0       | 0       | 0        | 0        | 0       | 0       | 0       | 0        | 0        | 1       | 0      | 0      |
| Thermofilum          | 1              | 9              | 0        | 0        | 0        | 0        | 0       | 0       | 0       | 0       | 0        | 0        | 0       | 0       | 0       | 0        | 0        | 0       | 0      | 0      |
| Thermogladus         | 1              | 7              | 0        | 0        | 0        | 0        | 0       | 0       | 0       | 0       | 0        | 0        | 0       | 0       | 0       | 0        | 0        | 0       | 0      | 0      |
| Thermomicrobium      | 2              | 92             | 0        | 0        | 0        | 0        | 0       | 0       | 0       | 0       | 0        | 0        | 0       | 0       | 0       | 0        | 0        | 1       | 0      | 0      |
| Thermomonospora      | 2              | 125            | 0        | 0        | 0        | 0        | 0       | 0       | 0       | 0       | 0        | 0        | 0       | 1       | 0       | 0        | 0        | 1       | 0      | 1      |
| Thermoplasma         | 1              | 11             | 0        | 0        | 0        | 0        | 0       | 0       | 0       | 0       | 0        | 0        | 0       | 0       | 0       | 0        | 0        | 0       | 0      | 0      |
| Thermoplasmatales    | 1              | 6              | 0        | 0        | 0        | 0        | 0       | 0       | 0       | 0       | 0        | 0        | 0       | 0       | 0       | 0        | 0        | 0       | 0      | 0      |
| Thermoproteus        | 1              | 12             | 0        | 0        | 0        | 0        | 0       | 0       | 0       | 0       | 0        | 0        | 0       | 0       | 0       | 0        | 0        | 0       | 0      | 0      |
| Thermosediminibacter | 2              | 64             | 0        | 0        | 0        | 0        | 0       | 0       | 0       | 0       | 0        | 0        | 0       | 0       | 0       | 0        | 0        | 1       | 0      | 0      |
| Thermosipho          | 2              | 70             | 0        | 0        | 0        | 0        | 0       | 0       | 0       | 0       | 0        | 0        | 0       | 0       | 0       | 0        | 0        | 1       | 0      | 0      |
| Thermosphaera        | 1              | 10             | 0        | 0        | 0        | 0        | 0       | 0       | 0       | 0       | 0        | 0        | 0       | 0       | 0       | 0        | 0        | 0       | 0      | 0      |
| Thermosynechococcus  | 1              | 6              | 0        | 0        | 0        | 0        | 0       | 0       | 0       | 0       | 0        | 0        | 0       | 0       | 0       | 0        | 0        | 0       | 0      | 0      |
| Thermotoga           | 2              | 80             | 0        | 0        | 0        | 0        | 0       | 0       | 0       | 0       | 1        | 0        | 1       | 0       | 0       | 0        | 0        | 1       | 0      | 0      |
| Thermovibrio         | 2              | 58             | 0        | 0        | 0        | 0        | 0       | 0       | 0       | 0       | 0        | 0        | 0       | 0       | 0       | 0        | 0        | 1       | 0      | 0      |
| Thermovirga          | 1              | 9              | 0        | 0        | 0        | 0        | 0       | 0       | 0       | 0       | 0        | 0        | 0       | 0       | 0       | 0        | 0        | 0       | 0      | 0      |
| Thermus              | 2              | 107            | 0        | 0        | 0        | 0        | 0       | 0       | 0       | 0       | 0        | 0        | 1       | 0       | 0       | 0        | 0        | 1       | 0      | 0      |
| Thioalkalimicrobium  | 1              | 4              | 0        | 0        | 0        | 0        | 0       | 0       | 0       | 0       | 0        | 0        | 0       | 0       | 0       | 0        | 0        | 0       | 0      | 0      |
| Thioalkalivibrio     | 2              | 91             | 0        | 0        | 0        | 0        | 0       | 0       | 0       | 0       | 0        | 0        | 0       | 0       | 0       | 0        | 0        | 1       | 0      | 0      |
| Thiobaca             | 1              | 2              | 0        | 0        | 0        | 0        | 0       | 0       | 0       | 0       | 0        | 0        | 0       | 0       | 0       | 0        | 0        | 0       | 0      | 0      |
| Thiobacillus         | 2              | 67             | 0        | 0        | 0        | 0        | 0       | 0       | 0       | 0       | 0        | 0        | 0       | 0       | 0       | 0        | 0        | 1       | 0      | 0      |
| Thiocapsa            | 1              | 2              | 0        | 0        | 0        | 0        | 0       | 0       | 0       | 0       | 0        | 0        | 0       | 0       | 0       | 0        | 0        | 0       | 0      | 0      |
| Thiocystis           | 1              | 11             | 0        | 0        | 0        | 0        | 0       | 0       | 0       | 0       | 0        | 0        | 0       | 0       | 0       | 0        | 0        | 0       | 0      | 0      |
| Thioflavococcus      | 1              | 13             | 0        | 0        | 0        | 0        | 0       | 0       | 0       | 0       | 0        | 0        | 0       | 0       | 0       | 0        | 0        | 0       | 0      | 0      |
| Thiomicrospira       | 2              | 50             | 0        | 0        | 0        | 0        | 0       | 0       | 0       | 0       | 0        | 0        | 0       | 0       | 0       | 0        | 0        | 1       | 0      | 0      |
| Thiomonas            | 2              | 85             | 0        | 0        | 0        | 0        | 0       | 0       | 0       | 0       | 0        | 0        | 0       | 0       | 0       | 0        | 0        | 1       | 0      | 0      |
| Thiorhodococcus      | 1              | 2              | 0        | 0        | 0        | 0        | 0       | 0       | 0       | 0       | 0        | 0        | 0       | 0       | 0       | 0        | 0        | 0       | 0      | 0      |
| Thiothrix            | 1              | 2              | 0        | 0        | 0        | 0        | 0       | 0       | 0       | 0       | 0        | 0        | 0       | 0       | 0       | 0        | 0        | 0       | 0      | 0      |
| Tistrella            | 1              | 42             | 0        | 0        | 0        | 0        | 0       | 0       | 0       | 0       | 0        | 0        | 0       | 0       | 0       | 0        | 0        | 0       | 0      | 0      |
| Tolumonas            | 2              | 100            | 0        | 0        | 0        | 0        | 0       | 0       | 0       | 0       | 0        | 0        | 1       | 0       | 0       | 0        | 0        | 1       | 0      | 0      |
| Transposon           | 1              | 2              | 0        | 0        | 0        | 0        | 0       | 0       | 0       | 0       | 0        | 0        | 0       | 0       | 0       | 0        | 0        | 0       | 0      | 0      |
| Treponema            | 1              | 63             | 0        | 0        | 0        | 0        | 0       | 0       | 0       | 0       | 0        | 0        | 0       | 0       | 0       | 0        | 0        | 1       | 0      | 0      |
| Trichodesmium        | 2              | 71             | 0        | 0        | 0        | 0        | 0       | 1       | 0       | 0       | 0        | 0        | 0       | 0       | 0       | 0        | 0        | 1       | 0      | 0      |
| Trichormus           | 1              | 12             | 0        | 0        | 0        | 0        | 0       | 0       | 0       | 0       | 0        | 0        | 0       | 0       | 0       | 0        | 0        | 1       | 0      | 0      |
| Tropheryma           | 2              | 22             | 0        | 0        | 0        | 0        | 0       | 0       | 0       | 0       | 0        | 0        | 0       | 0       | 0       | 0        | 0        | 1       | 0      | 0      |
| Truepera             | 2              | 104            | 0        | 0        | 0        | 0        | 0       | 1       | 0       | 0       | 1        | 0        | 1       | 0       | 0       | 0        | 0        | 1       | 0      | 0      |
| Tsukamurella         | 2              | 123            | 0        | 0        | 0        | 0        | 0       | 0       | 0       | 0       | 0        | 0        | 0       | 1       | 0       | 0        | 0        | 1       | 0      | 1      |
| Turneriella          | 1              | 16             | 0        | 0        | 0        | 0        | 0       | 0       | 0       | 0       | 0        | 0        | 0       | 0       | 0       | 0        | 0        | 0       | 0      | 0      |
| Uliginosibacterium   | 1              | 2              | 0        | 0        | 0        | 0        | 0       | 0       | 0       | 0       | 0        | 0        | 0       | 0       | 0       | 0        | 0        | 0       | 0      | 0      |
| Ureaplasma           | 1              | 24             | 0        | 0        | 0        | 0        | 0       | 0       | 0       | 0       | 0        | 0        | 0       | 0       | 0       | 0        | 0        | 0       | 0      | 0      |
| Ureibacillus         | 1              | 2              | 0        | 0        | 0        | 0        | 0       | 0       | 0       | 0       | 0        | 0        | 0       | 0       | 0       | 0        | 0        | 0       | 0      | 0      |
| Variovorax           | 3              | 187            | 0        | 1        | 1        | 0        | 0       | 0       | 0       | 1       | 1        | 0        | 1       | 1       | 0       | 1        | 0        | 1       | 0      | 0      |
| Veillonella          | 1              | 54             | 0        | 0        | 0        | 0        | 0       | 0       | 0       | 0       | 0        | 0        | 0       | 0       | 0       | 0        | 0        | 1       | 0      | 0      |
| Verminephrobacter    | 3              | 188            | 0        | 1        | 0        | 0        | 1       | 0       | 0       | 1       | 1        | 0        | 0       | 1       | 0       | 1        | 0        | 1       | 0      | 0      |
| Verrucosispora       | 3              | 126            | 0        | 0        | 0        | 0        | 0       | 0       | 0       | 0       | 0        | 0        | 1       | 1       | 0       | 0        | 0        | 1       | 0      | 0      |
| Vibrio               | 2              | 195            | 1        | 0        | 0        | 0        | 0       | 1       | 0       | 0       | 0        | 0        | 1       | 0       | 0       | 0        | 0        | 1       | 0      | 0      |
| Vibrionales          | 1              | 46             | 0        | 0        | 0        | 0        | 0       | 0       | 0       | 0       | 0        | 0        | 0       | 0       | 0       | 0        | 0        | 1       | 0      | 0      |
| Vitreoscilla         | 1              | 1              | 0        | 0        | 0        | 0        | 0       | 0       | 0       | 0       | 0        | 0        | 0       | 0       | 0       | 0        | 0        | 0       | 0      | 0      |
| Vulcanisaeta         | 1              | 14             | 0        | 0        | 0        | 0        | 0       | 0       | 0       | 0       | 0        | 0        | 0       | 0       | 0       | 0        | 0        | 0       | 0      | 0      |
| Waddlia              | 2              | 68             | 0        | 0        | 0        | 0        | 0       | 0       | 0       | 0       | 0        | 0        | 0       | 0       | 0       | 0        | 0        | 1       | 0      | 0      |
| Wautersia            | 1              | 2              | 0        | 0        | 0        | 0        | 0       | 0       | 0       | 0       | 0        | 0        | 0       | 0       | 0       | 0        | 0        | 0       | 0      | 0      |
| Weeksella            | 2              | 65             | 0        | 1        | 0        | 0        | 0       | 0       | 0       | 0       | 0        | 0        | 0       | 0       | 0       | 0        | 0        | 1       | 0      | 0      |

| Genus             | Cluster Number | Protein Counts | 4.2.1.80 | 4.2.1.83 | 4.2.1.84 | 4.99.1.7 | 5.1.2.2 | 5.2.1.2 | 5.3.3.1 | 5.3.3.4 | 5.3.99.- | 5.4.99.- | 5.5.1.1 | 5.5.1.2 | 6.2.1.- | 6.2.1.25 | 6.2.1.32 | 6.3.5.2 | K00002 | K00055 |
|-------------------|----------------|----------------|----------|----------|----------|----------|---------|---------|---------|---------|----------|----------|---------|---------|---------|----------|----------|---------|--------|--------|
| Weissella         | 1              | 14             | 0        | 0        | 0        | 0        | 0       | 0       | 0       | 0       | 0        | 0        | 0       | 0       | 0       | 0        | 0        | 0       | 0      | 0      |
| Wenxinia          | 1              | 2              | 0        | 0        | 0        | 0        | 0       | 0       | 0       | 0       | 0        | 0        | 0       | 0       | 0       | 0        | 0        | 0       | 0      | 0      |
| Wigglesworthia    | 1              | 29             | 0        | 0        | 0        | 0        | 0       | 0       | 0       | 0       | 0        | 0        | 0       | 0       | 0       | 0        | 0        | 1       | 0      | 0      |
| Wolbachia         | 1              | 32             | 0        | 0        | 0        | 0        | 0       | 0       | 0       | 0       | 0        | 0        | 0       | 0       | 0       | 0        | 0        | 1       | 0      | 0      |
| Wolinella         | 2              | 51             | 0        | 0        | 0        | 0        | 0       | 0       | 0       | 0       | 0        | 0        | 0       | 0       | 0       | 0        | 0        | 1       | 0      | 0      |
| Xanthobacter      | 3              | 176            | 0        | 0        | 0        | 0        | 0       | 0       | 0       | 1       | 0        | 0        | 1       | 1       | 0       | 0        | 0        | 1       | 0      | 0      |
| Xanthobacteraceae | 1              | 4              | 0        | 0        | 0        | 0        | 0       | 0       | 0       | 0       | 0        | 0        | 0       | 0       | 0       | 0        | 0        | 0       | 0      | 0      |
| Xanthomonadaceae  | 1              | 39             | 0        | 0        | 0        | 0        | 0       | 0       | 0       | 0       | 0        | 0        | 0       | 0       | 0       | 0        | 0        | 1       | 0      | 0      |
| Xanthomonas       | 2              | 162            | 1        | 1        | 0        | 0        | 0       | 1       | 0       | 0       | 1        | 0        | 0       | 1       | 0       | 0        | 0        | 1       | 0      | 0      |
| Xenorhabdus       | 2              | 127            | 0        | 0        | 0        | 0        | 0       | 0       | 0       | 0       | 0        | 0        | 0       | 0       | 0       | 0        | 0        | 1       | 0      | 0      |
| Xylanimonas       | 2              | 66             | 0        | 0        | 0        | 0        | 0       | 0       | 0       | 0       | 1        | 0        | 0       | 0       | 0       | 0        | 0        | 1       | 0      | 0      |
| Xylella           | 2              | 52             | 0        | 0        | 0        | 0        | 0       | 0       | 0       | 0       | 0        | 0        | 0       | 0       | 0       | 0        | 0        | 1       | 1      | 0      |
| Yersinia          | 2              | 145            | 0        | 0        | 0        | 0        | 0       | 0       | 0       | 0       | 0        | 0        | 0       | 0       | 0       | 0        | 0        | 1       | 0      | 0      |
| Yokenella         | 2              | 61             | 0        | 0        | 0        | 0        | 0       | 0       | 0       | 0       | 0        | 0        | 0       | 0       | 0       | 0        | 0        | 1       | 0      | 0      |
| Zobellia          | 1              | 28             | 0        | 0        | 0        | 0        | 0       | 0       | 0       | 0       | 1        | 0        | 0       | 0       | 0       | 0        | 0        | 0       | 0      | 0      |
| Zunongwangia      | 2              | 98             | 0        | 0        | 0        | 0        | 0       | 0       | 0       | 0       | 1        | 0        | 1       | 0       | 0       | 0        | 0        | 1       | 1      | 0      |
| Zymomonas         | 2              | 67             | 0        | 0        | 0        | 0        | 0       | 0       | 0       | 0       | 0        | 0        | 0       | 0       | 0       | 0        | 0        | 1       | 0      | 0      |
| Zymophilus        | 1              | 2              | 0        | 0        | 0        | 0        | 0       | 0       | 0       | 0       | 0        | 0        | 0       | 0       | 0       | 0        | 0        | 0       | 0      | 0      |



| Genus               | Cluster Number | Protein Counts | K00074 | K00088 | K00100 | K00106 | K00114 | K00128 | K00129 | K00132 | K00141 | K00146 | K00148 | K00152 | K00155 | K00169 | K00217 | K00224 | K00274 | K00446 |
|---------------------|----------------|----------------|--------|--------|--------|--------|--------|--------|--------|--------|--------|--------|--------|--------|--------|--------|--------|--------|--------|--------|
| Acaricomes          | 1              | 2              | 0      | 0      | 0      | 0      | 0      | 0      | 0      | 0      | 0      | 0      | 0      | 0      | 0      | 0      | 0      | 0      | 0      | 0      |
| Acaryochloris       | 2              | 88             | 0      | 1      | 0      | 0      | 0      | 1      | 0      | 0      | 0      | 0      | 0      | 0      | 0      | 0      | 0      | 0      | 0      | 0      |
| Acetivibrio         | 1              | 2              | 0      | 0      | 0      | 0      | 0      | 0      | 0      | 0      | 0      | 0      | 0      | 0      | 0      | 0      | 0      | 0      | 0      | 0      |
| Acetobacter         | 2              | 85             | 0      | 1      | 1      | 0      | 1      | 1      | 0      | 0      | 0      | 1      | 0      | 0      | 0      | 0      | 0      | 0      | 0      | 0      |
| Acetobacteraceae    | 1              | 2              | 0      | 0      | 0      | 0      | 0      | 0      | 0      | 0      | 0      | 0      | 0      | 0      | 0      | 0      | 0      | 0      | 0      | 0      |
| Acetobacterium      | 1              | 8              | 0      | 1      | 0      | 0      | 0      | 0      | 0      | 0      | 0      | 0      | 0      | 0      | 0      | 0      | 0      | 0      | 0      | 0      |
| Acetohalobium       | 2              | 79             | 0      | 1      | 0      | 0      | 0      | 0      | 0      | 0      | 0      | 0      | 0      | 0      | 0      | 1      | 0      | 0      | 0      | 0      |
| Acholeplasma        | 2              | 38             | 0      | 0      | 0      | 0      | 0      | 1      | 0      | 0      | 0      | 0      | 0      | 0      | 0      | 0      | 0      | 0      | 0      | 0      |
| Achromobacter       | 2              | 192            | 1      | 1      | 0      | 0      | 0      | 1      | 0      | 0      | 0      | 1      | 1      | 0      | 0      | 0      | 0      | 0      | 0      | 0      |
| Acidaminococcus     | 1              | 65             | 1      | 1      | 0      | 0      | 0      | 0      | 0      | 0      | 0      | 0      | 0      | 0      | 0      | 0      | 0      | 0      | 0      | 0      |
| Acidianus           | 1              | 9              | 1      | 0      | 0      | 0      | 0      | 0      | 0      | 0      | 0      | 0      | 0      | 0      | 0      | 1      | 0      | 0      | 0      | 0      |
| Acidilobus          | 1              | 8              | 0      | 1      | 0      | 0      | 0      | 0      | 0      | 0      | 0      | 0      | 0      | 0      | 0      | 1      | 0      | 0      | 0      | 0      |
| Acidimicrobium      | 2              | 58             | 1      | 1      | 0      | 0      | 0      | 0      | 0      | 0      | 0      | 0      | 0      | 0      | 0      | 0      | 0      | 0      | 0      | 0      |
| Acidiphilium        | 3              | 144            | 1      | 1      | 1      | 0      | 1      | 1      | 0      | 0      | 0      | 0      | 0      | 0      | 1      | 0      | 0      | 0      | 1      | 0      |
| Acidithiobacillus   | 2              | 70             | 0      | 1      | 0      | 0      | 0      | 1      | 0      | 0      | 0      | 0      | 0      | 0      | 0      | 0      | 0      | 0      | 1      | 0      |
| Acidobacterium      | 2              | 91             | 1      | 1      | 0      | 0      | 0      | 1      | 0      | 0      | 0      | 0      | 0      | 0      | 0      | 0      | 0      | 0      | 0      | 0      |
| Acidocella          | 1              | 2              | 0      | 0      | 0      | 0      | 0      | 0      | 0      | 0      | 0      | 0      | 0      | 0      | 0      | 0      | 0      | 0      | 0      | 0      |
| Acidothermus        | 2              | 68             | 1      | 1      | 0      | 0      | 0      | 1      | 0      | 0      | 0      | 0      | 0      | 0      | 0      | 1      | 0      | 0      | 0      | 0      |
| Acidovorax          | 3              | 217            | 1      | 1      | 1      | 0      | 0      | 1      | 0      | 0      | 1      | 0      | 0      | 0      | 0      | 0      | 0      | 0      | 0      | 1      |
| Aciduliprofundum    | 1              | 11             | 0      | 1      | 0      | 0      | 0      | 0      | 0      | 0      | 0      | 0      | 0      | 0      | 0      | 1      | 0      | 0      | 0      | 0      |
| Acinetobacter       | 3              | 188            | 1      | 1      | 1      | 0      | 0      | 1      | 0      | 0      | 1      | 1      | 0      | 0      | 1      | 0      | 0      | 0      | 0      | 0      |
| Actinobacillus      | 2              | 112            | 0      | 1      | 1      | 0      | 0      | 0      | 0      | 0      | 0      | 0      | 0      | 0      | 0      | 0      | 0      | 0      | 0      | 0      |
| Actinomadura        | 1              | 1              | 0      | 0      | 0      | 0      | 0      | 0      | 0      | 0      | 0      | 0      | 0      | 0      | 0      | 0      | 0      | 0      | 0      | 0      |
| Actinoplanes        | 1              | 52             | 1      | 1      | 0      | 0      | 0      | 0      | 0      | 0      | 1      | 0      | 1      | 0      | 0      | 0      | 0      | 0      | 1      | 0      |
| Actinopolyspora     | 1              | 2              | 0      | 0      | 0      | 0      | 0      | 0      | 0      | 0      | 0      | 0      | 0      | 0      | 0      | 0      | 0      | 0      | 0      | 0      |
| Actinosynnema       | 2              | 122            | 1      | 1      | 0      | 0      | 0      | 1      | 0      | 0      | 1      | 0      | 0      | 0      | 0      | 0      | 0      | 0      | 0      | 0      |
| Advenella           | 1              | 30             | 1      | 0      | 0      | 0      | 0      | 1      | 0      | 0      | 0      | 0      | 0      | 0      | 0      | 0      | 0      | 0      | 0      | 0      |
| Aequorivita         | 1              | 12             | 1      | 1      | 0      | 0      | 0      | 0      | 0      | 0      | 0      | 0      | 0      | 0      | 0      | 0      | 0      | 0      | 0      | 0      |
| Aerococcus          | 2              | 57             | 1      | 1      | 0      | 0      | 0      | 1      | 0      | 0      | 0      | 0      | 0      | 0      | 0      | 0      | 0      | 0      | 0      | 0      |
| Aeromonas           | 2              | 127            | 0      | 1      | 0      | 0      | 0      | 1      | 0      | 0      | 0      | 0      | 0      | 0      | 0      | 0      | 0      | 0      | 0      | 0      |
| Aeropyrum           | 1              | 13             | 0      | 1      | 0      | 0      | 0      | 0      | 0      | 0      | 0      | 0      | 0      | 0      | 0      | 0      | 0      | 0      | 0      | 0      |
| Afipia              | 1              | 54             | 1      | 1      | 1      | 0      | 0      | 1      | 0      | 0      | 0      | 0      | 0      | 0      | 0      | 0      | 0      | 0      | 0      | 0      |
| Aggregatibacter     | 1              | 81             | 0      | 1      | 0      | 0      | 0      | 0      | 0      | 0      | 0      | 0      | 0      | 0      | 0      | 0      | 0      | 0      | 0      | 0      |
| Agrobacterium       | 2              | 242            | 1      | 1      | 1      | 1      | 0      | 1      | 0      | 0      | 0      | 1      | 1      | 0      | 1      | 0      | 0      | 0      | 1      | 1      |
| Ahrensia            | 1              | 2              | 0      | 0      | 0      | 0      | 0      | 0      | 0      | 0      | 0      | 0      | 0      | 0      | 0      | 0      | 0      | 0      | 0      | 0      |
| Akkermansia         | 2              | 47             | 0      | 1      | 1      | 0      | 0      | 0      | 0      | 0      | 0      | 0      | 0      | 0      | 0      | 0      | 0      | 0      | 0      | 0      |
| Albidiferax         | 3              | 144            | 1      | 1      | 0      | 0      | 0      | 1      | 0      | 0      | 0      | 0      | 0      | 0      | 0      | 1      | 0      | 0      | 0      | 0      |
| Alcaligenes         | 1              | 21             | 0      | 0      | 0      | 0      | 0      | 0      | 0      | 0      | 0      | 0      | 1      | 0      | 0      | 0      | 0      | 0      | 0      | 0      |
| Alcanivorax         | 2              | 146            | 0      | 1      | 1      | 0      | 1      | 1      | 0      | 0      | 0      | 1      | 1      | 0      | 1      | 0      | 0      | 0      | 0      | 0      |
| Alicyclophilus      | 3              | 152            | 1      | 1      | 0      | 0      | 0      | 1      | 0      | 0      | 0      | 1      | 0      | 0      | 0      | 0      | 0      | 0      | 0      | 1      |
| Alicyclobacillus    | 2              | 91             | 1      | 1      | 1      | 0      | 0      | 1      | 0      | 0      | 0      | 1      | 0      | 0      | 0      | 0      | 0      | 0      | 0      | 1      |
| Aliivibrio          | 2              | 118            | 0      | 1      | 1      | 0      | 0      | 1      | 0      | 0      | 0      | 0      | 0      | 0      | 0      | 0      | 0      | 0      | 1      | 0      |
| Alishewanella       | 1              | 1              | 0      | 0      | 0      | 0      | 0      | 0      | 0      | 0      | 0      | 0      | 0      | 0      | 0      | 0      | 0      | 0      | 0      | 0      |
| Alistipes           | 1              | 52             | 0      | 1      | 0      | 0      | 0      | 0      | 0      | 0      | 0      | 0      | 0      | 0      | 0      | 0      | 0      | 0      | 0      | 0      |
| Alkalilimnicola     | 2              | 97             | 0      | 1      | 0      | 0      | 1      | 1      | 0      | 0      | 0      | 0      | 0      | 0      | 0      | 0      | 0      | 0      | 0      | 0      |
| Alkaliphilus        | 2              | 62             | 1      | 1      | 1      | 0      | 0      | 1      | 0      | 1      | 0      | 0      | 0      | 0      | 0      | 0      | 0      | 0      | 0      | 0      |
| Allochromatium      | 2              | 84             | 0      | 1      | 0      | 0      | 0      | 0      | 0      | 0      | 0      | 0      | 0      | 0      | 0      | 0      | 0      | 0      | 0      | 0      |
| Alphaproteobacteria | 1              | 3              | 0      | 0      | 0      | 0      | 0      | 0      | 0      | 0      | 0      | 0      | 0      | 0      | 0      | 0      | 0      | 0      | 0      | 0      |
| Alteromonadales     | 1              | 12             | 0      | 0      | 0      | 0      | 0      | 0      | 0      | 0      | 0      | 0      | 0      | 0      | 0      | 0      | 0      | 0      | 0      | 0      |
| Alteromonas         | 1              | 37             | 0      | 1      | 0      | 0      | 1      | 1      | 0      | 0      | 0      | 0      | 0      | 0      | 0      | 0      | 0      | 0      | 0      | 0      |
| Aminobacter         | 1              | 4              | 0      | 0      | 0      | 0      | 0      | 0      | 0      | 0      | 0      | 0      | 0      | 0      | 0      | 0      | 0      | 0      | 0      | 0      |
| Aminobacterium      | 2              | 59             | 0      | 1      | 0      | 0      | 0      | 0      | 0      | 0      | 0      | 0      | 0      | 0      | 0      | 1      | 0      | 0      | 0      | 0      |

| Genus            | Cluster Number | Protein Counts | K00074 | K00088 | K00100 | K00106 | K00114 | K00128 | K00129 | K00132 | K00141 | K00146 | K00148 | K00152 | K00155 | K00169 | K00217 | K00224 | K00274 | K00446 |
|------------------|----------------|----------------|--------|--------|--------|--------|--------|--------|--------|--------|--------|--------|--------|--------|--------|--------|--------|--------|--------|--------|
| Ammonifex        | 2              | 50             | 0      | 1      | 0      | 0      | 0      | 0      | 0      | 0      | 0      | 0      | 0      | 0      | 0      | 0      | 0      | 0      | 0      | 0      |
| Amphibacillus    | 1              | 13             | 0      | 1      | 0      | 0      | 0      | 1      | 0      | 0      | 0      | 0      | 0      | 0      | 0      | 0      | 0      | 0      | 0      | 0      |
| Amphritea        | 1              | 2              | 0      | 0      | 0      | 0      | 0      | 0      | 0      | 0      | 0      | 0      | 0      | 0      | 0      | 0      | 0      | 0      | 0      | 0      |
| Amycolatopsis    | 2              | 201            | 1      | 1      | 0      | 0      | 0      | 1      | 0      | 0      | 1      | 0      | 1      | 0      | 0      | 0      | 0      | 0      | 1      | 1      |
| Amycolicoccus    | 1              | 43             | 1      | 1      | 0      | 0      | 0      | 1      | 0      | 0      | 0      | 0      | 0      | 0      | 0      | 0      | 0      | 0      | 1      | 0      |
| Anabaena         | 2              | 92             | 0      | 1      | 0      | 0      | 0      | 1      | 1      | 0      | 0      | 0      | 0      | 0      | 0      | 0      | 0      | 0      | 0      | 0      |
| Anaerobaculum    | 1              | 11             | 0      | 1      | 0      | 0      | 0      | 0      | 0      | 0      | 0      | 0      | 0      | 0      | 0      | 1      | 0      | 0      | 0      | 0      |
| Anaerococcus     | 2              | 46             | 1      | 1      | 0      | 0      | 0      | 1      | 0      | 0      | 0      | 0      | 0      | 0      | 0      | 0      | 0      | 0      | 0      | 0      |
| Anaerolinea      | 2              | 66             | 0      | 1      | 0      | 0      | 0      | 0      | 0      | 0      | 0      | 0      | 0      | 0      | 0      | 0      | 0      | 0      | 0      | 0      |
| Anaeromyxobacter | 3              | 117            | 1      | 1      | 0      | 0      | 0      | 0      | 1      | 0      | 0      | 0      | 1      | 0      | 0      | 0      | 0      | 0      | 0      | 0      |
| Anaerostipes     | 1              | 44             | 1      | 1      | 0      | 0      | 0      | 0      | 0      | 0      | 0      | 0      | 0      | 0      | 0      | 1      | 0      | 0      | 0      | 0      |
| Anaerotruncus    | 1              | 2              | 0      | 0      | 0      | 0      | 0      | 0      | 0      | 0      | 0      | 0      | 0      | 0      | 0      | 0      | 0      | 0      | 0      | 0      |
| Anaplasma        | 1              | 35             | 0      | 1      | 0      | 0      | 0      | 0      | 0      | 0      | 0      | 0      | 0      | 0      | 0      | 0      | 0      | 0      | 0      | 0      |
| Ancylobacter     | 1              | 3              | 0      | 0      | 0      | 0      | 0      | 0      | 0      | 0      | 0      | 0      | 0      | 0      | 0      | 0      | 0      | 0      | 0      | 0      |
| Aneurinibacillus | 1              | 1              | 0      | 0      | 0      | 0      | 0      | 0      | 0      | 0      | 0      | 0      | 0      | 0      | 0      | 0      | 0      | 0      | 0      | 0      |
| Angomonas        | 1              | 1              | 0      | 1      | 0      | 0      | 0      | 0      | 0      | 0      | 0      | 0      | 0      | 0      | 0      | 0      | 0      | 0      | 0      | 0      |
| Anoxybacillus    | 2              | 72             | 1      | 1      | 1      | 0      | 0      | 1      | 0      | 0      | 0      | 0      | 0      | 0      | 0      | 0      | 0      | 0      | 0      | 0      |
| Aquifex          | 2              | 45             | 0      | 1      | 0      | 0      | 0      | 0      | 0      | 0      | 0      | 0      | 0      | 0      | 0      | 1      | 0      | 0      | 0      | 0      |
| Aquimarina       | 1              | 2              | 0      | 0      | 0      | 0      | 0      | 0      | 0      | 0      | 0      | 0      | 0      | 0      | 0      | 0      | 0      | 0      | 0      | 0      |
| Arcanobacterium  | 2              | 45             | 0      | 1      | 0      | 0      | 0      | 0      | 0      | 0      | 0      | 0      | 0      | 0      | 0      | 0      | 0      | 0      | 0      | 0      |
| Archaeoglobus    | 1              | 14             | 1      | 1      | 0      | 0      | 0      | 0      | 0      | 0      | 0      | 0      | 0      | 0      | 0      | 1      | 0      | 0      | 0      | 0      |
| Arcobacter       | 2              | 101            | 1      | 1      | 1      | 0      | 1      | 1      | 0      | 0      | 0      | 0      | 0      | 0      | 0      | 1      | 0      | 0      | 0      | 1      |
| Aromatoleum      | 3              | 133            | 1      | 1      | 0      | 0      | 0      | 1      | 0      | 0      | 1      | 0      | 0      | 0      | 0      | 1      | 0      | 0      | 0      | 0      |
| Arsenophonus     | 1              | 4              | 0      | 0      | 0      | 0      | 0      | 0      | 0      | 0      | 0      | 0      | 0      | 0      | 0      | 0      | 0      | 0      | 0      | 0      |
| Arthrobacter     | 2              | 206            | 1      | 1      | 0      | 0      | 0      | 1      | 0      | 0      | 0      | 1      | 1      | 0      | 0      | 0      | 0      | 0      | 0      | 1      |
| Arthrospira      | 2              | 67             | 0      | 1      | 0      | 0      | 0      | 0      | 0      | 0      | 0      | 0      | 0      | 0      | 0      | 0      | 0      | 0      | 0      | 0      |
| Aster            | 1              | 10             | 0      | 0      | 0      | 0      | 0      | 0      | 0      | 0      | 0      | 0      | 0      | 0      | 0      | 0      | 0      | 0      | 0      | 0      |
| Asticcacaulis    | 2              | 103            | 1      | 1      | 0      | 0      | 0      | 1      | 0      | 0      | 0      | 0      | 0      | 0      | 0      | 0      | 0      | 0      | 0      | 0      |
| Atopobium        | 1              | 28             | 1      | 1      | 0      | 0      | 0      | 0      | 0      | 0      | 0      | 0      | 0      | 0      | 0      | 0      | 0      | 0      | 0      | 0      |
| Aurantimonas     | 1              | 2              | 0      | 0      | 0      | 0      | 0      | 0      | 0      | 0      | 0      | 0      | 0      | 0      | 0      | 0      | 0      | 0      | 0      | 0      |
| Avibacterium     | 1              | 17             | 0      | 1      | 0      | 0      | 0      | 0      | 0      | 0      | 0      | 0      | 0      | 0      | 0      | 0      | 0      | 0      | 0      | 0      |
| Azoarcus         | 3              | 172            | 1      | 1      | 1      | 0      | 1      | 1      | 0      | 0      | 1      | 1      | 1      | 0      | 1      | 1      | 0      | 0      | 1      | 1      |
| Azorhizobium     | 3              | 149            | 1      | 1      | 0      | 0      | 0      | 1      | 0      | 0      | 0      | 0      | 0      | 0      | 0      | 0      | 0      | 0      | 1      | 0      |
| Azorhizophilus   | 1              | 4              | 0      | 0      | 0      | 0      | 0      | 0      | 0      | 0      | 0      | 0      | 0      | 0      | 0      | 0      | 0      | 0      | 0      | 0      |
| Azospira         | 1              | 19             | 1      | 1      | 1      | 0      | 0      | 1      | 0      | 0      | 0      | 0      | 0      | 0      | 0      | 0      | 0      | 0      | 0      | 0      |
| Azospirillum     | 2              | 198            | 1      | 1      | 0      | 0      | 1      | 1      | 0      | 0      | 1      | 1      | 0      | 0      | 0      | 0      | 0      | 0      | 1      | 0      |
| Azotobacter      | 3              | 183            | 1      | 1      | 0      | 0      | 0      | 1      | 0      | 0      | 0      | 0      | 0      | 0      | 0      | 0      | 0      | 0      | 1      | 1      |
| Bacillales       | 1              | 9              | 0      | 1      | 0      | 0      | 0      | 0      | 0      | 0      | 0      | 0      | 0      | 0      | 0      | 0      | 0      | 0      | 0      | 1      |
| Bacilli          | 1              | 3              | 0      | 0      | 0      | 0      | 0      | 0      | 0      | 0      | 0      | 0      | 0      | 0      | 0      | 0      | 0      | 0      | 0      | 0      |
| Bacillus         | 2              | 237            | 1      | 1      | 1      | 0      | 0      | 1      | 0      | 0      | 0      | 1      | 1      | 0      | 0      | 1      | 0      | 0      | 1      | 1      |
| Bacteria         | 2              | 86             | 1      | 1      | 0      | 0      | 0      | 1      | 0      | 0      | 0      | 0      | 0      | 0      | 0      | 0      | 0      | 0      | 0      | 0      |
| Bacteriovorax    | 2              | 98             | 1      | 1      | 0      | 0      | 0      | 1      | 0      | 0      | 0      | 0      | 0      | 0      | 0      | 0      | 0      | 0      | 0      | 0      |
| Bacteroidales    | 2              | 59             | 0      | 1      | 0      | 0      | 0      | 0      | 0      | 0      | 0      | 0      | 0      | 0      | 0      | 0      | 0      | 0      | 0      | 0      |
| Bacteroides      | 2              | 96             | 0      | 1      | 1      | 0      | 0      | 0      | 0      | 0      | 0      | 0      | 0      | 0      | 0      | 0      | 0      | 0      | 0      | 0      |
| Bacteroidetes    | 1              | 2              | 0      | 0      | 0      | 0      | 0      | 0      | 0      | 0      | 0      | 0      | 0      | 0      | 0      | 0      | 0      | 0      | 0      | 0      |
| Bartonella       | 2              | 50             | 0      | 1      | 0      | 0      | 0      | 1      | 0      | 0      | 0      | 0      | 0      | 0      | 0      | 0      | 0      | 0      | 0      | 0      |
| Baumannia        | 2              | 24             | 0      | 1      | 0      | 0      | 0      | 0      | 0      | 0      | 0      | 0      | 0      | 0      | 0      | 0      | 0      | 0      | 0      | 0      |
| Bdellovibrio     | 2              | 87             | 1      | 1      | 1      | 0      | 0      | 1      | 0      | 0      | 0      | 0      | 0      | 0      | 1      | 0      | 0      | 0      | 1      | 0      |
| Beijerinckia     | 3              | 123            | 1      | 1      | 0      | 0      | 1      | 1      | 0      | 0      | 0      | 0      | 0      | 0      | 0      | 0      | 0      | 0      | 1      | 0      |
| Belliella        | 1              | 14             | 1      | 1      | 0      | 0      | 0      | 1      | 0      | 0      | 0      | 0      | 0      | 0      | 0      | 0      | 0      | 0      | 0      | 0      |
| Beutenbergia     | 2              | 82             | 1      | 1      | 0      | 0      | 0      | 0      | 0      | 0      | 0      | 0      | 0      | 0      | 0      | 0      | 0      | 0      | 0      | 0      |
| Bifidobacterium  | 2              | 61             | 1      | 1      | 1      | 0      | 0      | 1      | 0      | 0      | 0      | 0      | 0      | 0      | 0      | 0      | 0      | 0      | 0      | 0      |

| Genus                | Cluster Number | Protein Counts | K00074 | K00088 | K00100 | K00106 | K00114 | K00128 | K00129 | K00132 | K00141 | K00146 | K00148 | K00152 | K00155 | K00169 | K00217 | K00224 | K00274 | K00446 |
|----------------------|----------------|----------------|--------|--------|--------|--------|--------|--------|--------|--------|--------|--------|--------|--------|--------|--------|--------|--------|--------|--------|
| Bizionia             | 1              | 1              | 0      | 0      | 0      | 0      | 0      | 1      | 0      | 0      | 0      | 0      | 0      | 0      | 0      | 0      | 0      | 0      | 0      | 0      |
| Blastococcus         | 1              | 39             | 1      | 1      | 0      | 0      | 0      | 0      | 0      | 0      | 0      | 0      | 0      | 0      | 0      | 0      | 0      | 0      | 0      | 1      |
| Blattabacterium      | 1              | 23             | 0      | 1      | 0      | 0      | 0      | 0      | 0      | 0      | 0      | 0      | 0      | 0      | 0      | 0      | 0      | 0      | 0      | 0      |
| Blautia              | 1              | 22             | 0      | 0      | 0      | 0      | 0      | 0      | 0      | 0      | 0      | 0      | 0      | 0      | 0      | 0      | 0      | 0      | 0      | 0      |
| Bordetella           | 3              | 227            | 1      | 1      | 0      | 0      | 0      | 1      | 0      | 0      | 1      | 0      | 0      | 0      | 0      | 0      | 1      | 0      | 1      | 1      |
| Borrelia             | 1              | 32             | 0      | 1      | 0      | 0      | 0      | 0      | 0      | 0      | 0      | 0      | 0      | 0      | 0      | 0      | 0      | 0      | 0      | 0      |
| Brachybacterium      | 1              | 18             | 1      | 1      | 0      | 0      | 0      | 1      | 0      | 0      | 0      | 0      | 0      | 0      | 0      | 0      | 0      | 0      | 0      | 0      |
| Brachymonas          | 1              | 4              | 0      | 0      | 0      | 0      | 0      | 0      | 0      | 0      | 0      | 0      | 0      | 0      | 0      | 0      | 0      | 0      | 0      | 0      |
| Brachyspira          | 2              | 79             | 1      | 1      | 1      | 0      | 0      | 1      | 0      | 0      | 0      | 0      | 0      | 0      | 0      | 1      | 0      | 0      | 0      | 0      |
| Bradyrhizobiaceae    | 1              | 20             | 0      | 1      | 1      | 0      | 0      | 0      | 0      | 0      | 0      | 0      | 0      | 0      | 0      | 0      | 0      | 0      | 0      | 0      |
| Bradyrhizobium       | 3              | 254            | 1      | 1      | 1      | 0      | 1      | 1      | 0      | 0      | 1      | 0      | 0      | 0      | 1      | 0      | 1      | 0      | 1      | 1      |
| Brenneria            | 1              | 20             | 0      | 1      | 0      | 0      | 0      | 0      | 0      | 0      | 0      | 0      | 0      | 0      | 0      | 0      | 0      | 0      | 0      | 0      |
| Brevibacillus        | 2              | 122            | 1      | 1      | 1      | 0      | 0      | 1      | 0      | 0      | 0      | 0      | 0      | 0      | 0      | 0      | 0      | 0      | 1      | 0      |
| Brevibacterium       | 1              | 4              | 0      | 0      | 0      | 0      | 0      | 0      | 0      | 0      | 0      | 0      | 0      | 0      | 0      | 0      | 0      | 0      | 0      | 0      |
| Brevundimonas        | 2              | 105            | 1      | 1      | 0      | 0      | 0      | 1      | 0      | 0      | 0      | 1      | 0      | 0      | 0      | 0      | 0      | 0      | 1      | 0      |
| Brucella             | 3              | 138            | 1      | 1      | 1      | 0      | 0      | 1      | 0      | 0      | 0      | 0      | 0      | 0      | 1      | 0      | 0      | 0      | 0      | 1      |
| Buchnera             | 1              | 26             | 0      | 0      | 0      | 0      | 0      | 0      | 0      | 0      | 0      | 0      | 0      | 0      | 0      | 0      | 0      | 0      | 0      | 0      |
| Burkholderia         | 3              | 424            | 1      | 1      | 1      | 0      | 1      | 1      | 0      | 0      | 1      | 1      | 1      | 1      | 1      | 0      | 1      | 0      | 1      | 1      |
| Burkholderiaceae     | 3              | 143            | 1      | 1      | 1      | 0      | 1      | 1      | 0      | 0      | 0      | 0      | 0      | 0      | 0      | 0      | 1      | 1      | 0      | 0      |
| Burkholderiales      | 1              | 24             | 0      | 0      | 0      | 0      | 0      | 0      | 0      | 0      | 0      | 0      | 0      | 0      | 0      | 0      | 1      | 0      | 0      | 0      |
| Buttiauxella         | 1              | 2              | 0      | 0      | 0      | 0      | 0      | 0      | 0      | 0      | 0      | 0      | 0      | 0      | 0      | 0      | 0      | 0      | 0      | 0      |
| Butyrivibrio         | 2              | 67             | 1      | 1      | 0      | 0      | 0      | 1      | 0      | 0      | 0      | 0      | 0      | 0      | 0      | 0      | 0      | 0      | 0      | 0      |
| Caldanaerobacter     | 2              | 63             | 1      | 1      | 1      | 0      | 0      | 0      | 0      | 0      | 0      | 0      | 0      | 0      | 0      | 0      | 0      | 0      | 0      | 0      |
| Caldicellulosiruptor | 2              | 75             | 0      | 1      | 0      | 0      | 0      | 0      | 0      | 0      | 0      | 0      | 0      | 0      | 0      | 1      | 0      | 0      | 0      | 0      |
| Caldilinea           | 1              | 23             | 0      | 1      | 0      | 0      | 0      | 0      | 0      | 0      | 0      | 0      | 0      | 0      | 0      | 0      | 0      | 0      | 0      | 1      |
| Caldimonas           | 1              | 6              | 0      | 0      | 0      | 0      | 0      | 0      | 0      | 0      | 0      | 0      | 0      | 0      | 0      | 0      | 0      | 0      | 0      | 0      |
| Caldisericum         | 1              | 10             | 0      | 0      | 0      | 0      | 0      | 0      | 0      | 0      | 0      | 0      | 0      | 0      | 0      | 1      | 0      | 0      | 0      | 0      |
| Caldisphaera         | 1              | 7              | 0      | 1      | 0      | 0      | 0      | 0      | 0      | 0      | 0      | 0      | 0      | 0      | 0      | 1      | 0      | 0      | 0      | 0      |
| Calditerrivibrio     | 2              | 74             | 0      | 1      | 0      | 0      | 0      | 0      | 0      | 0      | 0      | 0      | 0      | 0      | 0      | 0      | 0      | 0      | 0      | 0      |
| Caldivirga           | 1              | 13             | 0      | 1      | 0      | 0      | 0      | 1      | 0      | 0      | 0      | 0      | 0      | 0      | 0      | 1      | 0      | 0      | 0      | 0      |
| Calothrix            | 1              | 43             | 0      | 1      | 0      | 0      | 0      | 1      | 0      | 0      | 0      | 0      | 0      | 0      | 0      | 0      | 0      | 0      | 1      | 0      |
| Calyptogena          | 2              | 34             | 0      | 1      | 0      | 0      | 0      | 0      | 0      | 0      | 0      | 0      | 0      | 0      | 0      | 0      | 0      | 0      | 0      | 0      |
| Campylobacter        | 2              | 80             | 0      | 1      | 1      | 0      | 0      | 0      | 0      | 0      | 0      | 0      | 0      | 0      | 0      | 0      | 0      | 1      | 0      | 0      |
| Candidatus           | 2              | 290            | 1      | 1      | 1      | 0      | 1      | 1      | 0      | 0      | 0      | 1      | 1      | 0      | 0      | 1      | 0      | 0      | 1      | 0      |
| Capnocytophaga       | 1              | 50             | 0      | 1      | 0      | 0      | 0      | 0      | 0      | 0      | 0      | 0      | 0      | 0      | 0      | 0      | 0      | 0      | 0      | 0      |
| Carbophilus          | 1              | 2              | 0      | 0      | 0      | 0      | 0      | 0      | 0      | 0      | 0      | 0      | 0      | 0      | 0      | 0      | 0      | 0      | 0      | 0      |
| Carboxydibrachium    | 1              | 14             | 0      | 1      | 0      | 0      | 0      | 0      | 0      | 0      | 0      | 0      | 0      | 0      | 0      | 0      | 0      | 0      | 0      | 0      |
| Carboxydotherrmus    | 2              | 68             | 1      | 1      | 1      | 0      | 0      | 0      | 0      | 0      | 0      | 0      | 0      | 0      | 0      | 0      | 0      | 0      | 0      | 0      |
| Carica               | 1              | 2              | 0      | 0      | 0      | 0      | 0      | 0      | 0      | 0      | 0      | 0      | 0      | 0      | 0      | 0      | 0      | 0      | 0      | 0      |
| Carnobacterium       | 2              | 71             | 1      | 1      | 0      | 0      | 0      | 1      | 0      | 0      | 0      | 0      | 0      | 0      | 0      | 0      | 0      | 0      | 0      | 0      |
| Catenibacterium      | 1              | 2              | 0      | 0      | 0      | 0      | 0      | 0      | 0      | 0      | 0      | 0      | 0      | 0      | 0      | 0      | 0      | 0      | 0      | 0      |
| Catenovulum          | 1              | 2              | 0      | 0      | 0      | 0      | 0      | 0      | 0      | 0      | 0      | 0      | 0      | 0      | 0      | 0      | 0      | 0      | 0      | 0      |
| Catenulispora        | 3              | 159            | 1      | 1      | 0      | 0      | 0      | 1      | 0      | 0      | 1      | 0      | 0      | 0      | 0      | 0      | 0      | 0      | 1      | 0      |
| Caulobacter          | 3              | 168            | 1      | 1      | 0      | 0      | 0      | 1      | 0      | 0      | 1      | 0      | 0      | 0      | 0      | 0      | 0      | 0      | 1      | 0      |
| Cedecea              | 1              | 45             | 0      | 1      | 0      | 0      | 0      | 0      | 0      | 0      | 0      | 0      | 0      | 0      | 0      | 0      | 0      | 0      | 0      | 0      |
| Cellulomonas         | 2              | 96             | 0      | 1      | 0      | 0      | 0      | 0      | 0      | 0      | 0      | 0      | 0      | 0      | 0      | 0      | 0      | 0      | 0      | 0      |
| Cellulophaga         | 2              | 105            | 1      | 1      | 0      | 0      | 0      | 1      | 0      | 0      | 0      | 0      | 0      | 0      | 0      | 0      | 0      | 0      | 1      | 0      |
| Cellulosilyticum     | 1              | 14             | 0      | 1      | 1      | 0      | 0      | 1      | 0      | 0      | 0      | 0      | 0      | 0      | 0      | 1      | 0      | 0      | 0      | 0      |
| Cellvibrio           | 2              | 85             | 0      | 1      | 0      | 0      | 0      | 0      | 0      | 0      | 0      | 0      | 0      | 0      | 0      | 0      | 0      | 0      | 0      | 0      |
| Cenarchaeum          | 1              | 7              | 0      | 1      | 0      | 0      | 0      | 0      | 0      | 0      | 0      | 0      | 0      | 0      | 0      | 0      | 0      | 0      | 0      | 0      |
| Chamaesiphon         | 1              | 13             | 0      | 1      | 0      | 0      | 0      | 0      | 0      | 0      | 0      | 0      | 0      | 0      | 0      | 0      | 0      | 0      | 1      | 0      |
| Chelativorans        | 3              | 136            | 1      | 1      | 0      | 0      | 0      | 1      | 0      | 0      | 0      | 0      | 0      | 0      | 1      | 0      | 0      | 0      | 0      | 1      |

| Genus                  | Cluster Number | Protein Counts | K00074 | K00088 | K00100 | K00106 | K00114 | K00128 | K00129 | K00132 | K00141 | K00146 | K00148 | K00152 | K00155 | K00169 | K00217 | K00224 | K00274 | K00446 |
|------------------------|----------------|----------------|--------|--------|--------|--------|--------|--------|--------|--------|--------|--------|--------|--------|--------|--------|--------|--------|--------|--------|
| Chelatococcus          | 1              | 2              | 0      | 0      | 0      | 0      | 0      | 0      | 0      | 0      | 0      | 0      | 0      | 0      | 0      | 0      | 0      | 0      | 0      | 0      |
| Chitinophaga           | 2              | 98             | 1      | 1      | 0      | 0      | 0      | 1      | 0      | 0      | 0      | 0      | 0      | 0      | 0      | 0      | 0      | 0      | 1      | 0      |
| Chlamydia              | 1              | 36             | 0      | 1      | 0      | 0      | 0      | 0      | 0      | 0      | 0      | 0      | 0      | 0      | 0      | 0      | 0      | 0      | 0      | 0      |
| Chlamydomonas          | 1              | 3              | 0      | 0      | 0      | 0      | 0      | 0      | 0      | 0      | 0      | 0      | 0      | 0      | 0      | 0      | 0      | 0      | 0      | 0      |
| Chlamydomphila         | 1              | 31             | 0      | 1      | 0      | 0      | 0      | 0      | 0      | 0      | 0      | 0      | 0      | 0      | 0      | 0      | 0      | 0      | 0      | 0      |
| Chlorobaculum          | 2              | 61             | 0      | 1      | 1      | 0      | 0      | 1      | 0      | 0      | 0      | 0      | 0      | 0      | 0      | 0      | 0      | 0      | 0      | 0      |
| Chlorobium             | 2              | 89             | 0      | 1      | 1      | 0      | 0      | 1      | 1      | 0      | 0      | 0      | 0      | 0      | 0      | 0      | 0      | 0      | 0      | 0      |
| Chlorobium/Pelodictyon | 1              | 2              | 0      | 0      | 0      | 0      | 0      | 0      | 0      | 0      | 0      | 0      | 0      | 0      | 0      | 0      | 0      | 0      | 0      | 0      |
| Chloroflexus           | 2              | 105            | 0      | 1      | 0      | 0      | 0      | 1      | 0      | 0      | 0      | 0      | 0      | 0      | 0      | 0      | 0      | 0      | 1      | 1      |
| Chlorogloeopsis        | 1              | 9              | 0      | 1      | 0      | 0      | 0      | 0      | 0      | 0      | 0      | 0      | 0      | 0      | 0      | 0      | 0      | 0      | 0      | 0      |
| Chloroherpeton         | 2              | 59             | 1      | 1      | 0      | 0      | 0      | 0      | 0      | 0      | 0      | 0      | 0      | 0      | 0      | 0      | 0      | 0      | 0      | 0      |
| Chromobacterium        | 2              | 117            | 1      | 1      | 0      | 0      | 0      | 1      | 0      | 0      | 0      | 0      | 0      | 0      | 0      | 0      | 0      | 0      | 0      | 0      |
| Chromohalobacter       | 2              | 145            | 0      | 1      | 0      | 0      | 0      | 1      | 0      | 0      | 0      | 0      | 1      | 0      | 0      | 0      | 0      | 0      | 0      | 0      |
| Chroococciopsis        | 1              | 24             | 0      | 1      | 0      | 0      | 0      | 1      | 0      | 0      | 0      | 0      | 0      | 0      | 0      | 0      | 0      | 0      | 1      | 0      |
| Chryseobacterium       | 2              | 104            | 1      | 0      | 0      | 0      | 1      | 1      | 0      | 0      | 0      | 1      | 0      | 0      | 0      | 0      | 0      | 0      | 0      | 0      |
| Citricella             | 1              | 13             | 0      | 0      | 0      | 0      | 0      | 0      | 0      | 0      | 0      | 0      | 0      | 0      | 0      | 0      | 0      | 0      | 0      | 1      |
| Citrobacter            | 2              | 190            | 1      | 1      | 0      | 0      | 0      | 0      | 0      | 0      | 0      | 0      | 0      | 0      | 0      | 0      | 0      | 0      | 0      | 0      |
| Clavibacter            | 2              | 83             | 1      | 1      | 0      | 0      | 0      | 0      | 0      | 0      | 0      | 0      | 0      | 0      | 0      | 0      | 0      | 0      | 0      | 0      |
| Clonorchis             | 1              | 1              | 0      | 0      | 0      | 0      | 0      | 0      | 0      | 0      | 0      | 0      | 0      | 0      | 0      | 0      | 0      | 0      | 0      | 0      |
| Clostridiales          | 2              | 77             | 1      | 1      | 0      | 0      | 0      | 0      | 0      | 0      | 0      | 0      | 0      | 0      | 0      | 1      | 0      | 0      | 0      | 0      |
| Clostridium            | 2              | 191            | 1      | 1      | 1      | 0      | 0      | 1      | 0      | 1      | 0      | 0      | 0      | 0      | 0      | 1      | 0      | 0      | 1      | 0      |
| Cohnella               | 1              | 2              | 0      | 0      | 0      | 0      | 0      | 0      | 0      | 0      | 0      | 0      | 0      | 0      | 0      | 0      | 0      | 0      | 0      | 0      |
| Coleofasciculus        | 1              | 4              | 0      | 0      | 0      | 0      | 0      | 0      | 0      | 0      | 0      | 0      | 0      | 0      | 0      | 0      | 0      | 0      | 0      | 0      |
| Collimonas             | 1              | 35             | 0      | 1      | 0      | 0      | 0      | 1      | 0      | 0      | 0      | 0      | 1      | 0      | 0      | 0      | 0      | 0      | 0      | 0      |
| Colwellia              | 2              | 130            | 0      | 1      | 0      | 0      | 1      | 1      | 0      | 0      | 0      | 0      | 1      | 0      | 1      | 0      | 0      | 0      | 0      | 0      |
| Comamonas              | 2              | 196            | 1      | 1      | 0      | 0      | 1      | 1      | 0      | 0      | 0      | 0      | 0      | 0      | 0      | 0      | 0      | 0      | 1      | 1      |
| Conexibacter           | 3              | 117            | 1      | 1      | 0      | 0      | 0      | 1      | 0      | 0      | 0      | 0      | 1      | 0      | 0      | 0      | 0      | 0      | 1      | 1      |
| Coprobacillus          | 1              | 2              | 0      | 0      | 0      | 0      | 0      | 0      | 0      | 0      | 0      | 0      | 0      | 0      | 0      | 0      | 0      | 0      | 0      | 0      |
| Coprococcus            | 2              | 76             | 1      | 1      | 0      | 0      | 0      | 0      | 0      | 0      | 0      | 0      | 0      | 0      | 0      | 1      | 0      | 0      | 0      | 0      |
| Coprothermobacter      | 2              | 45             | 0      | 1      | 1      | 0      | 0      | 0      | 0      | 0      | 0      | 0      | 0      | 0      | 0      | 1      | 0      | 0      | 0      | 0      |
| Coralimargarita        | 2              | 68             | 0      | 1      | 0      | 0      | 0      | 0      | 0      | 0      | 0      | 0      | 0      | 0      | 0      | 0      | 0      | 0      | 0      | 0      |
| Corallococcus          | 1              | 29             | 1      | 1      | 0      | 0      | 0      | 0      | 0      | 0      | 0      | 0      | 1      | 0      | 0      | 0      | 0      | 0      | 1      | 0      |
| Coriobacterium         | 2              | 36             | 1      | 1      | 1      | 0      | 0      | 0      | 0      | 0      | 0      | 0      | 0      | 0      | 0      | 0      | 0      | 0      | 0      | 0      |
| Corynebacterineae      | 1              | 5              | 0      | 0      | 0      | 0      | 0      | 0      | 0      | 0      | 0      | 0      | 0      | 0      | 0      | 0      | 0      | 0      | 0      | 0      |
| Corynebacterium        | 2              | 175            | 1      | 1      | 1      | 0      | 0      | 1      | 0      | 0      | 0      | 1      | 1      | 0      | 0      | 0      | 1      | 0      | 0      | 1      |
| Coxiella               | 2              | 54             | 0      | 1      | 0      | 0      | 0      | 0      | 0      | 0      | 0      | 0      | 0      | 0      | 0      | 0      | 0      | 0      | 0      | 0      |
| Crinalium              | 1              | 21             | 0      | 1      | 0      | 0      | 0      | 1      | 0      | 0      | 0      | 0      | 0      | 0      | 0      | 0      | 0      | 0      | 0      | 0      |
| Croceibacter           | 2              | 80             | 1      | 1      | 0      | 0      | 0      | 1      | 0      | 0      | 0      | 0      | 0      | 0      | 0      | 0      | 0      | 0      | 0      | 0      |
| Crocospaera            | 1              | 6              | 0      | 1      | 0      | 0      | 0      | 1      | 0      | 0      | 0      | 0      | 0      | 0      | 0      | 0      | 0      | 0      | 0      | 0      |
| Cronobacter            | 2              | 120            | 0      | 1      | 0      | 0      | 0      | 1      | 0      | 0      | 0      | 0      | 0      | 0      | 0      | 0      | 0      | 0      | 0      | 0      |
| Cryptobacterium        | 2              | 39             | 1      | 1      | 1      | 0      | 0      | 0      | 0      | 0      | 0      | 0      | 0      | 0      | 0      | 1      | 0      | 0      | 0      | 0      |
| Cucumis                | 1              | 9              | 0      | 0      | 0      | 0      | 0      | 0      | 0      | 0      | 0      | 0      | 0      | 0      | 0      | 0      | 0      | 0      | 0      | 0      |
| Cupriavidus            | 3              | 317            | 1      | 1      | 1      | 0      | 1      | 1      | 0      | 0      | 1      | 1      | 1      | 0      | 1      | 0      | 1      | 1      | 1      | 1      |
| Curtobacterium         | 1              | 5              | 0      | 0      | 0      | 0      | 0      | 0      | 0      | 0      | 0      | 0      | 0      | 0      | 0      | 0      | 0      | 0      | 0      | 0      |
| Curvibacter            | 1              | 27             | 0      | 1      | 0      | 0      | 0      | 1      | 0      | 0      | 0      | 0      | 0      | 0      | 0      | 0      | 0      | 0      | 0      | 0      |
| Cyanobacterium         | 1              | 9              | 0      | 1      | 0      | 0      | 0      | 0      | 0      | 0      | 0      | 0      | 0      | 0      | 0      | 0      | 0      | 0      | 1      | 0      |
| Cyanobium              | 1              | 10             | 0      | 1      | 0      | 0      | 0      | 0      | 0      | 0      | 0      | 0      | 0      | 0      | 0      | 0      | 0      | 0      | 1      | 0      |
| Cyanothece             | 1              | 34             | 0      | 1      | 0      | 0      | 0      | 1      | 0      | 0      | 0      | 0      | 0      | 0      | 0      | 0      | 0      | 0      | 1      | 0      |
| Cyclobacterium         | 1              | 19             | 1      | 1      | 0      | 0      | 0      | 1      | 0      | 0      | 0      | 0      | 0      | 0      | 0      | 0      | 0      | 0      | 0      | 0      |
| Cycloclasticus         | 1              | 21             | 0      | 1      | 0      | 0      | 1      | 0      | 0      | 0      | 0      | 0      | 0      | 0      | 0      | 0      | 0      | 0      | 0      | 0      |
| Cylindrospermopsis     | 1              | 4              | 0      | 0      | 0      | 0      | 0      | 0      | 0      | 0      | 0      | 0      | 0      | 0      | 0      | 0      | 0      | 0      | 0      | 0      |
| Cylindrospermum        | 1              | 30             | 1      | 1      | 0      | 0      | 0      | 0      | 0      | 0      | 0      | 0      | 0      | 0      | 0      | 0      | 0      | 0      | 0      | 0      |

| Genus              | Cluster Number | Protein Counts | K00074 | K00088 | K00100 | K00106 | K00114 | K00128 | K00129 | K00132 | K00141 | K00146 | K00148 | K00152 | K00155 | K00169 | K00217 | K00224 | K00274 | K00446 |
|--------------------|----------------|----------------|--------|--------|--------|--------|--------|--------|--------|--------|--------|--------|--------|--------|--------|--------|--------|--------|--------|--------|
| Cytophaga          | 2              | 69             | 1      | 1      | 1      | 0      | 0      | 1      | 0      | 0      | 0      | 0      | 0      | 0      | 0      | 0      | 0      | 0      | 0      | 0      |
| Dactylococcopsis   | 1              | 8              | 0      | 1      | 0      | 0      | 0      | 0      | 0      | 0      | 0      | 0      | 0      | 0      | 0      | 0      | 0      | 0      | 0      | 0      |
| Dechloromonas      | 1              | 40             | 1      | 1      | 0      | 0      | 1      | 1      | 0      | 0      | 0      | 0      | 0      | 0      | 0      | 0      | 0      | 0      | 0      | 1      |
| Dechlorosoma       | 1              | 19             | 1      | 1      | 1      | 0      | 0      | 1      | 0      | 0      | 0      | 0      | 0      | 0      | 0      | 0      | 0      | 0      | 0      | 0      |
| Deferribacter      | 2              | 73             | 1      | 1      | 0      | 0      | 0      | 0      | 0      | 0      | 0      | 0      | 0      | 0      | 0      | 0      | 0      | 0      | 0      | 0      |
| Dehalobacter       | 1              | 9              | 0      | 1      | 0      | 0      | 0      | 0      | 0      | 0      | 0      | 0      | 0      | 0      | 0      | 0      | 0      | 0      | 0      | 0      |
| Dehalococcoides    | 2              | 41             | 0      | 1      | 0      | 0      | 0      | 0      | 0      | 0      | 0      | 0      | 0      | 0      | 0      | 1      | 0      | 0      | 0      | 0      |
| Dehalogenimonas    | 1              | 37             | 0      | 1      | 0      | 0      | 0      | 0      | 0      | 0      | 0      | 0      | 0      | 0      | 0      | 1      | 0      | 0      | 0      | 0      |
| Deinococcus        | 2              | 140            | 1      | 1      | 0      | 0      | 0      | 1      | 0      | 0      | 0      | 0      | 0      | 0      | 0      | 0      | 0      | 0      | 1      | 1      |
| Delftia            | 3              | 177            | 1      | 1      | 0      | 0      | 1      | 1      | 0      | 0      | 0      | 1      | 0      | 0      | 0      | 0      | 0      | 0      | 0      | 1      |
| Denitrovibrio      | 2              | 67             | 0      | 1      | 0      | 0      | 0      | 0      | 0      | 0      | 0      | 0      | 0      | 0      | 0      | 0      | 0      | 0      | 0      | 0      |
| Desulfarculus      | 2              | 92             | 1      | 1      | 0      | 0      | 0      | 0      | 0      | 0      | 0      | 0      | 0      | 0      | 0      | 1      | 0      | 0      | 0      | 0      |
| Desulfatibacillum  | 3              | 84             | 1      | 1      | 0      | 0      | 0      | 0      | 0      | 0      | 0      | 0      | 0      | 0      | 0      | 0      | 0      | 0      | 1      | 0      |
| Desulfitobacterium | 2              | 102            | 1      | 1      | 0      | 0      | 0      | 1      | 0      | 1      | 0      | 0      | 0      | 0      | 0      | 1      | 0      | 0      | 0      | 0      |
| Desulfobacca       | 2              | 65             | 1      | 1      | 0      | 0      | 0      | 0      | 0      | 0      | 0      | 0      | 0      | 0      | 0      | 1      | 0      | 0      | 0      | 0      |
| Desulfobacterium   | 2              | 113            | 1      | 1      | 0      | 0      | 0      | 1      | 0      | 0      | 0      | 0      | 0      | 0      | 0      | 0      | 0      | 0      | 1      | 0      |
| Desulfobacula      | 1              | 21             | 1      | 1      | 0      | 0      | 0      | 0      | 0      | 0      | 0      | 0      | 0      | 0      | 0      | 1      | 0      | 0      | 1      | 0      |
| Desulfobulbus      | 2              | 88             | 1      | 1      | 1      | 0      | 0      | 0      | 0      | 0      | 0      | 0      | 0      | 0      | 0      | 0      | 0      | 0      | 0      | 0      |
| Desulfocapsa       | 1              | 9              | 0      | 1      | 0      | 0      | 0      | 0      | 0      | 0      | 0      | 0      | 0      | 0      | 0      | 0      | 0      | 0      | 0      | 0      |
| Desulfococcus      | 2              | 80             | 1      | 1      | 0      | 0      | 0      | 0      | 0      | 0      | 0      | 0      | 0      | 0      | 0      | 1      | 0      | 0      | 1      | 0      |
| Desulfohalobium    | 2              | 52             | 1      | 1      | 0      | 0      | 0      | 0      | 0      | 0      | 0      | 0      | 0      | 0      | 0      | 0      | 0      | 0      | 0      | 0      |
| Desulfomicrobium   | 2              | 65             | 0      | 1      | 0      | 0      | 0      | 0      | 0      | 0      | 0      | 0      | 0      | 0      | 0      | 0      | 0      | 0      | 0      | 0      |
| Desulfomonile      | 1              | 25             | 1      | 1      | 0      | 0      | 0      | 0      | 0      | 0      | 0      | 0      | 0      | 0      | 0      | 1      | 0      | 0      | 0      | 0      |
| Desulforhabdus     | 1              | 2              | 0      | 0      | 0      | 0      | 0      | 0      | 0      | 0      | 0      | 0      | 0      | 0      | 0      | 0      | 0      | 0      | 0      | 0      |
| Desulfosporosinus  | 1              | 30             | 1      | 1      | 0      | 0      | 0      | 0      | 0      | 0      | 0      | 0      | 0      | 0      | 0      | 1      | 0      | 0      | 0      | 0      |
| Desulfotalea       | 2              | 66             | 0      | 1      | 1      | 0      | 0      | 1      | 0      | 0      | 0      | 0      | 0      | 0      | 0      | 1      | 0      | 0      | 0      | 0      |
| Desulfotomaculum   | 2              | 98             | 1      | 1      | 0      | 0      | 0      | 0      | 0      | 1      | 0      | 0      | 0      | 0      | 0      | 0      | 0      | 0      | 0      | 0      |
| Desulfovibrio      | 2              | 144            | 0      | 1      | 1      | 0      | 0      | 1      | 0      | 0      | 0      | 0      | 0      | 0      | 1      | 0      | 0      | 0      | 0      | 0      |
| Desulfurispirillum | 2              | 78             | 1      | 1      | 1      | 0      | 0      | 0      | 0      | 0      | 0      | 0      | 0      | 0      | 0      | 1      | 0      | 0      | 0      | 0      |
| Desulfurivibrio    | 2              | 71             | 0      | 1      | 1      | 0      | 0      | 0      | 0      | 0      | 0      | 0      | 0      | 0      | 0      | 0      | 0      | 0      | 0      | 0      |
| Desulfurobacterium | 2              | 53             | 0      | 1      | 0      | 0      | 0      | 0      | 0      | 0      | 0      | 0      | 0      | 0      | 0      | 1      | 0      | 0      | 0      | 0      |
| Desulfurococcus    | 1              | 11             | 0      | 0      | 0      | 0      | 0      | 0      | 0      | 0      | 0      | 0      | 0      | 0      | 0      | 1      | 0      | 0      | 0      | 0      |
| Diaphorobacter     | 1              | 16             | 0      | 0      | 0      | 0      | 0      | 0      | 0      | 0      | 0      | 0      | 0      | 0      | 0      | 0      | 0      | 0      | 0      | 1      |
| Dichelobacter      | 2              | 45             | 0      | 1      | 0      | 0      | 0      | 0      | 0      | 0      | 0      | 0      | 0      | 0      | 0      | 0      | 0      | 0      | 0      | 0      |
| Dickeya            | 2              | 155            | 0      | 1      | 1      | 0      | 0      | 0      | 0      | 0      | 0      | 0      | 0      | 0      | 0      | 0      | 0      | 0      | 0      | 0      |
| Dictyoglomus       | 2              | 62             | 0      | 1      | 1      | 0      | 0      | 0      | 0      | 0      | 0      | 0      | 0      | 0      | 0      | 1      | 0      | 0      | 0      | 0      |
| Dinoroseobacter    | 3              | 148            | 1      | 1      | 0      | 0      | 1      | 1      | 0      | 0      | 0      | 0      | 0      | 0      | 0      | 0      | 0      | 0      | 0      | 0      |
| Dokdonia           | 1              | 3              | 0      | 0      | 0      | 0      | 0      | 0      | 0      | 0      | 0      | 0      | 0      | 0      | 0      | 0      | 0      | 0      | 0      | 0      |
| Dorea              | 1              | 7              | 0      | 0      | 0      | 0      | 0      | 0      | 0      | 0      | 0      | 0      | 0      | 0      | 0      | 0      | 0      | 0      | 0      | 0      |
| Dyadobacter        | 2              | 83             | 1      | 1      | 0      | 0      | 0      | 1      | 0      | 0      | 0      | 0      | 1      | 0      | 0      | 0      | 0      | 0      | 1      | 0      |
| Echinicola         | 1              | 20             | 1      | 1      | 0      | 0      | 0      | 1      | 0      | 0      | 0      | 0      | 0      | 0      | 0      | 0      | 0      | 0      | 0      | 0      |
| Edwardsiella       | 2              | 126            | 0      | 1      | 0      | 0      | 0      | 0      | 0      | 0      | 0      | 0      | 0      | 0      | 0      | 0      | 0      | 0      | 0      | 0      |
| Eggerthella        | 1              | 51             | 0      | 1      | 1      | 0      | 0      | 1      | 0      | 0      | 0      | 0      | 0      | 0      | 0      | 1      | 0      | 0      | 0      | 0      |
| Ehrlichia          | 2              | 37             | 0      | 1      | 1      | 0      | 0      | 0      | 0      | 0      | 0      | 0      | 0      | 0      | 0      | 0      | 0      | 0      | 0      | 0      |
| Eikenella          | 1              | 4              | 0      | 0      | 0      | 0      | 0      | 0      | 0      | 0      | 0      | 0      | 0      | 0      | 0      | 0      | 0      | 0      | 0      | 0      |
| Elusimicrobium     | 2              | 44             | 0      | 1      | 1      | 0      | 0      | 0      | 0      | 0      | 0      | 0      | 0      | 0      | 0      | 0      | 0      | 0      | 0      | 0      |
| Emticicia          | 1              | 21             | 0      | 1      | 0      | 0      | 0      | 1      | 0      | 0      | 0      | 0      | 0      | 0      | 0      | 0      | 0      | 0      | 1      | 0      |
| Enhydrobacter      | 1              | 1              | 0      | 0      | 0      | 0      | 0      | 0      | 0      | 0      | 0      | 0      | 0      | 0      | 0      | 0      | 0      | 0      | 0      | 0      |
| Ensifer            | 1              | 2              | 0      | 0      | 0      | 0      | 0      | 0      | 0      | 0      | 0      | 0      | 0      | 0      | 0      | 0      | 0      | 0      | 0      | 0      |
| Enterobacter       | 2              | 202            | 1      | 1      | 0      | 0      | 0      | 1      | 0      | 0      | 0      | 1      | 0      | 0      | 0      | 0      | 0      | 0      | 0      | 0      |
| Enterobacteriaceae | 2              | 211            | 1      | 1      | 1      | 0      | 0      | 1      | 0      | 0      | 0      | 1      | 0      | 0      | 0      | 0      | 0      | 0      | 0      | 0      |
| Enterococcus       | 1              | 187            | 0      | 1      | 1      | 0      | 0      | 1      | 0      | 0      | 0      | 1      | 0      | 0      | 0      | 0      | 0      | 0      | 0      | 0      |

| Genus               | Cluster Number | Protein Counts | K00074 | K00088 | K00100 | K00106 | K00114 | K00128 | K00129 | K00132 | K00141 | K00146 | K00148 | K00152 | K00155 | K00169 | K00217 | K00224 | K00274 | K00446 |
|---------------------|----------------|----------------|--------|--------|--------|--------|--------|--------|--------|--------|--------|--------|--------|--------|--------|--------|--------|--------|--------|--------|
| Enterovibrio        | 1              | 15             | 0      | 1      | 0      | 0      | 0      | 0      | 0      | 0      | 0      | 0      | 0      | 0      | 0      | 0      | 0      | 0      | 0      | 0      |
| Erwinia             | 2              | 151            | 0      | 1      | 0      | 0      | 0      | 1      | 0      | 0      | 0      | 0      | 0      | 0      | 0      | 0      | 0      | 0      | 0      | 0      |
| Erysipelothrix      | 1              | 9              | 0      | 1      | 0      | 0      | 0      | 1      | 0      | 0      | 0      | 0      | 0      | 0      | 0      | 0      | 0      | 0      | 0      | 0      |
| Erysipelotrichaceae | 1              | 4              | 0      | 0      | 0      | 0      | 0      | 0      | 0      | 0      | 0      | 0      | 0      | 0      | 0      | 0      | 0      | 0      | 0      | 0      |
| Erythrobacter       | 2              | 80             | 1      | 1      | 0      | 0      | 1      | 0      | 0      | 0      | 0      | 0      | 0      | 0      | 0      | 0      | 0      | 0      | 0      | 0      |
| Escherichia         | 2              | 242            | 1      | 1      | 1      | 0      | 0      | 0      | 0      | 0      | 0      | 1      | 0      | 0      | 0      | 0      | 0      | 0      | 0      | 0      |
| Ethanoligenens      | 2              | 69             | 1      | 1      | 0      | 0      | 0      | 0      | 0      | 0      | 0      | 0      | 0      | 0      | 0      | 0      | 0      | 0      | 0      | 0      |
| Eubacteriaceae      | 1              | 2              | 0      | 0      | 0      | 0      | 0      | 0      | 0      | 0      | 0      | 0      | 0      | 0      | 0      | 0      | 0      | 0      | 0      | 0      |
| Eubacterium         | 2              | 103            | 1      | 1      | 1      | 0      | 0      | 1      | 0      | 0      | 0      | 0      | 0      | 0      | 0      | 1      | 0      | 0      | 0      | 0      |
| Eudoraea            | 1              | 4              | 0      | 0      | 0      | 0      | 0      | 0      | 0      | 0      | 0      | 0      | 0      | 0      | 0      | 0      | 0      | 0      | 0      | 0      |
| Euryarchaeota       | 1              | 1              | 0      | 0      | 0      | 0      | 0      | 0      | 0      | 0      | 0      | 0      | 0      | 0      | 0      | 0      | 0      | 0      | 0      | 0      |
| Exiguobacterium     | 2              | 93             | 1      | 1      | 1      | 0      | 0      | 1      | 0      | 0      | 0      | 0      | 0      | 0      | 0      | 0      | 0      | 0      | 1      | 0      |
| Faecalibacterium    | 1              | 12             | 1      | 1      | 0      | 0      | 0      | 0      | 0      | 0      | 0      | 0      | 0      | 0      | 0      | 0      | 0      | 0      | 0      | 0      |
| Ferrimonas          | 2              | 115            | 0      | 1      | 0      | 0      | 0      | 1      | 0      | 0      | 0      | 0      | 0      | 0      | 0      | 0      | 0      | 0      | 0      | 0      |
| Ferroglobus         | 1              | 14             | 1      | 1      | 0      | 0      | 0      | 0      | 0      | 0      | 0      | 0      | 0      | 0      | 0      | 1      | 0      | 0      | 0      | 0      |
| Ferroplasma         | 1              | 11             | 1      | 1      | 0      | 0      | 0      | 0      | 0      | 0      | 0      | 0      | 0      | 0      | 0      | 0      | 0      | 0      | 0      | 0      |
| Fervidicoccus       | 1              | 7              | 0      | 0      | 0      | 0      | 0      | 0      | 0      | 0      | 0      | 0      | 0      | 0      | 0      | 1      | 0      | 0      | 0      | 0      |
| Fervidobacterium    | 2              | 54             | 0      | 1      | 1      | 0      | 0      | 0      | 0      | 0      | 0      | 0      | 0      | 0      | 0      | 1      | 0      | 0      | 0      | 0      |
| Fibrella            | 1              | 17             | 0      | 1      | 0      | 0      | 0      | 1      | 0      | 0      | 0      | 0      | 0      | 0      | 0      | 0      | 0      | 0      | 1      | 0      |
| Fibrobacter         | 2              | 52             | 0      | 1      | 1      | 0      | 0      | 1      | 0      | 0      | 0      | 0      | 0      | 0      | 0      | 0      | 0      | 0      | 0      | 0      |
| Filifactor          | 1              | 9              | 1      | 1      | 0      | 0      | 0      | 0      | 0      | 0      | 0      | 0      | 0      | 0      | 0      | 0      | 0      | 0      | 0      | 0      |
| Finegoldia          | 2              | 55             | 0      | 1      | 0      | 0      | 0      | 1      | 0      | 0      | 0      | 0      | 0      | 0      | 0      | 1      | 0      | 0      | 0      | 0      |
| Firmicutes          | 1              | 15             | 0      | 1      | 0      | 0      | 0      | 0      | 0      | 0      | 0      | 0      | 0      | 0      | 0      | 0      | 0      | 0      | 0      | 0      |
| Fischerella         | 1              | 15             | 0      | 1      | 0      | 0      | 0      | 0      | 0      | 0      | 0      | 0      | 0      | 0      | 0      | 0      | 0      | 0      | 0      | 0      |
| Flavobacteria       | 1              | 7              | 1      | 0      | 0      | 0      | 0      | 1      | 0      | 0      | 0      | 0      | 0      | 0      | 0      | 0      | 0      | 0      | 0      | 0      |
| Flavobacteriaceae   | 2              | 69             | 1      | 1      | 0      | 0      | 0      | 1      | 0      | 0      | 0      | 0      | 0      | 0      | 0      | 0      | 0      | 0      | 0      | 0      |
| Flavobacteriales    | 1              | 3              | 0      | 0      | 0      | 0      | 0      | 1      | 0      | 0      | 0      | 0      | 0      | 0      | 0      | 0      | 0      | 0      | 0      | 0      |
| Flavobacterium      | 2              | 103            | 1      | 1      | 0      | 0      | 0      | 1      | 0      | 0      | 0      | 0      | 0      | 0      | 0      | 0      | 0      | 0      | 1      | 0      |
| Flexibacter         | 1              | 17             | 1      | 1      | 0      | 0      | 0      | 1      | 0      | 0      | 0      | 0      | 0      | 0      | 0      | 0      | 0      | 0      | 0      | 0      |
| Flexistipes         | 1              | 11             | 0      | 1      | 0      | 0      | 0      | 0      | 0      | 0      | 0      | 0      | 0      | 0      | 0      | 0      | 0      | 1      | 0      | 0      |
| Fluoribacter        | 1              | 6              | 0      | 1      | 0      | 0      | 0      | 0      | 0      | 0      | 0      | 0      | 0      | 0      | 0      | 0      | 0      | 0      | 0      | 0      |
| Fluviicola          | 2              | 69             | 1      | 1      | 0      | 0      | 0      | 1      | 0      | 0      | 0      | 0      | 0      | 0      | 0      | 0      | 0      | 0      | 0      | 0      |
| Formosa             | 1              | 2              | 0      | 0      | 0      | 0      | 0      | 0      | 0      | 0      | 0      | 0      | 0      | 0      | 0      | 0      | 0      | 0      | 0      | 0      |
| Francisella         | 2              | 88             | 0      | 1      | 1      | 0      | 0      | 1      | 0      | 0      | 0      | 0      | 0      | 0      | 0      | 0      | 0      | 0      | 0      | 0      |
| Frankia             | 3              | 202            | 1      | 1      | 1      | 0      | 0      | 1      | 0      | 0      | 0      | 0      | 1      | 0      | 0      | 0      | 0      | 0      | 0      | 0      |
| Frateuria           | 1              | 25             | 0      | 1      | 0      | 0      | 0      | 1      | 1      | 0      | 0      | 0      | 0      | 0      | 0      | 0      | 0      | 0      | 0      | 0      |
| Fructobacillus      | 1              | 2              | 0      | 0      | 0      | 0      | 0      | 0      | 0      | 0      | 0      | 0      | 0      | 0      | 0      | 0      | 0      | 0      | 0      | 0      |
| Fulvimarina         | 1              | 2              | 0      | 0      | 0      | 0      | 0      | 0      | 0      | 0      | 0      | 0      | 0      | 0      | 0      | 0      | 0      | 0      | 0      | 0      |
| Fusobacterium       | 1              | 48             | 1      | 1      | 1      | 0      | 0      | 0      | 0      | 0      | 0      | 0      | 0      | 0      | 0      | 0      | 0      | 0      | 0      | 0      |
| Gallibacterium      | 2              | 87             | 0      | 1      | 0      | 0      | 0      | 1      | 0      | 0      | 0      | 0      | 0      | 0      | 0      | 0      | 0      | 0      | 0      | 0      |
| Gallionella         | 2              | 67             | 0      | 1      | 0      | 0      | 0      | 0      | 0      | 0      | 0      | 0      | 0      | 0      | 0      | 1      | 0      | 0      | 0      | 0      |
| Gammaproteobacteria | 1              | 9              | 0      | 0      | 0      | 0      | 0      | 0      | 0      | 0      | 0      | 0      | 0      | 0      | 0      | 0      | 0      | 0      | 0      | 0      |
| Gardnerella         | 1              | 31             | 0      | 1      | 0      | 0      | 0      | 0      | 0      | 0      | 0      | 0      | 0      | 0      | 0      | 0      | 0      | 0      | 0      | 0      |
| Geitlerinema        | 1              | 9              | 0      | 1      | 0      | 0      | 0      | 0      | 0      | 0      | 0      | 0      | 0      | 0      | 0      | 0      | 0      | 0      | 1      | 0      |
| Gemmatimonas        | 2              | 93             | 1      | 1      | 0      | 0      | 0      | 1      | 0      | 0      | 0      | 0      | 0      | 0      | 0      | 0      | 0      | 0      | 0      | 0      |
| Geobacillus         | 2              | 168            | 1      | 1      | 1      | 0      | 0      | 1      | 0      | 0      | 0      | 1      | 0      | 0      | 0      | 1      | 0      | 0      | 1      | 1      |
| Geobacter           | 2              | 150            | 1      | 1      | 1      | 0      | 0      | 1      | 0      | 0      | 0      | 0      | 0      | 0      | 1      | 0      | 0      | 0      | 0      | 0      |
| Geodermatophilus    | 2              | 136            | 1      | 1      | 0      | 0      | 0      | 1      | 0      | 0      | 0      | 1      | 0      | 1      | 0      | 0      | 0      | 0      | 0      | 0      |
| Geopsychrobacter    | 1              | 2              | 0      | 0      | 0      | 0      | 0      | 0      | 0      | 0      | 0      | 0      | 0      | 0      | 0      | 0      | 0      | 0      | 0      | 0      |
| Gillisia            | 1              | 11             | 0      | 0      | 0      | 0      | 0      | 0      | 0      | 0      | 0      | 0      | 0      | 0      | 0      | 0      | 0      | 0      | 0      | 0      |
| Gilvimarinus        | 1              | 4              | 0      | 0      | 0      | 0      | 0      | 0      | 0      | 0      | 0      | 0      | 0      | 0      | 0      | 0      | 0      | 0      | 0      | 0      |
| Glaciecola          | 2              | 117            | 1      | 1      | 0      | 0      | 0      | 1      | 1      | 0      | 0      | 0      | 0      | 0      | 0      | 0      | 0      | 0      | 1      | 0      |

| Genus             | Cluster Number | Protein Counts | K00074 | K00088 | K00100 | K00106 | K00114 | K00128 | K00129 | K00132 | K00141 | K00146 | K00148 | K00152 | K00155 | K00169 | K00217 | K00224 | K00274 | K00446 |
|-------------------|----------------|----------------|--------|--------|--------|--------|--------|--------|--------|--------|--------|--------|--------|--------|--------|--------|--------|--------|--------|--------|
| Gloeobacter       | 2              | 67             | 0      | 1      | 0      | 0      | 0      | 1      | 0      | 0      | 0      | 0      | 0      | 0      | 0      | 0      | 0      | 0      | 0      | 0      |
| Gloeocapsa        | 1              | 20             | 0      | 1      | 0      | 0      | 0      | 0      | 0      | 0      | 0      | 0      | 0      | 0      | 0      | 0      | 0      | 0      | 1      | 0      |
| Gloeotheca        | 1              | 1              | 0      | 0      | 0      | 0      | 0      | 0      | 0      | 0      | 0      | 0      | 0      | 0      | 0      | 0      | 0      | 0      | 0      | 0      |
| Gluconacetobacter | 2              | 96             | 0      | 1      | 0      | 0      | 1      | 1      | 0      | 0      | 0      | 0      | 0      | 0      | 0      | 0      | 0      | 0      | 1      | 0      |
| Gluconobacter     | 2              | 76             | 0      | 1      | 1      | 0      | 1      | 1      | 0      | 0      | 0      | 0      | 1      | 0      | 0      | 0      | 0      | 0      | 0      | 0      |
| Gordonia          | 1              | 158            | 1      | 1      | 0      | 0      | 0      | 1      | 0      | 0      | 1      | 0      | 0      | 0      | 0      | 0      | 0      | 0      | 1      | 1      |
| Gordonibacter     | 1              | 32             | 0      | 0      | 0      | 0      | 0      | 0      | 0      | 0      | 0      | 0      | 0      | 0      | 0      | 1      | 0      | 0      | 0      | 0      |
| Gramella          | 2              | 104            | 1      | 1      | 1      | 0      | 0      | 1      | 0      | 0      | 0      | 0      | 0      | 0      | 1      | 0      | 0      | 0      | 1      | 0      |
| Granulibacter     | 2              | 90             | 1      | 1      | 0      | 0      | 1      | 1      | 0      | 0      | 0      | 0      | 0      | 0      | 0      | 0      | 0      | 0      | 0      | 0      |
| Granulicella      | 2              | 98             | 1      | 1      | 0      | 0      | 0      | 1      | 0      | 0      | 1      | 0      | 1      | 0      | 0      | 0      | 0      | 0      | 1      | 0      |
| Grimontia         | 1              | 9              | 0      | 0      | 0      | 0      | 0      | 0      | 0      | 0      | 0      | 0      | 0      | 0      | 0      | 0      | 0      | 0      | 0      | 0      |
| Haemophilus       | 2              | 117            | 0      | 1      | 1      | 0      | 0      | 0      | 0      | 0      | 0      | 0      | 0      | 0      | 0      | 0      | 0      | 0      | 0      | 0      |
| Hafnia            | 1              | 29             | 0      | 1      | 0      | 0      | 0      | 0      | 0      | 0      | 0      | 0      | 0      | 0      | 0      | 0      | 0      | 0      | 0      | 0      |
| Hahella           | 3              | 130            | 1      | 1      | 1      | 0      | 0      | 1      | 0      | 0      | 0      | 0      | 0      | 0      | 1      | 0      | 0      | 0      | 0      | 0      |
| Halalkalicoccus   | 1              | 18             | 1      | 1      | 0      | 0      | 0      | 1      | 0      | 0      | 0      | 0      | 0      | 0      | 0      | 0      | 0      | 0      | 0      | 0      |
| Halanaerobium     | 2              | 89             | 1      | 1      | 1      | 0      | 0      | 0      | 0      | 0      | 0      | 0      | 0      | 0      | 0      | 1      | 0      | 0      | 0      | 0      |
| Haliangium        | 2              | 108            | 1      | 1      | 0      | 0      | 0      | 0      | 0      | 0      | 0      | 0      | 0      | 0      | 0      | 0      | 0      | 0      | 1      | 0      |
| Haliscomenobacter | 2              | 107            | 1      | 1      | 0      | 0      | 0      | 1      | 0      | 0      | 0      | 0      | 0      | 0      | 0      | 0      | 0      | 0      | 1      | 0      |
| Haloarcula        | 1              | 22             | 1      | 1      | 1      | 0      | 0      | 1      | 0      | 0      | 0      | 0      | 1      | 0      | 1      | 0      | 0      | 0      | 0      | 0      |
| Halobacillus      | 1              | 19             | 1      | 1      | 0      | 0      | 0      | 1      | 0      | 0      | 0      | 0      | 0      | 0      | 0      | 0      | 0      | 0      | 0      | 0      |
| Halobacteriaceae  | 1              | 1              | 0      | 0      | 0      | 0      | 0      | 0      | 0      | 0      | 0      | 0      | 0      | 0      | 0      | 0      | 0      | 0      | 0      | 0      |
| Halobacterium     | 1              | 10             | 1      | 1      | 0      | 0      | 0      | 1      | 0      | 0      | 0      | 0      | 0      | 0      | 0      | 0      | 0      | 0      | 0      | 0      |
| Halobacteroides   | 1              | 14             | 0      | 1      | 0      | 0      | 0      | 0      | 0      | 0      | 0      | 0      | 0      | 0      | 0      | 1      | 0      | 0      | 0      | 0      |
| Haloferax         | 1              | 20             | 1      | 1      | 0      | 0      | 0      | 1      | 0      | 0      | 0      | 0      | 0      | 0      | 0      | 0      | 0      | 0      | 0      | 0      |
| Halogeometricum   | 1              | 12             | 1      | 1      | 0      | 0      | 0      | 1      | 0      | 0      | 0      | 0      | 0      | 0      | 0      | 0      | 0      | 0      | 0      | 0      |
| Halomicrobium     | 1              | 10             | 1      | 1      | 0      | 0      | 0      | 1      | 0      | 0      | 0      | 0      | 0      | 0      | 0      | 0      | 0      | 0      | 0      | 0      |
| Halomonas         | 1              | 149            | 1      | 1      | 0      | 0      | 0      | 1      | 0      | 0      | 0      | 0      | 1      | 0      | 0      | 0      | 0      | 0      | 0      | 0      |
| Halopiger         | 1              | 16             | 1      | 1      | 0      | 0      | 0      | 1      | 0      | 0      | 0      | 0      | 1      | 0      | 0      | 0      | 0      | 0      | 0      | 0      |
| Haloquadratum     | 1              | 19             | 1      | 1      | 1      | 0      | 0      | 1      | 0      | 0      | 0      | 0      | 1      | 0      | 0      | 0      | 0      | 0      | 0      | 0      |
| Halorhabdus       | 1              | 10             | 1      | 1      | 0      | 0      | 0      | 0      | 0      | 0      | 0      | 0      | 0      | 0      | 0      | 1      | 0      | 0      | 0      | 0      |
| Halorhodospira    | 2              | 71             | 0      | 1      | 0      | 0      | 0      | 0      | 0      | 0      | 0      | 0      | 0      | 0      | 0      | 0      | 0      | 0      | 0      | 0      |
| Halorubrum        | 1              | 16             | 1      | 1      | 0      | 0      | 0      | 1      | 0      | 0      | 0      | 0      | 0      | 0      | 0      | 0      | 0      | 0      | 0      | 0      |
| Haloterrigena     | 1              | 19             | 1      | 1      | 0      | 0      | 0      | 1      | 0      | 0      | 0      | 0      | 0      | 0      | 0      | 0      | 0      | 0      | 0      | 0      |
| Halothece         | 1              | 9              | 0      | 1      | 0      | 0      | 0      | 0      | 0      | 0      | 0      | 0      | 0      | 0      | 0      | 0      | 0      | 0      | 0      | 0      |
| Halothermothrix   | 2              | 50             | 0      | 1      | 1      | 0      | 0      | 0      | 0      | 0      | 0      | 0      | 0      | 0      | 0      | 1      | 0      | 0      | 0      | 0      |
| Halothiobacillus  | 2              | 65             | 0      | 1      | 0      | 0      | 0      | 0      | 0      | 0      | 0      | 0      | 0      | 0      | 0      | 0      | 0      | 0      | 0      | 0      |
| Halovivax         | 1              | 12             | 1      | 1      | 0      | 0      | 0      | 0      | 0      | 0      | 0      | 0      | 1      | 0      | 0      | 0      | 0      | 0      | 0      | 0      |
| Helicobacter      | 2              | 79             | 0      | 1      | 0      | 0      | 0      | 0      | 0      | 0      | 0      | 0      | 0      | 0      | 0      | 1      | 0      | 0      | 0      | 0      |
| Heliobacillus     | 1              | 4              | 0      | 1      | 0      | 0      | 0      | 0      | 0      | 0      | 0      | 0      | 0      | 0      | 0      | 0      | 0      | 0      | 0      | 0      |
| Heliobacterium    | 2              | 51             | 1      | 1      | 0      | 0      | 0      | 0      | 0      | 0      | 0      | 0      | 0      | 0      | 0      | 0      | 0      | 0      | 0      | 0      |
| Herbaspirillum    | 2              | 172            | 1      | 1      | 0      | 0      | 0      | 1      | 0      | 0      | 1      | 0      | 0      | 0      | 0      | 0      | 0      | 0      | 0      | 0      |
| Herminiimonas     | 3              | 89             | 0      | 1      | 1      | 0      | 0      | 0      | 0      | 0      | 0      | 0      | 1      | 0      | 0      | 0      | 0      | 0      | 0      | 0      |
| Herpetosiphon     | 3              | 90             | 1      | 1      | 0      | 0      | 0      | 1      | 0      | 0      | 0      | 0      | 0      | 0      | 0      | 0      | 0      | 0      | 0      | 0      |
| Hippea            | 2              | 44             | 0      | 1      | 0      | 0      | 0      | 0      | 0      | 0      | 0      | 0      | 0      | 0      | 0      | 1      | 0      | 0      | 0      | 0      |
| Hirschia          | 2              | 102            | 1      | 1      | 0      | 0      | 0      | 1      | 0      | 0      | 0      | 0      | 0      | 0      | 0      | 0      | 0      | 0      | 0      | 0      |
| Histophilus       | 2              | 72             | 0      | 1      | 1      | 0      | 0      | 0      | 0      | 0      | 0      | 0      | 0      | 0      | 0      | 0      | 0      | 0      | 0      | 0      |
| Hoeflea           | 1              | 16             | 0      | 1      | 1      | 0      | 0      | 0      | 0      | 0      | 0      | 0      | 0      | 0      | 0      | 0      | 0      | 0      | 0      | 0      |
| Hydrogenivirga    | 1              | 2              | 0      | 0      | 0      | 0      | 0      | 0      | 0      | 0      | 0      | 0      | 0      | 0      | 0      | 0      | 0      | 0      | 0      | 0      |
| Hydrogenobacter   | 2              | 55             | 0      | 1      | 0      | 0      | 1      | 0      | 0      | 0      | 0      | 0      | 0      | 0      | 0      | 1      | 0      | 0      | 0      | 0      |
| Hydrogenobaculum  | 2              | 44             | 0      | 1      | 0      | 0      | 0      | 0      | 0      | 0      | 0      | 0      | 0      | 0      | 0      | 1      | 0      | 0      | 0      | 0      |
| Hydrogenophaga    | 1              | 9              | 0      | 0      | 0      | 0      | 0      | 0      | 0      | 0      | 0      | 0      | 0      | 0      | 0      | 0      | 0      | 0      | 0      | 1      |
| Hylemonella       | 1              | 4              | 0      | 0      | 0      | 0      | 0      | 0      | 0      | 0      | 0      | 0      | 0      | 0      | 0      | 0      | 0      | 0      | 0      | 0      |

| Genus                 | Cluster Number | Protein Counts | K00074 | K00088 | K00100 | K00106 | K00114 | K00128 | K00129 | K00132 | K00141 | K00146 | K00148 | K00152 | K00155 | K00169 | K00217 | K00224 | K00274 | K00446 |
|-----------------------|----------------|----------------|--------|--------|--------|--------|--------|--------|--------|--------|--------|--------|--------|--------|--------|--------|--------|--------|--------|--------|
| Hyperthermus          | 1              | 6              | 0      | 0      | 0      | 0      | 0      | 0      | 0      | 0      | 0      | 0      | 0      | 0      | 0      | 1      | 0      | 0      | 0      | 0      |
| Hyphomicrobium        | 2              | 93             | 1      | 1      | 0      | 0      | 1      | 1      | 0      | 0      | 0      | 0      | 0      | 0      | 0      | 0      | 0      | 0      | 1      | 0      |
| Hyphomonas            | 3              | 105            | 1      | 1      | 1      | 0      | 1      | 1      | 0      | 0      | 0      | 0      | 0      | 0      | 0      | 0      | 0      | 0      | 0      | 0      |
| Ideonella             | 1              | 18             | 0      | 0      | 0      | 0      | 0      | 0      | 0      | 0      | 0      | 0      | 0      | 0      | 0      | 0      | 0      | 0      | 0      | 0      |
| Idiomarina            | 2              | 86             | 0      | 1      | 0      | 0      | 0      | 1      | 0      | 0      | 0      | 0      | 0      | 0      | 0      | 0      | 0      | 0      | 0      | 0      |
| Ignavibacterium       | 1              | 14             | 1      | 1      | 0      | 0      | 0      | 0      | 0      | 0      | 0      | 0      | 0      | 0      | 0      | 0      | 0      | 0      | 0      | 0      |
| Ignicoccus            | 1              | 5              | 0      | 0      | 0      | 0      | 0      | 0      | 0      | 0      | 0      | 0      | 0      | 0      | 0      | 1      | 0      | 0      | 0      | 0      |
| Ignisphaera           | 1              | 8              | 0      | 1      | 0      | 0      | 0      | 0      | 0      | 0      | 0      | 0      | 0      | 0      | 0      | 1      | 0      | 0      | 0      | 0      |
| Ilyobacter            | 2              | 85             | 1      | 1      | 1      | 0      | 0      | 0      | 0      | 0      | 0      | 0      | 0      | 0      | 0      | 1      | 0      | 0      | 0      | 0      |
| Intrasporangium       | 2              | 114            | 1      | 1      | 0      | 0      | 0      | 1      | 0      | 0      | 0      | 0      | 1      | 0      | 0      | 0      | 0      | 0      | 0      | 1      |
| Isoptericola          | 1              | 18             | 0      | 1      | 0      | 0      | 0      | 1      | 0      | 0      | 0      | 0      | 0      | 0      | 0      | 0      | 0      | 0      | 1      | 0      |
| Isosphaera            | 2              | 75             | 1      | 1      | 0      | 0      | 0      | 1      | 0      | 0      | 0      | 1      | 0      | 0      | 0      | 0      | 0      | 0      | 0      | 0      |
| Jannaschia            | 3              | 151            | 1      | 1      | 0      | 0      | 0      | 1      | 0      | 0      | 0      | 0      | 0      | 0      | 0      | 0      | 0      | 0      | 0      | 1      |
| Janthinobacterium     | 2              | 99             | 0      | 1      | 0      | 0      | 0      | 0      | 0      | 0      | 0      | 0      | 0      | 0      | 0      | 0      | 0      | 0      | 0      | 0      |
| Jonesia               | 2              | 56             | 0      | 1      | 0      | 0      | 0      | 1      | 0      | 0      | 0      | 0      | 0      | 0      | 0      | 0      | 0      | 0      | 0      | 0      |
| Joostella             | 1              | 3              | 0      | 0      | 0      | 0      | 0      | 0      | 0      | 0      | 0      | 0      | 0      | 0      | 0      | 0      | 0      | 0      | 0      | 0      |
| Kaistia               | 1              | 2              | 0      | 0      | 0      | 0      | 0      | 0      | 0      | 0      | 0      | 0      | 0      | 0      | 0      | 0      | 0      | 0      | 0      | 0      |
| Kangiella             | 2              | 84             | 0      | 1      | 0      | 0      | 0      | 1      | 0      | 0      | 0      | 0      | 0      | 0      | 0      | 0      | 0      | 0      | 0      | 0      |
| Ketogulonicigenium    | 2              | 102            | 0      | 1      | 0      | 0      | 1      | 1      | 0      | 0      | 0      | 0      | 0      | 0      | 0      | 0      | 0      | 0      | 1      | 0      |
| Kineococcus           | 1              | 24             | 1      | 1      | 0      | 0      | 0      | 1      | 0      | 0      | 0      | 0      | 1      | 0      | 0      | 0      | 0      | 0      | 1      | 0      |
| Kinetoplastibacterium | 1              | 2              | 0      | 1      | 0      | 0      | 0      | 0      | 0      | 0      | 0      | 0      | 0      | 0      | 0      | 0      | 0      | 0      | 0      | 0      |
| Kingella              | 1              | 4              | 0      | 0      | 0      | 0      | 0      | 0      | 0      | 0      | 0      | 0      | 0      | 0      | 0      | 0      | 0      | 0      | 0      | 0      |
| Kitasatospora         | 1              | 36             | 1      | 1      | 0      | 0      | 0      | 1      | 0      | 0      | 0      | 0      | 0      | 0      | 0      | 0      | 0      | 0      | 1      | 0      |
| Klebsiella            | 3              | 222            | 1      | 1      | 0      | 0      | 0      | 1      | 0      | 0      | 0      | 1      | 0      | 0      | 0      | 0      | 0      | 0      | 0      | 0      |
| Kluyvera              | 1              | 1              | 0      | 0      | 0      | 0      | 0      | 0      | 0      | 0      | 0      | 0      | 0      | 0      | 0      | 0      | 0      | 0      | 0      | 0      |
| Kocuria               | 2              | 87             | 1      | 1      | 0      | 0      | 0      | 1      | 0      | 0      | 0      | 0      | 1      | 0      | 0      | 0      | 0      | 0      | 1      | 0      |
| Kordia                | 1              | 5              | 0      | 0      | 0      | 0      | 0      | 0      | 0      | 0      | 0      | 0      | 0      | 0      | 0      | 0      | 0      | 0      | 0      | 0      |
| Kosmotoga             | 2              | 61             | 0      | 0      | 0      | 0      | 0      | 0      | 0      | 0      | 0      | 0      | 0      | 0      | 0      | 1      | 0      | 0      | 0      | 0      |
| Kribbella             | 2              | 99             | 1      | 1      | 0      | 0      | 0      | 1      | 0      | 0      | 0      | 0      | 0      | 0      | 0      | 0      | 0      | 0      | 0      | 0      |
| Krokinobacter         | 2              | 90             | 1      | 1      | 0      | 0      | 0      | 1      | 0      | 0      | 0      | 0      | 0      | 0      | 0      | 0      | 0      | 0      | 1      | 0      |
| Kyrpidia              | 2              | 113            | 1      | 1      | 0      | 0      | 0      | 1      | 0      | 0      | 0      | 0      | 0      | 0      | 0      | 0      | 0      | 0      | 0      | 1      |
| Kytococcus            | 2              | 70             | 1      | 1      | 0      | 0      | 0      | 1      | 0      | 0      | 0      | 0      | 0      | 0      | 0      | 0      | 0      | 0      | 0      | 0      |
| Labrenzia             | 1              | 4              | 0      | 0      | 0      | 0      | 0      | 0      | 0      | 0      | 0      | 0      | 0      | 0      | 0      | 0      | 0      | 0      | 0      | 0      |
| Lachnoanaerobaculum   | 1              | 1              | 0      | 0      | 0      | 0      | 0      | 0      | 0      | 0      | 0      | 0      | 0      | 0      | 0      | 0      | 0      | 0      | 0      | 0      |
| Lachnospiraceae       | 1              | 51             | 1      | 1      | 0      | 0      | 0      | 0      | 0      | 0      | 0      | 0      | 0      | 0      | 0      | 1      | 0      | 0      | 0      | 0      |
| Lacinutrix            | 1              | 20             | 1      | 1      | 0      | 0      | 0      | 1      | 0      | 0      | 0      | 0      | 0      | 0      | 0      | 0      | 0      | 0      | 1      | 0      |
| Lactobacillus         | 2              | 119            | 1      | 1      | 1      | 0      | 0      | 0      | 0      | 0      | 0      | 0      | 0      | 0      | 0      | 0      | 0      | 0      | 0      | 0      |
| Lactococcus           | 2              | 82             | 0      | 1      | 1      | 0      | 0      | 0      | 0      | 0      | 0      | 0      | 0      | 0      | 0      | 0      | 0      | 0      | 0      | 0      |
| Lamprocystis          | 1              | 2              | 0      | 0      | 0      | 0      | 0      | 0      | 0      | 0      | 0      | 0      | 0      | 0      | 0      | 0      | 0      | 0      | 0      | 0      |
| Laribacter            | 2              | 80             | 1      | 1      | 0      | 0      | 0      | 0      | 0      | 0      | 0      | 0      | 0      | 0      | 0      | 0      | 0      | 0      | 0      | 0      |
| Lawsonia              | 2              | 33             | 0      | 1      | 0      | 0      | 0      | 0      | 0      | 0      | 0      | 0      | 0      | 0      | 0      | 0      | 0      | 0      | 0      | 0      |
| Leadbetterella        | 2              | 79             | 0      | 1      | 0      | 0      | 0      | 1      | 0      | 0      | 0      | 0      | 0      | 0      | 0      | 0      | 0      | 0      | 0      | 0      |
| Leeuwenhoekiiella     | 1              | 2              | 0      | 0      | 0      | 0      | 0      | 0      | 0      | 0      | 0      | 0      | 0      | 0      | 0      | 0      | 0      | 0      | 0      | 0      |
| Legionella            | 2              | 117            | 1      | 1      | 1      | 0      | 0      | 1      | 0      | 0      | 0      | 0      | 0      | 0      | 1      | 0      | 0      | 0      | 0      | 0      |
| Leifsonia             | 2              | 48             | 0      | 1      | 1      | 0      | 0      | 1      | 0      | 0      | 0      | 0      | 0      | 0      | 0      | 0      | 0      | 0      | 0      | 0      |
| Leptolyngbya          | 1              | 10             | 0      | 1      | 0      | 0      | 0      | 0      | 0      | 0      | 0      | 0      | 0      | 0      | 0      | 0      | 0      | 0      | 0      | 0      |
| Leptospira            | 2              | 76             | 0      | 1      | 1      | 0      | 0      | 1      | 0      | 0      | 0      | 0      | 0      | 0      | 0      | 0      | 0      | 0      | 1      | 0      |
| Leptospirillum        | 1              | 10             | 1      | 1      | 0      | 0      | 0      | 0      | 0      | 0      | 0      | 0      | 0      | 0      | 0      | 1      | 0      | 0      | 0      | 0      |
| Leptothrix            | 3              | 186            | 1      | 1      | 0      | 0      | 1      | 1      | 0      | 0      | 0      | 0      | 0      | 1      | 0      | 1      | 1      | 0      | 1      | 1      |
| Leptotrichia          | 2              | 43             | 0      | 1      | 0      | 0      | 0      | 0      | 0      | 0      | 0      | 0      | 0      | 0      | 0      | 0      | 0      | 0      | 0      | 0      |
| Leucobacter           | 1              | 2              | 0      | 0      | 0      | 0      | 0      | 0      | 0      | 0      | 0      | 0      | 0      | 0      | 0      | 0      | 0      | 0      | 0      | 0      |
| Leuconostoc           | 2              | 64             | 0      | 1      | 1      | 0      | 0      | 1      | 0      | 0      | 0      | 0      | 0      | 0      | 0      | 0      | 0      | 0      | 0      | 0      |



| Genus                | Cluster Number | Protein Counts | K00074 | K00088 | K00100 | K00106 | K00114 | K00128 | K00129 | K00132 | K00141 | K00146 | K00148 | K00152 | K00155 | K00169 | K00217 | K00224 | K00274 | K00446 |
|----------------------|----------------|----------------|--------|--------|--------|--------|--------|--------|--------|--------|--------|--------|--------|--------|--------|--------|--------|--------|--------|--------|
| Liberibacter         | 1              | 4              | 0      | 1      | 0      | 0      | 0      | 0      | 0      | 0      | 0      | 0      | 0      | 0      | 0      | 0      | 0      | 0      | 0      | 0      |
| Limnohabitans        | 1              | 11             | 0      | 0      | 0      | 0      | 0      | 1      | 0      | 0      | 0      | 0      | 0      | 0      | 0      | 0      | 0      | 0      | 0      | 0      |
| Listeria             | 2              | 77             | 0      | 1      | 0      | 0      | 0      | 0      | 0      | 0      | 0      | 0      | 0      | 0      | 0      | 0      | 0      | 0      | 0      | 0      |
| Listeriaceae         | 1              | 6              | 0      | 0      | 0      | 0      | 0      | 0      | 0      | 0      | 0      | 0      | 0      | 0      | 0      | 0      | 0      | 0      | 0      | 0      |
| Listonella           | 1              | 38             | 0      | 1      | 0      | 0      | 0      | 0      | 0      | 0      | 0      | 0      | 0      | 0      | 0      | 0      | 0      | 0      | 0      | 0      |
| Loktanella           | 1              | 3              | 0      | 0      | 0      | 0      | 0      | 0      | 0      | 0      | 0      | 0      | 0      | 0      | 0      | 0      | 0      | 0      | 0      | 0      |
| Lysinibacillus       | 2              | 97             | 1      | 1      | 1      | 0      | 0      | 1      | 0      | 0      | 0      | 0      | 0      | 0      | 0      | 0      | 0      | 0      | 0      | 0      |
| Macrococcus          | 2              | 60             | 1      | 1      | 1      | 0      | 0      | 1      | 0      | 0      | 0      | 0      | 0      | 0      | 0      | 0      | 0      | 0      | 0      | 0      |
| Magnetococcus        | 2              | 64             | 0      | 1      | 0      | 0      | 0      | 0      | 0      | 0      | 0      | 0      | 0      | 0      | 1      | 0      | 0      | 0      | 0      | 0      |
| Magnetospirillum     | 2              | 113            | 1      | 1      | 0      | 0      | 0      | 0      | 0      | 0      | 0      | 0      | 0      | 0      | 0      | 1      | 0      | 0      | 0      | 0      |
| Mahella              | 2              | 58             | 0      | 1      | 1      | 0      | 0      | 0      | 0      | 0      | 0      | 0      | 0      | 0      | 0      | 1      | 0      | 0      | 0      | 0      |
| Mannheimia           | 2              | 85             | 0      | 1      | 1      | 0      | 0      | 1      | 0      | 0      | 0      | 0      | 0      | 0      | 0      | 0      | 0      | 0      | 0      | 0      |
| Maribacter           | 3              | 87             | 1      | 1      | 0      | 0      | 0      | 1      | 0      | 0      | 0      | 0      | 0      | 0      | 0      | 0      | 0      | 0      | 1      | 0      |
| Maricaulis           | 3              | 87             | 0      | 1      | 0      | 0      | 0      | 0      | 0      | 0      | 0      | 0      | 0      | 0      | 0      | 0      | 0      | 0      | 1      | 0      |
| Marichromatium       | 1              | 2              | 0      | 0      | 0      | 0      | 0      | 0      | 0      | 0      | 0      | 0      | 0      | 0      | 0      | 0      | 0      | 0      | 0      | 0      |
| Marinithermus        | 2              | 77             | 1      | 1      | 0      | 0      | 0      | 1      | 0      | 0      | 0      | 0      | 0      | 0      | 0      | 0      | 0      | 0      | 0      | 1      |
| Marinitoga           | 1              | 15             | 1      | 1      | 0      | 0      | 0      | 0      | 0      | 0      | 0      | 0      | 0      | 0      | 0      | 1      | 0      | 0      | 0      | 0      |
| Marinobacter         | 2              | 163            | 1      | 1      | 0      | 0      | 1      | 1      | 0      | 0      | 0      | 0      | 1      | 0      | 0      | 0      | 0      | 0      | 0      | 1      |
| Marinomonas          | 3              | 192            | 1      | 1      | 0      | 0      | 0      | 1      | 0      | 0      | 1      | 1      | 1      | 0      | 0      | 0      | 0      | 0      | 0      | 0      |
| Maritimibacter       | 1              | 7              | 0      | 0      | 0      | 0      | 0      | 0      | 0      | 0      | 0      | 0      | 0      | 0      | 0      | 0      | 0      | 0      | 0      | 0      |
| Marivirga            | 2              | 96             | 1      | 1      | 0      | 0      | 0      | 1      | 0      | 0      | 0      | 0      | 0      | 0      | 0      | 0      | 0      | 0      | 0      | 0      |
| Martella             | 1              | 3              | 0      | 0      | 0      | 0      | 0      | 0      | 0      | 0      | 0      | 0      | 0      | 0      | 0      | 0      | 0      | 0      | 0      | 0      |
| Marvinbryantia       | 1              | 1              | 0      | 0      | 0      | 0      | 0      | 0      | 0      | 0      | 0      | 0      | 0      | 0      | 0      | 0      | 0      | 0      | 0      | 0      |
| Massilia             | 1              | 4              | 0      | 0      | 0      | 0      | 0      | 0      | 0      | 0      | 0      | 0      | 0      | 0      | 0      | 0      | 0      | 0      | 0      | 0      |
| Mastigocladopsis     | 1              | 16             | 0      | 1      | 0      | 0      | 0      | 0      | 0      | 0      | 0      | 0      | 0      | 0      | 0      | 0      | 0      | 0      | 0      | 0      |
| Megamonas            | 1              | 47             | 0      | 0      | 0      | 0      | 0      | 0      | 0      | 0      | 0      | 0      | 0      | 0      | 0      | 0      | 0      | 0      | 0      | 0      |
| Megasphaera          | 1              | 14             | 1      | 1      | 1      | 0      | 0      | 0      | 0      | 0      | 0      | 0      | 0      | 0      | 0      | 0      | 0      | 0      | 0      | 0      |
| Meiothermus          | 2              | 110            | 1      | 1      | 0      | 0      | 0      | 1      | 0      | 0      | 0      | 0      | 0      | 0      | 0      | 0      | 0      | 0      | 0      | 1      |
| Melissococcus        | 2              | 46             | 0      | 1      | 0      | 0      | 0      | 0      | 0      | 0      | 0      | 0      | 0      | 0      | 0      | 0      | 0      | 0      | 0      | 0      |
| Mesoflavibacter      | 1              | 6              | 0      | 0      | 0      | 0      | 0      | 0      | 0      | 0      | 0      | 0      | 0      | 0      | 0      | 0      | 0      | 0      | 0      | 0      |
| Mesoplasma           | 1              | 23             | 0      | 1      | 0      | 0      | 0      | 0      | 0      | 0      | 0      | 0      | 0      | 0      | 0      | 0      | 0      | 0      | 0      | 0      |
| Mesorhizobium        | 2              | 201            | 1      | 1      | 1      | 0      | 0      | 1      | 0      | 0      | 0      | 1      | 0      | 0      | 0      | 0      | 0      | 0      | 1      | 1      |
| Mesotoga             | 1              | 14             | 0      | 0      | 0      | 0      | 0      | 0      | 0      | 0      | 0      | 0      | 0      | 0      | 0      | 0      | 0      | 0      | 0      | 0      |
| Metallosphaera       | 1              | 18             | 1      | 0      | 0      | 0      | 0      | 0      | 0      | 0      | 0      | 0      | 0      | 0      | 0      | 1      | 1      | 0      | 0      | 1      |
| Methanobacterium     | 1              | 7              | 0      | 1      | 0      | 0      | 0      | 0      | 0      | 0      | 0      | 0      | 0      | 0      | 0      | 1      | 0      | 0      | 0      | 0      |
| Methanobrevibacter   | 1              | 9              | 1      | 1      | 0      | 0      | 0      | 0      | 0      | 0      | 0      | 0      | 0      | 0      | 0      | 1      | 0      | 0      | 0      | 0      |
| Methanocaldococcus   | 1              | 6              | 0      | 1      | 0      | 0      | 0      | 0      | 0      | 0      | 0      | 0      | 0      | 0      | 0      | 1      | 0      | 0      | 0      | 0      |
| Methanocella         | 1              | 15             | 0      | 1      | 1      | 0      | 0      | 0      | 0      | 0      | 0      | 0      | 1      | 0      | 0      | 1      | 0      | 0      | 0      | 0      |
| Methanococcaceae     | 1              | 1              | 0      | 0      | 0      | 0      | 0      | 0      | 0      | 0      | 0      | 0      | 0      | 0      | 0      | 0      | 0      | 0      | 0      | 0      |
| Methanococcoides     | 1              | 5              | 0      | 0      | 0      | 0      | 0      | 0      | 0      | 0      | 0      | 0      | 0      | 0      | 0      | 1      | 0      | 0      | 0      | 0      |
| Methanococcus        | 1              | 9              | 0      | 1      | 0      | 0      | 0      | 0      | 0      | 0      | 0      | 0      | 0      | 0      | 0      | 1      | 0      | 0      | 0      | 0      |
| Methanocorpusculum   | 1              | 7              | 0      | 1      | 0      | 0      | 0      | 0      | 0      | 0      | 0      | 0      | 0      | 0      | 0      | 1      | 0      | 0      | 0      | 0      |
| Methanoculleus       | 1              | 8              | 0      | 1      | 0      | 0      | 0      | 0      | 0      | 0      | 0      | 0      | 0      | 0      | 0      | 1      | 0      | 0      | 0      | 0      |
| Methanohalobium      | 1              | 5              | 0      | 0      | 0      | 0      | 0      | 0      | 0      | 0      | 0      | 0      | 0      | 0      | 0      | 1      | 0      | 0      | 0      | 0      |
| Methanohalophilus    | 1              | 5              | 0      | 0      | 0      | 0      | 0      | 0      | 0      | 0      | 0      | 0      | 0      | 0      | 0      | 1      | 0      | 0      | 0      | 0      |
| Methanolobus         | 1              | 5              | 0      | 0      | 0      | 0      | 0      | 0      | 0      | 0      | 0      | 0      | 0      | 0      | 0      | 1      | 0      | 0      | 0      | 0      |
| Methanomethylovorans | 1              | 5              | 0      | 0      | 0      | 0      | 0      | 0      | 0      | 0      | 0      | 0      | 0      | 0      | 0      | 1      | 0      | 0      | 0      | 0      |
| Methanoplanus        | 1              | 7              | 0      | 1      | 0      | 0      | 0      | 0      | 0      | 0      | 0      | 0      | 0      | 0      | 0      | 1      | 0      | 0      | 0      | 0      |
| Methanopyrus         | 1              | 4              | 0      | 1      | 0      | 0      | 0      | 0      | 0      | 0      | 0      | 0      | 0      | 0      | 0      | 1      | 0      | 0      | 0      | 0      |
| Methanoregula        | 1              | 8              | 0      | 1      | 0      | 0      | 0      | 0      | 0      | 0      | 0      | 0      | 0      | 0      | 0      | 1      | 0      | 0      | 0      | 0      |
| Methanosaeta         | 1              | 9              | 0      | 0      | 0      | 0      | 0      | 0      | 0      | 0      | 0      | 0      | 0      | 0      | 0      | 1      | 0      | 0      | 0      | 0      |
| Methanosalsum        | 1              | 7              | 0      | 0      | 0      | 0      | 0      | 1      | 0      | 0      | 0      | 0      | 0      | 0      | 0      | 1      | 0      | 0      | 0      | 0      |

| Genus               | Cluster Number | Protein Counts | K00074 | K00088 | K00100 | K00106 | K00114 | K00128 | K00129 | K00132 | K00141 | K00146 | K00148 | K00152 | K00155 | K00169 | K00217 | K00224 | K00274 | K00446 |
|---------------------|----------------|----------------|--------|--------|--------|--------|--------|--------|--------|--------|--------|--------|--------|--------|--------|--------|--------|--------|--------|--------|
| Methanosarcina      | 1              | 18             | 0      | 0      | 1      | 0      | 0      | 1      | 0      | 0      | 0      | 0      | 1      | 0      | 0      | 1      | 0      | 0      | 0      | 0      |
| Methanosphaera      | 1              | 7              | 1      | 1      | 0      | 0      | 0      | 0      | 0      | 0      | 0      | 0      | 0      | 0      | 0      | 1      | 0      | 0      | 0      | 0      |
| Methanosphaerula    | 1              | 8              | 0      | 1      | 0      | 0      | 0      | 0      | 0      | 0      | 0      | 0      | 0      | 0      | 0      | 1      | 0      | 0      | 0      | 0      |
| Methanospirillum    | 1              | 6              | 0      | 1      | 0      | 0      | 0      | 0      | 0      | 0      | 0      | 0      | 0      | 0      | 0      | 1      | 0      | 0      | 0      | 0      |
| Methanothermobacter | 1              | 6              | 0      | 1      | 0      | 0      | 0      | 0      | 0      | 0      | 0      | 0      | 0      | 0      | 0      | 1      | 0      | 0      | 0      | 0      |
| Methanothermococcus | 1              | 5              | 0      | 1      | 0      | 0      | 0      | 0      | 0      | 0      | 0      | 0      | 0      | 0      | 0      | 1      | 0      | 0      | 0      | 0      |
| Methanothermus      | 1              | 5              | 0      | 1      | 0      | 0      | 0      | 0      | 0      | 0      | 0      | 0      | 0      | 0      | 0      | 1      | 0      | 0      | 0      | 0      |
| Methanotorris       | 1              | 5              | 0      | 1      | 0      | 0      | 0      | 0      | 0      | 0      | 0      | 0      | 0      | 0      | 0      | 1      | 0      | 0      | 0      | 0      |
| Methylacidiphilum   | 2              | 48             | 0      | 1      | 0      | 0      | 0      | 0      | 0      | 0      | 0      | 1      | 0      | 0      | 0      | 0      | 0      | 0      | 0      | 0      |
| Methylarcula        | 1              | 2              | 0      | 0      | 0      | 0      | 0      | 0      | 0      | 0      | 0      | 0      | 0      | 0      | 0      | 0      | 0      | 0      | 0      | 0      |
| Methylibium         | 1              | 38             | 1      | 1      | 1      | 0      | 1      | 1      | 0      | 0      | 0      | 0      | 0      | 0      | 0      | 0      | 0      | 0      | 0      | 1      |
| Methylobacillus     | 2              | 61             | 0      | 1      | 1      | 0      | 0      | 1      | 0      | 0      | 0      | 0      | 0      | 0      | 0      | 0      | 0      | 0      | 0      | 0      |
| Methylobacterium    | 3              | 236            | 1      | 1      | 0      | 0      | 1      | 1      | 0      | 0      | 0      | 0      | 0      | 0      | 0      | 0      | 0      | 0      | 1      | 0      |
| Methylocella        | 3              | 117            | 1      | 1      | 0      | 0      | 1      | 1      | 0      | 0      | 0      | 1      | 0      | 0      | 0      | 0      | 0      | 0      | 1      | 1      |
| Methylococcus       | 2              | 80             | 0      | 1      | 0      | 0      | 0      | 0      | 0      | 0      | 0      | 0      | 0      | 0      | 0      | 0      | 0      | 0      | 0      | 0      |
| Methylocystis       | 1              | 21             | 1      | 1      | 0      | 0      | 0      | 0      | 0      | 0      | 0      | 0      | 0      | 0      | 0      | 0      | 0      | 0      | 1      | 0      |
| Methyloferula       | 1              | 2              | 0      | 0      | 0      | 0      | 0      | 0      | 0      | 0      | 0      | 0      | 0      | 0      | 0      | 0      | 0      | 0      | 0      | 0      |
| Methylomicrobium    | 1              | 12             | 0      | 1      | 0      | 0      | 0      | 0      | 0      | 0      | 0      | 0      | 0      | 0      | 0      | 0      | 0      | 0      | 0      | 0      |
| Methylomonas        | 1              | 15             | 0      | 1      | 0      | 0      | 0      | 0      | 0      | 0      | 0      | 0      | 0      | 0      | 0      | 0      | 0      | 0      | 1      | 0      |
| Methylophaga        | 1              | 7              | 0      | 1      | 0      | 0      | 0      | 0      | 0      | 0      | 0      | 0      | 0      | 0      | 0      | 0      | 0      | 0      | 0      | 0      |
| Methylophilus       | 1              | 2              | 0      | 0      | 0      | 0      | 0      | 0      | 0      | 0      | 0      | 0      | 0      | 0      | 0      | 0      | 0      | 0      | 0      | 0      |
| Methylosinus        | 1              | 2              | 0      | 0      | 0      | 0      | 0      | 0      | 0      | 0      | 0      | 0      | 0      | 0      | 0      | 0      | 0      | 0      | 0      | 0      |
| Methylotenera       | 2              | 72             | 0      | 1      | 0      | 0      | 0      | 1      | 0      | 0      | 0      | 0      | 0      | 0      | 0      | 0      | 0      | 0      | 0      | 0      |
| Methyloversatilis   | 1              | 5              | 0      | 0      | 0      | 0      | 0      | 0      | 0      | 0      | 0      | 0      | 0      | 0      | 0      | 0      | 0      | 0      | 0      | 0      |
| Methylovorus        | 2              | 66             | 0      | 1      | 0      | 0      | 0      | 1      | 0      | 0      | 0      | 0      | 0      | 0      | 0      | 0      | 0      | 0      | 0      | 0      |
| Micavibrio          | 1              | 9              | 0      | 1      | 0      | 0      | 0      | 0      | 0      | 0      | 0      | 0      | 0      | 0      | 0      | 0      | 0      | 0      | 0      | 0      |
| Microbacterium      | 2              | 115            | 1      | 1      | 0      | 0      | 0      | 1      | 0      | 0      | 0      | 0      | 0      | 0      | 0      | 0      | 0      | 0      | 1      | 1      |
| Microchaete         | 1              | 23             | 0      | 1      | 0      | 0      | 0      | 0      | 0      | 0      | 0      | 0      | 0      | 0      | 0      | 0      | 0      | 0      | 0      | 0      |
| Micrococcus         | 2              | 72             | 1      | 1      | 0      | 0      | 0      | 1      | 0      | 0      | 0      | 0      | 1      | 0      | 0      | 0      | 0      | 0      | 0      | 0      |
| Microcoleus         | 1              | 17             | 1      | 1      | 0      | 0      | 0      | 0      | 0      | 0      | 0      | 0      | 0      | 0      | 0      | 0      | 0      | 0      | 0      | 0      |
| Microcystis         | 2              | 67             | 0      | 1      | 0      | 0      | 0      | 1      | 0      | 0      | 0      | 0      | 0      | 0      | 0      | 0      | 0      | 0      | 1      | 0      |
| Microlunatus        | 1              | 25             | 1      | 1      | 0      | 0      | 0      | 1      | 0      | 0      | 0      | 0      | 1      | 0      | 0      | 0      | 0      | 0      | 1      | 0      |
| Micromonospora      | 2              | 115            | 1      | 1      | 0      | 0      | 0      | 1      | 0      | 0      | 0      | 0      | 1      | 0      | 0      | 0      | 0      | 0      | 1      | 0      |
| Microvirga          | 1              | 6              | 0      | 0      | 0      | 0      | 0      | 0      | 0      | 0      | 0      | 0      | 0      | 0      | 0      | 0      | 0      | 0      | 0      | 0      |
| Mobiluncus          | 1              | 41             | 0      | 1      | 0      | 0      | 0      | 0      | 0      | 0      | 0      | 0      | 0      | 0      | 0      | 1      | 0      | 0      | 0      | 0      |
| Modestobacter       | 1              | 43             | 1      | 1      | 0      | 0      | 0      | 0      | 0      | 0      | 0      | 0      | 1      | 0      | 0      | 0      | 0      | 0      | 0      | 1      |
| Moorea              | 1              | 2              | 0      | 0      | 0      | 0      | 0      | 0      | 0      | 0      | 0      | 0      | 0      | 0      | 0      | 0      | 0      | 0      | 0      | 0      |
| Moorella            | 2              | 69             | 0      | 1      | 0      | 0      | 0      | 0      | 0      | 0      | 0      | 0      | 0      | 0      | 0      | 1      | 0      | 0      | 0      | 0      |
| Moraxella           | 2              | 66             | 0      | 1      | 0      | 0      | 0      | 1      | 0      | 0      | 0      | 0      | 0      | 0      | 0      | 0      | 0      | 0      | 0      | 0      |
| Morganella          | 1              | 29             | 0      | 1      | 0      | 0      | 0      | 0      | 0      | 0      | 0      | 0      | 0      | 0      | 0      | 0      | 0      | 0      | 0      | 0      |
| Moritella           | 1              | 2              | 0      | 0      | 0      | 0      | 0      | 0      | 0      | 0      | 0      | 0      | 0      | 0      | 0      | 0      | 0      | 0      | 0      | 0      |
| Muricauda           | 1              | 23             | 1      | 1      | 0      | 0      | 0      | 1      | 0      | 0      | 0      | 0      | 0      | 0      | 0      | 0      | 0      | 0      | 0      | 0      |
| Mycobacterium       | 3              | 306            | 1      | 1      | 1      | 0      | 1      | 1      | 0      | 0      | 0      | 1      | 0      | 0      | 1      | 0      | 1      | 0      | 1      | 0      |
| Mycoplasma          | 1              | 53             | 0      | 1      | 1      | 0      | 0      | 1      | 0      | 0      | 0      | 0      | 0      | 0      | 0      | 0      | 0      | 0      | 0      | 0      |
| Myxococcus          | 2              | 110            | 1      | 1      | 0      | 1      | 0      | 1      | 0      | 0      | 0      | 0      | 1      | 0      | 0      | 0      | 0      | 0      | 1      | 0      |
| Nakamurella         | 2              | 115            | 1      | 1      | 0      | 0      | 0      | 1      | 0      | 0      | 0      | 0      | 1      | 0      | 0      | 0      | 0      | 0      | 0      | 0      |
| napthalene          | 1              | 2              | 0      | 0      | 0      | 0      | 0      | 0      | 0      | 0      | 0      | 0      | 0      | 0      | 0      | 0      | 0      | 0      | 0      | 0      |
| Natranaerobius      | 2              | 55             | 1      | 1      | 0      | 0      | 0      | 0      | 0      | 0      | 0      | 0      | 0      | 0      | 0      | 0      | 0      | 0      | 0      | 0      |
| Natrialba           | 1              | 16             | 1      | 1      | 0      | 0      | 0      | 1      | 0      | 0      | 0      | 0      | 0      | 0      | 0      | 0      | 0      | 0      | 1      | 0      |
| Natrinema           | 1              | 16             | 1      | 1      | 0      | 0      | 1      | 1      | 0      | 0      | 0      | 0      | 0      | 0      | 0      | 0      | 0      | 0      | 0      | 0      |
| Natronobacterium    | 1              | 11             | 1      | 1      | 0      | 0      | 0      | 0      | 0      | 0      | 0      | 0      | 0      | 0      | 0      | 0      | 0      | 0      | 1      | 0      |
| Natronococcus       | 1              | 21             | 1      | 1      | 0      | 0      | 1      | 1      | 0      | 0      | 0      | 0      | 1      | 0      | 0      | 0      | 0      | 0      | 1      | 0      |

| Genus             | Cluster Number | Protein Counts | K00074 | K00088 | K00100 | K00106 | K00114 | K00128 | K00129 | K00132 | K00141 | K00146 | K00148 | K00152 | K00155 | K00169 | K00217 | K00224 | K00274 | K00446 |
|-------------------|----------------|----------------|--------|--------|--------|--------|--------|--------|--------|--------|--------|--------|--------|--------|--------|--------|--------|--------|--------|--------|
| Natronomonas      | 1              | 20             | 1      | 1      | 1      | 0      | 0      | 1      | 0      | 0      | 0      | 0      | 0      | 0      | 1      | 0      | 0      | 0      | 0      | 0      |
| Nautilia          | 2              | 48             | 0      | 1      | 0      | 0      | 0      | 0      | 0      | 0      | 0      | 0      | 0      | 0      | 0      | 1      | 0      | 0      | 0      | 0      |
| Neisseria         | 2              | 67             | 0      | 1      | 0      | 0      | 0      | 0      | 0      | 0      | 0      | 0      | 0      | 0      | 0      | 0      | 0      | 0      | 0      | 0      |
| Neisseriaceae     | 1              | 1              | 0      | 0      | 0      | 0      | 0      | 0      | 0      | 0      | 0      | 0      | 0      | 0      | 0      | 0      | 0      | 0      | 0      | 0      |
| Neorickettsia     | 1              | 31             | 0      | 1      | 0      | 0      | 0      | 0      | 0      | 0      | 0      | 0      | 0      | 0      | 0      | 0      | 0      | 0      | 0      | 0      |
| Neptuniibacter    | 1              | 2              | 0      | 0      | 0      | 0      | 0      | 0      | 0      | 0      | 0      | 0      | 0      | 0      | 0      | 0      | 0      | 0      | 0      | 0      |
| Niastella         | 1              | 21             | 1      | 1      | 0      | 0      | 0      | 0      | 0      | 0      | 0      | 0      | 0      | 0      | 0      | 0      | 0      | 0      | 0      | 0      |
| Nitratifractor    | 2              | 54             | 0      | 1      | 0      | 0      | 0      | 0      | 0      | 0      | 0      | 0      | 0      | 0      | 0      | 1      | 0      | 0      | 0      | 0      |
| Nitratireductor   | 1              | 19             | 0      | 0      | 0      | 0      | 0      | 0      | 0      | 0      | 0      | 0      | 0      | 0      | 0      | 0      | 0      | 0      | 0      | 0      |
| Nitratiruptor     | 2              | 40             | 0      | 1      | 0      | 0      | 0      | 0      | 0      | 0      | 0      | 0      | 0      | 0      | 0      | 1      | 0      | 0      | 0      | 0      |
| Nitrobacter       | 2              | 99             | 1      | 1      | 0      | 0      | 0      | 1      | 0      | 0      | 0      | 0      | 0      | 0      | 0      | 0      | 0      | 0      | 1      | 0      |
| Nitrococcus       | 1              | 2              | 0      | 0      | 0      | 0      | 0      | 0      | 0      | 0      | 0      | 0      | 0      | 0      | 0      | 0      | 0      | 0      | 0      | 0      |
| Nitrosococcus     | 2              | 94             | 0      | 1      | 0      | 0      | 0      | 1      | 0      | 0      | 0      | 0      | 0      | 0      | 0      | 0      | 0      | 0      | 0      | 0      |
| Nitrosomonas      | 2              | 72             | 0      | 1      | 0      | 0      | 0      | 0      | 0      | 0      | 0      | 0      | 0      | 0      | 0      | 0      | 0      | 0      | 0      | 0      |
| Nitrosopumilaceae | 1              | 7              | 0      | 1      | 0      | 0      | 0      | 0      | 0      | 0      | 0      | 0      | 0      | 0      | 0      | 0      | 0      | 0      | 0      | 0      |
| Nitrosopumilus    | 1              | 11             | 0      | 1      | 0      | 0      | 0      | 0      | 0      | 0      | 0      | 0      | 0      | 0      | 0      | 0      | 0      | 0      | 0      | 0      |
| Nitrospira        | 2              | 74             | 0      | 1      | 0      | 0      | 0      | 0      | 0      | 0      | 0      | 0      | 0      | 0      | 0      | 0      | 0      | 0      | 0      | 0      |
| Nocardia          | 2              | 185            | 1      | 1      | 1      | 0      | 0      | 1      | 0      | 0      | 0      | 0      | 0      | 0      | 1      | 0      | 0      | 0      | 1      | 1      |
| Nocardioidaceae   | 1              | 2              | 0      | 0      | 0      | 0      | 0      | 0      | 0      | 0      | 0      | 0      | 0      | 0      | 0      | 0      | 0      | 0      | 0      | 0      |
| Nocardioides      | 2              | 157            | 1      | 1      | 0      | 0      | 0      | 1      | 0      | 0      | 0      | 0      | 0      | 0      | 0      | 1      | 0      | 0      | 1      | 0      |
| Nocardiopsis      | 2              | 102            | 1      | 1      | 0      | 0      | 0      | 1      | 0      | 0      | 0      | 0      | 1      | 0      | 0      | 0      | 0      | 0      | 1      | 0      |
| Nodularia         | 1              | 22             | 0      | 1      | 0      | 0      | 0      | 0      | 0      | 0      | 0      | 0      | 0      | 0      | 0      | 0      | 0      | 0      | 0      | 0      |
| Nonlabens         | 1              | 19             | 1      | 1      | 0      | 0      | 0      | 1      | 0      | 0      | 0      | 0      | 0      | 0      | 0      | 0      | 0      | 0      | 1      | 0      |
| Nostoc            | 2              | 111            | 1      | 1      | 0      | 0      | 0      | 1      | 0      | 0      | 0      | 0      | 0      | 0      | 0      | 0      | 0      | 1      | 1      | 0      |
| Nostocaceae       | 1              | 2              | 0      | 0      | 0      | 0      | 0      | 0      | 0      | 0      | 0      | 0      | 0      | 0      | 0      | 0      | 0      | 0      | 0      | 0      |
| Novosphingobium   | 2              | 169            | 1      | 1      | 0      | 0      | 1      | 1      | 0      | 0      | 0      | 1      | 0      | 0      | 0      | 0      | 0      | 0      | 0      | 1      |
| Oceanibaculum     | 1              | 3              | 0      | 0      | 0      | 0      | 0      | 0      | 0      | 0      | 0      | 0      | 0      | 0      | 0      | 0      | 0      | 0      | 0      | 0      |
| Oceanibulbus      | 1              | 12             | 0      | 1      | 0      | 0      | 0      | 0      | 0      | 0      | 0      | 0      | 0      | 0      | 0      | 0      | 0      | 0      | 0      | 0      |
| Oceanicola        | 1              | 9              | 0      | 0      | 0      | 0      | 0      | 1      | 0      | 0      | 0      | 0      | 0      | 0      | 0      | 0      | 0      | 0      | 0      | 0      |
| Oceanimonas       | 1              | 33             | 0      | 1      | 0      | 0      | 0      | 1      | 0      | 0      | 0      | 0      | 1      | 0      | 0      | 0      | 0      | 0      | 0      | 0      |
| Oceaniovalibus    | 1              | 2              | 0      | 0      | 0      | 0      | 0      | 0      | 0      | 0      | 0      | 0      | 0      | 0      | 0      | 0      | 0      | 0      | 0      | 0      |
| Oceanithermus     | 2              | 72             | 1      | 1      | 0      | 0      | 0      | 1      | 0      | 0      | 0      | 0      | 0      | 0      | 0      | 0      | 0      | 0      | 0      | 0      |
| Oceanobacillus    | 2              | 91             | 1      | 1      | 1      | 0      | 0      | 1      | 0      | 0      | 0      | 0      | 0      | 0      | 1      | 0      | 0      | 0      | 0      | 0      |
| Oceanospirillum   | 1              | 2              | 0      | 0      | 0      | 0      | 0      | 0      | 0      | 0      | 0      | 0      | 0      | 0      | 0      | 0      | 0      | 0      | 0      | 0      |
| Ochrobactrum      | 2              | 133            | 1      | 1      | 0      | 0      | 0      | 1      | 0      | 0      | 0      | 0      | 1      | 0      | 1      | 0      | 0      | 0      | 0      | 0      |
| Octadecabacter    | 1              | 29             | 1      | 1      | 0      | 0      | 0      | 0      | 0      | 0      | 0      | 0      | 0      | 0      | 0      | 0      | 0      | 0      | 1      | 0      |
| Oenococcus        | 2              | 41             | 0      | 1      | 0      | 0      | 0      | 0      | 0      | 0      | 0      | 0      | 0      | 0      | 0      | 0      | 0      | 0      | 0      | 0      |
| Oleomonas         | 1              | 2              | 0      | 0      | 0      | 0      | 0      | 0      | 0      | 0      | 0      | 0      | 0      | 0      | 0      | 0      | 0      | 0      | 0      | 0      |
| Oligotropha       | 3              | 87             | 1      | 1      | 0      | 0      | 0      | 1      | 0      | 0      | 0      | 0      | 0      | 0      | 0      | 0      | 0      | 0      | 1      | 0      |
| Olsenella         | 2              | 40             | 1      | 1      | 1      | 0      | 0      | 0      | 0      | 0      | 0      | 0      | 0      | 0      | 0      | 0      | 0      | 0      | 0      | 0      |
| Opitutus          | 2              | 67             | 0      | 1      | 0      | 0      | 0      | 1      | 0      | 0      | 0      | 0      | 0      | 0      | 0      | 0      | 0      | 0      | 1      | 0      |
| Orientia          | 1              | 21             | 0      | 0      | 0      | 0      | 0      | 0      | 0      | 0      | 0      | 0      | 0      | 0      | 0      | 0      | 0      | 0      | 0      | 0      |
| Ornithobacterium  | 1              | 11             | 0      | 1      | 0      | 0      | 0      | 0      | 0      | 0      | 0      | 0      | 0      | 0      | 0      | 0      | 0      | 0      | 0      | 0      |
| Oscillatoria      | 1              | 16             | 0      | 1      | 0      | 0      | 0      | 1      | 0      | 0      | 0      | 0      | 0      | 0      | 0      | 0      | 0      | 0      | 1      | 0      |
| Oscillatoriales   | 1              | 2              | 0      | 0      | 0      | 0      | 0      | 0      | 0      | 0      | 0      | 0      | 0      | 0      | 0      | 0      | 0      | 0      | 0      | 0      |
| Oscillibacter     | 1              | 20             | 1      | 1      | 1      | 0      | 0      | 0      | 0      | 0      | 0      | 0      | 0      | 0      | 0      | 1      | 0      | 0      | 0      | 0      |
| Owenweeksia       | 1              | 15             | 1      | 1      | 0      | 0      | 0      | 1      | 0      | 0      | 0      | 0      | 0      | 0      | 0      | 0      | 0      | 0      | 0      | 0      |
| Oxalobacteraceae  | 1              | 4              | 0      | 0      | 0      | 0      | 0      | 0      | 0      | 0      | 0      | 0      | 0      | 0      | 0      | 0      | 0      | 0      | 0      | 0      |
| Paenibacillus     | 2              | 152            | 1      | 1      | 1      | 0      | 0      | 1      | 0      | 0      | 0      | 0      | 0      | 0      | 0      | 1      | 0      | 0      | 1      | 0      |
| Paludibacter      | 2              | 67             | 1      | 1      | 1      | 0      | 0      | 0      | 0      | 0      | 0      | 0      | 0      | 0      | 0      | 0      | 0      | 0      | 0      | 0      |
| Pandoraea         | 1              | 18             | 0      | 0      | 0      | 0      | 0      | 0      | 0      | 0      | 0      | 0      | 0      | 0      | 0      | 0      | 0      | 0      | 0      | 0      |
| Pannonibacter     | 1              | 3              | 0      | 0      | 0      | 0      | 0      | 0      | 0      | 0      | 0      | 0      | 1      | 0      | 0      | 0      | 0      | 0      | 0      | 0      |

| Genus              | Cluster Number | Protein Counts | K00074 | K00088 | K00100 | K00106 | K00114 | K00128 | K00129 | K00132 | K00141 | K00146 | K00148 | K00152 | K00155 | K00169 | K00217 | K00224 | K00274 | K00446 |
|--------------------|----------------|----------------|--------|--------|--------|--------|--------|--------|--------|--------|--------|--------|--------|--------|--------|--------|--------|--------|--------|--------|
| Pantholops         | 1              | 23             | 0      | 0      | 0      | 0      | 0      | 0      | 0      | 0      | 0      | 0      | 0      | 0      | 0      | 0      | 0      | 0      | 0      | 0      |
| Pantoea            | 2              | 181            | 0      | 1      | 0      | 0      | 0      | 1      | 0      | 0      | 0      | 0      | 1      | 0      | 0      | 0      | 0      | 0      | 0      | 1      |
| Parabacteroides    | 2              | 64             | 0      | 1      | 0      | 0      | 0      | 0      | 0      | 0      | 0      | 0      | 0      | 0      | 0      | 0      | 0      | 0      | 0      | 0      |
| Parachlamydia      | 1              | 11             | 0      | 0      | 0      | 0      | 0      | 0      | 0      | 0      | 0      | 0      | 0      | 0      | 0      | 0      | 0      | 0      | 1      | 0      |
| Paracoccus         | 2              | 169            | 1      | 1      | 0      | 0      | 0      | 1      | 0      | 0      | 0      | 0      | 1      | 1      | 0      | 0      | 0      | 0      | 0      | 0      |
| Parvibaculum       | 3              | 117            | 1      | 1      | 0      | 0      | 1      | 1      | 0      | 0      | 0      | 0      | 0      | 0      | 0      | 0      | 0      | 0      | 1      | 0      |
| Parvularcula       | 2              | 72             | 1      | 1      | 0      | 0      | 0      | 0      | 0      | 0      | 0      | 0      | 0      | 0      | 0      | 0      | 0      | 0      | 1      | 0      |
| Pasteurella        | 2              | 85             | 0      | 1      | 0      | 0      | 0      | 0      | 0      | 0      | 0      | 0      | 0      | 0      | 0      | 0      | 0      | 0      | 0      | 0      |
| Pasteurellaceae    | 1              | 2              | 0      | 0      | 0      | 0      | 0      | 0      | 0      | 0      | 0      | 0      | 0      | 0      | 0      | 0      | 0      | 0      | 0      | 0      |
| Pectobacterium     | 1              | 44             | 0      | 1      | 0      | 0      | 0      | 0      | 0      | 0      | 0      | 0      | 0      | 0      | 0      | 0      | 0      | 0      | 0      | 0      |
| Pediococcus        | 1              | 43             | 0      | 1      | 0      | 0      | 0      | 0      | 0      | 0      | 0      | 0      | 0      | 0      | 0      | 0      | 0      | 0      | 0      | 0      |
| Pedobacter         | 2              | 88             | 1      | 1      | 0      | 0      | 0      | 1      | 0      | 0      | 0      | 0      | 0      | 0      | 0      | 0      | 0      | 0      | 0      | 0      |
| Pelagibaca         | 1              | 10             | 0      | 0      | 0      | 0      | 0      | 0      | 0      | 0      | 0      | 0      | 0      | 0      | 0      | 0      | 0      | 0      | 0      | 0      |
| Pelagibacterium    | 1              | 39             | 0      | 1      | 0      | 0      | 1      | 1      | 0      | 0      | 0      | 0      | 1      | 0      | 0      | 0      | 0      | 0      | 0      | 1      |
| Pelobacter         | 2              | 85             | 1      | 1      | 1      | 0      | 0      | 1      | 0      | 0      | 0      | 0      | 0      | 0      | 0      | 1      | 0      | 0      | 0      | 0      |
| Pelodictyon        | 2              | 62             | 0      | 1      | 0      | 0      | 0      | 0      | 0      | 0      | 0      | 0      | 0      | 0      | 0      | 0      | 0      | 0      | 0      | 0      |
| Pelosinus          | 1              | 1              | 0      | 0      | 0      | 0      | 0      | 0      | 0      | 0      | 0      | 0      | 0      | 0      | 0      | 0      | 0      | 0      | 0      | 0      |
| Pelotomaculum      | 2              | 60             | 1      | 1      | 0      | 0      | 0      | 0      | 0      | 0      | 0      | 0      | 0      | 0      | 0      | 0      | 0      | 0      | 0      | 0      |
| Peptostreptococcus | 1              | 1              | 0      | 0      | 0      | 0      | 0      | 0      | 0      | 0      | 0      | 0      | 0      | 0      | 0      | 0      | 0      | 0      | 0      | 0      |
| Persephonella      | 2              | 55             | 0      | 1      | 0      | 0      | 0      | 0      | 0      | 0      | 0      | 0      | 0      | 0      | 0      | 1      | 0      | 0      | 0      | 0      |
| Petrotoga          | 2              | 72             | 0      | 1      | 1      | 0      | 0      | 0      | 0      | 0      | 0      | 0      | 0      | 0      | 0      | 1      | 0      | 0      | 0      | 0      |
| Phaeobacter        | 2              | 55             | 1      | 1      | 0      | 0      | 0      | 1      | 0      | 0      | 0      | 0      | 0      | 0      | 0      | 0      | 0      | 0      | 0      | 0      |
| Phenylobacterium   | 3              | 103            | 1      | 1      | 0      | 0      | 1      | 1      | 0      | 0      | 0      | 0      | 0      | 0      | 0      | 0      | 0      | 0      | 0      | 0      |
| Photobacterium     | 2              | 119            | 0      | 1      | 1      | 0      | 0      | 1      | 0      | 0      | 0      | 0      | 0      | 0      | 0      | 0      | 0      | 0      | 0      | 0      |
| Photorhabdus       | 2              | 149            | 1      | 1      | 0      | 0      | 0      | 1      | 0      | 0      | 0      | 1      | 0      | 0      | 0      | 0      | 0      | 0      | 0      | 0      |
| Phycisphaera       | 1              | 9              | 0      | 1      | 0      | 0      | 0      | 0      | 0      | 0      | 0      | 0      | 0      | 0      | 0      | 0      | 0      | 0      | 0      | 0      |
| Phyllobacterium    | 1              | 6              | 0      | 0      | 0      | 0      | 0      | 0      | 0      | 0      | 0      | 0      | 0      | 0      | 0      | 0      | 0      | 0      | 0      | 0      |
| Picrophilus        | 1              | 15             | 1      | 1      | 1      | 0      | 0      | 1      | 0      | 0      | 0      | 0      | 0      | 0      | 0      | 0      | 0      | 0      | 0      | 0      |
| Pirellula          | 2              | 85             | 0      | 1      | 0      | 0      | 0      | 1      | 0      | 0      | 0      | 0      | 0      | 0      | 0      | 0      | 0      | 0      | 0      | 0      |
| Planctomyces       | 2              | 93             | 0      | 1      | 0      | 0      | 0      | 1      | 0      | 0      | 0      | 0      | 0      | 0      | 0      | 0      | 0      | 0      | 1      | 0      |
| Plautia            | 1              | 17             | 0      | 1      | 0      | 0      | 0      | 0      | 0      | 0      | 0      | 0      | 0      | 0      | 0      | 0      | 0      | 0      | 0      | 0      |
| Plesiomonas        | 1              | 4              | 0      | 0      | 0      | 0      | 0      | 0      | 0      | 0      | 0      | 0      | 0      | 0      | 0      | 0      | 0      | 0      | 0      | 0      |
| Pleurocapsa        | 1              | 23             | 0      | 1      | 0      | 0      | 0      | 1      | 0      | 0      | 0      | 1      | 0      | 0      | 0      | 0      | 0      | 0      | 1      | 0      |
| Polaribacter       | 2              | 74             | 1      | 1      | 0      | 0      | 0      | 1      | 0      | 0      | 0      | 0      | 0      | 0      | 0      | 0      | 0      | 0      | 0      | 0      |
| Polaromonas        | 3              | 238            | 1      | 1      | 1      | 0      | 1      | 1      | 1      | 0      | 1      | 0      | 0      | 1      | 1      | 0      | 1      | 0      | 1      | 0      |
| Polymorphum        | 3              | 173            | 1      | 1      | 0      | 0      | 0      | 1      | 0      | 0      | 0      | 1      | 0      | 0      | 0      | 0      | 0      | 0      | 0      | 1      |
| Polynucleobacter   | 1              | 19             | 1      | 1      | 0      | 0      | 0      | 0      | 0      | 0      | 0      | 0      | 0      | 0      | 0      | 0      | 0      | 0      | 0      | 0      |
| Ponticaulis        | 1              | 1              | 0      | 0      | 0      | 0      | 0      | 0      | 0      | 0      | 0      | 0      | 0      | 0      | 0      | 0      | 0      | 0      | 0      | 0      |
| Porphyromonas      | 2              | 63             | 1      | 1      | 0      | 0      | 0      | 0      | 0      | 0      | 0      | 0      | 0      | 0      | 0      | 0      | 0      | 0      | 0      | 0      |
| Prevotella         | 1              | 65             | 0      | 1      | 0      | 0      | 0      | 0      | 0      | 0      | 0      | 0      | 0      | 0      | 0      | 0      | 0      | 0      | 0      | 0      |
| Prochlorococcus    | 2              | 68             | 0      | 1      | 0      | 0      | 0      | 1      | 0      | 0      | 0      | 0      | 0      | 0      | 0      | 0      | 0      | 0      | 0      | 0      |
| Propionibacterium  | 1              | 62             | 0      | 1      | 0      | 0      | 0      | 0      | 0      | 0      | 0      | 0      | 0      | 0      | 0      | 0      | 0      | 0      | 1      | 0      |
| Prosthecochloris   | 1              | 16             | 0      | 1      | 0      | 0      | 0      | 1      | 0      | 0      | 0      | 0      | 0      | 0      | 0      | 0      | 0      | 0      | 0      | 0      |
| Proteobacteria     | 1              | 19             | 0      | 0      | 0      | 0      | 0      | 0      | 0      | 0      | 0      | 0      | 1      | 0      | 0      | 0      | 0      | 0      | 0      | 0      |
| Proteus            | 2              | 113            | 0      | 1      | 0      | 0      | 0      | 0      | 0      | 0      | 0      | 0      | 0      | 0      | 0      | 0      | 0      | 0      | 0      | 0      |
| Providencia        | 1              | 38             | 1      | 1      | 0      | 0      | 0      | 0      | 0      | 0      | 0      | 1      | 0      | 0      | 0      | 0      | 0      | 0      | 0      | 0      |
| Pseudaminobacter   | 1              | 10             | 0      | 0      | 0      | 0      | 0      | 0      | 0      | 0      | 0      | 0      | 0      | 0      | 0      | 0      | 0      | 0      | 0      | 0      |
| Pseudanabaena      | 1              | 11             | 0      | 1      | 0      | 0      | 0      | 0      | 0      | 0      | 0      | 0      | 0      | 0      | 0      | 0      | 0      | 0      | 0      | 0      |
| Pseudoalteromonas  | 2              | 188            | 1      | 1      | 1      | 0      | 1      | 1      | 0      | 0      | 0      | 0      | 1      | 0      | 0      | 0      | 0      | 0      | 1      | 0      |
| Pseudochrobactrum  | 1              | 7              | 0      | 0      | 0      | 0      | 0      | 1      | 0      | 0      | 0      | 0      | 0      | 0      | 0      | 0      | 0      | 0      | 0      | 0      |
| Pseudogulbenkiania | 1              | 40             | 1      | 1      | 0      | 0      | 1      | 1      | 0      | 0      | 0      | 1      | 1      | 0      | 0      | 0      | 0      | 0      | 0      | 0      |
| pseudomallei       | 3              | 131            | 1      | 1      | 1      | 0      | 0      | 1      | 0      | 0      | 1      | 1      | 0      | 0      | 1      | 0      | 0      | 0      | 0      | 0      |

| Genus                   | Cluster Number | Protein Counts | K00074 | K00088 | K00100 | K00106 | K00114 | K00128 | K00129 | K00132 | K00141 | K00146 | K00148 | K00152 | K00155 | K00169 | K00217 | K00224 | K00274 | K00446 |
|-------------------------|----------------|----------------|--------|--------|--------|--------|--------|--------|--------|--------|--------|--------|--------|--------|--------|--------|--------|--------|--------|--------|
| Pseudomonas             | 3              | 381            | 1      | 1      | 1      | 0      | 1      | 1      | 0      | 0      | 1      | 1      | 1      | 1      | 1      | 0      | 1      | 0      | 1      | 1      |
| Pseudonocardia          | 3              | 180            | 1      | 1      | 0      | 0      | 1      | 0      | 0      | 0      | 0      | 1      | 1      | 0      | 0      | 0      | 0      | 0      | 0      | 1      |
| Pseudorhodobacter       | 1              | 4              | 0      | 1      | 0      | 0      | 0      | 0      | 0      | 0      | 0      | 0      | 0      | 0      | 0      | 0      | 0      | 0      | 0      | 0      |
| Pseudovibrio            | 1              | 33             | 1      | 1      | 0      | 0      | 0      | 0      | 0      | 0      | 0      | 0      | 0      | 0      | 0      | 0      | 0      | 0      | 0      | 0      |
| Pseudoxanthomonas       | 2              | 124            | 0      | 1      | 0      | 0      | 0      | 1      | 0      | 0      | 1      | 0      | 0      | 0      | 0      | 0      | 0      | 0      | 1      | 1      |
| Psychrobacter           | 2              | 124            | 1      | 1      | 0      | 0      | 0      | 1      | 0      | 0      | 0      | 0      | 0      | 0      | 0      | 0      | 0      | 0      | 1      | 0      |
| Psychroflexus           | 1              | 22             | 1      | 1      | 0      | 0      | 0      | 1      | 0      | 0      | 0      | 0      | 0      | 0      | 0      | 0      | 0      | 0      | 1      | 0      |
| Psychromonas            | 2              | 110            | 1      | 1      | 0      | 0      | 0      | 1      | 0      | 0      | 0      | 0      | 0      | 0      | 0      | 0      | 0      | 0      | 1      | 0      |
| Pusillimonas            | 3              | 111            | 1      | 1      | 0      | 0      | 0      | 1      | 0      | 0      | 0      | 0      | 0      | 0      | 0      | 0      | 0      | 0      | 0      | 0      |
| Pyrobaculum             | 1              | 15             | 0      | 0      | 1      | 0      | 0      | 1      | 0      | 0      | 0      | 0      | 0      | 0      | 0      | 1      | 0      | 0      | 0      | 0      |
| Pyrococcus              | 1              | 10             | 0      | 1      | 0      | 0      | 0      | 0      | 0      | 0      | 0      | 0      | 0      | 0      | 0      | 1      | 0      | 0      | 0      | 0      |
| Pyrolobus               | 1              | 4              | 0      | 0      | 0      | 0      | 0      | 0      | 0      | 0      | 0      | 0      | 0      | 0      | 0      | 1      | 0      | 0      | 0      | 0      |
| Rahnella                | 2              | 143            | 1      | 1      | 0      | 0      | 0      | 0      | 0      | 0      | 0      | 0      | 0      | 0      | 0      | 0      | 0      | 0      | 0      | 0      |
| Ralstonia               | 3              | 332            | 1      | 1      | 1      | 0      | 1      | 1      | 0      | 0      | 1      | 1      | 1      | 1      | 1      | 0      | 1      | 1      | 1      | 1      |
| Ramlibacter             | 1              | 35             | 1      | 1      | 0      | 0      | 0      | 1      | 0      | 0      | 0      | 0      | 0      | 0      | 0      | 0      | 0      | 0      | 0      | 0      |
| Raoultella              | 2              | 139            | 1      | 1      | 0      | 0      | 0      | 1      | 0      | 0      | 0      | 1      | 0      | 0      | 0      | 0      | 0      | 0      | 0      | 0      |
| Raphidiopsis            | 1              | 5              | 0      | 0      | 0      | 0      | 0      | 0      | 0      | 0      | 0      | 0      | 0      | 0      | 0      | 0      | 0      | 0      | 0      | 0      |
| Reinekea                | 1              | 2              | 0      | 0      | 0      | 0      | 0      | 0      | 0      | 0      | 0      | 0      | 0      | 0      | 0      | 0      | 0      | 0      | 0      | 0      |
| Renibacterium           | 2              | 67             | 1      | 1      | 0      | 0      | 0      | 1      | 0      | 0      | 0      | 0      | 0      | 0      | 0      | 0      | 0      | 0      | 0      | 0      |
| Rhizobiaceae            | 1              | 3              | 0      | 0      | 0      | 0      | 0      | 0      | 0      | 0      | 0      | 0      | 0      | 0      | 0      | 0      | 0      | 0      | 0      | 0      |
| Rhizobiales             | 1              | 6              | 0      | 0      | 0      | 0      | 0      | 0      | 0      | 0      | 0      | 0      | 0      | 0      | 0      | 0      | 0      | 0      | 0      | 0      |
| Rhizobium               | 3              | 257            | 1      | 1      | 1      | 0      | 1      | 1      | 0      | 0      | 0      | 0      | 1      | 0      | 1      | 0      | 1      | 0      | 1      | 1      |
| Rhizobium/Agrobacterium | 2              | 87             | 1      | 1      | 0      | 0      | 0      | 1      | 0      | 0      | 0      | 0      | 1      | 0      | 0      | 0      | 0      | 0      | 0      | 0      |
| Rhodanobacter           | 1              | 21             | 0      | 1      | 0      | 0      | 0      | 1      | 0      | 0      | 0      | 0      | 0      | 0      | 0      | 0      | 0      | 0      | 0      | 0      |
| Rhodobacter             | 3              | 175            | 1      | 1      | 1      | 0      | 1      | 1      | 0      | 0      | 0      | 0      | 0      | 0      | 1      | 0      | 0      | 0      | 0      | 1      |
| Rhodobacteraceae        | 1              | 21             | 0      | 0      | 0      | 0      | 0      | 1      | 0      | 0      | 0      | 0      | 0      | 0      | 0      | 0      | 0      | 0      | 0      | 0      |
| Rhodobacterales         | 1              | 34             | 0      | 1      | 0      | 0      | 0      | 1      | 0      | 0      | 0      | 0      | 0      | 0      | 0      | 0      | 0      | 0      | 0      | 0      |
| Rhodococcus             | 2              | 292            | 1      | 1      | 1      | 0      | 0      | 1      | 1      | 0      | 1      | 0      | 1      | 0      | 1      | 0      | 1      | 1      | 1      | 1      |
| Rhodocyclaceae          | 1              | 7              | 0      | 0      | 0      | 0      | 0      | 0      | 0      | 0      | 0      | 0      | 0      | 0      | 0      | 0      | 0      | 0      | 0      | 0      |
| Rhodoferax              | 3              | 144            | 1      | 1      | 0      | 0      | 0      | 1      | 0      | 0      | 0      | 0      | 0      | 0      | 0      | 1      | 0      | 0      | 0      | 0      |
| Rhodomicrobium          | 2              | 103            | 1      | 1      | 0      | 0      | 1      | 1      | 0      | 0      | 0      | 0      | 0      | 0      | 0      | 0      | 0      | 0      | 0      | 0      |
| Rhodopirellula          | 2              | 87             | 0      | 1      | 1      | 0      | 0      | 1      | 0      | 0      | 0      | 0      | 1      | 0      | 0      | 0      | 0      | 0      | 0      | 0      |
| Rhodopseudomonas        | 3              | 246            | 1      | 1      | 1      | 0      | 1      | 1      | 0      | 0      | 0      | 0      | 0      | 0      | 0      | 1      | 1      | 0      | 1      | 1      |
| Rhodospirillum          | 2              | 121            | 1      | 1      | 0      | 0      | 0      | 1      | 0      | 0      | 0      | 0      | 0      | 0      | 0      | 0      | 0      | 0      | 1      | 0      |
| Rhodothermus            | 2              | 76             | 1      | 1      | 0      | 0      | 0      | 1      | 0      | 0      | 0      | 0      | 0      | 0      | 0      | 1      | 0      | 0      | 0      | 0      |
| Rhodovulum              | 1              | 4              | 0      | 0      | 0      | 0      | 0      | 0      | 0      | 0      | 0      | 0      | 0      | 0      | 0      | 0      | 0      | 0      | 0      | 0      |
| Richelia                | 1              | 2              | 0      | 0      | 0      | 0      | 0      | 0      | 0      | 0      | 0      | 0      | 0      | 0      | 0      | 0      | 0      | 0      | 0      | 0      |
| Rickettsia              | 2              | 43             | 0      | 0      | 0      | 0      | 0      | 0      | 0      | 0      | 0      | 0      | 0      | 0      | 0      | 0      | 0      | 0      | 0      | 0      |
| Rickettsiaceae          | 1              | 5              | 0      | 0      | 0      | 0      | 0      | 0      | 0      | 0      | 0      | 0      | 0      | 0      | 0      | 0      | 0      | 0      | 0      | 0      |
| Riemerella              | 2              | 61             | 1      | 1      | 0      | 0      | 0      | 1      | 0      | 0      | 0      | 0      | 0      | 0      | 0      | 0      | 0      | 0      | 0      | 0      |
| Rivularia               | 1              | 18             | 0      | 1      | 0      | 0      | 0      | 0      | 0      | 0      | 0      | 0      | 0      | 0      | 0      | 0      | 0      | 0      | 1      | 0      |
| Robiginitalea           | 2              | 83             | 1      | 1      | 0      | 0      | 0      | 1      | 0      | 0      | 0      | 0      | 0      | 0      | 0      | 0      | 0      | 0      | 0      | 0      |
| Roseburia               | 2              | 58             | 1      | 1      | 0      | 0      | 0      | 0      | 0      | 0      | 0      | 0      | 0      | 0      | 0      | 1      | 0      | 0      | 0      | 0      |
| Roseibium               | 1              | 3              | 0      | 0      | 0      | 0      | 0      | 0      | 0      | 0      | 0      | 0      | 0      | 0      | 0      | 0      | 0      | 0      | 0      | 0      |
| Roseiflexus             | 3              | 100            | 0      | 1      | 0      | 0      | 0      | 1      | 0      | 0      | 0      | 0      | 0      | 0      | 0      | 0      | 0      | 0      | 1      | 1      |
| Roseobacter             | 2              | 149            | 1      | 1      | 1      | 0      | 0      | 1      | 0      | 0      | 0      | 0      | 0      | 0      | 1      | 0      | 0      | 0      | 1      | 0      |
| Roseomonas              | 1              | 2              | 0      | 0      | 0      | 0      | 0      | 0      | 0      | 0      | 0      | 0      | 0      | 0      | 0      | 0      | 0      | 0      | 0      | 0      |
| Roseovarius             | 1              | 15             | 0      | 0      | 0      | 0      | 0      | 0      | 0      | 0      | 0      | 0      | 0      | 0      | 0      | 0      | 0      | 0      | 0      | 0      |
| Rothia                  | 1              | 44             | 0      | 1      | 0      | 0      | 0      | 0      | 0      | 0      | 0      | 0      | 0      | 0      | 0      | 0      | 0      | 0      | 0      | 0      |
| Rubrivivax              | 1              | 24             | 1      | 1      | 0      | 0      | 0      | 1      | 0      | 0      | 0      | 0      | 0      | 0      | 0      | 1      | 0      | 0      | 0      | 0      |
| Rubrobacter             | 3              | 117            | 1      | 1      | 1      | 0      | 0      | 1      | 0      | 0      | 0      | 0      | 1      | 0      | 0      | 1      | 0      | 0      | 0      | 1      |
| Ruegeria                | 2              | 189            | 1      | 1      | 1      | 0      | 1      | 1      | 0      | 0      | 0      | 1      | 0      | 0      | 1      | 0      | 0      | 0      | 0      | 1      |

| Genus             | Cluster Number | Protein Counts | K00074 | K00088 | K00100 | K00106 | K00114 | K00128 | K00129 | K00132 | K00141 | K00146 | K00148 | K00152 | K00155 | K00169 | K00217 | K00224 | K00274 | K00446 |
|-------------------|----------------|----------------|--------|--------|--------|--------|--------|--------|--------|--------|--------|--------|--------|--------|--------|--------|--------|--------|--------|--------|
| Ruminococcaceae   | 1              | 2              | 0      | 0      | 0      | 0      | 0      | 0      | 0      | 0      | 0      | 0      | 0      | 0      | 0      | 0      | 0      | 0      | 0      | 0      |
| Ruminococcus      | 2              | 101            | 1      | 1      | 1      | 0      | 0      | 0      | 0      | 0      | 0      | 0      | 0      | 0      | 0      | 0      | 0      | 0      | 0      | 0      |
| Runella           | 1              | 26             | 1      | 1      | 0      | 0      | 0      | 1      | 0      | 0      | 0      | 0      | 0      | 0      | 0      | 0      | 0      | 0      | 0      | 1      |
| Saccharomonospora | 2              | 132            | 1      | 1      | 0      | 0      | 0      | 0      | 0      | 0      | 1      | 0      | 1      | 0      | 0      | 0      | 0      | 0      | 0      | 0      |
| Saccharophagus    | 2              | 81             | 0      | 1      | 0      | 0      | 0      | 0      | 0      | 0      | 0      | 0      | 0      | 0      | 0      | 0      | 0      | 0      | 0      | 0      |
| Saccharopolyspora | 3              | 194            | 1      | 1      | 1      | 0      | 1      | 1      | 0      | 0      | 1      | 1      | 1      | 0      | 0      | 0      | 0      | 0      | 1      | 0      |
| Saccharothrix     | 1              | 32             | 1      | 1      | 0      | 0      | 0      | 0      | 0      | 0      | 0      | 0      | 0      | 0      | 0      | 0      | 0      | 0      | 1      | 0      |
| Sagittula         | 1              | 10             | 0      | 0      | 0      | 0      | 0      | 0      | 0      | 0      | 0      | 0      | 0      | 0      | 0      | 0      | 0      | 0      | 0      | 1      |
| Salinibacter      | 2              | 77             | 1      | 1      | 1      | 0      | 0      | 1      | 0      | 0      | 0      | 0      | 0      | 0      | 0      | 0      | 0      | 0      | 1      | 0      |
| Salinimonas       | 1              | 1              | 0      | 0      | 0      | 0      | 0      | 0      | 0      | 0      | 0      | 0      | 0      | 0      | 0      | 0      | 0      | 0      | 0      | 0      |
| Salinispora       | 3              | 127            | 1      | 1      | 0      | 0      | 0      | 1      | 0      | 0      | 0      | 0      | 0      | 0      | 0      | 0      | 0      | 0      | 1      | 0      |
| Salinivibrio      | 1              | 2              | 0      | 0      | 0      | 0      | 0      | 0      | 0      | 0      | 0      | 0      | 0      | 0      | 0      | 0      | 0      | 0      | 0      | 0      |
| Salmonella        | 2              | 151            | 0      | 1      | 1      | 0      | 0      | 0      | 0      | 0      | 0      | 1      | 0      | 0      | 0      | 0      | 0      | 0      | 0      | 0      |
| Sanguibacter      | 2              | 73             | 0      | 1      | 0      | 0      | 0      | 1      | 0      | 0      | 0      | 0      | 0      | 0      | 0      | 0      | 0      | 0      | 0      | 0      |
| Saprospira        | 1              | 13             | 1      | 1      | 0      | 0      | 0      | 0      | 0      | 0      | 0      | 0      | 0      | 0      | 0      | 0      | 0      | 0      | 0      | 0      |
| Scardovia         | 1              | 1              | 0      | 0      | 0      | 0      | 0      | 0      | 0      | 0      | 0      | 0      | 0      | 0      | 0      | 0      | 0      | 0      | 0      | 0      |
| Scytonema         | 1              | 10             | 0      | 0      | 0      | 0      | 0      | 0      | 0      | 0      | 0      | 0      | 0      | 0      | 0      | 0      | 0      | 0      | 0      | 0      |
| Sebaldella        | 2              | 69             | 0      | 1      | 1      | 0      | 0      | 0      | 0      | 0      | 0      | 0      | 0      | 0      | 0      | 0      | 0      | 0      | 0      | 0      |
| Segniliparus      | 2              | 85             | 1      | 1      | 0      | 0      | 0      | 1      | 0      | 0      | 0      | 0      | 0      | 0      | 0      | 0      | 0      | 0      | 0      | 0      |
| Selenomonas       | 2              | 57             | 0      | 1      | 1      | 0      | 0      | 0      | 0      | 0      | 0      | 0      | 0      | 0      | 0      | 0      | 0      | 0      | 0      | 0      |
| Serinicoccus      | 1              | 1              | 0      | 0      | 0      | 0      | 0      | 0      | 0      | 0      | 0      | 0      | 0      | 0      | 0      | 0      | 0      | 0      | 0      | 0      |
| Serratia          | 2              | 186            | 1      | 1      | 0      | 0      | 0      | 1      | 0      | 0      | 0      | 1      | 1      | 0      | 0      | 0      | 0      | 0      | 0      | 0      |
| Shewanella        | 3              | 214            | 0      | 1      | 1      | 0      | 1      | 1      | 0      | 0      | 0      | 0      | 0      | 0      | 0      | 0      | 0      | 1      | 0      | 0      |
| Shigella          | 2              | 172            | 1      | 1      | 1      | 0      | 0      | 0      | 0      | 0      | 0      | 1      | 0      | 0      | 0      | 0      | 0      | 0      | 0      | 0      |
| Shinella          | 1              | 2              | 0      | 0      | 0      | 0      | 0      | 0      | 0      | 0      | 0      | 0      | 0      | 0      | 0      | 0      | 0      | 0      | 0      | 0      |
| Sideroxydans      | 2              | 81             | 0      | 1      | 0      | 0      | 0      | 0      | 0      | 0      | 0      | 0      | 0      | 0      | 0      | 0      | 0      | 0      | 0      | 0      |
| Silicibacter      | 2              | 105            | 1      | 0      | 0      | 0      | 0      | 1      | 0      | 0      | 0      | 0      | 0      | 0      | 1      | 0      | 0      | 0      | 0      | 1      |
| Simiduia          | 1              | 18             | 0      | 1      | 0      | 0      | 0      | 0      | 0      | 0      | 0      | 0      | 0      | 0      | 0      | 0      | 0      | 0      | 1      | 0      |
| Simkania          | 1              | 6              | 0      | 1      | 0      | 0      | 0      | 0      | 0      | 0      | 0      | 0      | 0      | 0      | 0      | 0      | 0      | 0      | 0      | 0      |
| Simonsiella       | 1              | 2              | 0      | 0      | 0      | 0      | 0      | 0      | 0      | 0      | 0      | 0      | 0      | 0      | 0      | 0      | 0      | 0      | 0      | 0      |
| Singulisphaera    | 1              | 18             | 0      | 1      | 0      | 1      | 0      | 0      | 0      | 0      | 0      | 0      | 0      | 0      | 0      | 0      | 0      | 0      | 1      | 0      |
| Sinorhizobium     | 3              | 207            | 1      | 1      | 1      | 0      | 1      | 1      | 0      | 0      | 0      | 1      | 1      | 0      | 1      | 0      | 0      | 0      | 1      | 1      |
| Slackia           | 2              | 46             | 1      | 1      | 0      | 0      | 0      | 1      | 0      | 0      | 0      | 0      | 0      | 0      | 0      | 0      | 0      | 0      | 0      | 0      |
| Smaragdicoccus    | 1              | 3              | 0      | 0      | 0      | 0      | 0      | 0      | 0      | 0      | 0      | 0      | 0      | 0      | 0      | 0      | 0      | 0      | 0      | 0      |
| Sodalis           | 2              | 71             | 0      | 1      | 0      | 0      | 0      | 0      | 0      | 0      | 0      | 0      | 0      | 0      | 0      | 0      | 0      | 0      | 0      | 0      |
| Solibacillus      | 1              | 23             | 1      | 1      | 0      | 0      | 0      | 1      | 0      | 0      | 0      | 0      | 0      | 0      | 0      | 0      | 0      | 0      | 0      | 1      |
| Solitaea          | 1              | 13             | 1      | 1      | 0      | 0      | 0      | 0      | 0      | 0      | 0      | 0      | 0      | 0      | 0      | 0      | 0      | 0      | 1      | 0      |
| Sorangium         | 3              | 115            | 1      | 1      | 0      | 0      | 0      | 1      | 0      | 0      | 0      | 0      | 0      | 0      | 0      | 0      | 0      | 0      | 1      | 0      |
| Sphaerobacter     | 2              | 100            | 1      | 1      | 0      | 0      | 0      | 1      | 0      | 0      | 0      | 0      | 1      | 0      | 0      | 0      | 0      | 0      | 0      | 1      |
| Sphaerochaeta     | 1              | 42             | 0      | 1      | 0      | 0      | 0      | 1      | 0      | 0      | 0      | 0      | 0      | 0      | 0      | 0      | 0      | 0      | 0      | 0      |
| Sphingobacterium  | 3              | 85             | 1      | 1      | 0      | 0      | 0      | 1      | 0      | 0      | 0      | 0      | 0      | 0      | 0      | 0      | 0      | 0      | 0      | 0      |
| Sphingobium       | 1              | 179            | 1      | 1      | 0      | 0      | 1      | 1      | 0      | 0      | 0      | 1      | 1      | 0      | 0      | 0      | 0      | 0      | 1      | 1      |
| Sphingomonadaceae | 1              | 15             | 0      | 0      | 0      | 0      | 0      | 1      | 0      | 0      | 0      | 0      | 0      | 0      | 0      | 0      | 0      | 0      | 0      | 0      |
| Sphingomonas      | 2              | 220            | 1      | 1      | 0      | 0      | 1      | 1      | 0      | 0      | 0      | 1      | 0      | 0      | 0      | 0      | 0      | 0      | 0      | 0      |
| Sphingopyxis      | 3              | 99             | 1      | 1      | 1      | 0      | 1      | 1      | 0      | 0      | 0      | 0      | 0      | 0      | 0      | 0      | 0      | 0      | 0      | 0      |
| Spirochaeta       | 2              | 103            | 0      | 1      | 1      | 0      | 0      | 1      | 0      | 0      | 0      | 0      | 0      | 0      | 0      | 0      | 0      | 0      | 0      | 0      |
| Spiroplasma       | 1              | 6              | 0      | 1      | 0      | 0      | 0      | 0      | 0      | 0      | 0      | 0      | 0      | 0      | 0      | 0      | 0      | 0      | 0      | 0      |
| Spirosoma         | 2              | 107            | 1      | 1      | 0      | 0      | 0      | 1      | 0      | 0      | 0      | 0      | 1      | 0      | 0      | 0      | 0      | 0      | 1      | 1      |
| Stackebrandtia    | 2              | 110            | 1      | 1      | 0      | 0      | 0      | 1      | 0      | 0      | 0      | 0      | 0      | 0      | 0      | 0      | 0      | 0      | 1      | 0      |
| Stanieria         | 1              | 17             | 0      | 1      | 0      | 0      | 0      | 0      | 0      | 0      | 0      | 0      | 0      | 0      | 0      | 0      | 0      | 0      | 0      | 0      |
| Staphylococcus    | 2              | 108            | 1      | 1      | 0      | 0      | 0      | 1      | 0      | 0      | 0      | 0      | 0      | 0      | 0      | 0      | 0      | 0      | 0      | 0      |
| Staphylothermus   | 1              | 12             | 0      | 0      | 0      | 0      | 0      | 0      | 0      | 0      | 0      | 0      | 0      | 0      | 0      | 1      | 0      | 0      | 0      | 0      |

| Genus                  | Cluster Number | Protein Counts | K00074 | K00088 | K00100 | K00106 | K00114 | K00128 | K00129 | K00132 | K00141 | K00146 | K00148 | K00152 | K00155 | K00169 | K00217 | K00224 | K00274 | K00446 |
|------------------------|----------------|----------------|--------|--------|--------|--------|--------|--------|--------|--------|--------|--------|--------|--------|--------|--------|--------|--------|--------|--------|
| Stappia                | 1              | 2              | 0      | 0      | 0      | 0      | 0      | 0      | 0      | 0      | 0      | 0      | 0      | 0      | 0      | 0      | 0      | 0      | 0      | 0      |
| Starkeya               | 3              | 134            | 1      | 1      | 0      | 0      | 0      | 1      | 0      | 0      | 0      | 0      | 0      | 0      | 0      | 0      | 0      | 0      | 1      | 0      |
| Stenotrophomonas       | 3              | 104            | 0      | 1      | 0      | 0      | 0      | 1      | 0      | 0      | 1      | 0      | 0      | 0      | 0      | 0      | 0      | 0      | 0      | 0      |
| Stigmatella            | 3              | 129            | 1      | 1      | 0      | 0      | 0      | 1      | 0      | 0      | 0      | 0      | 0      | 0      | 0      | 0      | 0      | 0      | 1      | 0      |
| Streptobacillus        | 1              | 38             | 0      | 1      | 0      | 0      | 0      | 0      | 0      | 0      | 0      | 0      | 0      | 0      | 0      | 0      | 0      | 0      | 0      | 0      |
| Streptococcus          | 2              | 121            | 1      | 1      | 1      | 0      | 0      | 0      | 0      | 0      | 0      | 0      | 0      | 0      | 0      | 0      | 0      | 0      | 0      | 0      |
| Streptomyces           | 2              | 253            | 1      | 1      | 1      | 0      | 1      | 1      | 0      | 0      | 1      | 1      | 1      | 0      | 0      | 0      | 0      | 0      | 1      | 1      |
| Streptosporangium      | 3              | 148            | 1      | 1      | 0      | 0      | 0      | 1      | 0      | 0      | 0      | 0      | 1      | 0      | 0      | 0      | 0      | 0      | 1      | 0      |
| Strigomonas            | 1              | 2              | 0      | 1      | 0      | 0      | 0      | 0      | 0      | 0      | 0      | 0      | 0      | 0      | 0      | 0      | 0      | 0      | 0      | 0      |
| Sulfitobacter          | 1              | 10             | 0      | 1      | 0      | 0      | 0      | 0      | 0      | 0      | 0      | 0      | 0      | 0      | 0      | 0      | 0      | 0      | 0      | 0      |
| Sulfobacillus          | 1              | 30             | 1      | 1      | 0      | 0      | 0      | 1      | 0      | 0      | 0      | 0      | 1      | 0      | 0      | 0      | 0      | 0      | 0      | 1      |
| Sulfolobus             | 1              | 23             | 1      | 0      | 0      | 0      | 0      | 1      | 0      | 0      | 0      | 0      | 0      | 0      | 0      | 1      | 1      | 0      | 0      | 1      |
| Sulfuricurvum          | 2              | 67             | 0      | 1      | 1      | 0      | 0      | 0      | 0      | 0      | 0      | 0      | 0      | 0      | 0      | 1      | 0      | 0      | 0      | 0      |
| Sulfurihydrogenibium   | 2              | 55             | 0      | 1      | 1      | 0      | 0      | 0      | 0      | 0      | 0      | 0      | 0      | 0      | 0      | 1      | 0      | 0      | 0      | 0      |
| Sulfurimonas           | 2              | 60             | 0      | 1      | 0      | 0      | 0      | 0      | 0      | 0      | 0      | 0      | 0      | 0      | 0      | 1      | 0      | 0      | 0      | 0      |
| Sulfurospirillum       | 1              | 48             | 0      | 1      | 1      | 0      | 0      | 1      | 0      | 0      | 0      | 0      | 0      | 0      | 0      | 0      | 0      | 0      | 0      | 0      |
| Sulfurovum             | 2              | 48             | 0      | 1      | 0      | 0      | 0      | 0      | 0      | 0      | 0      | 0      | 0      | 0      | 0      | 1      | 0      | 0      | 0      | 0      |
| Symbiobacterium        | 2              | 68             | 1      | 1      | 1      | 0      | 0      | 0      | 0      | 0      | 0      | 0      | 0      | 0      | 0      | 1      | 0      | 0      | 0      | 0      |
| Synechococcus          | 1              | 34             | 0      | 1      | 1      | 0      | 0      | 1      | 0      | 0      | 0      | 0      | 0      | 0      | 0      | 0      | 0      | 0      | 1      | 0      |
| Synechocystis          | 1              | 40             | 0      | 1      | 0      | 0      | 0      | 1      | 0      | 0      | 0      | 0      | 0      | 0      | 0      | 0      | 0      | 0      | 1      | 0      |
| Synergistetes          | 1              | 27             | 0      | 1      | 0      | 0      | 0      | 0      | 0      | 0      | 0      | 0      | 0      | 0      | 0      | 0      | 0      | 0      | 0      | 0      |
| Syntrophobacter        | 2              | 101            | 1      | 1      | 0      | 0      | 0      | 0      | 0      | 0      | 0      | 0      | 0      | 0      | 0      | 1      | 0      | 0      | 0      | 0      |
| Syntrophobotulus       | 2              | 71             | 0      | 1      | 0      | 0      | 0      | 1      | 0      | 0      | 0      | 0      | 0      | 0      | 0      | 0      | 0      | 0      | 1      | 0      |
| Syntrophomonas         | 2              | 58             | 1      | 1      | 1      | 0      | 0      | 0      | 0      | 0      | 0      | 0      | 0      | 0      | 0      | 1      | 0      | 0      | 0      | 0      |
| Syntrophothermus       | 2              | 60             | 1      | 1      | 0      | 0      | 0      | 0      | 0      | 0      | 0      | 0      | 0      | 0      | 0      | 0      | 0      | 0      | 0      | 0      |
| Syntrophus             | 2              | 66             | 1      | 1      | 1      | 0      | 0      | 1      | 0      | 0      | 0      | 0      | 0      | 0      | 0      | 1      | 0      | 1      | 0      | 0      |
| Tannerella             | 1              | 8              | 0      | 1      | 0      | 0      | 0      | 0      | 0      | 0      | 0      | 0      | 0      | 0      | 0      | 0      | 0      | 0      | 0      | 0      |
| Taylorella             | 1              | 43             | 0      | 1      | 0      | 0      | 0      | 1      | 0      | 0      | 0      | 0      | 0      | 0      | 0      | 0      | 0      | 0      | 0      | 0      |
| Tepidanaerobacter      | 2              | 55             | 1      | 1      | 0      | 0      | 0      | 0      | 0      | 0      | 0      | 0      | 0      | 0      | 0      | 1      | 0      | 0      | 0      | 0      |
| Teredinibacter         | 2              | 109            | 0      | 1      | 0      | 0      | 0      | 0      | 0      | 0      | 0      | 0      | 0      | 0      | 0      | 0      | 0      | 0      | 1      | 0      |
| Terrabacter            | 1              | 1              | 0      | 0      | 0      | 0      | 0      | 0      | 0      | 0      | 0      | 0      | 0      | 0      | 0      | 0      | 0      | 0      | 0      | 0      |
| Terriglobus            | 2              | 83             | 1      | 1      | 0      | 0      | 1      | 0      | 0      | 0      | 0      | 0      | 1      | 0      | 0      | 0      | 0      | 0      | 1      | 0      |
| Tetragenococcus        | 1              | 12             | 0      | 1      | 1      | 0      | 0      | 0      | 0      | 0      | 0      | 0      | 0      | 0      | 0      | 0      | 0      | 0      | 0      | 0      |
| Thalassiobium          | 1              | 11             | 0      | 0      | 0      | 0      | 0      | 0      | 0      | 0      | 0      | 0      | 0      | 0      | 0      | 0      | 0      | 0      | 0      | 1      |
| Thalassobacter         | 1              | 9              | 0      | 0      | 0      | 0      | 0      | 0      | 0      | 0      | 0      | 0      | 0      | 0      | 0      | 0      | 0      | 0      | 0      | 0      |
| Thalassolituus         | 1              | 12             | 0      | 1      | 0      | 0      | 0      | 0      | 0      | 0      | 0      | 0      | 0      | 0      | 0      | 0      | 0      | 0      | 0      | 0      |
| Thalassospira          | 1              | 2              | 0      | 0      | 0      | 0      | 0      | 0      | 0      | 0      | 0      | 0      | 0      | 0      | 0      | 0      | 0      | 0      | 0      | 0      |
| Thauera                | 1              | 111            | 1      | 1      | 0      | 0      | 1      | 1      | 0      | 0      | 0      | 1      | 0      | 0      | 0      | 1      | 0      | 0      | 0      | 1      |
| Thermacetogenium       | 1              | 7              | 0      | 1      | 0      | 0      | 0      | 0      | 0      | 0      | 0      | 0      | 0      | 0      | 0      | 0      | 0      | 0      | 0      | 0      |
| Thermaerobacter        | 2              | 79             | 1      | 1      | 0      | 0      | 0      | 1      | 0      | 0      | 0      | 1      | 0      | 0      | 0      | 0      | 0      | 0      | 0      | 1      |
| Thermanaerovibrio      | 2              | 58             | 0      | 1      | 0      | 0      | 0      | 0      | 0      | 0      | 0      | 0      | 0      | 0      | 0      | 0      | 0      | 0      | 0      | 0      |
| Thermincola            | 2              | 62             | 1      | 1      | 0      | 0      | 0      | 0      | 0      | 0      | 0      | 0      | 0      | 0      | 0      | 0      | 0      | 0      | 0      | 0      |
| Thermoanaerobacter     | 2              | 76             | 1      | 1      | 1      | 0      | 0      | 0      | 0      | 0      | 0      | 0      | 0      | 0      | 0      | 0      | 0      | 0      | 0      | 0      |
| Thermoanaerobacterium  | 2              | 64             | 1      | 1      | 1      | 0      | 0      | 0      | 0      | 0      | 0      | 0      | 0      | 0      | 0      | 0      | 0      | 0      | 0      | 0      |
| Thermobacillus         | 1              | 11             | 1      | 1      | 0      | 0      | 0      | 1      | 0      | 0      | 0      | 0      | 0      | 0      | 0      | 1      | 0      | 0      | 0      | 0      |
| Thermobaculum          | 2              | 62             | 1      | 1      | 0      | 0      | 0      | 1      | 0      | 0      | 0      | 0      | 0      | 0      | 0      | 0      | 0      | 0      | 0      | 0      |
| Thermobifida           | 2              | 72             | 1      | 1      | 0      | 0      | 0      | 1      | 0      | 0      | 0      | 0      | 1      | 0      | 0      | 0      | 0      | 0      | 0      | 0      |
| Thermobispora          | 2              | 109            | 0      | 1      | 0      | 0      | 0      | 1      | 0      | 0      | 0      | 0      | 0      | 0      | 0      | 0      | 0      | 0      | 0      | 0      |
| Thermococcus           | 1              | 13             | 0      | 1      | 0      | 0      | 0      | 0      | 0      | 0      | 0      | 0      | 0      | 0      | 0      | 1      | 0      | 0      | 0      | 0      |
| Thermocrinis           | 2              | 60             | 0      | 1      | 0      | 0      | 0      | 0      | 0      | 0      | 0      | 0      | 0      | 0      | 0      | 1      | 0      | 0      | 0      | 0      |
| Thermodesulfator       | 1              | 10             | 0      | 1      | 0      | 0      | 0      | 0      | 0      | 0      | 0      | 0      | 0      | 0      | 0      | 1      | 0      | 0      | 0      | 0      |
| Thermodesulfobacterium | 1              | 9              | 0      | 1      | 1      | 0      | 0      | 0      | 0      | 0      | 0      | 0      | 0      | 0      | 0      | 1      | 0      | 0      | 0      | 0      |

| Genus                | Cluster Number | Protein Counts | K00074 | K00088 | K00100 | K00106 | K00114 | K00128 | K00129 | K00132 | K00141 | K00146 | K00148 | K00152 | K00155 | K00169 | K00217 | K00224 | K00274 | K00446 |
|----------------------|----------------|----------------|--------|--------|--------|--------|--------|--------|--------|--------|--------|--------|--------|--------|--------|--------|--------|--------|--------|--------|
| Thermodesulfobium    | 1              | 13             | 0      | 1      | 1      | 0      | 0      | 0      | 0      | 0      | 0      | 0      | 0      | 0      | 0      | 1      | 0      | 0      | 0      | 0      |
| Thermodesulfovibrio  | 2              | 60             | 0      | 1      | 1      | 0      | 0      | 0      | 0      | 0      | 0      | 0      | 0      | 0      | 0      | 1      | 0      | 0      | 0      | 0      |
| Thermofilum          | 1              | 9              | 0      | 1      | 1      | 0      | 0      | 0      | 0      | 0      | 0      | 0      | 0      | 0      | 0      | 1      | 0      | 0      | 0      | 0      |
| Thermogladus         | 1              | 7              | 0      | 0      | 0      | 0      | 0      | 0      | 0      | 0      | 0      | 0      | 0      | 0      | 0      | 1      | 0      | 0      | 0      | 0      |
| Thermomicrobium      | 2              | 92             | 0      | 1      | 0      | 0      | 0      | 1      | 0      | 0      | 0      | 0      | 0      | 0      | 0      | 0      | 0      | 0      | 0      | 1      |
| Thermomonospora      | 2              | 125            | 1      | 1      | 0      | 0      | 0      | 1      | 0      | 0      | 0      | 0      | 0      | 0      | 0      | 0      | 0      | 0      | 1      | 1      |
| Thermoplasma         | 1              | 11             | 1      | 1      | 0      | 0      | 0      | 1      | 0      | 0      | 0      | 0      | 0      | 0      | 1      | 1      | 0      | 0      | 0      | 0      |
| Thermoplasmatales    | 1              | 6              | 0      | 1      | 0      | 0      | 0      | 0      | 0      | 0      | 0      | 0      | 0      | 0      | 0      | 1      | 0      | 0      | 0      | 0      |
| Thermoproteus        | 1              | 12             | 0      | 0      | 0      | 0      | 0      | 0      | 0      | 0      | 0      | 0      | 0      | 0      | 0      | 1      | 0      | 0      | 0      | 0      |
| Thermosediminibacter | 2              | 64             | 0      | 1      | 0      | 0      | 0      | 0      | 0      | 0      | 0      | 0      | 0      | 0      | 0      | 1      | 0      | 0      | 1      | 0      |
| Thermosipho          | 2              | 70             | 0      | 1      | 1      | 0      | 0      | 0      | 0      | 0      | 0      | 0      | 0      | 0      | 0      | 1      | 0      | 0      | 0      | 0      |
| Thermosphaera        | 1              | 10             | 0      | 0      | 0      | 0      | 0      | 0      | 0      | 0      | 0      | 0      | 0      | 0      | 0      | 1      | 0      | 0      | 0      | 0      |
| Thermosynechococcus  | 1              | 6              | 0      | 1      | 0      | 0      | 0      | 0      | 0      | 0      | 0      | 0      | 0      | 0      | 0      | 0      | 0      | 0      | 0      | 0      |
| Thermotoga           | 2              | 80             | 0      | 1      | 1      | 0      | 0      | 0      | 0      | 0      | 0      | 0      | 0      | 0      | 0      | 1      | 0      | 0      | 0      | 0      |
| Thermovibrio         | 2              | 58             | 0      | 1      | 0      | 0      | 0      | 0      | 0      | 0      | 0      | 0      | 0      | 0      | 0      | 1      | 0      | 0      | 0      | 0      |
| Thermovirga          | 1              | 9              | 0      | 1      | 0      | 0      | 0      | 0      | 0      | 0      | 0      | 0      | 0      | 0      | 0      | 1      | 0      | 0      | 0      | 0      |
| Thermus              | 2              | 107            | 1      | 1      | 1      | 0      | 0      | 1      | 0      | 0      | 0      | 0      | 0      | 0      | 0      | 0      | 0      | 0      | 0      | 1      |
| Thioalkalimicrobium  | 1              | 4              | 0      | 1      | 0      | 0      | 0      | 0      | 0      | 0      | 0      | 0      | 0      | 0      | 0      | 0      | 0      | 0      | 0      | 0      |
| Thioalkalivibrio     | 2              | 91             | 0      | 1      | 0      | 0      | 0      | 0      | 0      | 0      | 0      | 0      | 0      | 0      | 0      | 1      | 0      | 0      | 0      | 0      |
| Thiobaca             | 1              | 2              | 0      | 0      | 0      | 0      | 0      | 0      | 0      | 0      | 0      | 0      | 0      | 0      | 0      | 0      | 0      | 0      | 0      | 0      |
| Thiobacillus         | 2              | 67             | 0      | 1      | 1      | 0      | 0      | 0      | 0      | 0      | 0      | 0      | 0      | 0      | 0      | 0      | 0      | 0      | 0      | 0      |
| Thiocapsa            | 1              | 2              | 0      | 0      | 0      | 0      | 0      | 0      | 0      | 0      | 0      | 0      | 0      | 0      | 0      | 0      | 0      | 0      | 0      | 0      |
| Thiocystis           | 1              | 11             | 0      | 1      | 0      | 0      | 0      | 0      | 0      | 0      | 0      | 0      | 0      | 0      | 0      | 0      | 0      | 0      | 0      | 0      |
| Thioflavococcus      | 1              | 13             | 0      | 1      | 0      | 0      | 0      | 0      | 0      | 0      | 0      | 0      | 0      | 0      | 0      | 0      | 0      | 0      | 0      | 0      |
| Thiomicrospira       | 2              | 50             | 0      | 1      | 0      | 0      | 0      | 0      | 0      | 0      | 0      | 0      | 0      | 0      | 0      | 0      | 0      | 0      | 0      | 0      |
| Thiomonas            | 2              | 85             | 1      | 1      | 0      | 0      | 1      | 0      | 0      | 0      | 0      | 0      | 0      | 0      | 0      | 0      | 0      | 0      | 0      | 0      |
| Thiorhodococcus      | 1              | 2              | 0      | 0      | 0      | 0      | 0      | 0      | 0      | 0      | 0      | 0      | 0      | 0      | 0      | 0      | 0      | 0      | 0      | 0      |
| Thiothrix            | 1              | 2              | 0      | 0      | 0      | 0      | 0      | 1      | 0      | 0      | 0      | 0      | 0      | 0      | 0      | 0      | 0      | 0      | 0      | 0      |
| Tistrella            | 1              | 42             | 1      | 1      | 0      | 0      | 0      | 0      | 0      | 0      | 0      | 0      | 0      | 0      | 0      | 0      | 0      | 0      | 0      | 0      |
| Tolumonas            | 2              | 100            | 0      | 1      | 1      | 0      | 0      | 0      | 0      | 0      | 0      | 0      | 0      | 0      | 0      | 0      | 0      | 0      | 0      | 0      |
| Transposon           | 1              | 2              | 0      | 0      | 0      | 0      | 0      | 0      | 0      | 0      | 0      | 0      | 0      | 0      | 0      | 0      | 0      | 0      | 0      | 0      |
| Treponema            | 1              | 63             | 1      | 1      | 1      | 0      | 0      | 1      | 0      | 0      | 0      | 0      | 0      | 0      | 0      | 0      | 0      | 0      | 0      | 1      |
| Trichodesmium        | 2              | 71             | 0      | 1      | 0      | 0      | 0      | 1      | 0      | 0      | 0      | 0      | 0      | 0      | 0      | 0      | 0      | 0      | 1      | 0      |
| Trichormus           | 1              | 12             | 0      | 1      | 0      | 0      | 0      | 1      | 0      | 0      | 0      | 0      | 0      | 0      | 0      | 0      | 0      | 0      | 0      | 0      |
| Tropheryma           | 2              | 22             | 0      | 1      | 1      | 0      | 0      | 0      | 0      | 0      | 0      | 0      | 0      | 0      | 0      | 0      | 0      | 0      | 0      | 0      |
| Truepera             | 2              | 104            | 1      | 1      | 0      | 0      | 0      | 1      | 0      | 0      | 0      | 0      | 0      | 0      | 0      | 0      | 0      | 0      | 1      | 0      |
| Tsukamurella         | 2              | 123            | 1      | 1      | 0      | 0      | 0      | 1      | 0      | 0      | 0      | 0      | 0      | 0      | 0      | 0      | 0      | 0      | 1      | 0      |
| Turneriella          | 1              | 16             | 1      | 1      | 0      | 0      | 0      | 0      | 0      | 0      | 0      | 0      | 0      | 0      | 0      | 0      | 0      | 0      | 1      | 0      |
| Uliginosibacterium   | 1              | 2              | 0      | 0      | 0      | 0      | 0      | 0      | 0      | 0      | 0      | 0      | 0      | 0      | 0      | 0      | 0      | 0      | 0      | 0      |
| Ureaplasma           | 1              | 24             | 0      | 0      | 0      | 0      | 0      | 0      | 0      | 0      | 0      | 0      | 0      | 0      | 0      | 0      | 0      | 0      | 0      | 0      |
| Ureibacillus         | 1              | 2              | 0      | 0      | 0      | 0      | 0      | 0      | 0      | 0      | 0      | 0      | 0      | 0      | 0      | 0      | 0      | 0      | 0      | 0      |
| Variovorax           | 3              | 187            | 1      | 1      | 1      | 0      | 1      | 1      | 0      | 0      | 0      | 1      | 0      | 0      | 0      | 0      | 0      | 0      | 0      | 0      |
| Veillonella          | 1              | 54             | 0      | 1      | 0      | 0      | 0      | 0      | 0      | 0      | 0      | 0      | 0      | 0      | 0      | 0      | 0      | 0      | 0      | 0      |
| Verminephrobacter    | 3              | 188            | 1      | 1      | 1      | 0      | 1      | 1      | 0      | 0      | 0      | 0      | 1      | 0      | 1      | 0      | 1      | 0      | 1      | 1      |
| Verrucosispora       | 3              | 126            | 1      | 1      | 0      | 0      | 0      | 1      | 0      | 0      | 1      | 0      | 1      | 0      | 0      | 0      | 0      | 0      | 1      | 0      |
| Vibrio               | 2              | 195            | 0      | 1      | 1      | 0      | 0      | 1      | 0      | 0      | 0      | 0      | 1      | 0      | 0      | 0      | 0      | 0      | 1      | 0      |
| Vibrionales          | 1              | 46             | 0      | 1      | 0      | 0      | 0      | 0      | 0      | 0      | 0      | 0      | 0      | 0      | 0      | 0      | 0      | 0      | 0      | 0      |
| Vitreoscilla         | 1              | 1              | 0      | 0      | 0      | 0      | 0      | 0      | 0      | 0      | 0      | 0      | 0      | 0      | 0      | 0      | 0      | 0      | 0      | 0      |
| Vulcanisaeta         | 1              | 14             | 1      | 0      | 0      | 0      | 0      | 1      | 0      | 0      | 0      | 0      | 0      | 0      | 0      | 1      | 0      | 0      | 0      | 0      |
| Waddlia              | 2              | 68             | 0      | 1      | 0      | 0      | 0      | 0      | 0      | 0      | 0      | 0      | 0      | 0      | 0      | 0      | 0      | 0      | 0      | 0      |
| Wautersia            | 1              | 2              | 0      | 0      | 0      | 0      | 0      | 0      | 0      | 0      | 0      | 0      | 0      | 0      | 0      | 0      | 0      | 0      | 0      | 0      |
| Weeksella            | 2              | 65             | 1      | 1      | 0      | 0      | 0      | 1      | 0      | 0      | 0      | 0      | 0      | 0      | 0      | 0      | 0      | 0      | 0      | 0      |



| Genus             | Cluster Number | Protein Counts | K00074 | K00088 | K00100 | K00106 | K00114 | K00128 | K00129 | K00132 | K00141 | K00146 | K00148 | K00152 | K00155 | K00169 | K00217 | K00224 | K00274 | K00446 |
|-------------------|----------------|----------------|--------|--------|--------|--------|--------|--------|--------|--------|--------|--------|--------|--------|--------|--------|--------|--------|--------|--------|
| Weissella         | 1              | 14             | 0      | 0      | 0      | 0      | 0      | 0      | 0      | 0      | 0      | 0      | 0      | 0      | 0      | 0      | 0      | 0      | 0      | 0      |
| Wenxinia          | 1              | 2              | 0      | 0      | 0      | 0      | 0      | 0      | 0      | 0      | 0      | 0      | 0      | 0      | 0      | 0      | 0      | 0      | 0      | 0      |
| Wigglesworthia    | 1              | 29             | 0      | 1      | 0      | 0      | 0      | 0      | 0      | 0      | 0      | 0      | 0      | 0      | 0      | 0      | 0      | 0      | 0      | 0      |
| Wolbachia         | 1              | 32             | 0      | 1      | 0      | 0      | 0      | 0      | 0      | 0      | 0      | 0      | 0      | 0      | 0      | 0      | 0      | 0      | 0      | 0      |
| Wolinella         | 2              | 51             | 0      | 1      | 1      | 0      | 0      | 0      | 0      | 0      | 0      | 0      | 0      | 0      | 0      | 1      | 0      | 1      | 0      | 0      |
| Xanthobacter      | 3              | 176            | 1      | 1      | 0      | 0      | 1      | 1      | 0      | 0      | 0      | 0      | 0      | 0      | 0      | 0      | 0      | 0      | 1      | 0      |
| Xanthobacteraceae | 1              | 4              | 0      | 0      | 0      | 0      | 0      | 0      | 0      | 0      | 0      | 0      | 0      | 0      | 0      | 0      | 0      | 0      | 0      | 0      |
| Xanthomonadaceae  | 1              | 39             | 0      | 1      | 0      | 0      | 0      | 0      | 0      | 0      | 0      | 0      | 0      | 0      | 0      | 0      | 0      | 0      | 0      | 0      |
| Xanthomonas       | 2              | 162            | 1      | 1      | 1      | 0      | 0      | 1      | 0      | 0      | 1      | 0      | 0      | 0      | 0      | 0      | 0      | 0      | 1      | 0      |
| Xenorhabdus       | 2              | 127            | 1      | 1      | 0      | 0      | 0      | 0      | 0      | 0      | 0      | 1      | 0      | 0      | 0      | 0      | 0      | 0      | 0      | 0      |
| Xylanimonas       | 2              | 66             | 0      | 1      | 0      | 0      | 0      | 1      | 0      | 0      | 0      | 0      | 0      | 0      | 0      | 0      | 0      | 0      | 1      | 0      |
| Xylella           | 2              | 52             | 0      | 1      | 0      | 0      | 0      | 0      | 0      | 0      | 0      | 0      | 0      | 0      | 0      | 0      | 0      | 0      | 0      | 0      |
| Yersinia          | 2              | 145            | 0      | 1      | 1      | 0      | 0      | 1      | 0      | 0      | 0      | 0      | 0      | 0      | 0      | 0      | 0      | 0      | 0      | 0      |
| Yokenella         | 2              | 61             | 0      | 1      | 0      | 0      | 0      | 0      | 0      | 0      | 0      | 0      | 0      | 0      | 0      | 0      | 0      | 0      | 0      | 0      |
| Zobellia          | 1              | 28             | 1      | 1      | 0      | 0      | 0      | 1      | 0      | 0      | 0      | 0      | 0      | 0      | 0      | 0      | 0      | 0      | 1      | 0      |
| Zunongwangia      | 2              | 98             | 1      | 1      | 0      | 0      | 0      | 1      | 0      | 0      | 0      | 0      | 0      | 0      | 0      | 0      | 0      | 0      | 0      | 0      |
| Zymomonas         | 2              | 67             | 0      | 1      | 0      | 0      | 0      | 0      | 0      | 0      | 0      | 0      | 0      | 0      | 0      | 0      | 0      | 0      | 0      | 0      |
| Zymophilus        | 1              | 2              | 0      | 0      | 0      | 0      | 0      | 0      | 0      | 0      | 0      | 0      | 0      | 0      | 0      | 0      | 0      | 0      | 0      | 0      |

| Genus               | Cluster Number | Protein Counts | K00448 | K00451 | K00462 | K00480 | K00481 | K00485 | K00492 | K00493 | K00531 | K00539 | K00569 | K00599 | K00622 | K00626 | K00632 | K00680 | K00757 | K00758 |
|---------------------|----------------|----------------|--------|--------|--------|--------|--------|--------|--------|--------|--------|--------|--------|--------|--------|--------|--------|--------|--------|--------|
| Acaricomes          | 1              | 2              | 0      | 0      | 0      | 0      | 0      | 0      | 0      | 0      | 0      | 0      | 0      | 0      | 0      | 0      | 0      | 0      | 0      | 0      |
| Acaryochloris       | 2              | 88             | 0      | 0      | 0      | 1      | 0      | 0      | 0      | 0      | 0      | 0      | 0      | 0      | 0      | 0      | 1      | 0      | 1      | 0      |
| Acetivibrio         | 1              | 2              | 0      | 0      | 0      | 0      | 0      | 0      | 0      | 0      | 0      | 0      | 0      | 0      | 0      | 0      | 0      | 0      | 0      | 0      |
| Acetobacter         | 2              | 85             | 0      | 0      | 0      | 0      | 0      | 0      | 0      | 0      | 0      | 0      | 1      | 0      | 0      | 0      | 0      | 0      | 0      | 0      |
| Acetobacteraceae    | 1              | 2              | 0      | 0      | 0      | 0      | 0      | 0      | 0      | 0      | 0      | 0      | 0      | 0      | 0      | 0      | 0      | 0      | 0      | 0      |
| Acetobacterium      | 1              | 8              | 0      | 0      | 0      | 0      | 0      | 0      | 0      | 0      | 1      | 0      | 0      | 0      | 0      | 0      | 0      | 0      | 0      | 0      |
| Acetohalobium       | 2              | 79             | 0      | 0      | 0      | 0      | 0      | 0      | 0      | 0      | 0      | 0      | 0      | 0      | 0      | 1      | 0      | 0      | 0      | 0      |
| Acholeplasma        | 2              | 38             | 0      | 0      | 0      | 0      | 0      | 0      | 0      | 0      | 0      | 0      | 0      | 1      | 0      | 1      | 0      | 0      | 0      | 0      |
| Achromobacter       | 2              | 192            | 0      | 1      | 1      | 1      | 0      | 0      | 1      | 0      | 0      | 0      | 1      | 0      | 0      | 1      | 1      | 0      | 0      | 1      |
| Acidaminococcus     | 1              | 65             | 0      | 0      | 0      | 0      | 0      | 0      | 0      | 0      | 0      | 0      | 0      | 0      | 0      | 1      | 0      | 0      | 1      | 0      |
| Acidianus           | 1              | 9              | 0      | 0      | 0      | 0      | 0      | 0      | 0      | 0      | 0      | 0      | 0      | 0      | 0      | 1      | 0      | 0      | 0      | 0      |
| Acidilobus          | 1              | 8              | 0      | 0      | 0      | 0      | 0      | 0      | 0      | 0      | 0      | 0      | 0      | 0      | 0      | 1      | 0      | 0      | 1      | 0      |
| Acidimicrobium      | 2              | 58             | 0      | 1      | 0      | 0      | 0      | 0      | 0      | 0      | 0      | 0      | 0      | 0      | 0      | 1      | 1      | 0      | 0      | 0      |
| Acidiphilium        | 3              | 144            | 1      | 0      | 0      | 0      | 1      | 0      | 0      | 0      | 0      | 0      | 0      | 0      | 0      | 1      | 1      | 0      | 0      | 0      |
| Acidithiobacillus   | 2              | 70             | 0      | 0      | 0      | 0      | 0      | 0      | 0      | 0      | 0      | 0      | 0      | 0      | 0      | 0      | 0      | 0      | 0      | 0      |
| Acidobacterium      | 2              | 91             | 0      | 1      | 0      | 0      | 0      | 0      | 0      | 0      | 0      | 0      | 0      | 0      | 0      | 1      | 1      | 0      | 0      | 0      |
| Acidocella          | 1              | 2              | 0      | 0      | 0      | 0      | 0      | 0      | 0      | 0      | 0      | 0      | 0      | 0      | 0      | 0      | 0      | 0      | 0      | 0      |
| Acidothermus        | 2              | 68             | 0      | 0      | 0      | 0      | 0      | 0      | 0      | 0      | 0      | 0      | 0      | 1      | 0      | 1      | 0      | 0      | 0      | 0      |
| Acidovorax          | 3              | 217            | 0      | 0      | 0      | 1      | 1      | 0      | 1      | 0      | 0      | 0      | 0      | 1      | 0      | 1      | 1      | 0      | 0      | 1      |
| Aciduliprofundum    | 1              | 11             | 0      | 0      | 0      | 0      | 0      | 0      | 0      | 0      | 0      | 0      | 0      | 0      | 0      | 1      | 0      | 0      | 1      | 1      |
| Acinetobacter       | 3              | 188            | 1      | 0      | 1      | 1      | 1      | 0      | 1      | 0      | 0      | 0      | 1      | 1      | 0      | 1      | 1      | 1      | 0      | 0      |
| Actinobacillus      | 2              | 112            | 0      | 0      | 0      | 0      | 0      | 0      | 0      | 0      | 0      | 0      | 0      | 0      | 0      | 0      | 1      | 1      | 1      | 0      |
| Actinomadura        | 1              | 1              | 0      | 0      | 0      | 0      | 0      | 0      | 0      | 0      | 0      | 0      | 0      | 0      | 0      | 0      | 0      | 0      | 0      | 0      |
| Actinoplanes        | 1              | 52             | 1      | 1      | 0      | 1      | 1      | 0      | 0      | 0      | 0      | 0      | 1      | 0      | 0      | 1      | 0      | 0      | 0      | 1      |
| Actinopolyspora     | 1              | 2              | 0      | 0      | 0      | 0      | 0      | 0      | 0      | 0      | 0      | 0      | 0      | 0      | 0      | 0      | 0      | 0      | 0      | 0      |
| Actinosynnema       | 2              | 122            | 1      | 1      | 0      | 0      | 1      | 0      | 0      | 0      | 0      | 0      | 1      | 1      | 0      | 1      | 1      | 0      | 1      | 1      |
| Advenella           | 1              | 30             | 0      | 1      | 0      | 1      | 0      | 0      | 0      | 0      | 0      | 0      | 0      | 0      | 0      | 1      | 0      | 0      | 0      | 0      |
| Aequorivita         | 1              | 12             | 0      | 1      | 0      | 0      | 0      | 0      | 0      | 0      | 0      | 0      | 0      | 0      | 0      | 1      | 0      | 0      | 1      | 0      |
| Aerococcus          | 2              | 57             | 0      | 0      | 0      | 0      | 0      | 0      | 0      | 0      | 0      | 0      | 0      | 1      | 0      | 1      | 0      | 0      | 0      | 0      |
| Aeromonas           | 2              | 127            | 0      | 1      | 0      | 0      | 0      | 0      | 0      | 0      | 0      | 0      | 1      | 0      | 0      | 1      | 1      | 1      | 1      | 1      |
| Aeropyrum           | 1              | 13             | 0      | 0      | 0      | 0      | 0      | 0      | 0      | 0      | 0      | 0      | 0      | 1      | 0      | 1      | 1      | 0      | 1      | 0      |
| Afipia              | 1              | 54             | 0      | 0      | 0      | 0      | 0      | 0      | 0      | 0      | 0      | 0      | 0      | 0      | 0      | 1      | 0      | 0      | 0      | 0      |
| Aggregatibacter     | 1              | 81             | 0      | 0      | 0      | 0      | 0      | 0      | 0      | 0      | 0      | 0      | 0      | 0      | 0      | 1      | 0      | 0      | 1      | 0      |
| Agrobacterium       | 2              | 242            | 1      | 1      | 0      | 1      | 1      | 1      | 1      | 1      | 0      | 0      | 0      | 1      | 0      | 1      | 1      | 1      | 1      | 1      |
| Ahrensia            | 1              | 2              | 0      | 0      | 0      | 0      | 0      | 0      | 0      | 0      | 0      | 0      | 0      | 0      | 0      | 0      | 0      | 0      | 0      | 0      |
| Akkermansia         | 2              | 47             | 0      | 0      | 0      | 0      | 0      | 0      | 0      | 0      | 0      | 0      | 0      | 0      | 0      | 0      | 0      | 0      | 0      | 0      |
| Albidiferax         | 3              | 144            | 0      | 0      | 0      | 1      | 1      | 0      | 0      | 0      | 0      | 0      | 0      | 0      | 0      | 1      | 1      | 1      | 0      | 1      |
| Alcaligenes         | 1              | 21             | 0      | 0      | 0      | 0      | 0      | 0      | 0      | 0      | 0      | 0      | 0      | 0      | 0      | 1      | 0      | 0      | 0      | 0      |
| Alcanivorax         | 2              | 146            | 0      | 0      | 0      | 0      | 0      | 0      | 1      | 0      | 0      | 0      | 1      | 1      | 0      | 1      | 1      | 1      | 0      | 0      |
| Alicyclophilus      | 3              | 152            | 0      | 0      | 0      | 1      | 0      | 0      | 0      | 0      | 0      | 0      | 0      | 0      | 0      | 1      | 1      | 0      | 0      | 1      |
| Alicyclobacillus    | 2              | 91             | 0      | 0      | 0      | 0      | 1      | 0      | 0      | 0      | 0      | 0      | 0      | 1      | 0      | 1      | 1      | 0      | 0      | 0      |
| Aliivibrio          | 2              | 118            | 0      | 0      | 0      | 0      | 0      | 0      | 0      | 0      | 0      | 0      | 1      | 1      | 0      | 0      | 1      | 1      | 1      | 1      |
| Alishewanella       | 1              | 1              | 0      | 0      | 0      | 0      | 0      | 0      | 0      | 0      | 0      | 0      | 0      | 0      | 0      | 0      | 0      | 0      | 0      | 0      |
| Alistipes           | 1              | 52             | 0      | 0      | 0      | 0      | 0      | 0      | 0      | 0      | 0      | 0      | 0      | 0      | 0      | 0      | 0      | 0      | 1      | 0      |
| Alkalilimnicola     | 2              | 97             | 0      | 0      | 0      | 0      | 0      | 0      | 0      | 0      | 0      | 0      | 0      | 0      | 0      | 1      | 1      | 0      | 0      | 0      |
| Alkaliphilus        | 2              | 62             | 0      | 0      | 0      | 0      | 0      | 0      | 0      | 0      | 0      | 0      | 0      | 1      | 0      | 1      | 0      | 0      | 1      | 0      |
| Allochromatium      | 2              | 84             | 0      | 0      | 0      | 0      | 0      | 0      | 0      | 0      | 0      | 0      | 1      | 0      | 0      | 1      | 0      | 0      | 0      | 0      |
| Alphaproteobacteria | 1              | 3              | 0      | 0      | 0      | 0      | 0      | 0      | 0      | 0      | 0      | 0      | 0      | 0      | 0      | 0      | 0      | 0      | 0      | 1      |
| Alteromonadales     | 1              | 12             | 0      | 0      | 0      | 0      | 0      | 0      | 0      | 0      | 0      | 0      | 0      | 0      | 0      | 0      | 1      | 0      | 0      | 0      |
| Alteromonas         | 1              | 37             | 0      | 1      | 0      | 0      | 0      | 0      | 0      | 0      | 0      | 0      | 1      | 0      | 0      | 1      | 1      | 0      | 0      | 0      |
| Aminobacter         | 1              | 4              | 0      | 0      | 0      | 0      | 0      | 0      | 0      | 0      | 0      | 0      | 0      | 0      | 0      | 0      | 0      | 0      | 0      | 0      |
| Aminobacterium      | 2              | 59             | 0      | 0      | 0      | 0      | 0      | 0      | 0      | 0      | 0      | 0      | 0      | 1      | 0      | 1      | 0      | 0      | 0      | 0      |

| Genus            | Cluster Number | Protein Counts | K00448 | K00451 | K00462 | K00480 | K00481 | K00485 | K00492 | K00493 | K00531 | K00539 | K00569 | K00599 | K00622 | K00626 | K00632 | K00680 | K00757 | K00758 |
|------------------|----------------|----------------|--------|--------|--------|--------|--------|--------|--------|--------|--------|--------|--------|--------|--------|--------|--------|--------|--------|--------|
| Ammonifex        | 2              | 50             | 0      | 0      | 0      | 0      | 0      | 0      | 0      | 0      | 0      | 0      | 0      | 0      | 0      | 0      | 0      | 0      | 0      | 0      |
| Amphibacillus    | 1              | 13             | 0      | 0      | 0      | 0      | 0      | 0      | 0      | 0      | 0      | 0      | 0      | 0      | 0      | 1      | 0      | 0      | 0      | 0      |
| Amphritea        | 1              | 2              | 0      | 0      | 0      | 0      | 0      | 0      | 0      | 0      | 0      | 0      | 0      | 0      | 0      | 0      | 0      | 0      | 0      | 0      |
| Amycolatopsis    | 2              | 201            | 1      | 1      | 0      | 1      | 1      | 0      | 0      | 0      | 0      | 0      | 0      | 1      | 0      | 1      | 1      | 0      | 1      | 1      |
| Amycolicoccus    | 1              | 43             | 0      | 1      | 0      | 0      | 0      | 0      | 0      | 0      | 0      | 0      | 0      | 1      | 0      | 1      | 0      | 0      | 0      | 1      |
| Anabaena         | 2              | 92             | 0      | 0      | 0      | 0      | 0      | 0      | 0      | 1      | 0      | 0      | 0      | 1      | 0      | 0      | 0      | 0      | 0      | 0      |
| Anaerobaculum    | 1              | 11             | 0      | 0      | 0      | 0      | 0      | 0      | 0      | 0      | 0      | 0      | 0      | 0      | 0      | 0      | 0      | 0      | 0      | 0      |
| Anaerococcus     | 2              | 46             | 0      | 0      | 0      | 0      | 0      | 0      | 0      | 0      | 0      | 0      | 0      | 0      | 0      | 1      | 0      | 0      | 0      | 0      |
| Anaerolinea      | 2              | 66             | 0      | 0      | 0      | 0      | 0      | 0      | 0      | 0      | 0      | 0      | 0      | 0      | 0      | 1      | 0      | 0      | 0      | 0      |
| Anaeromyxobacter | 3              | 117            | 0      | 1      | 0      | 0      | 0      | 0      | 0      | 0      | 0      | 0      | 0      | 1      | 0      | 1      | 1      | 0      | 0      | 1      |
| Anaerostipes     | 1              | 44             | 0      | 0      | 0      | 0      | 0      | 0      | 0      | 0      | 0      | 0      | 0      | 0      | 0      | 1      | 0      | 0      | 0      | 0      |
| Anaerotruncus    | 1              | 2              | 0      | 0      | 0      | 0      | 0      | 0      | 0      | 0      | 0      | 0      | 0      | 0      | 0      | 0      | 0      | 0      | 0      | 0      |
| Anaplasma        | 1              | 35             | 0      | 0      | 0      | 0      | 0      | 0      | 0      | 0      | 0      | 0      | 0      | 1      | 0      | 0      | 0      | 0      | 0      | 0      |
| Ancylobacter     | 1              | 3              | 0      | 0      | 0      | 0      | 0      | 0      | 0      | 0      | 0      | 0      | 0      | 0      | 0      | 0      | 0      | 0      | 0      | 0      |
| Aneurinibacillus | 1              | 1              | 0      | 0      | 0      | 0      | 0      | 0      | 0      | 0      | 0      | 0      | 0      | 0      | 0      | 0      | 0      | 0      | 0      | 0      |
| Angomonas        | 1              | 1              | 0      | 0      | 0      | 0      | 0      | 0      | 0      | 0      | 0      | 0      | 0      | 0      | 0      | 0      | 0      | 0      | 0      | 0      |
| Anoxybacillus    | 2              | 72             | 0      | 0      | 0      | 0      | 0      | 0      | 0      | 0      | 0      | 0      | 0      | 0      | 0      | 1      | 1      | 0      | 0      | 0      |
| Aquifex          | 2              | 45             | 0      | 0      | 0      | 0      | 0      | 0      | 0      | 0      | 0      | 0      | 0      | 1      | 0      | 0      | 0      | 0      | 0      | 0      |
| Aquimarina       | 1              | 2              | 0      | 0      | 0      | 0      | 0      | 0      | 0      | 0      | 0      | 0      | 0      | 0      | 0      | 0      | 1      | 0      | 0      | 0      |
| Arcanobacterium  | 2              | 45             | 0      | 0      | 0      | 0      | 0      | 0      | 0      | 0      | 0      | 0      | 0      | 1      | 0      | 0      | 0      | 0      | 0      | 1      |
| Archaeoglobus    | 1              | 14             | 0      | 0      | 0      | 0      | 0      | 0      | 0      | 0      | 0      | 0      | 0      | 1      | 0      | 1      | 1      | 0      | 0      | 1      |
| Arcobacter       | 2              | 101            | 0      | 0      | 0      | 0      | 0      | 0      | 0      | 0      | 0      | 0      | 1      | 0      | 0      | 1      | 0      | 1      | 0      | 0      |
| Aromatoleum      | 3              | 133            | 0      | 0      | 0      | 1      | 0      | 0      | 0      | 0      | 0      | 0      | 0      | 1      | 0      | 1      | 1      | 1      | 0      | 0      |
| Arsenophonus     | 1              | 4              | 0      | 0      | 0      | 0      | 0      | 0      | 0      | 0      | 0      | 0      | 0      | 0      | 0      | 0      | 0      | 0      | 0      | 0      |
| Arthrobacter     | 2              | 206            | 1      | 0      | 0      | 1      | 1      | 0      | 1      | 0      | 0      | 0      | 0      | 1      | 0      | 1      | 1      | 1      | 0      | 1      |
| Arthrospira      | 2              | 67             | 0      | 0      | 0      | 0      | 0      | 0      | 0      | 0      | 0      | 0      | 0      | 0      | 0      | 1      | 0      | 0      | 0      | 0      |
| Aster            | 1              | 10             | 0      | 0      | 0      | 0      | 0      | 0      | 0      | 0      | 0      | 0      | 0      | 0      | 0      | 0      | 0      | 0      | 0      | 0      |
| Asticcacaulis    | 2              | 103            | 0      | 1      | 0      | 0      | 0      | 0      | 0      | 0      | 0      | 0      | 0      | 1      | 0      | 1      | 0      | 0      | 0      | 0      |
| Atopobium        | 1              | 28             | 0      | 0      | 0      | 0      | 0      | 0      | 0      | 0      | 0      | 0      | 0      | 1      | 0      | 0      | 0      | 0      | 0      | 0      |
| Aurantimonas     | 1              | 2              | 0      | 0      | 0      | 0      | 0      | 0      | 0      | 0      | 0      | 0      | 0      | 0      | 0      | 0      | 0      | 0      | 0      | 0      |
| Avibacterium     | 1              | 17             | 0      | 0      | 0      | 0      | 0      | 0      | 0      | 0      | 0      | 0      | 0      | 0      | 0      | 0      | 0      | 0      | 0      | 0      |
| Azoarcus         | 3              | 172            | 0      | 0      | 1      | 1      | 1      | 0      | 1      | 0      | 0      | 0      | 1      | 1      | 0      | 1      | 1      | 1      | 0      | 0      |
| Azorhizobium     | 3              | 149            | 1      | 0      | 1      | 1      | 1      | 1      | 0      | 0      | 0      | 0      | 0      | 1      | 0      | 1      | 1      | 1      | 0      | 1      |
| Azorhizophilus   | 1              | 4              | 0      | 0      | 0      | 0      | 0      | 0      | 0      | 0      | 1      | 0      | 0      | 0      | 0      | 0      | 0      | 0      | 0      | 0      |
| Azospira         | 1              | 19             | 0      | 0      | 0      | 0      | 0      | 0      | 0      | 0      | 0      | 0      | 0      | 0      | 0      | 1      | 1      | 0      | 0      | 0      |
| Azospirillum     | 2              | 198            | 1      | 1      | 0      | 1      | 1      | 0      | 0      | 0      | 1      | 0      | 0      | 0      | 0      | 1      | 1      | 0      | 0      | 1      |
| Azotobacter      | 3              | 183            | 1      | 1      | 0      | 0      | 1      | 0      | 0      | 0      | 1      | 0      | 1      | 0      | 0      | 1      | 1      | 0      | 0      | 0      |
| Bacillales       | 1              | 9              | 0      | 0      | 0      | 0      | 0      | 0      | 0      | 0      | 0      | 0      | 0      | 0      | 0      | 0      | 0      | 0      | 0      | 0      |
| Bacilli          | 1              | 3              | 0      | 0      | 0      | 0      | 0      | 0      | 0      | 0      | 0      | 0      | 0      | 0      | 0      | 0      | 0      | 0      | 0      | 0      |
| Bacillus         | 2              | 237            | 0      | 1      | 0      | 0      | 1      | 0      | 1      | 0      | 0      | 0      | 0      | 1      | 0      | 1      | 1      | 1      | 0      | 0      |
| Bacteria         | 2              | 86             | 0      | 0      | 0      | 0      | 0      | 0      | 0      | 0      | 0      | 0      | 0      | 0      | 0      | 1      | 0      | 0      | 0      | 0      |
| Bacteriovorax    | 2              | 98             | 0      | 1      | 0      | 0      | 0      | 0      | 0      | 0      | 0      | 0      | 1      | 0      | 0      | 1      | 0      | 0      | 0      | 0      |
| Bacteroidales    | 2              | 59             | 0      | 0      | 0      | 0      | 0      | 0      | 0      | 0      | 0      | 0      | 0      | 0      | 0      | 0      | 0      | 0      | 1      | 0      |
| Bacteroides      | 2              | 96             | 0      | 0      | 0      | 0      | 0      | 0      | 0      | 0      | 0      | 0      | 0      | 1      | 0      | 0      | 0      | 1      | 1      | 0      |
| Bacteroidetes    | 1              | 2              | 0      | 0      | 0      | 0      | 0      | 0      | 0      | 0      | 0      | 0      | 0      | 0      | 0      | 0      | 0      | 0      | 0      | 0      |
| Bartonella       | 2              | 50             | 0      | 0      | 0      | 1      | 0      | 0      | 0      | 0      | 0      | 0      | 0      | 1      | 0      | 0      | 0      | 1      | 0      | 0      |
| Baumannia        | 2              | 24             | 0      | 0      | 0      | 0      | 0      | 0      | 0      | 0      | 0      | 0      | 0      | 0      | 0      | 0      | 0      | 0      | 0      | 0      |
| Bdellovibrio     | 2              | 87             | 0      | 1      | 0      | 0      | 0      | 0      | 0      | 0      | 0      | 0      | 0      | 1      | 0      | 1      | 1      | 1      | 0      | 0      |
| Beijerinckia     | 3              | 123            | 0      | 0      | 0      | 1      | 0      | 0      | 0      | 0      | 0      | 0      | 0      | 0      | 0      | 1      | 1      | 0      | 0      | 0      |
| Belliella        | 1              | 14             | 0      | 1      | 0      | 0      | 0      | 0      | 0      | 0      | 0      | 0      | 0      | 0      | 0      | 1      | 0      | 0      | 1      | 0      |
| Beutenbergia     | 2              | 82             | 0      | 0      | 0      | 0      | 0      | 0      | 0      | 0      | 0      | 0      | 0      | 1      | 0      | 1      | 1      | 0      | 0      | 1      |
| Bifidobacterium  | 2              | 61             | 0      | 0      | 0      | 0      | 0      | 0      | 0      | 0      | 0      | 0      | 0      | 1      | 0      | 0      | 0      | 0      | 0      | 0      |

| Genus                | Cluster Number | Protein Counts | K00448 | K00451 | K00462 | K00480 | K00481 | K00485 | K00492 | K00493 | K00531 | K00539 | K00569 | K00599 | K00622 | K00626 | K00632 | K00680 | K00757 | K00758 |
|----------------------|----------------|----------------|--------|--------|--------|--------|--------|--------|--------|--------|--------|--------|--------|--------|--------|--------|--------|--------|--------|--------|
| Bizionia             | 1              | 1              | 0      | 0      | 0      | 0      | 0      | 0      | 0      | 0      | 0      | 0      | 0      | 0      | 0      | 0      | 0      | 0      | 0      | 0      |
| Blastococcus         | 1              | 39             | 1      | 1      | 0      | 1      | 1      | 0      | 0      | 0      | 0      | 0      | 0      | 0      | 0      | 1      | 0      | 0      | 0      | 1      |
| Blattabacterium      | 1              | 23             | 0      | 0      | 0      | 0      | 0      | 0      | 0      | 0      | 0      | 0      | 0      | 0      | 0      | 0      | 0      | 0      | 0      | 0      |
| Blautia              | 1              | 22             | 0      | 0      | 0      | 0      | 0      | 0      | 0      | 0      | 0      | 0      | 0      | 0      | 0      | 0      | 0      | 0      | 0      | 0      |
| Bordetella           | 3              | 227            | 1      | 1      | 0      | 1      | 0      | 1      | 0      | 0      | 0      | 0      | 1      | 0      | 0      | 1      | 1      | 0      | 0      | 0      |
| Borrelia             | 1              | 32             | 0      | 0      | 0      | 0      | 0      | 0      | 0      | 0      | 0      | 0      | 0      | 1      | 0      | 1      | 0      | 0      | 0      | 0      |
| Brachybacterium      | 1              | 18             | 0      | 0      | 0      | 0      | 0      | 0      | 1      | 0      | 0      | 0      | 0      | 1      | 0      | 1      | 0      | 0      | 0      | 1      |
| Brachymonas          | 1              | 4              | 0      | 0      | 0      | 0      | 0      | 0      | 0      | 0      | 0      | 0      | 0      | 0      | 0      | 0      | 0      | 0      | 0      | 1      |
| Brachyspira          | 2              | 79             | 0      | 0      | 0      | 0      | 0      | 0      | 0      | 0      | 0      | 0      | 0      | 0      | 0      | 1      | 0      | 0      | 1      | 0      |
| Bradyrhizobiaceae    | 1              | 20             | 0      | 0      | 0      | 0      | 0      | 0      | 0      | 0      | 0      | 0      | 0      | 0      | 0      | 0      | 0      | 0      | 0      | 0      |
| Bradyrhizobium       | 3              | 254            | 1      | 1      | 1      | 1      | 1      | 1      | 1      | 1      | 0      | 0      | 0      | 1      | 0      | 1      | 0      | 1      | 0      | 1      |
| Brenneria            | 1              | 20             | 0      | 0      | 0      | 0      | 0      | 0      | 0      | 0      | 0      | 0      | 0      | 0      | 0      | 0      | 0      | 0      | 0      | 0      |
| Brevibacillus        | 2              | 122            | 0      | 1      | 0      | 0      | 0      | 0      | 0      | 0      | 0      | 0      | 0      | 0      | 0      | 1      | 1      | 0      | 1      | 0      |
| Brevibacterium       | 1              | 4              | 0      | 0      | 0      | 0      | 0      | 0      | 0      | 0      | 0      | 0      | 0      | 0      | 0      | 0      | 0      | 0      | 0      | 0      |
| Brevundimonas        | 2              | 105            | 0      | 1      | 0      | 0      | 1      | 0      | 0      | 0      | 0      | 0      | 0      | 1      | 0      | 1      | 0      | 0      | 0      | 0      |
| Brucella             | 3              | 138            | 1      | 0      | 1      | 1      | 1      | 0      | 1      | 0      | 0      | 0      | 0      | 1      | 0      | 1      | 1      | 1      | 0      | 0      |
| Buchnera             | 1              | 26             | 0      | 0      | 0      | 0      | 0      | 0      | 0      | 0      | 0      | 0      | 0      | 0      | 0      | 0      | 0      | 0      | 0      | 0      |
| Burkholderia         | 3              | 424            | 1      | 1      | 1      | 1      | 1      | 1      | 1      | 1      | 0      | 0      | 0      | 1      | 0      | 1      | 1      | 1      | 0      | 1      |
| Burkholderiaceae     | 3              | 143            | 0      | 0      | 0      | 0      | 0      | 0      | 1      | 0      | 0      | 0      | 1      | 0      | 0      | 1      | 1      | 1      | 0      | 0      |
| Burkholderiales      | 1              | 24             | 0      | 0      | 0      | 1      | 0      | 0      | 0      | 0      | 0      | 0      | 0      | 0      | 0      | 0      | 0      | 0      | 0      | 0      |
| Buttiauxella         | 1              | 2              | 0      | 0      | 0      | 0      | 0      | 0      | 0      | 0      | 0      | 0      | 0      | 0      | 0      | 0      | 0      | 0      | 0      | 0      |
| Butyrivibrio         | 2              | 67             | 0      | 0      | 0      | 0      | 0      | 0      | 0      | 0      | 0      | 0      | 0      | 1      | 0      | 1      | 0      | 0      | 1      | 0      |
| Caldanaerobacter     | 2              | 63             | 0      | 0      | 0      | 0      | 0      | 0      | 0      | 0      | 0      | 0      | 0      | 1      | 0      | 1      | 0      | 1      | 0      | 0      |
| Caldicellulosiruptor | 2              | 75             | 0      | 0      | 0      | 0      | 0      | 0      | 0      | 0      | 0      | 0      | 0      | 0      | 0      | 0      | 0      | 0      | 0      | 0      |
| Caldilinea           | 1              | 23             | 0      | 0      | 0      | 0      | 0      | 0      | 0      | 0      | 0      | 0      | 0      | 0      | 0      | 1      | 0      | 0      | 0      | 0      |
| Caldimonas           | 1              | 6              | 0      | 0      | 0      | 0      | 0      | 0      | 0      | 0      | 0      | 0      | 0      | 0      | 0      | 0      | 0      | 0      | 0      | 0      |
| Caldisericum         | 1              | 10             | 0      | 0      | 0      | 0      | 0      | 0      | 0      | 0      | 0      | 0      | 0      | 0      | 0      | 0      | 0      | 0      | 1      | 0      |
| Caldisphaera         | 1              | 7              | 0      | 0      | 0      | 0      | 0      | 0      | 0      | 0      | 0      | 0      | 0      | 0      | 0      | 1      | 0      | 0      | 1      | 0      |
| Calditerrivibrio     | 2              | 74             | 0      | 0      | 0      | 0      | 0      | 0      | 0      | 0      | 0      | 0      | 0      | 0      | 0      | 1      | 1      | 0      | 0      | 0      |
| Caldivirga           | 1              | 13             | 0      | 0      | 0      | 0      | 0      | 0      | 0      | 0      | 0      | 0      | 0      | 0      | 0      | 1      | 0      | 0      | 1      | 0      |
| Calothrix            | 1              | 43             | 0      | 0      | 0      | 1      | 0      | 0      | 0      | 0      | 0      | 0      | 0      | 0      | 0      | 0      | 0      | 0      | 1      | 0      |
| Calyptogena          | 2              | 34             | 0      | 0      | 0      | 0      | 0      | 0      | 0      | 0      | 0      | 0      | 0      | 0      | 0      | 0      | 0      | 0      | 0      | 0      |
| Campylobacter        | 2              | 80             | 0      | 0      | 0      | 0      | 0      | 0      | 0      | 0      | 0      | 0      | 0      | 1      | 0      | 0      | 0      | 1      | 0      | 0      |
| Candidatus           | 2              | 290            | 1      | 1      | 1      | 1      | 1      | 0      | 0      | 0      | 0      | 0      | 1      | 1      | 0      | 1      | 1      | 0      | 1      | 1      |
| Capnocytophaga       | 1              | 50             | 0      | 0      | 0      | 0      | 0      | 0      | 0      | 0      | 0      | 0      | 0      | 0      | 0      | 0      | 0      | 1      | 1      | 0      |
| Carbophilus          | 1              | 2              | 0      | 0      | 0      | 0      | 0      | 0      | 0      | 0      | 0      | 0      | 0      | 0      | 0      | 0      | 0      | 0      | 0      | 0      |
| Carboxydibrachium    | 1              | 14             | 0      | 0      | 0      | 0      | 0      | 0      | 0      | 0      | 0      | 0      | 0      | 1      | 0      | 0      | 0      | 0      | 0      | 0      |
| Carboxydotherrmus    | 2              | 68             | 0      | 0      | 0      | 0      | 0      | 0      | 0      | 0      | 0      | 0      | 0      | 0      | 0      | 1      | 1      | 0      | 0      | 0      |
| Carica               | 1              | 2              | 0      | 0      | 0      | 0      | 0      | 0      | 0      | 0      | 0      | 0      | 0      | 0      | 0      | 0      | 0      | 0      | 0      | 0      |
| Carnobacterium       | 2              | 71             | 0      | 0      | 0      | 0      | 0      | 0      | 0      | 0      | 0      | 0      | 0      | 0      | 0      | 1      | 1      | 1      | 0      | 0      |
| Catenibacterium      | 1              | 2              | 0      | 0      | 0      | 0      | 0      | 0      | 0      | 0      | 0      | 0      | 0      | 0      | 0      | 0      | 0      | 0      | 0      | 0      |
| Catenovulum          | 1              | 2              | 0      | 0      | 0      | 0      | 0      | 0      | 0      | 0      | 0      | 0      | 0      | 0      | 0      | 0      | 0      | 0      | 0      | 0      |
| Catenulispora        | 3              | 159            | 1      | 1      | 0      | 0      | 1      | 0      | 0      | 0      | 0      | 0      | 0      | 1      | 0      | 1      | 1      | 0      | 0      | 1      |
| Caulobacter          | 3              | 168            | 1      | 1      | 0      | 0      | 1      | 0      | 0      | 0      | 0      | 0      | 0      | 1      | 0      | 1      | 1      | 0      | 0      | 1      |
| Cedecea              | 1              | 45             | 0      | 0      | 0      | 0      | 0      | 0      | 0      | 0      | 0      | 0      | 0      | 0      | 0      | 0      | 1      | 0      | 1      | 1      |
| Cellulomonas         | 2              | 96             | 0      | 0      | 0      | 1      | 0      | 0      | 0      | 0      | 0      | 0      | 0      | 1      | 0      | 1      | 1      | 0      | 0      | 1      |
| Cellulophaga         | 2              | 105            | 0      | 1      | 0      | 0      | 0      | 0      | 0      | 0      | 0      | 0      | 0      | 0      | 0      | 1      | 1      | 0      | 1      | 0      |
| Cellulosilyticum     | 1              | 14             | 0      | 0      | 0      | 0      | 0      | 0      | 0      | 0      | 0      | 0      | 0      | 1      | 0      | 0      | 0      | 0      | 0      | 0      |
| Cellvibrio           | 2              | 85             | 0      | 0      | 0      | 0      | 0      | 0      | 0      | 0      | 0      | 0      | 0      | 0      | 0      | 0      | 1      | 0      | 0      | 0      |
| Cenarchaeum          | 1              | 7              | 0      | 0      | 0      | 0      | 0      | 0      | 0      | 0      | 0      | 0      | 0      | 0      | 0      | 1      | 0      | 0      | 0      | 0      |
| Chamaesiphon         | 1              | 13             | 0      | 0      | 0      | 0      | 0      | 0      | 0      | 0      | 0      | 0      | 0      | 0      | 0      | 0      | 0      | 0      | 0      | 0      |
| Chelativorans        | 3              | 136            | 1      | 1      | 0      | 1      | 1      | 0      | 0      | 0      | 0      | 0      | 0      | 1      | 0      | 1      | 1      | 0      | 0      | 1      |

| Genus                  | Cluster Number | Protein Counts | K00448 | K00451 | K00462 | K00480 | K00481 | K00485 | K00492 | K00493 | K00531 | K00539 | K00569 | K00599 | K00622 | K00626 | K00632 | K00680 | K00757 | K00758 |
|------------------------|----------------|----------------|--------|--------|--------|--------|--------|--------|--------|--------|--------|--------|--------|--------|--------|--------|--------|--------|--------|--------|
| Chelatococcus          | 1              | 2              | 0      | 1      | 0      | 0      | 0      | 0      | 0      | 0      | 0      | 0      | 0      | 0      | 0      | 0      | 0      | 0      | 0      | 0      |
| Chitinophaga           | 2              | 98             | 0      | 1      | 0      | 0      | 1      | 0      | 0      | 0      | 0      | 0      | 0      | 0      | 0      | 1      | 1      | 0      | 1      | 0      |
| Chlamydia              | 1              | 36             | 0      | 0      | 0      | 0      | 0      | 0      | 0      | 0      | 0      | 0      | 0      | 1      | 0      | 0      | 0      | 0      | 0      | 0      |
| Chlamydomonas          | 1              | 3              | 0      | 0      | 0      | 0      | 0      | 0      | 0      | 0      | 0      | 0      | 0      | 0      | 0      | 0      | 0      | 0      | 0      | 0      |
| Chlamydomphila         | 1              | 31             | 0      | 0      | 0      | 0      | 0      | 0      | 0      | 0      | 0      | 0      | 0      | 1      | 0      | 0      | 0      | 0      | 0      | 0      |
| Chlorobaculum          | 2              | 61             | 0      | 0      | 0      | 0      | 0      | 0      | 0      | 0      | 0      | 0      | 0      | 0      | 0      | 0      | 0      | 0      | 0      | 0      |
| Chlorobium             | 2              | 89             | 0      | 0      | 0      | 0      | 0      | 0      | 0      | 0      | 0      | 0      | 0      | 0      | 0      | 0      | 0      | 0      | 0      | 0      |
| Chlorobium/Pelodictyon | 1              | 2              | 0      | 0      | 0      | 0      | 0      | 0      | 0      | 0      | 0      | 0      | 0      | 0      | 0      | 0      | 0      | 0      | 0      | 0      |
| Chloroflexus           | 2              | 105            | 0      | 1      | 0      | 0      | 0      | 0      | 0      | 0      | 0      | 0      | 0      | 1      | 0      | 1      | 1      | 0      | 0      | 0      |
| Chlorogloeopsis        | 1              | 9              | 0      | 0      | 0      | 0      | 0      | 0      | 0      | 0      | 0      | 0      | 0      | 0      | 0      | 0      | 0      | 0      | 0      | 0      |
| Chloroherpeton         | 2              | 59             | 0      | 0      | 0      | 0      | 0      | 0      | 0      | 0      | 1      | 0      | 0      | 0      | 0      | 0      | 0      | 0      | 0      | 0      |
| Chromobacterium        | 2              | 117            | 0      | 1      | 0      | 0      | 0      | 0      | 0      | 0      | 0      | 0      | 0      | 1      | 0      | 1      | 1      | 1      | 0      | 1      |
| Chromohalobacter       | 2              | 145            | 1      | 0      | 0      | 0      | 1      | 1      | 0      | 0      | 0      | 0      | 1      | 0      | 0      | 1      | 1      | 0      | 0      | 1      |
| Chroococciopsis        | 1              | 24             | 0      | 1      | 0      | 0      | 0      | 0      | 0      | 0      | 0      | 0      | 0      | 0      | 0      | 0      | 0      | 0      | 1      | 0      |
| Chryseobacterium       | 2              | 104            | 0      | 0      | 0      | 1      | 1      | 0      | 0      | 0      | 0      | 0      | 0      | 0      | 0      | 1      | 1      | 0      | 0      | 0      |
| Citricella             | 1              | 13             | 0      | 0      | 0      | 0      | 0      | 0      | 0      | 0      | 0      | 0      | 0      | 0      | 0      | 1      | 0      | 0      | 0      | 0      |
| Citrobacter            | 2              | 190            | 1      | 0      | 0      | 1      | 1      | 0      | 0      | 0      | 0      | 0      | 0      | 0      | 0      | 1      | 1      | 1      | 1      | 1      |
| Clavibacter            | 2              | 83             | 0      | 0      | 0      | 0      | 0      | 0      | 0      | 0      | 0      | 0      | 0      | 1      | 0      | 0      | 1      | 1      | 0      | 1      |
| Clonorchis             | 1              | 1              | 0      | 0      | 0      | 0      | 0      | 0      | 0      | 0      | 0      | 0      | 0      | 0      | 0      | 0      | 0      | 0      | 0      | 0      |
| Clostridiales          | 2              | 77             | 0      | 0      | 0      | 0      | 0      | 0      | 0      | 0      | 0      | 0      | 0      | 0      | 0      | 1      | 0      | 0      | 1      | 0      |
| Clostridium            | 2              | 191            | 0      | 0      | 0      | 0      | 0      | 0      | 0      | 0      | 1      | 0      | 0      | 1      | 0      | 1      | 0      | 1      | 1      | 1      |
| Cohnella               | 1              | 2              | 0      | 0      | 0      | 0      | 0      | 0      | 0      | 0      | 0      | 0      | 0      | 0      | 0      | 0      | 0      | 0      | 0      | 0      |
| Coleofasciculus        | 1              | 4              | 0      | 0      | 0      | 0      | 0      | 0      | 0      | 0      | 0      | 0      | 0      | 0      | 0      | 0      | 0      | 0      | 0      | 0      |
| Collimonas             | 1              | 35             | 1      | 1      | 0      | 0      | 1      | 0      | 0      | 0      | 0      | 0      | 1      | 0      | 0      | 1      | 1      | 0      | 0      | 0      |
| Colwellia              | 2              | 130            | 0      | 0      | 0      | 0      | 0      | 0      | 0      | 0      | 0      | 0      | 1      | 0      | 0      | 1      | 1      | 1      | 0      | 1      |
| Comamonas              | 2              | 196            | 0      | 0      | 0      | 1      | 1      | 0      | 0      | 0      | 0      | 0      | 0      | 0      | 0      | 1      | 1      | 0      | 0      | 1      |
| Conexibacter           | 3              | 117            | 0      | 1      | 0      | 1      | 0      | 0      | 0      | 0      | 0      | 0      | 0      | 0      | 0      | 1      | 1      | 0      | 0      | 0      |
| Coprobacillus          | 1              | 2              | 0      | 0      | 0      | 0      | 0      | 0      | 0      | 0      | 0      | 0      | 0      | 0      | 0      | 0      | 0      | 0      | 0      | 0      |
| Coprococcus            | 2              | 76             | 0      | 0      | 0      | 0      | 0      | 0      | 0      | 0      | 0      | 0      | 0      | 0      | 0      | 1      | 0      | 0      | 1      | 0      |
| Coprothermobacter      | 2              | 45             | 0      | 0      | 0      | 0      | 0      | 0      | 0      | 0      | 0      | 0      | 0      | 0      | 0      | 1      | 0      | 0      | 1      | 0      |
| Coralimargarita        | 2              | 68             | 0      | 0      | 0      | 0      | 0      | 0      | 0      | 0      | 0      | 0      | 0      | 0      | 0      | 0      | 0      | 0      | 0      | 0      |
| Corallococcus          | 1              | 29             | 0      | 1      | 0      | 0      | 0      | 0      | 0      | 0      | 0      | 0      | 0      | 0      | 0      | 1      | 0      | 0      | 0      | 0      |
| Coriobacterium         | 2              | 36             | 0      | 0      | 0      | 0      | 0      | 0      | 0      | 0      | 0      | 0      | 0      | 1      | 0      | 0      | 0      | 0      | 1      | 0      |
| Corynebacterineae      | 1              | 5              | 0      | 0      | 0      | 0      | 0      | 0      | 0      | 0      | 0      | 0      | 0      | 0      | 0      | 1      | 0      | 0      | 0      | 0      |
| Corynebacterium        | 2              | 175            | 1      | 0      | 0      | 1      | 1      | 1      | 1      | 0      | 0      | 0      | 0      | 1      | 0      | 1      | 1      | 1      | 0      | 1      |
| Coxiella               | 2              | 54             | 0      | 0      | 0      | 0      | 0      | 0      | 0      | 0      | 0      | 0      | 0      | 1      | 0      | 1      | 0      | 0      | 1      | 0      |
| Crinalium              | 1              | 21             | 0      | 1      | 0      | 1      | 0      | 0      | 0      | 0      | 0      | 0      | 1      | 0      | 0      | 1      | 0      | 0      | 0      | 0      |
| Croceibacter           | 2              | 80             | 0      | 1      | 0      | 0      | 0      | 0      | 0      | 0      | 0      | 0      | 0      | 0      | 0      | 1      | 1      | 0      | 1      | 0      |
| Crocospaera            | 1              | 6              | 0      | 0      | 0      | 0      | 0      | 0      | 0      | 0      | 0      | 0      | 0      | 0      | 0      | 0      | 0      | 0      | 0      | 0      |
| Cronobacter            | 2              | 120            | 0      | 0      | 0      | 0      | 0      | 0      | 0      | 0      | 0      | 0      | 0      | 0      | 0      | 1      | 1      | 0      | 1      | 1      |
| Cryptobacterium        | 2              | 39             | 0      | 0      | 0      | 0      | 0      | 0      | 0      | 0      | 0      | 0      | 0      | 1      | 0      | 0      | 0      | 0      | 0      | 0      |
| Cucumis                | 1              | 9              | 0      | 0      | 0      | 0      | 0      | 0      | 0      | 0      | 0      | 0      | 0      | 0      | 0      | 0      | 0      | 0      | 0      | 0      |
| Cupriavidus            | 3              | 317            | 1      | 1      | 1      | 1      | 1      | 0      | 1      | 1      | 0      | 0      | 1      | 1      | 0      | 1      | 1      | 1      | 0      | 1      |
| Curtobacterium         | 1              | 5              | 0      | 0      | 0      | 0      | 0      | 0      | 0      | 0      | 0      | 0      | 0      | 0      | 0      | 0      | 0      | 0      | 0      | 0      |
| Curvibacter            | 1              | 27             | 0      | 0      | 0      | 0      | 0      | 0      | 0      | 0      | 0      | 0      | 0      | 0      | 0      | 0      | 1      | 0      | 0      | 0      |
| Cyanobacterium         | 1              | 9              | 0      | 0      | 0      | 1      | 0      | 0      | 0      | 0      | 0      | 0      | 0      | 0      | 0      | 0      | 0      | 0      | 0      | 0      |
| Cyanobium              | 1              | 10             | 0      | 0      | 0      | 0      | 0      | 0      | 0      | 0      | 0      | 0      | 0      | 0      | 0      | 0      | 0      | 0      | 0      | 0      |
| Cyanothece             | 1              | 34             | 0      | 1      | 0      | 1      | 0      | 0      | 0      | 0      | 0      | 0      | 0      | 0      | 0      | 1      | 1      | 0      | 1      | 0      |
| Cyclobacterium         | 1              | 19             | 0      | 0      | 0      | 0      | 0      | 0      | 0      | 0      | 0      | 0      | 0      | 0      | 0      | 1      | 1      | 0      | 1      | 1      |
| Cycloclasticus         | 1              | 21             | 0      | 0      | 0      | 0      | 0      | 0      | 0      | 0      | 0      | 0      | 1      | 0      | 0      | 1      | 0      | 0      | 0      | 0      |
| Cylindrospermopsis     | 1              | 4              | 0      | 0      | 0      | 0      | 0      | 0      | 0      | 0      | 0      | 0      | 0      | 0      | 0      | 0      | 0      | 0      | 0      | 0      |
| Cylindrospermum        | 1              | 30             | 0      | 0      | 0      | 0      | 0      | 0      | 0      | 0      | 0      | 0      | 0      | 0      | 0      | 0      | 0      | 0      | 0      | 0      |

| Genus              | Cluster Number | Protein Counts | K00448 | K00451 | K00462 | K00480 | K00481 | K00485 | K00492 | K00493 | K00531 | K00539 | K00569 | K00599 | K00622 | K00626 | K00632 | K00680 | K00757 | K00758 |
|--------------------|----------------|----------------|--------|--------|--------|--------|--------|--------|--------|--------|--------|--------|--------|--------|--------|--------|--------|--------|--------|--------|
| Cytophaga          | 2              | 69             | 0      | 0      | 0      | 0      | 0      | 0      | 0      | 0      | 0      | 0      | 0      | 1      | 0      | 1      | 1      | 1      | 0      | 0      |
| Dactylococcopsis   | 1              | 8              | 0      | 0      | 0      | 0      | 0      | 0      | 0      | 0      | 0      | 0      | 0      | 0      | 0      | 0      | 0      | 0      | 0      | 0      |
| Dechloromonas      | 1              | 40             | 0      | 0      | 1      | 0      | 0      | 0      | 1      | 0      | 0      | 0      | 1      | 1      | 0      | 1      | 1      | 0      | 0      | 0      |
| Dechlorosoma       | 1              | 19             | 0      | 0      | 0      | 0      | 0      | 0      | 0      | 0      | 0      | 0      | 0      | 0      | 0      | 1      | 1      | 0      | 0      | 0      |
| Deferribacter      | 2              | 73             | 0      | 0      | 0      | 0      | 0      | 0      | 0      | 0      | 0      | 0      | 0      | 0      | 0      | 1      | 1      | 0      | 0      | 0      |
| Dehalobacter       | 1              | 9              | 0      | 0      | 0      | 0      | 0      | 0      | 0      | 0      | 0      | 0      | 0      | 0      | 0      | 0      | 0      | 0      | 0      | 0      |
| Dehalococcoides    | 2              | 41             | 0      | 0      | 0      | 0      | 0      | 0      | 0      | 0      | 0      | 0      | 0      | 1      | 0      | 0      | 0      | 0      | 0      | 0      |
| Dehalogenimonas    | 1              | 37             | 0      | 0      | 0      | 0      | 0      | 0      | 0      | 0      | 0      | 0      | 0      | 0      | 0      | 0      | 0      | 0      | 0      | 0      |
| Deinococcus        | 2              | 140            | 1      | 0      | 0      | 0      | 1      | 0      | 0      | 1      | 0      | 0      | 0      | 0      | 0      | 1      | 1      | 0      | 0      | 1      |
| Delftia            | 3              | 177            | 0      | 0      | 0      | 1      | 1      | 0      | 0      | 0      | 0      | 0      | 0      | 0      | 0      | 1      | 1      | 0      | 0      | 0      |
| Denitrovibrio      | 2              | 67             | 0      | 0      | 0      | 0      | 0      | 0      | 0      | 0      | 0      | 0      | 0      | 0      | 0      | 1      | 0      | 0      | 0      | 0      |
| Desulfarculus      | 2              | 92             | 0      | 0      | 0      | 0      | 0      | 0      | 0      | 0      | 0      | 0      | 0      | 0      | 0      | 1      | 1      | 0      | 0      | 0      |
| Desulfatibacillum  | 3              | 84             | 0      | 0      | 0      | 0      | 0      | 0      | 0      | 0      | 0      | 0      | 0      | 0      | 0      | 1      | 1      | 0      | 0      | 0      |
| Desulfitobacterium | 2              | 102            | 0      | 0      | 0      | 0      | 0      | 0      | 0      | 0      | 0      | 0      | 0      | 1      | 0      | 1      | 1      | 0      | 0      | 0      |
| Desulfobacca       | 2              | 65             | 0      | 0      | 0      | 0      | 0      | 0      | 0      | 0      | 0      | 0      | 0      | 0      | 0      | 0      | 0      | 0      | 1      | 0      |
| Desulfobacterium   | 2              | 113            | 0      | 0      | 0      | 0      | 0      | 0      | 0      | 0      | 0      | 0      | 0      | 0      | 0      | 1      | 1      | 0      | 0      | 0      |
| Desulfobacula      | 1              | 21             | 0      | 0      | 0      | 0      | 0      | 0      | 0      | 0      | 0      | 0      | 0      | 0      | 0      | 1      | 0      | 0      | 0      | 0      |
| Desulfobulbus      | 2              | 88             | 0      | 0      | 0      | 0      | 0      | 0      | 0      | 0      | 0      | 0      | 0      | 0      | 0      | 1      | 0      | 0      | 0      | 0      |
| Desulfocapsa       | 1              | 9              | 0      | 0      | 0      | 0      | 0      | 0      | 0      | 0      | 0      | 0      | 0      | 0      | 0      | 0      | 0      | 0      | 0      | 0      |
| Desulfococcus      | 2              | 80             | 0      | 0      | 0      | 0      | 0      | 0      | 0      | 0      | 0      | 0      | 0      | 0      | 0      | 1      | 1      | 0      | 0      | 0      |
| Desulfohalobium    | 2              | 52             | 0      | 0      | 0      | 0      | 0      | 0      | 0      | 0      | 0      | 0      | 0      | 0      | 0      | 0      | 0      | 0      | 0      | 0      |
| Desulfomicrobium   | 2              | 65             | 0      | 0      | 0      | 0      | 0      | 0      | 0      | 0      | 0      | 0      | 0      | 0      | 0      | 0      | 0      | 1      | 1      | 0      |
| Desulfomonile      | 1              | 25             | 0      | 0      | 0      | 0      | 0      | 0      | 0      | 0      | 0      | 0      | 0      | 0      | 0      | 1      | 0      | 0      | 0      | 0      |
| Desulforhabdus     | 1              | 2              | 0      | 0      | 0      | 0      | 0      | 0      | 0      | 0      | 0      | 0      | 0      | 0      | 0      | 0      | 0      | 0      | 0      | 0      |
| Desulfosporosinus  | 1              | 30             | 0      | 0      | 0      | 0      | 0      | 0      | 0      | 0      | 0      | 0      | 0      | 1      | 0      | 1      | 0      | 0      | 0      | 0      |
| Desulfotalea       | 2              | 66             | 0      | 0      | 0      | 0      | 0      | 0      | 0      | 0      | 0      | 0      | 0      | 0      | 0      | 0      | 0      | 0      | 0      | 0      |
| Desulfotomaculum   | 2              | 98             | 0      | 0      | 0      | 0      | 0      | 0      | 0      | 0      | 0      | 0      | 0      | 0      | 0      | 1      | 1      | 0      | 0      | 0      |
| Desulfovibrio      | 2              | 144            | 0      | 0      | 0      | 0      | 0      | 0      | 0      | 0      | 0      | 0      | 0      | 1      | 0      | 0      | 0      | 0      | 0      | 1      |
| Desulfurispirillum | 2              | 78             | 0      | 0      | 0      | 0      | 0      | 0      | 0      | 0      | 0      | 0      | 0      | 0      | 0      | 1      | 1      | 0      | 0      | 0      |
| Desulfurivibrio    | 2              | 71             | 0      | 0      | 0      | 0      | 0      | 0      | 0      | 0      | 0      | 0      | 0      | 0      | 0      | 0      | 0      | 0      | 0      | 0      |
| Desulfurobacterium | 2              | 53             | 0      | 0      | 0      | 0      | 0      | 0      | 0      | 0      | 0      | 0      | 0      | 0      | 0      | 0      | 0      | 0      | 0      | 0      |
| Desulfurococcus    | 1              | 11             | 0      | 0      | 0      | 0      | 0      | 0      | 0      | 0      | 0      | 0      | 0      | 0      | 0      | 1      | 0      | 0      | 1      | 1      |
| Diaphorobacter     | 1              | 16             | 0      | 0      | 0      | 0      | 0      | 0      | 0      | 0      | 0      | 0      | 0      | 0      | 0      | 0      | 0      | 0      | 0      | 0      |
| Dichelobacter      | 2              | 45             | 0      | 0      | 0      | 0      | 0      | 0      | 0      | 0      | 0      | 0      | 0      | 0      | 0      | 0      | 0      | 0      | 0      | 1      |
| Dickeya            | 2              | 155            | 0      | 0      | 0      | 0      | 0      | 0      | 0      | 0      | 1      | 0      | 0      | 0      | 0      | 1      | 1      | 1      | 1      | 1      |
| Dictyoglomus       | 2              | 62             | 0      | 0      | 0      | 0      | 0      | 0      | 0      | 0      | 0      | 0      | 0      | 0      | 0      | 0      | 0      | 0      | 0      | 0      |
| Dinoroseobacter    | 3              | 148            | 1      | 1      | 0      | 1      | 1      | 0      | 0      | 0      | 0      | 0      | 0      | 0      | 0      | 1      | 1      | 0      | 0      | 1      |
| Dokdonia           | 1              | 3              | 0      | 0      | 0      | 0      | 0      | 0      | 0      | 0      | 0      | 0      | 0      | 0      | 0      | 0      | 1      | 0      | 0      | 0      |
| Dorea              | 1              | 7              | 0      | 0      | 0      | 0      | 0      | 0      | 0      | 0      | 0      | 0      | 0      | 0      | 0      | 0      | 0      | 0      | 0      | 0      |
| Dyadobacter        | 2              | 83             | 0      | 1      | 0      | 0      | 0      | 0      | 0      | 0      | 0      | 0      | 0      | 0      | 0      | 1      | 1      | 0      | 0      | 0      |
| Echinicola         | 1              | 20             | 0      | 1      | 0      | 0      | 0      | 0      | 0      | 0      | 0      | 0      | 0      | 0      | 0      | 1      | 0      | 0      | 1      | 1      |
| Edwardsiella       | 2              | 126            | 0      | 0      | 0      | 0      | 0      | 0      | 0      | 0      | 0      | 0      | 0      | 0      | 0      | 1      | 0      | 0      | 1      | 1      |
| Eggerthella        | 1              | 51             | 0      | 0      | 0      | 0      | 0      | 0      | 0      | 0      | 0      | 0      | 0      | 1      | 0      | 0      | 0      | 0      | 0      | 0      |
| Ehrlichia          | 2              | 37             | 0      | 0      | 0      | 0      | 0      | 0      | 0      | 0      | 0      | 0      | 0      | 1      | 0      | 0      | 0      | 1      | 0      | 0      |
| Eikenella          | 1              | 4              | 0      | 0      | 0      | 0      | 0      | 0      | 0      | 0      | 0      | 0      | 0      | 0      | 0      | 0      | 0      | 0      | 0      | 0      |
| Elusimicrobium     | 2              | 44             | 0      | 0      | 0      | 0      | 0      | 0      | 0      | 0      | 0      | 0      | 0      | 0      | 0      | 0      | 0      | 0      | 0      | 0      |
| Emticicia          | 1              | 21             | 1      | 1      | 0      | 0      | 1      | 0      | 0      | 0      | 0      | 0      | 0      | 0      | 0      | 1      | 0      | 0      | 0      | 0      |
| Enhydrobacter      | 1              | 1              | 0      | 0      | 0      | 0      | 0      | 0      | 0      | 0      | 0      | 0      | 0      | 0      | 0      | 0      | 0      | 0      | 0      | 0      |
| Ensifer            | 1              | 2              | 0      | 0      | 0      | 0      | 0      | 0      | 0      | 0      | 0      | 0      | 0      | 0      | 0      | 0      | 0      | 0      | 0      | 0      |
| Enterobacter       | 2              | 202            | 1      | 0      | 0      | 1      | 1      | 0      | 0      | 0      | 0      | 0      | 0      | 1      | 0      | 1      | 1      | 1      | 1      | 1      |
| Enterobacteriaceae | 2              | 211            | 1      | 0      | 0      | 1      | 1      | 0      | 0      | 0      | 0      | 0      | 0      | 0      | 0      | 1      | 1      | 0      | 1      | 1      |
| Enterococcus       | 1              | 187            | 1      | 0      | 0      | 0      | 1      | 0      | 0      | 0      | 0      | 0      | 1      | 1      | 0      | 1      | 1      | 1      | 1      | 1      |

| Genus               | Cluster Number | Protein Counts | K00448 | K00451 | K00462 | K00480 | K00481 | K00485 | K00492 | K00493 | K00531 | K00539 | K00569 | K00599 | K00622 | K00626 | K00632 | K00680 | K00757 | K00758 |
|---------------------|----------------|----------------|--------|--------|--------|--------|--------|--------|--------|--------|--------|--------|--------|--------|--------|--------|--------|--------|--------|--------|
| Enterovibrio        | 1              | 15             | 0      | 0      | 0      | 0      | 0      | 0      | 0      | 0      | 0      | 0      | 0      | 0      | 0      | 0      | 0      | 0      | 0      | 0      |
| Erwinia             | 2              | 151            | 0      | 0      | 0      | 0      | 1      | 0      | 0      | 0      | 0      | 0      | 0      | 0      | 0      | 1      | 1      | 0      | 1      | 1      |
| Erysipelothrix      | 1              | 9              | 0      | 0      | 0      | 0      | 0      | 0      | 0      | 0      | 0      | 0      | 0      | 0      | 0      | 1      | 0      | 0      | 0      | 0      |
| Erysipelotrichaceae | 1              | 4              | 0      | 0      | 0      | 0      | 0      | 0      | 0      | 0      | 0      | 0      | 0      | 0      | 0      | 0      | 0      | 0      | 0      | 0      |
| Erythrobacter       | 2              | 80             | 0      | 0      | 0      | 0      | 0      | 0      | 0      | 0      | 0      | 0      | 0      | 0      | 0      | 1      | 0      | 0      | 0      | 0      |
| Escherichia         | 2              | 242            | 1      | 0      | 0      | 1      | 1      | 0      | 0      | 0      | 0      | 0      | 0      | 0      | 0      | 1      | 1      | 1      | 1      | 1      |
| Ethanoligenens      | 2              | 69             | 0      | 0      | 0      | 0      | 0      | 0      | 0      | 0      | 1      | 0      | 0      | 0      | 0      | 0      | 0      | 0      | 1      | 0      |
| Eubacteriaceae      | 1              | 2              | 0      | 0      | 0      | 0      | 0      | 0      | 0      | 0      | 0      | 0      | 0      | 0      | 0      | 0      | 0      | 0      | 0      | 0      |
| Eubacterium         | 2              | 103            | 0      | 0      | 0      | 0      | 0      | 0      | 0      | 0      | 0      | 0      | 0      | 1      | 0      | 1      | 0      | 0      | 1      | 0      |
| Eudoraea            | 1              | 4              | 0      | 0      | 0      | 0      | 0      | 0      | 0      | 0      | 0      | 0      | 0      | 0      | 0      | 0      | 0      | 0      | 0      | 0      |
| Euryarchaeota       | 1              | 1              | 0      | 0      | 0      | 0      | 0      | 0      | 0      | 0      | 0      | 0      | 0      | 0      | 0      | 1      | 0      | 0      | 0      | 0      |
| Exiguobacterium     | 2              | 93             | 0      | 0      | 0      | 0      | 0      | 0      | 0      | 0      | 0      | 0      | 0      | 1      | 0      | 1      | 1      | 1      | 0      | 0      |
| Faecalibacterium    | 1              | 12             | 0      | 0      | 0      | 0      | 0      | 0      | 0      | 0      | 0      | 0      | 0      | 0      | 0      | 1      | 0      | 0      | 0      | 0      |
| Ferrimonas          | 2              | 115            | 0      | 1      | 0      | 0      | 0      | 0      | 0      | 0      | 0      | 0      | 1      | 0      | 0      | 1      | 1      | 0      | 1      | 1      |
| Ferroglobus         | 1              | 14             | 0      | 0      | 0      | 0      | 0      | 0      | 0      | 0      | 0      | 0      | 0      | 0      | 0      | 1      | 0      | 0      | 0      | 1      |
| Ferroplasma         | 1              | 11             | 0      | 1      | 0      | 0      | 0      | 0      | 0      | 0      | 0      | 0      | 0      | 0      | 0      | 1      | 0      | 0      | 0      | 0      |
| Fervidicoccus       | 1              | 7              | 0      | 0      | 0      | 0      | 0      | 0      | 0      | 0      | 0      | 0      | 0      | 0      | 0      | 1      | 0      | 0      | 1      | 0      |
| Fervidobacterium    | 2              | 54             | 0      | 0      | 0      | 0      | 0      | 0      | 0      | 0      | 0      | 0      | 0      | 0      | 0      | 1      | 0      | 0      | 0      | 0      |
| Fibrella            | 1              | 17             | 0      | 1      | 0      | 0      | 0      | 0      | 0      | 0      | 0      | 0      | 0      | 0      | 0      | 1      | 0      | 0      | 0      | 0      |
| Fibroacter          | 2              | 52             | 0      | 0      | 0      | 0      | 0      | 0      | 0      | 0      | 0      | 0      | 0      | 0      | 0      | 0      | 0      | 0      | 0      | 0      |
| Filifactor          | 1              | 9              | 0      | 0      | 0      | 0      | 0      | 0      | 0      | 0      | 0      | 0      | 0      | 0      | 0      | 1      | 0      | 0      | 0      | 0      |
| Finegoldia          | 2              | 55             | 0      | 0      | 0      | 0      | 0      | 0      | 0      | 0      | 0      | 0      | 0      | 0      | 0      | 0      | 0      | 0      | 1      | 0      |
| Firmicutes          | 1              | 15             | 0      | 0      | 0      | 0      | 0      | 0      | 0      | 0      | 0      | 0      | 0      | 0      | 0      | 0      | 0      | 1      | 0      | 0      |
| Fischerella         | 1              | 15             | 0      | 0      | 0      | 0      | 0      | 0      | 0      | 0      | 0      | 0      | 0      | 0      | 0      | 0      | 0      | 0      | 0      | 0      |
| Flavobacteria       | 1              | 7              | 0      | 0      | 0      | 0      | 0      | 0      | 0      | 0      | 0      | 0      | 0      | 0      | 0      | 0      | 0      | 0      | 0      | 0      |
| Flavobacteriaceae   | 2              | 69             | 0      | 1      | 0      | 0      | 0      | 0      | 0      | 0      | 0      | 0      | 0      | 0      | 0      | 1      | 1      | 0      | 1      | 0      |
| Flavobacteriales    | 1              | 3              | 0      | 0      | 0      | 0      | 0      | 0      | 0      | 0      | 0      | 0      | 0      | 0      | 0      | 0      | 0      | 0      | 0      | 0      |
| Flavobacterium      | 2              | 103            | 0      | 1      | 0      | 0      | 0      | 0      | 0      | 0      | 0      | 0      | 0      | 0      | 0      | 1      | 1      | 1      | 1      | 0      |
| Flexibacter         | 1              | 17             | 0      | 1      | 0      | 0      | 0      | 0      | 0      | 0      | 0      | 0      | 0      | 0      | 0      | 1      | 0      | 0      | 1      | 0      |
| Flexistipes         | 1              | 11             | 0      | 0      | 0      | 0      | 0      | 0      | 0      | 0      | 0      | 0      | 0      | 0      | 0      | 1      | 1      | 0      | 0      | 0      |
| Fluoribacter        | 1              | 6              | 0      | 0      | 0      | 0      | 0      | 0      | 0      | 0      | 0      | 0      | 0      | 0      | 0      | 0      | 0      | 0      | 0      | 0      |
| Fluviicola          | 2              | 69             | 0      | 1      | 0      | 0      | 0      | 0      | 0      | 0      | 0      | 0      | 0      | 1      | 0      | 1      | 1      | 0      | 1      | 0      |
| Formosa             | 1              | 2              | 0      | 0      | 0      | 0      | 0      | 0      | 0      | 0      | 0      | 0      | 0      | 0      | 0      | 0      | 0      | 0      | 0      | 0      |
| Francisella         | 2              | 88             | 0      | 0      | 0      | 0      | 0      | 0      | 0      | 1      | 0      | 0      | 1      | 1      | 0      | 0      | 1      | 1      | 1      | 0      |
| Frankia             | 3              | 202            | 1      | 1      | 0      | 1      | 1      | 0      | 0      | 1      | 0      | 0      | 0      | 1      | 0      | 1      | 1      | 1      | 0      | 1      |
| Frateuria           | 1              | 25             | 0      | 0      | 0      | 1      | 0      | 0      | 0      | 0      | 0      | 0      | 0      | 0      | 0      | 1      | 1      | 0      | 0      | 0      |
| Fructobacillus      | 1              | 2              | 0      | 0      | 0      | 0      | 0      | 0      | 0      | 0      | 0      | 0      | 0      | 0      | 0      | 0      | 0      | 0      | 0      | 0      |
| Fulvimarina         | 1              | 2              | 0      | 0      | 0      | 0      | 0      | 0      | 0      | 0      | 0      | 0      | 0      | 0      | 0      | 0      | 0      | 0      | 0      | 0      |
| Fusobacterium       | 1              | 48             | 0      | 0      | 0      | 0      | 0      | 0      | 0      | 0      | 0      | 0      | 0      | 1      | 0      | 1      | 0      | 1      | 0      | 0      |
| Gallibacterium      | 2              | 87             | 0      | 0      | 0      | 0      | 0      | 0      | 0      | 0      | 0      | 0      | 0      | 0      | 0      | 0      | 1      | 0      | 1      | 0      |
| Gallionella         | 2              | 67             | 0      | 0      | 0      | 0      | 0      | 0      | 0      | 0      | 0      | 0      | 0      | 0      | 0      | 0      | 1      | 0      | 0      | 0      |
| Gammaproteobacteria | 1              | 9              | 0      | 0      | 0      | 0      | 0      | 0      | 0      | 0      | 0      | 0      | 0      | 0      | 0      | 0      | 0      | 1      | 0      | 0      |
| Gardnerella         | 1              | 31             | 0      | 0      | 0      | 0      | 0      | 0      | 0      | 0      | 0      | 0      | 0      | 1      | 0      | 1      | 0      | 0      | 0      | 0      |
| Geitlerinema        | 1              | 9              | 0      | 0      | 0      | 0      | 0      | 0      | 0      | 0      | 0      | 0      | 0      | 0      | 0      | 0      | 0      | 0      | 0      | 0      |
| Gemmatimonas        | 2              | 93             | 0      | 1      | 0      | 0      | 0      | 0      | 0      | 0      | 0      | 0      | 0      | 1      | 0      | 1      | 1      | 0      | 0      | 0      |
| Geobacillus         | 2              | 168            | 0      | 0      | 0      | 1      | 0      | 0      | 0      | 0      | 0      | 0      | 0      | 1      | 0      | 1      | 1      | 0      | 0      | 0      |
| Geobacter           | 2              | 150            | 0      | 0      | 0      | 0      | 0      | 0      | 0      | 0      | 0      | 0      | 0      | 0      | 0      | 1      | 1      | 0      | 1      | 0      |
| Geodermatophilus    | 2              | 136            | 1      | 1      | 0      | 0      | 1      | 0      | 0      | 0      | 0      | 0      | 0      | 1      | 0      | 1      | 1      | 0      | 0      | 1      |
| Geopsychrobacter    | 1              | 2              | 0      | 0      | 0      | 0      | 0      | 0      | 0      | 0      | 0      | 0      | 0      | 0      | 0      | 0      | 0      | 0      | 0      | 0      |
| Gillisia            | 1              | 11             | 0      | 1      | 0      | 0      | 0      | 0      | 0      | 0      | 0      | 0      | 0      | 0      | 0      | 0      | 0      | 0      | 0      | 0      |
| Gilvimarinus        | 1              | 4              | 0      | 0      | 0      | 0      | 0      | 0      | 0      | 0      | 0      | 0      | 0      | 0      | 0      | 0      | 0      | 0      | 0      | 0      |
| Glaciecola          | 2              | 117            | 0      | 1      | 0      | 1      | 0      | 0      | 0      | 0      | 0      | 0      | 1      | 0      | 0      | 1      | 1      | 0      | 0      | 0      |

| Genus             | Cluster Number | Protein Counts | K00448 | K00451 | K00462 | K00480 | K00481 | K00485 | K00492 | K00493 | K00531 | K00539 | K00569 | K00599 | K00622 | K00626 | K00632 | K00680 | K00757 | K00758 |
|-------------------|----------------|----------------|--------|--------|--------|--------|--------|--------|--------|--------|--------|--------|--------|--------|--------|--------|--------|--------|--------|--------|
| Gloeobacter       | 2              | 67             | 0      | 0      | 0      | 0      | 0      | 0      | 0      | 0      | 0      | 0      | 0      | 1      | 0      | 0      | 0      | 0      | 0      | 0      |
| Gloeocapsa        | 1              | 20             | 0      | 0      | 0      | 0      | 0      | 0      | 0      | 0      | 0      | 0      | 0      | 0      | 0      | 0      | 0      | 0      | 0      | 0      |
| Gloeotheca        | 1              | 1              | 0      | 0      | 0      | 0      | 0      | 0      | 0      | 0      | 0      | 0      | 0      | 0      | 0      | 0      | 0      | 0      | 0      | 0      |
| Gluconacetobacter | 2              | 96             | 0      | 0      | 0      | 0      | 0      | 0      | 0      | 0      | 0      | 0      | 1      | 0      | 0      | 1      | 0      | 0      | 1      | 0      |
| Gluconobacter     | 2              | 76             | 0      | 0      | 0      | 0      | 0      | 0      | 0      | 0      | 0      | 0      | 1      | 1      | 0      | 0      | 0      | 1      | 0      | 0      |
| Gordonia          | 1              | 158            | 1      | 1      | 0      | 1      | 1      | 0      | 0      | 1      | 0      | 0      | 0      | 1      | 0      | 1      | 1      | 0      | 0      | 1      |
| Gordonibacter     | 1              | 32             | 0      | 0      | 0      | 0      | 0      | 0      | 0      | 0      | 0      | 0      | 0      | 0      | 0      | 0      | 0      | 0      | 0      | 0      |
| Gramella          | 2              | 104            | 0      | 1      | 0      | 0      | 0      | 0      | 0      | 0      | 0      | 0      | 1      | 1      | 0      | 1      | 1      | 1      | 0      | 0      |
| Granulibacter     | 2              | 90             | 0      | 0      | 0      | 0      | 0      | 1      | 0      | 0      | 0      | 0      | 0      | 1      | 0      | 1      | 0      | 1      | 0      | 0      |
| Granulicella      | 2              | 98             | 0      | 1      | 0      | 0      | 0      | 0      | 0      | 0      | 0      | 0      | 0      | 0      | 0      | 1      | 1      | 0      | 0      | 0      |
| Grimontia         | 1              | 9              | 0      | 0      | 0      | 0      | 0      | 0      | 0      | 0      | 0      | 0      | 0      | 0      | 0      | 0      | 0      | 0      | 0      | 0      |
| Haemophilus       | 2              | 117            | 0      | 0      | 0      | 0      | 0      | 0      | 1      | 0      | 0      | 0      | 0      | 0      | 0      | 1      | 1      | 0      | 1      | 0      |
| Hafnia            | 1              | 29             | 0      | 0      | 0      | 0      | 0      | 0      | 0      | 0      | 0      | 0      | 0      | 0      | 0      | 0      | 0      | 0      | 1      | 0      |
| Hahella           | 3              | 130            | 0      | 1      | 0      | 0      | 0      | 0      | 0      | 0      | 0      | 0      | 1      | 0      | 0      | 1      | 1      | 0      | 0      | 1      |
| Halalkalicoccus   | 1              | 18             | 0      | 0      | 0      | 0      | 0      | 0      | 0      | 0      | 0      | 0      | 0      | 0      | 0      | 1      | 1      | 0      | 1      | 0      |
| Halanaerobium     | 2              | 89             | 0      | 0      | 0      | 0      | 0      | 0      | 0      | 0      | 0      | 0      | 0      | 0      | 0      | 1      | 0      | 0      | 1      | 0      |
| Haliangium        | 2              | 108            | 0      | 1      | 0      | 0      | 0      | 0      | 0      | 0      | 0      | 0      | 1      | 0      | 0      | 1      | 1      | 0      | 0      | 0      |
| Haliscomenobacter | 2              | 107            | 1      | 1      | 0      | 0      | 1      | 0      | 0      | 0      | 0      | 0      | 0      | 0      | 0      | 1      | 1      | 0      | 1      | 0      |
| Haloarcula        | 1              | 22             | 0      | 0      | 0      | 0      | 1      | 0      | 0      | 0      | 0      | 0      | 0      | 1      | 0      | 1      | 1      | 0      | 1      | 0      |
| Halobacillus      | 1              | 19             | 0      | 0      | 0      | 0      | 0      | 0      | 0      | 0      | 0      | 0      | 0      | 0      | 0      | 1      | 1      | 0      | 0      | 0      |
| Halobacteriaceae  | 1              | 1              | 0      | 0      | 0      | 0      | 0      | 0      | 0      | 0      | 0      | 0      | 0      | 0      | 0      | 1      | 0      | 0      | 0      | 0      |
| Halobacterium     | 1              | 10             | 0      | 0      | 0      | 0      | 0      | 0      | 0      | 0      | 0      | 0      | 0      | 0      | 0      | 0      | 1      | 0      | 1      | 0      |
| Halobacteroides   | 1              | 14             | 0      | 0      | 0      | 0      | 0      | 0      | 0      | 0      | 0      | 0      | 0      | 0      | 0      | 1      | 0      | 0      | 0      | 0      |
| Haloferax         | 1              | 20             | 0      | 0      | 0      | 0      | 0      | 0      | 0      | 0      | 0      | 0      | 0      | 0      | 0      | 1      | 1      | 0      | 1      | 1      |
| Halogeometricum   | 1              | 12             | 0      | 0      | 0      | 0      | 0      | 0      | 0      | 0      | 0      | 0      | 0      | 0      | 0      | 1      | 1      | 0      | 1      | 1      |
| Halomicrobium     | 1              | 10             | 0      | 0      | 0      | 0      | 0      | 0      | 0      | 0      | 0      | 0      | 0      | 0      | 0      | 1      | 1      | 0      | 1      | 0      |
| Halomonas         | 1              | 149            | 1      | 1      | 0      | 0      | 1      | 0      | 0      | 0      | 0      | 0      | 1      | 0      | 0      | 1      | 1      | 0      | 0      | 1      |
| Halopiger         | 1              | 16             | 0      | 0      | 0      | 0      | 0      | 0      | 0      | 0      | 0      | 0      | 0      | 0      | 0      | 1      | 1      | 0      | 1      | 0      |
| Haloquadratum     | 1              | 19             | 0      | 0      | 0      | 0      | 0      | 0      | 0      | 0      | 0      | 0      | 0      | 1      | 0      | 1      | 1      | 1      | 1      | 0      |
| Halorhabdus       | 1              | 10             | 0      | 0      | 0      | 0      | 0      | 0      | 0      | 0      | 0      | 0      | 0      | 0      | 0      | 1      | 0      | 0      | 1      | 0      |
| Halorhodospira    | 2              | 71             | 0      | 0      | 0      | 0      | 0      | 0      | 0      | 0      | 0      | 0      | 0      | 0      | 0      | 1      | 0      | 0      | 0      | 0      |
| Halorubrum        | 1              | 16             | 0      | 0      | 0      | 0      | 0      | 0      | 0      | 0      | 0      | 0      | 0      | 0      | 0      | 1      | 1      | 0      | 1      | 0      |
| Haloterrigena     | 1              | 19             | 0      | 0      | 0      | 0      | 0      | 0      | 0      | 0      | 0      | 0      | 0      | 0      | 0      | 1      | 1      | 0      | 1      | 0      |
| Halothece         | 1              | 9              | 0      | 0      | 0      | 0      | 0      | 0      | 0      | 0      | 0      | 0      | 0      | 0      | 0      | 0      | 0      | 0      | 0      | 0      |
| Halothermothrix   | 2              | 50             | 0      | 0      | 0      | 0      | 0      | 0      | 0      | 0      | 0      | 0      | 0      | 0      | 0      | 0      | 0      | 0      | 0      | 0      |
| Halothiobacillus  | 2              | 65             | 0      | 0      | 0      | 0      | 0      | 0      | 0      | 0      | 0      | 0      | 0      | 0      | 0      | 0      | 0      | 0      | 0      | 0      |
| Halovivax         | 1              | 12             | 0      | 0      | 0      | 0      | 0      | 0      | 0      | 0      | 0      | 0      | 0      | 0      | 0      | 1      | 0      | 0      | 1      | 0      |
| Helicobacter      | 2              | 79             | 0      | 0      | 0      | 0      | 0      | 0      | 0      | 0      | 0      | 0      | 0      | 1      | 0      | 1      | 0      | 1      | 0      | 0      |
| Heliobacillus     | 1              | 4              | 0      | 0      | 0      | 0      | 0      | 0      | 0      | 0      | 0      | 0      | 0      | 0      | 0      | 0      | 0      | 0      | 0      | 0      |
| Heliobacterium    | 2              | 51             | 0      | 0      | 0      | 0      | 0      | 0      | 0      | 0      | 0      | 0      | 0      | 0      | 0      | 1      | 1      | 0      | 0      | 0      |
| Herbaspirillum    | 2              | 172            | 1      | 1      | 0      | 0      | 1      | 0      | 0      | 0      | 0      | 0      | 1      | 0      | 0      | 1      | 1      | 0      | 0      | 0      |
| Herminiimonas     | 3              | 89             | 0      | 0      | 0      | 0      | 0      | 1      | 0      | 0      | 0      | 0      | 0      | 0      | 0      | 1      | 1      | 0      | 0      | 0      |
| Herpetosiphon     | 3              | 90             | 0      | 1      | 0      | 0      | 0      | 0      | 0      | 0      | 0      | 0      | 1      | 1      | 0      | 1      | 1      | 0      | 0      | 0      |
| Hippea            | 2              | 44             | 0      | 0      | 0      | 0      | 0      | 0      | 0      | 0      | 0      | 0      | 0      | 0      | 0      | 1      | 0      | 0      | 0      | 0      |
| Hirschia          | 2              | 102            | 0      | 0      | 0      | 1      | 0      | 0      | 0      | 0      | 0      | 0      | 0      | 0      | 0      | 1      | 0      | 0      | 0      | 0      |
| Histophilus       | 2              | 72             | 0      | 0      | 0      | 0      | 0      | 0      | 1      | 0      | 0      | 0      | 0      | 0      | 0      | 1      | 0      | 0      | 1      | 0      |
| Hoeflea           | 1              | 16             | 0      | 0      | 0      | 0      | 0      | 0      | 0      | 0      | 0      | 0      | 0      | 0      | 0      | 0      | 1      | 0      | 0      | 0      |
| Hydrogenivirga    | 1              | 2              | 0      | 0      | 0      | 0      | 0      | 0      | 0      | 0      | 0      | 0      | 0      | 0      | 0      | 0      | 0      | 0      | 0      | 0      |
| Hydrogenobacter   | 2              | 55             | 0      | 0      | 0      | 0      | 0      | 0      | 0      | 0      | 0      | 0      | 0      | 0      | 0      | 0      | 0      | 0      | 0      | 0      |
| Hydrogenobaculum  | 2              | 44             | 0      | 0      | 0      | 0      | 0      | 0      | 0      | 0      | 0      | 0      | 0      | 0      | 0      | 0      | 0      | 0      | 0      | 0      |
| Hydrogenophaga    | 1              | 9              | 0      | 0      | 0      | 0      | 0      | 0      | 0      | 0      | 0      | 0      | 0      | 0      | 0      | 1      | 0      | 0      | 0      | 1      |
| Hylemonella       | 1              | 4              | 0      | 0      | 0      | 0      | 0      | 0      | 0      | 0      | 0      | 0      | 0      | 0      | 0      | 0      | 0      | 0      | 0      | 0      |



| Genus                 | Cluster Number | Protein Counts | K00448 | K00451 | K00462 | K00480 | K00481 | K00485 | K00492 | K00493 | K00531 | K00539 | K00569 | K00599 | K00622 | K00626 | K00632 | K00680 | K00757 | K00758 |
|-----------------------|----------------|----------------|--------|--------|--------|--------|--------|--------|--------|--------|--------|--------|--------|--------|--------|--------|--------|--------|--------|--------|
| Hyperthermus          | 1              | 6              | 0      | 0      | 0      | 0      | 0      | 0      | 0      | 0      | 0      | 0      | 0      | 0      | 0      | 0      | 1      | 0      | 1      | 1      |
| Hyphomicrobium        | 2              | 93             | 0      | 0      | 0      | 1      | 0      | 0      | 0      | 0      | 0      | 0      | 1      | 0      | 0      | 1      | 0      | 0      | 0      | 0      |
| Hyphomonas            | 3              | 105            | 0      | 0      | 0      | 1      | 0      | 0      | 0      | 0      | 0      | 0      | 0      | 0      | 0      | 1      | 0      | 1      | 0      | 0      |
| Ideonella             | 1              | 18             | 0      | 0      | 0      | 0      | 0      | 0      | 0      | 0      | 0      | 0      | 0      | 0      | 0      | 0      | 0      | 0      | 0      | 0      |
| Idiomarina            | 2              | 86             | 0      | 1      | 0      | 0      | 0      | 0      | 0      | 0      | 0      | 0      | 0      | 0      | 0      | 1      | 1      | 0      | 0      | 1      |
| Ignavibacterium       | 1              | 14             | 0      | 1      | 0      | 0      | 0      | 0      | 0      | 0      | 0      | 0      | 0      | 0      | 0      | 1      | 0      | 0      | 0      | 0      |
| Ignicoccus            | 1              | 5              | 0      | 0      | 0      | 0      | 0      | 0      | 0      | 0      | 0      | 0      | 0      | 0      | 0      | 1      | 0      | 0      | 0      | 0      |
| Ignisphaera           | 1              | 8              | 0      | 0      | 0      | 0      | 0      | 0      | 0      | 0      | 0      | 0      | 0      | 0      | 0      | 1      | 0      | 0      | 0      | 0      |
| Ilyobacter            | 2              | 85             | 0      | 0      | 0      | 0      | 0      | 0      | 0      | 0      | 0      | 0      | 0      | 1      | 0      | 1      | 0      | 0      | 0      | 0      |
| Intrasporangium       | 2              | 114            | 0      | 1      | 0      | 1      | 0      | 0      | 0      | 0      | 0      | 0      | 0      | 1      | 0      | 1      | 1      | 0      | 0      | 1      |
| Isoptricola           | 1              | 18             | 0      | 0      | 0      | 0      | 0      | 0      | 0      | 0      | 0      | 0      | 0      | 1      | 0      | 1      | 1      | 0      | 0      | 1      |
| Isosphaera            | 2              | 75             | 0      | 0      | 0      | 0      | 0      | 0      | 0      | 0      | 0      | 0      | 0      | 1      | 0      | 1      | 0      | 0      | 0      | 0      |
| Jannaschia            | 3              | 151            | 1      | 1      | 0      | 1      | 1      | 0      | 0      | 0      | 0      | 0      | 0      | 0      | 0      | 1      | 0      | 0      | 0      | 1      |
| Janthinobacterium     | 2              | 99             | 0      | 0      | 0      | 0      | 0      | 0      | 0      | 0      | 0      | 0      | 0      | 0      | 0      | 1      | 1      | 0      | 0      | 0      |
| Jonesia               | 2              | 56             | 0      | 0      | 0      | 0      | 0      | 0      | 0      | 0      | 0      | 0      | 0      | 1      | 0      | 1      | 1      | 0      | 0      | 1      |
| Joostella             | 1              | 3              | 0      | 0      | 0      | 0      | 0      | 0      | 0      | 0      | 0      | 0      | 0      | 0      | 0      | 0      | 0      | 0      | 0      | 0      |
| Kaistia               | 1              | 2              | 0      | 0      | 0      | 0      | 0      | 0      | 0      | 0      | 0      | 0      | 0      | 0      | 0      | 0      | 0      | 0      | 0      | 0      |
| Kangiella             | 2              | 84             | 0      | 1      | 0      | 0      | 0      | 0      | 0      | 0      | 0      | 0      | 1      | 0      | 0      | 1      | 1      | 0      | 0      | 1      |
| Ketogulonicigenium    | 2              | 102            | 1      | 0      | 0      | 1      | 1      | 0      | 0      | 0      | 0      | 0      | 0      | 0      | 0      | 0      | 0      | 0      | 0      | 1      |
| Kineococcus           | 1              | 24             | 0      | 0      | 0      | 0      | 0      | 0      | 0      | 0      | 0      | 0      | 0      | 1      | 0      | 1      | 1      | 0      | 0      | 1      |
| Kinetoplastibacterium | 1              | 2              | 0      | 0      | 0      | 0      | 0      | 0      | 0      | 0      | 0      | 0      | 0      | 0      | 0      | 0      | 0      | 0      | 0      | 0      |
| Kingella              | 1              | 4              | 0      | 0      | 0      | 0      | 0      | 0      | 0      | 0      | 0      | 0      | 0      | 0      | 0      | 0      | 0      | 0      | 0      | 0      |
| Kitasatospora         | 1              | 36             | 0      | 1      | 0      | 1      | 1      | 0      | 0      | 0      | 0      | 0      | 0      | 0      | 0      | 1      | 0      | 0      | 0      | 1      |
| Klebsiella            | 3              | 222            | 1      | 0      | 0      | 1      | 1      | 0      | 0      | 0      | 0      | 0      | 0      | 1      | 0      | 1      | 1      | 1      | 1      | 1      |
| Kluyvera              | 1              | 1              | 0      | 0      | 0      | 0      | 0      | 0      | 0      | 0      | 0      | 0      | 0      | 0      | 0      | 0      | 0      | 0      | 0      | 0      |
| Kocuria               | 2              | 87             | 1      | 0      | 0      | 0      | 0      | 0      | 1      | 0      | 0      | 0      | 0      | 1      | 0      | 1      | 0      | 0      | 0      | 1      |
| Kordia                | 1              | 5              | 0      | 0      | 0      | 0      | 0      | 0      | 0      | 0      | 0      | 0      | 0      | 0      | 0      | 0      | 1      | 0      | 0      | 0      |
| Kosmotoga             | 2              | 61             | 0      | 0      | 0      | 0      | 0      | 0      | 0      | 0      | 0      | 0      | 0      | 0      | 0      | 1      | 0      | 0      | 1      | 0      |
| Kribbella             | 2              | 99             | 0      | 1      | 0      | 0      | 0      | 0      | 0      | 0      | 0      | 0      | 0      | 1      | 0      | 1      | 1      | 0      | 0      | 1      |
| Krokinobacter         | 2              | 90             | 0      | 1      | 0      | 0      | 0      | 0      | 0      | 0      | 0      | 0      | 0      | 0      | 0      | 1      | 1      | 0      | 1      | 0      |
| Kyrpidia              | 2              | 113            | 0      | 1      | 0      | 0      | 0      | 0      | 0      | 0      | 0      | 0      | 0      | 1      | 0      | 1      | 1      | 0      | 0      | 0      |
| Kytococcus            | 2              | 70             | 0      | 1      | 0      | 0      | 0      | 0      | 0      | 0      | 0      | 0      | 0      | 1      | 0      | 1      | 0      | 0      | 0      | 1      |
| Labrenzia             | 1              | 4              | 0      | 0      | 0      | 0      | 0      | 0      | 0      | 0      | 0      | 0      | 0      | 0      | 0      | 0      | 0      | 0      | 0      | 0      |
| Lachnoanaerobaculum   | 1              | 1              | 0      | 0      | 0      | 0      | 0      | 0      | 0      | 0      | 0      | 0      | 0      | 0      | 0      | 0      | 0      | 0      | 0      | 0      |
| Lachnospiraceae       | 1              | 51             | 0      | 0      | 0      | 0      | 0      | 0      | 0      | 0      | 0      | 0      | 0      | 0      | 0      | 1      | 0      | 1      | 0      | 0      |
| Lacinutrix            | 1              | 20             | 0      | 1      | 0      | 0      | 0      | 0      | 0      | 0      | 0      | 0      | 0      | 0      | 0      | 1      | 1      | 0      | 1      | 0      |
| Lactobacillus         | 2              | 119            | 0      | 0      | 0      | 0      | 0      | 0      | 0      | 0      | 0      | 0      | 0      | 1      | 0      | 1      | 0      | 1      | 1      | 0      |
| Lactococcus           | 2              | 82             | 0      | 0      | 0      | 0      | 0      | 0      | 0      | 0      | 0      | 0      | 0      | 1      | 0      | 1      | 0      | 1      | 1      | 0      |
| Lamprocystis          | 1              | 2              | 0      | 0      | 0      | 0      | 0      | 0      | 0      | 0      | 0      | 0      | 0      | 0      | 0      | 0      | 0      | 0      | 0      | 0      |
| Laribacter            | 2              | 80             | 0      | 0      | 0      | 0      | 0      | 0      | 0      | 0      | 0      | 0      | 0      | 0      | 0      | 1      | 1      | 0      | 0      | 0      |
| Lawsonia              | 2              | 33             | 0      | 0      | 0      | 0      | 0      | 0      | 0      | 0      | 0      | 0      | 0      | 1      | 0      | 0      | 0      | 0      | 0      | 0      |
| Leadbetterella        | 2              | 79             | 0      | 1      | 0      | 0      | 0      | 0      | 0      | 0      | 0      | 0      | 0      | 0      | 0      | 1      | 1      | 0      | 1      | 0      |
| Leeuwenhoekiiella     | 1              | 2              | 0      | 0      | 0      | 0      | 0      | 0      | 0      | 0      | 0      | 0      | 0      | 0      | 0      | 0      | 0      | 0      | 0      | 0      |
| Legionella            | 2              | 117            | 0      | 1      | 0      | 0      | 0      | 0      | 0      | 0      | 0      | 0      | 1      | 1      | 0      | 1      | 1      | 0      | 1      | 1      |
| Leifsonia             | 2              | 48             | 0      | 0      | 0      | 0      | 0      | 0      | 0      | 0      | 0      | 0      | 0      | 1      | 0      | 0      | 1      | 0      | 0      | 1      |
| Leptolyngbya          | 1              | 10             | 0      | 0      | 0      | 1      | 0      | 0      | 0      | 0      | 0      | 0      | 0      | 0      | 0      | 0      | 0      | 0      | 0      | 0      |
| Leptospira            | 2              | 76             | 0      | 0      | 0      | 0      | 0      | 0      | 0      | 0      | 0      | 0      | 1      | 1      | 0      | 1      | 1      | 0      | 0      | 0      |
| Leptospirillum        | 1              | 10             | 0      | 0      | 0      | 0      | 0      | 0      | 0      | 0      | 0      | 0      | 0      | 0      | 0      | 0      | 0      | 0      | 0      | 0      |
| Leptothrix            | 3              | 186            | 0      | 1      | 0      | 1      | 1      | 1      | 0      | 0      | 0      | 0      | 0      | 0      | 0      | 1      | 1      | 0      | 0      | 1      |
| Leptotrichia          | 2              | 43             | 0      | 0      | 0      | 0      | 0      | 0      | 0      | 0      | 0      | 0      | 0      | 1      | 0      | 0      | 0      | 0      | 0      | 0      |
| Leucobacter           | 1              | 2              | 0      | 0      | 0      | 0      | 0      | 0      | 0      | 0      | 0      | 0      | 0      | 0      | 0      | 0      | 0      | 0      | 0      | 0      |
| Leuconostoc           | 2              | 64             | 0      | 0      | 0      | 0      | 0      | 0      | 0      | 0      | 0      | 0      | 0      | 1      | 0      | 1      | 0      | 0      | 0      | 0      |

| Genus                | Cluster Number | Protein Counts | K00448 | K00451 | K00462 | K00480 | K00481 | K00485 | K00492 | K00493 | K00531 | K00539 | K00569 | K00599 | K00622 | K00626 | K00632 | K00680 | K00757 | K00758 |
|----------------------|----------------|----------------|--------|--------|--------|--------|--------|--------|--------|--------|--------|--------|--------|--------|--------|--------|--------|--------|--------|--------|
| Liberibacter         | 1              | 4              | 0      | 0      | 0      | 1      | 0      | 0      | 0      | 0      | 0      | 0      | 0      | 0      | 0      | 0      | 0      | 0      | 0      | 0      |
| Limnohabitans        | 1              | 11             | 0      | 0      | 0      | 0      | 0      | 0      | 0      | 0      | 0      | 0      | 0      | 0      | 0      | 0      | 0      | 0      | 0      | 0      |
| Listeria             | 2              | 77             | 0      | 0      | 0      | 0      | 0      | 0      | 0      | 0      | 0      | 0      | 0      | 1      | 0      | 1      | 0      | 1      | 0      | 0      |
| Listeriaceae         | 1              | 6              | 0      | 0      | 0      | 0      | 0      | 0      | 0      | 0      | 0      | 0      | 0      | 0      | 0      | 0      | 0      | 0      | 0      | 0      |
| Listonella           | 1              | 38             | 0      | 1      | 0      | 0      | 0      | 0      | 0      | 0      | 0      | 0      | 1      | 0      | 0      | 0      | 1      | 0      | 1      | 1      |
| Loktanella           | 1              | 3              | 0      | 0      | 0      | 0      | 0      | 0      | 0      | 0      | 0      | 0      | 0      | 0      | 0      | 1      | 0      | 0      | 0      | 0      |
| Lysinibacillus       | 2              | 97             | 0      | 0      | 0      | 0      | 0      | 0      | 0      | 0      | 0      | 0      | 0      | 1      | 0      | 1      | 1      | 0      | 0      | 0      |
| Macrococcus          | 2              | 60             | 0      | 0      | 0      | 0      | 0      | 0      | 0      | 0      | 0      | 0      | 0      | 1      | 0      | 0      | 0      | 0      | 0      | 0      |
| Magnetococcus        | 2              | 64             | 0      | 0      | 0      | 0      | 0      | 0      | 0      | 0      | 0      | 0      | 1      | 0      | 0      | 1      | 0      | 0      | 0      | 0      |
| Magnetospirillum     | 2              | 113            | 0      | 0      | 0      | 0      | 1      | 0      | 0      | 0      | 0      | 0      | 0      | 0      | 0      | 1      | 0      | 0      | 0      | 0      |
| Mahella              | 2              | 58             | 0      | 0      | 0      | 0      | 0      | 0      | 0      | 0      | 0      | 0      | 0      | 0      | 0      | 0      | 0      | 0      | 0      | 0      |
| Mannheimia           | 2              | 85             | 0      | 0      | 0      | 0      | 0      | 0      | 0      | 0      | 0      | 0      | 0      | 0      | 0      | 0      | 0      | 1      | 1      | 0      |
| Maribacter           | 3              | 87             | 0      | 1      | 0      | 0      | 0      | 0      | 0      | 0      | 0      | 0      | 0      | 0      | 0      | 1      | 1      | 0      | 1      | 0      |
| Maricaulis           | 3              | 87             | 0      | 0      | 0      | 0      | 0      | 0      | 0      | 0      | 0      | 0      | 0      | 0      | 0      | 1      | 0      | 0      | 0      | 1      |
| Marichromatium       | 1              | 2              | 0      | 0      | 0      | 0      | 0      | 0      | 0      | 0      | 0      | 0      | 0      | 0      | 0      | 0      | 0      | 0      | 0      | 0      |
| Marinithermus        | 2              | 77             | 0      | 0      | 0      | 0      | 0      | 0      | 0      | 0      | 0      | 0      | 0      | 0      | 0      | 1      | 1      | 0      | 0      | 0      |
| Marinitoga           | 1              | 15             | 0      | 0      | 0      | 0      | 0      | 0      | 0      | 0      | 0      | 0      | 0      | 0      | 0      | 1      | 0      | 0      | 1      | 0      |
| Marinobacter         | 2              | 163            | 1      | 0      | 0      | 0      | 0      | 0      | 0      | 0      | 0      | 0      | 1      | 0      | 0      | 1      | 1      | 0      | 0      | 0      |
| Marinomonas          | 3              | 192            | 0      | 1      | 0      | 1      | 1      | 0      | 0      | 0      | 0      | 0      | 1      | 0      | 0      | 1      | 1      | 0      | 0      | 0      |
| Maritimibacter       | 1              | 7              | 0      | 0      | 0      | 0      | 0      | 0      | 0      | 0      | 0      | 0      | 0      | 0      | 0      | 0      | 0      | 0      | 0      | 0      |
| Marivirga            | 2              | 96             | 0      | 1      | 0      | 0      | 0      | 0      | 0      | 0      | 0      | 0      | 0      | 0      | 0      | 1      | 1      | 0      | 1      | 1      |
| Martella             | 1              | 3              | 0      | 0      | 0      | 0      | 0      | 0      | 0      | 0      | 0      | 0      | 0      | 0      | 0      | 0      | 0      | 0      | 0      | 0      |
| Marvinbryantia       | 1              | 1              | 0      | 0      | 0      | 0      | 0      | 0      | 0      | 0      | 0      | 0      | 0      | 0      | 0      | 0      | 0      | 0      | 0      | 0      |
| Massilia             | 1              | 4              | 0      | 0      | 0      | 0      | 0      | 0      | 0      | 0      | 0      | 0      | 0      | 0      | 0      | 0      | 0      | 0      | 0      | 0      |
| Mastigocladopsis     | 1              | 16             | 0      | 0      | 0      | 0      | 0      | 0      | 0      | 0      | 0      | 0      | 0      | 0      | 0      | 0      | 0      | 0      | 0      | 0      |
| Megamonas            | 1              | 47             | 0      | 0      | 0      | 0      | 0      | 0      | 0      | 0      | 0      | 0      | 0      | 0      | 0      | 0      | 0      | 0      | 0      | 0      |
| Megasphaera          | 1              | 14             | 0      | 0      | 0      | 0      | 0      | 0      | 0      | 0      | 0      | 0      | 0      | 0      | 0      | 1      | 0      | 0      | 0      | 0      |
| Meiothermus          | 2              | 110            | 1      | 0      | 0      | 0      | 1      | 0      | 0      | 0      | 0      | 0      | 0      | 0      | 0      | 1      | 1      | 0      | 1      | 0      |
| Melissococcus        | 2              | 46             | 0      | 0      | 0      | 0      | 0      | 0      | 0      | 0      | 0      | 0      | 0      | 0      | 0      | 0      | 0      | 0      | 0      | 0      |
| Mesoflavibacter      | 1              | 6              | 0      | 0      | 0      | 0      | 0      | 0      | 0      | 0      | 0      | 0      | 0      | 0      | 0      | 0      | 1      | 0      | 0      | 0      |
| Mesoplasma           | 1              | 23             | 0      | 0      | 0      | 0      | 0      | 0      | 0      | 0      | 0      | 0      | 0      | 0      | 0      | 0      | 0      | 0      | 0      | 1      |
| Mesorhizobium        | 2              | 201            | 1      | 1      | 0      | 1      | 1      | 1      | 1      | 1      | 0      | 0      | 0      | 1      | 0      | 1      | 1      | 1      | 0      | 1      |
| Mesotoga             | 1              | 14             | 0      | 0      | 0      | 0      | 0      | 0      | 0      | 0      | 0      | 0      | 0      | 0      | 0      | 1      | 0      | 0      | 1      | 0      |
| Metallosphaera       | 1              | 18             | 0      | 0      | 0      | 0      | 0      | 0      | 0      | 0      | 0      | 0      | 0      | 0      | 0      | 1      | 1      | 0      | 0      | 0      |
| Methanobacterium     | 1              | 7              | 0      | 0      | 0      | 0      | 0      | 0      | 0      | 0      | 1      | 0      | 0      | 0      | 0      | 1      | 0      | 0      | 0      | 0      |
| Methanobrevibacter   | 1              | 9              | 0      | 0      | 0      | 0      | 0      | 0      | 0      | 0      | 0      | 0      | 0      | 0      | 0      | 1      | 0      | 0      | 1      | 0      |
| Methanocaldococcus   | 1              | 6              | 0      | 0      | 0      | 0      | 0      | 0      | 0      | 0      | 0      | 0      | 0      | 0      | 0      | 1      | 0      | 0      | 0      | 1      |
| Methanocella         | 1              | 15             | 0      | 0      | 0      | 0      | 0      | 0      | 0      | 0      | 0      | 0      | 0      | 1      | 0      | 1      | 0      | 1      | 0      | 1      |
| Methanococcaceae     | 1              | 1              | 0      | 0      | 0      | 0      | 0      | 0      | 0      | 0      | 0      | 0      | 0      | 0      | 0      | 0      | 0      | 0      | 0      | 0      |
| Methanococcoides     | 1              | 5              | 0      | 0      | 0      | 0      | 0      | 0      | 0      | 0      | 0      | 0      | 0      | 0      | 0      | 1      | 0      | 0      | 0      | 1      |
| Methanococcus        | 1              | 9              | 0      | 0      | 0      | 0      | 0      | 0      | 0      | 0      | 0      | 0      | 0      | 1      | 0      | 1      | 0      | 0      | 0      | 1      |
| Methanocorpusculum   | 1              | 7              | 0      | 0      | 0      | 0      | 0      | 0      | 0      | 0      | 0      | 0      | 0      | 0      | 0      | 1      | 0      | 0      | 0      | 1      |
| Methanoculleus       | 1              | 8              | 0      | 0      | 0      | 0      | 0      | 0      | 0      | 0      | 0      | 0      | 0      | 0      | 0      | 1      | 0      | 0      | 0      | 1      |
| Methanohalobium      | 1              | 5              | 0      | 0      | 0      | 0      | 0      | 0      | 0      | 0      | 0      | 0      | 0      | 0      | 0      | 1      | 0      | 0      | 0      | 1      |
| Methanohalophilus    | 1              | 5              | 0      | 0      | 0      | 0      | 0      | 0      | 0      | 0      | 0      | 0      | 0      | 0      | 0      | 1      | 0      | 0      | 0      | 1      |
| Methanolobus         | 1              | 5              | 0      | 0      | 0      | 0      | 0      | 0      | 0      | 0      | 0      | 0      | 0      | 0      | 0      | 1      | 0      | 0      | 0      | 1      |
| Methanomethylovorans | 1              | 5              | 0      | 0      | 0      | 0      | 0      | 0      | 0      | 0      | 0      | 0      | 0      | 0      | 0      | 1      | 0      | 0      | 0      | 1      |
| Methanoplanus        | 1              | 7              | 0      | 0      | 0      | 0      | 0      | 0      | 0      | 0      | 0      | 0      | 0      | 0      | 0      | 1      | 0      | 0      | 0      | 1      |
| Methanopyrus         | 1              | 4              | 0      | 0      | 0      | 0      | 0      | 0      | 0      | 0      | 0      | 0      | 0      | 0      | 0      | 1      | 0      | 0      | 0      | 0      |
| Methanoregula        | 1              | 8              | 0      | 0      | 0      | 0      | 0      | 0      | 0      | 0      | 0      | 0      | 0      | 0      | 0      | 1      | 0      | 0      | 0      | 1      |
| Methanosaeta         | 1              | 9              | 0      | 0      | 0      | 0      | 0      | 0      | 0      | 0      | 0      | 0      | 0      | 0      | 0      | 1      | 0      | 0      | 0      | 1      |
| Methanosalsum        | 1              | 7              | 0      | 0      | 0      | 0      | 0      | 0      | 0      | 0      | 0      | 0      | 0      | 0      | 0      | 1      | 0      | 0      | 0      | 1      |

| Genus               | Cluster Number | Protein Counts | K00448 | K00451 | K00462 | K00480 | K00481 | K00485 | K00492 | K00493 | K00531 | K00539 | K00569 | K00599 | K00622 | K00626 | K00632 | K00680 | K00757 | K00758 |
|---------------------|----------------|----------------|--------|--------|--------|--------|--------|--------|--------|--------|--------|--------|--------|--------|--------|--------|--------|--------|--------|--------|
| Methanosarcina      | 1              | 18             | 0      | 0      | 0      | 0      | 0      | 0      | 0      | 0      | 1      | 0      | 0      | 1      | 0      | 1      | 0      | 1      | 0      | 1      |
| Methanosphaera      | 1              | 7              | 0      | 0      | 0      | 0      | 0      | 0      | 0      | 0      | 0      | 0      | 0      | 0      | 0      | 1      | 0      | 0      | 0      | 0      |
| Methanosphaerula    | 1              | 8              | 0      | 0      | 0      | 0      | 0      | 0      | 0      | 0      | 0      | 0      | 0      | 0      | 0      | 1      | 0      | 0      | 0      | 1      |
| Methanospirillum    | 1              | 6              | 0      | 0      | 0      | 0      | 0      | 0      | 0      | 0      | 0      | 0      | 0      | 0      | 0      | 1      | 0      | 0      | 0      | 1      |
| Methanothermobacter | 1              | 6              | 0      | 0      | 0      | 0      | 0      | 0      | 0      | 0      | 0      | 0      | 0      | 0      | 0      | 1      | 0      | 0      | 0      | 0      |
| Methanothermococcus | 1              | 5              | 0      | 0      | 0      | 0      | 0      | 0      | 0      | 0      | 0      | 0      | 0      | 0      | 0      | 1      | 0      | 0      | 0      | 1      |
| Methanothermus      | 1              | 5              | 0      | 0      | 0      | 0      | 0      | 0      | 0      | 0      | 0      | 0      | 0      | 0      | 0      | 1      | 0      | 0      | 0      | 0      |
| Methanotorris       | 1              | 5              | 0      | 0      | 0      | 0      | 0      | 0      | 0      | 0      | 0      | 0      | 0      | 0      | 0      | 1      | 0      | 0      | 0      | 1      |
| Methylacidiphilum   | 2              | 48             | 0      | 0      | 0      | 0      | 0      | 0      | 0      | 0      | 0      | 0      | 0      | 0      | 0      | 0      | 0      | 0      | 0      | 0      |
| Methylarcula        | 1              | 2              | 0      | 0      | 0      | 0      | 0      | 0      | 0      | 0      | 0      | 0      | 0      | 0      | 0      | 0      | 0      | 0      | 0      | 0      |
| Methylibium         | 1              | 38             | 0      | 1      | 0      | 0      | 0      | 0      | 0      | 0      | 0      | 1      | 0      | 1      | 0      | 1      | 1      | 0      | 0      | 0      |
| Methylobacillus     | 2              | 61             | 0      | 0      | 0      | 0      | 0      | 0      | 1      | 0      | 0      | 0      | 0      | 1      | 0      | 0      | 0      | 0      | 0      | 0      |
| Methylobacterium    | 3              | 236            | 1      | 1      | 0      | 1      | 1      | 0      | 1      | 0      | 0      | 0      | 0      | 1      | 0      | 1      | 0      | 1      | 0      | 1      |
| Methylocella        | 3              | 117            | 0      | 0      | 0      | 1      | 0      | 1      | 0      | 0      | 0      | 0      | 0      | 0      | 0      | 1      | 1      | 0      | 0      | 0      |
| Methylococcus       | 2              | 80             | 0      | 0      | 0      | 0      | 0      | 0      | 0      | 0      | 0      | 0      | 1      | 0      | 0      | 0      | 0      | 0      | 0      | 1      |
| Methylocystis       | 1              | 21             | 0      | 1      | 0      | 1      | 0      | 0      | 0      | 0      | 0      | 0      | 0      | 0      | 0      | 1      | 0      | 0      | 0      | 0      |
| Methyloferula       | 1              | 2              | 0      | 0      | 0      | 0      | 0      | 0      | 0      | 0      | 0      | 0      | 0      | 0      | 0      | 0      | 0      | 0      | 0      | 0      |
| Methylomicrobium    | 1              | 12             | 0      | 0      | 0      | 0      | 0      | 0      | 0      | 0      | 0      | 0      | 1      | 0      | 0      | 0      | 1      | 0      | 0      | 1      |
| Methylomonas        | 1              | 15             | 0      | 0      | 0      | 0      | 0      | 0      | 0      | 0      | 0      | 0      | 1      | 0      | 0      | 0      | 0      | 0      | 0      | 0      |
| Methylophaga        | 1              | 7              | 0      | 0      | 0      | 0      | 0      | 0      | 0      | 0      | 0      | 0      | 0      | 0      | 0      | 0      | 0      | 0      | 0      | 0      |
| Methylophilus       | 1              | 2              | 0      | 0      | 0      | 0      | 0      | 0      | 0      | 0      | 0      | 0      | 0      | 0      | 0      | 0      | 0      | 0      | 0      | 0      |
| Methylosinus        | 1              | 2              | 0      | 0      | 0      | 0      | 0      | 0      | 0      | 0      | 0      | 0      | 0      | 0      | 0      | 0      | 0      | 0      | 0      | 0      |
| Methylotenera       | 2              | 72             | 0      | 0      | 0      | 0      | 0      | 0      | 0      | 0      | 0      | 0      | 1      | 0      | 0      | 0      | 0      | 0      | 0      | 0      |
| Methyloversatilis   | 1              | 5              | 0      | 0      | 0      | 0      | 0      | 0      | 0      | 0      | 0      | 0      | 0      | 0      | 0      | 0      | 0      | 0      | 0      | 0      |
| Methylovorus        | 2              | 66             | 0      | 0      | 0      | 0      | 0      | 0      | 0      | 0      | 0      | 0      | 1      | 0      | 0      | 0      | 0      | 0      | 0      | 0      |
| Micavibrio          | 1              | 9              | 0      | 1      | 0      | 0      | 0      | 0      | 0      | 0      | 0      | 0      | 0      | 0      | 0      | 1      | 0      | 0      | 0      | 1      |
| Microbacterium      | 2              | 115            | 1      | 0      | 0      | 0      | 1      | 0      | 0      | 0      | 0      | 0      | 0      | 1      | 0      | 1      | 1      | 0      | 0      | 1      |
| Microchaete         | 1              | 23             | 0      | 0      | 0      | 0      | 0      | 0      | 0      | 0      | 0      | 0      | 0      | 0      | 0      | 0      | 0      | 0      | 0      | 0      |
| Micrococcus         | 2              | 72             | 0      | 0      | 0      | 0      | 0      | 0      | 0      | 0      | 0      | 0      | 0      | 1      | 0      | 1      | 0      | 0      | 0      | 1      |
| Microcoleus         | 1              | 17             | 0      | 0      | 0      | 0      | 0      | 0      | 0      | 0      | 0      | 0      | 0      | 0      | 0      | 0      | 0      | 0      | 1      | 0      |
| Microcystis         | 2              | 67             | 0      | 0      | 0      | 0      | 0      | 0      | 0      | 0      | 0      | 0      | 0      | 0      | 0      | 1      | 0      | 0      | 1      | 0      |
| Microlunatus        | 1              | 25             | 0      | 1      | 0      | 0      | 1      | 0      | 0      | 0      | 0      | 0      | 0      | 1      | 0      | 1      | 1      | 0      | 0      | 0      |
| Micromonospora      | 2              | 115            | 0      | 1      | 0      | 0      | 0      | 0      | 0      | 0      | 0      | 0      | 0      | 1      | 0      | 1      | 1      | 0      | 0      | 1      |
| Microvirga          | 1              | 6              | 0      | 1      | 0      | 0      | 0      | 0      | 0      | 0      | 0      | 0      | 0      | 0      | 0      | 0      | 0      | 0      | 0      | 0      |
| Mobiluncus          | 1              | 41             | 0      | 0      | 0      | 0      | 0      | 0      | 0      | 0      | 0      | 0      | 0      | 1      | 0      | 0      | 0      | 0      | 0      | 0      |
| Modestobacter       | 1              | 43             | 1      | 1      | 0      | 1      | 1      | 0      | 0      | 0      | 0      | 0      | 0      | 0      | 0      | 1      | 0      | 0      | 0      | 1      |
| Moorea              | 1              | 2              | 0      | 0      | 0      | 0      | 0      | 0      | 0      | 0      | 0      | 0      | 0      | 0      | 0      | 0      | 0      | 0      | 0      | 0      |
| Moorella            | 2              | 69             | 0      | 0      | 0      | 0      | 0      | 0      | 0      | 0      | 0      | 0      | 0      | 0      | 0      | 1      | 0      | 0      | 0      | 1      |
| Moraxella           | 2              | 66             | 0      | 0      | 0      | 0      | 0      | 0      | 0      | 0      | 0      | 0      | 0      | 0      | 0      | 1      | 1      | 0      | 0      | 0      |
| Morganella          | 1              | 29             | 0      | 0      | 0      | 0      | 0      | 0      | 0      | 0      | 0      | 0      | 0      | 0      | 0      | 1      | 0      | 1      | 1      | 1      |
| Moritella           | 1              | 2              | 0      | 0      | 0      | 0      | 0      | 0      | 0      | 0      | 0      | 0      | 0      | 0      | 0      | 0      | 0      | 0      | 0      | 0      |
| Muricauda           | 1              | 23             | 0      | 1      | 0      | 0      | 0      | 0      | 0      | 0      | 0      | 0      | 0      | 0      | 0      | 1      | 1      | 0      | 1      | 0      |
| Mycobacterium       | 3              | 306            | 1      | 1      | 1      | 1      | 0      | 1      | 1      | 1      | 0      | 0      | 0      | 1      | 1      | 1      | 1      | 1      | 0      | 1      |
| Mycoplasma          | 1              | 53             | 0      | 0      | 0      | 0      | 0      | 0      | 0      | 0      | 0      | 0      | 0      | 1      | 0      | 0      | 0      | 1      | 0      | 1      |
| Myxococcus          | 2              | 110            | 0      | 1      | 0      | 0      | 0      | 1      | 0      | 0      | 0      | 0      | 0      | 1      | 0      | 1      | 1      | 0      | 0      | 0      |
| Nakamurella         | 2              | 115            | 0      | 1      | 0      | 0      | 1      | 0      | 0      | 0      | 0      | 0      | 0      | 1      | 0      | 1      | 1      | 0      | 0      | 1      |
| napthalene          | 1              | 2              | 0      | 0      | 0      | 0      | 0      | 0      | 0      | 0      | 0      | 0      | 0      | 0      | 0      | 0      | 0      | 0      | 0      | 0      |
| Natranaerobius      | 2              | 55             | 0      | 0      | 0      | 0      | 0      | 0      | 0      | 0      | 0      | 0      | 0      | 0      | 0      | 1      | 0      | 0      | 0      | 0      |
| Natrialba           | 1              | 16             | 0      | 0      | 0      | 0      | 0      | 0      | 0      | 0      | 0      | 0      | 0      | 0      | 0      | 1      | 1      | 0      | 1      | 1      |
| Natrinema           | 1              | 16             | 0      | 0      | 0      | 0      | 0      | 0      | 0      | 0      | 0      | 0      | 0      | 0      | 0      | 1      | 0      | 0      | 1      | 0      |
| Natronobacterium    | 1              | 11             | 0      | 0      | 0      | 0      | 0      | 0      | 0      | 0      | 0      | 0      | 0      | 0      | 0      | 1      | 0      | 0      | 1      | 0      |
| Natronococcus       | 1              | 21             | 0      | 0      | 0      | 0      | 0      | 0      | 0      | 0      | 0      | 0      | 0      | 0      | 0      | 1      | 0      | 0      | 1      | 0      |

| Genus             | Cluster Number | Protein Counts | K00448 | K00451 | K00462 | K00480 | K00481 | K00485 | K00492 | K00493 | K00531 | K00539 | K00569 | K00599 | K00622 | K00626 | K00632 | K00680 | K00757 | K00758 |
|-------------------|----------------|----------------|--------|--------|--------|--------|--------|--------|--------|--------|--------|--------|--------|--------|--------|--------|--------|--------|--------|--------|
| Natronomonas      | 1              | 20             | 0      | 0      | 0      | 0      | 0      | 0      | 0      | 0      | 0      | 0      | 0      | 1      | 0      | 1      | 1      | 0      | 1      | 1      |
| Nautilia          | 2              | 48             | 0      | 0      | 0      | 0      | 0      | 0      | 0      | 0      | 0      | 0      | 0      | 0      | 0      | 0      | 0      | 0      | 0      | 0      |
| Neisseria         | 2              | 67             | 0      | 0      | 0      | 0      | 0      | 0      | 0      | 0      | 0      | 0      | 0      | 1      | 0      | 0      | 0      | 0      | 0      | 0      |
| Neisseriaceae     | 1              | 1              | 0      | 0      | 0      | 0      | 0      | 0      | 0      | 0      | 0      | 0      | 0      | 0      | 0      | 0      | 0      | 0      | 0      | 0      |
| Neorickettsia     | 1              | 31             | 0      | 0      | 0      | 0      | 0      | 0      | 0      | 0      | 0      | 0      | 0      | 1      | 0      | 0      | 0      | 0      | 0      | 0      |
| Neptuniibacter    | 1              | 2              | 0      | 0      | 0      | 0      | 0      | 0      | 0      | 0      | 0      | 0      | 0      | 0      | 0      | 0      | 0      | 0      | 0      | 0      |
| Niastella         | 1              | 21             | 0      | 1      | 0      | 0      | 0      | 0      | 0      | 0      | 0      | 0      | 0      | 0      | 0      | 1      | 0      | 0      | 1      | 0      |
| Nitratifractor    | 2              | 54             | 0      | 0      | 0      | 0      | 0      | 0      | 0      | 0      | 0      | 0      | 0      | 1      | 0      | 0      | 0      | 0      | 0      | 0      |
| Nitratireductor   | 1              | 19             | 0      | 0      | 0      | 0      | 0      | 0      | 0      | 0      | 0      | 0      | 0      | 0      | 0      | 1      | 0      | 0      | 0      | 0      |
| Nitratiruptor     | 2              | 40             | 0      | 0      | 0      | 0      | 0      | 0      | 0      | 0      | 0      | 0      | 0      | 0      | 0      | 0      | 0      | 0      | 0      | 0      |
| Nitrobacter       | 2              | 99             | 0      | 1      | 0      | 1      | 0      | 0      | 0      | 0      | 0      | 0      | 0      | 0      | 0      | 1      | 1      | 0      | 0      | 1      |
| Nitrococcus       | 1              | 2              | 0      | 0      | 0      | 0      | 0      | 0      | 0      | 0      | 0      | 0      | 0      | 0      | 0      | 0      | 0      | 0      | 0      | 0      |
| Nitrosococcus     | 2              | 94             | 0      | 1      | 0      | 0      | 0      | 0      | 0      | 0      | 0      | 0      | 0      | 0      | 0      | 1      | 1      | 0      | 0      | 0      |
| Nitrosomonas      | 2              | 72             | 0      | 0      | 0      | 0      | 0      | 0      | 0      | 0      | 0      | 0      | 1      | 1      | 0      | 1      | 1      | 0      | 0      | 0      |
| Nitrosopumilaceae | 1              | 7              | 0      | 0      | 0      | 0      | 0      | 0      | 0      | 0      | 0      | 0      | 0      | 0      | 0      | 1      | 0      | 0      | 0      | 0      |
| Nitrosopumilus    | 1              | 11             | 0      | 0      | 0      | 0      | 0      | 0      | 0      | 0      | 0      | 0      | 0      | 0      | 0      | 1      | 0      | 0      | 0      | 0      |
| Nitrospira        | 2              | 74             | 0      | 0      | 0      | 0      | 0      | 0      | 0      | 0      | 0      | 0      | 1      | 0      | 0      | 0      | 1      | 0      | 0      | 0      |
| Nocardia          | 2              | 185            | 1      | 1      | 0      | 0      | 1      | 0      | 1      | 1      | 0      | 0      | 0      | 1      | 0      | 1      | 1      | 1      | 0      | 1      |
| Nocardioidaceae   | 1              | 2              | 0      | 0      | 0      | 0      | 0      | 0      | 0      | 0      | 0      | 0      | 0      | 0      | 0      | 0      | 0      | 0      | 0      | 0      |
| Nocardioides      | 2              | 157            | 0      | 1      | 0      | 0      | 0      | 0      | 0      | 1      | 0      | 0      | 0      | 1      | 0      | 1      | 1      | 0      | 0      | 1      |
| Nocardiopsis      | 2              | 102            | 0      | 1      | 0      | 0      | 0      | 0      | 0      | 0      | 0      | 0      | 0      | 1      | 0      | 1      | 1      | 0      | 0      | 1      |
| Nodularia         | 1              | 22             | 0      | 0      | 0      | 0      | 0      | 0      | 0      | 0      | 0      | 0      | 0      | 0      | 0      | 0      | 0      | 0      | 0      | 0      |
| Nonlabens         | 1              | 19             | 0      | 1      | 0      | 0      | 0      | 0      | 0      | 0      | 0      | 0      | 0      | 0      | 0      | 1      | 0      | 0      | 1      | 0      |
| Nostoc            | 2              | 111            | 0      | 0      | 0      | 1      | 0      | 0      | 0      | 0      | 0      | 0      | 0      | 1      | 0      | 0      | 0      | 0      | 1      | 0      |
| Nostocaceae       | 1              | 2              | 0      | 0      | 0      | 0      | 0      | 0      | 0      | 0      | 0      | 0      | 0      | 0      | 0      | 0      | 0      | 0      | 0      | 0      |
| Novosphingobium   | 2              | 169            | 0      | 0      | 0      | 0      | 1      | 1      | 0      | 0      | 0      | 0      | 0      | 0      | 0      | 1      | 1      | 0      | 0      | 1      |
| Oceanibaculum     | 1              | 3              | 0      | 0      | 0      | 0      | 0      | 0      | 0      | 0      | 0      | 0      | 0      | 0      | 0      | 0      | 0      | 0      | 0      | 0      |
| Oceanibulbus      | 1              | 12             | 0      | 0      | 0      | 0      | 0      | 0      | 0      | 0      | 0      | 0      | 0      | 0      | 0      | 1      | 0      | 0      | 0      | 0      |
| Oceanicola        | 1              | 9              | 0      | 0      | 0      | 0      | 0      | 0      | 0      | 0      | 0      | 0      | 0      | 0      | 0      | 0      | 0      | 0      | 0      | 0      |
| Oceanimonas       | 1              | 33             | 1      | 1      | 0      | 1      | 1      | 1      | 1      | 0      | 0      | 0      | 1      | 0      | 0      | 1      | 1      | 0      | 1      | 1      |
| Oceaniovalibus    | 1              | 2              | 0      | 0      | 0      | 0      | 0      | 0      | 0      | 0      | 0      | 0      | 0      | 0      | 0      | 0      | 0      | 0      | 0      | 0      |
| Oceanithermus     | 2              | 72             | 0      | 0      | 0      | 0      | 0      | 0      | 0      | 0      | 0      | 0      | 0      | 0      | 0      | 1      | 1      | 0      | 0      | 0      |
| Oceanobacillus    | 2              | 91             | 0      | 0      | 0      | 0      | 0      | 0      | 0      | 0      | 0      | 0      | 0      | 1      | 0      | 1      | 1      | 0      | 0      | 0      |
| Oceanospirillum   | 1              | 2              | 0      | 0      | 0      | 0      | 0      | 0      | 0      | 0      | 0      | 0      | 0      | 0      | 0      | 0      | 0      | 0      | 0      | 0      |
| Ochrobactrum      | 2              | 133            | 1      | 0      | 0      | 1      | 1      | 0      | 0      | 0      | 0      | 0      | 0      | 0      | 0      | 1      | 0      | 0      | 0      | 0      |
| Octadecabacter    | 1              | 29             | 0      | 0      | 0      | 1      | 0      | 0      | 0      | 0      | 0      | 0      | 0      | 0      | 0      | 1      | 0      | 0      | 0      | 1      |
| Oenococcus        | 2              | 41             | 0      | 0      | 0      | 0      | 0      | 0      | 0      | 0      | 0      | 0      | 0      | 0      | 0      | 1      | 0      | 0      | 0      | 0      |
| Oleomonas         | 1              | 2              | 0      | 0      | 0      | 0      | 0      | 0      | 0      | 0      | 0      | 0      | 0      | 0      | 0      | 0      | 0      | 0      | 0      | 0      |
| Oligotropha       | 3              | 87             | 0      | 0      | 0      | 1      | 0      | 0      | 0      | 0      | 0      | 0      | 0      | 0      | 0      | 1      | 0      | 0      | 0      | 0      |
| Olsenella         | 2              | 40             | 0      | 0      | 0      | 0      | 0      | 0      | 0      | 0      | 0      | 0      | 0      | 1      | 0      | 1      | 0      | 0      | 1      | 0      |
| Opitutus          | 2              | 67             | 0      | 0      | 0      | 0      | 0      | 0      | 0      | 0      | 0      | 0      | 0      | 0      | 0      | 0      | 0      | 0      | 0      | 0      |
| Orientia          | 1              | 21             | 0      | 0      | 0      | 0      | 0      | 0      | 0      | 0      | 0      | 0      | 0      | 0      | 0      | 0      | 0      | 0      | 0      | 0      |
| Ornithobacterium  | 1              | 11             | 0      | 0      | 0      | 0      | 0      | 0      | 0      | 0      | 0      | 0      | 0      | 0      | 0      | 0      | 0      | 0      | 1      | 0      |
| Oscillatoria      | 1              | 16             | 0      | 0      | 0      | 0      | 0      | 0      | 0      | 0      | 0      | 0      | 0      | 0      | 0      | 0      | 0      | 0      | 0      | 0      |
| Oscillatoriales   | 1              | 2              | 0      | 0      | 0      | 0      | 0      | 0      | 0      | 0      | 0      | 0      | 0      | 0      | 0      | 0      | 0      | 0      | 0      | 0      |
| Oscillibacter     | 1              | 20             | 0      | 0      | 0      | 0      | 0      | 0      | 0      | 0      | 0      | 0      | 0      | 0      | 0      | 1      | 0      | 0      | 1      | 0      |
| Owenweeksia       | 1              | 15             | 0      | 1      | 0      | 0      | 0      | 0      | 0      | 0      | 0      | 0      | 0      | 0      | 0      | 1      | 0      | 0      | 1      | 0      |
| Oxalobacteraceae  | 1              | 4              | 0      | 0      | 0      | 0      | 0      | 0      | 0      | 0      | 0      | 0      | 0      | 0      | 0      | 0      | 0      | 0      | 0      | 0      |
| Paenibacillus     | 2              | 152            | 0      | 0      | 0      | 0      | 0      | 0      | 0      | 0      | 0      | 0      | 0      | 1      | 0      | 1      | 1      | 1      | 1      | 0      |
| Paludibacter      | 2              | 67             | 0      | 0      | 0      | 0      | 0      | 0      | 0      | 0      | 1      | 0      | 0      | 0      | 0      | 0      | 0      | 0      | 1      | 0      |
| Pandoraea         | 1              | 18             | 0      | 0      | 0      | 0      | 0      | 0      | 0      | 0      | 0      | 0      | 0      | 0      | 0      | 0      | 0      | 0      | 0      | 0      |
| Pannonibacter     | 1              | 3              | 0      | 0      | 0      | 0      | 0      | 0      | 0      | 0      | 0      | 0      | 0      | 0      | 0      | 0      | 0      | 0      | 0      | 0      |

| Genus              | Cluster Number | Protein Counts | K00448 | K00451 | K00462 | K00480 | K00481 | K00485 | K00492 | K00493 | K00531 | K00539 | K00569 | K00599 | K00622 | K00626 | K00632 | K00680 | K00757 | K00758 |
|--------------------|----------------|----------------|--------|--------|--------|--------|--------|--------|--------|--------|--------|--------|--------|--------|--------|--------|--------|--------|--------|--------|
| Pantholops         | 1              | 23             | 0      | 0      | 0      | 0      | 0      | 0      | 0      | 0      | 0      | 0      | 0      | 0      | 0      | 1      | 1      | 0      | 0      | 0      |
| Pantoea            | 2              | 181            | 1      | 0      | 0      | 0      | 0      | 0      | 0      | 0      | 0      | 0      | 0      | 0      | 0      | 0      | 1      | 0      | 1      | 1      |
| Parabacteroides    | 2              | 64             | 0      | 0      | 0      | 0      | 0      | 0      | 0      | 0      | 0      | 0      | 0      | 0      | 0      | 0      | 0      | 0      | 1      | 0      |
| Parachlamydia      | 1              | 11             | 0      | 0      | 0      | 0      | 0      | 0      | 0      | 0      | 0      | 0      | 0      | 1      | 0      | 1      | 1      | 0      | 0      | 0      |
| Paracoccus         | 2              | 169            | 1      | 1      | 0      | 1      | 1      | 0      | 0      | 0      | 0      | 0      | 0      | 0      | 0      | 1      | 1      | 0      | 0      | 1      |
| Parvibaculum       | 3              | 117            | 0      | 0      | 0      | 0      | 0      | 0      | 0      | 0      | 0      | 0      | 0      | 0      | 0      | 1      | 1      | 0      | 0      | 1      |
| Parvularcula       | 2              | 72             | 0      | 0      | 0      | 0      | 0      | 0      | 0      | 0      | 0      | 0      | 0      | 0      | 0      | 1      | 0      | 0      | 0      | 0      |
| Pasteurella        | 2              | 85             | 0      | 0      | 0      | 0      | 0      | 0      | 0      | 0      | 0      | 0      | 0      | 0      | 0      | 0      | 0      | 1      | 1      | 0      |
| Pasteurellaceae    | 1              | 2              | 0      | 0      | 0      | 0      | 0      | 0      | 0      | 0      | 0      | 0      | 0      | 0      | 0      | 0      | 0      | 0      | 0      | 0      |
| Pectobacterium     | 1              | 44             | 0      | 0      | 0      | 0      | 0      | 0      | 0      | 0      | 0      | 0      | 0      | 0      | 0      | 1      | 1      | 1      | 1      | 1      |
| Pediococcus        | 1              | 43             | 0      | 0      | 0      | 0      | 0      | 0      | 0      | 0      | 0      | 0      | 0      | 1      | 0      | 1      | 0      | 1      | 0      | 0      |
| Pedobacter         | 2              | 88             | 0      | 1      | 0      | 0      | 0      | 1      | 0      | 0      | 0      | 0      | 0      | 0      | 0      | 1      | 1      | 1      | 1      | 0      |
| Pelagibaca         | 1              | 10             | 0      | 0      | 0      | 0      | 0      | 0      | 0      | 0      | 0      | 0      | 0      | 0      | 0      | 1      | 0      | 0      | 0      | 0      |
| Pelagibacterium    | 1              | 39             | 1      | 0      | 0      | 1      | 1      | 0      | 0      | 0      | 0      | 0      | 0      | 0      | 0      | 1      | 0      | 0      | 1      | 1      |
| Pelobacter         | 2              | 85             | 0      | 0      | 0      | 0      | 0      | 0      | 0      | 0      | 0      | 0      | 0      | 0      | 0      | 0      | 0      | 1      | 1      | 0      |
| Pelodictyon        | 2              | 62             | 0      | 0      | 0      | 0      | 0      | 0      | 0      | 0      | 0      | 0      | 0      | 0      | 0      | 0      | 0      | 0      | 0      | 0      |
| Pelosinus          | 1              | 1              | 0      | 0      | 0      | 0      | 0      | 0      | 0      | 0      | 0      | 0      | 0      | 0      | 0      | 0      | 0      | 0      | 0      | 0      |
| Pelotomaculum      | 2              | 60             | 0      | 0      | 0      | 0      | 0      | 0      | 0      | 0      | 0      | 0      | 0      | 0      | 0      | 1      | 0      | 0      | 0      | 1      |
| Peptostreptococcus | 1              | 1              | 0      | 0      | 0      | 0      | 0      | 0      | 0      | 0      | 0      | 0      | 0      | 0      | 0      | 0      | 0      | 0      | 0      | 0      |
| Persephonella      | 2              | 55             | 0      | 0      | 0      | 0      | 0      | 0      | 0      | 0      | 0      | 0      | 0      | 0      | 0      | 0      | 0      | 0      | 0      | 0      |
| Petrotoga          | 2              | 72             | 0      | 0      | 0      | 0      | 0      | 0      | 0      | 0      | 0      | 0      | 0      | 0      | 0      | 1      | 0      | 0      | 1      | 0      |
| Phaeobacter        | 2              | 55             | 1      | 1      | 0      | 1      | 1      | 0      | 0      | 0      | 0      | 0      | 0      | 0      | 0      | 1      | 0      | 0      | 0      | 1      |
| Phenylobacterium   | 3              | 103            | 0      | 1      | 0      | 0      | 0      | 0      | 0      | 0      | 0      | 0      | 0      | 0      | 0      | 1      | 0      | 0      | 0      | 1      |
| Photobacterium     | 2              | 119            | 0      | 1      | 0      | 0      | 0      | 0      | 0      | 0      | 0      | 0      | 1      | 0      | 0      | 1      | 1      | 0      | 1      | 0      |
| Photorhabdus       | 2              | 149            | 0      | 0      | 0      | 0      | 0      | 0      | 0      | 0      | 0      | 0      | 0      | 0      | 0      | 1      | 1      | 1      | 1      | 1      |
| Phycisphaera       | 1              | 9              | 0      | 0      | 0      | 0      | 0      | 0      | 0      | 0      | 0      | 0      | 0      | 0      | 0      | 0      | 0      | 0      | 0      | 0      |
| Phyllobacterium    | 1              | 6              | 0      | 0      | 0      | 0      | 0      | 0      | 0      | 0      | 0      | 0      | 0      | 0      | 0      | 1      | 0      | 0      | 0      | 0      |
| Picrophilus        | 1              | 15             | 0      | 1      | 0      | 0      | 0      | 0      | 0      | 1      | 0      | 0      | 0      | 1      | 0      | 1      | 0      | 1      | 0      | 0      |
| Pirellula          | 2              | 85             | 0      | 0      | 0      | 0      | 0      | 0      | 0      | 0      | 0      | 0      | 0      | 1      | 0      | 1      | 1      | 0      | 0      | 0      |
| Planctomyces       | 2              | 93             | 0      | 0      | 0      | 0      | 0      | 0      | 0      | 0      | 0      | 0      | 0      | 1      | 0      | 1      | 0      | 0      | 0      | 0      |
| Plautia            | 1              | 17             | 0      | 0      | 0      | 0      | 0      | 0      | 0      | 0      | 0      | 0      | 0      | 0      | 0      | 0      | 0      | 0      | 0      | 0      |
| Plesiomonas        | 1              | 4              | 0      | 0      | 0      | 0      | 0      | 0      | 0      | 0      | 0      | 0      | 0      | 0      | 0      | 0      | 0      | 0      | 0      | 0      |
| Pleurocapsa        | 1              | 23             | 0      | 1      | 0      | 0      | 0      | 0      | 0      | 0      | 0      | 0      | 0      | 0      | 0      | 1      | 0      | 0      | 1      | 0      |
| Polaribacter       | 2              | 74             | 0      | 1      | 0      | 0      | 0      | 0      | 0      | 0      | 0      | 0      | 0      | 0      | 0      | 1      | 0      | 0      | 1      | 0      |
| Polaromonas        | 3              | 238            | 1      | 1      | 1      | 1      | 1      | 0      | 0      | 0      | 0      | 0      | 0      | 0      | 0      | 1      | 1      | 0      | 0      | 1      |
| Polymorphum        | 3              | 173            | 1      | 1      | 0      | 1      | 1      | 0      | 0      | 0      | 0      | 0      | 0      | 0      | 0      | 1      | 1      | 1      | 0      | 1      |
| Polynucleobacter   | 1              | 19             | 0      | 0      | 0      | 0      | 0      | 0      | 0      | 0      | 0      | 0      | 0      | 0      | 0      | 1      | 1      | 0      | 0      | 0      |
| Ponticaulis        | 1              | 1              | 0      | 0      | 0      | 0      | 0      | 0      | 0      | 0      | 0      | 0      | 0      | 0      | 0      | 0      | 0      | 0      | 0      | 0      |
| Porphyromonas      | 2              | 63             | 0      | 0      | 0      | 0      | 0      | 0      | 0      | 0      | 0      | 0      | 0      | 1      | 0      | 0      | 0      | 0      | 1      | 0      |
| Prevotella         | 1              | 65             | 0      | 0      | 0      | 0      | 0      | 0      | 0      | 0      | 0      | 0      | 0      | 1      | 0      | 0      | 0      | 0      | 1      | 0      |
| Prochlorococcus    | 2              | 68             | 0      | 0      | 0      | 0      | 0      | 0      | 0      | 0      | 0      | 0      | 0      | 1      | 0      | 0      | 0      | 0      | 0      | 0      |
| Propionibacterium  | 1              | 62             | 0      | 0      | 0      | 0      | 0      | 0      | 0      | 0      | 0      | 0      | 0      | 1      | 0      | 1      | 0      | 1      | 0      | 1      |
| Prosthecochloris   | 1              | 16             | 0      | 0      | 0      | 0      | 0      | 0      | 0      | 0      | 0      | 0      | 0      | 0      | 0      | 0      | 0      | 0      | 0      | 0      |
| Proteobacteria     | 1              | 19             | 0      | 0      | 0      | 0      | 0      | 0      | 0      | 0      | 0      | 0      | 0      | 0      | 0      | 0      | 0      | 0      | 0      | 1      |
| Proteus            | 2              | 113            | 0      | 0      | 0      | 0      | 0      | 0      | 0      | 0      | 0      | 0      | 0      | 0      | 0      | 0      | 1      | 0      | 1      | 1      |
| Providencia        | 1              | 38             | 0      | 0      | 0      | 0      | 0      | 0      | 0      | 0      | 0      | 0      | 0      | 0      | 0      | 0      | 1      | 0      | 1      | 1      |
| Pseudaminobacter   | 1              | 10             | 0      | 0      | 0      | 0      | 0      | 0      | 0      | 0      | 0      | 0      | 0      | 0      | 0      | 1      | 0      | 0      | 0      | 0      |
| Pseudanabaena      | 1              | 11             | 0      | 0      | 0      | 0      | 0      | 0      | 0      | 0      | 0      | 0      | 0      | 0      | 0      | 0      | 0      | 0      | 0      | 0      |
| Pseudoalteromonas  | 2              | 188            | 0      | 1      | 0      | 1      | 1      | 1      | 0      | 0      | 0      | 0      | 1      | 0      | 0      | 1      | 1      | 0      | 1      | 0      |
| Pseudochrobactrum  | 1              | 7              | 0      | 0      | 0      | 0      | 0      | 0      | 0      | 0      | 0      | 0      | 0      | 0      | 0      | 1      | 0      | 0      | 0      | 0      |
| Pseudogulbenkiania | 1              | 40             | 1      | 1      | 0      | 1      | 0      | 0      | 0      | 0      | 0      | 0      | 0      | 0      | 0      | 1      | 1      | 0      | 0      | 1      |
| pseudomallei       | 3              | 131            | 1      | 1      | 0      | 0      | 0      | 0      | 0      | 1      | 0      | 0      | 0      | 1      | 0      | 1      | 1      | 1      | 0      | 1      |

| Genus                   | Cluster Number | Protein Counts | K00448 | K00451 | K00462 | K00480 | K00481 | K00485 | K00492 | K00493 | K00531 | K00539 | K00569 | K00599 | K00622 | K00626 | K00632 | K00680 | K00757 | K00758 |
|-------------------------|----------------|----------------|--------|--------|--------|--------|--------|--------|--------|--------|--------|--------|--------|--------|--------|--------|--------|--------|--------|--------|
| Pseudomonas             | 3              | 381            | 1      | 1      | 1      | 1      | 1      | 1      | 1      | 1      | 0      | 0      | 1      | 1      | 0      | 1      | 1      | 1      | 0      | 1      |
| Pseudonocardia          | 3              | 180            | 1      | 1      | 0      | 1      | 1      | 0      | 0      | 0      | 0      | 0      | 0      | 1      | 0      | 1      | 1      | 0      | 0      | 0      |
| Pseudorhodobacter       | 1              | 4              | 0      | 0      | 0      | 0      | 0      | 0      | 0      | 0      | 0      | 0      | 0      | 0      | 0      | 0      | 0      | 0      | 0      | 0      |
| Pseudovibrio            | 1              | 33             | 1      | 1      | 0      | 1      | 1      | 0      | 0      | 0      | 0      | 0      | 0      | 0      | 0      | 1      | 0      | 0      | 0      | 1      |
| Pseudoxanthomonas       | 2              | 124            | 0      | 1      | 1      | 1      | 0      | 0      | 0      | 0      | 0      | 0      | 1      | 0      | 0      | 1      | 1      | 0      | 0      | 1      |
| Psychrobacter           | 2              | 124            | 0      | 0      | 0      | 0      | 0      | 0      | 1      | 0      | 0      | 0      | 1      | 0      | 0      | 1      | 1      | 0      | 0      | 0      |
| Psychroflexus           | 1              | 22             | 0      | 1      | 0      | 0      | 0      | 0      | 0      | 0      | 0      | 0      | 0      | 0      | 0      | 1      | 0      | 0      | 1      | 0      |
| Psychromonas            | 2              | 110            | 0      | 0      | 0      | 0      | 0      | 0      | 0      | 0      | 0      | 0      | 1      | 0      | 0      | 1      | 1      | 0      | 1      | 1      |
| Pusillimonas            | 3              | 111            | 0      | 1      | 0      | 0      | 0      | 0      | 1      | 0      | 0      | 0      | 1      | 0      | 0      | 1      | 1      | 0      | 0      | 0      |
| Pyrobaculum             | 1              | 15             | 0      | 0      | 0      | 0      | 0      | 0      | 0      | 0      | 0      | 0      | 0      | 0      | 0      | 1      | 1      | 0      | 1      | 0      |
| Pyrococcus              | 1              | 10             | 0      | 0      | 0      | 0      | 0      | 0      | 0      | 0      | 0      | 0      | 0      | 0      | 0      | 1      | 0      | 0      | 0      | 1      |
| Pyrolobus               | 1              | 4              | 0      | 0      | 0      | 0      | 0      | 0      | 0      | 0      | 0      | 0      | 0      | 0      | 0      | 1      | 0      | 0      | 0      | 0      |
| Rahnella                | 2              | 143            | 0      | 0      | 0      | 0      | 0      | 0      | 0      | 0      | 0      | 0      | 0      | 1      | 0      | 0      | 1      | 1      | 1      | 1      |
| Ralstonia               | 3              | 332            | 1      | 1      | 0      | 1      | 1      | 0      | 1      | 1      | 0      | 1      | 1      | 1      | 0      | 1      | 1      | 1      | 0      | 1      |
| Ramlibacter             | 1              | 35             | 0      | 0      | 0      | 1      | 1      | 0      | 0      | 0      | 0      | 0      | 0      | 0      | 0      | 1      | 1      | 0      | 0      | 0      |
| Raoultella              | 2              | 139            | 1      | 0      | 0      | 0      | 1      | 0      | 0      | 0      | 0      | 0      | 0      | 0      | 0      | 1      | 1      | 0      | 1      | 1      |
| Raphidiopsis            | 1              | 5              | 0      | 0      | 0      | 0      | 0      | 0      | 0      | 0      | 0      | 0      | 0      | 0      | 0      | 0      | 0      | 0      | 0      | 0      |
| Reinekea                | 1              | 2              | 0      | 0      | 0      | 0      | 0      | 0      | 0      | 0      | 0      | 0      | 0      | 0      | 0      | 0      | 0      | 0      | 0      | 0      |
| Renibacterium           | 2              | 67             | 0      | 0      | 0      | 0      | 0      | 0      | 0      | 0      | 0      | 0      | 0      | 1      | 0      | 1      | 1      | 0      | 0      | 1      |
| Rhizobiaceae            | 1              | 3              | 0      | 0      | 0      | 0      | 0      | 0      | 0      | 0      | 0      | 0      | 0      | 0      | 0      | 0      | 0      | 0      | 0      | 0      |
| Rhizobiales             | 1              | 6              | 0      | 0      | 0      | 0      | 0      | 0      | 0      | 0      | 0      | 0      | 0      | 0      | 0      | 1      | 0      | 0      | 0      | 0      |
| Rhizobium               | 3              | 257            | 1      | 1      | 1      | 1      | 1      | 1      | 1      | 1      | 0      | 0      | 0      | 1      | 0      | 1      | 1      | 1      | 0      | 1      |
| Rhizobium/Agrobacterium | 2              | 87             | 0      | 0      | 0      | 0      | 0      | 0      | 0      | 0      | 0      | 0      | 0      | 0      | 0      | 1      | 0      | 1      | 0      | 0      |
| Rhodanobacter           | 1              | 21             | 0      | 1      | 0      | 0      | 0      | 0      | 0      | 0      | 0      | 0      | 1      | 0      | 0      | 1      | 0      | 0      | 0      | 1      |
| Rhodobacter             | 3              | 175            | 0      | 0      | 0      | 1      | 0      | 0      | 1      | 1      | 1      | 0      | 0      | 1      | 0      | 1      | 1      | 1      | 0      | 1      |
| Rhodobacteraceae        | 1              | 21             | 0      | 0      | 0      | 0      | 0      | 0      | 0      | 0      | 0      | 0      | 0      | 0      | 0      | 1      | 0      | 0      | 0      | 0      |
| Rhodobacterales         | 1              | 34             | 0      | 1      | 0      | 0      | 0      | 0      | 0      | 0      | 0      | 0      | 0      | 0      | 0      | 1      | 0      | 0      | 0      | 0      |
| Rhodococcus             | 2              | 292            | 1      | 1      | 1      | 1      | 1      | 1      | 1      | 1      | 0      | 0      | 0      | 1      | 0      | 1      | 1      | 1      | 0      | 1      |
| Rhodocyclaceae          | 1              | 7              | 0      | 0      | 0      | 0      | 0      | 0      | 0      | 0      | 0      | 0      | 0      | 0      | 0      | 0      | 0      | 0      | 0      | 0      |
| Rhodoferax              | 3              | 144            | 0      | 0      | 0      | 1      | 1      | 0      | 0      | 0      | 0      | 0      | 0      | 0      | 0      | 1      | 1      | 1      | 0      | 1      |
| Rhodomicrobium          | 2              | 103            | 0      | 0      | 0      | 1      | 0      | 0      | 0      | 0      | 1      | 0      | 0      | 0      | 0      | 1      | 0      | 1      | 0      | 0      |
| Rhodopirellula          | 2              | 87             | 0      | 0      | 0      | 0      | 0      | 0      | 1      | 0      | 0      | 0      | 0      | 1      | 0      | 0      | 0      | 1      | 0      | 0      |
| Rhodopseudomonas        | 3              | 246            | 0      | 1      | 0      | 1      | 1      | 0      | 0      | 1      | 1      | 0      | 0      | 1      | 0      | 1      | 1      | 1      | 0      | 1      |
| Rhodospirillum          | 2              | 121            | 0      | 1      | 0      | 0      | 0      | 0      | 0      | 0      | 1      | 0      | 0      | 0      | 0      | 1      | 1      | 0      | 0      | 1      |
| Rhodothermus            | 2              | 76             | 0      | 0      | 0      | 0      | 0      | 0      | 0      | 0      | 0      | 0      | 0      | 0      | 0      | 1      | 1      | 0      | 0      | 0      |
| Rhodovulum              | 1              | 4              | 0      | 0      | 0      | 0      | 0      | 0      | 0      | 0      | 0      | 0      | 0      | 0      | 0      | 0      | 0      | 0      | 0      | 0      |
| Richelia                | 1              | 2              | 0      | 0      | 0      | 0      | 0      | 0      | 0      | 0      | 0      | 0      | 0      | 0      | 0      | 0      | 0      | 0      | 0      | 0      |
| Rickettsia              | 2              | 43             | 0      | 0      | 0      | 0      | 0      | 0      | 0      | 0      | 0      | 0      | 0      | 1      | 0      | 1      | 0      | 0      | 0      | 0      |
| Rickettsiaceae          | 1              | 5              | 0      | 0      | 0      | 0      | 0      | 0      | 0      | 0      | 0      | 0      | 0      | 0      | 0      | 0      | 0      | 0      | 0      | 0      |
| Riemerella              | 2              | 61             | 0      | 1      | 0      | 0      | 0      | 0      | 0      | 0      | 0      | 0      | 0      | 0      | 0      | 1      | 1      | 0      | 1      | 0      |
| Rivularia               | 1              | 18             | 0      | 0      | 0      | 1      | 0      | 0      | 0      | 0      | 0      | 0      | 0      | 0      | 0      | 0      | 0      | 0      | 0      | 0      |
| Robiginitalea           | 2              | 83             | 0      | 1      | 0      | 0      | 0      | 0      | 0      | 0      | 0      | 0      | 0      | 0      | 0      | 1      | 1      | 0      | 1      | 1      |
| Roseburia               | 2              | 58             | 0      | 0      | 0      | 0      | 0      | 0      | 0      | 0      | 0      | 0      | 0      | 1      | 0      | 1      | 0      | 0      | 0      | 0      |
| Roseibium               | 1              | 3              | 0      | 0      | 0      | 0      | 0      | 0      | 0      | 0      | 0      | 0      | 0      | 0      | 0      | 0      | 0      | 0      | 0      | 0      |
| Roseiflexus             | 3              | 100            | 0      | 0      | 0      | 0      | 0      | 0      | 0      | 0      | 0      | 0      | 0      | 1      | 0      | 1      | 1      | 0      | 1      | 0      |
| Roseobacter             | 2              | 149            | 1      | 1      | 0      | 1      | 1      | 1      | 1      | 1      | 0      | 0      | 0      | 1      | 0      | 1      | 0      | 1      | 0      | 1      |
| Roseomonas              | 1              | 2              | 0      | 0      | 0      | 0      | 0      | 0      | 0      | 0      | 0      | 0      | 0      | 0      | 0      | 0      | 0      | 0      | 0      | 0      |
| Roseovarius             | 1              | 15             | 0      | 0      | 0      | 0      | 0      | 0      | 0      | 0      | 0      | 0      | 0      | 0      | 0      | 1      | 0      | 0      | 0      | 0      |
| Rothia                  | 1              | 44             | 0      | 0      | 0      | 0      | 0      | 0      | 0      | 0      | 0      | 0      | 0      | 1      | 0      | 0      | 0      | 0      | 0      | 0      |
| Rubrivivax              | 1              | 24             | 0      | 0      | 0      | 0      | 0      | 0      | 0      | 0      | 0      | 0      | 0      | 0      | 0      | 1      | 0      | 0      | 0      | 1      |
| Rubrobacter             | 3              | 117            | 1      | 0      | 0      | 0      | 1      | 0      | 0      | 0      | 0      | 0      | 0      | 0      | 0      | 1      | 1      | 0      | 0      | 0      |
| Ruegeria                | 2              | 189            | 1      | 1      | 0      | 1      | 1      | 0      | 0      | 1      | 0      | 0      | 0      | 0      | 0      | 1      | 1      | 1      | 0      | 1      |

| Genus             | Cluster Number | Protein Counts | K00448 | K00451 | K00462 | K00480 | K00481 | K00485 | K00492 | K00493 | K00531 | K00539 | K00569 | K00599 | K00622 | K00626 | K00632 | K00680 | K00757 | K00758 |
|-------------------|----------------|----------------|--------|--------|--------|--------|--------|--------|--------|--------|--------|--------|--------|--------|--------|--------|--------|--------|--------|--------|
| Ruminococcaceae   | 1              | 2              | 0      | 0      | 0      | 0      | 0      | 0      | 0      | 0      | 0      | 0      | 0      | 0      | 0      | 0      | 0      | 0      | 0      | 0      |
| Ruminococcus      | 2              | 101            | 0      | 0      | 0      | 0      | 0      | 0      | 0      | 0      | 0      | 0      | 0      | 1      | 0      | 1      | 0      | 0      | 1      | 0      |
| Runella           | 1              | 26             | 1      | 1      | 0      | 0      | 1      | 0      | 0      | 0      | 0      | 0      | 0      | 0      | 0      | 1      | 1      | 0      | 0      | 0      |
| Saccharomonospora | 2              | 132            | 1      | 1      | 0      | 1      | 1      | 0      | 0      | 0      | 0      | 0      | 0      | 1      | 0      | 1      | 0      | 0      | 0      | 1      |
| Saccharophagus    | 2              | 81             | 0      | 0      | 0      | 0      | 0      | 0      | 0      | 0      | 0      | 0      | 0      | 0      | 0      | 1      | 1      | 0      | 0      | 0      |
| Saccharopolyspora | 3              | 194            | 1      | 1      | 0      | 0      | 1      | 0      | 1      | 1      | 0      | 0      | 0      | 1      | 0      | 1      | 1      | 1      | 0      | 1      |
| Saccharothrix     | 1              | 32             | 1      | 1      | 0      | 1      | 1      | 0      | 0      | 0      | 0      | 0      | 0      | 0      | 0      | 1      | 0      | 0      | 1      | 1      |
| Sagittula         | 1              | 10             | 0      | 0      | 0      | 0      | 0      | 0      | 0      | 0      | 0      | 0      | 0      | 0      | 0      | 1      | 0      | 0      | 0      | 0      |
| Salinibacter      | 2              | 77             | 0      | 0      | 0      | 0      | 0      | 0      | 0      | 0      | 0      | 0      | 0      | 1      | 0      | 1      | 1      | 0      | 0      | 0      |
| Salinimonas       | 1              | 1              | 0      | 0      | 0      | 0      | 0      | 0      | 0      | 0      | 0      | 0      | 0      | 0      | 0      | 0      | 1      | 0      | 0      | 0      |
| Salinispora       | 3              | 127            | 0      | 1      | 0      | 0      | 0      | 0      | 0      | 0      | 0      | 0      | 0      | 1      | 0      | 1      | 1      | 0      | 0      | 1      |
| Salinivibrio      | 1              | 2              | 0      | 0      | 0      | 0      | 0      | 0      | 0      | 0      | 0      | 0      | 0      | 0      | 0      | 0      | 0      | 0      | 0      | 0      |
| Salmonella        | 2              | 151            | 0      | 0      | 0      | 1      | 0      | 0      | 0      | 0      | 0      | 0      | 0      | 1      | 0      | 1      | 1      | 1      | 1      | 1      |
| Sanguibacter      | 2              | 73             | 0      | 0      | 0      | 0      | 0      | 0      | 0      | 0      | 0      | 0      | 0      | 1      | 0      | 1      | 1      | 0      | 0      | 0      |
| Saprospira        | 1              | 13             | 0      | 1      | 0      | 0      | 0      | 0      | 0      | 0      | 0      | 0      | 0      | 0      | 0      | 1      | 0      | 0      | 1      | 0      |
| Scardovia         | 1              | 1              | 0      | 0      | 0      | 0      | 0      | 0      | 0      | 0      | 0      | 0      | 0      | 0      | 0      | 0      | 0      | 0      | 0      | 0      |
| Scytonema         | 1              | 10             | 0      | 0      | 0      | 0      | 0      | 0      | 0      | 0      | 0      | 0      | 0      | 0      | 0      | 0      | 0      | 0      | 0      | 0      |
| Sebaldella        | 2              | 69             | 0      | 0      | 0      | 0      | 0      | 0      | 0      | 0      | 0      | 0      | 0      | 1      | 0      | 0      | 0      | 1      | 1      | 0      |
| Segniliparus      | 2              | 85             | 0      | 0      | 0      | 1      | 0      | 0      | 0      | 1      | 0      | 0      | 0      | 1      | 0      | 1      | 0      | 0      | 0      | 1      |
| Selenomonas       | 2              | 57             | 0      | 0      | 0      | 0      | 0      | 0      | 0      | 0      | 0      | 0      | 0      | 0      | 0      | 0      | 0      | 0      | 0      | 0      |
| Serinicoccus      | 1              | 1              | 0      | 0      | 0      | 0      | 0      | 0      | 0      | 0      | 0      | 0      | 0      | 0      | 0      | 0      | 0      | 0      | 0      | 0      |
| Serratia          | 2              | 186            | 1      | 0      | 0      | 0      | 1      | 0      | 0      | 0      | 0      | 0      | 0      | 0      | 0      | 1      | 1      | 1      | 1      | 1      |
| Shewanella        | 3              | 214            | 0      | 1      | 0      | 0      | 0      | 0      | 1      | 0      | 0      | 0      | 1      | 0      | 0      | 1      | 1      | 0      | 1      | 1      |
| Shigella          | 2              | 172            | 0      | 0      | 0      | 1      | 0      | 0      | 0      | 0      | 0      | 0      | 0      | 0      | 0      | 1      | 1      | 1      | 1      | 1      |
| Shinella          | 1              | 2              | 0      | 0      | 0      | 0      | 0      | 0      | 0      | 0      | 0      | 0      | 0      | 0      | 0      | 0      | 0      | 0      | 0      | 0      |
| Sideroxydans      | 2              | 81             | 0      | 0      | 0      | 0      | 0      | 0      | 0      | 0      | 0      | 0      | 1      | 0      | 0      | 0      | 1      | 0      | 0      | 0      |
| Silicibacter      | 2              | 105            | 0      | 1      | 0      | 0      | 1      | 0      | 0      | 1      | 0      | 0      | 0      | 0      | 0      | 1      | 1      | 0      | 0      | 0      |
| Simiduia          | 1              | 18             | 0      | 1      | 0      | 0      | 0      | 0      | 0      | 0      | 0      | 0      | 1      | 0      | 0      | 1      | 0      | 0      | 0      | 0      |
| Simkania          | 1              | 6              | 0      | 0      | 0      | 0      | 0      | 0      | 0      | 0      | 0      | 0      | 0      | 1      | 0      | 0      | 0      | 0      | 0      | 0      |
| Simonsiella       | 1              | 2              | 0      | 0      | 0      | 0      | 0      | 0      | 0      | 0      | 0      | 0      | 0      | 0      | 0      | 0      | 0      | 0      | 0      | 0      |
| Singulisphaera    | 1              | 18             | 0      | 1      | 0      | 0      | 0      | 0      | 0      | 0      | 0      | 0      | 0      | 0      | 0      | 1      | 0      | 0      | 0      | 0      |
| Sinorhizobium     | 3              | 207            | 1      | 1      | 0      | 1      | 1      | 1      | 1      | 1      | 0      | 0      | 0      | 1      | 0      | 1      | 1      | 1      | 0      | 1      |
| Slackia           | 2              | 46             | 0      | 0      | 0      | 0      | 0      | 0      | 0      | 0      | 0      | 0      | 0      | 1      | 0      | 0      | 0      | 0      | 0      | 0      |
| Smaragdicoccus    | 1              | 3              | 0      | 0      | 0      | 0      | 0      | 0      | 0      | 0      | 0      | 0      | 0      | 0      | 0      | 0      | 0      | 0      | 0      | 0      |
| Sodalis           | 2              | 71             | 0      | 0      | 0      | 1      | 0      | 0      | 0      | 0      | 0      | 0      | 0      | 0      | 0      | 0      | 0      | 0      | 1      | 1      |
| Solibacillus      | 1              | 23             | 0      | 0      | 0      | 1      | 0      | 0      | 0      | 0      | 0      | 0      | 0      | 0      | 0      | 1      | 0      | 0      | 0      | 0      |
| Solitaea          | 1              | 13             | 0      | 1      | 0      | 0      | 0      | 0      | 0      | 0      | 0      | 0      | 0      | 0      | 0      | 1      | 0      | 0      | 1      | 0      |
| Sorangium         | 3              | 115            | 0      | 1      | 0      | 0      | 0      | 0      | 0      | 0      | 0      | 0      | 0      | 1      | 0      | 1      | 1      | 0      | 0      | 0      |
| Sphaerobacter     | 2              | 100            | 1      | 0      | 0      | 0      | 1      | 0      | 1      | 0      | 0      | 0      | 0      | 0      | 0      | 1      | 1      | 0      | 0      | 0      |
| Sphaerochaeta     | 1              | 42             | 0      | 0      | 0      | 0      | 0      | 0      | 0      | 0      | 0      | 0      | 0      | 0      | 0      | 1      | 0      | 0      | 1      | 0      |
| Sphingobacterium  | 3              | 85             | 0      | 0      | 0      | 0      | 0      | 0      | 0      | 0      | 0      | 0      | 0      | 0      | 0      | 1      | 1      | 0      | 1      | 0      |
| Sphingobium       | 1              | 179            | 0      | 1      | 1      | 1      | 1      | 0      | 0      | 0      | 0      | 0      | 0      | 0      | 0      | 1      | 0      | 0      | 0      | 1      |
| Sphingomonadaceae | 1              | 15             | 0      | 0      | 0      | 0      | 0      | 0      | 0      | 0      | 0      | 0      | 0      | 0      | 0      | 1      | 0      | 0      | 0      | 1      |
| Sphingomonas      | 2              | 220            | 1      | 1      | 1      | 0      | 0      | 0      | 0      | 0      | 0      | 0      | 0      | 0      | 0      | 1      | 1      | 0      | 0      | 1      |
| Sphingopyxis      | 3              | 99             | 0      | 0      | 0      | 0      | 0      | 0      | 0      | 0      | 0      | 0      | 0      | 0      | 0      | 1      | 1      | 0      | 0      | 1      |
| Spirochaeta       | 2              | 103            | 0      | 0      | 0      | 0      | 0      | 0      | 0      | 0      | 0      | 0      | 0      | 0      | 0      | 1      | 0      | 0      | 1      | 0      |
| Spiroplasma       | 1              | 6              | 0      | 0      | 0      | 0      | 0      | 0      | 0      | 0      | 0      | 0      | 0      | 0      | 0      | 0      | 0      | 0      | 0      | 0      |
| Spirosoma         | 2              | 107            | 1      | 1      | 0      | 0      | 1      | 0      | 0      | 0      | 0      | 0      | 1      | 0      | 0      | 1      | 1      | 0      | 0      | 0      |
| Stackebrandtia    | 2              | 110            | 1      | 1      | 0      | 0      | 0      | 0      | 1      | 0      | 0      | 0      | 0      | 1      | 0      | 1      | 1      | 0      | 0      | 1      |
| Stanieria         | 1              | 17             | 0      | 1      | 0      | 0      | 0      | 0      | 0      | 0      | 0      | 0      | 0      | 0      | 0      | 1      | 0      | 0      | 1      | 0      |
| Staphylococcus    | 2              | 108            | 0      | 0      | 0      | 0      | 0      | 0      | 1      | 0      | 0      | 0      | 0      | 0      | 0      | 1      | 1      | 1      | 0      | 0      |
| Staphylothermus   | 1              | 12             | 0      | 0      | 0      | 0      | 0      | 0      | 0      | 0      | 0      | 0      | 0      | 0      | 0      | 1      | 1      | 0      | 1      | 1      |

| Genus                  | Cluster Number | Protein Counts | K00448 | K00451 | K00462 | K00480 | K00481 | K00485 | K00492 | K00493 | K00531 | K00539 | K00569 | K00599 | K00622 | K00626 | K00632 | K00680 | K00757 | K00758 |
|------------------------|----------------|----------------|--------|--------|--------|--------|--------|--------|--------|--------|--------|--------|--------|--------|--------|--------|--------|--------|--------|--------|
| Stappia                | 1              | 2              | 0      | 0      | 0      | 0      | 0      | 0      | 0      | 0      | 0      | 0      | 0      | 0      | 0      | 0      | 0      | 0      | 0      | 0      |
| Starkeya               | 3              | 134            | 0      | 0      | 0      | 1      | 0      | 0      | 0      | 0      | 0      | 0      | 1      | 1      | 0      | 1      | 0      | 0      | 0      | 1      |
| Stenotrophomonas       | 3              | 104            | 1      | 1      | 0      | 0      | 0      | 0      | 0      | 0      | 0      | 0      | 0      | 0      | 0      | 1      | 1      | 0      | 0      | 0      |
| Stigmatella            | 3              | 129            | 1      | 1      | 0      | 0      | 1      | 0      | 0      | 0      | 0      | 0      | 0      | 0      | 0      | 1      | 1      | 0      | 0      | 0      |
| Streptobacillus        | 1              | 38             | 0      | 0      | 0      | 0      | 0      | 0      | 0      | 0      | 0      | 0      | 0      | 1      | 0      | 1      | 0      | 0      | 0      | 0      |
| Streptococcus          | 2              | 121            | 0      | 0      | 0      | 0      | 0      | 0      | 0      | 0      | 0      | 0      | 0      | 1      | 0      | 1      | 1      | 1      | 1      | 0      |
| Streptomyces           | 2              | 253            | 1      | 1      | 0      | 1      | 1      | 0      | 1      | 1      | 0      | 0      | 0      | 1      | 0      | 1      | 1      | 1      | 1      | 1      |
| Streptosporangium      | 3              | 148            | 1      | 1      | 0      | 1      | 1      | 0      | 0      | 0      | 0      | 0      | 0      | 1      | 0      | 1      | 1      | 0      | 0      | 1      |
| Strigomonas            | 1              | 2              | 0      | 0      | 0      | 0      | 0      | 0      | 0      | 0      | 0      | 0      | 0      | 0      | 0      | 0      | 0      | 0      | 0      | 0      |
| Sulfitobacter          | 1              | 10             | 0      | 1      | 0      | 0      | 0      | 0      | 0      | 0      | 0      | 0      | 0      | 0      | 0      | 1      | 0      | 0      | 0      | 0      |
| Sulfobacillus          | 1              | 30             | 0      | 0      | 0      | 0      | 0      | 0      | 0      | 0      | 0      | 0      | 0      | 0      | 0      | 1      | 1      | 0      | 0      | 0      |
| Sulfolobus             | 1              | 23             | 0      | 1      | 0      | 0      | 0      | 0      | 0      | 0      | 0      | 0      | 0      | 0      | 0      | 1      | 1      | 0      | 0      | 0      |
| Sulfuricurvum          | 2              | 67             | 0      | 0      | 0      | 0      | 0      | 0      | 0      | 0      | 0      | 0      | 0      | 0      | 0      | 0      | 0      | 0      | 0      | 0      |
| Sulfurihydrogenibium   | 2              | 55             | 0      | 0      | 0      | 0      | 0      | 0      | 0      | 0      | 0      | 0      | 0      | 0      | 0      | 0      | 0      | 0      | 0      | 0      |
| Sulfurimonas           | 2              | 60             | 0      | 0      | 0      | 0      | 0      | 0      | 0      | 0      | 0      | 0      | 0      | 1      | 0      | 0      | 0      | 0      | 0      | 0      |
| Sulfurospirillum       | 1              | 48             | 0      | 0      | 0      | 0      | 0      | 0      | 0      | 0      | 0      | 0      | 0      | 0      | 0      | 0      | 0      | 0      | 0      | 0      |
| Sulfurovum             | 2              | 48             | 0      | 0      | 0      | 0      | 0      | 0      | 0      | 0      | 0      | 0      | 0      | 0      | 0      | 0      | 0      | 0      | 0      | 0      |
| Symbiobacterium        | 2              | 68             | 0      | 0      | 0      | 0      | 0      | 0      | 0      | 0      | 0      | 0      | 0      | 0      | 0      | 1      | 1      | 0      | 1      | 0      |
| Synechococcus          | 1              | 34             | 0      | 0      | 0      | 0      | 0      | 0      | 0      | 0      | 0      | 0      | 1      | 1      | 0      | 0      | 0      | 1      | 0      | 0      |
| Synechocystis          | 1              | 40             | 0      | 0      | 0      | 0      | 0      | 0      | 0      | 0      | 0      | 0      | 0      | 1      | 0      | 1      | 0      | 0      | 0      | 0      |
| Synergistetes          | 1              | 27             | 0      | 0      | 0      | 0      | 0      | 0      | 0      | 0      | 0      | 0      | 0      | 0      | 0      | 0      | 0      | 0      | 0      | 0      |
| Syntrophobacter        | 2              | 101            | 0      | 0      | 0      | 0      | 0      | 0      | 0      | 0      | 0      | 0      | 0      | 0      | 0      | 1      | 1      | 0      | 0      | 0      |
| Syntrophobotulus       | 2              | 71             | 0      | 0      | 0      | 0      | 0      | 0      | 0      | 0      | 1      | 0      | 0      | 1      | 0      | 0      | 0      | 0      | 0      | 0      |
| Syntrophomonas         | 2              | 58             | 0      | 0      | 0      | 0      | 0      | 0      | 0      | 0      | 0      | 0      | 0      | 0      | 0      | 1      | 0      | 0      | 0      | 0      |
| Syntrophothermus       | 2              | 60             | 0      | 0      | 0      | 0      | 0      | 0      | 0      | 0      | 0      | 0      | 0      | 0      | 0      | 1      | 0      | 0      | 0      | 0      |
| Syntrophus             | 2              | 66             | 0      | 0      | 0      | 0      | 0      | 0      | 0      | 0      | 0      | 0      | 0      | 0      | 0      | 1      | 0      | 0      | 0      | 0      |
| Tannerella             | 1              | 8              | 0      | 0      | 0      | 0      | 0      | 0      | 0      | 0      | 0      | 0      | 0      | 0      | 0      | 0      | 0      | 0      | 1      | 0      |
| Taylorella             | 1              | 43             | 0      | 0      | 0      | 0      | 0      | 0      | 0      | 0      | 0      | 0      | 0      | 1      | 0      | 0      | 0      | 0      | 0      | 0      |
| Tepidanaerobacter      | 2              | 55             | 0      | 0      | 0      | 0      | 0      | 0      | 0      | 0      | 0      | 0      | 0      | 0      | 0      | 0      | 0      | 0      | 0      | 0      |
| Teredinibacter         | 2              | 109            | 0      | 0      | 0      | 0      | 0      | 0      | 0      | 0      | 0      | 0      | 1      | 0      | 0      | 1      | 1      | 0      | 0      | 0      |
| Terrabacter            | 1              | 1              | 0      | 0      | 0      | 0      | 0      | 0      | 0      | 0      | 0      | 0      | 0      | 0      | 0      | 0      | 0      | 0      | 0      | 0      |
| Terriglobus            | 2              | 83             | 0      | 0      | 0      | 0      | 1      | 0      | 0      | 0      | 0      | 0      | 0      | 0      | 0      | 0      | 0      | 0      | 0      | 0      |
| Tetragenococcus        | 1              | 12             | 0      | 0      | 0      | 0      | 0      | 0      | 0      | 0      | 0      | 0      | 0      | 0      | 0      | 0      | 0      | 0      | 0      | 0      |
| Thalassiobium          | 1              | 11             | 0      | 0      | 0      | 0      | 0      | 0      | 0      | 0      | 0      | 0      | 0      | 0      | 0      | 1      | 0      | 0      | 0      | 0      |
| Thalassobacter         | 1              | 9              | 0      | 1      | 0      | 0      | 0      | 0      | 0      | 0      | 0      | 0      | 0      | 0      | 0      | 1      | 0      | 0      | 0      | 0      |
| Thalassolituus         | 1              | 12             | 0      | 0      | 0      | 0      | 0      | 0      | 0      | 0      | 0      | 0      | 1      | 0      | 0      | 1      | 0      | 0      | 0      | 1      |
| Thalassospira          | 1              | 2              | 0      | 0      | 0      | 0      | 0      | 0      | 0      | 0      | 0      | 0      | 0      | 0      | 0      | 0      | 0      | 0      | 0      | 0      |
| Thauera                | 1              | 111            | 0      | 0      | 0      | 1      | 0      | 0      | 0      | 0      | 0      | 0      | 0      | 0      | 0      | 1      | 1      | 0      | 0      | 1      |
| Thermacetogenium       | 1              | 7              | 0      | 0      | 0      | 0      | 0      | 0      | 0      | 0      | 0      | 0      | 0      | 0      | 0      | 0      | 0      | 0      | 0      | 0      |
| Thermaerobacter        | 2              | 79             | 0      | 0      | 0      | 0      | 0      | 0      | 0      | 0      | 0      | 0      | 0      | 1      | 0      | 1      | 1      | 0      | 0      | 0      |
| Thermanaerovibrio      | 2              | 58             | 0      | 0      | 0      | 0      | 0      | 0      | 0      | 0      | 0      | 0      | 0      | 0      | 0      | 0      | 0      | 0      | 0      | 0      |
| Thermincola            | 2              | 62             | 0      | 0      | 0      | 0      | 0      | 0      | 0      | 0      | 0      | 0      | 0      | 0      | 0      | 0      | 0      | 0      | 0      | 0      |
| Thermoanaerobacter     | 2              | 76             | 0      | 0      | 0      | 0      | 0      | 0      | 0      | 0      | 0      | 0      | 0      | 1      | 0      | 1      | 0      | 1      | 0      | 0      |
| Thermoanaerobacterium  | 2              | 64             | 0      | 0      | 0      | 0      | 0      | 0      | 0      | 0      | 0      | 0      | 0      | 0      | 0      | 1      | 0      | 0      | 1      | 0      |
| Thermobacillus         | 1              | 11             | 0      | 0      | 0      | 0      | 0      | 0      | 0      | 0      | 0      | 0      | 0      | 0      | 0      | 1      | 0      | 0      | 1      | 0      |
| Thermobaculum          | 2              | 62             | 0      | 0      | 0      | 0      | 0      | 0      | 0      | 0      | 0      | 0      | 0      | 0      | 0      | 1      | 0      | 0      | 0      | 0      |
| Thermobifida           | 2              | 72             | 0      | 0      | 0      | 0      | 0      | 0      | 1      | 0      | 0      | 0      | 0      | 1      | 0      | 1      | 1      | 0      | 0      | 0      |
| Thermobispora          | 2              | 109            | 1      | 1      | 0      | 0      | 1      | 0      | 0      | 0      | 0      | 0      | 0      | 1      | 0      | 1      | 1      | 0      | 0      | 1      |
| Thermococcus           | 1              | 13             | 0      | 0      | 0      | 0      | 0      | 0      | 0      | 0      | 0      | 0      | 0      | 0      | 0      | 1      | 0      | 0      | 1      | 1      |
| Thermocrinis           | 2              | 60             | 0      | 0      | 0      | 0      | 0      | 0      | 0      | 0      | 0      | 0      | 0      | 0      | 0      | 0      | 0      | 0      | 0      | 0      |
| Thermodesulfator       | 1              | 10             | 0      | 0      | 0      | 0      | 0      | 0      | 0      | 0      | 0      | 0      | 0      | 0      | 0      | 0      | 0      | 0      | 0      | 0      |
| Thermodesulfobacterium | 1              | 9              | 0      | 0      | 0      | 0      | 0      | 0      | 0      | 0      | 0      | 0      | 0      | 0      | 0      | 0      | 0      | 0      | 0      | 0      |



| Genus                       | Cluster Number | Protein Counts | K00448 | K00451 | K00462 | K00480 | K00481 | K00485 | K00492 | K00493 | K00531 | K00539 | K00569 | K00599 | K00622 | K00626 | K00632 | K00680 | K00757 | K00758 |
|-----------------------------|----------------|----------------|--------|--------|--------|--------|--------|--------|--------|--------|--------|--------|--------|--------|--------|--------|--------|--------|--------|--------|
| <i>Thermodesulfobium</i>    | 1              | 13             | 0      | 0      | 0      | 0      | 0      | 0      | 0      | 0      | 0      | 0      | 0      | 1      | 0      | 0      | 0      | 0      | 0      | 0      |
| <i>Thermodesulfovibrio</i>  | 2              | 60             | 0      | 0      | 0      | 0      | 0      | 0      | 0      | 0      | 0      | 0      | 0      | 0      | 0      | 0      | 0      | 0      | 0      | 0      |
| <i>Thermofilum</i>          | 1              | 9              | 0      | 0      | 0      | 0      | 0      | 0      | 0      | 0      | 0      | 0      | 0      | 0      | 0      | 1      | 0      | 0      | 1      | 1      |
| <i>Thermogladus</i>         | 1              | 7              | 0      | 0      | 0      | 0      | 0      | 0      | 0      | 0      | 0      | 0      | 0      | 0      | 0      | 1      | 0      | 0      | 1      | 1      |
| <i>Thermomicrobium</i>      | 2              | 92             | 0      | 0      | 0      | 0      | 0      | 0      | 0      | 0      | 0      | 0      | 0      | 0      | 0      | 1      | 0      | 0      | 0      | 0      |
| <i>Thermomonospora</i>      | 2              | 125            | 1      | 1      | 1      | 0      | 1      | 0      | 0      | 0      | 0      | 0      | 0      | 1      | 0      | 1      | 1      | 0      | 0      | 1      |
| <i>Thermoplasma</i>         | 1              | 11             | 0      | 0      | 0      | 0      | 0      | 0      | 0      | 0      | 0      | 0      | 0      | 0      | 0      | 1      | 0      | 0      | 0      | 0      |
| <i>Thermoplasmatales</i>    | 1              | 6              | 0      | 0      | 0      | 0      | 0      | 0      | 0      | 0      | 0      | 0      | 0      | 0      | 0      | 1      | 0      | 0      | 0      | 1      |
| <i>Thermoproteus</i>        | 1              | 12             | 0      | 0      | 0      | 0      | 0      | 0      | 0      | 0      | 0      | 0      | 0      | 0      | 0      | 1      | 0      | 0      | 1      | 0      |
| <i>Thermosediminibacter</i> | 2              | 64             | 0      | 0      | 0      | 0      | 0      | 0      | 0      | 0      | 0      | 0      | 0      | 0      | 0      | 0      | 0      | 0      | 0      | 0      |
| <i>Thermosipho</i>          | 2              | 70             | 0      | 0      | 0      | 0      | 0      | 0      | 0      | 0      | 0      | 0      | 0      | 0      | 0      | 1      | 0      | 0      | 0      | 0      |
| <i>Thermosphaera</i>        | 1              | 10             | 0      | 0      | 0      | 0      | 0      | 0      | 0      | 0      | 0      | 0      | 0      | 0      | 0      | 1      | 0      | 0      | 1      | 1      |
| <i>Thermosynechococcus</i>  | 1              | 6              | 0      | 0      | 0      | 0      | 0      | 0      | 0      | 0      | 0      | 0      | 0      | 1      | 0      | 0      | 0      | 0      | 0      | 0      |
| <i>Thermotoga</i>           | 2              | 80             | 0      | 0      | 0      | 0      | 0      | 0      | 0      | 0      | 0      | 0      | 0      | 1      | 0      | 1      | 0      | 0      | 1      | 0      |
| <i>Thermovibrio</i>         | 2              | 58             | 0      | 0      | 0      | 0      | 0      | 0      | 0      | 0      | 0      | 0      | 0      | 0      | 0      | 0      | 0      | 0      | 0      | 0      |
| <i>Thermovirga</i>          | 1              | 9              | 0      | 0      | 0      | 0      | 0      | 0      | 0      | 0      | 0      | 0      | 0      | 0      | 0      | 0      | 0      | 0      | 0      | 0      |
| <i>Thermus</i>              | 2              | 107            | 0      | 0      | 0      | 0      | 1      | 0      | 0      | 0      | 0      | 0      | 0      | 1      | 0      | 1      | 1      | 1      | 0      | 1      |
| <i>Thioalkalimicrobium</i>  | 1              | 4              | 0      | 0      | 0      | 0      | 0      | 0      | 0      | 0      | 0      | 0      | 0      | 0      | 0      | 0      | 0      | 0      | 0      | 0      |
| <i>Thioalkalivibrio</i>     | 2              | 91             | 0      | 0      | 0      | 0      | 0      | 0      | 0      | 0      | 0      | 0      | 0      | 0      | 0      | 1      | 0      | 0      | 0      | 0      |
| <i>Thiobaca</i>             | 1              | 2              | 0      | 0      | 0      | 0      | 0      | 0      | 0      | 0      | 0      | 0      | 0      | 0      | 0      | 0      | 0      | 0      | 0      | 0      |
| <i>Thiobacillus</i>         | 2              | 67             | 0      | 0      | 0      | 0      | 0      | 0      | 0      | 0      | 0      | 0      | 0      | 1      | 0      | 0      | 0      | 0      | 0      | 0      |
| <i>Thiocapsa</i>            | 1              | 2              | 0      | 0      | 0      | 0      | 0      | 0      | 0      | 0      | 0      | 0      | 0      | 0      | 0      | 0      | 0      | 0      | 0      | 0      |
| <i>Thiocystis</i>           | 1              | 11             | 0      | 0      | 0      | 0      | 0      | 0      | 0      | 0      | 0      | 0      | 1      | 0      | 0      | 1      | 0      | 0      | 0      | 0      |
| <i>Thioflavococcus</i>      | 1              | 13             | 0      | 0      | 0      | 0      | 0      | 0      | 0      | 0      | 0      | 0      | 1      | 0      | 0      | 1      | 0      | 0      | 0      | 1      |
| <i>Thiomicrospira</i>       | 2              | 50             | 0      | 0      | 0      | 0      | 0      | 0      | 0      | 0      | 0      | 0      | 1      | 0      | 0      | 0      | 0      | 0      | 0      | 0      |
| <i>Thiomonas</i>            | 2              | 85             | 0      | 0      | 0      | 0      | 0      | 0      | 0      | 0      | 0      | 0      | 0      | 0      | 0      | 1      | 1      | 0      | 0      | 0      |
| <i>Thiorhodococcus</i>      | 1              | 2              | 0      | 0      | 0      | 0      | 0      | 0      | 0      | 0      | 0      | 0      | 0      | 0      | 0      | 0      | 0      | 0      | 0      | 0      |
| <i>Thiothrix</i>            | 1              | 2              | 0      | 0      | 0      | 0      | 0      | 0      | 0      | 0      | 0      | 0      | 0      | 0      | 0      | 0      | 0      | 0      | 0      | 0      |
| <i>Tistrella</i>            | 1              | 42             | 1      | 1      | 0      | 0      | 1      | 0      | 0      | 0      | 0      | 0      | 1      | 0      | 0      | 1      | 0      | 0      | 0      | 0      |
| <i>Tolumonas</i>            | 2              | 100            | 0      | 0      | 0      | 0      | 0      | 0      | 0      | 0      | 0      | 0      | 1      | 0      | 0      | 0      | 0      | 0      | 0      | 1      |
| <i>Transposon</i>           | 1              | 2              | 0      | 0      | 0      | 0      | 0      | 0      | 0      | 0      | 0      | 0      | 0      | 0      | 0      | 0      | 0      | 0      | 0      | 0      |
| <i>Treponema</i>            | 1              | 63             | 0      | 0      | 0      | 0      | 0      | 0      | 0      | 0      | 0      | 0      | 0      | 0      | 0      | 0      | 0      | 0      | 1      | 0      |
| <i>Trichodesmium</i>        | 2              | 71             | 0      | 0      | 0      | 1      | 0      | 1      | 0      | 0      | 0      | 0      | 0      | 1      | 0      | 0      | 0      | 0      | 0      | 0      |
| <i>Trichormus</i>           | 1              | 12             | 0      | 0      | 0      | 0      | 0      | 0      | 0      | 0      | 0      | 0      | 0      | 0      | 0      | 0      | 0      | 0      | 0      | 0      |
| <i>Tropheryma</i>           | 2              | 22             | 0      | 0      | 0      | 0      | 0      | 0      | 0      | 0      | 0      | 0      | 0      | 1      | 0      | 0      | 0      | 0      | 0      | 0      |
| <i>Truepera</i>             | 2              | 104            | 0      | 0      | 0      | 0      | 0      | 0      | 0      | 0      | 0      | 0      | 0      | 0      | 0      | 1      | 1      | 0      | 0      | 0      |
| <i>Tsukamurella</i>         | 2              | 123            | 1      | 0      | 0      | 1      | 0      | 0      | 0      | 0      | 0      | 0      | 0      | 1      | 0      | 1      | 1      | 0      | 0      | 1      |
| <i>Turneriella</i>          | 1              | 16             | 0      | 0      | 0      | 0      | 0      | 0      | 0      | 0      | 0      | 0      | 0      | 0      | 0      | 1      | 0      | 0      | 0      | 0      |
| <i>Uliginosibacterium</i>   | 1              | 2              | 0      | 0      | 0      | 0      | 0      | 0      | 0      | 0      | 0      | 0      | 0      | 0      | 0      | 0      | 0      | 0      | 0      | 0      |
| <i>Ureaplasma</i>           | 1              | 24             | 0      | 0      | 0      | 0      | 0      | 0      | 0      | 0      | 0      | 0      | 0      | 0      | 0      | 0      | 0      | 0      | 0      | 1      |
| <i>Ureibacillus</i>         | 1              | 2              | 0      | 0      | 0      | 0      | 0      | 0      | 0      | 0      | 0      | 0      | 0      | 0      | 0      | 0      | 0      | 0      | 0      | 0      |
| <i>Variovorax</i>           | 3              | 187            | 1      | 1      | 0      | 1      | 1      | 0      | 1      | 0      | 0      | 0      | 0      | 0      | 0      | 1      | 1      | 0      | 0      | 0      |
| <i>Veillonella</i>          | 1              | 54             | 0      | 0      | 0      | 0      | 0      | 0      | 0      | 0      | 0      | 0      | 0      | 0      | 0      | 1      | 0      | 0      | 0      | 0      |
| <i>Verminephrobacter</i>    | 3              | 188            | 0      | 0      | 0      | 1      | 1      | 0      | 0      | 0      | 0      | 0      | 0      | 0      | 0      | 1      | 1      | 0      | 0      | 0      |
| <i>Verrucosispora</i>       | 3              | 126            | 1      | 1      | 0      | 0      | 1      | 0      | 0      | 0      | 0      | 0      | 0      | 1      | 0      | 1      | 1      | 0      | 0      | 1      |
| <i>Vibrio</i>               | 2              | 195            | 0      | 1      | 0      | 0      | 1      | 0      | 0      | 0      | 0      | 0      | 1      | 1      | 0      | 1      | 1      | 1      | 1      | 1      |
| <i>Vibrionales</i>          | 1              | 46             | 0      | 0      | 0      | 0      | 0      | 0      | 0      | 0      | 0      | 0      | 0      | 0      | 0      | 0      | 1      | 0      | 1      | 1      |
| <i>Vitreoscilla</i>         | 1              | 1              | 0      | 0      | 0      | 0      | 0      | 0      | 0      | 0      | 0      | 0      | 0      | 0      | 0      | 0      | 0      | 0      | 0      | 0      |
| <i>Vulcanisaeta</i>         | 1              | 14             | 0      | 0      | 0      | 0      | 0      | 0      | 0      | 0      | 0      | 0      | 0      | 0      | 0      | 1      | 0      | 0      | 1      | 0      |
| <i>Waddlia</i>              | 2              | 68             | 0      | 0      | 0      | 0      | 0      | 0      | 0      | 0      | 0      | 0      | 0      | 1      | 0      | 1      | 1      | 0      | 0      | 0      |
| <i>Wautersia</i>            | 1              | 2              | 0      | 0      | 0      | 0      | 0      | 0      | 0      | 0      | 0      | 0      | 0      | 0      | 0      | 0      | 0      | 0      | 0      | 0      |
| <i>Weeksella</i>            | 2              | 65             | 0      | 1      | 0      | 0      | 0      | 1      | 0      | 0      | 0      | 0      | 0      | 0      | 0      | 1      | 1      | 0      | 1      | 0      |

| Genus             | Cluster Number | Protein Counts | K00448 | K00451 | K00462 | K00480 | K00481 | K00485 | K00492 | K00493 | K00531 | K00539 | K00569 | K00599 | K00622 | K00626 | K00632 | K00680 | K00757 | K00758 |
|-------------------|----------------|----------------|--------|--------|--------|--------|--------|--------|--------|--------|--------|--------|--------|--------|--------|--------|--------|--------|--------|--------|
| Weissella         | 1              | 14             | 0      | 0      | 0      | 0      | 0      | 0      | 0      | 0      | 0      | 0      | 0      | 1      | 0      | 1      | 0      | 1      | 0      | 0      |
| Wenxinia          | 1              | 2              | 0      | 0      | 0      | 0      | 0      | 0      | 0      | 0      | 0      | 0      | 0      | 0      | 0      | 0      | 0      | 0      | 0      | 0      |
| Wigglesworthia    | 1              | 29             | 0      | 0      | 0      | 0      | 0      | 0      | 0      | 0      | 0      | 0      | 0      | 0      | 0      | 0      | 0      | 0      | 0      | 0      |
| Wolbachia         | 1              | 32             | 0      | 0      | 0      | 0      | 0      | 0      | 0      | 0      | 0      | 0      | 0      | 1      | 0      | 0      | 0      | 0      | 0      | 0      |
| Wolinella         | 2              | 51             | 0      | 0      | 0      | 0      | 0      | 0      | 0      | 0      | 0      | 0      | 0      | 1      | 0      | 0      | 0      | 1      | 0      | 0      |
| Xanthobacter      | 3              | 176            | 1      | 1      | 1      | 1      | 1      | 0      | 0      | 0      | 0      | 0      | 1      | 0      | 0      | 1      | 1      | 0      | 0      | 0      |
| Xanthobacteraceae | 1              | 4              | 0      | 0      | 0      | 0      | 0      | 0      | 0      | 0      | 0      | 0      | 0      | 0      | 0      | 0      | 0      | 0      | 0      | 0      |
| Xanthomonadaceae  | 1              | 39             | 0      | 1      | 0      | 0      | 0      | 0      | 0      | 0      | 0      | 0      | 0      | 0      | 0      | 0      | 1      | 0      | 0      | 0      |
| Xanthomonas       | 2              | 162            | 1      | 1      | 0      | 0      | 1      | 1      | 0      | 0      | 0      | 0      | 1      | 1      | 0      | 1      | 1      | 0      | 0      | 0      |
| Xenorhabdus       | 2              | 127            | 0      | 0      | 0      | 0      | 0      | 0      | 0      | 0      | 0      | 0      | 0      | 0      | 0      | 0      | 1      | 0      | 1      | 1      |
| Xylanimonas       | 2              | 66             | 0      | 0      | 0      | 0      | 0      | 0      | 1      | 0      | 0      | 0      | 0      | 1      | 0      | 1      | 1      | 0      | 0      | 1      |
| Xylella           | 2              | 52             | 0      | 0      | 0      | 0      | 0      | 0      | 0      | 0      | 0      | 0      | 0      | 0      | 0      | 0      | 0      | 0      | 0      | 0      |
| Yersinia          | 2              | 145            | 0      | 0      | 0      | 0      | 0      | 0      | 0      | 0      | 0      | 0      | 0      | 1      | 0      | 0      | 1      | 1      | 1      | 1      |
| Yokenella         | 2              | 61             | 0      | 0      | 0      | 0      | 0      | 0      | 0      | 0      | 0      | 0      | 0      | 0      | 0      | 1      | 1      | 0      | 1      | 1      |
| Zobellia          | 1              | 28             | 0      | 1      | 0      | 0      | 0      | 0      | 0      | 0      | 0      | 0      | 0      | 0      | 0      | 1      | 1      | 0      | 1      | 0      |
| Zunongwangia      | 2              | 98             | 0      | 1      | 0      | 0      | 0      | 0      | 0      | 0      | 0      | 0      | 0      | 0      | 0      | 1      | 1      | 0      | 1      | 1      |
| Zymomonas         | 2              | 67             | 0      | 0      | 0      | 0      | 0      | 0      | 0      | 0      | 1      | 0      | 0      | 0      | 0      | 0      | 0      | 0      | 0      | 0      |
| Zymophilus        | 1              | 2              | 0      | 0      | 0      | 0      | 0      | 0      | 0      | 0      | 0      | 0      | 0      | 0      | 0      | 0      | 0      | 0      | 0      | 0      |

| Genus               | Cluster Number | Protein Counts | K00760 | K00799 | K00857 | K00876 | K01026 | K01031 | K01034 | K01039 | K01041 | K01045 | K01053 | K01055 | K01061 | K01066 | K01075 | K01077 | K01078 | K01101 |
|---------------------|----------------|----------------|--------|--------|--------|--------|--------|--------|--------|--------|--------|--------|--------|--------|--------|--------|--------|--------|--------|--------|
| Acaricomes          | 1              | 2              | 1      | 0      | 0      | 0      | 0      | 0      | 0      | 0      | 0      | 0      | 0      | 0      | 0      | 0      | 0      | 0      | 0      | 0      |
| Acaryochloris       | 2              | 88             | 0      | 1      | 0      | 1      | 0      | 0      | 0      | 0      | 0      | 0      | 0      | 0      | 1      | 0      | 0      | 0      | 0      | 0      |
| Acetivibrio         | 1              | 2              | 0      | 0      | 0      | 0      | 0      | 0      | 0      | 0      | 0      | 0      | 0      | 0      | 0      | 0      | 0      | 0      | 0      | 0      |
| Acetobacter         | 2              | 85             | 0      | 1      | 0      | 0      | 0      | 0      | 0      | 0      | 0      | 0      | 1      | 0      | 1      | 0      | 0      | 0      | 0      | 0      |
| Acetobacteraceae    | 1              | 2              | 0      | 0      | 0      | 0      | 0      | 0      | 0      | 0      | 0      | 0      | 0      | 0      | 0      | 0      | 0      | 0      | 0      | 0      |
| Acetobacterium      | 1              | 8              | 1      | 0      | 0      | 0      | 1      | 0      | 1      | 0      | 0      | 0      | 0      | 0      | 0      | 0      | 0      | 0      | 0      | 0      |
| Acetohalobium       | 2              | 79             | 1      | 0      | 0      | 0      | 0      | 0      | 1      | 0      | 0      | 0      | 0      | 0      | 0      | 0      | 0      | 0      | 0      | 0      |
| Acholeplasma        | 2              | 38             | 1      | 0      | 1      | 1      | 0      | 0      | 0      | 0      | 0      | 0      | 0      | 0      | 0      | 0      | 0      | 0      | 0      | 0      |
| Achromobacter       | 2              | 192            | 0      | 1      | 0      | 0      | 0      | 1      | 0      | 1      | 0      | 0      | 1      | 1      | 1      | 0      | 1      | 0      | 0      | 0      |
| Acidaminococcus     | 1              | 65             | 1      | 0      | 0      | 1      | 0      | 0      | 0      | 1      | 0      | 0      | 0      | 0      | 0      | 0      | 0      | 1      | 0      | 0      |
| Acidianus           | 1              | 9              | 0      | 0      | 0      | 0      | 0      | 0      | 0      | 1      | 0      | 0      | 0      | 0      | 0      | 0      | 0      | 0      | 0      | 0      |
| Acidilobus          | 1              | 8              | 0      | 0      | 0      | 0      | 0      | 0      | 0      | 1      | 0      | 0      | 0      | 0      | 0      | 0      | 0      | 0      | 0      | 0      |
| Acidimicrobium      | 2              | 58             | 1      | 0      | 0      | 0      | 0      | 0      | 0      | 0      | 0      | 0      | 0      | 1      | 1      | 0      | 0      | 0      | 0      | 0      |
| Acidiphilium        | 3              | 144            | 0      | 1      | 0      | 0      | 0      | 1      | 0      | 0      | 0      | 0      | 1      | 0      | 1      | 0      | 0      | 0      | 1      | 0      |
| Acidithiobacillus   | 2              | 70             | 1      | 1      | 0      | 0      | 0      | 0      | 0      | 0      | 0      | 0      | 0      | 0      | 1      | 0      | 0      | 0      | 0      | 0      |
| Acidobacterium      | 2              | 91             | 1      | 0      | 0      | 1      | 0      | 0      | 0      | 0      | 0      | 0      | 1      | 0      | 1      | 0      | 0      | 0      | 0      | 0      |
| Acidocella          | 1              | 2              | 0      | 0      | 0      | 0      | 0      | 0      | 0      | 0      | 0      | 0      | 0      | 0      | 0      | 0      | 0      | 0      | 0      | 0      |
| Acidothermus        | 2              | 68             | 1      | 0      | 0      | 0      | 0      | 0      | 0      | 1      | 0      | 0      | 0      | 0      | 1      | 0      | 0      | 0      | 0      | 0      |
| Acidovorax          | 3              | 217            | 0      | 1      | 0      | 0      | 1      | 1      | 0      | 0      | 0      | 0      | 1      | 1      | 1      | 0      | 1      | 0      | 0      | 0      |
| Aciduliprofundum    | 1              | 11             | 0      | 0      | 0      | 0      | 0      | 0      | 0      | 0      | 0      | 0      | 0      | 0      | 0      | 0      | 0      | 0      | 0      | 1      |
| Acinetobacter       | 3              | 188            | 1      | 1      | 0      | 0      | 0      | 1      | 0      | 0      | 0      | 0      | 1      | 1      | 1      | 1      | 0      | 0      | 0      | 0      |
| Actinobacillus      | 2              | 112            | 1      | 1      | 1      | 1      | 0      | 0      | 0      | 0      | 0      | 0      | 1      | 0      | 0      | 0      | 0      | 1      | 0      | 0      |
| Actinomadura        | 1              | 1              | 0      | 0      | 0      | 0      | 0      | 0      | 0      | 0      | 0      | 0      | 0      | 0      | 0      | 0      | 0      | 0      | 0      | 0      |
| Actinoplanes        | 1              | 52             | 1      | 0      | 1      | 1      | 0      | 1      | 0      | 0      | 0      | 0      | 1      | 1      | 1      | 0      | 0      | 1      | 0      | 0      |
| Actinopolyspora     | 1              | 2              | 0      | 0      | 0      | 0      | 0      | 0      | 0      | 0      | 0      | 0      | 0      | 0      | 0      | 0      | 0      | 0      | 0      | 0      |
| Actinosynnema       | 2              | 122            | 1      | 0      | 1      | 1      | 0      | 0      | 0      | 1      | 0      | 0      | 0      | 1      | 1      | 0      | 0      | 1      | 0      | 0      |
| Advenella           | 1              | 30             | 0      | 1      | 0      | 0      | 1      | 1      | 0      | 1      | 0      | 0      | 1      | 1      | 1      | 0      | 0      | 0      | 0      | 0      |
| Aequorivita         | 1              | 12             | 0      | 0      | 1      | 1      | 0      | 0      | 0      | 0      | 0      | 0      | 0      | 0      | 0      | 0      | 0      | 1      | 0      | 0      |
| Aerococcus          | 2              | 57             | 1      | 0      | 1      | 0      | 1      | 0      | 0      | 0      | 0      | 0      | 0      | 0      | 0      | 0      | 0      | 0      | 0      | 1      |
| Aeromonas           | 2              | 127            | 1      | 1      | 1      | 1      | 0      | 0      | 0      | 0      | 0      | 0      | 0      | 0      | 0      | 0      | 0      | 1      | 0      | 0      |
| Aeropyrum           | 1              | 13             | 0      | 0      | 0      | 0      | 1      | 0      | 0      | 0      | 0      | 0      | 0      | 0      | 0      | 0      | 0      | 0      | 0      | 1      |
| Afipia              | 1              | 54             | 0      | 1      | 0      | 0      | 0      | 0      | 0      | 0      | 1      | 0      | 0      | 0      | 0      | 0      | 0      | 0      | 0      | 0      |
| Aggregatibacter     | 1              | 81             | 1      | 1      | 1      | 1      | 0      | 0      | 1      | 0      | 0      | 0      | 0      | 0      | 0      | 0      | 0      | 0      | 0      | 0      |
| Agrobacterium       | 2              | 242            | 1      | 1      | 1      | 1      | 0      | 1      | 0      | 0      | 0      | 0      | 1      | 1      | 1      | 0      | 0      | 1      | 1      | 0      |
| Ahrensia            | 1              | 2              | 0      | 0      | 0      | 0      | 0      | 0      | 0      | 0      | 0      | 0      | 0      | 0      | 0      | 0      | 0      | 0      | 0      | 0      |
| Akkermansia         | 2              | 47             | 1      | 0      | 0      | 0      | 0      | 0      | 0      | 0      | 0      | 0      | 0      | 0      | 0      | 0      | 0      | 1      | 0      | 0      |
| Albidiferax         | 3              | 144            | 0      | 1      | 1      | 0      | 1      | 1      | 0      | 0      | 0      | 0      | 0      | 0      | 1      | 0      | 1      | 0      | 0      | 0      |
| Alcaligenes         | 1              | 21             | 0      | 0      | 0      | 0      | 0      | 0      | 0      | 0      | 0      | 0      | 0      | 0      | 0      | 0      | 0      | 0      | 0      | 0      |
| Alcanivorax         | 2              | 146            | 1      | 1      | 0      | 1      | 0      | 0      | 0      | 0      | 0      | 0      | 1      | 0      | 1      | 1      | 1      | 1      | 0      | 0      |
| Alicyclophilus      | 3              | 152            | 0      | 1      | 0      | 0      | 0      | 1      | 0      | 0      | 0      | 0      | 1      | 1      | 1      | 0      | 0      | 0      | 0      | 0      |
| Alicyclobacillus    | 2              | 91             | 1      | 0      | 1      | 0      | 0      | 0      | 0      | 0      | 0      | 0      | 0      | 0      | 1      | 0      | 0      | 0      | 0      | 0      |
| Aliivibrio          | 2              | 118            | 1      | 1      | 1      | 1      | 0      | 0      | 0      | 0      | 0      | 0      | 0      | 0      | 0      | 0      | 0      | 0      | 0      | 0      |
| Alishewanella       | 1              | 1              | 0      | 0      | 0      | 0      | 0      | 0      | 0      | 0      | 0      | 0      | 0      | 0      | 0      | 0      | 0      | 0      | 0      | 0      |
| Alistipes           | 1              | 52             | 1      | 0      | 1      | 1      | 0      | 0      | 0      | 0      | 0      | 0      | 0      | 0      | 0      | 0      | 0      | 1      | 0      | 0      |
| Alkalilimnicola     | 2              | 97             | 1      | 1      | 0      | 0      | 0      | 0      | 0      | 0      | 0      | 0      | 0      | 0      | 0      | 0      | 0      | 1      | 0      | 0      |
| Alkaliphilus        | 2              | 62             | 1      | 0      | 1      | 1      | 1      | 0      | 1      | 0      | 0      | 0      | 0      | 0      | 0      | 0      | 0      | 1      | 0      | 0      |
| Allochromatium      | 2              | 84             | 1      | 0      | 0      | 0      | 0      | 0      | 0      | 0      | 0      | 0      | 0      | 0      | 0      | 0      | 0      | 0      | 0      | 0      |
| Alphaproteobacteria | 1              | 3              | 0      | 0      | 0      | 0      | 0      | 0      | 0      | 0      | 0      | 0      | 0      | 0      | 0      | 0      | 0      | 0      | 0      | 0      |
| Alteromonadales     | 1              | 12             | 0      | 0      | 0      | 1      | 0      | 0      | 0      | 0      | 0      | 0      | 0      | 0      | 0      | 0      | 0      | 0      | 0      | 0      |
| Alteromonas         | 1              | 37             | 0      | 1      | 1      | 1      | 0      | 0      | 0      | 1      | 0      | 0      | 0      | 1      | 1      | 0      | 0      | 1      | 0      | 0      |
| Aminobacter         | 1              | 4              | 0      | 0      | 0      | 0      | 0      | 0      | 0      | 0      | 0      | 0      | 0      | 0      | 0      | 0      | 0      | 0      | 0      | 0      |
| Aminobacterium      | 2              | 59             | 1      | 0      | 0      | 1      | 0      | 0      | 1      | 0      | 0      | 0      | 0      | 0      | 0      | 0      | 0      | 1      | 0      | 0      |

| Genus            | Cluster Number | Protein Counts | K00760 | K00799 | K00857 | K00876 | K01026 | K01031 | K01034 | K01039 | K01041 | K01045 | K01053 | K01055 | K01061 | K01066 | K01075 | K01077 | K01078 | K01101 |
|------------------|----------------|----------------|--------|--------|--------|--------|--------|--------|--------|--------|--------|--------|--------|--------|--------|--------|--------|--------|--------|--------|
| Ammonifex        | 2              | 50             | 1      | 0      | 0      | 0      | 0      | 0      | 0      | 0      | 0      | 0      | 0      | 0      | 0      | 0      | 0      | 0      | 0      | 0      |
| Amphibacillus    | 1              | 13             | 1      | 0      | 1      | 0      | 0      | 0      | 0      | 0      | 0      | 0      | 0      | 0      | 0      | 0      | 0      | 0      | 0      | 0      |
| Amphritea        | 1              | 2              | 0      | 0      | 0      | 0      | 0      | 0      | 0      | 0      | 0      | 0      | 0      | 0      | 0      | 0      | 0      | 0      | 0      | 0      |
| Amycolatopsis    | 2              | 201            | 1      | 0      | 1      | 0      | 0      | 0      | 0      | 1      | 1      | 0      | 1      | 1      | 1      | 0      | 0      | 1      | 1      | 0      |
| Amycolicoccus    | 1              | 43             | 1      | 0      | 0      | 0      | 0      | 0      | 0      | 0      | 1      | 0      | 0      | 1      | 1      | 0      | 0      | 0      | 0      | 0      |
| Anabaena         | 2              | 92             | 0      | 1      | 0      | 1      | 0      | 0      | 0      | 0      | 0      | 0      | 0      | 0      | 1      | 0      | 0      | 1      | 1      | 0      |
| Anaerobaculum    | 1              | 11             | 1      | 0      | 0      | 1      | 0      | 0      | 0      | 0      | 0      | 0      | 0      | 0      | 0      | 0      | 0      | 0      | 0      | 0      |
| Anaerococcus     | 2              | 46             | 1      | 0      | 1      | 1      | 0      | 0      | 0      | 0      | 0      | 0      | 0      | 0      | 0      | 0      | 0      | 0      | 0      | 0      |
| Anaerolinea      | 2              | 66             | 1      | 0      | 1      | 1      | 0      | 0      | 0      | 1      | 0      | 0      | 0      | 0      | 0      | 0      | 0      | 0      | 0      | 1      |
| Anaeromyxobacter | 3              | 117            | 1      | 1      | 0      | 1      | 0      | 0      | 0      | 0      | 0      | 0      | 0      | 0      | 0      | 0      | 1      | 1      | 0      | 0      |
| Anaerostipes     | 1              | 44             | 0      | 0      | 0      | 1      | 0      | 0      | 0      | 0      | 0      | 0      | 0      | 0      | 0      | 0      | 0      | 0      | 0      | 0      |
| Anaerotruncus    | 1              | 2              | 0      | 0      | 0      | 0      | 0      | 0      | 0      | 0      | 0      | 0      | 0      | 0      | 0      | 0      | 0      | 0      | 0      | 0      |
| Anaplasma        | 1              | 35             | 0      | 1      | 0      | 0      | 0      | 0      | 0      | 0      | 0      | 0      | 0      | 0      | 0      | 0      | 0      | 0      | 0      | 0      |
| Ancylobacter     | 1              | 3              | 0      | 0      | 0      | 0      | 0      | 0      | 0      | 0      | 0      | 0      | 0      | 0      | 0      | 0      | 0      | 0      | 0      | 0      |
| Aneurinibacillus | 1              | 1              | 0      | 0      | 0      | 0      | 0      | 0      | 0      | 0      | 0      | 0      | 0      | 0      | 0      | 0      | 0      | 0      | 0      | 0      |
| Angomonas        | 1              | 1              | 0      | 0      | 0      | 0      | 0      | 0      | 0      | 0      | 0      | 0      | 0      | 0      | 0      | 0      | 0      | 0      | 0      | 0      |
| Anoxybacillus    | 2              | 72             | 1      | 0      | 1      | 1      | 0      | 0      | 0      | 0      | 0      | 0      | 0      | 0      | 0      | 0      | 0      | 0      | 0      | 1      |
| Aquifex          | 2              | 45             | 1      | 0      | 0      | 0      | 0      | 0      | 0      | 0      | 0      | 0      | 0      | 0      | 1      | 0      | 0      | 0      | 0      | 0      |
| Aquimarina       | 1              | 2              | 0      | 0      | 0      | 0      | 0      | 0      | 0      | 0      | 0      | 0      | 0      | 0      | 0      | 0      | 0      | 0      | 0      | 0      |
| Arcanobacterium  | 2              | 45             | 0      | 0      | 1      | 1      | 0      | 0      | 0      | 0      | 0      | 0      | 0      | 0      | 0      | 1      | 0      | 0      | 0      | 0      |
| Archaeoglobus    | 1              | 14             | 1      | 0      | 0      | 0      | 0      | 0      | 0      | 1      | 0      | 0      | 0      | 0      | 0      | 0      | 0      | 0      | 0      | 0      |
| Arcobacter       | 2              | 101            | 0      | 1      | 0      | 0      | 0      | 0      | 1      | 0      | 0      | 0      | 0      | 0      | 0      | 0      | 0      | 0      | 0      | 0      |
| Aromatoleum      | 3              | 133            | 1      | 1      | 0      | 0      | 0      | 0      | 0      | 0      | 0      | 0      | 0      | 0      | 0      | 0      | 0      | 0      | 0      | 0      |
| Arsenophonus     | 1              | 4              | 0      | 0      | 0      | 0      | 0      | 0      | 0      | 0      | 0      | 0      | 0      | 0      | 0      | 0      | 0      | 0      | 0      | 0      |
| Arthrobacter     | 2              | 206            | 1      | 0      | 1      | 1      | 0      | 1      | 0      | 0      | 0      | 0      | 1      | 1      | 1      | 0      | 0      | 1      | 0      | 0      |
| Arthrospira      | 2              | 67             | 0      | 0      | 0      | 1      | 0      | 0      | 0      | 0      | 0      | 0      | 0      | 0      | 1      | 0      | 0      | 0      | 0      | 0      |
| Aster            | 1              | 10             | 0      | 0      | 1      | 1      | 0      | 0      | 0      | 0      | 0      | 0      | 0      | 0      | 0      | 0      | 0      | 0      | 0      | 0      |
| Asticcacaulis    | 2              | 103            | 1      | 1      | 1      | 0      | 0      | 0      | 0      | 0      | 0      | 0      | 1      | 0      | 1      | 0      | 0      | 1      | 0      | 0      |
| Atopobium        | 1              | 28             | 1      | 0      | 0      | 0      | 0      | 0      | 0      | 0      | 0      | 0      | 0      | 0      | 0      | 0      | 0      | 0      | 0      | 0      |
| Aurantimonas     | 1              | 2              | 0      | 0      | 0      | 0      | 0      | 0      | 0      | 0      | 0      | 0      | 0      | 0      | 0      | 0      | 0      | 0      | 0      | 0      |
| Avibacterium     | 1              | 17             | 0      | 0      | 0      | 0      | 0      | 0      | 0      | 0      | 0      | 0      | 0      | 0      | 0      | 0      | 0      | 0      | 0      | 0      |
| Azoarcus         | 3              | 172            | 1      | 1      | 0      | 0      | 1      | 0      | 1      | 0      | 1      | 0      | 1      | 0      | 1      | 0      | 1      | 1      | 0      | 0      |
| Azorhizobium     | 3              | 149            | 1      | 1      | 0      | 0      | 0      | 1      | 0      | 0      | 0      | 0      | 1      | 1      | 1      | 0      | 1      | 1      | 0      | 0      |
| Azorhizophilus   | 1              | 4              | 0      | 0      | 0      | 0      | 0      | 0      | 0      | 0      | 0      | 0      | 0      | 0      | 0      | 0      | 0      | 0      | 0      | 0      |
| Azospira         | 1              | 19             | 1      | 1      | 0      | 0      | 0      | 0      | 0      | 1      | 0      | 0      | 0      | 0      | 1      | 0      | 0      | 0      | 0      | 0      |
| Azospirillum     | 2              | 198            | 0      | 1      | 0      | 0      | 0      | 0      | 1      | 1      | 0      | 0      | 1      | 1      | 1      | 0      | 1      | 1      | 0      | 0      |
| Azotobacter      | 3              | 183            | 1      | 1      | 0      | 0      | 0      | 0      | 0      | 1      | 0      | 0      | 0      | 1      | 1      | 0      | 1      | 1      | 0      | 0      |
| Bacillales       | 1              | 9              | 1      | 0      | 1      | 1      | 0      | 0      | 0      | 0      | 0      | 0      | 0      | 0      | 0      | 0      | 0      | 0      | 0      | 0      |
| Bacilli          | 1              | 3              | 0      | 0      | 0      | 0      | 0      | 0      | 0      | 0      | 0      | 0      | 0      | 0      | 0      | 0      | 0      | 0      | 0      | 0      |
| Bacillus         | 2              | 237            | 1      | 1      | 1      | 1      | 1      | 0      | 1      | 1      | 1      | 0      | 0      | 0      | 1      | 1      | 0      | 1      | 0      | 1      |
| Bacteria         | 2              | 86             | 0      | 1      | 0      | 0      | 0      | 1      | 0      | 0      | 0      | 0      | 0      | 0      | 1      | 0      | 0      | 0      | 0      | 0      |
| Bacteriovorax    | 2              | 98             | 1      | 1      | 1      | 1      | 0      | 0      | 0      | 0      | 0      | 0      | 0      | 0      | 0      | 0      | 0      | 1      | 0      | 0      |
| Bacteroidales    | 2              | 59             | 0      | 0      | 1      | 1      | 0      | 0      | 0      | 0      | 0      | 0      | 0      | 0      | 0      | 0      | 0      | 1      | 0      | 0      |
| Bacteroides      | 2              | 96             | 1      | 0      | 1      | 1      | 0      | 0      | 0      | 0      | 1      | 0      | 0      | 0      | 0      | 0      | 0      | 1      | 0      | 0      |
| Bacteroidetes    | 1              | 2              | 0      | 0      | 0      | 0      | 0      | 0      | 0      | 0      | 0      | 0      | 0      | 0      | 0      | 0      | 0      | 0      | 0      | 0      |
| Bartonella       | 2              | 50             | 0      | 1      | 0      | 0      | 0      | 0      | 0      | 0      | 0      | 0      | 0      | 0      | 0      | 0      | 0      | 0      | 0      | 0      |
| Baumannia        | 2              | 24             | 0      | 0      | 0      | 0      | 0      | 0      | 0      | 0      | 0      | 0      | 0      | 0      | 0      | 0      | 0      | 0      | 0      | 0      |
| Bdellovibrio     | 2              | 87             | 1      | 1      | 1      | 1      | 0      | 0      | 0      | 0      | 0      | 0      | 0      | 1      | 0      | 1      | 0      | 1      | 0      | 0      |
| Beijerinckia     | 3              | 123            | 0      | 1      | 0      | 1      | 0      | 0      | 1      | 0      | 0      | 0      | 1      | 1      | 1      | 0      | 0      | 0      | 0      | 0      |
| Belliella        | 1              | 14             | 1      | 0      | 1      | 1      | 0      | 0      | 0      | 0      | 0      | 0      | 1      | 0      | 1      | 0      | 0      | 0      | 0      | 0      |
| Beutenbergia     | 2              | 82             | 1      | 0      | 1      | 1      | 0      | 0      | 0      | 0      | 0      | 0      | 1      | 0      | 1      | 0      | 0      | 0      | 0      | 0      |
| Bifidobacterium  | 2              | 61             | 1      | 0      | 0      | 0      | 0      | 0      | 0      | 0      | 0      | 0      | 0      | 0      | 0      | 0      | 0      | 1      | 0      | 0      |

| Genus                | Cluster Number | Protein Counts | K00760 | K00799 | K00857 | K00876 | K01026 | K01031 | K01034 | K01039 | K01041 | K01045 | K01053 | K01055 | K01061 | K01066 | K01075 | K01077 | K01078 | K01101 |
|----------------------|----------------|----------------|--------|--------|--------|--------|--------|--------|--------|--------|--------|--------|--------|--------|--------|--------|--------|--------|--------|--------|
| Bizionia             | 1              | 1              | 0      | 0      | 0      | 0      | 0      | 0      | 0      | 0      | 0      | 0      | 0      | 0      | 0      | 0      | 0      | 0      | 0      | 0      |
| Blastococcus         | 1              | 39             | 1      | 0      | 1      | 0      | 0      | 1      | 0      | 0      | 0      | 0      | 0      | 1      | 1      | 0      | 0      | 0      | 0      | 0      |
| Blattabacterium      | 1              | 23             | 0      | 0      | 0      | 0      | 0      | 0      | 0      | 0      | 0      | 0      | 0      | 0      | 0      | 0      | 0      | 0      | 0      | 0      |
| Blautia              | 1              | 22             | 1      | 0      | 0      | 0      | 0      | 0      | 0      | 0      | 0      | 0      | 0      | 0      | 0      | 0      | 0      | 0      | 0      | 0      |
| Bordetella           | 3              | 227            | 0      | 1      | 0      | 0      | 0      | 1      | 0      | 1      | 0      | 0      | 1      | 1      | 1      | 1      | 1      | 0      | 0      | 0      |
| Borrelia             | 1              | 32             | 1      | 0      | 1      | 1      | 0      | 0      | 0      | 0      | 0      | 0      | 0      | 0      | 0      | 0      | 0      | 0      | 0      | 0      |
| Brachybacterium      | 1              | 18             | 1      | 0      | 1      | 1      | 0      | 0      | 0      | 0      | 0      | 0      | 0      | 0      | 1      | 0      | 0      | 0      | 0      | 0      |
| Brachymonas          | 1              | 4              | 0      | 0      | 0      | 0      | 0      | 0      | 0      | 0      | 0      | 0      | 0      | 0      | 0      | 0      | 0      | 0      | 0      | 0      |
| Brachyspira          | 2              | 79             | 1      | 0      | 1      | 0      | 1      | 0      | 0      | 0      | 0      | 0      | 0      | 0      | 0      | 0      | 0      | 1      | 0      | 0      |
| Bradyrhizobiaceae    | 1              | 20             | 0      | 1      | 0      | 0      | 0      | 0      | 0      | 0      | 1      | 0      | 0      | 0      | 0      | 0      | 0      | 0      | 0      | 0      |
| Bradyrhizobium       | 3              | 254            | 0      | 1      | 0      | 1      | 1      | 0      | 1      | 0      | 1      | 0      | 1      | 1      | 1      | 1      | 1      | 1      | 0      | 0      |
| Brenneria            | 1              | 20             | 1      | 0      | 0      | 1      | 0      | 0      | 0      | 0      | 0      | 0      | 0      | 0      | 0      | 0      | 0      | 0      | 0      | 0      |
| Brevibacillus        | 2              | 122            | 1      | 0      | 1      | 1      | 0      | 0      | 1      | 0      | 0      | 0      | 0      | 0      | 0      | 0      | 0      | 1      | 0      | 0      |
| Brevibacterium       | 1              | 4              | 0      | 0      | 0      | 0      | 0      | 0      | 0      | 0      | 0      | 0      | 0      | 0      | 0      | 0      | 0      | 0      | 0      | 0      |
| Brevundimonas        | 2              | 105            | 1      | 1      | 0      | 1      | 0      | 0      | 0      | 0      | 0      | 0      | 0      | 0      | 1      | 0      | 0      | 0      | 0      | 0      |
| Brucella             | 3              | 138            | 1      | 1      | 0      | 0      | 0      | 1      | 0      | 0      | 1      | 0      | 0      | 1      | 0      | 1      | 0      | 1      | 0      | 0      |
| Buchnera             | 1              | 26             | 1      | 0      | 0      | 0      | 0      | 0      | 0      | 0      | 0      | 0      | 0      | 0      | 0      | 0      | 0      | 0      | 0      | 0      |
| Burkholderia         | 3              | 424            | 1      | 1      | 0      | 0      | 1      | 1      | 0      | 1      | 1      | 0      | 1      | 1      | 1      | 1      | 1      | 1      | 1      | 1      |
| Burkholderiaceae     | 3              | 143            | 0      | 1      | 0      | 0      | 1      | 1      | 0      | 0      | 1      | 0      | 1      | 1      | 1      | 1      | 1      | 0      | 0      | 0      |
| Burkholderiales      | 1              | 24             | 0      | 0      | 0      | 0      | 0      | 0      | 0      | 0      | 0      | 0      | 0      | 0      | 1      | 0      | 0      | 0      | 0      | 0      |
| Buttiauxella         | 1              | 2              | 0      | 0      | 0      | 0      | 0      | 0      | 0      | 0      | 0      | 0      | 0      | 0      | 0      | 0      | 0      | 0      | 0      | 0      |
| Butyrivibrio         | 2              | 67             | 1      | 0      | 1      | 1      | 0      | 0      | 0      | 0      | 0      | 0      | 0      | 0      | 0      | 0      | 0      | 0      | 0      | 0      |
| Caldanaerobacter     | 2              | 63             | 1      | 0      | 1      | 1      | 0      | 0      | 1      | 0      | 0      | 0      | 0      | 0      | 0      | 0      | 0      | 0      | 0      | 0      |
| Caldicellulosiruptor | 2              | 75             | 1      | 0      | 0      | 1      | 0      | 0      | 0      | 0      | 0      | 0      | 0      | 0      | 0      | 0      | 0      | 1      | 0      | 0      |
| Caldilinea           | 1              | 23             | 1      | 0      | 1      | 1      | 0      | 0      | 0      | 0      | 0      | 0      | 1      | 0      | 1      | 0      | 0      | 1      | 0      | 0      |
| Caldimonas           | 1              | 6              | 0      | 0      | 0      | 0      | 0      | 0      | 0      | 0      | 0      | 0      | 0      | 0      | 0      | 0      | 0      | 0      | 0      | 0      |
| Caldisericum         | 1              | 10             | 1      | 0      | 1      | 1      | 0      | 0      | 0      | 0      | 0      | 0      | 0      | 0      | 0      | 0      | 0      | 0      | 0      | 0      |
| Caldisphaera         | 1              | 7              | 0      | 0      | 0      | 0      | 0      | 0      | 0      | 1      | 0      | 0      | 0      | 0      | 0      | 0      | 0      | 0      | 0      | 0      |
| Calditerrivibrio     | 2              | 74             | 1      | 0      | 0      | 0      | 0      | 0      | 0      | 0      | 0      | 0      | 0      | 0      | 0      | 0      | 0      | 1      | 0      | 0      |
| Caldivirga           | 1              | 13             | 0      | 0      | 0      | 0      | 0      | 0      | 0      | 0      | 0      | 0      | 0      | 0      | 1      | 0      | 0      | 0      | 0      | 0      |
| Calothrix            | 1              | 43             | 0      | 1      | 0      | 0      | 0      | 0      | 0      | 0      | 0      | 0      | 0      | 0      | 1      | 0      | 0      | 1      | 0      | 0      |
| Calyptogena          | 2              | 34             | 0      | 1      | 0      | 0      | 0      | 0      | 0      | 0      | 0      | 0      | 0      | 0      | 0      | 0      | 0      | 0      | 0      | 0      |
| Campylobacter        | 2              | 80             | 0      | 0      | 1      | 0      | 0      | 0      | 0      | 0      | 0      | 0      | 0      | 0      | 0      | 0      | 0      | 0      | 0      | 0      |
| Candidatus           | 2              | 290            | 1      | 1      | 1      | 1      | 1      | 0      | 0      | 1      | 0      | 0      | 1      | 1      | 1      | 1      | 0      | 0      | 1      | 0      |
| Capnocytophaga       | 1              | 50             | 0      | 0      | 1      | 1      | 0      | 0      | 0      | 0      | 0      | 0      | 0      | 0      | 0      | 0      | 0      | 1      | 0      | 0      |
| Carbophilus          | 1              | 2              | 0      | 0      | 0      | 0      | 0      | 0      | 0      | 0      | 0      | 0      | 0      | 0      | 0      | 0      | 0      | 0      | 0      | 0      |
| Carboxydibrachium    | 1              | 14             | 0      | 0      | 0      | 1      | 0      | 0      | 1      | 0      | 0      | 0      | 0      | 0      | 0      | 0      | 0      | 0      | 0      | 0      |
| Carboxydotherrmus    | 2              | 68             | 1      | 0      | 1      | 0      | 0      | 0      | 0      | 0      | 0      | 0      | 0      | 0      | 0      | 0      | 0      | 0      | 0      | 0      |
| Carica               | 1              | 2              | 0      | 0      | 0      | 0      | 0      | 0      | 0      | 0      | 0      | 0      | 0      | 0      | 0      | 0      | 0      | 0      | 0      | 0      |
| Carnobacterium       | 2              | 71             | 1      | 0      | 1      | 1      | 1      | 0      | 0      | 0      | 0      | 0      | 0      | 0      | 0      | 0      | 0      | 0      | 0      | 1      |
| Catenibacterium      | 1              | 2              | 0      | 0      | 0      | 0      | 0      | 0      | 0      | 0      | 0      | 0      | 0      | 0      | 0      | 0      | 0      | 0      | 0      | 0      |
| Catenovulum          | 1              | 2              | 0      | 0      | 0      | 0      | 0      | 0      | 0      | 0      | 0      | 0      | 0      | 0      | 0      | 0      | 0      | 0      | 0      | 0      |
| Catenulispora        | 3              | 159            | 1      | 0      | 1      | 1      | 0      | 1      | 0      | 1      | 1      | 0      | 0      | 0      | 1      | 0      | 0      | 0      | 1      | 0      |
| Caulobacter          | 3              | 168            | 1      | 1      | 0      | 0      | 0      | 0      | 0      | 0      | 0      | 0      | 1      | 0      | 1      | 0      | 0      | 1      | 1      | 0      |
| Cedecea              | 1              | 45             | 1      | 0      | 0      | 1      | 0      | 0      | 0      | 0      | 0      | 0      | 0      | 0      | 0      | 0      | 0      | 0      | 0      | 0      |
| Cellulomonas         | 2              | 96             | 1      | 0      | 1      | 1      | 0      | 0      | 0      | 0      | 0      | 0      | 0      | 0      | 0      | 0      | 0      | 1      | 0      | 0      |
| Cellulophaga         | 2              | 105            | 0      | 0      | 1      | 1      | 0      | 0      | 0      | 0      | 0      | 0      | 1      | 0      | 1      | 0      | 0      | 1      | 0      | 0      |
| Cellulosilyticum     | 1              | 14             | 1      | 0      | 1      | 1      | 0      | 0      | 0      | 0      | 0      | 0      | 0      | 0      | 0      | 0      | 0      | 1      | 0      | 0      |
| Cellvibrio           | 2              | 85             | 1      | 0      | 0      | 0      | 0      | 0      | 0      | 0      | 0      | 0      | 1      | 0      | 1      | 0      | 0      | 1      | 0      | 0      |
| Cenarchaeum          | 1              | 7              | 0      | 0      | 0      | 0      | 0      | 0      | 0      | 0      | 0      | 0      | 0      | 0      | 0      | 0      | 0      | 0      | 0      | 0      |
| Chamaesiphon         | 1              | 13             | 0      | 1      | 0      | 0      | 0      | 0      | 0      | 0      | 0      | 0      | 0      | 0      | 1      | 0      | 0      | 0      | 0      | 0      |
| Chelativorans        | 3              | 136            | 1      | 1      | 0      | 0      | 0      | 0      | 0      | 1      | 0      | 0      | 1      | 1      | 1      | 0      | 0      | 0      | 0      | 0      |

| Genus                  | Cluster Number | Protein Counts | K00760 | K00799 | K00857 | K00876 | K01026 | K01031 | K01034 | K01039 | K01041 | K01045 | K01053 | K01055 | K01061 | K01066 | K01075 | K01077 | K01078 | K01101 |
|------------------------|----------------|----------------|--------|--------|--------|--------|--------|--------|--------|--------|--------|--------|--------|--------|--------|--------|--------|--------|--------|--------|
| Chelatococcus          | 1              | 2              | 0      | 0      | 0      | 0      | 0      | 0      | 0      | 0      | 0      | 0      | 0      | 0      | 0      | 0      | 0      | 0      | 0      | 0      |
| Chitinophaga           | 2              | 98             | 1      | 0      | 1      | 0      | 0      | 0      | 0      | 0      | 0      | 0      | 1      | 0      | 1      | 0      | 0      | 1      | 0      | 0      |
| Chlamydia              | 1              | 36             | 0      | 0      | 0      | 1      | 0      | 0      | 0      | 0      | 0      | 0      | 0      | 0      | 0      | 0      | 0      | 0      | 0      | 0      |
| Chlamydomonas          | 1              | 3              | 0      | 0      | 0      | 0      | 0      | 0      | 0      | 0      | 0      | 0      | 0      | 0      | 0      | 0      | 0      | 0      | 0      | 0      |
| Chlamydomphila         | 1              | 31             | 0      | 0      | 0      | 1      | 0      | 0      | 0      | 0      | 0      | 0      | 0      | 0      | 0      | 0      | 0      | 0      | 0      | 0      |
| Chlorobaculum          | 2              | 61             | 1      | 0      | 0      | 1      | 0      | 0      | 0      | 0      | 0      | 0      | 0      | 0      | 0      | 0      | 0      | 0      | 0      | 0      |
| Chlorobium             | 2              | 89             | 1      | 0      | 0      | 1      | 0      | 0      | 0      | 0      | 0      | 0      | 0      | 0      | 0      | 0      | 0      | 1      | 1      | 0      |
| Chlorobium/Pelodictyon | 1              | 2              | 0      | 0      | 0      | 0      | 0      | 0      | 0      | 0      | 0      | 0      | 0      | 0      | 0      | 0      | 0      | 0      | 0      | 0      |
| Chloroflexus           | 2              | 105            | 1      | 0      | 1      | 1      | 0      | 0      | 0      | 0      | 0      | 0      | 0      | 0      | 1      | 0      | 0      | 1      | 0      | 1      |
| Chlorogloeopsis        | 1              | 9              | 0      | 0      | 0      | 0      | 0      | 0      | 0      | 0      | 0      | 0      | 0      | 0      | 0      | 0      | 0      | 0      | 0      | 0      |
| Chloroherpeton         | 2              | 59             | 1      | 0      | 1      | 0      | 0      | 0      | 0      | 0      | 0      | 0      | 0      | 0      | 0      | 0      | 0      | 1      | 0      | 0      |
| Chromobacterium        | 2              | 117            | 1      | 1      | 1      | 1      | 0      | 0      | 0      | 0      | 0      | 0      | 0      | 1      | 1      | 1      | 0      | 1      | 1      | 0      |
| Chromohalobacter       | 2              | 145            | 1      | 1      | 0      | 0      | 0      | 0      | 0      | 1      | 0      | 0      | 1      | 0      | 1      | 0      | 1      | 0      | 0      | 0      |
| Chroococciopsis        | 1              | 24             | 1      | 1      | 0      | 0      | 0      | 0      | 0      | 0      | 0      | 0      | 1      | 0      | 1      | 0      | 0      | 1      | 0      | 0      |
| Chryseobacterium       | 2              | 104            | 0      | 1      | 0      | 0      | 0      | 0      | 0      | 0      | 0      | 0      | 1      | 1      | 1      | 0      | 0      | 0      | 0      | 0      |
| Citricella             | 1              | 13             | 0      | 0      | 0      | 0      | 0      | 0      | 0      | 0      | 0      | 0      | 0      | 0      | 0      | 0      | 0      | 0      | 0      | 0      |
| Citrobacter            | 2              | 190            | 1      | 1      | 1      | 1      | 0      | 1      | 1      | 0      | 0      | 0      | 0      | 1      | 1      | 1      | 0      | 1      | 0      | 0      |
| Clavibacter            | 2              | 83             | 1      | 0      | 1      | 0      | 0      | 0      | 0      | 0      | 0      | 0      | 0      | 0      | 1      | 0      | 0      | 0      | 0      | 0      |
| Clonorchis             | 1              | 1              | 0      | 0      | 0      | 0      | 0      | 0      | 0      | 0      | 0      | 0      | 0      | 0      | 0      | 0      | 0      | 0      | 0      | 0      |
| Clostridiales          | 2              | 77             | 1      | 0      | 1      | 1      | 1      | 0      | 0      | 0      | 0      | 0      | 0      | 0      | 0      | 0      | 0      | 0      | 0      | 0      |
| Clostridium            | 2              | 191            | 1      | 0      | 1      | 1      | 1      | 0      | 1      | 1      | 0      | 0      | 0      | 0      | 0      | 1      | 0      | 1      | 0      | 0      |
| Cohnella               | 1              | 2              | 0      | 0      | 0      | 0      | 0      | 0      | 0      | 0      | 0      | 0      | 0      | 0      | 0      | 0      | 0      | 0      | 0      | 0      |
| Coleofasciculus        | 1              | 4              | 0      | 0      | 0      | 0      | 0      | 0      | 0      | 0      | 0      | 0      | 0      | 0      | 0      | 0      | 0      | 0      | 0      | 0      |
| Collimonas             | 1              | 35             | 0      | 1      | 0      | 0      | 0      | 1      | 0      | 0      | 0      | 0      | 0      | 1      | 1      | 0      | 0      | 1      | 0      | 0      |
| Colwellia              | 2              | 130            | 1      | 1      | 1      | 1      | 0      | 1      | 0      | 0      | 0      | 0      | 0      | 0      | 1      | 0      | 0      | 1      | 0      | 0      |
| Comamonas              | 2              | 196            | 0      | 1      | 0      | 0      | 0      | 1      | 0      | 1      | 0      | 0      | 0      | 0      | 1      | 0      | 1      | 0      | 0      | 0      |
| Conexibacter           | 3              | 117            | 1      | 1      | 0      | 0      | 0      | 1      | 0      | 0      | 1      | 0      | 1      | 0      | 0      | 0      | 0      | 1      | 0      | 0      |
| Coprobacillus          | 1              | 2              | 0      | 0      | 0      | 0      | 0      | 0      | 0      | 0      | 0      | 0      | 0      | 0      | 0      | 0      | 0      | 0      | 0      | 0      |
| Coprococcus            | 2              | 76             | 1      | 0      | 0      | 1      | 1      | 0      | 1      | 0      | 0      | 0      | 0      | 0      | 0      | 0      | 0      | 0      | 0      | 0      |
| Coprothermobacter      | 2              | 45             | 1      | 0      | 1      | 1      | 0      | 0      | 0      | 0      | 0      | 0      | 0      | 0      | 0      | 0      | 0      | 0      | 0      | 0      |
| Coralimargarita        | 2              | 68             | 1      | 0      | 0      | 0      | 0      | 0      | 0      | 0      | 0      | 0      | 0      | 0      | 0      | 0      | 0      | 1      | 0      | 0      |
| Corallococcus          | 1              | 29             | 1      | 1      | 1      | 1      | 0      | 0      | 0      | 1      | 0      | 0      | 0      | 0      | 1      | 0      | 0      | 0      | 0      | 0      |
| Coriobacterium         | 2              | 36             | 1      | 0      | 0      | 0      | 0      | 0      | 0      | 0      | 0      | 0      | 0      | 0      | 0      | 0      | 0      | 0      | 0      | 0      |
| Corynebacterineae      | 1              | 5              | 0      | 0      | 0      | 0      | 0      | 0      | 0      | 0      | 0      | 0      | 0      | 0      | 0      | 0      | 0      | 0      | 0      | 0      |
| Corynebacterium        | 2              | 175            | 1      | 0      | 1      | 0      | 0      | 0      | 0      | 0      | 1      | 0      | 0      | 1      | 0      | 1      | 0      | 1      | 1      | 0      |
| Coxiella               | 2              | 54             | 1      | 0      | 1      | 1      | 0      | 0      | 0      | 0      | 0      | 0      | 0      | 0      | 0      | 0      | 0      | 0      | 0      | 0      |
| Crinalium              | 1              | 21             | 0      | 1      | 0      | 0      | 0      | 0      | 0      | 0      | 0      | 0      | 1      | 0      | 1      | 0      | 0      | 0      | 0      | 0      |
| Croceibacter           | 2              | 80             | 0      | 0      | 1      | 1      | 0      | 0      | 0      | 0      | 0      | 0      | 0      | 0      | 0      | 0      | 0      | 0      | 0      | 0      |
| Crocospaera            | 1              | 6              | 0      | 1      | 0      | 0      | 0      | 0      | 0      | 0      | 0      | 0      | 0      | 0      | 0      | 0      | 0      | 0      | 0      | 0      |
| Cronobacter            | 2              | 120            | 1      | 1      | 1      | 1      | 0      | 0      | 0      | 0      | 0      | 0      | 0      | 0      | 1      | 0      | 0      | 0      | 0      | 0      |
| Cryptobacterium        | 2              | 39             | 1      | 0      | 0      | 0      | 0      | 0      | 0      | 0      | 0      | 0      | 0      | 0      | 0      | 0      | 0      | 0      | 0      | 0      |
| Cucumis                | 1              | 9              | 1      | 0      | 0      | 1      | 0      | 0      | 0      | 0      | 0      | 0      | 0      | 0      | 0      | 0      | 0      | 0      | 0      | 0      |
| Cupriavidus            | 3              | 317            | 1      | 1      | 0      | 0      | 1      | 1      | 0      | 1      | 1      | 0      | 1      | 1      | 1      | 1      | 1      | 1      | 0      | 0      |
| Curtobacterium         | 1              | 5              | 0      | 0      | 0      | 0      | 0      | 0      | 0      | 0      | 0      | 0      | 0      | 0      | 0      | 0      | 0      | 0      | 0      | 0      |
| Curvibacter            | 1              | 27             | 0      | 0      | 0      | 0      | 0      | 0      | 0      | 0      | 0      | 0      | 0      | 0      | 0      | 0      | 0      | 0      | 0      | 0      |
| Cyanobacterium         | 1              | 9              | 0      | 1      | 0      | 0      | 0      | 0      | 0      | 0      | 0      | 0      | 0      | 0      | 1      | 0      | 0      | 0      | 0      | 0      |
| Cyanobium              | 1              | 10             | 0      | 1      | 0      | 0      | 0      | 0      | 0      | 0      | 0      | 0      | 0      | 0      | 1      | 0      | 0      | 0      | 0      | 0      |
| Cyanothece             | 1              | 34             | 0      | 1      | 0      | 1      | 0      | 0      | 0      | 0      | 0      | 0      | 1      | 0      | 1      | 0      | 0      | 1      | 0      | 0      |
| Cyclobacterium         | 1              | 19             | 1      | 0      | 1      | 1      | 0      | 0      | 0      | 0      | 0      | 0      | 1      | 0      | 1      | 0      | 0      | 1      | 0      | 0      |
| Cycloclasticus         | 1              | 21             | 1      | 1      | 0      | 0      | 0      | 0      | 0      | 0      | 0      | 0      | 0      | 0      | 0      | 0      | 0      | 0      | 0      | 0      |
| Cylindrospermopsis     | 1              | 4              | 0      | 0      | 0      | 0      | 0      | 0      | 0      | 0      | 0      | 0      | 0      | 0      | 0      | 0      | 0      | 0      | 0      | 0      |
| Cylindrospermum        | 1              | 30             | 0      | 1      | 0      | 0      | 0      | 0      | 0      | 0      | 0      | 0      | 0      | 0      | 1      | 0      | 0      | 1      | 0      | 0      |

| Genus              | Cluster Number | Protein Counts | K00760 | K00799 | K00857 | K00876 | K01026 | K01031 | K01034 | K01039 | K01041 | K01045 | K01053 | K01055 | K01061 | K01066 | K01075 | K01077 | K01078 | K01101 |
|--------------------|----------------|----------------|--------|--------|--------|--------|--------|--------|--------|--------|--------|--------|--------|--------|--------|--------|--------|--------|--------|--------|
| Cytophaga          | 2              | 69             | 0      | 0      | 0      | 1      | 0      | 0      | 0      | 0      | 0      | 0      | 1      | 0      | 1      | 1      | 0      | 0      | 0      | 0      |
| Dactylococcopsis   | 1              | 8              | 0      | 1      | 0      | 0      | 0      | 0      | 0      | 0      | 0      | 0      | 0      | 0      | 1      | 0      | 0      | 0      | 0      | 0      |
| Dechloromonas      | 1              | 40             | 1      | 1      | 0      | 0      | 1      | 0      | 0      | 0      | 0      | 0      | 0      | 0      | 1      | 0      | 0      | 1      | 0      | 0      |
| Dechlorosoma       | 1              | 19             | 1      | 1      | 0      | 0      | 0      | 0      | 0      | 1      | 0      | 0      | 0      | 0      | 1      | 0      | 0      | 0      | 0      | 0      |
| Deferribacter      | 2              | 73             | 1      | 0      | 0      | 0      | 0      | 0      | 0      | 0      | 0      | 0      | 0      | 0      | 0      | 0      | 0      | 0      | 0      | 0      |
| Dehalobacter       | 1              | 9              | 1      | 0      | 0      | 1      | 0      | 0      | 0      | 0      | 0      | 0      | 0      | 0      | 0      | 0      | 0      | 0      | 0      | 0      |
| Dehalococcoides    | 2              | 41             | 1      | 0      | 0      | 0      | 0      | 0      | 0      | 0      | 0      | 0      | 0      | 0      | 0      | 0      | 0      | 0      | 0      | 0      |
| Dehalogenimonas    | 1              | 37             | 1      | 0      | 0      | 0      | 0      | 0      | 0      | 0      | 0      | 0      | 0      | 0      | 0      | 0      | 0      | 1      | 0      | 0      |
| Deinococcus        | 2              | 140            | 1      | 0      | 1      | 1      | 0      | 1      | 0      | 0      | 0      | 0      | 1      | 0      | 0      | 0      | 0      | 1      | 0      | 0      |
| Delftia            | 3              | 177            | 0      | 1      | 0      | 0      | 0      | 1      | 0      | 0      | 0      | 0      | 1      | 1      | 1      | 0      | 0      | 1      | 0      | 0      |
| Denitrovibrio      | 2              | 67             | 1      | 0      | 0      | 0      | 0      | 0      | 0      | 0      | 0      | 0      | 0      | 0      | 0      | 0      | 0      | 1      | 0      | 0      |
| Desulfarculus      | 2              | 92             | 1      | 0      | 0      | 0      | 0      | 0      | 0      | 0      | 0      | 0      | 0      | 0      | 0      | 0      | 0      | 1      | 0      | 0      |
| Desulfatibacillum  | 3              | 84             | 1      | 0      | 0      | 0      | 0      | 0      | 0      | 1      | 0      | 0      | 0      | 0      | 0      | 0      | 0      | 0      | 0      | 0      |
| Desulfitobacterium | 2              | 102            | 1      | 0      | 1      | 1      | 0      | 0      | 0      | 1      | 0      | 0      | 0      | 0      | 0      | 0      | 0      | 1      | 0      | 0      |
| Desulfobacca       | 2              | 65             | 1      | 0      | 0      | 0      | 0      | 0      | 0      | 0      | 0      | 0      | 0      | 0      | 0      | 0      | 0      | 1      | 0      | 0      |
| Desulfobacterium   | 2              | 113            | 1      | 0      | 0      | 0      | 0      | 0      | 0      | 1      | 0      | 0      | 0      | 0      | 1      | 0      | 0      | 1      | 0      | 0      |
| Desulfobacula      | 1              | 21             | 1      | 0      | 0      | 0      | 0      | 0      | 0      | 1      | 0      | 0      | 0      | 0      | 0      | 0      | 0      | 0      | 0      | 0      |
| Desulfobulbus      | 2              | 88             | 1      | 0      | 0      | 0      | 0      | 0      | 0      | 1      | 0      | 0      | 0      | 0      | 0      | 0      | 0      | 1      | 0      | 0      |
| Desulfocapsa       | 1              | 9              | 1      | 0      | 0      | 0      | 0      | 0      | 0      | 0      | 0      | 0      | 0      | 0      | 1      | 0      | 0      | 0      | 0      | 0      |
| Desulfococcus      | 2              | 80             | 1      | 0      | 0      | 0      | 0      | 0      | 0      | 0      | 0      | 0      | 0      | 0      | 0      | 0      | 0      | 0      | 0      | 0      |
| Desulfohalobium    | 2              | 52             | 1      | 0      | 0      | 0      | 0      | 0      | 0      | 0      | 0      | 0      | 0      | 1      | 0      | 0      | 0      | 1      | 0      | 0      |
| Desulfomicrobium   | 2              | 65             | 1      | 0      | 0      | 0      | 0      | 0      | 0      | 0      | 0      | 0      | 0      | 0      | 0      | 0      | 0      | 0      | 0      | 0      |
| Desulfomonile      | 1              | 25             | 1      | 0      | 0      | 0      | 0      | 0      | 0      | 1      | 0      | 0      | 0      | 0      | 1      | 0      | 0      | 1      | 0      | 0      |
| Desulforhabdus     | 1              | 2              | 0      | 0      | 0      | 0      | 0      | 0      | 0      | 0      | 0      | 0      | 0      | 0      | 0      | 0      | 0      | 0      | 0      | 0      |
| Desulfosporosinus  | 1              | 30             | 1      | 0      | 1      | 1      | 1      | 0      | 1      | 1      | 0      | 0      | 0      | 0      | 1      | 0      | 0      | 1      | 0      | 0      |
| Desulfotalea       | 2              | 66             | 1      | 0      | 0      | 0      | 0      | 0      | 0      | 0      | 0      | 0      | 0      | 0      | 0      | 0      | 0      | 0      | 0      | 0      |
| Desulfotomaculum   | 2              | 98             | 1      | 0      | 0      | 1      | 1      | 0      | 0      | 1      | 1      | 0      | 0      | 1      | 0      | 0      | 0      | 1      | 0      | 0      |
| Desulfovibrio      | 2              | 144            | 1      | 0      | 0      | 0      | 0      | 0      | 0      | 0      | 0      | 0      | 0      | 0      | 0      | 1      | 0      | 1      | 0      | 0      |
| Desulfurispirillum | 2              | 78             | 1      | 1      | 0      | 0      | 0      | 0      | 0      | 0      | 0      | 0      | 0      | 0      | 0      | 0      | 0      | 0      | 0      | 0      |
| Desulfurivibrio    | 2              | 71             | 1      | 0      | 0      | 0      | 0      | 0      | 0      | 0      | 0      | 0      | 0      | 0      | 0      | 0      | 0      | 0      | 0      | 0      |
| Desulfurobacterium | 2              | 53             | 1      | 0      | 0      | 0      | 0      | 0      | 0      | 0      | 0      | 0      | 0      | 0      | 0      | 0      | 0      | 0      | 0      | 1      |
| Desulfurococcus    | 1              | 11             | 0      | 0      | 0      | 0      | 0      | 0      | 0      | 0      | 0      | 0      | 0      | 0      | 0      | 0      | 0      | 0      | 0      | 0      |
| Diaphorobacter     | 1              | 16             | 0      | 0      | 0      | 0      | 0      | 0      | 0      | 0      | 0      | 0      | 0      | 0      | 0      | 0      | 0      | 0      | 0      | 0      |
| Dichelobacter      | 2              | 45             | 1      | 1      | 0      | 0      | 0      | 0      | 0      | 0      | 0      | 0      | 0      | 0      | 0      | 0      | 0      | 1      | 0      | 0      |
| Dickeya            | 2              | 155            | 1      | 1      | 1      | 1      | 0      | 0      | 1      | 0      | 0      | 0      | 0      | 0      | 1      | 0      | 0      | 1      | 0      | 0      |
| Dictyoglomus       | 2              | 62             | 1      | 0      | 1      | 1      | 0      | 0      | 0      | 0      | 0      | 0      | 0      | 0      | 0      | 0      | 0      | 1      | 0      | 1      |
| Dinoroseobacter    | 3              | 148            | 1      | 1      | 1      | 0      | 1      | 0      | 0      | 0      | 0      | 0      | 0      | 1      | 0      | 0      | 0      | 0      | 0      | 0      |
| Dokdonia           | 1              | 3              | 0      | 0      | 0      | 0      | 0      | 0      | 0      | 0      | 0      | 0      | 0      | 0      | 0      | 0      | 0      | 0      | 0      | 0      |
| Dorea              | 1              | 7              | 0      | 0      | 0      | 0      | 0      | 0      | 0      | 0      | 0      | 0      | 0      | 0      | 0      | 0      | 0      | 0      | 0      | 0      |
| Dyadobacter        | 2              | 83             | 1      | 0      | 1      | 1      | 0      | 0      | 0      | 0      | 0      | 0      | 1      | 0      | 1      | 0      | 0      | 1      | 0      | 0      |
| Echinicola         | 1              | 20             | 1      | 0      | 1      | 1      | 0      | 0      | 0      | 0      | 0      | 0      | 1      | 1      | 1      | 0      | 0      | 1      | 0      | 0      |
| Edwardsiella       | 2              | 126            | 1      | 1      | 1      | 1      | 0      | 0      | 1      | 0      | 0      | 0      | 0      | 0      | 0      | 1      | 0      | 1      | 0      | 0      |
| Eggerthella        | 1              | 51             | 1      | 0      | 0      | 0      | 0      | 0      | 0      | 0      | 0      | 0      | 0      | 0      | 0      | 1      | 0      | 0      | 0      | 0      |
| Ehrlichia          | 2              | 37             | 0      | 1      | 0      | 0      | 0      | 0      | 0      | 0      | 0      | 0      | 0      | 0      | 0      | 0      | 0      | 0      | 0      | 0      |
| Eikenella          | 1              | 4              | 0      | 0      | 0      | 0      | 0      | 0      | 0      | 0      | 0      | 0      | 0      | 0      | 0      | 0      | 0      | 0      | 0      | 0      |
| Elusimicrobium     | 2              | 44             | 1      | 0      | 1      | 0      | 0      | 0      | 0      | 0      | 0      | 0      | 0      | 0      | 0      | 0      | 0      | 1      | 0      | 0      |
| Emticicia          | 1              | 21             | 1      | 0      | 1      | 1      | 0      | 0      | 0      | 0      | 0      | 0      | 1      | 0      | 1      | 0      | 0      | 0      | 0      | 0      |
| Enhydrobacter      | 1              | 1              | 0      | 0      | 0      | 0      | 0      | 0      | 0      | 0      | 0      | 0      | 0      | 0      | 0      | 0      | 0      | 0      | 0      | 0      |
| Ensifer            | 1              | 2              | 0      | 0      | 0      | 0      | 0      | 0      | 0      | 0      | 0      | 0      | 0      | 0      | 0      | 0      | 0      | 0      | 0      | 0      |
| Enterobacter       | 2              | 202            | 1      | 1      | 1      | 1      | 0      | 1      | 0      | 0      | 0      | 0      | 1      | 1      | 1      | 0      | 0      | 1      | 0      | 0      |
| Enterobacteriaceae | 2              | 211            | 1      | 1      | 1      | 1      | 0      | 1      | 1      | 0      | 0      | 0      | 1      | 1      | 1      | 1      | 0      | 1      | 0      | 0      |
| Enterococcus       | 1              | 187            | 1      | 1      | 1      | 1      | 0      | 1      | 0      | 0      | 0      | 0      | 1      | 1      | 1      | 0      | 0      | 1      | 0      | 0      |

| Genus               | Cluster Number | Protein Counts | K00760 | K00799 | K00857 | K00876 | K01026 | K01031 | K01034 | K01039 | K01041 | K01045 | K01053 | K01055 | K01061 | K01066 | K01075 | K01077 | K01078 | K01101 |
|---------------------|----------------|----------------|--------|--------|--------|--------|--------|--------|--------|--------|--------|--------|--------|--------|--------|--------|--------|--------|--------|--------|
| Enterovibrio        | 1              | 15             | 0      | 0      | 0      | 0      | 0      | 0      | 0      | 0      | 0      | 0      | 0      | 0      | 0      | 0      | 0      | 0      | 0      | 0      |
| Erwinia             | 2              | 151            | 1      | 1      | 1      | 1      | 0      | 0      | 0      | 0      | 0      | 0      | 1      | 0      | 1      | 0      | 0      | 1      | 0      | 0      |
| Erysipelothrix      | 1              | 9              | 1      | 0      | 1      | 1      | 0      | 0      | 0      | 0      | 0      | 0      | 0      | 0      | 0      | 0      | 0      | 0      | 0      | 0      |
| Erysipelotrichaceae | 1              | 4              | 0      | 0      | 0      | 0      | 0      | 0      | 0      | 0      | 0      | 0      | 0      | 0      | 0      | 0      | 0      | 0      | 0      | 0      |
| Erythrobacter       | 2              | 80             | 0      | 1      | 1      | 0      | 0      | 0      | 0      | 0      | 0      | 0      | 0      | 0      | 1      | 0      | 0      | 1      | 0      | 0      |
| Escherichia         | 2              | 242            | 1      | 1      | 1      | 1      | 0      | 1      | 1      | 0      | 1      | 0      | 0      | 1      | 1      | 1      | 0      | 1      | 0      | 0      |
| Ethanoligenens      | 2              | 69             | 1      | 0      | 0      | 1      | 0      | 0      | 0      | 0      | 0      | 0      | 0      | 0      | 0      | 0      | 0      | 0      | 0      | 0      |
| Eubacteriaceae      | 1              | 2              | 0      | 0      | 0      | 0      | 0      | 0      | 0      | 0      | 0      | 0      | 0      | 0      | 0      | 0      | 0      | 0      | 0      | 0      |
| Eubacterium         | 2              | 103            | 1      | 0      | 0      | 1      | 1      | 0      | 0      | 0      | 0      | 0      | 1      | 0      | 0      | 0      | 0      | 0      | 0      | 0      |
| Eudoraea            | 1              | 4              | 0      | 0      | 0      | 0      | 0      | 0      | 0      | 0      | 0      | 0      | 0      | 0      | 0      | 0      | 0      | 0      | 0      | 0      |
| Euryarchaeota       | 1              | 1              | 0      | 0      | 0      | 0      | 0      | 0      | 0      | 0      | 0      | 0      | 0      | 0      | 0      | 0      | 0      | 0      | 0      | 0      |
| Exiguobacterium     | 2              | 93             | 1      | 0      | 1      | 1      | 0      | 0      | 0      | 0      | 0      | 0      | 0      | 0      | 0      | 0      | 0      | 1      | 0      | 1      |
| Faecalibacterium    | 1              | 12             | 1      | 0      | 1      | 1      | 0      | 0      | 0      | 0      | 0      | 0      | 0      | 0      | 0      | 0      | 0      | 1      | 0      | 0      |
| Ferrimonas          | 2              | 115            | 1      | 1      | 1      | 1      | 0      | 0      | 0      | 0      | 0      | 0      | 0      | 0      | 0      | 0      | 0      | 1      | 0      | 0      |
| Ferroglobus         | 1              | 14             | 0      | 0      | 0      | 0      | 0      | 0      | 0      | 1      | 0      | 0      | 0      | 0      | 0      | 0      | 0      | 0      | 0      | 1      |
| Ferroplasma         | 1              | 11             | 0      | 0      | 1      | 0      | 0      | 0      | 0      | 0      | 0      | 0      | 0      | 0      | 0      | 0      | 0      | 0      | 0      | 0      |
| Fervidicoccus       | 1              | 7              | 0      | 0      | 0      | 0      | 0      | 0      | 0      | 0      | 0      | 0      | 0      | 0      | 0      | 0      | 0      | 0      | 0      | 0      |
| Fervidobacterium    | 2              | 54             | 1      | 0      | 1      | 1      | 0      | 0      | 1      | 0      | 0      | 0      | 0      | 0      | 0      | 0      | 0      | 1      | 0      | 0      |
| Fibrella            | 1              | 17             | 1      | 0      | 1      | 1      | 0      | 0      | 0      | 0      | 0      | 0      | 1      | 0      | 1      | 0      | 0      | 1      | 0      | 0      |
| Fibrobacter         | 2              | 52             | 1      | 0      | 0      | 0      | 0      | 0      | 0      | 0      | 0      | 0      | 0      | 0      | 0      | 0      | 0      | 0      | 0      | 0      |
| Filifactor          | 1              | 9              | 1      | 0      | 1      | 1      | 0      | 0      | 0      | 1      | 0      | 0      | 0      | 0      | 0      | 0      | 0      | 0      | 0      | 0      |
| Finegoldia          | 2              | 55             | 1      | 1      | 1      | 1      | 0      | 0      | 0      | 0      | 0      | 0      | 0      | 0      | 0      | 0      | 0      | 0      | 0      | 0      |
| Firmicutes          | 1              | 15             | 1      | 0      | 1      | 1      | 0      | 0      | 0      | 0      | 0      | 0      | 0      | 0      | 0      | 0      | 0      | 0      | 0      | 0      |
| Fischerella         | 1              | 15             | 0      | 0      | 0      | 0      | 0      | 0      | 0      | 0      | 0      | 0      | 0      | 0      | 0      | 0      | 0      | 0      | 0      | 0      |
| Flavobacteria       | 1              | 7              | 0      | 0      | 0      | 0      | 0      | 0      | 0      | 0      | 0      | 0      | 0      | 0      | 0      | 0      | 0      | 0      | 0      | 0      |
| Flavobacteriaceae   | 2              | 69             | 1      | 0      | 1      | 1      | 0      | 0      | 0      | 0      | 0      | 0      | 0      | 0      | 0      | 0      | 0      | 0      | 0      | 0      |
| Flavobacteriales    | 1              | 3              | 0      | 0      | 0      | 0      | 0      | 0      | 0      | 0      | 0      | 0      | 0      | 0      | 0      | 0      | 0      | 0      | 0      | 0      |
| Flavobacterium      | 2              | 103            | 1      | 0      | 1      | 1      | 0      | 0      | 0      | 0      | 0      | 0      | 0      | 0      | 1      | 0      | 1      | 1      | 0      | 0      |
| Flexibacter         | 1              | 17             | 1      | 0      | 1      | 1      | 0      | 0      | 0      | 0      | 0      | 0      | 0      | 0      | 1      | 0      | 0      | 0      | 0      | 0      |
| Flexistipes         | 1              | 11             | 1      | 0      | 0      | 0      | 0      | 0      | 0      | 0      | 0      | 0      | 0      | 0      | 0      | 0      | 0      | 0      | 0      | 0      |
| Fluoribacter        | 1              | 6              | 0      | 0      | 0      | 0      | 0      | 0      | 0      | 0      | 0      | 0      | 0      | 0      | 0      | 0      | 0      | 0      | 0      | 0      |
| Fluviicola          | 2              | 69             | 1      | 0      | 1      | 1      | 0      | 0      | 0      | 0      | 0      | 0      | 0      | 0      | 0      | 0      | 0      | 0      | 0      | 0      |
| Formosa             | 1              | 2              | 0      | 0      | 0      | 0      | 0      | 0      | 0      | 0      | 0      | 0      | 0      | 0      | 0      | 0      | 0      | 0      | 0      | 0      |
| Francisella         | 2              | 88             | 1      | 0      | 1      | 1      | 0      | 0      | 0      | 0      | 0      | 0      | 0      | 0      | 0      | 1      | 0      | 0      | 1      | 0      |
| Frankia             | 3              | 202            | 1      | 0      | 0      | 1      | 0      | 0      | 0      | 0      | 1      | 0      | 1      | 1      | 1      | 0      | 0      | 0      | 1      | 0      |
| Frateuria           | 1              | 25             | 1      | 1      | 1      | 0      | 0      | 0      | 0      | 0      | 0      | 0      | 1      | 0      | 1      | 0      | 0      | 0      | 0      | 0      |
| Fructobacillus      | 1              | 2              | 0      | 0      | 0      | 0      | 0      | 0      | 0      | 0      | 0      | 0      | 0      | 0      | 0      | 0      | 0      | 0      | 0      | 0      |
| Fulvimarina         | 1              | 2              | 0      | 0      | 0      | 0      | 0      | 0      | 0      | 0      | 0      | 0      | 0      | 0      | 0      | 0      | 0      | 0      | 0      | 0      |
| Fusobacterium       | 1              | 48             | 1      | 0      | 0      | 0      | 1      | 0      | 0      | 1      | 0      | 0      | 0      | 0      | 0      | 0      | 0      | 0      | 0      | 1      |
| Gallibacterium      | 2              | 87             | 1      | 0      | 1      | 1      | 0      | 0      | 0      | 0      | 0      | 0      | 0      | 0      | 0      | 0      | 0      | 1      | 0      | 0      |
| Gallionella         | 2              | 67             | 1      | 1      | 0      | 0      | 0      | 0      | 0      | 0      | 0      | 0      | 0      | 0      | 0      | 0      | 0      | 0      | 0      | 0      |
| Gammaproteobacteria | 1              | 9              | 0      | 1      | 0      | 0      | 0      | 0      | 0      | 0      | 0      | 0      | 0      | 0      | 0      | 0      | 0      | 0      | 0      | 0      |
| Gardnerella         | 1              | 31             | 1      | 0      | 0      | 0      | 0      | 0      | 0      | 0      | 0      | 0      | 0      | 0      | 0      | 0      | 0      | 0      | 0      | 0      |
| Geitlerinema        | 1              | 9              | 0      | 1      | 0      | 0      | 0      | 0      | 0      | 0      | 0      | 0      | 0      | 0      | 1      | 0      | 0      | 0      | 0      | 0      |
| Gemmatimonas        | 2              | 93             | 1      | 0      | 1      | 1      | 0      | 0      | 0      | 0      | 0      | 0      | 0      | 0      | 1      | 0      | 1      | 0      | 0      | 0      |
| Geobacillus         | 2              | 168            | 1      | 0      | 1      | 1      | 0      | 0      | 0      | 0      | 1      | 0      | 0      | 0      | 0      | 0      | 0      | 1      | 0      | 1      |
| Geobacter           | 2              | 150            | 1      | 0      | 0      | 0      | 0      | 0      | 0      | 1      | 0      | 0      | 0      | 0      | 0      | 0      | 0      | 1      | 0      | 0      |
| Geodermatophilus    | 2              | 136            | 1      | 0      | 1      | 0      | 1      | 1      | 0      | 0      | 0      | 0      | 0      | 1      | 1      | 0      | 0      | 0      | 0      | 0      |
| Geopsychrobacter    | 1              | 2              | 0      | 0      | 0      | 0      | 0      | 0      | 0      | 0      | 0      | 0      | 0      | 0      | 0      | 0      | 0      | 0      | 0      | 0      |
| Gillisia            | 1              | 11             | 0      | 0      | 1      | 0      | 0      | 0      | 0      | 0      | 0      | 0      | 0      | 0      | 0      | 0      | 0      | 0      | 0      | 0      |
| Gilvimarinus        | 1              | 4              | 0      | 0      | 0      | 0      | 0      | 0      | 0      | 0      | 0      | 0      | 0      | 0      | 0      | 0      | 0      | 0      | 0      | 0      |
| Glaciecola          | 2              | 117            | 0      | 1      | 1      | 1      | 0      | 0      | 0      | 0      | 0      | 0      | 1      | 1      | 1      | 0      | 0      | 1      | 0      | 0      |



| Genus             | Cluster Number | Protein Counts | K00760 | K00799 | K00857 | K00876 | K01026 | K01031 | K01034 | K01039 | K01041 | K01045 | K01053 | K01055 | K01061 | K01066 | K01075 | K01077 | K01078 | K01101 |
|-------------------|----------------|----------------|--------|--------|--------|--------|--------|--------|--------|--------|--------|--------|--------|--------|--------|--------|--------|--------|--------|--------|
| Gloeobacter       | 2              | 67             | 1      | 1      | 0      | 0      | 0      | 0      | 0      | 0      | 0      | 0      | 0      | 0      | 1      | 0      | 0      | 1      | 0      | 0      |
| Gloeocapsa        | 1              | 20             | 0      | 1      | 0      | 0      | 0      | 0      | 0      | 0      | 0      | 0      | 1      | 0      | 1      | 0      | 0      | 1      | 0      | 0      |
| Gloeotheca        | 1              | 1              | 0      | 0      | 0      | 0      | 0      | 0      | 0      | 0      | 0      | 0      | 0      | 0      | 0      | 0      | 0      | 0      | 0      | 0      |
| Gluconacetobacter | 2              | 96             | 0      | 1      | 0      | 0      | 0      | 0      | 0      | 0      | 0      | 0      | 1      | 0      | 1      | 0      | 0      | 0      | 0      | 0      |
| Gluconobacter     | 2              | 76             | 0      | 1      | 1      | 0      | 0      | 0      | 0      | 0      | 0      | 0      | 1      | 0      | 1      | 0      | 0      | 0      | 1      | 0      |
| Gordonia          | 1              | 158            | 1      | 0      | 1      | 0      | 0      | 0      | 0      | 0      | 0      | 0      | 1      | 1      | 1      | 0      | 0      | 0      | 0      | 0      |
| Gordonibacter     | 1              | 32             | 0      | 0      | 0      | 0      | 0      | 0      | 0      | 0      | 0      | 0      | 0      | 0      | 0      | 0      | 0      | 0      | 0      | 0      |
| Gramella          | 2              | 104            | 0      | 0      | 1      | 1      | 0      | 0      | 0      | 0      | 0      | 0      | 0      | 0      | 0      | 1      | 0      | 0      | 0      | 0      |
| Granulibacter     | 2              | 90             | 0      | 1      | 0      | 0      | 0      | 0      | 0      | 0      | 0      | 0      | 0      | 0      | 1      | 1      | 0      | 0      | 1      | 0      |
| Granulicella      | 2              | 98             | 1      | 0      | 1      | 1      | 0      | 0      | 0      | 0      | 0      | 0      | 0      | 0      | 1      | 0      | 0      | 0      | 0      | 0      |
| Grimontia         | 1              | 9              | 0      | 0      | 0      | 0      | 0      | 0      | 0      | 0      | 0      | 0      | 0      | 0      | 0      | 0      | 0      | 0      | 0      | 0      |
| Haemophilus       | 2              | 117            | 1      | 1      | 1      | 1      | 0      | 0      | 1      | 0      | 0      | 0      | 1      | 0      | 0      | 0      | 0      | 0      | 0      | 0      |
| Hafnia            | 1              | 29             | 1      | 0      | 0      | 1      | 0      | 0      | 0      | 0      | 0      | 0      | 0      | 0      | 0      | 0      | 0      | 0      | 0      | 0      |
| Hahella           | 3              | 130            | 1      | 1      | 0      | 1      | 1      | 0      | 0      | 0      | 0      | 0      | 0      | 0      | 1      | 0      | 0      | 1      | 0      | 0      |
| Halalkalicoccus   | 1              | 18             | 0      | 0      | 1      | 1      | 0      | 0      | 0      | 0      | 0      | 0      | 0      | 0      | 0      | 0      | 0      | 0      | 0      | 1      |
| Halanaerobium     | 2              | 89             | 1      | 0      | 1      | 1      | 1      | 0      | 1      | 0      | 0      | 0      | 0      | 0      | 0      | 0      | 0      | 1      | 0      | 0      |
| Haliangium        | 2              | 108            | 1      | 1      | 0      | 1      | 0      | 0      | 0      | 0      | 0      | 0      | 1      | 0      | 0      | 0      | 0      | 0      | 0      | 0      |
| Haliscomenobacter | 2              | 107            | 1      | 0      | 1      | 1      | 0      | 0      | 0      | 0      | 0      | 0      | 1      | 0      | 1      | 0      | 0      | 1      | 0      | 0      |
| Haloarcula        | 1              | 22             | 0      | 0      | 0      | 0      | 0      | 0      | 0      | 0      | 0      | 0      | 0      | 0      | 0      | 0      | 0      | 0      | 0      | 0      |
| Halobacillus      | 1              | 19             | 1      | 0      | 1      | 1      | 0      | 0      | 1      | 0      | 0      | 0      | 0      | 0      | 0      | 0      | 0      | 1      | 0      | 0      |
| Halobacteriaceae  | 1              | 1              | 0      | 0      | 0      | 0      | 0      | 0      | 0      | 0      | 0      | 0      | 0      | 0      | 0      | 0      | 0      | 0      | 0      | 0      |
| Halobacterium     | 1              | 10             | 0      | 0      | 1      | 1      | 0      | 0      | 0      | 0      | 0      | 0      | 0      | 0      | 0      | 0      | 0      | 1      | 0      | 0      |
| Halobacteroides   | 1              | 14             | 1      | 0      | 1      | 1      | 0      | 0      | 0      | 0      | 0      | 0      | 0      | 0      | 0      | 0      | 0      | 1      | 0      | 0      |
| Haloferax         | 1              | 20             | 0      | 0      | 1      | 1      | 1      | 0      | 0      | 0      | 0      | 0      | 0      | 0      | 0      | 0      | 0      | 0      | 0      | 1      |
| Halogeometricum   | 1              | 12             | 0      | 0      | 1      | 1      | 0      | 0      | 0      | 0      | 0      | 0      | 0      | 0      | 0      | 0      | 0      | 0      | 0      | 0      |
| Halomicrobium     | 1              | 10             | 0      | 0      | 0      | 1      | 0      | 0      | 0      | 0      | 0      | 0      | 0      | 0      | 0      | 0      | 0      | 0      | 0      | 0      |
| Halomonas         | 1              | 149            | 1      | 1      | 0      | 0      | 1      | 0      | 0      | 1      | 0      | 0      | 1      | 0      | 1      | 0      | 1      | 1      | 0      | 0      |
| Halopiger         | 1              | 16             | 0      | 0      | 0      | 1      | 0      | 0      | 0      | 0      | 0      | 0      | 0      | 0      | 0      | 0      | 0      | 1      | 0      | 1      |
| Haloquadratum     | 1              | 19             | 0      | 0      | 1      | 0      | 0      | 0      | 0      | 0      | 0      | 0      | 0      | 0      | 0      | 0      | 0      | 0      | 0      | 0      |
| Halorhabdus       | 1              | 10             | 0      | 0      | 0      | 0      | 0      | 0      | 0      | 0      | 0      | 0      | 0      | 0      | 0      | 0      | 0      | 0      | 0      | 0      |
| Halorhodospira    | 2              | 71             | 1      | 1      | 0      | 0      | 0      | 0      | 0      | 0      | 0      | 0      | 0      | 0      | 0      | 0      | 0      | 1      | 0      | 0      |
| Halorubrum        | 1              | 16             | 0      | 0      | 1      | 1      | 0      | 0      | 0      | 0      | 0      | 0      | 0      | 0      | 0      | 0      | 0      | 0      | 0      | 1      |
| Haloterrigena     | 1              | 19             | 0      | 0      | 0      | 0      | 0      | 0      | 0      | 1      | 0      | 0      | 0      | 0      | 0      | 0      | 0      | 0      | 0      | 0      |
| Halothece         | 1              | 9              | 0      | 1      | 0      | 0      | 0      | 0      | 0      | 0      | 0      | 0      | 0      | 0      | 1      | 0      | 0      | 0      | 0      | 0      |
| Halothermothrix   | 2              | 50             | 1      | 0      | 1      | 1      | 0      | 0      | 0      | 0      | 0      | 0      | 0      | 0      | 0      | 0      | 0      | 0      | 0      | 0      |
| Halothiobacillus  | 2              | 65             | 1      | 0      | 0      | 0      | 0      | 0      | 0      | 0      | 0      | 0      | 0      | 0      | 0      | 0      | 0      | 0      | 0      | 0      |
| Halovivax         | 1              | 12             | 0      | 0      | 0      | 0      | 0      | 0      | 0      | 0      | 0      | 0      | 0      | 0      | 0      | 0      | 0      | 0      | 0      | 0      |
| Helicobacter      | 2              | 79             | 0      | 0      | 0      | 0      | 0      | 0      | 0      | 0      | 0      | 0      | 1      | 0      | 0      | 0      | 0      | 0      | 0      | 0      |
| Heliobacillus     | 1              | 4              | 0      | 0      | 0      | 0      | 0      | 0      | 0      | 0      | 0      | 0      | 0      | 0      | 0      | 0      | 0      | 0      | 0      | 0      |
| Heliobacterium    | 2              | 51             | 1      | 0      | 0      | 1      | 0      | 0      | 0      | 0      | 1      | 0      | 0      | 0      | 0      | 0      | 0      | 1      | 0      | 0      |
| Herbaspirillum    | 2              | 172            | 0      | 1      | 0      | 0      | 0      | 1      | 0      | 0      | 0      | 0      | 1      | 1      | 1      | 0      | 1      | 0      | 0      | 0      |
| Herminiimonas     | 3              | 89             | 0      | 1      | 0      | 0      | 0      | 0      | 0      | 0      | 0      | 0      | 0      | 0      | 1      | 0      | 0      | 0      | 0      | 0      |
| Herpetosiphon     | 3              | 90             | 1      | 0      | 1      | 1      | 0      | 0      | 0      | 0      | 0      | 0      | 0      | 0      | 1      | 0      | 0      | 0      | 0      | 1      |
| Hippea            | 2              | 44             | 1      | 0      | 0      | 0      | 0      | 0      | 0      | 1      | 0      | 0      | 0      | 0      | 0      | 0      | 0      | 0      | 0      | 0      |
| Hirschia          | 2              | 102            | 1      | 1      | 1      | 1      | 0      | 0      | 0      | 0      | 0      | 0      | 1      | 0      | 1      | 0      | 0      | 1      | 0      | 1      |
| Histophilus       | 2              | 72             | 1      | 0      | 1      | 1      | 0      | 0      | 1      | 0      | 0      | 0      | 1      | 0      | 0      | 0      | 0      | 0      | 0      | 0      |
| Hoeflea           | 1              | 16             | 1      | 0      | 1      | 0      | 0      | 0      | 0      | 0      | 0      | 0      | 0      | 0      | 0      | 0      | 0      | 0      | 0      | 0      |
| Hydrogenivirga    | 1              | 2              | 0      | 0      | 0      | 0      | 0      | 0      | 0      | 0      | 0      | 0      | 0      | 0      | 0      | 0      | 0      | 0      | 0      | 0      |
| Hydrogenobacter   | 2              | 55             | 1      | 0      | 0      | 0      | 0      | 0      | 0      | 0      | 0      | 0      | 0      | 0      | 1      | 0      | 0      | 0      | 0      | 1      |
| Hydrogenobaculum  | 2              | 44             | 1      | 0      | 0      | 0      | 0      | 0      | 0      | 0      | 0      | 0      | 0      | 0      | 1      | 0      | 0      | 0      | 0      | 0      |
| Hydrogenophaga    | 1              | 9              | 0      | 0      | 0      | 0      | 0      | 0      | 0      | 0      | 0      | 0      | 0      | 0      | 0      | 0      | 0      | 0      | 0      | 0      |
| Hylemonella       | 1              | 4              | 0      | 0      | 0      | 0      | 0      | 0      | 0      | 0      | 0      | 0      | 0      | 0      | 0      | 0      | 0      | 0      | 0      | 0      |

| Genus                 | Cluster Number | Protein Counts | K00760 | K00799 | K00857 | K00876 | K01026 | K01031 | K01034 | K01039 | K01041 | K01045 | K01053 | K01055 | K01061 | K01066 | K01075 | K01077 | K01078 | K01101 |
|-----------------------|----------------|----------------|--------|--------|--------|--------|--------|--------|--------|--------|--------|--------|--------|--------|--------|--------|--------|--------|--------|--------|
| Hyperthermus          | 1              | 6              | 0      | 0      | 0      | 0      | 0      | 0      | 0      | 0      | 0      | 0      | 0      | 0      | 0      | 0      | 0      | 0      | 0      | 0      |
| Hyphomicrobium        | 2              | 93             | 1      | 1      | 0      | 0      | 1      | 0      | 0      | 1      | 0      | 0      | 0      | 0      | 1      | 0      | 0      | 0      | 0      | 0      |
| Hyphomonas            | 3              | 105            | 1      | 1      | 1      | 1      | 0      | 0      | 0      | 0      | 0      | 0      | 1      | 0      | 1      | 1      | 0      | 1      | 0      | 0      |
| Ideonella             | 1              | 18             | 0      | 0      | 0      | 0      | 0      | 0      | 0      | 0      | 0      | 0      | 0      | 0      | 0      | 0      | 0      | 0      | 0      | 0      |
| Idiomarina            | 2              | 86             | 0      | 1      | 1      | 1      | 0      | 0      | 0      | 0      | 0      | 0      | 0      | 0      | 0      | 0      | 0      | 1      | 0      | 0      |
| Ignavibacterium       | 1              | 14             | 1      | 0      | 1      | 1      | 0      | 0      | 0      | 0      | 0      | 0      | 0      | 0      | 1      | 0      | 0      | 1      | 0      | 0      |
| Ignicoccus            | 1              | 5              | 0      | 0      | 0      | 0      | 0      | 0      | 0      | 0      | 0      | 0      | 0      | 0      | 0      | 0      | 0      | 0      | 0      | 1      |
| Ignisphaera           | 1              | 8              | 0      | 0      | 0      | 0      | 0      | 0      | 0      | 0      | 0      | 0      | 0      | 0      | 0      | 0      | 0      | 0      | 0      | 0      |
| Ilyobacter            | 2              | 85             | 1      | 0      | 1      | 1      | 1      | 0      | 1      | 0      | 0      | 0      | 0      | 0      | 0      | 0      | 0      | 0      | 0      | 0      |
| Intrasporangium       | 2              | 114            | 1      | 0      | 1      | 1      | 0      | 1      | 0      | 0      | 0      | 0      | 0      | 0      | 1      | 0      | 0      | 0      | 0      | 0      |
| Isoptericola          | 1              | 18             | 1      | 0      | 1      | 1      | 0      | 0      | 0      | 0      | 0      | 0      | 0      | 0      | 0      | 0      | 0      | 0      | 0      | 0      |
| Isosphaera            | 2              | 75             | 1      | 0      | 0      | 0      | 0      | 0      | 0      | 0      | 0      | 0      | 1      | 0      | 1      | 0      | 0      | 0      | 0      | 0      |
| Jannaschia            | 3              | 151            | 1      | 1      | 1      | 0      | 0      | 0      | 0      | 0      | 0      | 0      | 0      | 1      | 0      | 0      | 1      | 0      | 0      | 0      |
| Janthinobacterium     | 2              | 99             | 0      | 1      | 0      | 0      | 0      | 0      | 0      | 0      | 0      | 0      | 0      | 0      | 1      | 0      | 0      | 0      | 0      | 0      |
| Jonesia               | 2              | 56             | 1      | 0      | 1      | 1      | 0      | 0      | 0      | 0      | 0      | 0      | 0      | 0      | 0      | 0      | 0      | 0      | 0      | 0      |
| Joostella             | 1              | 3              | 0      | 0      | 0      | 0      | 0      | 0      | 0      | 0      | 0      | 0      | 0      | 0      | 0      | 0      | 0      | 0      | 0      | 0      |
| Kaistia               | 1              | 2              | 0      | 0      | 0      | 0      | 0      | 0      | 0      | 0      | 0      | 0      | 0      | 0      | 0      | 0      | 0      | 0      | 0      | 0      |
| Kangiella             | 2              | 84             | 1      | 1      | 0      | 0      | 0      | 0      | 0      | 0      | 0      | 0      | 0      | 0      | 0      | 0      | 0      | 0      | 0      | 0      |
| Ketogulonicigenium    | 2              | 102            | 1      | 1      | 1      | 0      | 0      | 1      | 0      | 0      | 0      | 0      | 0      | 1      | 0      | 0      | 0      | 1      | 0      | 0      |
| Kineococcus           | 1              | 24             | 1      | 0      | 1      | 1      | 0      | 0      | 0      | 0      | 0      | 0      | 1      | 1      | 1      | 0      | 0      | 1      | 0      | 0      |
| Kinetoplastibacterium | 1              | 2              | 0      | 0      | 0      | 0      | 0      | 0      | 0      | 0      | 0      | 0      | 0      | 0      | 0      | 0      | 0      | 0      | 0      | 0      |
| Kingella              | 1              | 4              | 0      | 0      | 0      | 0      | 0      | 0      | 0      | 0      | 0      | 0      | 0      | 0      | 0      | 0      | 0      | 0      | 0      | 0      |
| Kitasatospora         | 1              | 36             | 1      | 0      | 1      | 1      | 0      | 0      | 0      | 0      | 0      | 0      | 0      | 0      | 1      | 0      | 0      | 0      | 0      | 0      |
| Klebsiella            | 3              | 222            | 1      | 1      | 1      | 1      | 1      | 1      | 1      | 0      | 0      | 0      | 1      | 1      | 1      | 0      | 0      | 1      | 0      | 0      |
| Kluyvera              | 1              | 1              | 0      | 0      | 0      | 0      | 0      | 0      | 0      | 0      | 0      | 0      | 0      | 0      | 0      | 0      | 0      | 0      | 0      | 0      |
| Kocuria               | 2              | 87             | 1      | 0      | 1      | 0      | 0      | 1      | 0      | 0      | 0      | 0      | 0      | 1      | 0      | 0      | 0      | 0      | 0      | 0      |
| Kordia                | 1              | 5              | 0      | 0      | 0      | 0      | 0      | 0      | 0      | 0      | 0      | 0      | 0      | 0      | 0      | 0      | 0      | 0      | 0      | 0      |
| Kosmotoga             | 2              | 61             | 1      | 0      | 1      | 1      | 0      | 0      | 1      | 0      | 0      | 0      | 0      | 0      | 0      | 0      | 0      | 1      | 0      | 1      |
| Kribbella             | 2              | 99             | 1      | 0      | 1      | 1      | 0      | 0      | 0      | 0      | 0      | 0      | 1      | 1      | 1      | 0      | 0      | 0      | 0      | 0      |
| Krokinobacter         | 2              | 90             | 0      | 0      | 1      | 1      | 0      | 0      | 0      | 0      | 0      | 0      | 0      | 0      | 1      | 0      | 0      | 1      | 0      | 0      |
| Kyrpidia              | 2              | 113            | 1      | 0      | 0      | 1      | 0      | 0      | 0      | 0      | 0      | 0      | 0      | 0      | 1      | 0      | 0      | 0      | 0      | 1      |
| Kytococcus            | 2              | 70             | 1      | 0      | 1      | 1      | 0      | 0      | 0      | 0      | 0      | 0      | 0      | 0      | 0      | 0      | 0      | 0      | 0      | 0      |
| Labrenzia             | 1              | 4              | 0      | 0      | 0      | 0      | 0      | 0      | 0      | 0      | 0      | 0      | 0      | 0      | 0      | 0      | 0      | 0      | 0      | 0      |
| Lachnoanaerobaculum   | 1              | 1              | 0      | 0      | 0      | 0      | 0      | 0      | 0      | 0      | 0      | 0      | 0      | 0      | 0      | 0      | 0      | 0      | 0      | 0      |
| Lachnospiraceae       | 1              | 51             | 0      | 0      | 0      | 1      | 1      | 0      | 0      | 0      | 0      | 0      | 0      | 0      | 0      | 0      | 0      | 0      | 0      | 0      |
| Lacinutrix            | 1              | 20             | 0      | 0      | 1      | 1      | 0      | 0      | 0      | 0      | 0      | 0      | 0      | 0      | 0      | 0      | 0      | 0      | 0      | 0      |
| Lactobacillus         | 2              | 119            | 1      | 1      | 1      | 1      | 0      | 0      | 0      | 0      | 0      | 0      | 0      | 1      | 0      | 1      | 0      | 1      | 0      | 1      |
| Lactococcus           | 2              | 82             | 1      | 0      | 1      | 1      | 0      | 0      | 0      | 0      | 0      | 0      | 0      | 0      | 0      | 0      | 0      | 1      | 0      | 1      |
| Lamprocystis          | 1              | 2              | 0      | 0      | 0      | 0      | 0      | 0      | 0      | 0      | 0      | 0      | 0      | 0      | 0      | 0      | 0      | 0      | 0      | 0      |
| Laribacter            | 2              | 80             | 1      | 1      | 0      | 0      | 0      | 0      | 0      | 0      | 0      | 0      | 0      | 1      | 0      | 0      | 0      | 0      | 0      | 0      |
| Lawsonia              | 2              | 33             | 0      | 0      | 0      | 0      | 0      | 0      | 0      | 0      | 0      | 0      | 0      | 0      | 0      | 0      | 0      | 0      | 0      | 0      |
| Leadbetterella        | 2              | 79             | 1      | 0      | 1      | 1      | 0      | 0      | 0      | 0      | 0      | 0      | 1      | 0      | 1      | 0      | 0      | 1      | 0      | 0      |
| Leeuwenhoekiiella     | 1              | 2              | 0      | 0      | 0      | 0      | 0      | 0      | 0      | 0      | 0      | 0      | 0      | 0      | 0      | 0      | 0      | 0      | 0      | 0      |
| Legionella            | 2              | 117            | 1      | 1      | 1      | 1      | 0      | 0      | 0      | 0      | 0      | 0      | 0      | 0      | 1      | 0      | 0      | 0      | 1      | 0      |
| Leifsonia             | 2              | 48             | 1      | 0      | 1      | 0      | 0      | 0      | 0      | 0      | 0      | 0      | 0      | 0      | 0      | 0      | 0      | 0      | 0      | 0      |
| Leptolyngbya          | 1              | 10             | 0      | 1      | 0      | 0      | 0      | 0      | 0      | 0      | 0      | 0      | 0      | 0      | 1      | 0      | 0      | 0      | 0      | 0      |
| Leptospira            | 2              | 76             | 1      | 1      | 0      | 0      | 0      | 0      | 0      | 0      | 0      | 0      | 0      | 0      | 0      | 0      | 1      | 0      | 0      | 0      |
| Leptospirillum        | 1              | 10             | 1      | 0      | 0      | 0      | 0      | 0      | 0      | 0      | 0      | 0      | 0      | 0      | 1      | 0      | 0      | 0      | 0      | 0      |
| Leptothrix            | 3              | 186            | 0      | 1      | 0      | 0      | 0      | 1      | 1      | 0      | 0      | 0      | 1      | 0      | 1      | 0      | 1      | 0      | 0      | 0      |
| Leptotrichia          | 2              | 43             | 1      | 0      | 1      | 1      | 0      | 0      | 0      | 0      | 0      | 0      | 0      | 0      | 0      | 0      | 0      | 0      | 0      | 0      |
| Leucobacter           | 1              | 2              | 0      | 0      | 0      | 0      | 0      | 0      | 0      | 0      | 0      | 0      | 0      | 0      | 0      | 0      | 0      | 0      | 0      | 0      |
| Leuconostoc           | 2              | 64             | 1      | 0      | 1      | 1      | 0      | 0      | 0      | 0      | 0      | 0      | 0      | 0      | 0      | 0      | 0      | 0      | 0      | 1      |

| Genus                | Cluster Number | Protein Counts | K00760 | K00799 | K00857 | K00876 | K01026 | K01031 | K01034 | K01039 | K01041 | K01045 | K01053 | K01055 | K01061 | K01066 | K01075 | K01077 | K01078 | K01101 |
|----------------------|----------------|----------------|--------|--------|--------|--------|--------|--------|--------|--------|--------|--------|--------|--------|--------|--------|--------|--------|--------|--------|
| Liberibacter         | 1              | 4              | 0      | 1      | 0      | 0      | 0      | 0      | 0      | 0      | 0      | 0      | 0      | 0      | 0      | 0      | 0      | 0      | 0      | 0      |
| Limnohabitans        | 1              | 11             | 0      | 0      | 0      | 0      | 0      | 0      | 0      | 0      | 0      | 0      | 0      | 0      | 0      | 0      | 0      | 0      | 0      | 0      |
| Listeria             | 2              | 77             | 1      | 0      | 1      | 1      | 1      | 0      | 0      | 0      | 0      | 0      | 0      | 0      | 0      | 0      | 0      | 0      | 0      | 1      |
| Listeriaceae         | 1              | 6              | 0      | 0      | 0      | 0      | 0      | 0      | 0      | 0      | 0      | 0      | 0      | 0      | 0      | 0      | 0      | 0      | 0      | 0      |
| Listonella           | 1              | 38             | 1      | 0      | 1      | 1      | 0      | 0      | 0      | 0      | 0      | 0      | 0      | 0      | 0      | 0      | 0      | 0      | 0      | 0      |
| Loktanella           | 1              | 3              | 0      | 0      | 0      | 0      | 0      | 0      | 0      | 0      | 0      | 0      | 0      | 0      | 0      | 0      | 0      | 0      | 0      | 0      |
| Lysinibacillus       | 2              | 97             | 1      | 0      | 1      | 1      | 0      | 0      | 0      | 0      | 1      | 0      | 0      | 0      | 0      | 0      | 0      | 1      | 0      | 1      |
| Macrococcus          | 2              | 60             | 1      | 0      | 1      | 1      | 0      | 0      | 0      | 0      | 0      | 0      | 0      | 0      | 0      | 0      | 0      | 1      | 0      | 0      |
| Magnetococcus        | 2              | 64             | 1      | 1      | 0      | 0      | 0      | 0      | 0      | 0      | 0      | 0      | 0      | 0      | 0      | 0      | 0      | 0      | 0      | 0      |
| Magnetospirillum     | 2              | 113            | 0      | 1      | 0      | 0      | 0      | 0      | 0      | 0      | 0      | 0      | 0      | 0      | 1      | 0      | 0      | 0      | 0      | 0      |
| Mahella              | 2              | 58             | 1      | 0      | 0      | 1      | 0      | 0      | 0      | 0      | 0      | 0      | 0      | 0      | 0      | 0      | 0      | 0      | 0      | 1      |
| Mannheimia           | 2              | 85             | 1      | 1      | 1      | 1      | 0      | 0      | 0      | 0      | 0      | 0      | 1      | 0      | 0      | 0      | 0      | 0      | 0      | 0      |
| Maribacter           | 3              | 87             | 0      | 0      | 1      | 1      | 0      | 0      | 0      | 0      | 0      | 0      | 1      | 0      | 1      | 0      | 0      | 1      | 0      | 0      |
| Maricaulis           | 3              | 87             | 0      | 1      | 1      | 1      | 0      | 0      | 0      | 0      | 0      | 0      | 1      | 0      | 1      | 0      | 0      | 0      | 0      | 0      |
| Marichromatium       | 1              | 2              | 0      | 0      | 0      | 0      | 0      | 0      | 0      | 0      | 0      | 0      | 0      | 0      | 0      | 0      | 0      | 0      | 0      | 0      |
| Marinithermus        | 2              | 77             | 1      | 0      | 1      | 1      | 0      | 0      | 0      | 0      | 0      | 0      | 0      | 1      | 0      | 0      | 0      | 0      | 0      | 0      |
| Marinitoga           | 1              | 15             | 1      | 0      | 1      | 1      | 0      | 0      | 1      | 0      | 0      | 0      | 0      | 0      | 0      | 0      | 0      | 0      | 0      | 0      |
| Marinobacter         | 2              | 163            | 1      | 1      | 0      | 0      | 0      | 1      | 0      | 1      | 0      | 0      | 0      | 1      | 1      | 0      | 0      | 0      | 0      | 0      |
| Marinomonas          | 3              | 192            | 1      | 1      | 1      | 1      | 1      | 0      | 0      | 1      | 0      | 0      | 1      | 1      | 1      | 0      | 1      | 0      | 0      | 0      |
| Maritimibacter       | 1              | 7              | 0      | 0      | 0      | 0      | 0      | 0      | 0      | 0      | 0      | 0      | 0      | 0      | 0      | 0      | 0      | 0      | 0      | 0      |
| Marivirga            | 2              | 96             | 1      | 0      | 1      | 1      | 0      | 0      | 0      | 0      | 0      | 0      | 1      | 0      | 1      | 0      | 0      | 0      | 0      | 0      |
| Martella             | 1              | 3              | 0      | 0      | 0      | 0      | 0      | 0      | 0      | 0      | 0      | 0      | 0      | 0      | 0      | 0      | 0      | 0      | 0      | 0      |
| Marvinbryantia       | 1              | 1              | 0      | 0      | 0      | 0      | 0      | 0      | 0      | 0      | 0      | 0      | 0      | 0      | 0      | 0      | 0      | 0      | 0      | 0      |
| Massilia             | 1              | 4              | 0      | 0      | 0      | 0      | 0      | 0      | 0      | 0      | 0      | 0      | 0      | 0      | 0      | 0      | 0      | 0      | 0      | 0      |
| Mastigocladopsis     | 1              | 16             | 0      | 0      | 0      | 0      | 0      | 0      | 0      | 0      | 0      | 0      | 0      | 0      | 0      | 0      | 0      | 0      | 0      | 0      |
| Megamonas            | 1              | 47             | 1      | 0      | 0      | 0      | 0      | 0      | 0      | 0      | 0      | 0      | 0      | 0      | 0      | 0      | 0      | 0      | 0      | 0      |
| Megasphaera          | 1              | 14             | 1      | 0      | 0      | 1      | 1      | 0      | 1      | 0      | 0      | 0      | 0      | 0      | 0      | 0      | 0      | 1      | 0      | 0      |
| Meiothermus          | 2              | 110            | 1      | 0      | 1      | 1      | 0      | 0      | 0      | 0      | 0      | 0      | 0      | 1      | 1      | 0      | 0      | 1      | 0      | 0      |
| Melissococcus        | 2              | 46             | 1      | 0      | 1      | 1      | 0      | 0      | 0      | 0      | 0      | 0      | 0      | 0      | 0      | 0      | 0      | 0      | 0      | 1      |
| Mesoflavibacter      | 1              | 6              | 0      | 0      | 0      | 0      | 0      | 0      | 0      | 0      | 0      | 0      | 0      | 0      | 0      | 0      | 0      | 0      | 0      | 0      |
| Mesoplasma           | 1              | 23             | 1      | 0      | 1      | 1      | 0      | 0      | 0      | 0      | 0      | 0      | 0      | 0      | 0      | 0      | 0      | 0      | 0      | 0      |
| Mesorhizobium        | 2              | 201            | 1      | 1      | 1      | 0      | 0      | 0      | 0      | 1      | 1      | 0      | 1      | 1      | 1      | 0      | 0      | 0      | 0      | 0      |
| Mesotoga             | 1              | 14             | 1      | 0      | 1      | 1      | 0      | 0      | 1      | 0      | 0      | 0      | 0      | 0      | 0      | 0      | 0      | 1      | 0      | 0      |
| Metallosphaera       | 1              | 18             | 0      | 0      | 0      | 0      | 0      | 0      | 0      | 1      | 0      | 0      | 0      | 0      | 1      | 0      | 0      | 0      | 0      | 1      |
| Methanobacterium     | 1              | 7              | 0      | 0      | 0      | 0      | 0      | 0      | 0      | 0      | 0      | 0      | 0      | 0      | 0      | 0      | 0      | 0      | 0      | 0      |
| Methanobrevibacter   | 1              | 9              | 0      | 0      | 0      | 0      | 0      | 0      | 0      | 0      | 0      | 0      | 0      | 0      | 0      | 0      | 0      | 0      | 0      | 0      |
| Methanocaldococcus   | 1              | 6              | 0      | 0      | 0      | 0      | 0      | 0      | 0      | 0      | 0      | 0      | 0      | 0      | 0      | 0      | 0      | 0      | 0      | 0      |
| Methanocella         | 1              | 15             | 0      | 0      | 0      | 0      | 0      | 0      | 0      | 0      | 0      | 0      | 0      | 0      | 0      | 0      | 0      | 0      | 0      | 0      |
| Methanococcaceae     | 1              | 1              | 0      | 0      | 0      | 0      | 0      | 0      | 0      | 0      | 0      | 0      | 0      | 0      | 0      | 0      | 0      | 1      | 0      | 0      |
| Methanococcoides     | 1              | 5              | 0      | 0      | 0      | 0      | 0      | 0      | 0      | 0      | 0      | 0      | 0      | 0      | 0      | 0      | 0      | 0      | 0      | 0      |
| Methanococcus        | 1              | 9              | 0      | 0      | 0      | 0      | 0      | 0      | 0      | 0      | 0      | 0      | 0      | 0      | 0      | 0      | 0      | 1      | 0      | 0      |
| Methanocorpusculum   | 1              | 7              | 0      | 0      | 0      | 0      | 0      | 0      | 0      | 0      | 0      | 0      | 0      | 0      | 0      | 0      | 0      | 0      | 0      | 0      |
| Methanoculleus       | 1              | 8              | 0      | 0      | 0      | 0      | 0      | 0      | 0      | 0      | 0      | 0      | 0      | 0      | 1      | 0      | 0      | 0      | 0      | 0      |
| Methanohalobium      | 1              | 5              | 0      | 0      | 0      | 0      | 0      | 0      | 0      | 0      | 0      | 0      | 0      | 0      | 0      | 0      | 0      | 0      | 0      | 0      |
| Methanohalophilus    | 1              | 5              | 0      | 0      | 0      | 0      | 0      | 0      | 0      | 0      | 0      | 0      | 0      | 0      | 0      | 0      | 0      | 0      | 0      | 0      |
| Methanolobus         | 1              | 5              | 0      | 0      | 0      | 0      | 0      | 0      | 0      | 0      | 0      | 0      | 0      | 0      | 0      | 0      | 0      | 0      | 0      | 0      |
| Methanomethylovorans | 1              | 5              | 0      | 0      | 0      | 0      | 0      | 0      | 0      | 0      | 0      | 0      | 0      | 0      | 0      | 0      | 0      | 0      | 0      | 0      |
| Methanoplanus        | 1              | 7              | 0      | 0      | 0      | 0      | 0      | 0      | 0      | 0      | 0      | 0      | 0      | 0      | 0      | 0      | 0      | 0      | 0      | 0      |
| Methanopyrus         | 1              | 4              | 0      | 0      | 0      | 0      | 0      | 0      | 0      | 0      | 0      | 0      | 0      | 0      | 0      | 0      | 0      | 0      | 0      | 0      |
| Methanoregula        | 1              | 8              | 0      | 0      | 0      | 0      | 0      | 0      | 0      | 0      | 0      | 0      | 0      | 0      | 0      | 0      | 0      | 0      | 0      | 0      |
| Methanosaeta         | 1              | 9              | 0      | 0      | 0      | 0      | 0      | 0      | 0      | 0      | 0      | 0      | 0      | 0      | 1      | 0      | 0      | 1      | 0      | 0      |
| Methanosalsum        | 1              | 7              | 0      | 0      | 0      | 0      | 0      | 0      | 0      | 0      | 0      | 0      | 0      | 0      | 0      | 0      | 0      | 0      | 0      | 0      |

| Genus               | Cluster Number | Protein Counts | K00760 | K00799 | K00857 | K00876 | K01026 | K01031 | K01034 | K01039 | K01041 | K01045 | K01053 | K01055 | K01061 | K01066 | K01075 | K01077 | K01078 | K01101 |
|---------------------|----------------|----------------|--------|--------|--------|--------|--------|--------|--------|--------|--------|--------|--------|--------|--------|--------|--------|--------|--------|--------|
| Methanosarcina      | 1              | 18             | 0      | 0      | 0      | 0      | 0      | 0      | 0      | 0      | 0      | 0      | 0      | 0      | 1      | 0      | 0      | 1      | 0      | 0      |
| Methanosphaera      | 1              | 7              | 0      | 0      | 0      | 0      | 0      | 0      | 0      | 0      | 0      | 0      | 0      | 0      | 0      | 0      | 0      | 0      | 0      | 0      |
| Methanosphaerula    | 1              | 8              | 0      | 0      | 0      | 0      | 0      | 0      | 0      | 0      | 0      | 0      | 0      | 0      | 0      | 0      | 0      | 0      | 0      | 0      |
| Methanospirillum    | 1              | 6              | 0      | 0      | 0      | 0      | 0      | 0      | 0      | 0      | 0      | 0      | 0      | 0      | 0      | 0      | 0      | 0      | 0      | 0      |
| Methanothermobacter | 1              | 6              | 0      | 0      | 0      | 0      | 0      | 0      | 0      | 0      | 0      | 0      | 0      | 0      | 0      | 0      | 0      | 0      | 0      | 0      |
| Methanothermococcus | 1              | 5              | 0      | 0      | 0      | 0      | 0      | 0      | 0      | 0      | 0      | 0      | 0      | 0      | 0      | 0      | 0      | 0      | 0      | 0      |
| Methanothermus      | 1              | 5              | 0      | 0      | 0      | 0      | 0      | 0      | 0      | 0      | 0      | 0      | 0      | 0      | 0      | 0      | 0      | 0      | 0      | 0      |
| Methanotorris       | 1              | 5              | 0      | 0      | 0      | 0      | 0      | 0      | 0      | 0      | 0      | 0      | 0      | 0      | 0      | 0      | 0      | 0      | 0      | 0      |
| Methylacidiphilum   | 2              | 48             | 1      | 0      | 0      | 0      | 0      | 0      | 0      | 0      | 0      | 0      | 0      | 0      | 1      | 0      | 0      | 0      | 0      | 0      |
| Methylarcula        | 1              | 2              | 0      | 0      | 0      | 0      | 0      | 0      | 0      | 0      | 0      | 0      | 0      | 0      | 0      | 0      | 0      | 0      | 0      | 0      |
| Methylibium         | 1              | 38             | 0      | 1      | 0      | 0      | 0      | 0      | 0      | 0      | 0      | 0      | 0      | 0      | 1      | 0      | 0      | 0      | 0      | 0      |
| Methylobacillus     | 2              | 61             | 1      | 1      | 0      | 0      | 0      | 0      | 0      | 0      | 0      | 0      | 0      | 0      | 1      | 1      | 0      | 1      | 0      | 0      |
| Methylobacterium    | 3              | 236            | 1      | 1      | 0      | 1      | 1      | 0      | 1      | 0      | 0      | 0      | 1      | 1      | 1      | 0      | 0      | 1      | 0      | 0      |
| Methylocella        | 3              | 117            | 0      | 1      | 0      | 0      | 0      | 0      | 1      | 0      | 0      | 0      | 0      | 0      | 1      | 0      | 0      | 0      | 0      | 0      |
| Methylococcus       | 2              | 80             | 1      | 1      | 0      | 0      | 0      | 0      | 0      | 0      | 0      | 0      | 0      | 0      | 0      | 0      | 0      | 1      | 0      | 0      |
| Methylocystis       | 1              | 21             | 0      | 1      | 0      | 0      | 1      | 0      | 1      | 0      | 0      | 0      | 0      | 0      | 1      | 0      | 0      | 0      | 0      | 0      |
| Methyloferula       | 1              | 2              | 0      | 0      | 0      | 0      | 0      | 0      | 0      | 0      | 0      | 0      | 0      | 0      | 0      | 0      | 0      | 0      | 0      | 0      |
| Methylomicrobium    | 1              | 12             | 1      | 0      | 0      | 0      | 0      | 0      | 0      | 0      | 0      | 0      | 0      | 0      | 0      | 0      | 0      | 1      | 0      | 1      |
| Methylomonas        | 1              | 15             | 1      | 1      | 0      | 0      | 0      | 0      | 0      | 0      | 0      | 0      | 0      | 0      | 0      | 0      | 0      | 1      | 0      | 1      |
| Methylophaga        | 1              | 7              | 1      | 0      | 0      | 0      | 0      | 0      | 0      | 0      | 0      | 0      | 0      | 0      | 1      | 0      | 0      | 0      | 0      | 0      |
| Methylophilus       | 1              | 2              | 0      | 0      | 0      | 0      | 0      | 0      | 0      | 0      | 0      | 0      | 0      | 0      | 0      | 0      | 0      | 0      | 0      | 0      |
| Methylosinus        | 1              | 2              | 0      | 0      | 0      | 0      | 0      | 0      | 0      | 0      | 0      | 0      | 0      | 0      | 0      | 0      | 0      | 0      | 0      | 0      |
| Methylotenera       | 2              | 72             | 1      | 1      | 0      | 0      | 0      | 0      | 0      | 0      | 0      | 0      | 0      | 0      | 1      | 0      | 0      | 1      | 0      | 0      |
| Methyloversatilis   | 1              | 5              | 0      | 0      | 0      | 0      | 0      | 0      | 0      | 0      | 0      | 0      | 0      | 0      | 0      | 0      | 0      | 0      | 0      | 0      |
| Methylovorus        | 2              | 66             | 1      | 1      | 0      | 0      | 0      | 0      | 0      | 0      | 0      | 0      | 0      | 0      | 1      | 1      | 0      | 1      | 0      | 0      |
| Micavibrio          | 1              | 9              | 0      | 1      | 0      | 0      | 0      | 0      | 0      | 0      | 0      | 0      | 0      | 0      | 1      | 0      | 0      | 0      | 0      | 0      |
| Microbacterium      | 2              | 115            | 1      | 0      | 1      | 0      | 0      | 1      | 0      | 0      | 0      | 0      | 1      | 1      | 0      | 0      | 0      | 0      | 0      | 0      |
| Microchaete         | 1              | 23             | 0      | 0      | 0      | 0      | 0      | 0      | 0      | 0      | 0      | 0      | 0      | 0      | 0      | 0      | 0      | 0      | 0      | 0      |
| Micrococcus         | 2              | 72             | 1      | 0      | 1      | 1      | 0      | 0      | 0      | 0      | 0      | 0      | 0      | 0      | 1      | 0      | 0      | 0      | 0      | 0      |
| Microcoleus         | 1              | 17             | 0      | 1      | 0      | 0      | 0      | 0      | 0      | 0      | 0      | 0      | 1      | 0      | 1      | 0      | 0      | 0      | 0      | 0      |
| Microcystis         | 2              | 67             | 0      | 1      | 0      | 1      | 0      | 0      | 0      | 0      | 0      | 0      | 0      | 0      | 1      | 0      | 0      | 0      | 0      | 0      |
| Microlunatus        | 1              | 25             | 1      | 0      | 0      | 1      | 0      | 0      | 0      | 0      | 0      | 0      | 1      | 0      | 1      | 0      | 0      | 0      | 0      | 0      |
| Micromonospora      | 2              | 115            | 1      | 0      | 1      | 1      | 0      | 0      | 0      | 1      | 0      | 0      | 0      | 0      | 1      | 0      | 0      | 0      | 0      | 0      |
| Microvirga          | 1              | 6              | 0      | 0      | 0      | 0      | 0      | 0      | 0      | 0      | 0      | 0      | 0      | 0      | 0      | 0      | 0      | 0      | 0      | 0      |
| Mobiluncus          | 1              | 41             | 1      | 0      | 0      | 0      | 0      | 0      | 0      | 0      | 0      | 0      | 0      | 0      | 0      | 0      | 0      | 0      | 0      | 0      |
| Modestobacter       | 1              | 43             | 1      | 0      | 1      | 0      | 0      | 0      | 0      | 0      | 0      | 0      | 0      | 1      | 1      | 0      | 0      | 1      | 0      | 0      |
| Moorea              | 1              | 2              | 0      | 0      | 0      | 0      | 0      | 0      | 0      | 0      | 0      | 0      | 0      | 0      | 0      | 0      | 0      | 0      | 0      | 0      |
| Moorella            | 2              | 69             | 1      | 0      | 0      | 0      | 1      | 0      | 0      | 0      | 0      | 0      | 0      | 0      | 0      | 0      | 0      | 0      | 0      | 0      |
| Moraxella           | 2              | 66             | 1      | 1      | 0      | 0      | 0      | 0      | 0      | 0      | 0      | 0      | 0      | 0      | 0      | 0      | 0      | 0      | 0      | 0      |
| Morganella          | 1              | 29             | 1      | 1      | 1      | 1      | 0      | 0      | 1      | 0      | 0      | 0      | 0      | 0      | 0      | 0      | 0      | 1      | 0      | 0      |
| Moritella           | 1              | 2              | 0      | 0      | 0      | 0      | 0      | 0      | 0      | 0      | 0      | 0      | 0      | 0      | 0      | 0      | 0      | 0      | 0      | 0      |
| Muricauda           | 1              | 23             | 0      | 0      | 1      | 1      | 0      | 0      | 0      | 0      | 0      | 0      | 1      | 0      | 1      | 0      | 0      | 0      | 0      | 0      |
| Mycobacterium       | 3              | 306            | 1      | 0      | 0      | 0      | 0      | 1      | 0      | 1      | 1      | 0      | 1      | 1      | 1      | 1      | 0      | 1      | 1      | 0      |
| Mycoplasma          | 1              | 53             | 1      | 0      | 1      | 1      | 0      | 0      | 0      | 0      | 0      | 0      | 0      | 0      | 0      | 0      | 0      | 0      | 0      | 0      |
| Myxococcus          | 2              | 110            | 1      | 1      | 1      | 1      | 0      | 0      | 0      | 1      | 0      | 1      | 0      | 1      | 1      | 0      | 0      | 0      | 0      | 0      |
| Nakamurella         | 2              | 115            | 1      | 0      | 1      | 0      | 0      | 1      | 0      | 0      | 0      | 0      | 0      | 0      | 1      | 0      | 0      | 0      | 0      | 0      |
| napthalene          | 1              | 2              | 0      | 0      | 0      | 0      | 0      | 0      | 0      | 0      | 0      | 0      | 0      | 0      | 0      | 0      | 0      | 0      | 0      | 0      |
| Natranaerobius      | 2              | 55             | 1      | 0      | 1      | 0      | 1      | 0      | 1      | 0      | 0      | 0      | 0      | 0      | 0      | 0      | 0      | 0      | 0      | 0      |
| Natrialba           | 1              | 16             | 0      | 0      | 0      | 1      | 0      | 0      | 0      | 1      | 0      | 0      | 0      | 0      | 0      | 0      | 0      | 0      | 0      | 0      |
| Natrinema           | 1              | 16             | 0      | 0      | 0      | 1      | 1      | 0      | 0      | 1      | 0      | 0      | 0      | 0      | 0      | 0      | 0      | 0      | 0      | 0      |
| Natronobacterium    | 1              | 11             | 0      | 0      | 0      | 1      | 0      | 0      | 0      | 0      | 0      | 0      | 0      | 0      | 0      | 0      | 0      | 0      | 0      | 0      |
| Natronococcus       | 1              | 21             | 0      | 0      | 0      | 1      | 0      | 0      | 0      | 0      | 0      | 0      | 0      | 0      | 0      | 0      | 0      | 1      | 0      | 0      |

| Genus             | Cluster Number | Protein Counts | K00760 | K00799 | K00857 | K00876 | K01026 | K01031 | K01034 | K01039 | K01041 | K01045 | K01053 | K01055 | K01061 | K01066 | K01075 | K01077 | K01078 | K01101 |
|-------------------|----------------|----------------|--------|--------|--------|--------|--------|--------|--------|--------|--------|--------|--------|--------|--------|--------|--------|--------|--------|--------|
| Natronomonas      | 1              | 20             | 0      | 0      | 0      | 0      | 0      | 0      | 0      | 0      | 0      | 0      | 0      | 0      | 0      | 1      | 0      | 0      | 0      | 0      |
| Nautilia          | 2              | 48             | 0      | 0      | 0      | 0      | 0      | 0      | 0      | 0      | 0      | 0      | 0      | 0      | 0      | 0      | 0      | 0      | 0      | 0      |
| Neisseria         | 2              | 67             | 1      | 0      | 0      | 0      | 0      | 0      | 0      | 0      | 0      | 0      | 0      | 0      | 0      | 0      | 0      | 0      | 0      | 0      |
| Neisseriaceae     | 1              | 1              | 0      | 0      | 0      | 0      | 0      | 0      | 0      | 0      | 0      | 0      | 0      | 0      | 0      | 0      | 0      | 0      | 0      | 0      |
| Neorickettsia     | 1              | 31             | 0      | 0      | 0      | 0      | 0      | 0      | 0      | 0      | 0      | 0      | 0      | 0      | 0      | 0      | 0      | 0      | 0      | 0      |
| Neptuniibacter    | 1              | 2              | 0      | 0      | 0      | 0      | 0      | 0      | 0      | 0      | 0      | 0      | 0      | 0      | 0      | 0      | 0      | 0      | 0      | 0      |
| Niastella         | 1              | 21             | 1      | 0      | 1      | 0      | 0      | 0      | 0      | 0      | 0      | 0      | 1      | 0      | 1      | 0      | 0      | 1      | 0      | 0      |
| Nitratifractor    | 2              | 54             | 0      | 0      | 0      | 0      | 0      | 0      | 0      | 0      | 0      | 0      | 0      | 0      | 0      | 0      | 0      | 0      | 0      | 1      |
| Nitratireductor   | 1              | 19             | 0      | 0      | 0      | 0      | 0      | 0      | 0      | 0      | 0      | 0      | 0      | 0      | 0      | 0      | 0      | 0      | 0      | 0      |
| Nitratiruptor     | 2              | 40             | 0      | 0      | 0      | 0      | 0      | 0      | 0      | 0      | 0      | 0      | 0      | 0      | 0      | 0      | 0      | 0      | 0      | 0      |
| Nitrobacter       | 2              | 99             | 0      | 1      | 0      | 0      | 0      | 0      | 1      | 0      | 1      | 0      | 0      | 1      | 0      | 0      | 0      | 0      | 0      | 0      |
| Nitrococcus       | 1              | 2              | 0      | 0      | 0      | 0      | 0      | 0      | 0      | 0      | 0      | 0      | 0      | 0      | 0      | 0      | 0      | 0      | 0      | 0      |
| Nitrosococcus     | 2              | 94             | 1      | 0      | 0      | 0      | 0      | 0      | 0      | 0      | 0      | 0      | 1      | 0      | 0      | 0      | 0      | 0      | 0      | 0      |
| Nitrosomonas      | 2              | 72             | 1      | 1      | 0      | 0      | 0      | 0      | 0      | 0      | 0      | 0      | 0      | 0      | 0      | 0      | 0      | 0      | 0      | 0      |
| Nitrosopumilaceae | 1              | 7              | 0      | 0      | 0      | 0      | 0      | 0      | 0      | 0      | 0      | 0      | 0      | 0      | 0      | 0      | 0      | 0      | 0      | 0      |
| Nitrosopumilus    | 1              | 11             | 0      | 0      | 0      | 0      | 0      | 0      | 0      | 0      | 0      | 0      | 0      | 0      | 1      | 0      | 0      | 0      | 0      | 0      |
| Nitrospira        | 2              | 74             | 1      | 1      | 0      | 0      | 0      | 0      | 0      | 0      | 0      | 0      | 0      | 0      | 0      | 0      | 0      | 0      | 0      | 0      |
| Nocardia          | 2              | 185            | 1      | 0      | 0      | 0      | 0      | 0      | 0      | 1      | 1      | 0      | 1      | 1      | 1      | 0      | 0      | 1      | 0      | 0      |
| Nocardioidaceae   | 1              | 2              | 0      | 0      | 0      | 0      | 0      | 0      | 0      | 0      | 0      | 0      | 0      | 0      | 0      | 0      | 0      | 0      | 0      | 0      |
| Nocardioides      | 2              | 157            | 1      | 0      | 1      | 1      | 0      | 1      | 0      | 1      | 1      | 0      | 0      | 0      | 0      | 0      | 0      | 0      | 0      | 0      |
| Nocardiopsis      | 2              | 102            | 1      | 0      | 1      | 0      | 0      | 0      | 0      | 1      | 0      | 0      | 0      | 1      | 0      | 0      | 0      | 0      | 0      | 0      |
| Nodularia         | 1              | 22             | 0      | 1      | 0      | 0      | 0      | 0      | 0      | 0      | 0      | 0      | 0      | 0      | 0      | 0      | 0      | 0      | 0      | 0      |
| Nonlabens         | 1              | 19             | 0      | 0      | 1      | 1      | 0      | 0      | 0      | 0      | 0      | 0      | 0      | 0      | 1      | 0      | 0      | 0      | 0      | 0      |
| Nostoc            | 2              | 111            | 0      | 1      | 0      | 0      | 0      | 0      | 0      | 0      | 0      | 0      | 1      | 0      | 1      | 0      | 0      | 1      | 0      | 0      |
| Nostocaceae       | 1              | 2              | 0      | 0      | 0      | 0      | 0      | 0      | 0      | 0      | 0      | 0      | 0      | 0      | 0      | 0      | 0      | 0      | 0      | 0      |
| Novosphingobium   | 2              | 169            | 0      | 1      | 1      | 0      | 0      | 0      | 0      | 1      | 0      | 0      | 1      | 1      | 1      | 0      | 1      | 0      | 0      | 0      |
| Oceanibaculum     | 1              | 3              | 0      | 0      | 0      | 0      | 0      | 0      | 0      | 0      | 0      | 0      | 0      | 0      | 0      | 0      | 0      | 0      | 0      | 0      |
| Oceanibulbus      | 1              | 12             | 1      | 0      | 0      | 0      | 0      | 0      | 0      | 0      | 0      | 0      | 0      | 0      | 0      | 0      | 0      | 0      | 0      | 0      |
| Oceanicola        | 1              | 9              | 0      | 0      | 0      | 0      | 0      | 0      | 0      | 0      | 0      | 0      | 0      | 0      | 0      | 0      | 0      | 0      | 0      | 0      |
| Oceanimonas       | 1              | 33             | 1      | 1      | 0      | 0      | 0      | 0      | 0      | 1      | 0      | 0      | 0      | 1      | 1      | 0      | 0      | 0      | 0      | 0      |
| Oceaniovalibus    | 1              | 2              | 0      | 0      | 0      | 0      | 0      | 0      | 0      | 0      | 0      | 0      | 0      | 0      | 0      | 0      | 0      | 0      | 0      | 0      |
| Oceanithermus     | 2              | 72             | 1      | 0      | 1      | 1      | 0      | 0      | 0      | 0      | 0      | 0      | 0      | 0      | 0      | 0      | 0      | 0      | 0      | 0      |
| Oceanobacillus    | 2              | 91             | 1      | 0      | 1      | 1      | 0      | 0      | 0      | 0      | 0      | 0      | 0      | 0      | 0      | 0      | 0      | 1      | 0      | 0      |
| Oceanospirillum   | 1              | 2              | 0      | 0      | 0      | 0      | 0      | 0      | 0      | 0      | 0      | 0      | 0      | 0      | 0      | 0      | 0      | 0      | 0      | 0      |
| Ochrobactrum      | 2              | 133            | 1      | 1      | 0      | 0      | 0      | 1      | 0      | 0      | 0      | 0      | 1      | 1      | 1      | 0      | 0      | 0      | 0      | 0      |
| Octadecabacter    | 1              | 29             | 1      | 1      | 1      | 0      | 0      | 1      | 0      | 0      | 0      | 0      | 0      | 1      | 0      | 0      | 0      | 0      | 0      | 0      |
| Oenococcus        | 2              | 41             | 1      | 0      | 1      | 1      | 0      | 0      | 0      | 0      | 0      | 0      | 0      | 0      | 0      | 0      | 0      | 0      | 0      | 0      |
| Oleomonas         | 1              | 2              | 0      | 0      | 0      | 0      | 0      | 0      | 0      | 0      | 0      | 0      | 0      | 0      | 0      | 0      | 0      | 0      | 0      | 0      |
| Oligotropha       | 3              | 87             | 0      | 1      | 0      | 0      | 0      | 0      | 0      | 1      | 0      | 0      | 0      | 1      | 1      | 0      | 0      | 0      | 0      | 0      |
| Olsenella         | 2              | 40             | 1      | 0      | 1      | 0      | 0      | 0      | 0      | 0      | 0      | 0      | 0      | 0      | 0      | 0      | 0      | 0      | 0      | 0      |
| Opitutus          | 2              | 67             | 1      | 0      | 0      | 1      | 0      | 0      | 0      | 0      | 0      | 0      | 1      | 0      | 0      | 0      | 0      | 0      | 0      | 0      |
| Orientia          | 1              | 21             | 0      | 1      | 0      | 0      | 0      | 0      | 0      | 0      | 0      | 0      | 0      | 0      | 0      | 0      | 0      | 0      | 0      | 0      |
| Ornithobacterium  | 1              | 11             | 1      | 0      | 1      | 1      | 0      | 0      | 0      | 0      | 0      | 0      | 0      | 0      | 0      | 0      | 0      | 0      | 0      | 0      |
| Oscillatoria      | 1              | 16             | 0      | 1      | 0      | 0      | 0      | 0      | 0      | 0      | 0      | 0      | 1      | 0      | 1      | 0      | 0      | 0      | 0      | 0      |
| Oscillatoriales   | 1              | 2              | 0      | 0      | 0      | 0      | 0      | 0      | 0      | 0      | 0      | 0      | 0      | 0      | 0      | 0      | 0      | 0      | 0      | 0      |
| Oscillibacter     | 1              | 20             | 1      | 0      | 1      | 1      | 1      | 0      | 1      | 1      | 0      | 0      | 0      | 0      | 0      | 0      | 0      | 0      | 0      | 0      |
| Owenweeksia       | 1              | 15             | 0      | 0      | 1      | 0      | 0      | 0      | 0      | 0      | 0      | 0      | 0      | 0      | 0      | 0      | 0      | 1      | 0      | 0      |
| Oxalobacteraceae  | 1              | 4              | 0      | 0      | 0      | 0      | 0      | 0      | 0      | 0      | 0      | 0      | 0      | 0      | 0      | 0      | 0      | 0      | 0      | 0      |
| Paenibacillus     | 2              | 152            | 1      | 0      | 1      | 1      | 0      | 0      | 1      | 0      | 0      | 0      | 0      | 1      | 1      | 0      | 0      | 1      | 0      | 1      |
| Paludibacter      | 2              | 67             | 1      | 0      | 1      | 1      | 0      | 0      | 0      | 0      | 0      | 0      | 0      | 0      | 0      | 0      | 0      | 0      | 0      | 0      |
| Pandoraea         | 1              | 18             | 0      | 0      | 0      | 0      | 0      | 0      | 0      | 0      | 0      | 0      | 0      | 0      | 0      | 0      | 0      | 0      | 0      | 0      |
| Pannonibacter     | 1              | 3              | 0      | 0      | 0      | 0      | 0      | 0      | 0      | 0      | 0      | 0      | 0      | 0      | 0      | 0      | 0      | 0      | 0      | 0      |

| Genus              | Cluster Number | Protein Counts | K00760 | K00799 | K00857 | K00876 | K01026 | K01031 | K01034 | K01039 | K01041 | K01045 | K01053 | K01055 | K01061 | K01066 | K01075 | K01077 | K01078 | K01101 |
|--------------------|----------------|----------------|--------|--------|--------|--------|--------|--------|--------|--------|--------|--------|--------|--------|--------|--------|--------|--------|--------|--------|
| Pantholops         | 1              | 23             | 0      | 1      | 0      | 0      | 0      | 0      | 0      | 0      | 0      | 0      | 0      | 0      | 1      | 0      | 0      | 0      | 0      | 0      |
| Pantoea            | 2              | 181            | 1      | 1      | 1      | 1      | 0      | 1      | 0      | 0      | 0      | 0      | 1      | 0      | 1      | 0      | 0      | 1      | 0      | 0      |
| Parabacteroides    | 2              | 64             | 1      | 0      | 1      | 1      | 0      | 0      | 0      | 0      | 0      | 0      | 0      | 0      | 0      | 0      | 0      | 1      | 0      | 0      |
| Parachlamydia      | 1              | 11             | 0      | 0      | 0      | 1      | 0      | 0      | 0      | 0      | 0      | 0      | 1      | 0      | 0      | 0      | 0      | 0      | 0      | 0      |
| Paracoccus         | 2              | 169            | 0      | 1      | 1      | 0      | 0      | 1      | 0      | 1      | 0      | 0      | 0      | 1      | 1      | 0      | 0      | 0      | 0      | 0      |
| Parvibaculum       | 3              | 117            | 1      | 1      | 0      | 0      | 0      | 0      | 0      | 0      | 0      | 0      | 1      | 0      | 1      | 0      | 0      | 0      | 0      | 0      |
| Parvularcula       | 2              | 72             | 1      | 1      | 0      | 0      | 0      | 0      | 0      | 0      | 0      | 0      | 0      | 0      | 0      | 0      | 0      | 1      | 0      | 0      |
| Pasteurella        | 2              | 85             | 1      | 0      | 1      | 1      | 0      | 0      | 0      | 0      | 0      | 0      | 1      | 0      | 0      | 0      | 0      | 0      | 0      | 0      |
| Pasteurellaceae    | 1              | 2              | 0      | 0      | 0      | 0      | 0      | 0      | 0      | 0      | 0      | 0      | 0      | 0      | 0      | 0      | 0      | 0      | 0      | 0      |
| Pectobacterium     | 1              | 44             | 1      | 1      | 1      | 1      | 0      | 0      | 1      | 0      | 0      | 0      | 1      | 0      | 1      | 1      | 0      | 1      | 0      | 0      |
| Pediococcus        | 1              | 43             | 1      | 0      | 1      | 1      | 0      | 0      | 0      | 0      | 0      | 0      | 0      | 0      | 0      | 0      | 0      | 0      | 0      | 0      |
| Pedobacter         | 2              | 88             | 1      | 0      | 1      | 1      | 0      | 0      | 0      | 0      | 0      | 0      | 1      | 0      | 1      | 0      | 0      | 1      | 0      | 0      |
| Pelagibaca         | 1              | 10             | 0      | 0      | 0      | 0      | 0      | 0      | 0      | 0      | 0      | 0      | 0      | 0      | 0      | 0      | 0      | 0      | 0      | 0      |
| Pelagibacterium    | 1              | 39             | 0      | 1      | 1      | 0      | 0      | 0      | 0      | 1      | 0      | 0      | 0      | 1      | 0      | 0      | 1      | 1      | 0      | 0      |
| Pelobacter         | 2              | 85             | 1      | 0      | 0      | 0      | 0      | 0      | 0      | 0      | 0      | 0      | 0      | 0      | 0      | 0      | 0      | 1      | 0      | 0      |
| Pelodictyon        | 2              | 62             | 1      | 0      | 0      | 0      | 0      | 0      | 0      | 0      | 0      | 0      | 0      | 0      | 0      | 0      | 0      | 1      | 1      | 0      |
| Pelosinus          | 1              | 1              | 0      | 0      | 0      | 0      | 0      | 0      | 0      | 0      | 0      | 0      | 0      | 0      | 0      | 0      | 0      | 0      | 0      | 0      |
| Pelotomaculum      | 2              | 60             | 1      | 0      | 0      | 0      | 1      | 0      | 0      | 1      | 0      | 0      | 0      | 0      | 0      | 0      | 0      | 0      | 0      | 0      |
| Peptostreptococcus | 1              | 1              | 0      | 0      | 0      | 0      | 0      | 0      | 0      | 0      | 0      | 0      | 0      | 0      | 0      | 0      | 0      | 0      | 0      | 0      |
| Persephonella      | 2              | 55             | 1      | 0      | 0      | 1      | 0      | 0      | 0      | 0      | 0      | 0      | 0      | 0      | 0      | 0      | 0      | 0      | 0      | 1      |
| Petrotoga          | 2              | 72             | 1      | 0      | 1      | 1      | 0      | 0      | 1      | 0      | 0      | 0      | 0      | 0      | 0      | 0      | 0      | 1      | 0      | 1      |
| Phaeobacter        | 2              | 55             | 1      | 1      | 1      | 0      | 0      | 0      | 0      | 0      | 0      | 0      | 0      | 1      | 0      | 0      | 0      | 0      | 0      | 0      |
| Phenylobacterium   | 3              | 103            | 1      | 1      | 0      | 0      | 0      | 0      | 0      | 0      | 0      | 0      | 1      | 0      | 1      | 0      | 0      | 0      | 0      | 0      |
| Photobacterium     | 2              | 119            | 1      | 1      | 1      | 1      | 0      | 0      | 0      | 0      | 0      | 0      | 0      | 0      | 0      | 0      | 0      | 1      | 0      | 0      |
| Photorhabdus       | 2              | 149            | 1      | 1      | 1      | 1      | 0      | 0      | 1      | 1      | 0      | 0      | 0      | 0      | 0      | 0      | 0      | 1      | 0      | 0      |
| Phycisphaera       | 1              | 9              | 1      | 0      | 0      | 0      | 0      | 0      | 0      | 0      | 0      | 0      | 1      | 0      | 0      | 0      | 0      | 1      | 0      | 0      |
| Phyllobacterium    | 1              | 6              | 0      | 0      | 0      | 0      | 0      | 0      | 0      | 0      | 0      | 0      | 0      | 0      | 0      | 0      | 0      | 0      | 0      | 0      |
| Picrophilus        | 1              | 15             | 0      | 0      | 0      | 0      | 0      | 0      | 0      | 0      | 0      | 0      | 0      | 0      | 1      | 1      | 0      | 0      | 0      | 0      |
| Pirellula          | 2              | 85             | 1      | 0      | 0      | 0      | 0      | 0      | 0      | 0      | 0      | 0      | 1      | 0      | 0      | 0      | 0      | 0      | 0      | 0      |
| Planctomyces       | 2              | 93             | 1      | 0      | 0      | 0      | 0      | 0      | 0      | 0      | 0      | 0      | 1      | 0      | 1      | 0      | 0      | 1      | 0      | 0      |
| Plautia            | 1              | 17             | 0      | 0      | 0      | 1      | 0      | 0      | 0      | 0      | 0      | 0      | 0      | 0      | 0      | 0      | 0      | 0      | 0      | 0      |
| Plesiomonas        | 1              | 4              | 0      | 0      | 0      | 0      | 0      | 0      | 0      | 0      | 0      | 0      | 0      | 0      | 0      | 0      | 0      | 0      | 0      | 0      |
| Pleurocapsa        | 1              | 23             | 0      | 1      | 0      | 0      | 0      | 0      | 0      | 0      | 0      | 0      | 0      | 0      | 1      | 0      | 0      | 0      | 0      | 0      |
| Polaribacter       | 2              | 74             | 0      | 0      | 1      | 1      | 0      | 0      | 0      | 0      | 0      | 0      | 0      | 0      | 1      | 0      | 0      | 0      | 0      | 0      |
| Polaromonas        | 3              | 238            | 0      | 1      | 0      | 0      | 0      | 1      | 0      | 0      | 0      | 0      | 1      | 1      | 1      | 0      | 1      | 0      | 0      | 0      |
| Polymorphum        | 3              | 173            | 1      | 1      | 1      | 0      | 0      | 0      | 0      | 1      | 0      | 0      | 0      | 1      | 1      | 0      | 0      | 0      | 0      | 0      |
| Polynucleobacter   | 1              | 19             | 0      | 1      | 0      | 0      | 1      | 1      | 0      | 0      | 0      | 0      | 0      | 0      | 1      | 0      | 0      | 1      | 0      | 0      |
| Ponticaulis        | 1              | 1              | 0      | 0      | 0      | 0      | 0      | 0      | 0      | 0      | 0      | 0      | 0      | 0      | 0      | 0      | 0      | 0      | 0      | 0      |
| Porphyromonas      | 2              | 63             | 1      | 0      | 1      | 1      | 0      | 0      | 1      | 0      | 0      | 0      | 0      | 0      | 0      | 0      | 0      | 1      | 0      | 0      |
| Prevotella         | 1              | 65             | 1      | 0      | 1      | 1      | 0      | 0      | 0      | 0      | 0      | 0      | 0      | 0      | 0      | 0      | 0      | 0      | 0      | 0      |
| Prochlorococcus    | 2              | 68             | 0      | 1      | 0      | 1      | 0      | 0      | 0      | 0      | 0      | 0      | 0      | 0      | 1      | 0      | 0      | 1      | 0      | 0      |
| Propionibacterium  | 1              | 62             | 1      | 0      | 1      | 1      | 0      | 0      | 0      | 0      | 1      | 0      | 0      | 1      | 0      | 1      | 0      | 0      | 0      | 0      |
| Prosthecochloris   | 1              | 16             | 1      | 0      | 0      | 1      | 0      | 0      | 0      | 0      | 0      | 0      | 0      | 0      | 0      | 0      | 0      | 1      | 1      | 0      |
| Proteobacteria     | 1              | 19             | 0      | 1      | 0      | 0      | 0      | 0      | 0      | 0      | 0      | 0      | 0      | 0      | 0      | 0      | 0      | 0      | 0      | 0      |
| Proteus            | 2              | 113            | 1      | 1      | 1      | 1      | 0      | 0      | 0      | 0      | 0      | 0      | 0      | 0      | 0      | 0      | 0      | 1      | 0      | 0      |
| Providencia        | 1              | 38             | 1      | 1      | 1      | 1      | 0      | 0      | 0      | 0      | 0      | 0      | 0      | 0      | 0      | 0      | 0      | 1      | 0      | 0      |
| Pseudaminobacter   | 1              | 10             | 1      | 0      | 0      | 0      | 0      | 0      | 0      | 0      | 0      | 0      | 0      | 0      | 0      | 0      | 0      | 0      | 0      | 0      |
| Pseudanabaena      | 1              | 11             | 0      | 1      | 0      | 1      | 0      | 0      | 0      | 0      | 0      | 0      | 0      | 0      | 1      | 0      | 0      | 0      | 0      | 0      |
| Pseudoalteromonas  | 2              | 188            | 0      | 1      | 1      | 1      | 0      | 0      | 0      | 1      | 0      | 0      | 1      | 0      | 1      | 0      | 0      | 1      | 0      | 0      |
| Pseudochrobactrum  | 1              | 7              | 0      | 1      | 0      | 0      | 0      | 0      | 0      | 0      | 0      | 0      | 0      | 0      | 0      | 0      | 0      | 0      | 0      | 0      |
| Pseudogulbenkiania | 1              | 40             | 1      | 1      | 0      | 1      | 0      | 1      | 0      | 0      | 0      | 0      | 0      | 1      | 1      | 0      | 0      | 0      | 0      | 0      |
| pseudomallei       | 3              | 131            | 1      | 1      | 0      | 0      | 0      | 1      | 0      | 0      | 0      | 0      | 1      | 1      | 1      | 1      | 0      | 0      | 0      | 0      |

| Genus                   | Cluster Number | Protein Counts | K00760 | K00799 | K00857 | K00876 | K01026 | K01031 | K01034 | K01039 | K01041 | K01045 | K01053 | K01055 | K01061 | K01066 | K01075 | K01077 | K01078 | K01101 |
|-------------------------|----------------|----------------|--------|--------|--------|--------|--------|--------|--------|--------|--------|--------|--------|--------|--------|--------|--------|--------|--------|--------|
| Pseudomonas             | 3              | 381            | 1      | 1      | 1      | 0      | 1      | 1      | 0      | 1      | 0      | 0      | 1      | 1      | 1      | 1      | 1      | 1      | 1      | 0      |
| Pseudonocardia          | 3              | 180            | 1      | 0      | 0      | 0      | 0      | 1      | 0      | 1      | 0      | 0      | 1      | 1      | 1      | 0      | 0      | 0      | 0      | 0      |
| Pseudorhodobacter       | 1              | 4              | 0      | 0      | 0      | 0      | 0      | 0      | 0      | 0      | 0      | 0      | 0      | 0      | 0      | 0      | 0      | 0      | 0      | 0      |
| Pseudovibrio            | 1              | 33             | 1      | 1      | 1      | 0      | 1      | 0      | 0      | 1      | 0      | 0      | 0      | 0      | 0      | 0      | 1      | 1      | 0      | 0      |
| Pseudoxanthomonas       | 2              | 124            | 1      | 1      | 1      | 0      | 0      | 0      | 0      | 0      | 0      | 0      | 1      | 1      | 1      | 0      | 0      | 1      | 1      | 0      |
| Psychrobacter           | 2              | 124            | 1      | 1      | 0      | 0      | 0      | 1      | 0      | 0      | 0      | 0      | 0      | 1      | 0      | 0      | 0      | 0      | 0      | 0      |
| Psychroflexus           | 1              | 22             | 1      | 0      | 1      | 1      | 0      | 0      | 0      | 0      | 0      | 0      | 1      | 0      | 1      | 0      | 0      | 0      | 0      | 0      |
| Psychromonas            | 2              | 110            | 1      | 1      | 1      | 1      | 0      | 0      | 0      | 0      | 0      | 0      | 0      | 0      | 0      | 0      | 0      | 1      | 0      | 0      |
| Pusillimonas            | 3              | 111            | 0      | 1      | 0      | 0      | 0      | 1      | 0      | 0      | 0      | 0      | 0      | 0      | 1      | 0      | 0      | 0      | 0      | 0      |
| Pyrobaculum             | 1              | 15             | 0      | 0      | 1      | 0      | 0      | 0      | 0      | 0      | 0      | 0      | 0      | 0      | 0      | 0      | 0      | 0      | 0      | 0      |
| Pyrococcus              | 1              | 10             | 0      | 0      | 0      | 0      | 0      | 0      | 0      | 0      | 0      | 0      | 0      | 0      | 0      | 0      | 0      | 1      | 0      | 1      |
| Pyrolobus               | 1              | 4              | 0      | 0      | 0      | 0      | 0      | 0      | 0      | 0      | 0      | 0      | 0      | 0      | 0      | 0      | 0      | 0      | 0      | 0      |
| Rahnella                | 2              | 143            | 1      | 1      | 1      | 1      | 0      | 0      | 0      | 0      | 0      | 0      | 0      | 1      | 1      | 0      | 0      | 1      | 0      | 0      |
| Ralstonia               | 3              | 332            | 1      | 1      | 0      | 0      | 1      | 1      | 1      | 1      | 1      | 0      | 1      | 1      | 1      | 1      | 1      | 1      | 1      | 0      |
| Ramlibacter             | 1              | 35             | 0      | 1      | 0      | 0      | 0      | 1      | 0      | 0      | 0      | 0      | 1      | 0      | 1      | 0      | 1      | 0      | 0      | 0      |
| Raoultella              | 2              | 139            | 1      | 1      | 1      | 1      | 0      | 1      | 0      | 0      | 0      | 0      | 1      | 1      | 1      | 0      | 0      | 1      | 0      | 0      |
| Raphidiopsis            | 1              | 5              | 0      | 0      | 0      | 0      | 0      | 0      | 0      | 0      | 0      | 0      | 0      | 0      | 0      | 0      | 0      | 0      | 0      | 0      |
| Reinekea                | 1              | 2              | 0      | 0      | 0      | 0      | 0      | 0      | 0      | 0      | 0      | 0      | 0      | 0      | 0      | 0      | 0      | 0      | 0      | 0      |
| Renibacterium           | 2              | 67             | 1      | 0      | 1      | 0      | 0      | 0      | 0      | 0      | 0      | 0      | 0      | 0      | 1      | 0      | 0      | 0      | 0      | 0      |
| Rhizobiaceae            | 1              | 3              | 0      | 0      | 0      | 0      | 0      | 0      | 0      | 0      | 0      | 0      | 0      | 0      | 0      | 0      | 0      | 0      | 0      | 0      |
| Rhizobiales             | 1              | 6              | 0      | 0      | 0      | 0      | 0      | 0      | 0      | 0      | 0      | 0      | 0      | 0      | 0      | 0      | 0      | 0      | 0      | 0      |
| Rhizobium               | 3              | 257            | 1      | 1      | 1      | 0      | 1      | 1      | 0      | 1      | 1      | 0      | 1      | 1      | 1      | 1      | 1      | 1      | 1      | 0      |
| Rhizobium/Agrobacterium | 2              | 87             | 1      | 1      | 0      | 0      | 0      | 1      | 0      | 0      | 0      | 0      | 1      | 0      | 0      | 0      | 0      | 0      | 1      | 0      |
| Rhodanobacter           | 1              | 21             | 1      | 1      | 1      | 0      | 0      | 0      | 0      | 1      | 0      | 0      | 0      | 0      | 1      | 0      | 0      | 1      | 0      | 0      |
| Rhodobacter             | 3              | 175            | 1      | 1      | 1      | 0      | 0      | 0      | 0      | 1      | 0      | 0      | 0      | 1      | 0      | 1      | 0      | 1      | 0      | 0      |
| Rhodobacteraceae        | 1              | 21             | 1      | 0      | 0      | 0      | 0      | 0      | 0      | 0      | 0      | 0      | 0      | 0      | 0      | 0      | 0      | 0      | 0      | 0      |
| Rhodobacterales         | 1              | 34             | 1      | 1      | 0      | 0      | 0      | 0      | 0      | 0      | 0      | 0      | 0      | 0      | 0      | 0      | 0      | 0      | 0      | 0      |
| Rhodococcus             | 2              | 292            | 1      | 0      | 0      | 0      | 0      | 0      | 0      | 1      | 1      | 0      | 1      | 0      | 1      | 1      | 1      | 0      | 0      | 0      |
| Rhodocyclaceae          | 1              | 7              | 0      | 0      | 0      | 0      | 0      | 0      | 0      | 0      | 0      | 0      | 0      | 0      | 0      | 0      | 0      | 0      | 0      | 0      |
| Rhodoferax              | 3              | 144            | 0      | 1      | 1      | 0      | 1      | 1      | 0      | 0      | 0      | 0      | 0      | 0      | 1      | 0      | 1      | 0      | 0      | 0      |
| Rhodomicrobium          | 2              | 103            | 0      | 1      | 0      | 0      | 0      | 0      | 0      | 0      | 0      | 0      | 0      | 0      | 0      | 0      | 0      | 1      | 0      | 0      |
| Rhodopirellula          | 2              | 87             | 1      | 0      | 1      | 0      | 0      | 0      | 0      | 0      | 0      | 0      | 1      | 0      | 1      | 1      | 1      | 1      | 0      | 0      |
| Rhodopseudomonas        | 3              | 246            | 0      | 1      | 0      | 0      | 0      | 1      | 1      | 1      | 1      | 0      | 1      | 1      | 1      | 1      | 1      | 1      | 0      | 0      |
| Rhodospirillum          | 2              | 121            | 0      | 1      | 1      | 0      | 0      | 0      | 1      | 0      | 0      | 0      | 1      | 0      | 1      | 0      | 0      | 1      | 1      | 0      |
| Rhodothermus            | 2              | 76             | 1      | 0      | 1      | 1      | 0      | 0      | 0      | 0      | 0      | 0      | 0      | 0      | 1      | 0      | 0      | 1      | 0      | 0      |
| Rhodovulum              | 1              | 4              | 0      | 0      | 0      | 0      | 0      | 0      | 0      | 0      | 0      | 0      | 0      | 0      | 0      | 0      | 0      | 0      | 0      | 0      |
| Richelia                | 1              | 2              | 0      | 0      | 0      | 0      | 0      | 0      | 0      | 0      | 0      | 0      | 0      | 0      | 0      | 0      | 0      | 0      | 0      | 0      |
| Rickettsia              | 2              | 43             | 0      | 1      | 0      | 0      | 0      | 0      | 0      | 0      | 0      | 0      | 0      | 0      | 0      | 0      | 0      | 0      | 0      | 0      |
| Rickettsiaceae          | 1              | 5              | 0      | 0      | 0      | 0      | 0      | 0      | 0      | 0      | 0      | 0      | 0      | 0      | 0      | 0      | 0      | 0      | 0      | 0      |
| Riemerella              | 2              | 61             | 1      | 0      | 1      | 1      | 0      | 0      | 0      | 0      | 0      | 0      | 0      | 0      | 0      | 0      | 0      | 1      | 0      | 0      |
| Rivularia               | 1              | 18             | 0      | 1      | 0      | 0      | 0      | 0      | 0      | 0      | 0      | 0      | 1      | 0      | 1      | 0      | 0      | 1      | 0      | 0      |
| Robiginitalea           | 2              | 83             | 0      | 0      | 1      | 1      | 0      | 0      | 0      | 0      | 0      | 0      | 1      | 0      | 1      | 0      | 0      | 0      | 0      | 0      |
| Roseburia               | 2              | 58             | 1      | 0      | 1      | 1      | 0      | 0      | 0      | 0      | 0      | 0      | 0      | 0      | 0      | 1      | 0      | 0      | 0      | 0      |
| Roseibium               | 1              | 3              | 0      | 0      | 0      | 0      | 0      | 0      | 0      | 0      | 0      | 0      | 0      | 0      | 0      | 0      | 0      | 0      | 0      | 0      |
| Roseiflexus             | 3              | 100            | 0      | 0      | 1      | 0      | 0      | 0      | 0      | 0      | 0      | 0      | 1      | 0      | 1      | 0      | 0      | 1      | 0      | 1      |
| Roseobacter             | 2              | 149            | 1      | 1      | 1      | 0      | 1      | 0      | 0      | 0      | 0      | 0      | 1      | 1      | 0      | 0      | 0      | 0      | 0      | 0      |
| Roseomonas              | 1              | 2              | 0      | 0      | 0      | 0      | 0      | 0      | 0      | 0      | 0      | 0      | 0      | 0      | 0      | 0      | 0      | 0      | 0      | 0      |
| Roseovarius             | 1              | 15             | 0      | 0      | 0      | 0      | 0      | 0      | 0      | 0      | 0      | 0      | 0      | 0      | 0      | 0      | 0      | 0      | 0      | 0      |
| Rothia                  | 1              | 44             | 1      | 0      | 0      | 0      | 0      | 0      | 0      | 0      | 0      | 0      | 0      | 0      | 0      | 0      | 0      | 0      | 0      | 0      |
| Rubrivivax              | 1              | 24             | 0      | 1      | 0      | 1      | 0      | 0      | 1      | 0      | 0      | 0      | 0      | 0      | 1      | 0      | 0      | 1      | 0      | 0      |
| Rubrobacter             | 3              | 117            | 1      | 1      | 1      | 0      | 0      | 0      | 0      | 1      | 0      | 0      | 0      | 1      | 0      | 0      | 0      | 1      | 0      | 0      |
| Ruegeria                | 2              | 189            | 1      | 1      | 1      | 0      | 0      | 0      | 0      | 0      | 0      | 0      | 1      | 1      | 0      | 1      | 1      | 0      | 0      | 0      |

| Genus             | Cluster Number | Protein Counts | K00760 | K00799 | K00857 | K00876 | K01026 | K01031 | K01034 | K01039 | K01041 | K01045 | K01053 | K01055 | K01061 | K01066 | K01075 | K01077 | K01078 | K01101 |
|-------------------|----------------|----------------|--------|--------|--------|--------|--------|--------|--------|--------|--------|--------|--------|--------|--------|--------|--------|--------|--------|--------|
| Ruminococcaceae   | 1              | 2              | 0      | 0      | 0      | 0      | 0      | 0      | 0      | 0      | 0      | 0      | 0      | 0      | 0      | 0      | 0      | 0      | 0      | 0      |
| Ruminococcus      | 2              | 101            | 1      | 0      | 1      | 1      | 1      | 0      | 0      | 0      | 0      | 0      | 0      | 0      | 0      | 0      | 0      | 0      | 0      | 0      |
| Runella           | 1              | 26             | 1      | 0      | 1      | 1      | 0      | 0      | 0      | 0      | 0      | 0      | 1      | 0      | 1      | 0      | 0      | 1      | 0      | 0      |
| Saccharomonospora | 2              | 132            | 1      | 0      | 1      | 0      | 0      | 0      | 0      | 1      | 0      | 0      | 0      | 1      | 1      | 0      | 0      | 0      | 0      | 0      |
| Saccharophagus    | 2              | 81             | 1      | 1      | 0      | 0      | 0      | 0      | 0      | 0      | 0      | 0      | 0      | 0      | 1      | 0      | 0      | 1      | 0      | 0      |
| Saccharopolyspora | 3              | 194            | 1      | 1      | 0      | 1      | 0      | 0      | 0      | 1      | 1      | 0      | 1      | 1      | 1      | 1      | 0      | 0      | 0      | 0      |
| Saccharothrix     | 1              | 32             | 1      | 0      | 0      | 1      | 0      | 0      | 0      | 1      | 0      | 0      | 0      | 1      | 1      | 0      | 0      | 0      | 0      | 0      |
| Sagittula         | 1              | 10             | 0      | 0      | 0      | 0      | 0      | 0      | 0      | 0      | 0      | 0      | 0      | 0      | 0      | 0      | 0      | 0      | 0      | 0      |
| Salinibacter      | 2              | 77             | 1      | 0      | 1      | 1      | 0      | 0      | 0      | 0      | 0      | 0      | 0      | 0      | 1      | 0      | 0      | 1      | 1      | 0      |
| Salinimonas       | 1              | 1              | 0      | 0      | 0      | 0      | 0      | 0      | 0      | 0      | 0      | 0      | 0      | 0      | 0      | 0      | 0      | 0      | 0      | 0      |
| Salinispora       | 3              | 127            | 1      | 0      | 1      | 1      | 0      | 0      | 0      | 0      | 1      | 0      | 1      | 0      | 1      | 0      | 0      | 1      | 0      | 0      |
| Salinivibrio      | 1              | 2              | 0      | 0      | 0      | 0      | 0      | 0      | 0      | 0      | 0      | 0      | 0      | 0      | 0      | 0      | 0      | 0      | 0      | 0      |
| Salmonella        | 2              | 151            | 1      | 1      | 1      | 1      | 0      | 0      | 0      | 0      | 0      | 0      | 0      | 0      | 1      | 1      | 0      | 0      | 0      | 0      |
| Sanguibacter      | 2              | 73             | 1      | 0      | 1      | 1      | 0      | 0      | 0      | 0      | 0      | 0      | 0      | 0      | 0      | 0      | 0      | 1      | 0      | 0      |
| Saprospira        | 1              | 13             | 1      | 0      | 1      | 1      | 0      | 0      | 0      | 0      | 0      | 0      | 0      | 0      | 0      | 0      | 0      | 0      | 0      | 0      |
| Scardovia         | 1              | 1              | 0      | 0      | 0      | 0      | 0      | 0      | 0      | 0      | 0      | 0      | 0      | 0      | 0      | 0      | 0      | 0      | 0      | 0      |
| Scytonema         | 1              | 10             | 0      | 0      | 0      | 0      | 0      | 0      | 0      | 0      | 0      | 0      | 0      | 0      | 0      | 0      | 0      | 0      | 0      | 0      |
| Sebaldella        | 2              | 69             | 1      | 0      | 1      | 1      | 0      | 0      | 0      | 0      | 0      | 0      | 0      | 0      | 0      | 0      | 0      | 1      | 0      | 0      |
| Segniliparus      | 2              | 85             | 1      | 0      | 0      | 0      | 0      | 0      | 0      | 0      | 0      | 0      | 0      | 0      | 1      | 0      | 0      | 0      | 0      | 0      |
| Selenomonas       | 2              | 57             | 1      | 0      | 0      | 1      | 0      | 0      | 0      | 0      | 0      | 0      | 0      | 0      | 0      | 0      | 0      | 0      | 0      | 0      |
| Serinicoccus      | 1              | 1              | 0      | 0      | 0      | 0      | 0      | 0      | 0      | 0      | 0      | 0      | 0      | 0      | 0      | 0      | 0      | 0      | 0      | 0      |
| Serratia          | 2              | 186            | 1      | 1      | 1      | 1      | 0      | 1      | 0      | 0      | 0      | 0      | 1      | 1      | 1      | 1      | 0      | 1      | 0      | 0      |
| Shewanella        | 3              | 214            | 1      | 1      | 1      | 1      | 1      | 1      | 0      | 1      | 0      | 0      | 0      | 0      | 1      | 1      | 0      | 1      | 0      | 0      |
| Shigella          | 2              | 172            | 1      | 1      | 1      | 1      | 0      | 0      | 1      | 0      | 0      | 0      | 0      | 0      | 1      | 1      | 0      | 1      | 0      | 0      |
| Shinella          | 1              | 2              | 0      | 0      | 0      | 0      | 0      | 0      | 0      | 0      | 0      | 0      | 0      | 0      | 0      | 0      | 0      | 0      | 0      | 0      |
| Sideroxydans      | 2              | 81             | 1      | 1      | 0      | 0      | 0      | 0      | 0      | 0      | 0      | 0      | 0      | 0      | 0      | 0      | 0      | 0      | 0      | 0      |
| Silicibacter      | 2              | 105            | 1      | 1      | 0      | 0      | 0      | 0      | 0      | 0      | 0      | 0      | 0      | 0      | 0      | 0      | 0      | 0      | 0      | 0      |
| Simiduia          | 1              | 18             | 1      | 1      | 0      | 0      | 0      | 0      | 0      | 0      | 0      | 0      | 1      | 0      | 1      | 0      | 0      | 1      | 0      | 0      |
| Simkania          | 1              | 6              | 1      | 0      | 1      | 1      | 0      | 0      | 0      | 0      | 0      | 0      | 0      | 0      | 0      | 0      | 0      | 0      | 0      | 0      |
| Simonsiella       | 1              | 2              | 0      | 0      | 0      | 0      | 0      | 0      | 0      | 0      | 0      | 0      | 0      | 0      | 0      | 0      | 0      | 0      | 0      | 0      |
| Singulisphaera    | 1              | 18             | 1      | 0      | 0      | 0      | 0      | 0      | 0      | 0      | 0      | 0      | 1      | 0      | 1      | 0      | 0      | 1      | 0      | 0      |
| Sinorhizobium     | 3              | 207            | 1      | 1      | 1      | 0      | 0      | 1      | 0      | 1      | 1      | 0      | 1      | 1      | 1      | 0      | 0      | 1      | 0      | 0      |
| Slackia           | 2              | 46             | 1      | 0      | 0      | 0      | 0      | 0      | 0      | 0      | 0      | 0      | 0      | 0      | 0      | 0      | 0      | 0      | 0      | 0      |
| Smaragdicoccus    | 1              | 3              | 0      | 0      | 0      | 0      | 0      | 0      | 0      | 0      | 0      | 0      | 0      | 0      | 0      | 0      | 0      | 0      | 0      | 0      |
| Sodalis           | 2              | 71             | 1      | 0      | 1      | 1      | 0      | 0      | 0      | 0      | 0      | 0      | 0      | 0      | 0      | 0      | 0      | 0      | 0      | 0      |
| Solibacillus      | 1              | 23             | 1      | 0      | 1      | 1      | 0      | 0      | 0      | 0      | 0      | 0      | 0      | 0      | 0      | 0      | 0      | 1      | 0      | 0      |
| Solitaea          | 1              | 13             | 1      | 0      | 1      | 1      | 0      | 0      | 0      | 0      | 0      | 0      | 0      | 0      | 1      | 0      | 0      | 0      | 0      | 0      |
| Sorangium         | 3              | 115            | 1      | 1      | 0      | 0      | 0      | 0      | 0      | 0      | 0      | 0      | 1      | 0      | 1      | 0      | 1      | 0      | 1      | 0      |
| Sphaerobacter     | 2              | 100            | 1      | 0      | 0      | 0      | 0      | 0      | 0      | 1      | 0      | 0      | 0      | 0      | 1      | 0      | 0      | 0      | 0      | 1      |
| Sphaerochaeta     | 1              | 42             | 1      | 0      | 1      | 1      | 0      | 0      | 0      | 0      | 0      | 0      | 0      | 0      | 0      | 0      | 0      | 1      | 0      | 0      |
| Sphingobacterium  | 3              | 85             | 1      | 0      | 1      | 1      | 0      | 0      | 0      | 0      | 0      | 0      | 1      | 0      | 1      | 0      | 0      | 1      | 0      | 0      |
| Sphingobium       | 1              | 179            | 0      | 1      | 1      | 0      | 0      | 1      | 0      | 0      | 0      | 0      | 1      | 1      | 1      | 0      | 1      | 1      | 0      | 0      |
| Sphingomonadaceae | 1              | 15             | 0      | 0      | 0      | 0      | 0      | 0      | 0      | 0      | 0      | 0      | 0      | 0      | 0      | 0      | 0      | 0      | 0      | 0      |
| Sphingomonas      | 2              | 220            | 0      | 1      | 1      | 0      | 0      | 1      | 0      | 1      | 0      | 0      | 0      | 1      | 1      | 1      | 1      | 0      | 0      | 0      |
| Sphingopyxis      | 3              | 99             | 0      | 1      | 1      | 0      | 0      | 0      | 0      | 0      | 0      | 0      | 1      | 0      | 1      | 0      | 0      | 0      | 0      | 0      |
| Spirochaeta       | 2              | 103            | 1      | 0      | 1      | 1      | 0      | 0      | 0      | 0      | 0      | 0      | 0      | 0      | 0      | 0      | 0      | 1      | 0      | 1      |
| Spiroplasma       | 1              | 6              | 1      | 0      | 1      | 1      | 0      | 0      | 0      | 0      | 0      | 0      | 0      | 0      | 0      | 0      | 0      | 0      | 0      | 0      |
| Spirosoma         | 2              | 107            | 1      | 0      | 1      | 1      | 0      | 0      | 0      | 0      | 0      | 0      | 1      | 0      | 1      | 0      | 0      | 0      | 0      | 0      |
| Stackebrandtia    | 2              | 110            | 1      | 0      | 0      | 1      | 0      | 0      | 0      | 1      | 0      | 0      | 1      | 1      | 1      | 0      | 0      | 0      | 0      | 0      |
| Stanieria         | 1              | 17             | 0      | 1      | 0      | 0      | 0      | 0      | 0      | 0      | 0      | 0      | 1      | 0      | 1      | 0      | 0      | 0      | 0      | 0      |
| Staphylococcus    | 2              | 108            | 1      | 1      | 1      | 1      | 1      | 0      | 0      | 0      | 0      | 0      | 0      | 0      | 0      | 0      | 0      | 1      | 0      | 1      |
| Staphylothermus   | 1              | 12             | 0      | 0      | 0      | 0      | 0      | 0      | 0      | 0      | 0      | 0      | 0      | 0      | 0      | 0      | 0      | 0      | 0      | 1      |



| Genus                  | Cluster Number | Protein Counts | K00760 | K00799 | K00857 | K00876 | K01026 | K01031 | K01034 | K01039 | K01041 | K01045 | K01053 | K01055 | K01061 | K01066 | K01075 | K01077 | K01078 | K01101 |
|------------------------|----------------|----------------|--------|--------|--------|--------|--------|--------|--------|--------|--------|--------|--------|--------|--------|--------|--------|--------|--------|--------|
| Stappia                | 1              | 2              | 0      | 0      | 0      | 0      | 0      | 0      | 0      | 0      | 0      | 0      | 0      | 0      | 0      | 0      | 0      | 0      | 0      | 0      |
| Starkeya               | 3              | 134            | 1      | 1      | 0      | 0      | 0      | 0      | 0      | 1      | 0      | 0      | 1      | 1      | 1      | 0      | 0      | 0      | 0      | 0      |
| Stenotrophomonas       | 3              | 104            | 1      | 1      | 1      | 0      | 0      | 0      | 0      | 0      | 0      | 0      | 0      | 0      | 1      | 0      | 0      | 1      | 1      | 0      |
| Stigmatella            | 3              | 129            | 1      | 1      | 1      | 1      | 0      | 0      | 0      | 1      | 0      | 0      | 0      | 0      | 1      | 0      | 0      | 0      | 0      | 0      |
| Streptobacillus        | 1              | 38             | 1      | 0      | 1      | 1      | 0      | 0      | 0      | 0      | 0      | 0      | 0      | 0      | 0      | 0      | 0      | 0      | 0      | 0      |
| Streptococcus          | 2              | 121            | 1      | 1      | 1      | 1      | 1      | 0      | 1      | 0      | 0      | 0      | 0      | 0      | 0      | 1      | 0      | 1      | 1      | 1      |
| Streptomyces           | 2              | 253            | 1      | 0      | 1      | 1      | 0      | 1      | 0      | 1      | 1      | 0      | 1      | 0      | 1      | 0      | 0      | 1      | 0      | 0      |
| Streptosporangium      | 3              | 148            | 1      | 0      | 1      | 0      | 0      | 0      | 0      | 1      | 1      | 0      | 1      | 1      | 1      | 0      | 0      | 0      | 0      | 0      |
| Strigomonas            | 1              | 2              | 0      | 0      | 0      | 0      | 0      | 0      | 0      | 0      | 0      | 0      | 0      | 0      | 0      | 0      | 0      | 0      | 0      | 0      |
| Sulfitobacter          | 1              | 10             | 0      | 0      | 0      | 0      | 0      | 0      | 0      | 0      | 0      | 0      | 0      | 0      | 0      | 0      | 0      | 0      | 0      | 0      |
| Sulfobacillus          | 1              | 30             | 1      | 0      | 1      | 0      | 0      | 0      | 0      | 1      | 0      | 0      | 0      | 1      | 1      | 0      | 0      | 0      | 0      | 0      |
| Sulfolobus             | 1              | 23             | 0      | 0      | 0      | 0      | 0      | 0      | 0      | 1      | 0      | 0      | 0      | 0      | 1      | 0      | 0      | 0      | 0      | 1      |
| Sulfuricurvum          | 2              | 67             | 0      | 0      | 0      | 0      | 0      | 0      | 0      | 0      | 0      | 0      | 0      | 0      | 0      | 0      | 0      | 0      | 0      | 0      |
| Sulfurihydrogenibium   | 2              | 55             | 1      | 0      | 0      | 0      | 0      | 0      | 0      | 0      | 0      | 0      | 0      | 0      | 0      | 0      | 0      | 0      | 0      | 0      |
| Sulfurimonas           | 2              | 60             | 0      | 0      | 0      | 0      | 0      | 0      | 0      | 0      | 0      | 0      | 0      | 0      | 0      | 0      | 0      | 0      | 0      | 0      |
| Sulfurospirillum       | 1              | 48             | 0      | 0      | 0      | 0      | 0      | 0      | 0      | 0      | 0      | 0      | 0      | 0      | 0      | 0      | 0      | 0      | 0      | 0      |
| Sulfurovum             | 2              | 48             | 0      | 0      | 0      | 0      | 0      | 0      | 0      | 0      | 0      | 0      | 0      | 0      | 0      | 0      | 0      | 1      | 0      | 0      |
| Symbiobacterium        | 2              | 68             | 1      | 0      | 1      | 1      | 0      | 0      | 0      | 0      | 0      | 0      | 0      | 1      | 0      | 0      | 0      | 0      | 0      | 0      |
| Synechococcus          | 1              | 34             | 0      | 1      | 0      | 1      | 0      | 0      | 0      | 0      | 0      | 0      | 1      | 0      | 1      | 1      | 0      | 1      | 0      | 0      |
| Synechocystis          | 1              | 40             | 0      | 1      | 0      | 0      | 0      | 0      | 0      | 0      | 0      | 0      | 0      | 0      | 1      | 0      | 0      | 0      | 0      | 0      |
| Synergistetes          | 1              | 27             | 1      | 0      | 0      | 1      | 0      | 0      | 0      | 0      | 0      | 0      | 0      | 0      | 0      | 0      | 0      | 0      | 0      | 0      |
| Syntrophobacter        | 2              | 101            | 1      | 0      | 0      | 0      | 1      | 0      | 0      | 1      | 1      | 0      | 0      | 1      | 0      | 0      | 0      | 0      | 0      | 0      |
| Syntrophobotulus       | 2              | 71             | 1      | 0      | 0      | 0      | 0      | 0      | 0      | 0      | 0      | 0      | 0      | 1      | 0      | 0      | 0      | 1      | 0      | 0      |
| Syntrophomonas         | 2              | 58             | 1      | 0      | 1      | 1      | 0      | 0      | 0      | 0      | 1      | 0      | 0      | 0      | 0      | 0      | 0      | 0      | 0      | 0      |
| Syntrophothermus       | 2              | 60             | 1      | 0      | 0      | 0      | 0      | 0      | 0      | 1      | 0      | 0      | 0      | 0      | 0      | 0      | 0      | 0      | 0      | 0      |
| Syntrophus             | 2              | 66             | 1      | 0      | 0      | 0      | 1      | 0      | 0      | 0      | 0      | 0      | 0      | 0      | 0      | 0      | 0      | 0      | 0      | 0      |
| Tannerella             | 1              | 8              | 1      | 0      | 0      | 1      | 0      | 0      | 0      | 0      | 0      | 0      | 0      | 0      | 0      | 0      | 0      | 1      | 0      | 0      |
| Taylorella             | 1              | 43             | 0      | 1      | 0      | 0      | 0      | 0      | 0      | 0      | 0      | 0      | 0      | 0      | 0      | 0      | 0      | 1      | 0      | 0      |
| Tepidanaerobacter      | 2              | 55             | 1      | 0      | 1      | 1      | 1      | 0      | 0      | 0      | 0      | 0      | 0      | 0      | 0      | 0      | 0      | 1      | 0      | 0      |
| Teredinibacter         | 2              | 109            | 1      | 1      | 0      | 0      | 0      | 0      | 0      | 0      | 0      | 0      | 1      | 0      | 0      | 0      | 1      | 1      | 0      | 0      |
| Terrabacter            | 1              | 1              | 0      | 0      | 0      | 0      | 0      | 0      | 0      | 0      | 0      | 0      | 0      | 0      | 0      | 0      | 0      | 0      | 0      | 0      |
| Terriglobus            | 2              | 83             | 1      | 0      | 1      | 1      | 0      | 0      | 0      | 0      | 0      | 0      | 1      | 0      | 1      | 0      | 0      | 0      | 0      | 0      |
| Tetragenococcus        | 1              | 12             | 1      | 0      | 1      | 1      | 0      | 0      | 0      | 0      | 0      | 0      | 0      | 0      | 0      | 0      | 0      | 0      | 0      | 1      |
| Thalassiobium          | 1              | 11             | 0      | 0      | 0      | 0      | 0      | 0      | 0      | 0      | 0      | 0      | 0      | 0      | 0      | 0      | 0      | 0      | 0      | 0      |
| Thalassobacter         | 1              | 9              | 0      | 0      | 0      | 0      | 0      | 0      | 0      | 0      | 0      | 0      | 0      | 0      | 0      | 0      | 0      | 0      | 0      | 0      |
| Thalassolithuus        | 1              | 12             | 1      | 1      | 0      | 0      | 0      | 0      | 0      | 0      | 0      | 0      | 0      | 0      | 0      | 0      | 0      | 1      | 0      | 0      |
| Thalassospira          | 1              | 2              | 0      | 0      | 0      | 0      | 0      | 0      | 0      | 0      | 0      | 0      | 0      | 0      | 0      | 0      | 0      | 0      | 0      | 0      |
| Thauera                | 1              | 111            | 1      | 1      | 0      | 0      | 1      | 0      | 0      | 0      | 0      | 0      | 0      | 0      | 1      | 0      | 1      | 0      | 0      | 0      |
| Thermacetogenium       | 1              | 7              | 1      | 0      | 0      | 0      | 0      | 0      | 0      | 0      | 0      | 0      | 0      | 0      | 0      | 0      | 0      | 0      | 0      | 0      |
| Thermaerobacter        | 2              | 79             | 1      | 0      | 1      | 1      | 0      | 0      | 0      | 0      | 0      | 0      | 0      | 0      | 0      | 0      | 0      | 0      | 0      | 0      |
| Thermanaerovibrio      | 2              | 58             | 1      | 0      | 0      | 1      | 0      | 0      | 0      | 0      | 0      | 0      | 0      | 0      | 0      | 0      | 0      | 1      | 0      | 0      |
| Thermincola            | 2              | 62             | 1      | 0      | 0      | 0      | 0      | 0      | 0      | 0      | 0      | 0      | 0      | 0      | 0      | 0      | 0      | 0      | 0      | 0      |
| Thermoanaerobacter     | 2              | 76             | 1      | 0      | 1      | 1      | 0      | 0      | 1      | 0      | 0      | 0      | 0      | 0      | 0      | 0      | 0      | 0      | 0      | 0      |
| Thermoanaerobacterium  | 2              | 64             | 1      | 0      | 1      | 1      | 0      | 0      | 0      | 0      | 0      | 0      | 0      | 0      | 0      | 0      | 0      | 0      | 0      | 0      |
| Thermobacillus         | 1              | 11             | 1      | 0      | 0      | 0      | 0      | 0      | 0      | 0      | 0      | 0      | 0      | 0      | 0      | 0      | 0      | 0      | 0      | 0      |
| Thermobaculum          | 2              | 62             | 1      | 0      | 0      | 0      | 0      | 0      | 0      | 0      | 0      | 0      | 1      | 0      | 1      | 0      | 0      | 1      | 0      | 1      |
| Thermobifida           | 2              | 72             | 1      | 0      | 0      | 0      | 0      | 0      | 0      | 0      | 0      | 0      | 0      | 1      | 0      | 0      | 0      | 0      | 0      | 0      |
| Thermobispora          | 2              | 109            | 1      | 0      | 0      | 0      | 0      | 0      | 0      | 1      | 0      | 0      | 0      | 0      | 1      | 0      | 0      | 0      | 0      | 0      |
| Thermococcus           | 1              | 13             | 0      | 0      | 1      | 0      | 0      | 0      | 0      | 0      | 0      | 0      | 0      | 0      | 0      | 0      | 0      | 0      | 0      | 1      |
| Thermocrinis           | 2              | 60             | 1      | 0      | 0      | 0      | 0      | 0      | 0      | 0      | 0      | 0      | 0      | 0      | 1      | 0      | 0      | 0      | 0      | 1      |
| Thermodesulfator       | 1              | 10             | 1      | 0      | 0      | 0      | 0      | 0      | 0      | 0      | 0      | 0      | 0      | 0      | 0      | 0      | 0      | 1      | 0      | 0      |
| Thermodesulfobacterium | 1              | 9              | 1      | 0      | 0      | 0      | 0      | 0      | 0      | 0      | 0      | 0      | 0      | 0      | 0      | 0      | 0      | 0      | 0      | 0      |

| Genus                       | Cluster Number | Protein Counts | K00760 | K00799 | K00857 | K00876 | K01026 | K01031 | K01034 | K01039 | K01041 | K01045 | K01053 | K01055 | K01061 | K01066 | K01075 | K01077 | K01078 | K01101 |
|-----------------------------|----------------|----------------|--------|--------|--------|--------|--------|--------|--------|--------|--------|--------|--------|--------|--------|--------|--------|--------|--------|--------|
| <i>Thermodesulfobium</i>    | 1              | 13             | 1      | 0      | 0      | 0      | 0      | 0      | 0      | 0      | 0      | 0      | 0      | 0      | 0      | 0      | 0      | 1      | 0      | 0      |
| <i>Thermodesulfovibrio</i>  | 2              | 60             | 1      | 0      | 0      | 0      | 0      | 0      | 0      | 0      | 0      | 0      | 0      | 0      | 0      | 0      | 0      | 1      | 0      | 0      |
| <i>Thermofilum</i>          | 1              | 9              | 0      | 0      | 0      | 0      | 0      | 0      | 0      | 0      | 0      | 0      | 0      | 0      | 0      | 0      | 0      | 0      | 0      | 0      |
| <i>Thermogladus</i>         | 1              | 7              | 0      | 0      | 0      | 0      | 0      | 0      | 0      | 0      | 0      | 0      | 0      | 0      | 0      | 0      | 0      | 0      | 0      | 0      |
| <i>Thermomicrobium</i>      | 2              | 92             | 1      | 0      | 0      | 0      | 0      | 1      | 0      | 0      | 0      | 0      | 0      | 0      | 0      | 0      | 0      | 0      | 0      | 1      |
| <i>Thermomonospora</i>      | 2              | 125            | 1      | 0      | 0      | 0      | 0      | 0      | 0      | 0      | 1      | 0      | 0      | 0      | 1      | 0      | 0      | 0      | 0      | 0      |
| <i>Thermoplasma</i>         | 1              | 11             | 0      | 0      | 1      | 0      | 0      | 0      | 0      | 0      | 0      | 0      | 0      | 0      | 1      | 0      | 0      | 0      | 0      | 0      |
| <i>Thermoplasmatales</i>    | 1              | 6              | 0      | 0      | 0      | 0      | 0      | 0      | 0      | 0      | 0      | 0      | 0      | 0      | 0      | 0      | 0      | 0      | 0      | 0      |
| <i>Thermoproteus</i>        | 1              | 12             | 0      | 0      | 1      | 0      | 0      | 0      | 0      | 0      | 0      | 0      | 0      | 0      | 0      | 0      | 0      | 0      | 0      | 0      |
| <i>Thermosediminibacter</i> | 2              | 64             | 1      | 0      | 0      | 1      | 0      | 0      | 0      | 0      | 0      | 0      | 0      | 0      | 0      | 0      | 0      | 0      | 0      | 0      |
| <i>Thermosipho</i>          | 2              | 70             | 1      | 0      | 1      | 1      | 0      | 0      | 1      | 0      | 0      | 0      | 0      | 0      | 0      | 0      | 0      | 1      | 0      | 0      |
| <i>Thermosphaera</i>        | 1              | 10             | 0      | 0      | 0      | 0      | 0      | 0      | 0      | 0      | 0      | 0      | 0      | 0      | 0      | 0      | 0      | 0      | 0      | 0      |
| <i>Thermosynechococcus</i>  | 1              | 6              | 0      | 1      | 0      | 0      | 0      | 0      | 0      | 0      | 0      | 0      | 0      | 0      | 1      | 0      | 0      | 0      | 0      | 0      |
| <i>Thermotoga</i>           | 2              | 80             | 1      | 0      | 1      | 1      | 0      | 0      | 1      | 0      | 0      | 0      | 0      | 0      | 0      | 0      | 0      | 1      | 0      | 0      |
| <i>Thermovibrio</i>         | 2              | 58             | 1      | 0      | 0      | 0      | 0      | 0      | 0      | 0      | 0      | 0      | 0      | 0      | 0      | 0      | 0      | 0      | 0      | 0      |
| <i>Thermovirga</i>          | 1              | 9              | 1      | 0      | 0      | 1      | 0      | 0      | 0      | 0      | 0      | 0      | 0      | 0      | 0      | 0      | 0      | 0      | 0      | 0      |
| <i>Thermus</i>              | 2              | 107            | 1      | 0      | 1      | 1      | 0      | 0      | 0      | 0      | 0      | 0      | 0      | 1      | 0      | 0      | 0      | 1      | 1      | 0      |
| <i>Thioalkalimicrobium</i>  | 1              | 4              | 0      | 1      | 0      | 0      | 0      | 0      | 0      | 0      | 0      | 0      | 0      | 0      | 0      | 0      | 0      | 0      | 0      | 0      |
| <i>Thioalkalivibrio</i>     | 2              | 91             | 1      | 1      | 0      | 0      | 0      | 0      | 0      | 0      | 0      | 0      | 0      | 0      | 1      | 0      | 0      | 0      | 0      | 0      |
| <i>Thiobaca</i>             | 1              | 2              | 0      | 0      | 0      | 0      | 0      | 0      | 0      | 0      | 0      | 0      | 0      | 0      | 0      | 0      | 0      | 0      | 0      | 0      |
| <i>Thiobacillus</i>         | 2              | 67             | 1      | 1      | 0      | 0      | 0      | 0      | 0      | 0      | 0      | 0      | 0      | 0      | 0      | 0      | 0      | 0      | 0      | 0      |
| <i>Thiocapsa</i>            | 1              | 2              | 0      | 0      | 0      | 0      | 0      | 0      | 0      | 0      | 0      | 0      | 0      | 0      | 0      | 0      | 0      | 0      | 0      | 0      |
| <i>Thiocystis</i>           | 1              | 11             | 1      | 0      | 0      | 0      | 0      | 0      | 0      | 0      | 0      | 0      | 0      | 0      | 0      | 0      | 0      | 0      | 0      | 0      |
| <i>Thioflavococcus</i>      | 1              | 13             | 1      | 0      | 0      | 0      | 0      | 0      | 0      | 0      | 0      | 0      | 0      | 0      | 0      | 0      | 0      | 1      | 0      | 0      |
| <i>Thiomicrospira</i>       | 2              | 50             | 0      | 1      | 0      | 0      | 0      | 0      | 0      | 0      | 0      | 0      | 0      | 0      | 0      | 0      | 0      | 0      | 0      | 0      |
| <i>Thiomonas</i>            | 2              | 85             | 0      | 1      | 0      | 0      | 0      | 0      | 0      | 0      | 0      | 0      | 0      | 0      | 1      | 0      | 0      | 0      | 0      | 0      |
| <i>Thiorhodococcus</i>      | 1              | 2              | 0      | 0      | 0      | 0      | 0      | 0      | 0      | 0      | 0      | 0      | 0      | 0      | 0      | 0      | 0      | 0      | 0      | 0      |
| <i>Thiothrix</i>            | 1              | 2              | 0      | 0      | 0      | 0      | 0      | 0      | 0      | 0      | 0      | 0      | 0      | 0      | 0      | 0      | 0      | 0      | 0      | 0      |
| <i>Tistrella</i>            | 1              | 42             | 1      | 1      | 0      | 0      | 0      | 1      | 0      | 0      | 0      | 0      | 1      | 1      | 1      | 0      | 0      | 0      | 0      | 0      |
| <i>Tolumonas</i>            | 2              | 100            | 1      | 1      | 0      | 1      | 0      | 0      | 0      | 0      | 0      | 0      | 0      | 0      | 1      | 0      | 0      | 1      | 0      | 0      |
| <i>Transposon</i>           | 1              | 2              | 0      | 0      | 0      | 0      | 0      | 0      | 0      | 0      | 0      | 0      | 0      | 0      | 0      | 0      | 0      | 0      | 0      | 0      |
| <i>Treponema</i>            | 1              | 63             | 0      | 0      | 0      | 1      | 0      | 0      | 0      | 0      | 0      | 0      | 0      | 0      | 1      | 0      | 0      | 1      | 0      | 0      |
| <i>Trichodesmium</i>        | 2              | 71             | 0      | 1      | 0      | 0      | 0      | 0      | 0      | 0      | 0      | 0      | 0      | 0      | 1      | 0      | 0      | 0      | 0      | 0      |
| <i>Trichormus</i>           | 1              | 12             | 0      | 1      | 0      | 0      | 0      | 0      | 0      | 0      | 0      | 0      | 0      | 0      | 0      | 0      | 0      | 0      | 0      | 0      |
| <i>Tropheryma</i>           | 2              | 22             | 1      | 0      | 0      | 0      | 0      | 0      | 0      | 0      | 0      | 0      | 0      | 0      | 0      | 0      | 0      | 0      | 0      | 0      |
| <i>Truepera</i>             | 2              | 104            | 1      | 0      | 1      | 1      | 0      | 0      | 0      | 0      | 0      | 0      | 0      | 0      | 1      | 0      | 0      | 1      | 0      | 1      |
| <i>Tsukamurella</i>         | 2              | 123            | 1      | 0      | 0      | 0      | 1      | 1      | 0      | 0      | 1      | 0      | 0      | 0      | 0      | 0      | 0      | 1      | 0      | 0      |
| <i>Turneriella</i>          | 1              | 16             | 1      | 1      | 1      | 1      | 0      | 0      | 0      | 0      | 0      | 0      | 0      | 0      | 1      | 0      | 0      | 0      | 0      | 0      |
| <i>Uliginosibacterium</i>   | 1              | 2              | 0      | 0      | 0      | 0      | 0      | 0      | 0      | 0      | 0      | 0      | 0      | 0      | 0      | 0      | 0      | 0      | 0      | 0      |
| <i>Ureaplasma</i>           | 1              | 24             | 1      | 0      | 1      | 1      | 0      | 0      | 0      | 0      | 0      | 0      | 0      | 0      | 0      | 0      | 0      | 0      | 0      | 0      |
| <i>Ureibacillus</i>         | 1              | 2              | 0      | 0      | 0      | 0      | 0      | 0      | 0      | 0      | 0      | 0      | 0      | 0      | 0      | 0      | 0      | 0      | 0      | 0      |
| <i>Variovorax</i>           | 3              | 187            | 0      | 1      | 0      | 0      | 0      | 1      | 0      | 0      | 0      | 0      | 1      | 1      | 1      | 0      | 1      | 0      | 0      | 0      |
| <i>Veillonella</i>          | 1              | 54             | 1      | 0      | 0      | 0      | 0      | 0      | 0      | 0      | 0      | 0      | 0      | 0      | 0      | 0      | 0      | 0      | 0      | 0      |
| <i>Verminephrobacter</i>    | 3              | 188            | 0      | 1      | 0      | 0      | 0      | 1      | 0      | 1      | 0      | 0      | 1      | 0      | 1      | 0      | 0      | 0      | 0      | 0      |
| <i>Verrucosispora</i>       | 3              | 126            | 1      | 0      | 1      | 1      | 0      | 0      | 0      | 1      | 0      | 0      | 0      | 1      | 1      | 0      | 0      | 0      | 0      | 0      |
| <i>Vibrio</i>               | 2              | 195            | 1      | 1      | 1      | 1      | 1      | 0      | 0      | 1      | 0      | 0      | 0      | 1      | 1      | 0      | 0      | 1      | 0      | 0      |
| <i>Vibrionales</i>          | 1              | 46             | 1      | 0      | 1      | 1      | 0      | 0      | 0      | 0      | 0      | 0      | 0      | 0      | 0      | 0      | 0      | 0      | 0      | 0      |
| <i>Vitreoscilla</i>         | 1              | 1              | 0      | 0      | 0      | 0      | 0      | 0      | 0      | 0      | 0      | 0      | 0      | 0      | 0      | 0      | 0      | 0      | 0      | 0      |
| <i>Vulcanisaeta</i>         | 1              | 14             | 0      | 0      | 0      | 0      | 0      | 0      | 0      | 1      | 0      | 0      | 0      | 0      | 0      | 0      | 0      | 0      | 0      | 0      |
| <i>Waddlia</i>              | 2              | 68             | 0      | 0      | 1      | 1      | 0      | 0      | 0      | 0      | 0      | 0      | 0      | 0      | 0      | 0      | 0      | 0      | 0      | 0      |
| <i>Wautersia</i>            | 1              | 2              | 0      | 0      | 0      | 0      | 0      | 0      | 0      | 0      | 0      | 0      | 0      | 0      | 0      | 0      | 0      | 0      | 0      | 0      |
| <i>Weeksella</i>            | 2              | 65             | 1      | 0      | 1      | 1      | 0      | 0      | 0      | 0      | 0      | 0      | 0      | 0      | 0      | 0      | 0      | 0      | 0      | 0      |

| Genus             | Cluster Number | Protein Counts | K00760 | K00799 | K00857 | K00876 | K01026 | K01031 | K01034 | K01039 | K01041 | K01045 | K01053 | K01055 | K01061 | K01066 | K01075 | K01077 | K01078 | K01101 |
|-------------------|----------------|----------------|--------|--------|--------|--------|--------|--------|--------|--------|--------|--------|--------|--------|--------|--------|--------|--------|--------|--------|
| Weissella         | 1              | 14             | 1      | 0      | 1      | 1      | 0      | 0      | 0      | 0      | 0      | 0      | 0      | 0      | 0      | 0      | 0      | 0      | 0      | 1      |
| Wenxinia          | 1              | 2              | 0      | 0      | 0      | 0      | 0      | 0      | 0      | 0      | 0      | 0      | 0      | 0      | 0      | 0      | 0      | 0      | 0      | 0      |
| Wigglesworthia    | 1              | 29             | 0      | 0      | 0      | 0      | 0      | 0      | 0      | 0      | 0      | 0      | 0      | 0      | 0      | 0      | 0      | 0      | 0      | 0      |
| Wolbachia         | 1              | 32             | 0      | 1      | 0      | 0      | 0      | 0      | 0      | 0      | 0      | 0      | 0      | 0      | 0      | 0      | 0      | 0      | 0      | 0      |
| Wolinella         | 2              | 51             | 0      | 0      | 0      | 0      | 0      | 0      | 0      | 0      | 0      | 0      | 0      | 0      | 0      | 0      | 0      | 0      | 0      | 0      |
| Xanthobacter      | 3              | 176            | 1      | 1      | 0      | 0      | 0      | 1      | 0      | 1      | 0      | 0      | 1      | 1      | 1      | 0      | 0      | 0      | 0      | 0      |
| Xanthobacteraceae | 1              | 4              | 0      | 0      | 0      | 0      | 0      | 0      | 0      | 0      | 0      | 0      | 0      | 0      | 0      | 0      | 0      | 0      | 0      | 0      |
| Xanthomonadaceae  | 1              | 39             | 1      | 1      | 0      | 0      | 0      | 0      | 0      | 0      | 0      | 0      | 0      | 0      | 0      | 0      | 0      | 0      | 1      | 0      |
| Xanthomonas       | 2              | 162            | 1      | 1      | 1      | 0      | 0      | 1      | 0      | 1      | 0      | 0      | 1      | 1      | 1      | 1      | 0      | 1      | 1      | 0      |
| Xenorhabdus       | 2              | 127            | 1      | 1      | 1      | 1      | 0      | 0      | 0      | 0      | 0      | 0      | 0      | 0      | 0      | 0      | 0      | 0      | 0      | 0      |
| Xylanimonas       | 2              | 66             | 1      | 0      | 1      | 1      | 0      | 0      | 0      | 0      | 0      | 0      | 0      | 0      | 0      | 0      | 0      | 0      | 0      | 0      |
| Xylella           | 2              | 52             | 1      | 1      | 0      | 0      | 0      | 0      | 0      | 0      | 0      | 0      | 1      | 0      | 0      | 1      | 0      | 1      | 0      | 0      |
| Yersinia          | 2              | 145            | 1      | 1      | 1      | 1      | 0      | 0      | 0      | 0      | 0      | 0      | 0      | 0      | 1      | 0      | 0      | 1      | 0      | 0      |
| Yokenella         | 2              | 61             | 1      | 0      | 0      | 1      | 0      | 0      | 0      | 0      | 0      | 0      | 0      | 0      | 0      | 0      | 0      | 0      | 0      | 0      |
| Zobellia          | 1              | 28             | 0      | 0      | 1      | 1      | 0      | 0      | 0      | 0      | 0      | 0      | 1      | 0      | 0      | 0      | 0      | 1      | 0      | 0      |
| Zunongwangia      | 2              | 98             | 1      | 0      | 1      | 1      | 0      | 0      | 0      | 0      | 0      | 0      | 1      | 0      | 0      | 0      | 0      | 1      | 0      | 0      |
| Zymomonas         | 2              | 67             | 0      | 1      | 1      | 0      | 0      | 0      | 0      | 0      | 0      | 0      | 1      | 1      | 1      | 1      | 0      | 1      | 0      | 0      |
| Zymophilus        | 1              | 2              | 0      | 0      | 0      | 0      | 0      | 0      | 0      | 0      | 0      | 0      | 0      | 0      | 0      | 0      | 0      | 0      | 0      | 0      |

| Genus               | Cluster Number | Protein Counts | K01195 | K01253 | K01426 | K01428 | K01457 | K01464 | K01489 | K01500 | K01501 | K01502 | K01512 | K01555 | K01560 | K01561 | K01563 | K01564 | K01576 | K01607 |
|---------------------|----------------|----------------|--------|--------|--------|--------|--------|--------|--------|--------|--------|--------|--------|--------|--------|--------|--------|--------|--------|--------|
| Acaricomes          | 1              | 2              | 0      | 0      | 0      | 0      | 0      | 0      | 0      | 0      | 0      | 0      | 0      | 0      | 0      | 0      | 0      | 0      | 0      | 0      |
| Acaryochloris       | 2              | 88             | 0      | 0      | 1      | 1      | 0      | 0      | 1      | 0      | 0      | 1      | 1      | 0      | 0      | 0      | 0      | 0      | 0      | 0      |
| Acetivibrio         | 1              | 2              | 0      | 0      | 0      | 0      | 0      | 0      | 0      | 0      | 0      | 0      | 0      | 0      | 0      | 0      | 0      | 0      | 0      | 0      |
| Acetobacter         | 2              | 85             | 0      | 0      | 0      | 1      | 1      | 1      | 0      | 0      | 0      | 1      | 0      | 0      | 0      | 0      | 0      | 0      | 1      | 0      |
| Acetobacteraceae    | 1              | 2              | 0      | 0      | 0      | 0      | 0      | 0      | 0      | 0      | 0      | 0      | 0      | 0      | 0      | 0      | 0      | 0      | 0      | 0      |
| Acetobacterium      | 1              | 8              | 0      | 0      | 0      | 0      | 0      | 1      | 0      | 0      | 0      | 0      | 0      | 0      | 0      | 0      | 0      | 0      | 0      | 0      |
| Acetohalobium       | 2              | 79             | 0      | 0      | 0      | 0      | 0      | 0      | 1      | 0      | 0      | 0      | 1      | 0      | 0      | 0      | 0      | 0      | 0      | 0      |
| Acholeplasma        | 2              | 38             | 0      | 0      | 0      | 0      | 0      | 0      | 1      | 0      | 0      | 0      | 0      | 0      | 0      | 0      | 0      | 0      | 0      | 0      |
| Achromobacter       | 2              | 192            | 0      | 0      | 1      | 0      | 1      | 1      | 0      | 0      | 1      | 0      | 1      | 1      | 0      | 1      | 0      | 0      | 0      | 1      |
| Acidaminococcus     | 1              | 65             | 0      | 0      | 0      | 0      | 0      | 0      | 1      | 0      | 1      | 0      | 0      | 0      | 0      | 0      | 0      | 0      | 0      | 1      |
| Acidianus           | 1              | 9              | 0      | 0      | 0      | 0      | 0      | 0      | 1      | 0      | 0      | 0      | 1      | 0      | 0      | 0      | 0      | 0      | 1      | 0      |
| Acidilobus          | 1              | 8              | 0      | 0      | 0      | 0      | 0      | 0      | 1      | 0      | 0      | 0      | 1      | 0      | 0      | 0      | 0      | 0      | 0      | 0      |
| Acidimicrobium      | 2              | 58             | 0      | 0      | 1      | 0      | 0      | 0      | 0      | 0      | 0      | 0      | 0      | 1      | 0      | 0      | 0      | 0      | 0      | 0      |
| Acidiphilium        | 3              | 144            | 0      | 0      | 1      | 0      | 1      | 0      | 0      | 0      | 1      | 0      | 1      | 1      | 1      | 1      | 0      | 0      | 0      | 1      |
| Acidithiobacillus   | 2              | 70             | 0      | 0      | 0      | 0      | 0      | 0      | 1      | 0      | 1      | 0      | 0      | 0      | 0      | 0      | 0      | 0      | 1      | 1      |
| Acidobacterium      | 2              | 91             | 0      | 0      | 0      | 0      | 0      | 0      | 1      | 0      | 0      | 0      | 1      | 1      | 0      | 0      | 0      | 0      | 1      | 0      |
| Acidocella          | 1              | 2              | 0      | 0      | 0      | 0      | 0      | 0      | 0      | 0      | 0      | 0      | 0      | 0      | 0      | 0      | 0      | 0      | 0      | 0      |
| Acidothermus        | 2              | 68             | 0      | 0      | 1      | 0      | 0      | 0      | 0      | 0      | 0      | 0      | 1      | 0      | 0      | 0      | 0      | 0      | 0      | 0      |
| Acidovorax          | 3              | 217            | 0      | 0      | 1      | 1      | 0      | 1      | 0      | 0      | 1      | 1      | 1      | 1      | 1      | 1      | 0      | 0      | 1      | 1      |
| Aciduliprofundum    | 1              | 11             | 0      | 0      | 0      | 0      | 0      | 0      | 1      | 0      | 0      | 0      | 1      | 0      | 1      | 0      | 0      | 0      | 0      | 0      |
| Acinetobacter       | 3              | 188            | 0      | 0      | 1      | 1      | 1      | 0      | 0      | 1      | 0      | 0      | 0      | 1      | 0      | 0      | 0      | 0      | 0      | 1      |
| Actinobacillus      | 2              | 112            | 0      | 0      | 0      | 1      | 0      | 0      | 1      | 0      | 0      | 0      | 1      | 0      | 0      | 0      | 0      | 0      | 0      | 1      |
| Actinomadura        | 1              | 1              | 0      | 0      | 0      | 0      | 0      | 0      | 0      | 0      | 0      | 0      | 0      | 0      | 0      | 0      | 0      | 0      | 0      | 0      |
| Actinoplanes        | 1              | 52             | 0      | 0      | 1      | 1      | 0      | 1      | 1      | 0      | 0      | 0      | 0      | 1      | 1      | 1      | 1      | 0      | 0      | 1      |
| Actinopolyspora     | 1              | 2              | 0      | 0      | 0      | 0      | 0      | 0      | 0      | 0      | 0      | 0      | 0      | 0      | 0      | 0      | 0      | 0      | 0      | 0      |
| Actinosynnema       | 2              | 122            | 0      | 0      | 1      | 1      | 0      | 1      | 1      | 0      | 0      | 0      | 1      | 1      | 0      | 0      | 0      | 0      | 0      | 1      |
| Advenella           | 1              | 30             | 0      | 0      | 0      | 1      | 0      | 1      | 0      | 0      | 0      | 0      | 0      | 0      | 0      | 0      | 0      | 0      | 0      | 1      |
| Aequorivita         | 1              | 12             | 0      | 0      | 0      | 0      | 0      | 0      | 1      | 0      | 0      | 0      | 0      | 1      | 0      | 0      | 0      | 0      | 0      | 0      |
| Aerococcus          | 2              | 57             | 1      | 0      | 1      | 0      | 0      | 0      | 0      | 0      | 0      | 0      | 1      | 0      | 0      | 0      | 0      | 0      | 0      | 0      |
| Aeromonas           | 2              | 127            | 0      | 0      | 1      | 0      | 0      | 1      | 1      | 0      | 1      | 0      | 1      | 0      | 0      | 0      | 0      | 0      | 0      | 0      |
| Aeropyrum           | 1              | 13             | 0      | 0      | 1      | 0      | 0      | 0      | 1      | 0      | 0      | 0      | 1      | 0      | 0      | 0      | 0      | 0      | 0      | 0      |
| Afipia              | 1              | 54             | 0      | 0      | 0      | 1      | 0      | 0      | 0      | 0      | 0      | 1      | 0      | 0      | 1      | 0      | 0      | 0      | 0      | 1      |
| Aggregatibacter     | 1              | 81             | 0      | 0      | 0      | 0      | 0      | 0      | 1      | 0      | 0      | 0      | 1      | 0      | 1      | 0      | 0      | 0      | 0      | 0      |
| Agrobacterium       | 2              | 242            | 0      | 0      | 1      | 1      | 1      | 1      | 1      | 0      | 0      | 1      | 1      | 0      | 1      | 1      | 1      | 0      | 1      | 1      |
| Ahrensia            | 1              | 2              | 0      | 0      | 0      | 0      | 0      | 0      | 0      | 0      | 0      | 0      | 0      | 0      | 0      | 0      | 0      | 0      | 0      | 0      |
| Akkermansia         | 2              | 47             | 0      | 0      | 0      | 0      | 0      | 0      | 0      | 0      | 0      | 0      | 0      | 0      | 0      | 0      | 0      | 0      | 0      | 1      |
| Albidiferax         | 3              | 144            | 0      | 0      | 0      | 1      | 1      | 0      | 0      | 0      | 1      | 0      | 1      | 0      | 1      | 0      | 0      | 0      | 0      | 1      |
| Alcaligenes         | 1              | 21             | 0      | 0      | 0      | 0      | 0      | 0      | 0      | 0      | 0      | 0      | 0      | 0      | 0      | 0      | 0      | 0      | 0      | 0      |
| Alcanivorax         | 2              | 146            | 0      | 0      | 1      | 1      | 1      | 0      | 0      | 1      | 0      | 1      | 1      | 0      | 1      | 0      | 1      | 1      | 0      | 0      |
| Alicyclophilus      | 3              | 152            | 0      | 0      | 1      | 0      | 0      | 0      | 0      | 0      | 1      | 0      | 1      | 0      | 0      | 0      | 0      | 0      | 0      | 0      |
| Alicyclobacillus    | 2              | 91             | 0      | 0      | 1      | 0      | 1      | 0      | 0      | 0      | 0      | 0      | 0      | 0      | 1      | 0      | 0      | 0      | 0      | 0      |
| Aliivibrio          | 2              | 118            | 0      | 0      | 0      | 1      | 0      | 0      | 1      | 0      | 0      | 0      | 1      | 0      | 0      | 0      | 0      | 0      | 0      | 0      |
| Alishewanella       | 1              | 1              | 0      | 0      | 0      | 0      | 0      | 0      | 0      | 0      | 0      | 0      | 0      | 0      | 0      | 0      | 0      | 0      | 0      | 0      |
| Alistipes           | 1              | 52             | 1      | 0      | 0      | 1      | 0      | 0      | 1      | 0      | 0      | 0      | 0      | 0      | 0      | 0      | 0      | 0      | 0      | 1      |
| Alkalilimnicola     | 2              | 97             | 0      | 0      | 0      | 1      | 1      | 0      | 0      | 1      | 1      | 0      | 1      | 0      | 0      | 0      | 0      | 0      | 0      | 0      |
| Alkaliphilus        | 2              | 62             | 0      | 0      | 1      | 0      | 0      | 1      | 1      | 0      | 0      | 0      | 0      | 0      | 0      | 0      | 0      | 0      | 0      | 0      |
| Allochromatium      | 2              | 84             | 0      | 0      | 0      | 0      | 0      | 0      | 0      | 0      | 1      | 0      | 1      | 0      | 0      | 0      | 0      | 0      | 0      | 0      |
| Alphaproteobacteria | 1              | 3              | 0      | 0      | 0      | 0      | 0      | 0      | 0      | 0      | 0      | 0      | 0      | 0      | 0      | 0      | 0      | 0      | 0      | 0      |
| Alteromonadales     | 1              | 12             | 0      | 0      | 0      | 0      | 0      | 0      | 0      | 0      | 0      | 0      | 0      | 0      | 0      | 0      | 0      | 0      | 0      | 0      |
| Alteromonas         | 1              | 37             | 0      | 0      | 1      | 1      | 0      | 1      | 1      | 0      | 1      | 0      | 0      | 0      | 1      | 0      | 1      | 0      | 0      | 0      |
| Aminobacter         | 1              | 4              | 0      | 0      | 0      | 0      | 0      | 0      | 0      | 0      | 0      | 0      | 0      | 0      | 0      | 0      | 0      | 0      | 0      | 0      |
| Aminobacterium      | 2              | 59             | 0      | 0      | 0      | 0      | 0      | 1      | 1      | 0      | 0      | 0      | 1      | 0      | 0      | 0      | 0      | 0      | 0      | 0      |

| Genus            | Cluster Number | Protein Counts | K01195 | K01253 | K01426 | K01428 | K01457 | K01464 | K01489 | K01500 | K01501 | K01502 | K01512 | K01555 | K01560 | K01561 | K01563 | K01564 | K01576 | K01607 |
|------------------|----------------|----------------|--------|--------|--------|--------|--------|--------|--------|--------|--------|--------|--------|--------|--------|--------|--------|--------|--------|--------|
| Ammonifex        | 2              | 50             | 0      | 0      | 0      | 0      | 0      | 0      | 1      | 0      | 0      | 0      | 1      | 0      | 0      | 0      | 0      | 0      | 0      | 0      |
| Amphibacillus    | 1              | 13             | 0      | 0      | 1      | 0      | 0      | 0      | 1      | 0      | 0      | 0      | 1      | 0      | 0      | 0      | 0      | 0      | 0      | 1      |
| Amphritea        | 1              | 2              | 0      | 0      | 0      | 0      | 0      | 0      | 0      | 0      | 0      | 0      | 0      | 0      | 0      | 0      | 0      | 0      | 0      | 0      |
| Amycolatopsis    | 2              | 201            | 0      | 1      | 1      | 1      | 1      | 1      | 1      | 0      | 0      | 0      | 1      | 1      | 1      | 1      | 1      | 0      | 1      | 1      |
| Amycolicoccus    | 1              | 43             | 0      | 0      | 1      | 1      | 1      | 0      | 1      | 0      | 0      | 0      | 1      | 1      | 1      | 0      | 1      | 0      | 0      | 1      |
| Anabaena         | 2              | 92             | 0      | 0      | 1      | 1      | 0      | 0      | 0      | 1      | 0      | 0      | 1      | 0      | 0      | 1      | 1      | 0      | 0      | 1      |
| Anaerobaculum    | 1              | 11             | 0      | 0      | 1      | 0      | 0      | 1      | 1      | 0      | 0      | 0      | 1      | 0      | 0      | 0      | 0      | 0      | 0      | 0      |
| Anaerococcus     | 2              | 46             | 0      | 0      | 0      | 1      | 0      | 1      | 1      | 0      | 0      | 0      | 1      | 0      | 0      | 0      | 0      | 0      | 0      | 0      |
| Anaerolinea      | 2              | 66             | 0      | 0      | 0      | 0      | 0      | 1      | 1      | 0      | 0      | 0      | 1      | 0      | 0      | 0      | 0      | 0      | 0      | 0      |
| Anaeromyxobacter | 3              | 117            | 0      | 0      | 1      | 1      | 0      | 0      | 1      | 0      | 0      | 0      | 1      | 0      | 1      | 1      | 1      | 0      | 0      | 0      |
| Anaerostipes     | 1              | 44             | 0      | 0      | 0      | 0      | 0      | 1      | 0      | 0      | 0      | 0      | 1      | 0      | 1      | 0      | 0      | 0      | 0      | 0      |
| Anaerotruncus    | 1              | 2              | 0      | 0      | 0      | 0      | 0      | 0      | 0      | 0      | 0      | 0      | 0      | 0      | 0      | 0      | 0      | 0      | 0      | 0      |
| Anaplasma        | 1              | 35             | 0      | 0      | 0      | 0      | 0      | 0      | 0      | 0      | 0      | 0      | 0      | 0      | 0      | 0      | 0      | 0      | 0      | 0      |
| Ancylobacter     | 1              | 3              | 0      | 0      | 0      | 0      | 0      | 0      | 0      | 0      | 0      | 0      | 0      | 0      | 0      | 0      | 0      | 0      | 0      | 0      |
| Aneurinibacillus | 1              | 1              | 0      | 0      | 0      | 0      | 0      | 0      | 0      | 0      | 0      | 0      | 0      | 0      | 0      | 0      | 0      | 0      | 0      | 0      |
| Angomonas        | 1              | 1              | 0      | 0      | 0      | 0      | 0      | 0      | 0      | 0      | 0      | 0      | 0      | 0      | 0      | 0      | 0      | 0      | 0      | 0      |
| Anoxybacillus    | 2              | 72             | 0      | 0      | 0      | 0      | 0      | 0      | 1      | 0      | 0      | 0      | 1      | 0      | 0      | 0      | 0      | 0      | 0      | 0      |
| Aquifex          | 2              | 45             | 0      | 0      | 0      | 0      | 0      | 0      | 0      | 0      | 0      | 0      | 0      | 0      | 0      | 0      | 0      | 0      | 0      | 0      |
| Aquimarina       | 1              | 2              | 0      | 0      | 0      | 0      | 0      | 0      | 0      | 0      | 0      | 0      | 0      | 0      | 0      | 0      | 0      | 0      | 0      | 0      |
| Arcanobacterium  | 2              | 45             | 0      | 0      | 0      | 0      | 0      | 0      | 1      | 0      | 0      | 0      | 0      | 0      | 0      | 0      | 0      | 0      | 0      | 0      |
| Archaeoglobus    | 1              | 14             | 0      | 0      | 0      | 0      | 0      | 0      | 0      | 0      | 0      | 0      | 1      | 0      | 0      | 0      | 0      | 0      | 0      | 0      |
| Arcobacter       | 2              | 101            | 0      | 0      | 0      | 1      | 1      | 0      | 0      | 0      | 0      | 0      | 1      | 0      | 0      | 0      | 0      | 0      | 0      | 1      |
| Aromatoleum      | 3              | 133            | 0      | 0      | 0      | 0      | 0      | 0      | 0      | 0      | 1      | 0      | 0      | 0      | 1      | 0      | 0      | 0      | 0      | 0      |
| Arsenophonus     | 1              | 4              | 0      | 0      | 0      | 0      | 0      | 0      | 0      | 0      | 0      | 0      | 0      | 0      | 0      | 0      | 0      | 0      | 0      | 0      |
| Arthrobacter     | 2              | 206            | 1      | 1      | 1      | 1      | 1      | 1      | 1      | 1      | 1      | 1      | 1      | 0      | 1      | 0      | 0      | 0      | 1      | 1      |
| Arthrospira      | 2              | 67             | 0      | 0      | 0      | 1      | 0      | 0      | 0      | 0      | 0      | 0      | 1      | 0      | 0      | 0      | 0      | 0      | 0      | 0      |
| Aster            | 1              | 10             | 0      | 0      | 0      | 0      | 0      | 0      | 0      | 0      | 0      | 0      | 0      | 0      | 0      | 0      | 0      | 0      | 0      | 0      |
| Asticcacaulis    | 2              | 103            | 1      | 0      | 1      | 0      | 1      | 0      | 1      | 0      | 0      | 0      | 0      | 1      | 0      | 0      | 0      | 0      | 0      | 1      |
| Atopobium        | 1              | 28             | 0      | 0      | 0      | 0      | 0      | 1      | 0      | 0      | 0      | 0      | 0      | 0      | 0      | 0      | 0      | 0      | 0      | 0      |
| Aurantimonas     | 1              | 2              | 0      | 0      | 0      | 0      | 0      | 0      | 0      | 0      | 0      | 0      | 0      | 0      | 0      | 0      | 0      | 0      | 0      | 0      |
| Avibacterium     | 1              | 17             | 0      | 0      | 0      | 0      | 0      | 0      | 0      | 0      | 0      | 0      | 0      | 0      | 0      | 0      | 0      | 0      | 0      | 0      |
| Azoarcus         | 3              | 172            | 0      | 0      | 1      | 1      | 1      | 1      | 0      | 0      | 1      | 1      | 1      | 0      | 1      | 1      | 0      | 0      | 0      | 1      |
| Azorhizobium     | 3              | 149            | 0      | 0      | 1      | 1      | 1      | 1      | 0      | 0      | 1      | 1      | 1      | 0      | 1      | 1      | 0      | 0      | 0      | 1      |
| Azorhizophilus   | 1              | 4              | 0      | 0      | 0      | 0      | 0      | 0      | 0      | 0      | 0      | 0      | 0      | 0      | 0      | 0      | 0      | 0      | 0      | 0      |
| Azospira         | 1              | 19             | 0      | 0      | 0      | 0      | 0      | 0      | 0      | 0      | 1      | 0      | 1      | 0      | 1      | 0      | 0      | 0      | 0      | 1      |
| Azospirillum     | 2              | 198            | 1      | 0      | 1      | 1      | 1      | 1      | 1      | 0      | 1      | 0      | 1      | 0      | 1      | 1      | 0      | 0      | 0      | 1      |
| Azotobacter      | 3              | 183            | 0      | 0      | 0      | 1      | 0      | 0      | 0      | 0      | 0      | 0      | 1      | 1      | 0      | 1      | 0      | 0      | 0      | 1      |
| Bacillales       | 1              | 9              | 0      | 0      | 0      | 0      | 0      | 0      | 1      | 0      | 0      | 0      | 0      | 0      | 0      | 0      | 0      | 0      | 0      | 0      |
| Bacilli          | 1              | 3              | 0      | 0      | 0      | 0      | 0      | 0      | 0      | 0      | 0      | 0      | 0      | 0      | 0      | 0      | 0      | 0      | 0      | 0      |
| Bacillus         | 2              | 237            | 1      | 1      | 1      | 1      | 1      | 1      | 1      | 0      | 1      | 1      | 1      | 0      | 1      | 0      | 0      | 0      | 0      | 1      |
| Bacteria         | 2              | 86             | 0      | 0      | 1      | 1      | 0      | 0      | 0      | 0      | 1      | 0      | 0      | 0      | 0      | 0      | 1      | 0      | 0      | 0      |
| Bacteriovorax    | 2              | 98             | 0      | 0      | 0      | 0      | 0      | 0      | 1      | 0      | 0      | 0      | 0      | 0      | 1      | 0      | 1      | 0      | 0      | 0      |
| Bacteroidales    | 2              | 59             | 0      | 0      | 0      | 0      | 0      | 0      | 1      | 0      | 0      | 0      | 0      | 0      | 0      | 0      | 0      | 0      | 0      | 1      |
| Bacteroides      | 2              | 96             | 1      | 0      | 0      | 0      | 0      | 0      | 1      | 0      | 0      | 0      | 0      | 0      | 0      | 0      | 0      | 0      | 0      | 1      |
| Bacteroidetes    | 1              | 2              | 0      | 0      | 0      | 0      | 0      | 0      | 0      | 0      | 0      | 0      | 0      | 0      | 0      | 0      | 0      | 0      | 0      | 0      |
| Bartonella       | 2              | 50             | 0      | 0      | 0      | 0      | 0      | 0      | 0      | 0      | 0      | 0      | 0      | 0      | 0      | 0      | 0      | 0      | 0      | 0      |
| Baumannia        | 2              | 24             | 0      | 0      | 0      | 0      | 0      | 0      | 0      | 0      | 0      | 0      | 0      | 0      | 0      | 0      | 0      | 0      | 0      | 0      |
| Bdellovibrio     | 2              | 87             | 0      | 0      | 0      | 0      | 0      | 0      | 1      | 0      | 0      | 0      | 0      | 0      | 1      | 0      | 1      | 0      | 0      | 0      |
| Beijerinckia     | 3              | 123            | 0      | 0      | 1      | 1      | 0      | 0      | 1      | 0      | 1      | 0      | 1      | 0      | 1      | 1      | 0      | 0      | 0      | 1      |
| Belliella        | 1              | 14             | 0      | 0      | 0      | 0      | 0      | 0      | 1      | 0      | 0      | 0      | 0      | 1      | 0      | 0      | 0      | 0      | 0      | 0      |
| Beutenbergia     | 2              | 82             | 0      | 0      | 1      | 0      | 0      | 1      | 1      | 0      | 0      | 0      | 1      | 0      | 0      | 0      | 0      | 0      | 0      | 1      |
| Bifidobacterium  | 2              | 61             | 1      | 0      | 1      | 1      | 0      | 0      | 1      | 0      | 0      | 0      | 1      | 0      | 1      | 0      | 0      | 0      | 0      | 1      |

| Genus                | Cluster Number | Protein Counts | K01195 | K01253 | K01426 | K01428 | K01457 | K01464 | K01489 | K01500 | K01501 | K01502 | K01512 | K01555 | K01560 | K01561 | K01563 | K01564 | K01576 | K01607 |
|----------------------|----------------|----------------|--------|--------|--------|--------|--------|--------|--------|--------|--------|--------|--------|--------|--------|--------|--------|--------|--------|--------|
| Bizionia             | 1              | 1              | 0      | 0      | 0      | 0      | 0      | 0      | 0      | 0      | 0      | 0      | 0      | 0      | 0      | 0      | 0      | 0      | 0      | 0      |
| Blastococcus         | 1              | 39             | 0      | 0      | 1      | 0      | 0      | 0      | 1      | 0      | 0      | 0      | 1      | 1      | 1      | 0      | 1      | 0      | 0      | 1      |
| Blattabacterium      | 1              | 23             | 0      | 0      | 0      | 1      | 0      | 0      | 0      | 0      | 0      | 0      | 0      | 0      | 0      | 0      | 0      | 0      | 0      | 0      |
| Blautia              | 1              | 22             | 0      | 0      | 0      | 0      | 0      | 0      | 1      | 0      | 0      | 0      | 0      | 0      | 0      | 0      | 0      | 0      | 0      | 0      |
| Bordetella           | 3              | 227            | 0      | 0      | 1      | 1      | 1      | 1      | 0      | 0      | 1      | 0      | 1      | 1      | 1      | 1      | 0      | 0      | 0      | 1      |
| Borrelia             | 1              | 32             | 0      | 0      | 0      | 0      | 0      | 0      | 1      | 0      | 0      | 0      | 1      | 0      | 0      | 0      | 0      | 0      | 0      | 0      |
| Brachybacterium      | 1              | 18             | 0      | 0      | 1      | 1      | 0      | 0      | 1      | 0      | 0      | 0      | 1      | 0      | 0      | 0      | 0      | 0      | 0      | 0      |
| Brachymonas          | 1              | 4              | 0      | 0      | 0      | 0      | 0      | 0      | 0      | 0      | 0      | 0      | 0      | 0      | 0      | 0      | 0      | 0      | 0      | 0      |
| Brachyspira          | 2              | 79             | 1      | 0      | 0      | 0      | 0      | 1      | 0      | 0      | 0      | 0      | 1      | 0      | 0      | 0      | 0      | 0      | 0      | 1      |
| Bradyrhizobiaceae    | 1              | 20             | 0      | 0      | 0      | 1      | 0      | 0      | 0      | 0      | 0      | 0      | 0      | 0      | 0      | 0      | 0      | 0      | 0      | 0      |
| Bradyrhizobium       | 3              | 254            | 0      | 1      | 1      | 1      | 1      | 1      | 1      | 1      | 0      | 1      | 1      | 1      | 1      | 1      | 1      | 1      | 1      | 1      |
| Brenneria            | 1              | 20             | 0      | 0      | 0      | 0      | 0      | 0      | 0      | 0      | 0      | 0      | 0      | 0      | 0      | 0      | 0      | 0      | 0      | 0      |
| Brevibacillus        | 2              | 122            | 0      | 0      | 1      | 0      | 0      | 1      | 1      | 0      | 1      | 0      | 0      | 0      | 1      | 0      | 0      | 0      | 0      | 1      |
| Brevibacterium       | 1              | 4              | 0      | 0      | 0      | 0      | 0      | 0      | 0      | 0      | 0      | 0      | 0      | 0      | 0      | 0      | 0      | 0      | 0      | 0      |
| Brevundimonas        | 2              | 105            | 0      | 0      | 1      | 0      | 0      | 0      | 0      | 0      | 0      | 0      | 0      | 0      | 0      | 0      | 0      | 0      | 1      | 1      |
| Brucella             | 3              | 138            | 0      | 0      | 1      | 1      | 0      | 1      | 0      | 0      | 0      | 0      | 0      | 0      | 1      | 0      | 0      | 1      | 0      | 1      |
| Buchnera             | 1              | 26             | 0      | 0      | 0      | 0      | 0      | 0      | 0      | 0      | 0      | 0      | 0      | 0      | 0      | 0      | 0      | 0      | 0      | 0      |
| Burkholderia         | 3              | 424            | 0      | 1      | 1      | 1      | 1      | 1      | 1      | 0      | 1      | 1      | 1      | 1      | 1      | 1      | 1      | 1      | 1      | 1      |
| Burkholderiaceae     | 3              | 143            | 0      | 0      | 1      | 0      | 0      | 0      | 0      | 0      | 1      | 1      | 1      | 1      | 1      | 1      | 0      | 0      | 0      | 1      |
| Burkholderiales      | 1              | 24             | 0      | 0      | 0      | 0      | 0      | 0      | 0      | 0      | 0      | 0      | 0      | 0      | 0      | 0      | 0      | 0      | 0      | 0      |
| Buttiauxella         | 1              | 2              | 0      | 0      | 0      | 0      | 0      | 0      | 0      | 0      | 0      | 0      | 0      | 0      | 0      | 0      | 0      | 0      | 0      | 0      |
| Butyrivibrio         | 2              | 67             | 0      | 0      | 0      | 0      | 0      | 0      | 1      | 0      | 0      | 0      | 1      | 0      | 0      | 0      | 0      | 0      | 0      | 0      |
| Caldanaerobacter     | 2              | 63             | 0      | 0      | 1      | 0      | 0      | 0      | 1      | 0      | 0      | 0      | 1      | 0      | 0      | 0      | 0      | 0      | 0      | 0      |
| Caldicellulosiruptor | 2              | 75             | 1      | 0      | 0      | 1      | 0      | 0      | 1      | 0      | 0      | 0      | 0      | 0      | 0      | 0      | 0      | 0      | 0      | 0      |
| Caldilinea           | 1              | 23             | 0      | 0      | 1      | 1      | 0      | 1      | 1      | 0      | 0      | 0      | 1      | 0      | 0      | 0      | 0      | 0      | 0      | 0      |
| Caldimonas           | 1              | 6              | 0      | 0      | 0      | 0      | 0      | 0      | 0      | 0      | 0      | 0      | 0      | 0      | 0      | 0      | 0      | 0      | 0      | 0      |
| Caldisericum         | 1              | 10             | 0      | 0      | 0      | 0      | 0      | 0      | 1      | 0      | 0      | 0      | 1      | 0      | 0      | 0      | 0      | 0      | 0      | 0      |
| Caldisphaera         | 1              | 7              | 0      | 0      | 0      | 0      | 0      | 0      | 0      | 0      | 0      | 0      | 1      | 0      | 0      | 0      | 0      | 0      | 0      | 0      |
| Calditerrivibrio     | 2              | 74             | 0      | 0      | 0      | 0      | 0      | 0      | 0      | 0      | 0      | 0      | 1      | 0      | 0      | 0      | 0      | 0      | 0      | 0      |
| Caldivirga           | 1              | 13             | 1      | 0      | 0      | 0      | 0      | 0      | 1      | 0      | 0      | 0      | 1      | 0      | 0      | 0      | 0      | 0      | 0      | 1      |
| Calothrix            | 1              | 43             | 0      | 0      | 1      | 1      | 0      | 0      | 0      | 0      | 0      | 0      | 0      | 0      | 0      | 0      | 0      | 0      | 0      | 0      |
| Calyptogena          | 2              | 34             | 0      | 0      | 0      | 0      | 0      | 0      | 0      | 0      | 0      | 0      | 0      | 0      | 0      | 0      | 0      | 0      | 0      | 0      |
| Campylobacter        | 2              | 80             | 0      | 0      | 0      | 0      | 0      | 0      | 0      | 0      | 1      | 0      | 0      | 0      | 0      | 0      | 0      | 0      | 1      | 0      |
| Candidatus           | 2              | 290            | 1      | 1      | 1      | 1      | 1      | 1      | 1      | 1      | 1      | 0      | 1      | 1      | 1      | 1      | 1      | 1      | 0      | 1      |
| Capnocytophaga       | 1              | 50             | 0      | 0      | 0      | 0      | 0      | 0      | 1      | 0      | 0      | 0      | 0      | 1      | 0      | 0      | 0      | 0      | 0      | 0      |
| Carbophilus          | 1              | 2              | 0      | 0      | 0      | 0      | 0      | 0      | 0      | 0      | 0      | 0      | 0      | 0      | 0      | 0      | 0      | 0      | 0      | 0      |
| Carboxydibrachium    | 1              | 14             | 0      | 0      | 0      | 0      | 0      | 0      | 0      | 0      | 0      | 0      | 0      | 0      | 0      | 0      | 0      | 0      | 0      | 0      |
| Carboxydotherrmus    | 2              | 68             | 0      | 0      | 0      | 0      | 0      | 0      | 1      | 0      | 0      | 0      | 0      | 0      | 0      | 0      | 0      | 0      | 0      | 0      |
| Carica               | 1              | 2              | 1      | 0      | 0      | 0      | 0      | 0      | 0      | 0      | 0      | 0      | 0      | 0      | 0      | 0      | 0      | 0      | 0      | 0      |
| Carnobacterium       | 2              | 71             | 1      | 0      | 1      | 0      | 0      | 0      | 1      | 0      | 0      | 0      | 1      | 0      | 1      | 1      | 0      | 0      | 0      | 1      |
| Catenibacterium      | 1              | 2              | 0      | 0      | 0      | 0      | 0      | 0      | 0      | 0      | 0      | 0      | 0      | 0      | 0      | 0      | 0      | 0      | 0      | 1      |
| Catenovulum          | 1              | 2              | 0      | 0      | 0      | 0      | 0      | 0      | 0      | 0      | 0      | 0      | 0      | 0      | 0      | 0      | 0      | 0      | 0      | 0      |
| Catenulispora        | 3              | 159            | 0      | 0      | 1      | 1      | 1      | 0      | 1      | 0      | 0      | 0      | 0      | 1      | 0      | 1      | 1      | 0      | 0      | 1      |
| Caulobacter          | 3              | 168            | 0      | 0      | 1      | 0      | 1      | 0      | 1      | 0      | 1      | 0      | 0      | 1      | 1      | 1      | 1      | 0      | 0      | 0      |
| Cedecea              | 1              | 45             | 0      | 0      | 0      | 0      | 0      | 0      | 0      | 0      | 0      | 0      | 0      | 0      | 0      | 0      | 0      | 0      | 0      | 0      |
| Cellulomonas         | 2              | 96             | 0      | 0      | 0      | 1      | 1      | 1      | 1      | 0      | 0      | 0      | 1      | 0      | 1      | 0      | 1      | 0      | 0      | 0      |
| Cellulophaga         | 2              | 105            | 1      | 0      | 1      | 0      | 0      | 0      | 1      | 0      | 1      | 0      | 0      | 1      | 1      | 0      | 0      | 0      | 0      | 0      |
| Cellulosilyticum     | 1              | 14             | 0      | 0      | 0      | 0      | 1      | 1      | 1      | 0      | 0      | 0      | 0      | 0      | 0      | 0      | 0      | 0      | 0      | 0      |
| Cellvibrio           | 2              | 85             | 0      | 0      | 0      | 0      | 1      | 0      | 0      | 0      | 0      | 0      | 0      | 0      | 0      | 0      | 0      | 0      | 0      | 0      |
| Cenarchaeum          | 1              | 7              | 0      | 0      | 0      | 1      | 0      | 1      | 0      | 0      | 0      | 0      | 0      | 0      | 0      | 0      | 0      | 0      | 0      | 0      |
| Chamaesiphon         | 1              | 13             | 0      | 0      | 1      | 1      | 0      | 0      | 1      | 0      | 0      | 1      | 0      | 0      | 0      | 0      | 0      | 0      | 0      | 0      |
| Chelativorans        | 3              | 136            | 0      | 0      | 1      | 1      | 0      | 1      | 1      | 0      | 1      | 0      | 0      | 0      | 1      | 0      | 0      | 0      | 0      | 1      |

| Genus                  | Cluster Number | Protein Counts | K01195 | K01253 | K01426 | K01428 | K01457 | K01464 | K01489 | K01500 | K01501 | K01502 | K01512 | K01555 | K01560 | K01561 | K01563 | K01564 | K01576 | K01607 |
|------------------------|----------------|----------------|--------|--------|--------|--------|--------|--------|--------|--------|--------|--------|--------|--------|--------|--------|--------|--------|--------|--------|
| Chelatococcus          | 1              | 2              | 0      | 0      | 0      | 0      | 0      | 0      | 0      | 0      | 0      | 0      | 0      | 0      | 0      | 0      | 0      | 0      | 0      | 0      |
| Chitinophaga           | 2              | 98             | 0      | 0      | 0      | 1      | 0      | 1      | 1      | 0      | 0      | 0      | 1      | 0      | 0      | 0      | 0      | 0      | 1      | 0      |
| Chlamydia              | 1              | 36             | 0      | 0      | 0      | 0      | 0      | 0      | 0      | 1      | 0      | 0      | 0      | 0      | 0      | 0      | 0      | 0      | 0      | 0      |
| Chlamydomonas          | 1              | 3              | 0      | 0      | 0      | 0      | 0      | 0      | 0      | 0      | 0      | 0      | 0      | 0      | 0      | 0      | 0      | 0      | 0      | 0      |
| Chlamydomphila         | 1              | 31             | 0      | 0      | 0      | 0      | 0      | 0      | 0      | 0      | 0      | 0      | 0      | 0      | 0      | 0      | 0      | 0      | 0      | 0      |
| Chlorobaculum          | 2              | 61             | 0      | 0      | 0      | 0      | 0      | 0      | 0      | 0      | 0      | 0      | 1      | 0      | 1      | 0      | 0      | 0      | 0      | 0      |
| Chlorobium             | 2              | 89             | 0      | 0      | 0      | 0      | 0      | 0      | 0      | 0      | 1      | 0      | 1      | 0      | 1      | 0      | 0      | 0      | 0      | 0      |
| Chlorobium/Pelodictyon | 1              | 2              | 0      | 0      | 0      | 0      | 0      | 0      | 0      | 0      | 0      | 0      | 0      | 0      | 0      | 0      | 0      | 0      | 0      | 0      |
| Chloroflexus           | 2              | 105            | 0      | 0      | 1      | 0      | 0      | 0      | 1      | 0      | 0      | 0      | 1      | 1      | 1      | 1      | 1      | 0      | 0      | 0      |
| Chlorogloeopsis        | 1              | 9              | 0      | 0      | 0      | 1      | 0      | 0      | 0      | 0      | 0      | 0      | 0      | 0      | 0      | 0      | 0      | 0      | 0      | 0      |
| Chloroherpeton         | 2              | 59             | 0      | 0      | 0      | 0      | 0      | 0      | 0      | 0      | 0      | 0      | 1      | 0      | 1      | 0      | 0      | 0      | 0      | 0      |
| Chromobacterium        | 2              | 117            | 0      | 0      | 0      | 0      | 0      | 0      | 1      | 0      | 1      | 0      | 0      | 0      | 1      | 0      | 0      | 0      | 1      | 1      |
| Chromohalobacter       | 2              | 145            | 0      | 0      | 0      | 1      | 0      | 0      | 1      | 0      | 0      | 0      | 1      | 0      | 1      | 1      | 0      | 0      | 1      | 0      |
| Chroococciopsis        | 1              | 24             | 0      | 0      | 1      | 1      | 0      | 0      | 0      | 0      | 0      | 0      | 1      | 1      | 1      | 0      | 0      | 0      | 1      | 0      |
| Chryseobacterium       | 2              | 104            | 0      | 0      | 1      | 0      | 0      | 1      | 0      | 0      | 0      | 0      | 0      | 1      | 0      | 1      | 0      | 0      | 1      | 1      |
| Citricella             | 1              | 13             | 0      | 0      | 0      | 0      | 0      | 0      | 0      | 0      | 0      | 0      | 0      | 0      | 0      | 0      | 0      | 0      | 0      | 0      |
| Citrobacter            | 2              | 190            | 0      | 0      | 1      | 1      | 0      | 1      | 1      | 0      | 0      | 0      | 1      | 0      | 0      | 0      | 0      | 0      | 0      | 1      |
| Clavibacter            | 2              | 83             | 0      | 0      | 1      | 0      | 1      | 0      | 1      | 0      | 0      | 0      | 0      | 0      | 1      | 0      | 0      | 0      | 0      | 1      |
| Clonorchis             | 1              | 1              | 0      | 0      | 0      | 0      | 0      | 0      | 0      | 0      | 0      | 0      | 0      | 0      | 0      | 0      | 0      | 1      | 0      | 0      |
| Clostridiales          | 2              | 77             | 0      | 0      | 0      | 0      | 0      | 1      | 1      | 0      | 0      | 0      | 1      | 0      | 1      | 0      | 0      | 0      | 0      | 1      |
| Clostridium            | 2              | 191            | 1      | 0      | 1      | 1      | 1      | 1      | 1      | 0      | 1      | 0      | 1      | 0      | 1      | 0      | 0      | 0      | 1      | 1      |
| Cohnella               | 1              | 2              | 0      | 0      | 0      | 0      | 0      | 0      | 0      | 0      | 0      | 0      | 0      | 0      | 0      | 0      | 0      | 0      | 0      | 0      |
| Coleofasciculus        | 1              | 4              | 0      | 0      | 0      | 0      | 0      | 0      | 0      | 0      | 0      | 0      | 0      | 0      | 0      | 0      | 0      | 0      | 0      | 0      |
| Collimonas             | 1              | 35             | 0      | 0      | 1      | 1      | 0      | 0      | 0      | 0      | 1      | 0      | 0      | 1      | 1      | 0      | 0      | 0      | 0      | 1      |
| Colwellia              | 2              | 130            | 0      | 0      | 0      | 0      | 0      | 1      | 1      | 0      | 0      | 0      | 1      | 0      | 1      | 0      | 1      | 0      | 0      | 1      |
| Comamonas              | 2              | 196            | 0      | 0      | 1      | 1      | 0      | 1      | 0      | 0      | 1      | 0      | 0      | 1      | 0      | 0      | 0      | 0      | 1      | 0      |
| Conexibacter           | 3              | 117            | 1      | 0      | 1      | 1      | 0      | 1      | 0      | 0      | 0      | 0      | 0      | 0      | 0      | 0      | 1      | 0      | 1      | 0      |
| Coprobacillus          | 1              | 2              | 0      | 0      | 0      | 0      | 0      | 0      | 0      | 0      | 0      | 0      | 0      | 0      | 0      | 0      | 0      | 0      | 0      | 0      |
| Coprococcus            | 2              | 76             | 0      | 0      | 0      | 0      | 0      | 1      | 1      | 0      | 0      | 0      | 1      | 0      | 1      | 0      | 0      | 0      | 0      | 1      |
| Coprothermobacter      | 2              | 45             | 0      | 0      | 0      | 0      | 0      | 0      | 1      | 0      | 0      | 0      | 1      | 0      | 0      | 0      | 0      | 0      | 0      | 0      |
| Coralimargarita        | 2              | 68             | 0      | 0      | 0      | 1      | 1      | 0      | 1      | 0      | 0      | 0      | 1      | 0      | 0      | 0      | 1      | 0      | 0      | 0      |
| Corallococcus          | 1              | 29             | 0      | 0      | 1      | 1      | 0      | 0      | 1      | 0      | 0      | 0      | 1      | 0      | 0      | 0      | 1      | 0      | 0      | 0      |
| Coriobacterium         | 2              | 36             | 0      | 0      | 0      | 0      | 0      | 0      | 1      | 0      | 0      | 0      | 1      | 0      | 0      | 0      | 0      | 0      | 0      | 0      |
| Corynebacterineae      | 1              | 5              | 0      | 0      | 0      | 0      | 0      | 0      | 0      | 0      | 0      | 0      | 0      | 0      | 0      | 0      | 0      | 0      | 0      | 0      |
| Corynebacterium        | 2              | 175            | 1      | 0      | 1      | 1      | 1      | 1      | 1      | 0      | 0      | 0      | 1      | 0      | 0      | 0      | 0      | 0      | 0      | 1      |
| Coxiella               | 2              | 54             | 0      | 0      | 0      | 0      | 0      | 0      | 0      | 0      | 0      | 0      | 1      | 0      | 0      | 0      | 1      | 0      | 0      | 0      |
| Crinalium              | 1              | 21             | 0      | 0      | 1      | 1      | 0      | 0      | 0      | 0      | 0      | 0      | 1      | 1      | 1      | 0      | 0      | 0      | 0      | 0      |
| Croceibacter           | 2              | 80             | 0      | 0      | 1      | 0      | 0      | 0      | 1      | 0      | 1      | 0      | 0      | 1      | 1      | 0      | 0      | 0      | 0      | 0      |
| Crocospaera            | 1              | 6              | 0      | 0      | 0      | 0      | 0      | 0      | 0      | 0      | 0      | 0      | 0      | 0      | 0      | 0      | 0      | 0      | 0      | 0      |
| Cronobacter            | 2              | 120            | 0      | 0      | 0      | 0      | 1      | 0      | 1      | 0      | 0      | 0      | 1      | 0      | 0      | 0      | 0      | 0      | 0      | 1      |
| Cryptobacterium        | 2              | 39             | 0      | 0      | 0      | 0      | 0      | 0      | 0      | 0      | 0      | 0      | 0      | 0      | 0      | 0      | 0      | 0      | 0      | 0      |
| Cucumis                | 1              | 9              | 0      | 0      | 0      | 0      | 0      | 0      | 0      | 0      | 0      | 0      | 0      | 0      | 0      | 0      | 0      | 0      | 0      | 0      |
| Cupriavidus            | 3              | 317            | 0      | 1      | 1      | 1      | 1      | 1      | 0      | 1      | 1      | 1      | 1      | 1      | 1      | 1      | 0      | 0      | 1      | 1      |
| Curtobacterium         | 1              | 5              | 0      | 0      | 0      | 0      | 0      | 0      | 0      | 0      | 0      | 0      | 0      | 0      | 0      | 0      | 0      | 0      | 0      | 0      |
| Curvibacter            | 1              | 27             | 0      | 0      | 0      | 0      | 0      | 0      | 0      | 0      | 0      | 0      | 0      | 0      | 0      | 0      | 0      | 0      | 0      | 0      |
| Cyanobacterium         | 1              | 9              | 0      | 0      | 1      | 1      | 0      | 0      | 0      | 0      | 0      | 0      | 0      | 0      | 0      | 0      | 0      | 0      | 0      | 1      |
| Cyanobium              | 1              | 10             | 0      | 0      | 0      | 1      | 0      | 0      | 0      | 0      | 0      | 1      | 1      | 0      | 0      | 0      | 0      | 0      | 0      | 0      |
| Cyanothece             | 1              | 34             | 0      | 0      | 1      | 1      | 1      | 0      | 1      | 0      | 0      | 0      | 1      | 1      | 0      | 1      | 1      | 0      | 1      | 1      |
| Cyclobacterium         | 1              | 19             | 0      | 0      | 0      | 0      | 0      | 0      | 1      | 0      | 0      | 0      | 0      | 0      | 1      | 0      | 0      | 0      | 0      | 0      |
| Cycloclasticus         | 1              | 21             | 0      | 0      | 0      | 1      | 0      | 0      | 0      | 0      | 0      | 0      | 0      | 0      | 0      | 0      | 0      | 0      | 0      | 1      |
| Cylindrospermopsis     | 1              | 4              | 0      | 0      | 0      | 0      | 0      | 0      | 0      | 0      | 0      | 0      | 0      | 0      | 0      | 0      | 0      | 0      | 0      | 0      |
| Cylindrospermum        | 1              | 30             | 0      | 0      | 1      | 1      | 0      | 0      | 0      | 0      | 0      | 0      | 1      | 0      | 0      | 0      | 0      | 0      | 0      | 0      |

| Genus              | Cluster Number | Protein Counts | K01195 | K01253 | K01426 | K01428 | K01457 | K01464 | K01489 | K01500 | K01501 | K01502 | K01512 | K01555 | K01560 | K01561 | K01563 | K01564 | K01576 | K01607 |
|--------------------|----------------|----------------|--------|--------|--------|--------|--------|--------|--------|--------|--------|--------|--------|--------|--------|--------|--------|--------|--------|--------|
| Cytophaga          | 2              | 69             | 0      | 0      | 0      | 1      | 0      | 0      | 0      | 0      | 0      | 0      | 0      | 0      | 0      | 0      | 0      | 0      | 0      | 0      |
| Dactylococcopsis   | 1              | 8              | 0      | 0      | 0      | 1      | 0      | 0      | 0      | 0      | 0      | 1      | 1      | 0      | 0      | 0      | 0      | 0      | 0      | 0      |
| Dechloromonas      | 1              | 40             | 0      | 0      | 1      | 1      | 1      | 0      | 0      | 0      | 1      | 0      | 1      | 0      | 0      | 1      | 0      | 0      | 0      | 1      |
| Dechlorosoma       | 1              | 19             | 0      | 0      | 0      | 0      | 0      | 0      | 0      | 0      | 1      | 0      | 1      | 0      | 1      | 0      | 0      | 0      | 0      | 1      |
| Deferribacter      | 2              | 73             | 0      | 0      | 0      | 0      | 0      | 0      | 0      | 0      | 0      | 0      | 1      | 0      | 1      | 0      | 0      | 0      | 0      | 0      |
| Dehalobacter       | 1              | 9              | 0      | 0      | 0      | 0      | 0      | 0      | 1      | 0      | 0      | 0      | 0      | 0      | 1      | 0      | 0      | 0      | 0      | 0      |
| Dehalococcoides    | 2              | 41             | 0      | 0      | 0      | 0      | 0      | 0      | 0      | 0      | 0      | 0      | 1      | 0      | 0      | 0      | 0      | 0      | 0      | 0      |
| Dehalogenimonas    | 1              | 37             | 0      | 0      | 0      | 0      | 0      | 0      | 0      | 0      | 0      | 0      | 1      | 0      | 0      | 0      | 0      | 0      | 0      | 0      |
| Deinococcus        | 2              | 140            | 0      | 0      | 1      | 1      | 0      | 1      | 1      | 0      | 0      | 0      | 1      | 0      | 1      | 1      | 1      | 0      | 0      | 1      |
| Delftia            | 3              | 177            | 0      | 0      | 1      | 1      | 0      | 1      | 0      | 0      | 1      | 0      | 0      | 1      | 0      | 1      | 0      | 0      | 1      | 1      |
| Denitrovibrio      | 2              | 67             | 0      | 0      | 0      | 0      | 0      | 0      | 0      | 0      | 0      | 0      | 1      | 0      | 0      | 0      | 0      | 0      | 0      | 0      |
| Desulfarculus      | 2              | 92             | 0      | 0      | 1      | 0      | 0      | 0      | 0      | 0      | 0      | 0      | 1      | 0      | 0      | 0      | 0      | 0      | 0      | 1      |
| Desulfatibacillum  | 3              | 84             | 0      | 0      | 1      | 0      | 0      | 0      | 0      | 0      | 0      | 0      | 1      | 0      | 0      | 0      | 1      | 0      | 0      | 1      |
| Desulfitobacterium | 2              | 102            | 0      | 0      | 0      | 0      | 0      | 1      | 1      | 0      | 0      | 0      | 0      | 0      | 1      | 0      | 0      | 0      | 0      | 0      |
| Desulfobacca       | 2              | 65             | 0      | 0      | 0      | 0      | 0      | 0      | 1      | 0      | 0      | 0      | 1      | 0      | 0      | 0      | 0      | 0      | 0      | 0      |
| Desulfobacterium   | 2              | 113            | 0      | 0      | 0      | 0      | 0      | 0      | 0      | 0      | 0      | 0      | 0      | 0      | 1      | 0      | 1      | 0      | 0      | 1      |
| Desulfobacula      | 1              | 21             | 0      | 0      | 0      | 0      | 0      | 1      | 0      | 0      | 0      | 0      | 0      | 0      | 0      | 0      | 1      | 0      | 0      | 1      |
| Desulfobulbus      | 2              | 88             | 0      | 0      | 0      | 0      | 0      | 0      | 0      | 0      | 0      | 0      | 1      | 0      | 0      | 0      | 1      | 0      | 0      | 0      |
| Desulfocapsa       | 1              | 9              | 0      | 0      | 0      | 0      | 0      | 1      | 0      | 0      | 0      | 0      | 0      | 0      | 0      | 0      | 1      | 0      | 0      | 0      |
| Desulfococcus      | 2              | 80             | 0      | 0      | 1      | 0      | 0      | 0      | 0      | 0      | 0      | 0      | 1      | 0      | 0      | 0      | 1      | 0      | 0      | 0      |
| Desulfohalobium    | 2              | 52             | 0      | 0      | 0      | 0      | 0      | 0      | 0      | 0      | 0      | 0      | 1      | 0      | 0      | 0      | 0      | 0      | 0      | 0      |
| Desulfomicrobium   | 2              | 65             | 0      | 0      | 0      | 0      | 0      | 0      | 1      | 0      | 0      | 0      | 0      | 0      | 0      | 0      | 0      | 0      | 0      | 0      |
| Desulfomonile      | 1              | 25             | 0      | 0      | 0      | 0      | 0      | 0      | 1      | 0      | 0      | 1      | 1      | 0      | 0      | 0      | 0      | 0      | 0      | 1      |
| Desulforhabdus     | 1              | 2              | 0      | 0      | 0      | 0      | 0      | 0      | 0      | 0      | 0      | 0      | 0      | 0      | 0      | 0      | 0      | 0      | 0      | 0      |
| Desulfosporosinus  | 1              | 30             | 0      | 0      | 0      | 0      | 0      | 1      | 1      | 0      | 0      | 0      | 1      | 0      | 1      | 0      | 0      | 0      | 0      | 1      |
| Desulfotalea       | 2              | 66             | 0      | 0      | 0      | 0      | 0      | 0      | 0      | 0      | 0      | 0      | 0      | 0      | 0      | 0      | 1      | 0      | 0      | 0      |
| Desulfotomaculum   | 2              | 98             | 0      | 0      | 1      | 1      | 0      | 1      | 1      | 0      | 0      | 0      | 1      | 0      | 0      | 0      | 1      | 0      | 0      | 0      |
| Desulfovibrio      | 2              | 144            | 0      | 0      | 1      | 1      | 0      | 1      | 1      | 0      | 0      | 0      | 1      | 0      | 0      | 0      | 0      | 0      | 1      | 1      |
| Desulfurispirillum | 2              | 78             | 0      | 0      | 0      | 0      | 0      | 0      | 0      | 0      | 0      | 0      | 1      | 0      | 0      | 0      | 0      | 0      | 0      | 0      |
| Desulfurivibrio    | 2              | 71             | 0      | 0      | 0      | 0      | 0      | 0      | 0      | 0      | 0      | 0      | 0      | 0      | 0      | 0      | 0      | 0      | 0      | 0      |
| Desulfurobacterium | 2              | 53             | 0      | 0      | 0      | 0      | 0      | 0      | 0      | 0      | 0      | 0      | 0      | 0      | 0      | 0      | 0      | 0      | 0      | 0      |
| Desulfurococcus    | 1              | 11             | 0      | 0      | 1      | 0      | 0      | 1      | 1      | 0      | 0      | 0      | 1      | 0      | 0      | 0      | 0      | 0      | 0      | 0      |
| Diaphorobacter     | 1              | 16             | 0      | 0      | 0      | 0      | 0      | 0      | 0      | 0      | 0      | 0      | 0      | 0      | 0      | 0      | 0      | 0      | 0      | 0      |
| Dichelobacter      | 2              | 45             | 0      | 0      | 0      | 0      | 0      | 0      | 0      | 1      | 0      | 0      | 0      | 0      | 0      | 0      | 0      | 0      | 0      | 0      |
| Dickeya            | 2              | 155            | 0      | 0      | 1      | 0      | 1      | 1      | 1      | 0      | 1      | 0      | 1      | 0      | 0      | 0      | 0      | 0      | 0      | 1      |
| Dictyoglomus       | 2              | 62             | 1      | 0      | 0      | 0      | 0      | 0      | 1      | 0      | 0      | 0      | 1      | 0      | 0      | 0      | 0      | 0      | 0      | 0      |
| Dinoroseobacter    | 3              | 148            | 0      | 0      | 0      | 1      | 0      | 1      | 1      | 0      | 0      | 0      | 0      | 1      | 1      | 1      | 0      | 0      | 0      | 1      |
| Dokdonia           | 1              | 3              | 0      | 0      | 0      | 0      | 0      | 0      | 0      | 0      | 0      | 0      | 0      | 0      | 0      | 0      | 0      | 0      | 0      | 0      |
| Dorea              | 1              | 7              | 0      | 0      | 0      | 0      | 0      | 0      | 0      | 0      | 0      | 0      | 0      | 0      | 0      | 0      | 0      | 0      | 0      | 1      |
| Dyadobacter        | 2              | 83             | 1      | 0      | 0      | 0      | 0      | 0      | 0      | 0      | 0      | 0      | 0      | 1      | 0      | 0      | 0      | 0      | 0      | 0      |
| Echinicola         | 1              | 20             | 0      | 0      | 0      | 0      | 0      | 0      | 1      | 0      | 0      | 0      | 1      | 1      | 0      | 0      | 0      | 0      | 0      | 0      |
| Edwardsiella       | 2              | 126            | 1      | 0      | 0      | 1      | 0      | 1      | 1      | 0      | 0      | 0      | 1      | 0      | 1      | 0      | 0      | 0      | 0      | 0      |
| Eggerthella        | 1              | 51             | 0      | 0      | 1      | 0      | 0      | 0      | 0      | 0      | 0      | 0      | 0      | 0      | 0      | 0      | 0      | 0      | 0      | 1      |
| Ehrlichia          | 2              | 37             | 0      | 0      | 0      | 0      | 0      | 0      | 0      | 1      | 0      | 0      | 0      | 0      | 0      | 0      | 0      | 0      | 0      | 0      |
| Eikenella          | 1              | 4              | 0      | 0      | 0      | 0      | 0      | 0      | 0      | 0      | 0      | 0      | 0      | 0      | 0      | 0      | 0      | 0      | 0      | 0      |
| Elusimicrobium     | 2              | 44             | 0      | 0      | 0      | 0      | 0      | 0      | 0      | 0      | 0      | 0      | 0      | 0      | 0      | 0      | 0      | 0      | 0      | 0      |
| Emticicia          | 1              | 21             | 0      | 0      | 0      | 0      | 0      | 0      | 0      | 0      | 0      | 0      | 0      | 1      | 0      | 0      | 0      | 0      | 0      | 0      |
| Enhydrobacter      | 1              | 1              | 0      | 0      | 0      | 0      | 0      | 0      | 0      | 0      | 0      | 0      | 0      | 0      | 0      | 0      | 0      | 0      | 0      | 0      |
| Ensifer            | 1              | 2              | 0      | 0      | 0      | 0      | 0      | 0      | 0      | 0      | 0      | 0      | 0      | 0      | 0      | 0      | 0      | 0      | 0      | 0      |
| Enterobacter       | 2              | 202            | 0      | 0      | 1      | 1      | 1      | 1      | 1      | 0      | 0      | 0      | 1      | 0      | 0      | 0      | 0      | 0      | 1      | 1      |
| Enterobacteriaceae | 2              | 211            | 1      | 0      | 1      | 1      | 0      | 1      | 1      | 0      | 0      | 0      | 1      | 0      | 0      | 0      | 0      | 1      | 0      | 1      |
| Enterococcus       | 1              | 187            | 0      | 0      | 1      | 1      | 0      | 1      | 1      | 0      | 0      | 0      | 1      | 0      | 1      | 0      | 0      | 0      | 0      | 1      |



| Genus               | Cluster Number | Protein Counts | K01195 | K01253 | K01426 | K01428 | K01457 | K01464 | K01489 | K01500 | K01501 | K01502 | K01512 | K01555 | K01560 | K01561 | K01563 | K01564 | K01576 | K01607 |
|---------------------|----------------|----------------|--------|--------|--------|--------|--------|--------|--------|--------|--------|--------|--------|--------|--------|--------|--------|--------|--------|--------|
| Enterovibrio        | 1              | 15             | 0      | 0      | 0      | 0      | 0      | 0      | 0      | 0      | 0      | 0      | 0      | 0      | 0      | 0      | 0      | 0      | 0      | 0      |
| Erwinia             | 2              | 151            | 0      | 0      | 0      | 0      | 1      | 0      | 1      | 0      | 0      | 1      | 1      | 0      | 1      | 1      | 0      | 0      | 0      | 1      |
| Erysipelothrix      | 1              | 9              | 0      | 0      | 0      | 0      | 0      | 0      | 1      | 0      | 0      | 0      | 0      | 0      | 1      | 0      | 0      | 0      | 0      | 0      |
| Erysipelotrichaceae | 1              | 4              | 0      | 0      | 0      | 0      | 0      | 0      | 0      | 0      | 0      | 0      | 0      | 0      | 0      | 0      | 0      | 0      | 0      | 0      |
| Erythrobacter       | 2              | 80             | 0      | 0      | 1      | 0      | 0      | 0      | 1      | 0      | 0      | 0      | 0      | 0      | 1      | 0      | 1      | 0      | 0      | 0      |
| Escherichia         | 2              | 242            | 1      | 0      | 1      | 1      | 0      | 1      | 1      | 0      | 0      | 0      | 1      | 0      | 0      | 0      | 0      | 1      | 0      | 1      |
| Ethanoligenens      | 2              | 69             | 0      | 0      | 0      | 1      | 1      | 1      | 1      | 0      | 0      | 0      | 1      | 0      | 0      | 0      | 0      | 0      | 0      | 1      |
| Eubacteriaceae      | 1              | 2              | 0      | 0      | 0      | 0      | 0      | 0      | 0      | 0      | 0      | 0      | 0      | 0      | 0      | 0      | 0      | 0      | 0      | 0      |
| Eubacterium         | 2              | 103            | 1      | 0      | 0      | 0      | 0      | 1      | 1      | 0      | 0      | 0      | 1      | 0      | 1      | 0      | 0      | 0      | 0      | 1      |
| Eudoraea            | 1              | 4              | 0      | 0      | 0      | 0      | 0      | 0      | 0      | 0      | 0      | 0      | 0      | 0      | 0      | 0      | 0      | 0      | 0      | 0      |
| Euryarchaeota       | 1              | 1              | 0      | 0      | 0      | 0      | 0      | 0      | 0      | 0      | 0      | 0      | 0      | 0      | 0      | 0      | 0      | 0      | 0      | 0      |
| Exiguobacterium     | 2              | 93             | 0      | 0      | 1      | 0      | 0      | 0      | 1      | 0      | 0      | 0      | 1      | 0      | 1      | 0      | 0      | 0      | 0      | 1      |
| Faecalibacterium    | 1              | 12             | 1      | 0      | 0      | 0      | 0      | 0      | 1      | 0      | 0      | 0      | 0      | 0      | 0      | 0      | 0      | 0      | 0      | 0      |
| Ferrimonas          | 2              | 115            | 0      | 0      | 0      | 0      | 0      | 0      | 1      | 0      | 0      | 0      | 1      | 1      | 0      | 0      | 0      | 0      | 0      | 0      |
| Ferroglobus         | 1              | 14             | 0      | 0      | 1      | 0      | 0      | 0      | 0      | 0      | 0      | 0      | 1      | 0      | 0      | 0      | 0      | 0      | 0      | 0      |
| Ferroplasma         | 1              | 11             | 0      | 0      | 0      | 0      | 0      | 1      | 0      | 0      | 0      | 0      | 1      | 0      | 0      | 0      | 0      | 0      | 1      | 0      |
| Fervidicoccus       | 1              | 7              | 0      | 0      | 0      | 0      | 0      | 0      | 1      | 0      | 0      | 0      | 1      | 0      | 0      | 0      | 0      | 0      | 0      | 0      |
| Fervidobacterium    | 2              | 54             | 0      | 0      | 1      | 0      | 0      | 0      | 1      | 0      | 0      | 0      | 1      | 0      | 0      | 0      | 0      | 0      | 0      | 0      |
| Fibrella            | 1              | 17             | 0      | 0      | 1      | 0      | 0      | 0      | 0      | 0      | 0      | 0      | 0      | 1      | 0      | 0      | 0      | 0      | 0      | 0      |
| Fibroacter          | 2              | 52             | 0      | 0      | 0      | 0      | 0      | 0      | 0      | 0      | 0      | 0      | 0      | 0      | 0      | 0      | 0      | 0      | 0      | 0      |
| Filifactor          | 1              | 9              | 0      | 0      | 0      | 0      | 0      | 0      | 1      | 0      | 0      | 0      | 0      | 0      | 0      | 0      | 0      | 0      | 0      | 0      |
| Finegoldia          | 2              | 55             | 0      | 0      | 0      | 0      | 0      | 0      | 1      | 0      | 0      | 0      | 0      | 0      | 0      | 0      | 0      | 0      | 0      | 0      |
| Firmicutes          | 1              | 15             | 0      | 0      | 1      | 0      | 0      | 0      | 1      | 0      | 0      | 0      | 0      | 0      | 1      | 0      | 0      | 0      | 0      | 1      |
| Fischerella         | 1              | 15             | 0      | 0      | 1      | 1      | 0      | 0      | 0      | 0      | 0      | 0      | 0      | 0      | 0      | 0      | 0      | 0      | 0      | 0      |
| Flavobacteria       | 1              | 7              | 0      | 0      | 0      | 0      | 0      | 0      | 0      | 0      | 0      | 0      | 0      | 0      | 0      | 0      | 0      | 0      | 0      | 0      |
| Flavobacteriaceae   | 2              | 69             | 0      | 0      | 0      | 0      | 0      | 0      | 1      | 0      | 0      | 0      | 0      | 1      | 1      | 0      | 0      | 0      | 0      | 0      |
| Flavobacteriales    | 1              | 3              | 0      | 0      | 0      | 0      | 0      | 0      | 0      | 0      | 0      | 0      | 0      | 0      | 0      | 0      | 0      | 0      | 0      | 0      |
| Flavobacterium      | 2              | 103            | 1      | 0      | 0      | 1      | 0      | 0      | 1      | 0      | 0      | 1      | 0      | 1      | 1      | 0      | 0      | 0      | 0      | 0      |
| Flexibacter         | 1              | 17             | 0      | 0      | 1      | 0      | 0      | 0      | 1      | 0      | 0      | 0      | 0      | 1      | 1      | 0      | 0      | 0      | 0      | 0      |
| Flexistipes         | 1              | 11             | 0      | 0      | 0      | 0      | 0      | 0      | 0      | 0      | 0      | 0      | 1      | 0      | 1      | 0      | 0      | 0      | 0      | 0      |
| Fluoribacter        | 1              | 6              | 0      | 0      | 0      | 0      | 0      | 0      | 0      | 0      | 0      | 0      | 0      | 0      | 0      | 0      | 0      | 0      | 0      | 0      |
| Fluviicola          | 2              | 69             | 0      | 0      | 0      | 0      | 0      | 0      | 1      | 0      | 0      | 0      | 0      | 1      | 0      | 0      | 0      | 0      | 0      | 0      |
| Formosa             | 1              | 2              | 0      | 0      | 0      | 0      | 0      | 0      | 0      | 0      | 0      | 0      | 0      | 0      | 0      | 0      | 0      | 0      | 0      | 0      |
| Francisella         | 2              | 88             | 0      | 0      | 0      | 1      | 0      | 0      | 1      | 0      | 0      | 0      | 0      | 0      | 0      | 0      | 0      | 0      | 0      | 0      |
| Frankia             | 3              | 202            | 1      | 1      | 1      | 1      | 1      | 1      | 1      | 1      | 0      | 0      | 1      | 1      | 1      | 1      | 0      | 0      | 1      | 1      |
| Frateuria           | 1              | 25             | 0      | 0      | 0      | 1      | 0      | 0      | 1      | 0      | 1      | 0      | 0      | 0      | 0      | 0      | 0      | 0      | 0      | 1      |
| Fructobacillus      | 1              | 2              | 0      | 0      | 0      | 0      | 0      | 0      | 0      | 0      | 0      | 0      | 0      | 0      | 0      | 0      | 0      | 0      | 0      | 0      |
| Fulvimarina         | 1              | 2              | 0      | 0      | 0      | 0      | 0      | 0      | 0      | 0      | 0      | 0      | 0      | 0      | 0      | 0      | 0      | 0      | 0      | 0      |
| Fusobacterium       | 1              | 48             | 0      | 0      | 0      | 0      | 0      | 0      | 0      | 0      | 0      | 0      | 0      | 0      | 0      | 0      | 0      | 0      | 0      | 0      |
| Gallibacterium      | 2              | 87             | 0      | 0      | 0      | 0      | 0      | 0      | 1      | 0      | 0      | 0      | 1      | 0      | 0      | 0      | 0      | 0      | 0      | 0      |
| Gallionella         | 2              | 67             | 0      | 0      | 0      | 0      | 1      | 0      | 0      | 0      | 1      | 0      | 0      | 0      | 0      | 0      | 0      | 0      | 0      | 0      |
| Gammaproteobacteria | 1              | 9              | 0      | 0      | 0      | 0      | 0      | 0      | 0      | 0      | 0      | 0      | 0      | 0      | 0      | 0      | 0      | 0      | 0      | 0      |
| Gardnerella         | 1              | 31             | 0      | 0      | 0      | 0      | 0      | 0      | 0      | 0      | 0      | 0      | 0      | 0      | 0      | 0      | 0      | 0      | 0      | 0      |
| Geitlerinema        | 1              | 9              | 0      | 0      | 1      | 1      | 0      | 0      | 0      | 0      | 0      | 0      | 1      | 0      | 0      | 0      | 0      | 0      | 0      | 1      |
| Gemmatimonas        | 2              | 93             | 0      | 0      | 1      | 0      | 0      | 0      | 1      | 0      | 0      | 0      | 0      | 1      | 0      | 0      | 1      | 0      | 0      | 0      |
| Geobacillus         | 2              | 168            | 0      | 0      | 1      | 1      | 0      | 1      | 1      | 0      | 1      | 0      | 1      | 0      | 0      | 0      | 0      | 0      | 0      | 0      |
| Geobacter           | 2              | 150            | 0      | 0      | 0      | 0      | 0      | 0      | 1      | 0      | 0      | 0      | 1      | 0      | 1      | 0      | 1      | 0      | 0      | 1      |
| Geodermatophilus    | 2              | 136            | 0      | 0      | 1      | 1      | 0      | 0      | 1      | 0      | 0      | 0      | 1      | 1      | 1      | 1      | 1      | 0      | 0      | 1      |
| Geopsychrobacter    | 1              | 2              | 0      | 0      | 0      | 0      | 0      | 0      | 0      | 0      | 0      | 0      | 0      | 0      | 0      | 0      | 0      | 0      | 0      | 0      |
| Gillisia            | 1              | 11             | 0      | 0      | 0      | 0      | 0      | 0      | 0      | 0      | 0      | 0      | 0      | 0      | 0      | 0      | 0      | 0      | 0      | 0      |
| Gilvimarinus        | 1              | 4              | 0      | 0      | 1      | 0      | 0      | 0      | 0      | 0      | 0      | 0      | 0      | 0      | 0      | 0      | 0      | 0      | 0      | 0      |
| Glaciecola          | 2              | 117            | 0      | 0      | 1      | 1      | 0      | 0      | 1      | 0      | 1      | 0      | 0      | 1      | 1      | 0      | 1      | 0      | 0      | 0      |

| Genus             | Cluster Number | Protein Counts | K01195 | K01253 | K01426 | K01428 | K01457 | K01464 | K01489 | K01500 | K01501 | K01502 | K01512 | K01555 | K01560 | K01561 | K01563 | K01564 | K01576 | K01607 |
|-------------------|----------------|----------------|--------|--------|--------|--------|--------|--------|--------|--------|--------|--------|--------|--------|--------|--------|--------|--------|--------|--------|
| Gloeobacter       | 2              | 67             | 0      | 0      | 1      | 0      | 1      | 0      | 0      | 0      | 0      | 0      | 1      | 0      | 0      | 0      | 0      | 0      | 0      | 0      |
| Gloeocapsa        | 1              | 20             | 0      | 0      | 1      | 1      | 0      | 1      | 0      | 0      | 0      | 0      | 1      | 0      | 1      | 0      | 0      | 0      | 0      | 0      |
| Gloeotheca        | 1              | 1              | 0      | 0      | 0      | 0      | 0      | 0      | 0      | 0      | 0      | 0      | 0      | 0      | 0      | 0      | 0      | 0      | 0      | 0      |
| Gluconacetobacter | 2              | 96             | 0      | 0      | 1      | 0      | 0      | 1      | 1      | 0      | 1      | 1      | 0      | 0      | 1      | 1      | 0      | 0      | 1      | 1      |
| Gluconobacter     | 2              | 76             | 0      | 0      | 0      | 0      | 0      | 1      | 1      | 0      | 0      | 1      | 0      | 0      | 1      | 0      | 0      | 0      | 0      | 0      |
| Gordonia          | 1              | 158            | 0      | 0      | 1      | 1      | 1      | 1      | 1      | 0      | 0      | 0      | 1      | 0      | 1      | 0      | 1      | 0      | 1      | 1      |
| Gordonibacter     | 1              | 32             | 0      | 0      | 1      | 0      | 0      | 0      | 0      | 0      | 0      | 0      | 0      | 0      | 1      | 0      | 0      | 0      | 0      | 0      |
| Gramella          | 2              | 104            | 0      | 0      | 0      | 0      | 0      | 0      | 1      | 1      | 0      | 0      | 0      | 1      | 1      | 0      | 0      | 0      | 0      | 0      |
| Granulibacter     | 2              | 90             | 0      | 1      | 1      | 1      | 1      | 0      | 0      | 1      | 1      | 0      | 1      | 0      | 0      | 0      | 0      | 0      | 0      | 1      |
| Granulicella      | 2              | 98             | 1      | 0      | 0      | 0      | 1      | 1      | 1      | 0      | 0      | 0      | 1      | 1      | 0      | 0      | 0      | 0      | 1      | 1      |
| Grimontia         | 1              | 9              | 0      | 0      | 0      | 0      | 0      | 0      | 0      | 0      | 0      | 0      | 0      | 0      | 0      | 0      | 0      | 0      | 0      | 0      |
| Haemophilus       | 2              | 117            | 1      | 0      | 0      | 1      | 0      | 0      | 1      | 0      | 0      | 0      | 1      | 0      | 0      | 0      | 0      | 0      | 0      | 1      |
| Hafnia            | 1              | 29             | 0      | 0      | 0      | 0      | 0      | 0      | 0      | 0      | 0      | 0      | 0      | 0      | 0      | 0      | 0      | 0      | 0      | 0      |
| Hahella           | 3              | 130            | 0      | 0      | 1      | 1      | 0      | 0      | 0      | 0      | 1      | 0      | 1      | 0      | 0      | 0      | 1      | 0      | 0      | 0      |
| Halalkalicoccus   | 1              | 18             | 0      | 0      | 0      | 1      | 0      | 1      | 1      | 0      | 0      | 0      | 1      | 0      | 1      | 0      | 0      | 0      | 1      | 0      |
| Halanaerobium     | 2              | 89             | 1      | 0      | 1      | 0      | 0      | 1      | 1      | 0      | 1      | 0      | 1      | 0      | 0      | 0      | 0      | 0      | 0      | 0      |
| Haliangium        | 2              | 108            | 0      | 0      | 1      | 1      | 0      | 1      | 1      | 0      | 0      | 1      | 1      | 0      | 0      | 0      | 1      | 0      | 1      | 0      |
| Haliscomenobacter | 2              | 107            | 1      | 0      | 0      | 0      | 0      | 0      | 1      | 0      | 0      | 0      | 0      | 1      | 1      | 0      | 0      | 0      | 0      | 0      |
| Haloarcula        | 1              | 22             | 0      | 0      | 1      | 1      | 0      | 1      | 1      | 0      | 1      | 0      | 1      | 0      | 1      | 0      | 0      | 0      | 0      | 0      |
| Halobacillus      | 1              | 19             | 0      | 0      | 1      | 1      | 0      | 1      | 1      | 0      | 0      | 0      | 1      | 0      | 1      | 0      | 0      | 0      | 0      | 0      |
| Halobacteriaceae  | 1              | 1              | 0      | 0      | 0      | 0      | 0      | 0      | 0      | 0      | 0      | 0      | 0      | 0      | 0      | 0      | 0      | 0      | 0      | 0      |
| Halobacterium     | 1              | 10             | 0      | 0      | 0      | 0      | 0      | 0      | 1      | 0      | 0      | 0      | 0      | 0      | 0      | 0      | 0      | 0      | 0      | 0      |
| Halobacteroides   | 1              | 14             | 0      | 0      | 0      | 0      | 0      | 1      | 1      | 0      | 0      | 0      | 1      | 0      | 0      | 0      | 0      | 0      | 0      | 0      |
| Haloferax         | 1              | 20             | 0      | 0      | 0      | 1      | 0      | 1      | 1      | 0      | 0      | 0      | 1      | 0      | 1      | 0      | 1      | 0      | 0      | 0      |
| Halogeometricum   | 1              | 12             | 0      | 0      | 0      | 0      | 0      | 0      | 1      | 0      | 0      | 0      | 1      | 0      | 0      | 0      | 0      | 0      | 0      | 0      |
| Halomicrobium     | 1              | 10             | 0      | 0      | 0      | 0      | 0      | 0      | 1      | 0      | 0      | 0      | 1      | 0      | 0      | 0      | 0      | 0      | 0      | 0      |
| Halomonas         | 1              | 149            | 0      | 0      | 1      | 1      | 0      | 0      | 1      | 0      | 0      | 0      | 1      | 0      | 1      | 0      | 0      | 0      | 1      | 1      |
| Halopiger         | 1              | 16             | 0      | 0      | 0      | 0      | 0      | 0      | 1      | 0      | 0      | 0      | 1      | 0      | 1      | 0      | 0      | 0      | 1      | 0      |
| Haloquadratum     | 1              | 19             | 0      | 0      | 0      | 1      | 0      | 1      | 1      | 0      | 0      | 0      | 1      | 0      | 1      | 0      | 0      | 0      | 0      | 0      |
| Halorhabdus       | 1              | 10             | 1      | 0      | 0      | 0      | 0      | 0      | 1      | 0      | 0      | 0      | 1      | 0      | 0      | 0      | 0      | 0      | 0      | 0      |
| Halorhodospira    | 2              | 71             | 0      | 0      | 0      | 0      | 1      | 0      | 0      | 0      | 1      | 0      | 1      | 0      | 1      | 0      | 0      | 0      | 0      | 0      |
| Halorubrum        | 1              | 16             | 0      | 0      | 1      | 0      | 0      | 1      | 1      | 0      | 0      | 0      | 1      | 0      | 1      | 0      | 0      | 0      | 0      | 0      |
| Haloterrigena     | 1              | 19             | 1      | 0      | 1      | 1      | 0      | 1      | 1      | 0      | 0      | 0      | 1      | 0      | 1      | 0      | 1      | 0      | 1      | 0      |
| Halothece         | 1              | 9              | 0      | 0      | 0      | 1      | 0      | 0      | 0      | 0      | 0      | 0      | 1      | 0      | 0      | 0      | 0      | 0      | 0      | 0      |
| Halothermothrix   | 2              | 50             | 0      | 0      | 0      | 0      | 0      | 0      | 1      | 0      | 0      | 0      | 1      | 0      | 0      | 0      | 0      | 0      | 0      | 0      |
| Halothiobacillus  | 2              | 65             | 0      | 0      | 1      | 0      | 1      | 0      | 0      | 0      | 0      | 0      | 0      | 0      | 0      | 0      | 0      | 0      | 0      | 1      |
| Halovivax         | 1              | 12             | 0      | 0      | 1      | 0      | 0      | 0      | 1      | 0      | 0      | 0      | 1      | 0      | 0      | 0      | 0      | 0      | 1      | 0      |
| Helicobacter      | 2              | 79             | 0      | 0      | 1      | 1      | 0      | 0      | 0      | 0      | 0      | 0      | 1      | 0      | 0      | 0      | 0      | 1      | 0      | 1      |
| Heliobacillus     | 1              | 4              | 0      | 0      | 0      | 0      | 0      | 0      | 0      | 0      | 0      | 0      | 0      | 0      | 0      | 0      | 0      | 0      | 0      | 0      |
| Heliobacterium    | 2              | 51             | 0      | 0      | 0      | 0      | 0      | 1      | 1      | 0      | 0      | 0      | 0      | 0      | 0      | 0      | 0      | 0      | 0      | 0      |
| Herbaspirillum    | 2              | 172            | 0      | 0      | 1      | 1      | 1      | 0      | 0      | 0      | 1      | 0      | 0      | 1      | 1      | 0      | 0      | 0      | 1      | 1      |
| Herminiimonas     | 3              | 89             | 0      | 0      | 1      | 0      | 0      | 0      | 0      | 0      | 1      | 0      | 0      | 0      | 1      | 1      | 0      | 0      | 0      | 0      |
| Herpetosiphon     | 3              | 90             | 0      | 0      | 0      | 1      | 0      | 0      | 1      | 0      | 0      | 0      | 1      | 1      | 1      | 0      | 0      | 0      | 0      | 0      |
| Hippea            | 2              | 44             | 0      | 0      | 0      | 0      | 0      | 0      | 0      | 0      | 0      | 0      | 1      | 0      | 0      | 0      | 0      | 0      | 0      | 0      |
| Hirschia          | 2              | 102            | 0      | 0      | 0      | 1      | 0      | 0      | 0      | 0      | 0      | 0      | 0      | 0      | 1      | 0      | 0      | 0      | 0      | 1      |
| Histophilus       | 2              | 72             | 1      | 0      | 0      | 0      | 0      | 0      | 1      | 0      | 0      | 0      | 0      | 0      | 0      | 0      | 0      | 0      | 0      | 1      |
| Hoeflea           | 1              | 16             | 0      | 0      | 0      | 0      | 0      | 0      | 0      | 0      | 0      | 0      | 0      | 0      | 0      | 0      | 0      | 0      | 0      | 0      |
| Hydrogenivirga    | 1              | 2              | 0      | 0      | 0      | 0      | 0      | 0      | 0      | 0      | 0      | 0      | 0      | 0      | 0      | 0      | 0      | 0      | 0      | 0      |
| Hydrogenobacter   | 2              | 55             | 0      | 0      | 0      | 0      | 0      | 0      | 0      | 0      | 0      | 0      | 1      | 0      | 0      | 0      | 0      | 0      | 0      | 0      |
| Hydrogenobaculum  | 2              | 44             | 0      | 0      | 0      | 0      | 0      | 0      | 0      | 0      | 0      | 0      | 1      | 0      | 0      | 0      | 0      | 0      | 0      | 0      |
| Hydrogenophaga    | 1              | 9              | 0      | 0      | 0      | 0      | 0      | 0      | 0      | 0      | 0      | 0      | 0      | 0      | 0      | 0      | 0      | 0      | 0      | 0      |
| Hylemonella       | 1              | 4              | 0      | 0      | 0      | 0      | 0      | 0      | 0      | 0      | 0      | 0      | 0      | 0      | 0      | 0      | 0      | 0      | 0      | 0      |

| Genus                 | Cluster Number | Protein Counts | K01195 | K01253 | K01426 | K01428 | K01457 | K01464 | K01489 | K01500 | K01501 | K01502 | K01512 | K01555 | K01560 | K01561 | K01563 | K01564 | K01576 | K01607 |
|-----------------------|----------------|----------------|--------|--------|--------|--------|--------|--------|--------|--------|--------|--------|--------|--------|--------|--------|--------|--------|--------|--------|
| Hyperthermus          | 1              | 6              | 0      | 0      | 0      | 0      | 0      | 0      | 1      | 0      | 0      | 0      | 0      | 0      | 0      | 0      | 0      | 0      | 0      | 0      |
| Hyphomicrobium        | 2              | 93             | 0      | 0      | 1      | 1      | 0      | 0      | 0      | 0      | 0      | 1      | 0      | 0      | 1      | 0      | 0      | 0      | 0      | 0      |
| Hyphomonas            | 3              | 105            | 0      | 1      | 1      | 0      | 1      | 0      | 1      | 0      | 0      | 0      | 0      | 0      | 0      | 0      | 1      | 0      | 0      | 1      |
| Ideonella             | 1              | 18             | 0      | 0      | 0      | 0      | 0      | 0      | 0      | 0      | 0      | 0      | 0      | 0      | 0      | 0      | 0      | 0      | 0      | 0      |
| Idiomarina            | 2              | 86             | 0      | 0      | 0      | 0      | 0      | 0      | 0      | 0      | 0      | 0      | 0      | 0      | 1      | 0      | 0      | 0      | 0      | 0      |
| Ignavibacterium       | 1              | 14             | 1      | 0      | 0      | 0      | 0      | 0      | 1      | 0      | 0      | 0      | 1      | 0      | 0      | 0      | 0      | 0      | 0      | 1      |
| Ignicoccus            | 1              | 5              | 0      | 0      | 0      | 0      | 0      | 0      | 0      | 0      | 0      | 0      | 0      | 0      | 0      | 0      | 0      | 0      | 0      | 0      |
| Ignisphaera           | 1              | 8              | 1      | 0      | 0      | 0      | 0      | 0      | 0      | 0      | 0      | 0      | 1      | 0      | 0      | 0      | 0      | 0      | 0      | 0      |
| Ilyobacter            | 2              | 85             | 0      | 0      | 0      | 0      | 0      | 1      | 1      | 0      | 0      | 0      | 1      | 0      | 1      | 0      | 0      | 0      | 0      | 0      |
| Intrasporangium       | 2              | 114            | 0      | 0      | 1      | 0      | 0      | 0      | 1      | 0      | 0      | 0      | 1      | 1      | 1      | 0      | 0      | 0      | 0      | 0      |
| Isoptericola          | 1              | 18             | 0      | 0      | 1      | 1      | 0      | 0      | 1      | 0      | 0      | 0      | 1      | 0      | 1      | 0      | 0      | 0      | 0      | 0      |
| Isosphaera            | 2              | 75             | 0      | 0      | 0      | 0      | 0      | 0      | 1      | 0      | 0      | 0      | 0      | 0      | 0      | 0      | 1      | 0      | 0      | 0      |
| Jannaschia            | 3              | 151            | 0      | 0      | 1      | 1      | 1      | 1      | 1      | 0      | 1      | 0      | 0      | 1      | 1      | 1      | 1      | 0      | 0      | 1      |
| Janthinobacterium     | 2              | 99             | 0      | 0      | 0      | 1      | 1      | 0      | 0      | 0      | 1      | 1      | 0      | 0      | 1      | 1      | 0      | 0      | 0      | 0      |
| Jonesia               | 2              | 56             | 0      | 0      | 0      | 0      | 0      | 0      | 1      | 0      | 0      | 0      | 0      | 0      | 0      | 0      | 0      | 0      | 0      | 0      |
| Joostella             | 1              | 3              | 0      | 0      | 0      | 0      | 0      | 0      | 0      | 0      | 0      | 0      | 0      | 0      | 0      | 0      | 0      | 0      | 0      | 0      |
| Kaistia               | 1              | 2              | 0      | 0      | 0      | 0      | 0      | 0      | 0      | 0      | 0      | 0      | 0      | 0      | 0      | 0      | 0      | 0      | 0      | 0      |
| Kangiella             | 2              | 84             | 0      | 0      | 0      | 0      | 0      | 0      | 0      | 0      | 1      | 0      | 0      | 0      | 0      | 0      | 0      | 0      | 0      | 0      |
| Ketogulonicigenium    | 2              | 102            | 0      | 0      | 0      | 1      | 0      | 1      | 1      | 0      | 0      | 0      | 0      | 0      | 0      | 0      | 0      | 0      | 0      | 1      |
| Kineococcus           | 1              | 24             | 0      | 0      | 0      | 1      | 1      | 1      | 1      | 0      | 0      | 0      | 0      | 0      | 0      | 0      | 0      | 0      | 0      | 0      |
| Kinetoplastibacterium | 1              | 2              | 0      | 0      | 0      | 0      | 0      | 0      | 0      | 0      | 0      | 0      | 0      | 0      | 0      | 0      | 0      | 0      | 0      | 0      |
| Kingella              | 1              | 4              | 0      | 0      | 0      | 0      | 0      | 0      | 0      | 0      | 0      | 0      | 0      | 0      | 0      | 0      | 0      | 0      | 0      | 0      |
| Kitasatospora         | 1              | 36             | 0      | 0      | 1      | 1      | 0      | 0      | 1      | 0      | 0      | 0      | 1      | 1      | 0      | 0      | 0      | 0      | 1      | 1      |
| Klebsiella            | 3              | 222            | 0      | 0      | 1      | 1      | 1      | 1      | 1      | 0      | 0      | 0      | 1      | 0      | 0      | 0      | 0      | 0      | 1      | 1      |
| Kluyvera              | 1              | 1              | 0      | 0      | 0      | 0      | 0      | 0      | 0      | 0      | 0      | 0      | 0      | 0      | 0      | 0      | 0      | 0      | 0      | 0      |
| Kocuria               | 2              | 87             | 0      | 0      | 0      | 1      | 0      | 0      | 1      | 0      | 0      | 0      | 1      | 0      | 0      | 1      | 0      | 0      | 0      | 1      |
| Kordia                | 1              | 5              | 0      | 0      | 0      | 0      | 0      | 0      | 0      | 0      | 0      | 0      | 0      | 0      | 0      | 0      | 0      | 0      | 0      | 0      |
| Kosmotoga             | 2              | 61             | 0      | 0      | 0      | 0      | 0      | 1      | 1      | 0      | 0      | 0      | 1      | 0      | 0      | 0      | 0      | 0      | 0      | 0      |
| Kribbella             | 2              | 99             | 0      | 0      | 1      | 0      | 0      | 1      | 1      | 0      | 0      | 0      | 0      | 1      | 0      | 1      | 1      | 0      | 0      | 0      |
| Krokinobacter         | 2              | 90             | 0      | 0      | 1      | 0      | 0      | 0      | 1      | 0      | 1      | 0      | 0      | 1      | 1      | 0      | 0      | 0      | 0      | 0      |
| Kyrpidia              | 2              | 113            | 0      | 0      | 1      | 1      | 0      | 0      | 1      | 0      | 0      | 0      | 1      | 0      | 0      | 0      | 0      | 0      | 0      | 0      |
| Kytococcus            | 2              | 70             | 0      | 0      | 0      | 0      | 0      | 0      | 1      | 0      | 0      | 0      | 0      | 1      | 0      | 0      | 0      | 0      | 0      | 0      |
| Labrenzia             | 1              | 4              | 0      | 0      | 0      | 0      | 0      | 0      | 0      | 0      | 0      | 0      | 0      | 0      | 0      | 0      | 0      | 0      | 0      | 0      |
| Lachnoanaerobaculum   | 1              | 1              | 0      | 0      | 0      | 0      | 0      | 0      | 0      | 0      | 0      | 0      | 0      | 0      | 0      | 0      | 0      | 0      | 0      | 0      |
| Lachnospiraceae       | 1              | 51             | 0      | 0      | 0      | 0      | 0      | 1      | 0      | 0      | 0      | 0      | 1      | 0      | 0      | 0      | 0      | 0      | 0      | 0      |
| Lacinutrix            | 1              | 20             | 0      | 0      | 1      | 0      | 0      | 0      | 1      | 0      | 1      | 0      | 0      | 1      | 1      | 0      | 0      | 0      | 0      | 0      |
| Lactobacillus         | 2              | 119            | 1      | 0      | 1      | 0      | 0      | 0      | 1      | 0      | 0      | 0      | 1      | 0      | 1      | 0      | 0      | 0      | 0      | 1      |
| Lactococcus           | 2              | 82             | 0      | 0      | 1      | 0      | 0      | 0      | 1      | 0      | 0      | 0      | 1      | 0      | 1      | 0      | 0      | 0      | 0      | 1      |
| Lamprocystis          | 1              | 2              | 0      | 0      | 0      | 0      | 0      | 0      | 0      | 0      | 0      | 0      | 0      | 0      | 0      | 0      | 0      | 0      | 0      | 0      |
| Laribacter            | 2              | 80             | 0      | 0      | 0      | 1      | 0      | 0      | 0      | 0      | 1      | 0      | 1      | 0      | 0      | 0      | 0      | 0      | 0      | 1      |
| Lawsonia              | 2              | 33             | 0      | 0      | 0      | 0      | 0      | 0      | 0      | 0      | 0      | 0      | 0      | 0      | 0      | 0      | 0      | 0      | 0      | 0      |
| Leadbetterella        | 2              | 79             | 0      | 0      | 0      | 0      | 0      | 0      | 1      | 0      | 0      | 0      | 0      | 1      | 0      | 0      | 0      | 0      | 0      | 0      |
| Leeuwenhoekiiella     | 1              | 2              | 0      | 0      | 0      | 0      | 0      | 0      | 0      | 0      | 0      | 0      | 0      | 0      | 0      | 0      | 0      | 0      | 0      | 0      |
| Legionella            | 2              | 117            | 0      | 0      | 1      | 0      | 0      | 0      | 1      | 0      | 1      | 0      | 1      | 0      | 1      | 0      | 0      | 0      | 1      | 0      |
| Leifsonia             | 2              | 48             | 0      | 0      | 1      | 0      | 0      | 0      | 1      | 0      | 0      | 0      | 0      | 0      | 0      | 0      | 0      | 0      | 0      | 0      |
| Leptolyngbya          | 1              | 10             | 0      | 0      | 0      | 1      | 0      | 0      | 0      | 0      | 0      | 1      | 1      | 0      | 0      | 0      | 0      | 0      | 0      | 0      |
| Leptospira            | 2              | 76             | 0      | 0      | 1      | 0      | 0      | 0      | 0      | 0      | 0      | 0      | 1      | 0      | 1      | 0      | 0      | 0      | 0      | 0      |
| Leptospirillum        | 1              | 10             | 0      | 0      | 0      | 0      | 0      | 0      | 0      | 0      | 0      | 0      | 1      | 0      | 0      | 0      | 0      | 0      | 0      | 1      |
| Leptothrix            | 3              | 186            | 0      | 0      | 0      | 1      | 1      | 0      | 0      | 0      | 1      | 0      | 1      | 1      | 1      | 1      | 0      | 0      | 0      | 1      |
| Leptotrichia          | 2              | 43             | 0      | 0      | 0      | 0      | 0      | 0      | 1      | 0      | 0      | 0      | 0      | 0      | 0      | 0      | 0      | 0      | 0      | 0      |
| Leucobacter           | 1              | 2              | 0      | 0      | 0      | 0      | 0      | 0      | 0      | 0      | 0      | 0      | 0      | 0      | 0      | 0      | 0      | 0      | 0      | 0      |
| Leuconostoc           | 2              | 64             | 0      | 0      | 0      | 0      | 0      | 0      | 1      | 0      | 0      | 0      | 1      | 0      | 0      | 0      | 0      | 0      | 0      | 1      |

| Genus                | Cluster Number | Protein Counts | K01195 | K01253 | K01426 | K01428 | K01457 | K01464 | K01489 | K01500 | K01501 | K01502 | K01512 | K01555 | K01560 | K01561 | K01563 | K01564 | K01576 | K01607 |
|----------------------|----------------|----------------|--------|--------|--------|--------|--------|--------|--------|--------|--------|--------|--------|--------|--------|--------|--------|--------|--------|--------|
| Liberibacter         | 1              | 4              | 0      | 0      | 0      | 0      | 0      | 0      | 0      | 0      | 0      | 0      | 0      | 0      | 0      | 0      | 0      | 0      | 0      | 0      |
| Limnohabitans        | 1              | 11             | 0      | 0      | 0      | 0      | 0      | 0      | 0      | 0      | 0      | 0      | 0      | 0      | 0      | 0      | 0      | 0      | 0      | 0      |
| Listeria             | 2              | 77             | 0      | 0      | 1      | 0      | 0      | 0      | 1      | 0      | 0      | 0      | 1      | 0      | 0      | 0      | 0      | 0      | 0      | 1      |
| Listeriaceae         | 1              | 6              | 0      | 0      | 0      | 0      | 0      | 0      | 0      | 0      | 0      | 0      | 0      | 0      | 0      | 0      | 0      | 0      | 0      | 0      |
| Listonella           | 1              | 38             | 0      | 0      | 0      | 0      | 0      | 0      | 1      | 0      | 0      | 0      | 1      | 0      | 0      | 0      | 0      | 0      | 0      | 0      |
| Loktanella           | 1              | 3              | 0      | 0      | 0      | 0      | 0      | 0      | 0      | 0      | 0      | 0      | 0      | 0      | 0      | 0      | 0      | 0      | 0      | 0      |
| Lysinibacillus       | 2              | 97             | 0      | 0      | 0      | 1      | 0      | 1      | 1      | 0      | 0      | 0      | 1      | 0      | 1      | 0      | 0      | 0      | 0      | 0      |
| Macrococcus          | 2              | 60             | 0      | 0      | 0      | 0      | 0      | 0      | 1      | 0      | 0      | 0      | 0      | 0      | 0      | 0      | 0      | 0      | 0      | 0      |
| Magnetococcus        | 2              | 64             | 0      | 0      | 0      | 1      | 0      | 0      | 0      | 0      | 1      | 0      | 0      | 0      | 0      | 0      | 0      | 0      | 0      | 0      |
| Magnetospirillum     | 2              | 113            | 0      | 0      | 1      | 0      | 0      | 0      | 0      | 0      | 0      | 0      | 0      | 0      | 1      | 0      | 0      | 0      | 0      | 1      |
| Mahella              | 2              | 58             | 0      | 0      | 0      | 0      | 0      | 0      | 1      | 0      | 0      | 0      | 0      | 0      | 0      | 0      | 0      | 0      | 0      | 1      |
| Mannheimia           | 2              | 85             | 0      | 0      | 0      | 0      | 0      | 0      | 1      | 0      | 0      | 0      | 1      | 0      | 0      | 0      | 0      | 0      | 0      | 1      |
| Maribacter           | 3              | 87             | 0      | 0      | 0      | 0      | 0      | 0      | 1      | 0      | 1      | 0      | 0      | 1      | 1      | 0      | 1      | 0      | 0      | 0      |
| Maricaulis           | 3              | 87             | 0      | 0      | 0      | 0      | 0      | 0      | 0      | 0      | 1      | 0      | 0      | 0      | 0      | 0      | 0      | 0      | 0      | 0      |
| Marichromatium       | 1              | 2              | 0      | 0      | 0      | 0      | 0      | 0      | 0      | 0      | 0      | 0      | 0      | 0      | 0      | 0      | 0      | 0      | 0      | 0      |
| Marinithermus        | 2              | 77             | 0      | 0      | 1      | 0      | 0      | 0      | 1      | 0      | 0      | 0      | 1      | 0      | 1      | 0      | 0      | 0      | 0      | 1      |
| Marinitoga           | 1              | 15             | 0      | 0      | 0      | 0      | 0      | 1      | 1      | 0      | 0      | 0      | 1      | 0      | 0      | 0      | 0      | 0      | 0      | 0      |
| Marinobacter         | 2              | 163            | 0      | 0      | 1      | 1      | 0      | 0      | 0      | 0      | 1      | 0      | 1      | 0      | 1      | 0      | 1      | 0      | 0      | 1      |
| Marinomonas          | 3              | 192            | 0      | 0      | 1      | 1      | 0      | 1      | 1      | 0      | 0      | 0      | 0      | 1      | 1      | 0      | 0      | 0      | 0      | 1      |
| Maritimibacter       | 1              | 7              | 0      | 0      | 0      | 0      | 0      | 0      | 0      | 0      | 0      | 0      | 0      | 0      | 0      | 0      | 0      | 0      | 0      | 0      |
| Marivirga            | 2              | 96             | 0      | 0      | 1      | 0      | 0      | 0      | 1      | 0      | 1      | 0      | 0      | 1      | 0      | 0      | 0      | 0      | 0      | 0      |
| Martella             | 1              | 3              | 0      | 0      | 0      | 0      | 0      | 0      | 0      | 0      | 0      | 0      | 0      | 0      | 0      | 0      | 0      | 0      | 0      | 0      |
| Marvinbryantia       | 1              | 1              | 0      | 0      | 0      | 0      | 0      | 0      | 0      | 0      | 0      | 0      | 0      | 0      | 0      | 0      | 0      | 0      | 0      | 0      |
| Massilia             | 1              | 4              | 0      | 0      | 0      | 0      | 0      | 0      | 0      | 0      | 0      | 0      | 0      | 0      | 0      | 0      | 0      | 0      | 0      | 0      |
| Mastigocladopsis     | 1              | 16             | 0      | 0      | 0      | 1      | 0      | 0      | 0      | 0      | 0      | 0      | 0      | 0      | 0      | 0      | 0      | 0      | 0      | 0      |
| Megamonas            | 1              | 47             | 0      | 0      | 0      | 0      | 0      | 0      | 0      | 0      | 0      | 0      | 1      | 0      | 0      | 0      | 0      | 0      | 0      | 1      |
| Megasphaera          | 1              | 14             | 0      | 0      | 0      | 0      | 0      | 1      | 1      | 0      | 1      | 0      | 0      | 0      | 0      | 0      | 0      | 0      | 0      | 1      |
| Meiothermus          | 2              | 110            | 0      | 0      | 1      | 0      | 0      | 1      | 1      | 0      | 0      | 0      | 1      | 0      | 0      | 0      | 0      | 0      | 0      | 1      |
| Melissococcus        | 2              | 46             | 0      | 0      | 0      | 0      | 0      | 0      | 1      | 0      | 0      | 0      | 1      | 0      | 1      | 0      | 0      | 0      | 0      | 1      |
| Mesoflavibacter      | 1              | 6              | 0      | 0      | 0      | 0      | 0      | 0      | 0      | 0      | 0      | 0      | 0      | 0      | 0      | 0      | 0      | 0      | 0      | 0      |
| Mesoplasma           | 1              | 23             | 0      | 0      | 0      | 0      | 0      | 0      | 1      | 0      | 0      | 0      | 0      | 0      | 0      | 0      | 0      | 0      | 0      | 0      |
| Mesorhizobium        | 2              | 201            | 0      | 0      | 1      | 1      | 1      | 1      | 1      | 0      | 0      | 0      | 1      | 0      | 1      | 1      | 1      | 0      | 0      | 1      |
| Mesotoga             | 1              | 14             | 0      | 0      | 1      | 0      | 0      | 1      | 1      | 0      | 0      | 0      | 1      | 0      | 0      | 0      | 0      | 0      | 0      | 0      |
| Metallosphaera       | 1              | 18             | 0      | 0      | 0      | 1      | 0      | 0      | 1      | 0      | 0      | 0      | 1      | 0      | 1      | 1      | 0      | 0      | 1      | 0      |
| Methanobacterium     | 1              | 7              | 0      | 0      | 0      | 0      | 0      | 0      | 0      | 0      | 0      | 0      | 0      | 0      | 0      | 0      | 0      | 0      | 0      | 1      |
| Methanobrevibacter   | 1              | 9              | 0      | 0      | 0      | 0      | 0      | 0      | 0      | 0      | 0      | 0      | 0      | 0      | 0      | 0      | 0      | 0      | 0      | 1      |
| Methanocaldococcus   | 1              | 6              | 0      | 0      | 0      | 0      | 0      | 0      | 0      | 0      | 0      | 0      | 0      | 0      | 0      | 0      | 0      | 0      | 0      | 0      |
| Methanocella         | 1              | 15             | 0      | 0      | 1      | 0      | 0      | 0      | 0      | 0      | 0      | 0      | 1      | 0      | 0      | 0      | 0      | 0      | 0      | 1      |
| Methanococcaceae     | 1              | 1              | 0      | 0      | 0      | 0      | 0      | 0      | 0      | 0      | 0      | 0      | 0      | 0      | 0      | 0      | 0      | 0      | 0      | 0      |
| Methanococcoides     | 1              | 5              | 0      | 0      | 0      | 0      | 0      | 0      | 0      | 0      | 0      | 0      | 1      | 0      | 0      | 0      | 0      | 0      | 0      | 0      |
| Methanococcus        | 1              | 9              | 0      | 0      | 0      | 0      | 0      | 0      | 0      | 0      | 0      | 0      | 0      | 0      | 0      | 0      | 0      | 0      | 0      | 1      |
| Methanocorpusculum   | 1              | 7              | 0      | 0      | 0      | 0      | 0      | 0      | 0      | 0      | 0      | 0      | 1      | 0      | 0      | 0      | 0      | 0      | 0      | 0      |
| Methanoculleus       | 1              | 8              | 0      | 0      | 0      | 0      | 0      | 0      | 0      | 0      | 0      | 0      | 1      | 0      | 0      | 0      | 0      | 0      | 0      | 0      |
| Methanohalobium      | 1              | 5              | 0      | 0      | 0      | 0      | 0      | 0      | 0      | 0      | 0      | 0      | 1      | 0      | 0      | 0      | 0      | 0      | 0      | 0      |
| Methanohalophilus    | 1              | 5              | 0      | 0      | 0      | 0      | 0      | 0      | 0      | 0      | 0      | 0      | 1      | 0      | 0      | 0      | 0      | 0      | 0      | 0      |
| Methanolobus         | 1              | 5              | 0      | 0      | 0      | 0      | 0      | 0      | 0      | 0      | 0      | 0      | 1      | 0      | 0      | 0      | 0      | 0      | 0      | 0      |
| Methanomethylovorans | 1              | 5              | 0      | 0      | 0      | 0      | 0      | 0      | 0      | 0      | 0      | 0      | 1      | 0      | 0      | 0      | 0      | 0      | 0      | 0      |
| Methanoplanus        | 1              | 7              | 0      | 0      | 0      | 0      | 0      | 0      | 0      | 0      | 0      | 0      | 1      | 0      | 0      | 0      | 0      | 0      | 0      | 1      |
| Methanopyrus         | 1              | 4              | 0      | 0      | 0      | 0      | 0      | 0      | 0      | 0      | 0      | 0      | 0      | 0      | 0      | 0      | 0      | 0      | 0      | 0      |
| Methanoregula        | 1              | 8              | 0      | 0      | 0      | 0      | 0      | 0      | 0      | 0      | 0      | 0      | 1      | 0      | 0      | 0      | 0      | 0      | 0      | 1      |
| Methanosaeta         | 1              | 9              | 0      | 0      | 0      | 0      | 0      | 0      | 0      | 0      | 0      | 0      | 1      | 0      | 0      | 0      | 0      | 0      | 0      | 1      |
| Methanosalsum        | 1              | 7              | 0      | 0      | 0      | 0      | 0      | 0      | 0      | 0      | 0      | 0      | 1      | 0      | 0      | 0      | 0      | 0      | 0      | 0      |

| Genus               | Cluster Number | Protein Counts | K01195 | K01253 | K01426 | K01428 | K01457 | K01464 | K01489 | K01500 | K01501 | K01502 | K01512 | K01555 | K01560 | K01561 | K01563 | K01564 | K01576 | K01607 |
|---------------------|----------------|----------------|--------|--------|--------|--------|--------|--------|--------|--------|--------|--------|--------|--------|--------|--------|--------|--------|--------|--------|
| Methanosarcina      | 1              | 18             | 0      | 0      | 0      | 0      | 0      | 1      | 0      | 0      | 1      | 0      | 1      | 0      | 0      | 0      | 0      | 0      | 0      | 1      |
| Methanosphaera      | 1              | 7              | 0      | 0      | 0      | 0      | 0      | 0      | 0      | 0      | 0      | 0      | 0      | 0      | 0      | 0      | 0      | 0      | 0      | 0      |
| Methanosphaerula    | 1              | 8              | 0      | 0      | 0      | 0      | 0      | 0      | 0      | 0      | 0      | 0      | 1      | 0      | 0      | 0      | 0      | 0      | 0      | 1      |
| Methanospirillum    | 1              | 6              | 0      | 0      | 0      | 0      | 0      | 0      | 0      | 0      | 0      | 0      | 1      | 0      | 0      | 0      | 0      | 0      | 0      | 0      |
| Methanothermobacter | 1              | 6              | 0      | 0      | 0      | 0      | 0      | 0      | 0      | 0      | 0      | 0      | 0      | 0      | 0      | 0      | 0      | 0      | 0      | 1      |
| Methanothermococcus | 1              | 5              | 0      | 0      | 0      | 0      | 0      | 0      | 0      | 0      | 0      | 0      | 0      | 0      | 0      | 0      | 0      | 0      | 0      | 0      |
| Methanothermus      | 1              | 5              | 0      | 0      | 0      | 0      | 0      | 0      | 0      | 0      | 0      | 0      | 1      | 0      | 0      | 0      | 0      | 0      | 0      | 0      |
| Methanotorris       | 1              | 5              | 0      | 0      | 0      | 0      | 0      | 0      | 0      | 0      | 0      | 0      | 0      | 0      | 0      | 0      | 0      | 0      | 0      | 0      |
| Methylacidiphilum   | 2              | 48             | 0      | 0      | 0      | 0      | 0      | 1      | 0      | 0      | 0      | 0      | 1      | 0      | 0      | 0      | 0      | 0      | 0      | 0      |
| Methylarcula        | 1              | 2              | 0      | 0      | 0      | 0      | 0      | 0      | 0      | 0      | 0      | 0      | 0      | 0      | 0      | 0      | 0      | 0      | 0      | 0      |
| Methylibium         | 1              | 38             | 0      | 0      | 1      | 1      | 1      | 0      | 1      | 0      | 1      | 1      | 0      | 0      | 1      | 1      | 0      | 0      | 0      | 0      |
| Methylobacillus     | 2              | 61             | 0      | 0      | 1      | 1      | 0      | 0      | 0      | 0      | 1      | 0      | 0      | 0      | 0      | 0      | 0      | 0      | 0      | 0      |
| Methylobacterium    | 3              | 236            | 0      | 0      | 1      | 1      | 1      | 1      | 1      | 0      | 1      | 1      | 1      | 1      | 1      | 1      | 0      | 0      | 1      | 1      |
| Methylocella        | 3              | 117            | 0      | 0      | 0      | 1      | 1      | 0      | 1      | 0      | 1      | 0      | 1      | 0      | 1      | 1      | 0      | 0      | 1      | 0      |
| Methylococcus       | 2              | 80             | 0      | 0      | 0      | 0      | 0      | 0      | 0      | 0      | 1      | 0      | 1      | 0      | 0      | 0      | 0      | 0      | 0      | 0      |
| Methylocystis       | 1              | 21             | 0      | 0      | 1      | 0      | 0      | 0      | 0      | 0      | 0      | 0      | 1      | 0      | 1      | 1      | 0      | 0      | 0      | 1      |
| Methyloferula       | 1              | 2              | 0      | 0      | 0      | 0      | 0      | 0      | 0      | 0      | 0      | 0      | 0      | 0      | 0      | 0      | 0      | 0      | 0      | 0      |
| Methylomicrobium    | 1              | 12             | 0      | 0      | 0      | 1      | 0      | 0      | 0      | 0      | 1      | 0      | 1      | 0      | 0      | 0      | 0      | 0      | 0      | 0      |
| Methylomonas        | 1              | 15             | 0      | 0      | 0      | 1      | 0      | 0      | 1      | 0      | 1      | 1      | 1      | 0      | 0      | 0      | 0      | 0      | 0      | 0      |
| Methylophaga        | 1              | 7              | 0      | 0      | 0      | 1      | 0      | 0      | 0      | 0      | 0      | 0      | 1      | 0      | 0      | 0      | 0      | 0      | 0      | 0      |
| Methylophilus       | 1              | 2              | 0      | 0      | 0      | 0      | 0      | 0      | 0      | 0      | 0      | 0      | 0      | 0      | 0      | 0      | 0      | 0      | 0      | 0      |
| Methylosinus        | 1              | 2              | 0      | 0      | 0      | 0      | 0      | 0      | 0      | 0      | 0      | 0      | 0      | 0      | 0      | 0      | 0      | 0      | 0      | 0      |
| Methylotenera       | 2              | 72             | 0      | 0      | 0      | 1      | 1      | 0      | 0      | 0      | 1      | 0      | 0      | 0      | 0      | 0      | 0      | 0      | 0      | 0      |
| Methyloversatilis   | 1              | 5              | 0      | 0      | 0      | 0      | 0      | 0      | 0      | 0      | 0      | 0      | 0      | 0      | 0      | 0      | 0      | 0      | 0      | 0      |
| Methylovorus        | 2              | 66             | 0      | 0      | 0      | 1      | 1      | 0      | 0      | 0      | 1      | 0      | 0      | 0      | 0      | 0      | 0      | 0      | 0      | 0      |
| Micavibrio          | 1              | 9              | 0      | 0      | 0      | 0      | 0      | 0      | 0      | 0      | 0      | 0      | 0      | 0      | 0      | 0      | 0      | 0      | 0      | 0      |
| Microbacterium      | 2              | 115            | 0      | 0      | 1      | 0      | 0      | 1      | 1      | 0      | 0      | 0      | 1      | 0      | 0      | 0      | 0      | 0      | 0      | 0      |
| Microchaete         | 1              | 23             | 0      | 0      | 0      | 1      | 0      | 0      | 0      | 0      | 0      | 0      | 0      | 0      | 0      | 0      | 0      | 0      | 0      | 0      |
| Micrococcus         | 2              | 72             | 0      | 0      | 1      | 1      | 0      | 0      | 1      | 0      | 0      | 0      | 0      | 0      | 0      | 0      | 0      | 0      | 0      | 0      |
| Microcoleus         | 1              | 17             | 0      | 0      | 1      | 1      | 0      | 0      | 0      | 0      | 0      | 0      | 1      | 0      | 1      | 0      | 0      | 0      | 0      | 0      |
| Microcystis         | 2              | 67             | 0      | 0      | 1      | 1      | 0      | 0      | 1      | 0      | 0      | 0      | 0      | 0      | 0      | 1      | 0      | 0      | 0      | 0      |
| Microlunatus        | 1              | 25             | 0      | 0      | 0      | 1      | 0      | 1      | 0      | 0      | 0      | 0      | 1      | 1      | 1      | 0      | 0      | 0      | 0      | 1      |
| Micromonospora      | 2              | 115            | 0      | 0      | 1      | 1      | 0      | 0      | 1      | 0      | 0      | 0      | 0      | 1      | 0      | 1      | 0      | 0      | 1      | 0      |
| Microvirga          | 1              | 6              | 0      | 0      | 0      | 0      | 0      | 0      | 0      | 0      | 0      | 0      | 0      | 0      | 0      | 0      | 0      | 0      | 0      | 0      |
| Mobiluncus          | 1              | 41             | 0      | 0      | 0      | 0      | 0      | 0      | 0      | 0      | 0      | 0      | 0      | 0      | 0      | 0      | 0      | 0      | 0      | 0      |
| Modestobacter       | 1              | 43             | 1      | 0      | 1      | 1      | 0      | 1      | 1      | 0      | 0      | 0      | 1      | 1      | 1      | 1      | 1      | 0      | 0      | 1      |
| Moorea              | 1              | 2              | 0      | 0      | 0      | 0      | 0      | 0      | 0      | 0      | 0      | 0      | 0      | 0      | 0      | 0      | 0      | 0      | 0      | 0      |
| Moorella            | 2              | 69             | 0      | 0      | 0      | 0      | 0      | 1      | 1      | 0      | 0      | 0      | 1      | 0      | 0      | 0      | 0      | 0      | 0      | 0      |
| Moraxella           | 2              | 66             | 0      | 0      | 0      | 0      | 0      | 0      | 0      | 0      | 0      | 0      | 0      | 0      | 0      | 0      | 0      | 0      | 0      | 1      |
| Morganella          | 1              | 29             | 0      | 0      | 0      | 1      | 0      | 1      | 1      | 0      | 0      | 0      | 1      | 0      | 0      | 0      | 0      | 0      | 1      | 0      |
| Moritella           | 1              | 2              | 0      | 0      | 0      | 0      | 0      | 0      | 0      | 0      | 0      | 0      | 0      | 0      | 0      | 0      | 0      | 0      | 0      | 0      |
| Muricauda           | 1              | 23             | 0      | 0      | 1      | 0      | 0      | 0      | 1      | 0      | 0      | 0      | 0      | 1      | 0      | 0      | 0      | 0      | 0      | 0      |
| Mycobacterium       | 3              | 306            | 0      | 1      | 1      | 1      | 1      | 1      | 1      | 0      | 1      | 1      | 1      | 1      | 1      | 1      | 1      | 0      | 1      | 1      |
| Mycoplasma          | 1              | 53             | 0      | 0      | 0      | 0      | 0      | 0      | 1      | 0      | 0      | 0      | 0      | 0      | 0      | 0      | 0      | 0      | 0      | 1      |
| Myxococcus          | 2              | 110            | 0      | 0      | 1      | 1      | 0      | 0      | 1      | 0      | 0      | 0      | 1      | 0      | 0      | 0      | 1      | 0      | 0      | 0      |
| Nakamurella         | 2              | 115            | 0      | 0      | 1      | 1      | 1      | 0      | 1      | 0      | 0      | 0      | 1      | 1      | 0      | 1      | 0      | 0      | 0      | 0      |
| napthalene          | 1              | 2              | 0      | 0      | 0      | 0      | 0      | 0      | 0      | 0      | 0      | 0      | 0      | 0      | 0      | 0      | 0      | 0      | 0      | 0      |
| Natranaerobius      | 2              | 55             | 0      | 0      | 1      | 0      | 0      | 0      | 1      | 0      | 1      | 0      | 1      | 0      | 0      | 0      | 0      | 0      | 0      | 0      |
| Natrialba           | 1              | 16             | 0      | 0      | 1      | 0      | 0      | 1      | 1      | 0      | 0      | 0      | 1      | 0      | 0      | 0      | 0      | 0      | 1      | 0      |
| Natrinema           | 1              | 16             | 0      | 0      | 0      | 0      | 0      | 0      | 1      | 0      | 0      | 0      | 1      | 0      | 1      | 0      | 1      | 0      | 1      | 0      |
| Natronobacterium    | 1              | 11             | 0      | 0      | 1      | 0      | 0      | 0      | 1      | 0      | 0      | 0      | 1      | 0      | 0      | 0      | 0      | 0      | 0      | 0      |
| Natronococcus       | 1              | 21             | 0      | 0      | 1      | 1      | 0      | 1      | 1      | 0      | 0      | 0      | 1      | 0      | 1      | 0      | 0      | 0      | 1      | 0      |

| Genus             | Cluster Number | Protein Counts | K01195 | K01253 | K01426 | K01428 | K01457 | K01464 | K01489 | K01500 | K01501 | K01502 | K01512 | K01555 | K01560 | K01561 | K01563 | K01564 | K01576 | K01607 |
|-------------------|----------------|----------------|--------|--------|--------|--------|--------|--------|--------|--------|--------|--------|--------|--------|--------|--------|--------|--------|--------|--------|
| Natronomonas      | 1              | 20             | 0      | 0      | 1      | 1      | 0      | 1      | 1      | 0      | 0      | 0      | 1      | 0      | 1      | 0      | 0      | 0      | 1      | 0      |
| Nautilia          | 2              | 48             | 0      | 0      | 0      | 0      | 0      | 0      | 0      | 0      | 0      | 0      | 1      | 0      | 0      | 0      | 0      | 0      | 0      | 0      |
| Neisseria         | 2              | 67             | 0      | 0      | 0      | 0      | 0      | 0      | 0      | 0      | 1      | 0      | 0      | 0      | 0      | 0      | 0      | 0      | 0      | 0      |
| Neisseriaceae     | 1              | 1              | 0      | 0      | 0      | 0      | 0      | 0      | 0      | 0      | 0      | 0      | 0      | 0      | 0      | 0      | 0      | 0      | 0      | 0      |
| Neorickettsia     | 1              | 31             | 0      | 0      | 0      | 0      | 0      | 0      | 0      | 0      | 0      | 0      | 0      | 0      | 0      | 0      | 0      | 0      | 0      | 0      |
| Neptuniibacter    | 1              | 2              | 0      | 0      | 0      | 0      | 0      | 0      | 0      | 0      | 0      | 0      | 0      | 0      | 0      | 0      | 0      | 0      | 0      | 0      |
| Niastella         | 1              | 21             | 1      | 0      | 0      | 1      | 0      | 1      | 1      | 0      | 0      | 0      | 1      | 0      | 0      | 0      | 0      | 0      | 0      | 0      |
| Nitratifractor    | 2              | 54             | 0      | 0      | 0      | 0      | 0      | 0      | 0      | 0      | 0      | 0      | 1      | 0      | 0      | 0      | 0      | 0      | 0      | 0      |
| Nitratireductor   | 1              | 19             | 0      | 0      | 0      | 0      | 0      | 0      | 0      | 0      | 0      | 0      | 0      | 0      | 0      | 0      | 0      | 0      | 0      | 0      |
| Nitratiruptor     | 2              | 40             | 0      | 0      | 0      | 0      | 0      | 0      | 0      | 0      | 0      | 0      | 0      | 0      | 0      | 0      | 0      | 0      | 0      | 0      |
| Nitrobacter       | 2              | 99             | 0      | 0      | 0      | 0      | 0      | 0      | 0      | 0      | 0      | 0      | 1      | 1      | 0      | 0      | 0      | 0      | 0      | 0      |
| Nitrococcus       | 1              | 2              | 0      | 0      | 0      | 0      | 0      | 0      | 0      | 0      | 0      | 0      | 0      | 0      | 0      | 0      | 0      | 0      | 0      | 0      |
| Nitrosococcus     | 2              | 94             | 0      | 0      | 0      | 1      | 0      | 0      | 0      | 0      | 1      | 0      | 1      | 0      | 0      | 0      | 0      | 0      | 0      | 0      |
| Nitrosomonas      | 2              | 72             | 0      | 0      | 0      | 1      | 0      | 0      | 0      | 0      | 1      | 0      | 0      | 0      | 0      | 0      | 0      | 0      | 0      | 0      |
| Nitrosopumilaceae | 1              | 7              | 0      | 0      | 0      | 0      | 0      | 1      | 0      | 0      | 0      | 0      | 1      | 0      | 0      | 0      | 0      | 0      | 0      | 0      |
| Nitrosopumilus    | 1              | 11             | 0      | 0      | 0      | 1      | 0      | 1      | 1      | 0      | 0      | 0      | 1      | 0      | 0      | 0      | 0      | 0      | 0      | 0      |
| Nitrospira        | 2              | 74             | 0      | 0      | 0      | 1      | 1      | 0      | 0      | 0      | 1      | 0      | 0      | 0      | 0      | 0      | 0      | 0      | 0      | 0      |
| Nocardia          | 2              | 185            | 0      | 0      | 1      | 1      | 1      | 1      | 1      | 0      | 0      | 1      | 1      | 1      | 1      | 0      | 1      | 0      | 1      | 1      |
| Nocardioidaceae   | 1              | 2              | 0      | 0      | 0      | 0      | 0      | 0      | 0      | 0      | 0      | 0      | 0      | 0      | 0      | 0      | 0      | 0      | 0      | 0      |
| Nocardioides      | 2              | 157            | 0      | 0      | 1      | 0      | 0      | 1      | 1      | 0      | 0      | 0      | 1      | 1      | 1      | 0      | 0      | 0      | 0      | 0      |
| Nocardiopsis      | 2              | 102            | 0      | 0      | 1      | 1      | 0      | 1      | 1      | 0      | 0      | 0      | 1      | 1      | 1      | 1      | 0      | 0      | 0      | 1      |
| Nodularia         | 1              | 22             | 0      | 0      | 0      | 1      | 0      | 0      | 0      | 0      | 0      | 0      | 0      | 0      | 0      | 0      | 0      | 0      | 0      | 0      |
| Nonlabens         | 1              | 19             | 0      | 0      | 1      | 0      | 0      | 0      | 1      | 0      | 0      | 0      | 0      | 1      | 1      | 0      | 0      | 0      | 0      | 0      |
| Nostoc            | 2              | 111            | 0      | 0      | 1      | 1      | 0      | 0      | 0      | 0      | 0      | 0      | 1      | 0      | 1      | 1      | 0      | 0      | 1      | 1      |
| Nostocaceae       | 1              | 2              | 0      | 0      | 0      | 0      | 0      | 0      | 0      | 0      | 0      | 0      | 0      | 0      | 0      | 0      | 0      | 0      | 0      | 0      |
| Novosphingobium   | 2              | 169            | 0      | 0      | 1      | 1      | 1      | 0      | 1      | 0      | 0      | 1      | 0      | 1      | 1      | 0      | 0      | 0      | 1      | 0      |
| Oceanibaculum     | 1              | 3              | 0      | 0      | 0      | 0      | 0      | 0      | 0      | 0      | 0      | 0      | 0      | 0      | 0      | 0      | 0      | 0      | 0      | 0      |
| Oceanibulbus      | 1              | 12             | 0      | 0      | 0      | 0      | 0      | 0      | 0      | 0      | 0      | 0      | 0      | 0      | 0      | 0      | 0      | 0      | 0      | 0      |
| Oceanicola        | 1              | 9              | 0      | 0      | 0      | 0      | 0      | 0      | 0      | 0      | 0      | 0      | 0      | 0      | 0      | 0      | 0      | 0      | 0      | 0      |
| Oceanimonas       | 1              | 33             | 0      | 0      | 0      | 1      | 0      | 1      | 0      | 0      | 0      | 0      | 1      | 0      | 0      | 0      | 0      | 0      | 0      | 0      |
| Oceaniovalibus    | 1              | 2              | 0      | 0      | 0      | 0      | 0      | 0      | 0      | 0      | 0      | 0      | 0      | 0      | 0      | 0      | 0      | 0      | 0      | 0      |
| Oceanithermus     | 2              | 72             | 0      | 0      | 0      | 0      | 0      | 0      | 1      | 0      | 0      | 0      | 1      | 0      | 0      | 0      | 0      | 0      | 0      | 1      |
| Oceanobacillus    | 2              | 91             | 0      | 0      | 1      | 0      | 0      | 0      | 1      | 0      | 0      | 0      | 1      | 0      | 0      | 0      | 0      | 0      | 0      | 0      |
| Oceanospirillum   | 1              | 2              | 0      | 0      | 0      | 0      | 0      | 0      | 0      | 0      | 0      | 0      | 0      | 0      | 0      | 0      | 0      | 0      | 0      | 0      |
| Ochrobactrum      | 2              | 133            | 0      | 0      | 1      | 1      | 0      | 1      | 0      | 0      | 1      | 0      | 0      | 0      | 1      | 1      | 0      | 0      | 0      | 1      |
| Octadecabacter    | 1              | 29             | 0      | 0      | 1      | 1      | 0      | 1      | 1      | 0      | 1      | 0      | 0      | 0      | 1      | 1      | 0      | 0      | 0      | 1      |
| Oenococcus        | 2              | 41             | 0      | 0      | 1      | 0      | 0      | 0      | 1      | 0      | 0      | 0      | 0      | 0      | 0      | 0      | 0      | 0      | 0      | 0      |
| Oleomonas         | 1              | 2              | 0      | 0      | 0      | 0      | 0      | 0      | 0      | 0      | 0      | 0      | 0      | 0      | 0      | 0      | 0      | 0      | 0      | 0      |
| Oligotropha       | 3              | 87             | 0      | 0      | 0      | 0      | 0      | 0      | 0      | 0      | 0      | 1      | 1      | 0      | 1      | 0      | 0      | 0      | 0      | 1      |
| Olsenella         | 2              | 40             | 0      | 0      | 0      | 0      | 0      | 0      | 1      | 0      | 0      | 0      | 1      | 0      | 0      | 0      | 0      | 0      | 0      | 0      |
| Opitutus          | 2              | 67             | 1      | 0      | 0      | 1      | 0      | 0      | 1      | 0      | 0      | 0      | 1      | 0      | 0      | 0      | 1      | 0      | 0      | 0      |
| Orientia          | 1              | 21             | 0      | 0      | 0      | 0      | 0      | 0      | 0      | 0      | 0      | 0      | 0      | 0      | 0      | 0      | 0      | 0      | 0      | 0      |
| Ornithobacterium  | 1              | 11             | 0      | 0      | 0      | 1      | 0      | 0      | 1      | 0      | 0      | 0      | 0      | 0      | 1      | 0      | 0      | 0      | 0      | 0      |
| Oscillatoria      | 1              | 16             | 0      | 0      | 1      | 1      | 0      | 0      | 0      | 0      | 0      | 0      | 1      | 0      | 0      | 0      | 0      | 0      | 0      | 1      |
| Oscillatoriales   | 1              | 2              | 0      | 0      | 0      | 0      | 0      | 0      | 0      | 0      | 0      | 0      | 0      | 0      | 0      | 0      | 0      | 0      | 0      | 0      |
| Oscillibacter     | 1              | 20             | 0      | 0      | 0      | 0      | 0      | 1      | 1      | 0      | 0      | 0      | 0      | 0      | 0      | 0      | 0      | 0      | 0      | 0      |
| Owenweeksia       | 1              | 15             | 0      | 0      | 0      | 0      | 0      | 0      | 0      | 0      | 0      | 0      | 1      | 1      | 1      | 0      | 1      | 0      | 0      | 0      |
| Oxalobacteraceae  | 1              | 4              | 0      | 0      | 0      | 0      | 0      | 0      | 0      | 0      | 0      | 0      | 0      | 0      | 0      | 0      | 0      | 0      | 0      | 0      |
| Paenibacillus     | 2              | 152            | 1      | 0      | 1      | 1      | 1      | 1      | 1      | 0      | 0      | 0      | 1      | 0      | 1      | 0      | 1      | 0      | 0      | 1      |
| Paludibacter      | 2              | 67             | 1      | 0      | 0      | 0      | 0      | 0      | 1      | 0      | 0      | 0      | 0      | 0      | 0      | 0      | 0      | 0      | 0      | 0      |
| Pandoraea         | 1              | 18             | 0      | 0      | 1      | 0      | 0      | 0      | 0      | 0      | 0      | 0      | 0      | 0      | 0      | 0      | 0      | 0      | 0      | 0      |
| Pannonibacter     | 1              | 3              | 0      | 0      | 0      | 0      | 0      | 0      | 0      | 0      | 0      | 0      | 0      | 0      | 0      | 0      | 0      | 0      | 0      | 0      |

| Genus              | Cluster Number | Protein Counts | K01195 | K01253 | K01426 | K01428 | K01457 | K01464 | K01489 | K01500 | K01501 | K01502 | K01512 | K01555 | K01560 | K01561 | K01563 | K01564 | K01576 | K01607 |
|--------------------|----------------|----------------|--------|--------|--------|--------|--------|--------|--------|--------|--------|--------|--------|--------|--------|--------|--------|--------|--------|--------|
| Pantholops         | 1              | 23             | 0      | 0      | 0      | 0      | 0      | 0      | 0      | 0      | 0      | 0      | 0      | 0      | 0      | 0      | 0      | 0      | 0      | 0      |
| Pantoea            | 2              | 181            | 1      | 0      | 1      | 0      | 1      | 1      | 1      | 0      | 1      | 1      | 1      | 0      | 1      | 1      | 0      | 0      | 0      | 1      |
| Parabacteroides    | 2              | 64             | 0      | 0      | 0      | 0      | 0      | 0      | 1      | 0      | 0      | 0      | 0      | 0      | 0      | 0      | 0      | 0      | 0      | 1      |
| Parachlamydia      | 1              | 11             | 0      | 0      | 0      | 0      | 0      | 0      | 1      | 0      | 0      | 0      | 1      | 0      | 0      | 0      | 0      | 0      | 0      | 1      |
| Paracoccus         | 2              | 169            | 0      | 0      | 1      | 1      | 0      | 1      | 1      | 0      | 0      | 0      | 0      | 1      | 0      | 0      | 0      | 0      | 0      | 1      |
| Parvibaculum       | 3              | 117            | 0      | 0      | 1      | 0      | 1      | 0      | 0      | 0      | 0      | 0      | 0      | 0      | 0      | 0      | 1      | 0      | 0      | 0      |
| Parvularcula       | 2              | 72             | 0      | 0      | 0      | 0      | 0      | 0      | 0      | 0      | 0      | 0      | 0      | 0      | 0      | 0      | 1      | 0      | 0      | 0      |
| Pasteurella        | 2              | 85             | 0      | 0      | 0      | 1      | 0      | 0      | 1      | 0      | 0      | 0      | 1      | 0      | 0      | 0      | 0      | 0      | 0      | 0      |
| Pasteurellaceae    | 1              | 2              | 0      | 0      | 0      | 0      | 0      | 0      | 0      | 0      | 0      | 0      | 0      | 0      | 0      | 0      | 0      | 0      | 0      | 0      |
| Pectobacterium     | 1              | 44             | 0      | 0      | 0      | 0      | 1      | 0      | 1      | 0      | 0      | 0      | 1      | 0      | 1      | 0      | 0      | 0      | 0      | 1      |
| Pediococcus        | 1              | 43             | 0      | 0      | 0      | 0      | 0      | 0      | 0      | 0      | 0      | 0      | 1      | 0      | 1      | 0      | 0      | 0      | 0      | 1      |
| Pedobacter         | 2              | 88             | 1      | 0      | 0      | 0      | 0      | 0      | 0      | 0      | 0      | 0      | 1      | 0      | 0      | 0      | 0      | 0      | 0      | 0      |
| Pelagibaca         | 1              | 10             | 0      | 0      | 0      | 0      | 0      | 0      | 0      | 0      | 0      | 0      | 0      | 0      | 0      | 0      | 0      | 0      | 0      | 0      |
| Pelagibacterium    | 1              | 39             | 0      | 0      | 0      | 1      | 1      | 1      | 1      | 0      | 1      | 0      | 0      | 0      | 1      | 0      | 0      | 0      | 1      | 1      |
| Pelobacter         | 2              | 85             | 0      | 0      | 0      | 0      | 0      | 0      | 1      | 0      | 0      | 0      | 1      | 0      | 0      | 0      | 1      | 0      | 0      | 0      |
| Pelodictyon        | 2              | 62             | 0      | 0      | 0      | 0      | 0      | 0      | 0      | 0      | 0      | 0      | 1      | 0      | 0      | 0      | 0      | 0      | 0      | 0      |
| Pelosinus          | 1              | 1              | 0      | 0      | 0      | 0      | 0      | 0      | 0      | 0      | 0      | 0      | 0      | 0      | 0      | 0      | 0      | 0      | 0      | 0      |
| Pelotomaculum      | 2              | 60             | 0      | 0      | 0      | 0      | 0      | 0      | 1      | 0      | 0      | 0      | 1      | 0      | 0      | 0      | 0      | 0      | 0      | 0      |
| Peptostreptococcus | 1              | 1              | 0      | 0      | 0      | 0      | 0      | 0      | 1      | 0      | 0      | 0      | 0      | 0      | 0      | 0      | 0      | 0      | 0      | 0      |
| Persephonella      | 2              | 55             | 0      | 0      | 0      | 0      | 0      | 0      | 0      | 0      | 0      | 0      | 1      | 0      | 0      | 0      | 0      | 0      | 0      | 0      |
| Petrotoga          | 2              | 72             | 0      | 0      | 1      | 0      | 0      | 1      | 1      | 0      | 0      | 0      | 1      | 0      | 0      | 0      | 0      | 0      | 0      | 0      |
| Phaeobacter        | 2              | 55             | 0      | 0      | 1      | 1      | 0      | 1      | 1      | 0      | 0      | 0      | 0      | 1      | 1      | 0      | 0      | 0      | 0      | 1      |
| Phenylobacterium   | 3              | 103            | 0      | 0      | 1      | 0      | 0      | 0      | 0      | 0      | 0      | 0      | 1      | 0      | 0      | 0      | 1      | 0      | 0      | 0      |
| Photobacterium     | 2              | 119            | 0      | 0      | 0      | 0      | 0      | 1      | 1      | 0      | 0      | 0      | 1      | 0      | 0      | 0      | 1      | 0      | 0      | 1      |
| Photorhabdus       | 2              | 149            | 0      | 0      | 0      | 1      | 0      | 0      | 1      | 0      | 0      | 1      | 1      | 0      | 0      | 0      | 0      | 0      | 0      | 1      |
| Phycisphaera       | 1              | 9              | 0      | 0      | 0      | 1      | 0      | 1      | 0      | 0      | 0      | 0      | 1      | 0      | 0      | 0      | 0      | 0      | 0      | 0      |
| Phyllobacterium    | 1              | 6              | 0      | 0      | 0      | 0      | 0      | 0      | 0      | 0      | 0      | 0      | 0      | 0      | 0      | 0      | 0      | 0      | 0      | 0      |
| Picrophilus        | 1              | 15             | 0      | 0      | 0      | 0      | 0      | 0      | 0      | 0      | 0      | 0      | 1      | 0      | 0      | 0      | 0      | 0      | 0      | 0      |
| Pirellula          | 2              | 85             | 0      | 0      | 0      | 0      | 0      | 0      | 1      | 0      | 1      | 0      | 1      | 0      | 0      | 0      | 1      | 0      | 1      | 0      |
| Planctomyces       | 2              | 93             | 0      | 0      | 0      | 0      | 0      | 0      | 0      | 0      | 0      | 0      | 1      | 0      | 1      | 0      | 1      | 0      | 0      | 0      |
| Plautia            | 1              | 17             | 0      | 0      | 0      | 0      | 0      | 0      | 0      | 0      | 0      | 0      | 0      | 0      | 0      | 0      | 0      | 0      | 0      | 0      |
| Plesiomonas        | 1              | 4              | 0      | 0      | 0      | 0      | 0      | 0      | 0      | 0      | 0      | 0      | 0      | 0      | 0      | 0      | 0      | 0      | 0      | 0      |
| Pleurocapsa        | 1              | 23             | 0      | 0      | 1      | 1      | 0      | 0      | 1      | 0      | 0      | 0      | 1      | 1      | 0      | 1      | 0      | 0      | 0      | 0      |
| Polaribacter       | 2              | 74             | 0      | 0      | 1      | 0      | 0      | 0      | 1      | 0      | 0      | 0      | 0      | 1      | 0      | 0      | 0      | 0      | 0      | 0      |
| Polaromonas        | 3              | 238            | 0      | 0      | 1      | 1      | 1      | 1      | 0      | 0      | 1      | 1      | 1      | 1      | 1      | 1      | 0      | 0      | 1      | 1      |
| Polymorphum        | 3              | 173            | 1      | 0      | 0      | 1      | 1      | 1      | 1      | 0      | 0      | 0      | 1      | 0      | 1      | 1      | 0      | 0      | 1      | 1      |
| Polynucleobacter   | 1              | 19             | 0      | 0      | 1      | 1      | 0      | 0      | 0      | 0      | 1      | 0      | 0      | 0      | 1      | 1      | 0      | 0      | 1      | 1      |
| Ponticaulis        | 1              | 1              | 0      | 0      | 0      | 0      | 0      | 0      | 0      | 0      | 0      | 0      | 0      | 0      | 0      | 0      | 0      | 0      | 0      | 0      |
| Porphyromonas      | 2              | 63             | 0      | 0      | 0      | 0      | 0      | 0      | 1      | 0      | 0      | 0      | 0      | 0      | 0      | 0      | 0      | 0      | 0      | 0      |
| Prevotella         | 1              | 65             | 1      | 0      | 0      | 0      | 0      | 0      | 1      | 0      | 0      | 0      | 0      | 0      | 0      | 0      | 0      | 0      | 0      | 1      |
| Prochlorococcus    | 2              | 68             | 0      | 0      | 0      | 1      | 0      | 0      | 0      | 0      | 1      | 0      | 0      | 0      | 0      | 0      | 0      | 0      | 0      | 0      |
| Propionibacterium  | 1              | 62             | 1      | 0      | 1      | 0      | 0      | 0      | 1      | 0      | 0      | 0      | 1      | 0      | 0      | 0      | 0      | 0      | 0      | 1      |
| Prosthecochloris   | 1              | 16             | 0      | 0      | 0      | 0      | 0      | 0      | 0      | 0      | 0      | 0      | 1      | 0      | 1      | 0      | 0      | 0      | 0      | 0      |
| Proteobacteria     | 1              | 19             | 0      | 0      | 0      | 0      | 0      | 0      | 0      | 0      | 0      | 0      | 0      | 0      | 0      | 0      | 0      | 0      | 0      | 0      |
| Proteus            | 2              | 113            | 0      | 0      | 0      | 1      | 0      | 0      | 1      | 0      | 0      | 0      | 1      | 0      | 0      | 0      | 0      | 0      | 0      | 0      |
| Providencia        | 1              | 38             | 0      | 0      | 1      | 1      | 0      | 0      | 1      | 0      | 0      | 0      | 1      | 0      | 0      | 0      | 0      | 0      | 1      | 0      |
| Pseudaminobacter   | 1              | 10             | 0      | 0      | 0      | 1      | 0      | 0      | 0      | 0      | 0      | 0      | 0      | 0      | 0      | 0      | 0      | 0      | 0      | 0      |
| Pseudanabaena      | 1              | 11             | 0      | 0      | 0      | 1      | 0      | 0      | 0      | 0      | 0      | 0      | 1      | 0      | 0      | 0      | 0      | 0      | 0      | 1      |
| Pseudoalteromonas  | 2              | 188            | 0      | 0      | 1      | 1      | 1      | 0      | 1      | 0      | 1      | 0      | 0      | 1      | 1      | 0      | 1      | 0      | 0      | 0      |
| Pseudochrobactrum  | 1              | 7              | 0      | 0      | 0      | 0      | 0      | 0      | 0      | 0      | 0      | 0      | 0      | 0      | 0      | 0      | 0      | 0      | 0      | 0      |
| Pseudogulbenkiania | 1              | 40             | 0      | 0      | 0      | 1      | 0      | 0      | 0      | 0      | 1      | 0      | 1      | 0      | 0      | 0      | 0      | 0      | 0      | 1      |
| pseudomallei       | 3              | 131            | 0      | 0      | 1      | 1      | 0      | 0      | 1      | 0      | 0      | 0      | 1      | 0      | 1      | 0      | 0      | 0      | 0      | 1      |

| Genus                   | Cluster Number | Protein Counts | K01195 | K01253 | K01426 | K01428 | K01457 | K01464 | K01489 | K01500 | K01501 | K01502 | K01512 | K01555 | K01560 | K01561 | K01563 | K01564 | K01576 | K01607 |
|-------------------------|----------------|----------------|--------|--------|--------|--------|--------|--------|--------|--------|--------|--------|--------|--------|--------|--------|--------|--------|--------|--------|
| Pseudomonas             | 3              | 381            | 0      | 0      | 1      | 1      | 1      | 1      | 0      | 1      | 1      | 1      | 1      | 1      | 1      | 1      | 1      | 1      | 1      | 1      |
| Pseudonocardia          | 3              | 180            | 0      | 0      | 1      | 1      | 1      | 1      | 0      | 0      | 1      | 1      | 1      | 1      | 1      | 0      | 1      | 0      | 0      | 1      |
| Pseudorhodobacter       | 1              | 4              | 0      | 0      | 0      | 0      | 0      | 0      | 0      | 0      | 0      | 0      | 0      | 0      | 0      | 0      | 0      | 0      | 0      | 0      |
| Pseudovibrio            | 1              | 33             | 1      | 0      | 1      | 1      | 0      | 1      | 1      | 0      | 0      | 0      | 1      | 1      | 1      | 0      | 0      | 0      | 0      | 1      |
| Pseudoxanthomonas       | 2              | 124            | 0      | 0      | 1      | 0      | 0      | 0      | 0      | 0      | 0      | 0      | 1      | 0      | 0      | 0      | 1      | 0      | 0      | 0      |
| Psychrobacter           | 2              | 124            | 0      | 0      | 1      | 1      | 0      | 0      | 0      | 1      | 1      | 0      | 0      | 1      | 1      | 0      | 1      | 0      | 1      | 1      |
| Psychroflexus           | 1              | 22             | 0      | 0      | 1      | 0      | 0      | 0      | 1      | 0      | 0      | 0      | 0      | 1      | 1      | 0      | 0      | 0      | 0      | 0      |
| Psychromonas            | 2              | 110            | 0      | 0      | 0      | 1      | 1      | 0      | 1      | 0      | 0      | 0      | 1      | 0      | 1      | 1      | 1      | 0      | 0      | 0      |
| Pusillimonas            | 3              | 111            | 0      | 0      | 1      | 0      | 0      | 1      | 0      | 0      | 1      | 0      | 1      | 1      | 1      | 1      | 0      | 0      | 0      | 1      |
| Pyrobaculum             | 1              | 15             | 0      | 0      | 0      | 0      | 0      | 0      | 1      | 0      | 0      | 0      | 1      | 0      | 1      | 0      | 0      | 0      | 0      | 0      |
| Pyrococcus              | 1              | 10             | 0      | 0      | 1      | 0      | 0      | 0      | 0      | 0      | 0      | 0      | 1      | 0      | 1      | 0      | 0      | 0      | 0      | 0      |
| Pyrolobus               | 1              | 4              | 0      | 0      | 0      | 0      | 0      | 0      | 0      | 0      | 0      | 0      | 0      | 0      | 0      | 0      | 0      | 0      | 0      | 0      |
| Rahnella                | 2              | 143            | 0      | 0      | 0      | 0      | 1      | 0      | 1      | 0      | 0      | 0      | 1      | 0      | 0      | 1      | 0      | 0      | 0      | 1      |
| Ralstonia               | 3              | 332            | 0      | 1      | 1      | 1      | 1      | 1      | 0      | 1      | 1      | 1      | 1      | 1      | 1      | 1      | 1      | 0      | 1      | 1      |
| Ramlibacter             | 1              | 35             | 0      | 0      | 0      | 1      | 0      | 0      | 0      | 0      | 1      | 0      | 0      | 0      | 1      | 1      | 0      | 0      | 0      | 1      |
| Raoultella              | 2              | 139            | 0      | 0      | 1      | 1      | 0      | 1      | 1      | 0      | 0      | 0      | 1      | 0      | 0      | 0      | 0      | 0      | 0      | 1      |
| Raphidiopsis            | 1              | 5              | 0      | 0      | 0      | 0      | 0      | 0      | 0      | 0      | 0      | 0      | 0      | 0      | 0      | 0      | 0      | 0      | 0      | 0      |
| Reinekea                | 1              | 2              | 0      | 0      | 0      | 0      | 0      | 0      | 0      | 0      | 0      | 0      | 0      | 0      | 0      | 0      | 0      | 0      | 0      | 0      |
| Renibacterium           | 2              | 67             | 0      | 0      | 0      | 0      | 0      | 0      | 0      | 0      | 0      | 0      | 0      | 0      | 0      | 0      | 0      | 0      | 0      | 1      |
| Rhizobiaceae            | 1              | 3              | 0      | 0      | 0      | 0      | 0      | 0      | 0      | 0      | 0      | 0      | 0      | 0      | 0      | 0      | 0      | 0      | 0      | 0      |
| Rhizobiales             | 1              | 6              | 0      | 0      | 0      | 0      | 0      | 0      | 0      | 0      | 0      | 0      | 0      | 0      | 0      | 0      | 0      | 0      | 0      | 0      |
| Rhizobium               | 3              | 257            | 1      | 0      | 1      | 1      | 1      | 1      | 1      | 0      | 1      | 1      | 1      | 0      | 1      | 1      | 1      | 1      | 0      | 1      |
| Rhizobium/Agrobacterium | 2              | 87             | 0      | 0      | 0      | 1      | 0      | 0      | 0      | 0      | 0      | 0      | 0      | 0      | 1      | 0      | 0      | 0      | 0      | 0      |
| Rhodanobacter           | 1              | 21             | 0      | 0      | 1      | 0      | 0      | 0      | 1      | 0      | 0      | 0      | 1      | 0      | 1      | 0      | 0      | 0      | 0      | 0      |
| Rhodobacter             | 3              | 175            | 0      | 0      | 1      | 1      | 1      | 1      | 1      | 0      | 1      | 0      | 0      | 0      | 1      | 1      | 0      | 0      | 0      | 1      |
| Rhodobacteraceae        | 1              | 21             | 0      | 0      | 0      | 0      | 0      | 1      | 0      | 0      | 0      | 0      | 0      | 0      | 0      | 0      | 0      | 0      | 0      | 0      |
| Rhodobacterales         | 1              | 34             | 0      | 0      | 0      | 0      | 0      | 1      | 0      | 0      | 0      | 0      | 0      | 1      | 0      | 0      | 0      | 0      | 0      | 0      |
| Rhodococcus             | 2              | 292            | 0      | 0      | 1      | 1      | 1      | 0      | 1      | 1      | 1      | 0      | 1      | 1      | 1      | 1      | 0      | 1      | 1      | 1      |
| Rhodocyclaceae          | 1              | 7              | 0      | 0      | 0      | 0      | 0      | 0      | 0      | 0      | 0      | 0      | 0      | 0      | 0      | 0      | 0      | 0      | 0      | 0      |
| Rhodoferax              | 3              | 144            | 0      | 0      | 0      | 1      | 1      | 0      | 0      | 0      | 1      | 0      | 1      | 0      | 1      | 0      | 0      | 0      | 0      | 1      |
| Rhodomicrobium          | 2              | 103            | 0      | 0      | 0      | 0      | 0      | 0      | 0      | 0      | 0      | 0      | 0      | 0      | 0      | 0      | 0      | 0      | 0      | 1      |
| Rhodopirellula          | 2              | 87             | 0      | 0      | 0      | 0      | 0      | 0      | 1      | 1      | 0      | 0      | 1      | 0      | 1      | 0      | 1      | 1      | 0      | 0      |
| Rhodopseudomonas        | 3              | 246            | 0      | 0      | 1      | 1      | 1      | 0      | 1      | 1      | 1      | 1      | 1      | 1      | 1      | 1      | 0      | 0      | 1      | 1      |
| Rhodospirillum          | 2              | 121            | 0      | 0      | 1      | 1      | 1      | 0      | 1      | 0      | 0      | 0      | 1      | 0      | 0      | 0      | 0      | 0      | 0      | 0      |
| Rhodothermus            | 2              | 76             | 1      | 0      | 0      | 0      | 0      | 0      | 0      | 0      | 0      | 0      | 1      | 0      | 0      | 0      | 0      | 0      | 0      | 0      |
| Rhodovulum              | 1              | 4              | 0      | 0      | 0      | 0      | 0      | 0      | 0      | 0      | 0      | 0      | 0      | 0      | 0      | 0      | 0      | 0      | 0      | 0      |
| Richelia                | 1              | 2              | 0      | 0      | 0      | 0      | 0      | 0      | 0      | 0      | 0      | 0      | 0      | 0      | 0      | 0      | 0      | 0      | 0      | 0      |
| Rickettsia              | 2              | 43             | 0      | 0      | 0      | 0      | 0      | 0      | 0      | 0      | 0      | 0      | 0      | 0      | 0      | 0      | 0      | 0      | 0      | 0      |
| Rickettsiaceae          | 1              | 5              | 0      | 0      | 0      | 0      | 0      | 0      | 0      | 0      | 0      | 0      | 0      | 0      | 0      | 0      | 0      | 0      | 0      | 0      |
| Riemerella              | 2              | 61             | 0      | 0      | 0      | 1      | 0      | 0      | 1      | 0      | 0      | 0      | 0      | 1      | 0      | 0      | 0      | 0      | 0      | 0      |
| Rivularia               | 1              | 18             | 0      | 0      | 1      | 1      | 0      | 0      | 0      | 0      | 0      | 0      | 1      | 0      | 0      | 0      | 0      | 0      | 0      | 1      |
| Robiginitalea           | 2              | 83             | 0      | 0      | 1      | 0      | 0      | 0      | 1      | 0      | 0      | 0      | 0      | 1      | 0      | 0      | 0      | 0      | 0      | 0      |
| Roseburia               | 2              | 58             | 1      | 0      | 0      | 0      | 0      | 0      | 1      | 0      | 0      | 0      | 1      | 0      | 0      | 0      | 0      | 0      | 0      | 1      |
| Roseibium               | 1              | 3              | 0      | 0      | 0      | 0      | 0      | 0      | 0      | 0      | 0      | 0      | 0      | 0      | 0      | 0      | 0      | 0      | 0      | 0      |
| Roseiflexus             | 3              | 100            | 0      | 0      | 1      | 0      | 0      | 0      | 1      | 0      | 0      | 0      | 1      | 0      | 1      | 1      | 0      | 1      | 0      | 0      |
| Roseobacter             | 2              | 149            | 0      | 0      | 1      | 1      | 1      | 1      | 1      | 0      | 0      | 0      | 0      | 1      | 1      | 1      | 0      | 0      | 0      | 1      |
| Roseomonas              | 1              | 2              | 0      | 0      | 0      | 0      | 0      | 0      | 0      | 0      | 0      | 0      | 0      | 0      | 0      | 0      | 0      | 0      | 0      | 0      |
| Roseovarius             | 1              | 15             | 0      | 0      | 1      | 0      | 0      | 0      | 0      | 0      | 0      | 0      | 0      | 0      | 0      | 0      | 0      | 0      | 0      | 0      |
| Rothia                  | 1              | 44             | 0      | 0      | 0      | 0      | 0      | 0      | 0      | 0      | 0      | 0      | 1      | 0      | 0      | 0      | 0      | 0      | 0      | 1      |
| Rubrivivax              | 1              | 24             | 0      | 0      | 1      | 1      | 0      | 0      | 1      | 0      | 0      | 0      | 0      | 1      | 1      | 0      | 0      | 0      | 0      | 1      |
| Rubrobacter             | 3              | 117            | 0      | 0      | 1      | 0      | 0      | 1      | 1      | 0      | 1      | 0      | 1      | 0      | 1      | 0      | 0      | 0      | 0      | 1      |
| Ruegeria                | 2              | 189            | 1      | 0      | 1      | 1      | 0      | 1      | 1      | 0      | 0      | 1      | 0      | 1      | 1      | 0      | 0      | 0      | 0      | 1      |



| Genus             | Cluster Number | Protein Counts | K01195 | K01253 | K01426 | K01428 | K01457 | K01464 | K01489 | K01500 | K01501 | K01502 | K01512 | K01555 | K01560 | K01561 | K01563 | K01564 | K01576 | K01607 |
|-------------------|----------------|----------------|--------|--------|--------|--------|--------|--------|--------|--------|--------|--------|--------|--------|--------|--------|--------|--------|--------|--------|
| Ruminococcaceae   | 1              | 2              | 0      | 0      | 0      | 0      | 0      | 0      | 0      | 0      | 0      | 0      | 0      | 0      | 0      | 0      | 0      | 0      | 0      | 0      |
| Ruminococcus      | 2              | 101            | 0      | 0      | 0      | 1      | 0      | 1      | 1      | 0      | 0      | 0      | 1      | 0      | 1      | 0      | 0      | 0      | 0      | 1      |
| Runella           | 1              | 26             | 1      | 0      | 0      | 0      | 0      | 0      | 0      | 0      | 1      | 0      | 0      | 1      | 0      | 0      | 0      | 0      | 0      | 0      |
| Saccharomonospora | 2              | 132            | 0      | 0      | 1      | 0      | 0      | 0      | 1      | 0      | 0      | 0      | 1      | 1      | 0      | 0      | 1      | 0      | 0      | 1      |
| Saccharophagus    | 2              | 81             | 1      | 0      | 0      | 1      | 1      | 0      | 0      | 0      | 0      | 0      | 1      | 0      | 0      | 0      | 0      | 0      | 0      | 0      |
| Saccharopolyspora | 3              | 194            | 0      | 1      | 1      | 1      | 0      | 1      | 1      | 1      | 0      | 0      | 1      | 1      | 1      | 1      | 0      | 1      | 1      | 1      |
| Saccharothrix     | 1              | 32             | 0      | 0      | 1      | 0      | 0      | 1      | 1      | 0      | 0      | 1      | 1      | 1      | 0      | 1      | 0      | 0      | 1      | 1      |
| Sagittula         | 1              | 10             | 0      | 0      | 0      | 0      | 0      | 0      | 0      | 0      | 0      | 0      | 0      | 0      | 0      | 0      | 0      | 0      | 0      | 0      |
| Salinibacter      | 2              | 77             | 0      | 0      | 1      | 0      | 0      | 0      | 0      | 0      | 0      | 0      | 1      | 1      | 1      | 0      | 1      | 0      | 0      | 0      |
| Salinimonas       | 1              | 1              | 0      | 0      | 0      | 0      | 0      | 0      | 0      | 0      | 0      | 0      | 0      | 0      | 0      | 0      | 0      | 0      | 0      | 0      |
| Salinispora       | 3              | 127            | 0      | 1      | 1      | 0      | 0      | 0      | 1      | 0      | 0      | 0      | 0      | 1      | 0      | 0      | 1      | 0      | 0      | 0      |
| Salinivibrio      | 1              | 2              | 0      | 0      | 0      | 0      | 0      | 0      | 0      | 0      | 0      | 0      | 0      | 0      | 0      | 0      | 0      | 0      | 0      | 0      |
| Salmonella        | 2              | 151            | 1      | 0      | 0      | 0      | 0      | 0      | 1      | 0      | 0      | 0      | 1      | 0      | 0      | 1      | 0      | 0      | 0      | 0      |
| Sanguibacter      | 2              | 73             | 0      | 0      | 1      | 0      | 1      | 1      | 1      | 0      | 0      | 0      | 0      | 0      | 0      | 0      | 0      | 0      | 0      | 0      |
| Saprospira        | 1              | 13             | 0      | 0      | 0      | 0      | 0      | 0      | 1      | 0      | 0      | 0      | 0      | 1      | 1      | 0      | 0      | 0      | 0      | 0      |
| Scardovia         | 1              | 1              | 0      | 0      | 0      | 0      | 0      | 0      | 0      | 0      | 0      | 0      | 0      | 0      | 0      | 0      | 0      | 0      | 0      | 0      |
| Scytonema         | 1              | 10             | 0      | 0      | 0      | 1      | 0      | 0      | 0      | 0      | 0      | 0      | 0      | 0      | 0      | 0      | 0      | 0      | 0      | 0      |
| Sebaldella        | 2              | 69             | 0      | 0      | 0      | 0      | 0      | 1      | 1      | 0      | 0      | 0      | 0      | 0      | 0      | 0      | 0      | 0      | 0      | 1      |
| Segniliparus      | 2              | 85             | 0      | 0      | 0      | 1      | 1      | 1      | 1      | 0      | 0      | 0      | 0      | 0      | 0      | 0      | 0      | 0      | 0      | 1      |
| Selenomonas       | 2              | 57             | 0      | 0      | 0      | 0      | 0      | 0      | 1      | 0      | 0      | 0      | 1      | 0      | 0      | 0      | 0      | 0      | 0      | 0      |
| Serinicoccus      | 1              | 1              | 0      | 0      | 0      | 0      | 0      | 0      | 0      | 0      | 0      | 0      | 0      | 0      | 0      | 0      | 0      | 0      | 0      | 0      |
| Serratia          | 2              | 186            | 1      | 0      | 1      | 0      | 1      | 0      | 1      | 0      | 0      | 0      | 1      | 0      | 0      | 0      | 0      | 0      | 1      | 1      |
| Shewanella        | 3              | 214            | 0      | 0      | 1      | 1      | 0      | 1      | 1      | 0      | 1      | 1      | 1      | 0      | 1      | 0      | 1      | 0      | 0      | 1      |
| Shigella          | 2              | 172            | 1      | 0      | 0      | 1      | 0      | 1      | 1      | 0      | 0      | 0      | 1      | 0      | 0      | 0      | 0      | 1      | 0      | 1      |
| Shinella          | 1              | 2              | 0      | 0      | 0      | 0      | 0      | 0      | 0      | 0      | 0      | 0      | 0      | 0      | 0      | 0      | 0      | 0      | 0      | 0      |
| Sideroxydans      | 2              | 81             | 0      | 0      | 0      | 0      | 1      | 0      | 0      | 0      | 1      | 0      | 1      | 0      | 1      | 0      | 0      | 0      | 0      | 0      |
| Silicibacter      | 2              | 105            | 1      | 0      | 1      | 1      | 0      | 1      | 1      | 0      | 0      | 0      | 0      | 1      | 1      | 0      | 0      | 0      | 0      | 1      |
| Simiduia          | 1              | 18             | 0      | 0      | 1      | 0      | 0      | 0      | 0      | 0      | 0      | 0      | 0      | 1      | 0      | 0      | 0      | 0      | 0      | 1      |
| Simkania          | 1              | 6              | 0      | 0      | 0      | 0      | 0      | 0      | 0      | 0      | 0      | 0      | 1      | 0      | 0      | 0      | 0      | 0      | 0      | 0      |
| Simonsiella       | 1              | 2              | 0      | 0      | 0      | 0      | 0      | 0      | 0      | 0      | 0      | 0      | 0      | 0      | 0      | 0      | 0      | 0      | 0      | 0      |
| Singulisphaera    | 1              | 18             | 0      | 0      | 0      | 1      | 0      | 0      | 1      | 0      | 0      | 0      | 1      | 0      | 0      | 0      | 1      | 0      | 0      | 0      |
| Sinorhizobium     | 3              | 207            | 0      | 0      | 1      | 1      | 1      | 1      | 1      | 0      | 1      | 0      | 1      | 0      | 1      | 0      | 0      | 0      | 0      | 1      |
| Slackia           | 2              | 46             | 0      | 0      | 1      | 0      | 0      | 0      | 0      | 0      | 0      | 0      | 0      | 0      | 0      | 0      | 0      | 0      | 0      | 0      |
| Smaragdicoccus    | 1              | 3              | 0      | 0      | 0      | 0      | 0      | 0      | 0      | 0      | 0      | 0      | 0      | 0      | 0      | 0      | 0      | 0      | 0      | 0      |
| Sodalis           | 2              | 71             | 0      | 0      | 0      | 0      | 0      | 0      | 1      | 0      | 0      | 0      | 1      | 0      | 0      | 0      | 0      | 0      | 0      | 0      |
| Solibacillus      | 1              | 23             | 0      | 0      | 0      | 0      | 0      | 1      | 1      | 0      | 0      | 0      | 0      | 0      | 1      | 0      | 0      | 0      | 0      | 0      |
| Solitaea          | 1              | 13             | 0      | 0      | 1      | 0      | 0      | 0      | 0      | 0      | 0      | 0      | 1      | 0      | 0      | 0      | 0      | 0      | 0      | 0      |
| Sorangium         | 3              | 115            | 0      | 0      | 1      | 1      | 0      | 1      | 1      | 0      | 0      | 1      | 1      | 0      | 1      | 0      | 1      | 0      | 0      | 0      |
| Sphaerobacter     | 2              | 100            | 0      | 0      | 1      | 0      | 0      | 1      | 0      | 0      | 0      | 0      | 1      | 0      | 1      | 0      | 0      | 0      | 0      | 1      |
| Sphaerochaeta     | 1              | 42             | 0      | 0      | 0      | 0      | 0      | 1      | 0      | 0      | 0      | 0      | 0      | 0      | 0      | 0      | 0      | 0      | 0      | 0      |
| Sphingobacterium  | 3              | 85             | 0      | 0      | 0      | 0      | 0      | 0      | 0      | 0      | 0      | 0      | 1      | 0      | 1      | 0      | 0      | 0      | 0      | 1      |
| Sphingobium       | 1              | 179            | 0      | 0      | 0      | 1      | 1      | 0      | 1      | 0      | 0      | 0      | 1      | 1      | 1      | 0      | 1      | 0      | 1      | 1      |
| Sphingomonadaceae | 1              | 15             | 0      | 0      | 0      | 0      | 0      | 0      | 0      | 0      | 0      | 0      | 0      | 0      | 0      | 0      | 0      | 0      | 0      | 0      |
| Sphingomonas      | 2              | 220            | 0      | 1      | 1      | 1      | 0      | 0      | 1      | 0      | 1      | 0      | 1      | 1      | 1      | 0      | 1      | 0      | 1      | 1      |
| Sphingopyxis      | 3              | 99             | 0      | 0      | 0      | 0      | 0      | 0      | 0      | 0      | 0      | 0      | 0      | 0      | 0      | 0      | 0      | 0      | 0      | 0      |
| Spirochaeta       | 2              | 103            | 0      | 0      | 0      | 0      | 0      | 1      | 1      | 0      | 0      | 0      | 1      | 0      | 1      | 0      | 0      | 0      | 0      | 1      |
| Spiroplasma       | 1              | 6              | 0      | 0      | 0      | 0      | 0      | 0      | 1      | 0      | 0      | 0      | 0      | 0      | 0      | 0      | 0      | 0      | 0      | 0      |
| Spirosoma         | 2              | 107            | 1      | 0      | 0      | 0      | 0      | 0      | 0      | 0      | 1      | 0      | 0      | 1      | 0      | 0      | 0      | 0      | 0      | 0      |
| Stackebrandtia    | 2              | 110            | 0      | 0      | 1      | 0      | 0      | 0      | 1      | 0      | 0      | 0      | 1      | 1      | 1      | 0      | 0      | 0      | 0      | 1      |
| Stanieria         | 1              | 17             | 0      | 0      | 0      | 1      | 0      | 0      | 1      | 0      | 0      | 0      | 1      | 1      | 0      | 1      | 0      | 0      | 0      | 0      |
| Staphylococcus    | 2              | 108            | 1      | 0      | 0      | 1      | 0      | 0      | 1      | 0      | 0      | 0      | 1      | 0      | 1      | 0      | 0      | 0      | 0      | 1      |
| Staphylothermus   | 1              | 12             | 0      | 0      | 0      | 0      | 0      | 1      | 1      | 0      | 0      | 0      | 0      | 0      | 0      | 0      | 0      | 1      | 0      | 0      |

| Genus                  | Cluster Number | Protein Counts | K01195 | K01253 | K01426 | K01428 | K01457 | K01464 | K01489 | K01500 | K01501 | K01502 | K01512 | K01555 | K01560 | K01561 | K01563 | K01564 | K01576 | K01607 |
|------------------------|----------------|----------------|--------|--------|--------|--------|--------|--------|--------|--------|--------|--------|--------|--------|--------|--------|--------|--------|--------|--------|
| Stappia                | 1              | 2              | 0      | 0      | 0      | 0      | 0      | 0      | 0      | 0      | 0      | 0      | 0      | 0      | 0      | 0      | 0      | 0      | 0      | 0      |
| Starkeya               | 3              | 134            | 0      | 0      | 1      | 1      | 1      | 1      | 0      | 0      | 0      | 1      | 1      | 0      | 0      | 1      | 0      | 0      | 0      | 1      |
| Stenotrophomonas       | 3              | 104            | 0      | 0      | 1      | 0      | 0      | 0      | 0      | 0      | 0      | 0      | 0      | 0      | 0      | 0      | 1      | 0      | 0      | 1      |
| Stigmatella            | 3              | 129            | 0      | 0      | 1      | 1      | 0      | 1      | 1      | 0      | 0      | 0      | 1      | 0      | 0      | 0      | 0      | 0      | 0      | 0      |
| Streptobacillus        | 1              | 38             | 1      | 0      | 0      | 0      | 0      | 0      | 1      | 0      | 0      | 0      | 0      | 0      | 0      | 0      | 0      | 0      | 0      | 0      |
| Streptococcus          | 2              | 121            | 1      | 0      | 1      | 1      | 0      | 0      | 1      | 0      | 0      | 0      | 1      | 0      | 0      | 0      | 0      | 0      | 0      | 1      |
| Streptomyces           | 2              | 253            | 1      | 1      | 1      | 1      | 1      | 1      | 1      | 0      | 0      | 0      | 1      | 1      | 1      | 1      | 1      | 0      | 1      | 1      |
| Streptosporangium      | 3              | 148            | 0      | 0      | 1      | 1      | 0      | 1      | 1      | 0      | 0      | 0      | 1      | 1      | 0      | 1      | 1      | 0      | 0      | 0      |
| Strigomonas            | 1              | 2              | 0      | 0      | 0      | 0      | 0      | 0      | 0      | 0      | 0      | 0      | 0      | 0      | 0      | 0      | 0      | 0      | 0      | 0      |
| Sulfitobacter          | 1              | 10             | 0      | 0      | 0      | 0      | 0      | 0      | 0      | 0      | 0      | 0      | 0      | 0      | 0      | 0      | 0      | 0      | 0      | 0      |
| Sulfobacillus          | 1              | 30             | 0      | 0      | 1      | 1      | 0      | 1      | 1      | 0      | 0      | 0      | 1      | 0      | 1      | 0      | 0      | 0      | 0      | 0      |
| Sulfolobus             | 1              | 23             | 1      | 0      | 1      | 1      | 0      | 0      | 0      | 0      | 0      | 0      | 1      | 0      | 1      | 1      | 0      | 0      | 1      | 1      |
| Sulfuricurvum          | 2              | 67             | 0      | 0      | 0      | 0      | 1      | 0      | 0      | 0      | 0      | 0      | 0      | 0      | 0      | 0      | 0      | 0      | 0      | 0      |
| Sulfurihydrogenibium   | 2              | 55             | 0      | 0      | 0      | 0      | 0      | 0      | 0      | 0      | 0      | 0      | 1      | 0      | 0      | 0      | 0      | 0      | 0      | 0      |
| Sulfurimonas           | 2              | 60             | 0      | 0      | 0      | 0      | 0      | 0      | 0      | 0      | 0      | 0      | 0      | 0      | 0      | 0      | 0      | 0      | 0      | 0      |
| Sulfurospirillum       | 1              | 48             | 0      | 0      | 0      | 0      | 0      | 0      | 0      | 0      | 0      | 0      | 1      | 0      | 0      | 0      | 0      | 0      | 0      | 0      |
| Sulfurovum             | 2              | 48             | 0      | 0      | 0      | 0      | 0      | 0      | 0      | 0      | 0      | 0      | 1      | 0      | 0      | 0      | 0      | 0      | 0      | 0      |
| Symbiobacterium        | 2              | 68             | 0      | 0      | 0      | 0      | 0      | 0      | 1      | 0      | 0      | 0      | 0      | 0      | 0      | 0      | 0      | 0      | 0      | 0      |
| Synechococcus          | 1              | 34             | 0      | 0      | 1      | 1      | 0      | 0      | 1      | 1      | 1      | 1      | 1      | 0      | 0      | 0      | 1      | 0      | 0      | 1      |
| Synechocystis          | 1              | 40             | 0      | 0      | 1      | 1      | 0      | 0      | 1      | 0      | 0      | 1      | 0      | 0      | 0      | 0      | 0      | 0      | 0      | 1      |
| Synergistetes          | 1              | 27             | 0      | 0      | 0      | 0      | 0      | 0      | 0      | 0      | 0      | 0      | 0      | 0      | 0      | 0      | 0      | 0      | 0      | 0      |
| Syntrophobacter        | 2              | 101            | 0      | 0      | 0      | 0      | 0      | 0      | 0      | 0      | 1      | 0      | 1      | 0      | 0      | 0      | 0      | 0      | 1      | 1      |
| Syntrophobotulus       | 2              | 71             | 0      | 0      | 0      | 1      | 1      | 1      | 1      | 0      | 0      | 0      | 0      | 0      | 0      | 0      | 0      | 0      | 0      | 0      |
| Syntrophomonas         | 2              | 58             | 0      | 0      | 0      | 0      | 0      | 0      | 1      | 0      | 0      | 0      | 0      | 0      | 0      | 0      | 0      | 0      | 0      | 0      |
| Syntrophothermus       | 2              | 60             | 0      | 0      | 0      | 0      | 0      | 0      | 1      | 0      | 0      | 0      | 0      | 0      | 0      | 0      | 0      | 0      | 0      | 0      |
| Syntrophus             | 2              | 66             | 0      | 0      | 0      | 0      | 0      | 0      | 1      | 0      | 0      | 0      | 1      | 0      | 0      | 0      | 0      | 0      | 0      | 1      |
| Tannerella             | 1              | 8              | 0      | 0      | 0      | 0      | 0      | 0      | 1      | 0      | 0      | 0      | 0      | 0      | 0      | 0      | 0      | 0      | 0      | 0      |
| Taylorella             | 1              | 43             | 0      | 0      | 0      | 0      | 0      | 0      | 0      | 0      | 0      | 0      | 0      | 0      | 0      | 0      | 0      | 0      | 0      | 0      |
| Tepidanaerobacter      | 2              | 55             | 0      | 0      | 1      | 0      | 0      | 0      | 1      | 0      | 0      | 0      | 1      | 0      | 0      | 0      | 0      | 0      | 0      | 0      |
| Teredinibacter         | 2              | 109            | 0      | 0      | 0      | 1      | 1      | 0      | 0      | 0      | 0      | 1      | 0      | 0      | 0      | 0      | 0      | 0      | 0      | 0      |
| Terrabacter            | 1              | 1              | 0      | 0      | 0      | 0      | 0      | 0      | 0      | 0      | 0      | 0      | 0      | 0      | 0      | 0      | 0      | 0      | 0      | 0      |
| Terriglobus            | 2              | 83             | 1      | 0      | 0      | 0      | 0      | 1      | 1      | 0      | 0      | 0      | 1      | 0      | 0      | 0      | 0      | 0      | 0      | 1      |
| Tetragenococcus        | 1              | 12             | 0      | 0      | 1      | 0      | 0      | 1      | 1      | 0      | 0      | 0      | 1      | 0      | 0      | 0      | 0      | 0      | 0      | 1      |
| Thalassiobium          | 1              | 11             | 0      | 0      | 0      | 0      | 0      | 1      | 0      | 0      | 0      | 0      | 0      | 0      | 0      | 0      | 0      | 0      | 0      | 0      |
| Thalassobacter         | 1              | 9              | 0      | 0      | 0      | 0      | 0      | 0      | 0      | 0      | 0      | 0      | 0      | 1      | 0      | 0      | 0      | 0      | 0      | 0      |
| Thalassolituus         | 1              | 12             | 0      | 0      | 1      | 1      | 0      | 0      | 0      | 0      | 0      | 0      | 0      | 0      | 0      | 0      | 0      | 0      | 0      | 0      |
| Thalassospira          | 1              | 2              | 0      | 0      | 0      | 0      | 0      | 0      | 0      | 0      | 0      | 0      | 0      | 0      | 0      | 0      | 0      | 0      | 0      | 0      |
| Thauera                | 1              | 111            | 0      | 0      | 0      | 1      | 0      | 0      | 0      | 0      | 1      | 0      | 1      | 0      | 0      | 0      | 0      | 0      | 0      | 0      |
| Thermacetogenium       | 1              | 7              | 0      | 0      | 0      | 0      | 0      | 1      | 1      | 0      | 0      | 0      | 0      | 0      | 0      | 0      | 0      | 0      | 0      | 0      |
| Thermaerobacter        | 2              | 79             | 0      | 0      | 0      | 0      | 0      | 0      | 0      | 0      | 0      | 0      | 1      | 0      | 0      | 0      | 0      | 0      | 0      | 0      |
| Thermanaerovibrio      | 2              | 58             | 0      | 0      | 0      | 0      | 0      | 1      | 1      | 0      | 0      | 0      | 1      | 0      | 0      | 0      | 0      | 0      | 0      | 0      |
| Thermincola            | 2              | 62             | 0      | 0      | 1      | 1      | 0      | 0      | 1      | 0      | 0      | 0      | 0      | 0      | 0      | 0      | 0      | 0      | 0      | 0      |
| Thermoanaerobacter     | 2              | 76             | 0      | 0      | 1      | 0      | 0      | 0      | 1      | 0      | 0      | 0      | 1      | 0      | 0      | 0      | 0      | 0      | 0      | 0      |
| Thermoanaerobacterium  | 2              | 64             | 0      | 0      | 1      | 0      | 0      | 0      | 1      | 0      | 0      | 0      | 1      | 0      | 0      | 0      | 0      | 0      | 0      | 0      |
| Thermobacillus         | 1              | 11             | 1      | 0      | 0      | 0      | 0      | 0      | 1      | 0      | 0      | 0      | 0      | 0      | 0      | 0      | 0      | 0      | 0      | 0      |
| Thermobaculum          | 2              | 62             | 1      | 0      | 0      | 0      | 0      | 0      | 0      | 0      | 0      | 0      | 1      | 0      | 0      | 0      | 0      | 0      | 0      | 0      |
| Thermobifida           | 2              | 72             | 0      | 0      | 1      | 0      | 0      | 0      | 0      | 0      | 0      | 0      | 1      | 0      | 0      | 0      | 0      | 0      | 0      | 0      |
| Thermobispora          | 2              | 109            | 0      | 0      | 1      | 1      | 0      | 0      | 1      | 0      | 0      | 0      | 1      | 1      | 0      | 0      | 0      | 0      | 1      | 0      |
| Thermococcus           | 1              | 13             | 0      | 0      | 1      | 0      | 0      | 0      | 0      | 0      | 0      | 0      | 1      | 0      | 1      | 0      | 0      | 1      | 0      | 0      |
| Thermocrinis           | 2              | 60             | 0      | 0      | 0      | 1      | 0      | 0      | 0      | 0      | 0      | 0      | 1      | 0      | 0      | 0      | 0      | 0      | 0      | 0      |
| Thermodesulfator       | 1              | 10             | 0      | 0      | 0      | 1      | 0      | 0      | 0      | 0      | 0      | 0      | 1      | 0      | 1      | 0      | 0      | 0      | 0      | 0      |
| Thermodesulfobacterium | 1              | 9              | 0      | 0      | 0      | 0      | 0      | 0      | 0      | 0      | 0      | 0      | 1      | 0      | 0      | 0      | 0      | 0      | 0      | 0      |

| Genus                       | Cluster Number | Protein Counts | K01195 | K01253 | K01426 | K01428 | K01457 | K01464 | K01489 | K01500 | K01501 | K01502 | K01512 | K01555 | K01560 | K01561 | K01563 | K01564 | K01576 | K01607 |
|-----------------------------|----------------|----------------|--------|--------|--------|--------|--------|--------|--------|--------|--------|--------|--------|--------|--------|--------|--------|--------|--------|--------|
| <b>Thermodesulfobium</b>    | 1              | 13             | 0      | 0      | 0      | 0      | 0      | 0      | 1      | 0      | 0      | 0      | 1      | 0      | 0      | 0      | 0      | 0      | 0      | 0      |
| <b>Thermodesulfovibrio</b>  | 2              | 60             | 0      | 0      | 0      | 0      | 0      | 0      | 0      | 0      | 0      | 0      | 1      | 0      | 0      | 0      | 0      | 0      | 0      | 0      |
| <b>Thermofilum</b>          | 1              | 9              | 0      | 0      | 0      | 0      | 0      | 0      | 0      | 0      | 0      | 0      | 1      | 0      | 0      | 0      | 0      | 1      | 0      | 0      |
| <b>Thermogladus</b>         | 1              | 7              | 0      | 0      | 0      | 0      | 0      | 1      | 1      | 0      | 0      | 0      | 0      | 0      | 0      | 0      | 0      | 0      | 0      | 0      |
| <b>Thermomicrobium</b>      | 2              | 92             | 0      | 0      | 1      | 1      | 0      | 0      | 1      | 0      | 0      | 0      | 1      | 0      | 1      | 0      | 0      | 0      | 0      | 0      |
| <b>Thermomonospora</b>      | 2              | 125            | 0      | 0      | 1      | 1      | 0      | 0      | 1      | 0      | 0      | 0      | 1      | 1      | 0      | 0      | 0      | 0      | 0      | 0      |
| <b>Thermoplasma</b>         | 1              | 11             | 0      | 0      | 0      | 0      | 0      | 0      | 0      | 0      | 0      | 0      | 1      | 0      | 0      | 0      | 0      | 0      | 1      | 0      |
| <b>Thermoplasmatales</b>    | 1              | 6              | 0      | 0      | 0      | 0      | 0      | 0      | 0      | 0      | 0      | 0      | 0      | 0      | 0      | 0      | 0      | 0      | 0      | 0      |
| <b>Thermoproteus</b>        | 1              | 12             | 0      | 0      | 0      | 0      | 0      | 0      | 1      | 0      | 0      | 0      | 1      | 0      | 1      | 0      | 0      | 0      | 0      | 0      |
| <b>Thermosediminibacter</b> | 2              | 64             | 0      | 0      | 0      | 0      | 0      | 0      | 1      | 0      | 0      | 0      | 1      | 0      | 0      | 0      | 0      | 0      | 0      | 0      |
| <b>Thermosipho</b>          | 2              | 70             | 0      | 0      | 1      | 0      | 0      | 1      | 1      | 0      | 0      | 0      | 0      | 0      | 0      | 0      | 0      | 0      | 0      | 0      |
| <b>Thermosphaera</b>        | 1              | 10             | 0      | 0      | 0      | 0      | 0      | 1      | 1      | 0      | 0      | 0      | 0      | 0      | 0      | 0      | 0      | 0      | 0      | 0      |
| <b>Thermosynechococcus</b>  | 1              | 6              | 0      | 0      | 0      | 1      | 0      | 0      | 0      | 0      | 0      | 0      | 0      | 0      | 0      | 0      | 0      | 0      | 0      | 0      |
| <b>Thermotoga</b>           | 2              | 80             | 1      | 0      | 1      | 0      | 0      | 0      | 1      | 0      | 0      | 0      | 1      | 0      | 0      | 0      | 0      | 0      | 0      | 0      |
| <b>Thermovibrio</b>         | 2              | 58             | 0      | 0      | 0      | 0      | 0      | 0      | 1      | 0      | 0      | 0      | 1      | 0      | 0      | 0      | 0      | 0      | 0      | 0      |
| <b>Thermovirga</b>          | 1              | 9              | 0      | 0      | 0      | 0      | 0      | 1      | 1      | 0      | 0      | 0      | 1      | 0      | 0      | 0      | 0      | 0      | 0      | 0      |
| <b>Thermus</b>              | 2              | 107            | 0      | 0      | 0      | 0      | 0      | 0      | 1      | 0      | 0      | 0      | 1      | 0      | 0      | 0      | 0      | 0      | 1      | 1      |
| <b>Thioalkalimicrobium</b>  | 1              | 4              | 0      | 0      | 0      | 0      | 0      | 0      | 0      | 0      | 0      | 0      | 0      | 0      | 0      | 0      | 0      | 0      | 0      | 0      |
| <b>Thioalkalivibrio</b>     | 2              | 91             | 0      | 0      | 1      | 1      | 1      | 0      | 0      | 0      | 1      | 0      | 1      | 0      | 1      | 0      | 0      | 0      | 0      | 1      |
| <b>Thiobaca</b>             | 1              | 2              | 0      | 0      | 0      | 0      | 0      | 0      | 0      | 0      | 0      | 0      | 0      | 0      | 0      | 0      | 0      | 0      | 0      | 0      |
| <b>Thiobacillus</b>         | 2              | 67             | 0      | 0      | 0      | 0      | 0      | 0      | 0      | 0      | 1      | 0      | 1      | 0      | 0      | 0      | 0      | 0      | 0      | 0      |
| <b>Thiocapsa</b>            | 1              | 2              | 0      | 0      | 0      | 0      | 0      | 0      | 0      | 0      | 0      | 0      | 0      | 0      | 0      | 0      | 0      | 0      | 0      | 0      |
| <b>Thiocystis</b>           | 1              | 11             | 0      | 0      | 0      | 1      | 0      | 0      | 0      | 0      | 0      | 0      | 1      | 0      | 0      | 0      | 0      | 0      | 0      | 0      |
| <b>Thioflavococcus</b>      | 1              | 13             | 0      | 0      | 0      | 0      | 0      | 0      | 0      | 0      | 0      | 0      | 1      | 0      | 0      | 0      | 0      | 0      | 0      | 0      |
| <b>Thiomicrospira</b>       | 2              | 50             | 0      | 0      | 0      | 0      | 1      | 0      | 0      | 0      | 0      | 0      | 0      | 0      | 0      | 0      | 0      | 0      | 0      | 0      |
| <b>Thiomonas</b>            | 2              | 85             | 0      | 0      | 1      | 1      | 0      | 1      | 0      | 0      | 1      | 0      | 1      | 0      | 0      | 0      | 0      | 0      | 0      | 1      |
| <b>Thiorhodococcus</b>      | 1              | 2              | 0      | 0      | 0      | 0      | 0      | 0      | 0      | 0      | 0      | 0      | 0      | 0      | 0      | 0      | 0      | 0      | 0      | 0      |
| <b>Thiothrix</b>            | 1              | 2              | 0      | 0      | 0      | 0      | 0      | 0      | 0      | 0      | 0      | 0      | 0      | 0      | 0      | 0      | 0      | 0      | 0      | 0      |
| <b>Tistrella</b>            | 1              | 42             | 0      | 0      | 1      | 1      | 0      | 1      | 0      | 0      | 0      | 1      | 1      | 1      | 1      | 1      | 1      | 0      | 1      | 1      |
| <b>Tolumonas</b>            | 2              | 100            | 1      | 0      | 0      | 1      | 1      | 0      | 1      | 0      | 0      | 0      | 1      | 0      | 0      | 0      | 0      | 0      | 0      | 1      |
| <b>Transposon</b>           | 1              | 2              | 1      | 0      | 0      | 0      | 0      | 0      | 0      | 0      | 0      | 0      | 0      | 0      | 0      | 0      | 0      | 0      | 0      | 0      |
| <b>Treponema</b>            | 1              | 63             | 0      | 0      | 0      | 0      | 0      | 1      | 1      | 0      | 0      | 0      | 1      | 0      | 0      | 0      | 0      | 0      | 0      | 1      |
| <b>Trichodesmium</b>        | 2              | 71             | 0      | 0      | 1      | 1      | 0      | 0      | 0      | 0      | 0      | 0      | 0      | 0      | 0      | 0      | 0      | 0      | 0      | 0      |
| <b>Trichormus</b>           | 1              | 12             | 0      | 0      | 1      | 0      | 0      | 0      | 0      | 0      | 0      | 0      | 0      | 0      | 0      | 0      | 0      | 0      | 0      | 0      |
| <b>Tropheryma</b>           | 2              | 22             | 0      | 0      | 0      | 0      | 0      | 0      | 0      | 0      | 0      | 0      | 0      | 0      | 0      | 0      | 0      | 0      | 0      | 0      |
| <b>Truepera</b>             | 2              | 104            | 0      | 0      | 1      | 0      | 0      | 1      | 1      | 0      | 0      | 0      | 1      | 0      | 0      | 0      | 0      | 0      | 0      | 1      |
| <b>Tsukamurella</b>         | 2              | 123            | 0      | 0      | 1      | 1      | 1      | 1      | 1      | 0      | 0      | 0      | 1      | 0      | 0      | 0      | 1      | 0      | 0      | 1      |
| <b>Turneriella</b>          | 1              | 16             | 0      | 0      | 1      | 0      | 0      | 0      | 1      | 0      | 0      | 0      | 1      | 0      | 0      | 0      | 0      | 0      | 0      | 0      |
| <b>Uliginosibacterium</b>   | 1              | 2              | 0      | 0      | 0      | 0      | 0      | 0      | 0      | 0      | 0      | 0      | 0      | 0      | 0      | 0      | 0      | 0      | 0      | 0      |
| <b>Ureaplasma</b>           | 1              | 24             | 0      | 0      | 0      | 1      | 0      | 0      | 1      | 0      | 0      | 0      | 0      | 0      | 0      | 0      | 0      | 0      | 0      | 0      |
| <b>Ureibacillus</b>         | 1              | 2              | 0      | 0      | 0      | 0      | 0      | 0      | 0      | 0      | 0      | 0      | 0      | 0      | 0      | 0      | 0      | 0      | 0      | 0      |
| <b>Variovorax</b>           | 3              | 187            | 0      | 0      | 1      | 1      | 1      | 1      | 0      | 0      | 1      | 1      | 1      | 1      | 1      | 1      | 0      | 0      | 0      | 1      |
| <b>Veillonella</b>          | 1              | 54             | 0      | 0      | 0      | 0      | 0      | 1      | 1      | 0      | 0      | 0      | 0      | 0      | 0      | 0      | 0      | 0      | 0      | 1      |
| <b>Verminephrobacter</b>    | 3              | 188            | 0      | 0      | 1      | 1      | 1      | 1      | 0      | 0      | 1      | 0      | 0      | 0      | 1      | 0      | 0      | 0      | 0      | 1      |
| <b>Verrucosispora</b>       | 3              | 126            | 0      | 0      | 1      | 1      | 0      | 0      | 1      | 0      | 0      | 0      | 0      | 1      | 0      | 0      | 0      | 0      | 1      | 1      |
| <b>Vibrio</b>               | 2              | 195            | 0      | 0      | 0      | 1      | 0      | 0      | 1      | 0      | 1      | 0      | 1      | 0      | 0      | 0      | 0      | 0      | 0      | 1      |
| <b>Vibrionales</b>          | 1              | 46             | 0      | 0      | 0      | 0      | 0      | 0      | 0      | 0      | 0      | 0      | 0      | 0      | 0      | 0      | 0      | 0      | 0      | 0      |
| <b>Vitreoscilla</b>         | 1              | 1              | 0      | 0      | 0      | 0      | 0      | 0      | 0      | 0      | 0      | 0      | 0      | 0      | 0      | 0      | 0      | 0      | 0      | 0      |
| <b>Vulcanisaeta</b>         | 1              | 14             | 0      | 0      | 0      | 0      | 0      | 0      | 1      | 0      | 0      | 0      | 1      | 0      | 0      | 0      | 0      | 0      | 0      | 0      |
| <b>Waddlia</b>              | 2              | 68             | 0      | 0      | 0      | 0      | 0      | 0      | 0      | 0      | 0      | 0      | 1      | 0      | 0      | 0      | 0      | 0      | 0      | 0      |
| <b>Wautersia</b>            | 1              | 2              | 0      | 0      | 0      | 0      | 0      | 0      | 0      | 0      | 0      | 0      | 0      | 0      | 0      | 0      | 0      | 0      | 0      | 0      |
| <b>Weeksella</b>            | 2              | 65             | 0      | 0      | 0      | 0      | 0      | 0      | 1      | 0      | 0      | 0      | 0      | 1      | 0      | 0      | 0      | 0      | 0      | 0      |

| Genus             | Cluster Number | Protein Counts | K01195 | K01253 | K01426 | K01428 | K01457 | K01464 | K01489 | K01500 | K01501 | K01502 | K01512 | K01555 | K01560 | K01561 | K01563 | K01564 | K01576 | K01607 |
|-------------------|----------------|----------------|--------|--------|--------|--------|--------|--------|--------|--------|--------|--------|--------|--------|--------|--------|--------|--------|--------|--------|
| Weissella         | 1              | 14             | 0      | 0      | 0      | 0      | 0      | 0      | 0      | 0      | 0      | 0      | 1      | 0      | 0      | 0      | 0      | 0      | 0      | 1      |
| Wenxinia          | 1              | 2              | 0      | 0      | 0      | 0      | 0      | 0      | 0      | 0      | 0      | 0      | 0      | 0      | 0      | 0      | 0      | 0      | 0      | 0      |
| Wigglesworthia    | 1              | 29             | 0      | 0      | 0      | 0      | 0      | 0      | 0      | 0      | 0      | 0      | 0      | 0      | 0      | 0      | 0      | 0      | 0      | 0      |
| Wolbachia         | 1              | 32             | 0      | 0      | 0      | 0      | 0      | 0      | 0      | 0      | 0      | 0      | 0      | 0      | 0      | 0      | 0      | 0      | 0      | 0      |
| Wolinella         | 2              | 51             | 0      | 0      | 0      | 0      | 1      | 0      | 0      | 0      | 0      | 0      | 0      | 0      | 0      | 0      | 0      | 1      | 0      | 0      |
| Xanthobacter      | 3              | 176            | 0      | 0      | 1      | 1      | 1      | 0      | 1      | 0      | 1      | 0      | 1      | 1      | 1      | 1      | 0      | 0      | 0      | 1      |
| Xanthobacteraceae | 1              | 4              | 0      | 0      | 1      | 0      | 0      | 0      | 0      | 0      | 0      | 0      | 0      | 0      | 0      | 0      | 0      | 0      | 0      | 0      |
| Xanthomonadaceae  | 1              | 39             | 0      | 0      | 0      | 0      | 0      | 0      | 0      | 0      | 0      | 0      | 0      | 0      | 0      | 0      | 0      | 0      | 0      | 0      |
| Xanthomonas       | 2              | 162            | 0      | 0      | 1      | 0      | 1      | 0      | 0      | 0      | 0      | 0      | 1      | 0      | 1      | 0      | 1      | 0      | 0      | 1      |
| Xenorhabdus       | 2              | 127            | 0      | 0      | 1      | 0      | 0      | 0      | 1      | 0      | 0      | 1      | 1      | 0      | 0      | 0      | 0      | 0      | 0      | 0      |
| Xylanimonas       | 2              | 66             | 0      | 0      | 1      | 0      | 0      | 0      | 1      | 0      | 0      | 0      | 0      | 0      | 0      | 0      | 0      | 0      | 1      | 0      |
| Xylella           | 2              | 52             | 0      | 0      | 0      | 0      | 0      | 0      | 0      | 0      | 0      | 0      | 0      | 0      | 0      | 0      | 1      | 0      | 0      | 0      |
| Yersinia          | 2              | 145            | 0      | 0      | 0      | 1      | 0      | 0      | 1      | 0      | 0      | 0      | 1      | 0      | 0      | 0      | 0      | 0      | 0      | 1      |
| Yokenella         | 2              | 61             | 0      | 0      | 0      | 0      | 0      | 0      | 0      | 0      | 0      | 0      | 0      | 0      | 0      | 0      | 0      | 0      | 0      | 0      |
| Zobellia          | 1              | 28             | 0      | 0      | 0      | 0      | 0      | 0      | 1      | 0      | 0      | 0      | 0      | 1      | 1      | 0      | 0      | 0      | 0      | 0      |
| Zunongwangia      | 2              | 98             | 1      | 0      | 1      | 0      | 0      | 0      | 1      | 0      | 0      | 0      | 0      | 1      | 1      | 0      | 0      | 0      | 0      | 1      |
| Zymomonas         | 2              | 67             | 0      | 0      | 0      | 0      | 0      | 0      | 1      | 0      | 1      | 0      | 0      | 0      | 0      | 0      | 0      | 0      | 0      | 1      |
| Zymophilus        | 1              | 2              | 0      | 0      | 0      | 0      | 0      | 0      | 0      | 0      | 0      | 0      | 0      | 0      | 0      | 0      | 0      | 0      | 0      | 0      |

| Genus               | Cluster Number | Protein Counts | K01612 | K01615 | K01617 | K01666 | K01692 | K01721 | K01726 | K01781 | K01800 | K01821 | K01822 | K01856 | K01857 | K01860 | K01913 | K01951 | K02554 | K03268 |
|---------------------|----------------|----------------|--------|--------|--------|--------|--------|--------|--------|--------|--------|--------|--------|--------|--------|--------|--------|--------|--------|--------|
| Acaricomes          | 1              | 2              | 0      | 0      | 0      | 0      | 0      | 0      | 0      | 0      | 0      | 0      | 0      | 0      | 0      | 0      | 0      | 0      | 0      | 0      |
| Acaryochloris       | 2              | 88             | 0      | 0      | 0      | 0      | 0      | 1      | 0      | 0      | 0      | 0      | 0      | 0      | 0      | 0      | 0      | 1      | 0      | 0      |
| Acetivibrio         | 1              | 2              | 0      | 0      | 0      | 0      | 0      | 0      | 0      | 0      | 0      | 0      | 0      | 0      | 0      | 0      | 0      | 0      | 0      | 0      |
| Acetobacter         | 2              | 85             | 0      | 0      | 0      | 0      | 0      | 0      | 0      | 0      | 0      | 0      | 0      | 0      | 0      | 0      | 0      | 1      | 0      | 0      |
| Acetobacteraceae    | 1              | 2              | 0      | 0      | 0      | 0      | 0      | 0      | 0      | 0      | 0      | 0      | 0      | 0      | 0      | 0      | 0      | 0      | 0      | 0      |
| Acetobacterium      | 1              | 8              | 0      | 0      | 0      | 0      | 0      | 0      | 0      | 0      | 0      | 0      | 0      | 0      | 0      | 0      | 0      | 1      | 0      | 0      |
| Acetohalobium       | 2              | 79             | 0      | 0      | 0      | 0      | 0      | 0      | 0      | 0      | 0      | 1      | 0      | 0      | 0      | 0      | 0      | 1      | 0      | 0      |
| Acholeplasma        | 2              | 38             | 0      | 0      | 0      | 0      | 0      | 0      | 0      | 0      | 0      | 0      | 0      | 0      | 0      | 0      | 0      | 0      | 0      | 0      |
| Achromobacter       | 2              | 192            | 0      | 0      | 0      | 1      | 1      | 0      | 0      | 0      | 1      | 1      | 0      | 1      | 0      | 0      | 0      | 1      | 1      | 0      |
| Acidaminococcus     | 1              | 65             | 0      | 1      | 0      | 0      | 0      | 0      | 0      | 0      | 0      | 0      | 0      | 0      | 0      | 0      | 0      | 1      | 0      | 0      |
| Acidianus           | 1              | 9              | 0      | 0      | 0      | 0      | 0      | 0      | 0      | 0      | 0      | 0      | 0      | 0      | 0      | 0      | 0      | 1      | 0      | 0      |
| Acidilobus          | 1              | 8              | 0      | 0      | 0      | 0      | 0      | 0      | 0      | 0      | 0      | 0      | 0      | 0      | 0      | 0      | 0      | 1      | 0      | 0      |
| Acidimicrobium      | 2              | 58             | 0      | 0      | 0      | 0      | 1      | 0      | 0      | 0      | 0      | 0      | 0      | 0      | 0      | 0      | 0      | 1      | 0      | 0      |
| Acidiphilium        | 3              | 144            | 0      | 0      | 0      | 0      | 1      | 1      | 0      | 0      | 0      | 1      | 0      | 0      | 1      | 0      | 0      | 1      | 0      | 0      |
| Acidithiobacillus   | 2              | 70             | 0      | 0      | 0      | 0      | 0      | 0      | 0      | 0      | 0      | 0      | 0      | 0      | 0      | 0      | 0      | 1      | 0      | 0      |
| Acidobacterium      | 2              | 91             | 0      | 0      | 0      | 0      | 0      | 0      | 0      | 0      | 0      | 0      | 0      | 0      | 0      | 0      | 0      | 1      | 0      | 0      |
| Acidocella          | 1              | 2              | 0      | 0      | 0      | 0      | 0      | 0      | 0      | 0      | 0      | 0      | 0      | 0      | 0      | 0      | 0      | 0      | 0      | 0      |
| Acidothermus        | 2              | 68             | 0      | 0      | 0      | 0      | 0      | 0      | 0      | 0      | 0      | 0      | 0      | 0      | 0      | 0      | 0      | 1      | 0      | 0      |
| Acidovorax          | 3              | 217            | 0      | 0      | 1      | 1      | 1      | 1      | 0      | 0      | 1      | 1      | 1      | 1      | 0      | 1      | 0      | 1      | 1      | 0      |
| Aciduliprofundum    | 1              | 11             | 0      | 0      | 0      | 0      | 0      | 0      | 0      | 0      | 0      | 0      | 0      | 0      | 0      | 0      | 0      | 1      | 0      | 0      |
| Acinetobacter       | 3              | 188            | 0      | 0      | 0      | 0      | 1      | 1      | 0      | 0      | 1      | 1      | 0      | 1      | 1      | 0      | 0      | 1      | 0      | 1      |
| Actinobacillus      | 2              | 112            | 0      | 0      | 0      | 0      | 0      | 0      | 0      | 0      | 0      | 1      | 0      | 0      | 0      | 0      | 0      | 1      | 0      | 0      |
| Actinomadura        | 1              | 1              | 0      | 0      | 0      | 0      | 0      | 0      | 0      | 0      | 0      | 0      | 0      | 0      | 0      | 0      | 0      | 0      | 0      | 0      |
| Actinoplanes        | 1              | 52             | 0      | 0      | 0      | 1      | 1      | 0      | 0      | 0      | 0      | 1      | 0      | 0      | 1      | 0      | 0      | 1      | 1      | 0      |
| Actinopolyspora     | 1              | 2              | 0      | 0      | 0      | 0      | 0      | 0      | 0      | 0      | 0      | 0      | 0      | 0      | 0      | 0      | 0      | 0      | 0      | 0      |
| Actinosynnema       | 2              | 122            | 0      | 0      | 0      | 0      | 1      | 0      | 0      | 0      | 0      | 1      | 0      | 0      | 1      | 0      | 0      | 1      | 0      | 0      |
| Advenella           | 1              | 30             | 0      | 0      | 0      | 0      | 1      | 0      | 0      | 0      | 0      | 0      | 0      | 1      | 1      | 0      | 0      | 1      | 0      | 0      |
| Aequorivita         | 1              | 12             | 0      | 0      | 0      | 0      | 0      | 0      | 0      | 0      | 0      | 0      | 0      | 0      | 0      | 0      | 0      | 1      | 0      | 0      |
| Aerococcus          | 2              | 57             | 0      | 0      | 0      | 0      | 0      | 0      | 0      | 0      | 0      | 1      | 0      | 0      | 0      | 0      | 0      | 1      | 0      | 0      |
| Aeromonas           | 2              | 127            | 0      | 0      | 0      | 0      | 0      | 0      | 0      | 0      | 0      | 0      | 0      | 0      | 0      | 0      | 0      | 1      | 0      | 0      |
| Aeropyrum           | 1              | 13             | 0      | 0      | 0      | 0      | 0      | 0      | 0      | 0      | 0      | 0      | 0      | 0      | 0      | 0      | 0      | 1      | 0      | 0      |
| Afipia              | 1              | 54             | 0      | 0      | 0      | 0      | 0      | 0      | 0      | 0      | 0      | 0      | 0      | 0      | 0      | 0      | 0      | 1      | 0      | 0      |
| Aggregatibacter     | 1              | 81             | 0      | 0      | 0      | 0      | 0      | 0      | 0      | 0      | 0      | 0      | 0      | 0      | 0      | 0      | 0      | 1      | 0      | 0      |
| Agrobacterium       | 2              | 242            | 0      | 0      | 1      | 1      | 1      | 1      | 0      | 1      | 1      | 1      | 0      | 1      | 1      | 0      | 0      | 1      | 0      | 0      |
| Ahrensia            | 1              | 2              | 0      | 0      | 0      | 0      | 0      | 0      | 0      | 0      | 0      | 0      | 0      | 0      | 0      | 0      | 0      | 0      | 0      | 0      |
| Akkermansia         | 2              | 47             | 0      | 0      | 0      | 0      | 0      | 0      | 0      | 0      | 0      | 0      | 0      | 0      | 0      | 0      | 0      | 1      | 0      | 0      |
| Albidiferax         | 3              | 144            | 0      | 0      | 0      | 1      | 1      | 0      | 0      | 0      | 0      | 1      | 0      | 0      | 1      | 0      | 0      | 1      | 0      | 0      |
| Alcaligenes         | 1              | 21             | 0      | 0      | 0      | 0      | 0      | 0      | 0      | 0      | 0      | 0      | 0      | 0      | 0      | 1      | 0      | 0      | 1      | 0      |
| Alcanivorax         | 2              | 146            | 0      | 0      | 0      | 0      | 1      | 0      | 0      | 0      | 0      | 1      | 0      | 0      | 0      | 0      | 0      | 1      | 0      | 0      |
| Alicyclophilus      | 3              | 152            | 0      | 0      | 1      | 1      | 1      | 0      | 0      | 0      | 1      | 1      | 0      | 1      | 0      | 0      | 0      | 1      | 1      | 0      |
| Alicyclobacillus    | 2              | 91             | 0      | 0      | 1      | 1      | 0      | 0      | 0      | 0      | 0      | 1      | 0      | 0      | 0      | 0      | 0      | 1      | 0      | 0      |
| Aliivibrio          | 2              | 118            | 0      | 0      | 0      | 0      | 0      | 0      | 1      | 0      | 0      | 0      | 0      | 0      | 0      | 0      | 0      | 1      | 0      | 0      |
| Alishewanella       | 1              | 1              | 0      | 0      | 0      | 0      | 0      | 0      | 0      | 0      | 0      | 0      | 0      | 0      | 0      | 0      | 0      | 0      | 0      | 0      |
| Alistipes           | 1              | 52             | 0      | 0      | 0      | 0      | 0      | 0      | 0      | 0      | 0      | 0      | 0      | 0      | 0      | 0      | 0      | 1      | 0      | 0      |
| Alkalilimnicola     | 2              | 97             | 0      | 0      | 0      | 1      | 0      | 0      | 0      | 0      | 0      | 0      | 0      | 0      | 0      | 0      | 0      | 1      | 1      | 0      |
| Alkaliphilus        | 2              | 62             | 0      | 0      | 0      | 0      | 0      | 0      | 0      | 0      | 0      | 0      | 0      | 0      | 0      | 0      | 0      | 1      | 0      | 0      |
| Allochromatium      | 2              | 84             | 0      | 0      | 0      | 1      | 0      | 0      | 0      | 0      | 0      | 0      | 0      | 0      | 0      | 0      | 0      | 1      | 0      | 0      |
| Alphaproteobacteria | 1              | 3              | 0      | 0      | 0      | 0      | 0      | 0      | 0      | 0      | 0      | 0      | 0      | 0      | 0      | 0      | 0      | 0      | 0      | 0      |
| Alteromonadales     | 1              | 12             | 0      | 0      | 0      | 0      | 0      | 0      | 0      | 0      | 0      | 0      | 0      | 0      | 0      | 0      | 0      | 0      | 0      | 0      |
| Alteromonas         | 1              | 37             | 0      | 0      | 0      | 0      | 1      | 0      | 0      | 0      | 1      | 0      | 0      | 1      | 0      | 0      | 0      | 1      | 1      | 0      |
| Aminobacter         | 1              | 4              | 0      | 0      | 0      | 0      | 0      | 0      | 0      | 0      | 0      | 0      | 0      | 0      | 0      | 0      | 0      | 0      | 0      | 0      |
| Aminobacterium      | 2              | 59             | 0      | 0      | 0      | 1      | 0      | 0      | 0      | 0      | 0      | 1      | 0      | 0      | 0      | 0      | 0      | 1      | 0      | 0      |

| Genus            | Cluster Number | Protein Counts | K01612 | K01615 | K01617 | K01666 | K01692 | K01721 | K01726 | K01781 | K01800 | K01821 | K01822 | K01856 | K01857 | K01860 | K01913 | K01951 | K02554 | K03268 |
|------------------|----------------|----------------|--------|--------|--------|--------|--------|--------|--------|--------|--------|--------|--------|--------|--------|--------|--------|--------|--------|--------|
| Ammonifex        | 2              | 50             | 0      | 0      | 0      | 0      | 0      | 0      | 0      | 0      | 0      | 0      | 0      | 0      | 0      | 0      | 0      | 1      | 0      | 0      |
| Amphibacillus    | 1              | 13             | 0      | 0      | 0      | 0      | 0      | 0      | 0      | 0      | 0      | 1      | 0      | 0      | 0      | 0      | 0      | 1      | 0      | 0      |
| Amphritea        | 1              | 2              | 0      | 0      | 0      | 0      | 0      | 0      | 0      | 0      | 0      | 0      | 0      | 0      | 0      | 0      | 0      | 0      | 0      | 0      |
| Amycolatopsis    | 2              | 201            | 0      | 0      | 1      | 1      | 1      | 0      | 0      | 0      | 0      | 1      | 0      | 1      | 1      | 0      | 0      | 1      | 1      | 0      |
| Amycolicoccus    | 1              | 43             | 0      | 0      | 0      | 1      | 1      | 0      | 0      | 0      | 0      | 1      | 1      | 0      | 0      | 0      | 1      | 1      | 0      | 0      |
| Anabaena         | 2              | 92             | 0      | 0      | 0      | 0      | 0      | 0      | 0      | 0      | 0      | 1      | 0      | 1      | 0      | 0      | 0      | 1      | 0      | 0      |
| Anaerobaculum    | 1              | 11             | 0      | 0      | 0      | 0      | 0      | 0      | 0      | 0      | 0      | 0      | 0      | 0      | 0      | 0      | 0      | 1      | 0      | 0      |
| Anaerococcus     | 2              | 46             | 0      | 0      | 0      | 0      | 0      | 0      | 0      | 0      | 0      | 0      | 0      | 0      | 0      | 0      | 0      | 1      | 0      | 0      |
| Anaerolinea      | 2              | 66             | 0      | 0      | 0      | 0      | 0      | 0      | 0      | 0      | 0      | 0      | 0      | 0      | 0      | 0      | 0      | 1      | 0      | 0      |
| Anaeromyxobacter | 3              | 117            | 0      | 0      | 0      | 0      | 0      | 0      | 0      | 0      | 0      | 1      | 0      | 0      | 0      | 0      | 0      | 1      | 0      | 0      |
| Anaerostipes     | 1              | 44             | 0      | 0      | 0      | 0      | 0      | 0      | 0      | 0      | 0      | 0      | 0      | 0      | 0      | 0      | 0      | 0      | 0      | 0      |
| Anaerotruncus    | 1              | 2              | 0      | 0      | 0      | 0      | 0      | 0      | 0      | 0      | 0      | 0      | 0      | 0      | 0      | 0      | 0      | 0      | 0      | 0      |
| Anaplasma        | 1              | 35             | 0      | 0      | 0      | 0      | 0      | 0      | 0      | 0      | 0      | 0      | 0      | 0      | 0      | 0      | 0      | 1      | 0      | 0      |
| Ancylobacter     | 1              | 3              | 0      | 0      | 0      | 0      | 0      | 0      | 0      | 0      | 0      | 0      | 0      | 0      | 0      | 0      | 0      | 0      | 0      | 0      |
| Aneurinibacillus | 1              | 1              | 0      | 0      | 0      | 0      | 0      | 0      | 0      | 0      | 0      | 0      | 0      | 0      | 0      | 0      | 0      | 0      | 0      | 0      |
| Angomonas        | 1              | 1              | 0      | 0      | 0      | 0      | 0      | 0      | 0      | 0      | 0      | 0      | 0      | 0      | 0      | 0      | 0      | 0      | 0      | 0      |
| Anoxybacillus    | 2              | 72             | 0      | 0      | 0      | 0      | 0      | 0      | 0      | 0      | 0      | 1      | 0      | 0      | 0      | 0      | 0      | 1      | 0      | 0      |
| Aquifex          | 2              | 45             | 0      | 0      | 0      | 0      | 0      | 0      | 0      | 0      | 0      | 0      | 0      | 0      | 0      | 0      | 0      | 1      | 0      | 0      |
| Aquimarina       | 1              | 2              | 0      | 0      | 0      | 0      | 0      | 0      | 0      | 0      | 0      | 0      | 0      | 0      | 0      | 0      | 0      | 0      | 0      | 0      |
| Arcanobacterium  | 2              | 45             | 0      | 0      | 0      | 0      | 0      | 0      | 0      | 0      | 0      | 0      | 0      | 0      | 0      | 0      | 0      | 1      | 0      | 0      |
| Archaeoglobus    | 1              | 14             | 0      | 0      | 0      | 0      | 0      | 0      | 0      | 0      | 0      | 1      | 0      | 0      | 0      | 0      | 0      | 1      | 0      | 0      |
| Arcobacter       | 2              | 101            | 0      | 0      | 1      | 1      | 0      | 0      | 0      | 0      | 0      | 1      | 0      | 0      | 0      | 0      | 0      | 1      | 1      | 0      |
| Aromatoleum      | 3              | 133            | 0      | 0      | 0      | 0      | 1      | 0      | 0      | 0      | 0      | 0      | 0      | 0      | 0      | 0      | 0      | 1      | 0      | 0      |
| Arsenophonus     | 1              | 4              | 0      | 0      | 0      | 0      | 0      | 0      | 0      | 0      | 0      | 0      | 0      | 0      | 0      | 0      | 0      | 0      | 0      | 0      |
| Arthrobacter     | 2              | 206            | 0      | 0      | 0      | 1      | 1      | 1      | 0      | 0      | 0      | 1      | 0      | 0      | 1      | 0      | 0      | 1      | 0      | 0      |
| Arthrospira      | 2              | 67             | 0      | 0      | 0      | 1      | 0      | 0      | 0      | 0      | 0      | 0      | 0      | 0      | 0      | 0      | 0      | 1      | 0      | 0      |
| Aster            | 1              | 10             | 0      | 0      | 0      | 0      | 0      | 0      | 0      | 0      | 0      | 0      | 0      | 0      | 0      | 0      | 0      | 0      | 0      | 0      |
| Asticcacaulis    | 2              | 103            | 0      | 0      | 0      | 0      | 1      | 0      | 0      | 0      | 0      | 0      | 0      | 0      | 0      | 0      | 0      | 1      | 1      | 0      |
| Atopobium        | 1              | 28             | 0      | 0      | 0      | 0      | 0      | 0      | 0      | 0      | 0      | 0      | 0      | 0      | 0      | 0      | 0      | 1      | 0      | 0      |
| Aurantimonas     | 1              | 2              | 0      | 0      | 0      | 0      | 0      | 0      | 0      | 0      | 0      | 0      | 0      | 0      | 0      | 0      | 0      | 0      | 0      | 0      |
| Avibacterium     | 1              | 17             | 0      | 0      | 0      | 0      | 0      | 0      | 0      | 0      | 0      | 0      | 0      | 0      | 0      | 0      | 0      | 1      | 0      | 0      |
| Azoarcus         | 3              | 172            | 0      | 0      | 1      | 1      | 1      | 0      | 0      | 0      | 1      | 1      | 1      | 0      | 1      | 0      | 0      | 1      | 1      | 0      |
| Azorhizobium     | 3              | 149            | 0      | 0      | 0      | 0      | 1      | 1      | 0      | 0      | 0      | 1      | 0      | 1      | 1      | 0      | 0      | 1      | 0      | 0      |
| Azorhizophilus   | 1              | 4              | 0      | 0      | 0      | 0      | 0      | 0      | 0      | 0      | 0      | 0      | 0      | 0      | 0      | 0      | 0      | 0      | 0      | 0      |
| Azospira         | 1              | 19             | 0      | 0      | 0      | 0      | 1      | 0      | 0      | 0      | 0      | 1      | 0      | 0      | 0      | 0      | 0      | 1      | 0      | 0      |
| Azospirillum     | 2              | 198            | 0      | 0      | 0      | 0      | 1      | 1      | 0      | 0      | 1      | 1      | 0      | 1      | 1      | 0      | 0      | 1      | 1      | 0      |
| Azotobacter      | 3              | 183            | 0      | 0      | 1      | 1      | 1      | 0      | 0      | 0      | 1      | 1      | 0      | 0      | 1      | 0      | 0      | 1      | 1      | 0      |
| Bacillales       | 1              | 9              | 0      | 0      | 0      | 0      | 0      | 0      | 0      | 0      | 0      | 1      | 0      | 0      | 0      | 0      | 0      | 0      | 0      | 0      |
| Bacilli          | 1              | 3              | 0      | 0      | 0      | 0      | 0      | 0      | 0      | 0      | 0      | 0      | 0      | 0      | 0      | 0      | 0      | 0      | 0      | 0      |
| Bacillus         | 2              | 237            | 0      | 0      | 1      | 1      | 0      | 1      | 1      | 0      | 0      | 1      | 0      | 1      | 1      | 0      | 1      | 1      | 1      | 0      |
| Bacteria         | 2              | 86             | 0      | 0      | 0      | 0      | 1      | 0      | 0      | 0      | 1      | 1      | 0      | 0      | 0      | 0      | 0      | 1      | 0      | 0      |
| Bacteriovorax    | 2              | 98             | 0      | 0      | 0      | 0      | 1      | 0      | 0      | 0      | 0      | 0      | 0      | 0      | 0      | 0      | 0      | 1      | 0      | 0      |
| Bacteroidales    | 2              | 59             | 0      | 0      | 0      | 0      | 0      | 0      | 0      | 0      | 0      | 0      | 0      | 0      | 0      | 0      | 0      | 1      | 0      | 0      |
| Bacteroides      | 2              | 96             | 0      | 0      | 0      | 1      | 0      | 0      | 0      | 0      | 0      | 0      | 0      | 0      | 0      | 0      | 0      | 1      | 0      | 0      |
| Bacteroidetes    | 1              | 2              | 0      | 0      | 0      | 0      | 0      | 0      | 0      | 0      | 0      | 0      | 0      | 0      | 0      | 0      | 0      | 0      | 0      | 0      |
| Bartonella       | 2              | 50             | 0      | 0      | 0      | 1      | 0      | 0      | 0      | 0      | 0      | 1      | 0      | 0      | 0      | 0      | 0      | 1      | 0      | 0      |
| Baumannia        | 2              | 24             | 0      | 0      | 0      | 0      | 0      | 0      | 0      | 0      | 0      | 0      | 0      | 0      | 0      | 0      | 0      | 1      | 0      | 0      |
| Bdellovibrio     | 2              | 87             | 0      | 0      | 0      | 0      | 0      | 0      | 0      | 0      | 1      | 1      | 0      | 0      | 0      | 0      | 0      | 1      | 0      | 0      |
| Beijerinckia     | 3              | 123            | 0      | 0      | 0      | 0      | 1      | 0      | 0      | 0      | 1      | 1      | 0      | 0      | 0      | 0      | 0      | 1      | 0      | 0      |
| Belliella        | 1              | 14             | 0      | 0      | 0      | 0      | 0      | 0      | 0      | 0      | 0      | 0      | 0      | 0      | 0      | 0      | 0      | 1      | 0      | 0      |
| Beutenbergia     | 2              | 82             | 0      | 0      | 0      | 0      | 0      | 0      | 0      | 0      | 0      | 0      | 0      | 0      | 0      | 0      | 0      | 1      | 0      | 0      |
| Bifidobacterium  | 2              | 61             | 0      | 0      | 0      | 0      | 0      | 0      | 0      | 0      | 0      | 0      | 0      | 0      | 0      | 0      | 0      | 1      | 0      | 0      |

| Genus                | Cluster Number | Protein Counts | K01612 | K01615 | K01617 | K01666 | K01692 | K01721 | K01726 | K01781 | K01800 | K01821 | K01822 | K01856 | K01857 | K01860 | K01913 | K01951 | K02554 | K03268 |
|----------------------|----------------|----------------|--------|--------|--------|--------|--------|--------|--------|--------|--------|--------|--------|--------|--------|--------|--------|--------|--------|--------|
| Bizionia             | 1              | 1              | 0      | 0      | 0      | 0      | 0      | 0      | 0      | 0      | 0      | 0      | 0      | 0      | 0      | 0      | 0      | 0      | 0      | 0      |
| Blastococcus         | 1              | 39             | 0      | 0      | 0      | 0      | 1      | 0      | 0      | 0      | 0      | 0      | 0      | 0      | 0      | 0      | 0      | 1      | 0      | 0      |
| Blattabacterium      | 1              | 23             | 0      | 0      | 0      | 0      | 0      | 0      | 0      | 0      | 0      | 0      | 0      | 0      | 0      | 0      | 0      | 1      | 0      | 0      |
| Blautia              | 1              | 22             | 0      | 0      | 0      | 0      | 0      | 0      | 0      | 0      | 0      | 0      | 0      | 0      | 0      | 0      | 0      | 0      | 0      | 0      |
| Bordetella           | 3              | 227            | 0      | 0      | 0      | 1      | 1      | 1      | 1      | 0      | 1      | 1      | 0      | 1      | 1      | 1      | 1      | 1      | 1      | 1      |
| Borrelia             | 1              | 32             | 0      | 0      | 0      | 0      | 0      | 0      | 0      | 0      | 0      | 0      | 0      | 0      | 0      | 0      | 0      | 1      | 0      | 0      |
| Brachybacterium      | 1              | 18             | 0      | 0      | 0      | 0      | 0      | 0      | 0      | 0      | 0      | 0      | 0      | 0      | 0      | 0      | 0      | 1      | 0      | 0      |
| Brachymonas          | 1              | 4              | 0      | 0      | 0      | 0      | 0      | 0      | 0      | 0      | 0      | 0      | 0      | 0      | 0      | 0      | 0      | 1      | 0      | 0      |
| Brachyspira          | 2              | 79             | 0      | 0      | 0      | 1      | 0      | 0      | 0      | 0      | 0      | 0      | 0      | 0      | 0      | 0      | 0      | 1      | 0      | 0      |
| Bradyrhizobiaceae    | 1              | 20             | 0      | 0      | 0      | 0      | 0      | 0      | 0      | 0      | 0      | 0      | 0      | 0      | 0      | 0      | 0      | 1      | 0      | 0      |
| Bradyrhizobium       | 3              | 254            | 0      | 0      | 1      | 0      | 1      | 1      | 1      | 1      | 1      | 1      | 0      | 1      | 1      | 0      | 1      | 1      | 0      | 0      |
| Brenneria            | 1              | 20             | 0      | 0      | 0      | 0      | 0      | 0      | 0      | 0      | 0      | 0      | 0      | 0      | 0      | 0      | 0      | 1      | 0      | 0      |
| Brevibacillus        | 2              | 122            | 0      | 0      | 1      | 1      | 1      | 0      | 0      | 0      | 0      | 1      | 0      | 0      | 0      | 0      | 0      | 1      | 0      | 0      |
| Brevibacterium       | 1              | 4              | 0      | 0      | 0      | 0      | 0      | 1      | 0      | 0      | 0      | 0      | 0      | 0      | 0      | 0      | 0      | 0      | 0      | 0      |
| Brevundimonas        | 2              | 105            | 0      | 0      | 0      | 0      | 1      | 0      | 0      | 0      | 1      | 0      | 0      | 0      | 0      | 0      | 0      | 1      | 1      | 0      |
| Brucella             | 3              | 138            | 0      | 0      | 0      | 0      | 1      | 0      | 1      | 0      | 0      | 0      | 0      | 0      | 1      | 0      | 0      | 1      | 0      | 0      |
| Buchnera             | 1              | 26             | 0      | 0      | 0      | 0      | 0      | 0      | 0      | 0      | 0      | 0      | 0      | 0      | 0      | 0      | 0      | 0      | 0      | 0      |
| Burkholderia         | 3              | 424            | 0      | 0      | 1      | 1      | 1      | 1      | 1      | 1      | 1      | 1      | 0      | 1      | 1      | 1      | 1      | 1      | 1      | 1      |
| Burkholderiaceae     | 3              | 143            | 0      | 0      | 1      | 1      | 1      | 0      | 1      | 0      | 0      | 1      | 1      | 1      | 1      | 1      | 1      | 1      | 1      | 0      |
| Burkholderiales      | 1              | 24             | 0      | 0      | 0      | 0      | 1      | 0      | 0      | 0      | 0      | 0      | 0      | 0      | 0      | 0      | 0      | 0      | 1      | 0      |
| Buttiauxella         | 1              | 2              | 0      | 0      | 0      | 0      | 0      | 1      | 0      | 0      | 0      | 0      | 0      | 0      | 0      | 0      | 0      | 0      | 0      | 0      |
| Butyrivibrio         | 2              | 67             | 0      | 0      | 0      | 1      | 0      | 0      | 0      | 0      | 0      | 1      | 0      | 0      | 0      | 0      | 0      | 1      | 0      | 0      |
| Caldanaerobacter     | 2              | 63             | 0      | 0      | 0      | 0      | 0      | 0      | 0      | 0      | 0      | 0      | 0      | 0      | 0      | 0      | 0      | 1      | 0      | 0      |
| Caldicellulosiruptor | 2              | 75             | 0      | 0      | 0      | 0      | 0      | 0      | 0      | 0      | 0      | 0      | 0      | 0      | 0      | 0      | 0      | 1      | 0      | 0      |
| Caldilinea           | 1              | 23             | 0      | 0      | 0      | 1      | 1      | 0      | 0      | 0      | 0      | 0      | 0      | 0      | 0      | 0      | 0      | 1      | 1      | 0      |
| Caldimonas           | 1              | 6              | 0      | 0      | 0      | 0      | 0      | 0      | 0      | 0      | 0      | 0      | 0      | 0      | 0      | 0      | 0      | 0      | 0      | 0      |
| Caldisericum         | 1              | 10             | 0      | 0      | 0      | 0      | 0      | 0      | 0      | 0      | 0      | 0      | 0      | 0      | 0      | 0      | 0      | 0      | 0      | 0      |
| Caldisphaera         | 1              | 7              | 0      | 0      | 0      | 0      | 0      | 0      | 0      | 0      | 0      | 0      | 0      | 0      | 0      | 0      | 0      | 1      | 0      | 0      |
| Calditerrivibrio     | 2              | 74             | 0      | 0      | 0      | 0      | 0      | 0      | 0      | 0      | 0      | 1      | 0      | 0      | 0      | 0      | 0      | 1      | 0      | 0      |
| Caldivirga           | 1              | 13             | 0      | 0      | 0      | 0      | 0      | 0      | 0      | 0      | 0      | 0      | 0      | 0      | 0      | 0      | 0      | 1      | 0      | 0      |
| Calothrix            | 1              | 43             | 0      | 0      | 0      | 0      | 0      | 0      | 0      | 0      | 0      | 1      | 0      | 0      | 0      | 0      | 0      | 1      | 0      | 0      |
| Calyptogena          | 2              | 34             | 0      | 0      | 0      | 0      | 0      | 0      | 0      | 0      | 0      | 0      | 0      | 0      | 0      | 0      | 0      | 1      | 0      | 0      |
| Campylobacter        | 2              | 80             | 0      | 0      | 0      | 1      | 0      | 0      | 0      | 0      | 0      | 1      | 0      | 0      | 0      | 0      | 0      | 1      | 0      | 0      |
| Candidatus           | 2              | 290            | 0      | 0      | 0      | 1      | 1      | 1      | 1      | 1      | 0      | 1      | 0      | 1      | 1      | 0      | 0      | 1      | 0      | 0      |
| Capnocytophaga       | 1              | 50             | 0      | 0      | 0      | 0      | 0      | 0      | 0      | 0      | 0      | 0      | 0      | 0      | 0      | 0      | 0      | 1      | 0      | 0      |
| Carbophilus          | 1              | 2              | 0      | 0      | 0      | 0      | 0      | 0      | 0      | 0      | 0      | 0      | 0      | 0      | 0      | 0      | 0      | 0      | 0      | 0      |
| Carboxydibrachium    | 1              | 14             | 0      | 0      | 0      | 0      | 0      | 0      | 0      | 0      | 0      | 0      | 0      | 0      | 0      | 0      | 0      | 1      | 0      | 0      |
| Carboxydotherrmus    | 2              | 68             | 0      | 0      | 0      | 1      | 0      | 0      | 0      | 0      | 0      | 1      | 0      | 0      | 0      | 0      | 0      | 1      | 0      | 0      |
| Carica               | 1              | 2              | 0      | 0      | 0      | 0      | 0      | 0      | 0      | 0      | 0      | 0      | 0      | 0      | 0      | 0      | 0      | 0      | 0      | 0      |
| Carnobacterium       | 2              | 71             | 0      | 0      | 0      | 0      | 0      | 0      | 0      | 0      | 0      | 1      | 0      | 0      | 0      | 0      | 0      | 1      | 0      | 0      |
| Catenibacterium      | 1              | 2              | 0      | 0      | 0      | 0      | 0      | 0      | 0      | 0      | 0      | 0      | 0      | 0      | 0      | 0      | 0      | 0      | 0      | 0      |
| Catenovulum          | 1              | 2              | 0      | 0      | 0      | 0      | 0      | 0      | 0      | 0      | 0      | 0      | 0      | 0      | 0      | 0      | 0      | 0      | 0      | 0      |
| Catenulispora        | 3              | 159            | 0      | 0      | 0      | 0      | 1      | 0      | 0      | 0      | 0      | 1      | 0      | 0      | 1      | 0      | 0      | 1      | 0      | 0      |
| Caulobacter          | 3              | 168            | 0      | 0      | 0      | 0      | 1      | 0      | 0      | 0      | 1      | 1      | 0      | 0      | 1      | 0      | 0      | 1      | 1      | 0      |
| Cedecea              | 1              | 45             | 0      | 0      | 0      | 0      | 0      | 0      | 0      | 0      | 0      | 0      | 0      | 0      | 0      | 0      | 0      | 1      | 0      | 0      |
| Cellulomonas         | 2              | 96             | 0      | 0      | 0      | 0      | 0      | 0      | 0      | 0      | 0      | 0      | 0      | 0      | 0      | 0      | 0      | 1      | 0      | 0      |
| Cellulophaga         | 2              | 105            | 0      | 0      | 0      | 0      | 0      | 0      | 0      | 0      | 0      | 0      | 0      | 0      | 0      | 0      | 0      | 1      | 0      | 0      |
| Cellulosilyticum     | 1              | 14             | 0      | 0      | 0      | 1      | 0      | 0      | 0      | 0      | 0      | 0      | 0      | 0      | 0      | 0      | 0      | 1      | 0      | 0      |
| Cellvibrio           | 2              | 85             | 0      | 0      | 0      | 0      | 0      | 0      | 0      | 0      | 0      | 0      | 0      | 0      | 0      | 0      | 0      | 1      | 0      | 0      |
| Cenarchaeum          | 1              | 7              | 0      | 0      | 0      | 0      | 0      | 0      | 0      | 0      | 0      | 1      | 0      | 0      | 0      | 0      | 0      | 1      | 0      | 0      |
| Chamaesiphon         | 1              | 13             | 0      | 0      | 0      | 0      | 0      | 1      | 0      | 0      | 0      | 1      | 0      | 0      | 0      | 0      | 0      | 1      | 0      | 0      |
| Chelativorans        | 3              | 136            | 0      | 0      | 0      | 0      | 1      | 0      | 0      | 0      | 1      | 0      | 0      | 0      | 1      | 0      | 0      | 1      | 0      | 0      |

| Genus                  | Cluster Number | Protein Counts | K01612 | K01615 | K01617 | K01666 | K01692 | K01721 | K01726 | K01781 | K01800 | K01821 | K01822 | K01856 | K01857 | K01860 | K01913 | K01951 | K02554 | K03268 |
|------------------------|----------------|----------------|--------|--------|--------|--------|--------|--------|--------|--------|--------|--------|--------|--------|--------|--------|--------|--------|--------|--------|
| Chelatococcus          | 1              | 2              | 0      | 0      | 0      | 0      | 0      | 0      | 0      | 0      | 0      | 0      | 0      | 0      | 0      | 0      | 0      | 0      | 0      | 0      |
| Chitinophaga           | 2              | 98             | 0      | 0      | 0      | 0      | 1      | 0      | 0      | 0      | 0      | 1      | 0      | 0      | 0      | 0      | 0      | 1      | 0      | 0      |
| Chlamydia              | 1              | 36             | 0      | 0      | 0      | 0      | 0      | 0      | 0      | 0      | 0      | 0      | 0      | 0      | 0      | 0      | 0      | 1      | 0      | 0      |
| Chlamydomonas          | 1              | 3              | 0      | 0      | 0      | 0      | 0      | 0      | 0      | 0      | 0      | 0      | 0      | 0      | 0      | 0      | 0      | 0      | 0      | 0      |
| Chlamydomphila         | 1              | 31             | 0      | 0      | 0      | 0      | 0      | 0      | 0      | 0      | 0      | 0      | 0      | 0      | 0      | 0      | 0      | 1      | 0      | 0      |
| Chlorobaculum          | 2              | 61             | 0      | 0      | 0      | 0      | 0      | 0      | 0      | 0      | 0      | 0      | 0      | 0      | 0      | 0      | 0      | 1      | 0      | 0      |
| Chlorobium             | 2              | 89             | 0      | 0      | 0      | 0      | 0      | 0      | 0      | 0      | 0      | 0      | 0      | 0      | 0      | 0      | 0      | 1      | 0      | 0      |
| Chlorobium/Pelodictyon | 1              | 2              | 0      | 0      | 0      | 0      | 0      | 0      | 0      | 0      | 0      | 0      | 0      | 0      | 0      | 0      | 0      | 0      | 0      | 0      |
| Chloroflexus           | 2              | 105            | 0      | 0      | 0      | 1      | 1      | 0      | 0      | 0      | 0      | 1      | 0      | 0      | 0      | 0      | 0      | 1      | 0      | 0      |
| Chlorogloeopsis        | 1              | 9              | 0      | 0      | 0      | 0      | 0      | 0      | 0      | 0      | 0      | 0      | 0      | 0      | 0      | 0      | 0      | 0      | 0      | 0      |
| Chloroherpeton         | 2              | 59             | 0      | 0      | 0      | 1      | 0      | 0      | 0      | 0      | 0      | 0      | 0      | 0      | 0      | 0      | 0      | 1      | 0      | 0      |
| Chromobacterium        | 2              | 117            | 0      | 0      | 0      | 0      | 0      | 0      | 0      | 0      | 1      | 0      | 0      | 0      | 0      | 0      | 0      | 1      | 0      | 0      |
| Chromohalobacter       | 2              | 145            | 0      | 0      | 0      | 0      | 0      | 0      | 0      | 0      | 0      | 0      | 0      | 0      | 1      | 0      | 0      | 1      | 0      | 0      |
| Chroococciopsis        | 1              | 24             | 0      | 0      | 0      | 0      | 0      | 0      | 0      | 0      | 0      | 0      | 0      | 0      | 0      | 0      | 0      | 1      | 0      | 0      |
| Chryseobacterium       | 2              | 104            | 0      | 0      | 0      | 0      | 0      | 0      | 0      | 0      | 0      | 0      | 0      | 1      | 0      | 0      | 0      | 1      | 0      | 0      |
| Citricella             | 1              | 13             | 0      | 0      | 0      | 0      | 0      | 0      | 0      | 0      | 0      | 0      | 0      | 0      | 0      | 0      | 0      | 0      | 0      | 0      |
| Citrobacter            | 2              | 190            | 0      | 0      | 0      | 1      | 0      | 0      | 0      | 0      | 0      | 0      | 0      | 0      | 1      | 0      | 0      | 1      | 1      | 0      |
| Clavibacter            | 2              | 83             | 0      | 0      | 0      | 0      | 0      | 0      | 0      | 0      | 0      | 0      | 0      | 0      | 0      | 0      | 0      | 1      | 0      | 0      |
| Clonorchis             | 1              | 1              | 0      | 0      | 0      | 0      | 0      | 0      | 0      | 0      | 0      | 0      | 0      | 0      | 0      | 0      | 0      | 0      | 0      | 0      |
| Clostridiales          | 2              | 77             | 0      | 0      | 0      | 0      | 0      | 0      | 0      | 0      | 0      | 0      | 0      | 0      | 0      | 0      | 0      | 1      | 0      | 0      |
| Clostridium            | 2              | 191            | 0      | 0      | 0      | 1      | 0      | 0      | 1      | 0      | 0      | 1      | 0      | 0      | 0      | 0      | 0      | 1      | 0      | 0      |
| Cohnella               | 1              | 2              | 0      | 0      | 0      | 0      | 0      | 0      | 0      | 0      | 0      | 0      | 0      | 0      | 0      | 0      | 0      | 0      | 0      | 0      |
| Coleofasciculus        | 1              | 4              | 0      | 0      | 0      | 0      | 0      | 0      | 0      | 0      | 0      | 0      | 0      | 0      | 0      | 0      | 0      | 0      | 0      | 0      |
| Collimonas             | 1              | 35             | 0      | 0      | 0      | 0      | 1      | 0      | 0      | 0      | 0      | 1      | 0      | 0      | 1      | 0      | 0      | 1      | 0      | 0      |
| Colwellia              | 2              | 130            | 0      | 0      | 0      | 0      | 0      | 0      | 0      | 0      | 1      | 1      | 0      | 0      | 0      | 0      | 0      | 1      | 0      | 0      |
| Comamonas              | 2              | 196            | 0      | 0      | 1      | 1      | 1      | 1      | 0      | 0      | 1      | 1      | 1      | 0      | 0      | 0      | 0      | 1      | 1      | 0      |
| Conexibacter           | 3              | 117            | 0      | 0      | 0      | 1      | 1      | 0      | 0      | 0      | 0      | 0      | 0      | 1      | 0      | 0      | 0      | 1      | 0      | 0      |
| Coprobacillus          | 1              | 2              | 0      | 0      | 0      | 0      | 0      | 0      | 0      | 0      | 0      | 0      | 0      | 0      | 0      | 0      | 0      | 0      | 0      | 0      |
| Coprococcus            | 2              | 76             | 0      | 0      | 0      | 1      | 0      | 0      | 0      | 0      | 0      | 0      | 0      | 0      | 0      | 0      | 0      | 1      | 0      | 0      |
| Coprothermobacter      | 2              | 45             | 0      | 0      | 0      | 0      | 0      | 0      | 0      | 0      | 0      | 0      | 0      | 0      | 0      | 0      | 0      | 1      | 0      | 0      |
| Coralimargarita        | 2              | 68             | 0      | 0      | 0      | 0      | 0      | 0      | 0      | 0      | 0      | 0      | 0      | 0      | 0      | 0      | 0      | 1      | 0      | 0      |
| Corallococcus          | 1              | 29             | 0      | 0      | 0      | 0      | 1      | 0      | 0      | 0      | 0      | 1      | 0      | 0      | 0      | 0      | 0      | 1      | 0      | 0      |
| Coriobacterium         | 2              | 36             | 0      | 0      | 0      | 0      | 0      | 0      | 0      | 0      | 0      | 0      | 0      | 0      | 0      | 0      | 0      | 1      | 0      | 0      |
| Corynebacterineae      | 1              | 5              | 0      | 0      | 0      | 0      | 1      | 0      | 0      | 0      | 0      | 0      | 0      | 0      | 0      | 0      | 0      | 0      | 0      | 0      |
| Corynebacterium        | 2              | 175            | 0      | 0      | 0      | 1      | 1      | 0      | 0      | 0      | 0      | 1      | 0      | 1      | 1      | 0      | 0      | 1      | 1      | 0      |
| Coxiella               | 2              | 54             | 0      | 0      | 0      | 0      | 0      | 0      | 0      | 0      | 0      | 0      | 0      | 0      | 0      | 0      | 0      | 1      | 0      | 0      |
| Crinalium              | 1              | 21             | 0      | 0      | 0      | 0      | 0      | 0      | 0      | 0      | 0      | 0      | 0      | 0      | 0      | 0      | 0      | 1      | 0      | 0      |
| Croceibacter           | 2              | 80             | 0      | 0      | 0      | 0      | 0      | 0      | 0      | 0      | 0      | 0      | 0      | 0      | 0      | 0      | 0      | 1      | 0      | 0      |
| Crocospaera            | 1              | 6              | 0      | 0      | 0      | 0      | 0      | 0      | 0      | 0      | 0      | 0      | 0      | 0      | 0      | 0      | 0      | 1      | 0      | 0      |
| Cronobacter            | 2              | 120            | 0      | 0      | 0      | 0      | 0      | 0      | 0      | 0      | 0      | 1      | 0      | 0      | 0      | 0      | 0      | 1      | 0      | 0      |
| Cryptobacterium        | 2              | 39             | 0      | 0      | 0      | 0      | 0      | 0      | 0      | 0      | 0      | 0      | 0      | 0      | 0      | 0      | 0      | 1      | 0      | 0      |
| Cucumis                | 1              | 9              | 0      | 0      | 0      | 0      | 0      | 0      | 0      | 0      | 0      | 0      | 0      | 0      | 0      | 0      | 0      | 0      | 0      | 0      |
| Cupriavidus            | 3              | 317            | 1      | 0      | 1      | 1      | 1      | 0      | 1      | 0      | 1      | 1      | 1      | 1      | 1      | 1      | 1      | 1      | 1      | 0      |
| Curtobacterium         | 1              | 5              | 0      | 0      | 0      | 0      | 0      | 1      | 0      | 0      | 0      | 0      | 0      | 0      | 0      | 0      | 0      | 1      | 0      | 0      |
| Curvibacter            | 1              | 27             | 0      | 0      | 0      | 0      | 0      | 0      | 0      | 0      | 0      | 0      | 0      | 0      | 1      | 0      | 0      | 1      | 0      | 0      |
| Cyanobacterium         | 1              | 9              | 0      | 0      | 0      | 0      | 0      | 0      | 0      | 0      | 0      | 0      | 0      | 0      | 0      | 0      | 0      | 1      | 0      | 0      |
| Cyanobium              | 1              | 10             | 0      | 0      | 0      | 0      | 0      | 0      | 0      | 0      | 0      | 0      | 0      | 0      | 0      | 0      | 0      | 1      | 0      | 0      |
| Cyanothece             | 1              | 34             | 0      | 0      | 0      | 0      | 0      | 0      | 0      | 0      | 0      | 1      | 1      | 0      | 0      | 0      | 0      | 1      | 0      | 0      |
| Cyclobacterium         | 1              | 19             | 0      | 0      | 0      | 0      | 0      | 0      | 0      | 0      | 0      | 0      | 0      | 0      | 0      | 0      | 0      | 1      | 0      | 0      |
| Cycloclasticus         | 1              | 21             | 0      | 0      | 0      | 1      | 1      | 0      | 0      | 0      | 0      | 1      | 0      | 0      | 0      | 0      | 0      | 1      | 1      | 0      |
| Cylindrospermopsis     | 1              | 4              | 0      | 0      | 0      | 0      | 0      | 0      | 0      | 0      | 0      | 0      | 0      | 0      | 0      | 0      | 0      | 0      | 0      | 0      |
| Cylindrospermum        | 1              | 30             | 0      | 0      | 0      | 0      | 0      | 0      | 0      | 0      | 0      | 0      | 0      | 0      | 0      | 0      | 0      | 1      | 0      | 0      |



| Genus              | Cluster Number | Protein Counts | K01612 | K01615 | K01617 | K01666 | K01692 | K01721 | K01726 | K01781 | K01800 | K01821 | K01822 | K01856 | K01857 | K01860 | K01913 | K01951 | K02554 | K03268 |
|--------------------|----------------|----------------|--------|--------|--------|--------|--------|--------|--------|--------|--------|--------|--------|--------|--------|--------|--------|--------|--------|--------|
| Cytophaga          | 2              | 69             | 0      | 0      | 0      | 0      | 0      | 0      | 0      | 0      | 0      | 1      | 0      | 0      | 0      | 0      | 0      | 1      | 0      | 0      |
| Dactylococcopsis   | 1              | 8              | 0      | 0      | 0      | 0      | 0      | 0      | 0      | 0      | 0      | 0      | 0      | 0      | 0      | 0      | 0      | 1      | 0      | 0      |
| Dechloromonas      | 1              | 40             | 0      | 0      | 1      | 1      | 1      | 0      | 0      | 0      | 0      | 1      | 0      | 0      | 0      | 0      | 0      | 1      | 1      | 0      |
| Dechlorosoma       | 1              | 19             | 0      | 0      | 0      | 0      | 1      | 0      | 0      | 0      | 0      | 1      | 0      | 0      | 0      | 0      | 0      | 1      | 0      | 0      |
| Deferribacter      | 2              | 73             | 0      | 0      | 0      | 0      | 0      | 0      | 0      | 0      | 0      | 1      | 0      | 0      | 0      | 0      | 0      | 1      | 0      | 0      |
| Dehalobacter       | 1              | 9              | 0      | 0      | 0      | 1      | 0      | 0      | 0      | 0      | 0      | 1      | 0      | 0      | 0      | 0      | 0      | 1      | 0      | 0      |
| Dehalococcoides    | 2              | 41             | 0      | 0      | 0      | 0      | 0      | 0      | 0      | 0      | 0      | 0      | 0      | 0      | 0      | 0      | 0      | 1      | 0      | 0      |
| Dehalogenimonas    | 1              | 37             | 0      | 0      | 0      | 0      | 0      | 0      | 0      | 0      | 0      | 0      | 0      | 0      | 0      | 0      | 0      | 1      | 0      | 0      |
| Deinococcus        | 2              | 140            | 0      | 0      | 0      | 0      | 1      | 0      | 0      | 0      | 0      | 0      | 0      | 0      | 1      | 0      | 0      | 1      | 0      | 0      |
| Delftia            | 3              | 177            | 0      | 0      | 1      | 1      | 1      | 0      | 0      | 0      | 1      | 1      | 0      | 1      | 1      | 0      | 0      | 1      | 1      | 0      |
| Denitrovibrio      | 2              | 67             | 0      | 0      | 0      | 0      | 0      | 0      | 0      | 0      | 0      | 1      | 0      | 0      | 0      | 0      | 0      | 1      | 0      | 0      |
| Desulfarculus      | 2              | 92             | 0      | 0      | 0      | 0      | 1      | 0      | 0      | 0      | 0      | 0      | 0      | 0      | 0      | 0      | 0      | 1      | 0      | 0      |
| Desulfatibacillum  | 3              | 84             | 0      | 0      | 0      | 0      | 1      | 0      | 0      | 0      | 0      | 0      | 0      | 0      | 0      | 0      | 0      | 1      | 0      | 0      |
| Desulfitobacterium | 2              | 102            | 0      | 0      | 0      | 1      | 0      | 0      | 0      | 0      | 0      | 1      | 0      | 0      | 0      | 0      | 0      | 1      | 0      | 0      |
| Desulfobacca       | 2              | 65             | 0      | 0      | 0      | 0      | 0      | 0      | 0      | 0      | 0      | 0      | 0      | 0      | 0      | 0      | 0      | 1      | 0      | 0      |
| Desulfobacterium   | 2              | 113            | 0      | 0      | 0      | 0      | 1      | 0      | 0      | 0      | 0      | 1      | 0      | 0      | 0      | 0      | 0      | 1      | 0      | 0      |
| Desulfobacula      | 1              | 21             | 0      | 0      | 0      | 0      | 0      | 0      | 0      | 0      | 0      | 0      | 0      | 0      | 0      | 0      | 0      | 1      | 0      | 0      |
| Desulfobulbus      | 2              | 88             | 0      | 0      | 0      | 0      | 0      | 0      | 0      | 0      | 0      | 1      | 0      | 0      | 0      | 0      | 0      | 1      | 0      | 0      |
| Desulfocapsa       | 1              | 9              | 0      | 0      | 0      | 0      | 0      | 0      | 0      | 0      | 0      | 1      | 0      | 0      | 0      | 0      | 0      | 1      | 0      | 0      |
| Desulfococcus      | 2              | 80             | 0      | 0      | 0      | 0      | 1      | 0      | 0      | 0      | 0      | 0      | 0      | 0      | 0      | 0      | 0      | 1      | 0      | 0      |
| Desulfohalobium    | 2              | 52             | 0      | 0      | 0      | 0      | 0      | 0      | 0      | 0      | 0      | 0      | 0      | 0      | 0      | 0      | 0      | 1      | 0      | 0      |
| Desulfomicrobium   | 2              | 65             | 0      | 0      | 0      | 0      | 0      | 0      | 0      | 0      | 0      | 1      | 0      | 0      | 0      | 0      | 0      | 1      | 0      | 0      |
| Desulfomonile      | 1              | 25             | 0      | 0      | 0      | 0      | 1      | 0      | 0      | 0      | 0      | 1      | 0      | 0      | 0      | 0      | 0      | 1      | 0      | 0      |
| Desulforhabdus     | 1              | 2              | 0      | 0      | 0      | 0      | 0      | 0      | 0      | 0      | 0      | 0      | 0      | 0      | 0      | 0      | 0      | 0      | 0      | 0      |
| Desulfosporosinus  | 1              | 30             | 0      | 0      | 0      | 1      | 1      | 0      | 0      | 0      | 0      | 1      | 0      | 0      | 0      | 0      | 0      | 1      | 1      | 0      |
| Desulfotalea       | 2              | 66             | 0      | 0      | 0      | 0      | 0      | 0      | 0      | 0      | 0      | 0      | 0      | 0      | 0      | 0      | 0      | 1      | 0      | 0      |
| Desulfotomaculum   | 2              | 98             | 0      | 0      | 0      | 1      | 0      | 0      | 0      | 0      | 0      | 1      | 0      | 0      | 0      | 0      | 0      | 1      | 1      | 0      |
| Desulfovibrio      | 2              | 144            | 0      | 0      | 0      | 1      | 0      | 0      | 0      | 0      | 0      | 1      | 0      | 0      | 0      | 0      | 0      | 1      | 0      | 0      |
| Desulfurispirillum | 2              | 78             | 0      | 0      | 0      | 0      | 0      | 0      | 0      | 0      | 0      | 1      | 0      | 0      | 0      | 0      | 0      | 1      | 0      | 0      |
| Desulfurivibrio    | 2              | 71             | 0      | 0      | 0      | 0      | 0      | 0      | 0      | 0      | 0      | 1      | 0      | 0      | 0      | 0      | 0      | 1      | 0      | 0      |
| Desulfurobacterium | 2              | 53             | 0      | 0      | 0      | 0      | 0      | 0      | 0      | 0      | 0      | 0      | 0      | 0      | 0      | 0      | 0      | 1      | 0      | 0      |
| Desulfurococcus    | 1              | 11             | 0      | 0      | 0      | 0      | 0      | 0      | 0      | 0      | 0      | 0      | 0      | 0      | 0      | 0      | 0      | 1      | 0      | 0      |
| Diaphorobacter     | 1              | 16             | 0      | 0      | 1      | 1      | 0      | 0      | 0      | 0      | 0      | 0      | 0      | 0      | 0      | 0      | 0      | 0      | 1      | 0      |
| Dichelobacter      | 2              | 45             | 0      | 0      | 0      | 0      | 0      | 0      | 0      | 0      | 0      | 0      | 0      | 0      | 0      | 0      | 0      | 1      | 0      | 0      |
| Dickeya            | 2              | 155            | 0      | 0      | 0      | 0      | 0      | 0      | 0      | 0      | 0      | 1      | 0      | 0      | 1      | 0      | 0      | 1      | 0      | 0      |
| Dictyoglomus       | 2              | 62             | 0      | 0      | 0      | 0      | 0      | 0      | 0      | 0      | 0      | 0      | 0      | 0      | 0      | 0      | 0      | 1      | 0      | 0      |
| Dinoroseobacter    | 3              | 148            | 0      | 0      | 0      | 0      | 1      | 1      | 0      | 0      | 0      | 0      | 0      | 0      | 1      | 0      | 0      | 1      | 0      | 0      |
| Dokdonia           | 1              | 3              | 0      | 0      | 0      | 0      | 0      | 0      | 0      | 0      | 0      | 0      | 0      | 0      | 0      | 0      | 0      | 0      | 0      | 0      |
| Dorea              | 1              | 7              | 0      | 0      | 0      | 0      | 0      | 0      | 0      | 0      | 0      | 0      | 0      | 0      | 0      | 0      | 0      | 0      | 0      | 0      |
| Dyadobacter        | 2              | 83             | 0      | 0      | 0      | 0      | 0      | 0      | 0      | 0      | 0      | 0      | 0      | 0      | 0      | 0      | 0      | 1      | 0      | 0      |
| Echinicola         | 1              | 20             | 0      | 0      | 0      | 0      | 0      | 0      | 0      | 0      | 0      | 0      | 0      | 0      | 0      | 0      | 0      | 1      | 0      | 0      |
| Edwardsiella       | 2              | 126            | 0      | 0      | 0      | 0      | 0      | 0      | 0      | 0      | 0      | 0      | 0      | 0      | 0      | 0      | 0      | 1      | 0      | 0      |
| Eggerthella        | 1              | 51             | 0      | 0      | 0      | 0      | 0      | 0      | 0      | 0      | 0      | 0      | 0      | 0      | 0      | 0      | 0      | 1      | 0      | 0      |
| Ehrlichia          | 2              | 37             | 0      | 0      | 0      | 0      | 0      | 0      | 0      | 0      | 0      | 0      | 0      | 0      | 0      | 0      | 0      | 1      | 0      | 0      |
| Eikenella          | 1              | 4              | 0      | 0      | 0      | 0      | 0      | 0      | 0      | 0      | 0      | 0      | 0      | 0      | 0      | 0      | 0      | 1      | 0      | 0      |
| Elusimicrobium     | 2              | 44             | 0      | 0      | 0      | 0      | 0      | 0      | 0      | 0      | 0      | 0      | 0      | 0      | 0      | 0      | 0      | 1      | 0      | 0      |
| Emticicia          | 1              | 21             | 0      | 0      | 0      | 0      | 1      | 0      | 0      | 0      | 0      | 0      | 0      | 0      | 1      | 0      | 0      | 1      | 0      | 0      |
| Enhydrobacter      | 1              | 1              | 0      | 0      | 0      | 0      | 0      | 0      | 0      | 0      | 0      | 0      | 0      | 0      | 0      | 0      | 0      | 0      | 0      | 0      |
| Ensifer            | 1              | 2              | 0      | 0      | 0      | 0      | 0      | 0      | 0      | 0      | 0      | 0      | 0      | 0      | 0      | 0      | 0      | 0      | 0      | 0      |
| Enterobacter       | 2              | 202            | 0      | 0      | 0      | 0      | 1      | 0      | 0      | 0      | 0      | 1      | 0      | 1      | 1      | 0      | 0      | 1      | 0      | 0      |
| Enterobacteriaceae | 2              | 211            | 0      | 0      | 0      | 1      | 1      | 0      | 0      | 0      | 0      | 1      | 0      | 1      | 1      | 0      | 0      | 1      | 1      | 0      |
| Enterococcus       | 1              | 187            | 0      | 0      | 0      | 1      | 1      | 0      | 0      | 0      | 0      | 1      | 0      | 1      | 0      | 0      | 0      | 1      | 1      | 0      |

| Genus               | Cluster Number | Protein Counts | K01612 | K01615 | K01617 | K01666 | K01692 | K01721 | K01726 | K01781 | K01800 | K01821 | K01822 | K01856 | K01857 | K01860 | K01913 | K01951 | K02554 | K03268 |
|---------------------|----------------|----------------|--------|--------|--------|--------|--------|--------|--------|--------|--------|--------|--------|--------|--------|--------|--------|--------|--------|--------|
| Enterovibrio        | 1              | 15             | 0      | 0      | 0      | 0      | 0      | 0      | 0      | 0      | 0      | 0      | 0      | 0      | 0      | 0      | 0      | 1      | 0      | 0      |
| Erwinia             | 2              | 151            | 0      | 0      | 0      | 1      | 0      | 0      | 0      | 0      | 0      | 1      | 0      | 0      | 0      | 0      | 0      | 1      | 0      | 0      |
| Erysipelothrix      | 1              | 9              | 0      | 0      | 0      | 0      | 0      | 0      | 0      | 0      | 0      | 0      | 0      | 0      | 0      | 0      | 0      | 1      | 0      | 0      |
| Erysipelotrichaceae | 1              | 4              | 0      | 0      | 0      | 0      | 0      | 0      | 0      | 0      | 0      | 0      | 0      | 0      | 0      | 0      | 0      | 0      | 0      | 0      |
| Erythrobacter       | 2              | 80             | 0      | 0      | 0      | 0      | 1      | 0      | 0      | 0      | 1      | 0      | 0      | 0      | 0      | 0      | 0      | 1      | 0      | 0      |
| Escherichia         | 2              | 242            | 0      | 0      | 0      | 1      | 1      | 0      | 0      | 0      | 0      | 1      | 0      | 1      | 1      | 0      | 0      | 1      | 1      | 0      |
| Ethanoligenens      | 2              | 69             | 0      | 0      | 0      | 0      | 0      | 0      | 0      | 0      | 0      | 0      | 0      | 0      | 0      | 0      | 0      | 1      | 0      | 0      |
| Eubacteriaceae      | 1              | 2              | 0      | 0      | 0      | 0      | 0      | 0      | 0      | 0      | 0      | 0      | 0      | 0      | 0      | 0      | 0      | 0      | 0      | 0      |
| Eubacterium         | 2              | 103            | 0      | 0      | 0      | 1      | 0      | 0      | 0      | 0      | 0      | 0      | 0      | 0      | 0      | 0      | 0      | 1      | 0      | 0      |
| Eudoraea            | 1              | 4              | 0      | 0      | 0      | 0      | 0      | 0      | 0      | 0      | 0      | 0      | 0      | 0      | 0      | 0      | 0      | 0      | 0      | 0      |
| Euryarchaeota       | 1              | 1              | 0      | 0      | 0      | 0      | 0      | 0      | 0      | 0      | 0      | 0      | 0      | 0      | 0      | 0      | 0      | 0      | 0      | 0      |
| Exiguobacterium     | 2              | 93             | 0      | 0      | 0      | 0      | 1      | 0      | 0      | 0      | 0      | 1      | 0      | 0      | 0      | 0      | 0      | 1      | 0      | 0      |
| Faecalibacterium    | 1              | 12             | 0      | 0      | 0      | 0      | 0      | 0      | 0      | 0      | 0      | 0      | 0      | 0      | 0      | 0      | 0      | 1      | 0      | 0      |
| Ferrimonas          | 2              | 115            | 0      | 0      | 0      | 0      | 0      | 0      | 0      | 0      | 1      | 0      | 0      | 0      | 0      | 0      | 0      | 1      | 0      | 0      |
| Ferroglobus         | 1              | 14             | 0      | 0      | 0      | 0      | 0      | 0      | 0      | 0      | 0      | 1      | 0      | 0      | 0      | 0      | 0      | 1      | 0      | 0      |
| Ferroplasma         | 1              | 11             | 0      | 0      | 0      | 0      | 1      | 0      | 0      | 0      | 0      | 0      | 0      | 0      | 0      | 0      | 0      | 1      | 0      | 0      |
| Fervidicoccus       | 1              | 7              | 0      | 0      | 0      | 0      | 0      | 0      | 0      | 0      | 0      | 0      | 0      | 0      | 0      | 0      | 0      | 1      | 0      | 0      |
| Fervidobacterium    | 2              | 54             | 0      | 0      | 0      | 0      | 0      | 0      | 0      | 0      | 0      | 0      | 0      | 0      | 0      | 0      | 0      | 1      | 0      | 0      |
| Fibrella            | 1              | 17             | 0      | 0      | 0      | 0      | 1      | 0      | 0      | 0      | 0      | 0      | 0      | 0      | 0      | 0      | 0      | 1      | 0      | 0      |
| Fibrobacter         | 2              | 52             | 0      | 0      | 0      | 1      | 0      | 0      | 0      | 0      | 0      | 0      | 0      | 0      | 0      | 0      | 0      | 1      | 0      | 0      |
| Filifactor          | 1              | 9              | 0      | 0      | 0      | 0      | 0      | 0      | 0      | 0      | 0      | 0      | 0      | 0      | 0      | 0      | 0      | 1      | 0      | 0      |
| Finegoldia          | 2              | 55             | 0      | 0      | 0      | 0      | 0      | 0      | 0      | 0      | 0      | 0      | 0      | 0      | 0      | 0      | 0      | 1      | 0      | 0      |
| Firmicutes          | 1              | 15             | 0      | 0      | 0      | 0      | 0      | 0      | 0      | 0      | 0      | 1      | 0      | 0      | 0      | 0      | 0      | 1      | 0      | 0      |
| Fischerella         | 1              | 15             | 0      | 0      | 0      | 0      | 0      | 0      | 0      | 0      | 0      | 0      | 0      | 0      | 0      | 0      | 0      | 1      | 0      | 0      |
| Flavobacteria       | 1              | 7              | 0      | 0      | 0      | 0      | 0      | 0      | 0      | 0      | 0      | 0      | 0      | 0      | 0      | 0      | 0      | 0      | 0      | 0      |
| Flavobacteriaceae   | 2              | 69             | 0      | 0      | 0      | 0      | 0      | 0      | 0      | 0      | 0      | 0      | 0      | 0      | 0      | 0      | 0      | 1      | 0      | 0      |
| Flavobacteriales    | 1              | 3              | 0      | 0      | 0      | 0      | 0      | 0      | 0      | 0      | 0      | 0      | 0      | 0      | 0      | 0      | 0      | 0      | 0      | 0      |
| Flavobacterium      | 2              | 103            | 0      | 0      | 0      | 0      | 0      | 0      | 0      | 0      | 0      | 1      | 0      | 0      | 0      | 0      | 0      | 1      | 0      | 0      |
| Flexibacter         | 1              | 17             | 0      | 0      | 0      | 0      | 0      | 0      | 0      | 0      | 0      | 0      | 0      | 0      | 0      | 0      | 0      | 1      | 0      | 0      |
| Flexistipes         | 1              | 11             | 0      | 0      | 0      | 0      | 0      | 0      | 0      | 0      | 0      | 1      | 0      | 0      | 0      | 0      | 0      | 1      | 0      | 0      |
| Fluoribacter        | 1              | 6              | 0      | 0      | 0      | 0      | 0      | 0      | 0      | 0      | 0      | 0      | 0      | 0      | 0      | 0      | 0      | 0      | 0      | 0      |
| Fluviicola          | 2              | 69             | 0      | 0      | 0      | 0      | 0      | 0      | 0      | 0      | 0      | 0      | 0      | 0      | 0      | 0      | 0      | 1      | 0      | 0      |
| Formosa             | 1              | 2              | 0      | 0      | 0      | 0      | 0      | 0      | 0      | 0      | 0      | 0      | 0      | 0      | 0      | 0      | 0      | 0      | 0      | 0      |
| Francisella         | 2              | 88             | 0      | 0      | 0      | 0      | 0      | 0      | 0      | 0      | 0      | 0      | 0      | 0      | 0      | 0      | 0      | 1      | 0      | 0      |
| Frankia             | 3              | 202            | 0      | 0      | 1      | 1      | 1      | 0      | 1      | 0      | 0      | 1      | 1      | 0      | 1      | 0      | 1      | 1      | 1      | 0      |
| Frateuria           | 1              | 25             | 0      | 0      | 0      | 0      | 0      | 0      | 0      | 0      | 0      | 0      | 0      | 1      | 0      | 0      | 0      | 1      | 0      | 0      |
| Fructobacillus      | 1              | 2              | 0      | 0      | 0      | 0      | 0      | 0      | 0      | 0      | 0      | 0      | 0      | 0      | 0      | 0      | 0      | 0      | 0      | 0      |
| Fulvimarina         | 1              | 2              | 0      | 0      | 0      | 0      | 0      | 0      | 0      | 0      | 0      | 0      | 0      | 0      | 0      | 0      | 0      | 0      | 0      | 0      |
| Fusobacterium       | 1              | 48             | 0      | 1      | 0      | 0      | 0      | 0      | 1      | 0      | 0      | 0      | 0      | 0      | 0      | 0      | 0      | 1      | 0      | 0      |
| Gallibacterium      | 2              | 87             | 0      | 0      | 0      | 0      | 0      | 0      | 0      | 0      | 0      | 0      | 0      | 0      | 0      | 0      | 0      | 1      | 0      | 0      |
| Gallionella         | 2              | 67             | 0      | 0      | 0      | 0      | 0      | 0      | 0      | 0      | 0      | 1      | 0      | 0      | 0      | 0      | 0      | 1      | 0      | 0      |
| Gammaproteobacteria | 1              | 9              | 0      | 0      | 0      | 0      | 0      | 0      | 0      | 0      | 0      | 0      | 0      | 0      | 0      | 0      | 0      | 0      | 0      | 0      |
| Gardnerella         | 1              | 31             | 0      | 0      | 0      | 0      | 0      | 0      | 0      | 0      | 0      | 0      | 0      | 0      | 0      | 0      | 0      | 1      | 0      | 0      |
| Geitlerinema        | 1              | 9              | 0      | 0      | 0      | 0      | 0      | 0      | 0      | 0      | 0      | 0      | 0      | 0      | 0      | 0      | 0      | 1      | 0      | 0      |
| Gemmatimonas        | 2              | 93             | 0      | 0      | 0      | 0      | 0      | 0      | 0      | 0      | 0      | 0      | 0      | 0      | 0      | 0      | 0      | 1      | 0      | 0      |
| Geobacillus         | 2              | 168            | 0      | 0      | 1      | 1      | 1      | 0      | 0      | 0      | 0      | 1      | 0      | 0      | 0      | 0      | 0      | 1      | 1      | 0      |
| Geobacter           | 2              | 150            | 0      | 0      | 0      | 1      | 0      | 0      | 0      | 0      | 0      | 1      | 0      | 0      | 0      | 0      | 0      | 1      | 0      | 0      |
| Geodermatophilus    | 2              | 136            | 0      | 0      | 0      | 0      | 1      | 1      | 0      | 0      | 0      | 0      | 0      | 0      | 1      | 0      | 0      | 1      | 0      | 0      |
| Geopsychrobacter    | 1              | 2              | 0      | 0      | 0      | 0      | 0      | 0      | 0      | 0      | 0      | 0      | 0      | 0      | 0      | 0      | 0      | 0      | 0      | 0      |
| Gillisia            | 1              | 11             | 0      | 0      | 0      | 0      | 0      | 0      | 0      | 0      | 0      | 0      | 0      | 0      | 0      | 0      | 0      | 0      | 0      | 0      |
| Gilvimarinus        | 1              | 4              | 0      | 0      | 0      | 0      | 0      | 0      | 0      | 0      | 0      | 0      | 0      | 0      | 0      | 0      | 0      | 0      | 0      | 0      |
| Glaciecola          | 2              | 117            | 0      | 0      | 0      | 0      | 1      | 0      | 0      | 0      | 1      | 0      | 0      | 0      | 0      | 0      | 0      | 1      | 0      | 0      |

| Genus             | Cluster Number | Protein Counts | K01612 | K01615 | K01617 | K01666 | K01692 | K01721 | K01726 | K01781 | K01800 | K01821 | K01822 | K01856 | K01857 | K01860 | K01913 | K01951 | K02554 | K03268 |
|-------------------|----------------|----------------|--------|--------|--------|--------|--------|--------|--------|--------|--------|--------|--------|--------|--------|--------|--------|--------|--------|--------|
| Gloeobacter       | 2              | 67             | 0      | 0      | 0      | 0      | 0      | 0      | 0      | 0      | 0      | 0      | 0      | 0      | 0      | 0      | 0      | 1      | 0      | 0      |
| Gloeocapsa        | 1              | 20             | 0      | 0      | 0      | 0      | 0      | 1      | 0      | 0      | 0      | 0      | 0      | 0      | 0      | 0      | 0      | 1      | 0      | 0      |
| Gloeotheca        | 1              | 1              | 0      | 0      | 0      | 0      | 0      | 0      | 0      | 0      | 0      | 0      | 0      | 0      | 0      | 0      | 0      | 0      | 0      | 0      |
| Gluconacetobacter | 2              | 96             | 0      | 0      | 0      | 0      | 1      | 0      | 0      | 0      | 0      | 1      | 0      | 0      | 1      | 0      | 0      | 1      | 1      | 0      |
| Gluconobacter     | 2              | 76             | 0      | 0      | 0      | 0      | 0      | 0      | 0      | 0      | 0      | 0      | 0      | 0      | 0      | 0      | 0      | 1      | 0      | 0      |
| Gordonia          | 1              | 158            | 0      | 0      | 1      | 1      | 1      | 1      | 0      | 0      | 0      | 1      | 1      | 0      | 1      | 0      | 0      | 1      | 0      | 0      |
| Gordonibacter     | 1              | 32             | 0      | 0      | 0      | 0      | 0      | 0      | 0      | 0      | 0      | 0      | 0      | 0      | 0      | 0      | 0      | 1      | 0      | 0      |
| Gramella          | 2              | 104            | 0      | 0      | 0      | 0      | 0      | 0      | 1      | 0      | 0      | 0      | 0      | 0      | 0      | 0      | 0      | 1      | 0      | 0      |
| Granulibacter     | 2              | 90             | 0      | 0      | 0      | 0      | 1      | 0      | 0      | 0      | 0      | 0      | 0      | 0      | 0      | 0      | 0      | 1      | 0      | 0      |
| Granulicella      | 2              | 98             | 0      | 0      | 0      | 0      | 0      | 0      | 0      | 0      | 0      | 0      | 0      | 0      | 0      | 0      | 0      | 1      | 0      | 0      |
| Grimontia         | 1              | 9              | 0      | 0      | 0      | 0      | 0      | 0      | 0      | 0      | 0      | 0      | 0      | 0      | 0      | 0      | 0      | 0      | 0      | 0      |
| Haemophilus       | 2              | 117            | 0      | 0      | 0      | 0      | 0      | 0      | 0      | 0      | 0      | 1      | 0      | 0      | 0      | 0      | 0      | 1      | 0      | 0      |
| Hafnia            | 1              | 29             | 0      | 0      | 0      | 0      | 0      | 0      | 0      | 0      | 0      | 0      | 0      | 0      | 0      | 0      | 0      | 1      | 0      | 0      |
| Hahella           | 3              | 130            | 0      | 0      | 0      | 0      | 1      | 0      | 0      | 0      | 0      | 1      | 0      | 0      | 0      | 0      | 0      | 1      | 0      | 0      |
| Halalkalicoccus   | 1              | 18             | 0      | 0      | 0      | 0      | 0      | 0      | 0      | 0      | 0      | 0      | 0      | 0      | 0      | 0      | 0      | 1      | 0      | 0      |
| Halanaerobium     | 2              | 89             | 0      | 0      | 0      | 0      | 0      | 0      | 0      | 0      | 0      | 0      | 0      | 0      | 0      | 0      | 0      | 1      | 0      | 0      |
| Haliangium        | 2              | 108            | 0      | 0      | 0      | 1      | 1      | 0      | 0      | 0      | 0      | 0      | 0      | 0      | 0      | 0      | 0      | 1      | 0      | 0      |
| Haliscomenobacter | 2              | 107            | 0      | 0      | 0      | 0      | 0      | 0      | 0      | 0      | 0      | 0      | 0      | 0      | 1      | 0      | 0      | 1      | 0      | 0      |
| Haloarcula        | 1              | 22             | 0      | 0      | 0      | 0      | 0      | 0      | 1      | 0      | 0      | 0      | 0      | 0      | 0      | 0      | 0      | 1      | 0      | 0      |
| Halobacillus      | 1              | 19             | 0      | 0      | 0      | 0      | 0      | 0      | 0      | 0      | 0      | 0      | 0      | 0      | 0      | 0      | 0      | 1      | 0      | 0      |
| Halobacteriaceae  | 1              | 1              | 0      | 0      | 0      | 0      | 0      | 0      | 0      | 0      | 0      | 0      | 0      | 0      | 0      | 0      | 0      | 0      | 0      | 0      |
| Halobacterium     | 1              | 10             | 0      | 0      | 0      | 0      | 0      | 0      | 0      | 0      | 0      | 0      | 0      | 0      | 0      | 0      | 0      | 1      | 0      | 0      |
| Halobacteroides   | 1              | 14             | 0      | 0      | 0      | 0      | 0      | 0      | 0      | 0      | 0      | 1      | 0      | 0      | 0      | 0      | 0      | 1      | 0      | 0      |
| Haloferax         | 1              | 20             | 0      | 0      | 0      | 0      | 0      | 0      | 0      | 0      | 0      | 0      | 0      | 0      | 0      | 0      | 0      | 1      | 0      | 0      |
| Halogeometricum   | 1              | 12             | 0      | 0      | 0      | 0      | 0      | 0      | 0      | 0      | 0      | 0      | 0      | 0      | 0      | 0      | 0      | 1      | 0      | 0      |
| Halomicrobium     | 1              | 10             | 0      | 0      | 0      | 0      | 0      | 0      | 0      | 0      | 0      | 0      | 0      | 0      | 0      | 0      | 0      | 1      | 0      | 0      |
| Halomonas         | 1              | 149            | 0      | 0      | 0      | 0      | 0      | 0      | 0      | 0      | 0      | 0      | 0      | 0      | 1      | 0      | 0      | 1      | 0      | 0      |
| Halopiger         | 1              | 16             | 0      | 0      | 0      | 0      | 0      | 0      | 0      | 0      | 0      | 0      | 0      | 0      | 0      | 0      | 0      | 1      | 0      | 0      |
| Haloquadratum     | 1              | 19             | 0      | 0      | 0      | 0      | 0      | 0      | 0      | 0      | 0      | 0      | 0      | 0      | 0      | 0      | 0      | 1      | 0      | 0      |
| Halorhabdus       | 1              | 10             | 0      | 0      | 0      | 0      | 0      | 0      | 0      | 0      | 0      | 0      | 0      | 0      | 0      | 0      | 0      | 1      | 0      | 0      |
| Halorhodospira    | 2              | 71             | 0      | 0      | 0      | 0      | 0      | 0      | 0      | 0      | 0      | 0      | 0      | 0      | 0      | 0      | 0      | 1      | 0      | 0      |
| Halorubrum        | 1              | 16             | 0      | 0      | 0      | 0      | 0      | 0      | 0      | 0      | 0      | 0      | 0      | 0      | 0      | 0      | 0      | 1      | 0      | 0      |
| Haloterrigena     | 1              | 19             | 0      | 0      | 0      | 0      | 0      | 0      | 0      | 0      | 0      | 0      | 0      | 0      | 0      | 0      | 0      | 1      | 0      | 0      |
| Halothece         | 1              | 9              | 0      | 0      | 0      | 0      | 0      | 0      | 0      | 0      | 0      | 1      | 0      | 0      | 0      | 0      | 0      | 1      | 0      | 0      |
| Halothermothrix   | 2              | 50             | 0      | 0      | 0      | 0      | 0      | 0      | 0      | 0      | 0      | 0      | 0      | 0      | 0      | 0      | 0      | 1      | 0      | 0      |
| Halothiobacillus  | 2              | 65             | 0      | 0      | 0      | 0      | 0      | 0      | 0      | 0      | 0      | 1      | 0      | 0      | 0      | 0      | 0      | 1      | 0      | 0      |
| Halovivax         | 1              | 12             | 0      | 0      | 0      | 0      | 0      | 0      | 0      | 0      | 0      | 0      | 0      | 0      | 0      | 0      | 0      | 1      | 0      | 0      |
| Helicobacter      | 2              | 79             | 0      | 0      | 0      | 0      | 0      | 0      | 0      | 0      | 0      | 1      | 0      | 0      | 0      | 0      | 0      | 1      | 0      | 0      |
| Heliobacillus     | 1              | 4              | 0      | 0      | 0      | 0      | 0      | 0      | 0      | 0      | 0      | 0      | 0      | 0      | 0      | 0      | 0      | 0      | 0      | 0      |
| Heliobacterium    | 2              | 51             | 0      | 0      | 0      | 0      | 0      | 0      | 0      | 0      | 0      | 1      | 0      | 0      | 0      | 0      | 0      | 1      | 0      | 0      |
| Herbaspirillum    | 2              | 172            | 0      | 0      | 0      | 0      | 1      | 1      | 0      | 0      | 0      | 0      | 0      | 1      | 1      | 0      | 0      | 1      | 1      | 0      |
| Herminiimonas     | 3              | 89             | 0      | 0      | 0      | 0      | 1      | 0      | 0      | 0      | 0      | 1      | 0      | 0      | 0      | 0      | 0      | 1      | 0      | 0      |
| Herpetosiphon     | 3              | 90             | 0      | 0      | 0      | 0      | 0      | 0      | 0      | 0      | 0      | 0      | 0      | 0      | 0      | 0      | 0      | 1      | 0      | 0      |
| Hippea            | 2              | 44             | 0      | 0      | 0      | 0      | 0      | 0      | 0      | 0      | 0      | 0      | 0      | 0      | 0      | 0      | 0      | 1      | 0      | 0      |
| Hirschia          | 2              | 102            | 0      | 0      | 0      | 0      | 0      | 0      | 0      | 0      | 1      | 1      | 0      | 0      | 0      | 0      | 0      | 1      | 1      | 0      |
| Histophilus       | 2              | 72             | 0      | 0      | 0      | 0      | 0      | 0      | 0      | 0      | 0      | 0      | 0      | 0      | 0      | 0      | 0      | 1      | 0      | 0      |
| Hoeflea           | 1              | 16             | 0      | 0      | 0      | 0      | 0      | 0      | 0      | 0      | 0      | 0      | 0      | 0      | 0      | 0      | 0      | 0      | 0      | 0      |
| Hydrogenivirga    | 1              | 2              | 0      | 0      | 0      | 0      | 0      | 0      | 0      | 0      | 0      | 0      | 0      | 0      | 0      | 0      | 0      | 0      | 0      | 0      |
| Hydrogenobacter   | 2              | 55             | 0      | 0      | 0      | 0      | 0      | 0      | 0      | 0      | 0      | 0      | 0      | 0      | 0      | 0      | 0      | 1      | 0      | 0      |
| Hydrogenobaculum  | 2              | 44             | 0      | 0      | 0      | 0      | 0      | 0      | 0      | 0      | 0      | 0      | 0      | 0      | 0      | 0      | 0      | 1      | 0      | 0      |
| Hydrogenophaga    | 1              | 9              | 0      | 0      | 0      | 0      | 0      | 0      | 0      | 0      | 0      | 0      | 0      | 0      | 0      | 0      | 0      | 1      | 0      | 0      |
| Hylemonella       | 1              | 4              | 0      | 0      | 0      | 0      | 0      | 0      | 0      | 0      | 0      | 0      | 0      | 0      | 0      | 0      | 0      | 1      | 0      | 0      |

| Genus                 | Cluster Number | Protein Counts | K01612 | K01615 | K01617 | K01666 | K01692 | K01721 | K01726 | K01781 | K01800 | K01821 | K01822 | K01856 | K01857 | K01860 | K01913 | K01951 | K02554 | K03268 |
|-----------------------|----------------|----------------|--------|--------|--------|--------|--------|--------|--------|--------|--------|--------|--------|--------|--------|--------|--------|--------|--------|--------|
| Hyperthermus          | 1              | 6              | 0      | 0      | 0      | 0      | 0      | 0      | 0      | 0      | 0      | 0      | 0      | 0      | 0      | 0      | 0      | 0      | 0      | 0      |
| Hyphomicrobium        | 2              | 93             | 0      | 0      | 0      | 0      | 1      | 0      | 0      | 0      | 0      | 1      | 0      | 0      | 0      | 0      | 0      | 1      | 0      | 0      |
| Hyphomonas            | 3              | 105            | 0      | 0      | 0      | 0      | 1      | 0      | 0      | 0      | 0      | 0      | 1      | 0      | 0      | 0      | 0      | 1      | 0      | 0      |
| Ideonella             | 1              | 18             | 0      | 0      | 0      | 1      | 0      | 0      | 0      | 0      | 0      | 0      | 0      | 0      | 0      | 0      | 0      | 0      | 0      | 0      |
| Idiomarina            | 2              | 86             | 0      | 0      | 0      | 0      | 0      | 0      | 0      | 0      | 1      | 0      | 0      | 0      | 0      | 0      | 0      | 1      | 0      | 0      |
| Ignavibacterium       | 1              | 14             | 0      | 0      | 0      | 0      | 0      | 0      | 0      | 0      | 0      | 0      | 0      | 0      | 0      | 0      | 0      | 1      | 0      | 0      |
| Ignicoccus            | 1              | 5              | 0      | 0      | 0      | 0      | 0      | 0      | 0      | 0      | 0      | 0      | 0      | 0      | 0      | 0      | 0      | 1      | 0      | 0      |
| Ignisphaera           | 1              | 8              | 0      | 0      | 0      | 0      | 0      | 0      | 0      | 0      | 0      | 1      | 0      | 0      | 0      | 0      | 0      | 1      | 0      | 0      |
| Ilyobacter            | 2              | 85             | 0      | 0      | 0      | 0      | 0      | 0      | 0      | 0      | 0      | 0      | 0      | 0      | 0      | 0      | 0      | 1      | 0      | 0      |
| Intrasporangium       | 2              | 114            | 0      | 0      | 1      | 1      | 1      | 0      | 0      | 0      | 0      | 1      | 0      | 0      | 0      | 0      | 0      | 1      | 0      | 0      |
| Isoptericola          | 1              | 18             | 0      | 0      | 0      | 0      | 0      | 0      | 0      | 0      | 0      | 0      | 0      | 0      | 1      | 0      | 0      | 1      | 0      | 0      |
| Isosphaera            | 2              | 75             | 0      | 0      | 0      | 0      | 0      | 0      | 0      | 0      | 0      | 0      | 0      | 0      | 0      | 0      | 0      | 1      | 0      | 0      |
| Jannaschia            | 3              | 151            | 0      | 0      | 0      | 0      | 1      | 0      | 0      | 0      | 1      | 0      | 0      | 1      | 0      | 0      | 0      | 1      | 0      | 0      |
| Janthinobacterium     | 2              | 99             | 0      | 0      | 0      | 0      | 1      | 0      | 0      | 1      | 0      | 1      | 0      | 0      | 0      | 0      | 0      | 1      | 0      | 0      |
| Jonesia               | 2              | 56             | 0      | 0      | 0      | 0      | 0      | 0      | 0      | 0      | 0      | 0      | 0      | 0      | 0      | 0      | 0      | 1      | 0      | 0      |
| Joostella             | 1              | 3              | 0      | 0      | 0      | 0      | 0      | 0      | 0      | 0      | 0      | 0      | 0      | 0      | 0      | 0      | 0      | 0      | 0      | 0      |
| Kaistia               | 1              | 2              | 0      | 0      | 0      | 0      | 0      | 0      | 0      | 0      | 0      | 0      | 0      | 0      | 0      | 0      | 0      | 0      | 0      | 0      |
| Kangiella             | 2              | 84             | 0      | 0      | 0      | 0      | 0      | 0      | 0      | 0      | 1      | 0      | 0      | 0      | 0      | 0      | 0      | 1      | 0      | 0      |
| Ketogulonicigenium    | 2              | 102            | 0      | 0      | 0      | 0      | 0      | 0      | 0      | 0      | 0      | 0      | 0      | 0      | 1      | 0      | 0      | 1      | 0      | 0      |
| Kineococcus           | 1              | 24             | 0      | 0      | 0      | 0      | 0      | 0      | 0      | 0      | 0      | 0      | 0      | 0      | 0      | 0      | 0      | 1      | 0      | 0      |
| Kinetoplastibacterium | 1              | 2              | 0      | 0      | 0      | 0      | 0      | 0      | 0      | 0      | 0      | 0      | 0      | 0      | 0      | 0      | 0      | 1      | 0      | 0      |
| Kingella              | 1              | 4              | 0      | 0      | 0      | 0      | 0      | 0      | 0      | 0      | 0      | 0      | 0      | 0      | 0      | 0      | 0      | 1      | 0      | 0      |
| Kitasatospora         | 1              | 36             | 0      | 0      | 0      | 1      | 1      | 0      | 0      | 0      | 0      | 0      | 0      | 0      | 1      | 0      | 0      | 1      | 1      | 0      |
| Klebsiella            | 3              | 222            | 0      | 0      | 0      | 1      | 1      | 1      | 0      | 0      | 0      | 1      | 0      | 1      | 1      | 0      | 0      | 1      | 1      | 0      |
| Kluyvera              | 1              | 1              | 0      | 0      | 0      | 0      | 0      | 0      | 0      | 0      | 0      | 0      | 0      | 0      | 0      | 0      | 0      | 0      | 0      | 0      |
| Kocuria               | 2              | 87             | 0      | 0      | 0      | 0      | 1      | 0      | 0      | 0      | 0      | 0      | 0      | 0      | 1      | 0      | 0      | 1      | 0      | 0      |
| Kordia                | 1              | 5              | 0      | 0      | 0      | 0      | 0      | 0      | 0      | 0      | 0      | 0      | 0      | 0      | 0      | 0      | 0      | 0      | 0      | 0      |
| Kosmotoga             | 2              | 61             | 0      | 0      | 0      | 0      | 0      | 0      | 0      | 0      | 0      | 0      | 0      | 0      | 0      | 0      | 0      | 1      | 0      | 0      |
| Kribbella             | 2              | 99             | 0      | 0      | 0      | 0      | 0      | 0      | 0      | 0      | 0      | 1      | 0      | 0      | 0      | 0      | 0      | 1      | 0      | 0      |
| Krokinobacter         | 2              | 90             | 0      | 0      | 0      | 0      | 0      | 0      | 0      | 0      | 0      | 0      | 0      | 0      | 0      | 0      | 0      | 1      | 0      | 0      |
| Kyrpidia              | 2              | 113            | 0      | 0      | 1      | 1      | 1      | 0      | 0      | 0      | 0      | 1      | 0      | 0      | 0      | 0      | 0      | 1      | 0      | 0      |
| Kytococcus            | 2              | 70             | 0      | 0      | 0      | 0      | 1      | 0      | 0      | 0      | 0      | 0      | 0      | 0      | 0      | 0      | 0      | 1      | 0      | 0      |
| Labrenzia             | 1              | 4              | 0      | 0      | 0      | 0      | 0      | 0      | 0      | 0      | 0      | 0      | 0      | 0      | 0      | 0      | 0      | 0      | 0      | 0      |
| Lachnoanaerobaculum   | 1              | 1              | 0      | 0      | 0      | 0      | 0      | 0      | 0      | 0      | 0      | 0      | 0      | 0      | 0      | 0      | 0      | 0      | 0      | 0      |
| Lachnospiraceae       | 1              | 51             | 0      | 0      | 0      | 0      | 0      | 0      | 0      | 0      | 0      | 0      | 0      | 0      | 0      | 0      | 0      | 0      | 0      | 0      |
| Lacinutrix            | 1              | 20             | 0      | 0      | 0      | 0      | 0      | 0      | 0      | 0      | 0      | 0      | 0      | 0      | 0      | 0      | 0      | 1      | 0      | 0      |
| Lactobacillus         | 2              | 119            | 0      | 0      | 0      | 0      | 0      | 0      | 0      | 0      | 0      | 1      | 0      | 0      | 1      | 0      | 0      | 1      | 0      | 0      |
| Lactococcus           | 2              | 82             | 0      | 0      | 0      | 0      | 0      | 0      | 0      | 0      | 0      | 1      | 0      | 0      | 0      | 0      | 0      | 1      | 0      | 0      |
| Lamprocystis          | 1              | 2              | 0      | 0      | 0      | 0      | 0      | 0      | 0      | 0      | 0      | 0      | 0      | 0      | 0      | 0      | 0      | 0      | 0      | 0      |
| Laribacter            | 2              | 80             | 0      | 0      | 0      | 0      | 0      | 0      | 0      | 0      | 0      | 1      | 0      | 0      | 0      | 0      | 0      | 1      | 0      | 0      |
| Lawsonia              | 2              | 33             | 0      | 0      | 0      | 0      | 0      | 0      | 0      | 0      | 0      | 0      | 0      | 0      | 0      | 0      | 0      | 1      | 0      | 0      |
| Leadbetterella        | 2              | 79             | 0      | 0      | 0      | 0      | 0      | 0      | 0      | 0      | 0      | 0      | 0      | 0      | 0      | 0      | 0      | 1      | 0      | 0      |
| Leeuwenhoekiiella     | 1              | 2              | 0      | 0      | 0      | 0      | 0      | 0      | 0      | 0      | 0      | 0      | 0      | 0      | 0      | 0      | 0      | 0      | 0      | 0      |
| Legionella            | 2              | 117            | 0      | 0      | 0      | 1      | 0      | 0      | 1      | 0      | 1      | 0      | 0      | 0      | 0      | 0      | 0      | 1      | 0      | 0      |
| Leifsonia             | 2              | 48             | 0      | 0      | 0      | 0      | 0      | 0      | 0      | 0      | 0      | 0      | 0      | 0      | 0      | 0      | 0      | 1      | 0      | 0      |
| Leptolyngbya          | 1              | 10             | 0      | 0      | 0      | 0      | 0      | 0      | 0      | 0      | 0      | 0      | 0      | 0      | 0      | 0      | 0      | 1      | 0      | 0      |
| Leptospira            | 2              | 76             | 0      | 0      | 0      | 0      | 1      | 0      | 0      | 0      | 0      | 1      | 0      | 0      | 0      | 0      | 0      | 1      | 0      | 0      |
| Leptospirillum        | 1              | 10             | 0      | 0      | 0      | 0      | 0      | 0      | 0      | 0      | 0      | 0      | 0      | 0      | 0      | 0      | 0      | 1      | 0      | 0      |
| Leptothrix            | 3              | 186            | 0      | 0      | 1      | 1      | 1      | 0      | 0      | 0      | 1      | 1      | 0      | 0      | 1      | 0      | 0      | 1      | 1      | 0      |
| Leptotrichia          | 2              | 43             | 0      | 0      | 0      | 0      | 0      | 0      | 0      | 0      | 0      | 0      | 0      | 0      | 0      | 0      | 0      | 1      | 0      | 0      |
| Leucobacter           | 1              | 2              | 0      | 0      | 0      | 0      | 0      | 0      | 0      | 0      | 0      | 0      | 0      | 0      | 0      | 0      | 0      | 0      | 0      | 0      |
| Leuconostoc           | 2              | 64             | 0      | 0      | 0      | 0      | 0      | 0      | 0      | 0      | 0      | 1      | 0      | 0      | 0      | 0      | 0      | 1      | 0      | 0      |

| Genus                | Cluster Number | Protein Counts | K01612 | K01615 | K01617 | K01666 | K01692 | K01721 | K01726 | K01781 | K01800 | K01821 | K01822 | K01856 | K01857 | K01860 | K01913 | K01951 | K02554 | K03268 |
|----------------------|----------------|----------------|--------|--------|--------|--------|--------|--------|--------|--------|--------|--------|--------|--------|--------|--------|--------|--------|--------|--------|
| Liberibacter         | 1              | 4              | 0      | 0      | 0      | 0      | 0      | 0      | 0      | 0      | 0      | 0      | 0      | 0      | 0      | 0      | 0      | 1      | 0      | 0      |
| Limnohabitans        | 1              | 11             | 0      | 0      | 0      | 0      | 0      | 0      | 0      | 0      | 0      | 0      | 0      | 0      | 0      | 0      | 0      | 1      | 0      | 0      |
| Listeria             | 2              | 77             | 0      | 0      | 0      | 0      | 0      | 0      | 0      | 0      | 0      | 1      | 0      | 0      | 0      | 0      | 0      | 1      | 0      | 0      |
| Listeriaceae         | 1              | 6              | 0      | 0      | 0      | 0      | 0      | 0      | 0      | 0      | 0      | 0      | 0      | 0      | 0      | 0      | 0      | 1      | 0      | 0      |
| Listonella           | 1              | 38             | 0      | 0      | 0      | 0      | 0      | 0      | 0      | 0      | 1      | 0      | 0      | 0      | 0      | 0      | 0      | 1      | 0      | 0      |
| Loktanella           | 1              | 3              | 0      | 0      | 0      | 0      | 0      | 0      | 0      | 0      | 0      | 0      | 0      | 0      | 0      | 0      | 0      | 0      | 0      | 0      |
| Lysinibacillus       | 2              | 97             | 0      | 0      | 0      | 0      | 0      | 0      | 0      | 0      | 0      | 1      | 0      | 0      | 0      | 0      | 0      | 1      | 0      | 0      |
| Macrococcus          | 2              | 60             | 0      | 0      | 0      | 0      | 0      | 0      | 0      | 0      | 0      | 0      | 0      | 0      | 0      | 0      | 0      | 1      | 0      | 0      |
| Magnetococcus        | 2              | 64             | 0      | 0      | 0      | 0      | 0      | 0      | 0      | 0      | 0      | 0      | 0      | 0      | 0      | 0      | 0      | 1      | 0      | 0      |
| Magnetospirillum     | 2              | 113            | 0      | 0      | 0      | 0      | 1      | 0      | 0      | 0      | 0      | 0      | 0      | 0      | 0      | 0      | 0      | 1      | 0      | 0      |
| Mahella              | 2              | 58             | 0      | 0      | 0      | 0      | 0      | 0      | 0      | 0      | 0      | 1      | 0      | 0      | 0      | 0      | 0      | 1      | 0      | 0      |
| Mannheimia           | 2              | 85             | 0      | 0      | 0      | 0      | 0      | 0      | 0      | 0      | 0      | 0      | 0      | 0      | 0      | 0      | 0      | 1      | 0      | 0      |
| Maribacter           | 3              | 87             | 0      | 0      | 0      | 0      | 0      | 0      | 0      | 0      | 0      | 0      | 0      | 0      | 0      | 0      | 0      | 1      | 0      | 0      |
| Maricaulis           | 3              | 87             | 0      | 0      | 0      | 0      | 1      | 0      | 0      | 0      | 0      | 0      | 0      | 0      | 0      | 0      | 0      | 1      | 1      | 0      |
| Marichromatium       | 1              | 2              | 0      | 0      | 0      | 0      | 0      | 0      | 0      | 0      | 0      | 0      | 0      | 0      | 0      | 0      | 0      | 0      | 0      | 0      |
| Marinithermus        | 2              | 77             | 0      | 0      | 0      | 0      | 1      | 0      | 0      | 0      | 0      | 0      | 0      | 0      | 0      | 0      | 0      | 1      | 0      | 0      |
| Marinitoga           | 1              | 15             | 0      | 0      | 0      | 0      | 0      | 0      | 0      | 0      | 0      | 0      | 0      | 0      | 0      | 0      | 0      | 1      | 0      | 0      |
| Marinobacter         | 2              | 163            | 0      | 0      | 1      | 1      | 1      | 0      | 0      | 0      | 0      | 1      | 0      | 1      | 1      | 0      | 0      | 1      | 1      | 0      |
| Marinomonas          | 3              | 192            | 0      | 0      | 0      | 1      | 1      | 0      | 0      | 0      | 1      | 1      | 0      | 1      | 0      | 0      | 0      | 1      | 0      | 0      |
| Maritimibacter       | 1              | 7              | 0      | 0      | 0      | 0      | 0      | 0      | 0      | 0      | 0      | 0      | 0      | 0      | 0      | 0      | 0      | 0      | 0      | 0      |
| Marivirga            | 2              | 96             | 0      | 0      | 0      | 0      | 1      | 0      | 0      | 0      | 0      | 0      | 0      | 0      | 0      | 0      | 0      | 1      | 0      | 0      |
| Martella             | 1              | 3              | 0      | 0      | 0      | 0      | 0      | 0      | 0      | 0      | 0      | 0      | 0      | 0      | 0      | 0      | 0      | 0      | 0      | 0      |
| Marvinbryantia       | 1              | 1              | 0      | 0      | 0      | 0      | 0      | 0      | 0      | 0      | 0      | 0      | 0      | 0      | 0      | 0      | 0      | 0      | 0      | 0      |
| Massilia             | 1              | 4              | 0      | 0      | 0      | 1      | 0      | 0      | 0      | 0      | 0      | 0      | 0      | 0      | 0      | 0      | 0      | 0      | 0      | 0      |
| Mastigocladopsis     | 1              | 16             | 0      | 0      | 0      | 0      | 0      | 0      | 0      | 0      | 0      | 0      | 0      | 0      | 0      | 0      | 0      | 0      | 0      | 0      |
| Megamonas            | 1              | 47             | 0      | 0      | 0      | 0      | 0      | 0      | 0      | 0      | 0      | 0      | 0      | 0      | 0      | 0      | 0      | 1      | 0      | 0      |
| Megasphaera          | 1              | 14             | 0      | 0      | 0      | 0      | 0      | 0      | 0      | 0      | 0      | 0      | 0      | 0      | 0      | 0      | 0      | 0      | 0      | 0      |
| Meiothermus          | 2              | 110            | 0      | 0      | 0      | 0      | 1      | 0      | 0      | 0      | 0      | 0      | 0      | 0      | 1      | 0      | 0      | 1      | 0      | 0      |
| Melissococcus        | 2              | 46             | 0      | 0      | 0      | 0      | 0      | 0      | 0      | 0      | 0      | 0      | 0      | 0      | 0      | 0      | 0      | 1      | 0      | 0      |
| Mesoflavibacter      | 1              | 6              | 0      | 0      | 0      | 0      | 0      | 0      | 0      | 0      | 0      | 0      | 0      | 0      | 0      | 0      | 0      | 0      | 0      | 0      |
| Mesoplasma           | 1              | 23             | 0      | 0      | 0      | 0      | 0      | 0      | 0      | 0      | 0      | 0      | 0      | 0      | 0      | 0      | 0      | 1      | 0      | 0      |
| Mesorhizobium        | 2              | 201            | 0      | 0      | 0      | 0      | 1      | 1      | 0      | 0      | 0      | 1      | 1      | 0      | 1      | 0      | 0      | 1      | 0      | 0      |
| Mesotoga             | 1              | 14             | 0      | 0      | 0      | 0      | 0      | 0      | 0      | 0      | 0      | 0      | 0      | 0      | 0      | 0      | 0      | 1      | 0      | 0      |
| Metallosphaera       | 1              | 18             | 0      | 0      | 0      | 0      | 0      | 0      | 0      | 0      | 0      | 0      | 0      | 0      | 0      | 0      | 0      | 1      | 0      | 0      |
| Methanobacterium     | 1              | 7              | 0      | 0      | 0      | 0      | 0      | 0      | 0      | 0      | 0      | 1      | 0      | 0      | 0      | 0      | 0      | 1      | 0      | 0      |
| Methanobrevibacter   | 1              | 9              | 0      | 0      | 0      | 0      | 0      | 0      | 0      | 0      | 0      | 1      | 0      | 0      | 0      | 0      | 0      | 1      | 0      | 0      |
| Methanocaldococcus   | 1              | 6              | 0      | 0      | 0      | 0      | 0      | 0      | 0      | 0      | 0      | 1      | 0      | 0      | 0      | 0      | 0      | 1      | 0      | 0      |
| Methanocella         | 1              | 15             | 1      | 0      | 0      | 0      | 0      | 0      | 0      | 0      | 0      | 1      | 0      | 0      | 0      | 0      | 0      | 1      | 0      | 0      |
| Methanococcaceae     | 1              | 1              | 0      | 0      | 0      | 0      | 0      | 0      | 0      | 0      | 0      | 0      | 0      | 0      | 0      | 0      | 0      | 0      | 0      | 0      |
| Methanococcoides     | 1              | 5              | 0      | 0      | 0      | 0      | 0      | 0      | 0      | 0      | 0      | 0      | 0      | 0      | 0      | 0      | 0      | 1      | 0      | 0      |
| Methanococcus        | 1              | 9              | 0      | 0      | 0      | 0      | 0      | 0      | 0      | 0      | 0      | 1      | 0      | 0      | 0      | 0      | 0      | 1      | 0      | 0      |
| Methanocorpusculum   | 1              | 7              | 0      | 0      | 0      | 1      | 0      | 0      | 0      | 0      | 0      | 0      | 0      | 0      | 0      | 0      | 0      | 1      | 0      | 0      |
| Methanoculleus       | 1              | 8              | 0      | 0      | 0      | 0      | 0      | 0      | 0      | 0      | 0      | 1      | 0      | 0      | 0      | 0      | 0      | 1      | 0      | 0      |
| Methanohalobium      | 1              | 5              | 0      | 0      | 0      | 0      | 0      | 0      | 0      | 0      | 0      | 0      | 0      | 0      | 0      | 0      | 0      | 1      | 0      | 0      |
| Methanohalophilus    | 1              | 5              | 0      | 0      | 0      | 0      | 0      | 0      | 0      | 0      | 0      | 0      | 0      | 0      | 0      | 0      | 0      | 1      | 0      | 0      |
| Methanolobus         | 1              | 5              | 0      | 0      | 0      | 0      | 0      | 0      | 0      | 0      | 0      | 0      | 0      | 0      | 0      | 0      | 0      | 1      | 0      | 0      |
| Methanomethylovorans | 1              | 5              | 0      | 0      | 0      | 0      | 0      | 0      | 0      | 0      | 0      | 0      | 0      | 0      | 0      | 0      | 0      | 1      | 0      | 0      |
| Methanoplanus        | 1              | 7              | 0      | 0      | 0      | 0      | 0      | 0      | 0      | 0      | 0      | 0      | 0      | 0      | 0      | 0      | 0      | 1      | 0      | 0      |
| Methanopyrus         | 1              | 4              | 0      | 0      | 0      | 0      | 0      | 0      | 0      | 0      | 0      | 0      | 0      | 0      | 0      | 0      | 0      | 1      | 0      | 0      |
| Methanoregula        | 1              | 8              | 0      | 0      | 0      | 0      | 0      | 0      | 0      | 0      | 0      | 1      | 0      | 0      | 0      | 0      | 0      | 1      | 0      | 0      |
| Methanosaeta         | 1              | 9              | 0      | 0      | 0      | 0      | 0      | 0      | 0      | 0      | 0      | 0      | 0      | 0      | 0      | 0      | 0      | 1      | 0      | 0      |
| Methanosalsum        | 1              | 7              | 0      | 0      | 0      | 0      | 0      | 0      | 0      | 0      | 0      | 0      | 0      | 0      | 0      | 0      | 0      | 1      | 0      | 0      |

| Genus               | Cluster Number | Protein Counts | K01612 | K01615 | K01617 | K01666 | K01692 | K01721 | K01726 | K01781 | K01800 | K01821 | K01822 | K01856 | K01857 | K01860 | K01913 | K01951 | K02554 | K03268 |
|---------------------|----------------|----------------|--------|--------|--------|--------|--------|--------|--------|--------|--------|--------|--------|--------|--------|--------|--------|--------|--------|--------|
| Methanosarcina      | 1              | 18             | 1      | 0      | 0      | 0      | 0      | 0      | 0      | 0      | 0      | 0      | 0      | 0      | 0      | 0      | 0      | 1      | 0      | 0      |
| Methanosphaera      | 1              | 7              | 0      | 0      | 0      | 0      | 0      | 0      | 0      | 0      | 0      | 1      | 0      | 0      | 0      | 0      | 0      | 1      | 0      | 0      |
| Methanosphaerula    | 1              | 8              | 0      | 0      | 0      | 0      | 0      | 0      | 0      | 0      | 0      | 1      | 0      | 0      | 0      | 0      | 0      | 1      | 0      | 0      |
| Methanospirillum    | 1              | 6              | 0      | 0      | 0      | 0      | 0      | 0      | 0      | 0      | 0      | 0      | 0      | 0      | 0      | 0      | 0      | 1      | 0      | 0      |
| Methanothermobacter | 1              | 6              | 0      | 0      | 0      | 0      | 0      | 0      | 0      | 0      | 0      | 1      | 0      | 0      | 0      | 0      | 0      | 1      | 0      | 0      |
| Methanothermococcus | 1              | 5              | 0      | 0      | 0      | 0      | 0      | 0      | 0      | 0      | 0      | 0      | 0      | 0      | 0      | 0      | 0      | 1      | 0      | 0      |
| Methanothermus      | 1              | 5              | 0      | 0      | 0      | 0      | 0      | 0      | 0      | 0      | 0      | 0      | 0      | 0      | 0      | 0      | 0      | 1      | 0      | 0      |
| Methanotorris       | 1              | 5              | 0      | 0      | 0      | 0      | 0      | 0      | 0      | 0      | 0      | 0      | 0      | 0      | 0      | 0      | 0      | 1      | 0      | 0      |
| Methylacidiphilum   | 2              | 48             | 0      | 0      | 0      | 0      | 0      | 0      | 0      | 0      | 0      | 0      | 0      | 0      | 0      | 0      | 0      | 1      | 0      | 0      |
| Methylarcula        | 1              | 2              | 0      | 0      | 0      | 0      | 0      | 0      | 0      | 0      | 0      | 0      | 0      | 0      | 0      | 0      | 0      | 0      | 0      | 0      |
| Methylibium         | 1              | 38             | 0      | 0      | 1      | 1      | 1      | 0      | 0      | 0      | 0      | 1      | 0      | 0      | 0      | 0      | 0      | 1      | 1      | 0      |
| Methylobacillus     | 2              | 61             | 0      | 0      | 0      | 0      | 0      | 0      | 0      | 0      | 0      | 1      | 0      | 0      | 0      | 0      | 0      | 1      | 0      | 0      |
| Methylobacterium    | 3              | 236            | 0      | 0      | 1      | 0      | 1      | 1      | 0      | 0      | 1      | 1      | 0      | 1      | 1      | 0      | 0      | 1      | 0      | 0      |
| Methylocella        | 3              | 117            | 0      | 0      | 1      | 1      | 1      | 1      | 0      | 0      | 0      | 1      | 0      | 0      | 0      | 0      | 0      | 1      | 0      | 0      |
| Methylococcus       | 2              | 80             | 0      | 0      | 0      | 0      | 0      | 0      | 0      | 0      | 0      | 0      | 0      | 0      | 0      | 0      | 0      | 1      | 0      | 0      |
| Methylocystis       | 1              | 21             | 0      | 0      | 0      | 0      | 1      | 0      | 0      | 0      | 0      | 0      | 0      | 0      | 0      | 0      | 0      | 1      | 0      | 0      |
| Methyloferula       | 1              | 2              | 0      | 0      | 0      | 0      | 0      | 0      | 0      | 0      | 0      | 0      | 0      | 0      | 0      | 0      | 0      | 0      | 0      | 0      |
| Methylomicrobium    | 1              | 12             | 0      | 0      | 0      | 0      | 0      | 0      | 0      | 0      | 0      | 0      | 0      | 0      | 0      | 0      | 0      | 1      | 0      | 0      |
| Methylomonas        | 1              | 15             | 0      | 0      | 0      | 0      | 0      | 0      | 0      | 0      | 0      | 1      | 0      | 0      | 0      | 0      | 0      | 1      | 0      | 0      |
| Methylophaga        | 1              | 7              | 0      | 0      | 0      | 1      | 0      | 0      | 0      | 0      | 0      | 0      | 0      | 0      | 0      | 0      | 0      | 1      | 0      | 0      |
| Methylophilus       | 1              | 2              | 0      | 0      | 0      | 0      | 0      | 0      | 0      | 0      | 0      | 0      | 0      | 0      | 0      | 0      | 0      | 0      | 0      | 0      |
| Methylosinus        | 1              | 2              | 0      | 0      | 0      | 0      | 0      | 0      | 0      | 0      | 0      | 0      | 0      | 0      | 0      | 0      | 0      | 0      | 0      | 0      |
| Methylotenera       | 2              | 72             | 0      | 0      | 0      | 0      | 0      | 0      | 0      | 0      | 0      | 1      | 0      | 0      | 0      | 0      | 0      | 1      | 0      | 0      |
| Methyloversatilis   | 1              | 5              | 0      | 0      | 0      | 0      | 0      | 0      | 0      | 0      | 0      | 0      | 0      | 0      | 0      | 0      | 0      | 0      | 0      | 0      |
| Methylovorus        | 2              | 66             | 0      | 0      | 0      | 0      | 0      | 0      | 0      | 0      | 0      | 1      | 0      | 0      | 0      | 0      | 0      | 1      | 0      | 0      |
| Micavibrio          | 1              | 9              | 0      | 0      | 0      | 0      | 1      | 0      | 0      | 0      | 0      | 1      | 0      | 0      | 0      | 0      | 0      | 1      | 0      | 0      |
| Microbacterium      | 2              | 115            | 0      | 0      | 0      | 0      | 1      | 1      | 0      | 0      | 0      | 0      | 0      | 0      | 1      | 0      | 0      | 1      | 0      | 0      |
| Microchaete         | 1              | 23             | 0      | 0      | 0      | 0      | 0      | 0      | 0      | 0      | 0      | 0      | 0      | 0      | 0      | 0      | 0      | 1      | 0      | 0      |
| Micrococcus         | 2              | 72             | 0      | 0      | 0      | 0      | 1      | 0      | 0      | 0      | 0      | 0      | 0      | 0      | 0      | 0      | 0      | 1      | 0      | 0      |
| Microcoleus         | 1              | 17             | 0      | 0      | 0      | 0      | 0      | 0      | 0      | 0      | 0      | 0      | 0      | 0      | 0      | 0      | 0      | 1      | 0      | 0      |
| Microcystis         | 2              | 67             | 0      | 0      | 0      | 0      | 0      | 0      | 0      | 0      | 0      | 0      | 0      | 0      | 0      | 0      | 0      | 1      | 0      | 0      |
| Microlunatus        | 1              | 25             | 0      | 0      | 0      | 0      | 0      | 0      | 0      | 0      | 0      | 0      | 0      | 1      | 0      | 0      | 0      | 1      | 0      | 0      |
| Micromonospora      | 2              | 115            | 0      | 0      | 1      | 1      | 1      | 0      | 0      | 0      | 0      | 0      | 0      | 0      | 0      | 0      | 0      | 1      | 0      | 0      |
| Microvirga          | 1              | 6              | 0      | 0      | 0      | 0      | 0      | 0      | 0      | 0      | 0      | 0      | 0      | 0      | 0      | 0      | 0      | 0      | 0      | 0      |
| Mobiluncus          | 1              | 41             | 0      | 0      | 0      | 0      | 0      | 0      | 0      | 0      | 0      | 0      | 0      | 0      | 0      | 0      | 0      | 1      | 0      | 0      |
| Modestobacter       | 1              | 43             | 0      | 0      | 0      | 0      | 1      | 1      | 0      | 0      | 0      | 0      | 0      | 0      | 1      | 0      | 0      | 1      | 0      | 0      |
| Moorea              | 1              | 2              | 0      | 0      | 0      | 0      | 0      | 0      | 0      | 0      | 0      | 0      | 0      | 0      | 0      | 0      | 0      | 0      | 0      | 0      |
| Moorella            | 2              | 69             | 0      | 0      | 1      | 1      | 0      | 0      | 0      | 0      | 0      | 0      | 0      | 0      | 0      | 0      | 0      | 1      | 0      | 0      |
| Moraxella           | 2              | 66             | 0      | 0      | 0      | 0      | 0      | 0      | 0      | 0      | 1      | 0      | 0      | 0      | 0      | 0      | 0      | 1      | 0      | 0      |
| Morganella          | 1              | 29             | 0      | 0      | 0      | 0      | 0      | 0      | 0      | 0      | 0      | 1      | 0      | 0      | 0      | 0      | 0      | 1      | 0      | 0      |
| Moritella           | 1              | 2              | 0      | 0      | 0      | 0      | 0      | 0      | 0      | 0      | 0      | 0      | 0      | 0      | 0      | 0      | 0      | 1      | 0      | 0      |
| Muricauda           | 1              | 23             | 0      | 0      | 0      | 0      | 0      | 0      | 0      | 0      | 0      | 0      | 0      | 0      | 0      | 0      | 0      | 1      | 0      | 0      |
| Mycobacterium       | 3              | 306            | 0      | 0      | 1      | 1      | 1      | 1      | 0      | 0      | 0      | 1      | 1      | 1      | 1      | 0      | 1      | 1      | 1      | 0      |
| Mycoplasma          | 1              | 53             | 0      | 0      | 0      | 0      | 0      | 0      | 0      | 0      | 0      | 0      | 0      | 0      | 0      | 0      | 0      | 1      | 0      | 0      |
| Myxococcus          | 2              | 110            | 0      | 0      | 1      | 0      | 1      | 0      | 0      | 0      | 0      | 0      | 0      | 0      | 0      | 0      | 0      | 1      | 0      | 0      |
| Nakamurella         | 2              | 115            | 0      | 0      | 1      | 1      | 1      | 0      | 0      | 0      | 0      | 0      | 0      | 0      | 0      | 0      | 0      | 1      | 0      | 0      |
| napthalene          | 1              | 2              | 0      | 0      | 0      | 0      | 0      | 0      | 0      | 0      | 0      | 0      | 0      | 0      | 0      | 0      | 0      | 0      | 0      | 0      |
| Natranaerobius      | 2              | 55             | 0      | 0      | 0      | 0      | 0      | 0      | 0      | 0      | 0      | 0      | 0      | 0      | 0      | 0      | 0      | 1      | 0      | 0      |
| Natrialba           | 1              | 16             | 0      | 0      | 0      | 0      | 0      | 0      | 0      | 0      | 0      | 0      | 0      | 0      | 0      | 0      | 0      | 1      | 0      | 0      |
| Natrinema           | 1              | 16             | 0      | 0      | 0      | 0      | 0      | 0      | 0      | 0      | 0      | 0      | 0      | 0      | 0      | 0      | 0      | 1      | 0      | 0      |
| Natronobacterium    | 1              | 11             | 0      | 0      | 0      | 0      | 0      | 0      | 0      | 0      | 0      | 0      | 0      | 0      | 0      | 0      | 0      | 1      | 0      | 0      |
| Natronococcus       | 1              | 21             | 0      | 0      | 0      | 0      | 0      | 0      | 0      | 0      | 0      | 0      | 0      | 0      | 0      | 0      | 0      | 1      | 0      | 0      |

| Genus             | Cluster Number | Protein Counts | K01612 | K01615 | K01617 | K01666 | K01692 | K01721 | K01726 | K01781 | K01800 | K01821 | K01822 | K01856 | K01857 | K01860 | K01913 | K01951 | K02554 | K03268 |
|-------------------|----------------|----------------|--------|--------|--------|--------|--------|--------|--------|--------|--------|--------|--------|--------|--------|--------|--------|--------|--------|--------|
| Natronomonas      | 1              | 20             | 0      | 0      | 0      | 0      | 0      | 0      | 0      | 0      | 0      | 0      | 0      | 0      | 0      | 0      | 0      | 1      | 0      | 0      |
| Nautilia          | 2              | 48             | 0      | 0      | 0      | 0      | 0      | 0      | 0      | 0      | 0      | 0      | 0      | 0      | 0      | 0      | 0      | 1      | 0      | 0      |
| Neisseria         | 2              | 67             | 0      | 0      | 0      | 0      | 0      | 0      | 0      | 0      | 0      | 1      | 0      | 0      | 0      | 0      | 0      | 1      | 0      | 0      |
| Neisseriaceae     | 1              | 1              | 0      | 0      | 0      | 0      | 0      | 0      | 0      | 0      | 0      | 0      | 0      | 0      | 0      | 0      | 0      | 0      | 0      | 0      |
| Neorickettsia     | 1              | 31             | 0      | 0      | 0      | 0      | 0      | 0      | 0      | 0      | 0      | 0      | 0      | 0      | 0      | 0      | 0      | 1      | 0      | 0      |
| Neptuniibacter    | 1              | 2              | 0      | 0      | 0      | 0      | 0      | 0      | 0      | 0      | 0      | 0      | 0      | 0      | 0      | 0      | 0      | 0      | 0      | 0      |
| Niastella         | 1              | 21             | 0      | 0      | 0      | 0      | 0      | 0      | 0      | 0      | 0      | 1      | 0      | 0      | 0      | 0      | 0      | 1      | 0      | 0      |
| Nitratifractor    | 2              | 54             | 0      | 0      | 0      | 0      | 0      | 0      | 0      | 0      | 0      | 0      | 0      | 0      | 0      | 0      | 0      | 1      | 0      | 0      |
| Nitratireductor   | 1              | 19             | 0      | 0      | 0      | 0      | 0      | 0      | 0      | 0      | 0      | 0      | 0      | 0      | 0      | 0      | 0      | 1      | 0      | 0      |
| Nitratiruptor     | 2              | 40             | 0      | 0      | 0      | 0      | 0      | 0      | 0      | 0      | 0      | 0      | 0      | 0      | 0      | 0      | 0      | 1      | 0      | 0      |
| Nitrobacter       | 2              | 99             | 0      | 0      | 0      | 0      | 1      | 0      | 0      | 0      | 0      | 0      | 0      | 0      | 0      | 0      | 0      | 1      | 0      | 0      |
| Nitrococcus       | 1              | 2              | 0      | 0      | 0      | 0      | 0      | 0      | 0      | 0      | 0      | 0      | 0      | 0      | 0      | 0      | 0      | 0      | 0      | 0      |
| Nitrosococcus     | 2              | 94             | 0      | 0      | 0      | 0      | 0      | 0      | 0      | 0      | 1      | 0      | 0      | 0      | 0      | 0      | 0      | 1      | 0      | 0      |
| Nitrosomonas      | 2              | 72             | 0      | 0      | 0      | 0      | 0      | 0      | 0      | 0      | 0      | 1      | 0      | 0      | 0      | 0      | 0      | 1      | 0      | 0      |
| Nitrosopumilaceae | 1              | 7              | 0      | 0      | 0      | 0      | 0      | 0      | 0      | 0      | 0      | 1      | 0      | 0      | 0      | 0      | 0      | 1      | 0      | 0      |
| Nitrosopumilus    | 1              | 11             | 0      | 0      | 0      | 1      | 0      | 0      | 0      | 0      | 0      | 1      | 0      | 0      | 0      | 0      | 0      | 1      | 0      | 0      |
| Nitrospira        | 2              | 74             | 0      | 0      | 0      | 0      | 0      | 0      | 0      | 0      | 0      | 1      | 0      | 0      | 0      | 0      | 0      | 1      | 0      | 0      |
| Nocardia          | 2              | 185            | 0      | 0      | 1      | 1      | 1      | 0      | 0      | 0      | 0      | 1      | 1      | 0      | 1      | 0      | 1      | 1      | 1      | 0      |
| Nocardioidaceae   | 1              | 2              | 0      | 0      | 0      | 0      | 0      | 0      | 0      | 0      | 0      | 0      | 0      | 0      | 0      | 0      | 0      | 0      | 0      | 0      |
| Nocardioides      | 2              | 157            | 0      | 0      | 1      | 1      | 1      | 0      | 0      | 0      | 0      | 0      | 1      | 0      | 0      | 0      | 0      | 1      | 0      | 0      |
| Nocardiopsis      | 2              | 102            | 0      | 0      | 0      | 1      | 1      | 0      | 0      | 0      | 0      | 1      | 0      | 0      | 0      | 0      | 0      | 1      | 0      | 0      |
| Nodularia         | 1              | 22             | 0      | 0      | 0      | 0      | 0      | 0      | 0      | 0      | 0      | 0      | 0      | 0      | 0      | 0      | 0      | 1      | 0      | 0      |
| Nonlabens         | 1              | 19             | 0      | 0      | 0      | 1      | 0      | 0      | 0      | 0      | 0      | 0      | 0      | 0      | 0      | 0      | 0      | 1      | 0      | 0      |
| Nostoc            | 2              | 111            | 0      | 0      | 0      | 0      | 0      | 0      | 0      | 0      | 0      | 1      | 0      | 0      | 0      | 0      | 0      | 1      | 0      | 0      |
| Nostocaceae       | 1              | 2              | 0      | 0      | 0      | 0      | 0      | 0      | 0      | 0      | 0      | 0      | 0      | 0      | 0      | 0      | 0      | 0      | 0      | 0      |
| Novosphingobium   | 2              | 169            | 0      | 0      | 0      | 1      | 1      | 0      | 0      | 0      | 1      | 1      | 1      | 1      | 0      | 0      | 0      | 1      | 1      | 0      |
| Oceanibaculum     | 1              | 3              | 0      | 0      | 0      | 0      | 0      | 0      | 0      | 0      | 0      | 0      | 0      | 0      | 0      | 0      | 0      | 0      | 0      | 0      |
| Oceanibulbus      | 1              | 12             | 0      | 0      | 0      | 0      | 0      | 0      | 0      | 0      | 0      | 0      | 0      | 0      | 0      | 0      | 0      | 0      | 0      | 0      |
| Oceanicola        | 1              | 9              | 0      | 0      | 0      | 0      | 0      | 0      | 0      | 0      | 0      | 0      | 0      | 0      | 0      | 0      | 0      | 0      | 0      | 0      |
| Oceanimonas       | 1              | 33             | 0      | 0      | 0      | 0      | 0      | 0      | 0      | 0      | 0      | 1      | 0      | 1      | 1      | 0      | 0      | 1      | 0      | 0      |
| Oceaniovalibus    | 1              | 2              | 0      | 0      | 0      | 0      | 0      | 0      | 0      | 0      | 0      | 0      | 0      | 0      | 0      | 0      | 0      | 0      | 0      | 0      |
| Oceanithermus     | 2              | 72             | 0      | 0      | 0      | 0      | 0      | 0      | 0      | 0      | 0      | 0      | 0      | 0      | 0      | 0      | 0      | 1      | 0      | 0      |
| Oceanobacillus    | 2              | 91             | 0      | 0      | 0      | 0      | 0      | 0      | 0      | 0      | 0      | 0      | 1      | 0      | 0      | 0      | 0      | 1      | 0      | 0      |
| Oceanospirillum   | 1              | 2              | 0      | 0      | 0      | 0      | 0      | 0      | 0      | 0      | 0      | 0      | 0      | 0      | 0      | 0      | 0      | 0      | 0      | 0      |
| Ochrobactrum      | 2              | 133            | 0      | 0      | 0      | 0      | 1      | 0      | 0      | 0      | 0      | 1      | 0      | 0      | 1      | 0      | 0      | 1      | 0      | 0      |
| Octadecabacter    | 1              | 29             | 0      | 0      | 0      | 1      | 0      | 1      | 0      | 0      | 0      | 0      | 0      | 0      | 0      | 0      | 0      | 1      | 0      | 0      |
| Oenococcus        | 2              | 41             | 0      | 0      | 0      | 0      | 0      | 0      | 0      | 0      | 0      | 1      | 0      | 0      | 0      | 0      | 0      | 1      | 0      | 0      |
| Oleomonas         | 1              | 2              | 0      | 0      | 0      | 0      | 0      | 0      | 0      | 0      | 0      | 0      | 0      | 0      | 0      | 0      | 0      | 0      | 0      | 0      |
| Oligotropha       | 3              | 87             | 0      | 0      | 0      | 0      | 0      | 0      | 0      | 0      | 0      | 1      | 0      | 0      | 0      | 0      | 0      | 1      | 1      | 0      |
| Olsenella         | 2              | 40             | 0      | 0      | 0      | 0      | 0      | 0      | 0      | 0      | 0      | 0      | 0      | 0      | 0      | 0      | 0      | 1      | 0      | 0      |
| Opitutus          | 2              | 67             | 0      | 0      | 0      | 0      | 0      | 0      | 0      | 0      | 0      | 0      | 0      | 0      | 0      | 0      | 0      | 1      | 0      | 0      |
| Orientia          | 1              | 21             | 0      | 0      | 0      | 0      | 0      | 0      | 0      | 0      | 0      | 0      | 0      | 0      | 0      | 0      | 0      | 0      | 0      | 0      |
| Ornithobacterium  | 1              | 11             | 0      | 0      | 0      | 0      | 0      | 0      | 0      | 0      | 0      | 0      | 0      | 0      | 0      | 0      | 0      | 1      | 0      | 0      |
| Oscillatoria      | 1              | 16             | 0      | 0      | 0      | 0      | 0      | 0      | 0      | 0      | 0      | 0      | 0      | 0      | 0      | 0      | 0      | 1      | 0      | 0      |
| Oscillatoriales   | 1              | 2              | 0      | 0      | 0      | 0      | 0      | 0      | 0      | 0      | 0      | 0      | 0      | 0      | 0      | 0      | 0      | 0      | 0      | 0      |
| Oscillibacter     | 1              | 20             | 0      | 0      | 0      | 0      | 0      | 0      | 0      | 0      | 0      | 0      | 0      | 0      | 0      | 0      | 0      | 1      | 0      | 0      |
| Owenweeksia       | 1              | 15             | 0      | 0      | 0      | 0      | 0      | 0      | 0      | 0      | 0      | 0      | 0      | 0      | 0      | 0      | 0      | 1      | 0      | 0      |
| Oxalobacteraceae  | 1              | 4              | 0      | 0      | 0      | 0      | 0      | 0      | 0      | 0      | 0      | 0      | 0      | 0      | 0      | 0      | 0      | 0      | 0      | 0      |
| Paenibacillus     | 2              | 152            | 0      | 0      | 0      | 1      | 0      | 1      | 0      | 0      | 0      | 1      | 0      | 1      | 0      | 0      | 0      | 1      | 0      | 0      |
| Paludibacter      | 2              | 67             | 0      | 0      | 0      | 1      | 0      | 0      | 0      | 0      | 0      | 0      | 0      | 0      | 0      | 0      | 0      | 1      | 0      | 0      |
| Pandoraea         | 1              | 18             | 0      | 0      | 0      | 1      | 0      | 0      | 0      | 0      | 0      | 0      | 0      | 0      | 0      | 1      | 0      | 0      | 0      | 1      |
| Pannonibacter     | 1              | 3              | 0      | 0      | 0      | 0      | 0      | 0      | 0      | 0      | 0      | 0      | 0      | 0      | 0      | 0      | 0      | 0      | 0      | 0      |

| Genus              | Cluster Number | Protein Counts | K01612 | K01615 | K01617 | K01666 | K01692 | K01721 | K01726 | K01781 | K01800 | K01821 | K01822 | K01856 | K01857 | K01860 | K01913 | K01951 | K02554 | K03268 |
|--------------------|----------------|----------------|--------|--------|--------|--------|--------|--------|--------|--------|--------|--------|--------|--------|--------|--------|--------|--------|--------|--------|
| Pantholops         | 1              | 23             | 0      | 0      | 0      | 0      | 0      | 0      | 0      | 0      | 0      | 0      | 0      | 0      | 0      | 0      | 0      | 0      | 0      | 0      |
| Pantoea            | 2              | 181            | 0      | 0      | 0      | 0      | 0      | 1      | 0      | 0      | 0      | 1      | 0      | 0      | 1      | 0      | 0      | 1      | 0      | 0      |
| Parabacteroides    | 2              | 64             | 0      | 0      | 0      | 0      | 0      | 0      | 0      | 0      | 0      | 0      | 0      | 0      | 0      | 0      | 0      | 1      | 0      | 0      |
| Parachlamydia      | 1              | 11             | 0      | 0      | 0      | 0      | 0      | 0      | 0      | 0      | 0      | 0      | 0      | 0      | 0      | 0      | 0      | 1      | 0      | 0      |
| Paracoccus         | 2              | 169            | 0      | 0      | 0      | 0      | 0      | 0      | 0      | 0      | 1      | 1      | 0      | 1      | 0      | 0      | 0      | 1      | 0      | 0      |
| Parvibaculum       | 3              | 117            | 0      | 0      | 0      | 0      | 1      | 0      | 0      | 0      | 0      | 0      | 0      | 0      | 0      | 0      | 0      | 1      | 0      | 0      |
| Parvularcula       | 2              | 72             | 0      | 0      | 0      | 0      | 1      | 0      | 0      | 0      | 0      | 0      | 0      | 0      | 0      | 0      | 0      | 1      | 0      | 0      |
| Pasteurella        | 2              | 85             | 0      | 0      | 0      | 0      | 0      | 0      | 0      | 0      | 0      | 0      | 0      | 0      | 0      | 0      | 0      | 1      | 0      | 0      |
| Pasteurellaceae    | 1              | 2              | 0      | 0      | 0      | 0      | 0      | 0      | 0      | 0      | 0      | 0      | 0      | 0      | 0      | 0      | 0      | 0      | 0      | 0      |
| Pectobacterium     | 1              | 44             | 0      | 0      | 0      | 1      | 0      | 0      | 0      | 0      | 0      | 1      | 0      | 0      | 1      | 0      | 0      | 1      | 0      | 0      |
| Pediococcus        | 1              | 43             | 0      | 0      | 0      | 0      | 0      | 0      | 0      | 0      | 0      | 1      | 0      | 0      | 0      | 0      | 0      | 1      | 0      | 0      |
| Pedobacter         | 2              | 88             | 0      | 0      | 0      | 0      | 0      | 0      | 0      | 0      | 0      | 0      | 0      | 0      | 0      | 0      | 0      | 1      | 0      | 0      |
| Pelagibaca         | 1              | 10             | 0      | 0      | 0      | 0      | 0      | 0      | 0      | 0      | 0      | 0      | 0      | 0      | 0      | 0      | 0      | 0      | 0      | 0      |
| Pelagibacterium    | 1              | 39             | 0      | 0      | 0      | 0      | 1      | 0      | 0      | 0      | 0      | 0      | 0      | 0      | 1      | 0      | 0      | 1      | 0      | 0      |
| Pelobacter         | 2              | 85             | 0      | 0      | 0      | 0      | 0      | 0      | 0      | 0      | 0      | 1      | 0      | 0      | 0      | 0      | 0      | 1      | 0      | 0      |
| Pelodictyon        | 2              | 62             | 0      | 0      | 0      | 0      | 0      | 0      | 0      | 0      | 0      | 0      | 0      | 0      | 0      | 0      | 0      | 1      | 0      | 0      |
| Pelosinus          | 1              | 1              | 0      | 0      | 0      | 0      | 0      | 0      | 0      | 0      | 0      | 0      | 0      | 0      | 0      | 0      | 0      | 0      | 0      | 0      |
| Pelotomaculum      | 2              | 60             | 0      | 0      | 0      | 1      | 0      | 0      | 0      | 0      | 0      | 1      | 0      | 0      | 0      | 0      | 0      | 1      | 0      | 0      |
| Peptostreptococcus | 1              | 1              | 0      | 0      | 0      | 0      | 0      | 0      | 0      | 0      | 0      | 0      | 0      | 0      | 0      | 0      | 0      | 0      | 0      | 0      |
| Persephonella      | 2              | 55             | 0      | 0      | 0      | 0      | 0      | 0      | 0      | 0      | 0      | 1      | 0      | 0      | 0      | 0      | 0      | 1      | 0      | 0      |
| Petrotoga          | 2              | 72             | 0      | 0      | 0      | 0      | 0      | 0      | 0      | 0      | 0      | 0      | 0      | 0      | 0      | 0      | 0      | 1      | 0      | 0      |
| Phaeobacter        | 2              | 55             | 0      | 0      | 0      | 0      | 0      | 1      | 0      | 0      | 0      | 1      | 0      | 0      | 1      | 0      | 0      | 1      | 0      | 0      |
| Phenylobacterium   | 3              | 103            | 0      | 0      | 0      | 0      | 1      | 0      | 0      | 0      | 0      | 0      | 0      | 0      | 0      | 0      | 0      | 1      | 1      | 0      |
| Photobacterium     | 2              | 119            | 0      | 0      | 0      | 0      | 0      | 0      | 0      | 0      | 1      | 0      | 0      | 0      | 0      | 0      | 0      | 1      | 0      | 0      |
| Photorhabdus       | 2              | 149            | 0      | 0      | 0      | 1      | 0      | 0      | 0      | 0      | 0      | 1      | 0      | 0      | 0      | 0      | 0      | 1      | 1      | 0      |
| Phycisphaera       | 1              | 9              | 0      | 0      | 0      | 0      | 0      | 0      | 0      | 0      | 0      | 1      | 0      | 0      | 0      | 0      | 0      | 1      | 0      | 0      |
| Phyllobacterium    | 1              | 6              | 0      | 0      | 0      | 0      | 0      | 0      | 0      | 0      | 0      | 0      | 0      | 0      | 0      | 0      | 0      | 0      | 0      | 0      |
| Picrophilus        | 1              | 15             | 0      | 0      | 0      | 0      | 0      | 0      | 0      | 0      | 0      | 0      | 0      | 0      | 0      | 0      | 0      | 1      | 0      | 0      |
| Pirellula          | 2              | 85             | 0      | 0      | 0      | 0      | 0      | 0      | 0      | 0      | 0      | 0      | 0      | 0      | 0      | 0      | 0      | 1      | 0      | 0      |
| Planctomyces       | 2              | 93             | 0      | 0      | 0      | 0      | 0      | 0      | 0      | 0      | 0      | 1      | 0      | 0      | 0      | 0      | 0      | 1      | 0      | 0      |
| Plautia            | 1              | 17             | 0      | 0      | 0      | 0      | 0      | 0      | 0      | 0      | 0      | 0      | 0      | 0      | 0      | 0      | 0      | 1      | 0      | 0      |
| Plesiomonas        | 1              | 4              | 0      | 0      | 0      | 0      | 0      | 0      | 0      | 0      | 0      | 0      | 0      | 0      | 0      | 0      | 0      | 0      | 0      | 0      |
| Pleurocapsa        | 1              | 23             | 0      | 0      | 0      | 0      | 0      | 0      | 0      | 0      | 0      | 1      | 0      | 0      | 0      | 0      | 0      | 1      | 0      | 0      |
| Polaribacter       | 2              | 74             | 0      | 0      | 0      | 1      | 1      | 0      | 0      | 0      | 0      | 0      | 0      | 0      | 0      | 0      | 0      | 1      | 0      | 0      |
| Polaromonas        | 3              | 238            | 0      | 0      | 1      | 1      | 1      | 0      | 0      | 1      | 1      | 1      | 0      | 1      | 1      | 0      | 0      | 1      | 1      | 0      |
| Polymorphum        | 3              | 173            | 0      | 0      | 0      | 1      | 1      | 1      | 0      | 0      | 0      | 0      | 0      | 0      | 1      | 0      | 0      | 1      | 0      | 0      |
| Polynucleobacter   | 1              | 19             | 0      | 0      | 0      | 0      | 1      | 0      | 0      | 0      | 1      | 0      | 0      | 0      | 0      | 0      | 0      | 1      | 0      | 0      |
| Ponticaulis        | 1              | 1              | 0      | 0      | 0      | 0      | 0      | 0      | 0      | 0      | 0      | 0      | 0      | 0      | 0      | 0      | 0      | 0      | 0      | 0      |
| Porphyromonas      | 2              | 63             | 0      | 0      | 0      | 0      | 0      | 0      | 0      | 0      | 0      | 0      | 0      | 0      | 0      | 0      | 0      | 1      | 0      | 0      |
| Prevotella         | 1              | 65             | 0      | 0      | 0      | 0      | 0      | 0      | 0      | 0      | 0      | 0      | 0      | 0      | 0      | 0      | 0      | 1      | 0      | 0      |
| Prochlorococcus    | 2              | 68             | 0      | 0      | 0      | 0      | 0      | 0      | 0      | 0      | 0      | 0      | 0      | 0      | 0      | 0      | 0      | 1      | 0      | 0      |
| Propionibacterium  | 1              | 62             | 0      | 0      | 0      | 0      | 1      | 0      | 0      | 0      | 0      | 0      | 0      | 0      | 1      | 0      | 0      | 1      | 0      | 0      |
| Prosthecochloris   | 1              | 16             | 0      | 0      | 0      | 0      | 0      | 0      | 0      | 0      | 0      | 0      | 0      | 0      | 0      | 0      | 0      | 1      | 0      | 0      |
| Proteobacteria     | 1              | 19             | 0      | 0      | 0      | 1      | 0      | 0      | 0      | 0      | 0      | 0      | 0      | 0      | 0      | 1      | 0      | 0      | 0      | 0      |
| Proteus            | 2              | 113            | 0      | 0      | 0      | 0      | 0      | 0      | 0      | 0      | 0      | 1      | 0      | 0      | 0      | 0      | 0      | 1      | 0      | 0      |
| Providencia        | 1              | 38             | 0      | 0      | 0      | 0      | 1      | 0      | 0      | 0      | 0      | 0      | 0      | 0      | 0      | 0      | 0      | 1      | 0      | 0      |
| Pseudaminobacter   | 1              | 10             | 0      | 0      | 0      | 0      | 0      | 0      | 0      | 0      | 0      | 0      | 0      | 0      | 0      | 0      | 0      | 0      | 0      | 0      |
| Pseudanabaena      | 1              | 11             | 0      | 0      | 0      | 0      | 0      | 1      | 0      | 0      | 0      | 1      | 0      | 0      | 0      | 0      | 0      | 1      | 0      | 0      |
| Pseudoalteromonas  | 2              | 188            | 0      | 0      | 1      | 1      | 1      | 0      | 0      | 0      | 0      | 0      | 0      | 0      | 0      | 0      | 0      | 1      | 0      | 0      |
| Pseudochrobactrum  | 1              | 7              | 0      | 0      | 0      | 0      | 0      | 0      | 0      | 0      | 0      | 0      | 0      | 0      | 0      | 0      | 0      | 0      | 0      | 0      |
| Pseudogulbenkiania | 1              | 40             | 0      | 0      | 0      | 0      | 0      | 0      | 0      | 0      | 1      | 1      | 0      | 1      | 1      | 0      | 0      | 1      | 0      | 0      |
| pseudomallei       | 3              | 131            | 0      | 0      | 0      | 0      | 1      | 0      | 0      | 0      | 0      | 1      | 0      | 0      | 1      | 0      | 0      | 1      | 0      | 0      |



| Genus                   | Cluster Number | Protein Counts | K01612 | K01615 | K01617 | K01666 | K01692 | K01721 | K01726 | K01781 | K01800 | K01821 | K01822 | K01856 | K01857 | K01860 | K01913 | K01951 | K02554 | K03268 |
|-------------------------|----------------|----------------|--------|--------|--------|--------|--------|--------|--------|--------|--------|--------|--------|--------|--------|--------|--------|--------|--------|--------|
| Pseudomonas             | 3              | 381            | 0      | 0      | 1      | 1      | 1      | 1      | 1      | 0      | 1      | 1      | 0      | 1      | 1      | 1      | 1      | 1      | 1      | 1      |
| Pseudonocardia          | 3              | 180            | 0      | 0      | 1      | 1      | 1      | 1      | 0      | 1      | 0      | 1      | 0      | 1      | 1      | 0      | 0      | 1      | 0      | 0      |
| Pseudorhodobacter       | 1              | 4              | 0      | 0      | 0      | 0      | 0      | 0      | 0      | 0      | 0      | 0      | 0      | 0      | 0      | 0      | 0      | 0      | 0      | 0      |
| Pseudovibrio            | 1              | 33             | 0      | 0      | 0      | 0      | 1      | 0      | 0      | 0      | 0      | 1      | 0      | 0      | 1      | 0      | 0      | 1      | 0      | 0      |
| Pseudoxanthomonas       | 2              | 124            | 0      | 0      | 1      | 1      | 0      | 0      | 0      | 0      | 1      | 1      | 0      | 0      | 0      | 0      | 0      | 1      | 1      | 0      |
| Psychrobacter           | 2              | 124            | 0      | 0      | 0      | 0      | 0      | 0      | 0      | 0      | 1      | 0      | 0      | 1      | 0      | 0      | 0      | 1      | 0      | 0      |
| Psychroflexus           | 1              | 22             | 0      | 0      | 0      | 1      | 0      | 0      | 0      | 0      | 0      | 0      | 0      | 0      | 0      | 0      | 0      | 1      | 0      | 0      |
| Psychromonas            | 2              | 110            | 0      | 0      | 0      | 0      | 1      | 0      | 0      | 0      | 0      | 0      | 0      | 0      | 0      | 0      | 0      | 1      | 0      | 0      |
| Pusillimonas            | 3              | 111            | 0      | 0      | 0      | 1      | 1      | 0      | 0      | 0      | 0      | 0      | 0      | 0      | 1      | 0      | 0      | 1      | 0      | 0      |
| Pyrobaculum             | 1              | 15             | 0      | 0      | 0      | 0      | 0      | 0      | 0      | 0      | 0      | 0      | 0      | 0      | 0      | 0      | 0      | 1      | 0      | 0      |
| Pyrococcus              | 1              | 10             | 0      | 0      | 0      | 0      | 0      | 0      | 0      | 0      | 0      | 0      | 0      | 0      | 0      | 0      | 0      | 1      | 0      | 0      |
| Pyrolobus               | 1              | 4              | 0      | 0      | 0      | 0      | 0      | 0      | 0      | 0      | 0      | 0      | 0      | 0      | 0      | 0      | 0      | 1      | 0      | 0      |
| Rahnella                | 2              | 143            | 0      | 0      | 0      | 0      | 1      | 1      | 0      | 0      | 0      | 1      | 0      | 0      | 0      | 0      | 0      | 1      | 0      | 0      |
| Ralstonia               | 3              | 332            | 1      | 0      | 1      | 1      | 1      | 0      | 1      | 0      | 1      | 1      | 1      | 1      | 1      | 1      | 1      | 1      | 1      | 1      |
| Ramlibacter             | 1              | 35             | 0      | 0      | 0      | 0      | 1      | 0      | 0      | 1      | 1      | 1      | 0      | 0      | 0      | 0      | 0      | 1      | 0      | 0      |
| Raoultella              | 2              | 139            | 0      | 0      | 0      | 1      | 1      | 0      | 0      | 0      | 0      | 1      | 0      | 1      | 1      | 0      | 0      | 1      | 1      | 0      |
| Raphidiopsis            | 1              | 5              | 0      | 0      | 0      | 0      | 0      | 1      | 0      | 0      | 0      | 0      | 0      | 0      | 0      | 0      | 0      | 0      | 0      | 0      |
| Reinekea                | 1              | 2              | 0      | 0      | 0      | 0      | 0      | 0      | 0      | 0      | 0      | 0      | 0      | 0      | 0      | 0      | 0      | 0      | 0      | 0      |
| Renibacterium           | 2              | 67             | 0      | 0      | 0      | 0      | 1      | 0      | 0      | 0      | 0      | 0      | 0      | 0      | 0      | 0      | 0      | 1      | 0      | 0      |
| Rhizobiaceae            | 1              | 3              | 0      | 0      | 0      | 0      | 0      | 0      | 0      | 0      | 0      | 0      | 0      | 0      | 0      | 0      | 0      | 0      | 0      | 0      |
| Rhizobiales             | 1              | 6              | 0      | 0      | 0      | 0      | 0      | 0      | 0      | 0      | 0      | 0      | 0      | 0      | 0      | 0      | 0      | 0      | 0      | 0      |
| Rhizobium               | 3              | 257            | 0      | 0      | 1      | 1      | 1      | 1      | 0      | 0      | 1      | 1      | 0      | 0      | 1      | 0      | 0      | 1      | 0      | 0      |
| Rhizobium/Agrobacterium | 2              | 87             | 0      | 0      | 1      | 1      | 1      | 0      | 0      | 0      | 0      | 0      | 0      | 0      | 0      | 0      | 0      | 1      | 0      | 0      |
| Rhodanobacter           | 1              | 21             | 0      | 0      | 0      | 0      | 0      | 0      | 0      | 0      | 0      | 0      | 0      | 0      | 0      | 0      | 0      | 1      | 0      | 0      |
| Rhodobacter             | 3              | 175            | 0      | 0      | 0      | 0      | 0      | 0      | 0      | 0      | 0      | 0      | 0      | 0      | 1      | 0      | 0      | 1      | 0      | 0      |
| Rhodobacteraceae        | 1              | 21             | 0      | 0      | 0      | 0      | 0      | 0      | 0      | 0      | 0      | 0      | 0      | 0      | 0      | 0      | 0      | 1      | 0      | 0      |
| Rhodobacterales         | 1              | 34             | 0      | 0      | 0      | 0      | 0      | 0      | 0      | 0      | 0      | 0      | 0      | 0      | 0      | 0      | 0      | 1      | 0      | 0      |
| Rhodococcus             | 2              | 292            | 0      | 0      | 1      | 1      | 1      | 1      | 1      | 0      | 0      | 1      | 1      | 1      | 1      | 0      | 1      | 1      | 1      | 0      |
| Rhodocyclaceae          | 1              | 7              | 0      | 0      | 0      | 0      | 0      | 0      | 0      | 0      | 0      | 0      | 0      | 0      | 0      | 0      | 0      | 0      | 0      | 0      |
| Rhodoferax              | 3              | 144            | 0      | 0      | 0      | 1      | 1      | 0      | 0      | 0      | 0      | 1      | 0      | 0      | 1      | 0      | 0      | 1      | 0      | 0      |
| Rhodomicrobium          | 2              | 103            | 0      | 0      | 0      | 0      | 1      | 1      | 0      | 0      | 0      | 1      | 0      | 0      | 0      | 0      | 0      | 1      | 0      | 0      |
| Rhodopirellula          | 2              | 87             | 0      | 0      | 0      | 0      | 0      | 0      | 0      | 0      | 0      | 1      | 0      | 1      | 0      | 0      | 0      | 1      | 0      | 0      |
| Rhodopseudomonas        | 3              | 246            | 0      | 0      | 0      | 0      | 1      | 1      | 1      | 0      | 1      | 1      | 0      | 0      | 0      | 0      | 1      | 1      | 0      | 0      |
| Rhodospirillum          | 2              | 121            | 0      | 0      | 0      | 0      | 1      | 0      | 0      | 0      | 0      | 0      | 0      | 0      | 0      | 0      | 0      | 1      | 0      | 0      |
| Rhodothermus            | 2              | 76             | 0      | 0      | 0      | 0      | 0      | 0      | 0      | 0      | 0      | 0      | 0      | 0      | 0      | 0      | 0      | 1      | 0      | 0      |
| Rhodovulum              | 1              | 4              | 0      | 0      | 0      | 0      | 0      | 0      | 0      | 0      | 0      | 0      | 0      | 0      | 0      | 0      | 0      | 0      | 0      | 0      |
| Richelia                | 1              | 2              | 0      | 0      | 0      | 0      | 0      | 0      | 0      | 0      | 0      | 0      | 0      | 0      | 0      | 0      | 0      | 0      | 0      | 0      |
| Rickettsia              | 2              | 43             | 0      | 0      | 0      | 0      | 0      | 0      | 0      | 0      | 0      | 0      | 0      | 0      | 0      | 0      | 0      | 0      | 0      | 0      |
| Rickettsiaceae          | 1              | 5              | 0      | 0      | 0      | 0      | 0      | 0      | 0      | 0      | 0      | 0      | 0      | 0      | 0      | 0      | 0      | 0      | 0      | 0      |
| Riemerella              | 2              | 61             | 0      | 0      | 0      | 0      | 0      | 0      | 0      | 0      | 0      | 0      | 0      | 0      | 0      | 0      | 0      | 1      | 0      | 0      |
| Rivularia               | 1              | 18             | 0      | 0      | 0      | 0      | 0      | 0      | 0      | 0      | 0      | 1      | 0      | 0      | 0      | 0      | 0      | 1      | 0      | 0      |
| Robiginitalea           | 2              | 83             | 0      | 0      | 0      | 0      | 0      | 0      | 0      | 0      | 0      | 0      | 0      | 0      | 0      | 0      | 0      | 1      | 0      | 0      |
| Roseburia               | 2              | 58             | 0      | 0      | 0      | 0      | 0      | 0      | 0      | 0      | 0      | 0      | 0      | 0      | 0      | 0      | 0      | 1      | 0      | 0      |
| Roseibium               | 1              | 3              | 0      | 0      | 0      | 0      | 0      | 0      | 0      | 0      | 0      | 0      | 0      | 0      | 0      | 0      | 0      | 0      | 0      | 0      |
| Roseiflexus             | 3              | 100            | 0      | 0      | 0      | 1      | 0      | 0      | 0      | 0      | 0      | 1      | 0      | 0      | 0      | 0      | 0      | 1      | 0      | 0      |
| Roseobacter             | 2              | 149            | 0      | 0      | 0      | 0      | 0      | 1      | 0      | 0      | 1      | 1      | 0      | 0      | 1      | 0      | 0      | 1      | 0      | 0      |
| Roseomonas              | 1              | 2              | 0      | 0      | 0      | 0      | 0      | 0      | 0      | 0      | 0      | 0      | 0      | 0      | 0      | 0      | 0      | 0      | 0      | 0      |
| Roseovarius             | 1              | 15             | 0      | 0      | 0      | 0      | 0      | 0      | 0      | 0      | 0      | 0      | 0      | 0      | 0      | 0      | 0      | 0      | 0      | 0      |
| Rothia                  | 1              | 44             | 0      | 0      | 0      | 0      | 0      | 0      | 0      | 0      | 0      | 0      | 0      | 0      | 0      | 0      | 0      | 1      | 0      | 0      |
| Rubrivivax              | 1              | 24             | 0      | 0      | 0      | 0      | 1      | 0      | 0      | 0      | 0      | 0      | 0      | 0      | 0      | 0      | 0      | 1      | 0      | 0      |
| Rubrobacter             | 3              | 117            | 0      | 0      | 0      | 0      | 0      | 1      | 0      | 0      | 0      | 0      | 0      | 1      | 1      | 0      | 0      | 1      | 0      | 0      |
| Ruegeria                | 2              | 189            | 0      | 0      | 0      | 0      | 1      | 1      | 1      | 0      | 1      | 1      | 0      | 1      | 1      | 0      | 0      | 1      | 0      | 0      |

| Genus             | Cluster Number | Protein Counts | K01612 | K01615 | K01617 | K01666 | K01692 | K01721 | K01726 | K01781 | K01800 | K01821 | K01822 | K01856 | K01857 | K01860 | K01913 | K01951 | K02554 | K03268 |
|-------------------|----------------|----------------|--------|--------|--------|--------|--------|--------|--------|--------|--------|--------|--------|--------|--------|--------|--------|--------|--------|--------|
| Ruminococcaceae   | 1              | 2              | 0      | 0      | 0      | 0      | 0      | 0      | 0      | 0      | 0      | 0      | 0      | 0      | 0      | 0      | 0      | 0      | 0      | 0      |
| Ruminococcus      | 2              | 101            | 0      | 0      | 0      | 1      | 0      | 0      | 0      | 0      | 0      | 0      | 0      | 0      | 0      | 0      | 0      | 1      | 0      | 0      |
| Runella           | 1              | 26             | 0      | 0      | 0      | 0      | 1      | 0      | 0      | 0      | 0      | 0      | 0      | 0      | 1      | 0      | 0      | 1      | 0      | 0      |
| Saccharomonospora | 2              | 132            | 0      | 0      | 0      | 0      | 1      | 0      | 0      | 0      | 0      | 0      | 0      | 0      | 1      | 0      | 0      | 1      | 0      | 0      |
| Saccharophagus    | 2              | 81             | 0      | 0      | 0      | 0      | 0      | 0      | 0      | 0      | 0      | 0      | 0      | 0      | 0      | 0      | 0      | 1      | 0      | 0      |
| Saccharopolyspora | 3              | 194            | 0      | 0      | 0      | 0      | 1      | 0      | 0      | 0      | 0      | 0      | 1      | 1      | 1      | 0      | 1      | 1      | 0      | 0      |
| Saccharothrix     | 1              | 32             | 0      | 0      | 0      | 0      | 1      | 0      | 0      | 0      | 0      | 0      | 0      | 0      | 1      | 0      | 0      | 0      | 0      | 0      |
| Sagittula         | 1              | 10             | 0      | 0      | 0      | 0      | 0      | 0      | 0      | 0      | 0      | 0      | 0      | 0      | 0      | 0      | 0      | 0      | 0      | 0      |
| Salinibacter      | 2              | 77             | 0      | 0      | 0      | 0      | 0      | 0      | 0      | 0      | 0      | 0      | 0      | 0      | 0      | 0      | 0      | 1      | 0      | 0      |
| Salinimonas       | 1              | 1              | 0      | 0      | 0      | 0      | 0      | 0      | 0      | 0      | 0      | 0      | 0      | 0      | 0      | 0      | 0      | 0      | 0      | 0      |
| Salinispora       | 3              | 127            | 0      | 0      | 1      | 1      | 1      | 0      | 0      | 0      | 0      | 1      | 1      | 0      | 1      | 0      | 0      | 1      | 0      | 0      |
| Salinivibrio      | 1              | 2              | 0      | 0      | 0      | 0      | 0      | 0      | 0      | 0      | 0      | 0      | 0      | 0      | 0      | 0      | 0      | 0      | 0      | 0      |
| Salmonella        | 2              | 151            | 0      | 0      | 0      | 0      | 0      | 0      | 0      | 0      | 0      | 0      | 0      | 0      | 0      | 0      | 0      | 1      | 0      | 0      |
| Sanguibacter      | 2              | 73             | 0      | 0      | 0      | 0      | 0      | 0      | 0      | 0      | 0      | 0      | 0      | 0      | 0      | 0      | 0      | 1      | 0      | 0      |
| Saprospira        | 1              | 13             | 0      | 0      | 0      | 0      | 0      | 0      | 0      | 0      | 0      | 0      | 0      | 0      | 0      | 0      | 0      | 1      | 0      | 0      |
| Scardovia         | 1              | 1              | 0      | 0      | 0      | 0      | 0      | 0      | 0      | 0      | 0      | 0      | 0      | 0      | 0      | 0      | 0      | 0      | 0      | 0      |
| Scytonema         | 1              | 10             | 0      | 0      | 0      | 0      | 0      | 0      | 0      | 0      | 0      | 0      | 0      | 0      | 0      | 0      | 0      | 0      | 0      | 0      |
| Sebaldella        | 2              | 69             | 0      | 0      | 0      | 0      | 0      | 0      | 0      | 0      | 0      | 1      | 0      | 0      | 0      | 0      | 0      | 1      | 0      | 0      |
| Segniliparus      | 2              | 85             | 0      | 0      | 0      | 0      | 1      | 0      | 0      | 0      | 0      | 1      | 0      | 0      | 0      | 0      | 0      | 1      | 0      | 0      |
| Selenomonas       | 2              | 57             | 0      | 0      | 0      | 1      | 0      | 0      | 0      | 0      | 0      | 0      | 0      | 0      | 0      | 0      | 0      | 1      | 0      | 0      |
| Serinicoccus      | 1              | 1              | 0      | 0      | 0      | 0      | 0      | 0      | 0      | 0      | 0      | 0      | 0      | 0      | 0      | 0      | 0      | 0      | 0      | 0      |
| Serratia          | 2              | 186            | 0      | 0      | 0      | 1      | 1      | 1      | 0      | 0      | 0      | 1      | 0      | 1      | 1      | 0      | 0      | 1      | 0      | 0      |
| Shewanella        | 3              | 214            | 0      | 0      | 1      | 1      | 1      | 0      | 1      | 0      | 0      | 1      | 1      | 0      | 0      | 0      | 0      | 1      | 0      | 0      |
| Shigella          | 2              | 172            | 0      | 0      | 0      | 1      | 1      | 0      | 0      | 0      | 0      | 1      | 0      | 0      | 0      | 0      | 0      | 1      | 1      | 0      |
| Shinella          | 1              | 2              | 0      | 0      | 0      | 0      | 0      | 0      | 0      | 0      | 0      | 0      | 0      | 0      | 0      | 0      | 0      | 0      | 0      | 0      |
| Sideroxydans      | 2              | 81             | 0      | 0      | 0      | 0      | 0      | 0      | 0      | 0      | 0      | 1      | 0      | 0      | 0      | 0      | 0      | 1      | 0      | 0      |
| Silicibacter      | 2              | 105            | 0      | 0      | 0      | 0      | 0      | 0      | 0      | 0      | 0      | 0      | 0      | 0      | 0      | 0      | 0      | 1      | 0      | 0      |
| Simiduia          | 1              | 18             | 0      | 0      | 0      | 0      | 1      | 0      | 0      | 0      | 0      | 0      | 0      | 0      | 0      | 0      | 0      | 1      | 0      | 0      |
| Simkania          | 1              | 6              | 0      | 0      | 0      | 0      | 0      | 0      | 0      | 0      | 0      | 0      | 0      | 0      | 0      | 0      | 0      | 0      | 0      | 0      |
| Simonsiella       | 1              | 2              | 0      | 0      | 0      | 0      | 0      | 0      | 0      | 0      | 0      | 0      | 0      | 0      | 0      | 0      | 0      | 1      | 0      | 0      |
| Singulisphaera    | 1              | 18             | 0      | 0      | 0      | 0      | 0      | 0      | 0      | 0      | 0      | 0      | 0      | 1      | 0      | 0      | 0      | 1      | 0      | 0      |
| Sinorhizobium     | 3              | 207            | 0      | 0      | 0      | 0      | 1      | 1      | 0      | 0      | 1      | 1      | 0      | 1      | 1      | 0      | 0      | 1      | 0      | 0      |
| Slackia           | 2              | 46             | 0      | 0      | 0      | 0      | 0      | 0      | 0      | 0      | 0      | 0      | 0      | 0      | 0      | 0      | 0      | 1      | 0      | 0      |
| Smaragdicooccus   | 1              | 3              | 0      | 0      | 0      | 0      | 0      | 0      | 0      | 0      | 0      | 0      | 0      | 0      | 0      | 0      | 0      | 0      | 0      | 0      |
| Sodalis           | 2              | 71             | 0      | 0      | 0      | 0      | 0      | 0      | 0      | 0      | 0      | 0      | 0      | 0      | 0      | 0      | 0      | 1      | 0      | 0      |
| Solibacillus      | 1              | 23             | 0      | 0      | 0      | 1      | 0      | 0      | 0      | 0      | 0      | 1      | 0      | 0      | 0      | 0      | 0      | 1      | 1      | 0      |
| Solitaea          | 1              | 13             | 0      | 0      | 0      | 0      | 0      | 0      | 0      | 0      | 0      | 0      | 0      | 0      | 0      | 0      | 0      | 1      | 0      | 0      |
| Sorangium         | 3              | 115            | 0      | 0      | 0      | 0      | 0      | 0      | 0      | 0      | 0      | 0      | 0      | 0      | 0      | 0      | 0      | 1      | 0      | 0      |
| Sphaerobacter     | 2              | 100            | 0      | 0      | 0      | 0      | 1      | 0      | 0      | 0      | 0      | 0      | 0      | 0      | 1      | 0      | 0      | 1      | 0      | 0      |
| Sphaerochaeta     | 1              | 42             | 0      | 0      | 0      | 0      | 0      | 0      | 0      | 0      | 0      | 0      | 0      | 0      | 0      | 0      | 0      | 1      | 0      | 0      |
| Sphingobacterium  | 3              | 85             | 0      | 0      | 0      | 0      | 0      | 0      | 0      | 0      | 0      | 0      | 0      | 0      | 0      | 0      | 0      | 1      | 0      | 0      |
| Sphingobium       | 1              | 179            | 0      | 0      | 1      | 1      | 1      | 0      | 0      | 0      | 0      | 1      | 0      | 1      | 0      | 1      | 0      | 1      | 1      | 0      |
| Sphingomonadaceae | 1              | 15             | 0      | 0      | 0      | 0      | 0      | 0      | 0      | 0      | 0      | 0      | 0      | 0      | 0      | 0      | 0      | 0      | 0      | 0      |
| Sphingomonas      | 2              | 220            | 0      | 0      | 1      | 1      | 1      | 0      | 0      | 0      | 1      | 1      | 1      | 1      | 1      | 0      | 0      | 1      | 1      | 0      |
| Sphingopyxis      | 3              | 99             | 0      | 0      | 0      | 0      | 1      | 0      | 0      | 0      | 1      | 1      | 0      | 0      | 0      | 0      | 0      | 1      | 1      | 0      |
| Spirochaeta       | 2              | 103            | 0      | 0      | 0      | 1      | 0      | 0      | 0      | 0      | 0      | 0      | 0      | 0      | 0      | 0      | 0      | 1      | 0      | 0      |
| Spiroplasma       | 1              | 6              | 0      | 0      | 0      | 0      | 0      | 0      | 0      | 0      | 0      | 0      | 0      | 0      | 0      | 0      | 0      | 1      | 0      | 0      |
| Spirosoma         | 2              | 107            | 0      | 0      | 0      | 0      | 1      | 0      | 0      | 0      | 0      | 0      | 0      | 0      | 1      | 0      | 0      | 1      | 0      | 0      |
| Stackebrandtia    | 2              | 110            | 0      | 0      | 0      | 0      | 1      | 0      | 0      | 0      | 0      | 0      | 0      | 0      | 1      | 0      | 0      | 1      | 0      | 0      |
| Stanieria         | 1              | 17             | 0      | 0      | 0      | 0      | 0      | 0      | 0      | 0      | 0      | 0      | 0      | 0      | 0      | 0      | 0      | 1      | 0      | 0      |
| Staphylococcus    | 2              | 108            | 0      | 0      | 0      | 0      | 0      | 0      | 0      | 0      | 0      | 1      | 0      | 0      | 0      | 0      | 0      | 1      | 0      | 0      |
| Staphylothermus   | 1              | 12             | 0      | 0      | 0      | 0      | 0      | 0      | 0      | 0      | 0      | 0      | 0      | 0      | 0      | 0      | 0      | 1      | 0      | 0      |

| Genus                  | Cluster Number | Protein Counts | K01612 | K01615 | K01617 | K01666 | K01692 | K01721 | K01726 | K01781 | K01800 | K01821 | K01822 | K01856 | K01857 | K01860 | K01913 | K01951 | K02554 | K03268 |
|------------------------|----------------|----------------|--------|--------|--------|--------|--------|--------|--------|--------|--------|--------|--------|--------|--------|--------|--------|--------|--------|--------|
| Stappia                | 1              | 2              | 0      | 0      | 0      | 0      | 0      | 0      | 0      | 0      | 0      | 0      | 0      | 0      | 0      | 0      | 0      | 0      | 0      | 0      |
| Starkeya               | 3              | 134            | 0      | 0      | 0      | 0      | 1      | 0      | 0      | 0      | 0      | 1      | 0      | 0      | 0      | 0      | 0      | 1      | 0      | 0      |
| Stenotrophomonas       | 3              | 104            | 0      | 0      | 0      | 0      | 0      | 0      | 0      | 0      | 1      | 0      | 0      | 0      | 0      | 0      | 0      | 1      | 0      | 0      |
| Stigmatella            | 3              | 129            | 0      | 0      | 1      | 0      | 1      | 0      | 0      | 0      | 0      | 0      | 0      | 0      | 1      | 0      | 0      | 1      | 0      | 0      |
| Streptobacillus        | 1              | 38             | 0      | 0      | 0      | 0      | 0      | 0      | 0      | 0      | 0      | 0      | 0      | 0      | 0      | 0      | 0      | 1      | 0      | 0      |
| Streptococcus          | 2              | 121            | 0      | 0      | 0      | 0      | 0      | 0      | 0      | 0      | 0      | 1      | 0      | 0      | 0      | 0      | 0      | 1      | 0      | 0      |
| Streptomyces           | 2              | 253            | 0      | 0      | 1      | 1      | 1      | 1      | 0      | 0      | 0      | 1      | 1      | 1      | 1      | 0      | 1      | 1      | 1      | 0      |
| Streptosporangium      | 3              | 148            | 0      | 0      | 1      | 1      | 1      | 0      | 0      | 0      | 0      | 0      | 0      | 0      | 1      | 0      | 0      | 1      | 1      | 0      |
| Strigomonas            | 1              | 2              | 0      | 0      | 0      | 0      | 0      | 0      | 0      | 0      | 0      | 0      | 0      | 0      | 0      | 0      | 0      | 1      | 0      | 0      |
| Sulfitobacter          | 1              | 10             | 0      | 0      | 0      | 0      | 0      | 0      | 0      | 0      | 0      | 0      | 0      | 0      | 0      | 0      | 0      | 0      | 0      | 0      |
| Sulfobacillus          | 1              | 30             | 0      | 0      | 1      | 1      | 1      | 0      | 0      | 0      | 0      | 1      | 0      | 0      | 0      | 0      | 0      | 1      | 0      | 0      |
| Sulfolobus             | 1              | 23             | 0      | 0      | 0      | 0      | 0      | 0      | 0      | 0      | 0      | 0      | 0      | 0      | 0      | 0      | 0      | 1      | 0      | 0      |
| Sulfuricurvum          | 2              | 67             | 0      | 0      | 0      | 0      | 0      | 0      | 0      | 0      | 0      | 0      | 0      | 0      | 0      | 0      | 0      | 1      | 0      | 0      |
| Sulfurihydrogenibium   | 2              | 55             | 0      | 0      | 0      | 0      | 0      | 0      | 0      | 0      | 0      | 1      | 0      | 0      | 0      | 0      | 0      | 1      | 0      | 0      |
| Sulfurimonas           | 2              | 60             | 0      | 0      | 0      | 0      | 0      | 0      | 0      | 0      | 0      | 0      | 0      | 0      | 0      | 0      | 0      | 1      | 0      | 0      |
| Sulfurospirillum       | 1              | 48             | 0      | 0      | 0      | 0      | 0      | 0      | 0      | 0      | 0      | 1      | 0      | 0      | 0      | 0      | 0      | 1      | 0      | 0      |
| Sulfurovum             | 2              | 48             | 0      | 0      | 0      | 1      | 0      | 0      | 0      | 0      | 0      | 0      | 0      | 0      | 0      | 0      | 0      | 1      | 0      | 0      |
| Symbiobacterium        | 2              | 68             | 0      | 0      | 0      | 0      | 1      | 0      | 0      | 0      | 0      | 1      | 0      | 0      | 0      | 0      | 0      | 1      | 0      | 0      |
| Synechococcus          | 1              | 34             | 0      | 0      | 0      | 1      | 0      | 1      | 0      | 0      | 0      | 0      | 0      | 0      | 0      | 0      | 0      | 1      | 0      | 0      |
| Synechocystis          | 1              | 40             | 0      | 0      | 0      | 0      | 0      | 0      | 0      | 0      | 0      | 0      | 0      | 0      | 0      | 0      | 0      | 1      | 0      | 0      |
| Synergistetes          | 1              | 27             | 0      | 0      | 0      | 0      | 0      | 0      | 0      | 0      | 0      | 0      | 0      | 0      | 0      | 0      | 0      | 0      | 0      | 0      |
| Syntrophobacter        | 2              | 101            | 0      | 0      | 0      | 0      | 0      | 0      | 0      | 0      | 0      | 1      | 0      | 0      | 0      | 0      | 0      | 1      | 0      | 0      |
| Syntrophobotulus       | 2              | 71             | 0      | 0      | 0      | 0      | 0      | 0      | 0      | 0      | 0      | 1      | 0      | 0      | 0      | 0      | 0      | 1      | 0      | 0      |
| Syntrophomonas         | 2              | 58             | 0      | 0      | 0      | 0      | 0      | 0      | 0      | 0      | 0      | 0      | 0      | 0      | 0      | 0      | 0      | 1      | 0      | 0      |
| Syntrophothermus       | 2              | 60             | 0      | 0      | 0      | 0      | 0      | 0      | 0      | 0      | 0      | 0      | 0      | 0      | 0      | 0      | 0      | 1      | 0      | 0      |
| Syntrophus             | 2              | 66             | 0      | 0      | 0      | 0      | 0      | 0      | 0      | 0      | 0      | 0      | 0      | 0      | 0      | 0      | 0      | 1      | 0      | 0      |
| Tannerella             | 1              | 8              | 0      | 0      | 0      | 0      | 0      | 0      | 0      | 0      | 0      | 0      | 0      | 0      | 0      | 0      | 0      | 1      | 0      | 0      |
| Taylorella             | 1              | 43             | 0      | 0      | 0      | 0      | 0      | 0      | 0      | 0      | 0      | 0      | 0      | 0      | 0      | 0      | 0      | 1      | 1      | 0      |
| Tepidanaerobacter      | 2              | 55             | 0      | 0      | 0      | 0      | 0      | 0      | 0      | 0      | 0      | 0      | 0      | 0      | 0      | 0      | 0      | 1      | 0      | 0      |
| Teredinibacter         | 2              | 109            | 0      | 0      | 0      | 1      | 0      | 0      | 0      | 0      | 0      | 0      | 0      | 0      | 0      | 0      | 0      | 1      | 1      | 0      |
| Terrabacter            | 1              | 1              | 0      | 0      | 0      | 0      | 0      | 0      | 0      | 0      | 0      | 0      | 0      | 0      | 0      | 0      | 0      | 0      | 0      | 0      |
| Terriglobus            | 2              | 83             | 0      | 0      | 0      | 0      | 0      | 0      | 0      | 0      | 0      | 1      | 0      | 0      | 0      | 0      | 0      | 1      | 0      | 0      |
| Tetragenococcus        | 1              | 12             | 0      | 0      | 0      | 0      | 0      | 0      | 0      | 0      | 0      | 0      | 0      | 0      | 0      | 0      | 0      | 1      | 0      | 0      |
| Thalassiobium          | 1              | 11             | 0      | 0      | 0      | 0      | 0      | 0      | 0      | 0      | 0      | 0      | 0      | 0      | 0      | 0      | 0      | 0      | 0      | 0      |
| Thalassobacter         | 1              | 9              | 0      | 0      | 0      | 0      | 0      | 0      | 0      | 0      | 0      | 0      | 0      | 0      | 0      | 0      | 0      | 0      | 0      | 0      |
| Thalassolituus         | 1              | 12             | 0      | 0      | 0      | 0      | 0      | 0      | 0      | 0      | 0      | 0      | 0      | 0      | 0      | 0      | 0      | 1      | 0      | 0      |
| Thalassospira          | 1              | 2              | 0      | 0      | 0      | 0      | 0      | 0      | 0      | 0      | 0      | 0      | 0      | 0      | 0      | 0      | 0      | 0      | 0      | 0      |
| Thauera                | 1              | 111            | 0      | 0      | 1      | 1      | 1      | 0      | 0      | 0      | 0      | 1      | 0      | 0      | 0      | 0      | 0      | 1      | 1      | 0      |
| Thermacetogenium       | 1              | 7              | 0      | 0      | 0      | 0      | 0      | 0      | 0      | 0      | 0      | 0      | 0      | 0      | 0      | 0      | 0      | 1      | 0      | 0      |
| Thermaerobacter        | 2              | 79             | 0      | 0      | 0      | 1      | 1      | 0      | 0      | 0      | 0      | 1      | 0      | 0      | 0      | 0      | 0      | 1      | 0      | 0      |
| Thermanaerovibrio      | 2              | 58             | 0      | 0      | 0      | 0      | 0      | 0      | 0      | 0      | 0      | 1      | 0      | 0      | 0      | 0      | 0      | 1      | 0      | 0      |
| Thermincola            | 2              | 62             | 0      | 0      | 0      | 0      | 0      | 0      | 0      | 0      | 0      | 0      | 0      | 0      | 0      | 0      | 0      | 1      | 0      | 0      |
| Thermoanaerobacter     | 2              | 76             | 0      | 0      | 0      | 0      | 0      | 0      | 0      | 0      | 0      | 1      | 0      | 0      | 0      | 0      | 0      | 1      | 0      | 0      |
| Thermoanaerobacterium  | 2              | 64             | 0      | 0      | 0      | 0      | 0      | 0      | 0      | 0      | 0      | 0      | 0      | 0      | 0      | 0      | 0      | 1      | 0      | 0      |
| Thermobacillus         | 1              | 11             | 0      | 0      | 0      | 1      | 0      | 0      | 0      | 0      | 0      | 0      | 0      | 0      | 0      | 0      | 0      | 1      | 0      | 0      |
| Thermobaculum          | 2              | 62             | 0      | 0      | 0      | 0      | 0      | 0      | 0      | 0      | 0      | 0      | 0      | 0      | 0      | 0      | 0      | 1      | 0      | 0      |
| Thermobifida           | 2              | 72             | 0      | 0      | 0      | 0      | 1      | 0      | 0      | 0      | 0      | 0      | 0      | 0      | 0      | 0      | 0      | 1      | 0      | 0      |
| Thermobispora          | 2              | 109            | 0      | 0      | 0      | 0      | 1      | 0      | 0      | 0      | 0      | 0      | 0      | 0      | 1      | 0      | 0      | 1      | 0      | 0      |
| Thermococcus           | 1              | 13             | 0      | 0      | 0      | 0      | 0      | 0      | 0      | 0      | 0      | 1      | 0      | 0      | 0      | 0      | 0      | 1      | 0      | 0      |
| Thermocrinis           | 2              | 60             | 0      | 0      | 0      | 0      | 0      | 0      | 0      | 0      | 0      | 0      | 0      | 0      | 0      | 0      | 0      | 1      | 0      | 0      |
| Thermodesulfator       | 1              | 10             | 0      | 0      | 0      | 0      | 0      | 0      | 0      | 0      | 0      | 0      | 0      | 0      | 0      | 0      | 0      | 1      | 0      | 0      |
| Thermodesulfobacterium | 1              | 9              | 0      | 0      | 0      | 0      | 0      | 0      | 0      | 0      | 0      | 0      | 0      | 0      | 0      | 0      | 0      | 1      | 0      | 0      |

| Genus                       | Cluster Number | Protein Counts | K01612 | K01615 | K01617 | K01666 | K01692 | K01721 | K01726 | K01781 | K01800 | K01821 | K01822 | K01856 | K01857 | K01860 | K01913 | K01951 | K02554 | K03268 |
|-----------------------------|----------------|----------------|--------|--------|--------|--------|--------|--------|--------|--------|--------|--------|--------|--------|--------|--------|--------|--------|--------|--------|
| <b>Thermodesulfobium</b>    | 1              | 13             | 0      | 0      | 0      | 0      | 0      | 0      | 0      | 0      | 0      | 1      | 0      | 0      | 0      | 0      | 0      | 1      | 0      | 0      |
| <b>Thermodesulfobivrio</b>  | 2              | 60             | 0      | 0      | 0      | 0      | 0      | 0      | 0      | 0      | 0      | 0      | 0      | 0      | 0      | 0      | 0      | 1      | 0      | 0      |
| <b>Thermofilum</b>          | 1              | 9              | 0      | 0      | 0      | 0      | 0      | 0      | 0      | 0      | 0      | 0      | 0      | 0      | 0      | 0      | 0      | 0      | 0      | 0      |
| <b>Thermogladus</b>         | 1              | 7              | 0      | 0      | 0      | 0      | 0      | 0      | 0      | 0      | 0      | 0      | 0      | 0      | 0      | 0      | 0      | 0      | 0      | 0      |
| <b>Thermomicrobium</b>      | 2              | 92             | 0      | 0      | 0      | 1      | 1      | 0      | 0      | 0      | 0      | 1      | 0      | 0      | 0      | 0      | 0      | 1      | 0      | 0      |
| <b>Thermomonospora</b>      | 2              | 125            | 0      | 0      | 1      | 1      | 1      | 0      | 0      | 0      | 0      | 1      | 0      | 0      | 1      | 0      | 0      | 1      | 0      | 0      |
| <b>Thermoplasma</b>         | 1              | 11             | 0      | 0      | 0      | 0      | 0      | 0      | 0      | 0      | 0      | 0      | 0      | 0      | 0      | 0      | 0      | 1      | 0      | 0      |
| <b>Thermoplasmatales</b>    | 1              | 6              | 0      | 0      | 0      | 1      | 0      | 0      | 0      | 0      | 0      | 0      | 0      | 0      | 0      | 0      | 0      | 1      | 0      | 0      |
| <b>Thermoproteus</b>        | 1              | 12             | 0      | 0      | 0      | 0      | 0      | 0      | 0      | 0      | 0      | 0      | 0      | 0      | 0      | 0      | 0      | 1      | 0      | 0      |
| <b>Thermosediminibacter</b> | 2              | 64             | 0      | 0      | 0      | 1      | 0      | 0      | 0      | 0      | 0      | 0      | 0      | 0      | 0      | 0      | 0      | 1      | 0      | 0      |
| <b>Thermosipho</b>          | 2              | 70             | 0      | 0      | 0      | 0      | 0      | 0      | 0      | 0      | 0      | 0      | 0      | 0      | 0      | 0      | 0      | 1      | 0      | 0      |
| <b>Thermosphaera</b>        | 1              | 10             | 0      | 0      | 0      | 0      | 0      | 0      | 0      | 0      | 0      | 1      | 0      | 0      | 0      | 0      | 0      | 1      | 0      | 0      |
| <b>Thermosynechococcus</b>  | 1              | 6              | 0      | 0      | 0      | 0      | 0      | 0      | 0      | 0      | 0      | 0      | 0      | 0      | 0      | 0      | 0      | 1      | 0      | 0      |
| <b>Thermotoga</b>           | 2              | 80             | 0      | 0      | 0      | 0      | 0      | 0      | 0      | 0      | 0      | 0      | 0      | 0      | 0      | 0      | 0      | 1      | 0      | 0      |
| <b>Thermovibrio</b>         | 2              | 58             | 0      | 0      | 0      | 0      | 0      | 0      | 0      | 0      | 0      | 0      | 0      | 0      | 0      | 0      | 0      | 1      | 0      | 0      |
| <b>Thermovirga</b>          | 1              | 9              | 0      | 0      | 0      | 0      | 0      | 0      | 0      | 0      | 0      | 1      | 0      | 0      | 0      | 0      | 0      | 1      | 0      | 0      |
| <b>Thermus</b>              | 2              | 107            | 0      | 0      | 0      | 1      | 1      | 0      | 0      | 0      | 0      | 1      | 0      | 1      | 0      | 0      | 0      | 1      | 1      | 0      |
| <b>Thioalkalimicrobium</b>  | 1              | 4              | 0      | 0      | 0      | 1      | 0      | 0      | 0      | 0      | 0      | 0      | 0      | 0      | 0      | 0      | 0      | 1      | 0      | 0      |
| <b>Thioalkalivibrio</b>     | 2              | 91             | 0      | 0      | 0      | 0      | 0      | 0      | 0      | 0      | 0      | 1      | 0      | 0      | 0      | 0      | 0      | 1      | 0      | 0      |
| <b>Thiobaca</b>             | 1              | 2              | 0      | 0      | 0      | 0      | 0      | 0      | 0      | 0      | 0      | 0      | 0      | 0      | 0      | 0      | 0      | 0      | 0      | 0      |
| <b>Thiobacillus</b>         | 2              | 67             | 0      | 0      | 0      | 0      | 0      | 0      | 0      | 0      | 0      | 1      | 0      | 0      | 0      | 0      | 0      | 1      | 0      | 0      |
| <b>Thiocapsa</b>            | 1              | 2              | 0      | 0      | 0      | 0      | 0      | 0      | 0      | 0      | 0      | 0      | 0      | 0      | 0      | 0      | 0      | 0      | 0      | 0      |
| <b>Thiocystis</b>           | 1              | 11             | 0      | 0      | 0      | 1      | 0      | 0      | 0      | 0      | 0      | 0      | 0      | 0      | 0      | 0      | 0      | 1      | 0      | 0      |
| <b>Thioflavococcus</b>      | 1              | 13             | 0      | 0      | 0      | 1      | 0      | 0      | 0      | 0      | 0      | 0      | 0      | 0      | 0      | 0      | 0      | 1      | 0      | 0      |
| <b>Thiomicrospira</b>       | 2              | 50             | 0      | 0      | 0      | 0      | 0      | 0      | 0      | 0      | 0      | 0      | 0      | 0      | 0      | 0      | 0      | 1      | 0      | 0      |
| <b>Thiomonas</b>            | 2              | 85             | 0      | 0      | 0      | 0      | 1      | 0      | 0      | 0      | 0      | 1      | 0      | 0      | 0      | 0      | 0      | 1      | 0      | 0      |
| <b>Thiorhodococcus</b>      | 1              | 2              | 0      | 0      | 0      | 0      | 0      | 0      | 0      | 0      | 0      | 0      | 0      | 0      | 0      | 0      | 0      | 0      | 0      | 0      |
| <b>Thiothrix</b>            | 1              | 2              | 0      | 0      | 0      | 0      | 0      | 0      | 0      | 0      | 0      | 0      | 0      | 0      | 0      | 0      | 0      | 0      | 0      | 0      |
| <b>Tistrella</b>            | 1              | 42             | 0      | 0      | 0      | 1      | 1      | 1      | 0      | 0      | 0      | 1      | 0      | 1      | 1      | 0      | 0      | 1      | 0      | 0      |
| <b>Tolumonas</b>            | 2              | 100            | 0      | 0      | 0      | 0      | 0      | 0      | 0      | 0      | 0      | 1      | 0      | 0      | 0      | 0      | 0      | 1      | 0      | 0      |
| <b>Transposon</b>           | 1              | 2              | 0      | 0      | 0      | 0      | 0      | 0      | 0      | 0      | 0      | 0      | 0      | 0      | 0      | 0      | 0      | 0      | 0      | 0      |
| <b>Treponema</b>            | 1              | 63             | 0      | 0      | 0      | 1      | 0      | 0      | 0      | 0      | 0      | 1      | 0      | 0      | 0      | 0      | 0      | 1      | 1      | 0      |
| <b>Trichodesmium</b>        | 2              | 71             | 0      | 0      | 0      | 0      | 0      | 0      | 0      | 0      | 0      | 0      | 0      | 0      | 0      | 0      | 0      | 1      | 0      | 0      |
| <b>Trichormus</b>           | 1              | 12             | 0      | 0      | 0      | 0      | 0      | 0      | 0      | 0      | 0      | 0      | 0      | 0      | 0      | 0      | 0      | 1      | 0      | 0      |
| <b>Tropheryma</b>           | 2              | 22             | 0      | 0      | 0      | 0      | 0      | 0      | 0      | 0      | 0      | 0      | 0      | 0      | 0      | 0      | 0      | 1      | 0      | 0      |
| <b>Truepera</b>             | 2              | 104            | 0      | 0      | 0      | 0      | 0      | 0      | 0      | 0      | 0      | 0      | 0      | 0      | 0      | 0      | 0      | 1      | 0      | 0      |
| <b>Tsukamurella</b>         | 2              | 123            | 0      | 0      | 0      | 1      | 1      | 0      | 0      | 0      | 0      | 0      | 0      | 0      | 1      | 0      | 0      | 1      | 0      | 0      |
| <b>Turneriella</b>          | 1              | 16             | 0      | 0      | 0      | 0      | 1      | 0      | 0      | 0      | 0      | 1      | 0      | 0      | 0      | 0      | 0      | 1      | 0      | 0      |
| <b>Uliginosibacterium</b>   | 1              | 2              | 0      | 0      | 0      | 0      | 0      | 0      | 0      | 0      | 0      | 0      | 0      | 0      | 0      | 0      | 0      | 0      | 0      | 0      |
| <b>Ureaplasma</b>           | 1              | 24             | 0      | 0      | 0      | 0      | 0      | 0      | 0      | 0      | 0      | 0      | 0      | 0      | 0      | 0      | 0      | 0      | 0      | 0      |
| <b>Ureibacillus</b>         | 1              | 2              | 0      | 0      | 0      | 0      | 0      | 0      | 0      | 0      | 0      | 0      | 0      | 0      | 0      | 0      | 0      | 0      | 0      | 0      |
| <b>Variovorax</b>           | 3              | 187            | 0      | 0      | 0      | 0      | 1      | 1      | 0      | 0      | 0      | 1      | 0      | 1      | 1      | 0      | 0      | 1      | 0      | 0      |
| <b>Veillonella</b>          | 1              | 54             | 0      | 1      | 0      | 0      | 0      | 0      | 0      | 0      | 0      | 1      | 0      | 0      | 0      | 0      | 0      | 1      | 0      | 0      |
| <b>Verminephrobacter</b>    | 3              | 188            | 0      | 0      | 1      | 1      | 1      | 0      | 0      | 0      | 0      | 1      | 0      | 0      | 1      | 0      | 0      | 1      | 1      | 0      |
| <b>Verrucosispora</b>       | 3              | 126            | 0      | 0      | 1      | 1      | 1      | 0      | 0      | 0      | 0      | 0      | 0      | 0      | 1      | 0      | 0      | 1      | 0      | 0      |
| <b>Vibrio</b>               | 2              | 195            | 0      | 0      | 0      | 1      | 0      | 0      | 1      | 0      | 1      | 0      | 0      | 1      | 1      | 0      | 0      | 1      | 1      | 0      |
| <b>Vibrionales</b>          | 1              | 46             | 0      | 0      | 0      | 0      | 0      | 0      | 0      | 0      | 0      | 0      | 0      | 0      | 0      | 0      | 0      | 1      | 0      | 0      |
| <b>Vitreoscilla</b>         | 1              | 1              | 0      | 0      | 0      | 0      | 0      | 0      | 0      | 0      | 0      | 0      | 0      | 0      | 0      | 0      | 0      | 0      | 0      | 0      |
| <b>Vulcanisaeta</b>         | 1              | 14             | 0      | 0      | 0      | 0      | 1      | 0      | 0      | 0      | 0      | 0      | 0      | 0      | 0      | 0      | 0      | 1      | 0      | 0      |
| <b>Waddlia</b>              | 2              | 68             | 0      | 0      | 0      | 0      | 0      | 0      | 0      | 0      | 0      | 0      | 0      | 0      | 0      | 0      | 0      | 1      | 0      | 0      |
| <b>Wautersia</b>            | 1              | 2              | 0      | 0      | 0      | 0      | 0      | 0      | 0      | 0      | 0      | 0      | 0      | 0      | 0      | 0      | 0      | 0      | 0      | 0      |
| <b>Weeksella</b>            | 2              | 65             | 0      | 0      | 0      | 0      | 0      | 0      | 0      | 0      | 0      | 0      | 0      | 0      | 0      | 0      | 0      | 1      | 0      | 0      |

| Genus             | Cluster Number | Protein Counts | K01612 | K01615 | K01617 | K01666 | K01692 | K01721 | K01726 | K01781 | K01800 | K01821 | K01822 | K01856 | K01857 | K01860 | K01913 | K01951 | K02554 | K03268 |
|-------------------|----------------|----------------|--------|--------|--------|--------|--------|--------|--------|--------|--------|--------|--------|--------|--------|--------|--------|--------|--------|--------|
| Weissella         | 1              | 14             | 0      | 0      | 0      | 0      | 0      | 0      | 0      | 0      | 0      | 1      | 0      | 0      | 0      | 0      | 0      | 1      | 0      | 0      |
| Wenxinia          | 1              | 2              | 0      | 0      | 0      | 0      | 0      | 0      | 0      | 0      | 0      | 0      | 0      | 0      | 0      | 0      | 0      | 0      | 0      | 0      |
| Wigglesworthia    | 1              | 29             | 0      | 0      | 0      | 0      | 0      | 0      | 0      | 0      | 0      | 0      | 0      | 0      | 0      | 0      | 0      | 1      | 0      | 0      |
| Wolbachia         | 1              | 32             | 0      | 0      | 0      | 0      | 0      | 0      | 0      | 0      | 0      | 0      | 0      | 0      | 0      | 0      | 0      | 1      | 0      | 0      |
| Wolinella         | 2              | 51             | 0      | 0      | 0      | 0      | 0      | 0      | 0      | 0      | 0      | 1      | 0      | 0      | 0      | 0      | 0      | 1      | 0      | 0      |
| Xanthobacter      | 3              | 176            | 0      | 0      | 0      | 1      | 1      | 0      | 0      | 0      | 0      | 1      | 1      | 1      | 1      | 0      | 0      | 1      | 1      | 0      |
| Xanthobacteraceae | 1              | 4              | 0      | 0      | 0      | 0      | 0      | 0      | 0      | 0      | 0      | 0      | 0      | 0      | 0      | 0      | 0      | 0      | 0      | 0      |
| Xanthomonadaceae  | 1              | 39             | 0      | 0      | 0      | 0      | 0      | 0      | 0      | 0      | 0      | 0      | 0      | 0      | 0      | 0      | 0      | 1      | 0      | 0      |
| Xanthomonas       | 2              | 162            | 0      | 0      | 0      | 0      | 0      | 0      | 0      | 0      | 1      | 0      | 0      | 0      | 1      | 0      | 0      | 1      | 1      | 0      |
| Xenorhabdus       | 2              | 127            | 0      | 0      | 0      | 1      | 1      | 0      | 0      | 0      | 0      | 1      | 0      | 0      | 0      | 0      | 0      | 1      | 0      | 0      |
| Xylanimonas       | 2              | 66             | 0      | 0      | 0      | 0      | 0      | 0      | 0      | 0      | 0      | 0      | 0      | 0      | 0      | 0      | 0      | 1      | 0      | 0      |
| Xylella           | 2              | 52             | 0      | 0      | 0      | 0      | 0      | 0      | 0      | 0      | 0      | 1      | 0      | 0      | 0      | 0      | 0      | 1      | 0      | 0      |
| Yersinia          | 2              | 145            | 0      | 0      | 0      | 0      | 0      | 0      | 1      | 0      | 0      | 1      | 0      | 0      | 0      | 0      | 0      | 1      | 0      | 0      |
| Yokenella         | 2              | 61             | 0      | 0      | 0      | 0      | 0      | 0      | 0      | 0      | 0      | 0      | 0      | 0      | 0      | 0      | 0      | 1      | 0      | 0      |
| Zobellia          | 1              | 28             | 0      | 0      | 0      | 0      | 0      | 0      | 0      | 0      | 0      | 0      | 0      | 0      | 0      | 0      | 0      | 1      | 0      | 0      |
| Zunongwangia      | 2              | 98             | 0      | 0      | 0      | 0      | 0      | 0      | 0      | 0      | 0      | 0      | 0      | 0      | 0      | 0      | 0      | 1      | 0      | 0      |
| Zymomonas         | 2              | 67             | 0      | 0      | 0      | 0      | 0      | 0      | 0      | 1      | 0      | 0      | 0      | 0      | 0      | 0      | 0      | 1      | 0      | 0      |
| Zymophilus        | 1              | 2              | 0      | 0      | 0      | 0      | 0      | 0      | 0      | 0      | 0      | 0      | 0      | 0      | 0      | 0      | 0      | 0      | 0      | 0      |

| Genus               | Cluster Number | Protein Counts | K03333 | K03379 | K03380 | K03381 | K03382 | K03383 | K03384 | K03391 | K03464 | K03518 | K03862 | K04098 | K04099 | K04100 | K04102 | K04105 | K04107 | K04110 |
|---------------------|----------------|----------------|--------|--------|--------|--------|--------|--------|--------|--------|--------|--------|--------|--------|--------|--------|--------|--------|--------|--------|
| Acaricomes          | 1              | 2              | 0      | 0      | 0      | 0      | 0      | 0      | 0      | 0      | 0      | 0      | 0      | 0      | 0      | 0      | 0      | 0      | 0      | 0      |
| Acaryochloris       | 2              | 88             | 0      | 0      | 0      | 0      | 0      | 0      | 0      | 0      | 0      | 0      | 0      | 0      | 0      | 0      | 0      | 0      | 0      | 0      |
| Acetivibrio         | 1              | 2              | 0      | 0      | 0      | 0      | 0      | 0      | 0      | 0      | 0      | 0      | 0      | 0      | 0      | 0      | 0      | 0      | 0      | 0      |
| Acetobacter         | 2              | 85             | 0      | 0      | 0      | 0      | 1      | 0      | 0      | 0      | 0      | 0      | 1      | 0      | 0      | 0      | 0      | 0      | 0      | 0      |
| Acetobacteraceae    | 1              | 2              | 0      | 0      | 0      | 0      | 0      | 0      | 0      | 0      | 0      | 0      | 0      | 0      | 0      | 0      | 0      | 0      | 0      | 0      |
| Acetobacterium      | 1              | 8              | 0      | 0      | 0      | 0      | 0      | 0      | 0      | 0      | 0      | 1      | 0      | 0      | 0      | 0      | 0      | 0      | 0      | 0      |
| Acetohalobium       | 2              | 79             | 0      | 0      | 0      | 0      | 0      | 0      | 0      | 0      | 0      | 1      | 0      | 0      | 0      | 0      | 0      | 0      | 0      | 0      |
| Acholeplasma        | 2              | 38             | 0      | 0      | 0      | 0      | 0      | 0      | 0      | 0      | 0      | 0      | 0      | 0      | 0      | 0      | 0      | 0      | 0      | 0      |
| Achromobacter       | 2              | 192            | 0      | 0      | 0      | 1      | 0      | 0      | 0      | 0      | 1      | 1      | 0      | 0      | 0      | 0      | 0      | 0      | 0      | 1      |
| Acidaminococcus     | 1              | 65             | 0      | 0      | 0      | 0      | 0      | 0      | 0      | 0      | 0      | 0      | 0      | 0      | 0      | 0      | 0      | 0      | 0      | 0      |
| Acidianus           | 1              | 9              | 0      | 0      | 0      | 0      | 0      | 0      | 0      | 0      | 0      | 1      | 0      | 0      | 0      | 0      | 0      | 0      | 0      | 0      |
| Acidilobus          | 1              | 8              | 0      | 0      | 0      | 0      | 0      | 0      | 0      | 0      | 0      | 0      | 0      | 0      | 0      | 0      | 0      | 0      | 0      | 0      |
| Acidimicrobium      | 2              | 58             | 0      | 0      | 0      | 0      | 0      | 0      | 0      | 0      | 0      | 1      | 0      | 0      | 0      | 0      | 0      | 0      | 0      | 0      |
| Acidiphilium        | 3              | 144            | 0      | 0      | 0      | 0      | 0      | 0      | 0      | 0      | 0      | 1      | 0      | 0      | 0      | 0      | 0      | 0      | 0      | 0      |
| Acidithiobacillus   | 2              | 70             | 0      | 0      | 0      | 0      | 0      | 1      | 0      | 0      | 0      | 1      | 0      | 0      | 0      | 0      | 0      | 0      | 0      | 0      |
| Acidobacterium      | 2              | 91             | 0      | 0      | 0      | 0      | 0      | 0      | 0      | 0      | 0      | 0      | 0      | 0      | 0      | 0      | 0      | 0      | 0      | 0      |
| Acidocella          | 1              | 2              | 0      | 0      | 0      | 0      | 0      | 0      | 0      | 0      | 0      | 0      | 0      | 0      | 0      | 0      | 0      | 0      | 0      | 0      |
| Acidothermus        | 2              | 68             | 0      | 0      | 0      | 0      | 0      | 0      | 0      | 0      | 0      | 1      | 0      | 0      | 0      | 0      | 0      | 0      | 0      | 0      |
| Acidovorax          | 3              | 217            | 0      | 1      | 0      | 1      | 1      | 0      | 0      | 0      | 1      | 1      | 1      | 1      | 1      | 1      | 0      | 0      | 0      | 1      |
| Aciduliprofundum    | 1              | 11             | 0      | 0      | 0      | 0      | 0      | 0      | 0      | 0      | 0      | 0      | 0      | 0      | 0      | 0      | 0      | 0      | 0      | 0      |
| Acinetobacter       | 3              | 188            | 1      | 1      | 0      | 1      | 1      | 0      | 0      | 0      | 1      | 0      | 1      | 0      | 0      | 0      | 0      | 0      | 0      | 0      |
| Actinobacillus      | 2              | 112            | 0      | 0      | 0      | 0      | 0      | 0      | 0      | 0      | 0      | 0      | 0      | 0      | 0      | 0      | 0      | 0      | 0      | 0      |
| Actinomadura        | 1              | 1              | 0      | 0      | 0      | 0      | 0      | 0      | 0      | 0      | 0      | 0      | 0      | 0      | 0      | 0      | 0      | 0      | 0      | 0      |
| Actinoplanes        | 1              | 52             | 1      | 0      | 0      | 0      | 1      | 0      | 0      | 0      | 0      | 1      | 0      | 0      | 0      | 0      | 0      | 0      | 0      | 0      |
| Actinopolyspora     | 1              | 2              | 0      | 0      | 0      | 0      | 0      | 0      | 0      | 0      | 0      | 0      | 0      | 0      | 0      | 0      | 0      | 0      | 0      | 0      |
| Actinosynnema       | 2              | 122            | 1      | 0      | 0      | 0      | 0      | 0      | 0      | 0      | 0      | 0      | 0      | 0      | 0      | 0      | 0      | 0      | 0      | 0      |
| Advenella           | 1              | 30             | 0      | 0      | 0      | 0      | 0      | 0      | 0      | 0      | 1      | 1      | 1      | 0      | 0      | 0      | 0      | 0      | 0      | 1      |
| Aequorivita         | 1              | 12             | 0      | 0      | 0      | 0      | 0      | 0      | 0      | 0      | 0      | 0      | 0      | 0      | 0      | 0      | 0      | 0      | 0      | 0      |
| Aerococcus          | 2              | 57             | 0      | 0      | 0      | 0      | 0      | 0      | 0      | 0      | 0      | 0      | 0      | 0      | 0      | 0      | 0      | 0      | 0      | 0      |
| Aeromonas           | 2              | 127            | 0      | 0      | 0      | 0      | 0      | 0      | 0      | 0      | 0      | 0      | 0      | 0      | 0      | 0      | 0      | 0      | 0      | 0      |
| Aeropyrum           | 1              | 13             | 0      | 0      | 0      | 0      | 0      | 0      | 0      | 0      | 0      | 1      | 0      | 0      | 0      | 0      | 0      | 0      | 0      | 0      |
| Afipia              | 1              | 54             | 0      | 0      | 0      | 0      | 0      | 0      | 0      | 0      | 0      | 1      | 0      | 0      | 0      | 0      | 0      | 0      | 0      | 0      |
| Aggregatibacter     | 1              | 81             | 0      | 0      | 0      | 0      | 0      | 0      | 0      | 0      | 0      | 0      | 0      | 0      | 0      | 0      | 0      | 0      | 0      | 0      |
| Agrobacterium       | 2              | 242            | 1      | 0      | 1      | 1      | 0      | 1      | 0      | 0      | 1      | 1      | 1      | 0      | 0      | 1      | 1      | 0      | 0      | 0      |
| Ahrensia            | 1              | 2              | 0      | 0      | 0      | 0      | 0      | 0      | 0      | 0      | 0      | 0      | 0      | 0      | 0      | 0      | 0      | 0      | 0      | 0      |
| Akkermansia         | 2              | 47             | 0      | 0      | 0      | 0      | 0      | 0      | 0      | 0      | 0      | 0      | 0      | 0      | 0      | 0      | 0      | 0      | 0      | 0      |
| Albidiferax         | 3              | 144            | 1      | 0      | 0      | 0      | 0      | 0      | 0      | 0      | 0      | 0      | 1      | 0      | 0      | 1      | 0      | 0      | 0      | 1      |
| Alcaligenes         | 1              | 21             | 0      | 0      | 0      | 0      | 0      | 0      | 0      | 0      | 0      | 0      | 0      | 0      | 0      | 0      | 0      | 0      | 0      | 0      |
| Alcanivorax         | 2              | 146            | 1      | 0      | 0      | 0      | 1      | 1      | 0      | 1      | 0      | 0      | 1      | 0      | 0      | 0      | 0      | 0      | 0      | 0      |
| Alicyclophilus      | 3              | 152            | 0      | 0      | 0      | 1      | 0      | 0      | 0      | 0      | 1      | 1      | 0      | 0      | 0      | 0      | 0      | 0      | 0      | 0      |
| Alicyclobacillus    | 2              | 91             | 0      | 0      | 0      | 0      | 0      | 0      | 0      | 0      | 0      | 0      | 0      | 0      | 0      | 0      | 0      | 0      | 0      | 0      |
| Aliivibrio          | 2              | 118            | 0      | 0      | 0      | 0      | 0      | 0      | 0      | 0      | 0      | 0      | 0      | 0      | 0      | 0      | 0      | 0      | 0      | 0      |
| Alishewanella       | 1              | 1              | 0      | 0      | 0      | 0      | 0      | 0      | 0      | 0      | 0      | 0      | 0      | 0      | 0      | 0      | 0      | 0      | 0      | 0      |
| Alistipes           | 1              | 52             | 0      | 0      | 0      | 0      | 0      | 0      | 0      | 0      | 0      | 0      | 0      | 0      | 0      | 0      | 0      | 0      | 0      | 0      |
| Alkalilimnicola     | 2              | 97             | 0      | 0      | 0      | 0      | 0      | 0      | 0      | 0      | 0      | 1      | 0      | 0      | 0      | 0      | 0      | 0      | 0      | 0      |
| Alkaliphilus        | 2              | 62             | 0      | 0      | 0      | 0      | 0      | 0      | 0      | 0      | 0      | 1      | 0      | 0      | 0      | 0      | 0      | 0      | 0      | 0      |
| Allochromatium      | 2              | 84             | 0      | 0      | 0      | 0      | 0      | 0      | 0      | 0      | 0      | 0      | 0      | 0      | 0      | 0      | 0      | 0      | 0      | 0      |
| Alphaproteobacteria | 1              | 3              | 0      | 0      | 0      | 0      | 0      | 0      | 0      | 0      | 0      | 0      | 0      | 0      | 0      | 0      | 0      | 0      | 0      | 0      |
| Alteromonadales     | 1              | 12             | 0      | 0      | 0      | 0      | 0      | 0      | 0      | 0      | 0      | 0      | 0      | 0      | 0      | 0      | 0      | 0      | 0      | 0      |
| Alteromonas         | 1              | 37             | 0      | 0      | 0      | 1      | 1      | 0      | 0      | 0      | 1      | 0      | 0      | 0      | 0      | 1      | 0      | 0      | 0      | 0      |
| Aminobacter         | 1              | 4              | 0      | 0      | 0      | 0      | 1      | 0      | 0      | 0      | 0      | 0      | 0      | 0      | 0      | 0      | 0      | 0      | 0      | 0      |
| Aminobacterium      | 2              | 59             | 0      | 0      | 0      | 0      | 0      | 0      | 0      | 0      | 0      | 0      | 0      | 0      | 0      | 0      | 0      | 0      | 0      | 0      |

| Genus            | Cluster Number | Protein Counts | K03333 | K03379 | K03380 | K03381 | K03382 | K03383 | K03384 | K03391 | K03464 | K03518 | K03862 | K04098 | K04099 | K04100 | K04102 | K04105 | K04107 | K04110 |
|------------------|----------------|----------------|--------|--------|--------|--------|--------|--------|--------|--------|--------|--------|--------|--------|--------|--------|--------|--------|--------|--------|
| Ammonifex        | 2              | 50             | 0      | 0      | 0      | 0      | 0      | 0      | 0      | 0      | 0      | 0      | 0      | 0      | 0      | 0      | 0      | 0      | 0      | 0      |
| Amphibacillus    | 1              | 13             | 0      | 0      | 0      | 0      | 0      | 0      | 0      | 0      | 0      | 0      | 0      | 0      | 0      | 0      | 0      | 0      | 0      | 0      |
| Amphritea        | 1              | 2              | 0      | 0      | 0      | 0      | 0      | 0      | 0      | 0      | 0      | 0      | 0      | 0      | 0      | 0      | 0      | 0      | 0      | 0      |
| Amycolatopsis    | 2              | 201            | 1      | 0      | 0      | 1      | 1      | 0      | 0      | 0      | 1      | 1      | 1      | 0      | 0      | 0      | 1      | 0      | 0      | 1      |
| Amycolicoccus    | 1              | 43             | 1      | 0      | 0      | 0      | 1      | 0      | 0      | 0      | 0      | 0      | 1      | 0      | 0      | 0      | 0      | 0      | 0      | 0      |
| Anabaena         | 2              | 92             | 0      | 0      | 0      | 0      | 0      | 0      | 0      | 0      | 1      | 0      | 0      | 0      | 0      | 0      | 0      | 0      | 0      | 0      |
| Anaerobaculum    | 1              | 11             | 0      | 0      | 0      | 0      | 0      | 0      | 0      | 0      | 0      | 1      | 0      | 0      | 0      | 0      | 1      | 0      | 0      | 0      |
| Anaerococcus     | 2              | 46             | 0      | 0      | 0      | 0      | 0      | 0      | 0      | 0      | 0      | 0      | 0      | 0      | 0      | 0      | 0      | 0      | 0      | 0      |
| Anaerolinea      | 2              | 66             | 0      | 0      | 0      | 0      | 1      | 0      | 0      | 0      | 0      | 1      | 0      | 0      | 0      | 0      | 0      | 0      | 0      | 0      |
| Anaeromyxobacter | 3              | 117            | 1      | 0      | 0      | 0      | 0      | 0      | 0      | 0      | 0      | 0      | 0      | 0      | 0      | 0      | 0      | 0      | 0      | 0      |
| Anaerostipes     | 1              | 44             | 0      | 0      | 0      | 0      | 0      | 0      | 0      | 0      | 0      | 1      | 0      | 0      | 0      | 0      | 0      | 0      | 0      | 0      |
| Anaerotruncus    | 1              | 2              | 0      | 0      | 0      | 0      | 0      | 0      | 0      | 0      | 0      | 0      | 0      | 0      | 0      | 0      | 0      | 0      | 0      | 0      |
| Anaplasma        | 1              | 35             | 0      | 0      | 0      | 0      | 0      | 0      | 0      | 0      | 0      | 0      | 0      | 0      | 0      | 0      | 0      | 0      | 0      | 0      |
| Ancylobacter     | 1              | 3              | 0      | 0      | 0      | 0      | 0      | 0      | 0      | 0      | 0      | 0      | 0      | 0      | 0      | 0      | 0      | 0      | 0      | 0      |
| Aneurinibacillus | 1              | 1              | 0      | 0      | 0      | 0      | 0      | 0      | 0      | 0      | 0      | 0      | 0      | 0      | 0      | 0      | 0      | 0      | 0      | 0      |
| Angomonas        | 1              | 1              | 0      | 0      | 0      | 0      | 0      | 0      | 0      | 0      | 0      | 0      | 0      | 0      | 0      | 0      | 0      | 0      | 0      | 0      |
| Anoxybacillus    | 2              | 72             | 0      | 0      | 0      | 0      | 0      | 0      | 0      | 0      | 0      | 0      | 0      | 0      | 0      | 0      | 0      | 0      | 0      | 0      |
| Aquifex          | 2              | 45             | 0      | 0      | 0      | 0      | 0      | 0      | 0      | 0      | 0      | 0      | 0      | 0      | 0      | 0      | 0      | 0      | 0      | 0      |
| Aquimarina       | 1              | 2              | 0      | 0      | 0      | 0      | 0      | 0      | 0      | 0      | 0      | 0      | 0      | 0      | 0      | 0      | 0      | 0      | 0      | 0      |
| Arcanobacterium  | 2              | 45             | 0      | 0      | 0      | 0      | 0      | 0      | 0      | 0      | 0      | 0      | 0      | 0      | 0      | 0      | 0      | 0      | 0      | 0      |
| Archaeoglobus    | 1              | 14             | 0      | 0      | 0      | 0      | 0      | 0      | 0      | 0      | 0      | 0      | 0      | 0      | 0      | 0      | 0      | 0      | 0      | 0      |
| Arcobacter       | 2              | 101            | 0      | 0      | 0      | 0      | 0      | 0      | 0      | 0      | 0      | 0      | 0      | 0      | 0      | 0      | 0      | 0      | 0      | 0      |
| Aromatoleum      | 3              | 133            | 0      | 0      | 0      | 0      | 0      | 0      | 0      | 0      | 0      | 0      | 0      | 0      | 0      | 0      | 0      | 0      | 1      | 1      |
| Arsenophonus     | 1              | 4              | 0      | 0      | 0      | 0      | 0      | 0      | 0      | 0      | 0      | 0      | 0      | 0      | 0      | 0      | 0      | 0      | 0      | 0      |
| Arthrobacter     | 2              | 206            | 1      | 0      | 1      | 1      | 1      | 0      | 0      | 0      | 1      | 1      | 1      | 1      | 1      | 0      | 0      | 0      | 0      | 0      |
| Arthrospira      | 2              | 67             | 0      | 0      | 0      | 0      | 0      | 0      | 0      | 0      | 0      | 0      | 0      | 0      | 0      | 0      | 0      | 0      | 0      | 0      |
| Aster            | 1              | 10             | 0      | 0      | 0      | 0      | 0      | 0      | 0      | 0      | 0      | 0      | 0      | 0      | 0      | 0      | 0      | 0      | 0      | 0      |
| Asticcacaulis    | 2              | 103            | 0      | 0      | 0      | 0      | 0      | 0      | 0      | 0      | 0      | 0      | 0      | 0      | 1      | 0      | 0      | 0      | 0      | 0      |
| Atopobium        | 1              | 28             | 0      | 0      | 0      | 0      | 0      | 0      | 0      | 0      | 0      | 0      | 0      | 0      | 0      | 0      | 0      | 0      | 0      | 0      |
| Aurantimonas     | 1              | 2              | 0      | 0      | 0      | 0      | 0      | 0      | 0      | 0      | 0      | 0      | 0      | 0      | 0      | 0      | 0      | 0      | 0      | 0      |
| Avibacterium     | 1              | 17             | 0      | 0      | 0      | 0      | 0      | 0      | 0      | 0      | 0      | 0      | 0      | 0      | 0      | 0      | 0      | 0      | 0      | 0      |
| Azoarcus         | 3              | 172            | 0      | 0      | 0      | 0      | 0      | 0      | 1      | 0      | 0      | 0      | 0      | 0      | 0      | 1      | 0      | 0      | 0      | 1      |
| Azorhizobium     | 3              | 149            | 0      | 0      | 0      | 0      | 0      | 1      | 0      | 0      | 1      | 1      | 0      | 1      | 0      | 0      | 0      | 0      | 0      | 0      |
| Azorhizophilus   | 1              | 4              | 0      | 0      | 0      | 0      | 0      | 0      | 0      | 0      | 0      | 0      | 0      | 0      | 0      | 0      | 0      | 0      | 0      | 0      |
| Azospira         | 1              | 19             | 0      | 0      | 0      | 0      | 0      | 0      | 0      | 0      | 0      | 0      | 0      | 0      | 0      | 0      | 0      | 0      | 0      | 0      |
| Azospirillum     | 2              | 198            | 0      | 0      | 0      | 1      | 0      | 0      | 0      | 0      | 1      | 1      | 1      | 0      | 0      | 1      | 0      | 0      | 0      | 0      |
| Azotobacter      | 3              | 183            | 0      | 0      | 0      | 0      | 0      | 0      | 0      | 0      | 0      | 0      | 0      | 0      | 1      | 1      | 0      | 0      | 0      | 0      |
| Bacillales       | 1              | 9              | 0      | 0      | 0      | 0      | 0      | 0      | 0      | 0      | 0      | 0      | 0      | 0      | 0      | 0      | 0      | 0      | 0      | 0      |
| Bacilli          | 1              | 3              | 0      | 0      | 0      | 0      | 0      | 0      | 0      | 0      | 0      | 0      | 0      | 0      | 0      | 0      | 0      | 0      | 0      | 0      |
| Bacillus         | 2              | 237            | 0      | 0      | 0      | 0      | 0      | 1      | 0      | 0      | 0      | 1      | 1      | 0      | 0      | 0      | 0      | 0      | 0      | 0      |
| Bacteria         | 2              | 86             | 0      | 0      | 0      | 0      | 1      | 0      | 0      | 0      | 1      | 0      | 0      | 0      | 0      | 0      | 0      | 0      | 0      | 0      |
| Bacteriovorax    | 2              | 98             | 1      | 0      | 0      | 0      | 0      | 0      | 0      | 0      | 0      | 0      | 0      | 0      | 0      | 0      | 0      | 0      | 0      | 0      |
| Bacteroidales    | 2              | 59             | 0      | 0      | 0      | 0      | 0      | 0      | 0      | 0      | 0      | 0      | 0      | 0      | 0      | 0      | 0      | 0      | 0      | 0      |
| Bacteroides      | 2              | 96             | 0      | 0      | 0      | 0      | 0      | 0      | 0      | 0      | 0      | 0      | 0      | 0      | 0      | 0      | 0      | 0      | 0      | 0      |
| Bacteroidetes    | 1              | 2              | 0      | 0      | 0      | 0      | 0      | 0      | 0      | 0      | 0      | 0      | 0      | 0      | 0      | 0      | 0      | 0      | 0      | 0      |
| Bartonella       | 2              | 50             | 0      | 0      | 0      | 0      | 0      | 0      | 0      | 0      | 0      | 0      | 0      | 0      | 0      | 0      | 0      | 0      | 0      | 0      |
| Baumannia        | 2              | 24             | 0      | 0      | 0      | 0      | 0      | 0      | 0      | 0      | 0      | 0      | 0      | 0      | 0      | 0      | 0      | 0      | 0      | 0      |
| Bdellovibrio     | 2              | 87             | 1      | 0      | 0      | 0      | 0      | 0      | 0      | 0      | 0      | 0      | 0      | 0      | 0      | 0      | 0      | 0      | 0      | 0      |
| Beijerinckia     | 3              | 123            | 0      | 0      | 0      | 0      | 0      | 0      | 0      | 0      | 0      | 0      | 0      | 0      | 0      | 0      | 0      | 0      | 0      | 0      |
| Belliella        | 1              | 14             | 0      | 0      | 0      | 0      | 0      | 0      | 0      | 0      | 0      | 0      | 0      | 0      | 0      | 0      | 0      | 0      | 0      | 0      |
| Beutenbergia     | 2              | 82             | 0      | 0      | 0      | 0      | 1      | 0      | 0      | 0      | 0      | 1      | 0      | 0      | 0      | 0      | 0      | 0      | 0      | 0      |
| Bifidobacterium  | 2              | 61             | 0      | 0      | 0      | 0      | 0      | 0      | 0      | 0      | 0      | 0      | 0      | 0      | 0      | 0      | 0      | 0      | 0      | 0      |

| Genus                | Cluster Number | Protein Counts | K03333 | K03379 | K03380 | K03381 | K03382 | K03383 | K03384 | K03391 | K03464 | K03518 | K03862 | K04098 | K04099 | K04100 | K04102 | K04105 | K04107 | K04110 |
|----------------------|----------------|----------------|--------|--------|--------|--------|--------|--------|--------|--------|--------|--------|--------|--------|--------|--------|--------|--------|--------|--------|
| Bizionia             | 1              | 1              | 0      | 0      | 0      | 0      | 0      | 0      | 0      | 0      | 0      | 0      | 0      | 0      | 0      | 0      | 0      | 0      | 0      | 0      |
| Blastococcus         | 1              | 39             | 0      | 0      | 1      | 1      | 0      | 1      | 0      | 0      | 1      | 1      | 0      | 0      | 0      | 1      | 0      | 0      | 0      | 1      |
| Blattabacterium      | 1              | 23             | 0      | 0      | 0      | 0      | 0      | 0      | 0      | 0      | 0      | 0      | 0      | 0      | 0      | 0      | 0      | 0      | 0      | 0      |
| Blautia              | 1              | 22             | 0      | 0      | 0      | 0      | 0      | 0      | 0      | 0      | 0      | 1      | 0      | 0      | 0      | 0      | 0      | 0      | 0      | 0      |
| Bordetella           | 3              | 227            | 0      | 0      | 0      | 1      | 0      | 0      | 1      | 0      | 1      | 1      | 0      | 0      | 0      | 0      | 1      | 0      | 0      | 1      |
| Borrelia             | 1              | 32             | 0      | 0      | 0      | 0      | 0      | 0      | 0      | 0      | 0      | 0      | 0      | 0      | 0      | 0      | 0      | 0      | 0      | 0      |
| Brachybacterium      | 1              | 18             | 0      | 0      | 0      | 0      | 0      | 0      | 0      | 0      | 0      | 0      | 0      | 0      | 0      | 0      | 0      | 0      | 0      | 0      |
| Brachymonas          | 1              | 4              | 0      | 0      | 0      | 0      | 0      | 0      | 0      | 0      | 0      | 0      | 0      | 0      | 0      | 0      | 0      | 0      | 0      | 0      |
| Brachyspira          | 2              | 79             | 0      | 0      | 0      | 0      | 1      | 0      | 0      | 0      | 0      | 1      | 0      | 0      | 0      | 0      | 0      | 0      | 0      | 0      |
| Bradyrhizobiaceae    | 1              | 20             | 0      | 0      | 0      | 0      | 0      | 0      | 0      | 0      | 0      | 1      | 0      | 0      | 0      | 0      | 0      | 0      | 0      | 0      |
| Bradyrhizobium       | 3              | 254            | 0      | 0      | 1      | 1      | 1      | 1      | 1      | 0      | 0      | 1      | 1      | 0      | 1      | 1      | 1      | 1      | 0      | 1      |
| Brenneria            | 1              | 20             | 0      | 0      | 0      | 0      | 0      | 0      | 0      | 0      | 0      | 0      | 0      | 0      | 0      | 0      | 0      | 0      | 0      | 0      |
| Brevibacillus        | 2              | 122            | 0      | 0      | 0      | 0      | 0      | 0      | 0      | 0      | 0      | 0      | 0      | 0      | 0      | 0      | 0      | 0      | 0      | 0      |
| Brevibacterium       | 1              | 4              | 0      | 0      | 0      | 0      | 0      | 0      | 0      | 0      | 0      | 0      | 0      | 0      | 0      | 0      | 0      | 0      | 0      | 0      |
| Brevundimonas        | 2              | 105            | 0      | 0      | 0      | 0      | 0      | 0      | 0      | 0      | 0      | 0      | 0      | 0      | 0      | 1      | 0      | 0      | 0      | 0      |
| Brucella             | 3              | 138            | 0      | 0      | 0      | 0      | 0      | 0      | 0      | 0      | 0      | 0      | 0      | 0      | 0      | 0      | 0      | 0      | 0      | 0      |
| Buchnera             | 1              | 26             | 0      | 0      | 0      | 0      | 0      | 0      | 0      | 0      | 0      | 0      | 0      | 0      | 0      | 0      | 0      | 0      | 0      | 0      |
| Burkholderia         | 3              | 424            | 1      | 1      | 1      | 1      | 1      | 0      | 0      | 1      | 1      | 1      | 1      | 1      | 1      | 1      | 1      | 0      | 0      | 1      |
| Burkholderiaceae     | 3              | 143            | 0      | 0      | 0      | 0      | 0      | 0      | 0      | 0      | 1      | 1      | 0      | 0      | 0      | 0      | 0      | 0      | 0      | 0      |
| Burkholderiales      | 1              | 24             | 0      | 0      | 0      | 0      | 0      | 0      | 0      | 0      | 0      | 0      | 0      | 0      | 0      | 0      | 0      | 0      | 0      | 0      |
| Buttiauxella         | 1              | 2              | 0      | 0      | 0      | 0      | 0      | 0      | 0      | 0      | 0      | 0      | 0      | 0      | 0      | 0      | 0      | 0      | 0      | 0      |
| Butyrivibrio         | 2              | 67             | 0      | 0      | 0      | 0      | 0      | 0      | 0      | 0      | 0      | 0      | 0      | 0      | 0      | 0      | 0      | 0      | 0      | 0      |
| Caldanaerobacter     | 2              | 63             | 0      | 0      | 0      | 0      | 0      | 0      | 0      | 0      | 0      | 0      | 0      | 0      | 0      | 0      | 0      | 0      | 0      | 0      |
| Caldicellulosiruptor | 2              | 75             | 0      | 0      | 0      | 0      | 0      | 0      | 0      | 0      | 0      | 0      | 0      | 0      | 0      | 0      | 0      | 0      | 0      | 0      |
| Caldilinea           | 1              | 23             | 0      | 0      | 0      | 0      | 1      | 0      | 0      | 0      | 0      | 1      | 0      | 0      | 0      | 0      | 0      | 0      | 0      | 0      |
| Caldimonas           | 1              | 6              | 0      | 0      | 0      | 0      | 0      | 0      | 0      | 0      | 0      | 0      | 0      | 0      | 0      | 0      | 0      | 0      | 0      | 0      |
| Caldisericum         | 1              | 10             | 0      | 0      | 0      | 0      | 1      | 0      | 0      | 0      | 0      | 1      | 0      | 0      | 0      | 0      | 0      | 0      | 0      | 0      |
| Caldisphaera         | 1              | 7              | 0      | 0      | 0      | 0      | 0      | 0      | 0      | 0      | 0      | 0      | 0      | 0      | 0      | 0      | 0      | 0      | 0      | 0      |
| Calditerrivibrio     | 2              | 74             | 0      | 0      | 0      | 0      | 0      | 0      | 0      | 0      | 0      | 0      | 0      | 0      | 0      | 0      | 0      | 0      | 0      | 0      |
| Caldivirga           | 1              | 13             | 0      | 0      | 0      | 0      | 0      | 0      | 0      | 0      | 0      | 0      | 0      | 0      | 0      | 0      | 0      | 0      | 0      | 0      |
| Calothrix            | 1              | 43             | 1      | 0      | 0      | 0      | 0      | 0      | 0      | 0      | 0      | 0      | 0      | 0      | 0      | 0      | 0      | 0      | 0      | 0      |
| Calyptogena          | 2              | 34             | 0      | 0      | 0      | 0      | 0      | 0      | 0      | 0      | 0      | 0      | 0      | 0      | 0      | 0      | 0      | 0      | 0      | 0      |
| Campylobacter        | 2              | 80             | 0      | 0      | 0      | 0      | 0      | 0      | 0      | 0      | 0      | 0      | 0      | 0      | 0      | 0      | 0      | 0      | 0      | 0      |
| Candidatus           | 2              | 290            | 1      | 1      | 1      | 0      | 1      | 0      | 0      | 0      | 0      | 1      | 1      | 0      | 0      | 1      | 0      | 0      | 0      | 0      |
| Capnocytophaga       | 1              | 50             | 0      | 0      | 0      | 0      | 0      | 0      | 0      | 0      | 0      | 0      | 0      | 0      | 0      | 0      | 0      | 0      | 0      | 0      |
| Carbophilus          | 1              | 2              | 0      | 0      | 0      | 0      | 0      | 0      | 0      | 0      | 0      | 0      | 0      | 0      | 0      | 0      | 0      | 0      | 0      | 0      |
| Carboxydibrachium    | 1              | 14             | 0      | 0      | 0      | 0      | 0      | 0      | 0      | 0      | 0      | 0      | 0      | 0      | 0      | 0      | 0      | 0      | 0      | 0      |
| Carboxydotherrmus    | 2              | 68             | 0      | 0      | 0      | 0      | 0      | 0      | 0      | 0      | 0      | 1      | 0      | 0      | 0      | 0      | 0      | 0      | 0      | 0      |
| Carica               | 1              | 2              | 0      | 0      | 0      | 0      | 0      | 0      | 0      | 0      | 0      | 0      | 0      | 0      | 0      | 0      | 0      | 0      | 0      | 0      |
| Carnobacterium       | 2              | 71             | 0      | 0      | 0      | 0      | 0      | 0      | 0      | 0      | 0      | 0      | 0      | 0      | 0      | 0      | 0      | 0      | 0      | 0      |
| Catenibacterium      | 1              | 2              | 0      | 0      | 0      | 0      | 0      | 0      | 0      | 0      | 0      | 0      | 0      | 0      | 0      | 0      | 0      | 0      | 0      | 0      |
| Catenovulum          | 1              | 2              | 0      | 0      | 0      | 0      | 0      | 0      | 0      | 0      | 0      | 0      | 0      | 0      | 0      | 0      | 0      | 0      | 0      | 0      |
| Catenulispora        | 3              | 159            | 1      | 0      | 0      | 0      | 1      | 1      | 0      | 0      | 0      | 1      | 1      | 1      | 0      | 0      | 1      | 0      | 0      | 0      |
| Caulobacter          | 3              | 168            | 0      | 0      | 0      | 0      | 0      | 0      | 0      | 0      | 0      | 0      | 1      | 0      | 0      | 0      | 0      | 0      | 0      | 0      |
| Cedecea              | 1              | 45             | 0      | 0      | 0      | 0      | 0      | 0      | 0      | 0      | 0      | 0      | 0      | 0      | 0      | 0      | 0      | 0      | 0      | 0      |
| Cellulomonas         | 2              | 96             | 1      | 0      | 1      | 0      | 0      | 0      | 0      | 0      | 0      | 0      | 0      | 0      | 0      | 0      | 0      | 0      | 0      | 0      |
| Cellulophaga         | 2              | 105            | 0      | 0      | 0      | 0      | 0      | 0      | 0      | 0      | 0      | 0      | 0      | 0      | 0      | 0      | 0      | 0      | 0      | 0      |
| Cellulosilyticum     | 1              | 14             | 0      | 0      | 0      | 0      | 0      | 0      | 0      | 0      | 0      | 0      | 0      | 0      | 0      | 0      | 0      | 0      | 0      | 0      |
| Cellvibrio           | 2              | 85             | 1      | 0      | 0      | 0      | 1      | 0      | 0      | 0      | 0      | 0      | 0      | 0      | 0      | 0      | 0      | 0      | 0      | 0      |
| Cenarchaeum          | 1              | 7              | 0      | 0      | 0      | 0      | 0      | 0      | 0      | 0      | 0      | 0      | 0      | 0      | 0      | 0      | 0      | 0      | 0      | 0      |
| Chamaesiphon         | 1              | 13             | 0      | 0      | 0      | 0      | 0      | 0      | 0      | 0      | 0      | 0      | 0      | 0      | 0      | 0      | 0      | 0      | 0      | 0      |
| Chelativorans        | 3              | 136            | 0      | 0      | 0      | 0      | 0      | 0      | 0      | 0      | 0      | 1      | 0      | 0      | 0      | 0      | 1      | 0      | 0      | 0      |



| Genus                  | Cluster Number | Protein Counts | K03333 | K03379 | K03380 | K03381 | K03382 | K03383 | K03384 | K03391 | K03464 | K03518 | K03862 | K04098 | K04099 | K04100 | K04102 | K04105 | K04107 | K04110 |
|------------------------|----------------|----------------|--------|--------|--------|--------|--------|--------|--------|--------|--------|--------|--------|--------|--------|--------|--------|--------|--------|--------|
| Chelatococcus          | 1              | 2              | 0      | 0      | 0      | 0      | 0      | 0      | 0      | 0      | 0      | 0      | 0      | 0      | 0      | 0      | 0      | 0      | 0      | 0      |
| Chitinophaga           | 2              | 98             | 0      | 0      | 0      | 0      | 0      | 0      | 0      | 0      | 0      | 0      | 0      | 0      | 0      | 0      | 0      | 0      | 0      | 0      |
| Chlamydia              | 1              | 36             | 0      | 0      | 0      | 0      | 0      | 0      | 0      | 0      | 0      | 0      | 0      | 0      | 0      | 0      | 0      | 0      | 0      | 0      |
| Chlamydomonas          | 1              | 3              | 0      | 0      | 0      | 0      | 0      | 0      | 0      | 0      | 0      | 0      | 0      | 0      | 0      | 0      | 0      | 0      | 0      | 0      |
| Chlamydomphila         | 1              | 31             | 0      | 0      | 0      | 0      | 0      | 0      | 0      | 0      | 0      | 0      | 0      | 0      | 0      | 0      | 0      | 0      | 0      | 0      |
| Chlorobaculum          | 2              | 61             | 0      | 0      | 0      | 0      | 0      | 0      | 0      | 0      | 0      | 0      | 0      | 0      | 0      | 0      | 0      | 0      | 0      | 0      |
| Chlorobium             | 2              | 89             | 0      | 0      | 0      | 0      | 0      | 0      | 0      | 0      | 0      | 0      | 0      | 0      | 0      | 0      | 0      | 0      | 0      | 0      |
| Chlorobium/Pelodictyon | 1              | 2              | 0      | 0      | 0      | 0      | 0      | 0      | 0      | 0      | 0      | 0      | 0      | 0      | 0      | 0      | 0      | 0      | 0      | 0      |
| Chloroflexus           | 2              | 105            | 0      | 0      | 0      | 0      | 0      | 0      | 0      | 0      | 0      | 1      | 0      | 0      | 0      | 0      | 0      | 0      | 0      | 0      |
| Chlorogloeopsis        | 1              | 9              | 0      | 0      | 0      | 0      | 0      | 0      | 0      | 0      | 0      | 0      | 0      | 0      | 0      | 0      | 0      | 0      | 0      | 0      |
| Chloroherpeton         | 2              | 59             | 0      | 0      | 0      | 0      | 0      | 0      | 0      | 0      | 0      | 0      | 0      | 0      | 0      | 0      | 0      | 0      | 0      | 0      |
| Chromobacterium        | 2              | 117            | 1      | 0      | 0      | 0      | 0      | 0      | 0      | 0      | 0      | 0      | 0      | 0      | 0      | 0      | 0      | 0      | 0      | 0      |
| Chromohalobacter       | 2              | 145            | 0      | 0      | 0      | 0      | 0      | 0      | 0      | 0      | 0      | 0      | 1      | 0      | 1      | 1      | 0      | 0      | 0      | 0      |
| Chroococciopsis        | 1              | 24             | 1      | 0      | 0      | 0      | 1      | 0      | 0      | 0      | 0      | 1      | 0      | 0      | 0      | 0      | 0      | 0      | 0      | 0      |
| Chryseobacterium       | 2              | 104            | 0      | 0      | 0      | 1      | 0      | 0      | 0      | 0      | 0      | 1      | 1      | 0      | 0      | 1      | 0      | 0      | 0      | 1      |
| Citricella             | 1              | 13             | 0      | 0      | 0      | 0      | 0      | 0      | 0      | 0      | 0      | 0      | 0      | 0      | 0      | 0      | 0      | 0      | 0      | 0      |
| Citrobacter            | 2              | 190            | 0      | 0      | 0      | 0      | 0      | 0      | 0      | 0      | 0      | 1      | 0      | 0      | 1      | 0      | 0      | 0      | 0      | 0      |
| Clavibacter            | 2              | 83             | 0      | 0      | 0      | 0      | 0      | 0      | 0      | 0      | 0      | 0      | 0      | 0      | 0      | 0      | 0      | 0      | 0      | 0      |
| Clonorchis             | 1              | 1              | 0      | 0      | 0      | 0      | 0      | 0      | 0      | 0      | 0      | 0      | 0      | 0      | 0      | 0      | 0      | 0      | 0      | 0      |
| Clostridiales          | 2              | 77             | 0      | 0      | 0      | 0      | 0      | 0      | 0      | 0      | 0      | 1      | 0      | 0      | 0      | 0      | 0      | 0      | 0      | 0      |
| Clostridium            | 2              | 191            | 0      | 0      | 0      | 0      | 1      | 0      | 0      | 0      | 0      | 1      | 0      | 0      | 0      | 0      | 0      | 0      | 0      | 0      |
| Cohnella               | 1              | 2              | 0      | 0      | 0      | 0      | 0      | 0      | 0      | 0      | 0      | 0      | 0      | 0      | 0      | 0      | 0      | 0      | 0      | 0      |
| Coleofasciculus        | 1              | 4              | 0      | 0      | 0      | 0      | 0      | 0      | 0      | 0      | 0      | 0      | 0      | 0      | 0      | 0      | 0      | 0      | 0      | 0      |
| Collimonas             | 1              | 35             | 0      | 0      | 0      | 0      | 1      | 0      | 0      | 0      | 0      | 0      | 1      | 0      | 0      | 0      | 0      | 0      | 0      | 0      |
| Colwellia              | 2              | 130            | 0      | 0      | 0      | 0      | 0      | 0      | 0      | 0      | 0      | 0      | 0      | 0      | 0      | 0      | 0      | 0      | 0      | 0      |
| Comamonas              | 2              | 196            | 0      | 0      | 1      | 0      | 1      | 0      | 0      | 0      | 0      | 1      | 1      | 0      | 0      | 1      | 1      | 0      | 0      | 1      |
| Conexibacter           | 3              | 117            | 1      | 0      | 0      | 0      | 1      | 0      | 0      | 0      | 1      | 1      | 0      | 0      | 0      | 0      | 0      | 0      | 0      | 0      |
| Coprobacillus          | 1              | 2              | 0      | 0      | 0      | 0      | 0      | 0      | 0      | 0      | 0      | 0      | 0      | 0      | 0      | 0      | 0      | 0      | 0      | 0      |
| Coprococcus            | 2              | 76             | 0      | 0      | 0      | 0      | 0      | 0      | 0      | 0      | 0      | 1      | 0      | 0      | 0      | 0      | 0      | 0      | 0      | 0      |
| Coprothermobacter      | 2              | 45             | 0      | 0      | 0      | 0      | 0      | 0      | 0      | 0      | 0      | 0      | 0      | 0      | 0      | 0      | 0      | 0      | 0      | 0      |
| Coralimargarita        | 2              | 68             | 0      | 0      | 0      | 0      | 0      | 0      | 0      | 0      | 0      | 0      | 0      | 0      | 0      | 0      | 1      | 0      | 0      | 0      |
| Corallococcus          | 1              | 29             | 1      | 0      | 0      | 0      | 0      | 0      | 0      | 0      | 0      | 0      | 0      | 0      | 0      | 0      | 0      | 0      | 0      | 0      |
| Coriobacterium         | 2              | 36             | 0      | 0      | 0      | 0      | 0      | 0      | 0      | 0      | 0      | 0      | 0      | 0      | 0      | 0      | 0      | 0      | 0      | 0      |
| Corynebacterineae      | 1              | 5              | 0      | 0      | 0      | 0      | 0      | 0      | 0      | 0      | 0      | 0      | 0      | 0      | 0      | 0      | 0      | 0      | 0      | 0      |
| Corynebacterium        | 2              | 175            | 1      | 0      | 1      | 1      | 1      | 0      | 0      | 0      | 1      | 0      | 1      | 1      | 0      | 0      | 0      | 0      | 0      | 0      |
| Coxiella               | 2              | 54             | 0      | 0      | 0      | 0      | 0      | 0      | 0      | 0      | 0      | 0      | 0      | 0      | 0      | 0      | 0      | 0      | 0      | 0      |
| Crinalium              | 1              | 21             | 0      | 0      | 0      | 0      | 0      | 0      | 0      | 0      | 0      | 0      | 0      | 0      | 0      | 0      | 0      | 0      | 0      | 0      |
| Croceibacter           | 2              | 80             | 0      | 0      | 0      | 0      | 0      | 0      | 0      | 0      | 0      | 0      | 0      | 0      | 0      | 0      | 0      | 0      | 0      | 0      |
| Crocospaera            | 1              | 6              | 0      | 0      | 0      | 0      | 0      | 0      | 0      | 0      | 1      | 0      | 0      | 0      | 0      | 0      | 0      | 0      | 0      | 0      |
| Cronobacter            | 2              | 120            | 0      | 0      | 0      | 0      | 0      | 0      | 0      | 0      | 0      | 0      | 0      | 0      | 0      | 0      | 0      | 0      | 0      | 0      |
| Cryptobacterium        | 2              | 39             | 0      | 0      | 0      | 0      | 0      | 0      | 0      | 0      | 0      | 0      | 0      | 0      | 0      | 0      | 0      | 0      | 0      | 0      |
| Cucumis                | 1              | 9              | 0      | 0      | 0      | 0      | 0      | 0      | 0      | 0      | 0      | 0      | 0      | 0      | 0      | 0      | 0      | 0      | 0      | 0      |
| Cupriavidus            | 3              | 317            | 1      | 1      | 0      | 1      | 1      | 0      | 0      | 0      | 1      | 1      | 1      | 1      | 1      | 0      | 1      | 0      | 0      | 1      |
| Curtobacterium         | 1              | 5              | 0      | 0      | 0      | 0      | 0      | 0      | 0      | 0      | 0      | 0      | 0      | 0      | 0      | 0      | 0      | 0      | 0      | 0      |
| Curvibacter            | 1              | 27             | 0      | 0      | 0      | 0      | 0      | 0      | 0      | 0      | 0      | 0      | 0      | 0      | 0      | 0      | 0      | 0      | 0      | 0      |
| Cyanobacterium         | 1              | 9              | 0      | 0      | 0      | 0      | 0      | 0      | 0      | 0      | 0      | 0      | 0      | 0      | 0      | 0      | 0      | 0      | 0      | 0      |
| Cyanobium              | 1              | 10             | 0      | 0      | 0      | 0      | 0      | 0      | 0      | 0      | 0      | 0      | 0      | 0      | 0      | 0      | 0      | 0      | 0      | 0      |
| Cyanothece             | 1              | 34             | 0      | 0      | 0      | 0      | 0      | 0      | 0      | 0      | 1      | 1      | 0      | 0      | 0      | 0      | 0      | 0      | 0      | 0      |
| Cyclobacterium         | 1              | 19             | 1      | 0      | 0      | 0      | 0      | 0      | 0      | 0      | 0      | 0      | 0      | 0      | 0      | 0      | 0      | 0      | 0      | 0      |
| Cycloclasticus         | 1              | 21             | 0      | 0      | 0      | 0      | 0      | 0      | 0      | 0      | 0      | 0      | 0      | 0      | 0      | 0      | 0      | 0      | 0      | 0      |
| Cylindrospermopsis     | 1              | 4              | 0      | 0      | 0      | 0      | 0      | 0      | 0      | 0      | 0      | 0      | 0      | 0      | 0      | 0      | 0      | 0      | 0      | 0      |
| Cylindrospermum        | 1              | 30             | 0      | 0      | 0      | 0      | 0      | 0      | 0      | 0      | 0      | 0      | 0      | 0      | 0      | 0      | 0      | 0      | 0      | 0      |

| Genus              | Cluster Number | Protein Counts | K03333 | K03379 | K03380 | K03381 | K03382 | K03383 | K03384 | K03391 | K03464 | K03518 | K03862 | K04098 | K04099 | K04100 | K04102 | K04105 | K04107 | K04110 |
|--------------------|----------------|----------------|--------|--------|--------|--------|--------|--------|--------|--------|--------|--------|--------|--------|--------|--------|--------|--------|--------|--------|
| Cytophaga          | 2              | 69             | 0      | 0      | 0      | 0      | 0      | 0      | 0      | 0      | 0      | 0      | 0      | 0      | 0      | 0      | 0      | 0      | 0      | 0      |
| Dactylococcopsis   | 1              | 8              | 0      | 0      | 0      | 0      | 1      | 0      | 0      | 0      | 0      | 0      | 0      | 0      | 0      | 0      | 0      | 0      | 0      | 0      |
| Dechloromonas      | 1              | 40             | 0      | 0      | 0      | 0      | 0      | 0      | 0      | 0      | 0      | 0      | 0      | 0      | 0      | 1      | 0      | 0      | 0      | 0      |
| Dechlorosoma       | 1              | 19             | 0      | 0      | 0      | 0      | 0      | 0      | 0      | 0      | 0      | 0      | 0      | 0      | 0      | 0      | 0      | 0      | 0      | 0      |
| Deferribacter      | 2              | 73             | 0      | 0      | 0      | 0      | 0      | 0      | 0      | 0      | 0      | 0      | 0      | 0      | 0      | 0      | 0      | 0      | 0      | 0      |
| Dehalobacter       | 1              | 9              | 0      | 0      | 0      | 0      | 0      | 0      | 0      | 0      | 0      | 0      | 0      | 0      | 0      | 0      | 0      | 0      | 0      | 0      |
| Dehalococcoides    | 2              | 41             | 0      | 0      | 0      | 0      | 0      | 0      | 0      | 0      | 0      | 0      | 0      | 0      | 0      | 0      | 0      | 0      | 0      | 0      |
| Dehalogenimonas    | 1              | 37             | 0      | 0      | 0      | 0      | 0      | 0      | 0      | 0      | 0      | 0      | 0      | 0      | 0      | 0      | 0      | 0      | 0      | 0      |
| Deinococcus        | 2              | 140            | 0      | 0      | 0      | 0      | 0      | 0      | 0      | 0      | 0      | 1      | 0      | 0      | 0      | 0      | 0      | 0      | 0      | 0      |
| Delftia            | 3              | 177            | 0      | 0      | 0      | 1      | 1      | 0      | 0      | 0      | 1      | 1      | 1      | 0      | 0      | 1      | 1      | 0      | 0      | 1      |
| Denitrovibrio      | 2              | 67             | 0      | 0      | 0      | 0      | 0      | 0      | 0      | 0      | 0      | 1      | 0      | 0      | 0      | 0      | 0      | 0      | 0      | 0      |
| Desulfarculus      | 2              | 92             | 0      | 0      | 0      | 0      | 0      | 0      | 0      | 0      | 0      | 1      | 0      | 0      | 0      | 0      | 0      | 0      | 0      | 0      |
| Desulfatibacillum  | 3              | 84             | 1      | 0      | 0      | 0      | 0      | 0      | 0      | 0      | 0      | 0      | 0      | 0      | 0      | 0      | 0      | 0      | 0      | 0      |
| Desulfitobacterium | 2              | 102            | 0      | 0      | 0      | 0      | 0      | 0      | 0      | 0      | 0      | 1      | 0      | 0      | 0      | 0      | 0      | 0      | 0      | 0      |
| Desulfobacca       | 2              | 65             | 0      | 0      | 0      | 0      | 0      | 0      | 0      | 0      | 0      | 0      | 0      | 0      | 0      | 0      | 0      | 0      | 0      | 0      |
| Desulfobacterium   | 2              | 113            | 0      | 0      | 0      | 0      | 0      | 0      | 0      | 0      | 0      | 1      | 0      | 0      | 0      | 0      | 0      | 0      | 0      | 0      |
| Desulfobacula      | 1              | 21             | 0      | 0      | 0      | 0      | 0      | 0      | 0      | 0      | 0      | 1      | 0      | 0      | 0      | 0      | 0      | 0      | 0      | 1      |
| Desulfobulbus      | 2              | 88             | 0      | 0      | 0      | 0      | 0      | 0      | 0      | 0      | 0      | 1      | 0      | 0      | 0      | 0      | 0      | 0      | 0      | 1      |
| Desulfocapsa       | 1              | 9              | 0      | 0      | 0      | 0      | 0      | 0      | 0      | 0      | 0      | 0      | 0      | 0      | 0      | 0      | 0      | 0      | 0      | 0      |
| Desulfococcus      | 2              | 80             | 0      | 0      | 0      | 0      | 0      | 0      | 0      | 0      | 0      | 0      | 0      | 0      | 0      | 0      | 0      | 0      | 0      | 0      |
| Desulfohalobium    | 2              | 52             | 0      | 0      | 0      | 0      | 0      | 0      | 0      | 0      | 0      | 0      | 0      | 0      | 0      | 0      | 0      | 0      | 0      | 0      |
| Desulfomicrobium   | 2              | 65             | 0      | 0      | 0      | 0      | 0      | 0      | 0      | 0      | 0      | 0      | 0      | 0      | 0      | 0      | 0      | 0      | 0      | 0      |
| Desulfomonile      | 1              | 25             | 0      | 0      | 0      | 0      | 0      | 0      | 0      | 0      | 0      | 1      | 0      | 0      | 0      | 0      | 0      | 0      | 0      | 1      |
| Desulforhabdus     | 1              | 2              | 0      | 0      | 0      | 0      | 0      | 0      | 0      | 0      | 0      | 0      | 0      | 0      | 0      | 0      | 0      | 0      | 0      | 0      |
| Desulfosporosinus  | 1              | 30             | 0      | 0      | 0      | 0      | 1      | 0      | 0      | 0      | 1      | 1      | 0      | 0      | 0      | 0      | 0      | 0      | 0      | 0      |
| Desulfotalea       | 2              | 66             | 0      | 0      | 0      | 0      | 0      | 0      | 0      | 0      | 0      | 1      | 0      | 0      | 0      | 0      | 0      | 0      | 0      | 0      |
| Desulfotomaculum   | 2              | 98             | 0      | 0      | 0      | 0      | 0      | 0      | 0      | 0      | 0      | 1      | 0      | 0      | 0      | 0      | 0      | 0      | 0      | 1      |
| Desulfovibrio      | 2              | 144            | 0      | 0      | 0      | 0      | 0      | 0      | 0      | 0      | 0      | 1      | 0      | 0      | 0      | 0      | 0      | 0      | 0      | 1      |
| Desulfurispirillum | 2              | 78             | 0      | 0      | 0      | 0      | 0      | 0      | 0      | 0      | 0      | 0      | 0      | 0      | 0      | 0      | 0      | 0      | 0      | 0      |
| Desulfurivibrio    | 2              | 71             | 0      | 0      | 0      | 0      | 0      | 0      | 0      | 0      | 0      | 0      | 0      | 0      | 0      | 0      | 0      | 0      | 0      | 0      |
| Desulfurobacterium | 2              | 53             | 0      | 0      | 0      | 0      | 0      | 0      | 0      | 0      | 0      | 0      | 0      | 0      | 0      | 0      | 0      | 0      | 0      | 0      |
| Desulfurococcus    | 1              | 11             | 0      | 0      | 0      | 0      | 0      | 0      | 0      | 0      | 0      | 1      | 0      | 0      | 0      | 0      | 0      | 0      | 0      | 0      |
| Diaphorobacter     | 1              | 16             | 0      | 0      | 0      | 0      | 0      | 0      | 0      | 0      | 0      | 0      | 0      | 0      | 0      | 0      | 0      | 0      | 0      | 0      |
| Dichelobacter      | 2              | 45             | 0      | 0      | 0      | 0      | 0      | 0      | 0      | 0      | 0      | 0      | 0      | 0      | 0      | 0      | 0      | 0      | 0      | 0      |
| Dickeya            | 2              | 155            | 0      | 0      | 0      | 0      | 0      | 0      | 0      | 0      | 0      | 0      | 1      | 0      | 0      | 0      | 0      | 0      | 0      | 0      |
| Dictyoglomus       | 2              | 62             | 0      | 0      | 0      | 0      | 0      | 0      | 0      | 0      | 0      | 0      | 0      | 0      | 0      | 0      | 0      | 0      | 0      | 0      |
| Dinoroseobacter    | 3              | 148            | 0      | 0      | 0      | 1      | 1      | 0      | 0      | 0      | 0      | 1      | 0      | 0      | 0      | 0      | 1      | 0      | 0      | 0      |
| Dokdonia           | 1              | 3              | 0      | 0      | 0      | 0      | 0      | 0      | 0      | 0      | 0      | 0      | 0      | 0      | 0      | 0      | 0      | 0      | 0      | 0      |
| Dorea              | 1              | 7              | 0      | 0      | 0      | 0      | 0      | 0      | 0      | 0      | 0      | 0      | 0      | 0      | 0      | 0      | 0      | 0      | 0      | 0      |
| Dyadobacter        | 2              | 83             | 0      | 0      | 0      | 0      | 0      | 0      | 0      | 0      | 0      | 0      | 0      | 0      | 0      | 0      | 0      | 0      | 0      | 0      |
| Echinicola         | 1              | 20             | 0      | 0      | 0      | 0      | 0      | 0      | 0      | 0      | 0      | 0      | 0      | 0      | 0      | 0      | 0      | 0      | 0      | 0      |
| Edwardsiella       | 2              | 126            | 0      | 0      | 0      | 0      | 1      | 0      | 0      | 0      | 0      | 0      | 0      | 0      | 0      | 0      | 0      | 0      | 0      | 0      |
| Eggerthella        | 1              | 51             | 0      | 0      | 0      | 0      | 0      | 0      | 0      | 0      | 0      | 0      | 0      | 0      | 0      | 0      | 0      | 0      | 0      | 0      |
| Ehrlichia          | 2              | 37             | 0      | 0      | 0      | 0      | 0      | 0      | 0      | 0      | 0      | 0      | 0      | 0      | 0      | 0      | 0      | 0      | 0      | 0      |
| Eikenella          | 1              | 4              | 0      | 0      | 0      | 0      | 0      | 0      | 0      | 0      | 0      | 0      | 0      | 0      | 0      | 0      | 0      | 0      | 0      | 0      |
| Elusimicrobium     | 2              | 44             | 0      | 0      | 0      | 0      | 0      | 0      | 0      | 0      | 0      | 0      | 0      | 0      | 0      | 0      | 0      | 0      | 0      | 0      |
| Emticicia          | 1              | 21             | 0      | 0      | 0      | 0      | 0      | 0      | 0      | 0      | 1      | 0      | 0      | 0      | 0      | 0      | 0      | 0      | 0      | 0      |
| Enhydrobacter      | 1              | 1              | 0      | 0      | 0      | 0      | 0      | 0      | 0      | 0      | 0      | 0      | 0      | 0      | 0      | 0      | 0      | 0      | 0      | 0      |
| Ensifer            | 1              | 2              | 0      | 0      | 0      | 0      | 0      | 0      | 0      | 0      | 0      | 0      | 0      | 0      | 0      | 0      | 0      | 0      | 0      | 0      |
| Enterobacter       | 2              | 202            | 0      | 0      | 0      | 1      | 0      | 0      | 0      | 0      | 1      | 1      | 1      | 0      | 0      | 0      | 0      | 0      | 0      | 0      |
| Enterobacteriaceae | 2              | 211            | 0      | 0      | 0      | 1      | 0      | 0      | 0      | 0      | 1      | 1      | 0      | 0      | 1      | 0      | 0      | 0      | 0      | 0      |
| Enterococcus       | 1              | 187            | 0      | 0      | 0      | 1      | 1      | 0      | 0      | 0      | 1      | 0      | 1      | 0      | 1      | 0      | 0      | 0      | 0      | 0      |

| Genus               | Cluster Number | Protein Counts | K03333 | K03379 | K03380 | K03381 | K03382 | K03383 | K03384 | K03391 | K03464 | K03518 | K03862 | K04098 | K04099 | K04100 | K04102 | K04105 | K04107 | K04110 |
|---------------------|----------------|----------------|--------|--------|--------|--------|--------|--------|--------|--------|--------|--------|--------|--------|--------|--------|--------|--------|--------|--------|
| Enterovibrio        | 1              | 15             | 0      | 0      | 0      | 0      | 0      | 0      | 0      | 0      | 0      | 0      | 0      | 0      | 0      | 0      | 0      | 0      | 0      | 0      |
| Erwinia             | 2              | 151            | 0      | 0      | 0      | 0      | 1      | 0      | 0      | 0      | 0      | 0      | 1      | 0      | 1      | 0      | 1      | 0      | 0      | 0      |
| Erysipelothrix      | 1              | 9              | 0      | 0      | 0      | 0      | 0      | 0      | 0      | 0      | 0      | 0      | 0      | 0      | 0      | 0      | 0      | 0      | 0      | 0      |
| Erysipelotrichaceae | 1              | 4              | 0      | 0      | 0      | 0      | 0      | 0      | 0      | 0      | 0      | 0      | 0      | 0      | 0      | 0      | 0      | 0      | 0      | 0      |
| Erythrobacter       | 2              | 80             | 0      | 0      | 0      | 0      | 0      | 0      | 0      | 0      | 0      | 0      | 0      | 0      | 0      | 0      | 0      | 0      | 0      | 0      |
| Escherichia         | 2              | 242            | 0      | 0      | 0      | 1      | 1      | 0      | 0      | 0      | 1      | 0      | 0      | 0      | 1      | 0      | 0      | 0      | 0      | 0      |
| Ethanoligenens      | 2              | 69             | 0      | 0      | 0      | 0      | 0      | 0      | 0      | 0      | 0      | 0      | 0      | 0      | 0      | 0      | 0      | 0      | 0      | 0      |
| Eubacteriaceae      | 1              | 2              | 0      | 0      | 0      | 0      | 0      | 0      | 0      | 0      | 0      | 0      | 0      | 0      | 0      | 0      | 0      | 0      | 0      | 0      |
| Eubacterium         | 2              | 103            | 0      | 0      | 0      | 0      | 0      | 0      | 0      | 0      | 0      | 1      | 0      | 0      | 0      | 0      | 0      | 0      | 0      | 0      |
| Eudoraea            | 1              | 4              | 0      | 0      | 0      | 0      | 0      | 0      | 0      | 0      | 0      | 0      | 0      | 0      | 0      | 0      | 0      | 0      | 0      | 0      |
| Euryarchaeota       | 1              | 1              | 0      | 0      | 0      | 0      | 0      | 0      | 0      | 0      | 0      | 0      | 0      | 0      | 0      | 0      | 0      | 0      | 0      | 0      |
| Exiguobacterium     | 2              | 93             | 0      | 0      | 0      | 0      | 0      | 0      | 0      | 0      | 0      | 0      | 0      | 0      | 0      | 0      | 0      | 0      | 0      | 0      |
| Faecalibacterium    | 1              | 12             | 0      | 0      | 0      | 0      | 0      | 0      | 0      | 0      | 0      | 1      | 0      | 0      | 0      | 0      | 0      | 0      | 0      | 0      |
| Ferrimonas          | 2              | 115            | 0      | 0      | 0      | 0      | 0      | 0      | 0      | 0      | 0      | 0      | 0      | 0      | 0      | 0      | 0      | 0      | 0      | 0      |
| Ferroglobus         | 1              | 14             | 0      | 0      | 0      | 0      | 0      | 0      | 0      | 0      | 0      | 0      | 0      | 0      | 0      | 0      | 0      | 0      | 0      | 0      |
| Ferroplasma         | 1              | 11             | 0      | 0      | 0      | 0      | 0      | 0      | 0      | 0      | 0      | 1      | 0      | 0      | 0      | 0      | 0      | 0      | 0      | 0      |
| Fervidicoccus       | 1              | 7              | 0      | 0      | 0      | 0      | 0      | 0      | 0      | 0      | 0      | 1      | 0      | 0      | 0      | 0      | 0      | 0      | 0      | 0      |
| Fervidobacterium    | 2              | 54             | 0      | 0      | 0      | 0      | 0      | 0      | 0      | 0      | 0      | 0      | 0      | 0      | 0      | 0      | 0      | 0      | 0      | 0      |
| Fibrella            | 1              | 17             | 0      | 0      | 0      | 0      | 0      | 0      | 0      | 0      | 0      | 1      | 0      | 0      | 0      | 0      | 0      | 0      | 0      | 0      |
| Fibroacter          | 2              | 52             | 0      | 0      | 0      | 0      | 0      | 0      | 0      | 0      | 0      | 0      | 0      | 0      | 0      | 0      | 0      | 0      | 0      | 0      |
| Filifactor          | 1              | 9              | 0      | 0      | 0      | 0      | 0      | 0      | 0      | 0      | 0      | 0      | 0      | 0      | 0      | 0      | 0      | 0      | 0      | 0      |
| Finegoldia          | 2              | 55             | 0      | 0      | 0      | 0      | 0      | 0      | 0      | 0      | 0      | 1      | 0      | 0      | 0      | 0      | 0      | 0      | 0      | 0      |
| Firmicutes          | 1              | 15             | 0      | 0      | 0      | 0      | 0      | 0      | 0      | 0      | 0      | 0      | 0      | 0      | 0      | 0      | 0      | 0      | 0      | 0      |
| Fischerella         | 1              | 15             | 0      | 0      | 0      | 0      | 0      | 0      | 0      | 0      | 0      | 0      | 0      | 0      | 0      | 0      | 0      | 0      | 0      | 0      |
| Flavobacteria       | 1              | 7              | 0      | 0      | 0      | 0      | 0      | 0      | 0      | 0      | 0      | 0      | 0      | 0      | 0      | 0      | 0      | 0      | 0      | 0      |
| Flavobacteriaceae   | 2              | 69             | 0      | 0      | 0      | 0      | 0      | 0      | 0      | 0      | 0      | 0      | 0      | 0      | 0      | 0      | 0      | 0      | 0      | 0      |
| Flavobacteriales    | 1              | 3              | 0      | 0      | 0      | 0      | 0      | 0      | 0      | 0      | 0      | 0      | 0      | 0      | 0      | 0      | 0      | 0      | 0      | 0      |
| Flavobacterium      | 2              | 103            | 0      | 0      | 0      | 0      | 0      | 0      | 0      | 0      | 0      | 0      | 0      | 0      | 0      | 0      | 0      | 0      | 0      | 0      |
| Flexibacter         | 1              | 17             | 1      | 0      | 0      | 0      | 0      | 0      | 0      | 0      | 0      | 0      | 0      | 0      | 0      | 0      | 0      | 0      | 0      | 0      |
| Flexistipes         | 1              | 11             | 0      | 0      | 0      | 0      | 0      | 0      | 0      | 0      | 0      | 0      | 0      | 0      | 0      | 0      | 0      | 0      | 0      | 0      |
| Fluoribacter        | 1              | 6              | 0      | 0      | 0      | 0      | 0      | 0      | 0      | 0      | 0      | 0      | 0      | 0      | 0      | 0      | 0      | 0      | 0      | 0      |
| Fluviicola          | 2              | 69             | 0      | 0      | 0      | 0      | 0      | 0      | 0      | 0      | 0      | 0      | 0      | 0      | 0      | 0      | 0      | 0      | 0      | 0      |
| Formosa             | 1              | 2              | 0      | 0      | 0      | 0      | 0      | 0      | 0      | 0      | 0      | 0      | 0      | 0      | 0      | 0      | 0      | 0      | 0      | 0      |
| Francisella         | 2              | 88             | 0      | 0      | 0      | 0      | 0      | 0      | 0      | 0      | 0      | 0      | 0      | 0      | 0      | 0      | 0      | 0      | 0      | 0      |
| Frankia             | 3              | 202            | 1      | 1      | 0      | 0      | 1      | 1      | 0      | 1      | 0      | 1      | 1      | 0      | 0      | 0      | 0      | 0      | 0      | 0      |
| Frateuria           | 1              | 25             | 0      | 0      | 0      | 1      | 0      | 0      | 0      | 0      | 1      | 0      | 1      | 0      | 0      | 0      | 0      | 0      | 0      | 0      |
| Fructobacillus      | 1              | 2              | 0      | 0      | 0      | 0      | 0      | 0      | 0      | 0      | 0      | 0      | 0      | 0      | 0      | 0      | 0      | 0      | 0      | 0      |
| Fulvimarina         | 1              | 2              | 0      | 0      | 0      | 0      | 0      | 0      | 0      | 0      | 0      | 0      | 0      | 0      | 0      | 0      | 0      | 0      | 0      | 0      |
| Fusobacterium       | 1              | 48             | 0      | 0      | 0      | 0      | 0      | 0      | 0      | 0      | 0      | 0      | 0      | 0      | 0      | 0      | 0      | 0      | 0      | 0      |
| Gallibacterium      | 2              | 87             | 0      | 0      | 0      | 0      | 0      | 0      | 0      | 0      | 0      | 0      | 0      | 0      | 0      | 0      | 0      | 0      | 0      | 0      |
| Gallionella         | 2              | 67             | 0      | 0      | 0      | 0      | 0      | 0      | 0      | 0      | 0      | 0      | 0      | 0      | 0      | 0      | 0      | 0      | 0      | 0      |
| Gammaproteobacteria | 1              | 9              | 0      | 0      | 0      | 0      | 0      | 0      | 0      | 0      | 0      | 0      | 0      | 0      | 0      | 0      | 0      | 0      | 0      | 0      |
| Gardnerella         | 1              | 31             | 0      | 0      | 0      | 0      | 0      | 0      | 0      | 0      | 0      | 0      | 0      | 0      | 0      | 0      | 0      | 0      | 0      | 0      |
| Geitlerinema        | 1              | 9              | 0      | 0      | 0      | 0      | 0      | 0      | 0      | 0      | 0      | 0      | 0      | 0      | 0      | 0      | 0      | 0      | 0      | 0      |
| Gemmatimonas        | 2              | 93             | 0      | 0      | 0      | 0      | 0      | 0      | 0      | 0      | 0      | 0      | 0      | 0      | 0      | 0      | 0      | 0      | 0      | 0      |
| Geobacillus         | 2              | 168            | 0      | 0      | 0      | 0      | 1      | 0      | 0      | 0      | 0      | 1      | 0      | 0      | 0      | 0      | 0      | 0      | 0      | 1      |
| Geobacter           | 2              | 150            | 0      | 0      | 0      | 0      | 0      | 0      | 0      | 0      | 0      | 1      | 0      | 0      | 0      | 0      | 0      | 0      | 0      | 1      |
| Geodermatophilus    | 2              | 136            | 0      | 0      | 0      | 1      | 1      | 1      | 0      | 0      | 1      | 1      | 1      | 0      | 0      | 0      | 0      | 0      | 0      | 0      |
| Geopsychrobacter    | 1              | 2              | 0      | 0      | 0      | 0      | 0      | 0      | 0      | 0      | 0      | 0      | 0      | 0      | 0      | 0      | 0      | 0      | 0      | 0      |
| Gillisia            | 1              | 11             | 0      | 0      | 0      | 0      | 0      | 0      | 0      | 0      | 0      | 0      | 0      | 0      | 0      | 0      | 0      | 0      | 0      | 0      |
| Gilvimarinus        | 1              | 4              | 0      | 0      | 0      | 0      | 0      | 0      | 0      | 0      | 0      | 0      | 0      | 0      | 0      | 0      | 0      | 0      | 0      | 0      |
| Glaciecola          | 2              | 117            | 0      | 0      | 0      | 1      | 1      | 0      | 0      | 0      | 0      | 0      | 0      | 0      | 0      | 0      | 0      | 0      | 0      | 0      |

| Genus             | Cluster Number | Protein Counts | K03333 | K03379 | K03380 | K03381 | K03382 | K03383 | K03384 | K03391 | K03464 | K03518 | K03862 | K04098 | K04099 | K04100 | K04102 | K04105 | K04107 | K04110 |
|-------------------|----------------|----------------|--------|--------|--------|--------|--------|--------|--------|--------|--------|--------|--------|--------|--------|--------|--------|--------|--------|--------|
| Gloeobacter       | 2              | 67             | 0      | 0      | 0      | 0      | 0      | 0      | 0      | 0      | 0      | 0      | 0      | 0      | 0      | 0      | 0      | 0      | 0      | 0      |
| Gloeocapsa        | 1              | 20             | 0      | 0      | 0      | 0      | 1      | 1      | 0      | 0      | 0      | 0      | 0      | 0      | 0      | 0      | 0      | 0      | 0      | 1      |
| Gloeotheca        | 1              | 1              | 0      | 0      | 0      | 0      | 0      | 0      | 0      | 0      | 0      | 0      | 0      | 0      | 0      | 0      | 0      | 0      | 0      | 0      |
| Gluconacetobacter | 2              | 96             | 0      | 0      | 0      | 0      | 1      | 0      | 0      | 0      | 0      | 0      | 1      | 0      | 0      | 0      | 0      | 0      | 0      | 0      |
| Gluconobacter     | 2              | 76             | 0      | 0      | 0      | 0      | 1      | 0      | 0      | 0      | 0      | 0      | 1      | 0      | 0      | 0      | 0      | 0      | 0      | 0      |
| Gordonia          | 1              | 158            | 1      | 0      | 1      | 1      | 1      | 1      | 0      | 0      | 1      | 1      | 1      | 0      | 0      | 0      | 0      | 0      | 0      | 0      |
| Gordonibacter     | 1              | 32             | 0      | 0      | 0      | 0      | 0      | 0      | 0      | 0      | 0      | 0      | 0      | 0      | 0      | 0      | 0      | 0      | 0      | 0      |
| Gramella          | 2              | 104            | 0      | 0      | 0      | 0      | 0      | 0      | 0      | 0      | 0      | 0      | 0      | 0      | 0      | 0      | 0      | 0      | 0      | 0      |
| Granulibacter     | 2              | 90             | 0      | 0      | 0      | 0      | 0      | 0      | 0      | 0      | 0      | 0      | 1      | 0      | 0      | 0      | 0      | 0      | 0      | 0      |
| Granulicella      | 2              | 98             | 0      | 0      | 0      | 0      | 0      | 0      | 0      | 0      | 0      | 0      | 1      | 0      | 0      | 0      | 1      | 0      | 0      | 0      |
| Grimontia         | 1              | 9              | 0      | 0      | 0      | 0      | 0      | 0      | 0      | 0      | 0      | 0      | 0      | 0      | 0      | 0      | 0      | 0      | 0      | 0      |
| Haemophilus       | 2              | 117            | 0      | 0      | 0      | 0      | 0      | 0      | 0      | 0      | 0      | 0      | 0      | 0      | 0      | 0      | 0      | 0      | 0      | 0      |
| Hafnia            | 1              | 29             | 0      | 0      | 0      | 0      | 0      | 0      | 0      | 0      | 0      | 0      | 0      | 0      | 0      | 0      | 0      | 0      | 0      | 0      |
| Hahella           | 3              | 130            | 1      | 0      | 0      | 0      | 1      | 0      | 0      | 0      | 0      | 0      | 0      | 0      | 0      | 0      | 0      | 0      | 0      | 0      |
| Halalkalicoccus   | 1              | 18             | 0      | 0      | 0      | 0      | 0      | 0      | 0      | 0      | 0      | 1      | 0      | 0      | 0      | 0      | 0      | 0      | 0      | 0      |
| Halanaerobium     | 2              | 89             | 0      | 0      | 0      | 0      | 1      | 0      | 0      | 0      | 0      | 1      | 0      | 0      | 0      | 0      | 0      | 0      | 0      | 0      |
| Haliangium        | 2              | 108            | 1      | 0      | 0      | 0      | 0      | 0      | 0      | 0      | 0      | 1      | 0      | 0      | 0      | 0      | 0      | 0      | 0      | 0      |
| Haliscomenobacter | 2              | 107            | 0      | 0      | 0      | 0      | 0      | 0      | 0      | 0      | 0      | 1      | 0      | 0      | 0      | 0      | 0      | 0      | 0      | 0      |
| Haloarcula        | 1              | 22             | 0      | 0      | 0      | 0      | 0      | 0      | 0      | 0      | 0      | 1      | 0      | 0      | 0      | 0      | 0      | 0      | 0      | 0      |
| Halobacillus      | 1              | 19             | 0      | 0      | 0      | 0      | 0      | 0      | 0      | 0      | 0      | 0      | 0      | 0      | 0      | 0      | 0      | 0      | 0      | 0      |
| Halobacteriaceae  | 1              | 1              | 0      | 0      | 0      | 0      | 0      | 0      | 0      | 0      | 0      | 0      | 0      | 0      | 0      | 0      | 0      | 0      | 0      | 0      |
| Halobacterium     | 1              | 10             | 0      | 0      | 0      | 0      | 0      | 0      | 0      | 0      | 0      | 0      | 0      | 0      | 0      | 0      | 0      | 0      | 0      | 0      |
| Halobacteroides   | 1              | 14             | 0      | 0      | 0      | 0      | 1      | 0      | 0      | 0      | 0      | 1      | 0      | 0      | 0      | 0      | 0      | 0      | 0      | 0      |
| Haloferax         | 1              | 20             | 0      | 0      | 0      | 0      | 0      | 0      | 0      | 0      | 0      | 1      | 0      | 0      | 0      | 0      | 0      | 0      | 0      | 0      |
| Halogeometricum   | 1              | 12             | 0      | 0      | 0      | 0      | 0      | 0      | 0      | 0      | 0      | 0      | 0      | 0      | 0      | 0      | 0      | 0      | 0      | 0      |
| Halomicrobium     | 1              | 10             | 0      | 0      | 0      | 0      | 0      | 0      | 0      | 0      | 0      | 0      | 0      | 0      | 0      | 0      | 0      | 0      | 0      | 0      |
| Halomonas         | 1              | 149            | 0      | 0      | 0      | 0      | 1      | 0      | 0      | 0      | 0      | 0      | 1      | 0      | 0      | 0      | 0      | 0      | 0      | 0      |
| Halopiger         | 1              | 16             | 0      | 0      | 0      | 0      | 0      | 0      | 0      | 0      | 0      | 0      | 0      | 0      | 0      | 0      | 0      | 0      | 0      | 0      |
| Haloquadratum     | 1              | 19             | 0      | 0      | 0      | 0      | 0      | 0      | 0      | 0      | 0      | 1      | 0      | 0      | 0      | 0      | 0      | 0      | 0      | 0      |
| Halorhabdus       | 1              | 10             | 0      | 0      | 0      | 0      | 0      | 0      | 0      | 0      | 0      | 0      | 0      | 0      | 0      | 0      | 1      | 0      | 0      | 0      |
| Halorhodospira    | 2              | 71             | 0      | 0      | 0      | 0      | 0      | 0      | 0      | 0      | 0      | 0      | 0      | 0      | 0      | 0      | 0      | 0      | 0      | 0      |
| Halorubrum        | 1              | 16             | 0      | 0      | 0      | 0      | 0      | 0      | 0      | 0      | 0      | 0      | 0      | 0      | 0      | 0      | 0      | 0      | 0      | 0      |
| Haloterrigena     | 1              | 19             | 0      | 0      | 0      | 0      | 0      | 0      | 0      | 0      | 0      | 1      | 0      | 0      | 0      | 0      | 0      | 0      | 0      | 0      |
| Halothece         | 1              | 9              | 0      | 0      | 0      | 0      | 0      | 0      | 0      | 0      | 0      | 0      | 0      | 0      | 0      | 0      | 0      | 0      | 0      | 0      |
| Halothermothrix   | 2              | 50             | 0      | 0      | 0      | 0      | 0      | 0      | 0      | 0      | 0      | 0      | 0      | 0      | 0      | 0      | 0      | 0      | 0      | 0      |
| Halothiobacillus  | 2              | 65             | 0      | 0      | 0      | 0      | 1      | 0      | 0      | 0      | 0      | 0      | 0      | 0      | 0      | 0      | 0      | 0      | 0      | 0      |
| Halovivax         | 1              | 12             | 0      | 0      | 0      | 0      | 0      | 0      | 0      | 0      | 0      | 0      | 0      | 0      | 0      | 0      | 0      | 0      | 0      | 0      |
| Helicobacter      | 2              | 79             | 0      | 0      | 0      | 0      | 0      | 0      | 0      | 0      | 0      | 0      | 0      | 0      | 0      | 0      | 0      | 0      | 0      | 0      |
| Heliobacillus     | 1              | 4              | 0      | 0      | 0      | 0      | 0      | 0      | 0      | 0      | 0      | 0      | 0      | 0      | 0      | 0      | 0      | 0      | 0      | 0      |
| Heliobacterium    | 2              | 51             | 0      | 0      | 0      | 0      | 0      | 0      | 0      | 0      | 0      | 0      | 0      | 0      | 0      | 0      | 0      | 0      | 0      | 0      |
| Herbaspirillum    | 2              | 172            | 0      | 0      | 0      | 1      | 1      | 0      | 0      | 0      | 1      | 0      | 1      | 1      | 0      | 0      | 0      | 0      | 0      | 0      |
| Herminiimonas     | 3              | 89             | 0      | 0      | 0      | 0      | 0      | 0      | 0      | 0      | 0      | 0      | 0      | 0      | 0      | 0      | 1      | 0      | 0      | 0      |
| Herpetosiphon     | 3              | 90             | 0      | 0      | 0      | 0      | 0      | 0      | 0      | 0      | 0      | 0      | 0      | 0      | 0      | 0      | 0      | 0      | 0      | 0      |
| Hippea            | 2              | 44             | 0      | 0      | 0      | 0      | 0      | 0      | 0      | 0      | 0      | 0      | 0      | 0      | 0      | 0      | 0      | 0      | 0      | 0      |
| Hirschia          | 2              | 102            | 0      | 0      | 0      | 0      | 0      | 0      | 0      | 0      | 0      | 0      | 0      | 0      | 0      | 1      | 1      | 0      | 0      | 0      |
| Histophilus       | 2              | 72             | 0      | 0      | 0      | 0      | 0      | 0      | 0      | 0      | 0      | 0      | 0      | 0      | 0      | 0      | 0      | 0      | 0      | 0      |
| Hoeflea           | 1              | 16             | 0      | 0      | 0      | 0      | 0      | 0      | 0      | 0      | 0      | 0      | 0      | 0      | 0      | 0      | 0      | 0      | 0      | 0      |
| Hydrogenivirga    | 1              | 2              | 0      | 0      | 0      | 0      | 0      | 0      | 0      | 0      | 0      | 0      | 0      | 0      | 0      | 0      | 0      | 0      | 0      | 0      |
| Hydrogenobacter   | 2              | 55             | 0      | 0      | 0      | 0      | 0      | 0      | 0      | 0      | 0      | 1      | 0      | 0      | 0      | 0      | 0      | 0      | 0      | 0      |
| Hydrogenobaculum  | 2              | 44             | 0      | 0      | 0      | 0      | 0      | 0      | 0      | 0      | 0      | 0      | 0      | 0      | 0      | 0      | 0      | 0      | 0      | 0      |
| Hydrogenophaga    | 1              | 9              | 0      | 0      | 0      | 0      | 0      | 0      | 0      | 0      | 0      | 0      | 0      | 0      | 0      | 0      | 0      | 0      | 0      | 0      |
| Hylemonella       | 1              | 4              | 0      | 0      | 0      | 0      | 0      | 0      | 0      | 0      | 0      | 0      | 0      | 0      | 0      | 0      | 0      | 0      | 0      | 0      |

| Genus                 | Cluster Number | Protein Counts | K03333 | K03379 | K03380 | K03381 | K03382 | K03383 | K03384 | K03391 | K03464 | K03518 | K03862 | K04098 | K04099 | K04100 | K04102 | K04105 | K04107 | K04110 |
|-----------------------|----------------|----------------|--------|--------|--------|--------|--------|--------|--------|--------|--------|--------|--------|--------|--------|--------|--------|--------|--------|--------|
| Hyperthermus          | 1              | 6              | 0      | 0      | 0      | 0      | 0      | 0      | 0      | 0      | 0      | 0      | 0      | 0      | 0      | 0      | 0      | 0      | 0      | 0      |
| Hyphomicrobium        | 2              | 93             | 0      | 0      | 0      | 0      | 0      | 0      | 0      | 0      | 0      | 1      | 0      | 0      | 0      | 0      | 0      | 0      | 0      | 0      |
| Hyphomonas            | 3              | 105            | 0      | 0      | 0      | 0      | 0      | 0      | 0      | 0      | 0      | 0      | 0      | 0      | 0      | 0      | 0      | 0      | 0      | 0      |
| Ideonella             | 1              | 18             | 0      | 0      | 0      | 0      | 0      | 0      | 0      | 0      | 0      | 0      | 0      | 0      | 0      | 0      | 0      | 0      | 0      | 0      |
| Idiomarina            | 2              | 86             | 0      | 0      | 0      | 0      | 0      | 0      | 0      | 0      | 0      | 0      | 0      | 0      | 0      | 0      | 0      | 0      | 0      | 0      |
| Ignavibacterium       | 1              | 14             | 0      | 0      | 0      | 0      | 0      | 0      | 0      | 0      | 0      | 0      | 0      | 0      | 0      | 0      | 0      | 0      | 0      | 0      |
| Ignicoccus            | 1              | 5              | 0      | 0      | 0      | 0      | 0      | 0      | 0      | 0      | 0      | 0      | 0      | 0      | 0      | 0      | 0      | 0      | 0      | 0      |
| Ignisphaera           | 1              | 8              | 0      | 0      | 0      | 0      | 0      | 0      | 0      | 0      | 0      | 0      | 0      | 0      | 0      | 0      | 0      | 0      | 0      | 0      |
| Ilyobacter            | 2              | 85             | 0      | 0      | 0      | 0      | 0      | 0      | 0      | 0      | 0      | 1      | 0      | 0      | 0      | 0      | 0      | 0      | 0      | 0      |
| Intrasporangium       | 2              | 114            | 1      | 0      | 0      | 0      | 0      | 1      | 0      | 0      | 0      | 1      | 0      | 0      | 0      | 0      | 0      | 0      | 0      | 0      |
| Isoptericola          | 1              | 18             | 0      | 0      | 1      | 0      | 0      | 0      | 0      | 0      | 0      | 0      | 0      | 0      | 0      | 0      | 0      | 0      | 0      | 0      |
| Isosphaera            | 2              | 75             | 0      | 0      | 0      | 0      | 0      | 0      | 0      | 0      | 0      | 0      | 0      | 0      | 0      | 0      | 0      | 0      | 0      | 0      |
| Jannaschia            | 3              | 151            | 0      | 0      | 0      | 0      | 1      | 0      | 0      | 0      | 0      | 1      | 1      | 0      | 0      | 0      | 0      | 1      | 0      | 0      |
| Janthinobacterium     | 2              | 99             | 0      | 0      | 0      | 0      | 1      | 0      | 0      | 0      | 0      | 1      | 1      | 0      | 0      | 0      | 0      | 0      | 0      | 0      |
| Jonesia               | 2              | 56             | 0      | 0      | 0      | 0      | 0      | 0      | 0      | 0      | 0      | 0      | 0      | 0      | 0      | 0      | 0      | 0      | 0      | 0      |
| Joostella             | 1              | 3              | 0      | 0      | 0      | 0      | 0      | 0      | 0      | 0      | 0      | 0      | 0      | 0      | 0      | 0      | 0      | 0      | 0      | 0      |
| Kaistia               | 1              | 2              | 0      | 0      | 0      | 0      | 0      | 0      | 0      | 0      | 0      | 0      | 0      | 0      | 0      | 0      | 0      | 0      | 0      | 0      |
| Kangiella             | 2              | 84             | 0      | 0      | 0      | 0      | 0      | 0      | 0      | 0      | 0      | 0      | 0      | 0      | 0      | 0      | 0      | 0      | 0      | 0      |
| Ketogulonicigenium    | 2              | 102            | 0      | 0      | 0      | 0      | 0      | 0      | 0      | 0      | 0      | 0      | 0      | 0      | 0      | 0      | 0      | 0      | 0      | 0      |
| Kineococcus           | 1              | 24             | 0      | 0      | 0      | 0      | 1      | 0      | 0      | 0      | 0      | 0      | 0      | 0      | 0      | 0      | 0      | 0      | 0      | 0      |
| Kinetoplastibacterium | 1              | 2              | 0      | 0      | 0      | 0      | 0      | 0      | 0      | 0      | 0      | 0      | 0      | 0      | 0      | 0      | 0      | 0      | 0      | 0      |
| Kingella              | 1              | 4              | 0      | 0      | 0      | 0      | 0      | 0      | 0      | 0      | 0      | 0      | 0      | 0      | 0      | 0      | 0      | 0      | 0      | 0      |
| Kitasatospora         | 1              | 36             | 1      | 0      | 0      | 0      | 1      | 0      | 0      | 0      | 0      | 1      | 1      | 0      | 1      | 0      | 0      | 0      | 0      | 0      |
| Klebsiella            | 3              | 222            | 0      | 0      | 0      | 1      | 1      | 0      | 0      | 0      | 1      | 1      | 1      | 0      | 1      | 0      | 0      | 0      | 0      | 0      |
| Kluyvera              | 1              | 1              | 0      | 0      | 0      | 0      | 0      | 0      | 0      | 0      | 0      | 0      | 0      | 0      | 0      | 0      | 0      | 0      | 0      | 0      |
| Kocuria               | 2              | 87             | 0      | 0      | 1      | 0      | 0      | 0      | 0      | 0      | 0      | 0      | 0      | 0      | 0      | 0      | 0      | 0      | 0      | 0      |
| Kordia                | 1              | 5              | 0      | 0      | 0      | 0      | 0      | 0      | 0      | 0      | 0      | 0      | 0      | 0      | 0      | 0      | 0      | 0      | 0      | 0      |
| Kosmotoga             | 2              | 61             | 0      | 0      | 0      | 0      | 1      | 0      | 0      | 0      | 0      | 1      | 0      | 0      | 0      | 0      | 0      | 0      | 0      | 0      |
| Kribbella             | 2              | 99             | 1      | 0      | 0      | 0      | 0      | 0      | 0      | 0      | 0      | 0      | 0      | 0      | 0      | 0      | 0      | 0      | 0      | 0      |
| Krokinobacter         | 2              | 90             | 1      | 0      | 0      | 0      | 0      | 0      | 0      | 0      | 0      | 0      | 0      | 0      | 0      | 0      | 0      | 0      | 0      | 0      |
| Kyrpidia              | 2              | 113            | 0      | 0      | 0      | 0      | 1      | 0      | 0      | 0      | 0      | 1      | 0      | 0      | 0      | 0      | 0      | 0      | 0      | 0      |
| Kytococcus            | 2              | 70             | 0      | 0      | 0      | 0      | 0      | 0      | 0      | 0      | 0      | 0      | 0      | 0      | 0      | 0      | 0      | 0      | 0      | 0      |
| Labrenzia             | 1              | 4              | 0      | 0      | 0      | 0      | 0      | 0      | 0      | 0      | 0      | 0      | 0      | 0      | 0      | 0      | 0      | 0      | 0      | 0      |
| Lachnoanaerobaculum   | 1              | 1              | 0      | 0      | 0      | 0      | 0      | 0      | 0      | 0      | 0      | 0      | 0      | 0      | 0      | 0      | 0      | 0      | 0      | 0      |
| Lachnospiraceae       | 1              | 51             | 0      | 0      | 0      | 0      | 0      | 0      | 0      | 0      | 0      | 1      | 0      | 0      | 0      | 0      | 0      | 0      | 0      | 0      |
| Lacinutrix            | 1              | 20             | 0      | 0      | 0      | 0      | 0      | 0      | 0      | 0      | 0      | 0      | 0      | 0      | 0      | 0      | 0      | 0      | 0      | 0      |
| Lactobacillus         | 2              | 119            | 0      | 0      | 0      | 0      | 0      | 0      | 0      | 0      | 0      | 0      | 0      | 0      | 0      | 0      | 0      | 0      | 0      | 0      |
| Lactococcus           | 2              | 82             | 0      | 0      | 0      | 0      | 0      | 0      | 0      | 0      | 0      | 0      | 0      | 0      | 0      | 0      | 0      | 0      | 0      | 0      |
| Lamprocystis          | 1              | 2              | 0      | 0      | 0      | 0      | 0      | 0      | 0      | 0      | 0      | 0      | 0      | 0      | 0      | 0      | 0      | 0      | 0      | 0      |
| Laribacter            | 2              | 80             | 0      | 0      | 0      | 0      | 0      | 0      | 0      | 0      | 0      | 0      | 0      | 0      | 0      | 0      | 0      | 0      | 0      | 0      |
| Lawsonia              | 2              | 33             | 0      | 0      | 0      | 0      | 0      | 0      | 0      | 0      | 0      | 0      | 0      | 0      | 0      | 0      | 0      | 0      | 0      | 0      |
| Leadbetterella        | 2              | 79             | 0      | 0      | 0      | 0      | 0      | 0      | 0      | 0      | 0      | 0      | 0      | 0      | 0      | 0      | 0      | 0      | 0      | 0      |
| Leeuwenhoekiiella     | 1              | 2              | 0      | 0      | 0      | 0      | 0      | 0      | 0      | 0      | 0      | 0      | 0      | 0      | 0      | 0      | 0      | 0      | 0      | 0      |
| Legionella            | 2              | 117            | 0      | 0      | 0      | 0      | 0      | 0      | 0      | 0      | 0      | 0      | 0      | 0      | 0      | 0      | 0      | 0      | 0      | 0      |
| Leifsonia             | 2              | 48             | 0      | 0      | 0      | 0      | 0      | 0      | 0      | 0      | 0      | 0      | 0      | 0      | 0      | 0      | 0      | 0      | 0      | 0      |
| Leptolyngbya          | 1              | 10             | 0      | 0      | 0      | 0      | 0      | 0      | 0      | 0      | 0      | 0      | 0      | 0      | 0      | 0      | 0      | 0      | 0      | 0      |
| Leptospira            | 2              | 76             | 1      | 0      | 0      | 0      | 0      | 0      | 0      | 0      | 0      | 0      | 0      | 0      | 0      | 0      | 0      | 0      | 0      | 0      |
| Leptospirillum        | 1              | 10             | 0      | 0      | 0      | 0      | 0      | 0      | 0      | 0      | 0      | 0      | 0      | 0      | 0      | 0      | 0      | 0      | 0      | 0      |
| Leptothrix            | 3              | 186            | 1      | 0      | 0      | 0      | 1      | 0      | 0      | 0      | 0      | 0      | 1      | 1      | 0      | 1      | 0      | 0      | 0      | 1      |
| Leptotrichia          | 2              | 43             | 0      | 0      | 0      | 0      | 0      | 0      | 0      | 0      | 0      | 0      | 0      | 0      | 0      | 0      | 0      | 0      | 0      | 0      |
| Leucobacter           | 1              | 2              | 0      | 0      | 0      | 0      | 0      | 0      | 0      | 0      | 0      | 0      | 0      | 0      | 1      | 0      | 0      | 0      | 0      | 0      |
| Leuconostoc           | 2              | 64             | 0      | 0      | 0      | 0      | 0      | 0      | 0      | 0      | 0      | 0      | 0      | 0      | 0      | 0      | 0      | 0      | 0      | 0      |

| Genus                | Cluster Number | Protein Counts | K03333 | K03379 | K03380 | K03381 | K03382 | K03383 | K03384 | K03391 | K03464 | K03518 | K03862 | K04098 | K04099 | K04100 | K04102 | K04105 | K04107 | K04110 |
|----------------------|----------------|----------------|--------|--------|--------|--------|--------|--------|--------|--------|--------|--------|--------|--------|--------|--------|--------|--------|--------|--------|
| Liberibacter         | 1              | 4              | 0      | 0      | 0      | 0      | 0      | 0      | 0      | 0      | 0      | 0      | 0      | 0      | 0      | 0      | 0      | 0      | 0      | 0      |
| Limnohabitans        | 1              | 11             | 0      | 0      | 0      | 0      | 0      | 0      | 0      | 0      | 0      | 0      | 0      | 0      | 0      | 1      | 0      | 0      | 0      | 0      |
| Listeria             | 2              | 77             | 0      | 0      | 0      | 0      | 0      | 0      | 0      | 0      | 0      | 0      | 0      | 0      | 0      | 0      | 0      | 0      | 0      | 0      |
| Listeriaceae         | 1              | 6              | 0      | 0      | 0      | 0      | 0      | 0      | 0      | 0      | 0      | 0      | 0      | 0      | 0      | 0      | 0      | 0      | 0      | 0      |
| Listonella           | 1              | 38             | 0      | 0      | 0      | 0      | 0      | 0      | 0      | 0      | 0      | 0      | 0      | 0      | 0      | 0      | 0      | 0      | 0      | 0      |
| Loktanella           | 1              | 3              | 0      | 0      | 0      | 0      | 0      | 0      | 0      | 0      | 0      | 0      | 0      | 0      | 0      | 0      | 0      | 0      | 0      | 0      |
| Lysinibacillus       | 2              | 97             | 0      | 0      | 0      | 0      | 0      | 0      | 0      | 0      | 0      | 0      | 0      | 0      | 0      | 0      | 0      | 0      | 0      | 0      |
| Macrococcus          | 2              | 60             | 0      | 0      | 0      | 0      | 0      | 0      | 0      | 0      | 0      | 0      | 0      | 0      | 0      | 0      | 0      | 0      | 0      | 0      |
| Magnetococcus        | 2              | 64             | 0      | 0      | 0      | 0      | 0      | 0      | 0      | 0      | 0      | 0      | 0      | 0      | 0      | 0      | 0      | 0      | 0      | 0      |
| Magnetospirillum     | 2              | 113            | 0      | 0      | 0      | 0      | 0      | 0      | 0      | 0      | 0      | 1      | 0      | 0      | 0      | 1      | 0      | 1      | 1      | 0      |
| Mahella              | 2              | 58             | 0      | 0      | 0      | 0      | 0      | 0      | 0      | 0      | 0      | 0      | 0      | 0      | 0      | 0      | 0      | 0      | 0      | 0      |
| Mannheimia           | 2              | 85             | 0      | 0      | 0      | 0      | 0      | 0      | 0      | 0      | 0      | 0      | 0      | 0      | 0      | 0      | 0      | 0      | 0      | 0      |
| Maribacter           | 3              | 87             | 0      | 0      | 0      | 0      | 0      | 0      | 0      | 0      | 0      | 0      | 0      | 0      | 0      | 0      | 0      | 0      | 0      | 0      |
| Maricaulis           | 3              | 87             | 0      | 0      | 0      | 0      | 0      | 0      | 0      | 0      | 0      | 0      | 0      | 0      | 0      | 0      | 0      | 0      | 0      | 0      |
| Marichromatium       | 1              | 2              | 0      | 0      | 0      | 0      | 0      | 0      | 0      | 0      | 0      | 0      | 0      | 0      | 0      | 0      | 0      | 0      | 0      | 0      |
| Marinithermus        | 2              | 77             | 0      | 0      | 0      | 0      | 0      | 0      | 0      | 0      | 0      | 0      | 0      | 0      | 0      | 0      | 0      | 0      | 0      | 0      |
| Marinitoga           | 1              | 15             | 0      | 0      | 0      | 0      | 1      | 0      | 0      | 0      | 0      | 1      | 0      | 0      | 0      | 0      | 0      | 0      | 0      | 0      |
| Marinobacter         | 2              | 163            | 0      | 1      | 0      | 1      | 0      | 0      | 0      | 0      | 1      | 0      | 0      | 0      | 0      | 0      | 1      | 0      | 0      | 0      |
| Marinomonas          | 3              | 192            | 0      | 0      | 1      | 1      | 1      | 0      | 0      | 0      | 1      | 0      | 1      | 0      | 0      | 1      | 0      | 0      | 0      | 0      |
| Maritimibacter       | 1              | 7              | 0      | 0      | 0      | 0      | 0      | 0      | 0      | 0      | 0      | 0      | 0      | 0      | 0      | 0      | 0      | 0      | 0      | 0      |
| Marivirga            | 2              | 96             | 1      | 0      | 0      | 0      | 0      | 0      | 0      | 0      | 0      | 0      | 0      | 0      | 0      | 0      | 0      | 0      | 0      | 0      |
| Martella             | 1              | 3              | 0      | 0      | 0      | 0      | 0      | 0      | 0      | 0      | 0      | 0      | 0      | 0      | 0      | 0      | 0      | 0      | 0      | 0      |
| Marvinbryantia       | 1              | 1              | 0      | 0      | 0      | 0      | 0      | 0      | 0      | 0      | 0      | 0      | 0      | 0      | 0      | 0      | 0      | 0      | 0      | 0      |
| Massilia             | 1              | 4              | 0      | 0      | 0      | 0      | 0      | 0      | 0      | 0      | 0      | 0      | 0      | 0      | 0      | 0      | 0      | 0      | 0      | 0      |
| Mastigocladopsis     | 1              | 16             | 0      | 0      | 0      | 0      | 0      | 0      | 0      | 0      | 0      | 0      | 0      | 0      | 0      | 0      | 0      | 0      | 0      | 0      |
| Megamonas            | 1              | 47             | 0      | 0      | 0      | 0      | 0      | 0      | 0      | 0      | 0      | 1      | 0      | 0      | 0      | 0      | 0      | 0      | 0      | 0      |
| Megasphaera          | 1              | 14             | 0      | 0      | 0      | 0      | 0      | 0      | 0      | 0      | 0      | 1      | 0      | 0      | 0      | 0      | 0      | 0      | 0      | 0      |
| Meiothermus          | 2              | 110            | 0      | 0      | 0      | 0      | 0      | 0      | 0      | 0      | 0      | 1      | 0      | 0      | 0      | 0      | 0      | 0      | 0      | 0      |
| Melissococcus        | 2              | 46             | 0      | 0      | 0      | 0      | 0      | 0      | 0      | 0      | 0      | 0      | 0      | 0      | 0      | 0      | 0      | 0      | 0      | 0      |
| Mesoflavibacter      | 1              | 6              | 0      | 0      | 0      | 0      | 0      | 0      | 0      | 0      | 0      | 0      | 0      | 0      | 0      | 0      | 0      | 0      | 0      | 0      |
| Mesoplasma           | 1              | 23             | 0      | 0      | 0      | 0      | 0      | 0      | 0      | 0      | 0      | 0      | 0      | 0      | 0      | 0      | 0      | 0      | 0      | 0      |
| Mesorhizobium        | 2              | 201            | 0      | 0      | 0      | 1      | 0      | 0      | 0      | 0      | 0      | 1      | 1      | 0      | 0      | 0      | 0      | 0      | 0      | 0      |
| Mesotoga             | 1              | 14             | 0      | 0      | 0      | 0      | 1      | 0      | 0      | 0      | 0      | 1      | 0      | 0      | 0      | 0      | 0      | 0      | 0      | 0      |
| Metallosphaera       | 1              | 18             | 0      | 0      | 0      | 0      | 0      | 0      | 0      | 0      | 0      | 1      | 0      | 0      | 0      | 0      | 0      | 0      | 0      | 0      |
| Methanobacterium     | 1              | 7              | 0      | 0      | 0      | 0      | 0      | 0      | 0      | 0      | 0      | 0      | 0      | 0      | 0      | 0      | 0      | 0      | 0      | 0      |
| Methanobrevibacter   | 1              | 9              | 0      | 0      | 0      | 0      | 0      | 0      | 0      | 0      | 0      | 0      | 0      | 0      | 0      | 0      | 0      | 0      | 0      | 0      |
| Methanocaldococcus   | 1              | 6              | 0      | 0      | 0      | 0      | 0      | 0      | 0      | 0      | 0      | 0      | 0      | 0      | 0      | 0      | 0      | 0      | 0      | 0      |
| Methanocella         | 1              | 15             | 0      | 0      | 0      | 0      | 0      | 0      | 0      | 0      | 0      | 0      | 0      | 0      | 0      | 0      | 0      | 0      | 0      | 0      |
| Methanococcaceae     | 1              | 1              | 0      | 0      | 0      | 0      | 0      | 0      | 0      | 0      | 0      | 0      | 0      | 0      | 0      | 0      | 0      | 0      | 0      | 0      |
| Methanococcoides     | 1              | 5              | 0      | 0      | 0      | 0      | 0      | 0      | 0      | 0      | 0      | 0      | 0      | 0      | 0      | 0      | 0      | 0      | 0      | 0      |
| Methanococcus        | 1              | 9              | 0      | 0      | 0      | 0      | 0      | 0      | 0      | 0      | 0      | 0      | 0      | 0      | 0      | 0      | 0      | 0      | 0      | 0      |
| Methanocorpusculum   | 1              | 7              | 0      | 0      | 0      | 0      | 0      | 0      | 0      | 0      | 0      | 0      | 0      | 0      | 0      | 0      | 0      | 0      | 0      | 0      |
| Methanoculleus       | 1              | 8              | 0      | 0      | 0      | 0      | 0      | 0      | 0      | 0      | 0      | 0      | 0      | 0      | 0      | 0      | 0      | 0      | 0      | 0      |
| Methanohalobium      | 1              | 5              | 0      | 0      | 0      | 0      | 0      | 0      | 0      | 0      | 0      | 0      | 0      | 0      | 0      | 0      | 0      | 0      | 0      | 0      |
| Methanohalophilus    | 1              | 5              | 0      | 0      | 0      | 0      | 0      | 0      | 0      | 0      | 0      | 0      | 0      | 0      | 0      | 0      | 0      | 0      | 0      | 0      |
| Methanolobus         | 1              | 5              | 0      | 0      | 0      | 0      | 0      | 0      | 0      | 0      | 0      | 0      | 0      | 0      | 0      | 0      | 0      | 0      | 0      | 0      |
| Methanomethylovorans | 1              | 5              | 0      | 0      | 0      | 0      | 0      | 0      | 0      | 0      | 0      | 0      | 0      | 0      | 0      | 0      | 0      | 0      | 0      | 0      |
| Methanoplanus        | 1              | 7              | 0      | 0      | 0      | 0      | 0      | 0      | 0      | 0      | 0      | 0      | 0      | 0      | 0      | 0      | 0      | 0      | 0      | 0      |
| Methanopyrus         | 1              | 4              | 0      | 0      | 0      | 0      | 0      | 0      | 0      | 0      | 0      | 0      | 0      | 0      | 0      | 0      | 0      | 0      | 0      | 0      |
| Methanoregula        | 1              | 8              | 0      | 0      | 0      | 0      | 0      | 0      | 0      | 0      | 0      | 0      | 0      | 0      | 0      | 0      | 0      | 0      | 0      | 0      |
| Methanosaeta         | 1              | 9              | 0      | 0      | 0      | 0      | 0      | 0      | 0      | 0      | 0      | 0      | 0      | 0      | 0      | 0      | 0      | 0      | 0      | 0      |
| Methanosalsum        | 1              | 7              | 0      | 0      | 0      | 0      | 0      | 0      | 0      | 0      | 0      | 0      | 0      | 0      | 0      | 0      | 0      | 0      | 0      | 0      |

| Genus               | Cluster Number | Protein Counts | K03333 | K03379 | K03380 | K03381 | K03382 | K03383 | K03384 | K03391 | K03464 | K03518 | K03862 | K04098 | K04099 | K04100 | K04102 | K04105 | K04107 | K04110 |
|---------------------|----------------|----------------|--------|--------|--------|--------|--------|--------|--------|--------|--------|--------|--------|--------|--------|--------|--------|--------|--------|--------|
| Methanosarcina      | 1              | 18             | 0      | 0      | 0      | 0      | 0      | 0      | 0      | 0      | 0      | 0      | 0      | 0      | 0      | 0      | 0      | 0      | 0      | 0      |
| Methanosphaera      | 1              | 7              | 0      | 0      | 0      | 0      | 0      | 0      | 0      | 0      | 0      | 0      | 0      | 0      | 0      | 0      | 0      | 0      | 0      | 0      |
| Methanosphaerula    | 1              | 8              | 0      | 0      | 0      | 0      | 0      | 0      | 0      | 0      | 0      | 0      | 0      | 0      | 0      | 0      | 0      | 0      | 0      | 0      |
| Methanospirillum    | 1              | 6              | 0      | 0      | 0      | 0      | 0      | 0      | 0      | 0      | 0      | 0      | 0      | 0      | 0      | 0      | 0      | 0      | 0      | 0      |
| Methanothermobacter | 1              | 6              | 0      | 0      | 0      | 0      | 0      | 0      | 0      | 0      | 0      | 0      | 0      | 0      | 0      | 0      | 0      | 0      | 0      | 0      |
| Methanothermococcus | 1              | 5              | 0      | 0      | 0      | 0      | 0      | 0      | 0      | 0      | 0      | 0      | 0      | 0      | 0      | 0      | 0      | 0      | 0      | 0      |
| Methanothermus      | 1              | 5              | 0      | 0      | 0      | 0      | 0      | 0      | 0      | 0      | 0      | 0      | 0      | 0      | 0      | 0      | 0      | 0      | 0      | 0      |
| Methanotorris       | 1              | 5              | 0      | 0      | 0      | 0      | 0      | 0      | 0      | 0      | 0      | 0      | 0      | 0      | 0      | 0      | 0      | 0      | 0      | 0      |
| Methylacidiphilum   | 2              | 48             | 0      | 0      | 0      | 0      | 0      | 0      | 0      | 0      | 0      | 0      | 1      | 0      | 0      | 0      | 0      | 0      | 0      | 0      |
| Methylarcula        | 1              | 2              | 0      | 0      | 0      | 0      | 0      | 0      | 0      | 0      | 0      | 0      | 0      | 0      | 0      | 0      | 0      | 0      | 0      | 0      |
| Methylibium         | 1              | 38             | 0      | 1      | 0      | 0      | 1      | 0      | 0      | 0      | 0      | 0      | 1      | 0      | 0      | 0      | 0      | 0      | 0      | 0      |
| Methylobacillus     | 2              | 61             | 0      | 0      | 0      | 0      | 0      | 0      | 0      | 0      | 0      | 0      | 0      | 0      | 0      | 0      | 0      | 0      | 0      | 0      |
| Methylobacterium    | 3              | 236            | 0      | 0      | 1      | 1      | 1      | 1      | 0      | 0      | 1      | 1      | 1      | 1      | 0      | 0      | 0      | 0      | 0      | 0      |
| Methylocella        | 3              | 117            | 0      | 0      | 0      | 0      | 0      | 0      | 0      | 0      | 0      | 0      | 0      | 0      | 0      | 0      | 0      | 0      | 0      | 0      |
| Methylococcus       | 2              | 80             | 0      | 0      | 0      | 0      | 0      | 0      | 0      | 0      | 0      | 0      | 0      | 0      | 0      | 0      | 0      | 0      | 0      | 0      |
| Methylocystis       | 1              | 21             | 0      | 0      | 0      | 0      | 0      | 0      | 0      | 0      | 0      | 0      | 0      | 0      | 0      | 0      | 0      | 0      | 0      | 0      |
| Methyloferula       | 1              | 2              | 0      | 0      | 0      | 0      | 0      | 0      | 0      | 0      | 0      | 0      | 0      | 0      | 0      | 0      | 0      | 0      | 0      | 0      |
| Methylomicrobium    | 1              | 12             | 0      | 0      | 0      | 0      | 0      | 0      | 0      | 0      | 0      | 0      | 0      | 0      | 0      | 0      | 0      | 0      | 0      | 0      |
| Methylomonas        | 1              | 15             | 0      | 0      | 0      | 0      | 0      | 0      | 0      | 0      | 0      | 0      | 0      | 0      | 0      | 0      | 0      | 0      | 0      | 0      |
| Methylophaga        | 1              | 7              | 0      | 0      | 0      | 0      | 0      | 0      | 0      | 0      | 0      | 0      | 0      | 0      | 0      | 0      | 0      | 0      | 0      | 0      |
| Methylophilus       | 1              | 2              | 0      | 0      | 0      | 0      | 0      | 0      | 0      | 0      | 0      | 0      | 0      | 0      | 0      | 0      | 0      | 0      | 0      | 0      |
| Methylosinus        | 1              | 2              | 0      | 0      | 0      | 0      | 0      | 0      | 0      | 0      | 0      | 0      | 0      | 0      | 0      | 0      | 0      | 0      | 0      | 0      |
| Methylotenera       | 2              | 72             | 0      | 0      | 0      | 0      | 0      | 0      | 0      | 0      | 0      | 0      | 0      | 0      | 0      | 0      | 0      | 0      | 0      | 0      |
| Methyloversatilis   | 1              | 5              | 0      | 0      | 0      | 0      | 0      | 0      | 0      | 0      | 0      | 0      | 0      | 0      | 0      | 0      | 0      | 0      | 0      | 0      |
| Methylovorus        | 2              | 66             | 0      | 0      | 0      | 0      | 0      | 0      | 0      | 0      | 0      | 0      | 0      | 0      | 0      | 0      | 0      | 0      | 0      | 0      |
| Micavibrio          | 1              | 9              | 0      | 0      | 0      | 0      | 0      | 0      | 0      | 0      | 0      | 0      | 0      | 0      | 0      | 0      | 0      | 0      | 0      | 0      |
| Microbacterium      | 2              | 115            | 0      | 0      | 1      | 0      | 1      | 0      | 0      | 0      | 0      | 0      | 1      | 0      | 1      | 0      | 0      | 0      | 0      | 0      |
| Microchaete         | 1              | 23             | 0      | 0      | 0      | 0      | 0      | 0      | 0      | 0      | 0      | 0      | 0      | 0      | 0      | 0      | 0      | 0      | 0      | 0      |
| Micrococcus         | 2              | 72             | 0      | 0      | 1      | 0      | 0      | 0      | 0      | 0      | 0      | 0      | 0      | 0      | 0      | 0      | 0      | 0      | 0      | 0      |
| Microcoleus         | 1              | 17             | 0      | 0      | 0      | 0      | 0      | 0      | 0      | 0      | 0      | 0      | 0      | 0      | 0      | 0      | 0      | 0      | 0      | 1      |
| Microcystis         | 2              | 67             | 0      | 0      | 0      | 0      | 0      | 0      | 0      | 0      | 0      | 0      | 0      | 0      | 0      | 0      | 0      | 0      | 0      | 0      |
| Microlunatus        | 1              | 25             | 0      | 0      | 0      | 0      | 0      | 0      | 0      | 0      | 0      | 0      | 0      | 0      | 0      | 0      | 0      | 0      | 0      | 0      |
| Micromonospora      | 2              | 115            | 1      | 0      | 0      | 0      | 0      | 0      | 0      | 0      | 0      | 1      | 0      | 0      | 0      | 0      | 0      | 0      | 0      | 0      |
| Microvirga          | 1              | 6              | 0      | 0      | 0      | 0      | 0      | 0      | 0      | 0      | 0      | 0      | 0      | 0      | 0      | 0      | 0      | 0      | 0      | 0      |
| Mobiluncus          | 1              | 41             | 0      | 0      | 0      | 0      | 0      | 0      | 0      | 0      | 0      | 0      | 0      | 0      | 0      | 0      | 0      | 0      | 0      | 0      |
| Modestobacter       | 1              | 43             | 0      | 0      | 1      | 0      | 1      | 1      | 0      | 0      | 1      | 1      | 0      | 0      | 0      | 1      | 0      | 0      | 0      | 0      |
| Moorea              | 1              | 2              | 0      | 0      | 0      | 0      | 0      | 0      | 0      | 0      | 0      | 0      | 0      | 0      | 0      | 0      | 0      | 0      | 0      | 0      |
| Moorella            | 2              | 69             | 0      | 0      | 0      | 0      | 0      | 1      | 0      | 0      | 0      | 1      | 0      | 0      | 0      | 0      | 0      | 0      | 0      | 0      |
| Moraxella           | 2              | 66             | 0      | 0      | 0      | 0      | 0      | 0      | 0      | 0      | 0      | 0      | 0      | 0      | 0      | 0      | 0      | 0      | 0      | 0      |
| Morganella          | 1              | 29             | 0      | 0      | 0      | 0      | 0      | 0      | 0      | 0      | 0      | 0      | 0      | 0      | 0      | 0      | 0      | 0      | 0      | 0      |
| Moritella           | 1              | 2              | 0      | 0      | 0      | 0      | 0      | 0      | 0      | 0      | 0      | 0      | 0      | 0      | 0      | 0      | 0      | 0      | 0      | 0      |
| Muricauda           | 1              | 23             | 0      | 0      | 0      | 0      | 0      | 0      | 0      | 0      | 0      | 0      | 0      | 0      | 0      | 0      | 0      | 0      | 0      | 0      |
| Mycobacterium       | 3              | 306            | 1      | 1      | 0      | 1      | 1      | 0      | 0      | 1      | 1      | 1      | 1      | 1      | 0      | 0      | 1      | 0      | 0      | 0      |
| Mycoplasma          | 1              | 53             | 0      | 0      | 0      | 0      | 0      | 0      | 0      | 0      | 0      | 0      | 0      | 0      | 0      | 0      | 0      | 0      | 0      | 0      |
| Myxococcus          | 2              | 110            | 1      | 0      | 0      | 0      | 0      | 0      | 0      | 0      | 0      | 0      | 1      | 0      | 0      | 0      | 0      | 0      | 0      | 0      |
| Nakamurella         | 2              | 115            | 1      | 0      | 0      | 0      | 1      | 1      | 0      | 0      | 0      | 1      | 0      | 0      | 0      | 0      | 0      | 0      | 0      | 0      |
| napthalene          | 1              | 2              | 0      | 0      | 0      | 0      | 0      | 0      | 0      | 0      | 0      | 0      | 0      | 0      | 0      | 0      | 0      | 0      | 0      | 0      |
| Natranaerobius      | 2              | 55             | 0      | 0      | 0      | 0      | 0      | 0      | 0      | 0      | 0      | 1      | 0      | 0      | 0      | 0      | 0      | 0      | 0      | 0      |
| Natrialba           | 1              | 16             | 0      | 0      | 0      | 0      | 0      | 0      | 0      | 0      | 0      | 0      | 0      | 0      | 0      | 0      | 0      | 0      | 0      | 0      |
| Natrinema           | 1              | 16             | 0      | 0      | 0      | 0      | 0      | 0      | 0      | 0      | 0      | 0      | 0      | 0      | 0      | 0      | 0      | 0      | 0      | 0      |
| Natronobacterium    | 1              | 11             | 0      | 0      | 0      | 0      | 0      | 0      | 0      | 0      | 0      | 0      | 0      | 0      | 0      | 0      | 0      | 0      | 0      | 0      |
| Natronococcus       | 1              | 21             | 0      | 0      | 0      | 0      | 0      | 0      | 0      | 0      | 0      | 1      | 0      | 0      | 0      | 0      | 0      | 0      | 0      | 0      |

| Genus             | Cluster Number | Protein Counts | K03333 | K03379 | K03380 | K03381 | K03382 | K03383 | K03384 | K03391 | K03464 | K03518 | K03862 | K04098 | K04099 | K04100 | K04102 | K04105 | K04107 | K04110 |
|-------------------|----------------|----------------|--------|--------|--------|--------|--------|--------|--------|--------|--------|--------|--------|--------|--------|--------|--------|--------|--------|--------|
| Natronomonas      | 1              | 20             | 0      | 0      | 0      | 0      | 0      | 0      | 0      | 0      | 0      | 1      | 0      | 0      | 0      | 0      | 0      | 0      | 0      | 0      |
| Nautilia          | 2              | 48             | 0      | 0      | 0      | 0      | 0      | 0      | 0      | 0      | 0      | 0      | 0      | 0      | 0      | 0      | 0      | 0      | 0      | 0      |
| Neisseria         | 2              | 67             | 0      | 0      | 0      | 0      | 0      | 0      | 0      | 0      | 0      | 0      | 0      | 0      | 0      | 0      | 0      | 0      | 0      | 0      |
| Neisseriaceae     | 1              | 1              | 0      | 0      | 0      | 0      | 0      | 0      | 0      | 0      | 0      | 0      | 0      | 0      | 0      | 0      | 0      | 0      | 0      | 0      |
| Neorickettsia     | 1              | 31             | 0      | 0      | 0      | 0      | 0      | 0      | 0      | 0      | 0      | 0      | 0      | 0      | 0      | 0      | 0      | 0      | 0      | 0      |
| Neptuniibacter    | 1              | 2              | 0      | 0      | 0      | 0      | 0      | 0      | 0      | 0      | 0      | 0      | 0      | 0      | 0      | 0      | 0      | 0      | 0      | 0      |
| Niastella         | 1              | 21             | 0      | 0      | 0      | 0      | 0      | 0      | 0      | 0      | 0      | 1      | 0      | 0      | 0      | 0      | 0      | 0      | 0      | 0      |
| Nitratifractor    | 2              | 54             | 0      | 0      | 0      | 0      | 0      | 0      | 0      | 0      | 0      | 0      | 0      | 0      | 0      | 0      | 0      | 0      | 0      | 0      |
| Nitratireductor   | 1              | 19             | 0      | 0      | 0      | 0      | 0      | 0      | 0      | 0      | 0      | 0      | 0      | 0      | 0      | 0      | 0      | 0      | 0      | 0      |
| Nitratiruptor     | 2              | 40             | 0      | 0      | 0      | 0      | 0      | 0      | 0      | 0      | 0      | 0      | 0      | 0      | 0      | 0      | 0      | 0      | 0      | 0      |
| Nitrobacter       | 2              | 99             | 0      | 0      | 0      | 0      | 0      | 0      | 0      | 0      | 0      | 1      | 0      | 0      | 0      | 0      | 0      | 0      | 0      | 0      |
| Nitrococcus       | 1              | 2              | 0      | 0      | 0      | 0      | 0      | 0      | 0      | 0      | 0      | 0      | 0      | 0      | 0      | 0      | 0      | 0      | 0      | 0      |
| Nitrosococcus     | 2              | 94             | 0      | 0      | 0      | 0      | 0      | 0      | 0      | 0      | 0      | 0      | 0      | 0      | 0      | 0      | 0      | 0      | 0      | 0      |
| Nitrosomonas      | 2              | 72             | 0      | 0      | 0      | 0      | 0      | 0      | 0      | 0      | 0      | 0      | 0      | 0      | 0      | 0      | 0      | 0      | 0      | 0      |
| Nitrosopumilaceae | 1              | 7              | 0      | 0      | 0      | 0      | 0      | 0      | 0      | 0      | 0      | 0      | 0      | 0      | 0      | 0      | 0      | 0      | 0      | 0      |
| Nitrosopumilus    | 1              | 11             | 0      | 0      | 0      | 0      | 0      | 0      | 0      | 0      | 0      | 0      | 0      | 0      | 0      | 0      | 0      | 0      | 0      | 0      |
| Nitrospira        | 2              | 74             | 0      | 0      | 0      | 0      | 0      | 0      | 0      | 0      | 0      | 0      | 0      | 0      | 0      | 0      | 0      | 0      | 0      | 0      |
| Nocardia          | 2              | 185            | 1      | 0      | 1      | 1      | 1      | 0      | 0      | 0      | 1      | 1      | 0      | 0      | 0      | 0      | 0      | 0      | 0      | 0      |
| Nocardioidaceae   | 1              | 2              | 0      | 0      | 0      | 0      | 0      | 0      | 0      | 0      | 0      | 0      | 0      | 0      | 0      | 0      | 0      | 0      | 0      | 0      |
| Nocardioides      | 2              | 157            | 1      | 0      | 0      | 1      | 1      | 1      | 0      | 0      | 1      | 1      | 0      | 0      | 0      | 0      | 0      | 0      | 0      | 0      |
| Nocardiopsis      | 2              | 102            | 1      | 0      | 0      | 0      | 1      | 0      | 0      | 0      | 0      | 1      | 0      | 0      | 0      | 0      | 0      | 0      | 0      | 0      |
| Nodularia         | 1              | 22             | 0      | 0      | 0      | 0      | 0      | 0      | 0      | 0      | 0      | 0      | 0      | 0      | 0      | 0      | 0      | 0      | 0      | 0      |
| Nonlabens         | 1              | 19             | 0      | 0      | 0      | 0      | 0      | 0      | 0      | 0      | 0      | 0      | 0      | 0      | 0      | 0      | 0      | 0      | 0      | 0      |
| Nostoc            | 2              | 111            | 1      | 0      | 0      | 0      | 1      | 0      | 0      | 0      | 1      | 0      | 0      | 0      | 0      | 0      | 0      | 0      | 0      | 0      |
| Nostocaceae       | 1              | 2              | 0      | 0      | 0      | 0      | 0      | 0      | 0      | 0      | 0      | 0      | 0      | 0      | 0      | 0      | 0      | 0      | 0      | 0      |
| Novosphingobium   | 2              | 169            | 0      | 1      | 0      | 1      | 0      | 0      | 0      | 0      | 1      | 1      | 1      | 0      | 0      | 1      | 0      | 0      | 0      | 0      |
| Oceanibaculum     | 1              | 3              | 0      | 0      | 0      | 0      | 0      | 0      | 0      | 0      | 0      | 0      | 0      | 0      | 0      | 0      | 0      | 0      | 0      | 0      |
| Oceanibulbus      | 1              | 12             | 0      | 0      | 0      | 0      | 0      | 0      | 0      | 0      | 0      | 0      | 1      | 0      | 0      | 0      | 0      | 0      | 0      | 0      |
| Oceanicola        | 1              | 9              | 0      | 0      | 0      | 0      | 0      | 0      | 0      | 0      | 0      | 0      | 0      | 0      | 0      | 0      | 0      | 0      | 0      | 0      |
| Oceanimonas       | 1              | 33             | 0      | 0      | 0      | 1      | 1      | 0      | 0      | 0      | 1      | 0      | 0      | 0      | 0      | 0      | 0      | 0      | 0      | 0      |
| Oceaniovalibus    | 1              | 2              | 0      | 0      | 0      | 0      | 0      | 0      | 0      | 0      | 0      | 0      | 0      | 0      | 0      | 0      | 0      | 0      | 0      | 0      |
| Oceanithermus     | 2              | 72             | 0      | 0      | 0      | 0      | 0      | 0      | 0      | 0      | 0      | 0      | 0      | 0      | 0      | 0      | 0      | 0      | 0      | 0      |
| Oceanobacillus    | 2              | 91             | 0      | 0      | 0      | 0      | 0      | 0      | 0      | 0      | 0      | 0      | 0      | 0      | 0      | 0      | 0      | 0      | 0      | 0      |
| Oceanospirillum   | 1              | 2              | 0      | 0      | 0      | 0      | 0      | 0      | 0      | 0      | 0      | 0      | 0      | 0      | 0      | 0      | 0      | 0      | 0      | 0      |
| Ochrobactrum      | 2              | 133            | 0      | 0      | 0      | 0      | 0      | 0      | 0      | 0      | 0      | 0      | 0      | 0      | 0      | 0      | 0      | 0      | 0      | 0      |
| Octadecabacter    | 1              | 29             | 0      | 0      | 0      | 1      | 1      | 0      | 0      | 0      | 0      | 1      | 1      | 0      | 0      | 0      | 0      | 0      | 0      | 0      |
| Oenococcus        | 2              | 41             | 0      | 0      | 0      | 0      | 0      | 0      | 0      | 0      | 0      | 0      | 0      | 0      | 0      | 0      | 0      | 0      | 0      | 0      |
| Oleomonas         | 1              | 2              | 0      | 0      | 0      | 0      | 0      | 0      | 0      | 0      | 0      | 0      | 0      | 0      | 0      | 0      | 0      | 0      | 0      | 0      |
| Oligotropha       | 3              | 87             | 0      | 0      | 0      | 0      | 0      | 0      | 0      | 0      | 0      | 1      | 0      | 0      | 0      | 0      | 0      | 0      | 0      | 0      |
| Olsenella         | 2              | 40             | 0      | 0      | 0      | 0      | 0      | 0      | 0      | 0      | 0      | 0      | 0      | 0      | 0      | 0      | 0      | 0      | 0      | 0      |
| Opitutus          | 2              | 67             | 0      | 0      | 0      | 0      | 0      | 0      | 0      | 0      | 0      | 0      | 0      | 0      | 0      | 0      | 0      | 0      | 0      | 0      |
| Orientia          | 1              | 21             | 0      | 0      | 0      | 0      | 0      | 0      | 0      | 0      | 0      | 0      | 0      | 0      | 0      | 0      | 0      | 0      | 0      | 0      |
| Ornithobacterium  | 1              | 11             | 1      | 0      | 0      | 0      | 0      | 0      | 0      | 0      | 0      | 0      | 0      | 0      | 0      | 0      | 0      | 0      | 0      | 0      |
| Oscillatoria      | 1              | 16             | 0      | 0      | 0      | 0      | 0      | 0      | 0      | 0      | 0      | 0      | 0      | 0      | 0      | 0      | 0      | 0      | 0      | 0      |
| Oscillatoriales   | 1              | 2              | 0      | 0      | 0      | 0      | 0      | 0      | 0      | 0      | 0      | 0      | 0      | 0      | 0      | 0      | 0      | 0      | 0      | 0      |
| Oscillibacter     | 1              | 20             | 0      | 0      | 0      | 0      | 1      | 0      | 0      | 0      | 0      | 1      | 0      | 0      | 0      | 0      | 0      | 0      | 0      | 0      |
| Owenweeksia       | 1              | 15             | 1      | 0      | 0      | 0      | 0      | 0      | 0      | 0      | 0      | 0      | 0      | 0      | 0      | 0      | 0      | 0      | 0      | 0      |
| Oxalobacteraceae  | 1              | 4              | 0      | 0      | 0      | 0      | 0      | 0      | 0      | 0      | 0      | 0      | 0      | 0      | 0      | 0      | 0      | 0      | 0      | 0      |
| Paenibacillus     | 2              | 152            | 0      | 0      | 0      | 0      | 0      | 1      | 0      | 0      | 0      | 1      | 1      | 0      | 0      | 0      | 0      | 0      | 0      | 0      |
| Paludibacter      | 2              | 67             | 0      | 0      | 0      | 0      | 0      | 0      | 0      | 0      | 0      | 0      | 0      | 0      | 0      | 0      | 0      | 0      | 0      | 0      |
| Pandoraea         | 1              | 18             | 0      | 0      | 0      | 0      | 0      | 0      | 0      | 0      | 0      | 0      | 0      | 0      | 0      | 0      | 1      | 0      | 0      | 0      |
| Pannonibacter     | 1              | 3              | 0      | 0      | 0      | 0      | 0      | 0      | 0      | 0      | 0      | 0      | 0      | 0      | 0      | 0      | 0      | 0      | 0      | 0      |



| Genus              | Cluster Number | Protein Counts | K03333 | K03379 | K03380 | K03381 | K03382 | K03383 | K03384 | K03391 | K03464 | K03518 | K03862 | K04098 | K04099 | K04100 | K04102 | K04105 | K04107 | K04110 |
|--------------------|----------------|----------------|--------|--------|--------|--------|--------|--------|--------|--------|--------|--------|--------|--------|--------|--------|--------|--------|--------|--------|
| Pantholops         | 1              | 23             | 0      | 0      | 0      | 0      | 0      | 0      | 0      | 0      | 0      | 0      | 0      | 0      | 0      | 0      | 0      | 0      | 0      | 0      |
| Pantoea            | 2              | 181            | 0      | 0      | 0      | 0      | 1      | 0      | 0      | 0      | 0      | 0      | 1      | 0      | 0      | 0      | 1      | 0      | 0      | 0      |
| Parabacteroides    | 2              | 64             | 0      | 0      | 0      | 0      | 0      | 0      | 0      | 0      | 0      | 0      | 0      | 0      | 0      | 0      | 0      | 0      | 0      | 0      |
| Parachlamydia      | 1              | 11             | 0      | 0      | 0      | 0      | 0      | 0      | 0      | 0      | 0      | 0      | 0      | 0      | 0      | 0      | 0      | 0      | 0      | 0      |
| Paracoccus         | 2              | 169            | 0      | 0      | 1      | 1      | 1      | 0      | 0      | 0      | 1      | 0      | 0      | 0      | 0      | 0      | 0      | 0      | 0      | 0      |
| Parvibaculum       | 3              | 117            | 0      | 1      | 0      | 0      | 0      | 0      | 0      | 0      | 0      | 1      | 0      | 0      | 0      | 0      | 0      | 0      | 0      | 0      |
| Parvularcula       | 2              | 72             | 1      | 0      | 0      | 0      | 1      | 0      | 0      | 0      | 0      | 0      | 0      | 0      | 0      | 0      | 0      | 0      | 0      | 0      |
| Pasteurella        | 2              | 85             | 0      | 0      | 0      | 0      | 0      | 0      | 0      | 0      | 0      | 0      | 0      | 0      | 0      | 0      | 0      | 0      | 0      | 0      |
| Pasteurellaceae    | 1              | 2              | 0      | 0      | 0      | 0      | 0      | 0      | 0      | 0      | 0      | 0      | 0      | 0      | 0      | 0      | 0      | 0      | 0      | 0      |
| Pectobacterium     | 1              | 44             | 0      | 0      | 0      | 0      | 0      | 0      | 0      | 0      | 0      | 0      | 0      | 0      | 0      | 0      | 0      | 0      | 0      | 0      |
| Pediococcus        | 1              | 43             | 0      | 0      | 0      | 0      | 0      | 0      | 0      | 0      | 0      | 0      | 0      | 0      | 0      | 0      | 0      | 0      | 0      | 0      |
| Pedobacter         | 2              | 88             | 0      | 0      | 0      | 0      | 0      | 0      | 0      | 0      | 0      | 0      | 0      | 0      | 0      | 0      | 0      | 0      | 0      | 0      |
| Pelagibaca         | 1              | 10             | 0      | 0      | 0      | 0      | 0      | 0      | 0      | 0      | 0      | 0      | 0      | 0      | 0      | 0      | 0      | 0      | 0      | 0      |
| Pelagibacterium    | 1              | 39             | 0      | 0      | 1      | 1      | 0      | 0      | 0      | 0      | 0      | 0      | 0      | 1      | 0      | 0      | 1      | 0      | 0      | 0      |
| Pelobacter         | 2              | 85             | 0      | 0      | 0      | 0      | 0      | 0      | 0      | 0      | 0      | 1      | 0      | 0      | 0      | 0      | 0      | 0      | 0      | 0      |
| Pelodictyon        | 2              | 62             | 0      | 0      | 0      | 0      | 0      | 0      | 0      | 0      | 0      | 0      | 0      | 0      | 0      | 0      | 0      | 0      | 0      | 0      |
| Pelosinus          | 1              | 1              | 0      | 0      | 0      | 0      | 0      | 0      | 0      | 0      | 0      | 0      | 0      | 0      | 0      | 0      | 0      | 0      | 0      | 0      |
| Pelotomaculum      | 2              | 60             | 0      | 0      | 0      | 0      | 0      | 0      | 0      | 0      | 0      | 1      | 0      | 0      | 0      | 0      | 0      | 0      | 0      | 0      |
| Peptostreptococcus | 1              | 1              | 0      | 0      | 0      | 0      | 0      | 0      | 0      | 0      | 0      | 0      | 0      | 0      | 0      | 0      | 0      | 0      | 0      | 0      |
| Persephonella      | 2              | 55             | 0      | 0      | 0      | 0      | 0      | 0      | 0      | 0      | 0      | 0      | 0      | 0      | 0      | 0      | 0      | 0      | 0      | 0      |
| Petrotoga          | 2              | 72             | 0      | 0      | 0      | 0      | 1      | 0      | 0      | 0      | 0      | 1      | 0      | 0      | 0      | 0      | 0      | 0      | 0      | 0      |
| Phaeobacter        | 2              | 55             | 0      | 0      | 0      | 0      | 1      | 0      | 0      | 0      | 0      | 1      | 0      | 0      | 0      | 0      | 0      | 0      | 0      | 0      |
| Phenylobacterium   | 3              | 103            | 0      | 0      | 0      | 0      | 0      | 0      | 0      | 0      | 0      | 0      | 0      | 0      | 0      | 0      | 0      | 0      | 0      | 0      |
| Photobacterium     | 2              | 119            | 0      | 0      | 0      | 0      | 1      | 0      | 0      | 0      | 0      | 1      | 0      | 0      | 0      | 0      | 0      | 0      | 0      | 0      |
| Photorhabdus       | 2              | 149            | 0      | 0      | 0      | 0      | 0      | 0      | 0      | 0      | 0      | 0      | 0      | 0      | 0      | 0      | 0      | 0      | 0      | 0      |
| Phycisphaera       | 1              | 9              | 0      | 0      | 0      | 0      | 0      | 0      | 0      | 0      | 0      | 0      | 0      | 0      | 0      | 0      | 0      | 0      | 0      | 0      |
| Phyllobacterium    | 1              | 6              | 0      | 0      | 0      | 0      | 0      | 0      | 0      | 0      | 0      | 0      | 0      | 0      | 0      | 0      | 0      | 0      | 0      | 0      |
| Picrophilus        | 1              | 15             | 0      | 0      | 0      | 0      | 0      | 0      | 0      | 0      | 0      | 1      | 0      | 0      | 0      | 0      | 0      | 0      | 0      | 0      |
| Pirellula          | 2              | 85             | 0      | 0      | 0      | 0      | 0      | 0      | 0      | 0      | 0      | 1      | 0      | 0      | 0      | 0      | 0      | 0      | 0      | 0      |
| Planctomyces       | 2              | 93             | 0      | 0      | 0      | 0      | 0      | 0      | 0      | 0      | 0      | 0      | 0      | 0      | 0      | 0      | 0      | 0      | 0      | 0      |
| Plautia            | 1              | 17             | 0      | 0      | 0      | 0      | 0      | 0      | 0      | 0      | 0      | 0      | 0      | 0      | 0      | 0      | 0      | 0      | 0      | 0      |
| Plesiomonas        | 1              | 4              | 0      | 0      | 0      | 0      | 0      | 0      | 0      | 0      | 0      | 0      | 0      | 0      | 0      | 0      | 0      | 0      | 0      | 0      |
| Pleurocapsa        | 1              | 23             | 0      | 0      | 0      | 0      | 0      | 0      | 0      | 0      | 0      | 0      | 0      | 0      | 0      | 0      | 0      | 0      | 0      | 0      |
| Polaribacter       | 2              | 74             | 0      | 0      | 0      | 0      | 0      | 0      | 0      | 0      | 0      | 0      | 0      | 0      | 0      | 0      | 0      | 0      | 0      | 0      |
| Polaromonas        | 3              | 238            | 0      | 0      | 0      | 1      | 0      | 0      | 0      | 0      | 1      | 1      | 1      | 1      | 0      | 1      | 1      | 0      | 0      | 1      |
| Polymorphum        | 3              | 173            | 0      | 0      | 1      | 1      | 1      | 0      | 0      | 0      | 0      | 1      | 1      | 0      | 1      | 0      | 1      | 0      | 0      | 0      |
| Polynucleobacter   | 1              | 19             | 0      | 0      | 0      | 0      | 0      | 0      | 0      | 0      | 0      | 0      | 0      | 0      | 0      | 0      | 0      | 0      | 0      | 0      |
| Ponticaulis        | 1              | 1              | 0      | 0      | 0      | 0      | 0      | 0      | 0      | 0      | 0      | 0      | 0      | 0      | 0      | 0      | 0      | 0      | 0      | 0      |
| Porphyromonas      | 2              | 63             | 0      | 0      | 0      | 0      | 0      | 0      | 0      | 0      | 0      | 0      | 0      | 0      | 0      | 0      | 0      | 0      | 0      | 0      |
| Prevotella         | 1              | 65             | 0      | 0      | 0      | 0      | 0      | 0      | 0      | 0      | 0      | 0      | 0      | 0      | 0      | 0      | 0      | 0      | 0      | 0      |
| Prochlorococcus    | 2              | 68             | 0      | 0      | 0      | 0      | 0      | 0      | 0      | 0      | 0      | 0      | 0      | 0      | 0      | 0      | 0      | 0      | 0      | 0      |
| Propionibacterium  | 1              | 62             | 0      | 0      | 0      | 0      | 0      | 0      | 0      | 0      | 0      | 0      | 0      | 0      | 0      | 0      | 0      | 0      | 0      | 0      |
| Prosthecochloris   | 1              | 16             | 0      | 0      | 0      | 0      | 0      | 0      | 0      | 0      | 0      | 0      | 0      | 0      | 0      | 0      | 0      | 0      | 0      | 0      |
| Proteobacteria     | 1              | 19             | 0      | 0      | 0      | 0      | 0      | 0      | 0      | 0      | 0      | 0      | 0      | 0      | 0      | 0      | 0      | 0      | 0      | 0      |
| Proteus            | 2              | 113            | 0      | 0      | 0      | 0      | 0      | 0      | 0      | 0      | 0      | 0      | 0      | 0      | 0      | 0      | 0      | 0      | 0      | 0      |
| Providencia        | 1              | 38             | 0      | 0      | 0      | 0      | 0      | 0      | 0      | 0      | 0      | 0      | 0      | 0      | 0      | 0      | 0      | 0      | 0      | 0      |
| Pseudaminobacter   | 1              | 10             | 0      | 0      | 0      | 0      | 0      | 0      | 0      | 0      | 0      | 0      | 0      | 0      | 0      | 0      | 0      | 0      | 0      | 0      |
| Pseudanabaena      | 1              | 11             | 0      | 0      | 0      | 0      | 0      | 0      | 0      | 0      | 0      | 0      | 0      | 0      | 0      | 0      | 0      | 0      | 0      | 0      |
| Pseudoalteromonas  | 2              | 188            | 0      | 0      | 0      | 0      | 1      | 0      | 0      | 0      | 0      | 0      | 1      | 0      | 0      | 1      | 0      | 0      | 0      | 0      |
| Pseudochrobactrum  | 1              | 7              | 0      | 0      | 0      | 0      | 0      | 0      | 0      | 0      | 0      | 0      | 0      | 0      | 0      | 0      | 0      | 0      | 0      | 0      |
| Pseudogulbenkiania | 1              | 40             | 0      | 0      | 0      | 1      | 0      | 0      | 0      | 0      | 1      | 0      | 0      | 0      | 1      | 0      | 0      | 0      | 0      | 0      |
| pseudomallei       | 3              | 131            | 0      | 0      | 0      | 0      | 0      | 0      | 0      | 0      | 1      | 0      | 0      | 0      | 0      | 0      | 0      | 0      | 0      | 0      |

| Genus                   | Cluster Number | Protein Counts | K03333 | K03379 | K03380 | K03381 | K03382 | K03383 | K03384 | K03391 | K03464 | K03518 | K03862 | K04098 | K04099 | K04100 | K04102 | K04105 | K04107 | K04110 |
|-------------------------|----------------|----------------|--------|--------|--------|--------|--------|--------|--------|--------|--------|--------|--------|--------|--------|--------|--------|--------|--------|--------|
| Pseudomonas             | 3              | 381            | 1      | 1      | 0      | 1      | 1      | 0      | 0      | 0      | 1      | 1      | 1      | 0      | 1      | 1      | 0      | 0      | 0      | 0      |
| Pseudonocardia          | 3              | 180            | 0      | 0      | 0      | 1      | 1      | 1      | 0      | 0      | 1      | 1      | 1      | 1      | 0      | 1      | 0      | 0      | 0      | 1      |
| Pseudorhodobacter       | 1              | 4              | 0      | 0      | 0      | 0      | 0      | 0      | 0      | 0      | 0      | 0      | 0      | 0      | 0      | 0      | 0      | 0      | 0      | 0      |
| Pseudovibrio            | 1              | 33             | 0      | 0      | 0      | 0      | 0      | 0      | 0      | 0      | 0      | 1      | 0      | 0      | 0      | 0      | 0      | 0      | 0      | 0      |
| Pseudoxanthomonas       | 2              | 124            | 0      | 0      | 0      | 0      | 0      | 0      | 0      | 0      | 0      | 0      | 1      | 0      | 0      | 0      | 0      | 0      | 0      | 0      |
| Psychrobacter           | 2              | 124            | 1      | 0      | 0      | 1      | 1      | 0      | 0      | 0      | 1      | 0      | 0      | 0      | 0      | 0      | 0      | 0      | 0      | 0      |
| Psychroflexus           | 1              | 22             | 1      | 0      | 0      | 0      | 0      | 0      | 0      | 0      | 0      | 0      | 0      | 0      | 0      | 0      | 0      | 0      | 0      | 0      |
| Psychromonas            | 2              | 110            | 0      | 0      | 0      | 0      | 0      | 0      | 0      | 0      | 0      | 0      | 0      | 0      | 0      | 0      | 0      | 0      | 0      | 0      |
| Pusillimonas            | 3              | 111            | 0      | 0      | 0      | 0      | 0      | 0      | 0      | 0      | 0      | 0      | 1      | 0      | 0      | 0      | 0      | 0      | 0      | 0      |
| Pyrobaculum             | 1              | 15             | 0      | 0      | 0      | 0      | 0      | 0      | 0      | 0      | 0      | 1      | 0      | 0      | 0      | 0      | 0      | 0      | 0      | 0      |
| Pyrococcus              | 1              | 10             | 0      | 0      | 0      | 0      | 0      | 0      | 0      | 0      | 0      | 0      | 0      | 0      | 0      | 0      | 0      | 0      | 0      | 0      |
| Pyrolobus               | 1              | 4              | 0      | 0      | 0      | 0      | 0      | 0      | 0      | 0      | 0      | 0      | 0      | 0      | 0      | 0      | 0      | 0      | 0      | 0      |
| Rahnella                | 2              | 143            | 0      | 0      | 0      | 0      | 1      | 0      | 0      | 0      | 0      | 0      | 0      | 0      | 1      | 0      | 1      | 0      | 0      | 0      |
| Ralstonia               | 3              | 332            | 1      | 1      | 0      | 1      | 1      | 0      | 0      | 0      | 1      | 1      | 1      | 1      | 1      | 0      | 1      | 0      | 0      | 1      |
| Ramlibacter             | 1              | 35             | 0      | 0      | 0      | 0      | 0      | 0      | 0      | 0      | 0      | 1      | 0      | 0      | 0      | 1      | 0      | 0      | 0      | 1      |
| Raoultella              | 2              | 139            | 0      | 0      | 0      | 1      | 1      | 0      | 0      | 0      | 1      | 1      | 1      | 0      | 1      | 0      | 0      | 0      | 0      | 0      |
| Raphidiopsis            | 1              | 5              | 0      | 0      | 0      | 0      | 0      | 0      | 0      | 0      | 0      | 0      | 0      | 0      | 0      | 0      | 0      | 0      | 0      | 0      |
| Reinekea                | 1              | 2              | 0      | 0      | 0      | 0      | 0      | 0      | 0      | 0      | 0      | 0      | 0      | 0      | 0      | 0      | 0      | 0      | 0      | 0      |
| Renibacterium           | 2              | 67             | 0      | 0      | 1      | 0      | 0      | 0      | 0      | 0      | 0      | 0      | 0      | 0      | 0      | 0      | 0      | 0      | 0      | 0      |
| Rhizobiaceae            | 1              | 3              | 0      | 0      | 0      | 0      | 0      | 0      | 0      | 0      | 0      | 0      | 0      | 0      | 0      | 0      | 0      | 0      | 0      | 0      |
| Rhizobiales             | 1              | 6              | 0      | 0      | 0      | 0      | 0      | 0      | 0      | 0      | 0      | 1      | 0      | 0      | 0      | 0      | 0      | 0      | 0      | 0      |
| Rhizobium               | 3              | 257            | 0      | 0      | 1      | 1      | 1      | 1      | 0      | 0      | 0      | 1      | 0      | 0      | 0      | 0      | 1      | 0      | 0      | 0      |
| Rhizobium/Agrobacterium | 2              | 87             | 0      | 0      | 1      | 1      | 0      | 0      | 0      | 0      | 0      | 0      | 0      | 0      | 0      | 0      | 0      | 0      | 0      | 0      |
| Rhodanobacter           | 1              | 21             | 0      | 0      | 0      | 0      | 0      | 0      | 0      | 0      | 0      | 0      | 0      | 0      | 0      | 0      | 0      | 0      | 0      | 0      |
| Rhodobacter             | 3              | 175            | 0      | 0      | 0      | 0      | 1      | 0      | 0      | 0      | 0      | 1      | 0      | 0      | 0      | 0      | 0      | 0      | 0      | 0      |
| Rhodobacteraceae        | 1              | 21             | 0      | 0      | 0      | 0      | 0      | 0      | 0      | 0      | 0      | 0      | 0      | 0      | 0      | 0      | 0      | 0      | 0      | 0      |
| Rhodobacterales         | 1              | 34             | 0      | 0      | 0      | 0      | 0      | 0      | 0      | 0      | 0      | 1      | 0      | 0      | 0      | 0      | 0      | 0      | 0      | 0      |
| Rhodococcus             | 2              | 292            | 1      | 1      | 0      | 1      | 1      | 1      | 1      | 1      | 1      | 1      | 1      | 1      | 0      | 0      | 1      | 0      | 0      | 0      |
| Rhodocyclaceae          | 1              | 7              | 0      | 0      | 0      | 0      | 0      | 0      | 0      | 0      | 0      | 0      | 0      | 0      | 0      | 0      | 0      | 0      | 0      | 0      |
| Rhodoferax              | 3              | 144            | 1      | 0      | 0      | 0      | 0      | 0      | 0      | 0      | 0      | 0      | 1      | 0      | 0      | 1      | 0      | 0      | 0      | 1      |
| Rhodomicrobium          | 2              | 103            | 0      | 0      | 0      | 0      | 0      | 0      | 0      | 0      | 0      | 0      | 0      | 0      | 0      | 0      | 0      | 0      | 0      | 1      |
| Rhodopirellula          | 2              | 87             | 0      | 0      | 0      | 0      | 0      | 0      | 0      | 0      | 0      | 0      | 0      | 0      | 0      | 0      | 0      | 0      | 0      | 0      |
| Rhodopseudomonas        | 3              | 246            | 0      | 0      | 0      | 0      | 0      | 0      | 0      | 0      | 0      | 1      | 1      | 0      | 0      | 1      | 0      | 1      | 1      | 1      |
| Rhodospirillum          | 2              | 121            | 0      | 0      | 0      | 0      | 0      | 0      | 0      | 0      | 0      | 1      | 0      | 0      | 0      | 0      | 0      | 0      | 0      | 1      |
| Rhodothermus            | 2              | 76             | 0      | 0      | 0      | 0      | 0      | 0      | 0      | 0      | 0      | 1      | 0      | 0      | 0      | 0      | 0      | 0      | 0      | 0      |
| Rhodovulum              | 1              | 4              | 0      | 0      | 0      | 0      | 0      | 0      | 0      | 0      | 0      | 0      | 0      | 0      | 0      | 0      | 0      | 0      | 0      | 0      |
| Richelia                | 1              | 2              | 0      | 0      | 0      | 0      | 0      | 0      | 0      | 0      | 0      | 0      | 0      | 0      | 0      | 0      | 0      | 0      | 0      | 0      |
| Rickettsia              | 2              | 43             | 0      | 0      | 0      | 0      | 0      | 0      | 0      | 0      | 0      | 0      | 0      | 0      | 0      | 0      | 0      | 0      | 0      | 0      |
| Rickettsiaceae          | 1              | 5              | 0      | 0      | 0      | 0      | 0      | 0      | 0      | 0      | 0      | 0      | 0      | 0      | 0      | 0      | 0      | 0      | 0      | 0      |
| Riemerella              | 2              | 61             | 0      | 0      | 0      | 0      | 0      | 0      | 0      | 0      | 0      | 0      | 0      | 0      | 0      | 0      | 0      | 0      | 0      | 0      |
| Rivularia               | 1              | 18             | 1      | 0      | 0      | 0      | 1      | 0      | 0      | 0      | 0      | 0      | 0      | 0      | 0      | 0      | 0      | 0      | 0      | 0      |
| Robiginitalea           | 2              | 83             | 0      | 0      | 0      | 0      | 0      | 0      | 0      | 0      | 0      | 0      | 0      | 0      | 0      | 0      | 0      | 0      | 0      | 0      |
| Roseburia               | 2              | 58             | 0      | 0      | 0      | 0      | 0      | 0      | 0      | 0      | 0      | 1      | 0      | 0      | 0      | 0      | 0      | 0      | 0      | 0      |
| Roseibium               | 1              | 3              | 0      | 0      | 0      | 0      | 0      | 0      | 0      | 0      | 0      | 0      | 0      | 0      | 0      | 0      | 0      | 0      | 0      | 0      |
| Roseiflexus             | 3              | 100            | 0      | 0      | 0      | 0      | 0      | 0      | 0      | 0      | 0      | 1      | 0      | 0      | 0      | 0      | 0      | 0      | 0      | 0      |
| Roseobacter             | 2              | 149            | 0      | 0      | 0      | 0      | 1      | 0      | 0      | 0      | 0      | 1      | 1      | 0      | 0      | 0      | 0      | 0      | 0      | 0      |
| Roseomonas              | 1              | 2              | 0      | 0      | 0      | 0      | 0      | 0      | 0      | 0      | 0      | 0      | 0      | 0      | 0      | 0      | 0      | 0      | 0      | 0      |
| Roseovarius             | 1              | 15             | 0      | 0      | 0      | 0      | 0      | 0      | 0      | 0      | 0      | 0      | 0      | 0      | 0      | 0      | 0      | 0      | 0      | 0      |
| Rothia                  | 1              | 44             | 0      | 0      | 0      | 0      | 0      | 0      | 0      | 0      | 0      | 0      | 0      | 0      | 0      | 0      | 0      | 0      | 0      | 0      |
| Rubrivivax              | 1              | 24             | 0      | 0      | 0      | 0      | 1      | 0      | 0      | 0      | 0      | 1      | 0      | 0      | 0      | 0      | 0      | 0      | 0      | 0      |
| Rubrobacter             | 3              | 117            | 0      | 0      | 1      | 0      | 1      | 0      | 0      | 0      | 0      | 1      | 0      | 0      | 0      | 0      | 0      | 0      | 0      | 0      |
| Ruegeria                | 2              | 189            | 0      | 0      | 0      | 0      | 1      | 0      | 0      | 0      | 0      | 1      | 0      | 0      | 0      | 0      | 0      | 1      | 0      | 0      |

| Genus             | Cluster Number | Protein Counts | K03333 | K03379 | K03380 | K03381 | K03382 | K03383 | K03384 | K03391 | K03464 | K03518 | K03862 | K04098 | K04099 | K04100 | K04102 | K04105 | K04107 | K04110 |
|-------------------|----------------|----------------|--------|--------|--------|--------|--------|--------|--------|--------|--------|--------|--------|--------|--------|--------|--------|--------|--------|--------|
| Ruminococcaceae   | 1              | 2              | 0      | 0      | 0      | 0      | 0      | 0      | 0      | 0      | 0      | 0      | 0      | 0      | 0      | 0      | 0      | 0      | 0      | 0      |
| Ruminococcus      | 2              | 101            | 0      | 0      | 0      | 0      | 0      | 0      | 0      | 0      | 0      | 1      | 0      | 0      | 0      | 0      | 0      | 0      | 0      | 0      |
| Runella           | 1              | 26             | 0      | 0      | 0      | 0      | 0      | 0      | 0      | 0      | 1      | 0      | 0      | 0      | 0      | 0      | 0      | 0      | 0      | 0      |
| Saccharomonospora | 2              | 132            | 1      | 0      | 0      | 1      | 0      | 1      | 0      | 0      | 1      | 1      | 1      | 0      | 0      | 1      | 0      | 0      | 0      | 0      |
| Saccharophagus    | 2              | 81             | 0      | 0      | 0      | 0      | 0      | 0      | 0      | 0      | 0      | 0      | 0      | 0      | 0      | 0      | 0      | 0      | 0      | 0      |
| Saccharopolyspora | 3              | 194            | 1      | 1      | 0      | 1      | 1      | 0      | 0      | 1      | 1      | 1      | 1      | 0      | 0      | 0      | 0      | 0      | 0      | 0      |
| Saccharothrix     | 1              | 32             | 1      | 0      | 0      | 1      | 1      | 0      | 0      | 0      | 0      | 1      | 0      | 0      | 0      | 0      | 0      | 0      | 0      | 0      |
| Sagittula         | 1              | 10             | 0      | 0      | 0      | 0      | 0      | 0      | 0      | 0      | 0      | 0      | 0      | 0      | 0      | 0      | 0      | 0      | 0      | 0      |
| Salinibacter      | 2              | 77             | 0      | 0      | 0      | 0      | 0      | 0      | 0      | 0      | 0      | 0      | 0      | 0      | 0      | 0      | 0      | 0      | 0      | 0      |
| Salinimonas       | 1              | 1              | 0      | 0      | 0      | 0      | 0      | 0      | 0      | 0      | 0      | 0      | 0      | 0      | 0      | 0      | 0      | 0      | 0      | 0      |
| Salinispora       | 3              | 127            | 1      | 0      | 0      | 0      | 0      | 0      | 0      | 0      | 0      | 0      | 0      | 0      | 0      | 0      | 0      | 0      | 0      | 0      |
| Salinivibrio      | 1              | 2              | 0      | 0      | 0      | 0      | 0      | 0      | 0      | 0      | 0      | 0      | 0      | 0      | 0      | 0      | 0      | 0      | 0      | 0      |
| Salmonella        | 2              | 151            | 0      | 0      | 0      | 0      | 0      | 0      | 0      | 0      | 0      | 0      | 0      | 0      | 0      | 0      | 0      | 0      | 0      | 0      |
| Sanguibacter      | 2              | 73             | 0      | 0      | 0      | 0      | 1      | 0      | 0      | 0      | 0      | 0      | 0      | 0      | 0      | 0      | 0      | 0      | 0      | 0      |
| Saprospira        | 1              | 13             | 0      | 0      | 0      | 0      | 0      | 0      | 0      | 0      | 0      | 0      | 0      | 0      | 0      | 0      | 0      | 0      | 0      | 0      |
| Scardovia         | 1              | 1              | 0      | 0      | 0      | 0      | 0      | 0      | 0      | 0      | 0      | 0      | 0      | 0      | 0      | 0      | 0      | 0      | 0      | 0      |
| Scytonema         | 1              | 10             | 0      | 0      | 0      | 0      | 0      | 0      | 0      | 0      | 0      | 0      | 0      | 0      | 0      | 0      | 0      | 0      | 0      | 0      |
| Sebaldella        | 2              | 69             | 0      | 0      | 0      | 0      | 1      | 0      | 0      | 0      | 0      | 1      | 0      | 0      | 0      | 0      | 0      | 0      | 0      | 0      |
| Segniliparus      | 2              | 85             | 1      | 0      | 0      | 0      | 0      | 0      | 0      | 0      | 0      | 0      | 0      | 0      | 0      | 0      | 0      | 0      | 0      | 0      |
| Selenomonas       | 2              | 57             | 0      | 0      | 0      | 0      | 0      | 0      | 0      | 0      | 0      | 0      | 0      | 0      | 0      | 0      | 0      | 0      | 0      | 0      |
| Serinicoccus      | 1              | 1              | 0      | 0      | 0      | 0      | 0      | 0      | 0      | 0      | 0      | 0      | 0      | 0      | 0      | 0      | 0      | 0      | 0      | 0      |
| Serratia          | 2              | 186            | 0      | 0      | 0      | 1      | 0      | 0      | 0      | 0      | 1      | 0      | 0      | 0      | 1      | 0      | 0      | 0      | 0      | 0      |
| Shewanella        | 3              | 214            | 0      | 0      | 0      | 0      | 0      | 0      | 0      | 0      | 0      | 1      | 0      | 0      | 0      | 0      | 0      | 0      | 0      | 0      |
| Shigella          | 2              | 172            | 0      | 0      | 0      | 0      | 0      | 0      | 0      | 0      | 0      | 0      | 0      | 0      | 0      | 0      | 0      | 0      | 0      | 0      |
| Shinella          | 1              | 2              | 0      | 0      | 0      | 0      | 0      | 0      | 0      | 0      | 0      | 0      | 0      | 0      | 0      | 0      | 0      | 0      | 0      | 0      |
| Sideroxydans      | 2              | 81             | 1      | 0      | 0      | 0      | 0      | 0      | 0      | 0      | 0      | 0      | 0      | 0      | 0      | 0      | 0      | 0      | 0      | 0      |
| Silicibacter      | 2              | 105            | 0      | 0      | 0      | 0      | 1      | 0      | 0      | 0      | 0      | 1      | 0      | 0      | 0      | 0      | 0      | 0      | 0      | 0      |
| Simiduia          | 1              | 18             | 0      | 0      | 0      | 0      | 0      | 0      | 0      | 0      | 0      | 0      | 0      | 0      | 0      | 0      | 0      | 0      | 0      | 0      |
| Simkania          | 1              | 6              | 0      | 0      | 0      | 0      | 0      | 0      | 0      | 0      | 0      | 0      | 0      | 0      | 0      | 0      | 0      | 0      | 0      | 0      |
| Simonsiella       | 1              | 2              | 0      | 0      | 0      | 0      | 0      | 0      | 0      | 0      | 0      | 0      | 0      | 0      | 0      | 0      | 0      | 0      | 0      | 0      |
| Singulisphaera    | 1              | 18             | 0      | 0      | 0      | 1      | 0      | 0      | 0      | 0      | 0      | 0      | 0      | 0      | 0      | 0      | 0      | 0      | 0      | 0      |
| Sinorhizobium     | 3              | 207            | 0      | 0      | 0      | 1      | 0      | 0      | 0      | 0      | 1      | 1      | 0      | 0      | 0      | 0      | 0      | 0      | 0      | 0      |
| Slackia           | 2              | 46             | 0      | 0      | 0      | 0      | 0      | 0      | 0      | 0      | 0      | 0      | 0      | 0      | 0      | 0      | 0      | 0      | 0      | 0      |
| Smaragdicoccus    | 1              | 3              | 0      | 0      | 0      | 0      | 0      | 0      | 0      | 0      | 0      | 0      | 0      | 0      | 0      | 0      | 0      | 0      | 0      | 0      |
| Sodalis           | 2              | 71             | 0      | 0      | 0      | 0      | 0      | 0      | 0      | 0      | 0      | 0      | 0      | 0      | 0      | 0      | 0      | 0      | 0      | 0      |
| Solibacillus      | 1              | 23             | 0      | 0      | 0      | 0      | 0      | 0      | 0      | 0      | 0      | 0      | 0      | 0      | 0      | 0      | 0      | 0      | 0      | 0      |
| Solitaea          | 1              | 13             | 0      | 0      | 0      | 0      | 0      | 0      | 0      | 0      | 0      | 0      | 0      | 0      | 0      | 0      | 0      | 0      | 0      | 0      |
| Sorangium         | 3              | 115            | 1      | 1      | 0      | 0      | 0      | 0      | 0      | 0      | 0      | 1      | 0      | 0      | 0      | 0      | 0      | 0      | 0      | 0      |
| Sphaerobacter     | 2              | 100            | 0      | 0      | 0      | 0      | 0      | 0      | 0      | 0      | 0      | 1      | 0      | 0      | 0      | 0      | 0      | 0      | 0      | 0      |
| Sphaerochaeta     | 1              | 42             | 0      | 0      | 0      | 0      | 1      | 0      | 0      | 0      | 0      | 1      | 0      | 0      | 0      | 0      | 0      | 0      | 0      | 0      |
| Sphingobacterium  | 3              | 85             | 0      | 0      | 0      | 0      | 0      | 0      | 0      | 0      | 0      | 0      | 0      | 0      | 0      | 0      | 0      | 0      | 0      | 0      |
| Sphingobium       | 1              | 179            | 0      | 0      | 0      | 1      | 0      | 0      | 0      | 0      | 1      | 0      | 1      | 1      | 1      | 1      | 0      | 0      | 0      | 0      |
| Sphingomonadaceae | 1              | 15             | 0      | 0      | 0      | 0      | 0      | 0      | 0      | 0      | 0      | 0      | 1      | 0      | 0      | 0      | 0      | 0      | 0      | 0      |
| Sphingomonas      | 2              | 220            | 0      | 0      | 0      | 1      | 0      | 0      | 0      | 0      | 1      | 1      | 1      | 1      | 1      | 1      | 0      | 0      | 0      | 1      |
| Sphingopyxis      | 3              | 99             | 0      | 0      | 0      | 0      | 0      | 0      | 0      | 0      | 0      | 0      | 0      | 0      | 0      | 0      | 0      | 0      | 0      | 0      |
| Spirochaeta       | 2              | 103            | 0      | 0      | 0      | 0      | 1      | 0      | 0      | 0      | 0      | 1      | 0      | 0      | 0      | 0      | 0      | 0      | 0      | 0      |
| Spiroplasma       | 1              | 6              | 0      | 0      | 0      | 0      | 0      | 0      | 0      | 0      | 0      | 0      | 0      | 0      | 0      | 0      | 0      | 0      | 0      | 0      |
| Spirosoma         | 2              | 107            | 0      | 0      | 0      | 0      | 0      | 0      | 0      | 0      | 0      | 0      | 0      | 0      | 0      | 0      | 0      | 0      | 0      | 0      |
| Stackebrandtia    | 2              | 110            | 1      | 0      | 0      | 0      | 1      | 0      | 0      | 0      | 0      | 1      | 0      | 0      | 0      | 0      | 0      | 0      | 0      | 0      |
| Stanieria         | 1              | 17             | 0      | 0      | 0      | 0      | 0      | 0      | 0      | 0      | 0      | 0      | 0      | 0      | 0      | 0      | 0      | 0      | 0      | 0      |
| Staphylococcus    | 2              | 108            | 0      | 0      | 0      | 0      | 0      | 0      | 0      | 0      | 0      | 0      | 0      | 0      | 0      | 0      | 0      | 0      | 0      | 0      |
| Staphylothermus   | 1              | 12             | 0      | 0      | 0      | 0      | 0      | 0      | 0      | 0      | 0      | 1      | 0      | 0      | 0      | 0      | 0      | 0      | 0      | 0      |

| Genus                  | Cluster Number | Protein Counts | K03333 | K03379 | K03380 | K03381 | K03382 | K03383 | K03384 | K03391 | K03464 | K03518 | K03862 | K04098 | K04099 | K04100 | K04102 | K04105 | K04107 | K04110 |
|------------------------|----------------|----------------|--------|--------|--------|--------|--------|--------|--------|--------|--------|--------|--------|--------|--------|--------|--------|--------|--------|--------|
| Stappia                | 1              | 2              | 0      | 0      | 0      | 0      | 0      | 0      | 0      | 0      | 0      | 0      | 0      | 0      | 0      | 0      | 0      | 0      | 0      | 0      |
| Starkeya               | 3              | 134            | 0      | 0      | 0      | 0      | 1      | 0      | 0      | 0      | 0      | 1      | 0      | 0      | 0      | 0      | 0      | 0      | 0      | 0      |
| Stenotrophomonas       | 3              | 104            | 0      | 0      | 0      | 1      | 0      | 0      | 0      | 0      | 0      | 0      | 0      | 0      | 0      | 0      | 0      | 0      | 0      | 0      |
| Stigmatella            | 3              | 129            | 1      | 0      | 0      | 0      | 0      | 0      | 0      | 0      | 0      | 1      | 1      | 0      | 0      | 0      | 0      | 0      | 0      | 0      |
| Streptobacillus        | 1              | 38             | 0      | 0      | 0      | 0      | 0      | 0      | 0      | 0      | 0      | 0      | 0      | 0      | 0      | 0      | 0      | 0      | 0      | 0      |
| Streptococcus          | 2              | 121            | 0      | 0      | 0      | 0      | 0      | 0      | 0      | 0      | 0      | 0      | 0      | 0      | 0      | 0      | 0      | 0      | 0      | 0      |
| Streptomyces           | 2              | 253            | 1      | 0      | 0      | 1      | 1      | 0      | 0      | 0      | 1      | 1      | 1      | 1      | 0      | 0      | 1      | 0      | 0      | 1      |
| Streptosporangium      | 3              | 148            | 1      | 0      | 0      | 0      | 1      | 1      | 0      | 0      | 0      | 1      | 0      | 0      | 0      | 1      | 0      | 0      | 0      | 0      |
| Strigomonas            | 1              | 2              | 0      | 0      | 0      | 0      | 0      | 0      | 0      | 0      | 0      | 0      | 0      | 0      | 0      | 0      | 0      | 0      | 0      | 0      |
| Sulfitobacter          | 1              | 10             | 0      | 0      | 0      | 0      | 0      | 0      | 0      | 0      | 0      | 0      | 0      | 0      | 0      | 0      | 0      | 0      | 0      | 0      |
| Sulfobacillus          | 1              | 30             | 0      | 0      | 0      | 0      | 0      | 1      | 0      | 0      | 0      | 1      | 0      | 0      | 0      | 0      | 0      | 0      | 0      | 0      |
| Sulfolobus             | 1              | 23             | 0      | 0      | 0      | 0      | 0      | 0      | 0      | 0      | 0      | 1      | 0      | 0      | 0      | 0      | 0      | 0      | 0      | 0      |
| Sulfuricurvum          | 2              | 67             | 0      | 0      | 0      | 0      | 0      | 0      | 0      | 0      | 0      | 0      | 0      | 0      | 0      | 0      | 0      | 0      | 0      | 0      |
| Sulfurihydrogenibium   | 2              | 55             | 0      | 0      | 0      | 0      | 0      | 0      | 0      | 0      | 0      | 0      | 0      | 0      | 0      | 0      | 0      | 0      | 0      | 0      |
| Sulfurimonas           | 2              | 60             | 0      | 0      | 0      | 0      | 0      | 0      | 0      | 0      | 0      | 0      | 0      | 0      | 0      | 0      | 0      | 0      | 0      | 0      |
| Sulfurospirillum       | 1              | 48             | 0      | 0      | 0      | 0      | 0      | 0      | 0      | 0      | 0      | 0      | 0      | 0      | 0      | 0      | 0      | 0      | 0      | 0      |
| Sulfurovum             | 2              | 48             | 0      | 0      | 0      | 0      | 0      | 0      | 0      | 0      | 0      | 0      | 0      | 0      | 0      | 0      | 0      | 0      | 0      | 0      |
| Symbiobacterium        | 2              | 68             | 0      | 0      | 0      | 0      | 0      | 0      | 0      | 0      | 0      | 0      | 0      | 0      | 0      | 0      | 0      | 0      | 0      | 0      |
| Synechococcus          | 1              | 34             | 1      | 0      | 0      | 0      | 1      | 0      | 0      | 0      | 0      | 0      | 0      | 0      | 0      | 0      | 0      | 0      | 0      | 0      |
| Synechocystis          | 1              | 40             | 0      | 0      | 0      | 0      | 0      | 0      | 0      | 0      | 0      | 0      | 0      | 0      | 0      | 0      | 0      | 0      | 0      | 0      |
| Synergistetes          | 1              | 27             | 0      | 0      | 0      | 0      | 0      | 0      | 0      | 0      | 0      | 1      | 0      | 0      | 0      | 0      | 0      | 0      | 0      | 0      |
| Syntrophobacter        | 2              | 101            | 0      | 0      | 0      | 0      | 0      | 0      | 0      | 0      | 0      | 1      | 0      | 0      | 0      | 0      | 0      | 0      | 0      | 0      |
| Syntrophobotulus       | 2              | 71             | 0      | 0      | 0      | 0      | 0      | 0      | 0      | 0      | 0      | 0      | 0      | 0      | 0      | 0      | 0      | 0      | 0      | 0      |
| Syntrophomonas         | 2              | 58             | 0      | 0      | 0      | 0      | 0      | 0      | 0      | 0      | 0      | 1      | 0      | 0      | 0      | 0      | 0      | 0      | 0      | 0      |
| Syntrophothermus       | 2              | 60             | 0      | 0      | 0      | 0      | 0      | 0      | 0      | 0      | 0      | 0      | 0      | 0      | 0      | 0      | 0      | 0      | 0      | 0      |
| Syntrophus             | 2              | 66             | 0      | 0      | 0      | 0      | 0      | 0      | 0      | 0      | 0      | 0      | 0      | 0      | 0      | 0      | 0      | 0      | 0      | 1      |
| Tannerella             | 1              | 8              | 0      | 0      | 0      | 0      | 0      | 0      | 0      | 0      | 0      | 0      | 0      | 0      | 0      | 0      | 0      | 0      | 0      | 0      |
| Taylorella             | 1              | 43             | 0      | 0      | 0      | 0      | 0      | 0      | 0      | 0      | 0      | 0      | 0      | 0      | 0      | 0      | 0      | 0      | 0      | 0      |
| Tepidanaerobacter      | 2              | 55             | 0      | 0      | 0      | 0      | 0      | 0      | 0      | 0      | 0      | 0      | 0      | 0      | 0      | 0      | 0      | 0      | 0      | 0      |
| Teredinibacter         | 2              | 109            | 0      | 0      | 0      | 0      | 1      | 0      | 0      | 0      | 0      | 0      | 0      | 0      | 0      | 0      | 0      | 0      | 0      | 0      |
| Terrabacter            | 1              | 1              | 0      | 0      | 0      | 0      | 0      | 0      | 0      | 0      | 0      | 0      | 0      | 0      | 0      | 0      | 0      | 0      | 0      | 0      |
| Terriglobus            | 2              | 83             | 0      | 0      | 0      | 0      | 0      | 0      | 0      | 0      | 0      | 1      | 1      | 0      | 0      | 0      | 0      | 0      | 0      | 0      |
| Tetragenococcus        | 1              | 12             | 0      | 0      | 0      | 0      | 0      | 0      | 0      | 0      | 0      | 0      | 0      | 0      | 0      | 0      | 0      | 0      | 0      | 0      |
| Thalassiobium          | 1              | 11             | 0      | 0      | 0      | 0      | 0      | 0      | 0      | 0      | 0      | 0      | 1      | 0      | 0      | 0      | 0      | 0      | 0      | 0      |
| Thalassobacter         | 1              | 9              | 0      | 0      | 0      | 0      | 0      | 0      | 0      | 0      | 0      | 0      | 1      | 0      | 0      | 0      | 0      | 0      | 0      | 0      |
| Thalassolithus         | 1              | 12             | 1      | 0      | 0      | 0      | 1      | 0      | 0      | 0      | 0      | 0      | 0      | 0      | 0      | 0      | 0      | 0      | 0      | 0      |
| Thalassospira          | 1              | 2              | 0      | 0      | 0      | 0      | 0      | 0      | 0      | 0      | 0      | 0      | 0      | 0      | 0      | 0      | 0      | 0      | 0      | 0      |
| Thauera                | 1              | 111            | 0      | 0      | 0      | 0      | 0      | 0      | 0      | 0      | 0      | 0      | 0      | 0      | 0      | 1      | 0      | 0      | 1      | 1      |
| Thermacetogenium       | 1              | 7              | 0      | 0      | 0      | 0      | 0      | 0      | 0      | 0      | 0      | 0      | 0      | 0      | 0      | 0      | 0      | 0      | 0      | 0      |
| Thermaerobacter        | 2              | 79             | 0      | 0      | 0      | 0      | 0      | 0      | 0      | 0      | 0      | 1      | 0      | 0      | 0      | 0      | 0      | 0      | 0      | 0      |
| Thermanaerovibrio      | 2              | 58             | 0      | 0      | 0      | 0      | 0      | 0      | 0      | 0      | 0      | 1      | 0      | 0      | 0      | 0      | 0      | 0      | 0      | 0      |
| Thermincola            | 2              | 62             | 0      | 0      | 0      | 0      | 0      | 0      | 0      | 0      | 0      | 0      | 0      | 0      | 0      | 0      | 0      | 0      | 0      | 0      |
| Thermoanaerobacter     | 2              | 76             | 0      | 0      | 0      | 0      | 0      | 0      | 0      | 0      | 0      | 0      | 0      | 0      | 0      | 0      | 0      | 0      | 0      | 0      |
| Thermoanaerobacterium  | 2              | 64             | 0      | 0      | 0      | 0      | 0      | 0      | 0      | 0      | 0      | 0      | 0      | 0      | 0      | 0      | 0      | 0      | 0      | 0      |
| Thermobacillus         | 1              | 11             | 0      | 0      | 0      | 0      | 0      | 0      | 0      | 0      | 0      | 0      | 0      | 0      | 0      | 0      | 0      | 0      | 0      | 0      |
| Thermobaculum          | 2              | 62             | 0      | 0      | 0      | 0      | 0      | 0      | 0      | 0      | 0      | 1      | 0      | 0      | 0      | 0      | 0      | 0      | 0      | 0      |
| Thermobifida           | 2              | 72             | 1      | 0      | 0      | 0      | 0      | 0      | 0      | 0      | 0      | 1      | 0      | 0      | 0      | 0      | 0      | 0      | 0      | 0      |
| Thermobispora          | 2              | 109            | 1      | 0      | 0      | 0      | 1      | 1      | 0      | 0      | 0      | 1      | 0      | 0      | 0      | 0      | 0      | 0      | 0      | 0      |
| Thermococcus           | 1              | 13             | 0      | 0      | 0      | 0      | 0      | 0      | 0      | 0      | 0      | 0      | 0      | 0      | 0      | 0      | 0      | 0      | 0      | 0      |
| Thermocrinis           | 2              | 60             | 0      | 0      | 0      | 0      | 0      | 0      | 0      | 0      | 0      | 0      | 0      | 0      | 0      | 0      | 0      | 0      | 0      | 0      |
| Thermodesulfator       | 1              | 10             | 0      | 0      | 0      | 0      | 0      | 0      | 0      | 0      | 0      | 0      | 0      | 0      | 0      | 0      | 0      | 0      | 0      | 0      |
| Thermodesulfobacterium | 1              | 9              | 0      | 0      | 0      | 0      | 0      | 0      | 0      | 0      | 0      | 0      | 0      | 0      | 0      | 0      | 0      | 0      | 0      | 0      |

| Genus                       | Cluster Number | Protein Counts | K03333 | K03379 | K03380 | K03381 | K03382 | K03383 | K03384 | K03391 | K03464 | K03518 | K03862 | K04098 | K04099 | K04100 | K04102 | K04105 | K04107 | K04110 |
|-----------------------------|----------------|----------------|--------|--------|--------|--------|--------|--------|--------|--------|--------|--------|--------|--------|--------|--------|--------|--------|--------|--------|
| <b>Thermodesulfobium</b>    | 1              | 13             | 0      | 0      | 0      | 0      | 0      | 0      | 0      | 0      | 0      | 0      | 0      | 0      | 0      | 0      | 0      | 0      | 0      | 0      |
| <b>Thermodesulfobivrio</b>  | 2              | 60             | 0      | 0      | 0      | 0      | 0      | 0      | 0      | 0      | 0      | 0      | 0      | 0      | 0      | 0      | 0      | 0      | 0      | 0      |
| <b>Thermofilum</b>          | 1              | 9              | 0      | 0      | 0      | 0      | 0      | 0      | 0      | 0      | 0      | 0      | 0      | 0      | 0      | 0      | 0      | 0      | 0      | 0      |
| <b>Thermogladus</b>         | 1              | 7              | 0      | 0      | 0      | 0      | 0      | 0      | 0      | 0      | 0      | 1      | 0      | 0      | 0      | 0      | 0      | 0      | 0      | 0      |
| <b>Thermomicrobium</b>      | 2              | 92             | 0      | 0      | 0      | 0      | 0      | 0      | 0      | 0      | 0      | 1      | 0      | 0      | 0      | 0      | 0      | 0      | 0      | 0      |
| <b>Thermomonospora</b>      | 2              | 125            | 1      | 0      | 0      | 0      | 0      | 0      | 0      | 0      | 0      | 1      | 0      | 0      | 0      | 0      | 0      | 0      | 0      | 0      |
| <b>Thermoplasma</b>         | 1              | 11             | 0      | 0      | 0      | 0      | 0      | 0      | 0      | 0      | 0      | 0      | 0      | 0      | 0      | 0      | 0      | 0      | 0      | 0      |
| <b>Thermoplasmatales</b>    | 1              | 6              | 0      | 0      | 0      | 0      | 0      | 0      | 0      | 0      | 0      | 0      | 0      | 0      | 0      | 0      | 0      | 0      | 0      | 0      |
| <b>Thermoproteus</b>        | 1              | 12             | 0      | 0      | 0      | 0      | 0      | 0      | 0      | 0      | 0      | 1      | 0      | 0      | 0      | 0      | 0      | 0      | 0      | 0      |
| <b>Thermosediminibacter</b> | 2              | 64             | 0      | 0      | 0      | 0      | 0      | 0      | 0      | 0      | 0      | 0      | 0      | 0      | 0      | 0      | 0      | 0      | 0      | 0      |
| <b>Thermosipho</b>          | 2              | 70             | 0      | 0      | 0      | 0      | 1      | 0      | 0      | 0      | 0      | 1      | 0      | 0      | 0      | 0      | 0      | 0      | 0      | 0      |
| <b>Thermosphaera</b>        | 1              | 10             | 0      | 0      | 0      | 0      | 0      | 0      | 0      | 0      | 0      | 1      | 0      | 0      | 0      | 0      | 0      | 0      | 0      | 0      |
| <b>Thermosynechococcus</b>  | 1              | 6              | 0      | 0      | 0      | 0      | 0      | 0      | 0      | 0      | 0      | 0      | 0      | 0      | 0      | 0      | 0      | 0      | 0      | 0      |
| <b>Thermotoga</b>           | 2              | 80             | 0      | 0      | 0      | 0      | 0      | 0      | 0      | 0      | 0      | 0      | 0      | 0      | 0      | 0      | 0      | 0      | 0      | 0      |
| <b>Thermovibrio</b>         | 2              | 58             | 0      | 0      | 0      | 0      | 0      | 0      | 0      | 0      | 0      | 0      | 0      | 0      | 0      | 0      | 0      | 0      | 0      | 0      |
| <b>Thermovirga</b>          | 1              | 9              | 0      | 0      | 0      | 0      | 0      | 0      | 0      | 0      | 0      | 0      | 0      | 0      | 0      | 0      | 0      | 0      | 0      | 0      |
| <b>Thermus</b>              | 2              | 107            | 0      | 0      | 0      | 0      | 0      | 0      | 0      | 0      | 0      | 0      | 0      | 0      | 0      | 0      | 0      | 0      | 0      | 0      |
| <b>Thioalkalimicrobium</b>  | 1              | 4              | 0      | 0      | 0      | 0      | 0      | 0      | 0      | 0      | 0      | 0      | 0      | 0      | 0      | 0      | 0      | 0      | 0      | 0      |
| <b>Thioalkalivibrio</b>     | 2              | 91             | 0      | 0      | 0      | 0      | 0      | 0      | 0      | 0      | 0      | 0      | 0      | 0      | 0      | 0      | 0      | 0      | 0      | 0      |
| <b>Thiobaca</b>             | 1              | 2              | 0      | 0      | 0      | 0      | 0      | 0      | 0      | 0      | 0      | 0      | 0      | 0      | 0      | 0      | 0      | 0      | 0      | 0      |
| <b>Thiobacillus</b>         | 2              | 67             | 0      | 0      | 0      | 0      | 0      | 0      | 0      | 0      | 0      | 0      | 0      | 0      | 0      | 0      | 0      | 0      | 0      | 0      |
| <b>Thiocapsa</b>            | 1              | 2              | 0      | 0      | 0      | 0      | 0      | 0      | 0      | 0      | 0      | 0      | 0      | 0      | 0      | 0      | 0      | 0      | 0      | 0      |
| <b>Thiocystis</b>           | 1              | 11             | 0      | 0      | 0      | 0      | 0      | 0      | 0      | 0      | 0      | 0      | 0      | 0      | 0      | 0      | 0      | 0      | 0      | 0      |
| <b>Thioflavococcus</b>      | 1              | 13             | 0      | 0      | 0      | 0      | 0      | 0      | 0      | 0      | 0      | 0      | 0      | 0      | 0      | 0      | 0      | 0      | 0      | 0      |
| <b>Thiomicrospira</b>       | 2              | 50             | 0      | 0      | 0      | 0      | 0      | 0      | 0      | 0      | 0      | 0      | 0      | 0      | 0      | 0      | 0      | 0      | 0      | 0      |
| <b>Thiomonas</b>            | 2              | 85             | 0      | 0      | 0      | 0      | 1      | 0      | 0      | 0      | 0      | 0      | 0      | 0      | 0      | 1      | 0      | 0      | 0      | 1      |
| <b>Thiorhodococcus</b>      | 1              | 2              | 0      | 0      | 0      | 0      | 0      | 0      | 0      | 0      | 0      | 0      | 0      | 0      | 0      | 0      | 0      | 0      | 0      | 0      |
| <b>Thiothrix</b>            | 1              | 2              | 0      | 0      | 0      | 0      | 0      | 0      | 0      | 0      | 0      | 0      | 0      | 0      | 0      | 0      | 0      | 0      | 0      | 0      |
| <b>Tistrella</b>            | 1              | 42             | 0      | 0      | 0      | 0      | 0      | 0      | 0      | 0      | 0      | 1      | 0      | 0      | 0      | 1      | 0      | 0      | 0      | 0      |
| <b>Tolumonas</b>            | 2              | 100            | 0      | 0      | 0      | 0      | 0      | 0      | 0      | 0      | 0      | 0      | 0      | 0      | 0      | 0      | 0      | 0      | 0      | 0      |
| <b>Transposon</b>           | 1              | 2              | 0      | 0      | 0      | 0      | 0      | 0      | 0      | 0      | 0      | 0      | 0      | 0      | 0      | 0      | 0      | 0      | 0      | 0      |
| <b>Treponema</b>            | 1              | 63             | 0      | 0      | 0      | 0      | 0      | 0      | 0      | 0      | 0      | 1      | 0      | 0      | 0      | 0      | 0      | 0      | 0      | 0      |
| <b>Trichodesmium</b>        | 2              | 71             | 0      | 0      | 0      | 0      | 0      | 0      | 0      | 0      | 0      | 0      | 0      | 0      | 0      | 0      | 0      | 0      | 0      | 0      |
| <b>Trichormus</b>           | 1              | 12             | 0      | 0      | 0      | 0      | 0      | 0      | 0      | 0      | 0      | 0      | 0      | 0      | 0      | 0      | 0      | 0      | 0      | 0      |
| <b>Tropheryma</b>           | 2              | 22             | 0      | 0      | 0      | 0      | 0      | 0      | 0      | 0      | 0      | 0      | 0      | 0      | 0      | 0      | 0      | 0      | 0      | 0      |
| <b>Truepera</b>             | 2              | 104            | 0      | 0      | 0      | 0      | 0      | 0      | 0      | 0      | 0      | 0      | 0      | 0      | 0      | 0      | 0      | 0      | 0      | 0      |
| <b>Tsukamurella</b>         | 2              | 123            | 1      | 0      | 0      | 0      | 0      | 0      | 0      | 0      | 0      | 0      | 0      | 0      | 0      | 0      | 0      | 0      | 0      | 0      |
| <b>Turneriella</b>          | 1              | 16             | 1      | 0      | 0      | 0      | 0      | 0      | 0      | 0      | 0      | 0      | 0      | 0      | 0      | 0      | 0      | 0      | 0      | 0      |
| <b>Uliginosibacterium</b>   | 1              | 2              | 0      | 0      | 0      | 0      | 0      | 0      | 0      | 0      | 0      | 0      | 0      | 0      | 0      | 0      | 0      | 0      | 0      | 0      |
| <b>Ureaplasma</b>           | 1              | 24             | 0      | 0      | 0      | 0      | 0      | 0      | 0      | 0      | 0      | 0      | 0      | 0      | 0      | 0      | 0      | 0      | 0      | 0      |
| <b>Ureibacillus</b>         | 1              | 2              | 0      | 0      | 0      | 0      | 0      | 0      | 0      | 0      | 0      | 0      | 0      | 0      | 0      | 0      | 0      | 0      | 0      | 0      |
| <b>Variovorax</b>           | 3              | 187            | 0      | 0      | 0      | 0      | 1      | 0      | 0      | 0      | 1      | 1      | 1      | 1      | 1      | 0      | 0      | 0      | 0      | 1      |
| <b>Veillonella</b>          | 1              | 54             | 0      | 0      | 0      | 0      | 0      | 0      | 0      | 0      | 0      | 1      | 0      | 0      | 0      | 0      | 0      | 0      | 0      | 0      |
| <b>Verminephrobacter</b>    | 3              | 188            | 0      | 0      | 0      | 0      | 0      | 0      | 0      | 0      | 0      | 1      | 1      | 1      | 1      | 1      | 1      | 0      | 0      | 1      |
| <b>Verrucosispora</b>       | 3              | 126            | 1      | 0      | 0      | 0      | 0      | 0      | 0      | 0      | 0      | 0      | 1      | 0      | 0      | 0      | 0      | 0      | 0      | 0      |
| <b>Vibrio</b>               | 2              | 195            | 0      | 0      | 0      | 1      | 1      | 0      | 0      | 0      | 1      | 0      | 0      | 0      | 0      | 1      | 0      | 0      | 0      | 0      |
| <b>Vibrionales</b>          | 1              | 46             | 0      | 0      | 0      | 0      | 0      | 0      | 0      | 0      | 0      | 0      | 0      | 0      | 0      | 0      | 0      | 0      | 0      | 0      |
| <b>Vitreoscilla</b>         | 1              | 1              | 0      | 0      | 0      | 0      | 0      | 0      | 0      | 0      | 0      | 0      | 0      | 0      | 0      | 0      | 0      | 0      | 0      | 0      |
| <b>Vulcanisaeta</b>         | 1              | 14             | 0      | 0      | 0      | 0      | 0      | 0      | 0      | 0      | 0      | 1      | 0      | 0      | 0      | 0      | 0      | 0      | 0      | 0      |
| <b>Waddlia</b>              | 2              | 68             | 0      | 0      | 0      | 0      | 0      | 0      | 0      | 0      | 0      | 0      | 0      | 0      | 0      | 0      | 0      | 0      | 0      | 0      |
| <b>Wautersia</b>            | 1              | 2              | 0      | 0      | 0      | 0      | 0      | 0      | 0      | 0      | 0      | 0      | 0      | 0      | 0      | 0      | 0      | 0      | 0      | 0      |
| <b>Weeksella</b>            | 2              | 65             | 1      | 0      | 0      | 0      | 0      | 0      | 0      | 0      | 0      | 0      | 0      | 0      | 0      | 0      | 0      | 0      | 0      | 0      |

| Genus             | Cluster Number | Protein Counts | K03333 | K03379 | K03380 | K03381 | K03382 | K03383 | K03384 | K03391 | K03464 | K03518 | K03862 | K04098 | K04099 | K04100 | K04102 | K04105 | K04107 | K04110 |
|-------------------|----------------|----------------|--------|--------|--------|--------|--------|--------|--------|--------|--------|--------|--------|--------|--------|--------|--------|--------|--------|--------|
| Weissella         | 1              | 14             | 0      | 0      | 0      | 0      | 0      | 0      | 0      | 0      | 0      | 0      | 0      | 0      | 0      | 0      | 0      | 0      | 0      | 0      |
| Wenxinia          | 1              | 2              | 0      | 0      | 0      | 0      | 0      | 0      | 0      | 0      | 0      | 0      | 0      | 0      | 0      | 0      | 0      | 0      | 0      | 0      |
| Wigglesworthia    | 1              | 29             | 0      | 0      | 0      | 0      | 0      | 0      | 0      | 0      | 0      | 0      | 0      | 0      | 0      | 0      | 0      | 0      | 0      | 0      |
| Wolbachia         | 1              | 32             | 0      | 0      | 0      | 0      | 0      | 0      | 0      | 0      | 0      | 0      | 0      | 0      | 0      | 0      | 0      | 0      | 0      | 0      |
| Wolinella         | 2              | 51             | 0      | 0      | 0      | 0      | 0      | 0      | 0      | 0      | 0      | 0      | 0      | 0      | 0      | 0      | 0      | 0      | 0      | 0      |
| Xanthobacter      | 3              | 176            | 0      | 0      | 0      | 1      | 1      | 0      | 0      | 0      | 1      | 1      | 0      | 0      | 0      | 0      | 0      | 0      | 0      | 0      |
| Xanthobacteraceae | 1              | 4              | 0      | 0      | 0      | 0      | 0      | 0      | 0      | 0      | 0      | 0      | 0      | 0      | 0      | 0      | 0      | 0      | 0      | 0      |
| Xanthomonadaceae  | 1              | 39             | 0      | 0      | 0      | 0      | 0      | 0      | 0      | 0      | 0      | 0      | 0      | 0      | 0      | 0      | 0      | 0      | 0      | 0      |
| Xanthomonas       | 2              | 162            | 0      | 0      | 0      | 0      | 0      | 0      | 0      | 0      | 0      | 0      | 1      | 0      | 0      | 1      | 0      | 0      | 0      | 0      |
| Xenorhabdus       | 2              | 127            | 0      | 0      | 0      | 0      | 0      | 0      | 0      | 0      | 0      | 0      | 0      | 0      | 0      | 0      | 0      | 0      | 0      | 0      |
| Xylanimonas       | 2              | 66             | 1      | 0      | 0      | 0      | 0      | 0      | 0      | 0      | 0      | 0      | 0      | 0      | 0      | 0      | 0      | 0      | 0      | 0      |
| Xylella           | 2              | 52             | 0      | 0      | 0      | 0      | 0      | 0      | 0      | 0      | 0      | 0      | 0      | 0      | 0      | 0      | 0      | 0      | 0      | 0      |
| Yersinia          | 2              | 145            | 0      | 0      | 0      | 0      | 0      | 0      | 0      | 0      | 0      | 0      | 0      | 0      | 0      | 0      | 0      | 0      | 0      | 0      |
| Yokenella         | 2              | 61             | 0      | 0      | 0      | 0      | 0      | 0      | 0      | 0      | 0      | 0      | 0      | 0      | 0      | 0      | 0      | 0      | 0      | 0      |
| Zobellia          | 1              | 28             | 0      | 0      | 0      | 0      | 0      | 0      | 0      | 0      | 0      | 0      | 0      | 0      | 0      | 0      | 0      | 0      | 0      | 0      |
| Zunongwangia      | 2              | 98             | 0      | 0      | 0      | 0      | 0      | 0      | 0      | 0      | 0      | 0      | 0      | 0      | 0      | 0      | 0      | 0      | 0      | 0      |
| Zymomonas         | 2              | 67             | 0      | 0      | 0      | 0      | 0      | 0      | 0      | 0      | 0      | 0      | 0      | 0      | 0      | 0      | 0      | 0      | 0      | 0      |
| Zymophilus        | 1              | 2              | 0      | 0      | 0      | 0      | 0      | 0      | 0      | 0      | 0      | 0      | 0      | 0      | 0      | 0      | 0      | 0      | 0      | 0      |

| Genus               | Cluster Number | Protein Counts | K04112 | K04116 | K04117 | K04118 | K05296 | K05394 | K05549 | K05599 | K05783 | K05898 | K05913 | K06281 | K06446 | K06912 | K07408 | K07535 | K07536 | K07537 |
|---------------------|----------------|----------------|--------|--------|--------|--------|--------|--------|--------|--------|--------|--------|--------|--------|--------|--------|--------|--------|--------|--------|
| Acaricomes          | 1              | 2              | 0      | 0      | 0      | 0      | 0      | 0      | 0      | 0      | 0      | 0      | 0      | 0      | 0      | 0      | 0      | 0      | 0      | 0      |
| Acaryochloris       | 2              | 88             | 0      | 0      | 0      | 0      | 0      | 0      | 0      | 0      | 0      | 0      | 0      | 0      | 0      | 0      | 0      | 0      | 0      | 0      |
| Acetivibrio         | 1              | 2              | 0      | 0      | 0      | 0      | 0      | 0      | 0      | 0      | 0      | 0      | 0      | 0      | 0      | 0      | 0      | 0      | 0      | 0      |
| Acetobacter         | 2              | 85             | 0      | 0      | 0      | 0      | 0      | 0      | 0      | 0      | 0      | 0      | 0      | 0      | 0      | 0      | 0      | 0      | 0      | 0      |
| Acetobacteraceae    | 1              | 2              | 0      | 0      | 0      | 0      | 0      | 0      | 0      | 0      | 0      | 0      | 0      | 0      | 0      | 0      | 0      | 0      | 0      | 0      |
| Acetobacterium      | 1              | 8              | 0      | 0      | 0      | 0      | 0      | 0      | 0      | 0      | 0      | 0      | 0      | 0      | 0      | 0      | 0      | 0      | 0      | 0      |
| Acetohalobium       | 2              | 79             | 0      | 0      | 0      | 0      | 0      | 0      | 0      | 0      | 0      | 0      | 0      | 1      | 0      | 0      | 0      | 0      | 0      | 0      |
| Acholeplasma        | 2              | 38             | 0      | 0      | 0      | 0      | 0      | 0      | 0      | 0      | 0      | 0      | 0      | 0      | 0      | 0      | 0      | 0      | 0      | 0      |
| Achromobacter       | 2              | 192            | 0      | 0      | 0      | 0      | 0      | 0      | 0      | 0      | 1      | 0      | 0      | 0      | 1      | 0      | 0      | 1      | 1      | 0      |
| Acidaminococcus     | 1              | 65             | 0      | 0      | 0      | 0      | 0      | 0      | 0      | 0      | 0      | 0      | 0      | 0      | 0      | 0      | 0      | 0      | 0      | 0      |
| Acidianus           | 1              | 9              | 0      | 0      | 0      | 0      | 0      | 0      | 0      | 0      | 0      | 0      | 0      | 0      | 0      | 0      | 0      | 0      | 0      | 0      |
| Acidilobus          | 1              | 8              | 0      | 0      | 0      | 0      | 0      | 0      | 0      | 0      | 0      | 0      | 0      | 0      | 0      | 0      | 0      | 0      | 0      | 0      |
| Acidimicrobium      | 2              | 58             | 0      | 0      | 0      | 0      | 0      | 0      | 0      | 0      | 0      | 0      | 0      | 0      | 0      | 0      | 0      | 0      | 0      | 0      |
| Acidiphilium        | 3              | 144            | 0      | 0      | 0      | 0      | 0      | 0      | 0      | 0      | 0      | 0      | 0      | 1      | 1      | 0      | 0      | 0      | 0      | 0      |
| Acidithiobacillus   | 2              | 70             | 0      | 0      | 0      | 0      | 0      | 0      | 0      | 0      | 0      | 0      | 0      | 1      | 0      | 0      | 0      | 0      | 0      | 0      |
| Acidobacterium      | 2              | 91             | 0      | 0      | 0      | 0      | 0      | 0      | 0      | 0      | 0      | 0      | 0      | 1      | 0      | 0      | 0      | 0      | 0      | 0      |
| Acidocella          | 1              | 2              | 0      | 0      | 0      | 0      | 0      | 0      | 0      | 0      | 0      | 0      | 0      | 0      | 0      | 0      | 0      | 0      | 0      | 0      |
| Acidothermus        | 2              | 68             | 0      | 0      | 0      | 0      | 0      | 0      | 0      | 0      | 0      | 0      | 0      | 0      | 0      | 0      | 0      | 0      | 0      | 0      |
| Acidovorax          | 3              | 217            | 0      | 0      | 1      | 0      | 0      | 0      | 0      | 0      | 0      | 0      | 0      | 0      | 1      | 0      | 0      | 0      | 1      | 0      |
| Aciduliprofundum    | 1              | 11             | 0      | 0      | 0      | 0      | 0      | 0      | 0      | 0      | 0      | 0      | 0      | 0      | 0      | 0      | 0      | 0      | 0      | 0      |
| Acinetobacter       | 3              | 188            | 0      | 0      | 0      | 0      | 0      | 0      | 1      | 1      | 1      | 0      | 0      | 0      | 1      | 0      | 0      | 0      | 0      | 0      |
| Actinobacillus      | 2              | 112            | 0      | 0      | 0      | 0      | 0      | 0      | 0      | 0      | 0      | 0      | 0      | 1      | 0      | 0      | 0      | 0      | 0      | 0      |
| Actinomadura        | 1              | 1              | 0      | 0      | 0      | 0      | 0      | 0      | 0      | 0      | 0      | 0      | 0      | 0      | 0      | 0      | 0      | 0      | 0      | 0      |
| Actinoplanes        | 1              | 52             | 0      | 0      | 0      | 0      | 0      | 0      | 0      | 0      | 0      | 1      | 0      | 0      | 0      | 0      | 0      | 0      | 0      | 0      |
| Actinopolyspora     | 1              | 2              | 0      | 0      | 0      | 0      | 0      | 0      | 0      | 0      | 0      | 0      | 0      | 0      | 0      | 0      | 0      | 0      | 0      | 0      |
| Actinosynnema       | 2              | 122            | 0      | 0      | 0      | 0      | 0      | 0      | 0      | 0      | 0      | 0      | 0      | 0      | 0      | 0      | 0      | 0      | 0      | 0      |
| Advenella           | 1              | 30             | 0      | 0      | 0      | 0      | 0      | 0      | 0      | 0      | 0      | 0      | 0      | 0      | 1      | 1      | 0      | 0      | 1      | 0      |
| Aequorivita         | 1              | 12             | 0      | 0      | 0      | 0      | 0      | 0      | 0      | 0      | 0      | 0      | 0      | 0      | 0      | 0      | 0      | 0      | 0      | 0      |
| Aerococcus          | 2              | 57             | 0      | 0      | 0      | 0      | 0      | 0      | 0      | 0      | 0      | 0      | 0      | 0      | 0      | 0      | 0      | 0      | 0      | 0      |
| Aeromonas           | 2              | 127            | 0      | 0      | 0      | 0      | 0      | 0      | 0      | 0      | 0      | 0      | 0      | 1      | 0      | 0      | 0      | 0      | 0      | 0      |
| Aeropyrum           | 1              | 13             | 0      | 0      | 0      | 0      | 0      | 0      | 0      | 0      | 0      | 0      | 0      | 0      | 0      | 0      | 0      | 0      | 0      | 0      |
| Afipia              | 1              | 54             | 0      | 0      | 0      | 0      | 0      | 0      | 1      | 0      | 0      | 0      | 0      | 0      | 0      | 0      | 0      | 0      | 0      | 0      |
| Aggregatibacter     | 1              | 81             | 0      | 0      | 0      | 0      | 0      | 0      | 0      | 0      | 0      | 0      | 0      | 1      | 0      | 0      | 0      | 0      | 0      | 0      |
| Agrobacterium       | 2              | 242            | 0      | 0      | 0      | 0      | 0      | 0      | 1      | 0      | 1      | 0      | 0      | 0      | 0      | 0      | 0      | 0      | 0      | 0      |
| Ahrensia            | 1              | 2              | 0      | 0      | 0      | 0      | 0      | 0      | 0      | 0      | 0      | 0      | 0      | 0      | 0      | 0      | 0      | 0      | 0      | 0      |
| Akkermansia         | 2              | 47             | 0      | 0      | 0      | 0      | 0      | 0      | 0      | 0      | 0      | 0      | 0      | 1      | 0      | 0      | 0      | 0      | 0      | 0      |
| Albidiferax         | 3              | 144            | 0      | 0      | 0      | 0      | 0      | 0      | 0      | 0      | 0      | 0      | 0      | 1      | 0      | 0      | 0      | 0      | 0      | 0      |
| Alcaligenes         | 1              | 21             | 0      | 0      | 0      | 0      | 0      | 0      | 0      | 0      | 0      | 0      | 0      | 0      | 0      | 0      | 0      | 0      | 0      | 0      |
| Alcanivorax         | 2              | 146            | 0      | 0      | 0      | 0      | 0      | 0      | 0      | 0      | 0      | 0      | 0      | 0      | 1      | 0      | 0      | 0      | 0      | 0      |
| Alicyclophilus      | 3              | 152            | 0      | 1      | 1      | 1      | 0      | 0      | 0      | 0      | 1      | 0      | 0      | 0      | 1      | 0      | 0      | 1      | 1      | 0      |
| Alicyclobacillus    | 2              | 91             | 0      | 1      | 1      | 0      | 0      | 0      | 0      | 0      | 0      | 0      | 0      | 0      | 1      | 0      | 0      | 1      | 0      | 0      |
| Aliivibrio          | 2              | 118            | 0      | 0      | 0      | 0      | 0      | 0      | 0      | 0      | 0      | 0      | 0      | 0      | 0      | 0      | 0      | 0      | 0      | 0      |
| Alishewanella       | 1              | 1              | 0      | 0      | 0      | 0      | 0      | 0      | 0      | 0      | 0      | 0      | 0      | 0      | 0      | 0      | 0      | 0      | 0      | 0      |
| Alistipes           | 1              | 52             | 0      | 0      | 0      | 0      | 0      | 0      | 0      | 0      | 0      | 0      | 0      | 0      | 0      | 0      | 0      | 0      | 0      | 0      |
| Alkalilimnicola     | 2              | 97             | 0      | 0      | 0      | 0      | 0      | 0      | 0      | 0      | 0      | 0      | 0      | 1      | 0      | 0      | 0      | 0      | 0      | 0      |
| Alkaliphilus        | 2              | 62             | 0      | 0      | 0      | 0      | 0      | 0      | 0      | 0      | 0      | 0      | 0      | 0      | 0      | 0      | 0      | 0      | 0      | 0      |
| Allochromatium      | 2              | 84             | 0      | 0      | 0      | 0      | 0      | 0      | 0      | 0      | 0      | 0      | 0      | 1      | 0      | 0      | 0      | 0      | 0      | 0      |
| Alphaproteobacteria | 1              | 3              | 0      | 0      | 0      | 0      | 0      | 0      | 0      | 0      | 0      | 0      | 0      | 0      | 0      | 0      | 0      | 0      | 0      | 0      |
| Alteromonadales     | 1              | 12             | 0      | 0      | 0      | 0      | 0      | 0      | 0      | 0      | 0      | 0      | 0      | 0      | 0      | 0      | 0      | 0      | 0      | 0      |
| Alteromonas         | 1              | 37             | 0      | 0      | 0      | 0      | 0      | 0      | 1      | 0      | 1      | 0      | 0      | 1      | 0      | 0      | 0      | 0      | 0      | 0      |
| Aminobacter         | 1              | 4              | 0      | 0      | 0      | 0      | 0      | 0      | 0      | 0      | 0      | 0      | 0      | 0      | 0      | 0      | 0      | 0      | 0      | 0      |
| Aminobacterium      | 2              | 59             | 0      | 0      | 0      | 0      | 0      | 0      | 0      | 0      | 0      | 0      | 0      | 0      | 0      | 0      | 0      | 0      | 0      | 0      |

| Genus            | Cluster Number | Protein Counts | K04112 | K04116 | K04117 | K04118 | K05296 | K05394 | K05549 | K05599 | K05783 | K05898 | K05913 | K06281 | K06446 | K06912 | K07408 | K07535 | K07536 | K07537 |
|------------------|----------------|----------------|--------|--------|--------|--------|--------|--------|--------|--------|--------|--------|--------|--------|--------|--------|--------|--------|--------|--------|
| Ammonifex        | 2              | 50             | 0      | 0      | 0      | 0      | 0      | 0      | 0      | 0      | 0      | 0      | 0      | 1      | 0      | 0      | 0      | 0      | 0      | 0      |
| Amphibacillus    | 1              | 13             | 0      | 0      | 0      | 0      | 0      | 0      | 0      | 0      | 0      | 0      | 0      | 0      | 0      | 0      | 0      | 0      | 0      | 0      |
| Amphritea        | 1              | 2              | 0      | 0      | 0      | 0      | 0      | 0      | 0      | 0      | 0      | 0      | 0      | 0      | 0      | 0      | 0      | 0      | 0      | 0      |
| Amycolatopsis    | 2              | 201            | 0      | 0      | 0      | 0      | 0      | 0      | 0      | 0      | 0      | 1      | 0      | 1      | 1      | 0      | 0      | 1      | 0      | 0      |
| Amycolicoccus    | 1              | 43             | 0      | 0      | 0      | 0      | 0      | 0      | 0      | 0      | 0      | 1      | 0      | 1      | 0      | 0      | 0      | 0      | 0      | 0      |
| Anabaena         | 2              | 92             | 0      | 0      | 0      | 0      | 0      | 0      | 0      | 0      | 0      | 0      | 0      | 1      | 0      | 0      | 0      | 0      | 0      | 0      |
| Anaerobaculum    | 1              | 11             | 0      | 0      | 0      | 0      | 0      | 0      | 0      | 0      | 0      | 0      | 0      | 0      | 0      | 0      | 0      | 0      | 0      | 0      |
| Anaerococcus     | 2              | 46             | 0      | 0      | 0      | 0      | 0      | 0      | 0      | 0      | 0      | 0      | 0      | 0      | 0      | 0      | 0      | 0      | 0      | 0      |
| Anaerolinea      | 2              | 66             | 0      | 0      | 0      | 0      | 0      | 0      | 0      | 0      | 0      | 0      | 0      | 0      | 0      | 0      | 0      | 0      | 0      | 0      |
| Anaeromyxobacter | 3              | 117            | 0      | 0      | 0      | 0      | 0      | 0      | 0      | 0      | 0      | 0      | 0      | 1      | 0      | 0      | 0      | 0      | 0      | 0      |
| Anaerostipes     | 1              | 44             | 0      | 0      | 0      | 0      | 0      | 0      | 0      | 0      | 0      | 0      | 0      | 0      | 0      | 0      | 0      | 0      | 0      | 0      |
| Anaerotruncus    | 1              | 2              | 0      | 0      | 0      | 0      | 0      | 0      | 0      | 0      | 0      | 0      | 0      | 0      | 0      | 0      | 0      | 0      | 0      | 0      |
| Anaplasma        | 1              | 35             | 0      | 0      | 0      | 0      | 0      | 0      | 0      | 0      | 0      | 0      | 0      | 0      | 0      | 0      | 0      | 0      | 0      | 0      |
| Ancylobacter     | 1              | 3              | 0      | 0      | 0      | 0      | 0      | 0      | 0      | 0      | 0      | 0      | 0      | 1      | 0      | 0      | 0      | 0      | 0      | 0      |
| Aneurinibacillus | 1              | 1              | 0      | 0      | 0      | 0      | 0      | 0      | 0      | 0      | 0      | 0      | 0      | 0      | 0      | 0      | 0      | 0      | 0      | 0      |
| Angomonas        | 1              | 1              | 0      | 0      | 0      | 0      | 0      | 0      | 0      | 0      | 0      | 0      | 0      | 0      | 0      | 0      | 0      | 0      | 0      | 0      |
| Anoxybacillus    | 2              | 72             | 0      | 0      | 0      | 0      | 0      | 0      | 0      | 0      | 0      | 0      | 0      | 0      | 0      | 0      | 0      | 0      | 0      | 0      |
| Aquifex          | 2              | 45             | 0      | 0      | 0      | 0      | 0      | 0      | 0      | 0      | 0      | 0      | 0      | 1      | 0      | 0      | 0      | 0      | 0      | 0      |
| Aquimarina       | 1              | 2              | 0      | 0      | 0      | 0      | 0      | 0      | 0      | 0      | 0      | 0      | 0      | 0      | 0      | 0      | 0      | 0      | 0      | 0      |
| Arcanobacterium  | 2              | 45             | 0      | 0      | 0      | 0      | 0      | 0      | 0      | 0      | 0      | 0      | 0      | 0      | 0      | 0      | 0      | 0      | 0      | 0      |
| Archaeoglobus    | 1              | 14             | 0      | 0      | 0      | 0      | 0      | 0      | 0      | 0      | 0      | 0      | 0      | 1      | 0      | 0      | 0      | 0      | 0      | 0      |
| Arcobacter       | 2              | 101            | 0      | 0      | 0      | 0      | 0      | 0      | 0      | 0      | 0      | 0      | 0      | 1      | 0      | 0      | 0      | 0      | 0      | 0      |
| Aromatoleum      | 3              | 133            | 1      | 1      | 1      | 1      | 0      | 1      | 0      | 0      | 0      | 0      | 0      | 0      | 1      | 0      | 0      | 1      | 1      | 1      |
| Arsenophonus     | 1              | 4              | 0      | 0      | 0      | 0      | 0      | 0      | 0      | 0      | 0      | 0      | 0      | 0      | 0      | 0      | 0      | 0      | 0      | 0      |
| Arthrobacter     | 2              | 206            | 0      | 0      | 0      | 0      | 0      | 0      | 1      | 0      | 1      | 0      | 0      | 0      | 0      | 0      | 0      | 0      | 0      | 0      |
| Arthrospira      | 2              | 67             | 0      | 0      | 0      | 0      | 0      | 0      | 0      | 0      | 0      | 0      | 0      | 0      | 0      | 0      | 0      | 0      | 0      | 0      |
| Aster            | 1              | 10             | 0      | 0      | 0      | 0      | 0      | 0      | 0      | 0      | 0      | 0      | 0      | 0      | 0      | 0      | 0      | 0      | 0      | 0      |
| Asticcacaulis    | 2              | 103            | 0      | 0      | 0      | 0      | 1      | 0      | 0      | 0      | 0      | 0      | 0      | 0      | 0      | 0      | 0      | 0      | 0      | 0      |
| Atopobium        | 1              | 28             | 0      | 0      | 0      | 0      | 0      | 0      | 0      | 0      | 0      | 0      | 0      | 0      | 0      | 0      | 0      | 0      | 0      | 0      |
| Aurantimonas     | 1              | 2              | 0      | 0      | 0      | 0      | 0      | 0      | 0      | 0      | 0      | 0      | 0      | 0      | 0      | 0      | 0      | 0      | 0      | 0      |
| Avibacterium     | 1              | 17             | 0      | 0      | 0      | 0      | 0      | 0      | 0      | 0      | 0      | 0      | 0      | 0      | 0      | 0      | 0      | 0      | 0      | 0      |
| Azoarcus         | 3              | 172            | 0      | 1      | 0      | 0      | 0      | 0      | 0      | 0      | 0      | 0      | 0      | 1      | 1      | 0      | 0      | 0      | 0      | 0      |
| Azorhizobium     | 3              | 149            | 0      | 0      | 0      | 0      | 0      | 0      | 0      | 0      | 0      | 0      | 0      | 1      | 0      | 0      | 0      | 0      | 0      | 0      |
| Azorhizophilus   | 1              | 4              | 0      | 0      | 0      | 0      | 0      | 0      | 0      | 0      | 0      | 0      | 0      | 0      | 0      | 0      | 0      | 0      | 0      | 0      |
| Azospira         | 1              | 19             | 0      | 0      | 0      | 0      | 0      | 0      | 0      | 0      | 0      | 0      | 0      | 1      | 0      | 0      | 0      | 0      | 0      | 0      |
| Azospirillum     | 2              | 198            | 0      | 0      | 0      | 0      | 0      | 0      | 1      | 0      | 1      | 0      | 0      | 1      | 1      | 0      | 0      | 0      | 0      | 0      |
| Azotobacter      | 3              | 183            | 0      | 0      | 0      | 0      | 0      | 0      | 1      | 0      | 1      | 0      | 0      | 1      | 0      | 0      | 0      | 0      | 0      | 0      |
| Bacillales       | 1              | 9              | 0      | 0      | 0      | 0      | 0      | 0      | 0      | 0      | 0      | 0      | 0      | 0      | 0      | 0      | 0      | 0      | 0      | 0      |
| Bacilli          | 1              | 3              | 0      | 0      | 0      | 0      | 0      | 0      | 0      | 0      | 0      | 0      | 0      | 0      | 0      | 0      | 0      | 0      | 0      | 0      |
| Bacillus         | 2              | 237            | 0      | 0      | 0      | 0      | 0      | 0      | 1      | 0      | 0      | 1      | 0      | 1      | 0      | 0      | 0      | 0      | 0      | 0      |
| Bacteria         | 2              | 86             | 0      | 0      | 0      | 0      | 0      | 0      | 0      | 0      | 0      | 0      | 0      | 1      | 1      | 0      | 0      | 0      | 0      | 0      |
| Bacteriovorax    | 2              | 98             | 0      | 0      | 0      | 0      | 0      | 0      | 0      | 0      | 0      | 0      | 0      | 0      | 0      | 0      | 0      | 0      | 0      | 0      |
| Bacteroidales    | 2              | 59             | 0      | 0      | 0      | 0      | 0      | 0      | 0      | 0      | 0      | 0      | 0      | 1      | 0      | 0      | 0      | 0      | 0      | 0      |
| Bacteroides      | 2              | 96             | 0      | 0      | 0      | 0      | 0      | 0      | 0      | 0      | 0      | 0      | 0      | 1      | 0      | 0      | 0      | 0      | 0      | 0      |
| Bacteroidetes    | 1              | 2              | 0      | 0      | 0      | 0      | 0      | 0      | 0      | 0      | 0      | 0      | 0      | 0      | 0      | 0      | 0      | 0      | 0      | 0      |
| Bartonella       | 2              | 50             | 0      | 0      | 0      | 0      | 0      | 0      | 0      | 0      | 0      | 0      | 0      | 0      | 0      | 0      | 0      | 0      | 0      | 0      |
| Baumannia        | 2              | 24             | 0      | 0      | 0      | 0      | 0      | 0      | 0      | 0      | 0      | 0      | 0      | 0      | 0      | 0      | 0      | 0      | 0      | 0      |
| Bdellovibrio     | 2              | 87             | 0      | 0      | 0      | 0      | 0      | 0      | 0      | 0      | 0      | 0      | 0      | 0      | 0      | 0      | 0      | 0      | 0      | 0      |
| Beijerinckia     | 3              | 123            | 0      | 0      | 0      | 0      | 0      | 0      | 0      | 0      | 0      | 0      | 0      | 1      | 0      | 0      | 0      | 0      | 0      | 0      |
| Belliella        | 1              | 14             | 0      | 0      | 0      | 0      | 0      | 0      | 0      | 0      | 0      | 0      | 0      | 0      | 0      | 0      | 0      | 0      | 0      | 0      |
| Beutenbergia     | 2              | 82             | 0      | 0      | 0      | 0      | 0      | 0      | 0      | 0      | 0      | 0      | 0      | 0      | 0      | 0      | 0      | 0      | 0      | 0      |
| Bifidobacterium  | 2              | 61             | 0      | 0      | 0      | 0      | 0      | 0      | 0      | 0      | 0      | 0      | 0      | 0      | 0      | 0      | 0      | 0      | 0      | 0      |



| Genus                | Cluster Number | Protein Counts | K04112 | K04116 | K04117 | K04118 | K05296 | K05394 | K05549 | K05599 | K05783 | K05898 | K05913 | K06281 | K06446 | K06912 | K07408 | K07535 | K07536 | K07537 |
|----------------------|----------------|----------------|--------|--------|--------|--------|--------|--------|--------|--------|--------|--------|--------|--------|--------|--------|--------|--------|--------|--------|
| Bizionia             | 1              | 1              | 0      | 0      | 0      | 0      | 0      | 0      | 0      | 0      | 0      | 0      | 0      | 0      | 0      | 0      | 0      | 0      | 0      | 0      |
| Blastococcus         | 1              | 39             | 0      | 0      | 0      | 0      | 0      | 0      | 0      | 0      | 0      | 0      | 0      | 0      | 1      | 1      | 0      | 0      | 0      | 0      |
| Blattabacterium      | 1              | 23             | 0      | 0      | 0      | 0      | 0      | 0      | 0      | 0      | 0      | 0      | 0      | 0      | 0      | 0      | 0      | 0      | 0      | 0      |
| Blautia              | 1              | 22             | 0      | 0      | 0      | 0      | 0      | 0      | 0      | 0      | 0      | 0      | 0      | 0      | 0      | 0      | 0      | 0      | 0      | 0      |
| Bordetella           | 3              | 227            | 0      | 0      | 0      | 0      | 0      | 0      | 1      | 0      | 1      | 1      | 0      | 0      | 1      | 1      | 0      | 1      | 0      | 0      |
| Borrelia             | 1              | 32             | 0      | 0      | 0      | 0      | 0      | 0      | 0      | 0      | 0      | 0      | 0      | 0      | 0      | 0      | 0      | 0      | 0      | 0      |
| Brachybacterium      | 1              | 18             | 0      | 0      | 1      | 0      | 0      | 0      | 0      | 0      | 0      | 0      | 0      | 0      | 0      | 0      | 0      | 1      | 0      | 0      |
| Brachymonas          | 1              | 4              | 0      | 0      | 0      | 0      | 0      | 0      | 0      | 0      | 0      | 0      | 0      | 0      | 0      | 0      | 0      | 0      | 0      | 0      |
| Brachyspira          | 2              | 79             | 0      | 0      | 0      | 0      | 0      | 0      | 0      | 0      | 0      | 0      | 0      | 0      | 0      | 0      | 0      | 0      | 0      | 0      |
| Bradyrhizobiaceae    | 1              | 20             | 0      | 0      | 0      | 0      | 0      | 0      | 1      | 0      | 0      | 0      | 0      | 0      | 0      | 0      | 0      | 0      | 0      | 0      |
| Bradyrhizobium       | 3              | 254            | 0      | 0      | 0      | 0      | 0      | 0      | 0      | 0      | 0      | 0      | 0      | 1      | 0      | 1      | 0      | 0      | 1      | 0      |
| Brenneria            | 1              | 20             | 0      | 0      | 0      | 0      | 0      | 0      | 0      | 0      | 0      | 0      | 0      | 0      | 0      | 0      | 0      | 0      | 0      | 0      |
| Brevibacillus        | 2              | 122            | 0      | 0      | 0      | 0      | 0      | 0      | 0      | 0      | 0      | 0      | 0      | 0      | 0      | 0      | 0      | 0      | 0      | 0      |
| Brevibacterium       | 1              | 4              | 0      | 0      | 0      | 0      | 0      | 0      | 0      | 0      | 0      | 0      | 0      | 0      | 0      | 0      | 0      | 0      | 0      | 0      |
| Brevundimonas        | 2              | 105            | 0      | 0      | 0      | 0      | 0      | 0      | 0      | 0      | 0      | 0      | 0      | 0      | 0      | 0      | 0      | 0      | 0      | 0      |
| Brucella             | 3              | 138            | 0      | 0      | 0      | 0      | 0      | 0      | 0      | 0      | 0      | 0      | 0      | 0      | 1      | 0      | 0      | 0      | 0      | 0      |
| Buchnera             | 1              | 26             | 0      | 0      | 0      | 0      | 0      | 0      | 0      | 0      | 0      | 0      | 0      | 0      | 0      | 0      | 0      | 0      | 0      | 0      |
| Burkholderia         | 3              | 424            | 0      | 0      | 0      | 0      | 1      | 1      | 1      | 1      | 1      | 1      | 1      | 1      | 1      | 1      | 0      | 1      | 1      | 0      |
| Burkholderiaceae     | 3              | 143            | 0      | 0      | 0      | 0      | 1      | 0      | 1      | 0      | 0      | 0      | 0      | 0      | 1      | 0      | 0      | 0      | 1      | 0      |
| Burkholderiales      | 1              | 24             | 0      | 0      | 0      | 0      | 0      | 0      | 0      | 0      | 0      | 0      | 0      | 0      | 0      | 0      | 0      | 0      | 0      | 0      |
| Buttiauxella         | 1              | 2              | 0      | 0      | 0      | 0      | 0      | 0      | 0      | 0      | 0      | 0      | 0      | 0      | 0      | 0      | 0      | 0      | 0      | 0      |
| Butyrivibrio         | 2              | 67             | 0      | 0      | 0      | 0      | 0      | 0      | 0      | 0      | 0      | 0      | 0      | 0      | 0      | 0      | 0      | 0      | 0      | 0      |
| Caldanaerobacter     | 2              | 63             | 0      | 0      | 0      | 0      | 0      | 0      | 0      | 0      | 0      | 0      | 0      | 0      | 0      | 0      | 0      | 0      | 0      | 0      |
| Caldicellulosiruptor | 2              | 75             | 0      | 0      | 0      | 0      | 0      | 0      | 0      | 0      | 0      | 0      | 0      | 0      | 0      | 0      | 0      | 0      | 0      | 0      |
| Caldilinea           | 1              | 23             | 0      | 0      | 0      | 0      | 0      | 0      | 0      | 0      | 0      | 0      | 0      | 0      | 0      | 0      | 0      | 0      | 0      | 0      |
| Caldimonas           | 1              | 6              | 0      | 0      | 0      | 0      | 0      | 0      | 0      | 0      | 0      | 0      | 0      | 0      | 0      | 0      | 0      | 0      | 0      | 0      |
| Caldisericum         | 1              | 10             | 0      | 0      | 0      | 0      | 0      | 0      | 0      | 0      | 0      | 0      | 0      | 0      | 0      | 0      | 0      | 0      | 0      | 0      |
| Caldisphaera         | 1              | 7              | 0      | 0      | 0      | 0      | 0      | 0      | 0      | 0      | 0      | 0      | 0      | 0      | 0      | 0      | 0      | 0      | 0      | 0      |
| Calditerrivibrio     | 2              | 74             | 0      | 0      | 0      | 0      | 0      | 0      | 0      | 0      | 0      | 0      | 0      | 1      | 0      | 0      | 0      | 0      | 0      | 0      |
| Caldivirga           | 1              | 13             | 0      | 0      | 0      | 0      | 0      | 0      | 0      | 0      | 0      | 0      | 0      | 0      | 0      | 0      | 0      | 0      | 0      | 0      |
| Calothrix            | 1              | 43             | 0      | 0      | 0      | 0      | 0      | 0      | 0      | 0      | 0      | 0      | 0      | 1      | 0      | 0      | 0      | 0      | 0      | 0      |
| Calyptogena          | 2              | 34             | 0      | 0      | 0      | 0      | 0      | 0      | 0      | 0      | 0      | 0      | 0      | 0      | 0      | 0      | 0      | 0      | 0      | 0      |
| Campylobacter        | 2              | 80             | 0      | 0      | 0      | 0      | 0      | 0      | 0      | 0      | 0      | 0      | 0      | 0      | 0      | 0      | 0      | 0      | 0      | 0      |
| Candidatus           | 2              | 290            | 0      | 0      | 0      | 0      | 0      | 0      | 0      | 0      | 0      | 0      | 0      | 1      | 1      | 0      | 0      | 0      | 0      | 1      |
| Capnocytophaga       | 1              | 50             | 0      | 0      | 0      | 0      | 0      | 0      | 0      | 0      | 0      | 0      | 0      | 0      | 0      | 0      | 0      | 0      | 0      | 0      |
| Carbophilus          | 1              | 2              | 0      | 0      | 0      | 0      | 0      | 0      | 0      | 0      | 0      | 0      | 0      | 0      | 0      | 0      | 0      | 0      | 0      | 0      |
| Carboxydibrachium    | 1              | 14             | 0      | 0      | 0      | 0      | 0      | 0      | 0      | 0      | 0      | 0      | 0      | 0      | 0      | 0      | 0      | 0      | 0      | 0      |
| Carboxydotherrmus    | 2              | 68             | 0      | 0      | 0      | 0      | 0      | 0      | 0      | 0      | 0      | 0      | 0      | 0      | 1      | 0      | 0      | 0      | 0      | 0      |
| Carica               | 1              | 2              | 0      | 0      | 0      | 0      | 0      | 0      | 0      | 0      | 0      | 0      | 0      | 0      | 0      | 0      | 0      | 0      | 0      | 0      |
| Carnobacterium       | 2              | 71             | 0      | 0      | 0      | 0      | 0      | 0      | 0      | 0      | 0      | 0      | 0      | 0      | 0      | 0      | 0      | 0      | 0      | 0      |
| Catenibacterium      | 1              | 2              | 0      | 0      | 0      | 0      | 0      | 0      | 0      | 0      | 0      | 0      | 0      | 0      | 0      | 0      | 0      | 0      | 0      | 0      |
| Catenovulum          | 1              | 2              | 0      | 0      | 0      | 0      | 0      | 0      | 0      | 0      | 0      | 0      | 0      | 0      | 0      | 0      | 0      | 0      | 0      | 0      |
| Catenulispora        | 3              | 159            | 0      | 0      | 0      | 0      | 0      | 0      | 0      | 0      | 0      | 1      | 0      | 0      | 0      | 0      | 0      | 0      | 0      | 0      |
| Caulobacter          | 3              | 168            | 0      | 0      | 0      | 0      | 0      | 0      | 0      | 0      | 0      | 0      | 0      | 0      | 1      | 0      | 0      | 0      | 0      | 0      |
| Cedecea              | 1              | 45             | 0      | 0      | 0      | 0      | 0      | 0      | 0      | 0      | 0      | 0      | 0      | 0      | 0      | 0      | 0      | 0      | 0      | 0      |
| Cellulomonas         | 2              | 96             | 0      | 0      | 0      | 0      | 0      | 0      | 0      | 0      | 0      | 0      | 0      | 0      | 0      | 0      | 0      | 0      | 0      | 0      |
| Cellulophaga         | 2              | 105            | 0      | 0      | 0      | 0      | 0      | 0      | 0      | 0      | 0      | 0      | 0      | 0      | 0      | 0      | 0      | 0      | 0      | 0      |
| Cellulosilyticum     | 1              | 14             | 0      | 0      | 0      | 0      | 0      | 0      | 0      | 0      | 0      | 0      | 0      | 0      | 0      | 0      | 0      | 0      | 0      | 0      |
| Cellvibrio           | 2              | 85             | 0      | 0      | 0      | 0      | 0      | 0      | 0      | 0      | 0      | 0      | 0      | 0      | 0      | 0      | 0      | 0      | 0      | 0      |
| Cenarchaeum          | 1              | 7              | 0      | 0      | 0      | 0      | 0      | 0      | 0      | 0      | 0      | 0      | 0      | 0      | 0      | 0      | 0      | 0      | 0      | 0      |
| Chamaesiphon         | 1              | 13             | 0      | 0      | 0      | 0      | 0      | 0      | 0      | 0      | 0      | 0      | 0      | 0      | 0      | 0      | 0      | 0      | 0      | 0      |
| Chelativorans        | 3              | 136            | 0      | 0      | 0      | 0      | 0      | 0      | 0      | 0      | 0      | 0      | 0      | 0      | 0      | 0      | 0      | 0      | 0      | 0      |

| Genus                  | Cluster Number | Protein Counts | K04112 | K04116 | K04117 | K04118 | K05296 | K05394 | K05549 | K05599 | K05783 | K05898 | K05913 | K06281 | K06446 | K06912 | K07408 | K07535 | K07536 | K07537 |
|------------------------|----------------|----------------|--------|--------|--------|--------|--------|--------|--------|--------|--------|--------|--------|--------|--------|--------|--------|--------|--------|--------|
| Chelatococcus          | 1              | 2              | 0      | 0      | 0      | 0      | 0      | 0      | 0      | 0      | 0      | 0      | 0      | 0      | 0      | 0      | 0      | 0      | 0      | 0      |
| Chitinophaga           | 2              | 98             | 0      | 0      | 0      | 0      | 0      | 0      | 0      | 0      | 0      | 0      | 0      | 0      | 0      | 0      | 0      | 0      | 0      | 0      |
| Chlamydia              | 1              | 36             | 0      | 0      | 0      | 0      | 0      | 0      | 0      | 0      | 0      | 0      | 0      | 0      | 0      | 0      | 0      | 0      | 0      | 0      |
| Chlamydomonas          | 1              | 3              | 0      | 0      | 0      | 0      | 0      | 0      | 0      | 0      | 0      | 0      | 0      | 0      | 0      | 0      | 0      | 0      | 0      | 0      |
| Chlamydomphila         | 1              | 31             | 0      | 0      | 0      | 0      | 0      | 0      | 0      | 0      | 0      | 0      | 0      | 0      | 0      | 0      | 0      | 0      | 0      | 0      |
| Chlorobaculum          | 2              | 61             | 0      | 0      | 0      | 0      | 0      | 0      | 0      | 0      | 0      | 0      | 0      | 1      | 0      | 0      | 0      | 0      | 0      | 0      |
| Chlorobium             | 2              | 89             | 0      | 0      | 0      | 0      | 0      | 0      | 0      | 0      | 0      | 0      | 0      | 1      | 0      | 0      | 0      | 0      | 0      | 0      |
| Chlorobium/Pelodictyon | 1              | 2              | 0      | 0      | 0      | 0      | 0      | 0      | 0      | 0      | 0      | 0      | 0      | 0      | 0      | 0      | 0      | 0      | 0      | 0      |
| Chloroflexus           | 2              | 105            | 0      | 0      | 0      | 0      | 0      | 0      | 0      | 0      | 0      | 1      | 0      | 1      | 0      | 0      | 0      | 0      | 0      | 0      |
| Chlorogloeopsis        | 1              | 9              | 0      | 0      | 0      | 0      | 0      | 0      | 0      | 0      | 0      | 0      | 0      | 0      | 0      | 0      | 0      | 0      | 0      | 0      |
| Chloroherpeton         | 2              | 59             | 0      | 0      | 0      | 0      | 0      | 0      | 0      | 0      | 0      | 0      | 0      | 1      | 0      | 0      | 0      | 0      | 0      | 0      |
| Chromobacterium        | 2              | 117            | 0      | 0      | 0      | 0      | 0      | 1      | 0      | 0      | 0      | 0      | 0      | 0      | 0      | 0      | 0      | 0      | 0      | 0      |
| Chromohalobacter       | 2              | 145            | 0      | 0      | 0      | 0      | 0      | 0      | 0      | 0      | 0      | 0      | 0      | 0      | 0      | 0      | 0      | 0      | 0      | 0      |
| Chroococciopsis        | 1              | 24             | 0      | 0      | 0      | 0      | 0      | 0      | 0      | 0      | 0      | 0      | 0      | 0      | 0      | 0      | 0      | 0      | 0      | 0      |
| Chryseobacterium       | 2              | 104            | 0      | 0      | 0      | 0      | 0      | 0      | 0      | 0      | 0      | 0      | 0      | 0      | 1      | 0      | 0      | 0      | 0      | 0      |
| Citricella             | 1              | 13             | 0      | 0      | 0      | 0      | 0      | 0      | 0      | 0      | 0      | 0      | 0      | 0      | 0      | 0      | 0      | 0      | 0      | 0      |
| Citrobacter            | 2              | 190            | 0      | 0      | 0      | 0      | 0      | 0      | 0      | 0      | 0      | 0      | 0      | 1      | 0      | 0      | 0      | 0      | 0      | 0      |
| Clavibacter            | 2              | 83             | 0      | 0      | 0      | 0      | 0      | 0      | 0      | 0      | 0      | 0      | 0      | 0      | 0      | 0      | 0      | 0      | 0      | 0      |
| Clonorchis             | 1              | 1              | 0      | 0      | 0      | 0      | 0      | 0      | 0      | 0      | 0      | 0      | 0      | 0      | 0      | 0      | 0      | 0      | 0      | 0      |
| Clostridiales          | 2              | 77             | 0      | 0      | 0      | 0      | 0      | 0      | 0      | 0      | 0      | 0      | 0      | 0      | 0      | 0      | 0      | 0      | 0      | 0      |
| Clostridium            | 2              | 191            | 0      | 0      | 0      | 0      | 0      | 0      | 0      | 0      | 0      | 0      | 0      | 1      | 0      | 0      | 0      | 0      | 0      | 0      |
| Cohnella               | 1              | 2              | 0      | 0      | 0      | 0      | 0      | 0      | 0      | 0      | 0      | 0      | 0      | 0      | 0      | 0      | 0      | 0      | 0      | 0      |
| Coleofasciculus        | 1              | 4              | 0      | 0      | 0      | 0      | 0      | 0      | 0      | 0      | 0      | 0      | 0      | 0      | 0      | 0      | 0      | 0      | 0      | 0      |
| Collimonas             | 1              | 35             | 0      | 0      | 0      | 0      | 0      | 0      | 0      | 0      | 0      | 0      | 0      | 0      | 0      | 0      | 0      | 0      | 0      | 0      |
| Colwellia              | 2              | 130            | 0      | 0      | 0      | 0      | 0      | 0      | 0      | 0      | 0      | 0      | 0      | 0      | 0      | 0      | 0      | 0      | 0      | 0      |
| Comamonas              | 2              | 196            | 0      | 0      | 0      | 0      | 1      | 0      | 0      | 0      | 0      | 1      | 0      | 0      | 1      | 0      | 0      | 0      | 0      | 0      |
| Conexibacter           | 3              | 117            | 0      | 1      | 0      | 0      | 0      | 0      | 0      | 0      | 0      | 0      | 0      | 1      | 0      | 0      | 0      | 0      | 0      | 0      |
| Coprobacillus          | 1              | 2              | 0      | 0      | 0      | 0      | 0      | 0      | 0      | 0      | 0      | 0      | 0      | 0      | 0      | 0      | 0      | 0      | 0      | 0      |
| Coprococcus            | 2              | 76             | 0      | 0      | 0      | 0      | 0      | 0      | 0      | 0      | 0      | 0      | 0      | 0      | 0      | 0      | 0      | 0      | 0      | 0      |
| Coprothermobacter      | 2              | 45             | 0      | 0      | 0      | 0      | 0      | 0      | 0      | 0      | 0      | 0      | 0      | 0      | 0      | 0      | 0      | 0      | 0      | 0      |
| Coralimargarita        | 2              | 68             | 0      | 0      | 0      | 0      | 0      | 0      | 0      | 0      | 0      | 0      | 0      | 0      | 0      | 0      | 0      | 0      | 0      | 0      |
| Corallococcus          | 1              | 29             | 0      | 1      | 0      | 0      | 0      | 0      | 0      | 0      | 0      | 0      | 0      | 0      | 0      | 0      | 0      | 0      | 0      | 0      |
| Coriobacterium         | 2              | 36             | 0      | 0      | 0      | 0      | 0      | 0      | 0      | 0      | 0      | 0      | 0      | 0      | 0      | 0      | 0      | 0      | 0      | 0      |
| Corynebacterineae      | 1              | 5              | 0      | 0      | 0      | 0      | 0      | 0      | 0      | 0      | 0      | 0      | 0      | 0      | 0      | 0      | 0      | 0      | 0      | 0      |
| Corynebacterium        | 2              | 175            | 0      | 0      | 1      | 0      | 0      | 0      | 1      | 0      | 1      | 1      | 0      | 1      | 0      | 0      | 0      | 1      | 0      | 0      |
| Coxiella               | 2              | 54             | 0      | 0      | 0      | 0      | 0      | 0      | 0      | 0      | 0      | 0      | 0      | 0      | 0      | 0      | 0      | 0      | 0      | 0      |
| Crinalium              | 1              | 21             | 0      | 0      | 0      | 0      | 0      | 0      | 0      | 0      | 0      | 0      | 0      | 0      | 0      | 0      | 0      | 0      | 0      | 0      |
| Croceibacter           | 2              | 80             | 0      | 0      | 0      | 0      | 0      | 0      | 0      | 0      | 0      | 0      | 0      | 0      | 0      | 0      | 0      | 0      | 0      | 0      |
| Crocospaera            | 1              | 6              | 0      | 0      | 0      | 0      | 0      | 0      | 0      | 0      | 0      | 0      | 0      | 1      | 0      | 0      | 0      | 0      | 0      | 0      |
| Cronobacter            | 2              | 120            | 0      | 0      | 0      | 0      | 0      | 0      | 0      | 0      | 0      | 0      | 0      | 0      | 0      | 0      | 0      | 0      | 0      | 0      |
| Cryptobacterium        | 2              | 39             | 0      | 0      | 0      | 0      | 0      | 0      | 0      | 0      | 0      | 0      | 0      | 1      | 1      | 0      | 0      | 0      | 0      | 0      |
| Cucumis                | 1              | 9              | 0      | 0      | 0      | 0      | 0      | 0      | 0      | 0      | 0      | 0      | 0      | 0      | 0      | 0      | 0      | 0      | 0      | 0      |
| Cupriavidus            | 3              | 317            | 0      | 1      | 1      | 1      | 1      | 0      | 1      | 0      | 1      | 1      | 0      | 1      | 1      | 1      | 0      | 1      | 1      | 0      |
| Curtobacterium         | 1              | 5              | 0      | 0      | 0      | 0      | 0      | 0      | 0      | 0      | 0      | 0      | 0      | 0      | 0      | 0      | 0      | 0      | 0      | 0      |
| Curvibacter            | 1              | 27             | 0      | 0      | 0      | 0      | 0      | 0      | 0      | 0      | 0      | 0      | 0      | 1      | 0      | 0      | 0      | 0      | 1      | 0      |
| Cyanobacterium         | 1              | 9              | 0      | 0      | 0      | 0      | 0      | 0      | 0      | 0      | 0      | 0      | 0      | 0      | 0      | 0      | 0      | 0      | 0      | 0      |
| Cyanobium              | 1              | 10             | 0      | 0      | 0      | 0      | 0      | 0      | 0      | 0      | 0      | 0      | 0      | 0      | 0      | 0      | 0      | 0      | 0      | 0      |
| Cyanothece             | 1              | 34             | 0      | 0      | 0      | 0      | 0      | 0      | 0      | 0      | 0      | 0      | 0      | 1      | 0      | 0      | 0      | 0      | 0      | 0      |
| Cyclobacterium         | 1              | 19             | 0      | 0      | 0      | 0      | 0      | 0      | 0      | 0      | 0      | 0      | 0      | 0      | 0      | 0      | 0      | 0      | 0      | 0      |
| Cycloclasticus         | 1              | 21             | 0      | 0      | 0      | 0      | 0      | 0      | 1      | 0      | 1      | 0      | 0      | 0      | 0      | 0      | 0      | 0      | 0      | 0      |
| Cylindrospermopsis     | 1              | 4              | 0      | 0      | 0      | 0      | 0      | 0      | 0      | 0      | 0      | 0      | 0      | 0      | 0      | 0      | 0      | 0      | 0      | 0      |
| Cylindrospermum        | 1              | 30             | 0      | 0      | 0      | 0      | 0      | 0      | 0      | 0      | 0      | 0      | 0      | 0      | 0      | 0      | 0      | 0      | 0      | 0      |

| Genus              | Cluster Number | Protein Counts | K04112 | K04116 | K04117 | K04118 | K05296 | K05394 | K05549 | K05599 | K05783 | K05898 | K05913 | K06281 | K06446 | K06912 | K07408 | K07535 | K07536 | K07537 |
|--------------------|----------------|----------------|--------|--------|--------|--------|--------|--------|--------|--------|--------|--------|--------|--------|--------|--------|--------|--------|--------|--------|
| Cytophaga          | 2              | 69             | 0      | 0      | 0      | 0      | 0      | 0      | 0      | 0      | 0      | 0      | 0      | 0      | 0      | 0      | 0      | 0      | 0      | 0      |
| Dactylococcopsis   | 1              | 8              | 0      | 0      | 0      | 0      | 0      | 0      | 0      | 0      | 0      | 0      | 0      | 0      | 0      | 0      | 0      | 0      | 0      | 0      |
| Dechloromonas      | 1              | 40             | 0      | 0      | 0      | 0      | 0      | 1      | 1      | 0      | 1      | 0      | 0      | 1      | 0      | 0      | 0      | 0      | 0      | 0      |
| Dechlorosoma       | 1              | 19             | 0      | 0      | 0      | 0      | 0      | 0      | 0      | 0      | 0      | 0      | 0      | 1      | 0      | 0      | 0      | 0      | 0      | 0      |
| Deferribacter      | 2              | 73             | 0      | 0      | 0      | 0      | 0      | 0      | 0      | 0      | 0      | 0      | 0      | 1      | 0      | 0      | 0      | 0      | 0      | 0      |
| Dehalobacter       | 1              | 9              | 0      | 0      | 0      | 0      | 0      | 0      | 0      | 0      | 0      | 0      | 0      | 1      | 0      | 0      | 0      | 0      | 0      | 0      |
| Dehalococcoides    | 2              | 41             | 0      | 0      | 0      | 0      | 0      | 0      | 0      | 0      | 0      | 0      | 0      | 1      | 0      | 0      | 0      | 0      | 0      | 0      |
| Dehalogenimonas    | 1              | 37             | 0      | 0      | 0      | 0      | 0      | 0      | 0      | 0      | 0      | 0      | 0      | 1      | 0      | 0      | 0      | 0      | 0      | 0      |
| Deinococcus        | 2              | 140            | 0      | 0      | 0      | 0      | 0      | 0      | 0      | 0      | 0      | 0      | 0      | 0      | 1      | 0      | 0      | 0      | 0      | 0      |
| Delftia            | 3              | 177            | 0      | 0      | 0      | 0      | 0      | 0      | 0      | 0      | 0      | 0      | 0      | 0      | 1      | 0      | 0      | 0      | 0      | 0      |
| Denitrovibrio      | 2              | 67             | 0      | 0      | 0      | 0      | 0      | 0      | 0      | 0      | 0      | 0      | 0      | 1      | 0      | 0      | 0      | 0      | 0      | 0      |
| Desulfarculus      | 2              | 92             | 0      | 0      | 0      | 0      | 0      | 0      | 0      | 0      | 0      | 0      | 0      | 1      | 1      | 0      | 0      | 0      | 0      | 0      |
| Desulfatibacillum  | 3              | 84             | 0      | 0      | 0      | 0      | 0      | 0      | 0      | 0      | 0      | 0      | 0      | 1      | 0      | 0      | 0      | 0      | 0      | 0      |
| Desulfitobacterium | 2              | 102            | 0      | 0      | 0      | 0      | 0      | 0      | 0      | 0      | 0      | 0      | 0      | 1      | 0      | 0      | 0      | 0      | 0      | 0      |
| Desulfobacca       | 2              | 65             | 0      | 0      | 0      | 0      | 0      | 0      | 0      | 0      | 0      | 0      | 0      | 0      | 0      | 0      | 0      | 0      | 0      | 0      |
| Desulfobacterium   | 2              | 113            | 0      | 0      | 0      | 0      | 0      | 0      | 0      | 0      | 0      | 0      | 0      | 1      | 0      | 0      | 0      | 0      | 0      | 0      |
| Desulfobacula      | 1              | 21             | 0      | 0      | 0      | 0      | 0      | 0      | 0      | 0      | 0      | 0      | 0      | 0      | 0      | 0      | 0      | 0      | 0      | 1      |
| Desulfobulbus      | 2              | 88             | 0      | 0      | 0      | 0      | 0      | 0      | 0      | 0      | 0      | 0      | 0      | 1      | 0      | 0      | 0      | 0      | 0      | 0      |
| Desulfocapsa       | 1              | 9              | 0      | 0      | 0      | 0      | 0      | 0      | 0      | 0      | 0      | 0      | 0      | 1      | 0      | 0      | 0      | 0      | 0      | 0      |
| Desulfococcus      | 2              | 80             | 0      | 0      | 0      | 0      | 0      | 0      | 0      | 0      | 0      | 0      | 0      | 0      | 0      | 0      | 0      | 0      | 0      | 0      |
| Desulfohalobium    | 2              | 52             | 0      | 0      | 0      | 0      | 0      | 0      | 0      | 0      | 0      | 0      | 0      | 1      | 0      | 0      | 0      | 0      | 0      | 0      |
| Desulfomicrobium   | 2              | 65             | 0      | 0      | 0      | 0      | 0      | 0      | 0      | 0      | 0      | 0      | 0      | 1      | 0      | 0      | 0      | 0      | 0      | 0      |
| Desulfomonile      | 1              | 25             | 0      | 0      | 0      | 0      | 0      | 0      | 0      | 0      | 0      | 0      | 0      | 1      | 0      | 0      | 0      | 0      | 0      | 1      |
| Desulforhabdus     | 1              | 2              | 0      | 0      | 0      | 0      | 0      | 0      | 0      | 0      | 0      | 0      | 0      | 0      | 0      | 0      | 0      | 0      | 0      | 0      |
| Desulfosporosinus  | 1              | 30             | 0      | 0      | 0      | 0      | 0      | 0      | 0      | 0      | 0      | 0      | 0      | 1      | 1      | 0      | 0      | 0      | 0      | 0      |
| Desulfotalea       | 2              | 66             | 0      | 0      | 0      | 0      | 0      | 0      | 0      | 0      | 0      | 0      | 0      | 1      | 0      | 0      | 0      | 0      | 0      | 0      |
| Desulfotomaculum   | 2              | 98             | 0      | 0      | 0      | 0      | 0      | 0      | 0      | 0      | 0      | 0      | 0      | 1      | 1      | 0      | 0      | 0      | 0      | 0      |
| Desulfovibrio      | 2              | 144            | 0      | 0      | 0      | 0      | 0      | 0      | 0      | 0      | 0      | 0      | 0      | 1      | 0      | 0      | 0      | 0      | 0      | 0      |
| Desulfurispirillum | 2              | 78             | 0      | 0      | 0      | 0      | 0      | 0      | 0      | 0      | 0      | 0      | 0      | 1      | 0      | 0      | 0      | 0      | 0      | 0      |
| Desulfurivibrio    | 2              | 71             | 0      | 0      | 0      | 0      | 0      | 0      | 0      | 0      | 0      | 0      | 0      | 1      | 0      | 0      | 0      | 0      | 0      | 0      |
| Desulfurobacterium | 2              | 53             | 0      | 0      | 0      | 0      | 0      | 0      | 0      | 0      | 0      | 0      | 0      | 1      | 0      | 0      | 0      | 0      | 0      | 0      |
| Desulfurococcus    | 1              | 11             | 0      | 0      | 0      | 0      | 0      | 0      | 0      | 0      | 0      | 0      | 0      | 0      | 0      | 0      | 0      | 0      | 0      | 0      |
| Diaphorobacter     | 1              | 16             | 0      | 0      | 0      | 0      | 0      | 0      | 0      | 0      | 0      | 0      | 0      | 0      | 0      | 0      | 0      | 0      | 0      | 0      |
| Dichelobacter      | 2              | 45             | 0      | 0      | 0      | 0      | 0      | 0      | 0      | 0      | 0      | 0      | 0      | 0      | 0      | 0      | 0      | 0      | 0      | 0      |
| Dickeya            | 2              | 155            | 0      | 0      | 0      | 0      | 0      | 0      | 0      | 0      | 0      | 0      | 0      | 1      | 0      | 0      | 0      | 0      | 0      | 0      |
| Dictyoglomus       | 2              | 62             | 0      | 0      | 0      | 0      | 0      | 0      | 0      | 0      | 0      | 0      | 0      | 0      | 0      | 0      | 0      | 0      | 0      | 0      |
| Dinoroseobacter    | 3              | 148            | 0      | 0      | 0      | 0      | 0      | 0      | 0      | 0      | 0      | 0      | 0      | 0      | 0      | 0      | 0      | 0      | 0      | 0      |
| Dokdonia           | 1              | 3              | 0      | 0      | 0      | 0      | 0      | 0      | 0      | 0      | 0      | 0      | 0      | 0      | 0      | 0      | 0      | 0      | 0      | 0      |
| Dorea              | 1              | 7              | 0      | 0      | 0      | 0      | 0      | 0      | 0      | 0      | 0      | 0      | 0      | 0      | 0      | 0      | 0      | 0      | 0      | 0      |
| Dyadobacter        | 2              | 83             | 0      | 0      | 0      | 0      | 0      | 0      | 0      | 0      | 0      | 0      | 0      | 0      | 0      | 0      | 0      | 0      | 0      | 0      |
| Echinicola         | 1              | 20             | 0      | 0      | 0      | 0      | 0      | 0      | 0      | 0      | 0      | 0      | 0      | 0      | 0      | 0      | 0      | 0      | 0      | 0      |
| Edwardsiella       | 2              | 126            | 0      | 0      | 0      | 0      | 0      | 0      | 0      | 0      | 0      | 0      | 0      | 1      | 0      | 0      | 0      | 0      | 0      | 0      |
| Eggerthella        | 1              | 51             | 0      | 0      | 0      | 0      | 0      | 0      | 0      | 0      | 0      | 0      | 0      | 1      | 1      | 0      | 0      | 0      | 0      | 0      |
| Ehrlichia          | 2              | 37             | 0      | 0      | 0      | 0      | 0      | 0      | 0      | 0      | 0      | 0      | 0      | 0      | 0      | 0      | 0      | 0      | 0      | 0      |
| Eikenella          | 1              | 4              | 0      | 0      | 0      | 0      | 0      | 0      | 0      | 0      | 0      | 0      | 0      | 0      | 0      | 0      | 0      | 0      | 0      | 0      |
| Elusimicrobium     | 2              | 44             | 0      | 0      | 0      | 0      | 0      | 0      | 0      | 0      | 0      | 0      | 0      | 0      | 0      | 0      | 0      | 0      | 0      | 0      |
| Emticicia          | 1              | 21             | 0      | 0      | 0      | 0      | 0      | 0      | 0      | 0      | 0      | 0      | 0      | 1      | 0      | 0      | 0      | 0      | 0      | 0      |
| Enhydrobacter      | 1              | 1              | 0      | 0      | 0      | 0      | 0      | 0      | 0      | 0      | 0      | 0      | 0      | 0      | 0      | 0      | 0      | 0      | 0      | 0      |
| Ensifer            | 1              | 2              | 0      | 0      | 0      | 0      | 0      | 0      | 0      | 0      | 0      | 0      | 0      | 0      | 0      | 0      | 0      | 0      | 0      | 0      |
| Enterobacter       | 2              | 202            | 0      | 0      | 0      | 0      | 0      | 0      | 1      | 0      | 1      | 0      | 0      | 1      | 0      | 0      | 0      | 0      | 0      | 0      |
| Enterobacteriaceae | 2              | 211            | 0      | 0      | 0      | 0      | 0      | 0      | 1      | 0      | 1      | 0      | 0      | 1      | 0      | 0      | 0      | 0      | 0      | 0      |
| Enterococcus       | 1              | 187            | 0      | 0      | 0      | 0      | 0      | 0      | 0      | 0      | 1      | 0      | 0      | 0      | 0      | 0      | 0      | 0      | 0      | 0      |

| Genus               | Cluster Number | Protein Counts | K04112 | K04116 | K04117 | K04118 | K05296 | K05394 | K05549 | K05599 | K05783 | K05898 | K05913 | K06281 | K06446 | K06912 | K07408 | K07535 | K07536 | K07537 |
|---------------------|----------------|----------------|--------|--------|--------|--------|--------|--------|--------|--------|--------|--------|--------|--------|--------|--------|--------|--------|--------|--------|
| Enterovibrio        | 1              | 15             | 0      | 0      | 0      | 0      | 0      | 0      | 0      | 0      | 0      | 0      | 0      | 0      | 0      | 0      | 0      | 0      | 0      | 0      |
| Erwinia             | 2              | 151            | 0      | 0      | 0      | 0      | 0      | 0      | 0      | 0      | 0      | 0      | 0      | 0      | 0      | 0      | 0      | 0      | 0      | 0      |
| Erysipelothrix      | 1              | 9              | 0      | 0      | 0      | 0      | 0      | 0      | 0      | 0      | 0      | 0      | 0      | 0      | 0      | 0      | 0      | 0      | 0      | 0      |
| Erysipelotrichaceae | 1              | 4              | 0      | 0      | 0      | 0      | 0      | 0      | 0      | 0      | 0      | 0      | 0      | 0      | 0      | 0      | 0      | 0      | 0      | 0      |
| Erythrobacter       | 2              | 80             | 0      | 0      | 0      | 0      | 0      | 0      | 0      | 0      | 0      | 0      | 0      | 0      | 1      | 0      | 0      | 0      | 0      | 0      |
| Escherichia         | 2              | 242            | 0      | 0      | 0      | 0      | 0      | 0      | 1      | 0      | 1      | 0      | 0      | 1      | 0      | 0      | 0      | 0      | 0      | 0      |
| Ethanoligenens      | 2              | 69             | 0      | 0      | 0      | 0      | 0      | 0      | 0      | 0      | 0      | 0      | 0      | 0      | 0      | 0      | 0      | 0      | 0      | 0      |
| Eubacteriaceae      | 1              | 2              | 0      | 0      | 0      | 0      | 0      | 0      | 0      | 0      | 0      | 0      | 0      | 0      | 0      | 0      | 0      | 0      | 0      | 0      |
| Eubacterium         | 2              | 103            | 0      | 0      | 0      | 0      | 0      | 0      | 0      | 0      | 0      | 0      | 0      | 0      | 0      | 0      | 0      | 0      | 0      | 0      |
| Eudoraea            | 1              | 4              | 0      | 0      | 0      | 0      | 0      | 0      | 0      | 0      | 0      | 0      | 0      | 0      | 0      | 0      | 0      | 0      | 0      | 0      |
| Euryarchaeota       | 1              | 1              | 0      | 0      | 0      | 0      | 0      | 0      | 0      | 0      | 0      | 0      | 0      | 0      | 0      | 0      | 0      | 0      | 0      | 0      |
| Exiguobacterium     | 2              | 93             | 0      | 0      | 0      | 0      | 0      | 0      | 0      | 0      | 0      | 0      | 0      | 0      | 0      | 0      | 0      | 0      | 0      | 0      |
| Faecalibacterium    | 1              | 12             | 0      | 0      | 0      | 0      | 0      | 0      | 0      | 0      | 0      | 0      | 0      | 0      | 0      | 0      | 0      | 0      | 0      | 0      |
| Ferrimonas          | 2              | 115            | 0      | 0      | 0      | 0      | 0      | 0      | 0      | 0      | 0      | 0      | 0      | 0      | 0      | 0      | 0      | 0      | 0      | 0      |
| Ferroglobus         | 1              | 14             | 1      | 0      | 0      | 0      | 0      | 0      | 0      | 0      | 0      | 0      | 0      | 1      | 0      | 0      | 0      | 1      | 0      | 0      |
| Ferroplasma         | 1              | 11             | 0      | 0      | 0      | 0      | 0      | 0      | 0      | 0      | 0      | 0      | 0      | 0      | 0      | 0      | 0      | 0      | 0      | 0      |
| Fervidicoccus       | 1              | 7              | 0      | 0      | 0      | 0      | 0      | 0      | 0      | 0      | 0      | 0      | 0      | 0      | 0      | 0      | 0      | 0      | 0      | 0      |
| Fervidobacterium    | 2              | 54             | 0      | 0      | 0      | 0      | 0      | 0      | 0      | 0      | 0      | 0      | 0      | 0      | 0      | 0      | 0      | 0      | 0      | 0      |
| Fibrella            | 1              | 17             | 0      | 0      | 0      | 0      | 0      | 0      | 0      | 0      | 0      | 0      | 0      | 0      | 0      | 0      | 0      | 0      | 0      | 0      |
| Fibrobacter         | 2              | 52             | 0      | 0      | 0      | 0      | 0      | 0      | 0      | 0      | 0      | 0      | 0      | 0      | 0      | 0      | 0      | 0      | 0      | 0      |
| Filifactor          | 1              | 9              | 0      | 0      | 0      | 0      | 0      | 0      | 0      | 0      | 0      | 0      | 0      | 0      | 0      | 0      | 0      | 0      | 0      | 0      |
| Finegoldia          | 2              | 55             | 0      | 0      | 0      | 0      | 0      | 0      | 0      | 0      | 0      | 0      | 0      | 0      | 0      | 0      | 0      | 0      | 0      | 0      |
| Firmicutes          | 1              | 15             | 0      | 0      | 0      | 0      | 0      | 0      | 0      | 0      | 0      | 0      | 0      | 0      | 0      | 0      | 0      | 0      | 0      | 0      |
| Fischerella         | 1              | 15             | 0      | 0      | 0      | 0      | 0      | 0      | 0      | 0      | 0      | 0      | 0      | 0      | 0      | 0      | 0      | 0      | 0      | 0      |
| Flavobacteria       | 1              | 7              | 0      | 0      | 0      | 0      | 0      | 0      | 0      | 0      | 0      | 0      | 0      | 0      | 0      | 0      | 0      | 0      | 0      | 0      |
| Flavobacteriaceae   | 2              | 69             | 0      | 0      | 0      | 0      | 0      | 0      | 0      | 0      | 0      | 0      | 0      | 0      | 0      | 0      | 0      | 0      | 0      | 0      |
| Flavobacteriales    | 1              | 3              | 0      | 0      | 0      | 0      | 0      | 0      | 0      | 0      | 0      | 0      | 0      | 0      | 0      | 0      | 0      | 0      | 0      | 0      |
| Flavobacterium      | 2              | 103            | 0      | 0      | 0      | 0      | 0      | 0      | 0      | 0      | 0      | 0      | 0      | 1      | 0      | 0      | 0      | 0      | 0      | 0      |
| Flexibacter         | 1              | 17             | 0      | 0      | 0      | 0      | 0      | 0      | 0      | 0      | 0      | 0      | 0      | 0      | 0      | 0      | 0      | 0      | 0      | 0      |
| Flexistipes         | 1              | 11             | 0      | 0      | 0      | 0      | 0      | 0      | 0      | 0      | 0      | 0      | 0      | 1      | 0      | 0      | 0      | 0      | 0      | 0      |
| Fluoribacter        | 1              | 6              | 0      | 0      | 0      | 0      | 0      | 0      | 0      | 0      | 0      | 0      | 0      | 0      | 0      | 0      | 0      | 0      | 0      | 0      |
| Fluviicola          | 2              | 69             | 0      | 0      | 0      | 0      | 0      | 0      | 0      | 0      | 0      | 0      | 0      | 0      | 0      | 0      | 0      | 0      | 0      | 0      |
| Formosa             | 1              | 2              | 0      | 0      | 0      | 0      | 0      | 0      | 0      | 0      | 0      | 0      | 0      | 0      | 0      | 0      | 0      | 0      | 0      | 0      |
| Francisella         | 2              | 88             | 0      | 0      | 0      | 0      | 0      | 0      | 0      | 0      | 0      | 0      | 0      | 0      | 0      | 0      | 0      | 0      | 0      | 0      |
| Frankia             | 3              | 202            | 0      | 1      | 0      | 0      | 0      | 0      | 1      | 0      | 0      | 0      | 0      | 1      | 1      | 0      | 0      | 1      | 0      | 0      |
| Frateuria           | 1              | 25             | 0      | 0      | 0      | 0      | 0      | 0      | 0      | 0      | 0      | 0      | 0      | 0      | 0      | 0      | 0      | 0      | 0      | 0      |
| Fructobacillus      | 1              | 2              | 0      | 0      | 0      | 0      | 0      | 0      | 0      | 0      | 0      | 0      | 0      | 0      | 0      | 0      | 0      | 0      | 0      | 0      |
| Fulvimarina         | 1              | 2              | 0      | 0      | 0      | 0      | 0      | 0      | 0      | 0      | 0      | 0      | 0      | 0      | 0      | 0      | 0      | 0      | 0      | 0      |
| Fusobacterium       | 1              | 48             | 0      | 0      | 0      | 0      | 0      | 0      | 0      | 0      | 0      | 0      | 0      | 0      | 0      | 0      | 0      | 0      | 0      | 0      |
| Gallibacterium      | 2              | 87             | 0      | 0      | 0      | 0      | 0      | 0      | 0      | 0      | 0      | 0      | 0      | 0      | 0      | 0      | 0      | 0      | 0      | 0      |
| Gallionella         | 2              | 67             | 0      | 0      | 0      | 0      | 0      | 0      | 0      | 0      | 0      | 0      | 0      | 0      | 0      | 0      | 0      | 0      | 0      | 0      |
| Gammaproteobacteria | 1              | 9              | 0      | 0      | 0      | 0      | 0      | 0      | 0      | 0      | 0      | 0      | 0      | 0      | 0      | 0      | 0      | 0      | 0      | 0      |
| Gardnerella         | 1              | 31             | 0      | 0      | 0      | 0      | 0      | 0      | 0      | 0      | 0      | 0      | 0      | 0      | 0      | 0      | 0      | 0      | 0      | 0      |
| Geitlerinema        | 1              | 9              | 0      | 0      | 0      | 0      | 0      | 0      | 0      | 0      | 0      | 0      | 0      | 0      | 0      | 0      | 0      | 0      | 0      | 0      |
| Gemmatimonas        | 2              | 93             | 0      | 0      | 0      | 0      | 0      | 0      | 0      | 0      | 0      | 0      | 0      | 1      | 0      | 0      | 0      | 0      | 0      | 0      |
| Geobacillus         | 2              | 168            | 0      | 1      | 0      | 0      | 0      | 0      | 0      | 0      | 0      | 0      | 0      | 1      | 1      | 0      | 0      | 0      | 0      | 0      |
| Geobacter           | 2              | 150            | 1      | 0      | 0      | 0      | 1      | 0      | 0      | 0      | 0      | 0      | 0      | 1      | 0      | 0      | 0      | 0      | 0      | 1      |
| Geodermatophilus    | 2              | 136            | 0      | 0      | 0      | 0      | 0      | 0      | 1      | 0      | 0      | 0      | 0      | 0      | 1      | 0      | 0      | 1      | 0      | 0      |
| Geopsychrobacter    | 1              | 2              | 0      | 0      | 0      | 0      | 0      | 0      | 0      | 0      | 0      | 0      | 0      | 0      | 0      | 0      | 0      | 0      | 0      | 0      |
| Gillisia            | 1              | 11             | 0      | 0      | 0      | 0      | 0      | 0      | 0      | 0      | 0      | 0      | 0      | 0      | 0      | 0      | 0      | 0      | 0      | 0      |
| Gilvimarinus        | 1              | 4              | 0      | 0      | 0      | 0      | 0      | 0      | 0      | 0      | 0      | 0      | 0      | 0      | 0      | 0      | 0      | 0      | 0      | 0      |
| Glaciecola          | 2              | 117            | 0      | 0      | 0      | 0      | 0      | 0      | 0      | 0      | 0      | 0      | 0      | 1      | 1      | 0      | 0      | 0      | 0      | 0      |

| Genus             | Cluster Number | Protein Counts | K04112 | K04116 | K04117 | K04118 | K05296 | K05394 | K05549 | K05599 | K05783 | K05898 | K05913 | K06281 | K06446 | K06912 | K07408 | K07535 | K07536 | K07537 |
|-------------------|----------------|----------------|--------|--------|--------|--------|--------|--------|--------|--------|--------|--------|--------|--------|--------|--------|--------|--------|--------|--------|
| Gloeobacter       | 2              | 67             | 0      | 0      | 0      | 0      | 0      | 0      | 0      | 0      | 0      | 0      | 0      | 0      | 0      | 0      | 0      | 0      | 0      | 0      |
| Gloeocapsa        | 1              | 20             | 0      | 0      | 0      | 0      | 0      | 0      | 0      | 0      | 0      | 0      | 0      | 0      | 0      | 0      | 0      | 0      | 0      | 0      |
| Gloeotheca        | 1              | 1              | 0      | 0      | 0      | 0      | 0      | 0      | 0      | 0      | 0      | 0      | 0      | 1      | 0      | 0      | 0      | 0      | 0      | 0      |
| Gluconacetobacter | 2              | 96             | 0      | 0      | 0      | 0      | 0      | 0      | 0      | 0      | 0      | 0      | 0      | 0      | 0      | 0      | 0      | 0      | 0      | 0      |
| Gluconobacter     | 2              | 76             | 0      | 0      | 0      | 0      | 0      | 0      | 0      | 0      | 0      | 0      | 0      | 0      | 0      | 0      | 0      | 0      | 0      | 0      |
| Gordonia          | 1              | 158            | 0      | 0      | 0      | 0      | 0      | 0      | 1      | 0      | 0      | 1      | 0      | 1      | 1      | 0      | 0      | 1      | 0      | 0      |
| Gordonibacter     | 1              | 32             | 0      | 0      | 0      | 0      | 0      | 0      | 0      | 0      | 0      | 0      | 0      | 1      | 0      | 0      | 0      | 0      | 0      | 0      |
| Gramella          | 2              | 104            | 0      | 0      | 0      | 0      | 0      | 0      | 0      | 0      | 0      | 0      | 0      | 0      | 0      | 0      | 0      | 0      | 0      | 0      |
| Granulibacter     | 2              | 90             | 0      | 0      | 0      | 0      | 0      | 0      | 0      | 0      | 0      | 0      | 0      | 0      | 0      | 0      | 0      | 0      | 0      | 0      |
| Granulicella      | 2              | 98             | 0      | 0      | 0      | 0      | 0      | 0      | 0      | 0      | 0      | 0      | 0      | 1      | 0      | 0      | 0      | 0      | 0      | 0      |
| Grimontia         | 1              | 9              | 0      | 0      | 0      | 0      | 0      | 0      | 0      | 0      | 0      | 0      | 0      | 0      | 0      | 0      | 0      | 0      | 0      | 0      |
| Haemophilus       | 2              | 117            | 0      | 0      | 0      | 0      | 0      | 0      | 0      | 0      | 0      | 0      | 0      | 1      | 0      | 0      | 0      | 0      | 0      | 0      |
| Hafnia            | 1              | 29             | 0      | 0      | 0      | 0      | 0      | 0      | 0      | 0      | 0      | 0      | 0      | 0      | 0      | 0      | 0      | 0      | 0      | 0      |
| Hahella           | 3              | 130            | 0      | 0      | 0      | 0      | 0      | 0      | 0      | 0      | 0      | 0      | 0      | 0      | 0      | 0      | 0      | 0      | 0      | 0      |
| Halalkalicoccus   | 1              | 18             | 0      | 0      | 0      | 0      | 0      | 0      | 0      | 0      | 0      | 0      | 0      | 0      | 0      | 0      | 0      | 0      | 0      | 0      |
| Halanaerobium     | 2              | 89             | 0      | 0      | 0      | 0      | 0      | 0      | 0      | 0      | 0      | 0      | 0      | 0      | 0      | 0      | 0      | 0      | 0      | 0      |
| Haliangium        | 2              | 108            | 0      | 0      | 0      | 0      | 0      | 0      | 0      | 0      | 0      | 0      | 0      | 0      | 0      | 0      | 0      | 0      | 0      | 0      |
| Haliscomenobacter | 2              | 107            | 0      | 0      | 0      | 0      | 0      | 0      | 0      | 0      | 0      | 0      | 0      | 1      | 0      | 0      | 0      | 0      | 0      | 0      |
| Haloarcula        | 1              | 22             | 0      | 0      | 0      | 0      | 0      | 0      | 0      | 0      | 0      | 0      | 0      | 0      | 0      | 0      | 0      | 0      | 0      | 0      |
| Halobacillus      | 1              | 19             | 0      | 0      | 0      | 0      | 0      | 0      | 0      | 0      | 0      | 0      | 0      | 0      | 1      | 0      | 0      | 0      | 0      | 0      |
| Halobacteriaceae  | 1              | 1              | 0      | 0      | 0      | 0      | 0      | 0      | 0      | 0      | 0      | 0      | 0      | 0      | 0      | 0      | 0      | 0      | 0      | 0      |
| Halobacterium     | 1              | 10             | 0      | 0      | 0      | 0      | 0      | 0      | 0      | 0      | 0      | 0      | 0      | 0      | 0      | 0      | 0      | 0      | 0      | 0      |
| Halobacteroides   | 1              | 14             | 0      | 0      | 0      | 0      | 0      | 0      | 0      | 0      | 0      | 0      | 0      | 0      | 0      | 0      | 0      | 0      | 0      | 0      |
| Haloferax         | 1              | 20             | 0      | 0      | 0      | 0      | 0      | 0      | 0      | 0      | 0      | 0      | 0      | 0      | 0      | 0      | 0      | 0      | 0      | 0      |
| Halogeometricum   | 1              | 12             | 0      | 0      | 0      | 0      | 0      | 0      | 0      | 0      | 0      | 0      | 0      | 0      | 0      | 0      | 0      | 0      | 0      | 0      |
| Halomicrobium     | 1              | 10             | 0      | 0      | 0      | 0      | 0      | 0      | 0      | 0      | 0      | 0      | 0      | 0      | 0      | 0      | 0      | 0      | 0      | 0      |
| Halomonas         | 1              | 149            | 0      | 0      | 0      | 0      | 0      | 0      | 0      | 0      | 0      | 0      | 0      | 0      | 0      | 0      | 0      | 0      | 0      | 0      |
| Halopiger         | 1              | 16             | 0      | 0      | 0      | 0      | 0      | 0      | 0      | 0      | 0      | 0      | 0      | 0      | 0      | 0      | 0      | 0      | 0      | 0      |
| Haloquadratum     | 1              | 19             | 0      | 0      | 0      | 0      | 0      | 0      | 0      | 0      | 0      | 0      | 0      | 0      | 0      | 0      | 0      | 0      | 0      | 0      |
| Halorhabdus       | 1              | 10             | 0      | 0      | 0      | 0      | 0      | 0      | 0      | 0      | 0      | 0      | 0      | 0      | 0      | 0      | 0      | 0      | 0      | 0      |
| Halorhodospira    | 2              | 71             | 0      | 0      | 0      | 0      | 0      | 0      | 0      | 0      | 0      | 0      | 0      | 0      | 0      | 0      | 0      | 0      | 0      | 0      |
| Halorubrum        | 1              | 16             | 0      | 0      | 0      | 0      | 0      | 0      | 0      | 0      | 0      | 0      | 0      | 0      | 0      | 0      | 0      | 0      | 0      | 0      |
| Haloterrigena     | 1              | 19             | 0      | 0      | 0      | 0      | 0      | 0      | 0      | 0      | 0      | 0      | 0      | 0      | 0      | 0      | 0      | 0      | 0      | 0      |
| Halothece         | 1              | 9              | 0      | 0      | 0      | 0      | 0      | 0      | 0      | 0      | 0      | 0      | 0      | 0      | 0      | 0      | 0      | 0      | 0      | 0      |
| Halothermothrix   | 2              | 50             | 0      | 0      | 0      | 0      | 0      | 0      | 0      | 0      | 0      | 0      | 0      | 1      | 0      | 0      | 0      | 0      | 0      | 0      |
| Halothiobacillus  | 2              | 65             | 0      | 0      | 0      | 0      | 0      | 0      | 0      | 0      | 0      | 0      | 0      | 0      | 0      | 0      | 0      | 0      | 0      | 0      |
| Halovivax         | 1              | 12             | 0      | 0      | 0      | 0      | 0      | 0      | 0      | 0      | 0      | 0      | 0      | 0      | 0      | 0      | 0      | 0      | 0      | 0      |
| Helicobacter      | 2              | 79             | 0      | 0      | 0      | 0      | 0      | 0      | 0      | 0      | 0      | 0      | 0      | 0      | 0      | 0      | 0      | 0      | 0      | 0      |
| Heliobacillus     | 1              | 4              | 0      | 0      | 0      | 0      | 0      | 0      | 0      | 0      | 0      | 0      | 0      | 0      | 0      | 0      | 0      | 0      | 0      | 0      |
| Heliobacterium    | 2              | 51             | 0      | 0      | 0      | 0      | 0      | 0      | 0      | 0      | 0      | 0      | 0      | 0      | 0      | 0      | 0      | 0      | 0      | 0      |
| Herbaspirillum    | 2              | 172            | 0      | 0      | 0      | 0      | 0      | 0      | 1      | 0      | 1      | 0      | 0      | 0      | 0      | 0      | 0      | 0      | 0      | 0      |
| Herminiimonas     | 3              | 89             | 0      | 0      | 0      | 0      | 0      | 0      | 0      | 0      | 0      | 0      | 0      | 0      | 0      | 0      | 0      | 0      | 0      | 0      |
| Herpetosiphon     | 3              | 90             | 0      | 0      | 1      | 0      | 0      | 0      | 0      | 0      | 0      | 0      | 0      | 0      | 0      | 0      | 0      | 0      | 0      | 0      |
| Hippea            | 2              | 44             | 0      | 0      | 0      | 0      | 0      | 0      | 0      | 0      | 0      | 0      | 0      | 0      | 0      | 0      | 0      | 0      | 0      | 0      |
| Hirschia          | 2              | 102            | 0      | 0      | 0      | 0      | 0      | 0      | 0      | 0      | 0      | 0      | 0      | 0      | 0      | 0      | 0      | 0      | 0      | 0      |
| Histophilus       | 2              | 72             | 0      | 0      | 0      | 0      | 0      | 0      | 0      | 0      | 0      | 0      | 0      | 0      | 0      | 0      | 0      | 0      | 0      | 0      |
| Hoeflea           | 1              | 16             | 0      | 0      | 0      | 0      | 0      | 0      | 0      | 0      | 0      | 0      | 0      | 0      | 0      | 0      | 0      | 0      | 0      | 0      |
| Hydrogenivirga    | 1              | 2              | 0      | 0      | 0      | 0      | 0      | 0      | 0      | 0      | 0      | 0      | 0      | 0      | 0      | 0      | 0      | 0      | 0      | 0      |
| Hydrogenobacter   | 2              | 55             | 0      | 0      | 0      | 0      | 0      | 0      | 0      | 0      | 0      | 0      | 0      | 1      | 0      | 0      | 0      | 0      | 0      | 0      |
| Hydrogenobaculum  | 2              | 44             | 0      | 0      | 0      | 0      | 0      | 0      | 0      | 0      | 0      | 0      | 0      | 1      | 0      | 0      | 0      | 0      | 0      | 0      |
| Hydrogenophaga    | 1              | 9              | 0      | 0      | 0      | 0      | 0      | 0      | 0      | 0      | 0      | 0      | 0      | 0      | 0      | 0      | 0      | 0      | 0      | 0      |
| Hylemonella       | 1              | 4              | 0      | 0      | 0      | 0      | 0      | 0      | 0      | 0      | 0      | 0      | 0      | 0      | 0      | 0      | 0      | 0      | 0      | 0      |

| Genus                 | Cluster Number | Protein Counts | K04112 | K04116 | K04117 | K04118 | K05296 | K05394 | K05549 | K05599 | K05783 | K05898 | K05913 | K06281 | K06446 | K06912 | K07408 | K07535 | K07536 | K07537 |
|-----------------------|----------------|----------------|--------|--------|--------|--------|--------|--------|--------|--------|--------|--------|--------|--------|--------|--------|--------|--------|--------|--------|
| Hyperthermus          | 1              | 6              | 0      | 0      | 0      | 0      | 0      | 0      | 0      | 0      | 0      | 0      | 0      | 1      | 0      | 0      | 0      | 0      | 0      | 0      |
| Hyphomicrobium        | 2              | 93             | 0      | 0      | 0      | 0      | 0      | 0      | 0      | 0      | 0      | 0      | 0      | 1      | 0      | 0      | 0      | 0      | 0      | 0      |
| Hyphomonas            | 3              | 105            | 0      | 0      | 0      | 0      | 0      | 0      | 0      | 0      | 0      | 0      | 0      | 0      | 1      | 0      | 0      | 0      | 0      | 0      |
| Ideonella             | 1              | 18             | 0      | 0      | 0      | 0      | 0      | 0      | 0      | 0      | 0      | 0      | 0      | 0      | 0      | 0      | 0      | 0      | 0      | 0      |
| Idiomarina            | 2              | 86             | 0      | 0      | 0      | 0      | 0      | 0      | 0      | 0      | 0      | 0      | 0      | 0      | 0      | 0      | 0      | 0      | 0      | 0      |
| Ignavibacterium       | 1              | 14             | 0      | 0      | 0      | 0      | 0      | 0      | 0      | 0      | 0      | 0      | 0      | 0      | 0      | 0      | 0      | 0      | 0      | 0      |
| Ignicoccus            | 1              | 5              | 0      | 0      | 0      | 0      | 0      | 0      | 0      | 0      | 0      | 0      | 0      | 1      | 0      | 0      | 0      | 0      | 0      | 0      |
| Ignisphaera           | 1              | 8              | 0      | 0      | 0      | 0      | 0      | 0      | 0      | 0      | 0      | 0      | 0      | 0      | 0      | 0      | 0      | 0      | 0      | 0      |
| Ilyobacter            | 2              | 85             | 0      | 0      | 0      | 0      | 0      | 0      | 0      | 0      | 0      | 0      | 0      | 0      | 0      | 0      | 0      | 0      | 0      | 0      |
| Intrasporangium       | 2              | 114            | 0      | 1      | 1      | 0      | 0      | 0      | 0      | 0      | 0      | 0      | 0      | 0      | 0      | 0      | 0      | 1      | 0      | 0      |
| Isoptericola          | 1              | 18             | 0      | 0      | 0      | 0      | 0      | 0      | 0      | 0      | 0      | 0      | 0      | 0      | 0      | 0      | 0      | 0      | 0      | 0      |
| Isosphaera            | 2              | 75             | 0      | 0      | 0      | 0      | 0      | 0      | 0      | 0      | 0      | 0      | 0      | 0      | 0      | 0      | 0      | 0      | 0      | 0      |
| Jannaschia            | 3              | 151            | 0      | 0      | 0      | 0      | 0      | 0      | 0      | 0      | 0      | 0      | 0      | 0      | 0      | 0      | 0      | 0      | 0      | 0      |
| Janthinobacterium     | 2              | 99             | 0      | 0      | 0      | 0      | 0      | 0      | 0      | 0      | 0      | 0      | 0      | 0      | 0      | 0      | 0      | 0      | 0      | 0      |
| Jonesia               | 2              | 56             | 0      | 0      | 0      | 0      | 0      | 0      | 0      | 0      | 0      | 0      | 0      | 0      | 0      | 0      | 0      | 0      | 0      | 0      |
| Joostella             | 1              | 3              | 0      | 0      | 0      | 0      | 0      | 0      | 0      | 0      | 0      | 0      | 0      | 0      | 0      | 0      | 0      | 0      | 0      | 0      |
| Kaistia               | 1              | 2              | 0      | 0      | 0      | 0      | 0      | 0      | 0      | 0      | 0      | 0      | 0      | 0      | 0      | 0      | 0      | 0      | 0      | 0      |
| Kangiella             | 2              | 84             | 0      | 0      | 0      | 0      | 0      | 0      | 0      | 0      | 0      | 0      | 0      | 0      | 0      | 0      | 0      | 0      | 0      | 0      |
| Ketogulonicigenium    | 2              | 102            | 0      | 0      | 0      | 0      | 0      | 0      | 0      | 0      | 0      | 0      | 0      | 0      | 0      | 0      | 0      | 0      | 0      | 0      |
| Kineococcus           | 1              | 24             | 0      | 0      | 0      | 0      | 0      | 0      | 0      | 0      | 0      | 0      | 0      | 0      | 0      | 0      | 0      | 0      | 0      | 0      |
| Kinetoplastibacterium | 1              | 2              | 0      | 0      | 0      | 0      | 0      | 0      | 0      | 0      | 0      | 0      | 0      | 0      | 0      | 0      | 0      | 0      | 0      | 0      |
| Kingella              | 1              | 4              | 0      | 0      | 0      | 0      | 0      | 0      | 0      | 0      | 0      | 0      | 0      | 0      | 0      | 0      | 0      | 0      | 0      | 0      |
| Kitasatospora         | 1              | 36             | 0      | 0      | 0      | 0      | 0      | 0      | 0      | 0      | 0      | 0      | 0      | 0      | 0      | 0      | 0      | 0      | 0      | 0      |
| Klebsiella            | 3              | 222            | 0      | 0      | 0      | 0      | 0      | 0      | 1      | 0      | 1      | 0      | 0      | 0      | 0      | 0      | 0      | 0      | 0      | 0      |
| Kluyvera              | 1              | 1              | 0      | 0      | 0      | 0      | 0      | 0      | 0      | 0      | 0      | 0      | 0      | 0      | 0      | 0      | 0      | 0      | 0      | 0      |
| Kocuria               | 2              | 87             | 0      | 0      | 0      | 0      | 0      | 0      | 0      | 0      | 0      | 0      | 0      | 0      | 0      | 0      | 0      | 0      | 0      | 0      |
| Kordia                | 1              | 5              | 0      | 0      | 0      | 0      | 0      | 0      | 0      | 0      | 0      | 0      | 0      | 0      | 0      | 0      | 0      | 0      | 0      | 0      |
| Kosmotoga             | 2              | 61             | 0      | 0      | 0      | 0      | 0      | 0      | 0      | 0      | 0      | 0      | 0      | 0      | 0      | 0      | 0      | 0      | 0      | 0      |
| Kribbella             | 2              | 99             | 0      | 0      | 0      | 0      | 0      | 0      | 0      | 0      | 0      | 0      | 0      | 0      | 0      | 0      | 0      | 0      | 0      | 0      |
| Krokinobacter         | 2              | 90             | 0      | 0      | 0      | 0      | 0      | 0      | 0      | 0      | 0      | 0      | 0      | 0      | 0      | 0      | 0      | 0      | 0      | 0      |
| Kyrpidia              | 2              | 113            | 0      | 0      | 0      | 0      | 0      | 0      | 0      | 0      | 0      | 0      | 0      | 1      | 1      | 0      | 0      | 1      | 0      | 0      |
| Kytococcus            | 2              | 70             | 0      | 0      | 0      | 0      | 0      | 0      | 0      | 0      | 0      | 0      | 0      | 0      | 0      | 0      | 0      | 0      | 0      | 0      |
| Labrenzia             | 1              | 4              | 0      | 0      | 0      | 0      | 0      | 0      | 0      | 0      | 0      | 0      | 0      | 0      | 0      | 0      | 0      | 0      | 0      | 0      |
| Lachnoanaerobaculum   | 1              | 1              | 0      | 0      | 0      | 0      | 0      | 0      | 0      | 0      | 0      | 0      | 0      | 0      | 0      | 0      | 0      | 0      | 0      | 0      |
| Lachnospiraceae       | 1              | 51             | 0      | 0      | 0      | 0      | 0      | 0      | 0      | 0      | 0      | 0      | 0      | 0      | 0      | 0      | 0      | 0      | 0      | 0      |
| Lacinutrix            | 1              | 20             | 0      | 0      | 0      | 0      | 0      | 0      | 0      | 0      | 0      | 0      | 0      | 0      | 0      | 0      | 0      | 0      | 0      | 0      |
| Lactobacillus         | 2              | 119            | 0      | 0      | 0      | 0      | 0      | 0      | 0      | 0      | 0      | 0      | 0      | 0      | 0      | 0      | 0      | 0      | 0      | 0      |
| Lactococcus           | 2              | 82             | 0      | 0      | 0      | 0      | 0      | 0      | 0      | 0      | 0      | 0      | 0      | 0      | 0      | 0      | 0      | 0      | 0      | 0      |
| Lamprocystis          | 1              | 2              | 0      | 0      | 0      | 0      | 0      | 0      | 0      | 0      | 0      | 0      | 0      | 0      | 0      | 0      | 0      | 0      | 0      | 0      |
| Laribacter            | 2              | 80             | 0      | 0      | 0      | 0      | 0      | 0      | 0      | 0      | 0      | 0      | 0      | 0      | 1      | 0      | 0      | 0      | 0      | 0      |
| Lawsonia              | 2              | 33             | 0      | 0      | 0      | 0      | 0      | 0      | 0      | 0      | 0      | 0      | 0      | 1      | 0      | 0      | 0      | 0      | 0      | 0      |
| Leadbetterella        | 2              | 79             | 0      | 0      | 0      | 0      | 0      | 0      | 0      | 0      | 0      | 0      | 0      | 0      | 0      | 0      | 0      | 0      | 0      | 0      |
| Leeuwenhoekiiella     | 1              | 2              | 0      | 0      | 0      | 0      | 0      | 0      | 0      | 0      | 0      | 0      | 0      | 0      | 0      | 0      | 0      | 0      | 0      | 0      |
| Legionella            | 2              | 117            | 0      | 0      | 0      | 0      | 0      | 0      | 0      | 0      | 0      | 0      | 0      | 0      | 0      | 0      | 0      | 0      | 0      | 0      |
| Leifsonia             | 2              | 48             | 0      | 0      | 0      | 0      | 0      | 0      | 0      | 0      | 0      | 0      | 0      | 0      | 0      | 0      | 0      | 0      | 0      | 0      |
| Leptolyngbya          | 1              | 10             | 0      | 0      | 0      | 0      | 0      | 0      | 0      | 0      | 0      | 0      | 0      | 0      | 0      | 0      | 0      | 0      | 0      | 0      |
| Leptospira            | 2              | 76             | 0      | 0      | 0      | 0      | 0      | 0      | 0      | 0      | 0      | 0      | 0      | 0      | 0      | 0      | 0      | 0      | 0      | 0      |
| Leptospirillum        | 1              | 10             | 0      | 0      | 0      | 0      | 0      | 0      | 0      | 0      | 0      | 0      | 0      | 1      | 0      | 0      | 0      | 0      | 0      | 0      |
| Leptothrix            | 3              | 186            | 0      | 1      | 1      | 0      | 0      | 0      | 0      | 0      | 0      | 0      | 0      | 1      | 1      | 0      | 0      | 1      | 1      | 0      |
| Leptotrichia          | 2              | 43             | 0      | 0      | 0      | 0      | 0      | 0      | 0      | 0      | 0      | 0      | 0      | 0      | 0      | 0      | 0      | 0      | 0      | 0      |
| Leucobacter           | 1              | 2              | 0      | 0      | 0      | 0      | 0      | 0      | 0      | 0      | 0      | 0      | 0      | 0      | 0      | 0      | 0      | 0      | 0      | 0      |
| Leuconostoc           | 2              | 64             | 0      | 0      | 0      | 0      | 0      | 0      | 0      | 0      | 0      | 0      | 0      | 0      | 0      | 0      | 0      | 0      | 0      | 0      |

| Genus                | Cluster Number | Protein Counts | K04112 | K04116 | K04117 | K04118 | K05296 | K05394 | K05549 | K05599 | K05783 | K05898 | K05913 | K06281 | K06446 | K06912 | K07408 | K07535 | K07536 | K07537 |
|----------------------|----------------|----------------|--------|--------|--------|--------|--------|--------|--------|--------|--------|--------|--------|--------|--------|--------|--------|--------|--------|--------|
| Liberibacter         | 1              | 4              | 0      | 0      | 0      | 0      | 0      | 0      | 0      | 0      | 0      | 0      | 0      | 0      | 0      | 0      | 0      | 0      | 0      | 0      |
| Limnohabitans        | 1              | 11             | 0      | 0      | 0      | 0      | 0      | 0      | 0      | 0      | 0      | 0      | 0      | 0      | 0      | 0      | 0      | 0      | 0      | 0      |
| Listeria             | 2              | 77             | 0      | 0      | 0      | 0      | 0      | 0      | 0      | 0      | 0      | 0      | 0      | 0      | 0      | 0      | 0      | 0      | 0      | 0      |
| Listeriaceae         | 1              | 6              | 0      | 0      | 0      | 0      | 0      | 0      | 0      | 0      | 0      | 0      | 0      | 0      | 0      | 0      | 0      | 0      | 0      | 0      |
| Listonella           | 1              | 38             | 0      | 0      | 0      | 0      | 0      | 0      | 0      | 0      | 0      | 0      | 0      | 0      | 0      | 0      | 0      | 0      | 0      | 0      |
| Loktanella           | 1              | 3              | 0      | 0      | 0      | 0      | 0      | 0      | 0      | 0      | 0      | 0      | 0      | 0      | 0      | 0      | 0      | 0      | 0      | 0      |
| Lysinibacillus       | 2              | 97             | 0      | 0      | 0      | 0      | 0      | 0      | 0      | 0      | 0      | 1      | 0      | 0      | 0      | 0      | 0      | 0      | 0      | 0      |
| Macrococcus          | 2              | 60             | 0      | 0      | 0      | 0      | 0      | 0      | 0      | 0      | 0      | 0      | 0      | 0      | 0      | 0      | 0      | 0      | 0      | 0      |
| Magnetococcus        | 2              | 64             | 0      | 0      | 0      | 0      | 0      | 0      | 0      | 0      | 0      | 0      | 0      | 1      | 0      | 0      | 0      | 0      | 0      | 0      |
| Magnetospirillum     | 2              | 113            | 1      | 0      | 0      | 0      | 0      | 0      | 0      | 0      | 0      | 0      | 0      | 1      | 1      | 0      | 0      | 1      | 0      | 1      |
| Mahella              | 2              | 58             | 0      | 0      | 0      | 0      | 0      | 0      | 0      | 0      | 0      | 0      | 0      | 0      | 0      | 0      | 0      | 0      | 0      | 0      |
| Mannheimia           | 2              | 85             | 0      | 0      | 0      | 0      | 0      | 0      | 0      | 0      | 0      | 0      | 0      | 1      | 0      | 0      | 0      | 0      | 0      | 0      |
| Maribacter           | 3              | 87             | 0      | 0      | 0      | 0      | 0      | 0      | 0      | 0      | 0      | 0      | 0      | 0      | 0      | 0      | 0      | 0      | 0      | 0      |
| Maricaulis           | 3              | 87             | 0      | 0      | 0      | 0      | 0      | 0      | 0      | 0      | 0      | 0      | 0      | 0      | 0      | 0      | 0      | 0      | 0      | 0      |
| Marichromatium       | 1              | 2              | 0      | 0      | 0      | 0      | 0      | 0      | 0      | 0      | 0      | 0      | 0      | 0      | 0      | 0      | 0      | 0      | 0      | 0      |
| Marinithermus        | 2              | 77             | 0      | 0      | 0      | 0      | 0      | 0      | 0      | 0      | 0      | 0      | 0      | 0      | 0      | 0      | 0      | 0      | 0      | 0      |
| Marinitoga           | 1              | 15             | 0      | 0      | 0      | 0      | 0      | 0      | 0      | 0      | 0      | 0      | 0      | 0      | 0      | 0      | 0      | 0      | 0      | 0      |
| Marinobacter         | 2              | 163            | 0      | 1      | 0      | 0      | 0      | 0      | 1      | 0      | 1      | 0      | 0      | 0      | 1      | 0      | 0      | 0      | 1      | 0      |
| Marinomonas          | 3              | 192            | 0      | 0      | 0      | 0      | 0      | 0      | 1      | 0      | 1      | 0      | 0      | 0      | 0      | 0      | 1      | 0      | 0      | 0      |
| Maritimibacter       | 1              | 7              | 0      | 0      | 0      | 0      | 0      | 0      | 0      | 0      | 0      | 0      | 0      | 0      | 0      | 0      | 0      | 0      | 0      | 0      |
| Marivirga            | 2              | 96             | 0      | 0      | 0      | 0      | 0      | 0      | 0      | 0      | 0      | 0      | 0      | 0      | 0      | 0      | 0      | 0      | 0      | 0      |
| Martella             | 1              | 3              | 0      | 0      | 0      | 0      | 0      | 0      | 0      | 0      | 0      | 0      | 0      | 0      | 0      | 0      | 0      | 0      | 0      | 0      |
| Marvinbryantia       | 1              | 1              | 0      | 0      | 0      | 0      | 0      | 0      | 0      | 0      | 0      | 0      | 0      | 0      | 0      | 0      | 0      | 0      | 0      | 0      |
| Massilia             | 1              | 4              | 0      | 0      | 0      | 0      | 0      | 0      | 0      | 0      | 0      | 0      | 0      | 0      | 0      | 0      | 0      | 0      | 0      | 0      |
| Mastigocladopsis     | 1              | 16             | 0      | 0      | 0      | 0      | 0      | 0      | 0      | 0      | 0      | 0      | 0      | 0      | 0      | 0      | 0      | 0      | 0      | 0      |
| Megamonas            | 1              | 47             | 0      | 0      | 0      | 0      | 0      | 0      | 0      | 0      | 0      | 0      | 0      | 1      | 0      | 0      | 0      | 0      | 0      | 0      |
| Megasphaera          | 1              | 14             | 0      | 0      | 0      | 0      | 0      | 0      | 0      | 0      | 0      | 0      | 0      | 0      | 0      | 0      | 0      | 0      | 0      | 0      |
| Meiothermus          | 2              | 110            | 0      | 0      | 0      | 0      | 0      | 0      | 0      | 0      | 0      | 0      | 0      | 0      | 0      | 0      | 0      | 0      | 0      | 0      |
| Melissococcus        | 2              | 46             | 0      | 0      | 0      | 0      | 0      | 0      | 0      | 0      | 0      | 0      | 0      | 0      | 0      | 0      | 0      | 0      | 0      | 0      |
| Mesoflavibacter      | 1              | 6              | 0      | 0      | 0      | 0      | 0      | 0      | 0      | 0      | 0      | 0      | 0      | 0      | 0      | 0      | 0      | 0      | 0      | 0      |
| Mesoplasma           | 1              | 23             | 0      | 0      | 0      | 0      | 0      | 0      | 0      | 0      | 0      | 0      | 0      | 0      | 0      | 0      | 0      | 0      | 0      | 0      |
| Mesorhizobium        | 2              | 201            | 0      | 0      | 0      | 0      | 0      | 0      | 0      | 0      | 0      | 0      | 0      | 1      | 0      | 0      | 0      | 0      | 0      | 0      |
| Mesotoga             | 1              | 14             | 0      | 0      | 0      | 0      | 0      | 0      | 0      | 0      | 0      | 0      | 0      | 0      | 0      | 0      | 0      | 0      | 0      | 0      |
| Metallosphaera       | 1              | 18             | 0      | 0      | 0      | 0      | 0      | 0      | 0      | 0      | 0      | 0      | 0      | 0      | 0      | 0      | 0      | 0      | 0      | 0      |
| Methanobacterium     | 1              | 7              | 0      | 0      | 0      | 0      | 0      | 0      | 0      | 0      | 0      | 0      | 0      | 0      | 0      | 0      | 0      | 0      | 0      | 0      |
| Methanobrevibacter   | 1              | 9              | 0      | 0      | 0      | 0      | 0      | 0      | 0      | 0      | 0      | 0      | 0      | 0      | 0      | 0      | 0      | 0      | 0      | 0      |
| Methanocaldococcus   | 1              | 6              | 0      | 0      | 0      | 0      | 0      | 0      | 0      | 0      | 0      | 0      | 0      | 0      | 0      | 0      | 0      | 0      | 0      | 0      |
| Methanocella         | 1              | 15             | 0      | 0      | 0      | 0      | 0      | 0      | 0      | 0      | 0      | 0      | 0      | 1      | 0      | 0      | 0      | 0      | 0      | 0      |
| Methanococcaceae     | 1              | 1              | 0      | 0      | 0      | 0      | 0      | 0      | 0      | 0      | 0      | 0      | 0      | 0      | 0      | 0      | 0      | 0      | 0      | 0      |
| Methanococcoides     | 1              | 5              | 0      | 0      | 0      | 0      | 0      | 0      | 0      | 0      | 0      | 0      | 0      | 0      | 0      | 0      | 0      | 0      | 0      | 0      |
| Methanococcus        | 1              | 9              | 0      | 0      | 0      | 0      | 0      | 0      | 0      | 0      | 0      | 0      | 0      | 0      | 0      | 0      | 0      | 0      | 0      | 0      |
| Methanocorpusculum   | 1              | 7              | 0      | 0      | 0      | 0      | 0      | 0      | 0      | 0      | 0      | 0      | 0      | 0      | 0      | 0      | 0      | 0      | 0      | 0      |
| Methanoculleus       | 1              | 8              | 0      | 0      | 0      | 0      | 0      | 0      | 0      | 0      | 0      | 0      | 0      | 0      | 0      | 0      | 0      | 0      | 0      | 0      |
| Methanohalobium      | 1              | 5              | 0      | 0      | 0      | 0      | 0      | 0      | 0      | 0      | 0      | 0      | 0      | 0      | 0      | 0      | 0      | 0      | 0      | 0      |
| Methanohalophilus    | 1              | 5              | 0      | 0      | 0      | 0      | 0      | 0      | 0      | 0      | 0      | 0      | 0      | 0      | 0      | 0      | 0      | 0      | 0      | 0      |
| Methanolobus         | 1              | 5              | 0      | 0      | 0      | 0      | 0      | 0      | 0      | 0      | 0      | 0      | 0      | 0      | 0      | 0      | 0      | 0      | 0      | 0      |
| Methanomethylovorans | 1              | 5              | 0      | 0      | 0      | 0      | 0      | 0      | 0      | 0      | 0      | 0      | 0      | 0      | 0      | 0      | 0      | 0      | 0      | 0      |
| Methanoplanus        | 1              | 7              | 0      | 0      | 0      | 0      | 0      | 0      | 0      | 0      | 0      | 0      | 0      | 0      | 0      | 0      | 0      | 0      | 0      | 0      |
| Methanopyrus         | 1              | 4              | 0      | 0      | 0      | 0      | 0      | 0      | 0      | 0      | 0      | 0      | 0      | 0      | 0      | 0      | 0      | 0      | 0      | 0      |
| Methanoregula        | 1              | 8              | 0      | 0      | 0      | 0      | 0      | 0      | 0      | 0      | 0      | 0      | 0      | 0      | 0      | 0      | 0      | 0      | 0      | 0      |
| Methanosaeta         | 1              | 9              | 0      | 0      | 0      | 0      | 0      | 0      | 0      | 0      | 0      | 0      | 0      | 0      | 0      | 0      | 0      | 0      | 0      | 0      |
| Methanosalsum        | 1              | 7              | 0      | 0      | 0      | 0      | 0      | 0      | 0      | 0      | 0      | 0      | 0      | 1      | 0      | 0      | 0      | 0      | 0      | 0      |

| Genus               | Cluster Number | Protein Counts | K04112 | K04116 | K04117 | K04118 | K05296 | K05394 | K05549 | K05599 | K05783 | K05898 | K05913 | K06281 | K06446 | K06912 | K07408 | K07535 | K07536 | K07537 |
|---------------------|----------------|----------------|--------|--------|--------|--------|--------|--------|--------|--------|--------|--------|--------|--------|--------|--------|--------|--------|--------|--------|
| Methanosarcina      | 1              | 18             | 0      | 0      | 0      | 0      | 0      | 0      | 0      | 0      | 0      | 0      | 0      | 0      | 0      | 0      | 0      | 0      | 0      | 0      |
| Methanosphaera      | 1              | 7              | 0      | 0      | 0      | 0      | 0      | 0      | 0      | 0      | 0      | 0      | 0      | 0      | 0      | 0      | 0      | 0      | 0      | 0      |
| Methanosphaerula    | 1              | 8              | 0      | 0      | 0      | 0      | 0      | 0      | 0      | 0      | 0      | 0      | 0      | 0      | 0      | 0      | 0      | 0      | 0      | 0      |
| Methanospirillum    | 1              | 6              | 0      | 0      | 0      | 0      | 0      | 0      | 0      | 0      | 0      | 0      | 0      | 0      | 0      | 0      | 0      | 0      | 0      | 0      |
| Methanothermobacter | 1              | 6              | 0      | 0      | 0      | 0      | 0      | 0      | 0      | 0      | 0      | 0      | 0      | 0      | 0      | 0      | 0      | 0      | 0      | 0      |
| Methanothermococcus | 1              | 5              | 0      | 0      | 0      | 0      | 0      | 0      | 0      | 0      | 0      | 0      | 0      | 0      | 0      | 0      | 0      | 0      | 0      | 0      |
| Methanothermus      | 1              | 5              | 0      | 0      | 0      | 0      | 0      | 0      | 0      | 0      | 0      | 0      | 0      | 0      | 0      | 0      | 0      | 0      | 0      | 0      |
| Methanotorris       | 1              | 5              | 0      | 0      | 0      | 0      | 0      | 0      | 0      | 0      | 0      | 0      | 0      | 0      | 0      | 0      | 0      | 0      | 0      | 0      |
| Methylacidiphilum   | 2              | 48             | 0      | 0      | 0      | 0      | 0      | 0      | 0      | 0      | 0      | 0      | 0      | 1      | 0      | 0      | 0      | 0      | 0      | 0      |
| Methylarcula        | 1              | 2              | 0      | 0      | 0      | 0      | 0      | 0      | 0      | 0      | 0      | 0      | 0      | 0      | 0      | 0      | 0      | 0      | 0      | 0      |
| Methylibium         | 1              | 38             | 0      | 0      | 0      | 0      | 0      | 0      | 0      | 0      | 0      | 0      | 0      | 1      | 0      | 0      | 0      | 0      | 0      | 0      |
| Methylobacillus     | 2              | 61             | 0      | 0      | 0      | 0      | 0      | 1      | 0      | 0      | 0      | 0      | 0      | 0      | 0      | 0      | 0      | 0      | 0      | 0      |
| Methylobacterium    | 3              | 236            | 0      | 0      | 0      | 0      | 0      | 0      | 1      | 0      | 1      | 0      | 0      | 0      | 0      | 0      | 0      | 0      | 0      | 0      |
| Methylocella        | 3              | 117            | 0      | 0      | 0      | 0      | 0      | 0      | 0      | 0      | 0      | 0      | 0      | 1      | 0      | 0      | 0      | 0      | 0      | 0      |
| Methylococcus       | 2              | 80             | 0      | 0      | 0      | 0      | 0      | 0      | 0      | 0      | 0      | 0      | 0      | 1      | 0      | 0      | 0      | 0      | 0      | 0      |
| Methylocystis       | 1              | 21             | 0      | 0      | 0      | 0      | 0      | 0      | 0      | 0      | 0      | 0      | 0      | 1      | 0      | 0      | 0      | 0      | 0      | 0      |
| Methyloferula       | 1              | 2              | 0      | 0      | 0      | 0      | 0      | 0      | 0      | 0      | 0      | 0      | 0      | 0      | 0      | 0      | 0      | 0      | 0      | 0      |
| Methylomicrobium    | 1              | 12             | 0      | 0      | 0      | 0      | 0      | 0      | 0      | 0      | 0      | 0      | 0      | 1      | 0      | 0      | 0      | 0      | 0      | 0      |
| Methylomonas        | 1              | 15             | 0      | 0      | 0      | 0      | 0      | 0      | 0      | 0      | 0      | 0      | 0      | 1      | 0      | 0      | 0      | 0      | 0      | 0      |
| Methylophaga        | 1              | 7              | 0      | 0      | 0      | 0      | 0      | 0      | 0      | 0      | 0      | 0      | 0      | 0      | 0      | 0      | 0      | 0      | 0      | 0      |
| Methylophilus       | 1              | 2              | 0      | 0      | 0      | 0      | 0      | 0      | 0      | 0      | 0      | 0      | 0      | 0      | 0      | 0      | 0      | 0      | 0      | 0      |
| Methylosinus        | 1              | 2              | 0      | 0      | 0      | 0      | 0      | 0      | 0      | 0      | 0      | 0      | 0      | 0      | 0      | 0      | 0      | 0      | 0      | 0      |
| Methylotenera       | 2              | 72             | 0      | 0      | 0      | 0      | 0      | 0      | 0      | 0      | 0      | 0      | 0      | 0      | 0      | 0      | 0      | 0      | 0      | 0      |
| Methyloversatilis   | 1              | 5              | 0      | 0      | 0      | 0      | 0      | 0      | 0      | 0      | 0      | 0      | 0      | 1      | 0      | 0      | 0      | 0      | 0      | 0      |
| Methylovorus        | 2              | 66             | 0      | 0      | 0      | 0      | 0      | 0      | 0      | 0      | 0      | 0      | 0      | 0      | 0      | 0      | 0      | 0      | 0      | 0      |
| Micavibrio          | 1              | 9              | 0      | 0      | 0      | 0      | 0      | 0      | 0      | 0      | 0      | 0      | 0      | 0      | 0      | 0      | 0      | 0      | 0      | 0      |
| Microbacterium      | 2              | 115            | 0      | 0      | 0      | 0      | 0      | 0      | 0      | 0      | 0      | 0      | 0      | 0      | 0      | 0      | 0      | 0      | 0      | 0      |
| Microchaete         | 1              | 23             | 0      | 0      | 0      | 0      | 0      | 0      | 0      | 0      | 0      | 0      | 0      | 1      | 0      | 0      | 0      | 0      | 0      | 0      |
| Micrococcus         | 2              | 72             | 0      | 0      | 0      | 0      | 0      | 0      | 0      | 0      | 0      | 0      | 0      | 0      | 0      | 0      | 0      | 0      | 0      | 0      |
| Microcoleus         | 1              | 17             | 0      | 0      | 0      | 0      | 0      | 0      | 0      | 0      | 0      | 0      | 0      | 0      | 0      | 0      | 0      | 0      | 0      | 0      |
| Microcystis         | 2              | 67             | 0      | 0      | 0      | 0      | 0      | 0      | 0      | 0      | 0      | 0      | 0      | 0      | 0      | 0      | 0      | 0      | 0      | 0      |
| Microlunatus        | 1              | 25             | 0      | 0      | 0      | 0      | 0      | 0      | 0      | 0      | 0      | 0      | 0      | 0      | 0      | 0      | 0      | 0      | 0      | 0      |
| Micromonospora      | 2              | 115            | 0      | 0      | 0      | 0      | 0      | 0      | 0      | 0      | 0      | 0      | 0      | 0      | 0      | 0      | 0      | 0      | 0      | 0      |
| Microvirga          | 1              | 6              | 0      | 0      | 0      | 0      | 0      | 0      | 0      | 0      | 0      | 0      | 0      | 0      | 0      | 0      | 0      | 0      | 0      | 0      |
| Mobiluncus          | 1              | 41             | 0      | 0      | 0      | 0      | 0      | 0      | 0      | 0      | 0      | 0      | 0      | 1      | 0      | 0      | 0      | 0      | 0      | 0      |
| Modestobacter       | 1              | 43             | 0      | 0      | 0      | 0      | 0      | 0      | 0      | 0      | 0      | 0      | 0      | 0      | 1      | 0      | 0      | 0      | 0      | 0      |
| Moorea              | 1              | 2              | 0      | 0      | 0      | 0      | 0      | 0      | 0      | 0      | 0      | 0      | 0      | 0      | 0      | 0      | 0      | 0      | 0      | 0      |
| Moorella            | 2              | 69             | 0      | 0      | 0      | 0      | 0      | 0      | 0      | 0      | 0      | 0      | 0      | 0      | 0      | 0      | 0      | 1      | 0      | 0      |
| Moraxella           | 2              | 66             | 0      | 0      | 0      | 0      | 0      | 0      | 0      | 0      | 0      | 0      | 0      | 0      | 0      | 0      | 0      | 0      | 0      | 0      |
| Morganella          | 1              | 29             | 0      | 0      | 0      | 0      | 0      | 0      | 0      | 0      | 0      | 0      | 0      | 1      | 0      | 0      | 0      | 0      | 0      | 0      |
| Moritella           | 1              | 2              | 0      | 0      | 0      | 0      | 0      | 0      | 0      | 0      | 0      | 0      | 0      | 0      | 0      | 0      | 0      | 0      | 0      | 0      |
| Muricauda           | 1              | 23             | 0      | 0      | 0      | 0      | 0      | 0      | 0      | 0      | 0      | 0      | 0      | 0      | 0      | 0      | 0      | 0      | 0      | 0      |
| Mycobacterium       | 3              | 306            | 0      | 1      | 0      | 0      | 0      | 0      | 1      | 0      | 0      | 1      | 0      | 1      | 1      | 1      | 0      | 1      | 0      | 0      |
| Mycoplasma          | 1              | 53             | 0      | 0      | 0      | 0      | 0      | 0      | 0      | 0      | 0      | 0      | 0      | 0      | 0      | 0      | 0      | 0      | 0      | 0      |
| Myxococcus          | 2              | 110            | 0      | 1      | 0      | 0      | 0      | 0      | 0      | 0      | 0      | 1      | 0      | 0      | 0      | 0      | 0      | 0      | 0      | 0      |
| Nakamurella         | 2              | 115            | 0      | 1      | 1      | 0      | 0      | 0      | 0      | 0      | 0      | 0      | 0      | 0      | 0      | 0      | 0      | 1      | 0      | 0      |
| napthalene          | 1              | 2              | 0      | 0      | 0      | 0      | 0      | 0      | 0      | 0      | 0      | 0      | 0      | 0      | 0      | 0      | 0      | 0      | 0      | 0      |
| Natranaerobius      | 2              | 55             | 0      | 0      | 0      | 0      | 0      | 0      | 0      | 0      | 0      | 0      | 0      | 0      | 0      | 0      | 0      | 0      | 0      | 0      |
| Natrialba           | 1              | 16             | 0      | 0      | 0      | 0      | 0      | 0      | 0      | 0      | 0      | 0      | 0      | 0      | 0      | 0      | 0      | 0      | 0      | 0      |
| Natrinema           | 1              | 16             | 0      | 0      | 0      | 0      | 0      | 0      | 0      | 0      | 0      | 0      | 0      | 0      | 0      | 0      | 0      | 0      | 0      | 0      |
| Natronobacterium    | 1              | 11             | 0      | 0      | 0      | 0      | 0      | 0      | 0      | 0      | 0      | 0      | 0      | 1      | 0      | 0      | 0      | 0      | 0      | 0      |
| Natronococcus       | 1              | 21             | 0      | 0      | 0      | 0      | 0      | 0      | 0      | 0      | 0      | 0      | 0      | 0      | 0      | 0      | 0      | 0      | 0      | 0      |



| Genus             | Cluster Number | Protein Counts | K04112 | K04116 | K04117 | K04118 | K05296 | K05394 | K05549 | K05599 | K05783 | K05898 | K05913 | K06281 | K06446 | K06912 | K07408 | K07535 | K07536 | K07537 |
|-------------------|----------------|----------------|--------|--------|--------|--------|--------|--------|--------|--------|--------|--------|--------|--------|--------|--------|--------|--------|--------|--------|
| Natronomonas      | 1              | 20             | 0      | 0      | 0      | 0      | 0      | 0      | 0      | 0      | 0      | 0      | 0      | 0      | 0      | 0      | 0      | 0      | 0      | 0      |
| Nautilia          | 2              | 48             | 0      | 0      | 0      | 0      | 0      | 0      | 0      | 0      | 0      | 0      | 0      | 0      | 0      | 0      | 0      | 0      | 0      | 0      |
| Neisseria         | 2              | 67             | 0      | 0      | 0      | 0      | 0      | 0      | 0      | 0      | 0      | 0      | 0      | 0      | 0      | 0      | 0      | 0      | 0      | 0      |
| Neisseriaceae     | 1              | 1              | 0      | 0      | 0      | 0      | 0      | 0      | 0      | 0      | 0      | 0      | 0      | 0      | 0      | 0      | 0      | 0      | 0      | 0      |
| Neorickettsia     | 1              | 31             | 0      | 0      | 0      | 0      | 0      | 0      | 0      | 0      | 0      | 0      | 0      | 0      | 0      | 0      | 0      | 0      | 0      | 0      |
| Neptuniibacter    | 1              | 2              | 0      | 0      | 0      | 0      | 0      | 0      | 0      | 0      | 0      | 0      | 0      | 0      | 0      | 0      | 0      | 0      | 0      | 0      |
| Niastella         | 1              | 21             | 0      | 0      | 0      | 0      | 0      | 0      | 0      | 0      | 0      | 0      | 0      | 1      | 0      | 0      | 0      | 0      | 0      | 0      |
| Nitratifractor    | 2              | 54             | 0      | 0      | 0      | 0      | 0      | 0      | 0      | 0      | 0      | 0      | 0      | 0      | 0      | 0      | 0      | 0      | 0      | 0      |
| Nitratireductor   | 1              | 19             | 0      | 0      | 0      | 0      | 0      | 0      | 0      | 0      | 0      | 0      | 0      | 0      | 0      | 0      | 0      | 0      | 0      | 0      |
| Nitratiruptor     | 2              | 40             | 0      | 0      | 0      | 0      | 0      | 0      | 0      | 0      | 0      | 0      | 0      | 0      | 0      | 0      | 0      | 0      | 0      | 0      |
| Nitrobacter       | 2              | 99             | 0      | 0      | 0      | 0      | 0      | 0      | 0      | 0      | 0      | 0      | 0      | 0      | 0      | 0      | 0      | 0      | 0      | 0      |
| Nitrococcus       | 1              | 2              | 0      | 0      | 0      | 0      | 0      | 0      | 0      | 0      | 0      | 0      | 0      | 0      | 0      | 0      | 0      | 0      | 0      | 0      |
| Nitrosococcus     | 2              | 94             | 0      | 0      | 0      | 0      | 0      | 0      | 0      | 0      | 0      | 0      | 0      | 0      | 0      | 0      | 0      | 0      | 0      | 0      |
| Nitrosomonas      | 2              | 72             | 0      | 0      | 0      | 0      | 0      | 0      | 0      | 0      | 0      | 0      | 0      | 0      | 0      | 0      | 0      | 0      | 0      | 0      |
| Nitrosopumilaceae | 1              | 7              | 0      | 0      | 0      | 0      | 0      | 0      | 0      | 0      | 0      | 0      | 0      | 0      | 0      | 0      | 0      | 0      | 0      | 0      |
| Nitrosopumilus    | 1              | 11             | 0      | 0      | 0      | 0      | 0      | 0      | 0      | 0      | 0      | 0      | 0      | 0      | 0      | 0      | 0      | 0      | 0      | 0      |
| Nitrospira        | 2              | 74             | 0      | 0      | 0      | 0      | 0      | 0      | 0      | 0      | 0      | 0      | 0      | 0      | 0      | 0      | 0      | 0      | 0      | 0      |
| Nocardia          | 2              | 185            | 0      | 0      | 0      | 0      | 0      | 0      | 0      | 0      | 0      | 1      | 0      | 0      | 0      | 0      | 0      | 0      | 0      | 0      |
| Nocardioidaceae   | 1              | 2              | 0      | 0      | 0      | 0      | 0      | 0      | 0      | 0      | 0      | 0      | 0      | 0      | 0      | 0      | 0      | 0      | 0      | 0      |
| Nocardioides      | 2              | 157            | 0      | 1      | 1      | 0      | 0      | 0      | 0      | 0      | 0      | 1      | 0      | 0      | 0      | 0      | 0      | 1      | 0      | 0      |
| Nocardiopsis      | 2              | 102            | 0      | 0      | 0      | 0      | 0      | 0      | 0      | 0      | 0      | 0      | 0      | 0      | 0      | 0      | 0      | 0      | 0      | 0      |
| Nodularia         | 1              | 22             | 0      | 0      | 0      | 0      | 0      | 0      | 0      | 0      | 0      | 0      | 0      | 1      | 0      | 0      | 0      | 0      | 0      | 0      |
| Nonlabens         | 1              | 19             | 0      | 0      | 0      | 0      | 0      | 0      | 0      | 0      | 0      | 0      | 0      | 0      | 0      | 0      | 0      | 0      | 0      | 0      |
| Nostoc            | 2              | 111            | 0      | 0      | 0      | 0      | 0      | 0      | 0      | 0      | 0      | 0      | 0      | 1      | 0      | 0      | 0      | 0      | 0      | 0      |
| Nostocaceae       | 1              | 2              | 0      | 0      | 0      | 0      | 0      | 0      | 0      | 0      | 0      | 0      | 0      | 0      | 0      | 0      | 0      | 0      | 0      | 0      |
| Novosphingobium   | 2              | 169            | 0      | 0      | 0      | 0      | 0      | 0      | 1      | 0      | 1      | 1      | 0      | 0      | 1      | 0      | 0      | 0      | 1      | 0      |
| Oceanibaculum     | 1              | 3              | 0      | 0      | 0      | 0      | 0      | 0      | 0      | 0      | 0      | 0      | 0      | 0      | 0      | 0      | 0      | 0      | 0      | 0      |
| Oceanibulbus      | 1              | 12             | 0      | 0      | 0      | 0      | 0      | 0      | 0      | 0      | 0      | 0      | 0      | 0      | 0      | 0      | 0      | 0      | 0      | 0      |
| Oceanicola        | 1              | 9              | 0      | 0      | 0      | 0      | 0      | 0      | 0      | 0      | 0      | 0      | 0      | 0      | 0      | 0      | 0      | 0      | 0      | 0      |
| Oceanimonas       | 1              | 33             | 0      | 0      | 0      | 0      | 0      | 0      | 1      | 0      | 1      | 0      | 0      | 0      | 0      | 0      | 0      | 0      | 0      | 0      |
| Oceaniovalibus    | 1              | 2              | 0      | 0      | 0      | 0      | 0      | 0      | 0      | 0      | 0      | 0      | 0      | 0      | 0      | 0      | 0      | 0      | 0      | 0      |
| Oceanithermus     | 2              | 72             | 0      | 0      | 0      | 0      | 0      | 0      | 0      | 0      | 0      | 0      | 0      | 0      | 0      | 0      | 0      | 0      | 0      | 0      |
| Oceanobacillus    | 2              | 91             | 0      | 0      | 0      | 0      | 0      | 0      | 0      | 0      | 0      | 0      | 0      | 0      | 1      | 0      | 0      | 0      | 0      | 0      |
| Oceanospirillum   | 1              | 2              | 0      | 0      | 0      | 0      | 0      | 0      | 0      | 0      | 0      | 0      | 0      | 0      | 0      | 0      | 0      | 0      | 0      | 0      |
| Ochrobactrum      | 2              | 133            | 0      | 0      | 0      | 0      | 0      | 0      | 0      | 0      | 0      | 0      | 0      | 0      | 0      | 0      | 0      | 0      | 0      | 0      |
| Octadecabacter    | 1              | 29             | 0      | 0      | 0      | 0      | 0      | 0      | 0      | 0      | 0      | 0      | 0      | 0      | 0      | 0      | 0      | 0      | 0      | 0      |
| Oenococcus        | 2              | 41             | 0      | 0      | 0      | 0      | 0      | 0      | 0      | 0      | 0      | 0      | 0      | 0      | 0      | 0      | 0      | 0      | 0      | 0      |
| Oleomonas         | 1              | 2              | 0      | 0      | 0      | 0      | 0      | 0      | 0      | 0      | 0      | 0      | 0      | 0      | 0      | 0      | 0      | 0      | 0      | 0      |
| Oligotropha       | 3              | 87             | 0      | 0      | 0      | 0      | 0      | 0      | 0      | 0      | 0      | 0      | 0      | 1      | 0      | 0      | 0      | 0      | 0      | 0      |
| Olsenella         | 2              | 40             | 0      | 0      | 0      | 0      | 0      | 0      | 0      | 0      | 0      | 0      | 0      | 0      | 0      | 0      | 0      | 0      | 0      | 0      |
| Opitutus          | 2              | 67             | 0      | 0      | 0      | 0      | 0      | 0      | 0      | 0      | 0      | 0      | 0      | 0      | 0      | 0      | 0      | 0      | 0      | 0      |
| Orientia          | 1              | 21             | 0      | 0      | 0      | 0      | 0      | 0      | 0      | 0      | 0      | 0      | 0      | 0      | 0      | 0      | 0      | 0      | 0      | 0      |
| Ornithobacterium  | 1              | 11             | 0      | 0      | 0      | 0      | 0      | 0      | 0      | 0      | 0      | 0      | 0      | 0      | 0      | 0      | 0      | 0      | 0      | 0      |
| Oscillatoria      | 1              | 16             | 0      | 0      | 0      | 0      | 0      | 0      | 0      | 0      | 0      | 0      | 0      | 0      | 0      | 0      | 0      | 0      | 0      | 0      |
| Oscillatoriales   | 1              | 2              | 0      | 0      | 0      | 0      | 0      | 0      | 0      | 0      | 0      | 0      | 0      | 0      | 0      | 0      | 0      | 0      | 0      | 0      |
| Oscillibacter     | 1              | 20             | 0      | 0      | 0      | 0      | 0      | 0      | 0      | 0      | 0      | 0      | 0      | 1      | 0      | 0      | 0      | 0      | 0      | 0      |
| Owenweeksia       | 1              | 15             | 0      | 0      | 0      | 0      | 0      | 0      | 0      | 0      | 0      | 0      | 0      | 0      | 0      | 0      | 0      | 0      | 0      | 0      |
| Oxalobacteraceae  | 1              | 4              | 0      | 0      | 0      | 0      | 0      | 0      | 0      | 0      | 0      | 0      | 0      | 0      | 0      | 0      | 0      | 0      | 0      | 0      |
| Paenibacillus     | 2              | 152            | 0      | 0      | 0      | 0      | 0      | 0      | 0      | 0      | 0      | 0      | 0      | 0      | 0      | 0      | 0      | 0      | 0      | 0      |
| Paludibacter      | 2              | 67             | 0      | 0      | 0      | 0      | 0      | 0      | 0      | 0      | 0      | 0      | 0      | 0      | 0      | 0      | 0      | 0      | 0      | 0      |
| Pandoraea         | 1              | 18             | 0      | 0      | 0      | 0      | 0      | 0      | 0      | 0      | 0      | 0      | 0      | 0      | 0      | 0      | 0      | 0      | 1      | 0      |
| Pannonibacter     | 1              | 3              | 0      | 0      | 0      | 0      | 0      | 0      | 0      | 0      | 0      | 0      | 0      | 0      | 0      | 0      | 0      | 0      | 0      | 0      |

| Genus              | Cluster Number | Protein Counts | K04112 | K04116 | K04117 | K04118 | K05296 | K05394 | K05549 | K05599 | K05783 | K05898 | K05913 | K06281 | K06446 | K06912 | K07408 | K07535 | K07536 | K07537 |
|--------------------|----------------|----------------|--------|--------|--------|--------|--------|--------|--------|--------|--------|--------|--------|--------|--------|--------|--------|--------|--------|--------|
| Pantholops         | 1              | 23             | 0      | 0      | 0      | 0      | 0      | 0      | 0      | 0      | 0      | 0      | 0      | 0      | 1      | 0      | 0      | 0      | 0      | 0      |
| Pantoea            | 2              | 181            | 0      | 0      | 0      | 0      | 0      | 0      | 0      | 0      | 0      | 0      | 0      | 0      | 0      | 0      | 0      | 0      | 0      | 0      |
| Parabacteroides    | 2              | 64             | 0      | 0      | 0      | 0      | 0      | 0      | 0      | 0      | 0      | 0      | 0      | 1      | 0      | 0      | 0      | 0      | 0      | 0      |
| Parachlamydia      | 1              | 11             | 0      | 0      | 0      | 0      | 0      | 0      | 0      | 0      | 0      | 0      | 0      | 0      | 0      | 0      | 0      | 0      | 0      | 0      |
| Paracoccus         | 2              | 169            | 0      | 0      | 0      | 0      | 0      | 0      | 1      | 0      | 1      | 0      | 0      | 1      | 1      | 0      | 0      | 0      | 0      | 0      |
| Parvibaculum       | 3              | 117            | 0      | 1      | 1      | 0      | 0      | 0      | 1      | 0      | 0      | 1      | 0      | 0      | 1      | 0      | 0      | 1      | 1      | 0      |
| Parvularcula       | 2              | 72             | 0      | 0      | 0      | 0      | 0      | 0      | 0      | 0      | 0      | 0      | 0      | 0      | 0      | 0      | 0      | 0      | 0      | 0      |
| Pasteurella        | 2              | 85             | 0      | 0      | 0      | 0      | 0      | 0      | 0      | 0      | 0      | 0      | 0      | 0      | 0      | 0      | 0      | 0      | 0      | 0      |
| Pasteurellaceae    | 1              | 2              | 0      | 0      | 0      | 0      | 0      | 0      | 0      | 0      | 0      | 0      | 0      | 0      | 0      | 0      | 0      | 0      | 0      | 0      |
| Pectobacterium     | 1              | 44             | 0      | 0      | 0      | 0      | 0      | 0      | 0      | 0      | 0      | 0      | 0      | 1      | 0      | 0      | 0      | 0      | 0      | 0      |
| Pediococcus        | 1              | 43             | 0      | 0      | 0      | 0      | 0      | 0      | 0      | 0      | 0      | 0      | 0      | 0      | 0      | 0      | 0      | 0      | 0      | 0      |
| Pedobacter         | 2              | 88             | 0      | 0      | 0      | 0      | 0      | 0      | 0      | 0      | 0      | 0      | 0      | 0      | 0      | 0      | 0      | 0      | 0      | 0      |
| Pelagibaca         | 1              | 10             | 0      | 0      | 0      | 0      | 0      | 0      | 0      | 0      | 0      | 0      | 0      | 0      | 0      | 0      | 0      | 0      | 0      | 0      |
| Pelagibacterium    | 1              | 39             | 0      | 0      | 0      | 0      | 0      | 0      | 0      | 0      | 0      | 0      | 0      | 0      | 0      | 0      | 0      | 0      | 0      | 0      |
| Pelobacter         | 2              | 85             | 0      | 0      | 0      | 0      | 0      | 0      | 0      | 0      | 0      | 0      | 0      | 0      | 0      | 0      | 0      | 0      | 0      | 0      |
| Pelodictyon        | 2              | 62             | 0      | 0      | 0      | 0      | 0      | 0      | 0      | 0      | 0      | 0      | 0      | 1      | 0      | 0      | 0      | 0      | 0      | 0      |
| Pelosinus          | 1              | 1              | 0      | 0      | 0      | 0      | 0      | 0      | 0      | 0      | 0      | 0      | 0      | 0      | 0      | 0      | 0      | 0      | 0      | 0      |
| Pelotomaculum      | 2              | 60             | 0      | 0      | 0      | 0      | 0      | 0      | 0      | 0      | 0      | 0      | 0      | 0      | 0      | 0      | 0      | 0      | 0      | 0      |
| Peptostreptococcus | 1              | 1              | 0      | 0      | 0      | 0      | 0      | 0      | 0      | 0      | 0      | 0      | 0      | 0      | 0      | 0      | 0      | 0      | 0      | 0      |
| Persephonella      | 2              | 55             | 0      | 0      | 0      | 0      | 0      | 0      | 0      | 0      | 0      | 0      | 0      | 0      | 0      | 0      | 0      | 0      | 0      | 0      |
| Petrotoga          | 2              | 72             | 0      | 0      | 0      | 0      | 0      | 0      | 0      | 0      | 0      | 0      | 0      | 0      | 0      | 0      | 0      | 0      | 0      | 0      |
| Phaeobacter        | 2              | 55             | 0      | 0      | 0      | 0      | 0      | 0      | 0      | 0      | 0      | 0      | 0      | 0      | 0      | 0      | 0      | 0      | 0      | 0      |
| Phenylobacterium   | 3              | 103            | 0      | 0      | 0      | 0      | 0      | 0      | 0      | 0      | 0      | 0      | 0      | 0      | 1      | 0      | 0      | 0      | 0      | 0      |
| Photobacterium     | 2              | 119            | 0      | 0      | 0      | 0      | 0      | 0      | 0      | 0      | 0      | 0      | 0      | 0      | 0      | 0      | 0      | 0      | 0      | 0      |
| Photorhabdus       | 2              | 149            | 0      | 0      | 0      | 0      | 0      | 0      | 1      | 0      | 0      | 0      | 0      | 0      | 0      | 0      | 0      | 0      | 0      | 0      |
| Phycisphaera       | 1              | 9              | 0      | 0      | 0      | 0      | 0      | 0      | 0      | 0      | 0      | 0      | 0      | 0      | 0      | 0      | 0      | 0      | 0      | 0      |
| Phyllobacterium    | 1              | 6              | 0      | 0      | 0      | 0      | 0      | 0      | 0      | 0      | 0      | 0      | 0      | 0      | 0      | 0      | 0      | 0      | 0      | 0      |
| Picrophilus        | 1              | 15             | 0      | 0      | 0      | 0      | 0      | 0      | 0      | 0      | 0      | 0      | 0      | 0      | 0      | 0      | 0      | 0      | 0      | 0      |
| Pirellula          | 2              | 85             | 0      | 0      | 0      | 0      | 0      | 0      | 0      | 0      | 0      | 0      | 0      | 0      | 0      | 0      | 0      | 0      | 0      | 0      |
| Planctomyces       | 2              | 93             | 0      | 0      | 0      | 0      | 0      | 0      | 0      | 0      | 0      | 0      | 0      | 0      | 0      | 0      | 0      | 0      | 0      | 0      |
| Plautia            | 1              | 17             | 0      | 0      | 0      | 0      | 0      | 0      | 0      | 0      | 0      | 0      | 0      | 0      | 0      | 0      | 0      | 0      | 0      | 0      |
| Plesiomonas        | 1              | 4              | 0      | 0      | 0      | 0      | 0      | 0      | 0      | 0      | 0      | 0      | 0      | 0      | 0      | 0      | 0      | 0      | 0      | 0      |
| Pleurocapsa        | 1              | 23             | 0      | 0      | 0      | 0      | 0      | 0      | 0      | 0      | 0      | 0      | 0      | 0      | 0      | 0      | 0      | 0      | 0      | 0      |
| Polaribacter       | 2              | 74             | 0      | 0      | 0      | 0      | 0      | 0      | 0      | 0      | 0      | 0      | 0      | 0      | 0      | 0      | 0      | 0      | 0      | 0      |
| Polaromonas        | 3              | 238            | 0      | 1      | 1      | 0      | 0      | 0      | 1      | 0      | 1      | 0      | 0      | 1      | 1      | 0      | 0      | 1      | 1      | 0      |
| Polymorphum        | 3              | 173            | 0      | 1      | 1      | 0      | 0      | 0      | 0      | 0      | 0      | 0      | 0      | 0      | 1      | 0      | 0      | 1      | 1      | 0      |
| Polynucleobacter   | 1              | 19             | 0      | 0      | 0      | 0      | 0      | 0      | 0      | 0      | 0      | 0      | 0      | 0      | 0      | 0      | 0      | 0      | 0      | 0      |
| Ponticaulis        | 1              | 1              | 0      | 0      | 0      | 0      | 0      | 0      | 0      | 0      | 0      | 0      | 0      | 0      | 0      | 0      | 0      | 0      | 0      | 0      |
| Porphyromonas      | 2              | 63             | 0      | 0      | 0      | 0      | 0      | 0      | 0      | 0      | 0      | 0      | 0      | 0      | 0      | 0      | 0      | 0      | 0      | 0      |
| Prevotella         | 1              | 65             | 0      | 0      | 0      | 0      | 0      | 0      | 0      | 0      | 0      | 0      | 0      | 0      | 0      | 0      | 0      | 0      | 0      | 0      |
| Prochlorococcus    | 2              | 68             | 0      | 0      | 0      | 0      | 0      | 0      | 0      | 0      | 0      | 0      | 0      | 0      | 0      | 0      | 0      | 0      | 0      | 0      |
| Propionibacterium  | 1              | 62             | 0      | 0      | 0      | 0      | 0      | 0      | 0      | 0      | 0      | 0      | 0      | 0      | 0      | 0      | 0      | 0      | 0      | 0      |
| Prosthecochloris   | 1              | 16             | 0      | 0      | 0      | 0      | 0      | 0      | 0      | 0      | 0      | 0      | 0      | 1      | 0      | 0      | 0      | 0      | 0      | 0      |
| Proteobacteria     | 1              | 19             | 0      | 0      | 0      | 0      | 0      | 0      | 0      | 0      | 0      | 0      | 0      | 0      | 0      | 0      | 0      | 0      | 0      | 0      |
| Proteus            | 2              | 113            | 0      | 0      | 0      | 0      | 0      | 0      | 0      | 0      | 0      | 0      | 0      | 1      | 0      | 0      | 0      | 0      | 0      | 0      |
| Providencia        | 1              | 38             | 0      | 0      | 0      | 0      | 0      | 0      | 0      | 0      | 0      | 0      | 0      | 0      | 0      | 0      | 0      | 0      | 0      | 0      |
| Pseudaminobacter   | 1              | 10             | 0      | 0      | 0      | 0      | 0      | 0      | 0      | 0      | 0      | 0      | 0      | 0      | 0      | 0      | 0      | 0      | 0      | 0      |
| Pseudanabaena      | 1              | 11             | 0      | 0      | 0      | 0      | 0      | 0      | 0      | 0      | 0      | 0      | 0      | 0      | 0      | 0      | 0      | 0      | 0      | 0      |
| Pseudoalteromonas  | 2              | 188            | 0      | 0      | 0      | 0      | 0      | 0      | 0      | 0      | 0      | 1      | 0      | 0      | 0      | 0      | 0      | 0      | 0      | 0      |
| Pseudochrobactrum  | 1              | 7              | 0      | 0      | 0      | 0      | 0      | 0      | 0      | 0      | 0      | 0      | 0      | 0      | 0      | 0      | 0      | 0      | 0      | 0      |
| Pseudogulbenkiania | 1              | 40             | 0      | 0      | 0      | 0      | 0      | 0      | 1      | 1      | 1      | 0      | 0      | 0      | 0      | 0      | 0      | 0      | 0      | 0      |
| pseudomallei       | 3              | 131            | 0      | 0      | 0      | 0      | 0      | 0      | 0      | 0      | 0      | 0      | 1      | 0      | 0      | 0      | 0      | 0      | 0      | 0      |

| Genus                   | Cluster Number | Protein Counts | K04112 | K04116 | K04117 | K04118 | K05296 | K05394 | K05549 | K05599 | K05783 | K05898 | K05913 | K06281 | K06446 | K06912 | K07408 | K07535 | K07536 | K07537 |
|-------------------------|----------------|----------------|--------|--------|--------|--------|--------|--------|--------|--------|--------|--------|--------|--------|--------|--------|--------|--------|--------|--------|
| Pseudomonas             | 3              | 381            | 0      | 0      | 0      | 0      | 0      | 0      | 1      | 1      | 1      | 1      | 1      | 0      | 1      | 1      | 0      | 0      | 0      | 0      |
| Pseudonocardia          | 3              | 180            | 0      | 1      | 1      | 0      | 0      | 0      | 1      | 0      | 0      | 0      | 0      | 1      | 1      | 0      | 0      | 1      | 0      | 0      |
| Pseudorhodobacter       | 1              | 4              | 0      | 0      | 0      | 0      | 0      | 0      | 0      | 0      | 0      | 0      | 0      | 0      | 0      | 0      | 0      | 0      | 0      | 0      |
| Pseudovibrio            | 1              | 33             | 0      | 0      | 0      | 0      | 0      | 0      | 0      | 0      | 0      | 0      | 0      | 0      | 0      | 0      | 0      | 0      | 0      | 0      |
| Pseudoxanthomonas       | 2              | 124            | 0      | 0      | 0      | 0      | 0      | 0      | 1      | 0      | 1      | 0      | 0      | 0      | 0      | 0      | 0      | 0      | 0      | 0      |
| Psychrobacter           | 2              | 124            | 0      | 0      | 0      | 0      | 0      | 0      | 1      | 0      | 1      | 0      | 0      | 0      | 1      | 0      | 0      | 0      | 0      | 0      |
| Psychroflexus           | 1              | 22             | 0      | 0      | 0      | 0      | 0      | 0      | 0      | 0      | 0      | 0      | 0      | 0      | 0      | 0      | 0      | 0      | 0      | 0      |
| Psychromonas            | 2              | 110            | 0      | 0      | 0      | 0      | 0      | 0      | 0      | 0      | 0      | 0      | 0      | 0      | 0      | 0      | 0      | 0      | 0      | 0      |
| Pusillimonas            | 3              | 111            | 0      | 0      | 0      | 0      | 0      | 0      | 0      | 0      | 0      | 0      | 0      | 0      | 1      | 0      | 0      | 0      | 0      | 0      |
| Pyrobaculum             | 1              | 15             | 0      | 0      | 0      | 0      | 0      | 0      | 0      | 0      | 0      | 0      | 0      | 1      | 0      | 0      | 0      | 0      | 0      | 0      |
| Pyrococcus              | 1              | 10             | 0      | 0      | 0      | 0      | 0      | 0      | 0      | 0      | 0      | 0      | 0      | 0      | 0      | 0      | 0      | 0      | 0      | 0      |
| Pyrolobus               | 1              | 4              | 0      | 0      | 0      | 0      | 0      | 0      | 0      | 0      | 0      | 0      | 0      | 1      | 0      | 0      | 0      | 0      | 0      | 0      |
| Rahnella                | 2              | 143            | 0      | 0      | 0      | 0      | 0      | 0      | 0      | 0      | 0      | 0      | 0      | 0      | 0      | 0      | 0      | 0      | 0      | 0      |
| Ralstonia               | 3              | 332            | 0      | 1      | 1      | 1      | 1      | 0      | 1      | 0      | 1      | 1      | 0      | 0      | 1      | 1      | 0      | 1      | 1      | 0      |
| Ramlibacter             | 1              | 35             | 0      | 0      | 0      | 0      | 0      | 0      | 0      | 0      | 0      | 0      | 0      | 0      | 0      | 0      | 0      | 0      | 0      | 0      |
| Raoultella              | 2              | 139            | 0      | 0      | 0      | 0      | 0      | 0      | 1      | 0      | 1      | 0      | 0      | 0      | 0      | 0      | 0      | 0      | 0      | 0      |
| Raphidiopsis            | 1              | 5              | 0      | 0      | 0      | 0      | 0      | 0      | 0      | 0      | 0      | 0      | 0      | 0      | 0      | 0      | 0      | 0      | 0      | 0      |
| Reinekea                | 1              | 2              | 0      | 0      | 0      | 0      | 0      | 0      | 0      | 0      | 0      | 0      | 0      | 0      | 0      | 0      | 0      | 0      | 0      | 0      |
| Renibacterium           | 2              | 67             | 0      | 0      | 0      | 0      | 0      | 0      | 0      | 0      | 0      | 0      | 0      | 0      | 0      | 0      | 0      | 0      | 0      | 0      |
| Rhizobiaceae            | 1              | 3              | 0      | 0      | 0      | 0      | 0      | 0      | 0      | 0      | 0      | 0      | 0      | 0      | 0      | 0      | 0      | 0      | 0      | 0      |
| Rhizobiales             | 1              | 6              | 0      | 0      | 0      | 0      | 0      | 0      | 0      | 0      | 0      | 0      | 0      | 0      | 0      | 0      | 0      | 0      | 0      | 0      |
| Rhizobium               | 3              | 257            | 0      | 0      | 0      | 0      | 0      | 0      | 0      | 0      | 0      | 0      | 0      | 1      | 0      | 0      | 0      | 0      | 0      | 0      |
| Rhizobium/Agrobacterium | 2              | 87             | 0      | 0      | 0      | 0      | 0      | 0      | 0      | 0      | 0      | 0      | 0      | 0      | 0      | 0      | 0      | 0      | 0      | 0      |
| Rhodanobacter           | 1              | 21             | 0      | 0      | 0      | 0      | 0      | 0      | 0      | 0      | 0      | 0      | 0      | 0      | 0      | 0      | 0      | 0      | 0      | 0      |
| Rhodobacter             | 3              | 175            | 0      | 0      | 0      | 0      | 0      | 0      | 0      | 0      | 0      | 0      | 0      | 1      | 1      | 0      | 0      | 0      | 0      | 0      |
| Rhodobacteraceae        | 1              | 21             | 0      | 0      | 0      | 0      | 0      | 0      | 0      | 0      | 0      | 0      | 0      | 0      | 0      | 0      | 0      | 0      | 0      | 0      |
| Rhodobacterales         | 1              | 34             | 0      | 0      | 0      | 0      | 0      | 0      | 0      | 0      | 0      | 0      | 0      | 0      | 0      | 0      | 0      | 0      | 0      | 0      |
| Rhodococcus             | 2              | 292            | 0      | 1      | 1      | 0      | 0      | 1      | 1      | 0      | 1      | 1      | 0      | 1      | 1      | 0      | 0      | 1      | 0      | 0      |
| Rhodocyclaceae          | 1              | 7              | 0      | 0      | 0      | 0      | 0      | 0      | 0      | 0      | 0      | 0      | 0      | 1      | 0      | 0      | 0      | 0      | 0      | 0      |
| Rhodoferax              | 3              | 144            | 0      | 0      | 0      | 0      | 0      | 0      | 0      | 0      | 0      | 0      | 0      | 1      | 0      | 0      | 0      | 0      | 0      | 0      |
| Rhodomicrobium          | 2              | 103            | 1      | 0      | 0      | 0      | 0      | 0      | 0      | 0      | 0      | 0      | 0      | 1      | 0      | 0      | 0      | 0      | 0      | 1      |
| Rhodopirellula          | 2              | 87             | 0      | 0      | 0      | 0      | 0      | 0      | 0      | 0      | 0      | 0      | 0      | 0      | 0      | 0      | 0      | 0      | 0      | 0      |
| Rhodopseudomonas        | 3              | 246            | 1      | 1      | 1      | 0      | 0      | 0      | 1      | 0      | 0      | 0      | 0      | 1      | 0      | 0      | 0      | 1      | 1      | 0      |
| Rhodospirillum          | 2              | 121            | 0      | 0      | 0      | 0      | 0      | 0      | 0      | 0      | 0      | 0      | 0      | 1      | 0      | 0      | 0      | 0      | 0      | 0      |
| Rhodothermus            | 2              | 76             | 0      | 0      | 0      | 0      | 0      | 0      | 0      | 0      | 0      | 0      | 0      | 0      | 0      | 0      | 0      | 0      | 0      | 0      |
| Rhodovulum              | 1              | 4              | 0      | 0      | 0      | 0      | 0      | 0      | 0      | 0      | 0      | 0      | 0      | 0      | 0      | 0      | 0      | 0      | 0      | 0      |
| Richelia                | 1              | 2              | 0      | 0      | 0      | 0      | 0      | 0      | 0      | 0      | 0      | 0      | 0      | 0      | 0      | 0      | 0      | 0      | 0      | 0      |
| Rickettsia              | 2              | 43             | 0      | 0      | 0      | 0      | 0      | 0      | 0      | 0      | 0      | 0      | 0      | 0      | 0      | 0      | 0      | 0      | 0      | 0      |
| Rickettsiaceae          | 1              | 5              | 0      | 0      | 0      | 0      | 0      | 0      | 0      | 0      | 0      | 0      | 0      | 0      | 0      | 0      | 0      | 0      | 0      | 0      |
| Riemerella              | 2              | 61             | 0      | 0      | 0      | 0      | 0      | 0      | 0      | 0      | 0      | 0      | 0      | 0      | 0      | 0      | 0      | 0      | 0      | 0      |
| Rivularia               | 1              | 18             | 0      | 0      | 0      | 0      | 0      | 0      | 0      | 0      | 0      | 0      | 0      | 1      | 0      | 0      | 0      | 0      | 0      | 0      |
| Robiginitalea           | 2              | 83             | 0      | 0      | 0      | 0      | 0      | 0      | 0      | 0      | 0      | 0      | 0      | 0      | 0      | 0      | 0      | 0      | 0      | 0      |
| Roseburia               | 2              | 58             | 0      | 0      | 0      | 0      | 0      | 0      | 0      | 0      | 0      | 0      | 0      | 0      | 0      | 0      | 0      | 0      | 0      | 0      |
| Roseibium               | 1              | 3              | 0      | 0      | 0      | 0      | 0      | 0      | 0      | 0      | 0      | 0      | 0      | 0      | 0      | 0      | 0      | 0      | 0      | 0      |
| Roseiflexus             | 3              | 100            | 0      | 0      | 0      | 0      | 0      | 0      | 0      | 0      | 0      | 0      | 0      | 1      | 0      | 0      | 0      | 0      | 0      | 0      |
| Roseobacter             | 2              | 149            | 0      | 0      | 0      | 0      | 0      | 0      | 0      | 0      | 0      | 0      | 0      | 0      | 0      | 0      | 0      | 0      | 0      | 0      |
| Roseomonas              | 1              | 2              | 0      | 0      | 0      | 0      | 0      | 0      | 0      | 0      | 0      | 0      | 0      | 0      | 0      | 0      | 0      | 0      | 0      | 0      |
| Roseovarius             | 1              | 15             | 0      | 0      | 0      | 0      | 0      | 0      | 0      | 0      | 0      | 0      | 0      | 0      | 0      | 0      | 0      | 0      | 0      | 0      |
| Rothia                  | 1              | 44             | 0      | 0      | 0      | 0      | 0      | 0      | 0      | 0      | 0      | 0      | 0      | 0      | 0      | 0      | 0      | 0      | 0      | 0      |
| Rubrivivax              | 1              | 24             | 0      | 0      | 0      | 0      | 0      | 0      | 0      | 0      | 0      | 0      | 0      | 1      | 0      | 0      | 0      | 0      | 0      | 0      |
| Rubrobacter             | 3              | 117            | 0      | 0      | 0      | 0      | 0      | 0      | 0      | 0      | 0      | 0      | 0      | 0      | 0      | 0      | 0      | 0      | 0      | 0      |
| Ruegeria                | 2              | 189            | 0      | 0      | 0      | 0      | 0      | 0      | 0      | 0      | 0      | 0      | 0      | 0      | 0      | 1      | 0      | 0      | 0      | 0      |

| Genus             | Cluster Number | Protein Counts | K04112 | K04116 | K04117 | K04118 | K05296 | K05394 | K05549 | K05599 | K05783 | K05898 | K05913 | K06281 | K06446 | K06912 | K07408 | K07535 | K07536 | K07537 |
|-------------------|----------------|----------------|--------|--------|--------|--------|--------|--------|--------|--------|--------|--------|--------|--------|--------|--------|--------|--------|--------|--------|
| Ruminococcaceae   | 1              | 2              | 0      | 0      | 0      | 0      | 0      | 0      | 0      | 0      | 0      | 0      | 0      | 0      | 0      | 0      | 0      | 0      | 0      | 0      |
| Ruminococcus      | 2              | 101            | 0      | 0      | 0      | 0      | 0      | 0      | 0      | 0      | 0      | 0      | 0      | 0      | 0      | 0      | 0      | 0      | 0      | 0      |
| Runella           | 1              | 26             | 0      | 0      | 0      | 0      | 0      | 0      | 0      | 0      | 0      | 0      | 0      | 1      | 0      | 0      | 0      | 0      | 0      | 0      |
| Saccharomonospora | 2              | 132            | 0      | 0      | 0      | 0      | 0      | 0      | 1      | 0      | 0      | 0      | 0      | 1      | 1      | 0      | 0      | 0      | 0      | 0      |
| Saccharophagus    | 2              | 81             | 0      | 0      | 0      | 0      | 0      | 0      | 0      | 0      | 0      | 0      | 0      | 0      | 0      | 0      | 0      | 0      | 0      | 0      |
| Saccharopolyspora | 3              | 194            | 0      | 0      | 0      | 0      | 0      | 0      | 1      | 0      | 0      | 0      | 0      | 1      | 0      | 0      | 0      | 1      | 0      | 0      |
| Saccharothrix     | 1              | 32             | 0      | 0      | 0      | 0      | 0      | 0      | 0      | 0      | 0      | 0      | 0      | 0      | 0      | 0      | 0      | 0      | 0      | 0      |
| Sagittula         | 1              | 10             | 0      | 0      | 0      | 0      | 0      | 0      | 0      | 0      | 0      | 0      | 0      | 0      | 0      | 0      | 0      | 0      | 0      | 0      |
| Salinibacter      | 2              | 77             | 0      | 0      | 0      | 0      | 0      | 0      | 0      | 0      | 0      | 0      | 0      | 0      | 0      | 0      | 0      | 0      | 0      | 0      |
| Salinimonas       | 1              | 1              | 0      | 0      | 0      | 0      | 0      | 0      | 0      | 0      | 0      | 0      | 0      | 0      | 0      | 0      | 0      | 0      | 0      | 0      |
| Salinispora       | 3              | 127            | 0      | 0      | 0      | 0      | 0      | 0      | 0      | 0      | 0      | 1      | 0      | 0      | 0      | 0      | 0      | 0      | 0      | 0      |
| Salinivibrio      | 1              | 2              | 0      | 0      | 0      | 0      | 0      | 0      | 0      | 0      | 0      | 0      | 0      | 0      | 0      | 0      | 0      | 0      | 0      | 0      |
| Salmonella        | 2              | 151            | 0      | 0      | 0      | 0      | 0      | 0      | 0      | 0      | 0      | 0      | 0      | 1      | 0      | 0      | 0      | 0      | 0      | 0      |
| Sanguibacter      | 2              | 73             | 0      | 0      | 0      | 0      | 0      | 0      | 0      | 0      | 0      | 0      | 0      | 0      | 0      | 0      | 0      | 0      | 0      | 0      |
| Saprospira        | 1              | 13             | 0      | 0      | 0      | 0      | 0      | 0      | 0      | 0      | 0      | 0      | 0      | 0      | 0      | 0      | 0      | 0      | 0      | 0      |
| Scardovia         | 1              | 1              | 0      | 0      | 0      | 0      | 0      | 0      | 0      | 0      | 0      | 0      | 0      | 0      | 0      | 0      | 0      | 0      | 0      | 0      |
| Scytonema         | 1              | 10             | 0      | 0      | 0      | 0      | 0      | 0      | 0      | 0      | 0      | 0      | 0      | 0      | 0      | 0      | 0      | 0      | 0      | 0      |
| Sebaldella        | 2              | 69             | 0      | 0      | 0      | 0      | 0      | 0      | 0      | 0      | 0      | 0      | 0      | 0      | 0      | 0      | 0      | 0      | 0      | 0      |
| Segniliparus      | 2              | 85             | 0      | 0      | 0      | 0      | 0      | 0      | 0      | 0      | 0      | 0      | 0      | 0      | 0      | 0      | 0      | 0      | 0      | 0      |
| Selenomonas       | 2              | 57             | 0      | 0      | 0      | 0      | 0      | 0      | 0      | 0      | 0      | 0      | 0      | 1      | 0      | 0      | 0      | 0      | 0      | 0      |
| Serinicoccus      | 1              | 1              | 0      | 0      | 0      | 0      | 0      | 0      | 0      | 0      | 0      | 0      | 0      | 0      | 0      | 0      | 0      | 0      | 0      | 0      |
| Serratia          | 2              | 186            | 0      | 0      | 0      | 0      | 0      | 0      | 1      | 0      | 1      | 0      | 0      | 0      | 0      | 0      | 0      | 0      | 0      | 0      |
| Shewanella        | 3              | 214            | 0      | 0      | 0      | 0      | 0      | 0      | 0      | 0      | 0      | 1      | 0      | 0      | 0      | 0      | 0      | 0      | 0      | 0      |
| Shigella          | 2              | 172            | 0      | 0      | 0      | 0      | 0      | 0      | 0      | 0      | 0      | 0      | 0      | 1      | 0      | 0      | 0      | 0      | 0      | 0      |
| Shinella          | 1              | 2              | 0      | 0      | 0      | 0      | 0      | 0      | 0      | 0      | 0      | 0      | 0      | 0      | 0      | 0      | 0      | 0      | 0      | 0      |
| Sideroxydans      | 2              | 81             | 0      | 0      | 0      | 0      | 0      | 0      | 0      | 0      | 0      | 0      | 0      | 1      | 0      | 0      | 0      | 0      | 0      | 0      |
| Silicibacter      | 2              | 105            | 0      | 0      | 0      | 0      | 0      | 0      | 0      | 0      | 0      | 0      | 0      | 0      | 0      | 0      | 0      | 0      | 0      | 0      |
| Simiduia          | 1              | 18             | 0      | 0      | 0      | 0      | 0      | 0      | 0      | 0      | 0      | 0      | 0      | 0      | 0      | 0      | 0      | 0      | 0      | 0      |
| Simkania          | 1              | 6              | 0      | 0      | 0      | 0      | 0      | 0      | 0      | 0      | 0      | 0      | 0      | 0      | 0      | 0      | 0      | 0      | 0      | 0      |
| Simonsiella       | 1              | 2              | 0      | 0      | 0      | 0      | 0      | 0      | 0      | 0      | 0      | 0      | 0      | 0      | 0      | 0      | 0      | 0      | 0      | 0      |
| Singulisphaera    | 1              | 18             | 0      | 0      | 0      | 0      | 0      | 0      | 0      | 0      | 0      | 0      | 0      | 1      | 0      | 0      | 0      | 0      | 0      | 0      |
| Sinorhizobium     | 3              | 207            | 0      | 0      | 0      | 0      | 0      | 0      | 1      | 0      | 1      | 0      | 0      | 0      | 0      | 0      | 0      | 0      | 0      | 0      |
| Slackia           | 2              | 46             | 0      | 0      | 0      | 0      | 0      | 0      | 0      | 0      | 0      | 0      | 0      | 1      | 1      | 0      | 0      | 0      | 0      | 0      |
| Smaragdicoccus    | 1              | 3              | 0      | 0      | 0      | 0      | 0      | 0      | 0      | 0      | 0      | 0      | 0      | 1      | 0      | 0      | 0      | 0      | 0      | 0      |
| Sodalis           | 2              | 71             | 0      | 0      | 0      | 0      | 0      | 0      | 0      | 0      | 0      | 0      | 0      | 0      | 0      | 0      | 0      | 0      | 0      | 0      |
| Solibacillus      | 1              | 23             | 0      | 0      | 0      | 0      | 0      | 0      | 0      | 0      | 0      | 0      | 0      | 0      | 1      | 0      | 0      | 0      | 0      | 0      |
| Solitaea          | 1              | 13             | 0      | 0      | 0      | 0      | 0      | 0      | 0      | 0      | 0      | 0      | 0      | 0      | 0      | 0      | 0      | 0      | 0      | 0      |
| Sorangium         | 3              | 115            | 0      | 0      | 0      | 0      | 0      | 0      | 0      | 0      | 0      | 0      | 0      | 0      | 0      | 0      | 0      | 0      | 0      | 0      |
| Sphaerobacter     | 2              | 100            | 0      | 0      | 0      | 0      | 0      | 0      | 0      | 0      | 0      | 0      | 0      | 1      | 0      | 0      | 0      | 0      | 0      | 0      |
| Sphaerochaeta     | 1              | 42             | 0      | 0      | 0      | 0      | 0      | 0      | 0      | 0      | 0      | 0      | 0      | 0      | 0      | 0      | 0      | 0      | 0      | 0      |
| Sphingobacterium  | 3              | 85             | 0      | 0      | 0      | 0      | 0      | 0      | 0      | 0      | 0      | 0      | 0      | 0      | 0      | 0      | 0      | 0      | 0      | 0      |
| Sphingobium       | 1              | 179            | 0      | 0      | 0      | 0      | 0      | 0      | 1      | 0      | 0      | 0      | 0      | 0      | 1      | 1      | 0      | 0      | 0      | 0      |
| Sphingomonadaceae | 1              | 15             | 0      | 0      | 0      | 0      | 0      | 0      | 0      | 0      | 0      | 0      | 0      | 0      | 0      | 0      | 0      | 0      | 0      | 0      |
| Sphingomonas      | 2              | 220            | 0      | 0      | 0      | 0      | 0      | 0      | 1      | 0      | 1      | 1      | 0      | 0      | 0      | 0      | 0      | 1      | 0      | 0      |
| Sphingopyxis      | 3              | 99             | 0      | 0      | 0      | 0      | 0      | 0      | 0      | 0      | 0      | 0      | 0      | 0      | 1      | 0      | 0      | 0      | 0      | 0      |
| Spirochaeta       | 2              | 103            | 0      | 0      | 0      | 0      | 0      | 0      | 0      | 0      | 0      | 0      | 0      | 0      | 0      | 0      | 0      | 0      | 0      | 0      |
| Spiroplasma       | 1              | 6              | 0      | 0      | 0      | 0      | 0      | 0      | 0      | 0      | 0      | 0      | 0      | 0      | 0      | 0      | 0      | 0      | 0      | 0      |
| Spirosoma         | 2              | 107            | 0      | 0      | 0      | 0      | 0      | 0      | 0      | 0      | 0      | 0      | 0      | 1      | 0      | 0      | 0      | 0      | 0      | 0      |
| Stackebrandtia    | 2              | 110            | 0      | 0      | 0      | 0      | 0      | 0      | 0      | 0      | 0      | 0      | 0      | 0      | 0      | 0      | 0      | 0      | 0      | 0      |
| Stanieria         | 1              | 17             | 0      | 0      | 0      | 0      | 0      | 0      | 0      | 0      | 0      | 0      | 0      | 0      | 0      | 0      | 0      | 0      | 0      | 0      |
| Staphylococcus    | 2              | 108            | 0      | 0      | 0      | 0      | 0      | 0      | 0      | 0      | 0      | 0      | 0      | 0      | 0      | 0      | 0      | 0      | 0      | 0      |
| Staphylothermus   | 1              | 12             | 0      | 0      | 0      | 0      | 0      | 0      | 0      | 0      | 0      | 0      | 0      | 0      | 0      | 0      | 0      | 0      | 0      | 0      |

| Genus                  | Cluster Number | Protein Counts | K04112 | K04116 | K04117 | K04118 | K05296 | K05394 | K05549 | K05599 | K05783 | K05898 | K05913 | K06281 | K06446 | K06912 | K07408 | K07535 | K07536 | K07537 |
|------------------------|----------------|----------------|--------|--------|--------|--------|--------|--------|--------|--------|--------|--------|--------|--------|--------|--------|--------|--------|--------|--------|
| Stappia                | 1              | 2              | 0      | 0      | 0      | 0      | 0      | 0      | 0      | 0      | 0      | 0      | 0      | 0      | 0      | 0      | 0      | 0      | 0      | 0      |
| Starkeya               | 3              | 134            | 0      | 0      | 0      | 0      | 0      | 0      | 0      | 0      | 0      | 0      | 0      | 0      | 0      | 0      | 0      | 0      | 0      | 0      |
| Stenotrophomonas       | 3              | 104            | 0      | 0      | 0      | 0      | 0      | 0      | 0      | 0      | 0      | 0      | 0      | 0      | 0      | 0      | 0      | 0      | 0      | 0      |
| Stigmatella            | 3              | 129            | 0      | 0      | 0      | 0      | 0      | 0      | 0      | 0      | 0      | 0      | 0      | 0      | 0      | 0      | 0      | 0      | 0      | 0      |
| Streptobacillus        | 1              | 38             | 0      | 0      | 0      | 0      | 0      | 0      | 0      | 0      | 0      | 0      | 0      | 0      | 0      | 0      | 0      | 0      | 0      | 0      |
| Streptococcus          | 2              | 121            | 0      | 0      | 0      | 0      | 0      | 0      | 0      | 0      | 0      | 0      | 0      | 0      | 0      | 0      | 0      | 0      | 0      | 0      |
| Streptomyces           | 2              | 253            | 0      | 1      | 0      | 0      | 0      | 0      | 0      | 0      | 0      | 1      | 0      | 1      | 0      | 0      | 0      | 0      | 0      | 0      |
| Streptosporangium      | 3              | 148            | 0      | 0      | 0      | 0      | 0      | 0      | 0      | 0      | 0      | 0      | 0      | 1      | 0      | 0      | 0      | 1      | 0      | 0      |
| Strigomonas            | 1              | 2              | 0      | 0      | 0      | 0      | 0      | 0      | 0      | 0      | 0      | 0      | 0      | 0      | 0      | 0      | 0      | 0      | 0      | 0      |
| Sulfitobacter          | 1              | 10             | 0      | 0      | 0      | 0      | 0      | 0      | 0      | 0      | 0      | 0      | 0      | 0      | 0      | 0      | 0      | 0      | 0      | 0      |
| Sulfobacillus          | 1              | 30             | 0      | 1      | 0      | 0      | 0      | 0      | 0      | 0      | 0      | 0      | 0      | 1      | 0      | 0      | 0      | 1      | 0      | 0      |
| Sulfolobus             | 1              | 23             | 0      | 0      | 0      | 0      | 0      | 0      | 0      | 0      | 0      | 0      | 0      | 1      | 0      | 0      | 0      | 0      | 0      | 0      |
| Sulfuricurvum          | 2              | 67             | 0      | 0      | 0      | 0      | 0      | 0      | 0      | 0      | 0      | 0      | 0      | 0      | 0      | 0      | 0      | 0      | 0      | 0      |
| Sulfurihydrogenibium   | 2              | 55             | 0      | 0      | 0      | 0      | 0      | 0      | 0      | 0      | 0      | 0      | 0      | 0      | 0      | 0      | 0      | 0      | 0      | 0      |
| Sulfurimonas           | 2              | 60             | 0      | 0      | 0      | 0      | 0      | 0      | 0      | 0      | 0      | 0      | 0      | 0      | 0      | 0      | 0      | 0      | 0      | 0      |
| Sulfurospirillum       | 1              | 48             | 0      | 0      | 0      | 0      | 0      | 0      | 0      | 0      | 0      | 0      | 0      | 0      | 0      | 0      | 0      | 0      | 0      | 0      |
| Sulfurovum             | 2              | 48             | 0      | 0      | 0      | 0      | 0      | 0      | 0      | 0      | 0      | 0      | 0      | 0      | 0      | 0      | 0      | 0      | 0      | 0      |
| Symbiobacterium        | 2              | 68             | 0      | 0      | 0      | 0      | 0      | 0      | 0      | 0      | 0      | 0      | 0      | 0      | 0      | 0      | 0      | 0      | 0      | 0      |
| Synechococcus          | 1              | 34             | 0      | 0      | 0      | 0      | 0      | 0      | 0      | 0      | 0      | 0      | 0      | 0      | 0      | 0      | 0      | 0      | 0      | 0      |
| Synechocystis          | 1              | 40             | 0      | 0      | 0      | 0      | 0      | 0      | 0      | 0      | 0      | 0      | 0      | 0      | 0      | 0      | 0      | 0      | 0      | 0      |
| Synergistetes          | 1              | 27             | 0      | 0      | 0      | 0      | 0      | 0      | 0      | 0      | 0      | 0      | 0      | 0      | 0      | 0      | 0      | 0      | 0      | 0      |
| Syntrophobacter        | 2              | 101            | 0      | 0      | 0      | 0      | 0      | 0      | 0      | 0      | 0      | 0      | 0      | 0      | 0      | 0      | 0      | 0      | 0      | 0      |
| Syntrophobotulus       | 2              | 71             | 0      | 0      | 0      | 0      | 0      | 0      | 0      | 0      | 0      | 0      | 0      | 0      | 0      | 0      | 0      | 0      | 0      | 0      |
| Syntrophomonas         | 2              | 58             | 0      | 0      | 0      | 0      | 0      | 0      | 0      | 0      | 0      | 0      | 0      | 0      | 0      | 0      | 0      | 0      | 0      | 0      |
| Syntrophothermus       | 2              | 60             | 1      | 0      | 0      | 0      | 0      | 0      | 0      | 0      | 0      | 0      | 0      | 1      | 0      | 0      | 0      | 0      | 0      | 0      |
| Syntrophus             | 2              | 66             | 0      | 0      | 0      | 0      | 0      | 0      | 0      | 0      | 0      | 0      | 0      | 0      | 0      | 0      | 0      | 0      | 0      | 1      |
| Tannerella             | 1              | 8              | 0      | 0      | 0      | 0      | 0      | 0      | 0      | 0      | 0      | 0      | 0      | 0      | 0      | 0      | 0      | 0      | 0      | 0      |
| Taylorella             | 1              | 43             | 0      | 0      | 0      | 0      | 0      | 0      | 0      | 0      | 0      | 0      | 0      | 0      | 0      | 0      | 0      | 0      | 0      | 0      |
| Tepidanaerobacter      | 2              | 55             | 0      | 0      | 0      | 0      | 0      | 0      | 0      | 0      | 0      | 0      | 0      | 0      | 0      | 0      | 0      | 0      | 0      | 0      |
| Teredinibacter         | 2              | 109            | 0      | 0      | 0      | 0      | 0      | 0      | 0      | 0      | 0      | 0      | 0      | 0      | 0      | 0      | 0      | 0      | 0      | 0      |
| Terrabacter            | 1              | 1              | 0      | 0      | 0      | 0      | 0      | 0      | 0      | 0      | 0      | 0      | 0      | 0      | 0      | 0      | 0      | 0      | 0      | 0      |
| Terriglobus            | 2              | 83             | 0      | 0      | 0      | 0      | 0      | 0      | 0      | 0      | 0      | 0      | 0      | 0      | 0      | 0      | 0      | 0      | 0      | 0      |
| Tetragenococcus        | 1              | 12             | 0      | 0      | 0      | 0      | 0      | 0      | 0      | 0      | 0      | 0      | 0      | 0      | 0      | 0      | 0      | 0      | 0      | 0      |
| Thalassiobium          | 1              | 11             | 0      | 0      | 0      | 0      | 0      | 0      | 0      | 0      | 0      | 0      | 0      | 0      | 0      | 0      | 0      | 0      | 0      | 0      |
| Thalassobacter         | 1              | 9              | 0      | 0      | 0      | 0      | 0      | 0      | 0      | 0      | 0      | 0      | 0      | 0      | 0      | 0      | 0      | 0      | 0      | 0      |
| Thalassolituus         | 1              | 12             | 0      | 0      | 0      | 0      | 0      | 0      | 0      | 0      | 0      | 0      | 0      | 0      | 0      | 0      | 0      | 0      | 0      | 0      |
| Thalassospira          | 1              | 2              | 0      | 0      | 0      | 0      | 0      | 0      | 0      | 0      | 0      | 0      | 0      | 0      | 0      | 0      | 0      | 0      | 0      | 0      |
| Thauera                | 1              | 111            | 1      | 0      | 0      | 0      | 0      | 0      | 1      | 0      | 1      | 0      | 0      | 0      | 0      | 0      | 0      | 0      | 0      | 1      |
| Thermacetogenium       | 1              | 7              | 0      | 0      | 0      | 0      | 0      | 0      | 0      | 0      | 0      | 0      | 0      | 0      | 0      | 0      | 0      | 0      | 0      | 0      |
| Thermaerobacter        | 2              | 79             | 0      | 0      | 0      | 0      | 0      | 0      | 0      | 0      | 0      | 0      | 0      | 0      | 0      | 0      | 0      | 0      | 0      | 0      |
| Thermanaerovibrio      | 2              | 58             | 0      | 0      | 0      | 0      | 0      | 0      | 0      | 0      | 0      | 0      | 0      | 0      | 0      | 0      | 0      | 0      | 0      | 0      |
| Thermincola            | 2              | 62             | 0      | 0      | 0      | 0      | 0      | 0      | 0      | 0      | 0      | 0      | 0      | 1      | 0      | 0      | 0      | 0      | 0      | 0      |
| Thermoanaerobacter     | 2              | 76             | 0      | 0      | 0      | 0      | 0      | 0      | 0      | 0      | 0      | 0      | 0      | 0      | 0      | 0      | 0      | 0      | 0      | 0      |
| Thermoanaerobacterium  | 2              | 64             | 0      | 0      | 0      | 0      | 0      | 0      | 0      | 0      | 0      | 0      | 0      | 0      | 0      | 0      | 0      | 0      | 0      | 0      |
| Thermobacillus         | 1              | 11             | 0      | 0      | 0      | 0      | 0      | 0      | 0      | 0      | 0      | 0      | 0      | 0      | 0      | 0      | 0      | 0      | 0      | 0      |
| Thermobaculum          | 2              | 62             | 0      | 0      | 0      | 0      | 0      | 0      | 0      | 0      | 0      | 0      | 0      | 0      | 0      | 0      | 0      | 0      | 0      | 0      |
| Thermobifida           | 2              | 72             | 0      | 0      | 0      | 0      | 0      | 0      | 0      | 0      | 0      | 0      | 0      | 0      | 0      | 0      | 0      | 0      | 0      | 0      |
| Thermobispora          | 2              | 109            | 0      | 0      | 0      | 0      | 0      | 0      | 0      | 0      | 0      | 0      | 0      | 1      | 0      | 0      | 0      | 0      | 0      | 0      |
| Thermococcus           | 1              | 13             | 0      | 0      | 0      | 0      | 0      | 0      | 0      | 0      | 0      | 0      | 0      | 0      | 0      | 0      | 0      | 0      | 0      | 0      |
| Thermocrinis           | 2              | 60             | 0      | 0      | 0      | 0      | 0      | 0      | 0      | 0      | 0      | 0      | 0      | 1      | 0      | 0      | 0      | 0      | 0      | 0      |
| Thermodesulfator       | 1              | 10             | 0      | 0      | 0      | 0      | 0      | 0      | 0      | 0      | 0      | 0      | 0      | 1      | 0      | 0      | 0      | 0      | 0      | 0      |
| Thermodesulfobacterium | 1              | 9              | 0      | 0      | 0      | 0      | 0      | 0      | 0      | 0      | 0      | 0      | 0      | 1      | 0      | 0      | 0      | 0      | 0      | 0      |

| Genus                       | Cluster Number | Protein Counts | K04112 | K04116 | K04117 | K04118 | K05296 | K05394 | K05549 | K05599 | K05783 | K05898 | K05913 | K06281 | K06446 | K06912 | K07408 | K07535 | K07536 | K07537 |
|-----------------------------|----------------|----------------|--------|--------|--------|--------|--------|--------|--------|--------|--------|--------|--------|--------|--------|--------|--------|--------|--------|--------|
| <b>Thermodesulfobium</b>    | 1              | 13             | 0      | 0      | 0      | 0      | 0      | 0      | 0      | 0      | 0      | 0      | 0      | 1      | 0      | 0      | 0      | 0      | 0      | 0      |
| <b>Thermodesulfobivrio</b>  | 2              | 60             | 0      | 0      | 0      | 0      | 0      | 0      | 0      | 0      | 0      | 0      | 0      | 1      | 0      | 0      | 0      | 0      | 0      | 0      |
| <b>Thermofilum</b>          | 1              | 9              | 0      | 0      | 0      | 0      | 0      | 0      | 0      | 0      | 0      | 0      | 0      | 1      | 0      | 0      | 0      | 0      | 0      | 0      |
| <b>Thermogladus</b>         | 1              | 7              | 0      | 0      | 0      | 0      | 0      | 0      | 0      | 0      | 0      | 0      | 0      | 0      | 0      | 0      | 0      | 0      | 0      | 0      |
| <b>Thermomicrobium</b>      | 2              | 92             | 0      | 0      | 0      | 0      | 0      | 0      | 0      | 0      | 0      | 1      | 0      | 1      | 1      | 0      | 0      | 0      | 0      | 0      |
| <b>Thermomonospora</b>      | 2              | 125            | 0      | 0      | 0      | 0      | 0      | 0      | 0      | 0      | 0      | 1      | 0      | 1      | 1      | 0      | 0      | 0      | 0      | 0      |
| <b>Thermoplasma</b>         | 1              | 11             | 0      | 0      | 0      | 0      | 0      | 0      | 0      | 0      | 0      | 0      | 0      | 0      | 0      | 0      | 0      | 0      | 0      | 0      |
| <b>Thermoplasmatales</b>    | 1              | 6              | 0      | 0      | 0      | 0      | 0      | 0      | 0      | 0      | 0      | 0      | 0      | 0      | 0      | 0      | 0      | 0      | 0      | 0      |
| <b>Thermoproteus</b>        | 1              | 12             | 0      | 0      | 0      | 0      | 0      | 0      | 0      | 0      | 0      | 0      | 0      | 1      | 0      | 0      | 0      | 0      | 0      | 0      |
| <b>Thermosediminibacter</b> | 2              | 64             | 0      | 0      | 0      | 0      | 0      | 0      | 0      | 0      | 0      | 0      | 0      | 0      | 0      | 0      | 0      | 0      | 0      | 0      |
| <b>Thermosipho</b>          | 2              | 70             | 0      | 0      | 0      | 0      | 0      | 0      | 0      | 0      | 0      | 0      | 0      | 0      | 0      | 0      | 0      | 0      | 0      | 0      |
| <b>Thermosphaera</b>        | 1              | 10             | 0      | 0      | 0      | 0      | 0      | 0      | 0      | 0      | 0      | 0      | 0      | 0      | 0      | 0      | 0      | 0      | 0      | 0      |
| <b>Thermosynechococcus</b>  | 1              | 6              | 0      | 0      | 0      | 0      | 0      | 0      | 0      | 0      | 0      | 0      | 0      | 0      | 0      | 0      | 0      | 0      | 0      | 0      |
| <b>Thermotoga</b>           | 2              | 80             | 0      | 0      | 0      | 0      | 0      | 0      | 0      | 0      | 0      | 0      | 0      | 0      | 0      | 0      | 0      | 0      | 0      | 0      |
| <b>Thermovibrio</b>         | 2              | 58             | 0      | 0      | 0      | 0      | 0      | 0      | 0      | 0      | 0      | 0      | 0      | 1      | 0      | 0      | 0      | 0      | 0      | 0      |
| <b>Thermovirga</b>          | 1              | 9              | 0      | 0      | 0      | 0      | 0      | 0      | 0      | 0      | 0      | 0      | 0      | 0      | 0      | 0      | 0      | 0      | 0      | 0      |
| <b>Thermus</b>              | 2              | 107            | 0      | 0      | 0      | 0      | 0      | 0      | 1      | 0      | 0      | 0      | 0      | 1      | 0      | 0      | 0      | 0      | 0      | 0      |
| <b>Thioalkalimicrobium</b>  | 1              | 4              | 0      | 0      | 0      | 0      | 0      | 0      | 0      | 0      | 0      | 0      | 0      | 0      | 0      | 0      | 0      | 0      | 0      | 0      |
| <b>Thioalkalivibrio</b>     | 2              | 91             | 0      | 0      | 0      | 0      | 0      | 0      | 0      | 0      | 0      | 0      | 0      | 1      | 0      | 0      | 0      | 0      | 0      | 0      |
| <b>Thiobaca</b>             | 1              | 2              | 0      | 0      | 0      | 0      | 0      | 0      | 0      | 0      | 0      | 0      | 0      | 0      | 0      | 0      | 0      | 0      | 0      | 0      |
| <b>Thiobacillus</b>         | 2              | 67             | 0      | 0      | 0      | 0      | 0      | 1      | 0      | 0      | 0      | 0      | 0      | 1      | 0      | 0      | 0      | 0      | 0      | 0      |
| <b>Thiocapsa</b>            | 1              | 2              | 0      | 0      | 0      | 0      | 0      | 0      | 0      | 0      | 0      | 0      | 0      | 0      | 0      | 0      | 0      | 0      | 0      | 0      |
| <b>Thiocystis</b>           | 1              | 11             | 0      | 0      | 0      | 0      | 0      | 0      | 0      | 0      | 0      | 0      | 0      | 1      | 0      | 0      | 0      | 0      | 0      | 0      |
| <b>Thioflavococcus</b>      | 1              | 13             | 0      | 0      | 0      | 0      | 0      | 0      | 0      | 0      | 0      | 0      | 0      | 1      | 0      | 0      | 0      | 0      | 0      | 0      |
| <b>Thiomicrospira</b>       | 2              | 50             | 0      | 0      | 0      | 0      | 0      | 0      | 0      | 0      | 0      | 0      | 0      | 1      | 0      | 0      | 0      | 0      | 0      | 0      |
| <b>Thiomonas</b>            | 2              | 85             | 0      | 0      | 0      | 0      | 0      | 0      | 0      | 0      | 0      | 0      | 0      | 1      | 0      | 0      | 0      | 0      | 0      | 0      |
| <b>Thiorhodococcus</b>      | 1              | 2              | 0      | 0      | 0      | 0      | 0      | 0      | 0      | 0      | 0      | 0      | 0      | 0      | 0      | 0      | 0      | 0      | 0      | 0      |
| <b>Thiothrix</b>            | 1              | 2              | 0      | 0      | 0      | 0      | 0      | 0      | 0      | 0      | 0      | 0      | 0      | 0      | 0      | 0      | 0      | 0      | 0      | 0      |
| <b>Tistrella</b>            | 1              | 42             | 0      | 0      | 0      | 0      | 0      | 0      | 0      | 0      | 0      | 0      | 0      | 0      | 1      | 0      | 0      | 0      | 0      | 0      |
| <b>Tolumonas</b>            | 2              | 100            | 0      | 0      | 0      | 0      | 0      | 0      | 0      | 0      | 0      | 0      | 0      | 0      | 0      | 0      | 0      | 0      | 0      | 0      |
| <b>Transposon</b>           | 1              | 2              | 0      | 0      | 0      | 0      | 0      | 0      | 0      | 0      | 0      | 0      | 0      | 0      | 0      | 0      | 0      | 0      | 0      | 0      |
| <b>Treponema</b>            | 1              | 63             | 0      | 0      | 0      | 0      | 0      | 0      | 0      | 0      | 0      | 0      | 0      | 0      | 0      | 0      | 0      | 0      | 0      | 0      |
| <b>Trichodesmium</b>        | 2              | 71             | 0      | 0      | 0      | 0      | 0      | 0      | 0      | 0      | 0      | 0      | 0      | 0      | 0      | 0      | 0      | 0      | 0      | 0      |
| <b>Trichormus</b>           | 1              | 12             | 0      | 0      | 0      | 0      | 0      | 0      | 0      | 0      | 0      | 0      | 0      | 1      | 0      | 0      | 0      | 0      | 0      | 0      |
| <b>Tropheryma</b>           | 2              | 22             | 0      | 0      | 0      | 0      | 0      | 0      | 0      | 0      | 0      | 0      | 0      | 0      | 0      | 0      | 0      | 0      | 0      | 0      |
| <b>Truepera</b>             | 2              | 104            | 0      | 0      | 0      | 0      | 0      | 0      | 0      | 0      | 0      | 0      | 0      | 0      | 0      | 0      | 0      | 0      | 0      | 0      |
| <b>Tsukamurella</b>         | 2              | 123            | 0      | 0      | 0      | 0      | 0      | 0      | 0      | 0      | 0      | 1      | 0      | 0      | 0      | 0      | 0      | 0      | 0      | 0      |
| <b>Turneriella</b>          | 1              | 16             | 0      | 0      | 0      | 0      | 0      | 0      | 0      | 0      | 0      | 0      | 0      | 0      | 0      | 0      | 0      | 0      | 0      | 0      |
| <b>Uliginosibacterium</b>   | 1              | 2              | 0      | 0      | 0      | 0      | 0      | 0      | 0      | 0      | 0      | 0      | 0      | 0      | 0      | 0      | 0      | 0      | 0      | 0      |
| <b>Ureaplasma</b>           | 1              | 24             | 0      | 0      | 0      | 0      | 0      | 0      | 0      | 0      | 0      | 0      | 0      | 0      | 0      | 0      | 0      | 0      | 0      | 0      |
| <b>Ureibacillus</b>         | 1              | 2              | 0      | 0      | 0      | 0      | 0      | 0      | 0      | 0      | 0      | 0      | 0      | 0      | 0      | 0      | 0      | 0      | 0      | 0      |
| <b>Variovorax</b>           | 3              | 187            | 0      | 0      | 0      | 0      | 0      | 0      | 0      | 0      | 0      | 0      | 0      | 1      | 1      | 1      | 0      | 0      | 0      | 0      |
| <b>Veillonella</b>          | 1              | 54             | 0      | 0      | 0      | 0      | 0      | 0      | 0      | 0      | 0      | 0      | 0      | 1      | 0      | 0      | 0      | 0      | 0      | 0      |
| <b>Verminephrobacter</b>    | 3              | 188            | 0      | 1      | 1      | 0      | 0      | 0      | 0      | 0      | 0      | 0      | 0      | 0      | 1      | 0      | 0      | 1      | 1      | 0      |
| <b>Verrucosispora</b>       | 3              | 126            | 0      | 0      | 0      | 0      | 0      | 0      | 1      | 0      | 0      | 0      | 0      | 0      | 0      | 0      | 0      | 0      | 0      | 0      |
| <b>Vibrio</b>               | 2              | 195            | 0      | 0      | 0      | 0      | 0      | 0      | 1      | 0      | 1      | 0      | 0      | 0      | 0      | 0      | 0      | 0      | 0      | 0      |
| <b>Vibrionales</b>          | 1              | 46             | 0      | 0      | 0      | 0      | 0      | 0      | 0      | 0      | 0      | 0      | 0      | 0      | 0      | 0      | 0      | 0      | 0      | 0      |
| <b>Vitreoscilla</b>         | 1              | 1              | 0      | 0      | 0      | 0      | 0      | 0      | 0      | 0      | 0      | 0      | 0      | 0      | 0      | 0      | 0      | 0      | 0      | 0      |
| <b>Vulcanisaeta</b>         | 1              | 14             | 0      | 0      | 0      | 0      | 0      | 0      | 0      | 0      | 0      | 0      | 0      | 1      | 0      | 0      | 0      | 0      | 0      | 0      |
| <b>Waddlia</b>              | 2              | 68             | 0      | 0      | 0      | 0      | 0      | 0      | 0      | 0      | 0      | 0      | 0      | 0      | 0      | 0      | 0      | 0      | 0      | 0      |
| <b>Wautersia</b>            | 1              | 2              | 0      | 0      | 0      | 0      | 0      | 0      | 0      | 0      | 0      | 0      | 0      | 0      | 0      | 0      | 0      | 0      | 0      | 0      |
| <b>Weeksella</b>            | 2              | 65             | 0      | 0      | 0      | 0      | 0      | 0      | 0      | 0      | 0      | 0      | 0      | 0      | 0      | 0      | 0      | 0      | 0      | 0      |

| Genus             | Cluster Number | Protein Counts | K04112 | K04116 | K04117 | K04118 | K05296 | K05394 | K05549 | K05599 | K05783 | K05898 | K05913 | K06281 | K06446 | K06912 | K07408 | K07535 | K07536 | K07537 |
|-------------------|----------------|----------------|--------|--------|--------|--------|--------|--------|--------|--------|--------|--------|--------|--------|--------|--------|--------|--------|--------|--------|
| Weissella         | 1              | 14             | 0      | 0      | 0      | 0      | 0      | 0      | 0      | 0      | 0      | 0      | 0      | 0      | 0      | 0      | 0      | 0      | 0      | 0      |
| Wenxinia          | 1              | 2              | 0      | 0      | 0      | 0      | 0      | 0      | 0      | 0      | 0      | 0      | 0      | 0      | 0      | 0      | 0      | 0      | 0      | 0      |
| Wigglesworthia    | 1              | 29             | 0      | 0      | 0      | 0      | 0      | 0      | 0      | 0      | 0      | 0      | 0      | 0      | 0      | 0      | 0      | 0      | 0      | 0      |
| Wolbachia         | 1              | 32             | 0      | 0      | 0      | 0      | 0      | 0      | 0      | 0      | 0      | 0      | 0      | 0      | 0      | 0      | 0      | 0      | 0      | 0      |
| Wolinella         | 2              | 51             | 0      | 0      | 0      | 0      | 0      | 0      | 0      | 0      | 0      | 0      | 0      | 0      | 0      | 0      | 0      | 0      | 0      | 0      |
| Xanthobacter      | 3              | 176            | 0      | 1      | 1      | 0      | 0      | 0      | 1      | 0      | 1      | 0      | 0      | 1      | 1      | 0      | 0      | 1      | 1      | 0      |
| Xanthobacteraceae | 1              | 4              | 0      | 0      | 0      | 0      | 0      | 0      | 0      | 0      | 0      | 0      | 0      | 0      | 0      | 0      | 0      | 0      | 0      | 0      |
| Xanthomonadaceae  | 1              | 39             | 0      | 0      | 0      | 0      | 0      | 0      | 0      | 0      | 0      | 0      | 0      | 0      | 0      | 0      | 0      | 0      | 0      | 0      |
| Xanthomonas       | 2              | 162            | 0      | 0      | 0      | 0      | 0      | 0      | 0      | 0      | 0      | 0      | 0      | 0      | 0      | 0      | 0      | 0      | 0      | 0      |
| Xenorhabdus       | 2              | 127            | 0      | 0      | 0      | 0      | 0      | 0      | 0      | 0      | 0      | 0      | 0      | 0      | 0      | 0      | 0      | 0      | 0      | 0      |
| Xylanimonas       | 2              | 66             | 0      | 0      | 0      | 0      | 0      | 0      | 0      | 0      | 0      | 0      | 0      | 0      | 0      | 0      | 0      | 0      | 0      | 0      |
| Xylella           | 2              | 52             | 0      | 0      | 0      | 0      | 0      | 0      | 0      | 0      | 0      | 0      | 0      | 0      | 0      | 0      | 0      | 0      | 0      | 0      |
| Yersinia          | 2              | 145            | 0      | 0      | 0      | 0      | 0      | 0      | 0      | 0      | 0      | 0      | 0      | 1      | 0      | 0      | 0      | 0      | 0      | 0      |
| Yokenella         | 2              | 61             | 0      | 0      | 0      | 0      | 0      | 0      | 0      | 0      | 0      | 0      | 0      | 0      | 0      | 0      | 0      | 0      | 0      | 0      |
| Zobellia          | 1              | 28             | 0      | 0      | 0      | 0      | 0      | 0      | 0      | 0      | 0      | 0      | 0      | 1      | 0      | 0      | 0      | 0      | 0      | 0      |
| Zunongwangia      | 2              | 98             | 0      | 0      | 0      | 0      | 0      | 0      | 0      | 0      | 0      | 0      | 0      | 0      | 0      | 0      | 0      | 0      | 0      | 0      |
| Zymomonas         | 2              | 67             | 0      | 0      | 0      | 0      | 0      | 0      | 0      | 0      | 0      | 0      | 0      | 0      | 0      | 0      | 0      | 0      | 0      | 0      |
| Zymophilus        | 1              | 2              | 0      | 0      | 0      | 0      | 0      | 0      | 0      | 0      | 0      | 0      | 0      | 0      | 0      | 0      | 0      | 0      | 0      | 0      |

| Genus               | Cluster Number | Protein Counts | K07538 | K07540 | K07543 | K07545 | K07546 | K07547 | K07549 | K07823 | K07824 | K08295 | K08686 | K08689 | K08690 | K08710 | K09461 | K10215 | K10216 | K10217 |
|---------------------|----------------|----------------|--------|--------|--------|--------|--------|--------|--------|--------|--------|--------|--------|--------|--------|--------|--------|--------|--------|--------|
| Acaricomes          | 1              | 2              | 0      | 0      | 0      | 0      | 0      | 0      | 0      | 0      | 0      | 0      | 0      | 0      | 0      | 0      | 0      | 0      | 0      | 0      |
| Acaryochloris       | 2              | 88             | 0      | 0      | 0      | 0      | 0      | 0      | 0      | 0      | 0      | 0      | 0      | 0      | 0      | 0      | 0      | 0      | 0      | 0      |
| Acetivibrio         | 1              | 2              | 0      | 0      | 0      | 0      | 0      | 0      | 0      | 0      | 0      | 0      | 0      | 0      | 0      | 0      | 0      | 0      | 0      | 0      |
| Acetobacter         | 2              | 85             | 0      | 0      | 0      | 0      | 0      | 0      | 0      | 0      | 0      | 0      | 0      | 0      | 0      | 0      | 0      | 0      | 0      | 0      |
| Acetobacteraceae    | 1              | 2              | 0      | 0      | 0      | 0      | 0      | 0      | 0      | 0      | 0      | 0      | 0      | 0      | 0      | 0      | 0      | 0      | 0      | 0      |
| Acetobacterium      | 1              | 8              | 0      | 0      | 0      | 0      | 0      | 0      | 0      | 0      | 0      | 0      | 0      | 0      | 0      | 0      | 0      | 0      | 0      | 0      |
| Acetohalobium       | 2              | 79             | 0      | 0      | 0      | 0      | 0      | 0      | 0      | 0      | 0      | 0      | 0      | 0      | 0      | 0      | 0      | 0      | 0      | 0      |
| Acholeplasma        | 2              | 38             | 0      | 0      | 0      | 0      | 0      | 0      | 0      | 0      | 0      | 0      | 0      | 0      | 0      | 0      | 0      | 0      | 0      | 0      |
| Achromobacter       | 2              | 192            | 0      | 0      | 1      | 0      | 1      | 0      | 0      | 0      | 0      | 1      | 0      | 1      | 0      | 0      | 1      | 0      | 0      | 1      |
| Acidaminococcus     | 1              | 65             | 0      | 0      | 0      | 0      | 0      | 0      | 0      | 0      | 0      | 0      | 0      | 0      | 0      | 0      | 0      | 0      | 0      | 0      |
| Acidianus           | 1              | 9              | 0      | 0      | 0      | 0      | 0      | 0      | 0      | 0      | 0      | 0      | 0      | 0      | 0      | 0      | 0      | 0      | 0      | 0      |
| Acidilobus          | 1              | 8              | 0      | 0      | 0      | 0      | 0      | 0      | 0      | 0      | 0      | 0      | 0      | 0      | 0      | 0      | 0      | 0      | 0      | 0      |
| Acidimicrobium      | 2              | 58             | 0      | 0      | 0      | 0      | 0      | 0      | 0      | 0      | 0      | 0      | 0      | 0      | 0      | 0      | 0      | 0      | 0      | 0      |
| Acidiphilium        | 3              | 144            | 0      | 0      | 0      | 0      | 0      | 0      | 0      | 0      | 0      | 0      | 0      | 0      | 0      | 0      | 0      | 0      | 0      | 0      |
| Acidithiobacillus   | 2              | 70             | 0      | 0      | 0      | 0      | 0      | 0      | 0      | 0      | 0      | 0      | 0      | 0      | 0      | 0      | 0      | 0      | 0      | 0      |
| Acidobacterium      | 2              | 91             | 0      | 0      | 0      | 0      | 0      | 0      | 0      | 0      | 0      | 0      | 0      | 0      | 0      | 0      | 0      | 0      | 0      | 0      |
| Acidocella          | 1              | 2              | 0      | 0      | 0      | 0      | 0      | 0      | 0      | 0      | 0      | 0      | 0      | 0      | 0      | 0      | 0      | 0      | 0      | 0      |
| Acidothermus        | 2              | 68             | 0      | 0      | 0      | 0      | 0      | 0      | 0      | 0      | 0      | 0      | 0      | 0      | 0      | 0      | 0      | 0      | 0      | 0      |
| Acidovorax          | 3              | 217            | 0      | 0      | 0      | 0      | 0      | 0      | 0      | 0      | 0      | 1      | 0      | 1      | 0      | 0      | 1      | 0      | 1      | 1      |
| Aciduliprofundum    | 1              | 11             | 0      | 0      | 0      | 0      | 0      | 0      | 0      | 0      | 0      | 0      | 0      | 0      | 0      | 0      | 0      | 0      | 0      | 0      |
| Acinetobacter       | 3              | 188            | 0      | 0      | 0      | 0      | 0      | 0      | 0      | 1      | 0      | 0      | 0      | 0      | 0      | 1      | 0      | 0      | 0      | 0      |
| Actinobacillus      | 2              | 112            | 0      | 0      | 0      | 0      | 0      | 0      | 0      | 0      | 0      | 0      | 0      | 0      | 0      | 0      | 0      | 0      | 0      | 0      |
| Actinomadura        | 1              | 1              | 0      | 0      | 0      | 0      | 0      | 0      | 0      | 0      | 0      | 0      | 0      | 0      | 0      | 0      | 0      | 0      | 0      | 0      |
| Actinoplanes        | 1              | 52             | 0      | 0      | 0      | 0      | 0      | 0      | 0      | 0      | 0      | 0      | 0      | 0      | 0      | 0      | 0      | 0      | 0      | 0      |
| Actinopolyspora     | 1              | 2              | 0      | 0      | 0      | 0      | 0      | 0      | 0      | 0      | 0      | 0      | 0      | 0      | 0      | 0      | 0      | 0      | 0      | 0      |
| Actinosynnema       | 2              | 122            | 0      | 0      | 0      | 0      | 0      | 0      | 0      | 0      | 0      | 0      | 0      | 0      | 0      | 0      | 0      | 0      | 0      | 0      |
| Advenella           | 1              | 30             | 0      | 0      | 0      | 0      | 0      | 0      | 0      | 0      | 0      | 1      | 0      | 0      | 0      | 0      | 1      | 0      | 0      | 0      |
| Aequorivita         | 1              | 12             | 0      | 0      | 0      | 0      | 0      | 0      | 0      | 0      | 0      | 0      | 0      | 0      | 0      | 0      | 0      | 0      | 0      | 1      |
| Aerococcus          | 2              | 57             | 0      | 0      | 0      | 0      | 0      | 0      | 0      | 0      | 0      | 0      | 0      | 0      | 0      | 0      | 0      | 0      | 0      | 0      |
| Aeromonas           | 2              | 127            | 0      | 0      | 0      | 0      | 0      | 0      | 0      | 0      | 0      | 0      | 0      | 0      | 0      | 0      | 0      | 0      | 0      | 0      |
| Aeropyrum           | 1              | 13             | 0      | 0      | 0      | 0      | 0      | 0      | 0      | 0      | 0      | 0      | 0      | 0      | 0      | 0      | 0      | 0      | 0      | 0      |
| Afipia              | 1              | 54             | 0      | 0      | 0      | 0      | 0      | 0      | 0      | 0      | 0      | 0      | 0      | 0      | 0      | 0      | 0      | 0      | 0      | 0      |
| Aggregatibacter     | 1              | 81             | 0      | 0      | 0      | 0      | 0      | 0      | 0      | 0      | 0      | 0      | 0      | 0      | 0      | 0      | 0      | 0      | 0      | 0      |
| Agrobacterium       | 2              | 242            | 0      | 0      | 0      | 0      | 0      | 0      | 0      | 0      | 0      | 0      | 0      | 0      | 0      | 0      | 0      | 0      | 0      | 1      |
| Ahrensia            | 1              | 2              | 0      | 0      | 0      | 0      | 0      | 0      | 0      | 0      | 0      | 0      | 0      | 0      | 0      | 0      | 0      | 0      | 0      | 0      |
| Akkermansia         | 2              | 47             | 0      | 0      | 0      | 0      | 0      | 0      | 0      | 0      | 0      | 0      | 0      | 0      | 0      | 0      | 0      | 0      | 0      | 0      |
| Albidiferax         | 3              | 144            | 0      | 0      | 0      | 0      | 0      | 0      | 0      | 0      | 0      | 0      | 0      | 0      | 0      | 0      | 0      | 0      | 0      | 0      |
| Alcaligenes         | 1              | 21             | 0      | 0      | 0      | 0      | 0      | 0      | 0      | 0      | 0      | 0      | 0      | 0      | 0      | 0      | 0      | 0      | 0      | 1      |
| Alcanivorax         | 2              | 146            | 0      | 0      | 0      | 0      | 0      | 0      | 0      | 0      | 0      | 0      | 0      | 0      | 0      | 0      | 0      | 0      | 0      | 0      |
| Alicyclophilus      | 3              | 152            | 0      | 0      | 0      | 0      | 0      | 0      | 0      | 0      | 0      | 0      | 0      | 0      | 0      | 0      | 0      | 0      | 1      | 1      |
| Alicyclobacillus    | 2              | 91             | 0      | 0      | 0      | 0      | 0      | 0      | 0      | 0      | 0      | 0      | 0      | 0      | 0      | 0      | 0      | 0      | 0      | 1      |
| Aliivibrio          | 2              | 118            | 0      | 0      | 0      | 0      | 0      | 0      | 0      | 0      | 0      | 0      | 0      | 0      | 0      | 0      | 0      | 0      | 0      | 0      |
| Alishewanella       | 1              | 1              | 0      | 0      | 0      | 0      | 0      | 0      | 0      | 0      | 0      | 0      | 0      | 0      | 0      | 0      | 0      | 0      | 0      | 0      |
| Alistipes           | 1              | 52             | 0      | 0      | 0      | 0      | 0      | 0      | 0      | 0      | 0      | 0      | 0      | 0      | 0      | 0      | 0      | 0      | 0      | 0      |
| Alkalilimnicola     | 2              | 97             | 0      | 0      | 0      | 0      | 0      | 0      | 0      | 0      | 0      | 0      | 0      | 0      | 0      | 0      | 0      | 0      | 0      | 0      |
| Alkaliphilus        | 2              | 62             | 0      | 0      | 0      | 0      | 0      | 0      | 0      | 0      | 0      | 0      | 0      | 0      | 0      | 0      | 0      | 0      | 0      | 0      |
| Allochromatium      | 2              | 84             | 0      | 0      | 0      | 0      | 0      | 0      | 0      | 0      | 0      | 0      | 0      | 0      | 0      | 0      | 0      | 0      | 0      | 0      |
| Alphaproteobacteria | 1              | 3              | 0      | 0      | 0      | 0      | 0      | 0      | 0      | 0      | 0      | 0      | 0      | 0      | 0      | 0      | 0      | 0      | 0      | 0      |
| Alteromonadales     | 1              | 12             | 0      | 0      | 0      | 0      | 0      | 0      | 0      | 0      | 0      | 0      | 0      | 0      | 0      | 0      | 0      | 0      | 0      | 0      |
| Alteromonas         | 1              | 37             | 0      | 0      | 0      | 0      | 0      | 0      | 0      | 0      | 0      | 0      | 0      | 0      | 0      | 0      | 0      | 0      | 0      | 0      |
| Aminobacter         | 1              | 4              | 0      | 0      | 0      | 0      | 0      | 0      | 0      | 0      | 0      | 0      | 0      | 0      | 0      | 1      | 0      | 0      | 0      | 0      |
| Aminobacterium      | 2              | 59             | 0      | 0      | 0      | 0      | 0      | 0      | 0      | 0      | 0      | 0      | 0      | 0      | 0      | 0      | 0      | 0      | 0      | 0      |



| Genus            | Cluster Number | Protein Counts | K07538 | K07540 | K07543 | K07545 | K07546 | K07547 | K07549 | K07823 | K07824 | K08295 | K08686 | K08689 | K08690 | K08710 | K09461 | K10215 | K10216 | K10217 |
|------------------|----------------|----------------|--------|--------|--------|--------|--------|--------|--------|--------|--------|--------|--------|--------|--------|--------|--------|--------|--------|--------|
| Ammonifex        | 2              | 50             | 0      | 0      | 0      | 0      | 0      | 0      | 0      | 0      | 0      | 0      | 0      | 0      | 0      | 0      | 0      | 0      | 0      | 0      |
| Amphibacillus    | 1              | 13             | 0      | 0      | 0      | 0      | 0      | 0      | 0      | 0      | 0      | 0      | 0      | 0      | 0      | 0      | 0      | 0      | 0      | 0      |
| Amphritea        | 1              | 2              | 0      | 0      | 0      | 0      | 0      | 0      | 0      | 0      | 0      | 0      | 0      | 0      | 0      | 0      | 0      | 0      | 0      | 0      |
| Amycolatopsis    | 2              | 201            | 0      | 0      | 0      | 0      | 0      | 0      | 0      | 0      | 0      | 1      | 0      | 0      | 0      | 0      | 1      | 0      | 0      | 0      |
| Amycolicoccus    | 1              | 43             | 0      | 0      | 0      | 0      | 0      | 0      | 0      | 0      | 0      | 0      | 0      | 0      | 0      | 0      | 0      | 0      | 0      | 0      |
| Anabaena         | 2              | 92             | 0      | 0      | 0      | 0      | 0      | 0      | 0      | 0      | 0      | 0      | 0      | 0      | 0      | 0      | 0      | 0      | 0      | 0      |
| Anaerobaculum    | 1              | 11             | 0      | 0      | 0      | 0      | 0      | 0      | 0      | 0      | 0      | 0      | 0      | 0      | 0      | 0      | 0      | 0      | 0      | 0      |
| Anaerococcus     | 2              | 46             | 0      | 0      | 0      | 0      | 0      | 0      | 0      | 0      | 0      | 0      | 0      | 0      | 0      | 0      | 0      | 0      | 0      | 0      |
| Anaerolinea      | 2              | 66             | 0      | 0      | 0      | 0      | 0      | 0      | 0      | 0      | 0      | 0      | 0      | 0      | 0      | 0      | 0      | 0      | 0      | 0      |
| Anaeromyxobacter | 3              | 117            | 0      | 0      | 0      | 0      | 0      | 0      | 0      | 0      | 0      | 0      | 0      | 0      | 0      | 0      | 0      | 0      | 0      | 0      |
| Anaerostipes     | 1              | 44             | 0      | 0      | 0      | 0      | 0      | 0      | 0      | 0      | 0      | 0      | 0      | 0      | 0      | 0      | 0      | 0      | 0      | 0      |
| Anaerotruncus    | 1              | 2              | 0      | 0      | 0      | 0      | 0      | 0      | 0      | 0      | 0      | 0      | 0      | 0      | 0      | 0      | 0      | 0      | 0      | 0      |
| Anaplasma        | 1              | 35             | 0      | 0      | 0      | 0      | 0      | 0      | 0      | 0      | 0      | 0      | 0      | 0      | 0      | 0      | 0      | 0      | 0      | 0      |
| Ancylobacter     | 1              | 3              | 0      | 0      | 0      | 0      | 0      | 0      | 0      | 0      | 0      | 0      | 0      | 0      | 0      | 0      | 0      | 0      | 0      | 0      |
| Aneurinibacillus | 1              | 1              | 0      | 0      | 0      | 0      | 0      | 0      | 0      | 0      | 0      | 0      | 0      | 0      | 0      | 0      | 0      | 0      | 0      | 0      |
| Angomonas        | 1              | 1              | 0      | 0      | 0      | 0      | 0      | 0      | 0      | 0      | 0      | 0      | 0      | 0      | 0      | 0      | 0      | 0      | 0      | 0      |
| Anoxybacillus    | 2              | 72             | 0      | 0      | 0      | 0      | 0      | 0      | 0      | 0      | 0      | 0      | 0      | 0      | 0      | 0      | 0      | 0      | 0      | 0      |
| Aquifex          | 2              | 45             | 0      | 0      | 0      | 0      | 0      | 0      | 0      | 0      | 0      | 0      | 0      | 0      | 0      | 0      | 0      | 0      | 0      | 0      |
| Aquimarina       | 1              | 2              | 0      | 0      | 0      | 0      | 0      | 0      | 0      | 0      | 0      | 0      | 0      | 0      | 0      | 0      | 0      | 0      | 0      | 0      |
| Arcanobacterium  | 2              | 45             | 0      | 0      | 0      | 0      | 0      | 0      | 0      | 0      | 0      | 0      | 0      | 0      | 0      | 0      | 0      | 0      | 0      | 0      |
| Archaeoglobus    | 1              | 14             | 0      | 0      | 0      | 0      | 0      | 0      | 0      | 0      | 0      | 0      | 0      | 0      | 0      | 0      | 0      | 0      | 0      | 0      |
| Arcobacter       | 2              | 101            | 0      | 0      | 0      | 0      | 0      | 0      | 0      | 0      | 0      | 0      | 0      | 0      | 0      | 0      | 0      | 0      | 0      | 1      |
| Aromatoleum      | 3              | 133            | 1      | 1      | 1      | 1      | 1      | 0      | 1      | 0      | 0      | 0      | 0      | 0      | 0      | 0      | 1      | 0      | 0      | 0      |
| Arsenophonus     | 1              | 4              | 0      | 0      | 0      | 0      | 0      | 0      | 0      | 0      | 0      | 0      | 0      | 0      | 0      | 0      | 0      | 0      | 0      | 0      |
| Arthrobacter     | 2              | 206            | 0      | 0      | 0      | 0      | 0      | 0      | 0      | 0      | 0      | 1      | 0      | 0      | 0      | 1      | 1      | 0      | 0      | 0      |
| Arthrospira      | 2              | 67             | 0      | 0      | 0      | 0      | 0      | 0      | 0      | 0      | 0      | 0      | 0      | 0      | 0      | 0      | 0      | 0      | 0      | 0      |
| Aster            | 1              | 10             | 0      | 0      | 0      | 0      | 0      | 0      | 0      | 0      | 0      | 0      | 0      | 0      | 0      | 0      | 0      | 0      | 0      | 0      |
| Asticcacaulis    | 2              | 103            | 0      | 0      | 0      | 0      | 0      | 0      | 0      | 0      | 0      | 0      | 0      | 0      | 0      | 0      | 0      | 0      | 0      | 0      |
| Atopobium        | 1              | 28             | 0      | 0      | 0      | 0      | 0      | 0      | 0      | 0      | 0      | 0      | 0      | 0      | 0      | 0      | 0      | 0      | 0      | 0      |
| Aurantimonas     | 1              | 2              | 0      | 0      | 0      | 0      | 0      | 0      | 0      | 0      | 0      | 0      | 0      | 0      | 0      | 0      | 0      | 0      | 0      | 0      |
| Avibacterium     | 1              | 17             | 0      | 0      | 0      | 0      | 0      | 0      | 0      | 0      | 0      | 0      | 0      | 0      | 0      | 0      | 0      | 0      | 0      | 0      |
| Azoarcus         | 3              | 172            | 0      | 0      | 0      | 0      | 0      | 0      | 0      | 0      | 0      | 1      | 0      | 0      | 0      | 0      | 1      | 0      | 0      | 1      |
| Azorhizobium     | 3              | 149            | 0      | 0      | 0      | 0      | 0      | 0      | 0      | 0      | 0      | 1      | 0      | 0      | 0      | 0      | 1      | 0      | 0      | 0      |
| Azorhizophilus   | 1              | 4              | 0      | 0      | 0      | 0      | 0      | 0      | 0      | 0      | 0      | 0      | 0      | 0      | 0      | 0      | 0      | 0      | 0      | 0      |
| Azospira         | 1              | 19             | 0      | 0      | 0      | 0      | 0      | 0      | 0      | 0      | 0      | 0      | 0      | 0      | 0      | 0      | 0      | 0      | 0      | 0      |
| Azospirillum     | 2              | 198            | 0      | 0      | 0      | 0      | 0      | 0      | 0      | 0      | 0      | 1      | 0      | 0      | 0      | 0      | 0      | 0      | 0      | 0      |
| Azotobacter      | 3              | 183            | 0      | 0      | 0      | 0      | 0      | 0      | 0      | 1      | 0      | 0      | 0      | 0      | 0      | 0      | 0      | 0      | 0      | 1      |
| Bacillales       | 1              | 9              | 0      | 0      | 0      | 0      | 0      | 0      | 0      | 0      | 0      | 0      | 0      | 0      | 0      | 0      | 0      | 0      | 0      | 0      |
| Bacilli          | 1              | 3              | 0      | 0      | 0      | 0      | 0      | 0      | 0      | 0      | 0      | 0      | 0      | 0      | 0      | 0      | 0      | 0      | 0      | 0      |
| Bacillus         | 2              | 237            | 0      | 0      | 0      | 0      | 0      | 0      | 0      | 0      | 0      | 0      | 0      | 0      | 0      | 0      | 0      | 0      | 0      | 1      |
| Bacteria         | 2              | 86             | 0      | 0      | 0      | 0      | 0      | 0      | 0      | 0      | 0      | 0      | 0      | 0      | 0      | 0      | 1      | 0      | 0      | 0      |
| Bacteriovorax    | 2              | 98             | 0      | 0      | 0      | 0      | 0      | 0      | 0      | 0      | 0      | 0      | 0      | 0      | 0      | 0      | 0      | 0      | 0      | 0      |
| Bacteroidales    | 2              | 59             | 0      | 0      | 0      | 0      | 0      | 0      | 0      | 0      | 0      | 0      | 0      | 0      | 0      | 0      | 0      | 0      | 0      | 0      |
| Bacteroides      | 2              | 96             | 0      | 0      | 0      | 0      | 0      | 0      | 0      | 0      | 0      | 0      | 0      | 0      | 0      | 0      | 0      | 0      | 0      | 0      |
| Bacteroidetes    | 1              | 2              | 0      | 0      | 0      | 0      | 0      | 0      | 0      | 0      | 0      | 0      | 0      | 0      | 0      | 0      | 0      | 0      | 0      | 0      |
| Bartonella       | 2              | 50             | 0      | 0      | 0      | 0      | 0      | 0      | 0      | 0      | 0      | 0      | 0      | 0      | 0      | 0      | 0      | 0      | 0      | 0      |
| Baumannia        | 2              | 24             | 0      | 0      | 0      | 0      | 0      | 0      | 0      | 0      | 0      | 0      | 0      | 0      | 0      | 0      | 0      | 0      | 0      | 0      |
| Bdellovibrio     | 2              | 87             | 0      | 0      | 0      | 0      | 0      | 0      | 0      | 0      | 0      | 0      | 0      | 0      | 0      | 0      | 0      | 0      | 0      | 0      |
| Beijerinckia     | 3              | 123            | 0      | 0      | 0      | 0      | 0      | 0      | 0      | 0      | 0      | 0      | 0      | 0      | 0      | 0      | 0      | 0      | 0      | 0      |
| Belliella        | 1              | 14             | 0      | 0      | 0      | 0      | 0      | 0      | 0      | 0      | 0      | 0      | 0      | 0      | 0      | 0      | 0      | 0      | 0      | 0      |
| Beutenbergia     | 2              | 82             | 0      | 0      | 0      | 0      | 0      | 0      | 0      | 0      | 0      | 0      | 0      | 0      | 0      | 0      | 0      | 0      | 0      | 0      |
| Bifidobacterium  | 2              | 61             | 0      | 0      | 0      | 0      | 0      | 0      | 0      | 0      | 0      | 0      | 0      | 0      | 0      | 0      | 0      | 0      | 0      | 0      |

| Genus                | Cluster Number | Protein Counts | K07538 | K07540 | K07543 | K07545 | K07546 | K07547 | K07549 | K07823 | K07824 | K08295 | K08686 | K08689 | K08690 | K08710 | K09461 | K10215 | K10216 | K10217 |
|----------------------|----------------|----------------|--------|--------|--------|--------|--------|--------|--------|--------|--------|--------|--------|--------|--------|--------|--------|--------|--------|--------|
| Bizionia             | 1              | 1              | 0      | 0      | 0      | 0      | 0      | 0      | 0      | 0      | 0      | 0      | 0      | 0      | 0      | 0      | 0      | 0      | 0      | 0      |
| Blastococcus         | 1              | 39             | 0      | 0      | 0      | 0      | 0      | 0      | 0      | 0      | 0      | 1      | 0      | 0      | 0      | 0      | 1      | 0      | 0      | 0      |
| Blattabacterium      | 1              | 23             | 0      | 0      | 0      | 0      | 0      | 0      | 0      | 0      | 0      | 0      | 0      | 0      | 0      | 0      | 0      | 0      | 0      | 0      |
| Blautia              | 1              | 22             | 0      | 0      | 0      | 0      | 0      | 0      | 0      | 0      | 0      | 0      | 0      | 0      | 0      | 0      | 0      | 0      | 0      | 0      |
| Bordetella           | 3              | 227            | 0      | 0      | 1      | 0      | 0      | 0      | 0      | 0      | 0      | 1      | 0      | 0      | 1      | 0      | 1      | 0      | 0      | 1      |
| Borrelia             | 1              | 32             | 0      | 0      | 0      | 0      | 0      | 0      | 0      | 0      | 0      | 0      | 0      | 0      | 0      | 0      | 0      | 0      | 0      | 0      |
| Brachybacterium      | 1              | 18             | 0      | 0      | 0      | 0      | 0      | 0      | 0      | 0      | 0      | 0      | 0      | 0      | 0      | 0      | 0      | 0      | 0      | 0      |
| Brachymonas          | 1              | 4              | 0      | 0      | 0      | 0      | 0      | 0      | 0      | 0      | 0      | 0      | 0      | 0      | 0      | 0      | 0      | 0      | 0      | 0      |
| Brachyspira          | 2              | 79             | 0      | 0      | 0      | 0      | 0      | 0      | 0      | 0      | 0      | 0      | 0      | 0      | 0      | 0      | 0      | 0      | 0      | 0      |
| Bradyrhizobiaceae    | 1              | 20             | 0      | 0      | 0      | 0      | 0      | 0      | 0      | 0      | 0      | 0      | 0      | 0      | 0      | 0      | 0      | 0      | 0      | 0      |
| Bradyrhizobium       | 3              | 254            | 0      | 0      | 0      | 0      | 0      | 0      | 0      | 1      | 0      | 1      | 0      | 0      | 0      | 0      | 1      | 0      | 0      | 0      |
| Brenneria            | 1              | 20             | 0      | 0      | 0      | 0      | 0      | 0      | 0      | 0      | 0      | 0      | 0      | 0      | 0      | 0      | 0      | 0      | 0      | 0      |
| Brevibacillus        | 2              | 122            | 0      | 0      | 0      | 0      | 0      | 0      | 0      | 0      | 0      | 0      | 0      | 0      | 0      | 0      | 0      | 0      | 0      | 1      |
| Brevibacterium       | 1              | 4              | 0      | 0      | 0      | 0      | 0      | 0      | 0      | 0      | 0      | 0      | 0      | 0      | 0      | 0      | 0      | 0      | 0      | 0      |
| Brevundimonas        | 2              | 105            | 0      | 0      | 0      | 0      | 0      | 0      | 0      | 0      | 0      | 0      | 0      | 0      | 0      | 0      | 0      | 0      | 0      | 0      |
| Brucella             | 3              | 138            | 0      | 0      | 0      | 0      | 0      | 0      | 0      | 0      | 0      | 0      | 0      | 0      | 0      | 0      | 0      | 0      | 0      | 0      |
| Buchnera             | 1              | 26             | 0      | 0      | 0      | 0      | 0      | 0      | 0      | 0      | 0      | 0      | 0      | 0      | 0      | 0      | 0      | 0      | 0      | 0      |
| Burkholderia         | 3              | 424            | 0      | 0      | 1      | 0      | 1      | 0      | 0      | 0      | 1      | 1      | 1      | 1      | 1      | 1      | 1      | 0      | 1      | 1      |
| Burkholderiaceae     | 3              | 143            | 0      | 0      | 0      | 0      | 0      | 0      | 0      | 0      | 0      | 0      | 0      | 0      | 0      | 0      | 1      | 0      | 1      | 1      |
| Burkholderiales      | 1              | 24             | 0      | 0      | 0      | 0      | 0      | 0      | 0      | 0      | 0      | 0      | 0      | 0      | 0      | 0      | 0      | 0      | 0      | 0      |
| Buttiauxella         | 1              | 2              | 0      | 0      | 0      | 0      | 0      | 0      | 0      | 0      | 0      | 0      | 0      | 0      | 0      | 0      | 0      | 0      | 0      | 0      |
| Butyrivibrio         | 2              | 67             | 0      | 0      | 0      | 0      | 0      | 0      | 0      | 0      | 0      | 0      | 0      | 0      | 0      | 0      | 0      | 0      | 0      | 0      |
| Caldanaerobacter     | 2              | 63             | 0      | 0      | 0      | 0      | 0      | 0      | 0      | 0      | 0      | 0      | 0      | 0      | 0      | 0      | 0      | 0      | 0      | 0      |
| Caldicellulosiruptor | 2              | 75             | 0      | 0      | 0      | 0      | 0      | 0      | 0      | 0      | 0      | 0      | 0      | 0      | 0      | 0      | 0      | 0      | 0      | 0      |
| Caldilinea           | 1              | 23             | 0      | 0      | 0      | 0      | 0      | 0      | 0      | 0      | 0      | 0      | 0      | 0      | 0      | 0      | 0      | 0      | 0      | 0      |
| Caldimonas           | 1              | 6              | 0      | 0      | 0      | 0      | 0      | 0      | 0      | 0      | 0      | 0      | 0      | 0      | 0      | 0      | 0      | 0      | 0      | 0      |
| Caldisericum         | 1              | 10             | 0      | 0      | 0      | 0      | 0      | 0      | 0      | 0      | 0      | 0      | 0      | 0      | 0      | 0      | 0      | 0      | 0      | 0      |
| Caldisphaera         | 1              | 7              | 0      | 0      | 0      | 0      | 0      | 0      | 0      | 0      | 0      | 0      | 0      | 0      | 0      | 0      | 0      | 0      | 0      | 0      |
| Calditerrivibrio     | 2              | 74             | 0      | 0      | 0      | 0      | 0      | 0      | 0      | 0      | 0      | 0      | 0      | 0      | 0      | 0      | 0      | 0      | 0      | 0      |
| Caldivirga           | 1              | 13             | 0      | 0      | 0      | 0      | 0      | 0      | 0      | 0      | 0      | 0      | 0      | 0      | 0      | 0      | 0      | 0      | 0      | 0      |
| Calothrix            | 1              | 43             | 0      | 0      | 0      | 0      | 0      | 0      | 0      | 0      | 0      | 0      | 0      | 0      | 0      | 0      | 0      | 0      | 0      | 0      |
| Calyptogena          | 2              | 34             | 0      | 0      | 0      | 0      | 0      | 0      | 0      | 0      | 0      | 0      | 0      | 0      | 0      | 0      | 0      | 0      | 0      | 0      |
| Campylobacter        | 2              | 80             | 0      | 0      | 0      | 0      | 0      | 0      | 0      | 0      | 0      | 0      | 0      | 0      | 0      | 0      | 0      | 0      | 0      | 0      |
| Candidatus           | 2              | 290            | 0      | 0      | 0      | 0      | 0      | 0      | 0      | 1      | 0      | 1      | 0      | 0      | 0      | 0      | 0      | 0      | 0      | 1      |
| Capnocytophaga       | 1              | 50             | 0      | 0      | 0      | 0      | 0      | 0      | 0      | 0      | 0      | 0      | 0      | 0      | 0      | 0      | 0      | 0      | 0      | 0      |
| Carbophilus          | 1              | 2              | 0      | 0      | 0      | 0      | 0      | 0      | 0      | 0      | 0      | 0      | 0      | 0      | 0      | 0      | 0      | 0      | 0      | 0      |
| Carboxydibrachium    | 1              | 14             | 0      | 0      | 0      | 0      | 0      | 0      | 0      | 0      | 0      | 0      | 0      | 0      | 0      | 0      | 0      | 0      | 0      | 0      |
| Carboxydotherrmus    | 2              | 68             | 0      | 0      | 0      | 0      | 0      | 0      | 0      | 0      | 0      | 0      | 0      | 0      | 0      | 0      | 0      | 0      | 0      | 0      |
| Carica               | 1              | 2              | 0      | 0      | 0      | 0      | 0      | 0      | 0      | 0      | 0      | 0      | 0      | 0      | 0      | 0      | 0      | 0      | 0      | 0      |
| Carnobacterium       | 2              | 71             | 0      | 0      | 0      | 0      | 0      | 0      | 0      | 0      | 0      | 0      | 0      | 0      | 0      | 0      | 0      | 0      | 0      | 0      |
| Catenibacterium      | 1              | 2              | 0      | 0      | 0      | 0      | 0      | 0      | 0      | 0      | 0      | 0      | 0      | 0      | 0      | 0      | 0      | 0      | 0      | 0      |
| Catenovulum          | 1              | 2              | 0      | 0      | 0      | 0      | 0      | 0      | 0      | 0      | 0      | 0      | 0      | 0      | 0      | 0      | 0      | 0      | 0      | 0      |
| Catenulispora        | 3              | 159            | 0      | 0      | 0      | 0      | 0      | 0      | 0      | 0      | 0      | 1      | 0      | 0      | 0      | 0      | 1      | 0      | 0      | 0      |
| Caulobacter          | 3              | 168            | 0      | 0      | 0      | 0      | 0      | 0      | 0      | 1      | 0      | 0      | 0      | 0      | 0      | 0      | 0      | 0      | 0      | 0      |
| Cedecea              | 1              | 45             | 0      | 0      | 0      | 0      | 0      | 0      | 0      | 0      | 0      | 0      | 0      | 0      | 0      | 0      | 0      | 0      | 0      | 0      |
| Cellulomonas         | 2              | 96             | 0      | 0      | 0      | 0      | 0      | 0      | 0      | 0      | 0      | 0      | 0      | 0      | 0      | 0      | 0      | 0      | 0      | 0      |
| Cellulophaga         | 2              | 105            | 0      | 0      | 0      | 0      | 0      | 0      | 0      | 0      | 0      | 0      | 0      | 0      | 0      | 0      | 0      | 0      | 0      | 0      |
| Cellulosilyticum     | 1              | 14             | 0      | 0      | 0      | 0      | 0      | 0      | 0      | 0      | 0      | 0      | 0      | 0      | 0      | 0      | 0      | 0      | 0      | 0      |
| Cellvibrio           | 2              | 85             | 0      | 0      | 0      | 0      | 0      | 0      | 0      | 0      | 0      | 0      | 0      | 0      | 0      | 0      | 0      | 0      | 0      | 0      |
| Cenarchaeum          | 1              | 7              | 0      | 0      | 0      | 0      | 0      | 0      | 0      | 0      | 0      | 0      | 0      | 0      | 0      | 0      | 0      | 0      | 0      | 0      |
| Chamaesiphon         | 1              | 13             | 0      | 0      | 0      | 0      | 0      | 0      | 0      | 0      | 0      | 0      | 0      | 0      | 0      | 0      | 0      | 0      | 0      | 0      |
| Chelativorans        | 3              | 136            | 0      | 0      | 0      | 0      | 0      | 0      | 0      | 0      | 0      | 0      | 0      | 0      | 0      | 0      | 0      | 0      | 0      | 0      |

| Genus                  | Cluster Number | Protein Counts | K07538 | K07540 | K07543 | K07545 | K07546 | K07547 | K07549 | K07823 | K07824 | K08295 | K08686 | K08689 | K08690 | K08710 | K09461 | K10215 | K10216 | K10217 |
|------------------------|----------------|----------------|--------|--------|--------|--------|--------|--------|--------|--------|--------|--------|--------|--------|--------|--------|--------|--------|--------|--------|
| Chelatococcus          | 1              | 2              | 0      | 0      | 0      | 0      | 0      | 0      | 0      | 0      | 0      | 0      | 0      | 0      | 0      | 0      | 0      | 0      | 0      | 0      |
| Chitinophaga           | 2              | 98             | 0      | 0      | 0      | 0      | 0      | 0      | 0      | 0      | 0      | 0      | 0      | 0      | 0      | 0      | 0      | 0      | 0      | 0      |
| Chlamydia              | 1              | 36             | 0      | 0      | 0      | 0      | 0      | 0      | 0      | 0      | 0      | 0      | 0      | 0      | 0      | 0      | 0      | 0      | 0      | 0      |
| Chlamydomonas          | 1              | 3              | 0      | 0      | 0      | 0      | 0      | 0      | 0      | 0      | 0      | 0      | 0      | 0      | 0      | 0      | 0      | 0      | 0      | 0      |
| Chlamydomphila         | 1              | 31             | 0      | 0      | 0      | 0      | 0      | 0      | 0      | 0      | 0      | 0      | 0      | 0      | 0      | 0      | 0      | 0      | 0      | 0      |
| Chlorobaculum          | 2              | 61             | 0      | 0      | 0      | 0      | 0      | 0      | 0      | 0      | 0      | 0      | 0      | 0      | 0      | 0      | 0      | 0      | 0      | 0      |
| Chlorobium             | 2              | 89             | 0      | 0      | 0      | 0      | 0      | 0      | 0      | 0      | 0      | 0      | 0      | 0      | 0      | 0      | 0      | 0      | 0      | 0      |
| Chlorobium/Pelodictyon | 1              | 2              | 0      | 0      | 0      | 0      | 0      | 0      | 0      | 0      | 0      | 0      | 0      | 0      | 0      | 0      | 0      | 0      | 0      | 0      |
| Chloroflexus           | 2              | 105            | 0      | 0      | 0      | 0      | 0      | 0      | 0      | 0      | 0      | 0      | 0      | 0      | 0      | 0      | 0      | 0      | 0      | 1      |
| Chlorogloeopsis        | 1              | 9              | 0      | 0      | 0      | 0      | 0      | 0      | 0      | 0      | 0      | 0      | 0      | 0      | 0      | 0      | 0      | 0      | 0      | 0      |
| Chloroherpeton         | 2              | 59             | 0      | 0      | 0      | 0      | 0      | 0      | 0      | 0      | 0      | 0      | 0      | 0      | 0      | 0      | 0      | 0      | 0      | 0      |
| Chromobacterium        | 2              | 117            | 0      | 0      | 0      | 0      | 0      | 0      | 0      | 0      | 0      | 0      | 0      | 0      | 0      | 0      | 0      | 0      | 0      | 0      |
| Chromohalobacter       | 2              | 145            | 0      | 0      | 0      | 0      | 0      | 0      | 0      | 0      | 0      | 0      | 0      | 0      | 0      | 0      | 0      | 0      | 0      | 0      |
| Chroococciopsis        | 1              | 24             | 0      | 0      | 0      | 0      | 0      | 0      | 0      | 0      | 0      | 0      | 0      | 0      | 0      | 0      | 0      | 0      | 0      | 0      |
| Chryseobacterium       | 2              | 104            | 0      | 0      | 0      | 0      | 0      | 0      | 0      | 0      | 0      | 1      | 0      | 0      | 0      | 0      | 0      | 0      | 0      | 0      |
| Citricella             | 1              | 13             | 0      | 0      | 0      | 0      | 0      | 0      | 0      | 0      | 0      | 0      | 0      | 0      | 0      | 0      | 0      | 0      | 0      | 0      |
| Citrobacter            | 2              | 190            | 0      | 0      | 0      | 0      | 0      | 0      | 0      | 0      | 0      | 0      | 0      | 0      | 0      | 0      | 0      | 0      | 0      | 0      |
| Clavibacter            | 2              | 83             | 0      | 0      | 0      | 0      | 0      | 0      | 0      | 0      | 0      | 0      | 0      | 0      | 0      | 0      | 0      | 0      | 0      | 0      |
| Clonorchis             | 1              | 1              | 0      | 0      | 0      | 0      | 0      | 0      | 0      | 0      | 0      | 0      | 0      | 0      | 0      | 0      | 0      | 0      | 0      | 0      |
| Clostridiales          | 2              | 77             | 0      | 0      | 0      | 0      | 0      | 0      | 0      | 0      | 0      | 0      | 0      | 0      | 0      | 0      | 0      | 0      | 0      | 0      |
| Clostridium            | 2              | 191            | 0      | 0      | 0      | 0      | 0      | 0      | 0      | 0      | 0      | 0      | 0      | 0      | 0      | 0      | 0      | 0      | 0      | 0      |
| Cohnella               | 1              | 2              | 0      | 0      | 0      | 0      | 0      | 0      | 0      | 0      | 0      | 0      | 0      | 0      | 0      | 0      | 0      | 0      | 0      | 0      |
| Coleofasciculus        | 1              | 4              | 0      | 0      | 0      | 0      | 0      | 0      | 0      | 0      | 0      | 0      | 0      | 0      | 0      | 0      | 0      | 0      | 0      | 0      |
| Collimonas             | 1              | 35             | 0      | 0      | 0      | 0      | 0      | 0      | 0      | 0      | 0      | 0      | 0      | 0      | 0      | 0      | 0      | 0      | 0      | 0      |
| Colwellia              | 2              | 130            | 0      | 0      | 0      | 0      | 0      | 0      | 0      | 0      | 0      | 0      | 0      | 0      | 0      | 0      | 0      | 0      | 0      | 0      |
| Comamonas              | 2              | 196            | 0      | 0      | 0      | 0      | 0      | 0      | 0      | 0      | 0      | 1      | 0      | 1      | 0      | 1      | 1      | 0      | 1      | 1      |
| Conexibacter           | 3              | 117            | 0      | 0      | 0      | 0      | 0      | 0      | 0      | 0      | 0      | 0      | 0      | 0      | 0      | 0      | 1      | 0      | 0      | 0      |
| Coprobacillus          | 1              | 2              | 0      | 0      | 0      | 0      | 0      | 0      | 0      | 0      | 0      | 0      | 0      | 0      | 0      | 0      | 0      | 0      | 0      | 0      |
| Coprococcus            | 2              | 76             | 0      | 0      | 0      | 0      | 0      | 0      | 0      | 0      | 0      | 0      | 0      | 0      | 0      | 0      | 0      | 0      | 0      | 0      |
| Coprothermobacter      | 2              | 45             | 0      | 0      | 0      | 0      | 0      | 0      | 0      | 0      | 0      | 0      | 0      | 0      | 0      | 0      | 0      | 0      | 0      | 0      |
| Coralimargarita        | 2              | 68             | 0      | 0      | 0      | 0      | 0      | 0      | 0      | 0      | 0      | 0      | 0      | 0      | 0      | 0      | 0      | 0      | 0      | 0      |
| Corallococcus          | 1              | 29             | 0      | 0      | 0      | 0      | 0      | 0      | 0      | 0      | 0      | 0      | 0      | 0      | 0      | 0      | 0      | 0      | 0      | 1      |
| Coriobacterium         | 2              | 36             | 0      | 0      | 0      | 0      | 0      | 0      | 0      | 0      | 0      | 0      | 0      | 0      | 0      | 0      | 0      | 0      | 0      | 0      |
| Corynebacterineae      | 1              | 5              | 0      | 0      | 0      | 0      | 0      | 0      | 0      | 0      | 0      | 0      | 0      | 0      | 0      | 0      | 0      | 0      | 0      | 0      |
| Corynebacterium        | 2              | 175            | 0      | 0      | 0      | 0      | 0      | 0      | 0      | 0      | 0      | 0      | 0      | 0      | 0      | 0      | 0      | 1      | 0      | 0      |
| Coxiella               | 2              | 54             | 0      | 0      | 0      | 0      | 0      | 0      | 0      | 0      | 0      | 0      | 0      | 0      | 0      | 0      | 0      | 0      | 0      | 0      |
| Crinalium              | 1              | 21             | 0      | 0      | 0      | 0      | 0      | 0      | 0      | 0      | 0      | 0      | 0      | 0      | 0      | 0      | 0      | 0      | 0      | 0      |
| Croceibacter           | 2              | 80             | 0      | 0      | 0      | 0      | 0      | 0      | 0      | 0      | 0      | 0      | 0      | 0      | 0      | 0      | 0      | 0      | 0      | 1      |
| Crocospaera            | 1              | 6              | 0      | 0      | 0      | 0      | 0      | 0      | 0      | 0      | 0      | 0      | 0      | 0      | 0      | 0      | 0      | 0      | 0      | 0      |
| Cronobacter            | 2              | 120            | 0      | 0      | 0      | 0      | 0      | 0      | 0      | 0      | 0      | 0      | 0      | 0      | 0      | 0      | 0      | 0      | 0      | 0      |
| Cryptobacterium        | 2              | 39             | 0      | 0      | 0      | 0      | 0      | 0      | 0      | 0      | 0      | 0      | 0      | 0      | 0      | 0      | 0      | 0      | 0      | 0      |
| Cucumis                | 1              | 9              | 0      | 0      | 0      | 0      | 0      | 0      | 0      | 0      | 0      | 0      | 0      | 0      | 0      | 0      | 0      | 0      | 0      | 0      |
| Cupriavidus            | 3              | 317            | 0      | 0      | 0      | 0      | 1      | 0      | 0      | 0      | 0      | 1      | 0      | 1      | 1      | 0      | 1      | 0      | 1      | 1      |
| Curtobacterium         | 1              | 5              | 0      | 0      | 0      | 0      | 0      | 0      | 0      | 0      | 0      | 0      | 0      | 0      | 0      | 0      | 0      | 0      | 0      | 0      |
| Curvibacter            | 1              | 27             | 0      | 0      | 0      | 0      | 0      | 0      | 0      | 0      | 0      | 0      | 0      | 0      | 0      | 0      | 0      | 0      | 0      | 0      |
| Cyanobacterium         | 1              | 9              | 0      | 0      | 0      | 0      | 0      | 0      | 0      | 0      | 0      | 0      | 0      | 0      | 0      | 0      | 0      | 0      | 0      | 0      |
| Cyanobium              | 1              | 10             | 0      | 0      | 0      | 0      | 0      | 0      | 0      | 0      | 0      | 0      | 0      | 0      | 0      | 0      | 0      | 0      | 0      | 0      |
| Cyanothece             | 1              | 34             | 0      | 0      | 0      | 0      | 0      | 0      | 0      | 0      | 0      | 0      | 0      | 0      | 0      | 0      | 0      | 0      | 0      | 0      |
| Cyclobacterium         | 1              | 19             | 0      | 0      | 0      | 0      | 0      | 0      | 0      | 0      | 0      | 0      | 0      | 0      | 0      | 0      | 0      | 0      | 0      | 0      |
| Cycloclasticus         | 1              | 21             | 0      | 0      | 0      | 0      | 0      | 0      | 0      | 0      | 0      | 0      | 0      | 1      | 0      | 0      | 0      | 0      | 0      | 1      |
| Cylindrospermopsis     | 1              | 4              | 0      | 0      | 0      | 0      | 0      | 0      | 0      | 0      | 0      | 0      | 0      | 0      | 0      | 0      | 0      | 0      | 0      | 0      |
| Cylindrospermum        | 1              | 30             | 0      | 0      | 0      | 0      | 0      | 0      | 0      | 0      | 0      | 0      | 0      | 0      | 0      | 0      | 0      | 0      | 0      | 0      |

| Genus              | Cluster Number | Protein Counts | K07538 | K07540 | K07543 | K07545 | K07546 | K07547 | K07549 | K07823 | K07824 | K08295 | K08686 | K08689 | K08690 | K08710 | K09461 | K10215 | K10216 | K10217 |
|--------------------|----------------|----------------|--------|--------|--------|--------|--------|--------|--------|--------|--------|--------|--------|--------|--------|--------|--------|--------|--------|--------|
| Cytophaga          | 2              | 69             | 0      | 0      | 0      | 0      | 0      | 0      | 0      | 0      | 0      | 0      | 0      | 0      | 0      | 0      | 0      | 0      | 0      | 0      |
| Dactylococcopsis   | 1              | 8              | 0      | 0      | 0      | 0      | 0      | 0      | 0      | 0      | 0      | 0      | 0      | 0      | 0      | 0      | 0      | 0      | 0      | 0      |
| Dechloromonas      | 1              | 40             | 0      | 0      | 0      | 0      | 0      | 0      | 0      | 0      | 0      | 0      | 0      | 0      | 0      | 0      | 0      | 0      | 1      | 1      |
| Dechlorosoma       | 1              | 19             | 0      | 0      | 0      | 0      | 0      | 0      | 0      | 0      | 0      | 0      | 0      | 0      | 0      | 0      | 0      | 0      | 0      | 0      |
| Deferribacter      | 2              | 73             | 0      | 0      | 0      | 0      | 0      | 0      | 0      | 0      | 0      | 0      | 0      | 0      | 0      | 0      | 0      | 0      | 0      | 0      |
| Dehalobacter       | 1              | 9              | 0      | 0      | 0      | 0      | 0      | 0      | 0      | 0      | 0      | 0      | 0      | 0      | 0      | 0      | 0      | 0      | 0      | 0      |
| Dehalococcoides    | 2              | 41             | 0      | 0      | 0      | 0      | 0      | 0      | 0      | 0      | 0      | 0      | 0      | 0      | 0      | 0      | 0      | 0      | 0      | 0      |
| Dehalogenimonas    | 1              | 37             | 0      | 0      | 0      | 0      | 0      | 0      | 0      | 0      | 0      | 0      | 0      | 0      | 0      | 0      | 0      | 0      | 0      | 0      |
| Deinococcus        | 2              | 140            | 0      | 0      | 0      | 0      | 0      | 0      | 0      | 0      | 0      | 0      | 0      | 0      | 0      | 0      | 0      | 0      | 0      | 0      |
| Delftia            | 3              | 177            | 0      | 0      | 0      | 0      | 0      | 0      | 0      | 0      | 0      | 1      | 0      | 0      | 0      | 0      | 1      | 0      | 1      | 1      |
| Denitrovibrio      | 2              | 67             | 0      | 0      | 0      | 0      | 0      | 0      | 0      | 0      | 0      | 0      | 0      | 0      | 0      | 0      | 0      | 0      | 0      | 0      |
| Desulfarculus      | 2              | 92             | 0      | 0      | 0      | 0      | 0      | 0      | 0      | 0      | 0      | 0      | 0      | 0      | 0      | 0      | 0      | 0      | 0      | 0      |
| Desulfatibacillum  | 3              | 84             | 0      | 1      | 0      | 0      | 0      | 0      | 0      | 0      | 0      | 0      | 0      | 0      | 0      | 0      | 0      | 0      | 0      | 0      |
| Desulfitobacterium | 2              | 102            | 0      | 0      | 0      | 0      | 0      | 0      | 0      | 0      | 0      | 0      | 0      | 0      | 0      | 0      | 0      | 0      | 0      | 0      |
| Desulfobacca       | 2              | 65             | 0      | 0      | 0      | 0      | 0      | 0      | 0      | 0      | 0      | 1      | 0      | 0      | 0      | 0      | 0      | 0      | 0      | 0      |
| Desulfobacterium   | 2              | 113            | 0      | 0      | 0      | 0      | 0      | 0      | 0      | 0      | 0      | 0      | 0      | 0      | 0      | 0      | 0      | 0      | 0      | 0      |
| Desulfobacula      | 1              | 21             | 1      | 1      | 1      | 1      | 1      | 0      | 1      | 0      | 0      | 0      | 0      | 0      | 0      | 0      | 0      | 0      | 0      | 0      |
| Desulfobulbus      | 2              | 88             | 0      | 0      | 0      | 0      | 0      | 0      | 0      | 0      | 0      | 0      | 0      | 0      | 0      | 0      | 0      | 0      | 0      | 0      |
| Desulfocapsa       | 1              | 9              | 0      | 0      | 0      | 0      | 0      | 0      | 0      | 0      | 0      | 0      | 0      | 0      | 0      | 0      | 0      | 0      | 0      | 0      |
| Desulfococcus      | 2              | 80             | 0      | 0      | 0      | 0      | 0      | 0      | 0      | 0      | 0      | 0      | 0      | 0      | 0      | 0      | 0      | 0      | 0      | 0      |
| Desulfohalobium    | 2              | 52             | 0      | 0      | 0      | 0      | 0      | 0      | 0      | 0      | 0      | 0      | 0      | 0      | 0      | 0      | 0      | 0      | 0      | 0      |
| Desulfomicrobium   | 2              | 65             | 0      | 0      | 0      | 0      | 0      | 0      | 0      | 0      | 0      | 0      | 0      | 0      | 0      | 0      | 0      | 0      | 0      | 0      |
| Desulfomonile      | 1              | 25             | 1      | 0      | 0      | 0      | 0      | 0      | 0      | 0      | 0      | 0      | 0      | 0      | 0      | 0      | 0      | 0      | 0      | 0      |
| Desulforhabdus     | 1              | 2              | 0      | 0      | 0      | 0      | 0      | 0      | 0      | 0      | 0      | 0      | 0      | 0      | 0      | 0      | 0      | 0      | 0      | 0      |
| Desulfosporosinus  | 1              | 30             | 0      | 0      | 0      | 0      | 0      | 0      | 0      | 0      | 0      | 0      | 0      | 0      | 0      | 0      | 0      | 0      | 0      | 0      |
| Desulfotalea       | 2              | 66             | 0      | 0      | 0      | 0      | 0      | 0      | 0      | 0      | 0      | 0      | 0      | 0      | 0      | 0      | 0      | 0      | 0      | 0      |
| Desulfotomaculum   | 2              | 98             | 0      | 0      | 0      | 0      | 0      | 0      | 0      | 0      | 0      | 1      | 0      | 0      | 0      | 0      | 0      | 0      | 0      | 0      |
| Desulfovibrio      | 2              | 144            | 0      | 0      | 0      | 0      | 0      | 0      | 0      | 0      | 0      | 0      | 0      | 0      | 0      | 0      | 0      | 0      | 0      | 0      |
| Desulfurispirillum | 2              | 78             | 0      | 0      | 0      | 0      | 0      | 0      | 0      | 0      | 0      | 0      | 0      | 0      | 0      | 0      | 0      | 0      | 0      | 0      |
| Desulfurivibrio    | 2              | 71             | 0      | 0      | 0      | 0      | 0      | 0      | 0      | 0      | 0      | 0      | 0      | 0      | 0      | 0      | 0      | 0      | 0      | 0      |
| Desulfurobacterium | 2              | 53             | 0      | 0      | 0      | 0      | 0      | 0      | 0      | 0      | 0      | 0      | 0      | 0      | 0      | 0      | 0      | 0      | 0      | 0      |
| Desulfurococcus    | 1              | 11             | 0      | 0      | 0      | 0      | 0      | 0      | 0      | 0      | 0      | 0      | 0      | 0      | 0      | 0      | 0      | 0      | 0      | 0      |
| Diaphorobacter     | 1              | 16             | 0      | 0      | 0      | 0      | 0      | 0      | 0      | 0      | 0      | 0      | 0      | 0      | 0      | 0      | 0      | 0      | 1      | 1      |
| Dichelobacter      | 2              | 45             | 0      | 0      | 0      | 0      | 0      | 0      | 0      | 0      | 0      | 0      | 0      | 0      | 0      | 0      | 0      | 0      | 0      | 0      |
| Dickeya            | 2              | 155            | 0      | 0      | 0      | 0      | 0      | 0      | 0      | 0      | 0      | 0      | 0      | 0      | 0      | 0      | 0      | 0      | 0      | 0      |
| Dictyoglomus       | 2              | 62             | 0      | 0      | 0      | 0      | 0      | 0      | 0      | 0      | 0      | 0      | 0      | 0      | 0      | 0      | 0      | 0      | 0      | 0      |
| Dinoroseobacter    | 3              | 148            | 0      | 0      | 0      | 0      | 0      | 0      | 0      | 0      | 0      | 0      | 0      | 0      | 0      | 0      | 0      | 0      | 0      | 0      |
| Dokdonia           | 1              | 3              | 0      | 0      | 0      | 0      | 0      | 0      | 0      | 0      | 0      | 0      | 0      | 0      | 0      | 0      | 0      | 0      | 0      | 0      |
| Dorea              | 1              | 7              | 0      | 0      | 0      | 0      | 0      | 0      | 0      | 0      | 0      | 0      | 0      | 0      | 0      | 0      | 0      | 0      | 0      | 0      |
| Dyadobacter        | 2              | 83             | 0      | 0      | 0      | 0      | 0      | 0      | 0      | 0      | 0      | 0      | 0      | 0      | 0      | 0      | 0      | 0      | 0      | 0      |
| Echinicola         | 1              | 20             | 0      | 0      | 0      | 0      | 0      | 0      | 0      | 0      | 0      | 0      | 0      | 0      | 0      | 0      | 0      | 0      | 0      | 0      |
| Edwardsiella       | 2              | 126            | 0      | 0      | 0      | 0      | 0      | 0      | 0      | 0      | 0      | 0      | 0      | 0      | 0      | 0      | 0      | 0      | 0      | 0      |
| Eggerthella        | 1              | 51             | 0      | 0      | 0      | 0      | 0      | 0      | 0      | 0      | 0      | 0      | 0      | 0      | 0      | 0      | 0      | 0      | 0      | 0      |
| Ehrlichia          | 2              | 37             | 0      | 0      | 0      | 0      | 0      | 0      | 0      | 0      | 0      | 0      | 0      | 0      | 0      | 0      | 0      | 0      | 0      | 0      |
| Eikenella          | 1              | 4              | 0      | 0      | 0      | 0      | 0      | 0      | 0      | 0      | 0      | 0      | 0      | 0      | 0      | 0      | 0      | 0      | 0      | 0      |
| Elusimicrobium     | 2              | 44             | 0      | 0      | 0      | 0      | 0      | 0      | 0      | 0      | 0      | 0      | 0      | 0      | 0      | 0      | 0      | 0      | 0      | 0      |
| Emticicia          | 1              | 21             | 0      | 0      | 0      | 0      | 0      | 0      | 0      | 0      | 0      | 0      | 0      | 0      | 0      | 0      | 0      | 0      | 0      | 0      |
| Enhydrobacter      | 1              | 1              | 0      | 0      | 0      | 0      | 0      | 0      | 0      | 0      | 0      | 0      | 0      | 0      | 0      | 0      | 0      | 0      | 0      | 0      |
| Ensifer            | 1              | 2              | 0      | 0      | 0      | 0      | 0      | 0      | 0      | 0      | 0      | 0      | 0      | 0      | 0      | 0      | 0      | 0      | 0      | 0      |
| Enterobacter       | 2              | 202            | 0      | 0      | 0      | 0      | 0      | 0      | 0      | 0      | 0      | 0      | 0      | 0      | 0      | 0      | 0      | 0      | 0      | 0      |
| Enterobacteriaceae | 2              | 211            | 0      | 0      | 0      | 0      | 0      | 0      | 0      | 0      | 0      | 0      | 0      | 0      | 0      | 0      | 0      | 0      | 0      | 0      |
| Enterococcus       | 1              | 187            | 0      | 0      | 0      | 0      | 0      | 0      | 0      | 0      | 0      | 0      | 0      | 0      | 0      | 0      | 0      | 0      | 0      | 0      |

| Genus               | Cluster Number | Protein Counts | K07538 | K07540 | K07543 | K07545 | K07546 | K07547 | K07549 | K07823 | K07824 | K08295 | K08686 | K08689 | K08690 | K08710 | K09461 | K10215 | K10216 | K10217 |
|---------------------|----------------|----------------|--------|--------|--------|--------|--------|--------|--------|--------|--------|--------|--------|--------|--------|--------|--------|--------|--------|--------|
| Enterovibrio        | 1              | 15             | 0      | 0      | 0      | 0      | 0      | 0      | 0      | 0      | 0      | 0      | 0      | 0      | 0      | 0      | 0      | 0      | 0      | 0      |
| Erwinia             | 2              | 151            | 0      | 0      | 0      | 0      | 0      | 0      | 0      | 0      | 0      | 0      | 0      | 0      | 0      | 0      | 0      | 0      | 0      | 0      |
| Erysipelothrix      | 1              | 9              | 0      | 0      | 0      | 0      | 0      | 0      | 0      | 0      | 0      | 0      | 0      | 0      | 0      | 0      | 0      | 0      | 0      | 0      |
| Erysipelotrichaceae | 1              | 4              | 0      | 0      | 0      | 0      | 0      | 0      | 0      | 0      | 0      | 0      | 0      | 0      | 0      | 0      | 0      | 0      | 0      | 0      |
| Erythrobacter       | 2              | 80             | 0      | 0      | 0      | 0      | 0      | 0      | 0      | 0      | 0      | 0      | 0      | 0      | 0      | 0      | 0      | 0      | 0      | 0      |
| Escherichia         | 2              | 242            | 0      | 0      | 0      | 0      | 0      | 0      | 0      | 0      | 0      | 0      | 0      | 0      | 0      | 0      | 0      | 0      | 0      | 0      |
| Ethanoligenens      | 2              | 69             | 0      | 0      | 0      | 0      | 0      | 0      | 0      | 0      | 0      | 0      | 0      | 0      | 0      | 0      | 0      | 0      | 0      | 0      |
| Eubacteriaceae      | 1              | 2              | 0      | 0      | 0      | 0      | 0      | 0      | 0      | 0      | 0      | 0      | 0      | 0      | 0      | 0      | 0      | 0      | 0      | 0      |
| Eubacterium         | 2              | 103            | 0      | 0      | 0      | 0      | 0      | 0      | 0      | 0      | 0      | 0      | 0      | 0      | 0      | 0      | 0      | 0      | 0      | 0      |
| Eudoraea            | 1              | 4              | 0      | 0      | 0      | 0      | 0      | 0      | 0      | 0      | 0      | 0      | 0      | 0      | 0      | 0      | 0      | 0      | 0      | 0      |
| Euryarchaeota       | 1              | 1              | 0      | 0      | 0      | 0      | 0      | 0      | 0      | 0      | 0      | 0      | 0      | 0      | 0      | 0      | 0      | 0      | 0      | 0      |
| Exiguobacterium     | 2              | 93             | 0      | 0      | 0      | 0      | 0      | 0      | 0      | 0      | 0      | 0      | 0      | 0      | 0      | 0      | 0      | 0      | 0      | 0      |
| Faecalibacterium    | 1              | 12             | 0      | 0      | 0      | 0      | 0      | 0      | 0      | 0      | 0      | 0      | 0      | 0      | 0      | 0      | 0      | 0      | 0      | 0      |
| Ferrimonas          | 2              | 115            | 0      | 0      | 0      | 0      | 0      | 0      | 0      | 0      | 0      | 0      | 0      | 0      | 0      | 0      | 0      | 0      | 0      | 0      |
| Ferroglobus         | 1              | 14             | 0      | 0      | 0      | 0      | 0      | 0      | 0      | 0      | 0      | 0      | 0      | 0      | 0      | 0      | 0      | 0      | 0      | 0      |
| Ferroplasma         | 1              | 11             | 0      | 0      | 0      | 0      | 0      | 0      | 0      | 0      | 0      | 0      | 0      | 0      | 0      | 0      | 0      | 0      | 0      | 0      |
| Fervidicoccus       | 1              | 7              | 0      | 0      | 0      | 0      | 0      | 0      | 0      | 0      | 0      | 0      | 0      | 0      | 0      | 0      | 0      | 0      | 0      | 0      |
| Fervidobacterium    | 2              | 54             | 0      | 0      | 0      | 0      | 0      | 0      | 0      | 0      | 0      | 0      | 0      | 0      | 0      | 0      | 0      | 0      | 0      | 0      |
| Fibrella            | 1              | 17             | 0      | 0      | 0      | 0      | 0      | 0      | 0      | 0      | 0      | 0      | 0      | 0      | 0      | 0      | 0      | 0      | 0      | 0      |
| Fibroacter          | 2              | 52             | 0      | 0      | 0      | 0      | 0      | 0      | 0      | 0      | 0      | 0      | 0      | 0      | 0      | 0      | 0      | 0      | 0      | 0      |
| Filifactor          | 1              | 9              | 0      | 0      | 0      | 0      | 0      | 0      | 0      | 0      | 0      | 0      | 0      | 0      | 0      | 0      | 0      | 0      | 0      | 0      |
| Finegoldia          | 2              | 55             | 0      | 0      | 0      | 0      | 0      | 0      | 0      | 0      | 0      | 0      | 0      | 0      | 0      | 0      | 0      | 0      | 0      | 0      |
| Firmicutes          | 1              | 15             | 0      | 0      | 0      | 0      | 0      | 0      | 0      | 0      | 0      | 0      | 0      | 0      | 0      | 0      | 0      | 0      | 0      | 0      |
| Fischerella         | 1              | 15             | 0      | 0      | 0      | 0      | 0      | 0      | 0      | 0      | 0      | 0      | 0      | 0      | 0      | 0      | 0      | 0      | 0      | 0      |
| Flavobacteria       | 1              | 7              | 0      | 0      | 0      | 0      | 0      | 0      | 0      | 0      | 0      | 0      | 0      | 0      | 0      | 0      | 0      | 0      | 0      | 0      |
| Flavobacteriaceae   | 2              | 69             | 0      | 0      | 0      | 0      | 0      | 0      | 0      | 0      | 0      | 0      | 0      | 0      | 0      | 0      | 0      | 0      | 0      | 0      |
| Flavobacteriales    | 1              | 3              | 0      | 0      | 0      | 0      | 0      | 0      | 0      | 0      | 0      | 0      | 0      | 0      | 0      | 0      | 0      | 0      | 0      | 0      |
| Flavobacterium      | 2              | 103            | 0      | 0      | 0      | 0      | 0      | 0      | 0      | 0      | 0      | 1      | 0      | 0      | 0      | 0      | 1      | 0      | 0      | 0      |
| Flexibacter         | 1              | 17             | 0      | 0      | 0      | 0      | 0      | 0      | 0      | 0      | 0      | 0      | 0      | 0      | 0      | 0      | 0      | 0      | 0      | 1      |
| Flexistipes         | 1              | 11             | 0      | 0      | 0      | 0      | 0      | 0      | 0      | 0      | 0      | 0      | 0      | 0      | 0      | 0      | 0      | 0      | 0      | 0      |
| Fluoribacter        | 1              | 6              | 0      | 0      | 0      | 0      | 0      | 0      | 0      | 0      | 0      | 0      | 0      | 0      | 0      | 0      | 0      | 0      | 0      | 0      |
| Fluviicola          | 2              | 69             | 0      | 0      | 0      | 0      | 0      | 0      | 0      | 0      | 0      | 0      | 0      | 0      | 0      | 0      | 0      | 0      | 0      | 1      |
| Formosa             | 1              | 2              | 0      | 0      | 0      | 0      | 0      | 0      | 0      | 0      | 0      | 0      | 0      | 0      | 0      | 0      | 0      | 0      | 0      | 0      |
| Francisella         | 2              | 88             | 0      | 0      | 0      | 0      | 0      | 0      | 0      | 0      | 0      | 0      | 0      | 0      | 0      | 0      | 0      | 0      | 0      | 0      |
| Frankia             | 3              | 202            | 0      | 0      | 0      | 0      | 0      | 0      | 0      | 0      | 0      | 0      | 0      | 0      | 0      | 0      | 0      | 0      | 0      | 1      |
| Frateuria           | 1              | 25             | 0      | 0      | 0      | 0      | 0      | 0      | 0      | 0      | 0      | 0      | 0      | 0      | 0      | 0      | 0      | 0      | 0      | 0      |
| Fructobacillus      | 1              | 2              | 0      | 0      | 0      | 0      | 0      | 0      | 0      | 0      | 0      | 0      | 0      | 0      | 0      | 0      | 0      | 0      | 0      | 0      |
| Fulvimarina         | 1              | 2              | 0      | 0      | 0      | 0      | 0      | 0      | 0      | 0      | 0      | 0      | 0      | 0      | 0      | 0      | 0      | 0      | 0      | 0      |
| Fusobacterium       | 1              | 48             | 0      | 0      | 0      | 0      | 0      | 0      | 0      | 0      | 0      | 0      | 0      | 0      | 0      | 0      | 0      | 0      | 0      | 0      |
| Gallibacterium      | 2              | 87             | 0      | 0      | 0      | 0      | 0      | 0      | 0      | 0      | 0      | 0      | 0      | 0      | 0      | 0      | 0      | 0      | 0      | 0      |
| Gallionella         | 2              | 67             | 0      | 0      | 0      | 0      | 0      | 0      | 0      | 0      | 0      | 0      | 0      | 0      | 0      | 0      | 0      | 0      | 0      | 0      |
| Gammaproteobacteria | 1              | 9              | 0      | 0      | 0      | 0      | 0      | 0      | 0      | 0      | 0      | 0      | 0      | 0      | 0      | 0      | 0      | 0      | 0      | 0      |
| Gardnerella         | 1              | 31             | 0      | 0      | 0      | 0      | 0      | 0      | 0      | 0      | 0      | 0      | 0      | 0      | 0      | 0      | 0      | 0      | 0      | 0      |
| Geitlerinema        | 1              | 9              | 0      | 0      | 0      | 0      | 0      | 0      | 0      | 0      | 0      | 0      | 0      | 0      | 0      | 0      | 0      | 0      | 0      | 0      |
| Gemmatimonas        | 2              | 93             | 0      | 0      | 0      | 0      | 0      | 0      | 0      | 0      | 0      | 1      | 0      | 0      | 0      | 0      | 1      | 0      | 0      | 0      |
| Geobacillus         | 2              | 168            | 0      | 0      | 0      | 0      | 0      | 0      | 0      | 0      | 0      | 0      | 0      | 0      | 0      | 0      | 0      | 0      | 0      | 1      |
| Geobacter           | 2              | 150            | 1      | 1      | 1      | 1      | 1      | 1      | 1      | 0      | 0      | 0      | 0      | 0      | 0      | 0      | 0      | 0      | 0      | 0      |
| Geodermatophilus    | 2              | 136            | 0      | 0      | 0      | 0      | 0      | 0      | 0      | 0      | 0      | 0      | 0      | 0      | 0      | 0      | 0      | 0      | 0      | 0      |
| Geopsychrobacter    | 1              | 2              | 0      | 0      | 0      | 0      | 0      | 0      | 0      | 0      | 0      | 0      | 0      | 0      | 0      | 0      | 0      | 0      | 0      | 0      |
| Gillisia            | 1              | 11             | 0      | 0      | 0      | 0      | 0      | 0      | 0      | 0      | 0      | 0      | 0      | 0      | 0      | 0      | 0      | 0      | 0      | 0      |
| Gilvimarinus        | 1              | 4              | 0      | 0      | 0      | 0      | 0      | 0      | 0      | 0      | 0      | 0      | 0      | 0      | 0      | 0      | 0      | 0      | 0      | 0      |
| Glaciecola          | 2              | 117            | 0      | 0      | 0      | 0      | 0      | 0      | 0      | 0      | 0      | 0      | 0      | 0      | 0      | 0      | 0      | 0      | 0      | 0      |

| Genus             | Cluster Number | Protein Counts | K07538 | K07540 | K07543 | K07545 | K07546 | K07547 | K07549 | K07823 | K07824 | K08295 | K08686 | K08689 | K08690 | K08710 | K09461 | K10215 | K10216 | K10217 |
|-------------------|----------------|----------------|--------|--------|--------|--------|--------|--------|--------|--------|--------|--------|--------|--------|--------|--------|--------|--------|--------|--------|
| Gloeobacter       | 2              | 67             | 0      | 0      | 0      | 0      | 0      | 0      | 0      | 0      | 0      | 0      | 0      | 0      | 0      | 0      | 0      | 0      | 0      | 0      |
| Gloeocapsa        | 1              | 20             | 0      | 0      | 0      | 0      | 0      | 0      | 0      | 0      | 0      | 0      | 0      | 0      | 0      | 0      | 0      | 0      | 0      | 0      |
| Gloeotheca        | 1              | 1              | 0      | 0      | 0      | 0      | 0      | 0      | 0      | 0      | 0      | 0      | 0      | 0      | 0      | 0      | 0      | 0      | 0      | 0      |
| Gluconacetobacter | 2              | 96             | 0      | 0      | 0      | 0      | 0      | 0      | 0      | 0      | 0      | 0      | 0      | 0      | 0      | 0      | 0      | 0      | 0      | 0      |
| Gluconobacter     | 2              | 76             | 0      | 0      | 0      | 0      | 0      | 0      | 0      | 0      | 0      | 0      | 0      | 0      | 0      | 0      | 0      | 0      | 0      | 0      |
| Gordonia          | 1              | 158            | 0      | 0      | 0      | 0      | 0      | 0      | 0      | 0      | 0      | 0      | 0      | 0      | 0      | 0      | 0      | 0      | 0      | 1      |
| Gordonibacter     | 1              | 32             | 0      | 0      | 0      | 0      | 0      | 0      | 0      | 0      | 0      | 0      | 0      | 0      | 0      | 0      | 0      | 0      | 0      | 0      |
| Gramella          | 2              | 104            | 0      | 0      | 0      | 0      | 0      | 0      | 0      | 0      | 0      | 0      | 0      | 0      | 0      | 0      | 0      | 0      | 0      | 0      |
| Granulibacter     | 2              | 90             | 0      | 0      | 0      | 0      | 0      | 0      | 0      | 0      | 0      | 0      | 0      | 0      | 0      | 0      | 0      | 0      | 0      | 0      |
| Granulicella      | 2              | 98             | 0      | 0      | 0      | 0      | 0      | 0      | 0      | 0      | 0      | 0      | 0      | 0      | 0      | 0      | 0      | 0      | 0      | 0      |
| Grimontia         | 1              | 9              | 0      | 0      | 0      | 0      | 0      | 0      | 0      | 0      | 0      | 0      | 0      | 0      | 0      | 0      | 0      | 0      | 0      | 0      |
| Haemophilus       | 2              | 117            | 0      | 0      | 0      | 0      | 0      | 0      | 0      | 0      | 0      | 0      | 0      | 0      | 0      | 0      | 0      | 0      | 0      | 0      |
| Hafnia            | 1              | 29             | 0      | 0      | 0      | 0      | 0      | 0      | 0      | 0      | 0      | 0      | 0      | 0      | 0      | 0      | 0      | 0      | 0      | 0      |
| Hahella           | 3              | 130            | 0      | 0      | 0      | 0      | 0      | 0      | 0      | 0      | 0      | 0      | 0      | 0      | 0      | 0      | 0      | 0      | 0      | 0      |
| Halalkalicoccus   | 1              | 18             | 0      | 0      | 0      | 0      | 0      | 0      | 0      | 0      | 0      | 0      | 0      | 0      | 0      | 0      | 0      | 0      | 0      | 0      |
| Halanaerobium     | 2              | 89             | 0      | 0      | 0      | 0      | 0      | 0      | 0      | 0      | 0      | 0      | 0      | 0      | 0      | 0      | 0      | 0      | 0      | 0      |
| Haliangium        | 2              | 108            | 0      | 0      | 0      | 0      | 0      | 0      | 0      | 0      | 0      | 0      | 0      | 0      | 0      | 0      | 1      | 0      | 0      | 0      |
| Haliscomenobacter | 2              | 107            | 0      | 0      | 0      | 0      | 0      | 0      | 0      | 0      | 0      | 0      | 0      | 0      | 0      | 0      | 0      | 0      | 0      | 0      |
| Haloarcula        | 1              | 22             | 0      | 0      | 0      | 0      | 0      | 0      | 0      | 0      | 0      | 0      | 0      | 0      | 0      | 0      | 0      | 0      | 0      | 0      |
| Halobacillus      | 1              | 19             | 0      | 0      | 0      | 0      | 0      | 0      | 0      | 0      | 0      | 0      | 0      | 0      | 0      | 0      | 0      | 0      | 0      | 0      |
| Halobacteriaceae  | 1              | 1              | 0      | 0      | 0      | 0      | 0      | 0      | 0      | 0      | 0      | 0      | 0      | 0      | 0      | 0      | 0      | 0      | 0      | 0      |
| Halobacterium     | 1              | 10             | 0      | 0      | 0      | 0      | 0      | 0      | 0      | 0      | 0      | 0      | 0      | 0      | 0      | 0      | 0      | 0      | 0      | 0      |
| Halobacteroides   | 1              | 14             | 0      | 0      | 0      | 0      | 0      | 0      | 0      | 0      | 0      | 0      | 0      | 0      | 0      | 0      | 0      | 0      | 0      | 0      |
| Haloferax         | 1              | 20             | 0      | 0      | 0      | 0      | 0      | 0      | 0      | 0      | 0      | 0      | 0      | 0      | 0      | 0      | 0      | 0      | 0      | 0      |
| Halogeometricum   | 1              | 12             | 0      | 0      | 0      | 0      | 0      | 0      | 0      | 0      | 0      | 0      | 0      | 0      | 0      | 0      | 0      | 0      | 0      | 0      |
| Halomicrobium     | 1              | 10             | 0      | 0      | 0      | 0      | 0      | 0      | 0      | 0      | 0      | 0      | 0      | 0      | 0      | 0      | 0      | 0      | 0      | 0      |
| Halomonas         | 1              | 149            | 0      | 0      | 0      | 0      | 0      | 0      | 0      | 0      | 0      | 0      | 0      | 0      | 0      | 0      | 0      | 0      | 0      | 0      |
| Halopiger         | 1              | 16             | 0      | 0      | 0      | 0      | 0      | 0      | 0      | 0      | 0      | 0      | 0      | 0      | 0      | 0      | 0      | 0      | 0      | 0      |
| Haloquadratum     | 1              | 19             | 0      | 0      | 0      | 0      | 0      | 0      | 0      | 0      | 0      | 0      | 0      | 0      | 0      | 0      | 0      | 0      | 0      | 0      |
| Halorhabdus       | 1              | 10             | 0      | 0      | 0      | 0      | 0      | 0      | 0      | 0      | 0      | 0      | 0      | 0      | 0      | 0      | 0      | 0      | 0      | 0      |
| Halorhodospira    | 2              | 71             | 0      | 0      | 0      | 0      | 0      | 0      | 0      | 0      | 0      | 0      | 0      | 0      | 0      | 0      | 0      | 0      | 0      | 0      |
| Halorubrum        | 1              | 16             | 0      | 0      | 0      | 0      | 0      | 0      | 0      | 0      | 0      | 0      | 0      | 0      | 0      | 0      | 0      | 0      | 0      | 0      |
| Haloterrigena     | 1              | 19             | 0      | 0      | 0      | 0      | 0      | 0      | 0      | 0      | 0      | 0      | 0      | 0      | 0      | 0      | 0      | 0      | 0      | 0      |
| Halothece         | 1              | 9              | 0      | 0      | 0      | 0      | 0      | 0      | 0      | 0      | 0      | 0      | 0      | 0      | 0      | 0      | 0      | 0      | 0      | 0      |
| Halothermothrix   | 2              | 50             | 0      | 0      | 0      | 0      | 0      | 0      | 0      | 0      | 0      | 0      | 0      | 0      | 0      | 0      | 0      | 0      | 0      | 0      |
| Halothiobacillus  | 2              | 65             | 0      | 0      | 0      | 0      | 0      | 0      | 0      | 0      | 0      | 0      | 0      | 0      | 0      | 0      | 0      | 0      | 0      | 0      |
| Halovivax         | 1              | 12             | 0      | 0      | 0      | 0      | 0      | 0      | 0      | 0      | 0      | 1      | 0      | 0      | 0      | 0      | 1      | 0      | 0      | 0      |
| Helicobacter      | 2              | 79             | 0      | 0      | 0      | 0      | 0      | 0      | 0      | 0      | 0      | 0      | 0      | 0      | 0      | 0      | 0      | 0      | 0      | 0      |
| Heliobacillus     | 1              | 4              | 0      | 0      | 0      | 0      | 0      | 0      | 0      | 0      | 0      | 0      | 0      | 0      | 0      | 0      | 0      | 0      | 0      | 0      |
| Heliobacterium    | 2              | 51             | 0      | 0      | 0      | 0      | 0      | 0      | 0      | 0      | 0      | 0      | 0      | 0      | 0      | 0      | 0      | 0      | 0      | 0      |
| Herbaspirillum    | 2              | 172            | 0      | 0      | 0      | 0      | 0      | 0      | 0      | 0      | 0      | 0      | 0      | 0      | 0      | 1      | 0      | 0      | 0      | 1      |
| Herminiimonas     | 3              | 89             | 0      | 0      | 0      | 0      | 0      | 0      | 0      | 0      | 0      | 0      | 0      | 0      | 0      | 0      | 0      | 0      | 0      | 0      |
| Herpetosiphon     | 3              | 90             | 0      | 0      | 0      | 0      | 0      | 0      | 0      | 0      | 0      | 0      | 0      | 0      | 0      | 0      | 0      | 0      | 0      | 0      |
| Hippea            | 2              | 44             | 0      | 0      | 0      | 0      | 0      | 0      | 0      | 0      | 0      | 0      | 0      | 0      | 0      | 0      | 0      | 0      | 0      | 0      |
| Hirschia          | 2              | 102            | 0      | 0      | 0      | 0      | 0      | 0      | 0      | 0      | 0      | 0      | 0      | 0      | 0      | 0      | 0      | 0      | 0      | 0      |
| Histophilus       | 2              | 72             | 0      | 0      | 0      | 0      | 0      | 0      | 0      | 0      | 0      | 0      | 0      | 0      | 0      | 0      | 0      | 0      | 0      | 0      |
| Hoeflea           | 1              | 16             | 0      | 0      | 0      | 0      | 0      | 0      | 0      | 0      | 0      | 0      | 0      | 0      | 0      | 0      | 0      | 0      | 0      | 0      |
| Hydrogenivirga    | 1              | 2              | 0      | 0      | 0      | 0      | 0      | 0      | 0      | 0      | 0      | 0      | 0      | 0      | 0      | 0      | 0      | 0      | 0      | 0      |
| Hydrogenobacter   | 2              | 55             | 0      | 0      | 0      | 0      | 0      | 0      | 0      | 0      | 0      | 0      | 0      | 0      | 0      | 0      | 0      | 0      | 0      | 0      |
| Hydrogenobaculum  | 2              | 44             | 0      | 0      | 0      | 0      | 0      | 0      | 0      | 0      | 0      | 0      | 0      | 0      | 0      | 0      | 0      | 0      | 0      | 0      |
| Hydrogenophaga    | 1              | 9              | 0      | 0      | 0      | 0      | 0      | 0      | 0      | 0      | 0      | 0      | 0      | 0      | 0      | 0      | 0      | 0      | 0      | 0      |
| Hylemonella       | 1              | 4              | 0      | 0      | 0      | 0      | 0      | 0      | 0      | 0      | 0      | 0      | 0      | 0      | 0      | 0      | 0      | 0      | 0      | 0      |

| Genus                 | Cluster Number | Protein Counts | K07538 | K07540 | K07543 | K07545 | K07546 | K07547 | K07549 | K07823 | K07824 | K08295 | K08686 | K08689 | K08690 | K08710 | K09461 | K10215 | K10216 | K10217 |
|-----------------------|----------------|----------------|--------|--------|--------|--------|--------|--------|--------|--------|--------|--------|--------|--------|--------|--------|--------|--------|--------|--------|
| Hyperthermus          | 1              | 6              | 0      | 0      | 0      | 0      | 0      | 0      | 0      | 0      | 0      | 0      | 0      | 0      | 0      | 0      | 0      | 0      | 0      | 0      |
| Hyphomicrobium        | 2              | 93             | 0      | 0      | 0      | 0      | 0      | 0      | 0      | 0      | 0      | 0      | 0      | 0      | 0      | 0      | 0      | 0      | 0      | 0      |
| Hyphomonas            | 3              | 105            | 0      | 0      | 0      | 0      | 0      | 0      | 0      | 0      | 0      | 0      | 0      | 0      | 0      | 0      | 0      | 0      | 0      | 0      |
| Ideonella             | 1              | 18             | 0      | 0      | 0      | 0      | 0      | 0      | 0      | 0      | 0      | 0      | 0      | 0      | 0      | 0      | 0      | 0      | 0      | 1      |
| Idiomarina            | 2              | 86             | 0      | 0      | 0      | 0      | 0      | 0      | 0      | 0      | 0      | 0      | 0      | 0      | 0      | 0      | 0      | 0      | 0      | 0      |
| Ignavibacterium       | 1              | 14             | 0      | 0      | 0      | 0      | 0      | 0      | 0      | 0      | 0      | 0      | 0      | 0      | 0      | 0      | 0      | 0      | 0      | 0      |
| Ignicoccus            | 1              | 5              | 0      | 0      | 0      | 0      | 0      | 0      | 0      | 0      | 0      | 0      | 0      | 0      | 0      | 0      | 0      | 0      | 0      | 0      |
| Ignisphaera           | 1              | 8              | 0      | 0      | 0      | 0      | 0      | 0      | 0      | 0      | 0      | 0      | 0      | 0      | 0      | 0      | 0      | 0      | 0      | 0      |
| Ilyobacter            | 2              | 85             | 0      | 0      | 0      | 0      | 0      | 0      | 0      | 0      | 0      | 0      | 0      | 0      | 0      | 0      | 0      | 0      | 0      | 0      |
| Intrasporangium       | 2              | 114            | 0      | 0      | 0      | 0      | 0      | 0      | 0      | 0      | 0      | 0      | 0      | 0      | 0      | 0      | 0      | 0      | 0      | 0      |
| Isoptericola          | 1              | 18             | 0      | 0      | 0      | 0      | 0      | 0      | 0      | 0      | 0      | 0      | 0      | 0      | 0      | 0      | 0      | 0      | 0      | 0      |
| Isosphaera            | 2              | 75             | 0      | 0      | 0      | 0      | 0      | 0      | 0      | 0      | 0      | 0      | 0      | 0      | 0      | 0      | 0      | 0      | 0      | 0      |
| Jannaschia            | 3              | 151            | 0      | 0      | 0      | 0      | 0      | 0      | 0      | 0      | 0      | 1      | 0      | 0      | 0      | 0      | 1      | 0      | 0      | 0      |
| Janthinobacterium     | 2              | 99             | 0      | 0      | 0      | 0      | 0      | 0      | 0      | 0      | 0      | 0      | 0      | 0      | 0      | 0      | 0      | 0      | 0      | 0      |
| Jonesia               | 2              | 56             | 0      | 0      | 0      | 0      | 0      | 0      | 0      | 0      | 0      | 0      | 0      | 0      | 0      | 0      | 0      | 0      | 0      | 0      |
| Joostella             | 1              | 3              | 0      | 0      | 0      | 0      | 0      | 0      | 0      | 0      | 0      | 0      | 0      | 0      | 0      | 0      | 0      | 0      | 0      | 0      |
| Kaistia               | 1              | 2              | 0      | 0      | 0      | 0      | 0      | 0      | 0      | 0      | 0      | 0      | 0      | 0      | 0      | 0      | 0      | 0      | 0      | 0      |
| Kangiella             | 2              | 84             | 0      | 0      | 0      | 0      | 0      | 0      | 0      | 0      | 0      | 0      | 0      | 0      | 0      | 0      | 0      | 0      | 0      | 1      |
| Ketogulonicigenium    | 2              | 102            | 0      | 0      | 0      | 0      | 0      | 0      | 0      | 0      | 0      | 0      | 0      | 0      | 0      | 0      | 0      | 0      | 0      | 0      |
| Kineococcus           | 1              | 24             | 0      | 0      | 0      | 0      | 0      | 0      | 0      | 0      | 0      | 0      | 0      | 0      | 0      | 0      | 0      | 0      | 0      | 0      |
| Kinetoplastibacterium | 1              | 2              | 0      | 0      | 0      | 0      | 0      | 0      | 0      | 0      | 0      | 0      | 0      | 0      | 0      | 0      | 0      | 0      | 0      | 0      |
| Kingella              | 1              | 4              | 0      | 0      | 0      | 0      | 0      | 0      | 0      | 0      | 0      | 0      | 0      | 0      | 0      | 0      | 0      | 0      | 0      | 0      |
| Kitasatospora         | 1              | 36             | 0      | 0      | 0      | 0      | 0      | 0      | 0      | 0      | 0      | 0      | 0      | 0      | 0      | 0      | 0      | 0      | 0      | 0      |
| Klebsiella            | 3              | 222            | 0      | 0      | 0      | 0      | 0      | 0      | 0      | 0      | 0      | 0      | 0      | 0      | 0      | 0      | 0      | 0      | 0      | 0      |
| Kluyvera              | 1              | 1              | 0      | 0      | 0      | 0      | 0      | 0      | 0      | 0      | 0      | 0      | 0      | 0      | 0      | 0      | 0      | 0      | 0      | 0      |
| Kocuria               | 2              | 87             | 0      | 0      | 0      | 0      | 0      | 0      | 0      | 0      | 0      | 0      | 0      | 0      | 0      | 0      | 0      | 1      | 0      | 0      |
| Kordia                | 1              | 5              | 0      | 0      | 0      | 0      | 0      | 0      | 0      | 0      | 0      | 0      | 0      | 0      | 0      | 0      | 0      | 0      | 0      | 0      |
| Kosmotoga             | 2              | 61             | 0      | 0      | 0      | 0      | 0      | 0      | 0      | 0      | 0      | 0      | 0      | 0      | 0      | 0      | 0      | 0      | 0      | 0      |
| Kribbella             | 2              | 99             | 0      | 0      | 0      | 0      | 0      | 0      | 0      | 0      | 0      | 0      | 0      | 0      | 0      | 0      | 0      | 0      | 0      | 1      |
| Krokinobacter         | 2              | 90             | 0      | 0      | 0      | 0      | 0      | 0      | 0      | 0      | 0      | 0      | 0      | 0      | 0      | 0      | 0      | 0      | 0      | 1      |
| Kyrpidia              | 2              | 113            | 0      | 0      | 0      | 0      | 0      | 0      | 0      | 0      | 0      | 0      | 0      | 0      | 0      | 0      | 0      | 0      | 0      | 1      |
| Kytococcus            | 2              | 70             | 0      | 0      | 0      | 0      | 0      | 0      | 0      | 0      | 0      | 0      | 0      | 0      | 0      | 0      | 0      | 0      | 0      | 0      |
| Labrenzia             | 1              | 4              | 0      | 0      | 0      | 0      | 0      | 0      | 0      | 0      | 0      | 0      | 0      | 0      | 0      | 0      | 0      | 0      | 0      | 0      |
| Lachnoanaerobaculum   | 1              | 1              | 0      | 0      | 0      | 0      | 0      | 0      | 0      | 0      | 0      | 0      | 0      | 0      | 0      | 0      | 0      | 0      | 0      | 0      |
| Lachnospiraceae       | 1              | 51             | 0      | 0      | 0      | 0      | 0      | 0      | 0      | 0      | 0      | 0      | 0      | 0      | 0      | 0      | 0      | 0      | 0      | 0      |
| Lacinutrix            | 1              | 20             | 0      | 0      | 0      | 0      | 0      | 0      | 0      | 0      | 0      | 0      | 0      | 0      | 0      | 0      | 0      | 0      | 0      | 1      |
| Lactobacillus         | 2              | 119            | 0      | 0      | 0      | 0      | 0      | 0      | 0      | 0      | 0      | 0      | 0      | 0      | 0      | 0      | 0      | 0      | 0      | 0      |
| Lactococcus           | 2              | 82             | 0      | 0      | 0      | 0      | 0      | 0      | 0      | 0      | 0      | 0      | 0      | 0      | 0      | 0      | 0      | 0      | 0      | 0      |
| Lamprocystis          | 1              | 2              | 0      | 0      | 0      | 0      | 0      | 0      | 0      | 0      | 0      | 0      | 0      | 0      | 0      | 0      | 0      | 0      | 0      | 0      |
| Laribacter            | 2              | 80             | 0      | 0      | 0      | 0      | 0      | 0      | 0      | 0      | 0      | 0      | 0      | 0      | 0      | 0      | 0      | 0      | 0      | 0      |
| Lawsonia              | 2              | 33             | 0      | 0      | 0      | 0      | 0      | 0      | 0      | 0      | 0      | 0      | 0      | 0      | 0      | 0      | 0      | 0      | 0      | 0      |
| Leadbetterella        | 2              | 79             | 0      | 0      | 0      | 0      | 0      | 0      | 0      | 0      | 0      | 0      | 0      | 0      | 0      | 0      | 0      | 0      | 0      | 0      |
| Leeuwenhoekiiella     | 1              | 2              | 0      | 0      | 0      | 0      | 0      | 0      | 0      | 0      | 0      | 0      | 0      | 0      | 0      | 0      | 0      | 0      | 0      | 0      |
| Legionella            | 2              | 117            | 0      | 0      | 0      | 0      | 0      | 0      | 0      | 0      | 0      | 0      | 0      | 0      | 0      | 0      | 0      | 0      | 0      | 0      |
| Leifsonia             | 2              | 48             | 0      | 0      | 0      | 0      | 0      | 0      | 0      | 0      | 0      | 0      | 0      | 0      | 0      | 0      | 0      | 0      | 0      | 0      |
| Leptolyngbya          | 1              | 10             | 0      | 0      | 0      | 0      | 0      | 0      | 0      | 0      | 0      | 0      | 0      | 0      | 0      | 0      | 0      | 0      | 0      | 0      |
| Leptospira            | 2              | 76             | 0      | 0      | 0      | 0      | 0      | 0      | 0      | 0      | 0      | 0      | 0      | 0      | 0      | 0      | 0      | 0      | 0      | 0      |
| Leptospirillum        | 1              | 10             | 0      | 0      | 0      | 0      | 0      | 0      | 0      | 0      | 0      | 0      | 0      | 0      | 0      | 0      | 0      | 0      | 0      | 0      |
| Leptothrix            | 3              | 186            | 0      | 0      | 0      | 0      | 0      | 0      | 0      | 0      | 0      | 0      | 0      | 0      | 0      | 0      | 0      | 0      | 1      | 1      |
| Leptotrichia          | 2              | 43             | 0      | 0      | 0      | 0      | 0      | 0      | 0      | 0      | 0      | 0      | 0      | 0      | 0      | 0      | 0      | 0      | 0      | 0      |
| Leucobacter           | 1              | 2              | 0      | 0      | 0      | 0      | 0      | 0      | 0      | 0      | 0      | 0      | 0      | 0      | 0      | 0      | 0      | 0      | 0      | 0      |
| Leuconostoc           | 2              | 64             | 0      | 0      | 0      | 0      | 0      | 0      | 0      | 0      | 0      | 0      | 0      | 0      | 0      | 0      | 0      | 0      | 0      | 0      |

| Genus                | Cluster Number | Protein Counts | K07538 | K07540 | K07543 | K07545 | K07546 | K07547 | K07549 | K07823 | K07824 | K08295 | K08686 | K08689 | K08690 | K08710 | K09461 | K10215 | K10216 | K10217 |
|----------------------|----------------|----------------|--------|--------|--------|--------|--------|--------|--------|--------|--------|--------|--------|--------|--------|--------|--------|--------|--------|--------|
| Liberibacter         | 1              | 4              | 0      | 0      | 0      | 0      | 0      | 0      | 0      | 0      | 0      | 0      | 0      | 0      | 0      | 0      | 0      | 0      | 0      | 0      |
| Limnohabitans        | 1              | 11             | 0      | 0      | 0      | 0      | 0      | 0      | 0      | 0      | 0      | 0      | 0      | 0      | 0      | 0      | 0      | 0      | 0      | 0      |
| Listeria             | 2              | 77             | 0      | 0      | 0      | 0      | 0      | 0      | 0      | 0      | 0      | 0      | 0      | 0      | 0      | 0      | 0      | 0      | 0      | 0      |
| Listeriaceae         | 1              | 6              | 0      | 0      | 0      | 0      | 0      | 0      | 0      | 0      | 0      | 0      | 0      | 0      | 0      | 0      | 0      | 0      | 0      | 0      |
| Listonella           | 1              | 38             | 0      | 0      | 0      | 0      | 0      | 0      | 0      | 0      | 0      | 0      | 0      | 0      | 0      | 0      | 0      | 0      | 0      | 0      |
| Loktanella           | 1              | 3              | 0      | 0      | 0      | 0      | 0      | 0      | 0      | 0      | 0      | 0      | 0      | 0      | 0      | 0      | 0      | 0      | 0      | 0      |
| Lysinibacillus       | 2              | 97             | 0      | 0      | 0      | 0      | 0      | 0      | 0      | 0      | 0      | 0      | 0      | 0      | 0      | 0      | 0      | 0      | 0      | 0      |
| Macrococcus          | 2              | 60             | 0      | 0      | 0      | 0      | 0      | 0      | 0      | 0      | 0      | 0      | 0      | 0      | 0      | 0      | 0      | 0      | 0      | 0      |
| Magnetococcus        | 2              | 64             | 0      | 0      | 0      | 0      | 0      | 0      | 0      | 0      | 0      | 0      | 0      | 0      | 0      | 0      | 0      | 0      | 0      | 0      |
| Magnetospirillum     | 2              | 113            | 1      | 0      | 0      | 0      | 0      | 0      | 0      | 0      | 0      | 1      | 0      | 0      | 0      | 0      | 0      | 0      | 0      | 0      |
| Mahella              | 2              | 58             | 0      | 0      | 0      | 0      | 0      | 0      | 0      | 0      | 0      | 0      | 0      | 0      | 0      | 0      | 0      | 0      | 0      | 0      |
| Mannheimia           | 2              | 85             | 0      | 0      | 0      | 0      | 0      | 0      | 0      | 0      | 0      | 0      | 0      | 0      | 0      | 0      | 0      | 0      | 0      | 0      |
| Maribacter           | 3              | 87             | 0      | 0      | 0      | 0      | 0      | 0      | 0      | 0      | 0      | 0      | 0      | 0      | 0      | 0      | 0      | 0      | 0      | 0      |
| Maricaulis           | 3              | 87             | 0      | 0      | 0      | 0      | 0      | 0      | 0      | 0      | 0      | 1      | 0      | 0      | 0      | 0      | 1      | 0      | 0      | 0      |
| Marichromatium       | 1              | 2              | 0      | 0      | 0      | 0      | 0      | 0      | 0      | 0      | 0      | 0      | 0      | 0      | 0      | 0      | 0      | 0      | 0      | 0      |
| Marinithermus        | 2              | 77             | 0      | 0      | 0      | 0      | 0      | 0      | 0      | 0      | 0      | 0      | 0      | 0      | 0      | 0      | 0      | 0      | 0      | 0      |
| Marinitoga           | 1              | 15             | 0      | 0      | 0      | 0      | 0      | 0      | 0      | 0      | 0      | 0      | 0      | 0      | 0      | 0      | 0      | 0      | 0      | 0      |
| Marinobacter         | 2              | 163            | 0      | 0      | 0      | 0      | 0      | 0      | 0      | 0      | 0      | 0      | 0      | 0      | 0      | 0      | 0      | 0      | 1      | 1      |
| Marinomonas          | 3              | 192            | 0      | 0      | 0      | 0      | 0      | 0      | 0      | 0      | 0      | 0      | 0      | 0      | 0      | 0      | 0      | 0      | 0      | 0      |
| Maritimibacter       | 1              | 7              | 0      | 0      | 0      | 0      | 0      | 0      | 0      | 0      | 0      | 0      | 0      | 0      | 0      | 0      | 0      | 0      | 0      | 0      |
| Marivirga            | 2              | 96             | 0      | 0      | 0      | 0      | 0      | 0      | 0      | 0      | 0      | 0      | 0      | 0      | 0      | 0      | 0      | 0      | 0      | 1      |
| Martella             | 1              | 3              | 0      | 0      | 0      | 0      | 0      | 0      | 0      | 0      | 0      | 0      | 0      | 0      | 0      | 0      | 0      | 0      | 0      | 0      |
| Marvinbryantia       | 1              | 1              | 0      | 0      | 0      | 0      | 0      | 0      | 0      | 0      | 0      | 0      | 0      | 0      | 0      | 0      | 0      | 0      | 0      | 0      |
| Massilia             | 1              | 4              | 0      | 0      | 0      | 0      | 0      | 0      | 0      | 0      | 0      | 0      | 0      | 0      | 0      | 0      | 0      | 0      | 0      | 0      |
| Mastigocladopsis     | 1              | 16             | 0      | 0      | 0      | 0      | 0      | 0      | 0      | 0      | 0      | 0      | 0      | 0      | 0      | 0      | 0      | 0      | 0      | 0      |
| Megamonas            | 1              | 47             | 0      | 0      | 0      | 0      | 0      | 0      | 0      | 0      | 0      | 0      | 0      | 0      | 0      | 0      | 0      | 0      | 0      | 0      |
| Megasphaera          | 1              | 14             | 0      | 0      | 0      | 0      | 0      | 0      | 0      | 0      | 0      | 0      | 0      | 0      | 0      | 0      | 0      | 0      | 0      | 0      |
| Meiothermus          | 2              | 110            | 0      | 0      | 0      | 0      | 0      | 0      | 0      | 0      | 0      | 1      | 0      | 0      | 0      | 0      | 1      | 0      | 0      | 0      |
| Melissococcus        | 2              | 46             | 0      | 0      | 0      | 0      | 0      | 0      | 0      | 0      | 0      | 0      | 0      | 0      | 0      | 0      | 0      | 0      | 0      | 0      |
| Mesoflavibacter      | 1              | 6              | 0      | 0      | 0      | 0      | 0      | 0      | 0      | 0      | 0      | 0      | 0      | 0      | 0      | 0      | 0      | 0      | 0      | 0      |
| Mesoplasma           | 1              | 23             | 0      | 0      | 0      | 0      | 0      | 0      | 0      | 0      | 0      | 0      | 0      | 0      | 0      | 0      | 0      | 0      | 0      | 0      |
| Mesorhizobium        | 2              | 201            | 0      | 0      | 0      | 0      | 0      | 0      | 0      | 1      | 0      | 1      | 0      | 0      | 0      | 0      | 1      | 0      | 0      | 0      |
| Mesotoga             | 1              | 14             | 0      | 0      | 0      | 0      | 0      | 0      | 0      | 0      | 0      | 0      | 0      | 0      | 0      | 0      | 0      | 0      | 0      | 0      |
| Metallosphaera       | 1              | 18             | 0      | 0      | 0      | 0      | 0      | 0      | 0      | 0      | 0      | 0      | 0      | 0      | 0      | 0      | 0      | 0      | 0      | 0      |
| Methanobacterium     | 1              | 7              | 0      | 0      | 0      | 0      | 0      | 0      | 0      | 0      | 0      | 0      | 0      | 0      | 0      | 0      | 0      | 0      | 0      | 0      |
| Methanobrevibacter   | 1              | 9              | 0      | 0      | 0      | 0      | 0      | 0      | 0      | 0      | 0      | 0      | 0      | 0      | 0      | 0      | 0      | 0      | 0      | 0      |
| Methanocaldococcus   | 1              | 6              | 0      | 0      | 0      | 0      | 0      | 0      | 0      | 0      | 0      | 0      | 0      | 0      | 0      | 0      | 0      | 0      | 0      | 0      |
| Methanocella         | 1              | 15             | 0      | 0      | 0      | 0      | 0      | 0      | 0      | 0      | 0      | 0      | 0      | 0      | 0      | 0      | 0      | 0      | 0      | 0      |
| Methanococcaceae     | 1              | 1              | 0      | 0      | 0      | 0      | 0      | 0      | 0      | 0      | 0      | 0      | 0      | 0      | 0      | 0      | 0      | 0      | 0      | 0      |
| Methanococcoides     | 1              | 5              | 0      | 0      | 0      | 0      | 0      | 0      | 0      | 0      | 0      | 0      | 0      | 0      | 0      | 0      | 0      | 0      | 0      | 0      |
| Methanococcus        | 1              | 9              | 0      | 0      | 0      | 0      | 0      | 0      | 0      | 0      | 0      | 0      | 0      | 0      | 0      | 0      | 0      | 0      | 0      | 0      |
| Methanocorpusculum   | 1              | 7              | 0      | 0      | 0      | 0      | 0      | 0      | 0      | 0      | 0      | 0      | 0      | 0      | 0      | 0      | 0      | 0      | 0      | 0      |
| Methanoculleus       | 1              | 8              | 0      | 0      | 0      | 0      | 0      | 0      | 0      | 0      | 0      | 0      | 0      | 0      | 0      | 0      | 0      | 0      | 0      | 0      |
| Methanohalobium      | 1              | 5              | 0      | 0      | 0      | 0      | 0      | 0      | 0      | 0      | 0      | 0      | 0      | 0      | 0      | 0      | 0      | 0      | 0      | 0      |
| Methanohalophilus    | 1              | 5              | 0      | 0      | 0      | 0      | 0      | 0      | 0      | 0      | 0      | 0      | 0      | 0      | 0      | 0      | 0      | 0      | 0      | 0      |
| Methanolobus         | 1              | 5              | 0      | 0      | 0      | 0      | 0      | 0      | 0      | 0      | 0      | 0      | 0      | 0      | 0      | 0      | 0      | 0      | 0      | 0      |
| Methanomethylovorans | 1              | 5              | 0      | 0      | 0      | 0      | 0      | 0      | 0      | 0      | 0      | 0      | 0      | 0      | 0      | 0      | 0      | 0      | 0      | 0      |
| Methanoplanus        | 1              | 7              | 0      | 0      | 0      | 0      | 0      | 0      | 0      | 0      | 0      | 0      | 0      | 0      | 0      | 0      | 0      | 0      | 0      | 0      |
| Methanopyrus         | 1              | 4              | 0      | 0      | 0      | 0      | 0      | 0      | 0      | 0      | 0      | 0      | 0      | 0      | 0      | 0      | 0      | 0      | 0      | 0      |
| Methanoregula        | 1              | 8              | 0      | 0      | 0      | 0      | 0      | 0      | 0      | 0      | 0      | 0      | 0      | 0      | 0      | 0      | 0      | 0      | 0      | 0      |
| Methanosaeta         | 1              | 9              | 0      | 0      | 0      | 0      | 0      | 0      | 0      | 0      | 0      | 0      | 0      | 0      | 0      | 0      | 0      | 0      | 0      | 0      |
| Methanosalsum        | 1              | 7              | 0      | 0      | 0      | 0      | 0      | 0      | 0      | 0      | 0      | 0      | 0      | 0      | 0      | 0      | 0      | 0      | 0      | 0      |



| Genus               | Cluster Number | Protein Counts | K07538 | K07540 | K07543 | K07545 | K07546 | K07547 | K07549 | K07823 | K07824 | K08295 | K08686 | K08689 | K08690 | K08710 | K09461 | K10215 | K10216 | K10217 |
|---------------------|----------------|----------------|--------|--------|--------|--------|--------|--------|--------|--------|--------|--------|--------|--------|--------|--------|--------|--------|--------|--------|
| Methanosarcina      | 1              | 18             | 0      | 0      | 0      | 0      | 0      | 0      | 0      | 0      | 0      | 0      | 0      | 0      | 0      | 0      | 0      | 0      | 0      | 0      |
| Methanosphaera      | 1              | 7              | 0      | 0      | 0      | 0      | 0      | 0      | 0      | 0      | 0      | 0      | 0      | 0      | 0      | 0      | 0      | 0      | 0      | 0      |
| Methanosphaerula    | 1              | 8              | 0      | 0      | 0      | 0      | 0      | 0      | 0      | 0      | 0      | 0      | 0      | 0      | 0      | 0      | 0      | 0      | 0      | 0      |
| Methanospirillum    | 1              | 6              | 0      | 0      | 0      | 0      | 0      | 0      | 0      | 0      | 0      | 0      | 0      | 0      | 0      | 0      | 0      | 0      | 0      | 0      |
| Methanothermobacter | 1              | 6              | 0      | 0      | 0      | 0      | 0      | 0      | 0      | 0      | 0      | 0      | 0      | 0      | 0      | 0      | 0      | 0      | 0      | 0      |
| Methanothermococcus | 1              | 5              | 0      | 0      | 0      | 0      | 0      | 0      | 0      | 0      | 0      | 0      | 0      | 0      | 0      | 0      | 0      | 0      | 0      | 0      |
| Methanothermus      | 1              | 5              | 0      | 0      | 0      | 0      | 0      | 0      | 0      | 0      | 0      | 0      | 0      | 0      | 0      | 0      | 0      | 0      | 0      | 0      |
| Methanotorris       | 1              | 5              | 0      | 0      | 0      | 0      | 0      | 0      | 0      | 0      | 0      | 0      | 0      | 0      | 0      | 0      | 0      | 0      | 0      | 0      |
| Methylacidiphilum   | 2              | 48             | 0      | 0      | 0      | 0      | 0      | 0      | 0      | 0      | 0      | 0      | 0      | 0      | 0      | 0      | 0      | 0      | 0      | 0      |
| Methylarcula        | 1              | 2              | 0      | 0      | 0      | 0      | 0      | 0      | 0      | 0      | 0      | 0      | 0      | 0      | 0      | 0      | 0      | 0      | 0      | 0      |
| Methylibium         | 1              | 38             | 0      | 0      | 0      | 0      | 0      | 0      | 0      | 0      | 0      | 0      | 0      | 0      | 0      | 0      | 0      | 0      | 1      | 1      |
| Methylobacillus     | 2              | 61             | 0      | 0      | 0      | 0      | 0      | 0      | 0      | 0      | 0      | 0      | 0      | 0      | 0      | 0      | 0      | 0      | 0      | 0      |
| Methylobacterium    | 3              | 236            | 0      | 0      | 0      | 0      | 0      | 0      | 0      | 1      | 0      | 1      | 0      | 0      | 0      | 0      | 1      | 0      | 0      | 0      |
| Methylocella        | 3              | 117            | 0      | 0      | 0      | 0      | 0      | 0      | 0      | 0      | 0      | 0      | 0      | 0      | 0      | 0      | 0      | 0      | 0      | 1      |
| Methylococcus       | 2              | 80             | 0      | 0      | 0      | 0      | 0      | 0      | 0      | 0      | 0      | 0      | 0      | 0      | 0      | 0      | 0      | 0      | 0      | 0      |
| Methylocystis       | 1              | 21             | 0      | 0      | 0      | 0      | 0      | 0      | 0      | 0      | 0      | 0      | 0      | 0      | 0      | 0      | 0      | 0      | 0      | 0      |
| Methyloferula       | 1              | 2              | 0      | 0      | 0      | 0      | 0      | 0      | 0      | 0      | 0      | 0      | 0      | 0      | 0      | 0      | 0      | 0      | 0      | 0      |
| Methylomicrobium    | 1              | 12             | 0      | 0      | 0      | 0      | 0      | 0      | 0      | 0      | 0      | 0      | 0      | 0      | 0      | 0      | 0      | 0      | 0      | 0      |
| Methylomonas        | 1              | 15             | 0      | 0      | 0      | 0      | 0      | 0      | 0      | 0      | 0      | 0      | 0      | 0      | 0      | 0      | 0      | 0      | 0      | 0      |
| Methylophaga        | 1              | 7              | 0      | 0      | 0      | 0      | 0      | 0      | 0      | 0      | 0      | 0      | 0      | 0      | 0      | 0      | 0      | 0      | 0      | 0      |
| Methylophilus       | 1              | 2              | 0      | 0      | 0      | 0      | 0      | 0      | 0      | 0      | 0      | 0      | 0      | 0      | 0      | 0      | 0      | 0      | 0      | 0      |
| Methylosinus        | 1              | 2              | 0      | 0      | 0      | 0      | 0      | 0      | 0      | 0      | 0      | 0      | 0      | 0      | 0      | 0      | 0      | 0      | 0      | 0      |
| Methylotenera       | 2              | 72             | 0      | 0      | 0      | 0      | 0      | 0      | 0      | 0      | 0      | 0      | 0      | 0      | 0      | 0      | 0      | 0      | 0      | 0      |
| Methyloversatilis   | 1              | 5              | 0      | 0      | 0      | 0      | 0      | 0      | 0      | 0      | 0      | 0      | 0      | 0      | 0      | 0      | 0      | 0      | 0      | 0      |
| Methylovorus        | 2              | 66             | 0      | 0      | 0      | 0      | 0      | 0      | 0      | 0      | 0      | 0      | 0      | 0      | 0      | 0      | 0      | 0      | 0      | 0      |
| Micavibrio          | 1              | 9              | 0      | 0      | 0      | 0      | 0      | 0      | 0      | 0      | 0      | 0      | 0      | 0      | 0      | 0      | 0      | 0      | 0      | 0      |
| Microbacterium      | 2              | 115            | 0      | 0      | 0      | 0      | 0      | 0      | 0      | 0      | 0      | 0      | 0      | 0      | 0      | 0      | 1      | 0      | 0      | 0      |
| Microchaete         | 1              | 23             | 0      | 0      | 0      | 0      | 0      | 0      | 0      | 0      | 0      | 0      | 0      | 0      | 0      | 0      | 0      | 0      | 0      | 0      |
| Micrococcus         | 2              | 72             | 0      | 0      | 0      | 0      | 0      | 0      | 0      | 0      | 0      | 0      | 0      | 0      | 0      | 0      | 0      | 0      | 0      | 0      |
| Microcoleus         | 1              | 17             | 0      | 0      | 0      | 0      | 0      | 0      | 0      | 0      | 0      | 0      | 0      | 0      | 0      | 0      | 0      | 0      | 0      | 0      |
| Microcystis         | 2              | 67             | 0      | 0      | 0      | 0      | 0      | 0      | 0      | 0      | 0      | 0      | 0      | 0      | 0      | 0      | 0      | 0      | 0      | 0      |
| Microlunatus        | 1              | 25             | 0      | 0      | 0      | 0      | 0      | 0      | 0      | 0      | 0      | 0      | 0      | 0      | 0      | 0      | 0      | 0      | 0      | 0      |
| Micromonospora      | 2              | 115            | 0      | 0      | 0      | 0      | 0      | 0      | 0      | 0      | 0      | 0      | 0      | 0      | 0      | 0      | 0      | 0      | 0      | 1      |
| Microvirga          | 1              | 6              | 0      | 0      | 0      | 0      | 0      | 0      | 0      | 0      | 0      | 0      | 0      | 0      | 0      | 0      | 0      | 0      | 0      | 0      |
| Mobiluncus          | 1              | 41             | 0      | 0      | 0      | 0      | 0      | 0      | 0      | 0      | 0      | 0      | 0      | 0      | 0      | 0      | 0      | 0      | 0      | 0      |
| Modestobacter       | 1              | 43             | 0      | 0      | 0      | 0      | 0      | 0      | 0      | 0      | 0      | 0      | 0      | 0      | 0      | 0      | 0      | 0      | 0      | 0      |
| Moorea              | 1              | 2              | 0      | 0      | 0      | 0      | 0      | 0      | 0      | 0      | 0      | 0      | 0      | 0      | 0      | 0      | 0      | 0      | 0      | 0      |
| Moorella            | 2              | 69             | 0      | 0      | 0      | 0      | 0      | 0      | 0      | 0      | 0      | 0      | 0      | 0      | 0      | 0      | 0      | 0      | 0      | 0      |
| Moraxella           | 2              | 66             | 0      | 0      | 0      | 0      | 0      | 0      | 0      | 0      | 0      | 0      | 0      | 0      | 0      | 0      | 0      | 0      | 0      | 0      |
| Morganella          | 1              | 29             | 0      | 0      | 0      | 0      | 0      | 0      | 0      | 0      | 0      | 0      | 0      | 0      | 0      | 0      | 0      | 0      | 0      | 0      |
| Moritella           | 1              | 2              | 0      | 0      | 0      | 0      | 0      | 0      | 0      | 0      | 0      | 0      | 0      | 0      | 0      | 0      | 0      | 0      | 0      | 0      |
| Muricauda           | 1              | 23             | 0      | 0      | 0      | 0      | 0      | 0      | 0      | 0      | 0      | 0      | 0      | 0      | 0      | 0      | 0      | 0      | 0      | 0      |
| Mycobacterium       | 3              | 306            | 0      | 0      | 0      | 0      | 0      | 0      | 0      | 0      | 0      | 0      | 0      | 0      | 0      | 0      | 1      | 1      | 0      | 1      |
| Mycoplasma          | 1              | 53             | 0      | 0      | 0      | 0      | 0      | 0      | 0      | 0      | 0      | 0      | 0      | 0      | 0      | 0      | 0      | 0      | 0      | 0      |
| Myxococcus          | 2              | 110            | 0      | 0      | 0      | 0      | 0      | 0      | 0      | 0      | 0      | 0      | 0      | 0      | 0      | 0      | 0      | 0      | 0      | 1      |
| Nakamurella         | 2              | 115            | 0      | 0      | 0      | 0      | 0      | 0      | 0      | 0      | 0      | 0      | 0      | 0      | 0      | 0      | 0      | 0      | 0      | 0      |
| napthalene          | 1              | 2              | 0      | 0      | 0      | 0      | 0      | 0      | 0      | 0      | 0      | 0      | 0      | 0      | 0      | 0      | 0      | 0      | 0      | 0      |
| Natranaerobius      | 2              | 55             | 0      | 0      | 0      | 0      | 0      | 0      | 0      | 0      | 0      | 0      | 0      | 0      | 0      | 0      | 0      | 0      | 0      | 0      |
| Natrialba           | 1              | 16             | 0      | 0      | 0      | 0      | 0      | 0      | 0      | 0      | 0      | 0      | 0      | 0      | 0      | 0      | 0      | 0      | 0      | 0      |
| Natrinema           | 1              | 16             | 0      | 0      | 0      | 0      | 0      | 0      | 0      | 0      | 0      | 0      | 0      | 0      | 0      | 0      | 0      | 0      | 0      | 0      |
| Natronobacterium    | 1              | 11             | 0      | 0      | 0      | 0      | 0      | 0      | 0      | 0      | 0      | 0      | 0      | 0      | 0      | 0      | 0      | 0      | 0      | 0      |
| Natronococcus       | 1              | 21             | 0      | 0      | 0      | 0      | 0      | 0      | 0      | 0      | 0      | 1      | 0      | 0      | 0      | 0      | 0      | 0      | 0      | 0      |

| Genus             | Cluster Number | Protein Counts | K07538 | K07540 | K07543 | K07545 | K07546 | K07547 | K07549 | K07823 | K07824 | K08295 | K08686 | K08689 | K08690 | K08710 | K09461 | K10215 | K10216 | K10217 |
|-------------------|----------------|----------------|--------|--------|--------|--------|--------|--------|--------|--------|--------|--------|--------|--------|--------|--------|--------|--------|--------|--------|
| Natronomonas      | 1              | 20             | 0      | 0      | 0      | 0      | 0      | 0      | 0      | 0      | 0      | 0      | 0      | 0      | 0      | 0      | 0      | 0      | 0      | 0      |
| Nautilia          | 2              | 48             | 0      | 0      | 0      | 0      | 0      | 0      | 0      | 0      | 0      | 0      | 0      | 0      | 0      | 0      | 0      | 0      | 0      | 0      |
| Neisseria         | 2              | 67             | 0      | 0      | 0      | 0      | 0      | 0      | 0      | 0      | 0      | 0      | 0      | 0      | 0      | 0      | 0      | 0      | 0      | 0      |
| Neisseriaceae     | 1              | 1              | 0      | 0      | 0      | 0      | 0      | 0      | 0      | 0      | 0      | 0      | 0      | 0      | 0      | 0      | 0      | 0      | 0      | 0      |
| Neorickettsia     | 1              | 31             | 0      | 0      | 0      | 0      | 0      | 0      | 0      | 0      | 0      | 0      | 0      | 0      | 0      | 0      | 0      | 0      | 0      | 0      |
| Neptuniibacter    | 1              | 2              | 0      | 0      | 0      | 0      | 0      | 0      | 0      | 0      | 0      | 0      | 0      | 0      | 0      | 0      | 0      | 0      | 0      | 0      |
| Niastella         | 1              | 21             | 0      | 0      | 0      | 0      | 0      | 0      | 0      | 0      | 0      | 0      | 0      | 0      | 0      | 0      | 0      | 0      | 0      | 0      |
| Nitratifractor    | 2              | 54             | 0      | 0      | 0      | 0      | 0      | 0      | 0      | 0      | 0      | 0      | 0      | 0      | 0      | 0      | 0      | 0      | 0      | 0      |
| Nitratireductor   | 1              | 19             | 0      | 0      | 0      | 0      | 0      | 0      | 0      | 0      | 0      | 0      | 0      | 0      | 0      | 0      | 0      | 0      | 0      | 0      |
| Nitratiruptor     | 2              | 40             | 0      | 0      | 0      | 0      | 0      | 0      | 0      | 0      | 0      | 0      | 0      | 0      | 0      | 0      | 0      | 0      | 0      | 0      |
| Nitrobacter       | 2              | 99             | 0      | 0      | 0      | 0      | 0      | 0      | 0      | 0      | 0      | 0      | 0      | 0      | 0      | 0      | 0      | 0      | 0      | 0      |
| Nitrococcus       | 1              | 2              | 0      | 0      | 0      | 0      | 0      | 0      | 0      | 0      | 0      | 0      | 0      | 0      | 0      | 0      | 0      | 0      | 0      | 0      |
| Nitrosococcus     | 2              | 94             | 0      | 0      | 0      | 0      | 0      | 0      | 0      | 0      | 0      | 0      | 0      | 0      | 0      | 0      | 0      | 0      | 0      | 0      |
| Nitrosomonas      | 2              | 72             | 0      | 0      | 0      | 0      | 0      | 0      | 0      | 0      | 0      | 0      | 0      | 0      | 0      | 0      | 0      | 0      | 0      | 0      |
| Nitrosopumilaceae | 1              | 7              | 0      | 0      | 0      | 0      | 0      | 0      | 0      | 0      | 0      | 0      | 0      | 0      | 0      | 0      | 0      | 0      | 0      | 0      |
| Nitrosopumilus    | 1              | 11             | 0      | 0      | 0      | 0      | 0      | 0      | 0      | 0      | 0      | 0      | 0      | 0      | 0      | 0      | 0      | 0      | 0      | 0      |
| Nitrospira        | 2              | 74             | 0      | 0      | 0      | 0      | 0      | 0      | 0      | 0      | 0      | 0      | 0      | 0      | 0      | 0      | 0      | 0      | 0      | 0      |
| Nocardia          | 2              | 185            | 0      | 0      | 0      | 0      | 0      | 0      | 0      | 0      | 0      | 1      | 0      | 0      | 0      | 0      | 1      | 0      | 0      | 1      |
| Nocardioidaceae   | 1              | 2              | 0      | 0      | 0      | 0      | 0      | 0      | 0      | 0      | 0      | 0      | 0      | 0      | 0      | 0      | 0      | 0      | 0      | 0      |
| Nocardioides      | 2              | 157            | 0      | 0      | 0      | 0      | 0      | 0      | 0      | 0      | 0      | 0      | 0      | 0      | 0      | 1      | 0      | 0      | 0      | 0      |
| Nocardiopsis      | 2              | 102            | 0      | 0      | 0      | 0      | 0      | 0      | 0      | 0      | 0      | 1      | 0      | 0      | 0      | 0      | 1      | 0      | 0      | 0      |
| Nodularia         | 1              | 22             | 0      | 0      | 0      | 0      | 0      | 0      | 0      | 0      | 0      | 0      | 0      | 0      | 0      | 0      | 0      | 0      | 0      | 0      |
| Nonlabens         | 1              | 19             | 0      | 0      | 0      | 0      | 0      | 0      | 0      | 0      | 0      | 0      | 0      | 0      | 0      | 0      | 0      | 0      | 0      | 1      |
| Nostoc            | 2              | 111            | 0      | 0      | 0      | 0      | 0      | 0      | 0      | 0      | 0      | 0      | 0      | 0      | 0      | 0      | 0      | 0      | 0      | 0      |
| Nostocaceae       | 1              | 2              | 0      | 0      | 0      | 0      | 0      | 0      | 0      | 0      | 0      | 0      | 0      | 0      | 0      | 0      | 0      | 0      | 0      | 0      |
| Novosphingobium   | 2              | 169            | 0      | 0      | 0      | 0      | 0      | 0      | 0      | 1      | 0      | 0      | 0      | 0      | 0      | 0      | 0      | 0      | 0      | 1      |
| Oceanibaculum     | 1              | 3              | 0      | 0      | 0      | 0      | 0      | 0      | 0      | 0      | 0      | 0      | 0      | 0      | 0      | 0      | 0      | 0      | 0      | 0      |
| Oceanibulbus      | 1              | 12             | 0      | 0      | 0      | 0      | 0      | 0      | 0      | 0      | 0      | 0      | 0      | 0      | 0      | 0      | 0      | 0      | 0      | 0      |
| Oceanicola        | 1              | 9              | 0      | 0      | 0      | 0      | 0      | 0      | 0      | 0      | 0      | 0      | 0      | 0      | 0      | 0      | 0      | 0      | 0      | 0      |
| Oceanimonas       | 1              | 33             | 0      | 0      | 0      | 0      | 0      | 0      | 0      | 0      | 0      | 0      | 0      | 0      | 0      | 0      | 0      | 0      | 0      | 0      |
| Oceaniovalibus    | 1              | 2              | 0      | 0      | 0      | 0      | 0      | 0      | 0      | 0      | 0      | 0      | 0      | 0      | 0      | 0      | 0      | 0      | 0      | 0      |
| Oceanithermus     | 2              | 72             | 0      | 0      | 0      | 0      | 0      | 0      | 0      | 0      | 0      | 0      | 0      | 0      | 0      | 0      | 0      | 0      | 0      | 0      |
| Oceanobacillus    | 2              | 91             | 0      | 0      | 0      | 0      | 0      | 0      | 0      | 0      | 0      | 0      | 0      | 0      | 0      | 0      | 0      | 0      | 0      | 0      |
| Oceanospirillum   | 1              | 2              | 0      | 0      | 0      | 0      | 0      | 0      | 0      | 0      | 0      | 0      | 0      | 0      | 0      | 0      | 0      | 0      | 0      | 0      |
| Ochrobactrum      | 2              | 133            | 0      | 0      | 0      | 0      | 0      | 0      | 0      | 0      | 0      | 1      | 0      | 0      | 0      | 0      | 1      | 0      | 0      | 0      |
| Octadecabacter    | 1              | 29             | 0      | 0      | 0      | 0      | 0      | 0      | 0      | 0      | 0      | 0      | 0      | 0      | 0      | 0      | 0      | 0      | 0      | 0      |
| Oenococcus        | 2              | 41             | 0      | 0      | 0      | 0      | 0      | 0      | 0      | 0      | 0      | 0      | 0      | 0      | 0      | 0      | 0      | 0      | 0      | 0      |
| Oleomonas         | 1              | 2              | 0      | 0      | 0      | 0      | 0      | 0      | 0      | 0      | 0      | 0      | 0      | 0      | 0      | 0      | 0      | 0      | 0      | 0      |
| Oligotropha       | 3              | 87             | 0      | 0      | 0      | 0      | 0      | 0      | 0      | 0      | 0      | 0      | 0      | 0      | 0      | 0      | 0      | 0      | 0      | 0      |
| Olsenella         | 2              | 40             | 0      | 0      | 0      | 0      | 0      | 0      | 0      | 0      | 0      | 0      | 0      | 0      | 0      | 0      | 0      | 0      | 0      | 0      |
| Opitutus          | 2              | 67             | 0      | 0      | 0      | 0      | 0      | 0      | 0      | 0      | 0      | 0      | 0      | 0      | 0      | 0      | 0      | 0      | 0      | 0      |
| Orientia          | 1              | 21             | 0      | 0      | 0      | 0      | 0      | 0      | 0      | 0      | 0      | 0      | 0      | 0      | 0      | 0      | 0      | 0      | 0      | 0      |
| Ornithobacterium  | 1              | 11             | 0      | 0      | 0      | 0      | 0      | 0      | 0      | 0      | 0      | 0      | 0      | 0      | 0      | 0      | 0      | 0      | 0      | 0      |
| Oscillatoria      | 1              | 16             | 0      | 0      | 0      | 0      | 0      | 0      | 0      | 0      | 0      | 0      | 0      | 0      | 0      | 0      | 0      | 0      | 0      | 0      |
| Oscillatoriales   | 1              | 2              | 0      | 0      | 0      | 0      | 0      | 0      | 0      | 0      | 0      | 0      | 0      | 0      | 0      | 0      | 0      | 0      | 0      | 0      |
| Oscillibacter     | 1              | 20             | 0      | 0      | 0      | 0      | 0      | 0      | 0      | 0      | 0      | 0      | 0      | 0      | 0      | 0      | 0      | 0      | 0      | 0      |
| Owenweeksia       | 1              | 15             | 0      | 0      | 0      | 0      | 0      | 0      | 0      | 0      | 0      | 0      | 0      | 0      | 0      | 0      | 0      | 0      | 0      | 1      |
| Oxalobacteraceae  | 1              | 4              | 0      | 0      | 0      | 0      | 0      | 0      | 0      | 0      | 0      | 0      | 0      | 0      | 0      | 0      | 0      | 0      | 0      | 0      |
| Paenibacillus     | 2              | 152            | 0      | 0      | 0      | 0      | 0      | 0      | 0      | 0      | 0      | 0      | 0      | 0      | 0      | 0      | 0      | 0      | 0      | 0      |
| Paludibacter      | 2              | 67             | 0      | 0      | 0      | 0      | 0      | 0      | 0      | 0      | 0      | 0      | 0      | 0      | 0      | 0      | 0      | 0      | 0      | 0      |
| Pandoraea         | 1              | 18             | 0      | 0      | 0      | 0      | 0      | 0      | 0      | 0      | 0      | 0      | 0      | 0      | 0      | 0      | 0      | 0      | 0      | 0      |
| Pannonibacter     | 1              | 3              | 0      | 0      | 0      | 0      | 0      | 0      | 0      | 0      | 0      | 0      | 0      | 0      | 0      | 0      | 0      | 0      | 0      | 0      |

| Genus              | Cluster Number | Protein Counts | K07538 | K07540 | K07543 | K07545 | K07546 | K07547 | K07549 | K07823 | K07824 | K08295 | K08686 | K08689 | K08690 | K08710 | K09461 | K10215 | K10216 | K10217 |
|--------------------|----------------|----------------|--------|--------|--------|--------|--------|--------|--------|--------|--------|--------|--------|--------|--------|--------|--------|--------|--------|--------|
| Pantholops         | 1              | 23             | 0      | 0      | 0      | 0      | 0      | 0      | 0      | 0      | 0      | 0      | 0      | 0      | 0      | 0      | 0      | 0      | 0      | 0      |
| Pantoea            | 2              | 181            | 0      | 0      | 0      | 0      | 0      | 0      | 0      | 0      | 0      | 0      | 0      | 0      | 0      | 0      | 0      | 0      | 0      | 0      |
| Parabacteroides    | 2              | 64             | 0      | 0      | 0      | 0      | 0      | 0      | 0      | 0      | 0      | 0      | 0      | 0      | 0      | 0      | 0      | 0      | 0      | 0      |
| Parachlamydia      | 1              | 11             | 0      | 0      | 0      | 0      | 0      | 0      | 0      | 0      | 0      | 0      | 0      | 0      | 0      | 0      | 0      | 0      | 0      | 0      |
| Paracoccus         | 2              | 169            | 0      | 0      | 0      | 0      | 0      | 0      | 0      | 0      | 0      | 1      | 0      | 0      | 0      | 1      | 1      | 0      | 0      | 0      |
| Parvibaculum       | 3              | 117            | 0      | 0      | 0      | 0      | 0      | 0      | 0      | 0      | 0      | 0      | 0      | 0      | 0      | 0      | 0      | 0      | 0      | 0      |
| Parvularcula       | 2              | 72             | 0      | 0      | 0      | 0      | 0      | 0      | 0      | 0      | 0      | 0      | 0      | 0      | 0      | 0      | 0      | 0      | 0      | 0      |
| Pasteurella        | 2              | 85             | 0      | 0      | 0      | 0      | 0      | 0      | 0      | 0      | 0      | 0      | 0      | 0      | 0      | 0      | 0      | 0      | 0      | 0      |
| Pasteurellaceae    | 1              | 2              | 0      | 0      | 0      | 0      | 0      | 0      | 0      | 0      | 0      | 0      | 0      | 0      | 0      | 0      | 0      | 0      | 0      | 0      |
| Pectobacterium     | 1              | 44             | 0      | 0      | 0      | 0      | 0      | 0      | 0      | 0      | 0      | 0      | 0      | 0      | 0      | 0      | 0      | 0      | 0      | 0      |
| Pediococcus        | 1              | 43             | 0      | 0      | 0      | 0      | 0      | 0      | 0      | 0      | 0      | 0      | 0      | 0      | 0      | 0      | 0      | 0      | 0      | 0      |
| Pedobacter         | 2              | 88             | 0      | 0      | 0      | 0      | 0      | 0      | 0      | 0      | 0      | 0      | 0      | 0      | 0      | 0      | 0      | 0      | 0      | 0      |
| Pelagibaca         | 1              | 10             | 0      | 0      | 0      | 0      | 0      | 0      | 0      | 0      | 0      | 0      | 0      | 0      | 0      | 0      | 0      | 0      | 0      | 0      |
| Pelagibacterium    | 1              | 39             | 0      | 0      | 0      | 0      | 0      | 0      | 0      | 0      | 0      | 0      | 0      | 0      | 0      | 0      | 0      | 0      | 0      | 0      |
| Pelobacter         | 2              | 85             | 0      | 0      | 0      | 0      | 0      | 0      | 0      | 0      | 0      | 0      | 0      | 0      | 0      | 0      | 0      | 0      | 0      | 0      |
| Pelodictyon        | 2              | 62             | 0      | 0      | 0      | 0      | 0      | 0      | 0      | 0      | 0      | 0      | 0      | 0      | 0      | 0      | 0      | 0      | 0      | 0      |
| Pelosinus          | 1              | 1              | 0      | 0      | 0      | 0      | 0      | 0      | 0      | 0      | 0      | 0      | 0      | 0      | 0      | 0      | 0      | 0      | 0      | 0      |
| Pelotomaculum      | 2              | 60             | 0      | 0      | 0      | 0      | 0      | 0      | 0      | 0      | 0      | 0      | 0      | 0      | 0      | 0      | 0      | 0      | 0      | 0      |
| Peptostreptococcus | 1              | 1              | 0      | 0      | 0      | 0      | 0      | 0      | 0      | 0      | 0      | 0      | 0      | 0      | 0      | 0      | 0      | 0      | 0      | 0      |
| Persephonella      | 2              | 55             | 0      | 0      | 0      | 0      | 0      | 0      | 0      | 0      | 0      | 0      | 0      | 0      | 0      | 0      | 0      | 0      | 0      | 0      |
| Petrotoga          | 2              | 72             | 0      | 0      | 0      | 0      | 0      | 0      | 0      | 0      | 0      | 0      | 0      | 0      | 0      | 0      | 0      | 0      | 0      | 0      |
| Phaeobacter        | 2              | 55             | 0      | 0      | 0      | 0      | 0      | 0      | 0      | 0      | 0      | 1      | 0      | 0      | 0      | 0      | 1      | 0      | 0      | 0      |
| Phenylobacterium   | 3              | 103            | 0      | 0      | 0      | 0      | 0      | 0      | 0      | 0      | 0      | 0      | 0      | 0      | 0      | 0      | 0      | 0      | 0      | 0      |
| Photobacterium     | 2              | 119            | 0      | 0      | 0      | 0      | 0      | 0      | 0      | 0      | 0      | 0      | 0      | 0      | 0      | 0      | 0      | 0      | 0      | 0      |
| Photorhabdus       | 2              | 149            | 0      | 0      | 0      | 0      | 0      | 0      | 0      | 0      | 0      | 0      | 0      | 0      | 0      | 0      | 0      | 0      | 0      | 0      |
| Phycisphaera       | 1              | 9              | 0      | 0      | 0      | 0      | 0      | 0      | 0      | 0      | 0      | 0      | 0      | 0      | 0      | 0      | 0      | 0      | 0      | 0      |
| Phyllobacterium    | 1              | 6              | 0      | 0      | 0      | 0      | 0      | 0      | 0      | 0      | 0      | 0      | 0      | 0      | 0      | 0      | 0      | 0      | 0      | 0      |
| Picrophilus        | 1              | 15             | 0      | 0      | 0      | 0      | 0      | 0      | 0      | 0      | 0      | 0      | 0      | 0      | 0      | 0      | 0      | 0      | 0      | 0      |
| Pirellula          | 2              | 85             | 0      | 0      | 0      | 0      | 0      | 0      | 0      | 0      | 0      | 0      | 0      | 0      | 0      | 0      | 0      | 0      | 0      | 0      |
| Planctomyces       | 2              | 93             | 0      | 0      | 0      | 0      | 0      | 0      | 0      | 0      | 0      | 0      | 0      | 0      | 0      | 0      | 0      | 0      | 0      | 0      |
| Plautia            | 1              | 17             | 0      | 0      | 0      | 0      | 0      | 0      | 0      | 0      | 0      | 0      | 0      | 0      | 0      | 0      | 0      | 0      | 0      | 0      |
| Plesiomonas        | 1              | 4              | 0      | 0      | 0      | 0      | 0      | 0      | 0      | 0      | 0      | 0      | 0      | 0      | 0      | 0      | 0      | 0      | 0      | 0      |
| Pleurocapsa        | 1              | 23             | 0      | 0      | 0      | 0      | 0      | 0      | 0      | 0      | 0      | 0      | 0      | 0      | 0      | 0      | 0      | 0      | 0      | 0      |
| Polaribacter       | 2              | 74             | 0      | 0      | 0      | 0      | 0      | 0      | 0      | 0      | 0      | 0      | 0      | 0      | 0      | 0      | 0      | 0      | 0      | 1      |
| Polaromonas        | 3              | 238            | 0      | 0      | 0      | 0      | 0      | 0      | 0      | 0      | 0      | 1      | 0      | 1      | 1      | 0      | 1      | 0      | 0      | 1      |
| Polymorphum        | 3              | 173            | 0      | 0      | 0      | 0      | 0      | 0      | 0      | 0      | 0      | 1      | 0      | 1      | 0      | 0      | 1      | 0      | 0      | 0      |
| Polynucleobacter   | 1              | 19             | 0      | 0      | 0      | 0      | 0      | 0      | 0      | 0      | 0      | 0      | 0      | 0      | 0      | 0      | 0      | 0      | 0      | 0      |
| Ponticaulis        | 1              | 1              | 0      | 0      | 0      | 0      | 0      | 0      | 0      | 0      | 0      | 0      | 0      | 0      | 0      | 0      | 0      | 0      | 0      | 0      |
| Porphyromonas      | 2              | 63             | 0      | 0      | 0      | 0      | 0      | 0      | 0      | 0      | 0      | 0      | 0      | 0      | 0      | 0      | 0      | 0      | 0      | 0      |
| Prevotella         | 1              | 65             | 0      | 0      | 0      | 0      | 0      | 0      | 0      | 0      | 0      | 0      | 0      | 0      | 0      | 0      | 0      | 0      | 0      | 0      |
| Prochlorococcus    | 2              | 68             | 0      | 0      | 0      | 0      | 0      | 0      | 0      | 0      | 0      | 0      | 0      | 0      | 0      | 0      | 0      | 0      | 0      | 0      |
| Propionibacterium  | 1              | 62             | 0      | 0      | 0      | 0      | 0      | 0      | 0      | 0      | 0      | 0      | 0      | 0      | 0      | 0      | 0      | 0      | 0      | 0      |
| Prosthecochloris   | 1              | 16             | 0      | 0      | 0      | 0      | 0      | 0      | 0      | 0      | 0      | 0      | 0      | 0      | 0      | 0      | 0      | 0      | 0      | 0      |
| Proteobacteria     | 1              | 19             | 0      | 0      | 0      | 0      | 0      | 0      | 0      | 0      | 0      | 0      | 0      | 0      | 0      | 0      | 0      | 0      | 0      | 0      |
| Proteus            | 2              | 113            | 0      | 0      | 0      | 0      | 0      | 0      | 0      | 0      | 0      | 0      | 0      | 0      | 0      | 0      | 0      | 0      | 0      | 0      |
| Providencia        | 1              | 38             | 0      | 0      | 0      | 0      | 0      | 0      | 0      | 0      | 0      | 0      | 0      | 0      | 0      | 0      | 0      | 0      | 0      | 0      |
| Pseudaminobacter   | 1              | 10             | 0      | 0      | 0      | 0      | 0      | 0      | 0      | 0      | 0      | 0      | 0      | 0      | 0      | 0      | 0      | 0      | 0      | 0      |
| Pseudanabaena      | 1              | 11             | 0      | 0      | 0      | 0      | 0      | 0      | 0      | 0      | 0      | 0      | 0      | 0      | 0      | 0      | 0      | 0      | 0      | 0      |
| Pseudoalteromonas  | 2              | 188            | 0      | 0      | 0      | 0      | 0      | 0      | 0      | 0      | 0      | 0      | 0      | 0      | 0      | 0      | 0      | 0      | 0      | 0      |
| Pseudochrobactrum  | 1              | 7              | 0      | 0      | 0      | 0      | 0      | 0      | 0      | 0      | 0      | 0      | 0      | 0      | 0      | 0      | 0      | 0      | 0      | 0      |
| Pseudogulbenkiania | 1              | 40             | 0      | 0      | 0      | 0      | 0      | 0      | 0      | 0      | 0      | 0      | 0      | 0      | 0      | 0      | 0      | 0      | 0      | 0      |
| pseudomallei       | 3              | 131            | 0      | 0      | 0      | 0      | 0      | 0      | 0      | 0      | 0      | 0      | 0      | 0      | 0      | 0      | 0      | 0      | 0      | 0      |

| Genus                   | Cluster Number | Protein Counts | K07538 | K07540 | K07543 | K07545 | K07546 | K07547 | K07549 | K07823 | K07824 | K08295 | K08686 | K08689 | K08690 | K08710 | K09461 | K10215 | K10216 | K10217 |
|-------------------------|----------------|----------------|--------|--------|--------|--------|--------|--------|--------|--------|--------|--------|--------|--------|--------|--------|--------|--------|--------|--------|
| Pseudomonas             | 3              | 381            | 0      | 0      | 0      | 0      | 0      | 0      | 0      | 1      | 0      | 0      | 0      | 1      | 1      | 1      | 0      | 0      | 1      | 1      |
| Pseudonocardia          | 3              | 180            | 0      | 0      | 0      | 0      | 0      | 0      | 0      | 0      | 0      | 1      | 0      | 0      | 0      | 0      | 1      | 0      | 0      | 1      |
| Pseudorhodobacter       | 1              | 4              | 0      | 0      | 0      | 0      | 0      | 0      | 0      | 0      | 0      | 0      | 0      | 0      | 0      | 0      | 0      | 0      | 0      | 0      |
| Pseudovibrio            | 1              | 33             | 0      | 0      | 0      | 0      | 0      | 0      | 0      | 0      | 0      | 1      | 0      | 0      | 0      | 0      | 1      | 0      | 0      | 0      |
| Pseudoxanthomonas       | 2              | 124            | 0      | 0      | 0      | 0      | 0      | 0      | 0      | 0      | 0      | 0      | 0      | 1      | 1      | 0      | 0      | 0      | 0      | 1      |
| Psychrobacter           | 2              | 124            | 0      | 0      | 0      | 0      | 0      | 0      | 0      | 0      | 0      | 0      | 0      | 0      | 0      | 0      | 0      | 0      | 0      | 0      |
| Psychroflexus           | 1              | 22             | 0      | 0      | 0      | 0      | 0      | 0      | 0      | 0      | 0      | 0      | 0      | 0      | 0      | 0      | 0      | 0      | 0      | 0      |
| Psychromonas            | 2              | 110            | 0      | 0      | 0      | 0      | 0      | 0      | 0      | 0      | 0      | 0      | 0      | 0      | 0      | 0      | 0      | 0      | 0      | 0      |
| Pusillimonas            | 3              | 111            | 0      | 0      | 0      | 0      | 0      | 0      | 0      | 0      | 0      | 1      | 0      | 0      | 0      | 0      | 1      | 0      | 0      | 1      |
| Pyrobaculum             | 1              | 15             | 0      | 0      | 0      | 0      | 0      | 0      | 0      | 0      | 0      | 0      | 0      | 0      | 0      | 0      | 0      | 0      | 0      | 0      |
| Pyrococcus              | 1              | 10             | 0      | 0      | 0      | 0      | 0      | 0      | 0      | 0      | 0      | 0      | 0      | 0      | 0      | 0      | 0      | 0      | 0      | 0      |
| Pyrolobus               | 1              | 4              | 0      | 0      | 0      | 0      | 0      | 0      | 0      | 0      | 0      | 0      | 0      | 0      | 0      | 0      | 0      | 0      | 0      | 0      |
| Rahnella                | 2              | 143            | 0      | 0      | 0      | 0      | 0      | 0      | 0      | 0      | 0      | 0      | 0      | 0      | 0      | 0      | 0      | 0      | 0      | 0      |
| Ralstonia               | 3              | 332            | 0      | 0      | 0      | 0      | 0      | 0      | 0      | 0      | 0      | 1      | 0      | 0      | 0      | 0      | 1      | 0      | 1      | 1      |
| Ramlibacter             | 1              | 35             | 0      | 0      | 0      | 0      | 0      | 0      | 0      | 0      | 0      | 1      | 0      | 0      | 0      | 0      | 1      | 0      | 0      | 0      |
| Raoultella              | 2              | 139            | 0      | 0      | 0      | 0      | 0      | 0      | 0      | 0      | 0      | 0      | 0      | 0      | 0      | 0      | 0      | 0      | 0      | 0      |
| Raphidiopsis            | 1              | 5              | 0      | 0      | 0      | 0      | 0      | 0      | 0      | 0      | 0      | 0      | 0      | 0      | 0      | 0      | 0      | 0      | 0      | 0      |
| Reinekea                | 1              | 2              | 0      | 0      | 0      | 0      | 0      | 0      | 0      | 0      | 0      | 0      | 0      | 0      | 0      | 0      | 0      | 0      | 0      | 0      |
| Renibacterium           | 2              | 67             | 0      | 0      | 0      | 0      | 0      | 0      | 0      | 0      | 0      | 0      | 0      | 0      | 0      | 0      | 0      | 0      | 0      | 0      |
| Rhizobiaceae            | 1              | 3              | 0      | 0      | 0      | 0      | 0      | 0      | 0      | 0      | 0      | 0      | 0      | 0      | 0      | 0      | 0      | 0      | 0      | 0      |
| Rhizobiales             | 1              | 6              | 0      | 0      | 0      | 0      | 0      | 0      | 0      | 0      | 0      | 0      | 0      | 0      | 0      | 0      | 0      | 0      | 0      | 0      |
| Rhizobium               | 3              | 257            | 0      | 0      | 0      | 0      | 0      | 0      | 0      | 0      | 0      | 1      | 0      | 0      | 0      | 0      | 1      | 0      | 0      | 1      |
| Rhizobium/Agrobacterium | 2              | 87             | 0      | 0      | 0      | 0      | 0      | 0      | 0      | 0      | 0      | 0      | 0      | 0      | 0      | 0      | 0      | 0      | 0      | 1      |
| Rhodanobacter           | 1              | 21             | 0      | 0      | 0      | 0      | 0      | 0      | 0      | 1      | 0      | 0      | 0      | 0      | 0      | 0      | 0      | 0      | 0      | 1      |
| Rhodobacter             | 3              | 175            | 0      | 0      | 0      | 0      | 0      | 0      | 0      | 0      | 0      | 0      | 0      | 0      | 0      | 0      | 0      | 0      | 0      | 0      |
| Rhodobacteraceae        | 1              | 21             | 0      | 0      | 0      | 0      | 0      | 0      | 0      | 0      | 0      | 0      | 0      | 0      | 0      | 0      | 0      | 0      | 0      | 0      |
| Rhodobacterales         | 1              | 34             | 0      | 0      | 0      | 0      | 0      | 0      | 0      | 0      | 0      | 0      | 0      | 0      | 0      | 0      | 0      | 0      | 0      | 0      |
| Rhodococcus             | 2              | 292            | 0      | 0      | 0      | 0      | 0      | 0      | 0      | 0      | 0      | 0      | 0      | 1      | 1      | 0      | 0      | 0      | 0      | 1      |
| Rhodocyclaceae          | 1              | 7              | 0      | 0      | 0      | 0      | 0      | 0      | 0      | 0      | 0      | 0      | 0      | 0      | 0      | 0      | 0      | 0      | 0      | 0      |
| Rhodoferax              | 3              | 144            | 0      | 0      | 0      | 0      | 0      | 0      | 0      | 0      | 0      | 0      | 0      | 0      | 0      | 0      | 0      | 0      | 0      | 0      |
| Rhodomicrobium          | 2              | 103            | 1      | 0      | 0      | 0      | 0      | 0      | 0      | 0      | 0      | 0      | 0      | 0      | 0      | 0      | 0      | 0      | 0      | 0      |
| Rhodopirellula          | 2              | 87             | 0      | 0      | 0      | 0      | 0      | 0      | 0      | 0      | 0      | 0      | 0      | 0      | 0      | 0      | 0      | 0      | 0      | 0      |
| Rhodopseudomonas        | 3              | 246            | 0      | 0      | 0      | 0      | 0      | 0      | 0      | 1      | 0      | 1      | 0      | 0      | 0      | 0      | 1      | 0      | 0      | 0      |
| Rhodospirillum          | 2              | 121            | 0      | 0      | 0      | 0      | 0      | 0      | 0      | 0      | 0      | 0      | 0      | 0      | 0      | 0      | 0      | 0      | 0      | 0      |
| Rhodothermus            | 2              | 76             | 0      | 0      | 0      | 0      | 0      | 0      | 0      | 0      | 0      | 0      | 0      | 0      | 0      | 0      | 0      | 0      | 0      | 0      |
| Rhodovulum              | 1              | 4              | 0      | 0      | 0      | 0      | 0      | 0      | 0      | 0      | 0      | 0      | 0      | 0      | 0      | 0      | 0      | 0      | 0      | 0      |
| Richelia                | 1              | 2              | 0      | 0      | 0      | 0      | 0      | 0      | 0      | 0      | 0      | 0      | 0      | 0      | 0      | 0      | 0      | 0      | 0      | 0      |
| Rickettsia              | 2              | 43             | 0      | 0      | 0      | 0      | 0      | 0      | 0      | 0      | 0      | 0      | 0      | 0      | 0      | 0      | 0      | 0      | 0      | 0      |
| Rickettsiaceae          | 1              | 5              | 0      | 0      | 0      | 0      | 0      | 0      | 0      | 0      | 0      | 0      | 0      | 0      | 0      | 0      | 0      | 0      | 0      | 0      |
| Riemerella              | 2              | 61             | 0      | 0      | 0      | 0      | 0      | 0      | 0      | 0      | 0      | 0      | 0      | 0      | 0      | 0      | 0      | 0      | 0      | 0      |
| Rivularia               | 1              | 18             | 0      | 0      | 0      | 0      | 0      | 0      | 0      | 0      | 0      | 0      | 0      | 0      | 0      | 0      | 0      | 0      | 0      | 0      |
| Robiginitalea           | 2              | 83             | 0      | 0      | 0      | 0      | 0      | 0      | 0      | 0      | 0      | 0      | 0      | 0      | 0      | 0      | 0      | 0      | 0      | 0      |
| Roseburia               | 2              | 58             | 0      | 0      | 0      | 0      | 0      | 0      | 0      | 0      | 0      | 0      | 0      | 0      | 0      | 0      | 0      | 0      | 0      | 0      |
| Roseibium               | 1              | 3              | 0      | 0      | 0      | 0      | 0      | 0      | 0      | 0      | 0      | 0      | 0      | 0      | 0      | 0      | 0      | 0      | 0      | 0      |
| Roseiflexus             | 3              | 100            | 0      | 0      | 0      | 0      | 0      | 0      | 0      | 0      | 0      | 0      | 0      | 0      | 0      | 0      | 0      | 0      | 0      | 1      |
| Roseobacter             | 2              | 149            | 0      | 0      | 0      | 0      | 0      | 0      | 0      | 0      | 0      | 0      | 0      | 0      | 0      | 0      | 0      | 0      | 0      | 0      |
| Roseomonas              | 1              | 2              | 0      | 0      | 0      | 0      | 0      | 0      | 0      | 0      | 0      | 0      | 0      | 0      | 0      | 0      | 0      | 0      | 0      | 0      |
| Roseovarius             | 1              | 15             | 0      | 0      | 0      | 0      | 0      | 0      | 0      | 0      | 0      | 0      | 0      | 0      | 0      | 0      | 0      | 0      | 0      | 0      |
| Rothia                  | 1              | 44             | 0      | 0      | 0      | 0      | 0      | 0      | 0      | 0      | 0      | 0      | 0      | 0      | 0      | 0      | 0      | 0      | 0      | 0      |
| Rubrivivax              | 1              | 24             | 0      | 0      | 0      | 0      | 0      | 0      | 0      | 0      | 0      | 0      | 0      | 0      | 0      | 0      | 0      | 0      | 0      | 0      |
| Rubrobacter             | 3              | 117            | 0      | 0      | 0      | 0      | 0      | 0      | 0      | 0      | 0      | 1      | 0      | 0      | 0      | 0      | 1      | 0      | 0      | 0      |
| Ruegeria                | 2              | 189            | 0      | 0      | 0      | 0      | 0      | 0      | 0      | 0      | 0      | 1      | 0      | 0      | 0      | 0      | 1      | 0      | 0      | 0      |

| Genus             | Cluster Number | Protein Counts | K07538 | K07540 | K07543 | K07545 | K07546 | K07547 | K07549 | K07823 | K07824 | K08295 | K08686 | K08689 | K08690 | K08710 | K09461 | K10215 | K10216 | K10217 |
|-------------------|----------------|----------------|--------|--------|--------|--------|--------|--------|--------|--------|--------|--------|--------|--------|--------|--------|--------|--------|--------|--------|
| Ruminococcaceae   | 1              | 2              | 0      | 0      | 0      | 0      | 0      | 0      | 0      | 0      | 0      | 0      | 0      | 0      | 0      | 0      | 0      | 0      | 0      | 0      |
| Ruminococcus      | 2              | 101            | 0      | 0      | 0      | 0      | 0      | 0      | 0      | 0      | 0      | 0      | 0      | 0      | 0      | 0      | 0      | 0      | 0      | 0      |
| Runella           | 1              | 26             | 0      | 0      | 0      | 0      | 0      | 0      | 0      | 0      | 0      | 0      | 0      | 0      | 0      | 0      | 0      | 0      | 0      | 0      |
| Saccharomonospora | 2              | 132            | 0      | 0      | 0      | 0      | 0      | 0      | 0      | 0      | 0      | 0      | 0      | 0      | 0      | 0      | 0      | 0      | 0      | 0      |
| Saccharophagus    | 2              | 81             | 0      | 0      | 0      | 0      | 0      | 0      | 0      | 0      | 0      | 0      | 0      | 0      | 0      | 0      | 0      | 0      | 0      | 0      |
| Saccharopolyspora | 3              | 194            | 0      | 0      | 0      | 0      | 0      | 0      | 0      | 0      | 0      | 1      | 0      | 0      | 0      | 0      | 1      | 0      | 0      | 0      |
| Saccharothrix     | 1              | 32             | 0      | 0      | 0      | 0      | 0      | 0      | 0      | 0      | 0      | 1      | 0      | 0      | 0      | 0      | 1      | 0      | 0      | 0      |
| Sagittula         | 1              | 10             | 0      | 0      | 0      | 0      | 0      | 0      | 0      | 0      | 0      | 0      | 0      | 0      | 0      | 0      | 0      | 0      | 0      | 0      |
| Salinibacter      | 2              | 77             | 0      | 0      | 0      | 0      | 0      | 0      | 0      | 0      | 0      | 0      | 0      | 0      | 0      | 0      | 0      | 0      | 0      | 0      |
| Salinimonas       | 1              | 1              | 0      | 0      | 0      | 0      | 0      | 0      | 0      | 0      | 0      | 0      | 0      | 0      | 0      | 0      | 0      | 0      | 0      | 0      |
| Salinispora       | 3              | 127            | 0      | 0      | 0      | 0      | 0      | 0      | 0      | 0      | 0      | 0      | 0      | 0      | 0      | 0      | 0      | 0      | 0      | 1      |
| Salinivibrio      | 1              | 2              | 0      | 0      | 0      | 0      | 0      | 0      | 0      | 0      | 0      | 0      | 0      | 0      | 0      | 0      | 0      | 0      | 0      | 0      |
| Salmonella        | 2              | 151            | 0      | 0      | 0      | 0      | 0      | 0      | 0      | 0      | 0      | 0      | 0      | 0      | 0      | 0      | 0      | 0      | 0      | 0      |
| Sanguibacter      | 2              | 73             | 0      | 0      | 0      | 0      | 0      | 0      | 0      | 0      | 0      | 0      | 0      | 0      | 0      | 0      | 0      | 0      | 0      | 0      |
| Saprospira        | 1              | 13             | 0      | 0      | 0      | 0      | 0      | 0      | 0      | 0      | 0      | 0      | 0      | 0      | 0      | 0      | 0      | 0      | 0      | 0      |
| Scardovia         | 1              | 1              | 0      | 0      | 0      | 0      | 0      | 0      | 0      | 0      | 0      | 0      | 0      | 0      | 0      | 0      | 0      | 0      | 0      | 0      |
| Scytonema         | 1              | 10             | 0      | 0      | 0      | 0      | 0      | 0      | 0      | 0      | 0      | 0      | 0      | 0      | 0      | 0      | 0      | 0      | 0      | 0      |
| Sebaldella        | 2              | 69             | 0      | 0      | 0      | 0      | 0      | 0      | 0      | 0      | 0      | 0      | 0      | 0      | 0      | 0      | 0      | 0      | 0      | 0      |
| Segniliparus      | 2              | 85             | 0      | 0      | 0      | 0      | 0      | 0      | 0      | 0      | 0      | 0      | 0      | 0      | 0      | 0      | 0      | 0      | 0      | 0      |
| Selenomonas       | 2              | 57             | 0      | 0      | 0      | 0      | 0      | 0      | 0      | 0      | 0      | 0      | 0      | 0      | 0      | 0      | 0      | 0      | 0      | 0      |
| Serinicoccus      | 1              | 1              | 0      | 0      | 0      | 0      | 0      | 0      | 0      | 0      | 0      | 0      | 0      | 0      | 0      | 0      | 0      | 0      | 0      | 0      |
| Serratia          | 2              | 186            | 0      | 0      | 0      | 0      | 0      | 0      | 0      | 0      | 0      | 0      | 0      | 0      | 0      | 0      | 0      | 0      | 0      | 0      |
| Shewanella        | 3              | 214            | 0      | 0      | 0      | 0      | 0      | 0      | 0      | 0      | 0      | 0      | 0      | 0      | 0      | 0      | 0      | 0      | 0      | 1      |
| Shigella          | 2              | 172            | 0      | 0      | 0      | 0      | 0      | 0      | 0      | 0      | 0      | 0      | 0      | 0      | 0      | 0      | 0      | 0      | 0      | 0      |
| Shinella          | 1              | 2              | 0      | 0      | 0      | 0      | 0      | 0      | 0      | 0      | 0      | 0      | 0      | 0      | 0      | 0      | 0      | 0      | 0      | 0      |
| Sideroxydans      | 2              | 81             | 0      | 0      | 0      | 0      | 0      | 0      | 0      | 0      | 0      | 0      | 0      | 0      | 0      | 0      | 0      | 0      | 0      | 0      |
| Silicibacter      | 2              | 105            | 0      | 0      | 0      | 0      | 0      | 0      | 0      | 0      | 0      | 1      | 0      | 0      | 0      | 0      | 1      | 0      | 0      | 0      |
| Simiduia          | 1              | 18             | 0      | 0      | 0      | 0      | 0      | 0      | 0      | 0      | 0      | 0      | 0      | 0      | 0      | 0      | 0      | 0      | 0      | 0      |
| Simkania          | 1              | 6              | 0      | 0      | 0      | 0      | 0      | 0      | 0      | 0      | 0      | 0      | 0      | 0      | 0      | 0      | 0      | 0      | 0      | 0      |
| Simonsiella       | 1              | 2              | 0      | 0      | 0      | 0      | 0      | 0      | 0      | 0      | 0      | 0      | 0      | 0      | 0      | 0      | 0      | 0      | 0      | 0      |
| Singulisphaera    | 1              | 18             | 0      | 0      | 0      | 0      | 0      | 0      | 0      | 0      | 0      | 0      | 0      | 0      | 0      | 0      | 0      | 0      | 0      | 0      |
| Sinorhizobium     | 3              | 207            | 0      | 0      | 0      | 0      | 0      | 0      | 0      | 0      | 0      | 0      | 0      | 0      | 0      | 0      | 0      | 0      | 0      | 0      |
| Slackia           | 2              | 46             | 0      | 0      | 0      | 0      | 0      | 0      | 0      | 0      | 0      | 0      | 0      | 0      | 0      | 0      | 0      | 0      | 0      | 0      |
| Smaragdicooccus   | 1              | 3              | 0      | 0      | 0      | 0      | 0      | 0      | 0      | 0      | 0      | 0      | 0      | 0      | 0      | 0      | 0      | 0      | 0      | 0      |
| Sodalis           | 2              | 71             | 0      | 0      | 0      | 0      | 0      | 0      | 0      | 0      | 0      | 0      | 0      | 0      | 0      | 0      | 0      | 0      | 0      | 0      |
| Solibacillus      | 1              | 23             | 0      | 0      | 0      | 0      | 0      | 0      | 0      | 0      | 0      | 0      | 0      | 0      | 0      | 0      | 0      | 0      | 0      | 0      |
| Solitaea          | 1              | 13             | 0      | 0      | 0      | 0      | 0      | 0      | 0      | 0      | 0      | 0      | 0      | 0      | 0      | 0      | 0      | 0      | 0      | 0      |
| Sorangium         | 3              | 115            | 0      | 0      | 0      | 0      | 0      | 0      | 0      | 0      | 0      | 0      | 0      | 0      | 0      | 0      | 1      | 0      | 0      | 0      |
| Sphaerobacter     | 2              | 100            | 0      | 0      | 0      | 0      | 0      | 0      | 0      | 0      | 0      | 0      | 0      | 0      | 0      | 0      | 0      | 0      | 0      | 0      |
| Sphaerochaeta     | 1              | 42             | 0      | 0      | 0      | 0      | 0      | 0      | 0      | 0      | 0      | 0      | 0      | 0      | 0      | 0      | 0      | 0      | 0      | 0      |
| Sphingobacterium  | 3              | 85             | 0      | 0      | 0      | 0      | 0      | 0      | 0      | 0      | 0      | 0      | 0      | 0      | 0      | 0      | 0      | 0      | 0      | 0      |
| Sphingobium       | 1              | 179            | 0      | 0      | 0      | 0      | 0      | 0      | 0      | 1      | 0      | 0      | 0      | 0      | 0      | 0      | 0      | 0      | 0      | 1      |
| Sphingomonadaceae | 1              | 15             | 0      | 0      | 0      | 0      | 0      | 0      | 0      | 0      | 0      | 0      | 0      | 0      | 0      | 0      | 0      | 0      | 0      | 0      |
| Sphingomonas      | 2              | 220            | 0      | 0      | 0      | 0      | 0      | 0      | 0      | 1      | 0      | 0      | 0      | 0      | 0      | 0      | 1      | 0      | 0      | 1      |
| Sphingopyxis      | 3              | 99             | 0      | 0      | 0      | 0      | 0      | 0      | 0      | 0      | 0      | 0      | 0      | 0      | 0      | 0      | 0      | 0      | 0      | 0      |
| Spirochaeta       | 2              | 103            | 0      | 0      | 0      | 0      | 0      | 0      | 0      | 0      | 0      | 0      | 0      | 0      | 0      | 0      | 0      | 0      | 0      | 0      |
| Spiroplasma       | 1              | 6              | 0      | 0      | 0      | 0      | 0      | 0      | 0      | 0      | 0      | 0      | 0      | 0      | 0      | 0      | 0      | 0      | 0      | 0      |
| Spirosoma         | 2              | 107            | 0      | 0      | 0      | 0      | 0      | 0      | 0      | 0      | 0      | 0      | 0      | 0      | 0      | 0      | 0      | 0      | 0      | 0      |
| Stackebrandtia    | 2              | 110            | 0      | 0      | 0      | 0      | 0      | 0      | 0      | 0      | 0      | 1      | 0      | 0      | 0      | 0      | 1      | 0      | 0      | 0      |
| Stanieria         | 1              | 17             | 0      | 0      | 0      | 0      | 0      | 0      | 0      | 0      | 0      | 0      | 0      | 0      | 0      | 0      | 0      | 0      | 0      | 0      |
| Staphylococcus    | 2              | 108            | 0      | 0      | 0      | 0      | 0      | 0      | 0      | 0      | 0      | 0      | 0      | 0      | 0      | 0      | 0      | 0      | 0      | 0      |
| Staphylothermus   | 1              | 12             | 0      | 0      | 0      | 0      | 0      | 0      | 0      | 0      | 0      | 0      | 0      | 0      | 0      | 0      | 0      | 0      | 0      | 0      |

| Genus                  | Cluster Number | Protein Counts | K07538 | K07540 | K07543 | K07545 | K07546 | K07547 | K07549 | K07823 | K07824 | K08295 | K08686 | K08689 | K08690 | K08710 | K09461 | K10215 | K10216 | K10217 |
|------------------------|----------------|----------------|--------|--------|--------|--------|--------|--------|--------|--------|--------|--------|--------|--------|--------|--------|--------|--------|--------|--------|
| Stappia                | 1              | 2              | 0      | 0      | 0      | 0      | 0      | 0      | 0      | 0      | 0      | 0      | 0      | 0      | 0      | 0      | 0      | 0      | 0      | 0      |
| Starkeya               | 3              | 134            | 0      | 0      | 0      | 0      | 0      | 0      | 0      | 0      | 0      | 0      | 0      | 0      | 0      | 0      | 0      | 0      | 0      | 0      |
| Stenotrophomonas       | 3              | 104            | 0      | 0      | 0      | 0      | 0      | 0      | 0      | 0      | 0      | 0      | 0      | 0      | 0      | 0      | 0      | 0      | 0      | 0      |
| Stigmatella            | 3              | 129            | 0      | 0      | 0      | 0      | 0      | 0      | 0      | 1      | 0      | 0      | 0      | 0      | 0      | 0      | 0      | 0      | 0      | 1      |
| Streptobacillus        | 1              | 38             | 0      | 0      | 0      | 0      | 0      | 0      | 0      | 0      | 0      | 0      | 0      | 0      | 0      | 0      | 0      | 0      | 0      | 0      |
| Streptococcus          | 2              | 121            | 0      | 0      | 0      | 0      | 0      | 0      | 0      | 0      | 0      | 0      | 0      | 0      | 0      | 0      | 0      | 0      | 0      | 0      |
| Streptomyces           | 2              | 253            | 0      | 0      | 0      | 0      | 0      | 0      | 0      | 0      | 0      | 1      | 0      | 0      | 0      | 0      | 1      | 0      | 0      | 1      |
| Streptosporangium      | 3              | 148            | 0      | 0      | 0      | 0      | 0      | 0      | 0      | 0      | 0      | 0      | 0      | 0      | 0      | 0      | 0      | 0      | 0      | 1      |
| Strigomonas            | 1              | 2              | 0      | 0      | 0      | 0      | 0      | 0      | 0      | 0      | 0      | 0      | 0      | 0      | 0      | 0      | 0      | 0      | 0      | 0      |
| Sulfitobacter          | 1              | 10             | 0      | 0      | 0      | 0      | 0      | 0      | 0      | 0      | 0      | 0      | 0      | 0      | 0      | 0      | 0      | 0      | 0      | 0      |
| Sulfobacillus          | 1              | 30             | 0      | 0      | 0      | 0      | 0      | 0      | 0      | 0      | 0      | 0      | 0      | 0      | 0      | 0      | 0      | 0      | 0      | 1      |
| Sulfolobus             | 1              | 23             | 0      | 0      | 0      | 0      | 0      | 0      | 0      | 0      | 0      | 0      | 0      | 0      | 0      | 0      | 0      | 0      | 0      | 0      |
| Sulfuricurvum          | 2              | 67             | 0      | 0      | 0      | 0      | 0      | 0      | 0      | 0      | 0      | 0      | 0      | 0      | 0      | 0      | 0      | 0      | 0      | 0      |
| Sulfurihydrogenibium   | 2              | 55             | 0      | 0      | 0      | 0      | 0      | 0      | 0      | 0      | 0      | 0      | 0      | 0      | 0      | 0      | 0      | 0      | 0      | 0      |
| Sulfurimonas           | 2              | 60             | 0      | 0      | 0      | 0      | 0      | 0      | 0      | 0      | 0      | 0      | 0      | 0      | 0      | 0      | 0      | 0      | 0      | 0      |
| Sulfurospirillum       | 1              | 48             | 0      | 0      | 0      | 0      | 0      | 0      | 0      | 0      | 0      | 0      | 0      | 0      | 0      | 0      | 0      | 0      | 0      | 0      |
| Sulfurovum             | 2              | 48             | 0      | 0      | 0      | 0      | 0      | 0      | 0      | 0      | 0      | 0      | 0      | 0      | 0      | 0      | 0      | 0      | 0      | 0      |
| Symbiobacterium        | 2              | 68             | 0      | 0      | 0      | 0      | 0      | 0      | 0      | 0      | 0      | 0      | 0      | 0      | 0      | 0      | 0      | 0      | 0      | 0      |
| Synechococcus          | 1              | 34             | 0      | 0      | 0      | 0      | 0      | 0      | 0      | 0      | 0      | 0      | 0      | 0      | 0      | 0      | 0      | 0      | 0      | 0      |
| Synechocystis          | 1              | 40             | 0      | 0      | 0      | 0      | 0      | 0      | 0      | 0      | 0      | 0      | 0      | 0      | 0      | 0      | 0      | 0      | 0      | 0      |
| Synergistetes          | 1              | 27             | 0      | 0      | 0      | 0      | 0      | 0      | 0      | 0      | 0      | 0      | 0      | 0      | 0      | 0      | 0      | 0      | 0      | 0      |
| Syntrophobacter        | 2              | 101            | 0      | 0      | 0      | 0      | 0      | 0      | 0      | 0      | 0      | 0      | 0      | 0      | 0      | 0      | 0      | 0      | 0      | 0      |
| Syntrophobotulus       | 2              | 71             | 0      | 0      | 0      | 0      | 0      | 0      | 0      | 0      | 0      | 0      | 0      | 0      | 0      | 0      | 0      | 0      | 0      | 0      |
| Syntrophomonas         | 2              | 58             | 0      | 0      | 0      | 0      | 0      | 0      | 0      | 0      | 0      | 0      | 0      | 0      | 0      | 0      | 0      | 0      | 0      | 0      |
| Syntrophothermus       | 2              | 60             | 0      | 0      | 0      | 0      | 0      | 0      | 0      | 0      | 0      | 0      | 0      | 0      | 0      | 0      | 0      | 0      | 0      | 0      |
| Syntrophus             | 2              | 66             | 1      | 0      | 0      | 0      | 0      | 0      | 0      | 0      | 0      | 1      | 0      | 0      | 0      | 0      | 0      | 0      | 0      | 0      |
| Tannerella             | 1              | 8              | 0      | 0      | 0      | 0      | 0      | 0      | 0      | 0      | 0      | 0      | 0      | 0      | 0      | 0      | 0      | 0      | 0      | 0      |
| Taylorella             | 1              | 43             | 0      | 0      | 0      | 0      | 0      | 0      | 0      | 0      | 0      | 0      | 0      | 0      | 0      | 0      | 0      | 0      | 0      | 0      |
| Tepidanaerobacter      | 2              | 55             | 0      | 0      | 0      | 0      | 0      | 0      | 0      | 0      | 0      | 0      | 0      | 0      | 0      | 0      | 0      | 0      | 0      | 0      |
| Teredinibacter         | 2              | 109            | 0      | 0      | 0      | 0      | 0      | 0      | 0      | 0      | 0      | 0      | 0      | 0      | 0      | 0      | 0      | 0      | 0      | 0      |
| Terrabacter            | 1              | 1              | 0      | 0      | 0      | 0      | 0      | 0      | 0      | 0      | 0      | 0      | 0      | 0      | 0      | 0      | 0      | 0      | 0      | 0      |
| Terriglobus            | 2              | 83             | 0      | 0      | 0      | 0      | 0      | 0      | 0      | 0      | 0      | 0      | 0      | 0      | 0      | 0      | 0      | 0      | 0      | 0      |
| Tetragenococcus        | 1              | 12             | 0      | 0      | 0      | 0      | 0      | 0      | 0      | 0      | 0      | 0      | 0      | 0      | 0      | 0      | 0      | 0      | 0      | 0      |
| Thalassiobium          | 1              | 11             | 0      | 0      | 0      | 0      | 0      | 0      | 0      | 0      | 0      | 0      | 0      | 0      | 0      | 0      | 0      | 0      | 0      | 0      |
| Thalassobacter         | 1              | 9              | 0      | 0      | 0      | 0      | 0      | 0      | 0      | 0      | 0      | 0      | 0      | 0      | 0      | 0      | 0      | 0      | 0      | 0      |
| Thalassolituus         | 1              | 12             | 0      | 0      | 0      | 0      | 0      | 0      | 0      | 0      | 0      | 0      | 0      | 0      | 0      | 0      | 0      | 0      | 0      | 0      |
| Thalassospira          | 1              | 2              | 0      | 0      | 0      | 0      | 0      | 0      | 0      | 0      | 0      | 0      | 0      | 0      | 0      | 0      | 0      | 0      | 0      | 0      |
| Thauera                | 1              | 111            | 1      | 0      | 0      | 0      | 0      | 0      | 0      | 0      | 0      | 0      | 0      | 0      | 0      | 0      | 0      | 0      | 1      | 1      |
| Thermacetogenium       | 1              | 7              | 0      | 0      | 0      | 0      | 0      | 0      | 0      | 0      | 0      | 0      | 0      | 0      | 0      | 0      | 0      | 0      | 0      | 0      |
| Thermaerobacter        | 2              | 79             | 0      | 0      | 0      | 0      | 0      | 0      | 0      | 0      | 0      | 0      | 0      | 0      | 0      | 0      | 0      | 0      | 0      | 1      |
| Thermanaerovibrio      | 2              | 58             | 0      | 0      | 0      | 0      | 0      | 0      | 0      | 0      | 0      | 0      | 0      | 0      | 0      | 0      | 0      | 0      | 0      | 0      |
| Thermincola            | 2              | 62             | 0      | 0      | 0      | 0      | 0      | 0      | 0      | 0      | 0      | 0      | 0      | 0      | 0      | 0      | 0      | 0      | 0      | 0      |
| Thermoanaerobacter     | 2              | 76             | 0      | 0      | 0      | 0      | 0      | 0      | 0      | 0      | 0      | 0      | 0      | 0      | 0      | 0      | 0      | 0      | 0      | 0      |
| Thermoanaerobacterium  | 2              | 64             | 0      | 0      | 0      | 0      | 0      | 0      | 0      | 0      | 0      | 0      | 0      | 0      | 0      | 0      | 0      | 0      | 0      | 0      |
| Thermobacillus         | 1              | 11             | 0      | 0      | 0      | 0      | 0      | 0      | 0      | 0      | 0      | 0      | 0      | 0      | 0      | 0      | 0      | 0      | 0      | 0      |
| Thermobaculum          | 2              | 62             | 0      | 0      | 0      | 0      | 0      | 0      | 0      | 0      | 0      | 0      | 0      | 0      | 0      | 0      | 0      | 0      | 0      | 0      |
| Thermobifida           | 2              | 72             | 0      | 0      | 0      | 0      | 0      | 0      | 0      | 0      | 0      | 0      | 0      | 0      | 0      | 0      | 0      | 0      | 0      | 0      |
| Thermobispora          | 2              | 109            | 0      | 0      | 0      | 0      | 0      | 0      | 0      | 0      | 0      | 0      | 0      | 0      | 0      | 0      | 0      | 0      | 0      | 0      |
| Thermococcus           | 1              | 13             | 0      | 0      | 0      | 0      | 0      | 0      | 0      | 0      | 0      | 0      | 0      | 0      | 0      | 0      | 0      | 0      | 0      | 0      |
| Thermocrinis           | 2              | 60             | 0      | 0      | 0      | 0      | 0      | 0      | 0      | 0      | 0      | 0      | 0      | 0      | 0      | 0      | 0      | 0      | 0      | 0      |
| Thermodesulfator       | 1              | 10             | 0      | 0      | 0      | 0      | 0      | 0      | 0      | 0      | 0      | 0      | 0      | 0      | 0      | 0      | 0      | 0      | 0      | 0      |
| Thermodesulfobacterium | 1              | 9              | 0      | 0      | 0      | 0      | 0      | 0      | 0      | 0      | 0      | 0      | 0      | 0      | 0      | 0      | 0      | 0      | 0      | 0      |

| Genus                | Cluster Number | Protein Counts | K07538 | K07540 | K07543 | K07545 | K07546 | K07547 | K07549 | K07823 | K07824 | K08295 | K08686 | K08689 | K08690 | K08710 | K09461 | K10215 | K10216 | K10217 |
|----------------------|----------------|----------------|--------|--------|--------|--------|--------|--------|--------|--------|--------|--------|--------|--------|--------|--------|--------|--------|--------|--------|
| Thermodesulfobium    | 1              | 13             | 0      | 0      | 0      | 0      | 0      | 0      | 0      | 0      | 0      | 0      | 0      | 0      | 0      | 0      | 0      | 0      | 0      | 0      |
| Thermodesulfobivrio  | 2              | 60             | 0      | 0      | 0      | 0      | 0      | 0      | 0      | 0      | 0      | 0      | 0      | 0      | 0      | 0      | 0      | 0      | 0      | 0      |
| Thermofilum          | 1              | 9              | 0      | 0      | 0      | 0      | 0      | 0      | 0      | 0      | 0      | 0      | 0      | 0      | 0      | 0      | 0      | 0      | 0      | 0      |
| Thermogladus         | 1              | 7              | 0      | 0      | 0      | 0      | 0      | 0      | 0      | 0      | 0      | 0      | 0      | 0      | 0      | 0      | 0      | 0      | 0      | 0      |
| Thermomicrobium      | 2              | 92             | 0      | 0      | 0      | 0      | 0      | 0      | 0      | 0      | 0      | 0      | 0      | 0      | 0      | 0      | 0      | 0      | 0      | 0      |
| Thermomonospora      | 2              | 125            | 0      | 0      | 0      | 0      | 0      | 0      | 0      | 0      | 0      | 0      | 0      | 0      | 0      | 0      | 0      | 0      | 0      | 1      |
| Thermoplasma         | 1              | 11             | 0      | 0      | 0      | 0      | 0      | 0      | 0      | 0      | 0      | 0      | 0      | 0      | 0      | 0      | 0      | 0      | 0      | 0      |
| Thermoplasmatales    | 1              | 6              | 0      | 0      | 0      | 0      | 0      | 0      | 0      | 0      | 0      | 0      | 0      | 0      | 0      | 0      | 0      | 0      | 0      | 0      |
| Thermoproteus        | 1              | 12             | 0      | 0      | 0      | 0      | 0      | 0      | 0      | 0      | 0      | 0      | 0      | 0      | 0      | 0      | 0      | 0      | 0      | 0      |
| Thermosediminibacter | 2              | 64             | 0      | 0      | 0      | 0      | 0      | 0      | 0      | 0      | 0      | 0      | 0      | 0      | 0      | 0      | 0      | 0      | 0      | 0      |
| Thermosipho          | 2              | 70             | 0      | 0      | 0      | 0      | 0      | 0      | 0      | 0      | 0      | 0      | 0      | 0      | 0      | 0      | 0      | 0      | 0      | 0      |
| Thermosphaera        | 1              | 10             | 0      | 0      | 0      | 0      | 0      | 0      | 0      | 0      | 0      | 0      | 0      | 0      | 0      | 0      | 0      | 0      | 0      | 0      |
| Thermosynechococcus  | 1              | 6              | 0      | 0      | 0      | 0      | 0      | 0      | 0      | 0      | 0      | 0      | 0      | 0      | 0      | 0      | 0      | 0      | 0      | 0      |
| Thermotoga           | 2              | 80             | 0      | 0      | 0      | 0      | 0      | 0      | 0      | 0      | 0      | 0      | 0      | 0      | 0      | 0      | 0      | 0      | 0      | 0      |
| Thermovibrio         | 2              | 58             | 0      | 0      | 0      | 0      | 0      | 0      | 0      | 0      | 0      | 0      | 0      | 0      | 0      | 0      | 0      | 0      | 0      | 0      |
| Thermovirga          | 1              | 9              | 0      | 0      | 0      | 0      | 0      | 0      | 0      | 0      | 0      | 0      | 0      | 0      | 0      | 0      | 0      | 0      | 0      | 0      |
| Thermus              | 2              | 107            | 0      | 0      | 0      | 0      | 0      | 0      | 0      | 0      | 0      | 0      | 0      | 0      | 0      | 0      | 0      | 0      | 0      | 1      |
| Thioalkalimicrobium  | 1              | 4              | 0      | 0      | 0      | 0      | 0      | 0      | 0      | 0      | 0      | 0      | 0      | 0      | 0      | 0      | 0      | 0      | 0      | 0      |
| Thioalkalivibrio     | 2              | 91             | 0      | 0      | 0      | 0      | 0      | 0      | 0      | 0      | 0      | 0      | 0      | 0      | 0      | 0      | 0      | 0      | 0      | 0      |
| Thiobaca             | 1              | 2              | 0      | 0      | 0      | 0      | 0      | 0      | 0      | 0      | 0      | 0      | 0      | 0      | 0      | 0      | 0      | 0      | 0      | 0      |
| Thiobacillus         | 2              | 67             | 0      | 0      | 0      | 0      | 0      | 0      | 0      | 0      | 0      | 0      | 0      | 0      | 0      | 0      | 0      | 0      | 0      | 0      |
| Thiocapsa            | 1              | 2              | 0      | 0      | 0      | 0      | 0      | 0      | 0      | 0      | 0      | 0      | 0      | 0      | 0      | 0      | 0      | 0      | 0      | 0      |
| Thiocystis           | 1              | 11             | 0      | 0      | 0      | 0      | 0      | 0      | 0      | 0      | 0      | 0      | 0      | 0      | 0      | 0      | 0      | 0      | 0      | 0      |
| Thioflavococcus      | 1              | 13             | 0      | 0      | 0      | 0      | 0      | 0      | 0      | 0      | 0      | 0      | 0      | 0      | 0      | 0      | 0      | 0      | 0      | 0      |
| Thiomicrospira       | 2              | 50             | 0      | 0      | 0      | 0      | 0      | 0      | 0      | 0      | 0      | 0      | 0      | 0      | 0      | 0      | 0      | 0      | 0      | 0      |
| Thiomonas            | 2              | 85             | 0      | 0      | 0      | 0      | 0      | 0      | 0      | 0      | 0      | 0      | 0      | 0      | 0      | 0      | 0      | 0      | 0      | 0      |
| Thiorhodococcus      | 1              | 2              | 0      | 0      | 0      | 0      | 0      | 0      | 0      | 0      | 0      | 0      | 0      | 0      | 0      | 0      | 0      | 0      | 0      | 0      |
| Thiothrix            | 1              | 2              | 0      | 0      | 0      | 0      | 0      | 0      | 0      | 0      | 0      | 0      | 0      | 0      | 0      | 0      | 0      | 0      | 0      | 0      |
| Tistrella            | 1              | 42             | 0      | 0      | 0      | 0      | 0      | 0      | 0      | 0      | 0      | 0      | 0      | 0      | 0      | 0      | 0      | 0      | 0      | 1      |
| Tolumonas            | 2              | 100            | 0      | 0      | 0      | 0      | 0      | 0      | 0      | 0      | 0      | 0      | 0      | 0      | 0      | 0      | 0      | 0      | 0      | 0      |
| Transposon           | 1              | 2              | 0      | 0      | 0      | 0      | 0      | 0      | 0      | 0      | 0      | 0      | 0      | 0      | 0      | 0      | 0      | 0      | 0      | 0      |
| Treponema            | 1              | 63             | 0      | 0      | 0      | 0      | 0      | 0      | 0      | 0      | 0      | 0      | 0      | 0      | 0      | 0      | 0      | 0      | 0      | 0      |
| Trichodesmium        | 2              | 71             | 0      | 0      | 0      | 0      | 0      | 0      | 0      | 0      | 0      | 0      | 0      | 0      | 0      | 0      | 0      | 0      | 0      | 0      |
| Trichormus           | 1              | 12             | 0      | 0      | 0      | 0      | 0      | 0      | 0      | 0      | 0      | 0      | 0      | 0      | 0      | 0      | 0      | 0      | 0      | 0      |
| Tropheryma           | 2              | 22             | 0      | 0      | 0      | 0      | 0      | 0      | 0      | 0      | 0      | 0      | 0      | 0      | 0      | 0      | 0      | 0      | 0      | 0      |
| Truepera             | 2              | 104            | 0      | 0      | 0      | 0      | 0      | 0      | 0      | 0      | 0      | 0      | 0      | 0      | 0      | 0      | 0      | 0      | 0      | 0      |
| Tsukamurella         | 2              | 123            | 0      | 0      | 0      | 0      | 0      | 0      | 0      | 0      | 0      | 0      | 0      | 0      | 0      | 0      | 0      | 0      | 0      | 0      |
| Turneriella          | 1              | 16             | 0      | 0      | 0      | 0      | 0      | 0      | 0      | 0      | 0      | 0      | 0      | 0      | 0      | 0      | 0      | 0      | 0      | 0      |
| Uliginosibacterium   | 1              | 2              | 0      | 0      | 0      | 0      | 0      | 0      | 0      | 0      | 0      | 0      | 0      | 0      | 0      | 0      | 0      | 0      | 0      | 0      |
| Ureaplasma           | 1              | 24             | 0      | 0      | 0      | 0      | 0      | 0      | 0      | 0      | 0      | 0      | 0      | 0      | 0      | 0      | 0      | 0      | 0      | 0      |
| Ureibacillus         | 1              | 2              | 0      | 0      | 0      | 0      | 0      | 0      | 0      | 0      | 0      | 0      | 0      | 0      | 0      | 0      | 0      | 0      | 0      | 0      |
| Variovorax           | 3              | 187            | 0      | 0      | 0      | 0      | 1      | 0      | 0      | 0      | 0      | 1      | 0      | 0      | 0      | 0      | 1      | 0      | 0      | 0      |
| Veillonella          | 1              | 54             | 0      | 0      | 0      | 0      | 0      | 0      | 0      | 0      | 0      | 0      | 0      | 0      | 0      | 0      | 0      | 0      | 0      | 0      |
| Verminephrobacter    | 3              | 188            | 0      | 0      | 1      | 1      | 1      | 0      | 0      | 0      | 0      | 0      | 0      | 0      | 0      | 1      | 1      | 0      | 1      | 1      |
| Verrucosispora       | 3              | 126            | 0      | 0      | 0      | 0      | 0      | 0      | 0      | 0      | 0      | 0      | 0      | 0      | 0      | 0      | 0      | 0      | 0      | 1      |
| Vibrio               | 2              | 195            | 0      | 0      | 0      | 0      | 0      | 0      | 0      | 0      | 0      | 0      | 0      | 0      | 0      | 0      | 0      | 0      | 0      | 0      |
| Vibrionales          | 1              | 46             | 0      | 0      | 0      | 0      | 0      | 0      | 0      | 0      | 0      | 0      | 0      | 0      | 0      | 0      | 0      | 0      | 0      | 0      |
| Vitreoscilla         | 1              | 1              | 0      | 0      | 0      | 0      | 0      | 0      | 0      | 0      | 0      | 0      | 0      | 0      | 0      | 0      | 0      | 0      | 0      | 0      |
| Vulcanisaeta         | 1              | 14             | 0      | 0      | 0      | 0      | 0      | 0      | 0      | 0      | 0      | 0      | 0      | 0      | 0      | 0      | 0      | 0      | 0      | 0      |
| Waddlia              | 2              | 68             | 0      | 0      | 0      | 0      | 0      | 0      | 0      | 0      | 0      | 0      | 0      | 0      | 0      | 0      | 0      | 0      | 0      | 0      |
| Wautersia            | 1              | 2              | 0      | 0      | 0      | 0      | 0      | 0      | 0      | 0      | 0      | 0      | 0      | 0      | 0      | 0      | 0      | 0      | 0      | 0      |
| Weeksella            | 2              | 65             | 0      | 0      | 0      | 0      | 0      | 0      | 0      | 0      | 0      | 0      | 0      | 0      | 0      | 0      | 0      | 0      | 0      | 0      |

| Genus             | Cluster Number | Protein Counts | K07538 | K07540 | K07543 | K07545 | K07546 | K07547 | K07549 | K07823 | K07824 | K08295 | K08686 | K08689 | K08690 | K08710 | K09461 | K10215 | K10216 | K10217 |
|-------------------|----------------|----------------|--------|--------|--------|--------|--------|--------|--------|--------|--------|--------|--------|--------|--------|--------|--------|--------|--------|--------|
| Weissella         | 1              | 14             | 0      | 0      | 0      | 0      | 0      | 0      | 0      | 0      | 0      | 0      | 0      | 0      | 0      | 0      | 0      | 0      | 0      | 0      |
| Wenxinia          | 1              | 2              | 0      | 0      | 0      | 0      | 0      | 0      | 0      | 0      | 0      | 0      | 0      | 0      | 0      | 0      | 0      | 0      | 0      | 0      |
| Wigglesworthia    | 1              | 29             | 0      | 0      | 0      | 0      | 0      | 0      | 0      | 0      | 0      | 0      | 0      | 0      | 0      | 0      | 0      | 0      | 0      | 0      |
| Wolbachia         | 1              | 32             | 0      | 0      | 0      | 0      | 0      | 0      | 0      | 0      | 0      | 0      | 0      | 0      | 0      | 0      | 0      | 0      | 0      | 0      |
| Wolinella         | 2              | 51             | 0      | 0      | 0      | 0      | 0      | 0      | 0      | 0      | 0      | 0      | 0      | 0      | 0      | 0      | 0      | 0      | 0      | 0      |
| Xanthobacter      | 3              | 176            | 0      | 0      | 0      | 0      | 0      | 0      | 0      | 0      | 0      | 0      | 0      | 0      | 0      | 0      | 0      | 0      | 0      | 0      |
| Xanthobacteraceae | 1              | 4              | 0      | 0      | 0      | 0      | 0      | 0      | 0      | 0      | 0      | 0      | 0      | 0      | 0      | 0      | 0      | 0      | 0      | 0      |
| Xanthomonadaceae  | 1              | 39             | 0      | 0      | 0      | 0      | 0      | 0      | 0      | 0      | 0      | 0      | 0      | 0      | 0      | 0      | 0      | 0      | 0      | 0      |
| Xanthomonas       | 2              | 162            | 0      | 0      | 0      | 0      | 0      | 0      | 0      | 1      | 0      | 0      | 0      | 0      | 0      | 0      | 0      | 0      | 0      | 0      |
| Xenorhabdus       | 2              | 127            | 0      | 0      | 0      | 0      | 0      | 0      | 0      | 0      | 0      | 0      | 0      | 0      | 0      | 0      | 0      | 0      | 0      | 0      |
| Xylanimonas       | 2              | 66             | 0      | 0      | 0      | 0      | 0      | 0      | 0      | 0      | 0      | 0      | 0      | 0      | 0      | 0      | 1      | 0      | 0      | 0      |
| Xylella           | 2              | 52             | 0      | 0      | 0      | 0      | 0      | 0      | 0      | 0      | 0      | 0      | 0      | 0      | 0      | 0      | 0      | 0      | 0      | 0      |
| Yersinia          | 2              | 145            | 0      | 0      | 0      | 0      | 0      | 0      | 0      | 0      | 0      | 0      | 0      | 0      | 0      | 0      | 0      | 0      | 0      | 0      |
| Yokenella         | 2              | 61             | 0      | 0      | 0      | 0      | 0      | 0      | 0      | 0      | 0      | 0      | 0      | 0      | 0      | 0      | 0      | 0      | 0      | 0      |
| Zobellia          | 1              | 28             | 0      | 0      | 0      | 0      | 0      | 0      | 0      | 0      | 0      | 0      | 0      | 0      | 0      | 0      | 0      | 0      | 0      | 0      |
| Zunongwangia      | 2              | 98             | 0      | 0      | 0      | 0      | 0      | 0      | 0      | 0      | 0      | 0      | 0      | 0      | 0      | 0      | 0      | 0      | 0      | 0      |
| Zymomonas         | 2              | 67             | 0      | 0      | 0      | 0      | 0      | 0      | 0      | 0      | 0      | 0      | 0      | 0      | 0      | 0      | 0      | 0      | 0      | 0      |
| Zymophilus        | 1              | 2              | 0      | 0      | 0      | 0      | 0      | 0      | 0      | 0      | 0      | 0      | 0      | 0      | 0      | 0      | 0      | 0      | 0      | 0      |



| Genus               | Cluster Number | Protein Counts | K10218 | K10219 | K10220 | K10221 | K10222 | K10616 | K10617 | K10618 | K10619 | K10621 | K10622 | K10623 | K10676 | K10700 | K10701 | K10702 | K11180 | K11946 |
|---------------------|----------------|----------------|--------|--------|--------|--------|--------|--------|--------|--------|--------|--------|--------|--------|--------|--------|--------|--------|--------|--------|
| Acaricomes          | 1              | 2              | 0      | 0      | 0      | 0      | 0      | 0      | 0      | 0      | 0      | 0      | 0      | 0      | 0      | 0      | 0      | 0      | 0      | 0      |
| Acaryochloris       | 2              | 88             | 0      | 0      | 0      | 0      | 0      | 0      | 0      | 0      | 0      | 0      | 0      | 0      | 0      | 0      | 0      | 0      | 0      | 0      |
| Acetivibrio         | 1              | 2              | 0      | 0      | 0      | 0      | 0      | 0      | 0      | 0      | 0      | 0      | 0      | 0      | 0      | 0      | 0      | 0      | 0      | 0      |
| Acetobacter         | 2              | 85             | 0      | 0      | 0      | 0      | 0      | 0      | 0      | 0      | 0      | 0      | 0      | 0      | 0      | 0      | 0      | 0      | 0      | 0      |
| Acetobacteraceae    | 1              | 2              | 0      | 0      | 0      | 0      | 0      | 0      | 0      | 0      | 0      | 0      | 0      | 0      | 0      | 0      | 0      | 0      | 0      | 0      |
| Acetobacterium      | 1              | 8              | 0      | 0      | 0      | 0      | 0      | 0      | 0      | 0      | 0      | 0      | 0      | 0      | 0      | 0      | 0      | 0      | 0      | 0      |
| Acetohalobium       | 2              | 79             | 0      | 0      | 0      | 0      | 0      | 0      | 0      | 0      | 0      | 0      | 0      | 0      | 0      | 0      | 0      | 0      | 0      | 0      |
| Acholeplasma        | 2              | 38             | 0      | 0      | 0      | 0      | 0      | 0      | 0      | 0      | 0      | 0      | 0      | 0      | 0      | 0      | 0      | 0      | 0      | 0      |
| Achromobacter       | 2              | 192            | 0      | 0      | 0      | 0      | 1      | 0      | 0      | 0      | 0      | 1      | 1      | 0      | 1      | 0      | 0      | 0      | 0      | 0      |
| Acidaminococcus     | 1              | 65             | 0      | 0      | 0      | 0      | 0      | 0      | 0      | 0      | 0      | 0      | 0      | 0      | 0      | 0      | 0      | 0      | 0      | 0      |
| Acidianus           | 1              | 9              | 0      | 0      | 0      | 0      | 0      | 0      | 0      | 0      | 0      | 0      | 0      | 0      | 0      | 0      | 0      | 0      | 0      | 0      |
| Acidilobus          | 1              | 8              | 0      | 0      | 0      | 0      | 0      | 0      | 0      | 0      | 0      | 0      | 0      | 0      | 0      | 0      | 0      | 0      | 0      | 0      |
| Acidimicrobium      | 2              | 58             | 0      | 0      | 0      | 0      | 0      | 0      | 0      | 0      | 0      | 0      | 0      | 0      | 0      | 0      | 0      | 0      | 0      | 0      |
| Acidiphilium        | 3              | 144            | 0      | 0      | 1      | 0      | 0      | 0      | 0      | 0      | 0      | 0      | 0      | 0      | 0      | 0      | 0      | 0      | 0      | 0      |
| Acidithiobacillus   | 2              | 70             | 0      | 0      | 0      | 0      | 0      | 0      | 0      | 0      | 0      | 0      | 0      | 0      | 0      | 0      | 0      | 0      | 0      | 0      |
| Acidobacterium      | 2              | 91             | 0      | 0      | 0      | 0      | 0      | 0      | 0      | 0      | 0      | 0      | 0      | 0      | 0      | 0      | 0      | 0      | 0      | 0      |
| Acidocella          | 1              | 2              | 0      | 0      | 0      | 0      | 0      | 0      | 0      | 0      | 0      | 0      | 0      | 0      | 0      | 0      | 0      | 0      | 0      | 0      |
| Acidothermus        | 2              | 68             | 0      | 0      | 0      | 0      | 0      | 0      | 0      | 0      | 0      | 0      | 0      | 0      | 0      | 0      | 0      | 0      | 0      | 0      |
| Acidovorax          | 3              | 217            | 1      | 1      | 1      | 1      | 1      | 0      | 0      | 0      | 0      | 0      | 0      | 0      | 0      | 0      | 0      | 0      | 0      | 0      |
| Aciduliprofundum    | 1              | 11             | 0      | 0      | 0      | 0      | 0      | 0      | 0      | 0      | 0      | 0      | 0      | 0      | 0      | 0      | 0      | 0      | 0      | 0      |
| Acinetobacter       | 3              | 188            | 0      | 0      | 0      | 0      | 0      | 0      | 0      | 0      | 0      | 0      | 0      | 0      | 1      | 0      | 0      | 0      | 0      | 0      |
| Actinobacillus      | 2              | 112            | 0      | 0      | 0      | 0      | 0      | 0      | 0      | 0      | 0      | 0      | 0      | 0      | 0      | 0      | 0      | 0      | 0      | 0      |
| Actinomadura        | 1              | 1              | 0      | 0      | 0      | 0      | 0      | 0      | 0      | 0      | 0      | 0      | 0      | 0      | 0      | 0      | 0      | 0      | 0      | 0      |
| Actinoplanes        | 1              | 52             | 1      | 0      | 1      | 0      | 0      | 0      | 0      | 0      | 0      | 0      | 0      | 0      | 0      | 0      | 0      | 0      | 0      | 0      |
| Actinopolyspora     | 1              | 2              | 0      | 0      | 0      | 0      | 0      | 0      | 0      | 0      | 0      | 0      | 0      | 0      | 0      | 0      | 0      | 0      | 0      | 0      |
| Actinosynnema       | 2              | 122            | 0      | 0      | 0      | 0      | 0      | 0      | 0      | 0      | 0      | 0      | 0      | 0      | 0      | 0      | 0      | 0      | 0      | 0      |
| Advenella           | 1              | 30             | 0      | 0      | 1      | 0      | 0      | 0      | 0      | 0      | 0      | 0      | 0      | 0      | 0      | 0      | 0      | 0      | 0      | 0      |
| Aequorivita         | 1              | 12             | 0      | 0      | 0      | 0      | 0      | 0      | 0      | 0      | 0      | 0      | 0      | 0      | 0      | 0      | 0      | 0      | 0      | 0      |
| Aerococcus          | 2              | 57             | 0      | 0      | 0      | 0      | 0      | 0      | 0      | 0      | 0      | 0      | 0      | 0      | 0      | 0      | 0      | 0      | 0      | 0      |
| Aeromonas           | 2              | 127            | 0      | 0      | 0      | 0      | 0      | 0      | 0      | 0      | 0      | 0      | 0      | 0      | 0      | 0      | 0      | 0      | 0      | 0      |
| Aeropyrum           | 1              | 13             | 0      | 0      | 0      | 0      | 0      | 0      | 0      | 0      | 0      | 0      | 0      | 0      | 0      | 0      | 0      | 0      | 0      | 0      |
| Afipia              | 1              | 54             | 0      | 0      | 0      | 0      | 0      | 0      | 0      | 0      | 0      | 0      | 0      | 0      | 0      | 0      | 0      | 0      | 0      | 0      |
| Aggregatibacter     | 1              | 81             | 0      | 0      | 0      | 0      | 0      | 0      | 0      | 0      | 0      | 0      | 0      | 0      | 0      | 0      | 0      | 0      | 0      | 0      |
| Agrobacterium       | 2              | 242            | 1      | 0      | 0      | 1      | 0      | 0      | 0      | 0      | 0      | 1      | 1      | 0      | 1      | 0      | 0      | 0      | 0      | 0      |
| Ahrensia            | 1              | 2              | 0      | 0      | 0      | 0      | 0      | 0      | 0      | 0      | 0      | 0      | 0      | 0      | 0      | 0      | 0      | 0      | 0      | 0      |
| Akkermansia         | 2              | 47             | 0      | 0      | 0      | 0      | 0      | 0      | 0      | 0      | 0      | 0      | 0      | 0      | 0      | 0      | 0      | 0      | 0      | 0      |
| Albidiferax         | 3              | 144            | 1      | 1      | 1      | 1      | 0      | 0      | 0      | 0      | 0      | 0      | 0      | 0      | 0      | 0      | 0      | 0      | 0      | 0      |
| Alcaligenes         | 1              | 21             | 1      | 0      | 0      | 0      | 0      | 0      | 0      | 0      | 0      | 0      | 0      | 0      | 1      | 0      | 0      | 0      | 0      | 0      |
| Alcanivorax         | 2              | 146            | 0      | 0      | 0      | 0      | 0      | 0      | 0      | 0      | 0      | 0      | 0      | 0      | 0      | 0      | 0      | 0      | 0      | 0      |
| Alicyclophilus      | 3              | 152            | 1      | 0      | 0      | 1      | 0      | 0      | 0      | 0      | 0      | 0      | 0      | 0      | 1      | 0      | 0      | 0      | 0      | 0      |
| Alicyclobacillus    | 2              | 91             | 1      | 0      | 0      | 0      | 0      | 0      | 0      | 0      | 0      | 0      | 0      | 0      | 0      | 0      | 0      | 0      | 0      | 0      |
| Aliivibrio          | 2              | 118            | 0      | 0      | 0      | 0      | 0      | 0      | 0      | 0      | 0      | 0      | 0      | 0      | 0      | 0      | 0      | 0      | 0      | 0      |
| Alishewanella       | 1              | 1              | 0      | 0      | 0      | 0      | 0      | 0      | 0      | 0      | 0      | 0      | 0      | 0      | 0      | 0      | 0      | 0      | 0      | 0      |
| Alistipes           | 1              | 52             | 0      | 0      | 0      | 0      | 0      | 0      | 0      | 0      | 0      | 0      | 0      | 0      | 0      | 0      | 0      | 0      | 0      | 0      |
| Alkalilimnicola     | 2              | 97             | 0      | 0      | 0      | 0      | 0      | 0      | 0      | 0      | 0      | 0      | 0      | 0      | 0      | 0      | 0      | 0      | 1      | 0      |
| Alkaliphilus        | 2              | 62             | 0      | 0      | 0      | 0      | 0      | 0      | 0      | 0      | 0      | 0      | 0      | 0      | 0      | 0      | 0      | 0      | 0      | 0      |
| Allochromatium      | 2              | 84             | 0      | 0      | 0      | 0      | 0      | 0      | 0      | 0      | 0      | 0      | 0      | 0      | 0      | 0      | 0      | 0      | 1      | 0      |
| Alphaproteobacteria | 1              | 3              | 0      | 0      | 0      | 0      | 0      | 0      | 0      | 0      | 0      | 0      | 0      | 0      | 0      | 0      | 0      | 0      | 0      | 0      |
| Alteromonadales     | 1              | 12             | 0      | 0      | 0      | 0      | 0      | 0      | 0      | 0      | 0      | 0      | 0      | 0      | 0      | 0      | 0      | 0      | 0      | 0      |
| Alteromonas         | 1              | 37             | 0      | 0      | 0      | 0      | 0      | 0      | 0      | 0      | 0      | 0      | 0      | 0      | 0      | 0      | 0      | 0      | 0      | 0      |
| Aminobacter         | 1              | 4              | 0      | 0      | 0      | 0      | 0      | 0      | 0      | 0      | 0      | 0      | 0      | 0      | 0      | 0      | 0      | 0      | 0      | 0      |
| Aminobacterium      | 2              | 59             | 0      | 0      | 0      | 0      | 0      | 0      | 0      | 0      | 0      | 0      | 0      | 0      | 0      | 0      | 0      | 0      | 0      | 0      |

| Genus            | Cluster Number | Protein Counts | K10218 | K10219 | K10220 | K10221 | K10222 | K10616 | K10617 | K10618 | K10619 | K10621 | K10622 | K10623 | K10676 | K10700 | K10701 | K10702 | K11180 | K11946 |
|------------------|----------------|----------------|--------|--------|--------|--------|--------|--------|--------|--------|--------|--------|--------|--------|--------|--------|--------|--------|--------|--------|
| Ammonifex        | 2              | 50             | 0      | 0      | 0      | 0      | 0      | 0      | 0      | 0      | 0      | 0      | 0      | 0      | 0      | 0      | 0      | 0      | 1      | 0      |
| Amphibacillus    | 1              | 13             | 0      | 0      | 0      | 0      | 0      | 0      | 0      | 0      | 0      | 0      | 0      | 0      | 0      | 0      | 0      | 0      | 0      | 0      |
| Amphritea        | 1              | 2              | 0      | 0      | 0      | 0      | 0      | 0      | 0      | 0      | 0      | 0      | 0      | 0      | 0      | 0      | 0      | 0      | 0      | 0      |
| Amycolatopsis    | 2              | 201            | 0      | 0      | 0      | 0      | 0      | 0      | 0      | 0      | 0      | 0      | 0      | 0      | 1      | 0      | 0      | 0      | 0      | 0      |
| Amycolicoccus    | 1              | 43             | 0      | 0      | 0      | 0      | 0      | 0      | 0      | 0      | 0      | 0      | 0      | 0      | 0      | 0      | 0      | 0      | 0      | 0      |
| Anabaena         | 2              | 92             | 0      | 0      | 0      | 0      | 0      | 0      | 0      | 0      | 0      | 0      | 0      | 0      | 0      | 0      | 0      | 0      | 0      | 0      |
| Anaerobaculum    | 1              | 11             | 0      | 0      | 0      | 0      | 0      | 0      | 0      | 0      | 0      | 0      | 0      | 0      | 0      | 0      | 0      | 0      | 0      | 0      |
| Anaerococcus     | 2              | 46             | 0      | 0      | 0      | 0      | 0      | 0      | 0      | 0      | 0      | 0      | 0      | 0      | 0      | 0      | 0      | 0      | 0      | 0      |
| Anaerolinea      | 2              | 66             | 0      | 0      | 0      | 0      | 0      | 0      | 0      | 0      | 0      | 0      | 0      | 0      | 0      | 0      | 0      | 0      | 0      | 0      |
| Anaeromyxobacter | 3              | 117            | 0      | 0      | 0      | 0      | 0      | 0      | 0      | 0      | 0      | 0      | 0      | 0      | 0      | 0      | 0      | 0      | 0      | 0      |
| Anaerostipes     | 1              | 44             | 0      | 0      | 0      | 0      | 0      | 0      | 0      | 0      | 0      | 0      | 0      | 0      | 0      | 0      | 0      | 0      | 0      | 0      |
| Anaerotruncus    | 1              | 2              | 0      | 0      | 0      | 0      | 0      | 0      | 0      | 0      | 0      | 0      | 0      | 0      | 0      | 0      | 0      | 0      | 0      | 0      |
| Anaplasma        | 1              | 35             | 0      | 0      | 0      | 0      | 0      | 0      | 0      | 0      | 0      | 0      | 0      | 0      | 0      | 0      | 0      | 0      | 0      | 0      |
| Ancylobacter     | 1              | 3              | 0      | 0      | 0      | 0      | 0      | 0      | 0      | 0      | 0      | 0      | 0      | 0      | 0      | 0      | 0      | 0      | 0      | 0      |
| Aneurinibacillus | 1              | 1              | 0      | 0      | 0      | 0      | 0      | 0      | 0      | 0      | 0      | 0      | 0      | 0      | 0      | 0      | 0      | 0      | 0      | 0      |
| Angomonas        | 1              | 1              | 0      | 0      | 0      | 0      | 0      | 0      | 0      | 0      | 0      | 0      | 0      | 0      | 0      | 0      | 0      | 0      | 0      | 0      |
| Anoxybacillus    | 2              | 72             | 0      | 0      | 0      | 0      | 0      | 0      | 0      | 0      | 0      | 0      | 0      | 0      | 0      | 0      | 0      | 0      | 0      | 0      |
| Aquifex          | 2              | 45             | 0      | 0      | 0      | 0      | 0      | 0      | 0      | 0      | 0      | 0      | 0      | 0      | 0      | 0      | 0      | 0      | 0      | 0      |
| Aquimarina       | 1              | 2              | 0      | 0      | 0      | 0      | 0      | 0      | 0      | 0      | 0      | 0      | 0      | 0      | 0      | 0      | 0      | 0      | 0      | 0      |
| Arcanobacterium  | 2              | 45             | 0      | 0      | 0      | 0      | 0      | 0      | 0      | 0      | 0      | 0      | 0      | 0      | 0      | 0      | 0      | 0      | 0      | 0      |
| Archaeoglobus    | 1              | 14             | 0      | 0      | 0      | 0      | 0      | 0      | 0      | 0      | 0      | 0      | 0      | 0      | 0      | 0      | 0      | 0      | 1      | 0      |
| Arcobacter       | 2              | 101            | 0      | 0      | 0      | 0      | 0      | 0      | 0      | 0      | 0      | 0      | 0      | 0      | 0      | 0      | 0      | 0      | 0      | 0      |
| Aromatoleum      | 3              | 133            | 0      | 0      | 0      | 0      | 0      | 0      | 0      | 0      | 0      | 0      | 0      | 0      | 0      | 1      | 1      | 0      | 0      | 0      |
| Arsenophonus     | 1              | 4              | 0      | 0      | 0      | 0      | 0      | 0      | 0      | 0      | 0      | 0      | 0      | 0      | 0      | 0      | 0      | 0      | 0      | 0      |
| Arthrobacter     | 2              | 206            | 1      | 1      | 1      | 1      | 0      | 0      | 0      | 0      | 0      | 0      | 0      | 0      | 1      | 0      | 0      | 0      | 0      | 0      |
| Arthrospira      | 2              | 67             | 0      | 0      | 0      | 0      | 0      | 0      | 0      | 0      | 0      | 0      | 0      | 0      | 0      | 0      | 0      | 0      | 0      | 0      |
| Aster            | 1              | 10             | 0      | 0      | 0      | 0      | 0      | 0      | 0      | 0      | 0      | 0      | 0      | 0      | 0      | 0      | 0      | 0      | 0      | 0      |
| Asticcacaulis    | 2              | 103            | 1      | 0      | 1      | 0      | 0      | 0      | 0      | 0      | 0      | 0      | 0      | 0      | 0      | 0      | 0      | 0      | 0      | 0      |
| Atopobium        | 1              | 28             | 0      | 0      | 0      | 0      | 0      | 0      | 0      | 0      | 0      | 0      | 0      | 0      | 0      | 0      | 0      | 0      | 0      | 0      |
| Aurantimonas     | 1              | 2              | 0      | 0      | 0      | 0      | 0      | 0      | 0      | 0      | 0      | 0      | 0      | 0      | 0      | 0      | 0      | 0      | 0      | 0      |
| Avibacterium     | 1              | 17             | 0      | 0      | 0      | 0      | 0      | 0      | 0      | 0      | 0      | 0      | 0      | 0      | 0      | 0      | 0      | 0      | 0      | 0      |
| Azoarcus         | 3              | 172            | 1      | 1      | 1      | 1      | 0      | 0      | 0      | 0      | 0      | 0      | 0      | 0      | 0      | 0      | 0      | 0      | 0      | 0      |
| Azorhizobium     | 3              | 149            | 1      | 0      | 0      | 0      | 0      | 0      | 0      | 0      | 0      | 0      | 0      | 0      | 0      | 0      | 0      | 0      | 0      | 0      |
| Azorhizophilus   | 1              | 4              | 0      | 0      | 0      | 0      | 0      | 0      | 0      | 0      | 0      | 0      | 0      | 0      | 0      | 0      | 0      | 0      | 0      | 0      |
| Azospira         | 1              | 19             | 0      | 0      | 0      | 0      | 0      | 0      | 0      | 0      | 0      | 0      | 0      | 0      | 0      | 0      | 0      | 0      | 0      | 0      |
| Azospirillum     | 2              | 198            | 1      | 1      | 0      | 1      | 0      | 0      | 0      | 0      | 0      | 0      | 0      | 0      | 0      | 0      | 0      | 0      | 0      | 0      |
| Azotobacter      | 3              | 183            | 1      | 0      | 0      | 0      | 0      | 0      | 0      | 0      | 0      | 0      | 0      | 0      | 0      | 0      | 0      | 0      | 0      | 0      |
| Bacillales       | 1              | 9              | 0      | 0      | 0      | 0      | 0      | 0      | 0      | 0      | 0      | 0      | 0      | 0      | 0      | 0      | 0      | 0      | 0      | 0      |
| Bacilli          | 1              | 3              | 0      | 0      | 0      | 0      | 0      | 0      | 0      | 0      | 0      | 0      | 0      | 0      | 0      | 0      | 0      | 0      | 0      | 0      |
| Bacillus         | 2              | 237            | 0      | 0      | 0      | 0      | 0      | 0      | 0      | 0      | 0      | 0      | 0      | 0      | 0      | 0      | 0      | 0      | 0      | 0      |
| Bacteria         | 2              | 86             | 0      | 0      | 0      | 0      | 0      | 0      | 0      | 0      | 0      | 0      | 0      | 0      | 0      | 0      | 0      | 0      | 0      | 0      |
| Bacteriovorax    | 2              | 98             | 0      | 0      | 0      | 0      | 0      | 0      | 0      | 0      | 0      | 0      | 0      | 0      | 0      | 0      | 0      | 0      | 0      | 0      |
| Bacteroidales    | 2              | 59             | 0      | 0      | 0      | 0      | 0      | 0      | 0      | 0      | 0      | 0      | 0      | 0      | 0      | 0      | 0      | 0      | 0      | 0      |
| Bacteroides      | 2              | 96             | 0      | 0      | 0      | 0      | 0      | 0      | 0      | 0      | 0      | 0      | 0      | 0      | 0      | 0      | 0      | 0      | 0      | 0      |
| Bacteroidetes    | 1              | 2              | 0      | 0      | 0      | 0      | 0      | 0      | 0      | 0      | 0      | 0      | 0      | 0      | 0      | 0      | 0      | 0      | 0      | 0      |
| Bartonella       | 2              | 50             | 0      | 0      | 0      | 0      | 0      | 0      | 0      | 0      | 0      | 0      | 0      | 0      | 0      | 0      | 0      | 0      | 0      | 0      |
| Baumannia        | 2              | 24             | 0      | 0      | 0      | 0      | 0      | 0      | 0      | 0      | 0      | 0      | 0      | 0      | 0      | 0      | 0      | 0      | 0      | 0      |
| Bdellovibrio     | 2              | 87             | 0      | 0      | 0      | 0      | 0      | 0      | 0      | 0      | 0      | 0      | 0      | 0      | 0      | 0      | 0      | 0      | 0      | 0      |
| Beijerinckia     | 3              | 123            | 0      | 0      | 0      | 0      | 0      | 0      | 0      | 0      | 0      | 0      | 0      | 0      | 0      | 0      | 0      | 0      | 0      | 0      |
| Belliella        | 1              | 14             | 0      | 0      | 0      | 0      | 0      | 0      | 0      | 0      | 0      | 0      | 0      | 0      | 0      | 0      | 0      | 0      | 0      | 0      |
| Beutenbergia     | 2              | 82             | 0      | 0      | 0      | 0      | 0      | 0      | 0      | 0      | 0      | 0      | 0      | 0      | 0      | 0      | 0      | 0      | 0      | 0      |
| Bifidobacterium  | 2              | 61             | 0      | 0      | 0      | 0      | 0      | 0      | 0      | 0      | 0      | 0      | 0      | 0      | 0      | 0      | 0      | 0      | 0      | 0      |

| Genus                | Cluster Number | Protein Counts | K10218 | K10219 | K10220 | K10221 | K10222 | K10616 | K10617 | K10618 | K10619 | K10621 | K10622 | K10623 | K10676 | K10700 | K10701 | K10702 | K11180 | K11946 |
|----------------------|----------------|----------------|--------|--------|--------|--------|--------|--------|--------|--------|--------|--------|--------|--------|--------|--------|--------|--------|--------|--------|
| Bizionia             | 1              | 1              | 0      | 0      | 0      | 0      | 0      | 0      | 0      | 0      | 0      | 0      | 0      | 0      | 0      | 0      | 0      | 0      | 0      | 0      |
| Blastococcus         | 1              | 39             | 1      | 0      | 1      | 0      | 0      | 0      | 0      | 0      | 0      | 0      | 0      | 0      | 0      | 0      | 0      | 0      | 0      | 0      |
| Blattabacterium      | 1              | 23             | 0      | 0      | 0      | 0      | 0      | 0      | 0      | 0      | 0      | 0      | 0      | 0      | 0      | 0      | 0      | 0      | 0      | 0      |
| Blautia              | 1              | 22             | 0      | 0      | 0      | 0      | 0      | 0      | 0      | 0      | 0      | 0      | 0      | 0      | 0      | 0      | 0      | 0      | 0      | 0      |
| Bordetella           | 3              | 227            | 1      | 0      | 0      | 0      | 0      | 0      | 0      | 0      | 0      | 0      | 0      | 0      | 1      | 0      | 0      | 0      | 0      | 0      |
| Borrelia             | 1              | 32             | 0      | 0      | 0      | 0      | 0      | 0      | 0      | 0      | 0      | 0      | 0      | 0      | 0      | 0      | 0      | 0      | 0      | 0      |
| Brachybacterium      | 1              | 18             | 0      | 0      | 0      | 0      | 0      | 0      | 0      | 0      | 0      | 0      | 0      | 0      | 0      | 0      | 0      | 0      | 0      | 0      |
| Brachymonas          | 1              | 4              | 0      | 0      | 0      | 0      | 0      | 0      | 0      | 0      | 0      | 0      | 0      | 0      | 0      | 0      | 0      | 0      | 0      | 0      |
| Brachyspira          | 2              | 79             | 0      | 0      | 0      | 0      | 0      | 0      | 0      | 0      | 0      | 0      | 0      | 0      | 0      | 0      | 0      | 0      | 0      | 0      |
| Bradyrhizobiaceae    | 1              | 20             | 0      | 0      | 0      | 0      | 0      | 0      | 0      | 0      | 0      | 0      | 0      | 0      | 0      | 0      | 0      | 0      | 0      | 0      |
| Bradyrhizobium       | 3              | 254            | 1      | 1      | 1      | 1      | 0      | 0      | 0      | 0      | 0      | 0      | 1      | 0      | 1      | 0      | 0      | 0      | 0      | 0      |
| Brenneria            | 1              | 20             | 0      | 0      | 0      | 0      | 0      | 0      | 0      | 0      | 0      | 0      | 0      | 0      | 0      | 0      | 0      | 0      | 0      | 0      |
| Brevibacillus        | 2              | 122            | 0      | 0      | 0      | 0      | 0      | 0      | 0      | 0      | 0      | 0      | 0      | 0      | 0      | 0      | 0      | 0      | 0      | 0      |
| Brevibacterium       | 1              | 4              | 0      | 0      | 0      | 0      | 0      | 0      | 0      | 0      | 0      | 0      | 0      | 0      | 0      | 0      | 0      | 0      | 0      | 0      |
| Brevundimonas        | 2              | 105            | 1      | 1      | 1      | 1      | 0      | 0      | 0      | 0      | 0      | 0      | 0      | 0      | 0      | 0      | 0      | 0      | 0      | 0      |
| Brucella             | 3              | 138            | 0      | 0      | 0      | 0      | 0      | 0      | 0      | 0      | 0      | 0      | 0      | 0      | 0      | 0      | 0      | 0      | 0      | 0      |
| Buchnera             | 1              | 26             | 0      | 0      | 0      | 0      | 0      | 0      | 0      | 0      | 0      | 0      | 0      | 0      | 0      | 0      | 0      | 0      | 0      | 0      |
| Burkholderia         | 3              | 424            | 1      | 1      | 1      | 1      | 1      | 1      | 1      | 1      | 1      | 1      | 1      | 1      | 1      | 0      | 0      | 0      | 0      | 0      |
| Burkholderiaceae     | 3              | 143            | 0      | 0      | 0      | 0      | 0      | 0      | 0      | 0      | 0      | 0      | 0      | 0      | 0      | 0      | 0      | 0      | 0      | 0      |
| Burkholderiales      | 1              | 24             | 0      | 0      | 0      | 0      | 0      | 0      | 0      | 0      | 0      | 0      | 0      | 0      | 0      | 0      | 0      | 0      | 0      | 0      |
| Buttiauxella         | 1              | 2              | 0      | 0      | 0      | 0      | 0      | 0      | 0      | 0      | 0      | 0      | 0      | 0      | 0      | 0      | 0      | 0      | 0      | 0      |
| Butyrivibrio         | 2              | 67             | 0      | 0      | 0      | 0      | 0      | 0      | 0      | 0      | 0      | 0      | 0      | 0      | 0      | 0      | 0      | 0      | 0      | 0      |
| Caldanaerobacter     | 2              | 63             | 0      | 0      | 0      | 0      | 0      | 0      | 0      | 0      | 0      | 0      | 0      | 0      | 0      | 0      | 0      | 0      | 0      | 0      |
| Caldicellulosiruptor | 2              | 75             | 0      | 0      | 0      | 0      | 0      | 0      | 0      | 0      | 0      | 0      | 0      | 0      | 0      | 0      | 0      | 0      | 0      | 0      |
| Caldilinea           | 1              | 23             | 0      | 0      | 0      | 0      | 0      | 0      | 0      | 0      | 0      | 0      | 0      | 0      | 0      | 0      | 0      | 0      | 0      | 0      |
| Caldimonas           | 1              | 6              | 0      | 0      | 0      | 0      | 0      | 0      | 0      | 0      | 0      | 0      | 0      | 0      | 0      | 0      | 0      | 0      | 0      | 0      |
| Caldisericum         | 1              | 10             | 0      | 0      | 0      | 0      | 0      | 0      | 0      | 0      | 0      | 0      | 0      | 0      | 0      | 0      | 0      | 0      | 0      | 0      |
| Caldisphaera         | 1              | 7              | 0      | 0      | 0      | 0      | 0      | 0      | 0      | 0      | 0      | 0      | 0      | 0      | 0      | 0      | 0      | 0      | 0      | 0      |
| Calditerrivibrio     | 2              | 74             | 0      | 0      | 0      | 0      | 0      | 0      | 0      | 0      | 0      | 0      | 0      | 0      | 0      | 0      | 0      | 0      | 0      | 0      |
| Caldivirga           | 1              | 13             | 0      | 0      | 0      | 0      | 0      | 0      | 0      | 0      | 0      | 0      | 0      | 0      | 0      | 0      | 0      | 0      | 1      | 0      |
| Calothrix            | 1              | 43             | 0      | 0      | 0      | 0      | 0      | 0      | 0      | 0      | 0      | 0      | 0      | 0      | 0      | 0      | 0      | 0      | 0      | 0      |
| Calyptogena          | 2              | 34             | 0      | 0      | 0      | 0      | 0      | 0      | 0      | 0      | 0      | 0      | 0      | 0      | 0      | 0      | 0      | 0      | 1      | 0      |
| Campylobacter        | 2              | 80             | 0      | 0      | 0      | 0      | 0      | 0      | 0      | 0      | 0      | 0      | 0      | 0      | 0      | 0      | 0      | 0      | 0      | 0      |
| Candidatus           | 2              | 290            | 1      | 1      | 1      | 0      | 0      | 0      | 0      | 0      | 0      | 0      | 0      | 0      | 0      | 0      | 0      | 0      | 1      | 0      |
| Capnocytophaga       | 1              | 50             | 0      | 0      | 0      | 0      | 0      | 0      | 0      | 0      | 0      | 0      | 0      | 0      | 0      | 0      | 0      | 0      | 0      | 0      |
| Carbophilus          | 1              | 2              | 0      | 0      | 0      | 0      | 0      | 0      | 0      | 0      | 0      | 0      | 0      | 0      | 0      | 0      | 0      | 0      | 0      | 0      |
| Carboxydibrachium    | 1              | 14             | 0      | 0      | 0      | 0      | 0      | 0      | 0      | 0      | 0      | 0      | 0      | 0      | 0      | 0      | 0      | 0      | 0      | 0      |
| Carboxydotherrmus    | 2              | 68             | 0      | 0      | 0      | 0      | 0      | 0      | 0      | 0      | 0      | 0      | 0      | 0      | 0      | 0      | 0      | 0      | 1      | 0      |
| Carica               | 1              | 2              | 0      | 0      | 0      | 0      | 0      | 0      | 0      | 0      | 0      | 0      | 0      | 0      | 0      | 0      | 0      | 0      | 0      | 0      |
| Carnobacterium       | 2              | 71             | 0      | 0      | 0      | 0      | 0      | 0      | 0      | 0      | 0      | 0      | 0      | 0      | 0      | 0      | 0      | 0      | 0      | 0      |
| Catenibacterium      | 1              | 2              | 0      | 0      | 0      | 0      | 0      | 0      | 0      | 0      | 0      | 0      | 0      | 0      | 0      | 0      | 0      | 0      | 0      | 0      |
| Catenovulum          | 1              | 2              | 0      | 0      | 0      | 0      | 0      | 0      | 0      | 0      | 0      | 0      | 0      | 0      | 0      | 0      | 0      | 0      | 0      | 0      |
| Catenulispora        | 3              | 159            | 0      | 0      | 1      | 0      | 0      | 0      | 0      | 0      | 0      | 0      | 0      | 0      | 0      | 0      | 0      | 0      | 0      | 0      |
| Caulobacter          | 3              | 168            | 0      | 0      | 0      | 0      | 0      | 0      | 0      | 0      | 0      | 0      | 0      | 0      | 0      | 0      | 0      | 0      | 0      | 0      |
| Cedecea              | 1              | 45             | 0      | 0      | 0      | 0      | 0      | 0      | 0      | 0      | 0      | 0      | 0      | 0      | 0      | 0      | 0      | 0      | 0      | 0      |
| Cellulomonas         | 2              | 96             | 0      | 0      | 0      | 0      | 0      | 0      | 0      | 0      | 0      | 0      | 0      | 0      | 0      | 0      | 0      | 0      | 0      | 0      |
| Cellulophaga         | 2              | 105            | 0      | 0      | 0      | 0      | 0      | 0      | 0      | 0      | 0      | 0      | 0      | 0      | 0      | 0      | 0      | 0      | 0      | 0      |
| Cellulosilyticum     | 1              | 14             | 0      | 0      | 0      | 0      | 0      | 0      | 0      | 0      | 0      | 0      | 0      | 0      | 0      | 0      | 0      | 0      | 0      | 0      |
| Cellvibrio           | 2              | 85             | 0      | 0      | 0      | 0      | 0      | 0      | 0      | 0      | 0      | 0      | 0      | 0      | 0      | 0      | 0      | 0      | 0      | 0      |
| Cenarchaeum          | 1              | 7              | 0      | 0      | 0      | 0      | 0      | 0      | 0      | 0      | 0      | 0      | 0      | 0      | 0      | 0      | 0      | 0      | 0      | 0      |
| Chamaesiphon         | 1              | 13             | 0      | 0      | 0      | 0      | 0      | 0      | 0      | 0      | 0      | 0      | 0      | 0      | 0      | 0      | 0      | 0      | 0      | 0      |
| Chelativorans        | 3              | 136            | 0      | 0      | 0      | 0      | 0      | 0      | 0      | 0      | 0      | 0      | 0      | 0      | 0      | 0      | 0      | 0      | 0      | 0      |

| Genus                  | Cluster Number | Protein Counts | K10218 | K10219 | K10220 | K10221 | K10222 | K10616 | K10617 | K10618 | K10619 | K10621 | K10622 | K10623 | K10676 | K10700 | K10701 | K10702 | K11180 | K11946 |
|------------------------|----------------|----------------|--------|--------|--------|--------|--------|--------|--------|--------|--------|--------|--------|--------|--------|--------|--------|--------|--------|--------|
| Chelatococcus          | 1              | 2              | 0      | 0      | 0      | 0      | 0      | 0      | 0      | 0      | 0      | 0      | 0      | 0      | 0      | 0      | 0      | 0      | 0      | 0      |
| Chitinophaga           | 2              | 98             | 0      | 0      | 0      | 0      | 0      | 0      | 0      | 0      | 0      | 0      | 0      | 0      | 0      | 0      | 0      | 0      | 0      | 0      |
| Chlamydia              | 1              | 36             | 0      | 0      | 0      | 0      | 0      | 0      | 0      | 0      | 0      | 0      | 0      | 0      | 0      | 0      | 0      | 0      | 0      | 0      |
| Chlamydomonas          | 1              | 3              | 0      | 0      | 0      | 0      | 0      | 0      | 0      | 0      | 0      | 0      | 0      | 0      | 0      | 0      | 0      | 0      | 0      | 0      |
| Chlamydomphila         | 1              | 31             | 0      | 0      | 0      | 0      | 0      | 0      | 0      | 0      | 0      | 0      | 0      | 0      | 0      | 0      | 0      | 0      | 0      | 0      |
| Chlorobaculum          | 2              | 61             | 0      | 0      | 0      | 0      | 0      | 0      | 0      | 0      | 0      | 0      | 0      | 0      | 0      | 0      | 0      | 0      | 1      | 0      |
| Chlorobium             | 2              | 89             | 0      | 0      | 0      | 0      | 0      | 0      | 0      | 0      | 0      | 0      | 0      | 0      | 0      | 0      | 0      | 0      | 1      | 0      |
| Chlorobium/Pelodictyon | 1              | 2              | 0      | 0      | 0      | 0      | 0      | 0      | 0      | 0      | 0      | 0      | 0      | 0      | 0      | 0      | 0      | 0      | 0      | 0      |
| Chloroflexus           | 2              | 105            | 0      | 0      | 0      | 0      | 0      | 0      | 0      | 0      | 0      | 0      | 0      | 0      | 0      | 0      | 0      | 0      | 0      | 0      |
| Chlorogloeopsis        | 1              | 9              | 0      | 0      | 0      | 0      | 0      | 0      | 0      | 0      | 0      | 0      | 0      | 0      | 0      | 0      | 0      | 0      | 0      | 0      |
| Chloroherpeton         | 2              | 59             | 0      | 0      | 0      | 0      | 0      | 0      | 0      | 0      | 0      | 0      | 0      | 0      | 0      | 0      | 0      | 0      | 0      | 0      |
| Chromobacterium        | 2              | 117            | 0      | 0      | 0      | 0      | 0      | 0      | 0      | 0      | 0      | 0      | 0      | 0      | 0      | 0      | 0      | 0      | 0      | 0      |
| Chromohalobacter       | 2              | 145            | 1      | 1      | 0      | 0      | 0      | 0      | 0      | 0      | 0      | 0      | 0      | 0      | 0      | 0      | 0      | 0      | 0      | 0      |
| Chroococciopsis        | 1              | 24             | 0      | 0      | 0      | 0      | 0      | 0      | 0      | 0      | 0      | 0      | 0      | 0      | 0      | 0      | 0      | 0      | 0      | 0      |
| Chryseobacterium       | 2              | 104            | 1      | 1      | 1      | 1      | 0      | 0      | 0      | 0      | 0      | 0      | 0      | 0      | 0      | 0      | 0      | 0      | 0      | 0      |
| Citricella             | 1              | 13             | 0      | 0      | 0      | 0      | 0      | 0      | 0      | 0      | 0      | 0      | 0      | 0      | 0      | 0      | 0      | 0      | 0      | 0      |
| Citrobacter            | 2              | 190            | 1      | 0      | 0      | 0      | 0      | 0      | 0      | 0      | 0      | 0      | 0      | 0      | 0      | 0      | 0      | 0      | 0      | 0      |
| Clavibacter            | 2              | 83             | 0      | 0      | 0      | 0      | 0      | 0      | 0      | 0      | 0      | 0      | 0      | 0      | 0      | 0      | 0      | 0      | 0      | 0      |
| Clonorchis             | 1              | 1              | 0      | 0      | 0      | 0      | 0      | 0      | 0      | 0      | 0      | 0      | 0      | 0      | 0      | 0      | 0      | 0      | 0      | 0      |
| Clostridiales          | 2              | 77             | 0      | 0      | 0      | 0      | 0      | 0      | 0      | 0      | 0      | 0      | 0      | 0      | 0      | 0      | 0      | 0      | 0      | 0      |
| Clostridium            | 2              | 191            | 0      | 0      | 0      | 0      | 0      | 0      | 0      | 0      | 0      | 0      | 0      | 0      | 0      | 0      | 0      | 0      | 0      | 0      |
| Cohnella               | 1              | 2              | 0      | 0      | 0      | 0      | 0      | 0      | 0      | 0      | 0      | 0      | 0      | 0      | 0      | 0      | 0      | 0      | 0      | 0      |
| Coleofasciculus        | 1              | 4              | 0      | 0      | 0      | 0      | 0      | 0      | 0      | 0      | 0      | 0      | 0      | 0      | 0      | 0      | 0      | 0      | 0      | 0      |
| Collimonas             | 1              | 35             | 0      | 0      | 0      | 0      | 0      | 0      | 0      | 0      | 0      | 0      | 0      | 0      | 0      | 0      | 0      | 0      | 0      | 0      |
| Colwellia              | 2              | 130            | 0      | 0      | 0      | 0      | 0      | 0      | 0      | 0      | 0      | 0      | 0      | 0      | 0      | 0      | 0      | 0      | 0      | 0      |
| Comamonas              | 2              | 196            | 1      | 1      | 1      | 1      | 1      | 0      | 0      | 0      | 0      | 0      | 0      | 0      | 0      | 0      | 0      | 0      | 0      | 0      |
| Conexibacter           | 3              | 117            | 1      | 0      | 0      | 0      | 0      | 0      | 0      | 0      | 0      | 0      | 1      | 0      | 0      | 0      | 0      | 0      | 0      | 0      |
| Coprobacillus          | 1              | 2              | 0      | 0      | 0      | 0      | 0      | 0      | 0      | 0      | 0      | 0      | 0      | 0      | 0      | 0      | 0      | 0      | 0      | 0      |
| Coprococcus            | 2              | 76             | 0      | 0      | 0      | 0      | 0      | 0      | 0      | 0      | 0      | 0      | 0      | 0      | 0      | 0      | 0      | 0      | 0      | 0      |
| Coprothermobacter      | 2              | 45             | 0      | 0      | 0      | 0      | 0      | 0      | 0      | 0      | 0      | 0      | 0      | 0      | 0      | 0      | 0      | 0      | 0      | 0      |
| Coralimargarita        | 2              | 68             | 0      | 0      | 0      | 0      | 0      | 0      | 0      | 0      | 0      | 0      | 0      | 0      | 0      | 0      | 0      | 0      | 0      | 0      |
| Corallococcus          | 1              | 29             | 0      | 0      | 0      | 0      | 0      | 0      | 0      | 0      | 0      | 0      | 0      | 0      | 0      | 0      | 0      | 0      | 0      | 0      |
| Coriobacterium         | 2              | 36             | 0      | 0      | 0      | 0      | 0      | 0      | 0      | 0      | 0      | 0      | 0      | 0      | 0      | 0      | 0      | 0      | 0      | 0      |
| Corynebacterineae      | 1              | 5              | 0      | 0      | 0      | 0      | 0      | 0      | 0      | 0      | 0      | 0      | 0      | 0      | 0      | 0      | 0      | 0      | 0      | 0      |
| Corynebacterium        | 2              | 175            | 0      | 0      | 0      | 0      | 0      | 0      | 0      | 0      | 0      | 0      | 0      | 0      | 1      | 0      | 0      | 0      | 0      | 0      |
| Coxiella               | 2              | 54             | 0      | 0      | 0      | 0      | 0      | 0      | 0      | 0      | 0      | 0      | 0      | 0      | 0      | 0      | 0      | 0      | 0      | 0      |
| Crinalium              | 1              | 21             | 0      | 0      | 0      | 0      | 0      | 0      | 0      | 0      | 0      | 0      | 0      | 0      | 0      | 0      | 0      | 0      | 0      | 0      |
| Croceibacter           | 2              | 80             | 0      | 0      | 0      | 0      | 0      | 0      | 0      | 0      | 0      | 0      | 0      | 0      | 0      | 0      | 0      | 0      | 0      | 0      |
| Crocospaera            | 1              | 6              | 0      | 0      | 0      | 0      | 0      | 0      | 0      | 0      | 0      | 0      | 0      | 0      | 0      | 0      | 0      | 0      | 0      | 0      |
| Cronobacter            | 2              | 120            | 0      | 0      | 0      | 0      | 0      | 0      | 0      | 0      | 0      | 0      | 0      | 0      | 0      | 0      | 0      | 0      | 0      | 0      |
| Cryptobacterium        | 2              | 39             | 0      | 0      | 0      | 0      | 0      | 0      | 0      | 0      | 0      | 0      | 0      | 0      | 0      | 0      | 0      | 0      | 0      | 0      |
| Cucumis                | 1              | 9              | 0      | 0      | 0      | 0      | 0      | 0      | 0      | 0      | 0      | 0      | 0      | 0      | 0      | 0      | 0      | 0      | 0      | 0      |
| Cupriavidus            | 3              | 317            | 1      | 0      | 1      | 0      | 1      | 0      | 0      | 0      | 0      | 1      | 1      | 0      | 1      | 0      | 0      | 0      | 0      | 0      |
| Curtobacterium         | 1              | 5              | 0      | 0      | 0      | 0      | 0      | 0      | 0      | 0      | 0      | 0      | 0      | 0      | 0      | 0      | 0      | 0      | 0      | 0      |
| Curvibacter            | 1              | 27             | 1      | 1      | 1      | 1      | 0      | 0      | 0      | 0      | 0      | 0      | 0      | 0      | 0      | 0      | 0      | 0      | 0      | 0      |
| Cyanobacterium         | 1              | 9              | 0      | 0      | 0      | 0      | 0      | 0      | 0      | 0      | 0      | 0      | 0      | 0      | 0      | 0      | 0      | 0      | 0      | 0      |
| Cyanobium              | 1              | 10             | 0      | 0      | 0      | 0      | 0      | 0      | 0      | 0      | 0      | 0      | 0      | 0      | 0      | 0      | 0      | 0      | 0      | 0      |
| Cyanothece             | 1              | 34             | 0      | 0      | 0      | 0      | 0      | 0      | 0      | 0      | 0      | 0      | 0      | 0      | 0      | 0      | 0      | 0      | 0      | 0      |
| Cyclobacterium         | 1              | 19             | 0      | 0      | 0      | 0      | 0      | 0      | 0      | 0      | 0      | 0      | 0      | 0      | 0      | 0      | 0      | 0      | 0      | 0      |
| Cycloclasticus         | 1              | 21             | 0      | 0      | 0      | 0      | 1      | 0      | 0      | 0      | 0      | 1      | 0      | 0      | 0      | 0      | 0      | 0      | 0      | 0      |
| Cylindrospermopsis     | 1              | 4              | 0      | 0      | 0      | 0      | 0      | 0      | 0      | 0      | 0      | 0      | 0      | 0      | 0      | 0      | 0      | 0      | 0      | 0      |
| Cylindrospermum        | 1              | 30             | 0      | 0      | 0      | 0      | 0      | 0      | 0      | 0      | 0      | 0      | 0      | 0      | 0      | 0      | 0      | 0      | 0      | 0      |

| Genus              | Cluster Number | Protein Counts | K10218 | K10219 | K10220 | K10221 | K10222 | K10616 | K10617 | K10618 | K10619 | K10621 | K10622 | K10623 | K10676 | K10700 | K10701 | K10702 | K11180 | K11946 |
|--------------------|----------------|----------------|--------|--------|--------|--------|--------|--------|--------|--------|--------|--------|--------|--------|--------|--------|--------|--------|--------|--------|
| Cytophaga          | 2              | 69             | 0      | 0      | 0      | 0      | 0      | 0      | 0      | 0      | 0      | 0      | 0      | 0      | 0      | 0      | 0      | 0      | 0      | 0      |
| Dactylococcopsis   | 1              | 8              | 0      | 0      | 0      | 0      | 0      | 0      | 0      | 0      | 0      | 0      | 0      | 0      | 0      | 0      | 0      | 0      | 0      | 0      |
| Dechloromonas      | 1              | 40             | 0      | 0      | 0      | 0      | 0      | 0      | 0      | 0      | 0      | 0      | 0      | 0      | 1      | 0      | 0      | 0      | 0      | 0      |
| Dechlorosoma       | 1              | 19             | 0      | 0      | 0      | 0      | 0      | 0      | 0      | 0      | 0      | 0      | 0      | 0      | 0      | 0      | 0      | 0      | 0      | 0      |
| Deferribacter      | 2              | 73             | 0      | 0      | 0      | 0      | 0      | 0      | 0      | 0      | 0      | 0      | 0      | 0      | 0      | 0      | 0      | 0      | 0      | 0      |
| Dehalobacter       | 1              | 9              | 0      | 0      | 0      | 0      | 0      | 0      | 0      | 0      | 0      | 0      | 0      | 0      | 0      | 0      | 0      | 0      | 0      | 0      |
| Dehalococcoides    | 2              | 41             | 0      | 0      | 0      | 0      | 0      | 0      | 0      | 0      | 0      | 0      | 0      | 0      | 0      | 0      | 0      | 0      | 0      | 0      |
| Dehalogenimonas    | 1              | 37             | 0      | 0      | 0      | 0      | 0      | 0      | 0      | 0      | 0      | 0      | 0      | 0      | 0      | 0      | 0      | 0      | 0      | 0      |
| Deinococcus        | 2              | 140            | 0      | 1      | 0      | 0      | 0      | 0      | 0      | 0      | 0      | 0      | 0      | 0      | 0      | 0      | 0      | 0      | 0      | 0      |
| Delftia            | 3              | 177            | 1      | 1      | 1      | 1      | 1      | 0      | 0      | 0      | 0      | 0      | 0      | 0      | 0      | 0      | 0      | 0      | 0      | 0      |
| Denitrovibrio      | 2              | 67             | 0      | 0      | 0      | 0      | 0      | 0      | 0      | 0      | 0      | 0      | 0      | 0      | 0      | 0      | 0      | 0      | 0      | 0      |
| Desulfarculus      | 2              | 92             | 0      | 0      | 0      | 0      | 0      | 0      | 0      | 0      | 0      | 0      | 0      | 0      | 0      | 0      | 0      | 0      | 1      | 0      |
| Desulfatibacillum  | 3              | 84             | 0      | 0      | 0      | 0      | 0      | 0      | 0      | 0      | 0      | 0      | 0      | 0      | 0      | 0      | 0      | 0      | 1      | 0      |
| Desulfitobacterium | 2              | 102            | 0      | 0      | 0      | 0      | 0      | 0      | 0      | 0      | 0      | 0      | 0      | 0      | 0      | 0      | 0      | 0      | 1      | 0      |
| Desulfobacca       | 2              | 65             | 0      | 0      | 0      | 0      | 0      | 0      | 0      | 0      | 0      | 0      | 0      | 0      | 0      | 0      | 0      | 0      | 1      | 0      |
| Desulfobacterium   | 2              | 113            | 0      | 0      | 0      | 0      | 0      | 0      | 0      | 0      | 0      | 0      | 0      | 0      | 0      | 0      | 0      | 0      | 1      | 0      |
| Desulfobacula      | 1              | 21             | 0      | 0      | 0      | 0      | 0      | 0      | 0      | 0      | 0      | 0      | 0      | 0      | 0      | 0      | 0      | 0      | 1      | 0      |
| Desulfobulbus      | 2              | 88             | 0      | 0      | 0      | 0      | 0      | 0      | 0      | 0      | 0      | 0      | 0      | 0      | 0      | 0      | 0      | 0      | 1      | 0      |
| Desulfocapsa       | 1              | 9              | 0      | 0      | 0      | 0      | 0      | 0      | 0      | 0      | 0      | 0      | 0      | 0      | 0      | 0      | 0      | 0      | 1      | 0      |
| Desulfococcus      | 2              | 80             | 0      | 0      | 0      | 0      | 0      | 0      | 0      | 0      | 0      | 0      | 0      | 0      | 0      | 0      | 0      | 0      | 1      | 0      |
| Desulfohalobium    | 2              | 52             | 0      | 0      | 0      | 0      | 0      | 0      | 0      | 0      | 0      | 0      | 0      | 0      | 0      | 0      | 0      | 0      | 1      | 0      |
| Desulfomicrobium   | 2              | 65             | 0      | 0      | 0      | 0      | 0      | 0      | 0      | 0      | 0      | 0      | 0      | 0      | 0      | 0      | 0      | 0      | 1      | 0      |
| Desulfomonile      | 1              | 25             | 1      | 0      | 0      | 0      | 0      | 0      | 0      | 0      | 0      | 0      | 0      | 0      | 0      | 0      | 0      | 0      | 1      | 0      |
| Desulforhabdus     | 1              | 2              | 0      | 0      | 0      | 0      | 0      | 0      | 0      | 0      | 0      | 0      | 0      | 0      | 0      | 0      | 0      | 0      | 1      | 0      |
| Desulfosporosinus  | 1              | 30             | 0      | 0      | 0      | 0      | 0      | 0      | 0      | 0      | 0      | 0      | 0      | 0      | 0      | 0      | 0      | 0      | 1      | 0      |
| Desulfotalea       | 2              | 66             | 0      | 0      | 0      | 0      | 0      | 0      | 0      | 0      | 0      | 0      | 0      | 0      | 0      | 0      | 0      | 0      | 1      | 0      |
| Desulfotomaculum   | 2              | 98             | 0      | 0      | 0      | 0      | 0      | 0      | 0      | 0      | 0      | 0      | 0      | 0      | 0      | 0      | 0      | 0      | 1      | 0      |
| Desulfovibrio      | 2              | 144            | 0      | 0      | 0      | 0      | 0      | 0      | 0      | 0      | 0      | 0      | 0      | 0      | 0      | 0      | 0      | 0      | 1      | 0      |
| Desulfurispirillum | 2              | 78             | 0      | 0      | 0      | 0      | 0      | 0      | 0      | 0      | 0      | 0      | 0      | 0      | 0      | 0      | 0      | 0      | 0      | 0      |
| Desulfurivibrio    | 2              | 71             | 0      | 0      | 0      | 0      | 0      | 0      | 0      | 0      | 0      | 0      | 0      | 0      | 0      | 0      | 0      | 0      | 1      | 0      |
| Desulfurobacterium | 2              | 53             | 0      | 0      | 0      | 0      | 0      | 0      | 0      | 0      | 0      | 0      | 0      | 0      | 0      | 0      | 0      | 0      | 0      | 0      |
| Desulfurococcus    | 1              | 11             | 0      | 0      | 0      | 0      | 0      | 0      | 0      | 0      | 0      | 0      | 0      | 0      | 0      | 0      | 0      | 0      | 0      | 0      |
| Diaphorobacter     | 1              | 16             | 0      | 0      | 0      | 0      | 0      | 0      | 0      | 0      | 0      | 0      | 0      | 0      | 0      | 0      | 0      | 0      | 0      | 0      |
| Dichelobacter      | 2              | 45             | 0      | 0      | 0      | 0      | 0      | 0      | 0      | 0      | 0      | 0      | 0      | 0      | 0      | 0      | 0      | 0      | 0      | 0      |
| Dickeya            | 2              | 155            | 0      | 0      | 0      | 0      | 0      | 0      | 0      | 0      | 0      | 0      | 0      | 0      | 0      | 0      | 0      | 0      | 0      | 0      |
| Dictyoglomus       | 2              | 62             | 0      | 0      | 0      | 0      | 0      | 0      | 0      | 0      | 0      | 0      | 0      | 0      | 0      | 0      | 0      | 0      | 0      | 0      |
| Dinoroseobacter    | 3              | 148            | 0      | 0      | 0      | 0      | 0      | 0      | 0      | 0      | 0      | 0      | 0      | 0      | 0      | 0      | 0      | 0      | 0      | 0      |
| Dokdonia           | 1              | 3              | 0      | 0      | 0      | 0      | 0      | 0      | 0      | 0      | 0      | 0      | 0      | 0      | 0      | 0      | 0      | 0      | 0      | 0      |
| Dorea              | 1              | 7              | 0      | 0      | 0      | 0      | 0      | 0      | 0      | 0      | 0      | 0      | 0      | 0      | 0      | 0      | 0      | 0      | 0      | 0      |
| Dyadobacter        | 2              | 83             | 0      | 0      | 0      | 0      | 0      | 0      | 0      | 0      | 0      | 0      | 0      | 0      | 0      | 0      | 0      | 0      | 0      | 0      |
| Echinicola         | 1              | 20             | 0      | 0      | 0      | 0      | 0      | 0      | 0      | 0      | 0      | 0      | 0      | 0      | 0      | 0      | 0      | 0      | 0      | 0      |
| Edwardsiella       | 2              | 126            | 0      | 0      | 0      | 0      | 0      | 0      | 0      | 0      | 0      | 0      | 0      | 0      | 0      | 0      | 0      | 0      | 0      | 0      |
| Eggerthella        | 1              | 51             | 0      | 0      | 0      | 0      | 0      | 0      | 0      | 0      | 0      | 0      | 0      | 0      | 0      | 0      | 0      | 0      | 0      | 0      |
| Ehrlichia          | 2              | 37             | 0      | 0      | 0      | 0      | 0      | 0      | 0      | 0      | 0      | 0      | 0      | 0      | 0      | 0      | 0      | 0      | 0      | 0      |
| Eikenella          | 1              | 4              | 0      | 0      | 0      | 0      | 0      | 0      | 0      | 0      | 0      | 0      | 0      | 0      | 0      | 0      | 0      | 0      | 0      | 0      |
| Elusimicrobium     | 2              | 44             | 0      | 0      | 0      | 0      | 0      | 0      | 0      | 0      | 0      | 0      | 0      | 0      | 0      | 0      | 0      | 0      | 0      | 0      |
| Emticicia          | 1              | 21             | 1      | 0      | 0      | 0      | 0      | 0      | 0      | 0      | 0      | 0      | 0      | 0      | 0      | 0      | 0      | 0      | 0      | 0      |
| Enhydrobacter      | 1              | 1              | 0      | 0      | 0      | 0      | 0      | 0      | 0      | 0      | 0      | 0      | 0      | 0      | 0      | 0      | 0      | 0      | 0      | 0      |
| Ensifer            | 1              | 2              | 0      | 0      | 0      | 0      | 0      | 0      | 0      | 0      | 0      | 0      | 0      | 0      | 0      | 0      | 0      | 0      | 0      | 0      |
| Enterobacter       | 2              | 202            | 0      | 0      | 0      | 0      | 0      | 0      | 0      | 0      | 0      | 0      | 0      | 0      | 0      | 0      | 0      | 0      | 0      | 0      |
| Enterobacteriaceae | 2              | 211            | 0      | 0      | 0      | 0      | 0      | 0      | 0      | 0      | 0      | 0      | 0      | 0      | 0      | 0      | 0      | 0      | 0      | 0      |
| Enterococcus       | 1              | 187            | 1      | 0      | 0      | 0      | 0      | 0      | 0      | 0      | 0      | 0      | 0      | 0      | 0      | 0      | 0      | 0      | 0      | 0      |

| Genus               | Cluster Number | Protein Counts | K10218 | K10219 | K10220 | K10221 | K10222 | K10616 | K10617 | K10618 | K10619 | K10621 | K10622 | K10623 | K10676 | K10700 | K10701 | K10702 | K11180 | K11946 |
|---------------------|----------------|----------------|--------|--------|--------|--------|--------|--------|--------|--------|--------|--------|--------|--------|--------|--------|--------|--------|--------|--------|
| Enterovibrio        | 1              | 15             | 0      | 0      | 0      | 0      | 0      | 0      | 0      | 0      | 0      | 0      | 0      | 0      | 0      | 0      | 0      | 0      | 0      | 0      |
| Erwinia             | 2              | 151            | 1      | 0      | 0      | 0      | 0      | 0      | 0      | 0      | 0      | 0      | 0      | 0      | 0      | 0      | 0      | 0      | 0      | 0      |
| Erysipelothrix      | 1              | 9              | 0      | 0      | 0      | 0      | 0      | 0      | 0      | 0      | 0      | 0      | 0      | 0      | 0      | 0      | 0      | 0      | 0      | 0      |
| Erysipelotrichaceae | 1              | 4              | 0      | 0      | 0      | 0      | 0      | 0      | 0      | 0      | 0      | 0      | 0      | 0      | 0      | 0      | 0      | 0      | 0      | 0      |
| Erythrobacter       | 2              | 80             | 0      | 0      | 0      | 0      | 0      | 0      | 0      | 0      | 0      | 0      | 0      | 0      | 0      | 0      | 0      | 0      | 0      | 0      |
| Escherichia         | 2              | 242            | 1      | 0      | 0      | 0      | 0      | 0      | 0      | 0      | 0      | 0      | 0      | 0      | 0      | 0      | 0      | 0      | 0      | 0      |
| Ethanoligenens      | 2              | 69             | 0      | 0      | 0      | 0      | 0      | 0      | 0      | 0      | 0      | 0      | 0      | 0      | 0      | 0      | 0      | 0      | 0      | 0      |
| Eubacteriaceae      | 1              | 2              | 0      | 0      | 0      | 0      | 0      | 0      | 0      | 0      | 0      | 0      | 0      | 0      | 0      | 0      | 0      | 0      | 0      | 0      |
| Eubacterium         | 2              | 103            | 0      | 0      | 0      | 0      | 0      | 0      | 0      | 0      | 0      | 0      | 0      | 0      | 0      | 0      | 0      | 0      | 0      | 0      |
| Eudoraea            | 1              | 4              | 0      | 0      | 0      | 0      | 0      | 0      | 0      | 0      | 0      | 0      | 0      | 0      | 0      | 0      | 0      | 0      | 0      | 0      |
| Euryarchaeota       | 1              | 1              | 0      | 0      | 0      | 0      | 0      | 0      | 0      | 0      | 0      | 0      | 0      | 0      | 0      | 0      | 0      | 0      | 0      | 0      |
| Exiguobacterium     | 2              | 93             | 0      | 0      | 0      | 0      | 0      | 0      | 0      | 0      | 0      | 0      | 0      | 0      | 0      | 0      | 0      | 0      | 0      | 0      |
| Faecalibacterium    | 1              | 12             | 0      | 0      | 0      | 0      | 0      | 0      | 0      | 0      | 0      | 0      | 0      | 0      | 0      | 0      | 0      | 0      | 0      | 0      |
| Ferrimonas          | 2              | 115            | 0      | 0      | 0      | 0      | 0      | 0      | 0      | 0      | 0      | 0      | 0      | 0      | 0      | 0      | 0      | 0      | 0      | 0      |
| Ferroglobus         | 1              | 14             | 0      | 0      | 0      | 0      | 0      | 0      | 0      | 0      | 0      | 0      | 0      | 0      | 0      | 0      | 0      | 0      | 0      | 0      |
| Ferroplasma         | 1              | 11             | 0      | 0      | 0      | 0      | 0      | 0      | 0      | 0      | 0      | 0      | 0      | 0      | 0      | 0      | 0      | 0      | 0      | 0      |
| Fervidicoccus       | 1              | 7              | 0      | 0      | 0      | 0      | 0      | 0      | 0      | 0      | 0      | 0      | 0      | 0      | 0      | 0      | 0      | 0      | 0      | 0      |
| Fervidobacterium    | 2              | 54             | 0      | 0      | 0      | 0      | 0      | 0      | 0      | 0      | 0      | 0      | 0      | 0      | 0      | 0      | 0      | 0      | 0      | 0      |
| Fibrella            | 1              | 17             | 0      | 0      | 0      | 0      | 0      | 0      | 0      | 0      | 0      | 0      | 0      | 0      | 0      | 0      | 0      | 0      | 0      | 0      |
| Fibroacter          | 2              | 52             | 0      | 0      | 0      | 0      | 0      | 0      | 0      | 0      | 0      | 0      | 0      | 0      | 0      | 0      | 0      | 0      | 0      | 0      |
| Filifactor          | 1              | 9              | 0      | 0      | 0      | 0      | 0      | 0      | 0      | 0      | 0      | 0      | 0      | 0      | 0      | 0      | 0      | 0      | 0      | 0      |
| Finegoldia          | 2              | 55             | 0      | 0      | 0      | 0      | 0      | 0      | 0      | 0      | 0      | 0      | 0      | 0      | 0      | 0      | 0      | 0      | 0      | 0      |
| Firmicutes          | 1              | 15             | 0      | 0      | 0      | 0      | 0      | 0      | 0      | 0      | 0      | 0      | 0      | 0      | 0      | 0      | 0      | 0      | 0      | 0      |
| Fischerella         | 1              | 15             | 0      | 0      | 0      | 0      | 0      | 0      | 0      | 0      | 0      | 0      | 0      | 0      | 0      | 0      | 0      | 0      | 0      | 0      |
| Flavobacteria       | 1              | 7              | 0      | 0      | 0      | 0      | 0      | 0      | 0      | 0      | 0      | 0      | 0      | 0      | 0      | 0      | 0      | 0      | 0      | 0      |
| Flavobacteriaceae   | 2              | 69             | 0      | 0      | 0      | 0      | 0      | 0      | 0      | 0      | 0      | 0      | 0      | 0      | 0      | 0      | 0      | 0      | 0      | 0      |
| Flavobacteriales    | 1              | 3              | 0      | 0      | 0      | 0      | 0      | 0      | 0      | 0      | 0      | 0      | 0      | 0      | 0      | 0      | 0      | 0      | 0      | 0      |
| Flavobacterium      | 2              | 103            | 0      | 0      | 0      | 0      | 0      | 0      | 0      | 0      | 0      | 0      | 0      | 0      | 0      | 0      | 0      | 0      | 0      | 0      |
| Flexibacter         | 1              | 17             | 0      | 0      | 0      | 0      | 0      | 0      | 0      | 0      | 0      | 0      | 0      | 0      | 0      | 0      | 0      | 0      | 0      | 0      |
| Flexistipes         | 1              | 11             | 0      | 0      | 0      | 0      | 0      | 0      | 0      | 0      | 0      | 0      | 0      | 0      | 0      | 0      | 0      | 0      | 0      | 0      |
| Fluoribacter        | 1              | 6              | 0      | 0      | 0      | 0      | 0      | 0      | 0      | 0      | 0      | 0      | 0      | 0      | 0      | 0      | 0      | 0      | 0      | 0      |
| Fluviicola          | 2              | 69             | 0      | 0      | 0      | 0      | 0      | 0      | 0      | 0      | 0      | 0      | 0      | 0      | 0      | 0      | 0      | 0      | 0      | 0      |
| Formosa             | 1              | 2              | 0      | 0      | 0      | 0      | 0      | 0      | 0      | 0      | 0      | 0      | 0      | 0      | 0      | 0      | 0      | 0      | 0      | 0      |
| Francisella         | 2              | 88             | 0      | 0      | 0      | 0      | 0      | 0      | 0      | 0      | 0      | 0      | 0      | 0      | 0      | 0      | 0      | 0      | 0      | 0      |
| Frankia             | 3              | 202            | 0      | 0      | 0      | 0      | 0      | 0      | 0      | 0      | 0      | 0      | 0      | 0      | 0      | 0      | 0      | 0      | 0      | 0      |
| Frateuria           | 1              | 25             | 0      | 0      | 0      | 0      | 0      | 0      | 0      | 0      | 0      | 0      | 0      | 0      | 0      | 0      | 0      | 0      | 0      | 0      |
| Fructobacillus      | 1              | 2              | 0      | 0      | 0      | 0      | 0      | 0      | 0      | 0      | 0      | 0      | 0      | 0      | 0      | 0      | 0      | 0      | 0      | 0      |
| Fulvimarina         | 1              | 2              | 0      | 0      | 0      | 0      | 0      | 0      | 0      | 0      | 0      | 0      | 0      | 0      | 0      | 0      | 0      | 0      | 0      | 0      |
| Fusobacterium       | 1              | 48             | 0      | 0      | 0      | 0      | 0      | 0      | 0      | 0      | 0      | 0      | 0      | 0      | 0      | 0      | 0      | 0      | 0      | 0      |
| Gallibacterium      | 2              | 87             | 0      | 0      | 0      | 0      | 0      | 0      | 0      | 0      | 0      | 0      | 0      | 0      | 0      | 0      | 0      | 0      | 0      | 0      |
| Gallionella         | 2              | 67             | 0      | 0      | 0      | 0      | 0      | 0      | 0      | 0      | 0      | 0      | 0      | 0      | 0      | 0      | 0      | 0      | 0      | 0      |
| Gammaproteobacteria | 1              | 9              | 0      | 0      | 0      | 0      | 0      | 0      | 0      | 0      | 0      | 0      | 0      | 0      | 0      | 0      | 0      | 0      | 0      | 0      |
| Gardnerella         | 1              | 31             | 0      | 0      | 0      | 0      | 0      | 0      | 0      | 0      | 0      | 0      | 0      | 0      | 0      | 0      | 0      | 0      | 0      | 0      |
| Geitlerinema        | 1              | 9              | 0      | 0      | 0      | 0      | 0      | 0      | 0      | 0      | 0      | 0      | 0      | 0      | 0      | 0      | 0      | 0      | 0      | 0      |
| Gemmatimonas        | 2              | 93             | 0      | 0      | 0      | 0      | 0      | 0      | 0      | 0      | 0      | 0      | 0      | 0      | 0      | 0      | 0      | 0      | 0      | 0      |
| Geobacillus         | 2              | 168            | 1      | 0      | 0      | 0      | 0      | 0      | 0      | 0      | 0      | 0      | 0      | 0      | 0      | 0      | 0      | 0      | 0      | 0      |
| Geobacter           | 2              | 150            | 0      | 0      | 0      | 0      | 0      | 0      | 0      | 0      | 0      | 0      | 0      | 0      | 0      | 0      | 0      | 0      | 0      | 0      |
| Geodermatophilus    | 2              | 136            | 0      | 0      | 0      | 0      | 0      | 0      | 0      | 0      | 0      | 0      | 0      | 0      | 0      | 0      | 0      | 0      | 0      | 0      |
| Geopsychrobacter    | 1              | 2              | 0      | 0      | 0      | 0      | 0      | 0      | 0      | 0      | 0      | 0      | 0      | 0      | 0      | 0      | 0      | 0      | 0      | 0      |
| Gillisia            | 1              | 11             | 0      | 0      | 0      | 0      | 0      | 0      | 0      | 0      | 0      | 0      | 0      | 0      | 0      | 0      | 0      | 0      | 0      | 0      |
| Gilvimarinus        | 1              | 4              | 0      | 0      | 0      | 0      | 0      | 0      | 0      | 0      | 0      | 0      | 0      | 0      | 0      | 0      | 0      | 0      | 0      | 0      |
| Glaciecola          | 2              | 117            | 0      | 1      | 1      | 0      | 0      | 0      | 0      | 0      | 0      | 0      | 0      | 0      | 0      | 0      | 0      | 0      | 0      | 0      |

| Genus             | Cluster Number | Protein Counts | K10218 | K10219 | K10220 | K10221 | K10222 | K10616 | K10617 | K10618 | K10619 | K10621 | K10622 | K10623 | K10676 | K10700 | K10701 | K10702 | K11180 | K11946 |
|-------------------|----------------|----------------|--------|--------|--------|--------|--------|--------|--------|--------|--------|--------|--------|--------|--------|--------|--------|--------|--------|--------|
| Gloeobacter       | 2              | 67             | 0      | 0      | 0      | 0      | 0      | 0      | 0      | 0      | 0      | 0      | 0      | 0      | 0      | 0      | 0      | 0      | 0      | 0      |
| Gloeocapsa        | 1              | 20             | 0      | 0      | 0      | 0      | 0      | 0      | 0      | 0      | 0      | 0      | 0      | 0      | 0      | 0      | 0      | 0      | 0      | 0      |
| Gloeotheca        | 1              | 1              | 0      | 0      | 0      | 0      | 0      | 0      | 0      | 0      | 0      | 0      | 0      | 0      | 0      | 0      | 0      | 0      | 0      | 0      |
| Gluconacetobacter | 2              | 96             | 0      | 0      | 0      | 0      | 0      | 0      | 0      | 0      | 0      | 0      | 0      | 0      | 0      | 0      | 0      | 0      | 0      | 0      |
| Gluconobacter     | 2              | 76             | 0      | 0      | 0      | 0      | 0      | 0      | 0      | 0      | 0      | 0      | 0      | 0      | 0      | 0      | 0      | 0      | 0      | 0      |
| Gordonia          | 1              | 158            | 1      | 0      | 1      | 0      | 0      | 0      | 0      | 0      | 0      | 0      | 0      | 0      | 0      | 0      | 0      | 0      | 0      | 0      |
| Gordonibacter     | 1              | 32             | 0      | 0      | 0      | 0      | 0      | 0      | 0      | 0      | 0      | 0      | 0      | 0      | 0      | 0      | 0      | 0      | 1      | 0      |
| Gramella          | 2              | 104            | 0      | 0      | 0      | 0      | 0      | 0      | 0      | 0      | 0      | 0      | 0      | 0      | 0      | 0      | 0      | 0      | 0      | 0      |
| Granulibacter     | 2              | 90             | 0      | 0      | 0      | 0      | 0      | 0      | 0      | 0      | 0      | 0      | 0      | 0      | 0      | 0      | 0      | 0      | 0      | 0      |
| Granulicella      | 2              | 98             | 0      | 0      | 0      | 0      | 0      | 0      | 0      | 0      | 0      | 0      | 0      | 0      | 0      | 0      | 0      | 0      | 0      | 0      |
| Grimontia         | 1              | 9              | 0      | 0      | 0      | 0      | 0      | 0      | 0      | 0      | 0      | 0      | 0      | 0      | 0      | 0      | 0      | 0      | 0      | 0      |
| Haemophilus       | 2              | 117            | 0      | 0      | 0      | 0      | 0      | 0      | 0      | 0      | 0      | 0      | 0      | 0      | 0      | 0      | 0      | 0      | 0      | 0      |
| Hafnia            | 1              | 29             | 0      | 0      | 0      | 0      | 0      | 0      | 0      | 0      | 0      | 0      | 0      | 0      | 0      | 0      | 0      | 0      | 0      | 0      |
| Hahella           | 3              | 130            | 0      | 0      | 0      | 0      | 0      | 0      | 0      | 0      | 0      | 0      | 0      | 0      | 0      | 0      | 0      | 0      | 0      | 0      |
| Halalkalicoccus   | 1              | 18             | 0      | 0      | 0      | 0      | 0      | 0      | 0      | 0      | 0      | 0      | 0      | 0      | 0      | 0      | 0      | 0      | 0      | 0      |
| Halanaerobium     | 2              | 89             | 0      | 0      | 0      | 0      | 0      | 0      | 0      | 0      | 0      | 0      | 0      | 0      | 0      | 0      | 0      | 0      | 0      | 0      |
| Haliangium        | 2              | 108            | 0      | 0      | 0      | 0      | 0      | 0      | 0      | 0      | 0      | 0      | 0      | 0      | 0      | 0      | 0      | 0      | 0      | 0      |
| Haliscomenobacter | 2              | 107            | 0      | 0      | 0      | 0      | 0      | 0      | 0      | 0      | 0      | 0      | 0      | 0      | 0      | 0      | 0      | 0      | 0      | 0      |
| Haloarcula        | 1              | 22             | 0      | 0      | 0      | 0      | 0      | 0      | 0      | 0      | 0      | 0      | 0      | 0      | 0      | 0      | 0      | 0      | 0      | 0      |
| Halobacillus      | 1              | 19             | 0      | 0      | 0      | 0      | 0      | 0      | 0      | 0      | 0      | 0      | 0      | 0      | 0      | 0      | 0      | 0      | 0      | 0      |
| Halobacteriaceae  | 1              | 1              | 0      | 0      | 0      | 0      | 0      | 0      | 0      | 0      | 0      | 0      | 0      | 0      | 0      | 0      | 0      | 0      | 0      | 0      |
| Halobacterium     | 1              | 10             | 0      | 0      | 0      | 0      | 0      | 0      | 0      | 0      | 0      | 0      | 0      | 0      | 0      | 0      | 0      | 0      | 0      | 0      |
| Halobacteroides   | 1              | 14             | 0      | 0      | 0      | 0      | 0      | 0      | 0      | 0      | 0      | 0      | 0      | 0      | 0      | 0      | 0      | 0      | 0      | 0      |
| Haloferax         | 1              | 20             | 0      | 0      | 0      | 0      | 0      | 0      | 0      | 0      | 0      | 0      | 0      | 0      | 0      | 0      | 0      | 0      | 0      | 0      |
| Halogeometricum   | 1              | 12             | 0      | 0      | 0      | 0      | 0      | 0      | 0      | 0      | 0      | 0      | 0      | 0      | 0      | 0      | 0      | 0      | 0      | 0      |
| Halomicrobium     | 1              | 10             | 0      | 0      | 0      | 0      | 0      | 0      | 0      | 0      | 0      | 0      | 0      | 0      | 0      | 0      | 0      | 0      | 0      | 0      |
| Halomonas         | 1              | 149            | 0      | 0      | 0      | 0      | 0      | 0      | 0      | 0      | 0      | 0      | 0      | 0      | 0      | 0      | 0      | 0      | 0      | 0      |
| Halopiger         | 1              | 16             | 0      | 0      | 0      | 0      | 0      | 0      | 0      | 0      | 0      | 0      | 0      | 0      | 0      | 0      | 0      | 0      | 0      | 0      |
| Haloquadratum     | 1              | 19             | 0      | 0      | 0      | 0      | 0      | 0      | 0      | 0      | 0      | 0      | 0      | 0      | 0      | 0      | 0      | 0      | 0      | 0      |
| Halorhabdus       | 1              | 10             | 0      | 0      | 0      | 0      | 0      | 0      | 0      | 0      | 0      | 0      | 0      | 0      | 0      | 0      | 0      | 0      | 0      | 0      |
| Halorhodospira    | 2              | 71             | 0      | 0      | 0      | 0      | 0      | 0      | 0      | 0      | 0      | 0      | 0      | 0      | 0      | 0      | 0      | 0      | 1      | 0      |
| Halorubrum        | 1              | 16             | 0      | 0      | 0      | 0      | 0      | 0      | 0      | 0      | 0      | 0      | 0      | 0      | 0      | 0      | 0      | 0      | 0      | 0      |
| Haloterrigena     | 1              | 19             | 0      | 0      | 0      | 0      | 0      | 0      | 0      | 0      | 0      | 0      | 0      | 0      | 0      | 0      | 0      | 0      | 0      | 0      |
| Halothece         | 1              | 9              | 0      | 0      | 0      | 0      | 0      | 0      | 0      | 0      | 0      | 0      | 0      | 0      | 0      | 0      | 0      | 0      | 0      | 0      |
| Halothermothrix   | 2              | 50             | 0      | 0      | 0      | 0      | 0      | 0      | 0      | 0      | 0      | 0      | 0      | 0      | 0      | 0      | 0      | 0      | 0      | 0      |
| Halothiobacillus  | 2              | 65             | 0      | 0      | 0      | 0      | 0      | 0      | 0      | 0      | 0      | 0      | 0      | 0      | 0      | 0      | 0      | 0      | 0      | 0      |
| Halovivax         | 1              | 12             | 0      | 0      | 0      | 0      | 0      | 0      | 0      | 0      | 0      | 0      | 0      | 0      | 0      | 0      | 0      | 0      | 0      | 0      |
| Helicobacter      | 2              | 79             | 0      | 0      | 0      | 0      | 0      | 0      | 0      | 0      | 0      | 0      | 0      | 0      | 0      | 0      | 0      | 0      | 0      | 0      |
| Heliobacillus     | 1              | 4              | 0      | 0      | 0      | 0      | 0      | 0      | 0      | 0      | 0      | 0      | 0      | 0      | 0      | 0      | 0      | 0      | 0      | 0      |
| Heliobacterium    | 2              | 51             | 0      | 0      | 0      | 0      | 0      | 0      | 0      | 0      | 0      | 0      | 0      | 0      | 0      | 0      | 0      | 0      | 0      | 0      |
| Herbaspirillum    | 2              | 172            | 1      | 0      | 0      | 0      | 0      | 0      | 0      | 0      | 0      | 0      | 0      | 0      | 0      | 0      | 0      | 0      | 0      | 0      |
| Herminiimonas     | 3              | 89             | 0      | 0      | 0      | 0      | 0      | 0      | 0      | 0      | 0      | 0      | 0      | 0      | 0      | 0      | 0      | 0      | 0      | 0      |
| Herpetosiphon     | 3              | 90             | 0      | 0      | 0      | 0      | 0      | 0      | 0      | 0      | 0      | 0      | 0      | 0      | 0      | 0      | 0      | 0      | 0      | 0      |
| Hippea            | 2              | 44             | 0      | 0      | 0      | 0      | 0      | 0      | 0      | 0      | 0      | 0      | 0      | 0      | 0      | 0      | 0      | 0      | 0      | 0      |
| Hirschia          | 2              | 102            | 0      | 0      | 1      | 0      | 0      | 0      | 0      | 0      | 0      | 0      | 0      | 0      | 0      | 0      | 0      | 0      | 0      | 0      |
| Histophilus       | 2              | 72             | 0      | 0      | 0      | 0      | 0      | 0      | 0      | 0      | 0      | 0      | 0      | 0      | 0      | 0      | 0      | 0      | 0      | 0      |
| Hoeflea           | 1              | 16             | 0      | 0      | 0      | 0      | 0      | 0      | 0      | 0      | 0      | 0      | 0      | 0      | 0      | 0      | 0      | 0      | 0      | 0      |
| Hydrogenivirga    | 1              | 2              | 0      | 0      | 0      | 0      | 0      | 0      | 0      | 0      | 0      | 0      | 0      | 0      | 0      | 0      | 0      | 0      | 0      | 0      |
| Hydrogenobacter   | 2              | 55             | 0      | 0      | 0      | 0      | 0      | 0      | 0      | 0      | 0      | 0      | 0      | 0      | 0      | 0      | 0      | 0      | 0      | 0      |
| Hydrogenobaculum  | 2              | 44             | 0      | 0      | 0      | 0      | 0      | 0      | 0      | 0      | 0      | 0      | 0      | 0      | 0      | 0      | 0      | 0      | 0      | 0      |
| Hydrogenophaga    | 1              | 9              | 1      | 0      | 0      | 0      | 0      | 0      | 0      | 0      | 0      | 0      | 0      | 0      | 0      | 0      | 0      | 0      | 0      | 0      |
| Hylemonella       | 1              | 4              | 0      | 0      | 0      | 0      | 0      | 0      | 0      | 0      | 0      | 0      | 0      | 0      | 0      | 0      | 0      | 0      | 0      | 0      |

| Genus                 | Cluster Number | Protein Counts | K10218 | K10219 | K10220 | K10221 | K10222 | K10616 | K10617 | K10618 | K10619 | K10621 | K10622 | K10623 | K10676 | K10700 | K10701 | K10702 | K11180 | K11946 |
|-----------------------|----------------|----------------|--------|--------|--------|--------|--------|--------|--------|--------|--------|--------|--------|--------|--------|--------|--------|--------|--------|--------|
| Hyperthermus          | 1              | 6              | 0      | 0      | 0      | 0      | 0      | 0      | 0      | 0      | 0      | 0      | 0      | 0      | 0      | 0      | 0      | 0      | 0      | 0      |
| Hyphomicrobium        | 2              | 93             | 0      | 0      | 0      | 0      | 0      | 0      | 0      | 0      | 0      | 0      | 0      | 0      | 0      | 0      | 0      | 0      | 0      | 0      |
| Hyphomonas            | 3              | 105            | 0      | 0      | 0      | 0      | 0      | 0      | 0      | 0      | 0      | 0      | 0      | 0      | 0      | 0      | 0      | 0      | 0      | 0      |
| Ideonella             | 1              | 18             | 0      | 0      | 1      | 0      | 0      | 0      | 0      | 0      | 0      | 0      | 0      | 0      | 0      | 0      | 0      | 0      | 0      | 0      |
| Idiomarina            | 2              | 86             | 0      | 0      | 0      | 0      | 0      | 0      | 0      | 0      | 0      | 0      | 0      | 0      | 0      | 0      | 0      | 0      | 0      | 0      |
| Ignavibacterium       | 1              | 14             | 0      | 0      | 0      | 0      | 0      | 0      | 0      | 0      | 0      | 0      | 0      | 0      | 0      | 0      | 0      | 0      | 0      | 0      |
| Ignicoccus            | 1              | 5              | 0      | 0      | 0      | 0      | 0      | 0      | 0      | 0      | 0      | 0      | 0      | 0      | 0      | 0      | 0      | 0      | 0      | 0      |
| Ignisphaera           | 1              | 8              | 0      | 0      | 0      | 0      | 0      | 0      | 0      | 0      | 0      | 0      | 0      | 0      | 0      | 0      | 0      | 0      | 0      | 0      |
| Ilyobacter            | 2              | 85             | 0      | 0      | 0      | 0      | 0      | 0      | 0      | 0      | 0      | 0      | 0      | 0      | 0      | 0      | 0      | 0      | 0      | 0      |
| Intrasporangium       | 2              | 114            | 0      | 0      | 0      | 0      | 0      | 0      | 0      | 0      | 0      | 0      | 0      | 0      | 0      | 0      | 0      | 0      | 0      | 0      |
| Isoptericola          | 1              | 18             | 0      | 0      | 0      | 0      | 0      | 0      | 0      | 0      | 0      | 0      | 0      | 0      | 0      | 0      | 0      | 0      | 0      | 0      |
| Isosphaera            | 2              | 75             | 0      | 0      | 0      | 0      | 0      | 0      | 0      | 0      | 0      | 0      | 0      | 0      | 0      | 0      | 0      | 0      | 0      | 0      |
| Jannaschia            | 3              | 151            | 0      | 0      | 0      | 0      | 0      | 0      | 0      | 0      | 0      | 0      | 0      | 0      | 0      | 0      | 0      | 0      | 0      | 0      |
| Janthinobacterium     | 2              | 99             | 0      | 0      | 0      | 0      | 0      | 0      | 0      | 0      | 0      | 0      | 0      | 0      | 0      | 0      | 0      | 0      | 0      | 0      |
| Jonesia               | 2              | 56             | 0      | 0      | 0      | 0      | 0      | 0      | 0      | 0      | 0      | 0      | 0      | 0      | 0      | 0      | 0      | 0      | 0      | 0      |
| Joostella             | 1              | 3              | 0      | 0      | 0      | 0      | 0      | 0      | 0      | 0      | 0      | 0      | 0      | 0      | 0      | 0      | 0      | 0      | 0      | 0      |
| Kaistia               | 1              | 2              | 0      | 0      | 0      | 0      | 0      | 0      | 0      | 0      | 0      | 0      | 0      | 0      | 0      | 0      | 0      | 0      | 0      | 0      |
| Kangiella             | 2              | 84             | 0      | 0      | 0      | 0      | 0      | 0      | 0      | 0      | 0      | 0      | 0      | 0      | 0      | 0      | 0      | 0      | 0      | 0      |
| Ketogulonicigenium    | 2              | 102            | 1      | 0      | 0      | 0      | 0      | 0      | 0      | 0      | 0      | 0      | 0      | 0      | 0      | 0      | 0      | 0      | 0      | 0      |
| Kineococcus           | 1              | 24             | 0      | 0      | 0      | 0      | 0      | 0      | 0      | 0      | 0      | 0      | 0      | 0      | 0      | 0      | 0      | 0      | 0      | 0      |
| Kinetoplastibacterium | 1              | 2              | 0      | 0      | 0      | 0      | 0      | 0      | 0      | 0      | 0      | 0      | 0      | 0      | 0      | 0      | 0      | 0      | 0      | 0      |
| Kingella              | 1              | 4              | 0      | 0      | 0      | 0      | 0      | 0      | 0      | 0      | 0      | 0      | 0      | 0      | 0      | 0      | 0      | 0      | 0      | 0      |
| Kitasatospora         | 1              | 36             | 1      | 1      | 1      | 1      | 0      | 0      | 0      | 0      | 0      | 0      | 0      | 0      | 0      | 0      | 0      | 0      | 0      | 0      |
| Klebsiella            | 3              | 222            | 1      | 0      | 0      | 0      | 0      | 0      | 0      | 0      | 0      | 0      | 0      | 0      | 0      | 0      | 0      | 0      | 0      | 0      |
| Kluyvera              | 1              | 1              | 0      | 0      | 0      | 0      | 0      | 0      | 0      | 0      | 0      | 0      | 0      | 0      | 0      | 0      | 0      | 0      | 0      | 0      |
| Kocuria               | 2              | 87             | 0      | 0      | 0      | 0      | 0      | 0      | 0      | 0      | 0      | 0      | 0      | 0      | 0      | 0      | 0      | 0      | 0      | 0      |
| Kordia                | 1              | 5              | 0      | 0      | 0      | 0      | 0      | 0      | 0      | 0      | 0      | 0      | 0      | 0      | 0      | 0      | 0      | 0      | 0      | 0      |
| Kosmotoga             | 2              | 61             | 0      | 0      | 0      | 0      | 0      | 0      | 0      | 0      | 0      | 0      | 0      | 0      | 0      | 0      | 0      | 0      | 0      | 0      |
| Kribbella             | 2              | 99             | 0      | 0      | 0      | 0      | 0      | 0      | 0      | 0      | 0      | 0      | 0      | 0      | 0      | 0      | 0      | 0      | 0      | 0      |
| Krokinobacter         | 2              | 90             | 0      | 0      | 0      | 0      | 0      | 0      | 0      | 0      | 0      | 0      | 0      | 0      | 0      | 0      | 0      | 0      | 0      | 0      |
| Kyrpidia              | 2              | 113            | 0      | 0      | 0      | 0      | 0      | 0      | 0      | 0      | 0      | 0      | 0      | 0      | 0      | 0      | 0      | 0      | 0      | 0      |
| Kytococcus            | 2              | 70             | 0      | 0      | 0      | 0      | 0      | 0      | 0      | 0      | 0      | 0      | 0      | 0      | 0      | 0      | 0      | 0      | 0      | 0      |
| Labrenzia             | 1              | 4              | 0      | 0      | 0      | 0      | 0      | 0      | 0      | 0      | 0      | 0      | 0      | 0      | 0      | 0      | 0      | 0      | 0      | 0      |
| Lachnoanaerobaculum   | 1              | 1              | 0      | 0      | 0      | 0      | 0      | 0      | 0      | 0      | 0      | 0      | 0      | 0      | 0      | 0      | 0      | 0      | 0      | 0      |
| Lachnospiraceae       | 1              | 51             | 0      | 0      | 0      | 0      | 0      | 0      | 0      | 0      | 0      | 0      | 0      | 0      | 0      | 0      | 0      | 0      | 0      | 0      |
| Lacinutrix            | 1              | 20             | 0      | 0      | 0      | 0      | 0      | 0      | 0      | 0      | 0      | 0      | 0      | 0      | 0      | 0      | 0      | 0      | 0      | 0      |
| Lactobacillus         | 2              | 119            | 0      | 0      | 0      | 0      | 0      | 0      | 0      | 0      | 0      | 0      | 0      | 0      | 0      | 0      | 0      | 0      | 0      | 0      |
| Lactococcus           | 2              | 82             | 0      | 0      | 0      | 0      | 0      | 0      | 0      | 0      | 0      | 0      | 0      | 0      | 0      | 0      | 0      | 0      | 0      | 0      |
| Lamprocystis          | 1              | 2              | 0      | 0      | 0      | 0      | 0      | 0      | 0      | 0      | 0      | 0      | 0      | 0      | 0      | 0      | 0      | 0      | 1      | 0      |
| Laribacter            | 2              | 80             | 0      | 0      | 0      | 0      | 0      | 0      | 0      | 0      | 0      | 0      | 0      | 0      | 0      | 0      | 0      | 0      | 0      | 0      |
| Lawsonia              | 2              | 33             | 0      | 0      | 0      | 0      | 0      | 0      | 0      | 0      | 0      | 0      | 0      | 0      | 0      | 0      | 0      | 0      | 0      | 0      |
| Leadbetterella        | 2              | 79             | 0      | 0      | 0      | 0      | 0      | 0      | 0      | 0      | 0      | 0      | 0      | 0      | 0      | 0      | 0      | 0      | 0      | 0      |
| Leeuwenhoekiiella     | 1              | 2              | 0      | 0      | 0      | 0      | 0      | 0      | 0      | 0      | 0      | 0      | 0      | 0      | 0      | 0      | 0      | 0      | 0      | 0      |
| Legionella            | 2              | 117            | 0      | 0      | 0      | 0      | 0      | 0      | 0      | 0      | 0      | 0      | 0      | 0      | 0      | 0      | 0      | 0      | 0      | 0      |
| Leifsonia             | 2              | 48             | 0      | 0      | 0      | 0      | 0      | 0      | 0      | 0      | 0      | 0      | 0      | 0      | 0      | 0      | 0      | 0      | 0      | 0      |
| Leptolyngbya          | 1              | 10             | 0      | 0      | 0      | 0      | 0      | 0      | 0      | 0      | 0      | 0      | 0      | 0      | 0      | 0      | 0      | 0      | 0      | 0      |
| Leptospira            | 2              | 76             | 0      | 0      | 0      | 0      | 0      | 0      | 0      | 0      | 0      | 0      | 0      | 0      | 0      | 0      | 0      | 0      | 0      | 0      |
| Leptospirillum        | 1              | 10             | 0      | 0      | 0      | 0      | 0      | 0      | 0      | 0      | 0      | 0      | 0      | 0      | 0      | 0      | 0      | 0      | 0      | 0      |
| Leptothrix            | 3              | 186            | 1      | 1      | 1      | 1      | 0      | 0      | 0      | 0      | 0      | 0      | 0      | 0      | 0      | 0      | 0      | 0      | 0      | 0      |
| Leptotrichia          | 2              | 43             | 0      | 0      | 0      | 0      | 0      | 0      | 0      | 0      | 0      | 0      | 0      | 0      | 0      | 0      | 0      | 0      | 0      | 0      |
| Leucobacter           | 1              | 2              | 0      | 0      | 0      | 0      | 0      | 0      | 0      | 0      | 0      | 0      | 0      | 0      | 0      | 0      | 0      | 0      | 0      | 0      |
| Leuconostoc           | 2              | 64             | 0      | 0      | 0      | 0      | 0      | 0      | 0      | 0      | 0      | 0      | 0      | 0      | 0      | 0      | 0      | 0      | 0      | 0      |



| Genus                | Cluster Number | Protein Counts | K10218 | K10219 | K10220 | K10221 | K10222 | K10616 | K10617 | K10618 | K10619 | K10621 | K10622 | K10623 | K10676 | K10700 | K10701 | K10702 | K11180 | K11946 |
|----------------------|----------------|----------------|--------|--------|--------|--------|--------|--------|--------|--------|--------|--------|--------|--------|--------|--------|--------|--------|--------|--------|
| Liberibacter         | 1              | 4              | 0      | 0      | 0      | 0      | 0      | 0      | 0      | 0      | 0      | 0      | 0      | 0      | 0      | 0      | 0      | 0      | 0      | 0      |
| Limnohabitans        | 1              | 11             | 1      | 0      | 0      | 0      | 0      | 0      | 0      | 0      | 0      | 0      | 0      | 0      | 0      | 0      | 0      | 0      | 0      | 0      |
| Listeria             | 2              | 77             | 0      | 0      | 0      | 0      | 0      | 0      | 0      | 0      | 0      | 0      | 0      | 0      | 0      | 0      | 0      | 0      | 0      | 0      |
| Listeriaceae         | 1              | 6              | 0      | 0      | 0      | 0      | 0      | 0      | 0      | 0      | 0      | 0      | 0      | 0      | 0      | 0      | 0      | 0      | 0      | 0      |
| Listonella           | 1              | 38             | 0      | 0      | 0      | 0      | 0      | 0      | 0      | 0      | 0      | 0      | 0      | 0      | 0      | 0      | 0      | 0      | 0      | 0      |
| Loktanella           | 1              | 3              | 0      | 0      | 0      | 0      | 0      | 0      | 0      | 0      | 0      | 0      | 0      | 0      | 0      | 0      | 0      | 0      | 0      | 0      |
| Lysinibacillus       | 2              | 97             | 0      | 0      | 0      | 0      | 0      | 0      | 0      | 0      | 0      | 0      | 0      | 0      | 0      | 0      | 0      | 0      | 0      | 0      |
| Macrococcus          | 2              | 60             | 0      | 0      | 0      | 0      | 0      | 0      | 0      | 0      | 0      | 0      | 0      | 0      | 0      | 0      | 0      | 0      | 0      | 0      |
| Magnetococcus        | 2              | 64             | 0      | 0      | 0      | 0      | 0      | 0      | 0      | 0      | 0      | 0      | 0      | 0      | 0      | 0      | 0      | 0      | 1      | 0      |
| Magnetospirillum     | 2              | 113            | 1      | 1      | 1      | 1      | 0      | 0      | 0      | 0      | 0      | 0      | 0      | 0      | 0      | 0      | 0      | 0      | 1      | 0      |
| Mahella              | 2              | 58             | 0      | 0      | 0      | 0      | 0      | 0      | 0      | 0      | 0      | 0      | 0      | 0      | 0      | 0      | 0      | 0      | 0      | 0      |
| Mannheimia           | 2              | 85             | 0      | 0      | 0      | 0      | 0      | 0      | 0      | 0      | 0      | 0      | 0      | 0      | 0      | 0      | 0      | 0      | 0      | 0      |
| Maribacter           | 3              | 87             | 0      | 0      | 0      | 0      | 0      | 0      | 0      | 0      | 0      | 0      | 0      | 0      | 0      | 0      | 0      | 0      | 0      | 0      |
| Maricaulis           | 3              | 87             | 0      | 0      | 0      | 0      | 0      | 0      | 0      | 0      | 0      | 0      | 0      | 0      | 0      | 0      | 0      | 0      | 0      | 0      |
| Marichromatium       | 1              | 2              | 0      | 0      | 0      | 0      | 0      | 0      | 0      | 0      | 0      | 0      | 0      | 0      | 0      | 0      | 0      | 0      | 1      | 0      |
| Marinithermus        | 2              | 77             | 0      | 0      | 0      | 0      | 0      | 0      | 0      | 0      | 0      | 0      | 0      | 0      | 0      | 0      | 0      | 0      | 0      | 0      |
| Marinitoga           | 1              | 15             | 0      | 0      | 0      | 0      | 0      | 0      | 0      | 0      | 0      | 0      | 0      | 0      | 0      | 0      | 0      | 0      | 0      | 0      |
| Marinobacter         | 2              | 163            | 1      | 0      | 1      | 0      | 0      | 0      | 0      | 0      | 0      | 0      | 0      | 0      | 0      | 0      | 0      | 0      | 0      | 0      |
| Marinomonas          | 3              | 192            | 1      | 1      | 1      | 1      | 0      | 0      | 0      | 0      | 0      | 0      | 0      | 0      | 0      | 0      | 0      | 0      | 0      | 0      |
| Maritimibacter       | 1              | 7              | 0      | 0      | 0      | 0      | 0      | 0      | 0      | 0      | 0      | 0      | 0      | 0      | 0      | 0      | 0      | 0      | 0      | 0      |
| Marivirga            | 2              | 96             | 0      | 0      | 0      | 0      | 0      | 0      | 0      | 0      | 0      | 0      | 0      | 0      | 0      | 0      | 0      | 0      | 0      | 0      |
| Martella             | 1              | 3              | 0      | 0      | 0      | 0      | 0      | 0      | 0      | 0      | 0      | 0      | 0      | 0      | 0      | 0      | 0      | 0      | 0      | 0      |
| Marvinbryantia       | 1              | 1              | 0      | 0      | 0      | 0      | 0      | 0      | 0      | 0      | 0      | 0      | 0      | 0      | 0      | 0      | 0      | 0      | 0      | 0      |
| Massilia             | 1              | 4              | 0      | 0      | 0      | 0      | 0      | 0      | 0      | 0      | 0      | 0      | 0      | 0      | 0      | 0      | 0      | 0      | 0      | 0      |
| Mastigocladopsis     | 1              | 16             | 0      | 0      | 0      | 0      | 0      | 0      | 0      | 0      | 0      | 0      | 0      | 0      | 0      | 0      | 0      | 0      | 0      | 0      |
| Megamonas            | 1              | 47             | 0      | 0      | 0      | 0      | 0      | 0      | 0      | 0      | 0      | 0      | 0      | 0      | 0      | 0      | 0      | 0      | 0      | 0      |
| Megasphaera          | 1              | 14             | 0      | 0      | 0      | 0      | 0      | 0      | 0      | 0      | 0      | 0      | 0      | 0      | 0      | 0      | 0      | 0      | 0      | 0      |
| Meiothermus          | 2              | 110            | 1      | 0      | 0      | 0      | 0      | 0      | 0      | 0      | 0      | 0      | 0      | 0      | 0      | 0      | 0      | 0      | 0      | 0      |
| Melissococcus        | 2              | 46             | 0      | 0      | 0      | 0      | 0      | 0      | 0      | 0      | 0      | 0      | 0      | 0      | 0      | 0      | 0      | 0      | 0      | 0      |
| Mesoflavibacter      | 1              | 6              | 0      | 0      | 0      | 0      | 0      | 0      | 0      | 0      | 0      | 0      | 0      | 0      | 0      | 0      | 0      | 0      | 0      | 0      |
| Mesoplasma           | 1              | 23             | 0      | 0      | 0      | 0      | 0      | 0      | 0      | 0      | 0      | 0      | 0      | 0      | 0      | 0      | 0      | 0      | 0      | 0      |
| Mesorhizobium        | 2              | 201            | 0      | 0      | 0      | 0      | 0      | 0      | 0      | 0      | 0      | 0      | 0      | 0      | 1      | 0      | 0      | 0      | 0      | 0      |
| Mesotoga             | 1              | 14             | 0      | 0      | 0      | 0      | 0      | 0      | 0      | 0      | 0      | 0      | 0      | 0      | 0      | 0      | 0      | 0      | 0      | 0      |
| Metallosphaera       | 1              | 18             | 1      | 0      | 0      | 0      | 0      | 0      | 0      | 0      | 0      | 0      | 0      | 0      | 0      | 0      | 0      | 0      | 0      | 0      |
| Methanobacterium     | 1              | 7              | 0      | 0      | 0      | 0      | 0      | 0      | 0      | 0      | 0      | 0      | 0      | 0      | 0      | 0      | 0      | 0      | 0      | 0      |
| Methanobrevibacter   | 1              | 9              | 0      | 0      | 0      | 0      | 0      | 0      | 0      | 0      | 0      | 0      | 0      | 0      | 0      | 0      | 0      | 0      | 0      | 0      |
| Methanocaldococcus   | 1              | 6              | 0      | 0      | 0      | 0      | 0      | 0      | 0      | 0      | 0      | 0      | 0      | 0      | 0      | 0      | 0      | 0      | 0      | 0      |
| Methanocella         | 1              | 15             | 0      | 0      | 0      | 0      | 0      | 0      | 0      | 0      | 0      | 0      | 0      | 0      | 0      | 0      | 0      | 0      | 0      | 0      |
| Methanococcaceae     | 1              | 1              | 0      | 0      | 0      | 0      | 0      | 0      | 0      | 0      | 0      | 0      | 0      | 0      | 0      | 0      | 0      | 0      | 0      | 0      |
| Methanococcoides     | 1              | 5              | 0      | 0      | 0      | 0      | 0      | 0      | 0      | 0      | 0      | 0      | 0      | 0      | 0      | 0      | 0      | 0      | 0      | 0      |
| Methanococcus        | 1              | 9              | 0      | 0      | 0      | 0      | 0      | 0      | 0      | 0      | 0      | 0      | 0      | 0      | 0      | 0      | 0      | 0      | 0      | 0      |
| Methanocorpusculum   | 1              | 7              | 0      | 0      | 0      | 0      | 0      | 0      | 0      | 0      | 0      | 0      | 0      | 0      | 0      | 0      | 0      | 0      | 0      | 0      |
| Methanoculleus       | 1              | 8              | 0      | 0      | 0      | 0      | 0      | 0      | 0      | 0      | 0      | 0      | 0      | 0      | 0      | 0      | 0      | 0      | 0      | 0      |
| Methanohalobium      | 1              | 5              | 0      | 0      | 0      | 0      | 0      | 0      | 0      | 0      | 0      | 0      | 0      | 0      | 0      | 0      | 0      | 0      | 0      | 0      |
| Methanohalophilus    | 1              | 5              | 0      | 0      | 0      | 0      | 0      | 0      | 0      | 0      | 0      | 0      | 0      | 0      | 0      | 0      | 0      | 0      | 0      | 0      |
| Methanolobus         | 1              | 5              | 0      | 0      | 0      | 0      | 0      | 0      | 0      | 0      | 0      | 0      | 0      | 0      | 0      | 0      | 0      | 0      | 0      | 0      |
| Methanomethylovorans | 1              | 5              | 0      | 0      | 0      | 0      | 0      | 0      | 0      | 0      | 0      | 0      | 0      | 0      | 0      | 0      | 0      | 0      | 0      | 0      |
| Methanoplanus        | 1              | 7              | 0      | 0      | 0      | 0      | 0      | 0      | 0      | 0      | 0      | 0      | 0      | 0      | 0      | 0      | 0      | 0      | 0      | 0      |
| Methanopyrus         | 1              | 4              | 0      | 0      | 0      | 0      | 0      | 0      | 0      | 0      | 0      | 0      | 0      | 0      | 0      | 0      | 0      | 0      | 0      | 0      |
| Methanoregula        | 1              | 8              | 0      | 0      | 0      | 0      | 0      | 0      | 0      | 0      | 0      | 0      | 0      | 0      | 0      | 0      | 0      | 0      | 0      | 0      |
| Methanosaeta         | 1              | 9              | 0      | 0      | 0      | 0      | 0      | 0      | 0      | 0      | 0      | 0      | 0      | 0      | 0      | 0      | 0      | 0      | 0      | 0      |
| Methanosalsum        | 1              | 7              | 0      | 0      | 0      | 0      | 0      | 0      | 0      | 0      | 0      | 0      | 0      | 0      | 0      | 0      | 0      | 0      | 0      | 0      |

| Genus               | Cluster Number | Protein Counts | K10218 | K10219 | K10220 | K10221 | K10222 | K10616 | K10617 | K10618 | K10619 | K10621 | K10622 | K10623 | K10676 | K10700 | K10701 | K10702 | K11180 | K11946 |
|---------------------|----------------|----------------|--------|--------|--------|--------|--------|--------|--------|--------|--------|--------|--------|--------|--------|--------|--------|--------|--------|--------|
| Methanosarcina      | 1              | 18             | 0      | 0      | 0      | 0      | 0      | 0      | 0      | 0      | 0      | 0      | 0      | 0      | 0      | 0      | 0      | 0      | 0      | 0      |
| Methanosphaera      | 1              | 7              | 0      | 0      | 0      | 0      | 0      | 0      | 0      | 0      | 0      | 0      | 0      | 0      | 0      | 0      | 0      | 0      | 0      | 0      |
| Methanosphaerula    | 1              | 8              | 0      | 0      | 0      | 0      | 0      | 0      | 0      | 0      | 0      | 0      | 0      | 0      | 0      | 0      | 0      | 0      | 0      | 0      |
| Methanospirillum    | 1              | 6              | 0      | 0      | 0      | 0      | 0      | 0      | 0      | 0      | 0      | 0      | 0      | 0      | 0      | 0      | 0      | 0      | 0      | 0      |
| Methanothermobacter | 1              | 6              | 0      | 0      | 0      | 0      | 0      | 0      | 0      | 0      | 0      | 0      | 0      | 0      | 0      | 0      | 0      | 0      | 0      | 0      |
| Methanothermococcus | 1              | 5              | 0      | 0      | 0      | 0      | 0      | 0      | 0      | 0      | 0      | 0      | 0      | 0      | 0      | 0      | 0      | 0      | 0      | 0      |
| Methanothermus      | 1              | 5              | 0      | 0      | 0      | 0      | 0      | 0      | 0      | 0      | 0      | 0      | 0      | 0      | 0      | 0      | 0      | 0      | 0      | 0      |
| Methanotorris       | 1              | 5              | 0      | 0      | 0      | 0      | 0      | 0      | 0      | 0      | 0      | 0      | 0      | 0      | 0      | 0      | 0      | 0      | 0      | 0      |
| Methylacidiphilum   | 2              | 48             | 0      | 0      | 0      | 0      | 0      | 0      | 0      | 0      | 0      | 0      | 0      | 0      | 0      | 0      | 0      | 0      | 0      | 0      |
| Methylarcula        | 1              | 2              | 0      | 0      | 0      | 0      | 0      | 0      | 0      | 0      | 0      | 0      | 0      | 0      | 0      | 0      | 0      | 0      | 0      | 0      |
| Methylibium         | 1              | 38             | 0      | 0      | 0      | 0      | 0      | 0      | 0      | 0      | 0      | 0      | 0      | 0      | 0      | 0      | 0      | 0      | 0      | 0      |
| Methylobacillus     | 2              | 61             | 0      | 0      | 0      | 0      | 0      | 0      | 0      | 0      | 0      | 0      | 0      | 0      | 0      | 0      | 0      | 0      | 0      | 0      |
| Methylobacterium    | 3              | 236            | 0      | 0      | 1      | 0      | 0      | 0      | 0      | 0      | 0      | 0      | 0      | 0      | 0      | 0      | 0      | 0      | 0      | 0      |
| Methylocella        | 3              | 117            | 0      | 0      | 0      | 0      | 0      | 0      | 0      | 0      | 0      | 0      | 0      | 0      | 1      | 0      | 0      | 0      | 0      | 0      |
| Methylococcus       | 2              | 80             | 0      | 0      | 0      | 0      | 0      | 0      | 0      | 0      | 0      | 0      | 0      | 0      | 0      | 0      | 0      | 0      | 0      | 0      |
| Methylocystis       | 1              | 21             | 0      | 0      | 0      | 0      | 0      | 0      | 0      | 0      | 0      | 0      | 0      | 0      | 0      | 0      | 0      | 0      | 0      | 0      |
| Methyloferula       | 1              | 2              | 0      | 0      | 0      | 0      | 0      | 0      | 0      | 0      | 0      | 0      | 0      | 0      | 0      | 0      | 0      | 0      | 0      | 0      |
| Methylomicrobium    | 1              | 12             | 0      | 0      | 0      | 0      | 0      | 0      | 0      | 0      | 0      | 0      | 0      | 0      | 0      | 0      | 0      | 0      | 0      | 0      |
| Methylomonas        | 1              | 15             | 0      | 0      | 0      | 0      | 0      | 0      | 0      | 0      | 0      | 0      | 0      | 0      | 0      | 0      | 0      | 0      | 0      | 0      |
| Methylophaga        | 1              | 7              | 0      | 0      | 0      | 0      | 0      | 0      | 0      | 0      | 0      | 0      | 0      | 0      | 0      | 0      | 0      | 0      | 0      | 0      |
| Methylophilus       | 1              | 2              | 0      | 0      | 0      | 0      | 0      | 0      | 0      | 0      | 0      | 0      | 0      | 0      | 0      | 0      | 0      | 0      | 0      | 0      |
| Methylosinus        | 1              | 2              | 0      | 0      | 0      | 0      | 0      | 0      | 0      | 0      | 0      | 0      | 0      | 0      | 0      | 0      | 0      | 0      | 0      | 0      |
| Methylotenera       | 2              | 72             | 0      | 0      | 0      | 0      | 0      | 0      | 0      | 0      | 0      | 0      | 0      | 0      | 0      | 0      | 0      | 0      | 0      | 0      |
| Methyloversatilis   | 1              | 5              | 0      | 0      | 0      | 0      | 0      | 0      | 0      | 0      | 0      | 0      | 0      | 0      | 0      | 0      | 0      | 0      | 0      | 0      |
| Methylovorus        | 2              | 66             | 0      | 0      | 0      | 0      | 0      | 0      | 0      | 0      | 0      | 0      | 0      | 0      | 0      | 0      | 0      | 0      | 0      | 0      |
| Micavibrio          | 1              | 9              | 0      | 0      | 0      | 0      | 0      | 0      | 0      | 0      | 0      | 0      | 0      | 0      | 0      | 0      | 0      | 0      | 0      | 0      |
| Microbacterium      | 2              | 115            | 1      | 0      | 0      | 0      | 0      | 0      | 0      | 0      | 0      | 0      | 0      | 0      | 0      | 0      | 0      | 0      | 0      | 0      |
| Microchaete         | 1              | 23             | 0      | 0      | 0      | 0      | 0      | 0      | 0      | 0      | 0      | 0      | 0      | 0      | 0      | 0      | 0      | 0      | 0      | 0      |
| Micrococcus         | 2              | 72             | 0      | 0      | 0      | 0      | 0      | 0      | 0      | 0      | 0      | 0      | 0      | 0      | 0      | 0      | 0      | 0      | 0      | 0      |
| Microcoleus         | 1              | 17             | 0      | 0      | 0      | 0      | 0      | 0      | 0      | 0      | 0      | 0      | 0      | 0      | 0      | 0      | 0      | 0      | 0      | 0      |
| Microcystis         | 2              | 67             | 0      | 0      | 0      | 0      | 0      | 0      | 0      | 0      | 0      | 0      | 0      | 0      | 0      | 0      | 0      | 0      | 0      | 0      |
| Microlunatus        | 1              | 25             | 1      | 0      | 0      | 0      | 0      | 0      | 0      | 0      | 0      | 0      | 0      | 0      | 0      | 0      | 0      | 0      | 0      | 0      |
| Micromonospora      | 2              | 115            | 1      | 0      | 0      | 0      | 0      | 0      | 0      | 0      | 0      | 0      | 0      | 0      | 0      | 0      | 0      | 0      | 0      | 0      |
| Microvirga          | 1              | 6              | 0      | 0      | 0      | 0      | 0      | 0      | 0      | 0      | 0      | 0      | 0      | 0      | 0      | 0      | 0      | 0      | 0      | 0      |
| Mobiluncus          | 1              | 41             | 0      | 0      | 0      | 0      | 0      | 0      | 0      | 0      | 0      | 0      | 0      | 0      | 0      | 0      | 0      | 0      | 0      | 0      |
| Modestobacter       | 1              | 43             | 1      | 0      | 1      | 0      | 0      | 0      | 0      | 0      | 0      | 0      | 0      | 0      | 0      | 0      | 0      | 0      | 0      | 0      |
| Moorea              | 1              | 2              | 0      | 0      | 0      | 0      | 0      | 0      | 0      | 0      | 0      | 0      | 0      | 0      | 0      | 0      | 0      | 0      | 0      | 0      |
| Moorella            | 2              | 69             | 0      | 0      | 0      | 0      | 0      | 0      | 0      | 0      | 0      | 0      | 0      | 0      | 0      | 0      | 0      | 0      | 1      | 0      |
| Moraxella           | 2              | 66             | 0      | 0      | 0      | 0      | 0      | 0      | 0      | 0      | 0      | 0      | 0      | 0      | 0      | 0      | 0      | 0      | 0      | 0      |
| Morganella          | 1              | 29             | 0      | 0      | 0      | 0      | 0      | 0      | 0      | 0      | 0      | 0      | 0      | 0      | 0      | 0      | 0      | 0      | 0      | 0      |
| Moritella           | 1              | 2              | 0      | 0      | 0      | 0      | 0      | 0      | 0      | 0      | 0      | 0      | 0      | 0      | 0      | 0      | 0      | 0      | 0      | 0      |
| Muricauda           | 1              | 23             | 0      | 0      | 0      | 0      | 0      | 0      | 0      | 0      | 0      | 0      | 0      | 0      | 0      | 0      | 0      | 0      | 0      | 0      |
| Mycobacterium       | 3              | 306            | 1      | 0      | 1      | 0      | 0      | 0      | 0      | 0      | 0      | 1      | 0      | 0      | 1      | 0      | 0      | 0      | 0      | 1      |
| Mycoplasma          | 1              | 53             | 0      | 0      | 0      | 0      | 0      | 0      | 0      | 0      | 0      | 0      | 0      | 0      | 0      | 0      | 0      | 0      | 0      | 0      |
| Myxococcus          | 2              | 110            | 0      | 0      | 0      | 0      | 0      | 0      | 0      | 0      | 0      | 0      | 0      | 0      | 0      | 0      | 0      | 0      | 0      | 0      |
| Nakamurella         | 2              | 115            | 0      | 0      | 0      | 0      | 0      | 0      | 0      | 0      | 0      | 0      | 0      | 0      | 1      | 0      | 0      | 0      | 0      | 0      |
| napthalene          | 1              | 2              | 0      | 0      | 0      | 0      | 0      | 0      | 0      | 0      | 0      | 0      | 0      | 0      | 0      | 0      | 0      | 0      | 0      | 0      |
| Natranaerobius      | 2              | 55             | 0      | 0      | 0      | 0      | 0      | 0      | 0      | 0      | 0      | 0      | 0      | 0      | 0      | 0      | 0      | 0      | 0      | 0      |
| Natrialba           | 1              | 16             | 0      | 0      | 0      | 0      | 0      | 0      | 0      | 0      | 0      | 0      | 0      | 0      | 0      | 0      | 0      | 0      | 0      | 0      |
| Natrinema           | 1              | 16             | 0      | 0      | 0      | 0      | 0      | 0      | 0      | 0      | 0      | 0      | 0      | 0      | 0      | 0      | 0      | 0      | 0      | 0      |
| Natronobacterium    | 1              | 11             | 0      | 0      | 0      | 0      | 0      | 0      | 0      | 0      | 0      | 0      | 0      | 0      | 0      | 0      | 0      | 0      | 0      | 0      |
| Natronococcus       | 1              | 21             | 0      | 0      | 0      | 0      | 0      | 0      | 0      | 0      | 0      | 0      | 0      | 0      | 0      | 0      | 0      | 0      | 0      | 0      |

| Genus             | Cluster Number | Protein Counts | K10218 | K10219 | K10220 | K10221 | K10222 | K10616 | K10617 | K10618 | K10619 | K10621 | K10622 | K10623 | K10676 | K10700 | K10701 | K10702 | K11180 | K11946 |
|-------------------|----------------|----------------|--------|--------|--------|--------|--------|--------|--------|--------|--------|--------|--------|--------|--------|--------|--------|--------|--------|--------|
| Natronomonas      | 1              | 20             | 0      | 0      | 0      | 0      | 0      | 0      | 0      | 0      | 0      | 0      | 0      | 0      | 0      | 0      | 0      | 0      | 0      | 0      |
| Nautilia          | 2              | 48             | 0      | 0      | 0      | 0      | 0      | 0      | 0      | 0      | 0      | 0      | 0      | 0      | 0      | 0      | 0      | 0      | 0      | 0      |
| Neisseria         | 2              | 67             | 0      | 0      | 0      | 0      | 0      | 0      | 0      | 0      | 0      | 0      | 0      | 0      | 0      | 0      | 0      | 0      | 0      | 0      |
| Neisseriaceae     | 1              | 1              | 0      | 0      | 0      | 0      | 0      | 0      | 0      | 0      | 0      | 0      | 0      | 0      | 0      | 0      | 0      | 0      | 0      | 0      |
| Neorickettsia     | 1              | 31             | 0      | 0      | 0      | 0      | 0      | 0      | 0      | 0      | 0      | 0      | 0      | 0      | 0      | 0      | 0      | 0      | 0      | 0      |
| Neptuniibacter    | 1              | 2              | 0      | 0      | 0      | 0      | 0      | 0      | 0      | 0      | 0      | 0      | 0      | 0      | 0      | 0      | 0      | 0      | 0      | 0      |
| Niastella         | 1              | 21             | 0      | 0      | 0      | 0      | 0      | 0      | 0      | 0      | 0      | 0      | 0      | 0      | 0      | 0      | 0      | 0      | 0      | 0      |
| Nitratifractor    | 2              | 54             | 0      | 0      | 0      | 0      | 0      | 0      | 0      | 0      | 0      | 0      | 0      | 0      | 0      | 0      | 0      | 0      | 0      | 0      |
| Nitratireductor   | 1              | 19             | 0      | 0      | 0      | 0      | 0      | 0      | 0      | 0      | 0      | 0      | 0      | 0      | 0      | 0      | 0      | 0      | 0      | 0      |
| Nitratiruptor     | 2              | 40             | 0      | 0      | 0      | 0      | 0      | 0      | 0      | 0      | 0      | 0      | 0      | 0      | 0      | 0      | 0      | 0      | 0      | 0      |
| Nitrobacter       | 2              | 99             | 0      | 0      | 0      | 0      | 0      | 0      | 0      | 0      | 0      | 0      | 0      | 0      | 0      | 0      | 0      | 0      | 0      | 0      |
| Nitrococcus       | 1              | 2              | 0      | 0      | 0      | 0      | 0      | 0      | 0      | 0      | 0      | 0      | 0      | 0      | 0      | 0      | 0      | 0      | 0      | 0      |
| Nitrosococcus     | 2              | 94             | 0      | 0      | 0      | 0      | 0      | 0      | 0      | 0      | 0      | 0      | 0      | 0      | 0      | 0      | 0      | 0      | 0      | 0      |
| Nitrosomonas      | 2              | 72             | 0      | 0      | 0      | 0      | 0      | 0      | 0      | 0      | 0      | 0      | 0      | 0      | 0      | 0      | 0      | 0      | 0      | 0      |
| Nitrosopumilaceae | 1              | 7              | 0      | 0      | 0      | 0      | 0      | 0      | 0      | 0      | 0      | 0      | 0      | 0      | 0      | 0      | 0      | 0      | 0      | 0      |
| Nitrosopumilus    | 1              | 11             | 0      | 0      | 0      | 0      | 0      | 0      | 0      | 0      | 0      | 0      | 0      | 0      | 0      | 0      | 0      | 0      | 0      | 0      |
| Nitrospira        | 2              | 74             | 0      | 0      | 0      | 0      | 0      | 0      | 0      | 0      | 0      | 0      | 0      | 0      | 0      | 0      | 0      | 0      | 0      | 0      |
| Nocardia          | 2              | 185            | 0      | 0      | 0      | 0      | 0      | 0      | 0      | 0      | 0      | 0      | 0      | 0      | 0      | 0      | 0      | 0      | 0      | 0      |
| Nocardioidaceae   | 1              | 2              | 0      | 0      | 0      | 0      | 0      | 0      | 0      | 0      | 0      | 0      | 0      | 0      | 0      | 0      | 0      | 0      | 0      | 0      |
| Nocardioides      | 2              | 157            | 0      | 0      | 0      | 0      | 0      | 0      | 0      | 0      | 0      | 0      | 1      | 0      | 1      | 0      | 0      | 0      | 0      | 0      |
| Nocardiopsis      | 2              | 102            | 0      | 0      | 0      | 0      | 0      | 0      | 0      | 0      | 0      | 0      | 0      | 0      | 0      | 0      | 0      | 0      | 0      | 0      |
| Nodularia         | 1              | 22             | 0      | 0      | 0      | 0      | 0      | 0      | 0      | 0      | 0      | 0      | 0      | 0      | 0      | 0      | 0      | 0      | 0      | 0      |
| Nonlabens         | 1              | 19             | 0      | 0      | 0      | 0      | 0      | 0      | 0      | 0      | 0      | 0      | 0      | 0      | 0      | 0      | 0      | 0      | 0      | 0      |
| Nostoc            | 2              | 111            | 0      | 0      | 0      | 0      | 0      | 0      | 0      | 0      | 0      | 0      | 0      | 0      | 0      | 0      | 0      | 0      | 0      | 0      |
| Nostocaceae       | 1              | 2              | 0      | 0      | 0      | 0      | 0      | 0      | 0      | 0      | 0      | 0      | 0      | 0      | 0      | 0      | 0      | 0      | 0      | 0      |
| Novosphingobium   | 2              | 169            | 1      | 1      | 1      | 1      | 0      | 0      | 0      | 0      | 0      | 0      | 0      | 0      | 0      | 0      | 0      | 0      | 0      | 0      |
| Oceanibaculum     | 1              | 3              | 0      | 0      | 0      | 0      | 0      | 0      | 0      | 0      | 0      | 0      | 0      | 0      | 0      | 0      | 0      | 0      | 0      | 0      |
| Oceanibulbus      | 1              | 12             | 0      | 0      | 0      | 0      | 0      | 0      | 0      | 0      | 0      | 0      | 0      | 0      | 0      | 0      | 0      | 0      | 0      | 0      |
| Oceanicola        | 1              | 9              | 0      | 0      | 0      | 0      | 0      | 0      | 0      | 0      | 0      | 0      | 0      | 0      | 0      | 0      | 0      | 0      | 0      | 0      |
| Oceanimonas       | 1              | 33             | 0      | 0      | 0      | 0      | 0      | 0      | 0      | 0      | 0      | 0      | 0      | 0      | 0      | 0      | 0      | 0      | 0      | 0      |
| Oceaniovalibus    | 1              | 2              | 0      | 0      | 0      | 0      | 0      | 0      | 0      | 0      | 0      | 0      | 0      | 0      | 0      | 0      | 0      | 0      | 0      | 0      |
| Oceanithermus     | 2              | 72             | 0      | 0      | 0      | 0      | 0      | 0      | 0      | 0      | 0      | 0      | 0      | 0      | 0      | 0      | 0      | 0      | 0      | 0      |
| Oceanobacillus    | 2              | 91             | 0      | 0      | 0      | 0      | 0      | 0      | 0      | 0      | 0      | 0      | 0      | 0      | 0      | 0      | 0      | 0      | 0      | 0      |
| Oceanospirillum   | 1              | 2              | 0      | 0      | 0      | 0      | 0      | 0      | 0      | 0      | 0      | 0      | 0      | 0      | 0      | 0      | 0      | 0      | 0      | 0      |
| Ochrobactrum      | 2              | 133            | 0      | 0      | 0      | 0      | 0      | 0      | 0      | 0      | 0      | 0      | 0      | 0      | 0      | 0      | 0      | 0      | 0      | 0      |
| Octadecabacter    | 1              | 29             | 0      | 0      | 0      | 0      | 0      | 0      | 0      | 0      | 0      | 0      | 0      | 0      | 0      | 0      | 0      | 0      | 0      | 0      |
| Oenococcus        | 2              | 41             | 0      | 0      | 0      | 0      | 0      | 0      | 0      | 0      | 0      | 0      | 0      | 0      | 0      | 0      | 0      | 0      | 0      | 0      |
| Oleomonas         | 1              | 2              | 0      | 0      | 0      | 0      | 0      | 0      | 0      | 0      | 0      | 0      | 0      | 0      | 0      | 0      | 0      | 0      | 0      | 0      |
| Oligotropha       | 3              | 87             | 0      | 0      | 0      | 0      | 0      | 0      | 0      | 0      | 0      | 0      | 0      | 0      | 0      | 0      | 0      | 0      | 0      | 0      |
| Olsenella         | 2              | 40             | 0      | 0      | 0      | 0      | 0      | 0      | 0      | 0      | 0      | 0      | 0      | 0      | 0      | 0      | 0      | 0      | 0      | 0      |
| Opitutus          | 2              | 67             | 0      | 0      | 0      | 0      | 0      | 0      | 0      | 0      | 0      | 0      | 0      | 0      | 0      | 0      | 0      | 0      | 0      | 0      |
| Orientia          | 1              | 21             | 0      | 0      | 0      | 0      | 0      | 0      | 0      | 0      | 0      | 0      | 0      | 0      | 0      | 0      | 0      | 0      | 0      | 0      |
| Ornithobacterium  | 1              | 11             | 0      | 0      | 0      | 0      | 0      | 0      | 0      | 0      | 0      | 0      | 0      | 0      | 0      | 0      | 0      | 0      | 0      | 0      |
| Oscillatoria      | 1              | 16             | 0      | 0      | 0      | 0      | 0      | 0      | 0      | 0      | 0      | 0      | 0      | 0      | 0      | 0      | 0      | 0      | 0      | 0      |
| Oscillatoriales   | 1              | 2              | 0      | 0      | 0      | 0      | 0      | 0      | 0      | 0      | 0      | 0      | 0      | 0      | 0      | 0      | 0      | 0      | 0      | 0      |
| Oscillibacter     | 1              | 20             | 0      | 0      | 0      | 0      | 0      | 0      | 0      | 0      | 0      | 0      | 0      | 0      | 0      | 0      | 0      | 0      | 0      | 0      |
| Owenweeksia       | 1              | 15             | 0      | 0      | 0      | 0      | 0      | 0      | 0      | 0      | 0      | 0      | 0      | 0      | 0      | 0      | 0      | 0      | 0      | 0      |
| Oxalobacteraceae  | 1              | 4              | 0      | 0      | 0      | 0      | 0      | 0      | 0      | 0      | 0      | 0      | 0      | 0      | 0      | 0      | 0      | 0      | 0      | 0      |
| Paenibacillus     | 2              | 152            | 0      | 0      | 0      | 0      | 0      | 0      | 0      | 0      | 0      | 0      | 0      | 0      | 0      | 0      | 0      | 0      | 0      | 0      |
| Paludibacter      | 2              | 67             | 0      | 0      | 0      | 0      | 0      | 0      | 0      | 0      | 0      | 0      | 0      | 0      | 0      | 0      | 0      | 0      | 0      | 0      |
| Pandoraea         | 1              | 18             | 0      | 0      | 0      | 0      | 0      | 0      | 0      | 0      | 0      | 0      | 0      | 0      | 0      | 0      | 0      | 0      | 0      | 0      |
| Pannonibacter     | 1              | 3              | 0      | 0      | 0      | 0      | 0      | 0      | 0      | 0      | 0      | 0      | 0      | 0      | 0      | 0      | 0      | 0      | 0      | 0      |

| Genus              | Cluster Number | Protein Counts | K10218 | K10219 | K10220 | K10221 | K10222 | K10616 | K10617 | K10618 | K10619 | K10621 | K10622 | K10623 | K10676 | K10700 | K10701 | K10702 | K11180 | K11946 |
|--------------------|----------------|----------------|--------|--------|--------|--------|--------|--------|--------|--------|--------|--------|--------|--------|--------|--------|--------|--------|--------|--------|
| Pantholops         | 1              | 23             | 0      | 0      | 1      | 0      | 0      | 0      | 0      | 0      | 0      | 0      | 0      | 0      | 0      | 0      | 0      | 0      | 0      | 0      |
| Pantoea            | 2              | 181            | 1      | 0      | 0      | 0      | 0      | 0      | 0      | 0      | 0      | 0      | 0      | 0      | 0      | 0      | 0      | 0      | 0      | 0      |
| Parabacteroides    | 2              | 64             | 0      | 0      | 0      | 0      | 0      | 0      | 0      | 0      | 0      | 0      | 0      | 0      | 0      | 0      | 0      | 0      | 0      | 0      |
| Parachlamydia      | 1              | 11             | 0      | 0      | 0      | 0      | 0      | 0      | 0      | 0      | 0      | 0      | 0      | 0      | 0      | 0      | 0      | 0      | 0      | 0      |
| Paracoccus         | 2              | 169            | 0      | 0      | 1      | 0      | 0      | 0      | 0      | 0      | 0      | 0      | 0      | 0      | 0      | 0      | 0      | 0      | 0      | 0      |
| Parvibaculum       | 3              | 117            | 0      | 0      | 0      | 0      | 0      | 0      | 0      | 0      | 0      | 0      | 0      | 0      | 0      | 0      | 0      | 0      | 0      | 0      |
| Parvularcula       | 2              | 72             | 0      | 0      | 0      | 0      | 0      | 0      | 0      | 0      | 0      | 0      | 0      | 0      | 0      | 0      | 0      | 0      | 0      | 0      |
| Pasteurella        | 2              | 85             | 0      | 0      | 0      | 0      | 0      | 0      | 0      | 0      | 0      | 0      | 0      | 0      | 0      | 0      | 0      | 0      | 0      | 0      |
| Pasteurellaceae    | 1              | 2              | 0      | 0      | 0      | 0      | 0      | 0      | 0      | 0      | 0      | 0      | 0      | 0      | 0      | 0      | 0      | 0      | 0      | 0      |
| Pectobacterium     | 1              | 44             | 0      | 0      | 0      | 0      | 0      | 0      | 0      | 0      | 0      | 0      | 0      | 0      | 0      | 0      | 0      | 0      | 0      | 0      |
| Pediococcus        | 1              | 43             | 0      | 0      | 0      | 0      | 0      | 0      | 0      | 0      | 0      | 0      | 0      | 0      | 0      | 0      | 0      | 0      | 0      | 0      |
| Pedobacter         | 2              | 88             | 0      | 0      | 0      | 0      | 0      | 0      | 0      | 0      | 0      | 0      | 0      | 0      | 0      | 0      | 0      | 0      | 0      | 0      |
| Pelagibaca         | 1              | 10             | 0      | 0      | 0      | 0      | 0      | 0      | 0      | 0      | 0      | 0      | 0      | 0      | 0      | 0      | 0      | 0      | 0      | 0      |
| Pelagibacterium    | 1              | 39             | 1      | 0      | 0      | 1      | 0      | 0      | 0      | 0      | 0      | 0      | 0      | 0      | 1      | 0      | 0      | 0      | 0      | 0      |
| Pelobacter         | 2              | 85             | 0      | 0      | 0      | 0      | 0      | 0      | 0      | 0      | 0      | 0      | 0      | 0      | 0      | 0      | 0      | 0      | 0      | 0      |
| Pelodictyon        | 2              | 62             | 0      | 0      | 0      | 0      | 0      | 0      | 0      | 0      | 0      | 0      | 0      | 0      | 0      | 0      | 0      | 0      | 1      | 0      |
| Pelosinus          | 1              | 1              | 0      | 0      | 0      | 0      | 0      | 0      | 0      | 0      | 0      | 0      | 0      | 0      | 0      | 0      | 0      | 0      | 0      | 0      |
| Pelotomaculum      | 2              | 60             | 0      | 0      | 0      | 0      | 0      | 0      | 0      | 0      | 0      | 0      | 0      | 0      | 0      | 0      | 0      | 0      | 0      | 0      |
| Peptostreptococcus | 1              | 1              | 0      | 0      | 0      | 0      | 0      | 0      | 0      | 0      | 0      | 0      | 0      | 0      | 0      | 0      | 0      | 0      | 0      | 0      |
| Persephonella      | 2              | 55             | 0      | 0      | 0      | 0      | 0      | 0      | 0      | 0      | 0      | 0      | 0      | 0      | 0      | 0      | 0      | 0      | 0      | 0      |
| Petrotoga          | 2              | 72             | 0      | 0      | 0      | 0      | 0      | 0      | 0      | 0      | 0      | 0      | 0      | 0      | 0      | 0      | 0      | 0      | 0      | 0      |
| Phaeobacter        | 2              | 55             | 1      | 0      | 0      | 0      | 0      | 0      | 0      | 0      | 0      | 0      | 0      | 0      | 0      | 0      | 0      | 0      | 0      | 0      |
| Phenylobacterium   | 3              | 103            | 0      | 0      | 0      | 0      | 0      | 0      | 0      | 0      | 0      | 0      | 0      | 0      | 0      | 0      | 0      | 0      | 0      | 0      |
| Photobacterium     | 2              | 119            | 0      | 0      | 0      | 0      | 0      | 0      | 0      | 0      | 0      | 0      | 0      | 0      | 0      | 0      | 0      | 0      | 0      | 0      |
| Photorhabdus       | 2              | 149            | 0      | 0      | 0      | 0      | 0      | 0      | 0      | 0      | 0      | 0      | 0      | 0      | 0      | 0      | 0      | 0      | 0      | 0      |
| Phycisphaera       | 1              | 9              | 0      | 0      | 0      | 0      | 0      | 0      | 0      | 0      | 0      | 0      | 0      | 0      | 0      | 0      | 0      | 0      | 0      | 0      |
| Phyllobacterium    | 1              | 6              | 0      | 0      | 0      | 0      | 0      | 0      | 0      | 0      | 0      | 0      | 0      | 0      | 0      | 0      | 0      | 0      | 0      | 0      |
| Picrophilus        | 1              | 15             | 0      | 0      | 0      | 0      | 0      | 0      | 0      | 0      | 0      | 0      | 0      | 0      | 0      | 0      | 0      | 0      | 0      | 0      |
| Pirellula          | 2              | 85             | 0      | 0      | 0      | 0      | 0      | 0      | 0      | 0      | 0      | 0      | 0      | 0      | 0      | 0      | 0      | 0      | 0      | 0      |
| Planctomyces       | 2              | 93             | 0      | 0      | 0      | 0      | 0      | 0      | 0      | 0      | 0      | 0      | 0      | 0      | 0      | 0      | 0      | 0      | 0      | 0      |
| Plautia            | 1              | 17             | 0      | 0      | 0      | 0      | 0      | 0      | 0      | 0      | 0      | 0      | 0      | 0      | 0      | 0      | 0      | 0      | 0      | 0      |
| Plesiomonas        | 1              | 4              | 0      | 0      | 0      | 0      | 0      | 0      | 0      | 0      | 0      | 0      | 0      | 0      | 0      | 0      | 0      | 0      | 0      | 0      |
| Pleurocapsa        | 1              | 23             | 0      | 0      | 0      | 0      | 0      | 0      | 0      | 0      | 0      | 0      | 0      | 0      | 0      | 0      | 0      | 0      | 0      | 0      |
| Polaribacter       | 2              | 74             | 0      | 0      | 0      | 0      | 0      | 0      | 0      | 0      | 0      | 0      | 0      | 0      | 0      | 0      | 0      | 0      | 0      | 0      |
| Polaromonas        | 3              | 238            | 1      | 1      | 1      | 1      | 1      | 0      | 0      | 0      | 0      | 0      | 0      | 0      | 0      | 0      | 0      | 0      | 0      | 0      |
| Polymorphum        | 3              | 173            | 1      | 0      | 0      | 1      | 0      | 0      | 0      | 0      | 0      | 0      | 0      | 0      | 0      | 0      | 0      | 0      | 0      | 0      |
| Polynucleobacter   | 1              | 19             | 0      | 0      | 0      | 0      | 0      | 0      | 0      | 0      | 0      | 0      | 0      | 0      | 0      | 0      | 0      | 0      | 0      | 0      |
| Ponticaulis        | 1              | 1              | 0      | 0      | 0      | 0      | 0      | 0      | 0      | 0      | 0      | 0      | 0      | 0      | 0      | 0      | 0      | 0      | 0      | 0      |
| Porphyromonas      | 2              | 63             | 0      | 0      | 0      | 0      | 0      | 0      | 0      | 0      | 0      | 0      | 0      | 0      | 0      | 0      | 0      | 0      | 0      | 0      |
| Prevotella         | 1              | 65             | 0      | 0      | 0      | 0      | 0      | 0      | 0      | 0      | 0      | 0      | 0      | 0      | 0      | 0      | 0      | 0      | 0      | 0      |
| Prochlorococcus    | 2              | 68             | 0      | 0      | 0      | 0      | 0      | 0      | 0      | 0      | 0      | 0      | 0      | 0      | 0      | 0      | 0      | 0      | 0      | 0      |
| Propionibacterium  | 1              | 62             | 0      | 0      | 0      | 0      | 0      | 0      | 0      | 0      | 0      | 0      | 0      | 0      | 0      | 0      | 0      | 0      | 0      | 0      |
| Prosthecochloris   | 1              | 16             | 0      | 0      | 0      | 0      | 0      | 0      | 0      | 0      | 0      | 0      | 0      | 0      | 0      | 0      | 0      | 0      | 1      | 0      |
| Proteobacteria     | 1              | 19             | 0      | 0      | 0      | 0      | 0      | 0      | 0      | 0      | 0      | 0      | 0      | 0      | 0      | 0      | 0      | 0      | 0      | 0      |
| Proteus            | 2              | 113            | 0      | 0      | 0      | 0      | 0      | 0      | 0      | 0      | 0      | 0      | 0      | 0      | 0      | 0      | 0      | 0      | 0      | 0      |
| Providencia        | 1              | 38             | 0      | 0      | 0      | 0      | 0      | 0      | 0      | 0      | 0      | 0      | 0      | 0      | 0      | 0      | 0      | 0      | 0      | 0      |
| Pseudaminobacter   | 1              | 10             | 0      | 0      | 0      | 0      | 0      | 0      | 0      | 0      | 0      | 0      | 0      | 0      | 0      | 0      | 0      | 0      | 0      | 0      |
| Pseudanabaena      | 1              | 11             | 0      | 0      | 0      | 0      | 0      | 0      | 0      | 0      | 0      | 0      | 0      | 0      | 0      | 0      | 0      | 0      | 0      | 0      |
| Pseudoalteromonas  | 2              | 188            | 1      | 1      | 1      | 1      | 0      | 0      | 0      | 0      | 0      | 0      | 0      | 0      | 0      | 0      | 0      | 0      | 0      | 0      |
| Pseudochrobactrum  | 1              | 7              | 0      | 0      | 0      | 0      | 0      | 0      | 0      | 0      | 0      | 0      | 0      | 0      | 0      | 0      | 0      | 0      | 0      | 0      |
| Pseudogulbenkiania | 1              | 40             | 1      | 0      | 1      | 0      | 0      | 0      | 0      | 0      | 0      | 0      | 0      | 0      | 0      | 0      | 0      | 0      | 0      | 0      |
| pseudomallei       | 3              | 131            | 0      | 0      | 0      | 0      | 0      | 0      | 0      | 0      | 0      | 0      | 0      | 0      | 0      | 0      | 0      | 0      | 0      | 0      |

| Genus                   | Cluster Number | Protein Counts | K10218 | K10219 | K10220 | K10221 | K10222 | K10616 | K10617 | K10618 | K10619 | K10621 | K10622 | K10623 | K10676 | K10700 | K10701 | K10702 | K11180 | K11946 |
|-------------------------|----------------|----------------|--------|--------|--------|--------|--------|--------|--------|--------|--------|--------|--------|--------|--------|--------|--------|--------|--------|--------|
| Pseudomonas             | 3              | 381            | 1      | 1      | 1      | 1      | 1      | 1      | 1      | 1      | 1      | 1      | 1      | 1      | 1      | 0      | 0      | 1      | 0      | 0      |
| Pseudonocardia          | 3              | 180            | 1      | 0      | 0      | 0      | 0      | 0      | 0      | 0      | 0      | 0      | 0      | 0      | 0      | 0      | 0      | 0      | 0      | 0      |
| Pseudorhodobacter       | 1              | 4              | 0      | 0      | 0      | 0      | 0      | 0      | 0      | 0      | 0      | 0      | 0      | 0      | 0      | 0      | 0      | 0      | 0      | 0      |
| Pseudovibrio            | 1              | 33             | 0      | 0      | 0      | 0      | 0      | 0      | 0      | 0      | 0      | 0      | 0      | 0      | 0      | 0      | 0      | 0      | 0      | 0      |
| Pseudoxanthomonas       | 2              | 124            | 0      | 0      | 0      | 0      | 1      | 0      | 0      | 0      | 0      | 0      | 0      | 0      | 0      | 0      | 0      | 0      | 0      | 0      |
| Psychrobacter           | 2              | 124            | 0      | 0      | 0      | 0      | 0      | 0      | 0      | 0      | 0      | 0      | 0      | 0      | 0      | 0      | 0      | 0      | 0      | 0      |
| Psychroflexus           | 1              | 22             | 0      | 0      | 0      | 0      | 0      | 0      | 0      | 0      | 0      | 0      | 0      | 0      | 0      | 0      | 0      | 0      | 0      | 0      |
| Psychromonas            | 2              | 110            | 0      | 0      | 0      | 0      | 0      | 0      | 0      | 0      | 0      | 0      | 0      | 0      | 0      | 0      | 0      | 0      | 0      | 0      |
| Pusillimonas            | 3              | 111            | 0      | 0      | 0      | 0      | 0      | 0      | 0      | 0      | 0      | 0      | 0      | 0      | 0      | 0      | 0      | 0      | 0      | 0      |
| Pyrobaculum             | 1              | 15             | 0      | 0      | 0      | 0      | 0      | 0      | 0      | 0      | 0      | 0      | 0      | 0      | 0      | 0      | 0      | 0      | 1      | 0      |
| Pyrococcus              | 1              | 10             | 0      | 0      | 0      | 0      | 0      | 0      | 0      | 0      | 0      | 0      | 0      | 0      | 0      | 0      | 0      | 0      | 0      | 0      |
| Pyrolobus               | 1              | 4              | 0      | 0      | 0      | 0      | 0      | 0      | 0      | 0      | 0      | 0      | 0      | 0      | 0      | 0      | 0      | 0      | 0      | 0      |
| Rahnella                | 2              | 143            | 1      | 0      | 0      | 0      | 0      | 0      | 0      | 0      | 0      | 0      | 0      | 0      | 0      | 0      | 0      | 0      | 0      | 0      |
| Ralstonia               | 3              | 332            | 1      | 0      | 1      | 0      | 1      | 0      | 0      | 0      | 0      | 1      | 1      | 0      | 1      | 0      | 0      | 1      | 0      | 0      |
| Ramlibacter             | 1              | 35             | 1      | 1      | 1      | 1      | 0      | 0      | 0      | 0      | 0      | 0      | 0      | 0      | 0      | 0      | 0      | 0      | 0      | 0      |
| Raoultella              | 2              | 139            | 1      | 0      | 0      | 0      | 0      | 0      | 0      | 0      | 0      | 0      | 0      | 0      | 0      | 0      | 0      | 0      | 0      | 0      |
| Raphidiopsis            | 1              | 5              | 0      | 0      | 0      | 0      | 0      | 0      | 0      | 0      | 0      | 0      | 0      | 0      | 0      | 0      | 0      | 0      | 0      | 0      |
| Reinekea                | 1              | 2              | 0      | 0      | 0      | 0      | 0      | 0      | 0      | 0      | 0      | 0      | 0      | 0      | 0      | 0      | 0      | 0      | 0      | 0      |
| Renibacterium           | 2              | 67             | 0      | 0      | 0      | 0      | 0      | 0      | 0      | 0      | 0      | 0      | 0      | 0      | 0      | 0      | 0      | 0      | 0      | 0      |
| Rhizobiaceae            | 1              | 3              | 0      | 0      | 0      | 0      | 0      | 0      | 0      | 0      | 0      | 0      | 0      | 0      | 0      | 0      | 0      | 0      | 0      | 0      |
| Rhizobiales             | 1              | 6              | 0      | 0      | 0      | 0      | 0      | 0      | 0      | 0      | 0      | 0      | 0      | 0      | 0      | 0      | 0      | 0      | 0      | 0      |
| Rhizobium               | 3              | 257            | 1      | 0      | 1      | 1      | 0      | 0      | 0      | 0      | 0      | 1      | 1      | 0      | 1      | 0      | 0      | 0      | 0      | 0      |
| Rhizobium/Agrobacterium | 2              | 87             | 0      | 0      | 0      | 0      | 0      | 0      | 0      | 0      | 0      | 1      | 1      | 0      | 0      | 0      | 0      | 0      | 0      | 0      |
| Rhodanobacter           | 1              | 21             | 0      | 0      | 0      | 0      | 0      | 0      | 0      | 0      | 0      | 0      | 0      | 0      | 0      | 0      | 0      | 0      | 0      | 0      |
| Rhodobacter             | 3              | 175            | 1      | 0      | 0      | 0      | 0      | 0      | 0      | 0      | 0      | 0      | 0      | 0      | 0      | 0      | 0      | 0      | 0      | 0      |
| Rhodobacteraceae        | 1              | 21             | 0      | 0      | 0      | 0      | 0      | 0      | 0      | 0      | 0      | 0      | 0      | 0      | 0      | 0      | 0      | 0      | 0      | 0      |
| Rhodobacterales         | 1              | 34             | 0      | 0      | 0      | 0      | 0      | 0      | 0      | 0      | 0      | 0      | 0      | 0      | 0      | 0      | 0      | 0      | 0      | 0      |
| Rhodococcus             | 2              | 292            | 1      | 0      | 1      | 0      | 1      | 0      | 0      | 0      | 0      | 0      | 0      | 0      | 1      | 0      | 0      | 1      | 0      | 0      |
| Rhodocyclaceae          | 1              | 7              | 0      | 0      | 0      | 0      | 0      | 0      | 0      | 0      | 0      | 0      | 0      | 0      | 0      | 0      | 0      | 0      | 0      | 0      |
| Rhodoferax              | 3              | 144            | 1      | 1      | 1      | 1      | 0      | 0      | 0      | 0      | 0      | 0      | 0      | 0      | 0      | 0      | 0      | 0      | 0      | 0      |
| Rhodomicrobium          | 2              | 103            | 0      | 0      | 0      | 0      | 0      | 0      | 0      | 0      | 0      | 0      | 0      | 0      | 0      | 0      | 0      | 0      | 1      | 0      |
| Rhodopirellula          | 2              | 87             | 0      | 0      | 0      | 0      | 0      | 0      | 0      | 0      | 0      | 0      | 0      | 0      | 0      | 0      | 0      | 0      | 0      | 0      |
| Rhodopseudomonas        | 3              | 246            | 1      | 1      | 1      | 1      | 0      | 0      | 0      | 0      | 0      | 0      | 0      | 0      | 0      | 0      | 0      | 0      | 0      | 0      |
| Rhodospirillum          | 2              | 121            | 0      | 0      | 0      | 0      | 0      | 0      | 0      | 0      | 0      | 0      | 0      | 0      | 0      | 0      | 0      | 0      | 0      | 0      |
| Rhodothermus            | 2              | 76             | 0      | 0      | 0      | 0      | 0      | 0      | 0      | 0      | 0      | 0      | 0      | 0      | 0      | 0      | 0      | 0      | 0      | 0      |
| Rhodovulum              | 1              | 4              | 0      | 0      | 0      | 0      | 0      | 0      | 0      | 0      | 0      | 0      | 0      | 0      | 0      | 0      | 0      | 0      | 0      | 0      |
| Richelia                | 1              | 2              | 0      | 0      | 0      | 0      | 0      | 0      | 0      | 0      | 0      | 0      | 0      | 0      | 0      | 0      | 0      | 0      | 0      | 0      |
| Rickettsia              | 2              | 43             | 0      | 0      | 0      | 0      | 0      | 0      | 0      | 0      | 0      | 0      | 0      | 0      | 0      | 0      | 0      | 0      | 0      | 0      |
| Rickettsiaceae          | 1              | 5              | 0      | 0      | 0      | 0      | 0      | 0      | 0      | 0      | 0      | 0      | 0      | 0      | 0      | 0      | 0      | 0      | 0      | 0      |
| Riemerella              | 2              | 61             | 0      | 0      | 0      | 0      | 0      | 0      | 0      | 0      | 0      | 0      | 0      | 0      | 0      | 0      | 0      | 0      | 0      | 0      |
| Rivularia               | 1              | 18             | 0      | 0      | 0      | 0      | 0      | 0      | 0      | 0      | 0      | 0      | 0      | 0      | 0      | 0      | 0      | 0      | 0      | 0      |
| Robiginitalea           | 2              | 83             | 0      | 0      | 0      | 0      | 0      | 0      | 0      | 0      | 0      | 0      | 0      | 0      | 0      | 0      | 0      | 0      | 0      | 0      |
| Roseburia               | 2              | 58             | 0      | 0      | 0      | 0      | 0      | 0      | 0      | 0      | 0      | 0      | 0      | 0      | 0      | 0      | 0      | 0      | 0      | 0      |
| Roseibium               | 1              | 3              | 0      | 0      | 0      | 0      | 0      | 0      | 0      | 0      | 0      | 0      | 0      | 0      | 0      | 0      | 0      | 0      | 0      | 0      |
| Roseiflexus             | 3              | 100            | 0      | 0      | 0      | 0      | 0      | 0      | 0      | 0      | 0      | 0      | 0      | 0      | 0      | 0      | 0      | 0      | 0      | 0      |
| Roseobacter             | 2              | 149            | 0      | 0      | 0      | 0      | 0      | 0      | 0      | 0      | 0      | 0      | 0      | 0      | 0      | 0      | 0      | 0      | 0      | 0      |
| Roseomonas              | 1              | 2              | 0      | 0      | 0      | 0      | 0      | 0      | 0      | 0      | 0      | 0      | 0      | 0      | 0      | 0      | 0      | 0      | 0      | 0      |
| Roseovarius             | 1              | 15             | 0      | 0      | 0      | 0      | 0      | 0      | 0      | 0      | 0      | 0      | 0      | 0      | 0      | 0      | 0      | 0      | 0      | 0      |
| Rothia                  | 1              | 44             | 0      | 0      | 0      | 0      | 0      | 0      | 0      | 0      | 0      | 0      | 0      | 0      | 0      | 0      | 0      | 0      | 0      | 0      |
| Rubrivivax              | 1              | 24             | 0      | 0      | 0      | 0      | 0      | 0      | 0      | 0      | 0      | 0      | 0      | 0      | 0      | 0      | 0      | 0      | 0      | 0      |
| Rubrobacter             | 3              | 117            | 1      | 0      | 0      | 0      | 0      | 0      | 0      | 0      | 0      | 0      | 0      | 0      | 0      | 0      | 0      | 0      | 0      | 0      |
| Ruegeria                | 2              | 189            | 0      | 0      | 0      | 0      | 0      | 0      | 0      | 0      | 0      | 0      | 0      | 0      | 0      | 0      | 0      | 0      | 0      | 0      |

| Genus             | Cluster Number | Protein Counts | K10218 | K10219 | K10220 | K10221 | K10222 | K10616 | K10617 | K10618 | K10619 | K10621 | K10622 | K10623 | K10676 | K10700 | K10701 | K10702 | K11180 | K11946 |
|-------------------|----------------|----------------|--------|--------|--------|--------|--------|--------|--------|--------|--------|--------|--------|--------|--------|--------|--------|--------|--------|--------|
| Ruminococcaceae   | 1              | 2              | 0      | 0      | 0      | 0      | 0      | 0      | 0      | 0      | 0      | 0      | 0      | 0      | 0      | 0      | 0      | 0      | 0      | 0      |
| Ruminococcus      | 2              | 101            | 0      | 0      | 0      | 0      | 0      | 0      | 0      | 0      | 0      | 0      | 0      | 0      | 0      | 0      | 0      | 0      | 0      | 0      |
| Runella           | 1              | 26             | 1      | 0      | 0      | 0      | 0      | 0      | 0      | 0      | 0      | 0      | 0      | 0      | 0      | 0      | 0      | 0      | 0      | 0      |
| Saccharomonospora | 2              | 132            | 1      | 0      | 0      | 0      | 0      | 0      | 0      | 0      | 0      | 0      | 0      | 0      | 0      | 0      | 0      | 0      | 0      | 0      |
| Saccharophagus    | 2              | 81             | 0      | 0      | 0      | 0      | 0      | 0      | 0      | 0      | 0      | 0      | 0      | 0      | 0      | 0      | 0      | 0      | 0      | 0      |
| Saccharopolyspora | 3              | 194            | 0      | 0      | 0      | 0      | 0      | 0      | 0      | 0      | 0      | 0      | 0      | 0      | 0      | 0      | 0      | 0      | 0      | 0      |
| Saccharothrix     | 1              | 32             | 0      | 0      | 0      | 0      | 0      | 0      | 0      | 0      | 0      | 0      | 0      | 0      | 0      | 0      | 0      | 0      | 0      | 0      |
| Sagittula         | 1              | 10             | 0      | 0      | 0      | 0      | 0      | 0      | 0      | 0      | 0      | 0      | 0      | 0      | 0      | 0      | 0      | 0      | 0      | 0      |
| Salinibacter      | 2              | 77             | 0      | 0      | 0      | 0      | 0      | 0      | 0      | 0      | 0      | 0      | 0      | 0      | 0      | 0      | 0      | 0      | 0      | 0      |
| Salinimonas       | 1              | 1              | 0      | 0      | 0      | 0      | 0      | 0      | 0      | 0      | 0      | 0      | 0      | 0      | 0      | 0      | 0      | 0      | 0      | 0      |
| Salinispora       | 3              | 127            | 0      | 0      | 0      | 0      | 0      | 0      | 0      | 0      | 0      | 0      | 0      | 0      | 0      | 0      | 0      | 0      | 0      | 0      |
| Salinivibrio      | 1              | 2              | 0      | 0      | 0      | 0      | 0      | 0      | 0      | 0      | 0      | 0      | 0      | 0      | 0      | 0      | 0      | 0      | 0      | 0      |
| Salmonella        | 2              | 151            | 0      | 0      | 0      | 0      | 0      | 0      | 0      | 0      | 0      | 0      | 0      | 0      | 0      | 0      | 0      | 0      | 0      | 0      |
| Sanguibacter      | 2              | 73             | 0      | 0      | 0      | 0      | 0      | 0      | 0      | 0      | 0      | 0      | 0      | 0      | 0      | 0      | 0      | 0      | 0      | 0      |
| Saprospira        | 1              | 13             | 0      | 0      | 0      | 0      | 0      | 0      | 0      | 0      | 0      | 0      | 0      | 0      | 0      | 0      | 0      | 0      | 0      | 0      |
| Scardovia         | 1              | 1              | 0      | 0      | 0      | 0      | 0      | 0      | 0      | 0      | 0      | 0      | 0      | 0      | 0      | 0      | 0      | 0      | 0      | 0      |
| Scytonema         | 1              | 10             | 0      | 0      | 0      | 0      | 0      | 0      | 0      | 0      | 0      | 0      | 0      | 0      | 0      | 0      | 0      | 0      | 0      | 0      |
| Sebaldella        | 2              | 69             | 0      | 0      | 0      | 0      | 0      | 0      | 0      | 0      | 0      | 0      | 0      | 0      | 0      | 0      | 0      | 0      | 0      | 0      |
| Segniliparus      | 2              | 85             | 0      | 0      | 0      | 0      | 0      | 0      | 0      | 0      | 0      | 0      | 0      | 0      | 0      | 0      | 0      | 0      | 0      | 0      |
| Selenomonas       | 2              | 57             | 0      | 0      | 0      | 0      | 0      | 0      | 0      | 0      | 0      | 0      | 0      | 0      | 0      | 0      | 0      | 0      | 0      | 0      |
| Serinicoccus      | 1              | 1              | 0      | 0      | 0      | 0      | 0      | 0      | 0      | 0      | 0      | 0      | 0      | 0      | 0      | 0      | 0      | 0      | 0      | 0      |
| Serratia          | 2              | 186            | 1      | 0      | 0      | 0      | 0      | 0      | 0      | 0      | 0      | 0      | 0      | 0      | 0      | 0      | 0      | 0      | 0      | 0      |
| Shewanella        | 3              | 214            | 0      | 0      | 0      | 0      | 0      | 0      | 0      | 0      | 0      | 0      | 0      | 0      | 0      | 0      | 0      | 0      | 0      | 0      |
| Shigella          | 2              | 172            | 0      | 0      | 0      | 0      | 0      | 0      | 0      | 0      | 0      | 0      | 0      | 0      | 0      | 0      | 0      | 0      | 0      | 0      |
| Shinella          | 1              | 2              | 0      | 0      | 0      | 0      | 0      | 0      | 0      | 0      | 0      | 0      | 0      | 0      | 0      | 0      | 0      | 0      | 0      | 0      |
| Sideroxydans      | 2              | 81             | 0      | 0      | 0      | 0      | 0      | 0      | 0      | 0      | 0      | 0      | 0      | 0      | 0      | 0      | 0      | 0      | 1      | 0      |
| Silicibacter      | 2              | 105            | 0      | 0      | 0      | 0      | 0      | 0      | 0      | 0      | 0      | 0      | 0      | 0      | 0      | 0      | 0      | 0      | 0      | 0      |
| Simiduia          | 1              | 18             | 0      | 0      | 0      | 0      | 0      | 0      | 0      | 0      | 0      | 0      | 0      | 0      | 0      | 0      | 0      | 0      | 0      | 0      |
| Simkania          | 1              | 6              | 0      | 0      | 0      | 0      | 0      | 0      | 0      | 0      | 0      | 0      | 0      | 0      | 0      | 0      | 0      | 0      | 0      | 0      |
| Simonsiella       | 1              | 2              | 0      | 0      | 0      | 0      | 0      | 0      | 0      | 0      | 0      | 0      | 0      | 0      | 0      | 0      | 0      | 0      | 0      | 0      |
| Singulisphaera    | 1              | 18             | 0      | 0      | 0      | 0      | 0      | 0      | 0      | 0      | 0      | 0      | 0      | 0      | 0      | 0      | 0      | 0      | 0      | 0      |
| Sinorhizobium     | 3              | 207            | 1      | 0      | 1      | 0      | 0      | 0      | 0      | 0      | 0      | 0      | 0      | 0      | 0      | 0      | 0      | 0      | 0      | 0      |
| Slackia           | 2              | 46             | 0      | 0      | 0      | 0      | 0      | 0      | 0      | 0      | 0      | 0      | 0      | 0      | 0      | 0      | 0      | 0      | 0      | 0      |
| Smaragdicoccus    | 1              | 3              | 0      | 0      | 0      | 0      | 0      | 0      | 0      | 0      | 0      | 0      | 0      | 0      | 0      | 0      | 0      | 0      | 0      | 0      |
| Sodalis           | 2              | 71             | 0      | 0      | 0      | 0      | 0      | 0      | 0      | 0      | 0      | 0      | 0      | 0      | 0      | 0      | 0      | 0      | 0      | 0      |
| Solibacillus      | 1              | 23             | 0      | 0      | 0      | 0      | 0      | 0      | 0      | 0      | 0      | 0      | 0      | 0      | 0      | 0      | 0      | 0      | 0      | 0      |
| Solitaea          | 1              | 13             | 0      | 0      | 0      | 0      | 0      | 0      | 0      | 0      | 0      | 0      | 0      | 0      | 0      | 0      | 0      | 0      | 0      | 0      |
| Sorangium         | 3              | 115            | 0      | 0      | 0      | 0      | 0      | 0      | 0      | 0      | 0      | 0      | 0      | 0      | 0      | 0      | 0      | 0      | 0      | 0      |
| Sphaerobacter     | 2              | 100            | 1      | 0      | 0      | 0      | 0      | 0      | 0      | 0      | 0      | 0      | 0      | 0      | 0      | 0      | 0      | 0      | 0      | 0      |
| Sphaerochaeta     | 1              | 42             | 0      | 0      | 0      | 0      | 0      | 0      | 0      | 0      | 0      | 0      | 0      | 0      | 0      | 0      | 0      | 0      | 0      | 0      |
| Sphingobacterium  | 3              | 85             | 0      | 0      | 0      | 0      | 0      | 0      | 0      | 0      | 0      | 0      | 0      | 0      | 0      | 0      | 0      | 0      | 0      | 0      |
| Sphingobium       | 1              | 179            | 1      | 1      | 1      | 1      | 0      | 0      | 0      | 0      | 0      | 1      | 0      | 0      | 1      | 0      | 0      | 0      | 0      | 0      |
| Sphingomonadaceae | 1              | 15             | 0      | 0      | 0      | 0      | 0      | 0      | 0      | 0      | 0      | 0      | 0      | 0      | 0      | 0      | 0      | 0      | 0      | 0      |
| Sphingomonas      | 2              | 220            | 1      | 1      | 1      | 1      | 0      | 0      | 0      | 0      | 0      | 1      | 0      | 0      | 1      | 0      | 0      | 0      | 0      | 0      |
| Sphingopyxis      | 3              | 99             | 0      | 0      | 0      | 0      | 0      | 0      | 0      | 0      | 0      | 0      | 0      | 0      | 0      | 0      | 0      | 0      | 0      | 0      |
| Spirochaeta       | 2              | 103            | 0      | 0      | 0      | 0      | 0      | 0      | 0      | 0      | 0      | 0      | 0      | 0      | 0      | 0      | 0      | 0      | 0      | 0      |
| Spiroplasma       | 1              | 6              | 0      | 0      | 0      | 0      | 0      | 0      | 0      | 0      | 0      | 0      | 0      | 0      | 0      | 0      | 0      | 0      | 0      | 0      |
| Spirosoma         | 2              | 107            | 1      | 0      | 0      | 0      | 0      | 0      | 0      | 0      | 0      | 0      | 0      | 0      | 0      | 0      | 0      | 0      | 0      | 0      |
| Stackebrandtia    | 2              | 110            | 0      | 0      | 0      | 0      | 0      | 0      | 0      | 0      | 0      | 0      | 0      | 0      | 0      | 0      | 0      | 0      | 0      | 0      |
| Stanieria         | 1              | 17             | 0      | 0      | 0      | 0      | 0      | 0      | 0      | 0      | 0      | 0      | 0      | 0      | 0      | 0      | 0      | 0      | 0      | 0      |
| Staphylococcus    | 2              | 108            | 0      | 0      | 0      | 0      | 0      | 0      | 0      | 0      | 0      | 0      | 0      | 0      | 0      | 0      | 0      | 0      | 0      | 0      |
| Staphylothermus   | 1              | 12             | 0      | 0      | 0      | 0      | 0      | 0      | 0      | 0      | 0      | 0      | 0      | 0      | 0      | 0      | 0      | 0      | 0      | 0      |

| Genus                  | Cluster Number | Protein Counts | K10218 | K10219 | K10220 | K10221 | K10222 | K10616 | K10617 | K10618 | K10619 | K10621 | K10622 | K10623 | K10676 | K10700 | K10701 | K10702 | K11180 | K11946 |
|------------------------|----------------|----------------|--------|--------|--------|--------|--------|--------|--------|--------|--------|--------|--------|--------|--------|--------|--------|--------|--------|--------|
| Stappia                | 1              | 2              | 0      | 0      | 0      | 0      | 0      | 0      | 0      | 0      | 0      | 0      | 0      | 0      | 0      | 0      | 0      | 0      | 0      | 0      |
| Starkeya               | 3              | 134            | 0      | 0      | 0      | 0      | 0      | 0      | 0      | 0      | 0      | 0      | 0      | 0      | 0      | 0      | 0      | 0      | 0      | 0      |
| Stenotrophomonas       | 3              | 104            | 0      | 0      | 0      | 0      | 0      | 0      | 0      | 0      | 0      | 0      | 0      | 0      | 0      | 0      | 0      | 0      | 0      | 0      |
| Stigmatella            | 3              | 129            | 0      | 0      | 0      | 0      | 0      | 0      | 0      | 0      | 0      | 0      | 0      | 0      | 0      | 0      | 0      | 0      | 0      | 0      |
| Streptobacillus        | 1              | 38             | 0      | 0      | 0      | 0      | 0      | 0      | 0      | 0      | 0      | 0      | 0      | 0      | 0      | 0      | 0      | 0      | 0      | 0      |
| Streptococcus          | 2              | 121            | 0      | 0      | 0      | 0      | 0      | 0      | 0      | 0      | 0      | 0      | 0      | 0      | 0      | 0      | 0      | 0      | 0      | 0      |
| Streptomyces           | 2              | 253            | 1      | 0      | 1      | 1      | 0      | 0      | 0      | 0      | 0      | 1      | 1      | 0      | 1      | 0      | 0      | 0      | 0      | 0      |
| Streptosporangium      | 3              | 148            | 1      | 0      | 0      | 0      | 0      | 0      | 0      | 0      | 0      | 0      | 0      | 0      | 0      | 0      | 0      | 0      | 0      | 0      |
| Strigomonas            | 1              | 2              | 0      | 0      | 0      | 0      | 0      | 0      | 0      | 0      | 0      | 0      | 0      | 0      | 0      | 0      | 0      | 0      | 0      | 0      |
| Sulfitobacter          | 1              | 10             | 0      | 0      | 0      | 0      | 0      | 0      | 0      | 0      | 0      | 0      | 0      | 0      | 0      | 0      | 0      | 0      | 0      | 0      |
| Sulfobacillus          | 1              | 30             | 0      | 0      | 0      | 0      | 0      | 0      | 0      | 0      | 0      | 0      | 0      | 0      | 0      | 0      | 0      | 0      | 0      | 0      |
| Sulfolobus             | 1              | 23             | 0      | 0      | 0      | 0      | 0      | 0      | 0      | 0      | 0      | 0      | 0      | 0      | 0      | 0      | 0      | 0      | 0      | 0      |
| Sulfuricurvum          | 2              | 67             | 0      | 0      | 0      | 0      | 0      | 0      | 0      | 0      | 0      | 0      | 0      | 0      | 0      | 0      | 0      | 0      | 0      | 0      |
| Sulfurihydrogenibium   | 2              | 55             | 0      | 0      | 0      | 0      | 0      | 0      | 0      | 0      | 0      | 0      | 0      | 0      | 0      | 0      | 0      | 0      | 0      | 0      |
| Sulfurimonas           | 2              | 60             | 0      | 0      | 0      | 0      | 0      | 0      | 0      | 0      | 0      | 0      | 0      | 0      | 0      | 0      | 0      | 0      | 0      | 0      |
| Sulfurospirillum       | 1              | 48             | 0      | 0      | 0      | 0      | 0      | 0      | 0      | 0      | 0      | 0      | 0      | 0      | 0      | 0      | 0      | 0      | 0      | 0      |
| Sulfurovum             | 2              | 48             | 0      | 0      | 0      | 0      | 0      | 0      | 0      | 0      | 0      | 0      | 0      | 0      | 0      | 0      | 0      | 0      | 0      | 0      |
| Symbiobacterium        | 2              | 68             | 0      | 0      | 0      | 0      | 0      | 0      | 0      | 0      | 0      | 0      | 0      | 0      | 0      | 0      | 0      | 0      | 0      | 0      |
| Synechococcus          | 1              | 34             | 0      | 0      | 0      | 0      | 0      | 0      | 0      | 0      | 0      | 0      | 0      | 0      | 0      | 0      | 0      | 0      | 0      | 0      |
| Synechocystis          | 1              | 40             | 0      | 0      | 0      | 0      | 0      | 0      | 0      | 0      | 0      | 0      | 0      | 0      | 0      | 0      | 0      | 0      | 0      | 0      |
| Synergistetes          | 1              | 27             | 0      | 0      | 0      | 0      | 0      | 0      | 0      | 0      | 0      | 0      | 0      | 0      | 0      | 0      | 0      | 0      | 0      | 0      |
| Syntrophobacter        | 2              | 101            | 0      | 0      | 0      | 0      | 0      | 0      | 0      | 0      | 0      | 0      | 0      | 0      | 0      | 0      | 0      | 0      | 1      | 0      |
| Syntrophobotulus       | 2              | 71             | 0      | 0      | 0      | 0      | 0      | 0      | 0      | 0      | 0      | 0      | 0      | 0      | 0      | 0      | 0      | 0      | 0      | 0      |
| Syntrophomonas         | 2              | 58             | 0      | 0      | 0      | 0      | 0      | 0      | 0      | 0      | 0      | 0      | 0      | 0      | 0      | 0      | 0      | 0      | 0      | 0      |
| Syntrophothermus       | 2              | 60             | 0      | 0      | 0      | 0      | 0      | 0      | 0      | 0      | 0      | 0      | 0      | 0      | 0      | 0      | 0      | 0      | 0      | 0      |
| Syntrophus             | 2              | 66             | 0      | 0      | 0      | 0      | 0      | 0      | 0      | 0      | 0      | 0      | 0      | 0      | 0      | 0      | 0      | 0      | 0      | 0      |
| Tannerella             | 1              | 8              | 0      | 0      | 0      | 0      | 0      | 0      | 0      | 0      | 0      | 0      | 0      | 0      | 0      | 0      | 0      | 0      | 0      | 0      |
| Taylorella             | 1              | 43             | 0      | 0      | 0      | 0      | 0      | 0      | 0      | 0      | 0      | 0      | 0      | 0      | 0      | 0      | 0      | 0      | 0      | 0      |
| Tepidanaerobacter      | 2              | 55             | 0      | 0      | 0      | 0      | 0      | 0      | 0      | 0      | 0      | 0      | 0      | 0      | 0      | 0      | 0      | 0      | 0      | 0      |
| Teredinibacter         | 2              | 109            | 0      | 0      | 0      | 0      | 0      | 0      | 0      | 0      | 0      | 0      | 0      | 0      | 0      | 0      | 0      | 0      | 0      | 0      |
| Terrabacter            | 1              | 1              | 0      | 0      | 0      | 0      | 0      | 0      | 0      | 0      | 0      | 0      | 0      | 0      | 0      | 0      | 0      | 0      | 0      | 0      |
| Terriglobus            | 2              | 83             | 0      | 0      | 0      | 0      | 0      | 0      | 0      | 0      | 0      | 0      | 0      | 0      | 0      | 0      | 0      | 0      | 0      | 0      |
| Tetragenococcus        | 1              | 12             | 0      | 0      | 0      | 0      | 0      | 0      | 0      | 0      | 0      | 0      | 0      | 0      | 0      | 0      | 0      | 0      | 0      | 0      |
| Thalassiobium          | 1              | 11             | 0      | 0      | 0      | 0      | 0      | 0      | 0      | 0      | 0      | 0      | 0      | 0      | 0      | 0      | 0      | 0      | 0      | 0      |
| Thalassobacter         | 1              | 9              | 0      | 0      | 0      | 0      | 0      | 0      | 0      | 0      | 0      | 0      | 0      | 0      | 0      | 0      | 0      | 0      | 0      | 0      |
| Thalassolituus         | 1              | 12             | 0      | 0      | 0      | 0      | 0      | 0      | 0      | 0      | 0      | 0      | 0      | 0      | 0      | 0      | 0      | 0      | 0      | 0      |
| Thalassospira          | 1              | 2              | 0      | 0      | 0      | 0      | 0      | 0      | 0      | 0      | 0      | 0      | 0      | 0      | 0      | 0      | 0      | 0      | 0      | 0      |
| Thauera                | 1              | 111            | 1      | 1      | 1      | 1      | 0      | 0      | 0      | 0      | 0      | 0      | 0      | 0      | 0      | 0      | 0      | 0      | 0      | 0      |
| Thermacetogenium       | 1              | 7              | 1      | 0      | 0      | 0      | 0      | 0      | 0      | 0      | 0      | 0      | 0      | 0      | 0      | 0      | 0      | 0      | 0      | 0      |
| Thermaerobacter        | 2              | 79             | 0      | 0      | 0      | 0      | 0      | 0      | 0      | 0      | 0      | 0      | 0      | 0      | 0      | 0      | 0      | 0      | 0      | 0      |
| Thermanaerovibrio      | 2              | 58             | 0      | 0      | 0      | 0      | 0      | 0      | 0      | 0      | 0      | 0      | 0      | 0      | 0      | 0      | 0      | 0      | 0      | 0      |
| Thermincola            | 2              | 62             | 0      | 0      | 0      | 0      | 0      | 0      | 0      | 0      | 0      | 0      | 0      | 0      | 0      | 0      | 0      | 0      | 0      | 0      |
| Thermoanaerobacter     | 2              | 76             | 0      | 0      | 0      | 0      | 0      | 0      | 0      | 0      | 0      | 0      | 0      | 0      | 0      | 0      | 0      | 0      | 0      | 0      |
| Thermoanaerobacterium  | 2              | 64             | 0      | 0      | 0      | 0      | 0      | 0      | 0      | 0      | 0      | 0      | 0      | 0      | 0      | 0      | 0      | 0      | 0      | 0      |
| Thermobacillus         | 1              | 11             | 0      | 0      | 0      | 0      | 0      | 0      | 0      | 0      | 0      | 0      | 0      | 0      | 0      | 0      | 0      | 0      | 0      | 0      |
| Thermobaculum          | 2              | 62             | 0      | 0      | 0      | 0      | 0      | 0      | 0      | 0      | 0      | 0      | 0      | 0      | 0      | 0      | 0      | 0      | 0      | 0      |
| Thermobifida           | 2              | 72             | 0      | 0      | 0      | 0      | 0      | 0      | 0      | 0      | 0      | 0      | 0      | 0      | 0      | 0      | 0      | 0      | 0      | 0      |
| Thermobispora          | 2              | 109            | 0      | 0      | 0      | 0      | 0      | 0      | 0      | 0      | 0      | 0      | 0      | 0      | 0      | 0      | 0      | 0      | 0      | 0      |
| Thermococcus           | 1              | 13             | 0      | 0      | 0      | 0      | 0      | 0      | 0      | 0      | 0      | 0      | 0      | 0      | 0      | 0      | 0      | 0      | 0      | 0      |
| Thermocrinis           | 2              | 60             | 0      | 0      | 0      | 0      | 0      | 0      | 0      | 0      | 0      | 0      | 0      | 0      | 0      | 0      | 0      | 0      | 0      | 0      |
| Thermodesulfator       | 1              | 10             | 0      | 0      | 0      | 0      | 0      | 0      | 0      | 0      | 0      | 0      | 0      | 0      | 0      | 0      | 0      | 0      | 1      | 0      |
| Thermodesulfobacterium | 1              | 9              | 0      | 0      | 0      | 0      | 0      | 0      | 0      | 0      | 0      | 0      | 0      | 0      | 0      | 0      | 0      | 0      | 1      | 0      |

| Genus                       | Cluster Number | Protein Counts | K10218 | K10219 | K10220 | K10221 | K10222 | K10616 | K10617 | K10618 | K10619 | K10621 | K10622 | K10623 | K10676 | K10700 | K10701 | K10702 | K11180 | K11946 |
|-----------------------------|----------------|----------------|--------|--------|--------|--------|--------|--------|--------|--------|--------|--------|--------|--------|--------|--------|--------|--------|--------|--------|
| <b>Thermodesulfobium</b>    | 1              | 13             | 0      | 0      | 0      | 0      | 0      | 0      | 0      | 0      | 0      | 0      | 0      | 0      | 0      | 0      | 0      | 0      | 1      | 0      |
| <b>Thermodesulfobivrio</b>  | 2              | 60             | 0      | 0      | 0      | 0      | 0      | 0      | 0      | 0      | 0      | 0      | 0      | 0      | 0      | 0      | 0      | 0      | 1      | 0      |
| <b>Thermofilum</b>          | 1              | 9              | 0      | 0      | 0      | 0      | 0      | 0      | 0      | 0      | 0      | 0      | 0      | 0      | 0      | 0      | 0      | 0      | 0      | 0      |
| <b>Thermogladius</b>        | 1              | 7              | 0      | 0      | 0      | 0      | 0      | 0      | 0      | 0      | 0      | 0      | 0      | 0      | 0      | 0      | 0      | 0      | 0      | 0      |
| <b>Thermomicrobium</b>      | 2              | 92             | 1      | 0      | 0      | 0      | 0      | 0      | 0      | 0      | 0      | 0      | 0      | 0      | 0      | 0      | 0      | 0      | 0      | 0      |
| <b>Thermomonospora</b>      | 2              | 125            | 0      | 0      | 0      | 0      | 0      | 0      | 0      | 0      | 0      | 0      | 0      | 0      | 0      | 0      | 0      | 1      | 0      | 0      |
| <b>Thermoplasma</b>         | 1              | 11             | 0      | 0      | 0      | 0      | 0      | 0      | 0      | 0      | 0      | 0      | 0      | 0      | 0      | 0      | 0      | 0      | 0      | 0      |
| <b>Thermoplasmatales</b>    | 1              | 6              | 0      | 0      | 0      | 0      | 0      | 0      | 0      | 0      | 0      | 0      | 0      | 0      | 0      | 0      | 0      | 0      | 0      | 0      |
| <b>Thermoproteus</b>        | 1              | 12             | 0      | 0      | 0      | 0      | 0      | 0      | 0      | 0      | 0      | 0      | 0      | 0      | 0      | 0      | 0      | 0      | 1      | 0      |
| <b>Thermosediminibacter</b> | 2              | 64             | 0      | 0      | 0      | 0      | 0      | 0      | 0      | 0      | 0      | 0      | 0      | 0      | 0      | 0      | 0      | 0      | 0      | 0      |
| <b>Thermosipho</b>          | 2              | 70             | 0      | 0      | 0      | 0      | 0      | 0      | 0      | 0      | 0      | 0      | 0      | 0      | 0      | 0      | 0      | 0      | 0      | 0      |
| <b>Thermosphaera</b>        | 1              | 10             | 0      | 0      | 0      | 0      | 0      | 0      | 0      | 0      | 0      | 0      | 0      | 0      | 0      | 0      | 0      | 0      | 0      | 0      |
| <b>Thermosynechococcus</b>  | 1              | 6              | 0      | 0      | 0      | 0      | 0      | 0      | 0      | 0      | 0      | 0      | 0      | 0      | 0      | 0      | 0      | 0      | 0      | 0      |
| <b>Thermotoga</b>           | 2              | 80             | 0      | 0      | 0      | 0      | 0      | 0      | 0      | 0      | 0      | 0      | 0      | 0      | 0      | 0      | 0      | 0      | 0      | 0      |
| <b>Thermovibrio</b>         | 2              | 58             | 0      | 0      | 0      | 0      | 0      | 0      | 0      | 0      | 0      | 0      | 0      | 0      | 0      | 0      | 0      | 0      | 0      | 0      |
| <b>Thermovirga</b>          | 1              | 9              | 0      | 0      | 0      | 0      | 0      | 0      | 0      | 0      | 0      | 0      | 0      | 0      | 0      | 0      | 0      | 0      | 0      | 0      |
| <b>Thermus</b>              | 2              | 107            | 1      | 0      | 0      | 0      | 0      | 0      | 0      | 0      | 0      | 0      | 0      | 0      | 0      | 0      | 0      | 0      | 0      | 0      |
| <b>Thioalkalimicrobium</b>  | 1              | 4              | 0      | 0      | 0      | 0      | 0      | 0      | 0      | 0      | 0      | 0      | 0      | 0      | 0      | 0      | 0      | 0      | 0      | 0      |
| <b>Thioalkalivibrio</b>     | 2              | 91             | 0      | 0      | 0      | 0      | 0      | 0      | 0      | 0      | 0      | 0      | 0      | 0      | 0      | 0      | 0      | 0      | 1      | 0      |
| <b>Thiobaca</b>             | 1              | 2              | 0      | 0      | 0      | 0      | 0      | 0      | 0      | 0      | 0      | 0      | 0      | 0      | 0      | 0      | 0      | 0      | 1      | 0      |
| <b>Thiobacillus</b>         | 2              | 67             | 0      | 0      | 0      | 0      | 0      | 0      | 0      | 0      | 0      | 0      | 0      | 0      | 0      | 0      | 0      | 0      | 1      | 0      |
| <b>Thiocapsa</b>            | 1              | 2              | 0      | 0      | 0      | 0      | 0      | 0      | 0      | 0      | 0      | 0      | 0      | 0      | 0      | 0      | 0      | 0      | 1      | 0      |
| <b>Thiocystis</b>           | 1              | 11             | 0      | 0      | 0      | 0      | 0      | 0      | 0      | 0      | 0      | 0      | 0      | 0      | 0      | 0      | 0      | 0      | 1      | 0      |
| <b>Thioflavococcus</b>      | 1              | 13             | 0      | 0      | 0      | 0      | 0      | 0      | 0      | 0      | 0      | 0      | 0      | 0      | 0      | 0      | 0      | 0      | 1      | 0      |
| <b>Thiomicrospira</b>       | 2              | 50             | 0      | 0      | 0      | 0      | 0      | 0      | 0      | 0      | 0      | 0      | 0      | 0      | 0      | 0      | 0      | 0      | 0      | 0      |
| <b>Thiomonas</b>            | 2              | 85             | 0      | 0      | 0      | 0      | 0      | 0      | 0      | 0      | 0      | 0      | 0      | 0      | 0      | 0      | 0      | 0      | 0      | 0      |
| <b>Thiorhodococcus</b>      | 1              | 2              | 0      | 0      | 0      | 0      | 0      | 0      | 0      | 0      | 0      | 0      | 0      | 0      | 0      | 0      | 0      | 0      | 1      | 0      |
| <b>Thiothrix</b>            | 1              | 2              | 0      | 0      | 0      | 0      | 0      | 0      | 0      | 0      | 0      | 0      | 0      | 0      | 0      | 0      | 0      | 0      | 0      | 0      |
| <b>Tistrella</b>            | 1              | 42             | 0      | 0      | 0      | 0      | 0      | 0      | 0      | 0      | 0      | 1      | 1      | 0      | 0      | 0      | 0      | 0      | 0      | 0      |
| <b>Tolumonas</b>            | 2              | 100            | 0      | 0      | 0      | 0      | 0      | 0      | 0      | 0      | 0      | 0      | 0      | 0      | 0      | 0      | 0      | 0      | 0      | 0      |
| <b>Transposon</b>           | 1              | 2              | 0      | 0      | 0      | 0      | 0      | 0      | 0      | 0      | 0      | 0      | 0      | 0      | 0      | 0      | 0      | 0      | 0      | 0      |
| <b>Treponema</b>            | 1              | 63             | 0      | 0      | 0      | 0      | 0      | 0      | 0      | 0      | 0      | 0      | 0      | 0      | 0      | 0      | 0      | 0      | 0      | 0      |
| <b>Trichodesmium</b>        | 2              | 71             | 0      | 0      | 0      | 0      | 0      | 0      | 0      | 0      | 0      | 0      | 0      | 0      | 0      | 0      | 0      | 0      | 0      | 0      |
| <b>Trichormus</b>           | 1              | 12             | 0      | 0      | 0      | 0      | 0      | 0      | 0      | 0      | 0      | 0      | 0      | 0      | 0      | 0      | 0      | 0      | 0      | 0      |
| <b>Tropheryma</b>           | 2              | 22             | 0      | 0      | 0      | 0      | 0      | 0      | 0      | 0      | 0      | 0      | 0      | 0      | 0      | 0      | 0      | 0      | 0      | 0      |
| <b>Truepera</b>             | 2              | 104            | 0      | 0      | 0      | 0      | 0      | 0      | 0      | 0      | 0      | 0      | 0      | 0      | 0      | 0      | 0      | 0      | 0      | 0      |
| <b>Tsukamurella</b>         | 2              | 123            | 0      | 0      | 0      | 0      | 0      | 0      | 0      | 0      | 0      | 0      | 0      | 0      | 0      | 0      | 0      | 0      | 0      | 0      |
| <b>Turneriella</b>          | 1              | 16             | 0      | 0      | 0      | 0      | 0      | 0      | 0      | 0      | 0      | 0      | 0      | 0      | 0      | 0      | 0      | 0      | 0      | 0      |
| <b>Uliginosibacterium</b>   | 1              | 2              | 0      | 0      | 0      | 0      | 0      | 0      | 0      | 0      | 0      | 0      | 0      | 0      | 0      | 0      | 0      | 0      | 0      | 0      |
| <b>Ureaplasma</b>           | 1              | 24             | 0      | 0      | 0      | 0      | 0      | 0      | 0      | 0      | 0      | 0      | 0      | 0      | 0      | 0      | 0      | 0      | 0      | 0      |
| <b>Ureibacillus</b>         | 1              | 2              | 0      | 0      | 0      | 0      | 0      | 0      | 0      | 0      | 0      | 0      | 0      | 0      | 0      | 0      | 0      | 0      | 0      | 0      |
| <b>Variovorax</b>           | 3              | 187            | 1      | 0      | 1      | 1      | 0      | 0      | 0      | 0      | 0      | 0      | 0      | 0      | 0      | 0      | 0      | 0      | 0      | 0      |
| <b>Veillonella</b>          | 1              | 54             | 0      | 0      | 0      | 0      | 0      | 0      | 0      | 0      | 0      | 0      | 0      | 0      | 0      | 0      | 0      | 0      | 0      | 0      |
| <b>Verminephrobacter</b>    | 3              | 188            | 0      | 1      | 1      | 1      | 0      | 0      | 0      | 0      | 0      | 0      | 0      | 0      | 0      | 0      | 0      | 0      | 0      | 0      |
| <b>Verrucosispora</b>       | 3              | 126            | 0      | 0      | 0      | 0      | 0      | 0      | 0      | 0      | 0      | 0      | 0      | 0      | 0      | 0      | 0      | 0      | 0      | 0      |
| <b>Vibrio</b>               | 2              | 195            | 1      | 1      | 1      | 1      | 0      | 0      | 0      | 0      | 0      | 0      | 0      | 0      | 0      | 0      | 0      | 0      | 0      | 0      |
| <b>Vibrionales</b>          | 1              | 46             | 0      | 0      | 0      | 0      | 0      | 0      | 0      | 0      | 0      | 0      | 0      | 0      | 0      | 0      | 0      | 0      | 0      | 0      |
| <b>Vitreoscilla</b>         | 1              | 1              | 0      | 0      | 0      | 0      | 0      | 0      | 0      | 0      | 0      | 0      | 0      | 0      | 0      | 0      | 0      | 0      | 0      | 0      |
| <b>Vulcanisaeta</b>         | 1              | 14             | 0      | 0      | 0      | 0      | 0      | 0      | 0      | 0      | 0      | 0      | 0      | 0      | 0      | 0      | 0      | 0      | 1      | 0      |
| <b>Waddlia</b>              | 2              | 68             | 0      | 0      | 0      | 0      | 0      | 0      | 0      | 0      | 0      | 0      | 0      | 0      | 0      | 0      | 0      | 0      | 0      | 0      |
| <b>Wautersia</b>            | 1              | 2              | 0      | 0      | 0      | 0      | 0      | 0      | 0      | 0      | 0      | 0      | 0      | 0      | 0      | 0      | 0      | 0      | 0      | 0      |
| <b>Weeksella</b>            | 2              | 65             | 0      | 0      | 0      | 0      | 0      | 0      | 0      | 0      | 0      | 0      | 0      | 0      | 0      | 0      | 0      | 0      | 0      | 0      |



| Genus             | Cluster Number | Protein Counts | K10218 | K10219 | K10220 | K10221 | K10222 | K10616 | K10617 | K10618 | K10619 | K10621 | K10622 | K10623 | K10676 | K10700 | K10701 | K10702 | K11180 | K11946 |
|-------------------|----------------|----------------|--------|--------|--------|--------|--------|--------|--------|--------|--------|--------|--------|--------|--------|--------|--------|--------|--------|--------|
| Weissella         | 1              | 14             | 0      | 0      | 0      | 0      | 0      | 0      | 0      | 0      | 0      | 0      | 0      | 0      | 0      | 0      | 0      | 0      | 0      | 0      |
| Wenxinia          | 1              | 2              | 0      | 0      | 0      | 0      | 0      | 0      | 0      | 0      | 0      | 0      | 0      | 0      | 0      | 0      | 0      | 0      | 0      | 0      |
| Wigglesworthia    | 1              | 29             | 0      | 0      | 0      | 0      | 0      | 0      | 0      | 0      | 0      | 0      | 0      | 0      | 0      | 0      | 0      | 0      | 0      | 0      |
| Wolbachia         | 1              | 32             | 0      | 0      | 0      | 0      | 0      | 0      | 0      | 0      | 0      | 0      | 0      | 0      | 0      | 0      | 0      | 0      | 0      | 0      |
| Wolinella         | 2              | 51             | 0      | 0      | 0      | 0      | 0      | 0      | 0      | 0      | 0      | 0      | 0      | 0      | 0      | 0      | 0      | 0      | 0      | 0      |
| Xanthobacter      | 3              | 176            | 0      | 0      | 0      | 0      | 0      | 0      | 0      | 0      | 0      | 0      | 0      | 0      | 0      | 0      | 0      | 0      | 0      | 0      |
| Xanthobacteraceae | 1              | 4              | 0      | 0      | 0      | 0      | 0      | 0      | 0      | 0      | 0      | 0      | 0      | 0      | 0      | 0      | 0      | 0      | 0      | 0      |
| Xanthomonadaceae  | 1              | 39             | 0      | 0      | 0      | 0      | 0      | 0      | 0      | 0      | 0      | 0      | 0      | 0      | 0      | 0      | 0      | 0      | 0      | 0      |
| Xanthomonas       | 2              | 162            | 1      | 0      | 1      | 0      | 0      | 0      | 0      | 0      | 0      | 0      | 0      | 0      | 0      | 0      | 0      | 0      | 0      | 0      |
| Xenorhabdus       | 2              | 127            | 0      | 0      | 0      | 0      | 0      | 0      | 0      | 0      | 0      | 0      | 0      | 0      | 0      | 0      | 0      | 0      | 0      | 0      |
| Xylanimonas       | 2              | 66             | 0      | 0      | 0      | 0      | 0      | 0      | 0      | 0      | 0      | 0      | 0      | 0      | 0      | 0      | 0      | 0      | 0      | 0      |
| Xylella           | 2              | 52             | 0      | 0      | 0      | 0      | 0      | 0      | 0      | 0      | 0      | 0      | 0      | 0      | 0      | 0      | 0      | 0      | 0      | 0      |
| Yersinia          | 2              | 145            | 1      | 0      | 0      | 0      | 0      | 0      | 0      | 0      | 0      | 0      | 0      | 0      | 0      | 0      | 0      | 0      | 0      | 0      |
| Yokenella         | 2              | 61             | 0      | 0      | 0      | 0      | 0      | 0      | 0      | 0      | 0      | 0      | 0      | 0      | 0      | 0      | 0      | 0      | 0      | 0      |
| Zobellia          | 1              | 28             | 0      | 0      | 0      | 0      | 0      | 0      | 0      | 0      | 0      | 0      | 0      | 0      | 0      | 0      | 0      | 0      | 0      | 0      |
| Zunongwangia      | 2              | 98             | 0      | 0      | 0      | 0      | 0      | 0      | 0      | 0      | 0      | 0      | 0      | 0      | 0      | 0      | 0      | 0      | 0      | 0      |
| Zymomonas         | 2              | 67             | 0      | 0      | 0      | 0      | 0      | 0      | 0      | 0      | 0      | 0      | 0      | 0      | 0      | 0      | 0      | 0      | 0      | 0      |
| Zymophilus        | 1              | 2              | 0      | 0      | 0      | 0      | 0      | 0      | 0      | 0      | 0      | 0      | 0      | 0      | 0      | 0      | 0      | 0      | 0      | 0      |

| Genus               | Cluster Number | Protein Counts | K11947 | K11948 | K11949 | K13421 | K13953 | K14519 | K14520 | K14579 | K14582 | K14583 | K14584 | K14746 | K14747 | K14748 | K14751 | K15054 | K15058 | K15060 |
|---------------------|----------------|----------------|--------|--------|--------|--------|--------|--------|--------|--------|--------|--------|--------|--------|--------|--------|--------|--------|--------|--------|
| Acaricomes          | 1              | 2              | 0      | 0      | 0      | 0      | 0      | 0      | 0      | 0      | 0      | 0      | 0      | 0      | 0      | 0      | 0      | 0      | 0      | 0      |
| Acaryochloris       | 2              | 88             | 0      | 0      | 0      | 0      | 1      | 0      | 0      | 0      | 0      | 0      | 0      | 0      | 0      | 0      | 0      | 0      | 0      | 0      |
| Acetivibrio         | 1              | 2              | 0      | 0      | 0      | 0      | 0      | 0      | 0      | 0      | 0      | 0      | 0      | 0      | 0      | 0      | 0      | 0      | 0      | 0      |
| Acetobacter         | 2              | 85             | 0      | 0      | 0      | 0      | 1      | 0      | 0      | 0      | 0      | 0      | 0      | 0      | 0      | 0      | 0      | 0      | 0      | 0      |
| Acetobacteraceae    | 1              | 2              | 0      | 0      | 0      | 0      | 0      | 0      | 0      | 0      | 0      | 0      | 0      | 0      | 0      | 0      | 0      | 0      | 0      | 0      |
| Acetobacterium      | 1              | 8              | 0      | 0      | 0      | 0      | 0      | 0      | 0      | 0      | 0      | 0      | 0      | 0      | 0      | 0      | 0      | 0      | 0      | 0      |
| Acetohalobium       | 2              | 79             | 0      | 0      | 0      | 0      | 0      | 0      | 0      | 0      | 0      | 0      | 0      | 0      | 0      | 0      | 0      | 0      | 0      | 0      |
| Acholeplasma        | 2              | 38             | 0      | 0      | 0      | 0      | 0      | 0      | 0      | 0      | 0      | 0      | 0      | 0      | 0      | 0      | 0      | 0      | 0      | 0      |
| Achromobacter       | 2              | 192            | 0      | 0      | 0      | 0      | 1      | 0      | 1      | 0      | 0      | 0      | 0      | 0      | 0      | 0      | 0      | 0      | 1      | 0      |
| Acidaminococcus     | 1              | 65             | 0      | 0      | 0      | 0      | 0      | 0      | 0      | 0      | 0      | 0      | 0      | 0      | 0      | 0      | 0      | 0      | 0      | 0      |
| Acidianus           | 1              | 9              | 0      | 0      | 0      | 0      | 0      | 0      | 0      | 0      | 0      | 0      | 0      | 0      | 0      | 0      | 0      | 0      | 0      | 0      |
| Acidilobus          | 1              | 8              | 0      | 0      | 0      | 0      | 0      | 0      | 0      | 0      | 0      | 0      | 0      | 0      | 0      | 0      | 0      | 0      | 0      | 0      |
| Acidimicrobium      | 2              | 58             | 0      | 0      | 0      | 0      | 0      | 0      | 0      | 0      | 0      | 0      | 0      | 0      | 0      | 0      | 0      | 0      | 0      | 0      |
| Acidiphilium        | 3              | 144            | 0      | 0      | 0      | 0      | 1      | 1      | 0      | 0      | 0      | 0      | 0      | 0      | 0      | 0      | 0      | 0      | 0      | 0      |
| Acidithiobacillus   | 2              | 70             | 0      | 0      | 0      | 0      | 1      | 0      | 0      | 0      | 0      | 0      | 0      | 0      | 0      | 0      | 0      | 0      | 0      | 0      |
| Acidobacterium      | 2              | 91             | 0      | 0      | 0      | 0      | 1      | 1      | 0      | 0      | 0      | 0      | 0      | 0      | 0      | 0      | 0      | 0      | 0      | 0      |
| Acidocella          | 1              | 2              | 0      | 0      | 0      | 0      | 0      | 0      | 0      | 0      | 0      | 0      | 0      | 0      | 0      | 0      | 0      | 0      | 0      | 0      |
| Acidothermus        | 2              | 68             | 0      | 0      | 0      | 0      | 1      | 0      | 0      | 0      | 0      | 0      | 0      | 0      | 0      | 0      | 0      | 0      | 0      | 0      |
| Acidovorax          | 3              | 217            | 0      | 0      | 0      | 0      | 1      | 1      | 0      | 1      | 0      | 0      | 0      | 0      | 0      | 0      | 0      | 0      | 0      | 0      |
| Aciduliprofundum    | 1              | 11             | 0      | 0      | 0      | 0      | 1      | 0      | 0      | 0      | 0      | 0      | 0      | 0      | 0      | 0      | 0      | 0      | 0      | 0      |
| Acinetobacter       | 3              | 188            | 0      | 0      | 0      | 0      | 1      | 1      | 0      | 0      | 0      | 0      | 0      | 0      | 0      | 0      | 0      | 0      | 0      | 0      |
| Actinobacillus      | 2              | 112            | 0      | 0      | 0      | 0      | 1      | 0      | 0      | 0      | 0      | 0      | 0      | 0      | 0      | 0      | 0      | 0      | 0      | 0      |
| Actinomadura        | 1              | 1              | 0      | 0      | 0      | 0      | 0      | 0      | 0      | 0      | 0      | 0      | 0      | 0      | 0      | 0      | 0      | 0      | 0      | 0      |
| Actinoplanes        | 1              | 52             | 0      | 0      | 0      | 0      | 1      | 1      | 0      | 0      | 0      | 0      | 0      | 0      | 0      | 0      | 0      | 0      | 0      | 0      |
| Actinopolyspora     | 1              | 2              | 0      | 0      | 0      | 0      | 0      | 0      | 0      | 0      | 0      | 0      | 0      | 0      | 0      | 0      | 0      | 0      | 0      | 0      |
| Actinosynnema       | 2              | 122            | 0      | 0      | 0      | 0      | 1      | 1      | 0      | 0      | 0      | 0      | 0      | 0      | 0      | 0      | 0      | 0      | 0      | 0      |
| Advenella           | 1              | 30             | 0      | 0      | 0      | 0      | 1      | 0      | 0      | 0      | 0      | 0      | 0      | 0      | 0      | 0      | 0      | 0      | 0      | 0      |
| Aequorivita         | 1              | 12             | 0      | 0      | 0      | 0      | 0      | 0      | 0      | 0      | 0      | 0      | 0      | 0      | 0      | 0      | 0      | 0      | 0      | 0      |
| Aerococcus          | 2              | 57             | 0      | 0      | 0      | 0      | 0      | 0      | 0      | 0      | 0      | 0      | 0      | 0      | 0      | 0      | 0      | 0      | 0      | 0      |
| Aeromonas           | 2              | 127            | 0      | 0      | 0      | 0      | 0      | 0      | 0      | 0      | 0      | 0      | 0      | 0      | 0      | 0      | 0      | 0      | 0      | 0      |
| Aeropyrum           | 1              | 13             | 0      | 0      | 0      | 0      | 1      | 0      | 0      | 0      | 0      | 0      | 0      | 0      | 0      | 0      | 0      | 0      | 0      | 0      |
| Afipia              | 1              | 54             | 0      | 0      | 0      | 0      | 0      | 0      | 0      | 0      | 0      | 0      | 0      | 0      | 0      | 0      | 0      | 0      | 0      | 0      |
| Aggregatibacter     | 1              | 81             | 0      | 0      | 0      | 0      | 0      | 0      | 0      | 0      | 0      | 0      | 0      | 0      | 0      | 0      | 0      | 0      | 0      | 0      |
| Agrobacterium       | 2              | 242            | 0      | 0      | 0      | 0      | 1      | 1      | 0      | 0      | 0      | 0      | 0      | 0      | 0      | 0      | 0      | 1      | 0      | 0      |
| Ahrensia            | 1              | 2              | 0      | 0      | 0      | 0      | 0      | 0      | 0      | 0      | 0      | 0      | 0      | 0      | 0      | 0      | 0      | 0      | 0      | 0      |
| Akkermansia         | 2              | 47             | 0      | 0      | 0      | 0      | 0      | 0      | 0      | 0      | 0      | 0      | 0      | 0      | 0      | 0      | 0      | 0      | 0      | 0      |
| Albidiferax         | 3              | 144            | 0      | 0      | 0      | 0      | 0      | 0      | 0      | 0      | 0      | 0      | 0      | 0      | 0      | 0      | 0      | 0      | 0      | 0      |
| Alcaligenes         | 1              | 21             | 0      | 0      | 0      | 0      | 0      | 0      | 0      | 0      | 0      | 0      | 0      | 0      | 0      | 0      | 0      | 0      | 0      | 0      |
| Alcanivorax         | 2              | 146            | 0      | 0      | 0      | 0      | 1      | 0      | 0      | 0      | 0      | 0      | 0      | 0      | 0      | 0      | 0      | 0      | 0      | 0      |
| Alicyclophilus      | 3              | 152            | 0      | 0      | 0      | 0      | 1      | 0      | 0      | 0      | 0      | 0      | 0      | 0      | 0      | 0      | 0      | 0      | 0      | 0      |
| Alicyclobacillus    | 2              | 91             | 0      | 0      | 0      | 0      | 1      | 0      | 0      | 0      | 0      | 0      | 0      | 0      | 0      | 0      | 0      | 0      | 0      | 0      |
| Aliivibrio          | 2              | 118            | 0      | 0      | 0      | 0      | 0      | 0      | 0      | 0      | 0      | 0      | 0      | 0      | 0      | 0      | 0      | 0      | 0      | 0      |
| Alishewanella       | 1              | 1              | 0      | 0      | 0      | 0      | 0      | 0      | 0      | 0      | 0      | 0      | 0      | 0      | 0      | 0      | 0      | 0      | 0      | 0      |
| Alistipes           | 1              | 52             | 0      | 0      | 0      | 0      | 0      | 0      | 0      | 0      | 0      | 0      | 0      | 0      | 0      | 0      | 0      | 0      | 0      | 0      |
| Alkalilimnicola     | 2              | 97             | 0      | 0      | 0      | 0      | 1      | 0      | 0      | 0      | 0      | 0      | 0      | 0      | 0      | 0      | 0      | 0      | 0      | 1      |
| Alkaliphilus        | 2              | 62             | 0      | 0      | 0      | 0      | 0      | 0      | 0      | 0      | 0      | 0      | 0      | 0      | 0      | 0      | 0      | 0      | 0      | 0      |
| Allochromatium      | 2              | 84             | 0      | 0      | 0      | 0      | 0      | 0      | 0      | 0      | 0      | 0      | 0      | 0      | 0      | 0      | 0      | 0      | 0      | 0      |
| Alphaproteobacteria | 1              | 3              | 0      | 0      | 0      | 0      | 0      | 0      | 0      | 0      | 0      | 0      | 0      | 0      | 0      | 0      | 0      | 0      | 0      | 0      |
| Alteromonadales     | 1              | 12             | 0      | 0      | 0      | 0      | 0      | 0      | 0      | 0      | 0      | 0      | 0      | 0      | 0      | 0      | 0      | 0      | 0      | 0      |
| Alteromonas         | 1              | 37             | 0      | 0      | 0      | 0      | 0      | 0      | 0      | 0      | 0      | 0      | 0      | 0      | 0      | 0      | 0      | 0      | 0      | 0      |
| Aminobacter         | 1              | 4              | 0      | 0      | 0      | 0      | 0      | 0      | 0      | 0      | 0      | 0      | 0      | 0      | 0      | 0      | 0      | 0      | 0      | 0      |
| Aminobacterium      | 2              | 59             | 0      | 0      | 0      | 0      | 0      | 0      | 0      | 0      | 0      | 0      | 0      | 0      | 0      | 0      | 0      | 0      | 0      | 0      |

| Genus            | Cluster Number | Protein Counts | K11947 | K11948 | K11949 | K13421 | K13953 | K14519 | K14520 | K14579 | K14582 | K14583 | K14584 | K14746 | K14747 | K14748 | K14751 | K15054 | K15058 | K15060 |
|------------------|----------------|----------------|--------|--------|--------|--------|--------|--------|--------|--------|--------|--------|--------|--------|--------|--------|--------|--------|--------|--------|
| Ammonifex        | 2              | 50             | 0      | 0      | 0      | 0      | 1      | 0      | 0      | 0      | 0      | 0      | 0      | 0      | 0      | 0      | 0      | 0      | 0      | 0      |
| Amphibacillus    | 1              | 13             | 0      | 0      | 0      | 0      | 1      | 0      | 0      | 0      | 0      | 0      | 0      | 0      | 0      | 0      | 0      | 0      | 0      | 0      |
| Amphritea        | 1              | 2              | 0      | 0      | 0      | 0      | 0      | 0      | 0      | 0      | 0      | 0      | 0      | 0      | 0      | 0      | 0      | 0      | 0      | 0      |
| Amycolatopsis    | 2              | 201            | 0      | 0      | 0      | 0      | 1      | 1      | 0      | 0      | 0      | 0      | 0      | 0      | 0      | 0      | 0      | 0      | 0      | 0      |
| Amycolicoccus    | 1              | 43             | 0      | 0      | 0      | 0      | 1      | 0      | 0      | 0      | 0      | 0      | 0      | 0      | 0      | 0      | 0      | 0      | 0      | 0      |
| Anabaena         | 2              | 92             | 0      | 0      | 0      | 1      | 1      | 0      | 0      | 0      | 0      | 0      | 0      | 0      | 0      | 0      | 0      | 0      | 0      | 0      |
| Anaerobaculum    | 1              | 11             | 0      | 0      | 0      | 0      | 0      | 0      | 0      | 0      | 0      | 0      | 0      | 0      | 0      | 0      | 0      | 0      | 0      | 0      |
| Anaerococcus     | 2              | 46             | 0      | 0      | 0      | 0      | 0      | 0      | 0      | 0      | 0      | 0      | 0      | 0      | 0      | 0      | 0      | 0      | 0      | 0      |
| Anaerolinea      | 2              | 66             | 0      | 0      | 0      | 0      | 1      | 0      | 0      | 0      | 0      | 0      | 0      | 0      | 0      | 0      | 0      | 0      | 0      | 0      |
| Anaeromyxobacter | 3              | 117            | 0      | 0      | 0      | 0      | 1      | 0      | 0      | 0      | 0      | 0      | 0      | 0      | 0      | 0      | 0      | 0      | 0      | 0      |
| Anaerostipes     | 1              | 44             | 0      | 0      | 0      | 0      | 0      | 0      | 0      | 0      | 0      | 0      | 0      | 0      | 0      | 0      | 0      | 0      | 0      | 0      |
| Anaerotruncus    | 1              | 2              | 0      | 0      | 0      | 0      | 0      | 0      | 0      | 0      | 0      | 0      | 0      | 0      | 0      | 0      | 0      | 0      | 0      | 0      |
| Anaplasma        | 1              | 35             | 0      | 0      | 0      | 0      | 0      | 0      | 0      | 0      | 0      | 0      | 0      | 0      | 0      | 0      | 0      | 0      | 0      | 0      |
| Ancylobacter     | 1              | 3              | 0      | 0      | 0      | 0      | 0      | 0      | 0      | 0      | 0      | 0      | 0      | 0      | 0      | 0      | 0      | 0      | 0      | 0      |
| Aneurinibacillus | 1              | 1              | 0      | 0      | 0      | 0      | 0      | 0      | 0      | 0      | 0      | 0      | 0      | 0      | 0      | 0      | 0      | 0      | 0      | 0      |
| Angomonas        | 1              | 1              | 0      | 0      | 0      | 0      | 0      | 0      | 0      | 0      | 0      | 0      | 0      | 0      | 0      | 0      | 0      | 0      | 0      | 0      |
| Anoxybacillus    | 2              | 72             | 0      | 0      | 0      | 0      | 1      | 0      | 0      | 0      | 0      | 0      | 0      | 0      | 0      | 0      | 0      | 0      | 0      | 0      |
| Aquifex          | 2              | 45             | 0      | 0      | 0      | 0      | 0      | 0      | 0      | 0      | 0      | 0      | 0      | 0      | 0      | 0      | 0      | 0      | 0      | 0      |
| Aquimarina       | 1              | 2              | 0      | 0      | 0      | 0      | 0      | 0      | 0      | 0      | 0      | 0      | 0      | 0      | 0      | 0      | 0      | 0      | 0      | 0      |
| Arcanobacterium  | 2              | 45             | 0      | 0      | 0      | 0      | 0      | 0      | 0      | 0      | 0      | 0      | 0      | 0      | 0      | 0      | 0      | 0      | 0      | 0      |
| Archaeoglobus    | 1              | 14             | 0      | 0      | 0      | 0      | 0      | 0      | 0      | 0      | 0      | 0      | 0      | 0      | 0      | 0      | 0      | 0      | 0      | 0      |
| Arcobacter       | 2              | 101            | 0      | 0      | 0      | 0      | 0      | 0      | 0      | 0      | 0      | 0      | 0      | 0      | 0      | 0      | 0      | 0      | 0      | 0      |
| Aromatoleum      | 3              | 133            | 0      | 0      | 0      | 0      | 0      | 0      | 0      | 0      | 0      | 0      | 0      | 1      | 1      | 0      | 0      | 0      | 0      | 0      |
| Arsenophonus     | 1              | 4              | 0      | 0      | 0      | 0      | 0      | 0      | 0      | 0      | 0      | 0      | 0      | 0      | 0      | 0      | 0      | 0      | 0      | 0      |
| Arthrobacter     | 2              | 206            | 0      | 0      | 0      | 0      | 1      | 1      | 0      | 0      | 0      | 0      | 0      | 0      | 0      | 0      | 0      | 0      | 0      | 0      |
| Arthrospira      | 2              | 67             | 0      | 0      | 0      | 1      | 0      | 0      | 0      | 0      | 0      | 0      | 0      | 0      | 0      | 0      | 0      | 0      | 0      | 0      |
| Aster            | 1              | 10             | 0      | 0      | 0      | 0      | 0      | 0      | 0      | 0      | 0      | 0      | 0      | 0      | 0      | 0      | 0      | 0      | 0      | 0      |
| Asticcacaulis    | 2              | 103            | 0      | 0      | 0      | 0      | 1      | 0      | 0      | 0      | 0      | 0      | 0      | 0      | 0      | 0      | 0      | 0      | 0      | 0      |
| Atopobium        | 1              | 28             | 0      | 0      | 0      | 0      | 0      | 0      | 0      | 0      | 0      | 0      | 0      | 0      | 0      | 0      | 0      | 0      | 0      | 0      |
| Aurantimonas     | 1              | 2              | 0      | 0      | 0      | 0      | 0      | 0      | 0      | 0      | 0      | 0      | 0      | 0      | 0      | 0      | 0      | 0      | 0      | 0      |
| Avibacterium     | 1              | 17             | 0      | 0      | 0      | 0      | 0      | 0      | 0      | 0      | 0      | 0      | 0      | 0      | 0      | 0      | 0      | 0      | 0      | 0      |
| Azoarcus         | 3              | 172            | 0      | 0      | 0      | 0      | 1      | 0      | 0      | 0      | 0      | 0      | 0      | 0      | 0      | 0      | 0      | 1      | 0      | 0      |
| Azorhizobium     | 3              | 149            | 0      | 0      | 0      | 0      | 1      | 0      | 0      | 0      | 0      | 0      | 0      | 0      | 0      | 0      | 0      | 0      | 0      | 0      |
| Azorhizophilus   | 1              | 4              | 0      | 0      | 0      | 0      | 0      | 0      | 0      | 0      | 0      | 0      | 0      | 0      | 0      | 0      | 0      | 0      | 0      | 0      |
| Azospira         | 1              | 19             | 0      | 0      | 0      | 0      | 1      | 0      | 0      | 0      | 0      | 0      | 0      | 0      | 0      | 0      | 0      | 0      | 0      | 0      |
| Azospirillum     | 2              | 198            | 0      | 0      | 0      | 0      | 1      | 1      | 0      | 0      | 0      | 0      | 0      | 0      | 0      | 0      | 0      | 0      | 0      | 0      |
| Azotobacter      | 3              | 183            | 0      | 0      | 0      | 0      | 1      | 1      | 0      | 0      | 0      | 0      | 0      | 0      | 0      | 1      | 0      | 0      | 0      | 0      |
| Bacillales       | 1              | 9              | 0      | 0      | 0      | 0      | 0      | 0      | 0      | 0      | 0      | 0      | 0      | 0      | 0      | 0      | 0      | 0      | 0      | 0      |
| Bacilli          | 1              | 3              | 0      | 0      | 0      | 0      | 0      | 0      | 0      | 0      | 0      | 0      | 0      | 0      | 0      | 0      | 0      | 0      | 0      | 0      |
| Bacillus         | 2              | 237            | 0      | 0      | 0      | 0      | 1      | 0      | 0      | 0      | 0      | 0      | 0      | 0      | 0      | 0      | 0      | 0      | 0      | 0      |
| Bacteria         | 2              | 86             | 0      | 0      | 0      | 0      | 1      | 0      | 0      | 0      | 0      | 0      | 0      | 0      | 0      | 0      | 0      | 0      | 0      | 0      |
| Bacteriovorax    | 2              | 98             | 0      | 0      | 0      | 0      | 0      | 0      | 0      | 0      | 0      | 0      | 0      | 0      | 0      | 0      | 0      | 0      | 0      | 0      |
| Bacteroidales    | 2              | 59             | 0      | 0      | 0      | 0      | 0      | 0      | 0      | 0      | 0      | 0      | 0      | 0      | 0      | 0      | 0      | 0      | 0      | 0      |
| Bacteroides      | 2              | 96             | 0      | 0      | 0      | 0      | 0      | 0      | 0      | 0      | 0      | 0      | 0      | 0      | 0      | 0      | 0      | 0      | 0      | 0      |
| Bacteroidetes    | 1              | 2              | 0      | 0      | 0      | 0      | 0      | 0      | 0      | 0      | 0      | 0      | 0      | 0      | 0      | 0      | 0      | 0      | 0      | 0      |
| Bartonella       | 2              | 50             | 0      | 0      | 0      | 0      | 0      | 0      | 0      | 0      | 0      | 0      | 0      | 0      | 0      | 0      | 0      | 0      | 0      | 0      |
| Baumannia        | 2              | 24             | 0      | 0      | 0      | 0      | 0      | 0      | 0      | 0      | 0      | 0      | 0      | 0      | 0      | 0      | 0      | 0      | 0      | 0      |
| Bdellovibrio     | 2              | 87             | 0      | 0      | 0      | 0      | 1      | 0      | 0      | 0      | 0      | 0      | 0      | 0      | 0      | 0      | 0      | 0      | 0      | 0      |
| Beijerinckia     | 3              | 123            | 0      | 0      | 0      | 0      | 1      | 1      | 0      | 0      | 0      | 0      | 0      | 0      | 0      | 0      | 0      | 0      | 0      | 0      |
| Belliella        | 1              | 14             | 0      | 0      | 0      | 0      | 0      | 0      | 0      | 0      | 0      | 0      | 0      | 0      | 0      | 0      | 0      | 0      | 0      | 0      |
| Beutenbergia     | 2              | 82             | 0      | 0      | 0      | 0      | 0      | 1      | 0      | 0      | 0      | 0      | 0      | 0      | 0      | 0      | 0      | 0      | 0      | 0      |
| Bifidobacterium  | 2              | 61             | 0      | 0      | 0      | 0      | 1      | 0      | 0      | 0      | 0      | 0      | 0      | 0      | 0      | 0      | 0      | 0      | 0      | 0      |

| Genus                | Cluster Number | Protein Counts | K11947 | K11948 | K11949 | K13421 | K13953 | K14519 | K14520 | K14579 | K14582 | K14583 | K14584 | K14746 | K14747 | K14748 | K14751 | K15054 | K15058 | K15060 |
|----------------------|----------------|----------------|--------|--------|--------|--------|--------|--------|--------|--------|--------|--------|--------|--------|--------|--------|--------|--------|--------|--------|
| Bizionia             | 1              | 1              | 0      | 0      | 0      | 0      | 0      | 0      | 0      | 0      | 0      | 0      | 0      | 0      | 0      | 0      | 0      | 0      | 0      | 0      |
| Blastococcus         | 1              | 39             | 0      | 0      | 0      | 0      | 0      | 1      | 0      | 0      | 0      | 0      | 0      | 0      | 0      | 0      | 0      | 0      | 0      | 0      |
| Blattabacterium      | 1              | 23             | 0      | 0      | 0      | 1      | 0      | 0      | 0      | 0      | 0      | 0      | 0      | 0      | 0      | 0      | 0      | 0      | 0      | 0      |
| Blautia              | 1              | 22             | 0      | 0      | 0      | 0      | 0      | 0      | 0      | 0      | 0      | 0      | 0      | 0      | 0      | 0      | 0      | 0      | 0      | 0      |
| Bordetella           | 3              | 227            | 0      | 0      | 0      | 0      | 1      | 1      | 0      | 0      | 0      | 0      | 0      | 0      | 0      | 0      | 0      | 1      | 1      | 0      |
| Borrelia             | 1              | 32             | 0      | 0      | 0      | 0      | 0      | 0      | 0      | 0      | 0      | 0      | 0      | 0      | 0      | 0      | 0      | 0      | 0      | 0      |
| Brachybacterium      | 1              | 18             | 0      | 0      | 0      | 0      | 0      | 0      | 0      | 0      | 0      | 0      | 0      | 0      | 0      | 0      | 0      | 0      | 0      | 0      |
| Brachymonas          | 1              | 4              | 0      | 0      | 0      | 0      | 0      | 0      | 0      | 0      | 0      | 0      | 0      | 0      | 0      | 0      | 0      | 0      | 0      | 0      |
| Brachyspira          | 2              | 79             | 0      | 0      | 0      | 0      | 0      | 0      | 0      | 0      | 0      | 0      | 0      | 0      | 0      | 0      | 0      | 0      | 0      | 0      |
| Bradyrhizobiaceae    | 1              | 20             | 0      | 0      | 0      | 0      | 0      | 0      | 0      | 0      | 0      | 0      | 0      | 0      | 0      | 0      | 0      | 0      | 0      | 0      |
| Bradyrhizobium       | 3              | 254            | 0      | 0      | 0      | 0      | 1      | 0      | 1      | 0      | 0      | 0      | 0      | 0      | 0      | 0      | 0      | 0      | 0      | 0      |
| Brenneria            | 1              | 20             | 0      | 0      | 0      | 0      | 0      | 0      | 0      | 0      | 0      | 0      | 0      | 0      | 0      | 0      | 0      | 0      | 0      | 0      |
| Brevibacillus        | 2              | 122            | 0      | 0      | 0      | 0      | 1      | 0      | 0      | 0      | 0      | 0      | 0      | 0      | 0      | 0      | 0      | 0      | 0      | 0      |
| Brevibacterium       | 1              | 4              | 0      | 0      | 0      | 0      | 0      | 0      | 0      | 0      | 0      | 0      | 0      | 0      | 0      | 0      | 0      | 0      | 0      | 0      |
| Brevundimonas        | 2              | 105            | 0      | 0      | 0      | 0      | 0      | 0      | 0      | 0      | 0      | 0      | 0      | 0      | 0      | 0      | 0      | 0      | 0      | 0      |
| Brucella             | 3              | 138            | 0      | 0      | 0      | 0      | 1      | 0      | 0      | 0      | 0      | 0      | 0      | 0      | 0      | 0      | 0      | 0      | 0      | 0      |
| Buchnera             | 1              | 26             | 0      | 0      | 0      | 0      | 0      | 0      | 0      | 0      | 0      | 0      | 0      | 0      | 0      | 0      | 0      | 0      | 0      | 0      |
| Burkholderia         | 3              | 424            | 0      | 0      | 0      | 0      | 1      | 1      | 1      | 1      | 1      | 1      | 0      | 0      | 0      | 0      | 0      | 1      | 1      | 1      |
| Burkholderiaceae     | 3              | 143            | 0      | 0      | 0      | 0      | 0      | 0      | 0      | 0      | 0      | 0      | 0      | 0      | 0      | 0      | 0      | 1      | 1      | 0      |
| Burkholderiales      | 1              | 24             | 0      | 0      | 0      | 0      | 0      | 0      | 0      | 0      | 0      | 0      | 0      | 0      | 0      | 0      | 0      | 0      | 0      | 0      |
| Buttiauxella         | 1              | 2              | 0      | 0      | 0      | 0      | 0      | 0      | 0      | 0      | 0      | 0      | 0      | 0      | 0      | 0      | 0      | 0      | 0      | 0      |
| Butyrivibrio         | 2              | 67             | 0      | 0      | 0      | 0      | 0      | 0      | 0      | 0      | 0      | 0      | 0      | 0      | 0      | 0      | 0      | 0      | 0      | 0      |
| Caldanaerobacter     | 2              | 63             | 0      | 0      | 0      | 0      | 0      | 0      | 0      | 0      | 0      | 0      | 0      | 0      | 0      | 0      | 0      | 0      | 0      | 0      |
| Caldicellulosiruptor | 2              | 75             | 0      | 0      | 0      | 0      | 1      | 0      | 0      | 0      | 0      | 0      | 0      | 0      | 0      | 0      | 0      | 0      | 0      | 0      |
| Caldilinea           | 1              | 23             | 0      | 0      | 0      | 1      | 1      | 0      | 0      | 0      | 0      | 0      | 0      | 0      | 0      | 0      | 0      | 0      | 0      | 0      |
| Caldimonas           | 1              | 6              | 0      | 0      | 0      | 0      | 0      | 0      | 0      | 0      | 0      | 0      | 0      | 0      | 0      | 0      | 0      | 0      | 0      | 0      |
| Caldisericum         | 1              | 10             | 0      | 0      | 0      | 0      | 1      | 0      | 0      | 0      | 0      | 0      | 0      | 0      | 0      | 0      | 0      | 0      | 0      | 0      |
| Caldisphaera         | 1              | 7              | 0      | 0      | 0      | 0      | 0      | 0      | 0      | 0      | 0      | 0      | 0      | 0      | 0      | 0      | 0      | 0      | 0      | 0      |
| Calditerrivibrio     | 2              | 74             | 0      | 0      | 0      | 0      | 0      | 0      | 0      | 0      | 0      | 0      | 0      | 0      | 0      | 0      | 0      | 0      | 0      | 0      |
| Caldivirga           | 1              | 13             | 0      | 0      | 0      | 0      | 1      | 0      | 0      | 0      | 0      | 0      | 0      | 0      | 0      | 0      | 0      | 0      | 0      | 0      |
| Calothrix            | 1              | 43             | 0      | 0      | 0      | 1      | 0      | 0      | 0      | 0      | 0      | 0      | 0      | 0      | 0      | 0      | 0      | 0      | 0      | 0      |
| Calyptogena          | 2              | 34             | 0      | 0      | 0      | 0      | 0      | 0      | 0      | 0      | 0      | 0      | 0      | 0      | 0      | 0      | 0      | 0      | 0      | 0      |
| Campylobacter        | 2              | 80             | 0      | 0      | 0      | 0      | 0      | 0      | 0      | 0      | 0      | 0      | 0      | 0      | 0      | 0      | 0      | 0      | 0      | 0      |
| Candidatus           | 2              | 290            | 0      | 0      | 0      | 0      | 1      | 0      | 0      | 0      | 0      | 0      | 0      | 0      | 0      | 0      | 0      | 0      | 0      | 0      |
| Capnocytophaga       | 1              | 50             | 0      | 0      | 0      | 0      | 0      | 0      | 0      | 0      | 0      | 0      | 0      | 0      | 0      | 0      | 0      | 0      | 0      | 0      |
| Carbophilus          | 1              | 2              | 0      | 0      | 0      | 0      | 0      | 0      | 0      | 0      | 0      | 0      | 0      | 0      | 0      | 0      | 0      | 0      | 0      | 0      |
| Carboxydibrachium    | 1              | 14             | 0      | 0      | 0      | 0      | 0      | 0      | 0      | 0      | 0      | 0      | 0      | 0      | 0      | 0      | 0      | 0      | 0      | 0      |
| Carboxydotherrmus    | 2              | 68             | 0      | 0      | 0      | 0      | 0      | 0      | 0      | 0      | 0      | 0      | 0      | 0      | 0      | 0      | 0      | 0      | 0      | 0      |
| Carica               | 1              | 2              | 0      | 0      | 0      | 0      | 0      | 0      | 0      | 0      | 0      | 0      | 0      | 0      | 0      | 0      | 0      | 0      | 0      | 0      |
| Carnobacterium       | 2              | 71             | 0      | 0      | 0      | 0      | 0      | 0      | 0      | 0      | 0      | 0      | 0      | 0      | 0      | 0      | 0      | 0      | 0      | 0      |
| Catenibacterium      | 1              | 2              | 0      | 0      | 0      | 0      | 0      | 0      | 0      | 0      | 0      | 0      | 0      | 0      | 0      | 0      | 0      | 0      | 0      | 0      |
| Catenovulum          | 1              | 2              | 0      | 0      | 0      | 0      | 0      | 0      | 0      | 0      | 0      | 0      | 0      | 0      | 0      | 0      | 0      | 0      | 0      | 0      |
| Catenulispora        | 3              | 159            | 0      | 0      | 0      | 0      | 1      | 1      | 0      | 0      | 0      | 0      | 0      | 0      | 0      | 0      | 0      | 0      | 0      | 0      |
| Caulobacter          | 3              | 168            | 0      | 0      | 0      | 0      | 1      | 1      | 0      | 0      | 0      | 0      | 0      | 0      | 0      | 0      | 0      | 0      | 0      | 0      |
| Cedecea              | 1              | 45             | 0      | 0      | 0      | 0      | 0      | 0      | 0      | 0      | 0      | 0      | 0      | 0      | 0      | 0      | 0      | 0      | 0      | 0      |
| Cellulomonas         | 2              | 96             | 0      | 0      | 0      | 0      | 0      | 0      | 0      | 0      | 0      | 0      | 0      | 0      | 0      | 0      | 0      | 0      | 0      | 0      |
| Cellulophaga         | 2              | 105            | 0      | 0      | 0      | 0      | 0      | 1      | 0      | 0      | 0      | 0      | 0      | 0      | 0      | 0      | 0      | 0      | 0      | 0      |
| Cellulosilyticum     | 1              | 14             | 0      | 0      | 0      | 0      | 0      | 0      | 0      | 0      | 0      | 0      | 0      | 0      | 0      | 0      | 0      | 0      | 0      | 0      |
| Cellvibrio           | 2              | 85             | 0      | 0      | 0      | 0      | 0      | 0      | 0      | 0      | 0      | 0      | 0      | 0      | 0      | 0      | 0      | 0      | 0      | 0      |
| Cenarchaeum          | 1              | 7              | 0      | 0      | 0      | 0      | 1      | 0      | 0      | 0      | 0      | 0      | 0      | 0      | 0      | 0      | 0      | 0      | 0      | 0      |
| Chamaesiphon         | 1              | 13             | 0      | 0      | 0      | 0      | 0      | 0      | 0      | 0      | 0      | 0      | 0      | 0      | 0      | 0      | 0      | 0      | 0      | 0      |
| Chelativorans        | 3              | 136            | 0      | 0      | 0      | 0      | 1      | 1      | 0      | 0      | 0      | 0      | 0      | 0      | 0      | 0      | 0      | 0      | 0      | 0      |

| Genus                  | Cluster Number | Protein Counts | K11947 | K11948 | K11949 | K13421 | K13953 | K14519 | K14520 | K14579 | K14582 | K14583 | K14584 | K14746 | K14747 | K14748 | K14751 | K15054 | K15058 | K15060 |
|------------------------|----------------|----------------|--------|--------|--------|--------|--------|--------|--------|--------|--------|--------|--------|--------|--------|--------|--------|--------|--------|--------|
| Chelatococcus          | 1              | 2              | 0      | 0      | 0      | 0      | 0      | 0      | 0      | 0      | 0      | 0      | 0      | 0      | 0      | 0      | 0      | 0      | 0      | 0      |
| Chitinophaga           | 2              | 98             | 0      | 0      | 0      | 0      | 0      | 1      | 0      | 0      | 0      | 0      | 0      | 0      | 0      | 0      | 0      | 0      | 0      | 0      |
| Chlamydia              | 1              | 36             | 0      | 0      | 0      | 0      | 0      | 0      | 0      | 0      | 0      | 0      | 0      | 0      | 0      | 0      | 0      | 0      | 0      | 0      |
| Chlamydomonas          | 1              | 3              | 0      | 0      | 0      | 0      | 0      | 0      | 0      | 0      | 0      | 0      | 0      | 0      | 0      | 0      | 0      | 0      | 0      | 0      |
| Chlamydomphila         | 1              | 31             | 0      | 0      | 0      | 0      | 0      | 0      | 0      | 0      | 0      | 0      | 0      | 0      | 0      | 0      | 0      | 0      | 0      | 0      |
| Chlorobaculum          | 2              | 61             | 0      | 0      | 0      | 0      | 1      | 0      | 0      | 0      | 0      | 0      | 0      | 0      | 0      | 0      | 0      | 0      | 0      | 0      |
| Chlorobium             | 2              | 89             | 0      | 0      | 0      | 0      | 1      | 0      | 0      | 0      | 0      | 0      | 0      | 0      | 0      | 0      | 0      | 0      | 0      | 0      |
| Chlorobium/Pelodictyon | 1              | 2              | 0      | 0      | 0      | 0      | 0      | 0      | 0      | 0      | 0      | 0      | 0      | 0      | 0      | 0      | 0      | 0      | 0      | 0      |
| Chloroflexus           | 2              | 105            | 0      | 0      | 0      | 0      | 1      | 0      | 0      | 0      | 0      | 0      | 0      | 0      | 0      | 0      | 0      | 0      | 0      | 0      |
| Chlorogloeopsis        | 1              | 9              | 0      | 0      | 0      | 0      | 0      | 0      | 0      | 0      | 0      | 0      | 0      | 0      | 0      | 0      | 0      | 0      | 0      | 0      |
| Chloroherpeton         | 2              | 59             | 0      | 0      | 0      | 0      | 0      | 0      | 0      | 0      | 0      | 0      | 0      | 0      | 0      | 0      | 0      | 0      | 0      | 0      |
| Chromobacterium        | 2              | 117            | 0      | 0      | 0      | 0      | 0      | 1      | 0      | 0      | 0      | 0      | 0      | 0      | 0      | 0      | 0      | 0      | 0      | 0      |
| Chromohalobacter       | 2              | 145            | 0      | 0      | 0      | 0      | 1      | 1      | 0      | 0      | 0      | 0      | 0      | 0      | 0      | 0      | 0      | 1      | 0      | 0      |
| Chroococciopsis        | 1              | 24             | 0      | 0      | 0      | 1      | 1      | 0      | 0      | 0      | 0      | 0      | 0      | 0      | 0      | 0      | 0      | 0      | 0      | 0      |
| Chryseobacterium       | 2              | 104            | 0      | 0      | 0      | 0      | 0      | 0      | 0      | 0      | 0      | 0      | 0      | 0      | 0      | 0      | 0      | 0      | 0      | 0      |
| Citricella             | 1              | 13             | 0      | 0      | 0      | 0      | 0      | 0      | 0      | 0      | 0      | 0      | 0      | 0      | 0      | 0      | 0      | 0      | 0      | 0      |
| Citrobacter            | 2              | 190            | 0      | 0      | 0      | 0      | 0      | 1      | 0      | 0      | 0      | 0      | 0      | 0      | 0      | 0      | 0      | 0      | 0      | 0      |
| Clavibacter            | 2              | 83             | 0      | 0      | 0      | 0      | 1      | 1      | 0      | 0      | 0      | 0      | 0      | 0      | 0      | 0      | 0      | 0      | 0      | 0      |
| Clonorchis             | 1              | 1              | 0      | 0      | 0      | 0      | 0      | 0      | 0      | 0      | 0      | 0      | 0      | 0      | 0      | 0      | 0      | 0      | 0      | 0      |
| Clostridiales          | 2              | 77             | 0      | 0      | 0      | 0      | 0      | 0      | 0      | 0      | 0      | 0      | 0      | 0      | 0      | 0      | 0      | 0      | 0      | 0      |
| Clostridium            | 2              | 191            | 0      | 0      | 0      | 0      | 1      | 0      | 0      | 0      | 0      | 0      | 0      | 0      | 0      | 0      | 0      | 0      | 0      | 0      |
| Cohnella               | 1              | 2              | 0      | 0      | 0      | 0      | 0      | 0      | 0      | 0      | 0      | 0      | 0      | 0      | 0      | 0      | 0      | 0      | 0      | 0      |
| Coleofasciculus        | 1              | 4              | 0      | 0      | 0      | 0      | 0      | 0      | 0      | 0      | 0      | 0      | 0      | 0      | 0      | 0      | 0      | 0      | 0      | 0      |
| Collimonas             | 1              | 35             | 0      | 0      | 0      | 0      | 0      | 1      | 0      | 0      | 0      | 0      | 0      | 0      | 0      | 0      | 0      | 0      | 0      | 0      |
| Colwellia              | 2              | 130            | 0      | 0      | 0      | 0      | 1      | 1      | 0      | 0      | 0      | 0      | 0      | 0      | 0      | 0      | 0      | 0      | 0      | 0      |
| Comamonas              | 2              | 196            | 0      | 0      | 0      | 0      | 1      | 1      | 0      | 1      | 1      | 0      | 0      | 0      | 0      | 0      | 0      | 0      | 0      | 0      |
| Conexibacter           | 3              | 117            | 0      | 0      | 0      | 0      | 1      | 1      | 0      | 0      | 0      | 0      | 0      | 0      | 0      | 1      | 0      | 0      | 0      | 0      |
| Coprobacillus          | 1              | 2              | 0      | 0      | 0      | 0      | 0      | 0      | 0      | 0      | 0      | 0      | 0      | 0      | 0      | 0      | 0      | 0      | 0      | 0      |
| Coprococcus            | 2              | 76             | 0      | 0      | 0      | 0      | 0      | 0      | 0      | 0      | 0      | 0      | 0      | 0      | 0      | 0      | 0      | 0      | 0      | 0      |
| Coprothermobacter      | 2              | 45             | 0      | 0      | 0      | 0      | 0      | 0      | 0      | 0      | 0      | 0      | 0      | 0      | 0      | 0      | 0      | 0      | 0      | 0      |
| Coralimargarita        | 2              | 68             | 0      | 0      | 0      | 0      | 0      | 0      | 0      | 0      | 0      | 0      | 0      | 0      | 0      | 0      | 0      | 0      | 0      | 0      |
| Corallococcus          | 1              | 29             | 0      | 0      | 0      | 0      | 1      | 0      | 0      | 0      | 0      | 0      | 0      | 0      | 0      | 0      | 0      | 0      | 0      | 0      |
| Coriobacterium         | 2              | 36             | 0      | 0      | 0      | 0      | 0      | 0      | 0      | 0      | 0      | 0      | 0      | 0      | 0      | 0      | 0      | 0      | 0      | 0      |
| Corynebacterineae      | 1              | 5              | 0      | 0      | 0      | 0      | 0      | 0      | 0      | 0      | 0      | 0      | 0      | 0      | 0      | 0      | 0      | 0      | 0      | 0      |
| Corynebacterium        | 2              | 175            | 0      | 0      | 0      | 0      | 1      | 1      | 0      | 0      | 0      | 0      | 0      | 0      | 0      | 0      | 0      | 0      | 0      | 0      |
| Coxiella               | 2              | 54             | 0      | 0      | 0      | 0      | 0      | 0      | 0      | 0      | 0      | 0      | 0      | 0      | 0      | 0      | 0      | 0      | 0      | 0      |
| Crinalium              | 1              | 21             | 0      | 0      | 0      | 1      | 0      | 0      | 0      | 0      | 0      | 0      | 0      | 0      | 0      | 0      | 0      | 0      | 0      | 0      |
| Croceibacter           | 2              | 80             | 0      | 0      | 0      | 0      | 0      | 0      | 0      | 0      | 0      | 0      | 0      | 0      | 0      | 0      | 0      | 0      | 0      | 0      |
| Crocospaera            | 1              | 6              | 0      | 0      | 0      | 0      | 0      | 0      | 0      | 0      | 0      | 0      | 0      | 0      | 0      | 0      | 0      | 0      | 0      | 0      |
| Cronobacter            | 2              | 120            | 0      | 0      | 0      | 0      | 1      | 0      | 0      | 0      | 0      | 0      | 0      | 0      | 0      | 0      | 0      | 0      | 0      | 0      |
| Cryptobacterium        | 2              | 39             | 0      | 0      | 0      | 0      | 0      | 0      | 0      | 0      | 0      | 0      | 0      | 0      | 0      | 0      | 0      | 0      | 0      | 0      |
| Cucumis                | 1              | 9              | 0      | 0      | 0      | 0      | 0      | 0      | 0      | 0      | 0      | 0      | 0      | 0      | 0      | 0      | 0      | 0      | 0      | 0      |
| Cupriavidus            | 3              | 317            | 0      | 0      | 0      | 0      | 1      | 1      | 0      | 0      | 0      | 0      | 0      | 0      | 0      | 0      | 0      | 1      | 0      | 0      |
| Curtobacterium         | 1              | 5              | 0      | 0      | 0      | 0      | 0      | 0      | 0      | 0      | 0      | 0      | 0      | 0      | 0      | 0      | 0      | 0      | 0      | 0      |
| Curvibacter            | 1              | 27             | 0      | 0      | 0      | 0      | 0      | 0      | 0      | 0      | 0      | 0      | 0      | 0      | 0      | 0      | 0      | 0      | 0      | 0      |
| Cyanobacterium         | 1              | 9              | 0      | 0      | 0      | 0      | 0      | 0      | 0      | 0      | 0      | 0      | 0      | 0      | 0      | 0      | 0      | 0      | 0      | 0      |
| Cyanobium              | 1              | 10             | 0      | 0      | 0      | 1      | 1      | 0      | 0      | 0      | 0      | 0      | 0      | 0      | 0      | 0      | 0      | 0      | 0      | 0      |
| Cyanothece             | 1              | 34             | 0      | 0      | 0      | 1      | 1      | 0      | 0      | 0      | 0      | 0      | 0      | 0      | 0      | 0      | 0      | 0      | 0      | 0      |
| Cyclobacterium         | 1              | 19             | 0      | 0      | 0      | 0      | 0      | 1      | 0      | 0      | 0      | 0      | 0      | 0      | 0      | 0      | 0      | 0      | 0      | 0      |
| Cycloclasticus         | 1              | 21             | 0      | 0      | 0      | 0      | 0      | 0      | 0      | 0      | 0      | 0      | 0      | 0      | 0      | 1      | 0      | 0      | 0      | 0      |
| Cylindrospermopsis     | 1              | 4              | 0      | 0      | 0      | 0      | 0      | 0      | 0      | 0      | 0      | 0      | 0      | 0      | 0      | 0      | 0      | 0      | 0      | 0      |
| Cylindrospermum        | 1              | 30             | 0      | 0      | 0      | 1      | 1      | 0      | 0      | 0      | 0      | 0      | 0      | 0      | 0      | 0      | 0      | 0      | 0      | 0      |

| Genus              | Cluster Number | Protein Counts | K11947 | K11948 | K11949 | K13421 | K13953 | K14519 | K14520 | K14579 | K14582 | K14583 | K14584 | K14746 | K14747 | K14748 | K14751 | K15054 | K15058 | K15060 |
|--------------------|----------------|----------------|--------|--------|--------|--------|--------|--------|--------|--------|--------|--------|--------|--------|--------|--------|--------|--------|--------|--------|
| Cytophaga          | 2              | 69             | 0      | 0      | 0      | 0      | 0      | 0      | 0      | 0      | 0      | 0      | 0      | 0      | 0      | 0      | 0      | 0      | 0      | 0      |
| Dactylococcopsis   | 1              | 8              | 0      | 0      | 0      | 0      | 0      | 0      | 0      | 0      | 0      | 0      | 0      | 0      | 0      | 0      | 0      | 0      | 0      | 0      |
| Dechloromonas      | 1              | 40             | 0      | 0      | 0      | 0      | 0      | 0      | 0      | 0      | 0      | 0      | 0      | 0      | 0      | 1      | 0      | 0      | 0      | 0      |
| Dechlorosoma       | 1              | 19             | 0      | 0      | 0      | 0      | 1      | 0      | 0      | 0      | 0      | 0      | 0      | 0      | 0      | 0      | 0      | 0      | 0      | 0      |
| Deferribacter      | 2              | 73             | 0      | 0      | 0      | 0      | 1      | 0      | 0      | 0      | 0      | 0      | 0      | 0      | 0      | 0      | 0      | 0      | 0      | 0      |
| Dehalobacter       | 1              | 9              | 0      | 0      | 0      | 0      | 0      | 0      | 0      | 0      | 0      | 0      | 0      | 0      | 0      | 0      | 0      | 0      | 0      | 0      |
| Dehalococcoides    | 2              | 41             | 0      | 0      | 0      | 0      | 0      | 0      | 0      | 0      | 0      | 0      | 0      | 0      | 0      | 0      | 0      | 0      | 0      | 0      |
| Dehalogenimonas    | 1              | 37             | 0      | 0      | 0      | 0      | 0      | 0      | 0      | 0      | 0      | 0      | 0      | 0      | 0      | 0      | 0      | 0      | 0      | 0      |
| Deinococcus        | 2              | 140            | 0      | 0      | 0      | 0      | 0      | 1      | 0      | 0      | 0      | 0      | 0      | 0      | 0      | 0      | 0      | 0      | 0      | 0      |
| Delftia            | 3              | 177            | 0      | 0      | 0      | 0      | 1      | 0      | 0      | 1      | 0      | 0      | 0      | 0      | 0      | 0      | 0      | 0      | 0      | 0      |
| Denitrovibrio      | 2              | 67             | 0      | 0      | 0      | 0      | 0      | 0      | 0      | 0      | 0      | 0      | 0      | 0      | 0      | 0      | 0      | 0      | 0      | 0      |
| Desulfarculus      | 2              | 92             | 0      | 0      | 0      | 0      | 0      | 0      | 0      | 0      | 0      | 0      | 0      | 0      | 0      | 0      | 0      | 0      | 0      | 0      |
| Desulfatibacillum  | 3              | 84             | 0      | 0      | 0      | 0      | 0      | 0      | 0      | 0      | 0      | 0      | 0      | 0      | 0      | 0      | 0      | 0      | 0      | 0      |
| Desulfitobacterium | 2              | 102            | 0      | 0      | 0      | 0      | 1      | 0      | 0      | 0      | 0      | 0      | 0      | 0      | 0      | 0      | 0      | 0      | 0      | 0      |
| Desulfobacca       | 2              | 65             | 0      | 0      | 0      | 0      | 1      | 0      | 0      | 0      | 0      | 0      | 0      | 0      | 0      | 0      | 0      | 0      | 0      | 0      |
| Desulfobacterium   | 2              | 113            | 0      | 0      | 0      | 0      | 0      | 0      | 0      | 0      | 0      | 0      | 0      | 0      | 0      | 0      | 0      | 0      | 0      | 0      |
| Desulfobacula      | 1              | 21             | 0      | 0      | 0      | 0      | 0      | 0      | 0      | 0      | 0      | 0      | 0      | 0      | 0      | 0      | 0      | 0      | 0      | 0      |
| Desulfobulbus      | 2              | 88             | 0      | 0      | 0      | 0      | 0      | 0      | 0      | 0      | 0      | 0      | 0      | 0      | 0      | 0      | 0      | 0      | 0      | 0      |
| Desulfocapsa       | 1              | 9              | 0      | 0      | 0      | 0      | 0      | 0      | 0      | 0      | 0      | 0      | 0      | 0      | 0      | 0      | 0      | 0      | 0      | 0      |
| Desulfococcus      | 2              | 80             | 0      | 0      | 0      | 0      | 0      | 0      | 0      | 0      | 0      | 0      | 0      | 0      | 0      | 0      | 0      | 0      | 0      | 0      |
| Desulfohalobium    | 2              | 52             | 0      | 0      | 0      | 0      | 0      | 0      | 0      | 0      | 0      | 0      | 0      | 0      | 0      | 0      | 0      | 0      | 0      | 0      |
| Desulfomicrobium   | 2              | 65             | 0      | 0      | 0      | 0      | 0      | 0      | 0      | 0      | 0      | 0      | 0      | 0      | 0      | 0      | 0      | 0      | 0      | 0      |
| Desulfomonile      | 1              | 25             | 0      | 0      | 0      | 0      | 1      | 0      | 0      | 0      | 0      | 0      | 0      | 0      | 0      | 0      | 0      | 0      | 0      | 0      |
| Desulforhabdus     | 1              | 2              | 0      | 0      | 0      | 0      | 0      | 0      | 0      | 0      | 0      | 0      | 0      | 0      | 0      | 0      | 0      | 0      | 0      | 0      |
| Desulfosporosinus  | 1              | 30             | 0      | 0      | 0      | 0      | 0      | 0      | 0      | 0      | 0      | 0      | 0      | 0      | 0      | 0      | 0      | 0      | 0      | 0      |
| Desulfotalea       | 2              | 66             | 0      | 0      | 0      | 0      | 0      | 0      | 0      | 0      | 0      | 0      | 0      | 0      | 0      | 0      | 0      | 0      | 0      | 0      |
| Desulfotomaculum   | 2              | 98             | 0      | 0      | 0      | 0      | 0      | 0      | 0      | 0      | 0      | 0      | 0      | 0      | 0      | 0      | 0      | 0      | 0      | 0      |
| Desulfovibrio      | 2              | 144            | 0      | 0      | 0      | 0      | 0      | 0      | 0      | 0      | 0      | 0      | 0      | 0      | 0      | 0      | 0      | 0      | 0      | 0      |
| Desulfurispirillum | 2              | 78             | 0      | 0      | 0      | 0      | 0      | 0      | 0      | 0      | 0      | 0      | 0      | 0      | 0      | 0      | 0      | 0      | 0      | 0      |
| Desulfurivibrio    | 2              | 71             | 0      | 0      | 0      | 0      | 0      | 0      | 0      | 0      | 0      | 0      | 0      | 0      | 0      | 0      | 0      | 0      | 0      | 0      |
| Desulfurobacterium | 2              | 53             | 0      | 0      | 0      | 0      | 0      | 0      | 0      | 0      | 0      | 0      | 0      | 0      | 0      | 0      | 0      | 0      | 0      | 0      |
| Desulfurococcus    | 1              | 11             | 0      | 0      | 0      | 0      | 1      | 0      | 0      | 0      | 0      | 0      | 0      | 0      | 0      | 0      | 0      | 0      | 0      | 0      |
| Diaphorobacter     | 1              | 16             | 0      | 0      | 0      | 0      | 0      | 0      | 0      | 0      | 0      | 0      | 0      | 0      | 0      | 0      | 0      | 0      | 0      | 0      |
| Dichelobacter      | 2              | 45             | 0      | 0      | 0      | 0      | 0      | 0      | 0      | 0      | 0      | 0      | 0      | 0      | 0      | 0      | 0      | 0      | 0      | 0      |
| Dickeya            | 2              | 155            | 0      | 0      | 0      | 0      | 0      | 0      | 0      | 0      | 0      | 0      | 0      | 0      | 0      | 0      | 0      | 0      | 0      | 0      |
| Dictyoglomus       | 2              | 62             | 0      | 0      | 0      | 0      | 1      | 0      | 0      | 0      | 0      | 0      | 0      | 0      | 0      | 0      | 0      | 0      | 0      | 0      |
| Dinoroseobacter    | 3              | 148            | 0      | 0      | 0      | 0      | 1      | 1      | 0      | 0      | 0      | 0      | 0      | 0      | 0      | 0      | 0      | 0      | 0      | 0      |
| Dokdonia           | 1              | 3              | 0      | 0      | 0      | 0      | 0      | 0      | 0      | 0      | 0      | 0      | 0      | 0      | 0      | 0      | 0      | 0      | 0      | 0      |
| Dorea              | 1              | 7              | 0      | 0      | 0      | 0      | 0      | 0      | 0      | 0      | 0      | 0      | 0      | 0      | 0      | 0      | 0      | 0      | 0      | 0      |
| Dyadobacter        | 2              | 83             | 0      | 0      | 0      | 0      | 0      | 1      | 0      | 0      | 0      | 0      | 0      | 0      | 0      | 0      | 0      | 0      | 0      | 0      |
| Echinicola         | 1              | 20             | 0      | 0      | 0      | 0      | 1      | 1      | 0      | 0      | 0      | 0      | 0      | 0      | 0      | 0      | 0      | 0      | 0      | 0      |
| Edwardsiella       | 2              | 126            | 0      | 0      | 0      | 0      | 0      | 0      | 0      | 0      | 0      | 0      | 0      | 0      | 0      | 0      | 0      | 0      | 0      | 0      |
| Eggerthella        | 1              | 51             | 0      | 0      | 0      | 0      | 0      | 0      | 0      | 0      | 0      | 0      | 0      | 0      | 0      | 0      | 0      | 0      | 0      | 0      |
| Ehrlichia          | 2              | 37             | 0      | 0      | 0      | 0      | 0      | 0      | 0      | 0      | 0      | 0      | 0      | 0      | 0      | 0      | 0      | 0      | 0      | 0      |
| Eikenella          | 1              | 4              | 0      | 0      | 0      | 0      | 0      | 0      | 0      | 0      | 0      | 0      | 0      | 0      | 0      | 0      | 0      | 0      | 0      | 0      |
| Elusimicrobium     | 2              | 44             | 0      | 0      | 0      | 0      | 0      | 0      | 0      | 0      | 0      | 0      | 0      | 0      | 0      | 0      | 0      | 0      | 0      | 0      |
| Emticicia          | 1              | 21             | 0      | 0      | 0      | 0      | 0      | 1      | 0      | 0      | 0      | 0      | 0      | 0      | 0      | 0      | 0      | 0      | 0      | 0      |
| Enhydrobacter      | 1              | 1              | 0      | 0      | 0      | 0      | 0      | 0      | 0      | 0      | 0      | 0      | 0      | 0      | 0      | 0      | 0      | 0      | 0      | 0      |
| Ensifer            | 1              | 2              | 0      | 0      | 0      | 0      | 0      | 0      | 0      | 0      | 0      | 0      | 0      | 0      | 0      | 0      | 0      | 0      | 0      | 0      |
| Enterobacter       | 2              | 202            | 0      | 0      | 0      | 0      | 1      | 1      | 0      | 0      | 0      | 0      | 0      | 0      | 0      | 0      | 0      | 0      | 0      | 0      |
| Enterobacteriaceae | 2              | 211            | 0      | 0      | 0      | 0      | 1      | 1      | 0      | 0      | 0      | 0      | 0      | 0      | 0      | 0      | 0      | 0      | 0      | 0      |
| Enterococcus       | 1              | 187            | 0      | 0      | 0      | 0      | 1      | 0      | 0      | 0      | 0      | 0      | 0      | 0      | 0      | 0      | 0      | 0      | 0      | 0      |

| Genus               | Cluster Number | Protein Counts | K11947 | K11948 | K11949 | K13421 | K13953 | K14519 | K14520 | K14579 | K14582 | K14583 | K14584 | K14746 | K14747 | K14748 | K14751 | K15054 | K15058 | K15060 |
|---------------------|----------------|----------------|--------|--------|--------|--------|--------|--------|--------|--------|--------|--------|--------|--------|--------|--------|--------|--------|--------|--------|
| Enterovibrio        | 1              | 15             | 0      | 0      | 0      | 0      | 0      | 0      | 0      | 0      | 0      | 0      | 0      | 0      | 0      | 0      | 0      | 0      | 0      | 0      |
| Erwinia             | 2              | 151            | 0      | 0      | 0      | 0      | 1      | 1      | 0      | 0      | 0      | 0      | 0      | 0      | 0      | 0      | 0      | 0      | 0      | 0      |
| Erysipelothrix      | 1              | 9              | 0      | 0      | 0      | 0      | 0      | 0      | 0      | 0      | 0      | 0      | 0      | 0      | 0      | 0      | 0      | 0      | 0      | 0      |
| Erysipelotrichaceae | 1              | 4              | 0      | 0      | 0      | 0      | 0      | 0      | 0      | 0      | 0      | 0      | 0      | 0      | 0      | 0      | 0      | 0      | 0      | 0      |
| Erythrobacter       | 2              | 80             | 0      | 0      | 0      | 0      | 0      | 0      | 0      | 0      | 0      | 0      | 0      | 0      | 0      | 0      | 0      | 0      | 0      | 0      |
| Escherichia         | 2              | 242            | 0      | 0      | 0      | 0      | 1      | 0      | 0      | 0      | 0      | 0      | 0      | 0      | 0      | 0      | 0      | 0      | 0      | 0      |
| Ethanoligenens      | 2              | 69             | 0      | 0      | 0      | 0      | 0      | 0      | 0      | 0      | 0      | 0      | 0      | 0      | 0      | 0      | 0      | 0      | 0      | 0      |
| Eubacteriaceae      | 1              | 2              | 0      | 0      | 0      | 0      | 0      | 0      | 0      | 0      | 0      | 0      | 0      | 0      | 0      | 0      | 0      | 0      | 0      | 0      |
| Eubacterium         | 2              | 103            | 0      | 0      | 0      | 0      | 0      | 0      | 0      | 0      | 0      | 0      | 0      | 0      | 0      | 0      | 0      | 0      | 0      | 0      |
| Eudoraea            | 1              | 4              | 0      | 0      | 0      | 0      | 0      | 0      | 0      | 0      | 0      | 0      | 0      | 0      | 0      | 0      | 0      | 0      | 0      | 0      |
| Euryarchaeota       | 1              | 1              | 0      | 0      | 0      | 0      | 0      | 0      | 0      | 0      | 0      | 0      | 0      | 0      | 0      | 0      | 0      | 0      | 0      | 0      |
| Exiguobacterium     | 2              | 93             | 0      | 0      | 0      | 0      | 1      | 0      | 0      | 0      | 0      | 0      | 0      | 0      | 0      | 0      | 0      | 0      | 0      | 0      |
| Faecalibacterium    | 1              | 12             | 0      | 0      | 0      | 0      | 0      | 0      | 0      | 0      | 0      | 0      | 0      | 0      | 0      | 0      | 0      | 0      | 0      | 0      |
| Ferrimonas          | 2              | 115            | 0      | 0      | 0      | 0      | 0      | 1      | 0      | 0      | 0      | 0      | 0      | 0      | 0      | 0      | 0      | 0      | 0      | 0      |
| Ferroglobus         | 1              | 14             | 0      | 0      | 0      | 0      | 0      | 0      | 0      | 0      | 0      | 0      | 0      | 0      | 0      | 0      | 0      | 0      | 0      | 0      |
| Ferroplasma         | 1              | 11             | 0      | 0      | 0      | 0      | 0      | 0      | 0      | 0      | 0      | 0      | 0      | 0      | 0      | 0      | 0      | 0      | 0      | 0      |
| Fervidicoccus       | 1              | 7              | 0      | 0      | 0      | 0      | 0      | 0      | 0      | 0      | 0      | 0      | 0      | 0      | 0      | 0      | 0      | 0      | 0      | 0      |
| Fervidobacterium    | 2              | 54             | 0      | 0      | 0      | 0      | 0      | 0      | 0      | 0      | 0      | 0      | 0      | 0      | 0      | 0      | 0      | 0      | 0      | 0      |
| Fibrella            | 1              | 17             | 0      | 0      | 0      | 0      | 0      | 1      | 0      | 0      | 0      | 0      | 0      | 0      | 0      | 0      | 0      | 0      | 0      | 0      |
| Fibrobacter         | 2              | 52             | 0      | 0      | 0      | 0      | 0      | 0      | 0      | 0      | 0      | 0      | 0      | 0      | 0      | 0      | 0      | 0      | 0      | 0      |
| Filifactor          | 1              | 9              | 0      | 0      | 0      | 0      | 0      | 0      | 0      | 0      | 0      | 0      | 0      | 0      | 0      | 0      | 0      | 0      | 0      | 0      |
| Finegoldia          | 2              | 55             | 0      | 0      | 0      | 0      | 0      | 0      | 0      | 0      | 0      | 0      | 0      | 0      | 0      | 0      | 0      | 0      | 0      | 0      |
| Firmicutes          | 1              | 15             | 0      | 0      | 0      | 0      | 0      | 0      | 0      | 0      | 0      | 0      | 0      | 0      | 0      | 0      | 0      | 0      | 0      | 0      |
| Fischerella         | 1              | 15             | 0      | 0      | 0      | 0      | 0      | 0      | 0      | 0      | 0      | 0      | 0      | 0      | 0      | 0      | 0      | 0      | 0      | 0      |
| Flavobacteria       | 1              | 7              | 0      | 0      | 0      | 0      | 0      | 0      | 0      | 0      | 0      | 0      | 0      | 0      | 0      | 0      | 0      | 0      | 0      | 0      |
| Flavobacteriaceae   | 2              | 69             | 0      | 0      | 0      | 1      | 0      | 0      | 0      | 0      | 0      | 0      | 0      | 0      | 0      | 0      | 0      | 0      | 0      | 0      |
| Flavobacteriales    | 1              | 3              | 0      | 0      | 0      | 0      | 0      | 0      | 0      | 0      | 0      | 0      | 0      | 0      | 0      | 0      | 0      | 0      | 0      | 0      |
| Flavobacterium      | 2              | 103            | 0      | 0      | 0      | 0      | 1      | 1      | 0      | 0      | 0      | 0      | 0      | 0      | 0      | 0      | 0      | 0      | 0      | 0      |
| Flexibacter         | 1              | 17             | 0      | 0      | 0      | 0      | 0      | 0      | 0      | 0      | 0      | 0      | 0      | 0      | 0      | 0      | 0      | 0      | 0      | 0      |
| Flexistipes         | 1              | 11             | 0      | 0      | 0      | 0      | 1      | 0      | 0      | 0      | 0      | 0      | 0      | 0      | 0      | 0      | 0      | 0      | 0      | 0      |
| Fluoribacter        | 1              | 6              | 0      | 0      | 0      | 0      | 0      | 0      | 0      | 0      | 0      | 0      | 0      | 0      | 0      | 0      | 0      | 0      | 0      | 0      |
| Fluviicola          | 2              | 69             | 0      | 0      | 0      | 0      | 0      | 1      | 0      | 0      | 0      | 0      | 0      | 0      | 0      | 0      | 0      | 0      | 0      | 0      |
| Formosa             | 1              | 2              | 0      | 0      | 0      | 0      | 0      | 0      | 0      | 0      | 0      | 0      | 0      | 0      | 0      | 0      | 0      | 0      | 0      | 0      |
| Francisella         | 2              | 88             | 0      | 0      | 0      | 0      | 0      | 0      | 0      | 0      | 0      | 0      | 0      | 0      | 0      | 0      | 0      | 0      | 0      | 0      |
| Frankia             | 3              | 202            | 0      | 0      | 0      | 0      | 1      | 1      | 1      | 0      | 0      | 0      | 0      | 0      | 0      | 0      | 0      | 0      | 0      | 0      |
| Frateuria           | 1              | 25             | 0      | 0      | 0      | 0      | 1      | 1      | 0      | 0      | 0      | 0      | 0      | 0      | 0      | 0      | 0      | 0      | 0      | 0      |
| Fructobacillus      | 1              | 2              | 0      | 0      | 0      | 0      | 0      | 0      | 0      | 0      | 0      | 0      | 0      | 0      | 0      | 0      | 0      | 0      | 0      | 0      |
| Fulvimarina         | 1              | 2              | 0      | 0      | 0      | 0      | 0      | 0      | 0      | 0      | 0      | 0      | 0      | 0      | 0      | 0      | 0      | 0      | 0      | 0      |
| Fusobacterium       | 1              | 48             | 0      | 0      | 0      | 0      | 0      | 0      | 0      | 0      | 0      | 0      | 0      | 0      | 0      | 0      | 0      | 0      | 0      | 0      |
| Gallibacterium      | 2              | 87             | 0      | 0      | 0      | 0      | 0      | 0      | 0      | 0      | 0      | 0      | 0      | 0      | 0      | 0      | 0      | 0      | 0      | 0      |
| Gallionella         | 2              | 67             | 0      | 0      | 0      | 0      | 0      | 0      | 0      | 0      | 0      | 0      | 0      | 0      | 0      | 0      | 0      | 0      | 0      | 0      |
| Gammaproteobacteria | 1              | 9              | 0      | 0      | 0      | 0      | 0      | 0      | 0      | 0      | 0      | 0      | 0      | 0      | 0      | 0      | 0      | 0      | 0      | 0      |
| Gardnerella         | 1              | 31             | 0      | 0      | 0      | 0      | 1      | 0      | 0      | 0      | 0      | 0      | 0      | 0      | 0      | 0      | 0      | 0      | 0      | 0      |
| Geitlerinema        | 1              | 9              | 0      | 0      | 0      | 0      | 0      | 0      | 0      | 0      | 0      | 0      | 0      | 0      | 0      | 0      | 0      | 0      | 0      | 0      |
| Gemmatimonas        | 2              | 93             | 0      | 0      | 0      | 0      | 1      | 0      | 0      | 0      | 0      | 0      | 0      | 0      | 0      | 0      | 0      | 0      | 0      | 0      |
| Geobacillus         | 2              | 168            | 0      | 0      | 0      | 0      | 1      | 0      | 0      | 0      | 0      | 0      | 0      | 0      | 0      | 0      | 0      | 0      | 0      | 0      |
| Geobacter           | 2              | 150            | 0      | 0      | 0      | 0      | 1      | 0      | 0      | 0      | 0      | 0      | 0      | 0      | 0      | 0      | 0      | 0      | 0      | 0      |
| Geodermatophilus    | 2              | 136            | 0      | 0      | 0      | 0      | 1      | 1      | 0      | 0      | 0      | 0      | 0      | 0      | 0      | 0      | 0      | 0      | 0      | 0      |
| Geopsychrobacter    | 1              | 2              | 0      | 0      | 0      | 0      | 0      | 0      | 0      | 0      | 0      | 0      | 0      | 0      | 0      | 0      | 0      | 0      | 0      | 0      |
| Gillisia            | 1              | 11             | 0      | 0      | 0      | 0      | 0      | 0      | 0      | 0      | 0      | 0      | 0      | 0      | 0      | 0      | 0      | 0      | 0      | 0      |
| Gilvimarinus        | 1              | 4              | 0      | 0      | 0      | 0      | 0      | 0      | 0      | 0      | 0      | 0      | 0      | 0      | 0      | 0      | 0      | 0      | 0      | 0      |
| Glaciecola          | 2              | 117            | 0      | 0      | 0      | 0      | 0      | 0      | 1      | 0      | 0      | 0      | 0      | 0      | 0      | 0      | 0      | 0      | 0      | 0      |

| Genus             | Cluster Number | Protein Counts | K11947 | K11948 | K11949 | K13421 | K13953 | K14519 | K14520 | K14579 | K14582 | K14583 | K14584 | K14746 | K14747 | K14748 | K14751 | K15054 | K15058 | K15060 |
|-------------------|----------------|----------------|--------|--------|--------|--------|--------|--------|--------|--------|--------|--------|--------|--------|--------|--------|--------|--------|--------|--------|
| Gloeobacter       | 2              | 67             | 0      | 0      | 0      | 1      | 0      | 0      | 0      | 0      | 0      | 0      | 0      | 0      | 0      | 0      | 0      | 0      | 0      | 0      |
| Gloeocapsa        | 1              | 20             | 0      | 0      | 0      | 1      | 1      | 0      | 0      | 0      | 0      | 0      | 0      | 0      | 0      | 0      | 0      | 0      | 0      | 0      |
| Gloeotheca        | 1              | 1              | 0      | 0      | 0      | 0      | 0      | 0      | 0      | 0      | 0      | 0      | 0      | 0      | 0      | 0      | 0      | 0      | 0      | 0      |
| Gluconacetobacter | 2              | 96             | 0      | 0      | 0      | 0      | 1      | 0      | 0      | 0      | 0      | 0      | 0      | 0      | 0      | 0      | 0      | 0      | 0      | 0      |
| Gluconobacter     | 2              | 76             | 0      | 0      | 0      | 0      | 1      | 0      | 0      | 0      | 0      | 0      | 0      | 0      | 0      | 0      | 0      | 0      | 0      | 0      |
| Gordonia          | 1              | 158            | 0      | 0      | 0      | 0      | 1      | 1      | 1      | 0      | 0      | 0      | 0      | 0      | 0      | 0      | 0      | 0      | 0      | 0      |
| Gordonibacter     | 1              | 32             | 0      | 0      | 0      | 0      | 0      | 0      | 0      | 0      | 0      | 0      | 0      | 0      | 0      | 0      | 0      | 0      | 0      | 0      |
| Gramella          | 2              | 104            | 0      | 0      | 0      | 0      | 1      | 0      | 0      | 0      | 0      | 0      | 0      | 0      | 0      | 0      | 0      | 0      | 0      | 0      |
| Granulibacter     | 2              | 90             | 0      | 0      | 0      | 0      | 0      | 0      | 0      | 0      | 0      | 0      | 0      | 0      | 0      | 0      | 0      | 0      | 0      | 0      |
| Granulicella      | 2              | 98             | 0      | 0      | 0      | 0      | 1      | 1      | 0      | 0      | 0      | 0      | 0      | 0      | 0      | 0      | 0      | 0      | 0      | 0      |
| Grimontia         | 1              | 9              | 0      | 0      | 0      | 0      | 0      | 0      | 0      | 0      | 0      | 0      | 0      | 0      | 0      | 0      | 0      | 0      | 0      | 0      |
| Haemophilus       | 2              | 117            | 0      | 0      | 0      | 0      | 0      | 0      | 0      | 0      | 0      | 0      | 0      | 0      | 0      | 0      | 0      | 0      | 0      | 0      |
| Hafnia            | 1              | 29             | 0      | 0      | 0      | 0      | 0      | 0      | 0      | 0      | 0      | 0      | 0      | 0      | 0      | 0      | 0      | 0      | 0      | 0      |
| Hahella           | 3              | 130            | 0      | 0      | 0      | 0      | 0      | 0      | 0      | 0      | 0      | 0      | 0      | 0      | 0      | 0      | 0      | 0      | 0      | 0      |
| Halalkalicoccus   | 1              | 18             | 0      | 0      | 0      | 0      | 1      | 0      | 0      | 0      | 0      | 0      | 0      | 0      | 0      | 0      | 0      | 0      | 0      | 0      |
| Halanaerobium     | 2              | 89             | 0      | 0      | 0      | 0      | 0      | 0      | 0      | 0      | 0      | 0      | 0      | 0      | 0      | 0      | 0      | 0      | 0      | 0      |
| Haliangium        | 2              | 108            | 0      | 0      | 0      | 0      | 0      | 0      | 0      | 0      | 0      | 0      | 0      | 0      | 0      | 0      | 0      | 0      | 0      | 0      |
| Haliscomenobacter | 2              | 107            | 0      | 0      | 0      | 0      | 0      | 1      | 0      | 0      | 0      | 0      | 0      | 0      | 0      | 0      | 0      | 0      | 0      | 0      |
| Haloarcula        | 1              | 22             | 0      | 0      | 0      | 0      | 1      | 0      | 0      | 0      | 0      | 0      | 0      | 0      | 0      | 0      | 0      | 0      | 0      | 0      |
| Halobacillus      | 1              | 19             | 0      | 0      | 0      | 0      | 1      | 0      | 0      | 0      | 0      | 0      | 0      | 0      | 0      | 0      | 0      | 0      | 0      | 0      |
| Halobacteriaceae  | 1              | 1              | 0      | 0      | 0      | 0      | 0      | 0      | 0      | 0      | 0      | 0      | 0      | 0      | 0      | 0      | 0      | 0      | 0      | 0      |
| Halobacterium     | 1              | 10             | 0      | 0      | 0      | 0      | 0      | 0      | 0      | 0      | 0      | 0      | 0      | 0      | 0      | 0      | 0      | 0      | 0      | 0      |
| Halobacteroides   | 1              | 14             | 0      | 0      | 0      | 0      | 0      | 0      | 0      | 0      | 0      | 0      | 0      | 0      | 0      | 0      | 0      | 0      | 0      | 0      |
| Haloferax         | 1              | 20             | 0      | 0      | 0      | 0      | 0      | 0      | 0      | 0      | 0      | 0      | 0      | 0      | 0      | 0      | 0      | 0      | 0      | 0      |
| Halogeometricum   | 1              | 12             | 0      | 0      | 0      | 0      | 0      | 0      | 0      | 0      | 0      | 0      | 0      | 0      | 0      | 0      | 0      | 0      | 0      | 0      |
| Halomicrobium     | 1              | 10             | 0      | 0      | 0      | 0      | 0      | 0      | 0      | 0      | 0      | 0      | 0      | 0      | 0      | 0      | 0      | 0      | 0      | 0      |
| Halomonas         | 1              | 149            | 0      | 0      | 0      | 0      | 1      | 1      | 0      | 0      | 0      | 0      | 0      | 0      | 0      | 0      | 0      | 1      | 0      | 0      |
| Halopiger         | 1              | 16             | 0      | 0      | 0      | 0      | 1      | 0      | 0      | 0      | 0      | 0      | 0      | 0      | 0      | 0      | 0      | 0      | 0      | 0      |
| Haloquadratum     | 1              | 19             | 0      | 0      | 0      | 0      | 1      | 0      | 0      | 0      | 0      | 0      | 0      | 0      | 0      | 0      | 0      | 0      | 0      | 0      |
| Halorhabdus       | 1              | 10             | 0      | 0      | 0      | 0      | 0      | 0      | 0      | 0      | 0      | 0      | 0      | 0      | 0      | 0      | 0      | 0      | 0      | 0      |
| Halorhodospira    | 2              | 71             | 0      | 0      | 0      | 0      | 0      | 0      | 0      | 0      | 0      | 0      | 0      | 0      | 0      | 0      | 0      | 0      | 0      | 0      |
| Halorubrum        | 1              | 16             | 0      | 0      | 0      | 0      | 1      | 0      | 0      | 0      | 0      | 0      | 0      | 0      | 0      | 0      | 0      | 0      | 0      | 0      |
| Haloterrigena     | 1              | 19             | 0      | 0      | 0      | 0      | 1      | 0      | 0      | 0      | 0      | 0      | 0      | 0      | 0      | 0      | 0      | 0      | 0      | 0      |
| Halothece         | 1              | 9              | 0      | 0      | 0      | 1      | 1      | 0      | 0      | 0      | 0      | 0      | 0      | 0      | 0      | 0      | 0      | 0      | 0      | 0      |
| Halothermothrix   | 2              | 50             | 0      | 0      | 0      | 0      | 0      | 0      | 0      | 0      | 0      | 0      | 0      | 0      | 0      | 0      | 0      | 0      | 0      | 0      |
| Halothiobacillus  | 2              | 65             | 0      | 0      | 0      | 0      | 0      | 0      | 0      | 0      | 0      | 0      | 0      | 0      | 0      | 0      | 0      | 0      | 0      | 0      |
| Halovivax         | 1              | 12             | 0      | 0      | 0      | 0      | 0      | 0      | 0      | 0      | 0      | 0      | 0      | 0      | 0      | 0      | 0      | 0      | 0      | 0      |
| Helicobacter      | 2              | 79             | 0      | 0      | 0      | 0      | 0      | 0      | 0      | 0      | 0      | 0      | 0      | 0      | 0      | 0      | 0      | 0      | 0      | 0      |
| Heliobacillus     | 1              | 4              | 0      | 0      | 0      | 0      | 0      | 0      | 0      | 0      | 0      | 0      | 0      | 0      | 0      | 0      | 0      | 0      | 0      | 0      |
| Heliobacterium    | 2              | 51             | 0      | 0      | 0      | 0      | 0      | 0      | 0      | 0      | 0      | 0      | 0      | 0      | 0      | 0      | 0      | 0      | 0      | 0      |
| Herbaspirillum    | 2              | 172            | 0      | 0      | 0      | 0      | 1      | 1      | 0      | 0      | 0      | 0      | 0      | 0      | 0      | 0      | 0      | 1      | 0      | 0      |
| Herminiimonas     | 3              | 89             | 0      | 0      | 0      | 0      | 1      | 0      | 0      | 0      | 0      | 0      | 0      | 0      | 0      | 0      | 0      | 0      | 0      | 0      |
| Herpetosiphon     | 3              | 90             | 0      | 0      | 0      | 0      | 0      | 1      | 0      | 0      | 0      | 0      | 0      | 0      | 0      | 0      | 0      | 0      | 0      | 0      |
| Hippea            | 2              | 44             | 0      | 0      | 0      | 0      | 0      | 0      | 0      | 0      | 0      | 0      | 0      | 0      | 0      | 0      | 0      | 0      | 0      | 0      |
| Hirschia          | 2              | 102            | 0      | 0      | 0      | 0      | 0      | 1      | 0      | 0      | 0      | 0      | 0      | 0      | 0      | 0      | 0      | 0      | 0      | 0      |
| Histophilus       | 2              | 72             | 0      | 0      | 0      | 0      | 0      | 0      | 0      | 0      | 0      | 0      | 0      | 0      | 0      | 0      | 0      | 0      | 0      | 0      |
| Hoeflea           | 1              | 16             | 0      | 0      | 0      | 0      | 0      | 0      | 0      | 0      | 0      | 0      | 0      | 0      | 0      | 0      | 0      | 0      | 0      | 0      |
| Hydrogenivirga    | 1              | 2              | 0      | 0      | 0      | 0      | 0      | 0      | 0      | 0      | 0      | 0      | 0      | 0      | 0      | 0      | 0      | 0      | 0      | 0      |
| Hydrogenobacter   | 2              | 55             | 0      | 0      | 0      | 0      | 0      | 0      | 0      | 0      | 0      | 0      | 0      | 0      | 0      | 0      | 0      | 0      | 0      | 0      |
| Hydrogenobaculum  | 2              | 44             | 0      | 0      | 0      | 0      | 1      | 0      | 0      | 0      | 0      | 0      | 0      | 0      | 0      | 0      | 0      | 0      | 0      | 0      |
| Hydrogenophaga    | 1              | 9              | 0      | 0      | 0      | 0      | 0      | 0      | 0      | 0      | 0      | 0      | 0      | 0      | 0      | 0      | 0      | 0      | 0      | 0      |
| Hylemonella       | 1              | 4              | 0      | 0      | 0      | 0      | 0      | 0      | 0      | 0      | 0      | 0      | 0      | 0      | 0      | 0      | 0      | 0      | 0      | 0      |



| Genus                 | Cluster Number | Protein Counts | K11947 | K11948 | K11949 | K13421 | K13953 | K14519 | K14520 | K14579 | K14582 | K14583 | K14584 | K14746 | K14747 | K14748 | K14751 | K15054 | K15058 | K15060 |
|-----------------------|----------------|----------------|--------|--------|--------|--------|--------|--------|--------|--------|--------|--------|--------|--------|--------|--------|--------|--------|--------|--------|
| Hyperthermus          | 1              | 6              | 0      | 0      | 0      | 0      | 0      | 0      | 0      | 0      | 0      | 0      | 0      | 0      | 0      | 0      | 0      | 0      | 0      | 0      |
| Hyphomicrobium        | 2              | 93             | 0      | 0      | 0      | 0      | 1      | 0      | 0      | 0      | 0      | 0      | 0      | 0      | 0      | 0      | 0      | 0      | 0      | 0      |
| Hyphomonas            | 3              | 105            | 0      | 0      | 0      | 0      | 0      | 0      | 0      | 0      | 0      | 0      | 0      | 0      | 0      | 0      | 0      | 0      | 0      | 0      |
| Ideonella             | 1              | 18             | 0      | 0      | 0      | 0      | 0      | 0      | 0      | 0      | 0      | 0      | 0      | 0      | 0      | 0      | 0      | 0      | 0      | 0      |
| Idiomarina            | 2              | 86             | 0      | 0      | 0      | 0      | 0      | 0      | 0      | 0      | 0      | 0      | 0      | 0      | 0      | 0      | 0      | 0      | 0      | 0      |
| Ignavibacterium       | 1              | 14             | 0      | 0      | 0      | 0      | 0      | 0      | 0      | 0      | 0      | 0      | 0      | 0      | 0      | 0      | 0      | 0      | 0      | 0      |
| Ignicoccus            | 1              | 5              | 0      | 0      | 0      | 0      | 0      | 0      | 0      | 0      | 0      | 0      | 0      | 0      | 0      | 0      | 0      | 0      | 0      | 0      |
| Ignisphaera           | 1              | 8              | 0      | 0      | 0      | 0      | 1      | 0      | 0      | 0      | 0      | 0      | 0      | 0      | 0      | 0      | 0      | 0      | 0      | 0      |
| Ilyobacter            | 2              | 85             | 0      | 0      | 0      | 0      | 0      | 0      | 0      | 0      | 0      | 0      | 0      | 0      | 0      | 0      | 0      | 0      | 0      | 0      |
| Intrasporangium       | 2              | 114            | 0      | 0      | 0      | 0      | 1      | 1      | 0      | 0      | 0      | 0      | 0      | 0      | 0      | 0      | 0      | 0      | 0      | 0      |
| Isoptricola           | 1              | 18             | 0      | 0      | 0      | 0      | 0      | 0      | 0      | 0      | 0      | 0      | 0      | 0      | 0      | 0      | 0      | 0      | 0      | 0      |
| Isosphaera            | 2              | 75             | 0      | 0      | 0      | 0      | 1      | 0      | 0      | 0      | 0      | 0      | 0      | 0      | 0      | 0      | 0      | 0      | 0      | 0      |
| Jannaschia            | 3              | 151            | 0      | 0      | 0      | 0      | 0      | 0      | 0      | 0      | 0      | 0      | 0      | 0      | 0      | 0      | 0      | 0      | 0      | 0      |
| Janthinobacterium     | 2              | 99             | 0      | 0      | 0      | 0      | 0      | 0      | 0      | 0      | 0      | 0      | 0      | 0      | 0      | 0      | 0      | 0      | 0      | 0      |
| Jonesia               | 2              | 56             | 0      | 0      | 0      | 0      | 0      | 0      | 0      | 0      | 0      | 0      | 0      | 0      | 0      | 0      | 0      | 0      | 0      | 0      |
| Joostella             | 1              | 3              | 0      | 0      | 0      | 0      | 0      | 0      | 0      | 0      | 0      | 0      | 0      | 0      | 0      | 0      | 0      | 0      | 0      | 0      |
| Kaistia               | 1              | 2              | 0      | 0      | 0      | 0      | 0      | 0      | 0      | 0      | 0      | 0      | 0      | 0      | 0      | 0      | 0      | 0      | 0      | 0      |
| Kangiella             | 2              | 84             | 0      | 0      | 0      | 0      | 0      | 0      | 0      | 0      | 0      | 0      | 0      | 0      | 0      | 0      | 0      | 0      | 0      | 0      |
| Ketogulonicigenium    | 2              | 102            | 0      | 0      | 0      | 0      | 0      | 1      | 0      | 0      | 0      | 0      | 0      | 0      | 0      | 0      | 0      | 0      | 0      | 0      |
| Kineococcus           | 1              | 24             | 0      | 0      | 0      | 0      | 1      | 0      | 0      | 0      | 0      | 0      | 0      | 0      | 0      | 0      | 0      | 0      | 0      | 0      |
| Kinetoplastibacterium | 1              | 2              | 0      | 0      | 0      | 0      | 0      | 0      | 0      | 0      | 0      | 0      | 0      | 0      | 0      | 0      | 0      | 0      | 0      | 0      |
| Kingella              | 1              | 4              | 0      | 0      | 0      | 0      | 0      | 0      | 0      | 0      | 0      | 0      | 0      | 0      | 0      | 0      | 0      | 0      | 0      | 0      |
| Kitasatospora         | 1              | 36             | 0      | 0      | 0      | 0      | 1      | 0      | 0      | 0      | 0      | 0      | 0      | 0      | 0      | 0      | 0      | 0      | 0      | 0      |
| Klebsiella            | 3              | 222            | 0      | 0      | 0      | 0      | 1      | 1      | 0      | 0      | 0      | 0      | 0      | 0      | 0      | 0      | 0      | 0      | 0      | 0      |
| Kluyvera              | 1              | 1              | 0      | 0      | 0      | 0      | 0      | 0      | 0      | 0      | 0      | 0      | 0      | 0      | 0      | 0      | 0      | 0      | 0      | 0      |
| Kocuria               | 2              | 87             | 0      | 0      | 0      | 0      | 1      | 0      | 0      | 0      | 0      | 0      | 0      | 0      | 0      | 0      | 0      | 0      | 0      | 0      |
| Kordia                | 1              | 5              | 0      | 0      | 0      | 0      | 0      | 0      | 0      | 0      | 0      | 0      | 0      | 0      | 0      | 0      | 0      | 0      | 0      | 0      |
| Kosmotoga             | 2              | 61             | 0      | 0      | 0      | 0      | 0      | 0      | 0      | 0      | 0      | 0      | 0      | 0      | 0      | 0      | 0      | 0      | 0      | 0      |
| Kribbella             | 2              | 99             | 0      | 0      | 0      | 0      | 0      | 1      | 0      | 0      | 0      | 0      | 0      | 0      | 0      | 0      | 0      | 0      | 0      | 0      |
| Krokinobacter         | 2              | 90             | 0      | 0      | 0      | 0      | 0      | 1      | 0      | 0      | 0      | 0      | 0      | 0      | 0      | 0      | 0      | 0      | 0      | 0      |
| Kyrpidia              | 2              | 113            | 0      | 0      | 0      | 0      | 1      | 0      | 0      | 0      | 0      | 0      | 0      | 0      | 0      | 0      | 0      | 0      | 0      | 0      |
| Kytococcus            | 2              | 70             | 0      | 0      | 0      | 0      | 0      | 0      | 0      | 0      | 0      | 0      | 0      | 0      | 0      | 0      | 0      | 0      | 0      | 0      |
| Labrenzia             | 1              | 4              | 0      | 0      | 0      | 0      | 0      | 0      | 0      | 0      | 0      | 0      | 0      | 0      | 0      | 0      | 0      | 0      | 0      | 0      |
| Lachnoanaerobaculum   | 1              | 1              | 0      | 0      | 0      | 0      | 0      | 0      | 0      | 0      | 0      | 0      | 0      | 0      | 0      | 0      | 0      | 0      | 0      | 0      |
| Lachnospiraceae       | 1              | 51             | 0      | 0      | 0      | 0      | 0      | 0      | 0      | 0      | 0      | 0      | 0      | 0      | 0      | 0      | 0      | 0      | 0      | 0      |
| Lacinutrix            | 1              | 20             | 0      | 0      | 0      | 0      | 0      | 0      | 0      | 0      | 0      | 0      | 0      | 0      | 0      | 0      | 0      | 0      | 0      | 0      |
| Lactobacillus         | 2              | 119            | 0      | 0      | 0      | 0      | 1      | 0      | 0      | 0      | 0      | 0      | 0      | 0      | 0      | 0      | 0      | 0      | 0      | 0      |
| Lactococcus           | 2              | 82             | 0      | 0      | 0      | 0      | 1      | 0      | 0      | 0      | 0      | 0      | 0      | 0      | 0      | 0      | 0      | 0      | 0      | 0      |
| Lamprocystis          | 1              | 2              | 0      | 0      | 0      | 0      | 0      | 0      | 0      | 0      | 0      | 0      | 0      | 0      | 0      | 0      | 0      | 0      | 0      | 0      |
| Laribacter            | 2              | 80             | 0      | 0      | 0      | 0      | 0      | 0      | 0      | 0      | 0      | 0      | 0      | 0      | 0      | 0      | 0      | 0      | 0      | 0      |
| Lawsonia              | 2              | 33             | 0      | 0      | 0      | 0      | 0      | 0      | 0      | 0      | 0      | 0      | 0      | 0      | 0      | 0      | 0      | 0      | 0      | 0      |
| Leadbetterella        | 2              | 79             | 0      | 0      | 0      | 0      | 0      | 1      | 0      | 0      | 0      | 0      | 0      | 0      | 0      | 0      | 0      | 0      | 0      | 0      |
| Leeuwenhoekiiella     | 1              | 2              | 0      | 0      | 0      | 0      | 0      | 0      | 0      | 0      | 0      | 0      | 0      | 0      | 0      | 0      | 0      | 0      | 0      | 0      |
| Legionella            | 2              | 117            | 0      | 0      | 0      | 0      | 1      | 0      | 0      | 0      | 0      | 0      | 0      | 0      | 0      | 0      | 0      | 0      | 0      | 0      |
| Leifsonia             | 2              | 48             | 0      | 0      | 0      | 0      | 1      | 0      | 0      | 0      | 0      | 0      | 0      | 0      | 0      | 0      | 0      | 0      | 0      | 0      |
| Leptolyngbya          | 1              | 10             | 0      | 0      | 0      | 1      | 0      | 0      | 0      | 0      | 0      | 0      | 0      | 0      | 0      | 0      | 0      | 0      | 0      | 0      |
| Leptospira            | 2              | 76             | 0      | 0      | 0      | 0      | 1      | 0      | 0      | 0      | 0      | 0      | 0      | 0      | 0      | 0      | 0      | 0      | 0      | 0      |
| Leptospirillum        | 1              | 10             | 0      | 0      | 0      | 0      | 1      | 0      | 0      | 0      | 0      | 0      | 0      | 0      | 0      | 0      | 0      | 0      | 0      | 0      |
| Leptothrix            | 3              | 186            | 0      | 0      | 0      | 0      | 0      | 1      | 0      | 0      | 0      | 0      | 0      | 0      | 0      | 0      | 0      | 0      | 0      | 0      |
| Leptotrichia          | 2              | 43             | 0      | 0      | 0      | 0      | 1      | 0      | 0      | 0      | 0      | 0      | 0      | 0      | 0      | 0      | 0      | 0      | 0      | 0      |
| Leucobacter           | 1              | 2              | 0      | 0      | 0      | 0      | 0      | 0      | 0      | 0      | 0      | 0      | 0      | 0      | 0      | 0      | 0      | 0      | 0      | 0      |
| Leuconostoc           | 2              | 64             | 0      | 0      | 0      | 0      | 1      | 0      | 0      | 0      | 0      | 0      | 0      | 0      | 0      | 0      | 0      | 0      | 0      | 0      |

| Genus                | Cluster Number | Protein Counts | K11947 | K11948 | K11949 | K13421 | K13953 | K14519 | K14520 | K14579 | K14582 | K14583 | K14584 | K14746 | K14747 | K14748 | K14751 | K15054 | K15058 | K15060 |
|----------------------|----------------|----------------|--------|--------|--------|--------|--------|--------|--------|--------|--------|--------|--------|--------|--------|--------|--------|--------|--------|--------|
| Liberibacter         | 1              | 4              | 0      | 0      | 0      | 0      | 0      | 0      | 0      | 0      | 0      | 0      | 0      | 0      | 0      | 0      | 0      | 0      | 0      | 0      |
| Limnohabitans        | 1              | 11             | 0      | 0      | 0      | 0      | 0      | 0      | 0      | 0      | 0      | 0      | 0      | 0      | 0      | 0      | 0      | 0      | 0      | 0      |
| Listeria             | 2              | 77             | 0      | 0      | 0      | 0      | 0      | 0      | 0      | 0      | 0      | 0      | 0      | 0      | 0      | 0      | 0      | 0      | 0      | 0      |
| Listeriaceae         | 1              | 6              | 0      | 0      | 0      | 0      | 0      | 0      | 0      | 0      | 0      | 0      | 0      | 0      | 0      | 0      | 0      | 0      | 0      | 0      |
| Listonella           | 1              | 38             | 0      | 0      | 0      | 0      | 0      | 0      | 0      | 0      | 0      | 0      | 0      | 0      | 0      | 0      | 0      | 0      | 0      | 0      |
| Loktanella           | 1              | 3              | 0      | 0      | 0      | 0      | 0      | 0      | 0      | 0      | 0      | 0      | 0      | 0      | 0      | 0      | 0      | 0      | 0      | 0      |
| Lysinibacillus       | 2              | 97             | 0      | 0      | 0      | 0      | 0      | 0      | 0      | 0      | 0      | 0      | 0      | 0      | 0      | 0      | 0      | 0      | 0      | 0      |
| Macrococcus          | 2              | 60             | 0      | 0      | 0      | 0      | 0      | 0      | 0      | 0      | 0      | 0      | 0      | 0      | 0      | 0      | 0      | 0      | 0      | 0      |
| Magnetococcus        | 2              | 64             | 0      | 0      | 0      | 0      | 0      | 0      | 0      | 0      | 0      | 0      | 0      | 0      | 0      | 0      | 0      | 0      | 0      | 0      |
| Magnetospirillum     | 2              | 113            | 0      | 0      | 0      | 0      | 0      | 0      | 0      | 0      | 0      | 0      | 0      | 0      | 0      | 0      | 0      | 0      | 0      | 0      |
| Mahella              | 2              | 58             | 0      | 0      | 0      | 0      | 0      | 0      | 0      | 0      | 0      | 0      | 0      | 0      | 0      | 0      | 0      | 0      | 0      | 0      |
| Mannheimia           | 2              | 85             | 0      | 0      | 0      | 0      | 0      | 0      | 0      | 0      | 0      | 0      | 0      | 0      | 0      | 0      | 0      | 0      | 0      | 0      |
| Maribacter           | 3              | 87             | 0      | 0      | 0      | 0      | 0      | 1      | 0      | 0      | 0      | 0      | 0      | 0      | 0      | 0      | 0      | 0      | 0      | 0      |
| Maricaulis           | 3              | 87             | 0      | 0      | 0      | 0      | 0      | 0      | 0      | 0      | 0      | 0      | 0      | 0      | 0      | 0      | 0      | 0      | 0      | 0      |
| Marichromatium       | 1              | 2              | 0      | 0      | 0      | 0      | 0      | 0      | 0      | 0      | 0      | 0      | 0      | 0      | 0      | 0      | 0      | 0      | 0      | 0      |
| Marinithermus        | 2              | 77             | 0      | 0      | 0      | 0      | 0      | 0      | 0      | 0      | 0      | 0      | 0      | 0      | 0      | 0      | 0      | 0      | 0      | 0      |
| Marinitoga           | 1              | 15             | 0      | 0      | 0      | 0      | 0      | 0      | 0      | 0      | 0      | 0      | 0      | 0      | 0      | 0      | 0      | 0      | 0      | 0      |
| Marinobacter         | 2              | 163            | 0      | 0      | 0      | 0      | 0      | 0      | 0      | 0      | 0      | 0      | 0      | 0      | 0      | 0      | 0      | 1      | 0      | 0      |
| Marinomonas          | 3              | 192            | 0      | 0      | 0      | 0      | 1      | 1      | 0      | 0      | 0      | 0      | 0      | 0      | 0      | 0      | 0      | 1      | 0      | 0      |
| Maritimibacter       | 1              | 7              | 0      | 0      | 0      | 0      | 0      | 0      | 0      | 0      | 0      | 0      | 0      | 0      | 0      | 0      | 0      | 0      | 0      | 0      |
| Marivirga            | 2              | 96             | 0      | 0      | 0      | 0      | 0      | 0      | 0      | 0      | 0      | 0      | 0      | 0      | 0      | 0      | 0      | 0      | 0      | 0      |
| Martella             | 1              | 3              | 0      | 0      | 0      | 0      | 0      | 0      | 0      | 0      | 0      | 0      | 0      | 0      | 0      | 0      | 0      | 0      | 0      | 0      |
| Marvinbryantia       | 1              | 1              | 0      | 0      | 0      | 0      | 0      | 0      | 0      | 0      | 0      | 0      | 0      | 0      | 0      | 0      | 0      | 0      | 0      | 0      |
| Massilia             | 1              | 4              | 0      | 0      | 0      | 0      | 0      | 0      | 0      | 0      | 0      | 0      | 0      | 0      | 0      | 0      | 0      | 0      | 0      | 0      |
| Mastigocladopsis     | 1              | 16             | 0      | 0      | 0      | 0      | 0      | 0      | 0      | 0      | 0      | 0      | 0      | 0      | 0      | 0      | 0      | 0      | 0      | 0      |
| Megamonas            | 1              | 47             | 0      | 0      | 0      | 0      | 0      | 0      | 0      | 0      | 0      | 0      | 0      | 0      | 0      | 0      | 0      | 0      | 0      | 0      |
| Megasphaera          | 1              | 14             | 0      | 0      | 0      | 0      | 0      | 0      | 0      | 0      | 0      | 0      | 0      | 0      | 0      | 0      | 0      | 0      | 0      | 0      |
| Meiothermus          | 2              | 110            | 0      | 0      | 0      | 0      | 1      | 0      | 0      | 0      | 0      | 0      | 0      | 0      | 0      | 0      | 0      | 0      | 0      | 0      |
| Melissococcus        | 2              | 46             | 0      | 0      | 0      | 0      | 1      | 0      | 0      | 0      | 0      | 0      | 0      | 0      | 0      | 0      | 0      | 0      | 0      | 0      |
| Mesoflavibacter      | 1              | 6              | 0      | 0      | 0      | 0      | 0      | 0      | 0      | 0      | 0      | 0      | 0      | 0      | 0      | 0      | 0      | 0      | 0      | 0      |
| Mesoplasma           | 1              | 23             | 0      | 0      | 0      | 0      | 0      | 0      | 0      | 0      | 0      | 0      | 0      | 0      | 0      | 0      | 0      | 0      | 0      | 0      |
| Mesorhizobium        | 2              | 201            | 0      | 0      | 0      | 0      | 0      | 0      | 0      | 0      | 0      | 0      | 0      | 0      | 0      | 0      | 0      | 1      | 0      | 0      |
| Mesotoga             | 1              | 14             | 0      | 0      | 0      | 0      | 0      | 0      | 0      | 0      | 0      | 0      | 0      | 0      | 0      | 0      | 0      | 0      | 0      | 0      |
| Metallosphaera       | 1              | 18             | 0      | 0      | 0      | 0      | 0      | 0      | 0      | 0      | 0      | 0      | 0      | 0      | 0      | 0      | 0      | 0      | 0      | 0      |
| Methanobacterium     | 1              | 7              | 0      | 0      | 0      | 0      | 0      | 0      | 0      | 0      | 0      | 0      | 0      | 0      | 0      | 0      | 0      | 0      | 0      | 0      |
| Methanobrevibacter   | 1              | 9              | 0      | 0      | 0      | 0      | 1      | 0      | 0      | 0      | 0      | 0      | 0      | 0      | 0      | 0      | 0      | 0      | 0      | 0      |
| Methanocaldococcus   | 1              | 6              | 0      | 0      | 0      | 0      | 0      | 0      | 0      | 0      | 0      | 0      | 0      | 0      | 0      | 0      | 0      | 0      | 0      | 0      |
| Methanocella         | 1              | 15             | 0      | 0      | 0      | 0      | 0      | 0      | 0      | 0      | 0      | 0      | 0      | 0      | 0      | 0      | 0      | 0      | 0      | 0      |
| Methanococcaceae     | 1              | 1              | 0      | 0      | 0      | 0      | 0      | 0      | 0      | 0      | 0      | 0      | 0      | 0      | 0      | 0      | 0      | 0      | 0      | 0      |
| Methanococcoides     | 1              | 5              | 0      | 0      | 0      | 0      | 0      | 0      | 0      | 0      | 0      | 0      | 0      | 0      | 0      | 0      | 0      | 0      | 0      | 0      |
| Methanococcus        | 1              | 9              | 0      | 0      | 0      | 0      | 0      | 0      | 0      | 0      | 0      | 0      | 0      | 0      | 0      | 0      | 0      | 0      | 0      | 0      |
| Methanocorpusculum   | 1              | 7              | 0      | 0      | 0      | 0      | 0      | 0      | 0      | 0      | 0      | 0      | 0      | 0      | 0      | 0      | 0      | 0      | 0      | 0      |
| Methanoculleus       | 1              | 8              | 0      | 0      | 0      | 0      | 0      | 0      | 0      | 0      | 0      | 0      | 0      | 0      | 0      | 0      | 0      | 0      | 0      | 0      |
| Methanohalobium      | 1              | 5              | 0      | 0      | 0      | 0      | 0      | 0      | 0      | 0      | 0      | 0      | 0      | 0      | 0      | 0      | 0      | 0      | 0      | 0      |
| Methanohalophilus    | 1              | 5              | 0      | 0      | 0      | 0      | 0      | 0      | 0      | 0      | 0      | 0      | 0      | 0      | 0      | 0      | 0      | 0      | 0      | 0      |
| Methanolobus         | 1              | 5              | 0      | 0      | 0      | 0      | 0      | 0      | 0      | 0      | 0      | 0      | 0      | 0      | 0      | 0      | 0      | 0      | 0      | 0      |
| Methanomethylovorans | 1              | 5              | 0      | 0      | 0      | 0      | 0      | 0      | 0      | 0      | 0      | 0      | 0      | 0      | 0      | 0      | 0      | 0      | 0      | 0      |
| Methanoplanus        | 1              | 7              | 0      | 0      | 0      | 0      | 0      | 0      | 0      | 0      | 0      | 0      | 0      | 0      | 0      | 0      | 0      | 0      | 0      | 0      |
| Methanopyrus         | 1              | 4              | 0      | 0      | 0      | 0      | 0      | 0      | 0      | 0      | 0      | 0      | 0      | 0      | 0      | 0      | 0      | 0      | 0      | 0      |
| Methanoregula        | 1              | 8              | 0      | 0      | 0      | 0      | 0      | 0      | 0      | 0      | 0      | 0      | 0      | 0      | 0      | 0      | 0      | 0      | 0      | 0      |
| Methanosaeta         | 1              | 9              | 0      | 0      | 0      | 0      | 1      | 0      | 0      | 0      | 0      | 0      | 0      | 0      | 0      | 0      | 0      | 0      | 0      | 0      |
| Methanosalsum        | 1              | 7              | 0      | 0      | 0      | 0      | 0      | 0      | 0      | 0      | 0      | 0      | 0      | 0      | 0      | 0      | 0      | 0      | 0      | 0      |

| Genus               | Cluster Number | Protein Counts | K11947 | K11948 | K11949 | K13421 | K13953 | K14519 | K14520 | K14579 | K14582 | K14583 | K14584 | K14746 | K14747 | K14748 | K14751 | K15054 | K15058 | K15060 |
|---------------------|----------------|----------------|--------|--------|--------|--------|--------|--------|--------|--------|--------|--------|--------|--------|--------|--------|--------|--------|--------|--------|
| Methanosarcina      | 1              | 18             | 0      | 0      | 0      | 0      | 0      | 0      | 0      | 0      | 0      | 0      | 0      | 0      | 0      | 0      | 0      | 0      | 0      | 0      |
| Methanosphaera      | 1              | 7              | 0      | 0      | 0      | 0      | 0      | 0      | 0      | 0      | 0      | 0      | 0      | 0      | 0      | 0      | 0      | 0      | 0      | 0      |
| Methanosphaerula    | 1              | 8              | 0      | 0      | 0      | 0      | 0      | 0      | 0      | 0      | 0      | 0      | 0      | 0      | 0      | 0      | 0      | 0      | 0      | 0      |
| Methanospirillum    | 1              | 6              | 0      | 0      | 0      | 0      | 0      | 0      | 0      | 0      | 0      | 0      | 0      | 0      | 0      | 0      | 0      | 0      | 0      | 0      |
| Methanothermobacter | 1              | 6              | 0      | 0      | 0      | 0      | 0      | 0      | 0      | 0      | 0      | 0      | 0      | 0      | 0      | 0      | 0      | 0      | 0      | 0      |
| Methanothermococcus | 1              | 5              | 0      | 0      | 0      | 0      | 0      | 0      | 0      | 0      | 0      | 0      | 0      | 0      | 0      | 0      | 0      | 0      | 0      | 0      |
| Methanothermus      | 1              | 5              | 0      | 0      | 0      | 0      | 0      | 0      | 0      | 0      | 0      | 0      | 0      | 0      | 0      | 0      | 0      | 0      | 0      | 0      |
| Methanotorris       | 1              | 5              | 0      | 0      | 0      | 0      | 0      | 0      | 0      | 0      | 0      | 0      | 0      | 0      | 0      | 0      | 0      | 0      | 0      | 0      |
| Methylacidiphilum   | 2              | 48             | 0      | 0      | 0      | 0      | 1      | 0      | 0      | 0      | 0      | 0      | 0      | 0      | 0      | 0      | 0      | 0      | 0      | 0      |
| Methylarcula        | 1              | 2              | 0      | 0      | 0      | 0      | 0      | 0      | 0      | 0      | 0      | 0      | 0      | 0      | 0      | 0      | 0      | 0      | 0      | 0      |
| Methylibium         | 1              | 38             | 0      | 0      | 0      | 0      | 1      | 0      | 0      | 0      | 0      | 0      | 0      | 0      | 0      | 0      | 0      | 0      | 0      | 0      |
| Methylobacillus     | 2              | 61             | 0      | 0      | 0      | 0      | 0      | 0      | 0      | 0      | 0      | 0      | 0      | 0      | 0      | 0      | 0      | 0      | 0      | 0      |
| Methylobacterium    | 3              | 236            | 0      | 0      | 0      | 0      | 1      | 1      | 0      | 0      | 0      | 0      | 0      | 0      | 0      | 0      | 0      | 0      | 0      | 0      |
| Methylocella        | 3              | 117            | 0      | 0      | 0      | 0      | 1      | 0      | 0      | 0      | 0      | 0      | 0      | 0      | 0      | 0      | 0      | 0      | 0      | 0      |
| Methylococcus       | 2              | 80             | 0      | 0      | 0      | 0      | 1      | 0      | 0      | 0      | 0      | 0      | 0      | 0      | 0      | 0      | 0      | 0      | 0      | 0      |
| Methylocystis       | 1              | 21             | 0      | 0      | 0      | 0      | 1      | 0      | 0      | 0      | 0      | 0      | 0      | 0      | 0      | 0      | 0      | 0      | 0      | 0      |
| Methyloferula       | 1              | 2              | 0      | 0      | 0      | 0      | 0      | 0      | 0      | 0      | 0      | 0      | 0      | 0      | 0      | 0      | 0      | 0      | 0      | 0      |
| Methylomicrobium    | 1              | 12             | 0      | 0      | 0      | 0      | 0      | 0      | 0      | 0      | 0      | 0      | 0      | 0      | 0      | 0      | 0      | 0      | 0      | 0      |
| Methylomonas        | 1              | 15             | 0      | 0      | 0      | 0      | 0      | 0      | 0      | 0      | 0      | 0      | 0      | 0      | 0      | 0      | 0      | 0      | 0      | 0      |
| Methylophaga        | 1              | 7              | 0      | 0      | 0      | 0      | 0      | 0      | 0      | 0      | 0      | 0      | 0      | 0      | 0      | 0      | 0      | 0      | 0      | 0      |
| Methylophilus       | 1              | 2              | 0      | 0      | 0      | 0      | 0      | 0      | 0      | 0      | 0      | 0      | 0      | 0      | 0      | 0      | 0      | 0      | 0      | 0      |
| Methylosinus        | 1              | 2              | 0      | 0      | 0      | 0      | 0      | 0      | 0      | 0      | 0      | 0      | 0      | 0      | 0      | 0      | 0      | 0      | 0      | 0      |
| Methylotenera       | 2              | 72             | 0      | 0      | 0      | 0      | 0      | 0      | 0      | 0      | 0      | 0      | 0      | 0      | 0      | 0      | 0      | 0      | 0      | 0      |
| Methyloversatilis   | 1              | 5              | 0      | 0      | 0      | 0      | 0      | 0      | 0      | 0      | 0      | 0      | 0      | 0      | 0      | 0      | 0      | 0      | 0      | 0      |
| Methylovorus        | 2              | 66             | 0      | 0      | 0      | 0      | 0      | 0      | 0      | 0      | 0      | 0      | 0      | 0      | 0      | 0      | 0      | 0      | 0      | 0      |
| Micavibrio          | 1              | 9              | 0      | 0      | 0      | 0      | 0      | 0      | 0      | 0      | 0      | 0      | 0      | 0      | 0      | 0      | 0      | 0      | 0      | 0      |
| Microbacterium      | 2              | 115            | 0      | 0      | 0      | 0      | 1      | 0      | 0      | 0      | 0      | 0      | 0      | 0      | 0      | 0      | 0      | 0      | 0      | 0      |
| Microchaete         | 1              | 23             | 0      | 0      | 0      | 0      | 0      | 0      | 0      | 0      | 0      | 0      | 0      | 0      | 0      | 0      | 0      | 0      | 0      | 0      |
| Micrococcus         | 2              | 72             | 0      | 0      | 0      | 0      | 1      | 0      | 0      | 0      | 0      | 0      | 0      | 0      | 0      | 0      | 0      | 0      | 0      | 0      |
| Microcoleus         | 1              | 17             | 0      | 0      | 0      | 1      | 0      | 0      | 0      | 0      | 0      | 0      | 0      | 0      | 0      | 0      | 0      | 0      | 0      | 0      |
| Microcystis         | 2              | 67             | 0      | 0      | 0      | 1      | 0      | 0      | 0      | 0      | 0      | 0      | 0      | 0      | 0      | 0      | 0      | 0      | 0      | 0      |
| Microlunatus        | 1              | 25             | 0      | 0      | 0      | 0      | 1      | 1      | 0      | 0      | 0      | 0      | 0      | 0      | 0      | 0      | 0      | 0      | 0      | 0      |
| Micromonospora      | 2              | 115            | 0      | 0      | 0      | 0      | 1      | 0      | 0      | 0      | 0      | 0      | 0      | 0      | 0      | 0      | 0      | 0      | 0      | 0      |
| Microvirga          | 1              | 6              | 0      | 0      | 0      | 0      | 0      | 0      | 0      | 0      | 0      | 0      | 0      | 0      | 0      | 0      | 0      | 0      | 0      | 0      |
| Mobiluncus          | 1              | 41             | 0      | 0      | 0      | 0      | 0      | 0      | 0      | 0      | 0      | 0      | 0      | 0      | 0      | 0      | 0      | 0      | 0      | 0      |
| Modestobacter       | 1              | 43             | 0      | 0      | 0      | 0      | 1      | 0      | 0      | 0      | 0      | 0      | 0      | 0      | 0      | 0      | 0      | 0      | 0      | 0      |
| Moorea              | 1              | 2              | 0      | 0      | 0      | 0      | 0      | 0      | 0      | 0      | 0      | 0      | 0      | 0      | 0      | 0      | 0      | 0      | 0      | 0      |
| Moorella            | 2              | 69             | 0      | 0      | 0      | 0      | 0      | 0      | 0      | 0      | 0      | 0      | 0      | 0      | 0      | 0      | 0      | 0      | 0      | 0      |
| Moraxella           | 2              | 66             | 0      | 0      | 0      | 0      | 0      | 0      | 0      | 0      | 0      | 0      | 0      | 0      | 0      | 0      | 0      | 0      | 0      | 0      |
| Morganella          | 1              | 29             | 0      | 0      | 0      | 0      | 1      | 0      | 0      | 0      | 0      | 0      | 0      | 0      | 0      | 0      | 0      | 0      | 0      | 0      |
| Moritella           | 1              | 2              | 0      | 0      | 0      | 0      | 0      | 0      | 0      | 0      | 0      | 0      | 0      | 0      | 0      | 0      | 0      | 0      | 0      | 0      |
| Muricauda           | 1              | 23             | 0      | 0      | 0      | 0      | 0      | 1      | 0      | 0      | 0      | 0      | 0      | 0      | 0      | 0      | 0      | 0      | 0      | 0      |
| Mycobacterium       | 3              | 306            | 1      | 1      | 1      | 0      | 1      | 1      | 1      | 0      | 0      | 0      | 0      | 0      | 0      | 0      | 0      | 0      | 0      | 0      |
| Mycoplasma          | 1              | 53             | 0      | 0      | 0      | 0      | 1      | 0      | 0      | 0      | 0      | 0      | 0      | 0      | 0      | 0      | 0      | 0      | 0      | 0      |
| Myxococcus          | 2              | 110            | 0      | 0      | 0      | 0      | 1      | 1      | 0      | 0      | 0      | 0      | 0      | 0      | 0      | 0      | 0      | 0      | 0      | 0      |
| Nakamurella         | 2              | 115            | 0      | 0      | 0      | 0      | 1      | 0      | 0      | 0      | 0      | 0      | 0      | 0      | 0      | 0      | 0      | 0      | 0      | 0      |
| napthalene          | 1              | 2              | 0      | 0      | 0      | 0      | 0      | 0      | 0      | 1      | 0      | 0      | 0      | 0      | 0      | 0      | 0      | 0      | 0      | 0      |
| Natranaerobius      | 2              | 55             | 0      | 0      | 0      | 0      | 0      | 0      | 0      | 0      | 0      | 0      | 0      | 0      | 0      | 0      | 0      | 0      | 0      | 0      |
| Natrialba           | 1              | 16             | 0      | 0      | 0      | 0      | 0      | 0      | 0      | 0      | 0      | 0      | 0      | 0      | 0      | 0      | 0      | 0      | 0      | 0      |
| Natrinema           | 1              | 16             | 0      | 0      | 0      | 0      | 1      | 0      | 0      | 0      | 0      | 0      | 0      | 0      | 0      | 0      | 0      | 0      | 0      | 0      |
| Natronobacterium    | 1              | 11             | 0      | 0      | 0      | 0      | 0      | 0      | 0      | 0      | 0      | 0      | 0      | 0      | 0      | 0      | 0      | 0      | 0      | 0      |
| Natronococcus       | 1              | 21             | 0      | 0      | 0      | 0      | 1      | 0      | 0      | 0      | 0      | 0      | 0      | 0      | 0      | 0      | 0      | 0      | 0      | 0      |

| Genus             | Cluster Number | Protein Counts | K11947 | K11948 | K11949 | K13421 | K13953 | K14519 | K14520 | K14579 | K14582 | K14583 | K14584 | K14746 | K14747 | K14748 | K14751 | K15054 | K15058 | K15060 |
|-------------------|----------------|----------------|--------|--------|--------|--------|--------|--------|--------|--------|--------|--------|--------|--------|--------|--------|--------|--------|--------|--------|
| Natronomonas      | 1              | 20             | 0      | 0      | 0      | 0      | 0      | 0      | 0      | 0      | 0      | 0      | 0      | 0      | 0      | 0      | 0      | 0      | 0      | 0      |
| Nautilia          | 2              | 48             | 0      | 0      | 0      | 0      | 0      | 0      | 0      | 0      | 0      | 0      | 0      | 0      | 0      | 0      | 0      | 0      | 0      | 0      |
| Neisseria         | 2              | 67             | 0      | 0      | 0      | 0      | 1      | 0      | 0      | 0      | 0      | 0      | 0      | 0      | 0      | 0      | 0      | 0      | 0      | 0      |
| Neisseriaceae     | 1              | 1              | 0      | 0      | 0      | 0      | 0      | 0      | 0      | 0      | 0      | 0      | 0      | 0      | 0      | 0      | 0      | 0      | 0      | 0      |
| Neorickettsia     | 1              | 31             | 0      | 0      | 0      | 0      | 0      | 0      | 0      | 0      | 0      | 0      | 0      | 0      | 0      | 0      | 0      | 0      | 0      | 0      |
| Neptuniibacter    | 1              | 2              | 0      | 0      | 0      | 0      | 0      | 0      | 0      | 0      | 0      | 0      | 0      | 0      | 0      | 0      | 0      | 0      | 0      | 0      |
| Niastella         | 1              | 21             | 0      | 0      | 0      | 0      | 1      | 1      | 0      | 0      | 0      | 0      | 0      | 0      | 0      | 0      | 0      | 0      | 0      | 0      |
| Nitratifractor    | 2              | 54             | 0      | 0      | 0      | 0      | 0      | 0      | 0      | 0      | 0      | 0      | 0      | 0      | 0      | 0      | 0      | 0      | 0      | 0      |
| Nitratireductor   | 1              | 19             | 0      | 0      | 0      | 0      | 0      | 0      | 0      | 0      | 0      | 0      | 0      | 0      | 0      | 0      | 0      | 0      | 0      | 0      |
| Nitratiruptor     | 2              | 40             | 0      | 0      | 0      | 0      | 0      | 0      | 0      | 0      | 0      | 0      | 0      | 0      | 0      | 0      | 0      | 0      | 0      | 0      |
| Nitrobacter       | 2              | 99             | 0      | 0      | 0      | 0      | 1      | 0      | 0      | 0      | 0      | 0      | 0      | 0      | 0      | 0      | 0      | 0      | 0      | 0      |
| Nitrococcus       | 1              | 2              | 0      | 0      | 0      | 0      | 0      | 0      | 0      | 0      | 0      | 0      | 0      | 0      | 0      | 0      | 0      | 0      | 0      | 0      |
| Nitrosococcus     | 2              | 94             | 0      | 0      | 0      | 0      | 0      | 0      | 0      | 0      | 0      | 0      | 0      | 0      | 0      | 0      | 0      | 0      | 0      | 0      |
| Nitrosomonas      | 2              | 72             | 0      | 0      | 0      | 0      | 0      | 0      | 0      | 0      | 0      | 0      | 0      | 0      | 0      | 0      | 0      | 0      | 0      | 0      |
| Nitrosopumilaceae | 1              | 7              | 0      | 0      | 0      | 0      | 1      | 0      | 0      | 0      | 0      | 0      | 0      | 0      | 0      | 0      | 0      | 0      | 0      | 0      |
| Nitrosopumilus    | 1              | 11             | 0      | 0      | 0      | 0      | 1      | 0      | 0      | 0      | 0      | 0      | 0      | 0      | 0      | 0      | 0      | 0      | 0      | 0      |
| Nitrospira        | 2              | 74             | 0      | 0      | 0      | 0      | 1      | 0      | 0      | 0      | 0      | 0      | 0      | 0      | 0      | 0      | 0      | 0      | 0      | 0      |
| Nocardia          | 2              | 185            | 0      | 0      | 0      | 0      | 1      | 1      | 0      | 0      | 0      | 0      | 0      | 0      | 0      | 0      | 0      | 0      | 0      | 0      |
| Nocardioidaceae   | 1              | 2              | 0      | 0      | 0      | 0      | 0      | 0      | 0      | 0      | 0      | 0      | 0      | 0      | 0      | 0      | 0      | 0      | 0      | 0      |
| Nocardioides      | 2              | 157            | 0      | 0      | 0      | 0      | 1      | 1      | 0      | 0      | 0      | 0      | 0      | 0      | 0      | 0      | 0      | 0      | 0      | 0      |
| Nocardiopsis      | 2              | 102            | 0      | 0      | 0      | 0      | 1      | 1      | 0      | 0      | 0      | 0      | 0      | 0      | 0      | 0      | 0      | 0      | 0      | 0      |
| Nodularia         | 1              | 22             | 0      | 0      | 0      | 0      | 0      | 0      | 0      | 0      | 0      | 0      | 0      | 0      | 0      | 0      | 0      | 0      | 0      | 0      |
| Nonlabens         | 1              | 19             | 0      | 0      | 0      | 0      | 1      | 0      | 0      | 0      | 0      | 0      | 0      | 0      | 0      | 0      | 0      | 0      | 0      | 0      |
| Nostoc            | 2              | 111            | 0      | 0      | 0      | 1      | 1      | 0      | 0      | 0      | 0      | 0      | 0      | 0      | 0      | 0      | 0      | 0      | 0      | 0      |
| Nostocaceae       | 1              | 2              | 0      | 0      | 0      | 0      | 0      | 0      | 0      | 0      | 0      | 0      | 0      | 0      | 0      | 0      | 0      | 0      | 0      | 0      |
| Novosphingobium   | 2              | 169            | 0      | 0      | 0      | 0      | 1      | 1      | 1      | 1      | 0      | 0      | 0      | 0      | 0      | 1      | 1      | 0      | 0      | 0      |
| Oceanibaculum     | 1              | 3              | 0      | 0      | 0      | 0      | 0      | 0      | 0      | 0      | 0      | 0      | 0      | 0      | 0      | 0      | 0      | 0      | 0      | 0      |
| Oceanibulbus      | 1              | 12             | 0      | 0      | 0      | 0      | 0      | 0      | 0      | 0      | 0      | 0      | 0      | 0      | 0      | 0      | 0      | 0      | 0      | 0      |
| Oceanicola        | 1              | 9              | 0      | 0      | 0      | 0      | 0      | 0      | 0      | 0      | 0      | 0      | 0      | 0      | 0      | 0      | 0      | 0      | 0      | 0      |
| Oceanimonas       | 1              | 33             | 0      | 0      | 0      | 0      | 0      | 0      | 0      | 0      | 0      | 0      | 0      | 0      | 0      | 0      | 0      | 0      | 0      | 0      |
| Oceaniovalibus    | 1              | 2              | 0      | 0      | 0      | 0      | 0      | 0      | 0      | 0      | 0      | 0      | 0      | 0      | 0      | 0      | 0      | 0      | 0      | 0      |
| Oceanithermus     | 2              | 72             | 0      | 0      | 0      | 0      | 0      | 0      | 0      | 0      | 0      | 0      | 0      | 0      | 0      | 0      | 0      | 0      | 0      | 0      |
| Oceanobacillus    | 2              | 91             | 0      | 0      | 0      | 0      | 0      | 0      | 0      | 0      | 0      | 0      | 0      | 0      | 0      | 0      | 0      | 0      | 0      | 0      |
| Oceanospirillum   | 1              | 2              | 0      | 0      | 0      | 0      | 0      | 0      | 0      | 0      | 0      | 0      | 0      | 0      | 0      | 0      | 0      | 0      | 0      | 0      |
| Ochrobactrum      | 2              | 133            | 0      | 0      | 0      | 0      | 1      | 0      | 0      | 0      | 0      | 0      | 0      | 0      | 0      | 0      | 0      | 0      | 0      | 0      |
| Octadecabacter    | 1              | 29             | 0      | 0      | 0      | 0      | 0      | 1      | 0      | 0      | 0      | 0      | 0      | 0      | 0      | 0      | 0      | 0      | 0      | 0      |
| Oenococcus        | 2              | 41             | 0      | 0      | 0      | 0      | 1      | 0      | 0      | 0      | 0      | 0      | 0      | 0      | 0      | 0      | 0      | 0      | 0      | 0      |
| Oleomonas         | 1              | 2              | 0      | 0      | 0      | 0      | 0      | 0      | 0      | 0      | 0      | 0      | 0      | 0      | 0      | 0      | 0      | 0      | 0      | 0      |
| Oligotropha       | 3              | 87             | 0      | 0      | 0      | 0      | 1      | 0      | 0      | 0      | 0      | 0      | 0      | 0      | 0      | 0      | 0      | 0      | 0      | 0      |
| Olsenella         | 2              | 40             | 0      | 0      | 0      | 0      | 0      | 0      | 0      | 0      | 0      | 0      | 0      | 0      | 0      | 0      | 0      | 0      | 0      | 0      |
| Opitutus          | 2              | 67             | 0      | 0      | 0      | 0      | 0      | 1      | 0      | 0      | 0      | 0      | 0      | 0      | 0      | 0      | 0      | 0      | 0      | 0      |
| Orientia          | 1              | 21             | 0      | 0      | 0      | 0      | 0      | 0      | 0      | 0      | 0      | 0      | 0      | 0      | 0      | 0      | 0      | 0      | 0      | 0      |
| Ornithobacterium  | 1              | 11             | 0      | 0      | 0      | 1      | 0      | 0      | 0      | 0      | 0      | 0      | 0      | 0      | 0      | 0      | 0      | 0      | 0      | 0      |
| Oscillatoria      | 1              | 16             | 0      | 0      | 0      | 1      | 0      | 0      | 0      | 0      | 0      | 0      | 0      | 0      | 0      | 0      | 0      | 0      | 0      | 0      |
| Oscillatoriales   | 1              | 2              | 0      | 0      | 0      | 0      | 0      | 0      | 0      | 0      | 0      | 0      | 0      | 0      | 0      | 0      | 0      | 0      | 0      | 0      |
| Oscillibacter     | 1              | 20             | 0      | 0      | 0      | 0      | 0      | 0      | 0      | 0      | 0      | 0      | 0      | 0      | 0      | 0      | 0      | 0      | 0      | 0      |
| Owenweeksia       | 1              | 15             | 0      | 0      | 0      | 0      | 0      | 0      | 0      | 0      | 0      | 0      | 0      | 0      | 0      | 0      | 0      | 0      | 0      | 0      |
| Oxalobacteraceae  | 1              | 4              | 0      | 0      | 0      | 0      | 0      | 0      | 0      | 0      | 0      | 0      | 0      | 0      | 0      | 0      | 0      | 0      | 0      | 0      |
| Paenibacillus     | 2              | 152            | 0      | 0      | 0      | 0      | 1      | 0      | 0      | 0      | 0      | 0      | 0      | 0      | 0      | 0      | 0      | 0      | 0      | 0      |
| Paludibacter      | 2              | 67             | 0      | 0      | 0      | 0      | 0      | 0      | 0      | 0      | 0      | 0      | 0      | 0      | 0      | 0      | 0      | 0      | 0      | 0      |
| Pandoraea         | 1              | 18             | 0      | 0      | 0      | 0      | 0      | 0      | 0      | 0      | 0      | 0      | 0      | 0      | 0      | 0      | 0      | 0      | 0      | 0      |
| Pannonibacter     | 1              | 3              | 0      | 0      | 0      | 0      | 0      | 0      | 0      | 0      | 0      | 0      | 0      | 0      | 0      | 0      | 0      | 0      | 0      | 0      |

| Genus              | Cluster Number | Protein Counts | K11947 | K11948 | K11949 | K13421 | K13953 | K14519 | K14520 | K14579 | K14582 | K14583 | K14584 | K14746 | K14747 | K14748 | K14751 | K15054 | K15058 | K15060 |
|--------------------|----------------|----------------|--------|--------|--------|--------|--------|--------|--------|--------|--------|--------|--------|--------|--------|--------|--------|--------|--------|--------|
| Pantholops         | 1              | 23             | 0      | 0      | 0      | 0      | 0      | 0      | 0      | 0      | 0      | 0      | 0      | 0      | 0      | 0      | 0      | 0      | 0      | 0      |
| Pantoea            | 2              | 181            | 0      | 0      | 0      | 0      | 1      | 1      | 0      | 0      | 0      | 0      | 0      | 0      | 0      | 0      | 0      | 1      | 0      | 0      |
| Parabacteroides    | 2              | 64             | 0      | 0      | 0      | 0      | 0      | 0      | 0      | 0      | 0      | 0      | 0      | 0      | 0      | 0      | 0      | 0      | 0      | 0      |
| Parachlamydia      | 1              | 11             | 0      | 0      | 0      | 0      | 1      | 0      | 0      | 0      | 0      | 0      | 0      | 0      | 0      | 0      | 0      | 0      | 0      | 0      |
| Paracoccus         | 2              | 169            | 0      | 0      | 0      | 0      | 1      | 1      | 0      | 0      | 0      | 0      | 0      | 0      | 0      | 0      | 0      | 1      | 0      | 0      |
| Parvibaculum       | 3              | 117            | 0      | 0      | 0      | 0      | 1      | 0      | 0      | 0      | 0      | 1      | 0      | 0      | 0      | 0      | 0      | 0      | 0      | 0      |
| Parvularcula       | 2              | 72             | 0      | 0      | 0      | 0      | 0      | 0      | 0      | 0      | 0      | 0      | 0      | 0      | 0      | 0      | 0      | 0      | 0      | 0      |
| Pasteurella        | 2              | 85             | 0      | 0      | 0      | 0      | 0      | 0      | 0      | 0      | 0      | 0      | 0      | 0      | 0      | 0      | 0      | 0      | 0      | 0      |
| Pasteurellaceae    | 1              | 2              | 0      | 0      | 0      | 0      | 0      | 0      | 0      | 0      | 0      | 0      | 0      | 0      | 0      | 0      | 0      | 0      | 0      | 0      |
| Pectobacterium     | 1              | 44             | 0      | 0      | 0      | 0      | 1      | 0      | 0      | 0      | 0      | 0      | 0      | 0      | 0      | 0      | 0      | 0      | 0      | 0      |
| Pediococcus        | 1              | 43             | 0      | 0      | 0      | 0      | 0      | 0      | 0      | 0      | 0      | 0      | 0      | 0      | 0      | 0      | 0      | 0      | 0      | 0      |
| Pedobacter         | 2              | 88             | 0      | 0      | 0      | 0      | 0      | 0      | 0      | 0      | 0      | 0      | 0      | 0      | 0      | 0      | 0      | 0      | 0      | 0      |
| Pelagibaca         | 1              | 10             | 0      | 0      | 0      | 0      | 0      | 0      | 0      | 0      | 0      | 0      | 0      | 0      | 0      | 0      | 0      | 0      | 0      | 0      |
| Pelagibacterium    | 1              | 39             | 0      | 0      | 0      | 0      | 0      | 1      | 0      | 0      | 0      | 0      | 0      | 0      | 0      | 0      | 0      | 0      | 0      | 0      |
| Pelobacter         | 2              | 85             | 0      | 0      | 0      | 0      | 0      | 0      | 0      | 0      | 0      | 0      | 0      | 0      | 0      | 0      | 0      | 0      | 0      | 0      |
| Pelodictyon        | 2              | 62             | 0      | 0      | 0      | 0      | 0      | 0      | 0      | 0      | 0      | 0      | 0      | 0      | 0      | 0      | 0      | 0      | 0      | 0      |
| Pelosinus          | 1              | 1              | 0      | 0      | 0      | 0      | 0      | 0      | 0      | 0      | 0      | 0      | 0      | 0      | 0      | 0      | 0      | 0      | 0      | 0      |
| Pelotomaculum      | 2              | 60             | 0      | 0      | 0      | 0      | 0      | 0      | 0      | 0      | 0      | 0      | 0      | 0      | 0      | 0      | 0      | 0      | 0      | 0      |
| Peptostreptococcus | 1              | 1              | 0      | 0      | 0      | 0      | 0      | 0      | 0      | 0      | 0      | 0      | 0      | 0      | 0      | 0      | 0      | 0      | 0      | 0      |
| Persephonella      | 2              | 55             | 0      | 0      | 0      | 0      | 0      | 0      | 0      | 0      | 0      | 0      | 0      | 0      | 0      | 0      | 0      | 0      | 0      | 0      |
| Petrotoga          | 2              | 72             | 0      | 0      | 0      | 0      | 0      | 0      | 0      | 0      | 0      | 0      | 0      | 0      | 0      | 0      | 0      | 0      | 0      | 0      |
| Phaeobacter        | 2              | 55             | 0      | 0      | 0      | 0      | 0      | 0      | 0      | 0      | 0      | 0      | 0      | 0      | 0      | 0      | 0      | 0      | 0      | 0      |
| Phenylobacterium   | 3              | 103            | 0      | 0      | 0      | 0      | 1      | 0      | 1      | 0      | 0      | 0      | 0      | 0      | 0      | 0      | 0      | 0      | 0      | 0      |
| Photobacterium     | 2              | 119            | 0      | 0      | 0      | 0      | 0      | 0      | 0      | 0      | 0      | 0      | 0      | 0      | 0      | 0      | 0      | 0      | 0      | 0      |
| Photorhabdus       | 2              | 149            | 0      | 0      | 0      | 0      | 0      | 1      | 0      | 0      | 0      | 0      | 0      | 0      | 0      | 0      | 0      | 1      | 0      | 0      |
| Phycisphaera       | 1              | 9              | 0      | 0      | 0      | 0      | 0      | 0      | 0      | 0      | 0      | 0      | 0      | 0      | 0      | 0      | 0      | 0      | 0      | 0      |
| Phyllobacterium    | 1              | 6              | 0      | 0      | 0      | 0      | 0      | 0      | 0      | 0      | 0      | 0      | 0      | 0      | 0      | 0      | 0      | 0      | 0      | 0      |
| Picrophilus        | 1              | 15             | 0      | 0      | 0      | 0      | 1      | 0      | 0      | 0      | 0      | 0      | 0      | 0      | 0      | 0      | 0      | 0      | 0      | 0      |
| Pirellula          | 2              | 85             | 0      | 0      | 0      | 0      | 0      | 1      | 0      | 0      | 0      | 0      | 0      | 0      | 0      | 0      | 0      | 0      | 0      | 0      |
| Planctomyces       | 2              | 93             | 0      | 0      | 0      | 0      | 0      | 1      | 0      | 0      | 0      | 0      | 0      | 0      | 0      | 0      | 0      | 0      | 0      | 0      |
| Plautia            | 1              | 17             | 0      | 0      | 0      | 0      | 0      | 0      | 0      | 0      | 0      | 0      | 0      | 0      | 0      | 0      | 0      | 0      | 0      | 0      |
| Plesiomonas        | 1              | 4              | 0      | 0      | 0      | 0      | 0      | 0      | 0      | 0      | 0      | 0      | 0      | 0      | 0      | 0      | 0      | 0      | 0      | 0      |
| Pleurocapsa        | 1              | 23             | 0      | 0      | 0      | 1      | 1      | 0      | 0      | 0      | 0      | 0      | 0      | 0      | 0      | 0      | 0      | 0      | 0      | 0      |
| Polaribacter       | 2              | 74             | 0      | 0      | 0      | 0      | 0      | 0      | 0      | 0      | 0      | 0      | 0      | 0      | 0      | 0      | 0      | 0      | 0      | 0      |
| Polaromonas        | 3              | 238            | 0      | 0      | 0      | 0      | 1      | 1      | 0      | 1      | 1      | 1      | 1      | 0      | 0      | 0      | 0      | 1      | 0      | 0      |
| Polymorphum        | 3              | 173            | 0      | 0      | 0      | 0      | 0      | 0      | 0      | 0      | 0      | 0      | 0      | 0      | 0      | 0      | 0      | 0      | 0      | 0      |
| Polynucleobacter   | 1              | 19             | 0      | 0      | 0      | 0      | 0      | 0      | 0      | 0      | 0      | 0      | 0      | 0      | 0      | 0      | 0      | 0      | 0      | 0      |
| Ponticaulis        | 1              | 1              | 0      | 0      | 0      | 0      | 0      | 0      | 0      | 0      | 0      | 0      | 0      | 0      | 0      | 0      | 0      | 0      | 0      | 0      |
| Porphyromonas      | 2              | 63             | 0      | 0      | 0      | 0      | 0      | 0      | 0      | 0      | 0      | 0      | 0      | 0      | 0      | 0      | 0      | 0      | 0      | 0      |
| Prevotella         | 1              | 65             | 0      | 0      | 0      | 0      | 0      | 0      | 0      | 0      | 0      | 0      | 0      | 0      | 0      | 0      | 0      | 0      | 0      | 0      |
| Prochlorococcus    | 2              | 68             | 0      | 0      | 0      | 0      | 0      | 0      | 0      | 0      | 0      | 0      | 0      | 0      | 0      | 0      | 0      | 0      | 0      | 0      |
| Propionibacterium  | 1              | 62             | 0      | 0      | 0      | 0      | 1      | 0      | 0      | 0      | 0      | 0      | 0      | 0      | 0      | 0      | 0      | 0      | 0      | 0      |
| Prosthecochloris   | 1              | 16             | 0      | 0      | 0      | 0      | 0      | 0      | 0      | 0      | 0      | 0      | 0      | 0      | 0      | 0      | 0      | 0      | 0      | 0      |
| Proteobacteria     | 1              | 19             | 0      | 0      | 0      | 0      | 0      | 0      | 0      | 0      | 0      | 0      | 0      | 0      | 0      | 0      | 0      | 0      | 0      | 0      |
| Proteus            | 2              | 113            | 0      | 0      | 0      | 0      | 0      | 0      | 0      | 0      | 0      | 0      | 0      | 0      | 0      | 0      | 0      | 0      | 0      | 0      |
| Providencia        | 1              | 38             | 0      | 0      | 0      | 0      | 0      | 0      | 0      | 0      | 0      | 0      | 0      | 0      | 0      | 0      | 0      | 0      | 0      | 0      |
| Pseudaminobacter   | 1              | 10             | 0      | 0      | 0      | 0      | 0      | 0      | 0      | 0      | 0      | 0      | 0      | 0      | 0      | 0      | 0      | 0      | 0      | 0      |
| Pseudanabaena      | 1              | 11             | 0      | 0      | 0      | 1      | 0      | 0      | 0      | 0      | 0      | 0      | 0      | 0      | 0      | 0      | 0      | 0      | 0      | 0      |
| Pseudoalteromonas  | 2              | 188            | 0      | 0      | 0      | 0      | 1      | 0      | 0      | 0      | 0      | 0      | 0      | 0      | 0      | 0      | 0      | 0      | 0      | 0      |
| Pseudochrobactrum  | 1              | 7              | 0      | 0      | 0      | 0      | 0      | 0      | 0      | 0      | 0      | 0      | 0      | 0      | 0      | 0      | 0      | 0      | 0      | 0      |
| Pseudogulbenkiania | 1              | 40             | 0      | 0      | 0      | 0      | 0      | 1      | 0      | 0      | 0      | 0      | 0      | 0      | 0      | 0      | 0      | 0      | 0      | 0      |
| pseudomallei       | 3              | 131            | 0      | 0      | 0      | 0      | 1      | 0      | 0      | 0      | 0      | 0      | 0      | 0      | 0      | 0      | 0      | 0      | 0      | 0      |

| Genus                   | Cluster Number | Protein Counts | K11947 | K11948 | K11949 | K13421 | K13953 | K14519 | K14520 | K14579 | K14582 | K14583 | K14584 | K14746 | K14747 | K14748 | K14751 | K15054 | K15058 | K15060 |
|-------------------------|----------------|----------------|--------|--------|--------|--------|--------|--------|--------|--------|--------|--------|--------|--------|--------|--------|--------|--------|--------|--------|
| Pseudomonas             | 3              | 381            | 0      | 0      | 0      | 0      | 1      | 1      | 0      | 1      | 1      | 1      | 1      | 0      | 0      | 0      | 0      | 1      | 1      | 0      |
| Pseudonocardia          | 3              | 180            | 0      | 0      | 0      | 0      | 1      | 1      | 1      | 0      | 0      | 0      | 0      | 0      | 0      | 0      | 0      | 0      | 0      | 1      |
| Pseudorhodobacter       | 1              | 4              | 0      | 0      | 0      | 0      | 0      | 0      | 0      | 0      | 0      | 0      | 0      | 0      | 0      | 0      | 0      | 0      | 0      | 0      |
| Pseudovibrio            | 1              | 33             | 0      | 0      | 0      | 0      | 1      | 1      | 0      | 0      | 0      | 0      | 0      | 0      | 0      | 0      | 0      | 0      | 0      | 0      |
| Pseudoxanthomonas       | 2              | 124            | 0      | 0      | 0      | 0      | 1      | 1      | 0      | 0      | 0      | 0      | 0      | 0      | 0      | 0      | 0      | 0      | 0      | 0      |
| Psychrobacter           | 2              | 124            | 0      | 0      | 0      | 0      | 0      | 0      | 0      | 0      | 0      | 0      | 0      | 0      | 0      | 0      | 0      | 0      | 0      | 0      |
| Psychroflexus           | 1              | 22             | 0      | 0      | 0      | 0      | 0      | 1      | 0      | 0      | 0      | 0      | 0      | 0      | 0      | 0      | 0      | 0      | 0      | 0      |
| Psychromonas            | 2              | 110            | 0      | 0      | 0      | 0      | 0      | 0      | 0      | 0      | 0      | 0      | 0      | 0      | 0      | 0      | 0      | 0      | 0      | 0      |
| Pusillimonas            | 3              | 111            | 0      | 0      | 0      | 0      | 0      | 0      | 0      | 0      | 0      | 0      | 0      | 0      | 0      | 0      | 0      | 0      | 0      | 0      |
| Pyrobaculum             | 1              | 15             | 0      | 0      | 0      | 0      | 1      | 0      | 0      | 0      | 0      | 0      | 0      | 0      | 0      | 0      | 0      | 0      | 0      | 0      |
| Pyrococcus              | 1              | 10             | 0      | 0      | 0      | 0      | 0      | 0      | 0      | 0      | 0      | 0      | 0      | 0      | 0      | 0      | 0      | 0      | 0      | 0      |
| Pyrolobus               | 1              | 4              | 0      | 0      | 0      | 0      | 0      | 0      | 0      | 0      | 0      | 0      | 0      | 0      | 0      | 0      | 0      | 0      | 0      | 0      |
| Rahnella                | 2              | 143            | 0      | 0      | 0      | 0      | 1      | 0      | 0      | 1      | 0      | 0      | 0      | 0      | 0      | 0      | 0      | 1      | 0      | 0      |
| Ralstonia               | 3              | 332            | 0      | 0      | 0      | 0      | 1      | 1      | 0      | 1      | 1      | 1      | 1      | 0      | 0      | 0      | 0      | 1      | 0      | 0      |
| Ramlibacter             | 1              | 35             | 0      | 0      | 0      | 0      | 0      | 0      | 0      | 0      | 0      | 0      | 0      | 0      | 0      | 0      | 0      | 0      | 0      | 0      |
| Raoultella              | 2              | 139            | 0      | 0      | 0      | 0      | 1      | 1      | 0      | 0      | 0      | 0      | 0      | 0      | 0      | 0      | 0      | 0      | 0      | 0      |
| Raphidiopsis            | 1              | 5              | 0      | 0      | 0      | 0      | 0      | 0      | 0      | 0      | 0      | 0      | 0      | 0      | 0      | 0      | 0      | 0      | 0      | 0      |
| Reinekea                | 1              | 2              | 0      | 0      | 0      | 0      | 0      | 0      | 0      | 0      | 0      | 0      | 0      | 0      | 0      | 0      | 0      | 0      | 0      | 0      |
| Renibacterium           | 2              | 67             | 0      | 0      | 0      | 0      | 0      | 1      | 0      | 0      | 0      | 0      | 0      | 0      | 0      | 0      | 0      | 0      | 0      | 0      |
| Rhizobiaceae            | 1              | 3              | 0      | 0      | 0      | 0      | 0      | 0      | 0      | 0      | 0      | 0      | 0      | 0      | 0      | 0      | 0      | 0      | 0      | 0      |
| Rhizobiales             | 1              | 6              | 0      | 0      | 0      | 0      | 0      | 0      | 0      | 0      | 0      | 0      | 0      | 0      | 0      | 0      | 0      | 0      | 0      | 0      |
| Rhizobium               | 3              | 257            | 0      | 0      | 0      | 0      | 1      | 1      | 1      | 0      | 0      | 0      | 0      | 0      | 0      | 0      | 0      | 0      | 0      | 0      |
| Rhizobium/Agrobacterium | 2              | 87             | 0      | 0      | 0      | 0      | 0      | 0      | 0      | 0      | 0      | 0      | 0      | 0      | 0      | 0      | 0      | 0      | 0      | 0      |
| Rhodanobacter           | 1              | 21             | 0      | 0      | 0      | 0      | 1      | 0      | 0      | 0      | 0      | 0      | 0      | 0      | 0      | 0      | 0      | 0      | 0      | 0      |
| Rhodobacter             | 3              | 175            | 0      | 0      | 0      | 0      | 1      | 1      | 0      | 0      | 0      | 0      | 0      | 0      | 0      | 0      | 0      | 0      | 0      | 0      |
| Rhodobacteraceae        | 1              | 21             | 0      | 0      | 0      | 0      | 0      | 0      | 0      | 0      | 0      | 0      | 0      | 0      | 0      | 0      | 0      | 0      | 0      | 0      |
| Rhodobacterales         | 1              | 34             | 0      | 0      | 0      | 0      | 0      | 0      | 0      | 0      | 0      | 0      | 0      | 0      | 0      | 0      | 0      | 0      | 0      | 0      |
| Rhodococcus             | 2              | 292            | 0      | 0      | 1      | 0      | 1      | 1      | 1      | 0      | 0      | 0      | 0      | 0      | 0      | 1      | 1      | 0      | 0      | 0      |
| Rhodocyclaceae          | 1              | 7              | 0      | 0      | 0      | 0      | 0      | 0      | 0      | 0      | 0      | 0      | 0      | 0      | 0      | 0      | 0      | 0      | 0      | 0      |
| Rhodoferax              | 3              | 144            | 0      | 0      | 0      | 0      | 0      | 0      | 0      | 0      | 0      | 0      | 0      | 0      | 0      | 0      | 0      | 0      | 0      | 0      |
| Rhodomicrobium          | 2              | 103            | 0      | 0      | 0      | 0      | 0      | 0      | 0      | 0      | 0      | 0      | 0      | 0      | 0      | 0      | 0      | 0      | 0      | 0      |
| Rhodopirellula          | 2              | 87             | 0      | 0      | 0      | 0      | 0      | 1      | 0      | 0      | 0      | 0      | 0      | 0      | 0      | 0      | 0      | 0      | 0      | 0      |
| Rhodopseudomonas        | 3              | 246            | 0      | 0      | 0      | 0      | 1      | 0      | 0      | 0      | 0      | 0      | 0      | 0      | 0      | 0      | 0      | 0      | 0      | 0      |
| Rhodospirillum          | 2              | 121            | 0      | 0      | 0      | 0      | 0      | 0      | 0      | 0      | 0      | 0      | 0      | 0      | 0      | 0      | 0      | 0      | 0      | 0      |
| Rhodothermus            | 2              | 76             | 0      | 0      | 0      | 0      | 1      | 0      | 0      | 0      | 0      | 0      | 0      | 0      | 0      | 0      | 0      | 0      | 0      | 0      |
| Rhodovulum              | 1              | 4              | 0      | 0      | 0      | 0      | 0      | 0      | 0      | 0      | 0      | 0      | 0      | 0      | 0      | 0      | 0      | 0      | 0      | 0      |
| Richelia                | 1              | 2              | 0      | 0      | 0      | 0      | 0      | 0      | 0      | 0      | 0      | 0      | 0      | 0      | 0      | 0      | 0      | 0      | 0      | 0      |
| Rickettsia              | 2              | 43             | 0      | 0      | 0      | 0      | 0      | 0      | 0      | 0      | 0      | 0      | 0      | 0      | 0      | 0      | 0      | 0      | 0      | 0      |
| Rickettsiaceae          | 1              | 5              | 0      | 0      | 0      | 0      | 0      | 0      | 0      | 0      | 0      | 0      | 0      | 0      | 0      | 0      | 0      | 0      | 0      | 0      |
| Riemerella              | 2              | 61             | 0      | 0      | 0      | 1      | 0      | 0      | 0      | 0      | 0      | 0      | 0      | 0      | 0      | 0      | 0      | 0      | 0      | 0      |
| Rivularia               | 1              | 18             | 0      | 0      | 0      | 0      | 0      | 0      | 0      | 0      | 0      | 0      | 0      | 0      | 0      | 0      | 0      | 0      | 0      | 0      |
| Robiginitalea           | 2              | 83             | 0      | 0      | 0      | 0      | 0      | 1      | 0      | 0      | 0      | 0      | 0      | 0      | 0      | 0      | 0      | 0      | 0      | 0      |
| Roseburia               | 2              | 58             | 0      | 0      | 0      | 0      | 0      | 0      | 0      | 0      | 0      | 0      | 0      | 0      | 0      | 0      | 0      | 0      | 0      | 0      |
| Roseibium               | 1              | 3              | 0      | 0      | 0      | 0      | 0      | 0      | 0      | 0      | 0      | 0      | 0      | 0      | 0      | 0      | 0      | 0      | 0      | 0      |
| Roseiflexus             | 3              | 100            | 0      | 0      | 0      | 0      | 1      | 0      | 0      | 0      | 0      | 0      | 0      | 0      | 0      | 0      | 0      | 0      | 0      | 0      |
| Roseobacter             | 2              | 149            | 0      | 0      | 0      | 0      | 0      | 0      | 0      | 0      | 0      | 0      | 0      | 0      | 0      | 0      | 0      | 0      | 0      | 0      |
| Roseomonas              | 1              | 2              | 0      | 0      | 0      | 0      | 0      | 0      | 0      | 0      | 0      | 0      | 0      | 0      | 0      | 0      | 0      | 0      | 0      | 0      |
| Roseovarius             | 1              | 15             | 0      | 0      | 0      | 0      | 0      | 0      | 0      | 0      | 0      | 0      | 0      | 0      | 0      | 0      | 0      | 0      | 0      | 0      |
| Rothia                  | 1              | 44             | 0      | 0      | 0      | 0      | 1      | 0      | 0      | 0      | 0      | 0      | 0      | 0      | 0      | 0      | 0      | 0      | 0      | 0      |
| Rubrivivax              | 1              | 24             | 0      | 0      | 0      | 0      | 0      | 0      | 0      | 0      | 0      | 0      | 0      | 0      | 0      | 0      | 0      | 0      | 0      | 0      |
| Rubrobacter             | 3              | 117            | 0      | 0      | 0      | 0      | 1      | 0      | 0      | 0      | 0      | 0      | 0      | 0      | 0      | 0      | 0      | 0      | 0      | 0      |
| Ruegeria                | 2              | 189            | 0      | 0      | 0      | 0      | 0      | 1      | 0      | 0      | 0      | 0      | 0      | 0      | 0      | 0      | 0      | 0      | 0      | 0      |

| Genus             | Cluster Number | Protein Counts | K11947 | K11948 | K11949 | K13421 | K13953 | K14519 | K14520 | K14579 | K14582 | K14583 | K14584 | K14746 | K14747 | K14748 | K14751 | K15054 | K15058 | K15060 |
|-------------------|----------------|----------------|--------|--------|--------|--------|--------|--------|--------|--------|--------|--------|--------|--------|--------|--------|--------|--------|--------|--------|
| Ruminococcaceae   | 1              | 2              | 0      | 0      | 0      | 0      | 0      | 0      | 0      | 0      | 0      | 0      | 0      | 0      | 0      | 0      | 0      | 0      | 0      | 0      |
| Ruminococcus      | 2              | 101            | 0      | 0      | 0      | 0      | 0      | 0      | 0      | 0      | 0      | 0      | 0      | 0      | 0      | 0      | 0      | 0      | 0      | 0      |
| Runella           | 1              | 26             | 0      | 0      | 0      | 0      | 0      | 1      | 0      | 0      | 0      | 0      | 0      | 0      | 0      | 0      | 0      | 0      | 0      | 0      |
| Saccharomonospora | 2              | 132            | 0      | 0      | 0      | 0      | 1      | 0      | 0      | 0      | 0      | 0      | 0      | 0      | 0      | 0      | 0      | 0      | 0      | 0      |
| Saccharophagus    | 2              | 81             | 0      | 0      | 0      | 0      | 0      | 0      | 0      | 0      | 0      | 0      | 0      | 0      | 0      | 0      | 0      | 0      | 0      | 0      |
| Saccharopolyspora | 3              | 194            | 0      | 0      | 0      | 0      | 1      | 1      | 0      | 0      | 0      | 0      | 0      | 0      | 0      | 0      | 0      | 0      | 0      | 0      |
| Saccharothrix     | 1              | 32             | 0      | 0      | 0      | 0      | 0      | 0      | 0      | 0      | 0      | 0      | 0      | 0      | 0      | 0      | 0      | 0      | 0      | 0      |
| Sagittula         | 1              | 10             | 0      | 0      | 0      | 0      | 0      | 0      | 0      | 0      | 0      | 0      | 0      | 0      | 0      | 0      | 0      | 0      | 0      | 0      |
| Salinibacter      | 2              | 77             | 0      | 0      | 0      | 0      | 1      | 0      | 0      | 0      | 0      | 0      | 0      | 0      | 0      | 0      | 0      | 0      | 0      | 0      |
| Salinimonas       | 1              | 1              | 0      | 0      | 0      | 0      | 0      | 0      | 0      | 0      | 0      | 0      | 0      | 0      | 0      | 0      | 0      | 0      | 0      | 0      |
| Salinispora       | 3              | 127            | 0      | 0      | 0      | 0      | 1      | 0      | 0      | 0      | 0      | 0      | 0      | 0      | 0      | 0      | 0      | 0      | 0      | 0      |
| Salinivibrio      | 1              | 2              | 0      | 0      | 0      | 0      | 0      | 0      | 0      | 0      | 0      | 0      | 0      | 0      | 0      | 0      | 0      | 0      | 0      | 0      |
| Salmonella        | 2              | 151            | 0      | 0      | 0      | 0      | 1      | 0      | 0      | 0      | 0      | 0      | 0      | 0      | 0      | 0      | 0      | 0      | 0      | 0      |
| Sanguibacter      | 2              | 73             | 0      | 0      | 0      | 0      | 1      | 0      | 0      | 0      | 0      | 0      | 0      | 0      | 0      | 0      | 0      | 0      | 0      | 0      |
| Saprospira        | 1              | 13             | 0      | 0      | 0      | 1      | 0      | 0      | 0      | 0      | 0      | 0      | 0      | 0      | 0      | 0      | 0      | 0      | 0      | 0      |
| Scardovia         | 1              | 1              | 0      | 0      | 0      | 0      | 0      | 0      | 0      | 0      | 0      | 0      | 0      | 0      | 0      | 0      | 0      | 0      | 0      | 0      |
| Scytonema         | 1              | 10             | 0      | 0      | 0      | 0      | 0      | 0      | 0      | 0      | 0      | 0      | 0      | 0      | 0      | 0      | 0      | 0      | 0      | 0      |
| Sebaldella        | 2              | 69             | 0      | 0      | 0      | 0      | 0      | 0      | 0      | 0      | 0      | 0      | 0      | 0      | 0      | 0      | 0      | 0      | 0      | 0      |
| Segniliparus      | 2              | 85             | 0      | 0      | 0      | 0      | 0      | 0      | 0      | 0      | 0      | 0      | 0      | 0      | 0      | 0      | 0      | 0      | 0      | 0      |
| Selenomonas       | 2              | 57             | 0      | 0      | 0      | 0      | 0      | 0      | 0      | 0      | 0      | 0      | 0      | 0      | 0      | 0      | 0      | 0      | 0      | 0      |
| Serinicoccus      | 1              | 1              | 0      | 0      | 0      | 0      | 0      | 0      | 0      | 0      | 0      | 0      | 0      | 0      | 0      | 0      | 0      | 0      | 0      | 0      |
| Serratia          | 2              | 186            | 0      | 0      | 0      | 0      | 1      | 1      | 0      | 0      | 0      | 0      | 0      | 0      | 0      | 0      | 0      | 1      | 0      | 0      |
| Shewanella        | 3              | 214            | 0      | 0      | 0      | 0      | 0      | 1      | 0      | 0      | 0      | 0      | 0      | 0      | 0      | 0      | 0      | 0      | 0      | 0      |
| Shigella          | 2              | 172            | 0      | 0      | 0      | 0      | 1      | 0      | 0      | 0      | 0      | 0      | 0      | 0      | 0      | 0      | 0      | 0      | 0      | 0      |
| Shinella          | 1              | 2              | 0      | 0      | 0      | 0      | 0      | 0      | 0      | 0      | 0      | 0      | 0      | 0      | 0      | 0      | 0      | 0      | 0      | 0      |
| Sideroxydans      | 2              | 81             | 0      | 0      | 0      | 0      | 0      | 0      | 0      | 0      | 0      | 0      | 0      | 0      | 0      | 0      | 0      | 0      | 0      | 0      |
| Silicibacter      | 2              | 105            | 0      | 0      | 0      | 0      | 0      | 1      | 0      | 0      | 0      | 0      | 0      | 0      | 0      | 0      | 0      | 0      | 0      | 0      |
| Simiduia          | 1              | 18             | 0      | 0      | 0      | 0      | 0      | 1      | 0      | 0      | 0      | 0      | 0      | 0      | 0      | 0      | 0      | 0      | 0      | 0      |
| Simkania          | 1              | 6              | 0      | 0      | 0      | 0      | 0      | 0      | 0      | 0      | 0      | 0      | 0      | 0      | 0      | 0      | 0      | 0      | 0      | 0      |
| Simonsiella       | 1              | 2              | 0      | 0      | 0      | 0      | 0      | 0      | 0      | 0      | 0      | 0      | 0      | 0      | 0      | 0      | 0      | 0      | 0      | 0      |
| Singulisphaera    | 1              | 18             | 0      | 0      | 0      | 0      | 1      | 0      | 0      | 0      | 0      | 0      | 0      | 0      | 0      | 0      | 0      | 0      | 0      | 0      |
| Sinorhizobium     | 3              | 207            | 0      | 0      | 0      | 0      | 1      | 1      | 1      | 0      | 0      | 0      | 0      | 0      | 0      | 0      | 0      | 0      | 0      | 0      |
| Slackia           | 2              | 46             | 0      | 0      | 0      | 0      | 0      | 0      | 0      | 0      | 0      | 0      | 0      | 0      | 0      | 0      | 0      | 0      | 0      | 0      |
| Smaragdicoccus    | 1              | 3              | 0      | 0      | 0      | 0      | 0      | 0      | 0      | 0      | 0      | 0      | 0      | 0      | 0      | 0      | 0      | 0      | 0      | 0      |
| Sodalis           | 2              | 71             | 0      | 0      | 0      | 0      | 0      | 0      | 0      | 0      | 0      | 0      | 0      | 0      | 0      | 0      | 0      | 0      | 0      | 0      |
| Solibacillus      | 1              | 23             | 0      | 0      | 0      | 0      | 1      | 0      | 0      | 0      | 0      | 0      | 0      | 0      | 0      | 0      | 0      | 0      | 0      | 0      |
| Solitaea          | 1              | 13             | 0      | 0      | 0      | 0      | 0      | 0      | 0      | 0      | 0      | 0      | 0      | 0      | 0      | 0      | 0      | 0      | 0      | 0      |
| Sorangium         | 3              | 115            | 0      | 0      | 0      | 0      | 1      | 1      | 0      | 0      | 0      | 0      | 0      | 0      | 0      | 0      | 0      | 0      | 0      | 0      |
| Sphaerobacter     | 2              | 100            | 0      | 0      | 0      | 0      | 0      | 0      | 0      | 0      | 0      | 0      | 0      | 0      | 0      | 0      | 0      | 0      | 0      | 0      |
| Sphaerochaeta     | 1              | 42             | 0      | 0      | 0      | 0      | 0      | 0      | 0      | 0      | 0      | 0      | 0      | 0      | 0      | 0      | 0      | 0      | 0      | 0      |
| Sphingobacterium  | 3              | 85             | 0      | 0      | 0      | 0      | 0      | 1      | 0      | 0      | 0      | 0      | 0      | 0      | 0      | 0      | 0      | 0      | 0      | 0      |
| Sphingobium       | 1              | 179            | 0      | 0      | 0      | 0      | 1      | 1      | 1      | 0      | 0      | 0      | 0      | 0      | 0      | 0      | 0      | 0      | 0      | 1      |
| Sphingomonadaceae | 1              | 15             | 0      | 0      | 0      | 0      | 1      | 0      | 1      | 0      | 0      | 0      | 0      | 0      | 0      | 0      | 0      | 0      | 0      | 0      |
| Sphingomonas      | 2              | 220            | 0      | 0      | 0      | 0      | 1      | 1      | 1      | 0      | 0      | 0      | 0      | 0      | 0      | 0      | 0      | 1      | 0      | 1      |
| Sphingopyxis      | 3              | 99             | 0      | 0      | 0      | 0      | 1      | 0      | 0      | 0      | 0      | 0      | 0      | 0      | 0      | 0      | 0      | 0      | 0      | 0      |
| Spirochaeta       | 2              | 103            | 0      | 0      | 1      | 1      | 0      | 0      | 0      | 0      | 0      | 0      | 0      | 0      | 0      | 0      | 0      | 0      | 0      | 0      |
| Spiroplasma       | 1              | 6              | 0      | 0      | 0      | 0      | 0      | 0      | 0      | 0      | 0      | 0      | 0      | 0      | 0      | 0      | 0      | 0      | 0      | 0      |
| Spirosoma         | 2              | 107            | 0      | 0      | 0      | 0      | 1      | 1      | 0      | 0      | 0      | 0      | 0      | 0      | 0      | 0      | 0      | 0      | 0      | 0      |
| Stackebrandtia    | 2              | 110            | 0      | 0      | 0      | 0      | 0      | 1      | 0      | 0      | 0      | 0      | 0      | 0      | 0      | 0      | 0      | 0      | 0      | 0      |
| Stanieria         | 1              | 17             | 0      | 0      | 0      | 1      | 1      | 0      | 0      | 0      | 0      | 0      | 0      | 0      | 0      | 0      | 0      | 0      | 0      | 0      |
| Staphylococcus    | 2              | 108            | 0      | 0      | 0      | 0      | 1      | 0      | 0      | 0      | 0      | 0      | 0      | 0      | 0      | 0      | 0      | 0      | 0      | 0      |
| Staphylothermus   | 1              | 12             | 0      | 0      | 0      | 0      | 1      | 0      | 0      | 0      | 0      | 0      | 0      | 0      | 0      | 0      | 0      | 0      | 0      | 0      |

| Genus                  | Cluster Number | Protein Counts | K11947 | K11948 | K11949 | K13421 | K13953 | K14519 | K14520 | K14579 | K14582 | K14583 | K14584 | K14746 | K14747 | K14748 | K14751 | K15054 | K15058 | K15060 |
|------------------------|----------------|----------------|--------|--------|--------|--------|--------|--------|--------|--------|--------|--------|--------|--------|--------|--------|--------|--------|--------|--------|
| Stappia                | 1              | 2              | 0      | 0      | 0      | 0      | 0      | 0      | 0      | 0      | 0      | 0      | 0      | 0      | 0      | 0      | 0      | 0      | 0      | 0      |
| Starkeya               | 3              | 134            | 0      | 0      | 0      | 0      | 1      | 0      | 0      | 0      | 0      | 0      | 0      | 0      | 0      | 0      | 0      | 1      | 0      | 0      |
| Stenotrophomonas       | 3              | 104            | 0      | 0      | 0      | 0      | 1      | 0      | 0      | 0      | 0      | 0      | 0      | 0      | 0      | 0      | 0      | 0      | 0      | 0      |
| Stigmatella            | 3              | 129            | 0      | 0      | 0      | 0      | 1      | 0      | 0      | 0      | 0      | 0      | 0      | 0      | 0      | 0      | 0      | 0      | 0      | 0      |
| Streptobacillus        | 1              | 38             | 0      | 0      | 0      | 0      | 1      | 0      | 0      | 0      | 0      | 0      | 0      | 0      | 0      | 0      | 0      | 0      | 0      | 0      |
| Streptococcus          | 2              | 121            | 0      | 0      | 0      | 0      | 1      | 0      | 0      | 0      | 0      | 0      | 0      | 0      | 0      | 0      | 0      | 0      | 0      | 0      |
| Streptomyces           | 2              | 253            | 0      | 0      | 0      | 0      | 1      | 1      | 0      | 0      | 0      | 0      | 0      | 0      | 0      | 0      | 0      | 0      | 0      | 0      |
| Streptosporangium      | 3              | 148            | 0      | 0      | 0      | 0      | 1      | 1      | 0      | 0      | 0      | 0      | 0      | 0      | 0      | 0      | 0      | 0      | 0      | 0      |
| Strigomonas            | 1              | 2              | 0      | 0      | 0      | 0      | 0      | 0      | 0      | 0      | 0      | 0      | 0      | 0      | 0      | 0      | 0      | 0      | 0      | 0      |
| Sulfitobacter          | 1              | 10             | 0      | 0      | 0      | 0      | 0      | 0      | 0      | 0      | 0      | 0      | 0      | 0      | 0      | 0      | 0      | 0      | 0      | 0      |
| Sulfobacillus          | 1              | 30             | 0      | 0      | 0      | 0      | 1      | 0      | 0      | 0      | 0      | 0      | 0      | 0      | 0      | 0      | 0      | 0      | 0      | 0      |
| Sulfolobus             | 1              | 23             | 0      | 0      | 0      | 0      | 1      | 0      | 0      | 0      | 0      | 0      | 0      | 0      | 0      | 0      | 0      | 0      | 0      | 0      |
| Sulfuricurvum          | 2              | 67             | 0      | 0      | 0      | 0      | 0      | 0      | 0      | 0      | 0      | 0      | 0      | 0      | 0      | 0      | 0      | 0      | 0      | 0      |
| Sulfurihydrogenibium   | 2              | 55             | 0      | 0      | 0      | 0      | 0      | 0      | 0      | 0      | 0      | 0      | 0      | 0      | 0      | 0      | 0      | 0      | 0      | 0      |
| Sulfurimonas           | 2              | 60             | 0      | 0      | 0      | 0      | 0      | 0      | 0      | 0      | 0      | 0      | 0      | 0      | 0      | 0      | 0      | 0      | 0      | 0      |
| Sulfurospirillum       | 1              | 48             | 0      | 0      | 0      | 0      | 0      | 0      | 0      | 0      | 0      | 0      | 0      | 0      | 0      | 0      | 0      | 0      | 0      | 0      |
| Sulfurovum             | 2              | 48             | 0      | 0      | 0      | 0      | 0      | 0      | 0      | 0      | 0      | 0      | 0      | 0      | 0      | 0      | 0      | 0      | 0      | 0      |
| Symbiobacterium        | 2              | 68             | 0      | 0      | 0      | 0      | 0      | 0      | 0      | 0      | 0      | 0      | 0      | 0      | 0      | 0      | 0      | 0      | 0      | 0      |
| Synechococcus          | 1              | 34             | 0      | 0      | 0      | 1      | 0      | 0      | 0      | 0      | 0      | 0      | 0      | 0      | 0      | 0      | 0      | 0      | 0      | 0      |
| Synechocystis          | 1              | 40             | 0      | 0      | 0      | 0      | 0      | 0      | 0      | 0      | 0      | 0      | 0      | 0      | 0      | 0      | 0      | 0      | 0      | 0      |
| Synergistetes          | 1              | 27             | 0      | 0      | 0      | 0      | 0      | 0      | 0      | 0      | 0      | 0      | 0      | 0      | 0      | 0      | 0      | 0      | 0      | 0      |
| Syntrophobacter        | 2              | 101            | 0      | 0      | 0      | 0      | 1      | 0      | 0      | 0      | 0      | 0      | 0      | 0      | 0      | 0      | 0      | 0      | 0      | 0      |
| Syntrophobotulus       | 2              | 71             | 0      | 0      | 0      | 0      | 0      | 0      | 0      | 0      | 0      | 0      | 0      | 0      | 0      | 0      | 0      | 0      | 0      | 0      |
| Syntrophomonas         | 2              | 58             | 0      | 0      | 0      | 0      | 0      | 0      | 0      | 0      | 0      | 0      | 0      | 0      | 0      | 0      | 0      | 0      | 0      | 0      |
| Syntrophothermus       | 2              | 60             | 0      | 0      | 0      | 0      | 0      | 0      | 0      | 0      | 0      | 0      | 0      | 0      | 0      | 0      | 0      | 0      | 0      | 0      |
| Syntrophus             | 2              | 66             | 0      | 0      | 0      | 0      | 1      | 0      | 0      | 0      | 0      | 0      | 0      | 0      | 0      | 0      | 0      | 0      | 0      | 0      |
| Tannerella             | 1              | 8              | 0      | 0      | 0      | 0      | 0      | 0      | 0      | 0      | 0      | 0      | 0      | 0      | 0      | 0      | 0      | 0      | 0      | 0      |
| Taylorella             | 1              | 43             | 0      | 0      | 0      | 0      | 0      | 0      | 0      | 0      | 0      | 0      | 0      | 0      | 0      | 0      | 0      | 0      | 0      | 0      |
| Tepidanaerobacter      | 2              | 55             | 0      | 0      | 0      | 0      | 0      | 0      | 0      | 0      | 0      | 0      | 0      | 0      | 0      | 0      | 0      | 0      | 0      | 0      |
| Teredinibacter         | 2              | 109            | 0      | 0      | 0      | 0      | 0      | 1      | 0      | 0      | 0      | 0      | 0      | 0      | 0      | 0      | 0      | 0      | 0      | 0      |
| Terrabacter            | 1              | 1              | 0      | 0      | 0      | 0      | 0      | 0      | 0      | 0      | 0      | 0      | 0      | 0      | 0      | 0      | 0      | 0      | 0      | 0      |
| Terriglobus            | 2              | 83             | 0      | 0      | 0      | 0      | 1      | 1      | 0      | 0      | 0      | 0      | 0      | 0      | 0      | 0      | 0      | 0      | 0      | 0      |
| Tetragenococcus        | 1              | 12             | 0      | 0      | 0      | 0      | 0      | 0      | 0      | 0      | 0      | 0      | 0      | 0      | 0      | 0      | 0      | 0      | 0      | 0      |
| Thalassiobium          | 1              | 11             | 0      | 0      | 0      | 0      | 0      | 0      | 0      | 0      | 0      | 0      | 0      | 0      | 0      | 0      | 0      | 0      | 0      | 0      |
| Thalassobacter         | 1              | 9              | 0      | 0      | 0      | 0      | 0      | 0      | 0      | 0      | 0      | 0      | 0      | 0      | 0      | 0      | 0      | 0      | 0      | 0      |
| Thalassolituus         | 1              | 12             | 0      | 0      | 0      | 0      | 0      | 0      | 0      | 0      | 0      | 0      | 0      | 0      | 0      | 0      | 0      | 0      | 0      | 0      |
| Thalassospira          | 1              | 2              | 0      | 0      | 0      | 0      | 0      | 0      | 0      | 0      | 0      | 0      | 0      | 0      | 0      | 0      | 0      | 0      | 0      | 0      |
| Thauera                | 1              | 111            | 0      | 0      | 0      | 0      | 1      | 0      | 0      | 0      | 0      | 0      | 0      | 0      | 0      | 0      | 0      | 1      | 0      | 0      |
| Thermacetogenium       | 1              | 7              | 0      | 0      | 0      | 0      | 0      | 0      | 0      | 0      | 0      | 0      | 0      | 0      | 0      | 0      | 0      | 0      | 0      | 0      |
| Thermaerobacter        | 2              | 79             | 0      | 0      | 0      | 0      | 1      | 0      | 0      | 0      | 0      | 0      | 0      | 0      | 0      | 0      | 0      | 0      | 0      | 0      |
| Thermanaerovibrio      | 2              | 58             | 0      | 0      | 0      | 0      | 0      | 0      | 0      | 0      | 0      | 0      | 0      | 0      | 0      | 0      | 0      | 0      | 0      | 0      |
| Thermincola            | 2              | 62             | 0      | 0      | 0      | 0      | 0      | 0      | 0      | 0      | 0      | 0      | 0      | 0      | 0      | 0      | 0      | 0      | 0      | 0      |
| Thermoanaerobacter     | 2              | 76             | 0      | 0      | 0      | 0      | 0      | 0      | 0      | 0      | 0      | 0      | 0      | 0      | 0      | 0      | 0      | 0      | 0      | 0      |
| Thermoanaerobacterium  | 2              | 64             | 0      | 0      | 0      | 0      | 0      | 0      | 0      | 0      | 0      | 0      | 0      | 0      | 0      | 0      | 0      | 0      | 0      | 0      |
| Thermobacillus         | 1              | 11             | 0      | 0      | 0      | 0      | 0      | 0      | 0      | 0      | 0      | 0      | 0      | 0      | 0      | 0      | 0      | 0      | 0      | 0      |
| Thermobaculum          | 2              | 62             | 0      | 0      | 0      | 0      | 1      | 0      | 0      | 0      | 0      | 0      | 0      | 0      | 0      | 0      | 0      | 0      | 0      | 0      |
| Thermobifida           | 2              | 72             | 0      | 0      | 0      | 0      | 1      | 1      | 0      | 0      | 0      | 0      | 0      | 0      | 0      | 0      | 0      | 0      | 0      | 0      |
| Thermobispora          | 2              | 109            | 0      | 0      | 0      | 0      | 1      | 1      | 0      | 0      | 0      | 0      | 0      | 0      | 0      | 0      | 0      | 0      | 0      | 0      |
| Thermococcus           | 1              | 13             | 0      | 0      | 0      | 0      | 0      | 0      | 0      | 0      | 0      | 0      | 0      | 0      | 0      | 0      | 0      | 0      | 0      | 0      |
| Thermocrinis           | 2              | 60             | 0      | 0      | 0      | 0      | 0      | 0      | 0      | 0      | 0      | 0      | 0      | 0      | 0      | 0      | 0      | 0      | 0      | 0      |
| Thermodesulfator       | 1              | 10             | 0      | 0      | 0      | 0      | 0      | 0      | 0      | 0      | 0      | 0      | 0      | 0      | 0      | 0      | 0      | 0      | 0      | 0      |
| Thermodesulfobacterium | 1              | 9              | 0      | 0      | 0      | 0      | 1      | 0      | 0      | 0      | 0      | 0      | 0      | 0      | 0      | 0      | 0      | 0      | 0      | 0      |



| Genus                       | Cluster Number | Protein Counts | K11947 | K11948 | K11949 | K13421 | K13953 | K14519 | K14520 | K14579 | K14582 | K14583 | K14584 | K14746 | K14747 | K14748 | K14751 | K15054 | K15058 | K15060 |
|-----------------------------|----------------|----------------|--------|--------|--------|--------|--------|--------|--------|--------|--------|--------|--------|--------|--------|--------|--------|--------|--------|--------|
| <b>Thermodesulfobium</b>    | 1              | 13             | 0      | 0      | 0      | 0      | 1      | 0      | 0      | 0      | 0      | 0      | 0      | 0      | 0      | 0      | 0      | 0      | 0      | 0      |
| <b>Thermodesulfovibrio</b>  | 2              | 60             | 0      | 0      | 0      | 0      | 1      | 0      | 0      | 0      | 0      | 0      | 0      | 0      | 0      | 0      | 0      | 0      | 0      | 0      |
| <b>Thermofilum</b>          | 1              | 9              | 0      | 0      | 0      | 0      | 0      | 0      | 0      | 0      | 0      | 0      | 0      | 0      | 0      | 0      | 0      | 0      | 0      | 0      |
| <b>Thermogladus</b>         | 1              | 7              | 0      | 0      | 0      | 0      | 0      | 0      | 0      | 0      | 0      | 0      | 0      | 0      | 0      | 0      | 0      | 0      | 0      | 0      |
| <b>Thermomicrobium</b>      | 2              | 92             | 0      | 0      | 0      | 0      | 1      | 0      | 0      | 0      | 0      | 0      | 0      | 0      | 0      | 0      | 0      | 0      | 0      | 0      |
| <b>Thermomonospora</b>      | 2              | 125            | 0      | 0      | 0      | 0      | 1      | 0      | 0      | 0      | 0      | 0      | 0      | 0      | 0      | 0      | 0      | 0      | 0      | 0      |
| <b>Thermoplasma</b>         | 1              | 11             | 0      | 0      | 0      | 0      | 0      | 0      | 0      | 0      | 0      | 0      | 0      | 0      | 0      | 0      | 0      | 0      | 0      | 0      |
| <b>Thermoplasmatales</b>    | 1              | 6              | 0      | 0      | 0      | 0      | 0      | 0      | 0      | 0      | 0      | 0      | 0      | 0      | 0      | 0      | 0      | 0      | 0      | 0      |
| <b>Thermoproteus</b>        | 1              | 12             | 0      | 0      | 0      | 0      | 1      | 0      | 0      | 0      | 0      | 0      | 0      | 0      | 0      | 0      | 0      | 0      | 0      | 0      |
| <b>Thermosediminibacter</b> | 2              | 64             | 0      | 0      | 0      | 0      | 0      | 0      | 0      | 0      | 0      | 0      | 0      | 0      | 0      | 0      | 0      | 0      | 0      | 0      |
| <b>Thermosipho</b>          | 2              | 70             | 0      | 0      | 0      | 0      | 0      | 0      | 0      | 0      | 0      | 0      | 0      | 0      | 0      | 0      | 0      | 0      | 0      | 0      |
| <b>Thermosphaera</b>        | 1              | 10             | 0      | 0      | 0      | 0      | 1      | 0      | 0      | 0      | 0      | 0      | 0      | 0      | 0      | 0      | 0      | 0      | 0      | 0      |
| <b>Thermosynechococcus</b>  | 1              | 6              | 0      | 0      | 0      | 0      | 0      | 0      | 0      | 0      | 0      | 0      | 0      | 0      | 0      | 0      | 0      | 0      | 0      | 0      |
| <b>Thermotoga</b>           | 2              | 80             | 0      | 0      | 0      | 0      | 0      | 0      | 0      | 0      | 0      | 0      | 0      | 0      | 0      | 0      | 0      | 0      | 0      | 0      |
| <b>Thermovibrio</b>         | 2              | 58             | 0      | 0      | 0      | 0      | 0      | 0      | 0      | 0      | 0      | 0      | 0      | 0      | 0      | 0      | 0      | 0      | 0      | 0      |
| <b>Thermovirga</b>          | 1              | 9              | 0      | 0      | 0      | 0      | 0      | 0      | 0      | 0      | 0      | 0      | 0      | 0      | 0      | 0      | 0      | 0      | 0      | 0      |
| <b>Thermus</b>              | 2              | 107            | 0      | 0      | 0      | 0      | 1      | 0      | 0      | 0      | 0      | 0      | 0      | 0      | 0      | 0      | 0      | 0      | 0      | 0      |
| <b>Thioalkalimicrobium</b>  | 1              | 4              | 0      | 0      | 0      | 0      | 0      | 0      | 0      | 0      | 0      | 0      | 0      | 0      | 0      | 0      | 0      | 0      | 0      | 0      |
| <b>Thioalkalivibrio</b>     | 2              | 91             | 0      | 0      | 0      | 0      | 0      | 0      | 0      | 0      | 0      | 0      | 0      | 0      | 0      | 0      | 0      | 0      | 0      | 0      |
| <b>Thiobaca</b>             | 1              | 2              | 0      | 0      | 0      | 0      | 0      | 0      | 0      | 0      | 0      | 0      | 0      | 0      | 0      | 0      | 0      | 0      | 0      | 0      |
| <b>Thiobacillus</b>         | 2              | 67             | 0      | 0      | 0      | 0      | 0      | 0      | 0      | 0      | 0      | 0      | 0      | 0      | 0      | 0      | 0      | 0      | 0      | 0      |
| <b>Thiocapsa</b>            | 1              | 2              | 0      | 0      | 0      | 0      | 0      | 0      | 0      | 0      | 0      | 0      | 0      | 0      | 0      | 0      | 0      | 0      | 0      | 0      |
| <b>Thiocystis</b>           | 1              | 11             | 0      | 0      | 0      | 0      | 0      | 0      | 0      | 0      | 0      | 0      | 0      | 0      | 0      | 0      | 0      | 0      | 0      | 0      |
| <b>Thioflavococcus</b>      | 1              | 13             | 0      | 0      | 0      | 0      | 1      | 0      | 0      | 0      | 0      | 0      | 0      | 0      | 0      | 0      | 0      | 0      | 0      | 0      |
| <b>Thiomicrospira</b>       | 2              | 50             | 0      | 0      | 0      | 0      | 0      | 0      | 0      | 0      | 0      | 0      | 0      | 0      | 0      | 0      | 0      | 0      | 0      | 0      |
| <b>Thiomonas</b>            | 2              | 85             | 0      | 0      | 0      | 0      | 0      | 0      | 0      | 0      | 0      | 0      | 0      | 0      | 0      | 0      | 0      | 0      | 0      | 0      |
| <b>Thiorhodococcus</b>      | 1              | 2              | 0      | 0      | 0      | 0      | 0      | 0      | 0      | 0      | 0      | 0      | 0      | 0      | 0      | 0      | 0      | 0      | 0      | 0      |
| <b>Thiothrix</b>            | 1              | 2              | 0      | 0      | 0      | 0      | 0      | 0      | 0      | 0      | 0      | 0      | 0      | 0      | 0      | 0      | 0      | 0      | 0      | 0      |
| <b>Tistrella</b>            | 1              | 42             | 0      | 0      | 0      | 0      | 1      | 1      | 1      | 0      | 0      | 0      | 0      | 0      | 0      | 0      | 0      | 0      | 0      | 0      |
| <b>Tolumonas</b>            | 2              | 100            | 0      | 0      | 0      | 0      | 0      | 0      | 0      | 0      | 0      | 0      | 0      | 0      | 0      | 0      | 0      | 0      | 0      | 0      |
| <b>Transposon</b>           | 1              | 2              | 0      | 0      | 0      | 0      | 0      | 0      | 0      | 0      | 0      | 0      | 0      | 0      | 0      | 0      | 0      | 0      | 0      | 0      |
| <b>Treponema</b>            | 1              | 63             | 0      | 0      | 0      | 0      | 0      | 0      | 0      | 0      | 0      | 0      | 0      | 0      | 0      | 0      | 0      | 0      | 0      | 0      |
| <b>Trichodesmium</b>        | 2              | 71             | 0      | 0      | 0      | 1      | 0      | 0      | 0      | 0      | 0      | 0      | 0      | 0      | 0      | 0      | 0      | 0      | 0      | 0      |
| <b>Trichormus</b>           | 1              | 12             | 0      | 0      | 0      | 0      | 0      | 0      | 0      | 0      | 0      | 0      | 0      | 0      | 0      | 0      | 0      | 0      | 0      | 0      |
| <b>Tropheryma</b>           | 2              | 22             | 0      | 0      | 0      | 0      | 0      | 0      | 0      | 0      | 0      | 0      | 0      | 0      | 0      | 0      | 0      | 0      | 0      | 0      |
| <b>Truepera</b>             | 2              | 104            | 0      | 0      | 0      | 0      | 1      | 0      | 0      | 0      | 0      | 0      | 0      | 0      | 0      | 0      | 0      | 0      | 0      | 0      |
| <b>Tsukamurella</b>         | 2              | 123            | 0      | 0      | 0      | 0      | 0      | 0      | 0      | 0      | 0      | 0      | 0      | 0      | 0      | 0      | 0      | 0      | 0      | 0      |
| <b>Turneriella</b>          | 1              | 16             | 0      | 0      | 0      | 0      | 0      | 0      | 0      | 0      | 0      | 0      | 0      | 0      | 0      | 0      | 0      | 0      | 0      | 0      |
| <b>Uliginosibacterium</b>   | 1              | 2              | 0      | 0      | 0      | 0      | 0      | 0      | 0      | 0      | 0      | 0      | 0      | 0      | 0      | 0      | 0      | 0      | 0      | 0      |
| <b>Ureaplasma</b>           | 1              | 24             | 0      | 0      | 0      | 0      | 0      | 0      | 0      | 0      | 0      | 0      | 0      | 0      | 0      | 0      | 0      | 0      | 0      | 0      |
| <b>Ureibacillus</b>         | 1              | 2              | 0      | 0      | 0      | 0      | 0      | 0      | 0      | 0      | 0      | 0      | 0      | 0      | 0      | 0      | 0      | 0      | 0      | 0      |
| <b>Variovorax</b>           | 3              | 187            | 0      | 0      | 0      | 0      | 0      | 0      | 0      | 0      | 0      | 0      | 0      | 0      | 0      | 0      | 0      | 1      | 0      | 1      |
| <b>Veillonella</b>          | 1              | 54             | 0      | 0      | 0      | 0      | 0      | 0      | 0      | 0      | 0      | 0      | 0      | 0      | 0      | 0      | 0      | 0      | 0      | 0      |
| <b>Verminephrobacter</b>    | 3              | 188            | 0      | 0      | 0      | 0      | 1      | 0      | 0      | 0      | 0      | 0      | 0      | 0      | 0      | 0      | 0      | 0      | 0      | 0      |
| <b>Verrucosispora</b>       | 3              | 126            | 0      | 0      | 0      | 0      | 1      | 0      | 0      | 0      | 0      | 0      | 0      | 0      | 0      | 0      | 0      | 0      | 1      | 0      |
| <b>Vibrio</b>               | 2              | 195            | 0      | 0      | 0      | 0      | 0      | 1      | 0      | 0      | 0      | 0      | 0      | 0      | 0      | 0      | 0      | 0      | 0      | 0      |
| <b>Vibrionales</b>          | 1              | 46             | 0      | 0      | 0      | 0      | 0      | 0      | 0      | 0      | 0      | 0      | 0      | 0      | 0      | 0      | 0      | 0      | 0      | 0      |
| <b>Vitreoscilla</b>         | 1              | 1              | 0      | 0      | 0      | 0      | 0      | 0      | 0      | 0      | 0      | 0      | 0      | 0      | 0      | 0      | 0      | 0      | 0      | 0      |
| <b>Vulcanisaeta</b>         | 1              | 14             | 0      | 0      | 0      | 0      | 1      | 0      | 0      | 0      | 0      | 0      | 0      | 0      | 0      | 0      | 0      | 0      | 0      | 0      |
| <b>Waddlia</b>              | 2              | 68             | 0      | 0      | 0      | 1      | 0      | 0      | 0      | 0      | 0      | 0      | 0      | 0      | 0      | 0      | 0      | 0      | 0      | 0      |
| <b>Wautersia</b>            | 1              | 2              | 0      | 0      | 0      | 0      | 0      | 0      | 0      | 0      | 0      | 0      | 0      | 0      | 0      | 0      | 0      | 0      | 0      | 0      |
| <b>Weeksella</b>            | 2              | 65             | 0      | 0      | 0      | 1      | 0      | 0      | 0      | 0      | 0      | 0      | 0      | 0      | 0      | 0      | 0      | 0      | 0      | 0      |

| Genus             | Cluster Number | Protein Counts | K11947 | K11948 | K11949 | K13421 | K13953 | K14519 | K14520 | K14579 | K14582 | K14583 | K14584 | K14746 | K14747 | K14748 | K14751 | K15054 | K15058 | K15060 |
|-------------------|----------------|----------------|--------|--------|--------|--------|--------|--------|--------|--------|--------|--------|--------|--------|--------|--------|--------|--------|--------|--------|
| Weissella         | 1              | 14             | 0      | 0      | 0      | 0      | 1      | 0      | 0      | 0      | 0      | 0      | 0      | 0      | 0      | 0      | 0      | 0      | 0      | 0      |
| Wenxinia          | 1              | 2              | 0      | 0      | 0      | 0      | 0      | 0      | 0      | 0      | 0      | 0      | 0      | 0      | 0      | 0      | 0      | 0      | 0      | 0      |
| Wigglesworthia    | 1              | 29             | 0      | 0      | 0      | 0      | 0      | 0      | 0      | 0      | 0      | 0      | 0      | 0      | 0      | 0      | 0      | 0      | 0      | 0      |
| Wolbachia         | 1              | 32             | 0      | 0      | 0      | 0      | 0      | 0      | 0      | 0      | 0      | 0      | 0      | 0      | 0      | 0      | 0      | 0      | 0      | 0      |
| Wolinella         | 2              | 51             | 0      | 0      | 0      | 0      | 0      | 0      | 0      | 0      | 0      | 0      | 0      | 0      | 0      | 0      | 0      | 0      | 0      | 0      |
| Xanthobacter      | 3              | 176            | 0      | 0      | 0      | 0      | 1      | 1      | 0      | 0      | 0      | 0      | 0      | 0      | 0      | 0      | 0      | 0      | 0      | 0      |
| Xanthobacteraceae | 1              | 4              | 0      | 0      | 0      | 0      | 0      | 0      | 0      | 0      | 0      | 0      | 0      | 0      | 0      | 0      | 0      | 0      | 0      | 0      |
| Xanthomonadaceae  | 1              | 39             | 0      | 0      | 0      | 0      | 0      | 0      | 0      | 0      | 0      | 0      | 0      | 0      | 0      | 0      | 0      | 0      | 0      | 0      |
| Xanthomonas       | 2              | 162            | 0      | 0      | 0      | 0      | 1      | 1      | 0      | 0      | 0      | 0      | 0      | 0      | 0      | 0      | 0      | 0      | 0      | 0      |
| Xenorhabdus       | 2              | 127            | 0      | 0      | 0      | 0      | 0      | 0      | 0      | 0      | 0      | 0      | 0      | 0      | 0      | 0      | 0      | 0      | 0      | 0      |
| Xylanimonas       | 2              | 66             | 0      | 0      | 0      | 0      | 0      | 0      | 0      | 0      | 0      | 0      | 0      | 0      | 0      | 0      | 0      | 0      | 0      | 0      |
| Xylella           | 2              | 52             | 0      | 0      | 0      | 0      | 0      | 0      | 0      | 0      | 0      | 0      | 0      | 0      | 0      | 0      | 0      | 0      | 0      | 0      |
| Yersinia          | 2              | 145            | 0      | 0      | 0      | 0      | 0      | 0      | 0      | 0      | 0      | 0      | 0      | 0      | 0      | 0      | 0      | 0      | 0      | 0      |
| Yokenella         | 2              | 61             | 0      | 0      | 0      | 0      | 0      | 0      | 0      | 0      | 0      | 0      | 0      | 0      | 0      | 0      | 0      | 0      | 0      | 0      |
| Zobellia          | 1              | 28             | 0      | 0      | 0      | 0      | 0      | 1      | 0      | 0      | 0      | 0      | 0      | 0      | 0      | 0      | 0      | 0      | 0      | 0      |
| Zunongwangia      | 2              | 98             | 0      | 0      | 0      | 0      | 1      | 1      | 0      | 0      | 0      | 0      | 0      | 0      | 0      | 0      | 0      | 0      | 0      | 0      |
| Zymomonas         | 2              | 67             | 0      | 0      | 0      | 0      | 1      | 0      | 0      | 0      | 0      | 0      | 0      | 0      | 0      | 0      | 0      | 0      | 0      | 0      |
| Zymophilus        | 1              | 2              | 0      | 0      | 0      | 0      | 0      | 0      | 0      | 0      | 0      | 0      | 0      | 0      | 0      | 0      | 0      | 0      | 0      | 0      |

| Genus               | Cluster Number | Protein Counts | K15061 | K15062 | K15063 | K15064 | K15065 | K15066 | K15236 | K15237 | K15238 | K15242 | K15247 | K15253 | K15749 | K15751 | K15754 | K15756 | K15757 | K15981 |
|---------------------|----------------|----------------|--------|--------|--------|--------|--------|--------|--------|--------|--------|--------|--------|--------|--------|--------|--------|--------|--------|--------|
| Acaricomes          | 1              | 2              | 0      | 0      | 0      | 0      | 0      | 0      | 0      | 0      | 0      | 0      | 0      | 0      | 0      | 0      | 0      | 0      | 0      | 0      |
| Acaryochloris       | 2              | 88             | 0      | 0      | 0      | 0      | 0      | 0      | 0      | 0      | 0      | 0      | 0      | 0      | 0      | 0      | 0      | 0      | 0      | 0      |
| Acetivibrio         | 1              | 2              | 0      | 0      | 0      | 0      | 0      | 0      | 0      | 0      | 0      | 0      | 0      | 0      | 0      | 0      | 0      | 0      | 0      | 0      |
| Acetobacter         | 2              | 85             | 0      | 0      | 0      | 0      | 0      | 0      | 0      | 0      | 0      | 0      | 0      | 0      | 0      | 0      | 0      | 0      | 0      | 0      |
| Acetobacteraceae    | 1              | 2              | 0      | 0      | 0      | 0      | 0      | 0      | 0      | 0      | 0      | 0      | 0      | 0      | 0      | 0      | 0      | 0      | 0      | 0      |
| Acetobacterium      | 1              | 8              | 0      | 0      | 0      | 0      | 0      | 0      | 0      | 0      | 0      | 0      | 0      | 0      | 0      | 0      | 0      | 0      | 0      | 0      |
| Acetohalobium       | 2              | 79             | 0      | 0      | 0      | 0      | 0      | 0      | 0      | 0      | 0      | 0      | 0      | 0      | 0      | 0      | 0      | 0      | 0      | 0      |
| Acholeplasma        | 2              | 38             | 0      | 0      | 0      | 0      | 0      | 0      | 0      | 0      | 0      | 0      | 0      | 0      | 0      | 0      | 0      | 0      | 0      | 0      |
| Achromobacter       | 2              | 192            | 0      | 0      | 0      | 0      | 0      | 0      | 0      | 0      | 0      | 0      | 0      | 1      | 0      | 0      | 0      | 0      | 0      | 0      |
| Acidaminococcus     | 1              | 65             | 0      | 0      | 0      | 0      | 0      | 0      | 0      | 0      | 0      | 0      | 0      | 0      | 0      | 0      | 0      | 0      | 0      | 0      |
| Acidianus           | 1              | 9              | 0      | 0      | 0      | 0      | 0      | 0      | 0      | 0      | 0      | 0      | 0      | 0      | 0      | 0      | 0      | 0      | 0      | 0      |
| Acidilobus          | 1              | 8              | 0      | 0      | 0      | 0      | 0      | 0      | 0      | 0      | 0      | 0      | 0      | 0      | 0      | 0      | 0      | 0      | 0      | 0      |
| Acidimicrobium      | 2              | 58             | 0      | 0      | 0      | 0      | 0      | 0      | 0      | 0      | 0      | 0      | 0      | 0      | 0      | 0      | 0      | 0      | 0      | 0      |
| Acidiphilium        | 3              | 144            | 0      | 0      | 0      | 0      | 0      | 0      | 0      | 0      | 0      | 0      | 0      | 0      | 0      | 0      | 0      | 0      | 0      | 0      |
| Acidithiobacillus   | 2              | 70             | 0      | 0      | 0      | 0      | 0      | 0      | 0      | 0      | 0      | 0      | 0      | 0      | 0      | 0      | 0      | 0      | 0      | 0      |
| Acidobacterium      | 2              | 91             | 0      | 0      | 0      | 0      | 0      | 0      | 0      | 0      | 0      | 0      | 0      | 0      | 0      | 0      | 0      | 0      | 0      | 0      |
| Acidocella          | 1              | 2              | 0      | 0      | 0      | 0      | 0      | 0      | 0      | 0      | 0      | 0      | 0      | 0      | 0      | 0      | 0      | 0      | 0      | 0      |
| Acidothermus        | 2              | 68             | 0      | 0      | 0      | 0      | 0      | 0      | 0      | 0      | 0      | 0      | 0      | 0      | 0      | 0      | 0      | 0      | 0      | 0      |
| Acidovorax          | 3              | 217            | 0      | 0      | 0      | 0      | 0      | 0      | 0      | 0      | 0      | 0      | 0      | 0      | 0      | 0      | 0      | 0      | 0      | 0      |
| Aciduliprofundum    | 1              | 11             | 0      | 0      | 0      | 0      | 0      | 0      | 0      | 0      | 0      | 0      | 0      | 0      | 0      | 0      | 0      | 0      | 0      | 0      |
| Acinetobacter       | 3              | 188            | 0      | 0      | 0      | 0      | 0      | 0      | 0      | 0      | 0      | 0      | 0      | 0      | 0      | 0      | 0      | 0      | 0      | 0      |
| Actinobacillus      | 2              | 112            | 0      | 0      | 0      | 0      | 0      | 0      | 0      | 0      | 0      | 0      | 0      | 0      | 0      | 0      | 0      | 0      | 0      | 0      |
| Actinomadura        | 1              | 1              | 0      | 0      | 0      | 0      | 0      | 0      | 0      | 0      | 0      | 0      | 0      | 0      | 0      | 0      | 0      | 0      | 0      | 0      |
| Actinoplanes        | 1              | 52             | 0      | 0      | 0      | 0      | 0      | 0      | 0      | 0      | 0      | 0      | 0      | 0      | 0      | 0      | 0      | 0      | 0      | 1      |
| Actinopolyspora     | 1              | 2              | 0      | 0      | 0      | 0      | 0      | 0      | 0      | 0      | 0      | 0      | 0      | 0      | 0      | 0      | 0      | 0      | 0      | 0      |
| Actinosynnema       | 2              | 122            | 0      | 0      | 0      | 0      | 0      | 0      | 0      | 0      | 0      | 0      | 0      | 0      | 0      | 0      | 0      | 0      | 0      | 0      |
| Advenella           | 1              | 30             | 0      | 0      | 0      | 0      | 0      | 0      | 0      | 0      | 0      | 0      | 0      | 0      | 0      | 0      | 0      | 0      | 0      | 0      |
| Aequorivita         | 1              | 12             | 0      | 0      | 0      | 0      | 0      | 0      | 0      | 0      | 0      | 0      | 0      | 0      | 0      | 0      | 0      | 0      | 0      | 0      |
| Aerococcus          | 2              | 57             | 0      | 0      | 0      | 0      | 0      | 0      | 0      | 0      | 0      | 0      | 0      | 0      | 0      | 0      | 0      | 0      | 0      | 0      |
| Aeromonas           | 2              | 127            | 0      | 0      | 0      | 0      | 0      | 0      | 0      | 0      | 0      | 0      | 0      | 0      | 0      | 0      | 0      | 0      | 0      | 0      |
| Aeropyrum           | 1              | 13             | 0      | 0      | 0      | 0      | 0      | 0      | 0      | 0      | 0      | 0      | 0      | 0      | 0      | 0      | 0      | 0      | 0      | 0      |
| Afipia              | 1              | 54             | 0      | 0      | 0      | 0      | 0      | 0      | 0      | 0      | 0      | 0      | 0      | 0      | 0      | 0      | 0      | 0      | 0      | 0      |
| Aggregatibacter     | 1              | 81             | 0      | 0      | 0      | 0      | 0      | 0      | 0      | 0      | 0      | 0      | 0      | 0      | 0      | 0      | 0      | 0      | 0      | 0      |
| Agrobacterium       | 2              | 242            | 0      | 0      | 0      | 0      | 0      | 1      | 0      | 0      | 0      | 0      | 0      | 0      | 0      | 0      | 0      | 0      | 0      | 0      |
| Ahrensia            | 1              | 2              | 0      | 0      | 0      | 0      | 0      | 0      | 0      | 0      | 0      | 0      | 0      | 0      | 0      | 0      | 0      | 0      | 0      | 0      |
| Akkermansia         | 2              | 47             | 0      | 0      | 0      | 0      | 0      | 0      | 0      | 0      | 0      | 0      | 0      | 0      | 0      | 0      | 0      | 0      | 0      | 0      |
| Albidiferax         | 3              | 144            | 0      | 0      | 0      | 0      | 0      | 0      | 0      | 0      | 0      | 0      | 0      | 0      | 0      | 0      | 0      | 0      | 0      | 0      |
| Alcaligenes         | 1              | 21             | 0      | 0      | 0      | 0      | 0      | 0      | 0      | 0      | 0      | 0      | 0      | 0      | 0      | 0      | 0      | 0      | 0      | 0      |
| Alcanivorax         | 2              | 146            | 0      | 0      | 0      | 0      | 0      | 0      | 0      | 0      | 0      | 0      | 0      | 1      | 0      | 0      | 0      | 0      | 0      | 0      |
| Alicyclophilus      | 3              | 152            | 0      | 0      | 0      | 0      | 0      | 0      | 0      | 0      | 0      | 0      | 0      | 0      | 0      | 0      | 0      | 0      | 0      | 0      |
| Alicyclobacillus    | 2              | 91             | 0      | 0      | 0      | 0      | 0      | 0      | 0      | 0      | 0      | 0      | 0      | 0      | 0      | 0      | 0      | 0      | 0      | 0      |
| Aliivibrio          | 2              | 118            | 0      | 0      | 0      | 0      | 0      | 0      | 0      | 0      | 0      | 0      | 0      | 0      | 0      | 0      | 0      | 0      | 0      | 0      |
| Alishewanella       | 1              | 1              | 0      | 0      | 0      | 0      | 0      | 0      | 0      | 0      | 0      | 0      | 0      | 0      | 0      | 0      | 0      | 0      | 0      | 0      |
| Alistipes           | 1              | 52             | 0      | 0      | 0      | 0      | 0      | 0      | 0      | 0      | 0      | 0      | 0      | 0      | 0      | 0      | 0      | 0      | 0      | 0      |
| Alkalilimnicola     | 2              | 97             | 0      | 0      | 0      | 0      | 0      | 0      | 0      | 0      | 0      | 0      | 0      | 0      | 0      | 0      | 0      | 0      | 0      | 0      |
| Alkaliphilus        | 2              | 62             | 0      | 0      | 0      | 0      | 0      | 0      | 0      | 0      | 0      | 0      | 0      | 0      | 0      | 0      | 0      | 0      | 0      | 0      |
| Allochromatium      | 2              | 84             | 0      | 0      | 0      | 0      | 0      | 0      | 0      | 0      | 0      | 0      | 0      | 0      | 0      | 0      | 0      | 0      | 0      | 0      |
| Alphaproteobacteria | 1              | 3              | 0      | 0      | 0      | 0      | 0      | 0      | 0      | 0      | 0      | 0      | 0      | 0      | 0      | 0      | 0      | 0      | 0      | 0      |
| Alteromonadales     | 1              | 12             | 0      | 0      | 0      | 0      | 0      | 0      | 0      | 0      | 0      | 0      | 0      | 0      | 0      | 0      | 0      | 0      | 0      | 0      |
| Alteromonas         | 1              | 37             | 0      | 0      | 0      | 0      | 0      | 0      | 0      | 0      | 0      | 0      | 0      | 0      | 0      | 0      | 0      | 0      | 0      | 0      |
| Aminobacter         | 1              | 4              | 0      | 0      | 0      | 0      | 0      | 0      | 0      | 0      | 0      | 0      | 0      | 0      | 0      | 0      | 0      | 0      | 0      | 0      |
| Aminobacterium      | 2              | 59             | 0      | 0      | 0      | 0      | 0      | 0      | 0      | 0      | 0      | 0      | 0      | 0      | 0      | 0      | 0      | 0      | 0      | 0      |

| Genus            | Cluster Number | Protein Counts | K15061 | K15062 | K15063 | K15064 | K15065 | K15066 | K15236 | K15237 | K15238 | K15242 | K15247 | K15253 | K15749 | K15751 | K15754 | K15756 | K15757 | K15981 |
|------------------|----------------|----------------|--------|--------|--------|--------|--------|--------|--------|--------|--------|--------|--------|--------|--------|--------|--------|--------|--------|--------|
| Ammonifex        | 2              | 50             | 0      | 0      | 0      | 0      | 0      | 0      | 0      | 0      | 0      | 0      | 0      | 0      | 0      | 0      | 0      | 0      | 0      | 0      |
| Amphibacillus    | 1              | 13             | 0      | 0      | 0      | 0      | 0      | 0      | 0      | 0      | 0      | 0      | 0      | 0      | 0      | 0      | 0      | 0      | 0      | 0      |
| Amphritea        | 1              | 2              | 0      | 0      | 0      | 0      | 0      | 0      | 0      | 0      | 0      | 0      | 0      | 0      | 0      | 0      | 0      | 0      | 0      | 0      |
| Amycolatopsis    | 2              | 201            | 0      | 0      | 0      | 0      | 0      | 0      | 0      | 0      | 0      | 0      | 0      | 0      | 0      | 0      | 0      | 0      | 0      | 1      |
| Amycolicoccus    | 1              | 43             | 0      | 0      | 0      | 0      | 0      | 0      | 0      | 0      | 0      | 0      | 0      | 0      | 0      | 0      | 0      | 0      | 0      | 1      |
| Anabaena         | 2              | 92             | 0      | 0      | 0      | 0      | 0      | 0      | 0      | 0      | 0      | 0      | 0      | 0      | 0      | 0      | 0      | 0      | 0      | 0      |
| Anaerobaculum    | 1              | 11             | 0      | 0      | 0      | 0      | 0      | 0      | 0      | 0      | 0      | 0      | 0      | 0      | 0      | 0      | 0      | 0      | 0      | 0      |
| Anaerococcus     | 2              | 46             | 0      | 0      | 0      | 0      | 0      | 0      | 0      | 0      | 0      | 0      | 0      | 0      | 0      | 0      | 0      | 0      | 0      | 0      |
| Anaerolinea      | 2              | 66             | 0      | 0      | 0      | 0      | 0      | 0      | 0      | 0      | 0      | 0      | 0      | 0      | 0      | 0      | 0      | 0      | 0      | 0      |
| Anaeromyxobacter | 3              | 117            | 0      | 0      | 0      | 0      | 0      | 0      | 0      | 0      | 0      | 0      | 0      | 0      | 0      | 0      | 0      | 0      | 0      | 0      |
| Anaerostipes     | 1              | 44             | 0      | 0      | 0      | 0      | 0      | 0      | 0      | 0      | 0      | 0      | 0      | 0      | 0      | 0      | 0      | 0      | 0      | 0      |
| Anaerotruncus    | 1              | 2              | 0      | 0      | 0      | 0      | 0      | 0      | 0      | 0      | 0      | 0      | 0      | 0      | 0      | 0      | 0      | 0      | 0      | 0      |
| Anaplasma        | 1              | 35             | 0      | 0      | 0      | 0      | 0      | 0      | 0      | 0      | 0      | 0      | 0      | 0      | 0      | 0      | 0      | 0      | 0      | 0      |
| Ancylobacter     | 1              | 3              | 0      | 0      | 0      | 0      | 0      | 0      | 0      | 0      | 0      | 0      | 0      | 0      | 0      | 0      | 0      | 0      | 0      | 0      |
| Aneurinibacillus | 1              | 1              | 0      | 0      | 0      | 0      | 0      | 0      | 0      | 0      | 0      | 0      | 0      | 0      | 0      | 0      | 0      | 0      | 0      | 0      |
| Angomonas        | 1              | 1              | 0      | 0      | 0      | 0      | 0      | 0      | 0      | 0      | 0      | 0      | 0      | 0      | 0      | 0      | 0      | 0      | 0      | 0      |
| Anoxybacillus    | 2              | 72             | 0      | 0      | 0      | 0      | 0      | 0      | 0      | 0      | 0      | 0      | 0      | 0      | 0      | 0      | 0      | 0      | 0      | 0      |
| Aquifex          | 2              | 45             | 0      | 0      | 0      | 0      | 0      | 0      | 0      | 0      | 0      | 0      | 0      | 0      | 0      | 0      | 0      | 0      | 0      | 0      |
| Aquimarina       | 1              | 2              | 0      | 0      | 0      | 0      | 0      | 0      | 0      | 0      | 0      | 0      | 0      | 0      | 0      | 0      | 0      | 0      | 0      | 0      |
| Arcanobacterium  | 2              | 45             | 0      | 0      | 0      | 0      | 0      | 0      | 0      | 0      | 0      | 0      | 0      | 0      | 0      | 0      | 0      | 0      | 0      | 0      |
| Archaeoglobus    | 1              | 14             | 0      | 0      | 0      | 0      | 0      | 0      | 0      | 0      | 0      | 0      | 0      | 0      | 0      | 0      | 0      | 0      | 0      | 0      |
| Arcobacter       | 2              | 101            | 0      | 0      | 0      | 0      | 0      | 0      | 0      | 0      | 0      | 0      | 0      | 0      | 0      | 0      | 0      | 0      | 0      | 0      |
| Aromatoleum      | 3              | 133            | 0      | 0      | 0      | 0      | 0      | 0      | 0      | 0      | 0      | 0      | 0      | 0      | 0      | 0      | 0      | 0      | 0      | 0      |
| Arsenophonus     | 1              | 4              | 0      | 0      | 0      | 0      | 0      | 0      | 0      | 0      | 0      | 0      | 0      | 0      | 0      | 0      | 0      | 0      | 0      | 0      |
| Arthrobacter     | 2              | 206            | 0      | 0      | 0      | 0      | 0      | 0      | 0      | 0      | 0      | 0      | 0      | 0      | 0      | 0      | 0      | 0      | 0      | 0      |
| Arthrospira      | 2              | 67             | 0      | 0      | 0      | 0      | 0      | 0      | 0      | 0      | 0      | 0      | 0      | 0      | 0      | 0      | 0      | 0      | 0      | 0      |
| Aster            | 1              | 10             | 0      | 0      | 0      | 0      | 0      | 0      | 0      | 0      | 0      | 0      | 0      | 0      | 0      | 0      | 0      | 0      | 0      | 0      |
| Asticcacaulis    | 2              | 103            | 0      | 0      | 0      | 0      | 0      | 0      | 0      | 0      | 0      | 0      | 0      | 0      | 0      | 0      | 0      | 0      | 0      | 0      |
| Atopobium        | 1              | 28             | 0      | 0      | 0      | 0      | 0      | 0      | 0      | 0      | 0      | 0      | 0      | 0      | 0      | 0      | 0      | 0      | 0      | 0      |
| Aurantimonas     | 1              | 2              | 0      | 0      | 0      | 0      | 0      | 0      | 0      | 0      | 0      | 0      | 0      | 0      | 0      | 0      | 0      | 0      | 0      | 0      |
| Avibacterium     | 1              | 17             | 0      | 0      | 0      | 0      | 0      | 0      | 0      | 0      | 0      | 0      | 0      | 0      | 0      | 0      | 0      | 0      | 0      | 0      |
| Azoarcus         | 3              | 172            | 0      | 0      | 0      | 0      | 0      | 0      | 0      | 0      | 0      | 0      | 0      | 0      | 0      | 0      | 0      | 0      | 0      | 0      |
| Azorhizobium     | 3              | 149            | 0      | 0      | 0      | 0      | 0      | 0      | 0      | 0      | 0      | 0      | 0      | 0      | 0      | 0      | 0      | 0      | 0      | 0      |
| Azorhizophilus   | 1              | 4              | 0      | 0      | 0      | 0      | 0      | 0      | 0      | 0      | 0      | 0      | 0      | 0      | 0      | 0      | 0      | 0      | 0      | 0      |
| Azospira         | 1              | 19             | 0      | 0      | 0      | 0      | 0      | 0      | 0      | 0      | 0      | 0      | 0      | 0      | 0      | 0      | 0      | 0      | 0      | 0      |
| Azospirillum     | 2              | 198            | 0      | 0      | 0      | 0      | 0      | 0      | 0      | 0      | 0      | 0      | 0      | 0      | 0      | 0      | 0      | 0      | 0      | 0      |
| Azotobacter      | 3              | 183            | 0      | 0      | 0      | 0      | 0      | 0      | 0      | 0      | 0      | 0      | 0      | 0      | 0      | 0      | 0      | 0      | 0      | 0      |
| Bacillales       | 1              | 9              | 0      | 0      | 0      | 0      | 0      | 0      | 0      | 0      | 0      | 0      | 0      | 0      | 0      | 0      | 0      | 0      | 0      | 0      |
| Bacilli          | 1              | 3              | 0      | 0      | 0      | 0      | 0      | 0      | 0      | 0      | 0      | 0      | 0      | 0      | 0      | 0      | 0      | 0      | 0      | 0      |
| Bacillus         | 2              | 237            | 0      | 0      | 0      | 0      | 0      | 0      | 0      | 0      | 0      | 0      | 0      | 0      | 0      | 0      | 0      | 0      | 0      | 0      |
| Bacteria         | 2              | 86             | 0      | 0      | 0      | 0      | 0      | 0      | 0      | 0      | 0      | 0      | 0      | 0      | 0      | 0      | 0      | 0      | 0      | 0      |
| Bacteriovorax    | 2              | 98             | 0      | 0      | 0      | 0      | 0      | 0      | 0      | 0      | 0      | 0      | 0      | 0      | 0      | 0      | 0      | 0      | 0      | 0      |
| Bacteroidales    | 2              | 59             | 0      | 0      | 0      | 0      | 0      | 0      | 0      | 0      | 0      | 0      | 0      | 0      | 0      | 0      | 0      | 0      | 0      | 0      |
| Bacteroides      | 2              | 96             | 0      | 0      | 0      | 0      | 0      | 0      | 0      | 0      | 0      | 0      | 0      | 0      | 0      | 0      | 0      | 0      | 0      | 0      |
| Bacteroidetes    | 1              | 2              | 0      | 0      | 0      | 0      | 0      | 0      | 0      | 0      | 0      | 0      | 0      | 0      | 0      | 0      | 0      | 0      | 0      | 0      |
| Bartonella       | 2              | 50             | 0      | 0      | 0      | 0      | 0      | 0      | 0      | 0      | 0      | 0      | 0      | 0      | 0      | 0      | 0      | 0      | 0      | 0      |
| Baumannia        | 2              | 24             | 0      | 0      | 0      | 0      | 0      | 0      | 0      | 0      | 0      | 0      | 0      | 0      | 0      | 0      | 0      | 0      | 0      | 0      |
| Bdellovibrio     | 2              | 87             | 0      | 0      | 0      | 0      | 0      | 0      | 0      | 0      | 0      | 0      | 0      | 0      | 0      | 0      | 0      | 0      | 0      | 0      |
| Beijerinckia     | 3              | 123            | 0      | 0      | 0      | 0      | 0      | 0      | 0      | 0      | 0      | 0      | 0      | 0      | 0      | 0      | 0      | 0      | 0      | 0      |
| Belliella        | 1              | 14             | 0      | 0      | 0      | 0      | 0      | 0      | 0      | 0      | 0      | 0      | 0      | 0      | 0      | 0      | 0      | 0      | 0      | 0      |
| Beutenbergia     | 2              | 82             | 0      | 0      | 0      | 0      | 0      | 0      | 0      | 0      | 0      | 0      | 0      | 0      | 0      | 0      | 0      | 0      | 0      | 0      |
| Bifidobacterium  | 2              | 61             | 0      | 0      | 0      | 0      | 0      | 0      | 0      | 0      | 0      | 0      | 0      | 0      | 0      | 0      | 0      | 0      | 0      | 0      |

| Genus                | Cluster Number | Protein Counts | K15061 | K15062 | K15063 | K15064 | K15065 | K15066 | K15236 | K15237 | K15238 | K15242 | K15247 | K15253 | K15749 | K15751 | K15754 | K15756 | K15757 | K15981 |
|----------------------|----------------|----------------|--------|--------|--------|--------|--------|--------|--------|--------|--------|--------|--------|--------|--------|--------|--------|--------|--------|--------|
| Bizionia             | 1              | 1              | 0      | 0      | 0      | 0      | 0      | 0      | 0      | 0      | 0      | 0      | 0      | 0      | 0      | 0      | 0      | 0      | 0      | 0      |
| Blastococcus         | 1              | 39             | 0      | 0      | 0      | 0      | 0      | 1      | 0      | 0      | 0      | 0      | 0      | 0      | 0      | 0      | 0      | 0      | 0      | 0      |
| Blattabacterium      | 1              | 23             | 0      | 0      | 0      | 0      | 0      | 0      | 0      | 0      | 0      | 0      | 0      | 0      | 0      | 0      | 0      | 0      | 0      | 0      |
| Blautia              | 1              | 22             | 0      | 0      | 0      | 0      | 0      | 0      | 0      | 0      | 0      | 0      | 0      | 0      | 0      | 0      | 0      | 0      | 0      | 0      |
| Bordetella           | 3              | 227            | 0      | 0      | 0      | 0      | 0      | 0      | 0      | 0      | 0      | 0      | 0      | 1      | 0      | 0      | 0      | 0      | 0      | 0      |
| Borrelia             | 1              | 32             | 0      | 0      | 0      | 0      | 0      | 0      | 0      | 0      | 0      | 0      | 0      | 0      | 0      | 0      | 0      | 0      | 0      | 0      |
| Brachybacterium      | 1              | 18             | 0      | 0      | 0      | 0      | 0      | 0      | 0      | 0      | 0      | 0      | 0      | 0      | 0      | 0      | 0      | 0      | 0      | 0      |
| Brachymonas          | 1              | 4              | 0      | 0      | 0      | 0      | 0      | 0      | 0      | 0      | 0      | 0      | 0      | 0      | 0      | 0      | 0      | 0      | 0      | 0      |
| Brachyspira          | 2              | 79             | 0      | 0      | 0      | 0      | 0      | 0      | 0      | 0      | 0      | 0      | 0      | 0      | 0      | 0      | 0      | 0      | 0      | 0      |
| Bradyrhizobiaceae    | 1              | 20             | 0      | 0      | 0      | 0      | 0      | 0      | 0      | 0      | 0      | 0      | 0      | 0      | 0      | 0      | 0      | 0      | 0      | 0      |
| Bradyrhizobium       | 3              | 254            | 0      | 0      | 0      | 0      | 0      | 0      | 0      | 0      | 0      | 0      | 0      | 0      | 0      | 0      | 0      | 0      | 0      | 0      |
| Brenneria            | 1              | 20             | 0      | 0      | 0      | 0      | 0      | 0      | 0      | 0      | 0      | 0      | 0      | 0      | 0      | 0      | 0      | 0      | 0      | 0      |
| Brevibacillus        | 2              | 122            | 0      | 0      | 0      | 0      | 0      | 0      | 0      | 0      | 0      | 0      | 0      | 0      | 0      | 0      | 0      | 0      | 0      | 0      |
| Brevibacterium       | 1              | 4              | 0      | 0      | 0      | 0      | 0      | 0      | 0      | 0      | 0      | 0      | 0      | 0      | 0      | 0      | 0      | 0      | 0      | 0      |
| Brevundimonas        | 2              | 105            | 0      | 0      | 0      | 1      | 0      | 0      | 0      | 0      | 0      | 0      | 0      | 0      | 0      | 0      | 0      | 0      | 0      | 0      |
| Brucella             | 3              | 138            | 0      | 0      | 0      | 0      | 0      | 0      | 0      | 0      | 0      | 0      | 0      | 0      | 0      | 0      | 0      | 0      | 0      | 0      |
| Buchnera             | 1              | 26             | 0      | 0      | 0      | 0      | 0      | 0      | 0      | 0      | 0      | 0      | 0      | 0      | 0      | 0      | 0      | 0      | 0      | 0      |
| Burkholderia         | 3              | 424            | 0      | 0      | 0      | 0      | 1      | 0      | 0      | 0      | 0      | 0      | 1      | 1      | 0      | 0      | 0      | 0      | 0      | 0      |
| Burkholderiaceae     | 3              | 143            | 0      | 0      | 0      | 0      | 0      | 0      | 0      | 0      | 0      | 0      | 0      | 0      | 0      | 0      | 0      | 0      | 0      | 0      |
| Burkholderiales      | 1              | 24             | 0      | 0      | 0      | 0      | 0      | 0      | 0      | 0      | 0      | 0      | 0      | 1      | 0      | 0      | 0      | 0      | 0      | 0      |
| Buttiauxella         | 1              | 2              | 0      | 0      | 0      | 0      | 0      | 0      | 0      | 0      | 0      | 0      | 0      | 0      | 0      | 0      | 0      | 0      | 0      | 0      |
| Butyrivibrio         | 2              | 67             | 0      | 0      | 0      | 0      | 0      | 0      | 0      | 0      | 0      | 0      | 0      | 0      | 0      | 0      | 0      | 0      | 0      | 0      |
| Caldanaerobacter     | 2              | 63             | 0      | 0      | 0      | 0      | 0      | 0      | 0      | 0      | 0      | 0      | 0      | 0      | 0      | 0      | 0      | 0      | 0      | 0      |
| Caldicellulosiruptor | 2              | 75             | 0      | 0      | 0      | 0      | 0      | 0      | 0      | 0      | 0      | 0      | 0      | 0      | 0      | 0      | 0      | 0      | 0      | 0      |
| Caldilinea           | 1              | 23             | 0      | 0      | 0      | 0      | 0      | 0      | 0      | 0      | 0      | 0      | 0      | 0      | 0      | 0      | 0      | 0      | 0      | 0      |
| Caldimonas           | 1              | 6              | 0      | 0      | 0      | 0      | 0      | 0      | 0      | 0      | 0      | 0      | 0      | 0      | 0      | 0      | 0      | 0      | 0      | 0      |
| Caldisericum         | 1              | 10             | 0      | 0      | 0      | 0      | 0      | 0      | 0      | 0      | 0      | 0      | 0      | 0      | 0      | 0      | 0      | 0      | 0      | 0      |
| Caldisphaera         | 1              | 7              | 0      | 0      | 0      | 0      | 0      | 0      | 0      | 0      | 0      | 0      | 0      | 0      | 0      | 0      | 0      | 0      | 0      | 0      |
| Calditerrivibrio     | 2              | 74             | 0      | 0      | 0      | 0      | 0      | 0      | 0      | 0      | 0      | 0      | 0      | 0      | 0      | 0      | 0      | 0      | 0      | 0      |
| Caldivirga           | 1              | 13             | 0      | 0      | 0      | 0      | 0      | 0      | 0      | 0      | 0      | 0      | 0      | 0      | 0      | 0      | 0      | 0      | 0      | 0      |
| Calothrix            | 1              | 43             | 0      | 0      | 0      | 0      | 0      | 0      | 0      | 0      | 0      | 0      | 0      | 0      | 0      | 0      | 0      | 0      | 0      | 0      |
| Calyptogena          | 2              | 34             | 0      | 0      | 0      | 0      | 0      | 0      | 0      | 0      | 0      | 0      | 0      | 0      | 0      | 0      | 0      | 0      | 0      | 0      |
| Campylobacter        | 2              | 80             | 0      | 0      | 0      | 0      | 0      | 0      | 0      | 0      | 0      | 0      | 0      | 0      | 0      | 0      | 0      | 0      | 0      | 0      |
| Candidatus           | 2              | 290            | 0      | 0      | 0      | 0      | 0      | 0      | 0      | 0      | 0      | 0      | 0      | 0      | 0      | 0      | 0      | 0      | 0      | 0      |
| Capnocytophaga       | 1              | 50             | 0      | 0      | 0      | 0      | 0      | 0      | 0      | 0      | 0      | 0      | 0      | 0      | 0      | 0      | 0      | 0      | 0      | 0      |
| Carbophilus          | 1              | 2              | 0      | 0      | 0      | 0      | 0      | 0      | 0      | 0      | 0      | 0      | 0      | 0      | 0      | 0      | 0      | 0      | 0      | 0      |
| Carboxydibrachium    | 1              | 14             | 0      | 0      | 0      | 0      | 0      | 0      | 0      | 0      | 0      | 0      | 0      | 0      | 0      | 0      | 0      | 0      | 0      | 0      |
| Carboxydotherrmus    | 2              | 68             | 0      | 0      | 0      | 0      | 0      | 0      | 0      | 0      | 0      | 0      | 0      | 0      | 0      | 0      | 0      | 0      | 0      | 0      |
| Carica               | 1              | 2              | 0      | 0      | 0      | 0      | 0      | 0      | 0      | 0      | 0      | 0      | 0      | 0      | 0      | 0      | 0      | 0      | 0      | 0      |
| Carnobacterium       | 2              | 71             | 0      | 0      | 0      | 0      | 0      | 0      | 0      | 0      | 0      | 0      | 0      | 0      | 0      | 0      | 0      | 0      | 0      | 0      |
| Catenibacterium      | 1              | 2              | 0      | 0      | 0      | 0      | 0      | 0      | 0      | 0      | 0      | 0      | 0      | 0      | 0      | 0      | 0      | 0      | 0      | 0      |
| Catenovulum          | 1              | 2              | 0      | 0      | 0      | 0      | 0      | 0      | 0      | 0      | 0      | 0      | 0      | 0      | 0      | 0      | 0      | 0      | 0      | 0      |
| Catenulispora        | 3              | 159            | 0      | 0      | 0      | 0      | 0      | 0      | 0      | 0      | 0      | 0      | 0      | 0      | 0      | 0      | 0      | 0      | 0      | 1      |
| Caulobacter          | 3              | 168            | 0      | 0      | 0      | 0      | 0      | 0      | 0      | 0      | 0      | 0      | 0      | 0      | 0      | 0      | 0      | 0      | 0      | 0      |
| Cedecea              | 1              | 45             | 0      | 0      | 0      | 0      | 0      | 0      | 0      | 0      | 0      | 0      | 0      | 0      | 0      | 0      | 0      | 0      | 0      | 0      |
| Cellulomonas         | 2              | 96             | 0      | 0      | 0      | 0      | 0      | 0      | 0      | 0      | 0      | 0      | 0      | 0      | 0      | 0      | 0      | 0      | 0      | 0      |
| Cellulophaga         | 2              | 105            | 0      | 0      | 0      | 0      | 0      | 0      | 0      | 0      | 0      | 0      | 0      | 0      | 0      | 0      | 0      | 0      | 0      | 0      |
| Cellulosilyticum     | 1              | 14             | 0      | 0      | 0      | 0      | 0      | 0      | 0      | 0      | 0      | 0      | 0      | 0      | 0      | 0      | 0      | 0      | 0      | 0      |
| Cellvibrio           | 2              | 85             | 0      | 0      | 0      | 0      | 0      | 0      | 0      | 0      | 0      | 0      | 0      | 0      | 0      | 0      | 0      | 0      | 0      | 0      |
| Cenarchaeum          | 1              | 7              | 0      | 0      | 0      | 0      | 0      | 0      | 0      | 0      | 0      | 0      | 0      | 0      | 0      | 0      | 0      | 0      | 0      | 0      |
| Chamaesiphon         | 1              | 13             | 0      | 0      | 0      | 0      | 0      | 0      | 0      | 0      | 0      | 0      | 0      | 0      | 0      | 0      | 0      | 0      | 0      | 0      |
| Chelativorans        | 3              | 136            | 0      | 0      | 0      | 0      | 0      | 0      | 0      | 0      | 0      | 0      | 0      | 0      | 0      | 0      | 0      | 0      | 0      | 0      |

| Genus                  | Cluster Number | Protein Counts | K15061 | K15062 | K15063 | K15064 | K15065 | K15066 | K15236 | K15237 | K15238 | K15242 | K15247 | K15253 | K15749 | K15751 | K15754 | K15756 | K15757 | K15981 |
|------------------------|----------------|----------------|--------|--------|--------|--------|--------|--------|--------|--------|--------|--------|--------|--------|--------|--------|--------|--------|--------|--------|
| Chelatococcus          | 1              | 2              | 0      | 0      | 0      | 0      | 0      | 0      | 0      | 0      | 0      | 0      | 0      | 0      | 0      | 0      | 0      | 0      | 0      | 0      |
| Chitinophaga           | 2              | 98             | 0      | 0      | 0      | 0      | 0      | 0      | 0      | 0      | 0      | 0      | 0      | 0      | 0      | 0      | 0      | 0      | 0      | 0      |
| Chlamydia              | 1              | 36             | 0      | 0      | 0      | 0      | 0      | 0      | 0      | 0      | 0      | 0      | 0      | 0      | 0      | 0      | 0      | 0      | 0      | 0      |
| Chlamydomonas          | 1              | 3              | 0      | 0      | 0      | 0      | 0      | 0      | 0      | 0      | 0      | 0      | 0      | 0      | 0      | 0      | 0      | 0      | 0      | 0      |
| Chlamydomphila         | 1              | 31             | 0      | 0      | 0      | 0      | 0      | 0      | 0      | 0      | 0      | 0      | 0      | 0      | 0      | 0      | 0      | 0      | 0      | 0      |
| Chlorobaculum          | 2              | 61             | 0      | 0      | 0      | 0      | 0      | 0      | 0      | 0      | 0      | 0      | 0      | 0      | 0      | 0      | 0      | 0      | 0      | 0      |
| Chlorobium             | 2              | 89             | 0      | 0      | 0      | 0      | 0      | 0      | 0      | 0      | 0      | 0      | 0      | 0      | 0      | 0      | 0      | 0      | 0      | 0      |
| Chlorobium/Pelodictyon | 1              | 2              | 0      | 0      | 0      | 0      | 0      | 0      | 0      | 0      | 0      | 0      | 0      | 0      | 0      | 0      | 0      | 0      | 0      | 0      |
| Chloroflexus           | 2              | 105            | 0      | 0      | 0      | 0      | 0      | 0      | 0      | 0      | 0      | 0      | 0      | 0      | 0      | 0      | 0      | 0      | 0      | 0      |
| Chlorogloeopsis        | 1              | 9              | 0      | 0      | 0      | 0      | 0      | 0      | 0      | 0      | 0      | 0      | 0      | 0      | 0      | 0      | 0      | 0      | 0      | 0      |
| Chloroherpeton         | 2              | 59             | 0      | 0      | 0      | 0      | 0      | 0      | 0      | 0      | 0      | 0      | 0      | 0      | 0      | 0      | 0      | 0      | 0      | 0      |
| Chromobacterium        | 2              | 117            | 0      | 0      | 0      | 0      | 0      | 0      | 0      | 0      | 0      | 0      | 0      | 0      | 0      | 0      | 0      | 0      | 0      | 0      |
| Chromohalobacter       | 2              | 145            | 0      | 0      | 0      | 0      | 0      | 0      | 0      | 0      | 0      | 0      | 0      | 0      | 0      | 0      | 0      | 0      | 0      | 0      |
| Chroococciopsis        | 1              | 24             | 0      | 0      | 0      | 0      | 0      | 0      | 0      | 0      | 0      | 0      | 0      | 0      | 0      | 0      | 0      | 0      | 0      | 0      |
| Chryseobacterium       | 2              | 104            | 0      | 0      | 0      | 0      | 0      | 0      | 0      | 0      | 0      | 0      | 0      | 0      | 0      | 0      | 0      | 0      | 0      | 0      |
| Citricella             | 1              | 13             | 0      | 0      | 0      | 0      | 0      | 0      | 0      | 0      | 0      | 0      | 0      | 0      | 0      | 0      | 0      | 0      | 0      | 0      |
| Citrobacter            | 2              | 190            | 0      | 0      | 0      | 0      | 0      | 0      | 0      | 0      | 0      | 0      | 0      | 0      | 0      | 0      | 0      | 0      | 0      | 0      |
| Clavibacter            | 2              | 83             | 0      | 0      | 0      | 0      | 0      | 0      | 0      | 0      | 0      | 0      | 0      | 0      | 0      | 0      | 0      | 0      | 0      | 0      |
| Clonorchis             | 1              | 1              | 0      | 0      | 0      | 0      | 0      | 0      | 0      | 0      | 0      | 0      | 0      | 0      | 0      | 0      | 0      | 0      | 0      | 0      |
| Clostridiales          | 2              | 77             | 0      | 0      | 0      | 0      | 0      | 0      | 0      | 0      | 0      | 0      | 0      | 0      | 0      | 0      | 0      | 0      | 0      | 0      |
| Clostridium            | 2              | 191            | 0      | 0      | 0      | 0      | 0      | 0      | 0      | 0      | 0      | 0      | 0      | 0      | 0      | 0      | 0      | 0      | 0      | 0      |
| Cohnella               | 1              | 2              | 0      | 0      | 0      | 0      | 0      | 0      | 0      | 0      | 0      | 0      | 0      | 0      | 0      | 0      | 0      | 0      | 0      | 0      |
| Coleofasciculus        | 1              | 4              | 0      | 0      | 0      | 0      | 0      | 0      | 0      | 0      | 0      | 0      | 0      | 0      | 0      | 0      | 0      | 0      | 0      | 0      |
| Collimonas             | 1              | 35             | 0      | 0      | 0      | 0      | 0      | 0      | 0      | 0      | 0      | 0      | 0      | 0      | 0      | 0      | 0      | 0      | 0      | 0      |
| Colwellia              | 2              | 130            | 0      | 0      | 0      | 0      | 0      | 0      | 0      | 0      | 0      | 0      | 0      | 0      | 0      | 0      | 0      | 0      | 0      | 0      |
| Comamonas              | 2              | 196            | 0      | 0      | 0      | 0      | 0      | 0      | 0      | 0      | 0      | 0      | 0      | 0      | 0      | 0      | 0      | 0      | 0      | 0      |
| Conexibacter           | 3              | 117            | 0      | 0      | 0      | 0      | 0      | 0      | 0      | 0      | 0      | 0      | 0      | 0      | 0      | 0      | 0      | 0      | 0      | 0      |
| Coprobacillus          | 1              | 2              | 0      | 0      | 0      | 0      | 0      | 0      | 0      | 0      | 0      | 0      | 0      | 0      | 0      | 0      | 0      | 0      | 0      | 0      |
| Coprococcus            | 2              | 76             | 0      | 0      | 0      | 0      | 0      | 0      | 0      | 0      | 0      | 0      | 0      | 0      | 0      | 0      | 0      | 0      | 0      | 0      |
| Coprothermobacter      | 2              | 45             | 0      | 0      | 0      | 0      | 0      | 0      | 0      | 0      | 0      | 0      | 0      | 0      | 0      | 0      | 0      | 0      | 0      | 0      |
| Coralimargarita        | 2              | 68             | 0      | 0      | 0      | 0      | 0      | 0      | 0      | 0      | 0      | 0      | 0      | 0      | 0      | 0      | 0      | 0      | 0      | 0      |
| Corallococcus          | 1              | 29             | 0      | 0      | 0      | 0      | 0      | 0      | 0      | 0      | 0      | 0      | 0      | 0      | 0      | 0      | 0      | 0      | 0      | 0      |
| Coriobacterium         | 2              | 36             | 0      | 0      | 0      | 0      | 0      | 0      | 0      | 0      | 0      | 0      | 0      | 0      | 0      | 0      | 0      | 0      | 0      | 0      |
| Corynebacterineae      | 1              | 5              | 0      | 0      | 0      | 0      | 0      | 0      | 0      | 0      | 0      | 0      | 0      | 0      | 0      | 0      | 0      | 0      | 0      | 0      |
| Corynebacterium        | 2              | 175            | 0      | 0      | 0      | 0      | 0      | 0      | 0      | 0      | 0      | 0      | 0      | 0      | 0      | 0      | 0      | 0      | 0      | 0      |
| Coxiella               | 2              | 54             | 0      | 0      | 0      | 0      | 0      | 0      | 0      | 0      | 0      | 0      | 0      | 0      | 0      | 0      | 0      | 0      | 0      | 0      |
| Crinalium              | 1              | 21             | 0      | 0      | 0      | 0      | 0      | 0      | 0      | 0      | 0      | 0      | 0      | 0      | 0      | 0      | 0      | 0      | 0      | 0      |
| Croceibacter           | 2              | 80             | 0      | 0      | 0      | 0      | 0      | 0      | 0      | 0      | 0      | 0      | 0      | 0      | 0      | 0      | 0      | 0      | 0      | 0      |
| Crocospaera            | 1              | 6              | 0      | 0      | 0      | 0      | 0      | 0      | 0      | 0      | 0      | 0      | 0      | 0      | 0      | 0      | 0      | 0      | 0      | 0      |
| Cronobacter            | 2              | 120            | 0      | 0      | 0      | 0      | 0      | 0      | 0      | 0      | 0      | 0      | 0      | 0      | 0      | 0      | 0      | 0      | 0      | 0      |
| Cryptobacterium        | 2              | 39             | 0      | 0      | 0      | 0      | 0      | 0      | 0      | 0      | 0      | 0      | 0      | 0      | 0      | 0      | 0      | 0      | 0      | 0      |
| Cucumis                | 1              | 9              | 0      | 0      | 0      | 0      | 0      | 0      | 0      | 0      | 0      | 0      | 0      | 0      | 0      | 0      | 0      | 0      | 0      | 0      |
| Cupriavidus            | 3              | 317            | 0      | 0      | 0      | 0      | 1      | 0      | 0      | 0      | 0      | 0      | 1      | 1      | 0      | 0      | 0      | 0      | 0      | 0      |
| Curtobacterium         | 1              | 5              | 0      | 0      | 0      | 0      | 0      | 0      | 0      | 0      | 0      | 0      | 0      | 0      | 0      | 0      | 0      | 0      | 0      | 0      |
| Curvibacter            | 1              | 27             | 0      | 0      | 0      | 0      | 0      | 0      | 0      | 0      | 0      | 0      | 0      | 0      | 0      | 0      | 0      | 0      | 0      | 0      |
| Cyanobacterium         | 1              | 9              | 0      | 0      | 0      | 0      | 0      | 0      | 0      | 0      | 0      | 0      | 0      | 0      | 0      | 0      | 0      | 0      | 0      | 0      |
| Cyanobium              | 1              | 10             | 0      | 0      | 0      | 0      | 0      | 0      | 0      | 0      | 0      | 0      | 0      | 0      | 0      | 0      | 0      | 0      | 0      | 0      |
| Cyanothece             | 1              | 34             | 0      | 0      | 0      | 0      | 0      | 0      | 0      | 0      | 0      | 0      | 0      | 0      | 0      | 0      | 0      | 0      | 0      | 0      |
| Cyclobacterium         | 1              | 19             | 0      | 0      | 0      | 0      | 0      | 0      | 0      | 0      | 0      | 0      | 0      | 0      | 0      | 0      | 0      | 0      | 0      | 0      |
| Cycloclasticus         | 1              | 21             | 0      | 0      | 0      | 0      | 0      | 0      | 0      | 0      | 0      | 0      | 0      | 0      | 0      | 0      | 0      | 0      | 0      | 0      |
| Cylindrospermopsis     | 1              | 4              | 0      | 0      | 0      | 0      | 0      | 0      | 0      | 0      | 0      | 0      | 0      | 0      | 0      | 0      | 0      | 0      | 0      | 0      |
| Cylindrospermum        | 1              | 30             | 0      | 0      | 0      | 0      | 0      | 0      | 0      | 0      | 0      | 0      | 0      | 0      | 0      | 0      | 0      | 0      | 0      | 0      |

| Genus              | Cluster Number | Protein Counts | K15061 | K15062 | K15063 | K15064 | K15065 | K15066 | K15236 | K15237 | K15238 | K15242 | K15247 | K15253 | K15749 | K15751 | K15754 | K15756 | K15757 | K15981 |
|--------------------|----------------|----------------|--------|--------|--------|--------|--------|--------|--------|--------|--------|--------|--------|--------|--------|--------|--------|--------|--------|--------|
| Cytophaga          | 2              | 69             | 0      | 0      | 0      | 0      | 0      | 0      | 0      | 0      | 0      | 0      | 0      | 0      | 0      | 0      | 0      | 0      | 0      | 0      |
| Dactylococcopsis   | 1              | 8              | 0      | 0      | 0      | 0      | 0      | 0      | 0      | 0      | 0      | 0      | 0      | 0      | 0      | 0      | 0      | 0      | 0      | 0      |
| Dechloromonas      | 1              | 40             | 0      | 0      | 0      | 0      | 0      | 0      | 0      | 0      | 0      | 0      | 0      | 0      | 0      | 0      | 0      | 0      | 0      | 0      |
| Dechlorosoma       | 1              | 19             | 0      | 0      | 0      | 0      | 0      | 0      | 0      | 0      | 0      | 0      | 0      | 0      | 0      | 0      | 0      | 0      | 0      | 0      |
| Deferribacter      | 2              | 73             | 0      | 0      | 0      | 0      | 0      | 0      | 0      | 0      | 0      | 0      | 0      | 0      | 0      | 0      | 0      | 0      | 0      | 0      |
| Dehalobacter       | 1              | 9              | 0      | 0      | 0      | 0      | 0      | 0      | 0      | 0      | 0      | 0      | 0      | 0      | 0      | 0      | 0      | 0      | 0      | 0      |
| Dehalococcoides    | 2              | 41             | 0      | 0      | 0      | 0      | 0      | 0      | 0      | 0      | 0      | 0      | 0      | 0      | 0      | 0      | 0      | 0      | 0      | 0      |
| Dehalogenimonas    | 1              | 37             | 0      | 0      | 0      | 0      | 0      | 0      | 0      | 0      | 0      | 0      | 0      | 0      | 0      | 0      | 0      | 0      | 0      | 0      |
| Deinococcus        | 2              | 140            | 0      | 0      | 0      | 0      | 0      | 0      | 0      | 0      | 0      | 0      | 0      | 0      | 0      | 0      | 0      | 0      | 0      | 0      |
| Delftia            | 3              | 177            | 0      | 0      | 0      | 0      | 0      | 0      | 0      | 0      | 0      | 0      | 0      | 1      | 0      | 0      | 0      | 0      | 0      | 0      |
| Denitrovibrio      | 2              | 67             | 0      | 0      | 0      | 0      | 0      | 0      | 0      | 0      | 0      | 0      | 0      | 0      | 0      | 0      | 0      | 0      | 0      | 0      |
| Desulfarculus      | 2              | 92             | 0      | 0      | 0      | 0      | 0      | 0      | 0      | 0      | 0      | 0      | 0      | 0      | 0      | 0      | 0      | 0      | 0      | 0      |
| Desulfatibacillum  | 3              | 84             | 0      | 0      | 0      | 0      | 0      | 0      | 0      | 0      | 0      | 0      | 0      | 0      | 0      | 0      | 0      | 0      | 0      | 0      |
| Desulfitobacterium | 2              | 102            | 0      | 0      | 0      | 0      | 0      | 0      | 0      | 0      | 0      | 0      | 0      | 0      | 0      | 0      | 0      | 0      | 0      | 0      |
| Desulfobacca       | 2              | 65             | 0      | 0      | 0      | 0      | 0      | 0      | 0      | 0      | 0      | 0      | 0      | 0      | 0      | 0      | 0      | 0      | 0      | 0      |
| Desulfobacterium   | 2              | 113            | 0      | 0      | 0      | 0      | 0      | 0      | 0      | 0      | 0      | 0      | 0      | 0      | 0      | 0      | 0      | 0      | 0      | 0      |
| Desulfobacula      | 1              | 21             | 0      | 0      | 0      | 0      | 0      | 0      | 0      | 0      | 0      | 0      | 0      | 0      | 0      | 0      | 0      | 0      | 0      | 0      |
| Desulfobulbus      | 2              | 88             | 0      | 0      | 0      | 0      | 0      | 0      | 0      | 0      | 0      | 0      | 0      | 0      | 0      | 0      | 0      | 0      | 0      | 0      |
| Desulfocapsa       | 1              | 9              | 0      | 0      | 0      | 0      | 0      | 0      | 0      | 0      | 0      | 0      | 0      | 0      | 0      | 0      | 0      | 0      | 0      | 0      |
| Desulfococcus      | 2              | 80             | 0      | 0      | 0      | 0      | 0      | 0      | 0      | 0      | 0      | 0      | 0      | 0      | 0      | 0      | 0      | 0      | 0      | 0      |
| Desulfohalobium    | 2              | 52             | 0      | 0      | 0      | 0      | 0      | 0      | 0      | 0      | 0      | 0      | 0      | 0      | 0      | 0      | 0      | 0      | 0      | 0      |
| Desulfomicrobium   | 2              | 65             | 0      | 0      | 0      | 0      | 0      | 0      | 0      | 0      | 0      | 0      | 0      | 0      | 0      | 0      | 0      | 0      | 0      | 0      |
| Desulfomonile      | 1              | 25             | 0      | 0      | 0      | 0      | 0      | 0      | 0      | 0      | 0      | 0      | 0      | 0      | 0      | 0      | 0      | 0      | 0      | 0      |
| Desulforhabdus     | 1              | 2              | 0      | 0      | 0      | 0      | 0      | 0      | 0      | 0      | 0      | 0      | 0      | 0      | 0      | 0      | 0      | 0      | 0      | 0      |
| Desulfosporosinus  | 1              | 30             | 0      | 0      | 0      | 0      | 0      | 0      | 0      | 0      | 0      | 0      | 0      | 0      | 0      | 0      | 0      | 0      | 0      | 0      |
| Desulfotalea       | 2              | 66             | 0      | 0      | 0      | 0      | 0      | 0      | 0      | 0      | 0      | 0      | 0      | 0      | 0      | 0      | 0      | 0      | 0      | 0      |
| Desulfotomaculum   | 2              | 98             | 0      | 0      | 0      | 0      | 0      | 0      | 0      | 0      | 0      | 0      | 0      | 0      | 0      | 0      | 0      | 0      | 0      | 0      |
| Desulfovibrio      | 2              | 144            | 0      | 0      | 0      | 0      | 0      | 0      | 0      | 0      | 0      | 0      | 0      | 0      | 0      | 0      | 0      | 0      | 0      | 0      |
| Desulfurispirillum | 2              | 78             | 0      | 0      | 0      | 0      | 0      | 0      | 0      | 0      | 0      | 0      | 0      | 0      | 0      | 0      | 0      | 0      | 0      | 0      |
| Desulfurivibrio    | 2              | 71             | 0      | 0      | 0      | 0      | 0      | 0      | 0      | 0      | 0      | 0      | 0      | 0      | 0      | 0      | 0      | 0      | 0      | 0      |
| Desulfurobacterium | 2              | 53             | 0      | 0      | 0      | 0      | 0      | 0      | 0      | 0      | 0      | 0      | 0      | 0      | 0      | 0      | 0      | 0      | 0      | 0      |
| Desulfurococcus    | 1              | 11             | 0      | 0      | 0      | 0      | 0      | 0      | 0      | 0      | 0      | 0      | 0      | 0      | 0      | 0      | 0      | 0      | 0      | 0      |
| Diaphorobacter     | 1              | 16             | 0      | 0      | 0      | 0      | 0      | 0      | 0      | 0      | 0      | 0      | 0      | 0      | 0      | 0      | 0      | 0      | 0      | 0      |
| Dichelobacter      | 2              | 45             | 0      | 0      | 0      | 0      | 0      | 0      | 0      | 0      | 0      | 0      | 0      | 0      | 0      | 0      | 0      | 0      | 0      | 0      |
| Dickeya            | 2              | 155            | 0      | 0      | 0      | 0      | 0      | 0      | 0      | 0      | 0      | 0      | 0      | 0      | 0      | 0      | 0      | 0      | 0      | 0      |
| Dictyoglomus       | 2              | 62             | 0      | 0      | 0      | 0      | 0      | 0      | 0      | 0      | 0      | 0      | 0      | 0      | 0      | 0      | 0      | 0      | 0      | 0      |
| Dinoroseobacter    | 3              | 148            | 0      | 0      | 0      | 0      | 0      | 0      | 0      | 0      | 0      | 0      | 0      | 0      | 0      | 0      | 0      | 0      | 0      | 0      |
| Dokdonia           | 1              | 3              | 0      | 0      | 0      | 0      | 0      | 0      | 0      | 0      | 0      | 0      | 0      | 0      | 0      | 0      | 0      | 0      | 0      | 0      |
| Dorea              | 1              | 7              | 0      | 0      | 0      | 0      | 0      | 0      | 0      | 0      | 0      | 0      | 0      | 0      | 0      | 0      | 0      | 0      | 0      | 0      |
| Dyadobacter        | 2              | 83             | 0      | 0      | 0      | 0      | 0      | 0      | 0      | 0      | 0      | 0      | 0      | 0      | 0      | 0      | 0      | 0      | 0      | 0      |
| Echinicola         | 1              | 20             | 0      | 0      | 0      | 0      | 0      | 0      | 0      | 0      | 0      | 0      | 0      | 0      | 0      | 0      | 0      | 0      | 0      | 0      |
| Edwardsiella       | 2              | 126            | 0      | 0      | 0      | 0      | 0      | 0      | 0      | 0      | 0      | 0      | 0      | 0      | 0      | 0      | 0      | 0      | 0      | 0      |
| Eggerthella        | 1              | 51             | 0      | 0      | 0      | 0      | 0      | 0      | 0      | 0      | 0      | 0      | 0      | 0      | 0      | 0      | 0      | 0      | 0      | 0      |
| Ehrlichia          | 2              | 37             | 0      | 0      | 0      | 0      | 0      | 0      | 0      | 0      | 0      | 0      | 0      | 0      | 0      | 0      | 0      | 0      | 0      | 0      |
| Eikenella          | 1              | 4              | 0      | 0      | 0      | 0      | 0      | 0      | 0      | 0      | 0      | 0      | 0      | 0      | 0      | 0      | 0      | 0      | 0      | 0      |
| Elusimicrobium     | 2              | 44             | 0      | 0      | 0      | 0      | 0      | 0      | 0      | 0      | 0      | 0      | 0      | 0      | 0      | 0      | 0      | 0      | 0      | 0      |
| Emticicia          | 1              | 21             | 0      | 0      | 0      | 0      | 0      | 0      | 0      | 0      | 0      | 0      | 0      | 0      | 0      | 0      | 0      | 0      | 0      | 0      |
| Enhydrobacter      | 1              | 1              | 0      | 0      | 0      | 0      | 0      | 0      | 0      | 0      | 0      | 0      | 0      | 0      | 0      | 0      | 0      | 0      | 0      | 0      |
| Ensifer            | 1              | 2              | 0      | 0      | 0      | 0      | 0      | 0      | 0      | 0      | 0      | 0      | 0      | 0      | 0      | 0      | 0      | 0      | 0      | 0      |
| Enterobacter       | 2              | 202            | 0      | 0      | 0      | 0      | 0      | 0      | 0      | 0      | 0      | 0      | 0      | 0      | 0      | 0      | 0      | 0      | 0      | 0      |
| Enterobacteriaceae | 2              | 211            | 0      | 0      | 0      | 0      | 0      | 0      | 0      | 0      | 0      | 0      | 0      | 0      | 0      | 0      | 0      | 0      | 0      | 0      |
| Enterococcus       | 1              | 187            | 0      | 0      | 0      | 0      | 0      | 0      | 0      | 0      | 0      | 0      | 0      | 0      | 0      | 0      | 0      | 0      | 0      | 0      |

| Genus               | Cluster Number | Protein Counts | K15061 | K15062 | K15063 | K15064 | K15065 | K15066 | K15236 | K15237 | K15238 | K15242 | K15247 | K15253 | K15749 | K15751 | K15754 | K15756 | K15757 | K15981 |
|---------------------|----------------|----------------|--------|--------|--------|--------|--------|--------|--------|--------|--------|--------|--------|--------|--------|--------|--------|--------|--------|--------|
| Enterovibrio        | 1              | 15             | 0      | 0      | 0      | 0      | 0      | 0      | 0      | 0      | 0      | 0      | 0      | 0      | 0      | 0      | 0      | 0      | 0      | 0      |
| Erwinia             | 2              | 151            | 0      | 0      | 0      | 0      | 0      | 0      | 0      | 0      | 0      | 0      | 0      | 0      | 0      | 0      | 0      | 0      | 0      | 0      |
| Erysipelothrix      | 1              | 9              | 0      | 0      | 0      | 0      | 0      | 0      | 0      | 0      | 0      | 0      | 0      | 0      | 0      | 0      | 0      | 0      | 0      | 0      |
| Erysipelotrichaceae | 1              | 4              | 0      | 0      | 0      | 0      | 0      | 0      | 0      | 0      | 0      | 0      | 0      | 0      | 0      | 0      | 0      | 0      | 0      | 0      |
| Erythrobacter       | 2              | 80             | 0      | 0      | 0      | 0      | 0      | 0      | 0      | 0      | 0      | 0      | 0      | 0      | 0      | 0      | 0      | 0      | 0      | 0      |
| Escherichia         | 2              | 242            | 0      | 0      | 0      | 0      | 0      | 0      | 0      | 0      | 0      | 0      | 0      | 0      | 0      | 0      | 0      | 0      | 0      | 0      |
| Ethanoligenens      | 2              | 69             | 0      | 0      | 0      | 0      | 0      | 0      | 0      | 0      | 0      | 0      | 0      | 0      | 0      | 0      | 0      | 0      | 0      | 0      |
| Eubacteriaceae      | 1              | 2              | 0      | 0      | 0      | 0      | 0      | 0      | 0      | 0      | 0      | 0      | 0      | 0      | 0      | 0      | 0      | 0      | 0      | 0      |
| Eubacterium         | 2              | 103            | 0      | 0      | 0      | 0      | 0      | 0      | 0      | 0      | 0      | 0      | 0      | 0      | 0      | 0      | 0      | 0      | 0      | 0      |
| Eudoraea            | 1              | 4              | 0      | 0      | 0      | 0      | 0      | 0      | 0      | 0      | 0      | 0      | 0      | 0      | 0      | 0      | 0      | 0      | 0      | 0      |
| Euryarchaeota       | 1              | 1              | 0      | 0      | 0      | 0      | 0      | 0      | 0      | 0      | 0      | 0      | 0      | 0      | 0      | 0      | 0      | 0      | 0      | 0      |
| Exiguobacterium     | 2              | 93             | 0      | 0      | 0      | 0      | 0      | 0      | 0      | 0      | 0      | 0      | 0      | 0      | 0      | 0      | 0      | 0      | 0      | 0      |
| Faecalibacterium    | 1              | 12             | 0      | 0      | 0      | 0      | 0      | 0      | 0      | 0      | 0      | 0      | 0      | 0      | 0      | 0      | 0      | 0      | 0      | 0      |
| Ferrimonas          | 2              | 115            | 0      | 0      | 0      | 0      | 0      | 0      | 0      | 0      | 0      | 0      | 0      | 0      | 0      | 0      | 0      | 0      | 0      | 0      |
| Ferroglobus         | 1              | 14             | 0      | 0      | 0      | 0      | 0      | 0      | 0      | 0      | 0      | 0      | 0      | 0      | 0      | 0      | 0      | 0      | 0      | 0      |
| Ferroplasma         | 1              | 11             | 0      | 0      | 0      | 0      | 0      | 0      | 0      | 0      | 0      | 0      | 0      | 0      | 0      | 0      | 0      | 0      | 0      | 0      |
| Fervidicoccus       | 1              | 7              | 0      | 0      | 0      | 0      | 0      | 0      | 0      | 0      | 0      | 0      | 0      | 0      | 0      | 0      | 0      | 0      | 0      | 0      |
| Fervidobacterium    | 2              | 54             | 0      | 0      | 0      | 0      | 0      | 0      | 0      | 0      | 0      | 0      | 0      | 0      | 0      | 0      | 0      | 0      | 0      | 0      |
| Fibrella            | 1              | 17             | 0      | 0      | 0      | 0      | 0      | 0      | 0      | 0      | 0      | 0      | 0      | 0      | 0      | 0      | 0      | 0      | 0      | 0      |
| Fibroacter          | 2              | 52             | 0      | 0      | 0      | 0      | 0      | 0      | 0      | 0      | 0      | 0      | 0      | 0      | 0      | 0      | 0      | 0      | 0      | 0      |
| Filifactor          | 1              | 9              | 0      | 0      | 0      | 0      | 0      | 0      | 0      | 0      | 0      | 0      | 0      | 0      | 0      | 0      | 0      | 0      | 0      | 0      |
| Finegoldia          | 2              | 55             | 0      | 0      | 0      | 0      | 0      | 0      | 0      | 0      | 0      | 0      | 0      | 0      | 0      | 0      | 0      | 0      | 0      | 0      |
| Firmicutes          | 1              | 15             | 0      | 0      | 0      | 0      | 0      | 0      | 0      | 0      | 0      | 0      | 0      | 0      | 0      | 0      | 0      | 0      | 0      | 0      |
| Fischerella         | 1              | 15             | 0      | 0      | 0      | 0      | 0      | 0      | 0      | 0      | 0      | 0      | 0      | 0      | 0      | 0      | 0      | 0      | 0      | 0      |
| Flavobacteria       | 1              | 7              | 0      | 0      | 0      | 0      | 0      | 0      | 0      | 0      | 0      | 0      | 0      | 0      | 0      | 0      | 0      | 0      | 0      | 0      |
| Flavobacteriaceae   | 2              | 69             | 0      | 0      | 0      | 0      | 0      | 0      | 0      | 0      | 0      | 0      | 0      | 0      | 0      | 0      | 0      | 0      | 0      | 0      |
| Flavobacteriales    | 1              | 3              | 0      | 0      | 0      | 0      | 0      | 0      | 0      | 0      | 0      | 0      | 0      | 0      | 0      | 0      | 0      | 0      | 0      | 0      |
| Flavobacterium      | 2              | 103            | 0      | 0      | 0      | 0      | 0      | 0      | 0      | 0      | 0      | 0      | 0      | 0      | 0      | 0      | 0      | 0      | 0      | 0      |
| Flexibacter         | 1              | 17             | 0      | 0      | 0      | 0      | 0      | 0      | 0      | 0      | 0      | 0      | 0      | 0      | 0      | 0      | 0      | 0      | 0      | 0      |
| Flexistipes         | 1              | 11             | 0      | 0      | 0      | 0      | 0      | 0      | 0      | 0      | 0      | 0      | 0      | 0      | 0      | 0      | 0      | 0      | 0      | 0      |
| Fluoribacter        | 1              | 6              | 0      | 0      | 0      | 0      | 0      | 0      | 0      | 0      | 0      | 0      | 0      | 0      | 0      | 0      | 0      | 0      | 0      | 0      |
| Fluviicola          | 2              | 69             | 0      | 0      | 0      | 0      | 0      | 0      | 0      | 0      | 0      | 0      | 0      | 0      | 0      | 0      | 0      | 0      | 0      | 0      |
| Formosa             | 1              | 2              | 0      | 0      | 0      | 0      | 0      | 0      | 0      | 0      | 0      | 0      | 0      | 0      | 0      | 0      | 0      | 0      | 0      | 0      |
| Francisella         | 2              | 88             | 0      | 0      | 0      | 0      | 0      | 0      | 0      | 0      | 0      | 0      | 0      | 0      | 0      | 0      | 0      | 0      | 0      | 0      |
| Frankia             | 3              | 202            | 0      | 0      | 0      | 0      | 0      | 0      | 0      | 0      | 0      | 0      | 0      | 0      | 0      | 0      | 0      | 0      | 0      | 1      |
| Frateuria           | 1              | 25             | 0      | 0      | 0      | 0      | 0      | 0      | 0      | 0      | 0      | 0      | 0      | 0      | 0      | 0      | 0      | 0      | 0      | 0      |
| Fructobacillus      | 1              | 2              | 0      | 0      | 0      | 0      | 0      | 0      | 0      | 0      | 0      | 0      | 0      | 0      | 0      | 0      | 0      | 0      | 0      | 0      |
| Fulvimarina         | 1              | 2              | 0      | 0      | 0      | 0      | 0      | 0      | 0      | 0      | 0      | 0      | 0      | 0      | 0      | 0      | 0      | 0      | 0      | 0      |
| Fusobacterium       | 1              | 48             | 0      | 0      | 0      | 0      | 0      | 0      | 0      | 0      | 0      | 0      | 0      | 0      | 0      | 0      | 0      | 0      | 0      | 0      |
| Gallibacterium      | 2              | 87             | 0      | 0      | 0      | 0      | 0      | 0      | 0      | 0      | 0      | 0      | 0      | 0      | 0      | 0      | 0      | 0      | 0      | 0      |
| Gallionella         | 2              | 67             | 0      | 0      | 0      | 0      | 0      | 0      | 0      | 0      | 0      | 0      | 0      | 0      | 0      | 0      | 0      | 0      | 0      | 0      |
| Gammaproteobacteria | 1              | 9              | 0      | 0      | 0      | 0      | 0      | 0      | 0      | 0      | 0      | 0      | 0      | 0      | 0      | 0      | 0      | 0      | 0      | 0      |
| Gardnerella         | 1              | 31             | 0      | 0      | 0      | 0      | 0      | 0      | 0      | 0      | 0      | 0      | 0      | 0      | 0      | 0      | 0      | 0      | 0      | 0      |
| Geitlerinema        | 1              | 9              | 0      | 0      | 0      | 0      | 0      | 0      | 0      | 0      | 0      | 0      | 0      | 0      | 0      | 0      | 0      | 0      | 0      | 0      |
| Gemmatimonas        | 2              | 93             | 0      | 0      | 0      | 0      | 0      | 0      | 0      | 0      | 0      | 0      | 0      | 0      | 0      | 0      | 0      | 0      | 0      | 0      |
| Geobacillus         | 2              | 168            | 0      | 0      | 0      | 0      | 0      | 0      | 0      | 0      | 0      | 0      | 0      | 0      | 0      | 0      | 0      | 0      | 0      | 0      |
| Geobacter           | 2              | 150            | 0      | 0      | 0      | 0      | 0      | 0      | 0      | 0      | 0      | 0      | 0      | 0      | 0      | 0      | 0      | 0      | 0      | 0      |
| Geodermatophilus    | 2              | 136            | 0      | 0      | 0      | 0      | 0      | 0      | 0      | 0      | 0      | 0      | 0      | 0      | 0      | 0      | 0      | 0      | 0      | 0      |
| Geopsychrobacter    | 1              | 2              | 0      | 0      | 0      | 0      | 0      | 0      | 0      | 0      | 0      | 0      | 0      | 0      | 0      | 0      | 0      | 0      | 0      | 0      |
| Gillisia            | 1              | 11             | 0      | 0      | 0      | 0      | 0      | 0      | 0      | 0      | 0      | 0      | 0      | 0      | 0      | 0      | 0      | 0      | 0      | 0      |
| Gilvimarinus        | 1              | 4              | 0      | 0      | 0      | 0      | 0      | 0      | 0      | 0      | 0      | 0      | 0      | 0      | 0      | 0      | 0      | 0      | 0      | 0      |
| Glaciecola          | 2              | 117            | 0      | 0      | 0      | 0      | 0      | 0      | 0      | 0      | 0      | 0      | 0      | 0      | 0      | 0      | 0      | 0      | 0      | 0      |



| Genus             | Cluster Number | Protein Counts | K15061 | K15062 | K15063 | K15064 | K15065 | K15066 | K15236 | K15237 | K15238 | K15242 | K15247 | K15253 | K15749 | K15751 | K15754 | K15756 | K15757 | K15981 |
|-------------------|----------------|----------------|--------|--------|--------|--------|--------|--------|--------|--------|--------|--------|--------|--------|--------|--------|--------|--------|--------|--------|
| Gloeobacter       | 2              | 67             | 0      | 0      | 0      | 0      | 0      | 0      | 0      | 0      | 0      | 0      | 0      | 0      | 0      | 0      | 0      | 0      | 0      | 0      |
| Gloeocapsa        | 1              | 20             | 0      | 0      | 0      | 0      | 0      | 0      | 0      | 0      | 0      | 0      | 0      | 0      | 0      | 0      | 0      | 0      | 0      | 0      |
| Gloeotheca        | 1              | 1              | 0      | 0      | 0      | 0      | 0      | 0      | 0      | 0      | 0      | 0      | 0      | 0      | 0      | 0      | 0      | 0      | 0      | 0      |
| Gluconacetobacter | 2              | 96             | 0      | 0      | 0      | 0      | 0      | 0      | 0      | 0      | 0      | 0      | 0      | 0      | 0      | 0      | 0      | 0      | 0      | 0      |
| Gluconobacter     | 2              | 76             | 0      | 0      | 0      | 0      | 0      | 0      | 0      | 0      | 0      | 0      | 0      | 0      | 0      | 0      | 0      | 0      | 0      | 0      |
| Gordonia          | 1              | 158            | 0      | 0      | 0      | 0      | 0      | 0      | 0      | 0      | 0      | 0      | 0      | 0      | 0      | 0      | 0      | 0      | 0      | 1      |
| Gordonibacter     | 1              | 32             | 0      | 0      | 0      | 0      | 0      | 0      | 0      | 0      | 0      | 0      | 0      | 0      | 0      | 0      | 0      | 0      | 0      | 0      |
| Gramella          | 2              | 104            | 0      | 0      | 0      | 0      | 0      | 0      | 0      | 0      | 0      | 0      | 0      | 0      | 0      | 0      | 0      | 0      | 0      | 0      |
| Granulibacter     | 2              | 90             | 0      | 0      | 0      | 0      | 0      | 0      | 0      | 0      | 0      | 0      | 0      | 0      | 0      | 0      | 0      | 0      | 0      | 0      |
| Granulicella      | 2              | 98             | 0      | 0      | 0      | 0      | 0      | 0      | 0      | 0      | 0      | 0      | 0      | 0      | 0      | 0      | 0      | 0      | 0      | 0      |
| Grimontia         | 1              | 9              | 0      | 0      | 0      | 0      | 0      | 0      | 0      | 0      | 0      | 0      | 0      | 0      | 0      | 0      | 0      | 0      | 0      | 0      |
| Haemophilus       | 2              | 117            | 0      | 0      | 0      | 0      | 0      | 0      | 0      | 0      | 0      | 0      | 0      | 0      | 0      | 0      | 0      | 0      | 0      | 0      |
| Hafnia            | 1              | 29             | 0      | 0      | 0      | 0      | 0      | 0      | 0      | 0      | 0      | 0      | 0      | 0      | 0      | 0      | 0      | 0      | 0      | 0      |
| Hahella           | 3              | 130            | 0      | 0      | 0      | 0      | 0      | 0      | 0      | 0      | 0      | 0      | 0      | 0      | 0      | 0      | 0      | 0      | 0      | 0      |
| Halalkalicoccus   | 1              | 18             | 0      | 0      | 0      | 0      | 0      | 0      | 0      | 0      | 0      | 0      | 0      | 0      | 0      | 0      | 0      | 0      | 0      | 0      |
| Halanaerobium     | 2              | 89             | 0      | 0      | 0      | 0      | 0      | 0      | 0      | 0      | 0      | 0      | 0      | 0      | 0      | 0      | 0      | 0      | 0      | 0      |
| Haliangium        | 2              | 108            | 0      | 0      | 0      | 0      | 0      | 0      | 0      | 0      | 0      | 0      | 0      | 0      | 0      | 0      | 0      | 0      | 0      | 0      |
| Haliscomenobacter | 2              | 107            | 0      | 0      | 0      | 0      | 0      | 0      | 0      | 0      | 0      | 0      | 0      | 0      | 0      | 0      | 0      | 0      | 0      | 0      |
| Haloarcula        | 1              | 22             | 0      | 0      | 0      | 0      | 0      | 0      | 0      | 0      | 0      | 0      | 0      | 0      | 0      | 0      | 0      | 0      | 0      | 0      |
| Halobacillus      | 1              | 19             | 0      | 0      | 0      | 0      | 0      | 0      | 0      | 0      | 0      | 0      | 0      | 0      | 0      | 0      | 0      | 0      | 0      | 0      |
| Halobacteriaceae  | 1              | 1              | 0      | 0      | 0      | 0      | 0      | 0      | 0      | 0      | 0      | 0      | 0      | 0      | 0      | 0      | 0      | 0      | 0      | 0      |
| Halobacterium     | 1              | 10             | 0      | 0      | 0      | 0      | 0      | 0      | 0      | 0      | 0      | 0      | 0      | 0      | 0      | 0      | 0      | 0      | 0      | 0      |
| Halobacteroides   | 1              | 14             | 0      | 0      | 0      | 0      | 0      | 0      | 0      | 0      | 0      | 0      | 0      | 0      | 0      | 0      | 0      | 0      | 0      | 0      |
| Haloferax         | 1              | 20             | 0      | 0      | 0      | 0      | 0      | 0      | 0      | 0      | 0      | 0      | 0      | 0      | 0      | 0      | 0      | 0      | 0      | 0      |
| Halogeometricum   | 1              | 12             | 0      | 0      | 0      | 0      | 0      | 0      | 0      | 0      | 0      | 0      | 0      | 0      | 0      | 0      | 0      | 0      | 0      | 0      |
| Halomicrobium     | 1              | 10             | 0      | 0      | 0      | 0      | 0      | 0      | 0      | 0      | 0      | 0      | 0      | 0      | 0      | 0      | 0      | 0      | 0      | 0      |
| Halomonas         | 1              | 149            | 0      | 0      | 0      | 0      | 0      | 0      | 0      | 0      | 0      | 0      | 0      | 0      | 0      | 0      | 0      | 0      | 0      | 0      |
| Halopiger         | 1              | 16             | 0      | 0      | 0      | 0      | 0      | 0      | 0      | 0      | 0      | 0      | 0      | 0      | 0      | 0      | 0      | 0      | 0      | 0      |
| Haloquadratum     | 1              | 19             | 0      | 0      | 0      | 0      | 0      | 0      | 0      | 0      | 0      | 0      | 0      | 0      | 0      | 0      | 0      | 0      | 0      | 0      |
| Halorhabdus       | 1              | 10             | 0      | 0      | 0      | 0      | 0      | 0      | 0      | 0      | 0      | 0      | 0      | 0      | 0      | 0      | 0      | 0      | 0      | 0      |
| Halorhodospira    | 2              | 71             | 0      | 0      | 0      | 0      | 0      | 0      | 0      | 0      | 0      | 0      | 0      | 0      | 0      | 0      | 0      | 0      | 0      | 0      |
| Halorubrum        | 1              | 16             | 0      | 0      | 0      | 0      | 0      | 0      | 0      | 0      | 0      | 0      | 0      | 0      | 0      | 0      | 0      | 0      | 0      | 0      |
| Haloterrigena     | 1              | 19             | 0      | 0      | 0      | 0      | 0      | 0      | 0      | 0      | 0      | 0      | 0      | 0      | 0      | 0      | 0      | 0      | 0      | 0      |
| Halothece         | 1              | 9              | 0      | 0      | 0      | 0      | 0      | 0      | 0      | 0      | 0      | 0      | 0      | 0      | 0      | 0      | 0      | 0      | 0      | 0      |
| Halothermothrix   | 2              | 50             | 0      | 0      | 0      | 0      | 0      | 0      | 0      | 0      | 0      | 0      | 0      | 0      | 0      | 0      | 0      | 0      | 0      | 0      |
| Halothiobacillus  | 2              | 65             | 0      | 0      | 0      | 0      | 0      | 0      | 0      | 0      | 0      | 0      | 0      | 0      | 0      | 0      | 0      | 0      | 0      | 0      |
| Halovivax         | 1              | 12             | 0      | 0      | 0      | 0      | 0      | 0      | 0      | 0      | 0      | 0      | 0      | 0      | 0      | 0      | 0      | 0      | 0      | 0      |
| Helicobacter      | 2              | 79             | 0      | 0      | 0      | 0      | 0      | 0      | 0      | 0      | 0      | 0      | 0      | 0      | 0      | 0      | 0      | 0      | 0      | 0      |
| Heliobacillus     | 1              | 4              | 0      | 0      | 0      | 0      | 0      | 0      | 0      | 0      | 0      | 0      | 0      | 0      | 0      | 0      | 0      | 0      | 0      | 0      |
| Heliobacterium    | 2              | 51             | 0      | 0      | 0      | 0      | 0      | 0      | 0      | 0      | 0      | 0      | 0      | 0      | 0      | 0      | 0      | 0      | 0      | 0      |
| Herbaspirillum    | 2              | 172            | 0      | 0      | 0      | 0      | 0      | 0      | 0      | 0      | 0      | 0      | 0      | 0      | 0      | 0      | 0      | 0      | 0      | 0      |
| Herminiimonas     | 3              | 89             | 0      | 0      | 0      | 0      | 0      | 0      | 0      | 0      | 0      | 0      | 0      | 0      | 0      | 0      | 0      | 0      | 0      | 0      |
| Herpetosiphon     | 3              | 90             | 0      | 0      | 0      | 0      | 0      | 0      | 0      | 0      | 0      | 0      | 0      | 0      | 0      | 0      | 0      | 0      | 0      | 0      |
| Hippea            | 2              | 44             | 0      | 0      | 0      | 0      | 0      | 0      | 0      | 0      | 0      | 0      | 0      | 0      | 0      | 0      | 0      | 0      | 0      | 0      |
| Hirschia          | 2              | 102            | 0      | 0      | 0      | 0      | 0      | 0      | 0      | 0      | 0      | 0      | 0      | 0      | 0      | 0      | 0      | 0      | 0      | 0      |
| Histophilus       | 2              | 72             | 0      | 0      | 0      | 0      | 0      | 0      | 0      | 0      | 0      | 0      | 0      | 0      | 0      | 0      | 0      | 0      | 0      | 0      |
| Hoeflea           | 1              | 16             | 0      | 0      | 0      | 0      | 0      | 0      | 0      | 0      | 0      | 0      | 0      | 0      | 0      | 0      | 0      | 0      | 0      | 0      |
| Hydrogenivirga    | 1              | 2              | 0      | 0      | 0      | 0      | 0      | 0      | 0      | 0      | 0      | 0      | 0      | 0      | 0      | 0      | 0      | 0      | 0      | 0      |
| Hydrogenobacter   | 2              | 55             | 0      | 0      | 0      | 0      | 0      | 0      | 0      | 0      | 0      | 0      | 0      | 0      | 0      | 0      | 0      | 0      | 0      | 0      |
| Hydrogenobaculum  | 2              | 44             | 0      | 0      | 0      | 0      | 0      | 0      | 0      | 0      | 0      | 0      | 0      | 0      | 0      | 0      | 0      | 0      | 0      | 0      |
| Hydrogenophaga    | 1              | 9              | 0      | 0      | 0      | 0      | 0      | 0      | 0      | 0      | 0      | 0      | 0      | 0      | 0      | 0      | 0      | 0      | 0      | 0      |
| Hylemonella       | 1              | 4              | 0      | 0      | 0      | 0      | 0      | 0      | 0      | 0      | 0      | 0      | 0      | 0      | 0      | 0      | 0      | 0      | 0      | 0      |

| Genus                 | Cluster Number | Protein Counts | K15061 | K15062 | K15063 | K15064 | K15065 | K15066 | K15236 | K15237 | K15238 | K15242 | K15247 | K15253 | K15749 | K15751 | K15754 | K15756 | K15757 | K15981 |
|-----------------------|----------------|----------------|--------|--------|--------|--------|--------|--------|--------|--------|--------|--------|--------|--------|--------|--------|--------|--------|--------|--------|
| Hyperthermus          | 1              | 6              | 0      | 0      | 0      | 0      | 0      | 0      | 0      | 0      | 0      | 0      | 0      | 0      | 0      | 0      | 0      | 0      | 0      | 0      |
| Hyphomicrobium        | 2              | 93             | 0      | 0      | 0      | 0      | 0      | 0      | 0      | 0      | 0      | 0      | 0      | 0      | 0      | 0      | 0      | 0      | 0      | 0      |
| Hyphomonas            | 3              | 105            | 0      | 0      | 0      | 0      | 0      | 0      | 0      | 0      | 0      | 0      | 0      | 0      | 0      | 0      | 0      | 0      | 0      | 0      |
| Ideonella             | 1              | 18             | 0      | 0      | 0      | 0      | 0      | 0      | 0      | 0      | 0      | 0      | 0      | 0      | 0      | 0      | 0      | 0      | 0      | 0      |
| Idiomarina            | 2              | 86             | 0      | 0      | 0      | 0      | 0      | 0      | 0      | 0      | 0      | 0      | 0      | 0      | 0      | 0      | 0      | 0      | 0      | 0      |
| Ignavibacterium       | 1              | 14             | 0      | 0      | 0      | 0      | 0      | 0      | 0      | 0      | 0      | 0      | 0      | 0      | 0      | 0      | 0      | 0      | 0      | 0      |
| Ignicoccus            | 1              | 5              | 0      | 0      | 0      | 0      | 0      | 0      | 0      | 0      | 0      | 0      | 0      | 0      | 0      | 0      | 0      | 0      | 0      | 0      |
| Ignisphaera           | 1              | 8              | 0      | 0      | 0      | 0      | 0      | 0      | 0      | 0      | 0      | 0      | 0      | 0      | 0      | 0      | 0      | 0      | 0      | 0      |
| Ilyobacter            | 2              | 85             | 0      | 0      | 0      | 0      | 0      | 0      | 0      | 0      | 0      | 0      | 0      | 0      | 0      | 0      | 0      | 0      | 0      | 0      |
| Intrasporangium       | 2              | 114            | 0      | 0      | 0      | 0      | 0      | 0      | 0      | 0      | 0      | 0      | 0      | 0      | 0      | 0      | 0      | 0      | 0      | 0      |
| Isoptericola          | 1              | 18             | 0      | 0      | 0      | 0      | 0      | 0      | 0      | 0      | 0      | 0      | 0      | 0      | 0      | 0      | 0      | 0      | 0      | 0      |
| Isosphaera            | 2              | 75             | 0      | 0      | 0      | 0      | 0      | 0      | 0      | 0      | 0      | 0      | 0      | 0      | 0      | 0      | 0      | 0      | 0      | 0      |
| Jannaschia            | 3              | 151            | 0      | 0      | 0      | 0      | 0      | 0      | 0      | 0      | 0      | 0      | 0      | 0      | 0      | 0      | 0      | 0      | 0      | 0      |
| Janthinobacterium     | 2              | 99             | 0      | 0      | 0      | 0      | 0      | 0      | 0      | 0      | 0      | 0      | 0      | 0      | 0      | 0      | 0      | 0      | 0      | 0      |
| Jonesia               | 2              | 56             | 0      | 0      | 0      | 0      | 0      | 0      | 0      | 0      | 0      | 0      | 0      | 0      | 0      | 0      | 0      | 0      | 0      | 0      |
| Joostella             | 1              | 3              | 0      | 0      | 0      | 0      | 0      | 0      | 0      | 0      | 0      | 0      | 0      | 0      | 0      | 0      | 0      | 0      | 0      | 0      |
| Kaistia               | 1              | 2              | 0      | 0      | 0      | 0      | 0      | 0      | 0      | 0      | 0      | 0      | 0      | 0      | 0      | 0      | 0      | 0      | 0      | 0      |
| Kangiella             | 2              | 84             | 0      | 0      | 0      | 0      | 0      | 0      | 0      | 0      | 0      | 0      | 0      | 0      | 0      | 0      | 0      | 0      | 0      | 0      |
| Ketogulonicigenium    | 2              | 102            | 0      | 0      | 0      | 0      | 0      | 0      | 0      | 0      | 0      | 0      | 0      | 0      | 0      | 0      | 0      | 0      | 0      | 0      |
| Kineococcus           | 1              | 24             | 0      | 0      | 0      | 0      | 0      | 0      | 0      | 0      | 0      | 0      | 0      | 0      | 0      | 0      | 0      | 0      | 0      | 0      |
| Kinetoplastibacterium | 1              | 2              | 0      | 0      | 0      | 0      | 0      | 0      | 0      | 0      | 0      | 0      | 0      | 0      | 0      | 0      | 0      | 0      | 0      | 0      |
| Kingella              | 1              | 4              | 0      | 0      | 0      | 0      | 0      | 0      | 0      | 0      | 0      | 0      | 0      | 0      | 0      | 0      | 0      | 0      | 0      | 0      |
| Kitasatospora         | 1              | 36             | 0      | 0      | 0      | 0      | 0      | 0      | 0      | 0      | 0      | 0      | 0      | 0      | 0      | 0      | 0      | 0      | 0      | 0      |
| Klebsiella            | 3              | 222            | 0      | 0      | 0      | 0      | 0      | 0      | 0      | 0      | 0      | 0      | 0      | 0      | 0      | 0      | 0      | 0      | 0      | 0      |
| Kluyvera              | 1              | 1              | 0      | 0      | 0      | 0      | 0      | 0      | 0      | 0      | 0      | 0      | 0      | 0      | 0      | 0      | 0      | 0      | 0      | 0      |
| Kocuria               | 2              | 87             | 0      | 0      | 0      | 0      | 0      | 0      | 0      | 0      | 0      | 0      | 0      | 0      | 0      | 0      | 0      | 0      | 0      | 0      |
| Kordia                | 1              | 5              | 0      | 0      | 0      | 0      | 0      | 0      | 0      | 0      | 0      | 0      | 0      | 0      | 0      | 0      | 0      | 0      | 0      | 0      |
| Kosmotoga             | 2              | 61             | 0      | 0      | 0      | 0      | 0      | 0      | 0      | 0      | 0      | 0      | 0      | 0      | 0      | 0      | 0      | 0      | 0      | 0      |
| Kribbella             | 2              | 99             | 0      | 0      | 0      | 0      | 0      | 0      | 0      | 0      | 0      | 0      | 0      | 0      | 0      | 0      | 0      | 0      | 0      | 0      |
| Krokinobacter         | 2              | 90             | 0      | 0      | 0      | 0      | 0      | 0      | 0      | 0      | 0      | 0      | 0      | 0      | 0      | 0      | 0      | 0      | 0      | 0      |
| Kyrpidia              | 2              | 113            | 0      | 0      | 0      | 0      | 0      | 0      | 0      | 0      | 0      | 0      | 0      | 0      | 0      | 0      | 0      | 0      | 0      | 0      |
| Kytococcus            | 2              | 70             | 0      | 0      | 0      | 0      | 0      | 0      | 0      | 0      | 0      | 0      | 0      | 0      | 0      | 0      | 0      | 0      | 0      | 0      |
| Labrenzia             | 1              | 4              | 0      | 0      | 0      | 0      | 0      | 0      | 0      | 0      | 0      | 0      | 0      | 0      | 0      | 0      | 0      | 0      | 0      | 0      |
| Lachnoanaerobaculum   | 1              | 1              | 0      | 0      | 0      | 0      | 0      | 0      | 0      | 0      | 0      | 0      | 0      | 0      | 0      | 0      | 0      | 0      | 0      | 0      |
| Lachnospiraceae       | 1              | 51             | 0      | 0      | 0      | 0      | 0      | 0      | 0      | 0      | 0      | 0      | 0      | 0      | 0      | 0      | 0      | 0      | 0      | 0      |
| Lacinutrix            | 1              | 20             | 0      | 0      | 0      | 0      | 0      | 0      | 0      | 0      | 0      | 0      | 0      | 0      | 0      | 0      | 0      | 0      | 0      | 0      |
| Lactobacillus         | 2              | 119            | 0      | 0      | 0      | 0      | 0      | 0      | 0      | 0      | 0      | 0      | 0      | 0      | 0      | 0      | 0      | 0      | 0      | 0      |
| Lactococcus           | 2              | 82             | 0      | 0      | 0      | 0      | 0      | 0      | 0      | 0      | 0      | 0      | 0      | 0      | 0      | 0      | 0      | 0      | 0      | 0      |
| Lamprocystis          | 1              | 2              | 0      | 0      | 0      | 0      | 0      | 0      | 0      | 0      | 0      | 0      | 0      | 0      | 0      | 0      | 0      | 0      | 0      | 0      |
| Laribacter            | 2              | 80             | 0      | 0      | 0      | 0      | 0      | 0      | 0      | 0      | 0      | 0      | 0      | 0      | 0      | 0      | 0      | 0      | 0      | 0      |
| Lawsonia              | 2              | 33             | 0      | 0      | 0      | 0      | 0      | 0      | 0      | 0      | 0      | 0      | 0      | 0      | 0      | 0      | 0      | 0      | 0      | 0      |
| Leadbetterella        | 2              | 79             | 0      | 0      | 0      | 0      | 0      | 0      | 0      | 0      | 0      | 0      | 0      | 0      | 0      | 0      | 0      | 0      | 0      | 0      |
| Leeuwenhoekiiella     | 1              | 2              | 0      | 0      | 0      | 0      | 0      | 0      | 0      | 0      | 0      | 0      | 0      | 0      | 0      | 0      | 0      | 0      | 0      | 0      |
| Legionella            | 2              | 117            | 0      | 0      | 0      | 0      | 0      | 0      | 0      | 0      | 0      | 0      | 0      | 0      | 0      | 0      | 0      | 0      | 0      | 0      |
| Leifsonia             | 2              | 48             | 0      | 0      | 0      | 0      | 0      | 0      | 0      | 0      | 0      | 0      | 0      | 0      | 0      | 0      | 0      | 0      | 0      | 0      |
| Leptolyngbya          | 1              | 10             | 0      | 0      | 0      | 0      | 0      | 0      | 0      | 0      | 0      | 0      | 0      | 0      | 0      | 0      | 0      | 0      | 0      | 0      |
| Leptospira            | 2              | 76             | 0      | 0      | 0      | 0      | 0      | 0      | 0      | 0      | 0      | 0      | 0      | 0      | 0      | 0      | 0      | 0      | 0      | 0      |
| Leptospirillum        | 1              | 10             | 0      | 0      | 0      | 0      | 0      | 0      | 0      | 0      | 0      | 0      | 0      | 0      | 0      | 0      | 0      | 0      | 0      | 0      |
| Leptothrix            | 3              | 186            | 0      | 0      | 0      | 0      | 0      | 0      | 0      | 0      | 0      | 0      | 0      | 0      | 0      | 0      | 0      | 0      | 0      | 0      |
| Leptotrichia          | 2              | 43             | 0      | 0      | 0      | 0      | 0      | 0      | 0      | 0      | 0      | 0      | 0      | 0      | 0      | 0      | 0      | 0      | 0      | 0      |
| Leucobacter           | 1              | 2              | 0      | 0      | 0      | 0      | 0      | 0      | 0      | 0      | 0      | 0      | 0      | 0      | 0      | 0      | 0      | 0      | 0      | 0      |
| Leuconostoc           | 2              | 64             | 0      | 0      | 0      | 0      | 0      | 0      | 0      | 0      | 0      | 0      | 0      | 0      | 0      | 0      | 0      | 0      | 0      | 0      |

| Genus                | Cluster Number | Protein Counts | K15061 | K15062 | K15063 | K15064 | K15065 | K15066 | K15236 | K15237 | K15238 | K15242 | K15247 | K15253 | K15749 | K15751 | K15754 | K15756 | K15757 | K15981 |
|----------------------|----------------|----------------|--------|--------|--------|--------|--------|--------|--------|--------|--------|--------|--------|--------|--------|--------|--------|--------|--------|--------|
| Liberibacter         | 1              | 4              | 0      | 0      | 0      | 0      | 0      | 0      | 0      | 0      | 0      | 0      | 0      | 0      | 0      | 0      | 0      | 0      | 0      | 0      |
| Limnohabitans        | 1              | 11             | 0      | 0      | 0      | 0      | 0      | 0      | 0      | 0      | 0      | 0      | 0      | 0      | 0      | 0      | 0      | 0      | 0      | 0      |
| Listeria             | 2              | 77             | 0      | 0      | 0      | 0      | 0      | 0      | 0      | 0      | 0      | 0      | 0      | 0      | 0      | 0      | 0      | 0      | 0      | 0      |
| Listeriaceae         | 1              | 6              | 0      | 0      | 0      | 0      | 0      | 0      | 0      | 0      | 0      | 0      | 0      | 0      | 0      | 0      | 0      | 0      | 0      | 0      |
| Listonella           | 1              | 38             | 0      | 0      | 0      | 0      | 0      | 0      | 0      | 0      | 0      | 0      | 0      | 0      | 0      | 0      | 0      | 0      | 0      | 0      |
| Loktanella           | 1              | 3              | 0      | 0      | 0      | 0      | 0      | 0      | 0      | 0      | 0      | 0      | 0      | 0      | 0      | 0      | 0      | 0      | 0      | 0      |
| Lysinibacillus       | 2              | 97             | 0      | 0      | 0      | 0      | 0      | 0      | 0      | 0      | 0      | 0      | 0      | 0      | 0      | 0      | 0      | 0      | 0      | 0      |
| Macrococcus          | 2              | 60             | 0      | 0      | 0      | 0      | 0      | 0      | 0      | 0      | 0      | 0      | 0      | 0      | 0      | 0      | 0      | 0      | 0      | 0      |
| Magnetococcus        | 2              | 64             | 0      | 0      | 0      | 0      | 0      | 0      | 0      | 0      | 0      | 0      | 0      | 0      | 0      | 0      | 0      | 0      | 0      | 0      |
| Magnetospirillum     | 2              | 113            | 0      | 0      | 0      | 0      | 0      | 0      | 0      | 0      | 0      | 0      | 0      | 0      | 0      | 0      | 0      | 0      | 0      | 0      |
| Mahella              | 2              | 58             | 0      | 0      | 0      | 0      | 0      | 0      | 0      | 0      | 0      | 0      | 0      | 0      | 0      | 0      | 0      | 0      | 0      | 0      |
| Mannheimia           | 2              | 85             | 0      | 0      | 0      | 0      | 0      | 0      | 0      | 0      | 0      | 0      | 0      | 0      | 0      | 0      | 0      | 0      | 0      | 0      |
| Maribacter           | 3              | 87             | 0      | 0      | 0      | 0      | 0      | 0      | 0      | 0      | 0      | 0      | 0      | 0      | 0      | 0      | 0      | 0      | 0      | 0      |
| Maricaulis           | 3              | 87             | 0      | 0      | 0      | 0      | 0      | 0      | 0      | 0      | 0      | 0      | 0      | 0      | 0      | 0      | 0      | 0      | 0      | 0      |
| Marichromatium       | 1              | 2              | 0      | 0      | 0      | 0      | 0      | 0      | 0      | 0      | 0      | 0      | 0      | 0      | 0      | 0      | 0      | 0      | 0      | 0      |
| Marinithermus        | 2              | 77             | 0      | 0      | 0      | 0      | 0      | 0      | 0      | 0      | 0      | 0      | 0      | 0      | 0      | 0      | 0      | 0      | 0      | 0      |
| Marinitoga           | 1              | 15             | 0      | 0      | 0      | 0      | 0      | 0      | 0      | 0      | 0      | 0      | 0      | 0      | 0      | 0      | 0      | 0      | 0      | 0      |
| Marinobacter         | 2              | 163            | 0      | 0      | 0      | 0      | 0      | 0      | 0      | 0      | 0      | 0      | 0      | 0      | 0      | 0      | 0      | 0      | 0      | 0      |
| Marinomonas          | 3              | 192            | 0      | 0      | 0      | 0      | 0      | 0      | 0      | 0      | 0      | 0      | 0      | 0      | 0      | 0      | 0      | 0      | 0      | 0      |
| Maritimibacter       | 1              | 7              | 0      | 0      | 0      | 0      | 0      | 0      | 0      | 0      | 0      | 0      | 0      | 0      | 0      | 0      | 0      | 0      | 0      | 0      |
| Marivirga            | 2              | 96             | 0      | 0      | 0      | 0      | 0      | 0      | 0      | 0      | 0      | 0      | 0      | 0      | 0      | 0      | 0      | 0      | 0      | 0      |
| Martella             | 1              | 3              | 0      | 0      | 0      | 0      | 0      | 0      | 0      | 0      | 0      | 0      | 0      | 0      | 0      | 0      | 0      | 0      | 0      | 0      |
| Marvinbryantia       | 1              | 1              | 0      | 0      | 0      | 0      | 0      | 0      | 0      | 0      | 0      | 0      | 0      | 0      | 0      | 0      | 0      | 0      | 0      | 0      |
| Massilia             | 1              | 4              | 0      | 0      | 0      | 0      | 0      | 0      | 0      | 0      | 0      | 0      | 0      | 0      | 0      | 0      | 0      | 0      | 0      | 0      |
| Mastigocladopsis     | 1              | 16             | 0      | 0      | 0      | 0      | 0      | 0      | 0      | 0      | 0      | 0      | 0      | 0      | 0      | 0      | 0      | 0      | 0      | 0      |
| Megamonas            | 1              | 47             | 0      | 0      | 0      | 0      | 0      | 0      | 0      | 0      | 0      | 0      | 0      | 0      | 0      | 0      | 0      | 0      | 0      | 0      |
| Megasphaera          | 1              | 14             | 0      | 0      | 0      | 0      | 0      | 0      | 0      | 0      | 0      | 0      | 0      | 0      | 0      | 0      | 0      | 0      | 0      | 0      |
| Meiothermus          | 2              | 110            | 0      | 0      | 0      | 0      | 0      | 0      | 0      | 0      | 0      | 0      | 0      | 0      | 0      | 0      | 0      | 0      | 0      | 0      |
| Melissococcus        | 2              | 46             | 0      | 0      | 0      | 0      | 0      | 0      | 0      | 0      | 0      | 0      | 0      | 0      | 0      | 0      | 0      | 0      | 0      | 0      |
| Mesoflavibacter      | 1              | 6              | 0      | 0      | 0      | 0      | 0      | 0      | 0      | 0      | 0      | 0      | 0      | 0      | 0      | 0      | 0      | 0      | 0      | 0      |
| Mesoplasma           | 1              | 23             | 0      | 0      | 0      | 0      | 0      | 0      | 0      | 0      | 0      | 0      | 0      | 0      | 0      | 0      | 0      | 0      | 0      | 0      |
| Mesorhizobium        | 2              | 201            | 0      | 0      | 0      | 0      | 0      | 0      | 0      | 0      | 0      | 0      | 0      | 0      | 0      | 0      | 0      | 0      | 0      | 0      |
| Mesotoga             | 1              | 14             | 0      | 0      | 0      | 0      | 0      | 0      | 0      | 0      | 0      | 0      | 0      | 0      | 0      | 0      | 0      | 0      | 0      | 0      |
| Metallosphaera       | 1              | 18             | 0      | 0      | 0      | 0      | 0      | 0      | 0      | 0      | 0      | 0      | 0      | 0      | 0      | 0      | 0      | 0      | 0      | 0      |
| Methanobacterium     | 1              | 7              | 0      | 0      | 0      | 0      | 0      | 0      | 0      | 0      | 0      | 0      | 0      | 0      | 0      | 0      | 0      | 0      | 0      | 0      |
| Methanobrevibacter   | 1              | 9              | 0      | 0      | 0      | 0      | 0      | 0      | 0      | 0      | 0      | 0      | 0      | 0      | 0      | 0      | 0      | 0      | 0      | 0      |
| Methanocaldococcus   | 1              | 6              | 0      | 0      | 0      | 0      | 0      | 0      | 0      | 0      | 0      | 0      | 0      | 0      | 0      | 0      | 0      | 0      | 0      | 0      |
| Methanocella         | 1              | 15             | 0      | 0      | 0      | 0      | 0      | 0      | 0      | 0      | 0      | 0      | 0      | 0      | 0      | 0      | 0      | 0      | 0      | 0      |
| Methanococcaceae     | 1              | 1              | 0      | 0      | 0      | 0      | 0      | 0      | 0      | 0      | 0      | 0      | 0      | 0      | 0      | 0      | 0      | 0      | 0      | 0      |
| Methanococcoides     | 1              | 5              | 0      | 0      | 0      | 0      | 0      | 0      | 0      | 0      | 0      | 0      | 0      | 0      | 0      | 0      | 0      | 0      | 0      | 0      |
| Methanococcus        | 1              | 9              | 0      | 0      | 0      | 0      | 0      | 0      | 0      | 0      | 0      | 0      | 0      | 0      | 0      | 0      | 0      | 0      | 0      | 0      |
| Methanocorpusculum   | 1              | 7              | 0      | 0      | 0      | 0      | 0      | 0      | 0      | 0      | 0      | 0      | 0      | 0      | 0      | 0      | 0      | 0      | 0      | 0      |
| Methanoculleus       | 1              | 8              | 0      | 0      | 0      | 0      | 0      | 0      | 0      | 0      | 0      | 0      | 0      | 0      | 0      | 0      | 0      | 0      | 0      | 0      |
| Methanohalobium      | 1              | 5              | 0      | 0      | 0      | 0      | 0      | 0      | 0      | 0      | 0      | 0      | 0      | 0      | 0      | 0      | 0      | 0      | 0      | 0      |
| Methanohalophilus    | 1              | 5              | 0      | 0      | 0      | 0      | 0      | 0      | 0      | 0      | 0      | 0      | 0      | 0      | 0      | 0      | 0      | 0      | 0      | 0      |
| Methanolobus         | 1              | 5              | 0      | 0      | 0      | 0      | 0      | 0      | 0      | 0      | 0      | 0      | 0      | 0      | 0      | 0      | 0      | 0      | 0      | 0      |
| Methanomethylovorans | 1              | 5              | 0      | 0      | 0      | 0      | 0      | 0      | 0      | 0      | 0      | 0      | 0      | 0      | 0      | 0      | 0      | 0      | 0      | 0      |
| Methanoplanus        | 1              | 7              | 0      | 0      | 0      | 0      | 0      | 0      | 0      | 0      | 0      | 0      | 0      | 0      | 0      | 0      | 0      | 0      | 0      | 0      |
| Methanopyrus         | 1              | 4              | 0      | 0      | 0      | 0      | 0      | 0      | 0      | 0      | 0      | 0      | 0      | 0      | 0      | 0      | 0      | 0      | 0      | 0      |
| Methanoregula        | 1              | 8              | 0      | 0      | 0      | 0      | 0      | 0      | 0      | 0      | 0      | 0      | 0      | 0      | 0      | 0      | 0      | 0      | 0      | 0      |
| Methanosaeta         | 1              | 9              | 0      | 0      | 0      | 0      | 0      | 0      | 0      | 0      | 0      | 0      | 0      | 0      | 0      | 0      | 0      | 0      | 0      | 0      |
| Methanosalsum        | 1              | 7              | 0      | 0      | 0      | 0      | 0      | 0      | 0      | 0      | 0      | 0      | 0      | 0      | 0      | 0      | 0      | 0      | 0      | 0      |

| Genus               | Cluster Number | Protein Counts | K15061 | K15062 | K15063 | K15064 | K15065 | K15066 | K15236 | K15237 | K15238 | K15242 | K15247 | K15253 | K15749 | K15751 | K15754 | K15756 | K15757 | K15981 |
|---------------------|----------------|----------------|--------|--------|--------|--------|--------|--------|--------|--------|--------|--------|--------|--------|--------|--------|--------|--------|--------|--------|
| Methanosarcina      | 1              | 18             | 0      | 0      | 0      | 0      | 0      | 0      | 0      | 0      | 0      | 0      | 0      | 0      | 0      | 0      | 0      | 0      | 0      | 0      |
| Methanosphaera      | 1              | 7              | 0      | 0      | 0      | 0      | 0      | 0      | 0      | 0      | 0      | 0      | 0      | 0      | 0      | 0      | 0      | 0      | 0      | 0      |
| Methanosphaerula    | 1              | 8              | 0      | 0      | 0      | 0      | 0      | 0      | 0      | 0      | 0      | 0      | 0      | 0      | 0      | 0      | 0      | 0      | 0      | 0      |
| Methanospirillum    | 1              | 6              | 0      | 0      | 0      | 0      | 0      | 0      | 0      | 0      | 0      | 0      | 0      | 0      | 0      | 0      | 0      | 0      | 0      | 0      |
| Methanothermobacter | 1              | 6              | 0      | 0      | 0      | 0      | 0      | 0      | 0      | 0      | 0      | 0      | 0      | 0      | 0      | 0      | 0      | 0      | 0      | 0      |
| Methanothermococcus | 1              | 5              | 0      | 0      | 0      | 0      | 0      | 0      | 0      | 0      | 0      | 0      | 0      | 0      | 0      | 0      | 0      | 0      | 0      | 0      |
| Methanothermus      | 1              | 5              | 0      | 0      | 0      | 0      | 0      | 0      | 0      | 0      | 0      | 0      | 0      | 0      | 0      | 0      | 0      | 0      | 0      | 0      |
| Methanotorris       | 1              | 5              | 0      | 0      | 0      | 0      | 0      | 0      | 0      | 0      | 0      | 0      | 0      | 0      | 0      | 0      | 0      | 0      | 0      | 0      |
| Methylacidiphilum   | 2              | 48             | 0      | 0      | 0      | 0      | 0      | 0      | 0      | 0      | 0      | 0      | 0      | 0      | 0      | 0      | 0      | 0      | 0      | 0      |
| Methylarcula        | 1              | 2              | 0      | 0      | 0      | 0      | 0      | 0      | 0      | 0      | 0      | 0      | 0      | 0      | 0      | 0      | 0      | 0      | 0      | 0      |
| Methylibium         | 1              | 38             | 0      | 0      | 0      | 0      | 0      | 0      | 0      | 0      | 0      | 0      | 0      | 0      | 0      | 0      | 0      | 0      | 0      | 0      |
| Methylobacillus     | 2              | 61             | 0      | 0      | 0      | 0      | 0      | 0      | 0      | 0      | 0      | 0      | 0      | 0      | 0      | 0      | 0      | 0      | 0      | 0      |
| Methylobacterium    | 3              | 236            | 0      | 0      | 0      | 0      | 0      | 0      | 0      | 0      | 0      | 0      | 0      | 0      | 0      | 0      | 0      | 0      | 0      | 0      |
| Methylocella        | 3              | 117            | 0      | 0      | 0      | 0      | 0      | 0      | 0      | 0      | 0      | 0      | 0      | 0      | 0      | 0      | 0      | 0      | 0      | 0      |
| Methylococcus       | 2              | 80             | 0      | 0      | 0      | 0      | 0      | 0      | 0      | 0      | 0      | 0      | 0      | 0      | 0      | 0      | 0      | 0      | 0      | 0      |
| Methylocystis       | 1              | 21             | 0      | 0      | 0      | 0      | 0      | 0      | 0      | 0      | 0      | 0      | 0      | 0      | 0      | 0      | 0      | 0      | 0      | 0      |
| Methyloferula       | 1              | 2              | 0      | 0      | 0      | 0      | 0      | 0      | 0      | 0      | 0      | 0      | 0      | 0      | 0      | 0      | 0      | 0      | 0      | 0      |
| Methylomicrobium    | 1              | 12             | 0      | 0      | 0      | 0      | 0      | 0      | 0      | 0      | 0      | 0      | 0      | 0      | 0      | 0      | 0      | 0      | 0      | 0      |
| Methylomonas        | 1              | 15             | 0      | 0      | 0      | 0      | 0      | 0      | 0      | 0      | 0      | 0      | 0      | 0      | 0      | 0      | 0      | 0      | 0      | 0      |
| Methylophaga        | 1              | 7              | 0      | 0      | 0      | 0      | 0      | 0      | 0      | 0      | 0      | 0      | 0      | 0      | 0      | 0      | 0      | 0      | 0      | 0      |
| Methylophilus       | 1              | 2              | 0      | 0      | 0      | 0      | 0      | 0      | 0      | 0      | 0      | 0      | 0      | 0      | 0      | 0      | 0      | 0      | 0      | 0      |
| Methylosinus        | 1              | 2              | 0      | 0      | 0      | 0      | 0      | 0      | 0      | 0      | 0      | 0      | 0      | 0      | 0      | 0      | 0      | 0      | 0      | 0      |
| Methylotenera       | 2              | 72             | 0      | 0      | 0      | 0      | 0      | 0      | 0      | 0      | 0      | 0      | 0      | 0      | 0      | 0      | 0      | 0      | 0      | 0      |
| Methyloversatilis   | 1              | 5              | 0      | 0      | 0      | 0      | 0      | 0      | 0      | 0      | 0      | 0      | 0      | 0      | 0      | 0      | 0      | 0      | 0      | 0      |
| Methylovorus        | 2              | 66             | 0      | 0      | 0      | 0      | 0      | 0      | 0      | 0      | 0      | 0      | 0      | 0      | 0      | 0      | 0      | 0      | 0      | 0      |
| Micavibrio          | 1              | 9              | 0      | 0      | 0      | 0      | 0      | 0      | 0      | 0      | 0      | 0      | 0      | 0      | 0      | 0      | 0      | 0      | 0      | 0      |
| Microbacterium      | 2              | 115            | 0      | 0      | 0      | 0      | 0      | 0      | 0      | 0      | 0      | 0      | 0      | 0      | 0      | 0      | 0      | 0      | 0      | 0      |
| Microchaete         | 1              | 23             | 0      | 0      | 0      | 0      | 0      | 0      | 0      | 0      | 0      | 0      | 0      | 0      | 0      | 0      | 0      | 0      | 0      | 0      |
| Micrococcus         | 2              | 72             | 0      | 0      | 0      | 0      | 0      | 0      | 0      | 0      | 0      | 0      | 0      | 0      | 0      | 0      | 0      | 0      | 0      | 0      |
| Microcoleus         | 1              | 17             | 0      | 0      | 0      | 0      | 0      | 0      | 0      | 0      | 0      | 0      | 0      | 0      | 0      | 0      | 0      | 0      | 0      | 0      |
| Microcystis         | 2              | 67             | 0      | 0      | 0      | 0      | 0      | 0      | 0      | 0      | 0      | 0      | 0      | 0      | 0      | 0      | 0      | 0      | 0      | 0      |
| Microlunatus        | 1              | 25             | 0      | 0      | 0      | 0      | 0      | 0      | 0      | 0      | 0      | 0      | 0      | 0      | 0      | 0      | 0      | 0      | 0      | 0      |
| Micromonospora      | 2              | 115            | 0      | 0      | 0      | 0      | 0      | 0      | 0      | 0      | 0      | 0      | 0      | 0      | 0      | 0      | 0      | 0      | 0      | 0      |
| Microvirga          | 1              | 6              | 0      | 0      | 0      | 0      | 0      | 0      | 0      | 0      | 0      | 0      | 0      | 0      | 0      | 0      | 0      | 0      | 0      | 0      |
| Mobiluncus          | 1              | 41             | 0      | 0      | 0      | 0      | 0      | 0      | 0      | 0      | 0      | 0      | 0      | 0      | 0      | 0      | 0      | 0      | 0      | 0      |
| Modestobacter       | 1              | 43             | 0      | 0      | 0      | 0      | 0      | 1      | 0      | 0      | 0      | 0      | 0      | 0      | 0      | 0      | 0      | 0      | 0      | 0      |
| Moorea              | 1              | 2              | 0      | 0      | 0      | 0      | 0      | 0      | 0      | 0      | 0      | 0      | 0      | 0      | 0      | 0      | 0      | 0      | 0      | 0      |
| Moorella            | 2              | 69             | 0      | 0      | 0      | 0      | 0      | 0      | 0      | 0      | 0      | 0      | 0      | 0      | 0      | 0      | 0      | 0      | 0      | 0      |
| Moraxella           | 2              | 66             | 0      | 0      | 0      | 0      | 0      | 0      | 0      | 0      | 0      | 0      | 0      | 0      | 0      | 0      | 0      | 0      | 0      | 0      |
| Morganella          | 1              | 29             | 0      | 0      | 0      | 0      | 0      | 0      | 0      | 0      | 0      | 0      | 0      | 0      | 0      | 0      | 0      | 0      | 0      | 0      |
| Moritella           | 1              | 2              | 0      | 0      | 0      | 0      | 0      | 0      | 0      | 0      | 0      | 0      | 0      | 0      | 0      | 0      | 0      | 0      | 0      | 0      |
| Muricauda           | 1              | 23             | 0      | 0      | 0      | 0      | 0      | 0      | 0      | 0      | 0      | 0      | 0      | 0      | 0      | 0      | 0      | 0      | 0      | 0      |
| Mycobacterium       | 3              | 306            | 0      | 0      | 0      | 0      | 0      | 0      | 0      | 0      | 0      | 0      | 0      | 0      | 0      | 0      | 0      | 0      | 0      | 1      |
| Mycoplasma          | 1              | 53             | 0      | 0      | 0      | 0      | 0      | 0      | 0      | 0      | 0      | 0      | 0      | 0      | 0      | 0      | 0      | 0      | 0      | 0      |
| Myxococcus          | 2              | 110            | 0      | 0      | 0      | 0      | 0      | 0      | 0      | 0      | 0      | 0      | 0      | 0      | 0      | 0      | 0      | 0      | 0      | 0      |
| Nakamurella         | 2              | 115            | 0      | 0      | 0      | 0      | 0      | 0      | 0      | 0      | 0      | 0      | 0      | 0      | 0      | 0      | 0      | 0      | 0      | 0      |
| napthalene          | 1              | 2              | 0      | 0      | 0      | 0      | 0      | 0      | 0      | 0      | 0      | 0      | 0      | 0      | 0      | 0      | 0      | 0      | 0      | 0      |
| Natranaerobius      | 2              | 55             | 0      | 0      | 0      | 0      | 0      | 0      | 0      | 0      | 0      | 0      | 0      | 0      | 0      | 0      | 0      | 0      | 0      | 0      |
| Natrialba           | 1              | 16             | 0      | 0      | 0      | 0      | 0      | 0      | 0      | 0      | 0      | 0      | 0      | 0      | 0      | 0      | 0      | 0      | 0      | 0      |
| Natrinema           | 1              | 16             | 0      | 0      | 0      | 0      | 0      | 0      | 0      | 0      | 0      | 0      | 0      | 0      | 0      | 0      | 0      | 0      | 0      | 0      |
| Natronobacterium    | 1              | 11             | 0      | 0      | 0      | 0      | 0      | 0      | 0      | 0      | 0      | 0      | 0      | 0      | 0      | 0      | 0      | 0      | 0      | 0      |
| Natronococcus       | 1              | 21             | 0      | 0      | 0      | 0      | 0      | 0      | 0      | 0      | 0      | 0      | 0      | 0      | 0      | 0      | 0      | 0      | 0      | 0      |

| Genus             | Cluster Number | Protein Counts | K15061 | K15062 | K15063 | K15064 | K15065 | K15066 | K15236 | K15237 | K15238 | K15242 | K15247 | K15253 | K15749 | K15751 | K15754 | K15756 | K15757 | K15981 |
|-------------------|----------------|----------------|--------|--------|--------|--------|--------|--------|--------|--------|--------|--------|--------|--------|--------|--------|--------|--------|--------|--------|
| Natronomonas      | 1              | 20             | 0      | 0      | 0      | 0      | 0      | 0      | 0      | 0      | 0      | 0      | 0      | 0      | 0      | 0      | 0      | 0      | 0      | 0      |
| Nautilia          | 2              | 48             | 0      | 0      | 0      | 0      | 0      | 0      | 0      | 0      | 0      | 0      | 0      | 0      | 0      | 0      | 0      | 0      | 0      | 0      |
| Neisseria         | 2              | 67             | 0      | 0      | 0      | 0      | 0      | 0      | 0      | 0      | 0      | 0      | 0      | 0      | 0      | 0      | 0      | 0      | 0      | 0      |
| Neisseriaceae     | 1              | 1              | 0      | 0      | 0      | 0      | 0      | 0      | 0      | 0      | 0      | 0      | 0      | 0      | 0      | 0      | 0      | 0      | 0      | 0      |
| Neorickettsia     | 1              | 31             | 0      | 0      | 0      | 0      | 0      | 0      | 0      | 0      | 0      | 0      | 0      | 0      | 0      | 0      | 0      | 0      | 0      | 0      |
| Neptuniibacter    | 1              | 2              | 0      | 0      | 0      | 0      | 0      | 0      | 0      | 0      | 0      | 0      | 0      | 0      | 0      | 0      | 0      | 0      | 0      | 0      |
| Niastella         | 1              | 21             | 0      | 0      | 0      | 0      | 0      | 0      | 0      | 0      | 0      | 0      | 0      | 0      | 0      | 0      | 0      | 0      | 0      | 0      |
| Nitratifractor    | 2              | 54             | 0      | 0      | 0      | 0      | 0      | 0      | 0      | 0      | 0      | 0      | 0      | 0      | 0      | 0      | 0      | 0      | 0      | 0      |
| Nitratireductor   | 1              | 19             | 0      | 0      | 0      | 0      | 0      | 0      | 0      | 0      | 0      | 0      | 0      | 0      | 0      | 0      | 0      | 0      | 0      | 0      |
| Nitratiruptor     | 2              | 40             | 0      | 0      | 0      | 0      | 0      | 0      | 0      | 0      | 0      | 0      | 0      | 0      | 0      | 0      | 0      | 0      | 0      | 0      |
| Nitrobacter       | 2              | 99             | 0      | 0      | 0      | 0      | 0      | 0      | 0      | 0      | 0      | 0      | 0      | 0      | 0      | 0      | 0      | 0      | 0      | 0      |
| Nitrococcus       | 1              | 2              | 0      | 0      | 0      | 0      | 0      | 0      | 0      | 0      | 0      | 0      | 0      | 0      | 0      | 0      | 0      | 0      | 0      | 0      |
| Nitrosococcus     | 2              | 94             | 0      | 0      | 0      | 0      | 0      | 0      | 0      | 0      | 0      | 0      | 0      | 0      | 0      | 0      | 0      | 0      | 0      | 0      |
| Nitrosomonas      | 2              | 72             | 0      | 0      | 0      | 0      | 0      | 0      | 0      | 0      | 0      | 0      | 0      | 0      | 0      | 0      | 0      | 0      | 0      | 0      |
| Nitrosopumilaceae | 1              | 7              | 0      | 0      | 0      | 0      | 0      | 0      | 0      | 0      | 0      | 0      | 0      | 0      | 0      | 0      | 0      | 0      | 0      | 0      |
| Nitrosopumilus    | 1              | 11             | 0      | 0      | 0      | 0      | 0      | 0      | 0      | 0      | 0      | 0      | 0      | 0      | 0      | 0      | 0      | 0      | 0      | 0      |
| Nitrospira        | 2              | 74             | 0      | 0      | 0      | 0      | 0      | 0      | 0      | 0      | 0      | 0      | 0      | 0      | 0      | 0      | 0      | 0      | 0      | 0      |
| Nocardia          | 2              | 185            | 0      | 0      | 0      | 0      | 0      | 0      | 0      | 0      | 0      | 0      | 0      | 0      | 0      | 0      | 0      | 0      | 0      | 1      |
| Nocardioidaceae   | 1              | 2              | 0      | 0      | 0      | 0      | 0      | 0      | 0      | 0      | 0      | 0      | 0      | 0      | 0      | 0      | 0      | 0      | 0      | 0      |
| Nocardioides      | 2              | 157            | 0      | 0      | 0      | 0      | 0      | 0      | 0      | 0      | 0      | 0      | 0      | 0      | 0      | 0      | 0      | 0      | 0      | 1      |
| Nocardiopsis      | 2              | 102            | 0      | 0      | 0      | 0      | 0      | 0      | 0      | 0      | 0      | 0      | 0      | 0      | 0      | 0      | 0      | 0      | 0      | 0      |
| Nodularia         | 1              | 22             | 0      | 0      | 0      | 0      | 0      | 0      | 0      | 0      | 0      | 0      | 0      | 0      | 0      | 0      | 0      | 0      | 0      | 0      |
| Nonlabens         | 1              | 19             | 0      | 0      | 0      | 0      | 0      | 0      | 0      | 0      | 0      | 0      | 0      | 0      | 0      | 0      | 0      | 0      | 0      | 0      |
| Nostoc            | 2              | 111            | 0      | 0      | 0      | 0      | 0      | 0      | 0      | 0      | 0      | 0      | 0      | 0      | 0      | 0      | 0      | 0      | 0      | 0      |
| Nostocaceae       | 1              | 2              | 0      | 0      | 0      | 0      | 0      | 0      | 0      | 0      | 0      | 0      | 0      | 0      | 0      | 0      | 0      | 0      | 0      | 0      |
| Novosphingobium   | 2              | 169            | 0      | 0      | 0      | 1      | 0      | 1      | 0      | 0      | 0      | 0      | 0      | 0      | 0      | 0      | 0      | 0      | 0      | 0      |
| Oceanibaculum     | 1              | 3              | 0      | 0      | 0      | 0      | 0      | 0      | 0      | 0      | 0      | 0      | 0      | 0      | 0      | 0      | 0      | 0      | 0      | 0      |
| Oceanibulbus      | 1              | 12             | 0      | 0      | 0      | 0      | 0      | 0      | 0      | 0      | 0      | 0      | 0      | 0      | 0      | 0      | 0      | 0      | 0      | 0      |
| Oceanicola        | 1              | 9              | 0      | 0      | 0      | 0      | 0      | 0      | 0      | 0      | 0      | 0      | 0      | 0      | 0      | 0      | 0      | 0      | 0      | 0      |
| Oceanimonas       | 1              | 33             | 0      | 0      | 0      | 0      | 0      | 0      | 0      | 0      | 0      | 0      | 0      | 0      | 0      | 0      | 0      | 0      | 0      | 0      |
| Oceaniovalibus    | 1              | 2              | 0      | 0      | 0      | 0      | 0      | 0      | 0      | 0      | 0      | 0      | 0      | 0      | 0      | 0      | 0      | 0      | 0      | 0      |
| Oceanithermus     | 2              | 72             | 0      | 0      | 0      | 0      | 0      | 0      | 0      | 0      | 0      | 0      | 0      | 0      | 0      | 0      | 0      | 0      | 0      | 0      |
| Oceanobacillus    | 2              | 91             | 0      | 0      | 0      | 0      | 0      | 0      | 0      | 0      | 0      | 0      | 0      | 0      | 0      | 0      | 0      | 0      | 0      | 0      |
| Oceanospirillum   | 1              | 2              | 0      | 0      | 0      | 0      | 0      | 0      | 0      | 0      | 0      | 0      | 0      | 0      | 0      | 0      | 0      | 0      | 0      | 0      |
| Ochrobactrum      | 2              | 133            | 0      | 0      | 0      | 0      | 0      | 0      | 0      | 0      | 0      | 0      | 0      | 0      | 0      | 0      | 0      | 0      | 0      | 0      |
| Octadecabacter    | 1              | 29             | 0      | 0      | 0      | 0      | 0      | 0      | 0      | 0      | 0      | 0      | 0      | 0      | 0      | 0      | 0      | 0      | 0      | 0      |
| Oenococcus        | 2              | 41             | 0      | 0      | 0      | 0      | 0      | 0      | 0      | 0      | 0      | 0      | 0      | 0      | 0      | 0      | 0      | 0      | 0      | 0      |
| Oleomonas         | 1              | 2              | 0      | 0      | 0      | 0      | 0      | 0      | 0      | 0      | 0      | 0      | 0      | 0      | 0      | 0      | 0      | 0      | 0      | 0      |
| Oligotropha       | 3              | 87             | 0      | 0      | 0      | 0      | 0      | 0      | 0      | 0      | 0      | 0      | 0      | 0      | 0      | 0      | 0      | 0      | 0      | 0      |
| Olsenella         | 2              | 40             | 0      | 0      | 0      | 0      | 0      | 0      | 0      | 0      | 0      | 0      | 0      | 0      | 0      | 0      | 0      | 0      | 0      | 0      |
| Opitutus          | 2              | 67             | 0      | 0      | 0      | 0      | 0      | 0      | 0      | 0      | 0      | 0      | 0      | 0      | 0      | 0      | 0      | 0      | 0      | 0      |
| Orientia          | 1              | 21             | 0      | 0      | 0      | 0      | 0      | 0      | 0      | 0      | 0      | 0      | 0      | 0      | 0      | 0      | 0      | 0      | 0      | 0      |
| Ornithobacterium  | 1              | 11             | 0      | 0      | 0      | 0      | 0      | 0      | 0      | 0      | 0      | 0      | 0      | 0      | 0      | 0      | 0      | 0      | 0      | 0      |
| Oscillatoria      | 1              | 16             | 0      | 0      | 0      | 0      | 0      | 0      | 0      | 0      | 0      | 0      | 0      | 0      | 0      | 0      | 0      | 0      | 0      | 0      |
| Oscillatoriales   | 1              | 2              | 0      | 0      | 0      | 0      | 0      | 0      | 0      | 0      | 0      | 0      | 0      | 0      | 0      | 0      | 0      | 0      | 0      | 0      |
| Oscillibacter     | 1              | 20             | 0      | 0      | 0      | 0      | 0      | 0      | 0      | 0      | 0      | 0      | 0      | 0      | 0      | 0      | 0      | 0      | 0      | 0      |
| Owenweeksia       | 1              | 15             | 0      | 0      | 0      | 0      | 0      | 0      | 0      | 0      | 0      | 0      | 0      | 0      | 0      | 0      | 0      | 0      | 0      | 0      |
| Oxalobacteraceae  | 1              | 4              | 0      | 0      | 0      | 0      | 0      | 0      | 0      | 0      | 0      | 0      | 0      | 0      | 0      | 0      | 0      | 0      | 0      | 0      |
| Paenibacillus     | 2              | 152            | 0      | 0      | 0      | 0      | 0      | 0      | 0      | 0      | 0      | 0      | 0      | 0      | 0      | 0      | 0      | 0      | 0      | 0      |
| Paludibacter      | 2              | 67             | 0      | 0      | 0      | 0      | 0      | 0      | 0      | 0      | 0      | 0      | 0      | 0      | 0      | 0      | 0      | 0      | 0      | 0      |
| Pandoraea         | 1              | 18             | 0      | 0      | 0      | 0      | 0      | 0      | 0      | 0      | 0      | 0      | 0      | 0      | 0      | 0      | 0      | 0      | 0      | 0      |
| Pannonibacter     | 1              | 3              | 0      | 0      | 0      | 0      | 0      | 0      | 0      | 0      | 0      | 0      | 0      | 0      | 0      | 0      | 0      | 0      | 0      | 0      |

| Genus              | Cluster Number | Protein Counts | K15061 | K15062 | K15063 | K15064 | K15065 | K15066 | K15236 | K15237 | K15238 | K15242 | K15247 | K15253 | K15749 | K15751 | K15754 | K15756 | K15757 | K15981 |
|--------------------|----------------|----------------|--------|--------|--------|--------|--------|--------|--------|--------|--------|--------|--------|--------|--------|--------|--------|--------|--------|--------|
| Pantholops         | 1              | 23             | 0      | 0      | 0      | 0      | 0      | 0      | 0      | 0      | 0      | 0      | 0      | 0      | 0      | 0      | 0      | 0      | 0      | 0      |
| Pantoea            | 2              | 181            | 0      | 0      | 0      | 0      | 0      | 0      | 0      | 0      | 0      | 0      | 0      | 0      | 0      | 0      | 0      | 0      | 0      | 0      |
| Parabacteroides    | 2              | 64             | 0      | 0      | 0      | 0      | 0      | 0      | 0      | 0      | 0      | 0      | 0      | 0      | 0      | 0      | 0      | 0      | 0      | 0      |
| Parachlamydia      | 1              | 11             | 0      | 0      | 0      | 0      | 0      | 0      | 0      | 0      | 0      | 0      | 0      | 0      | 0      | 0      | 0      | 0      | 0      | 0      |
| Paracoccus         | 2              | 169            | 0      | 0      | 0      | 0      | 0      | 0      | 0      | 0      | 0      | 0      | 0      | 0      | 0      | 0      | 0      | 0      | 0      | 0      |
| Parvibaculum       | 3              | 117            | 0      | 0      | 0      | 0      | 0      | 0      | 0      | 0      | 0      | 0      | 0      | 0      | 0      | 0      | 0      | 0      | 0      | 0      |
| Parvularcula       | 2              | 72             | 0      | 0      | 0      | 0      | 0      | 0      | 0      | 0      | 0      | 0      | 0      | 0      | 0      | 0      | 0      | 0      | 0      | 0      |
| Pasteurella        | 2              | 85             | 0      | 0      | 0      | 0      | 0      | 0      | 0      | 0      | 0      | 0      | 0      | 0      | 0      | 0      | 0      | 0      | 0      | 0      |
| Pasteurellaceae    | 1              | 2              | 0      | 0      | 0      | 0      | 0      | 0      | 0      | 0      | 0      | 0      | 0      | 0      | 0      | 0      | 0      | 0      | 0      | 0      |
| Pectobacterium     | 1              | 44             | 0      | 0      | 0      | 0      | 0      | 0      | 0      | 0      | 0      | 0      | 0      | 0      | 0      | 0      | 0      | 0      | 0      | 0      |
| Pediococcus        | 1              | 43             | 0      | 0      | 0      | 0      | 0      | 0      | 0      | 0      | 0      | 0      | 0      | 0      | 0      | 0      | 0      | 0      | 0      | 0      |
| Pedobacter         | 2              | 88             | 0      | 0      | 0      | 0      | 0      | 0      | 0      | 0      | 0      | 0      | 0      | 0      | 0      | 0      | 0      | 0      | 0      | 0      |
| Pelagibaca         | 1              | 10             | 0      | 0      | 0      | 0      | 0      | 0      | 0      | 0      | 0      | 0      | 0      | 0      | 0      | 0      | 0      | 0      | 0      | 0      |
| Pelagibacterium    | 1              | 39             | 0      | 0      | 0      | 0      | 0      | 0      | 0      | 0      | 0      | 0      | 0      | 0      | 0      | 0      | 0      | 0      | 0      | 0      |
| Pelobacter         | 2              | 85             | 0      | 0      | 0      | 0      | 0      | 0      | 0      | 0      | 0      | 0      | 0      | 0      | 0      | 0      | 0      | 0      | 0      | 0      |
| Pelodictyon        | 2              | 62             | 0      | 0      | 0      | 0      | 0      | 0      | 0      | 0      | 0      | 0      | 0      | 0      | 0      | 0      | 0      | 0      | 0      | 0      |
| Pelosinus          | 1              | 1              | 0      | 0      | 0      | 0      | 0      | 0      | 0      | 0      | 0      | 0      | 0      | 0      | 0      | 0      | 0      | 0      | 0      | 0      |
| Pelotomaculum      | 2              | 60             | 0      | 0      | 0      | 0      | 0      | 0      | 0      | 0      | 0      | 0      | 0      | 0      | 0      | 0      | 0      | 0      | 0      | 0      |
| Peptostreptococcus | 1              | 1              | 0      | 0      | 0      | 0      | 0      | 0      | 0      | 0      | 0      | 0      | 0      | 0      | 0      | 0      | 0      | 0      | 0      | 0      |
| Persephonella      | 2              | 55             | 0      | 0      | 0      | 0      | 0      | 0      | 0      | 0      | 0      | 0      | 0      | 0      | 0      | 0      | 0      | 0      | 0      | 0      |
| Petrotoga          | 2              | 72             | 0      | 0      | 0      | 0      | 0      | 0      | 0      | 0      | 0      | 0      | 0      | 0      | 0      | 0      | 0      | 0      | 0      | 0      |
| Phaeobacter        | 2              | 55             | 0      | 0      | 0      | 0      | 0      | 0      | 0      | 0      | 0      | 0      | 0      | 0      | 0      | 0      | 0      | 0      | 0      | 0      |
| Phenylobacterium   | 3              | 103            | 0      | 0      | 0      | 0      | 0      | 0      | 0      | 0      | 0      | 0      | 0      | 0      | 0      | 0      | 0      | 0      | 0      | 0      |
| Photobacterium     | 2              | 119            | 0      | 0      | 0      | 0      | 0      | 0      | 0      | 0      | 0      | 0      | 0      | 0      | 0      | 0      | 0      | 0      | 0      | 0      |
| Photorhabdus       | 2              | 149            | 0      | 0      | 0      | 0      | 0      | 0      | 0      | 0      | 0      | 0      | 0      | 0      | 0      | 0      | 0      | 0      | 0      | 0      |
| Phycisphaera       | 1              | 9              | 0      | 0      | 0      | 0      | 0      | 0      | 0      | 0      | 0      | 0      | 0      | 0      | 0      | 0      | 0      | 0      | 0      | 0      |
| Phyllobacterium    | 1              | 6              | 0      | 0      | 0      | 0      | 0      | 0      | 0      | 0      | 0      | 0      | 0      | 0      | 0      | 0      | 0      | 0      | 0      | 0      |
| Picrophilus        | 1              | 15             | 0      | 0      | 0      | 0      | 0      | 0      | 0      | 0      | 0      | 0      | 0      | 0      | 0      | 0      | 0      | 0      | 0      | 0      |
| Pirellula          | 2              | 85             | 0      | 0      | 0      | 0      | 0      | 0      | 0      | 0      | 0      | 0      | 0      | 0      | 0      | 0      | 0      | 0      | 0      | 0      |
| Planctomyces       | 2              | 93             | 0      | 0      | 0      | 0      | 0      | 0      | 0      | 0      | 0      | 0      | 0      | 0      | 0      | 0      | 0      | 0      | 0      | 0      |
| Plautia            | 1              | 17             | 0      | 0      | 0      | 0      | 0      | 0      | 0      | 0      | 0      | 0      | 0      | 0      | 0      | 0      | 0      | 0      | 0      | 0      |
| Plesiomonas        | 1              | 4              | 0      | 0      | 0      | 0      | 0      | 0      | 0      | 0      | 0      | 0      | 0      | 0      | 0      | 0      | 0      | 0      | 0      | 0      |
| Pleurocapsa        | 1              | 23             | 0      | 0      | 0      | 0      | 0      | 0      | 0      | 0      | 0      | 0      | 0      | 0      | 0      | 0      | 0      | 0      | 0      | 0      |
| Polaribacter       | 2              | 74             | 0      | 0      | 0      | 0      | 0      | 0      | 0      | 0      | 0      | 0      | 0      | 0      | 0      | 0      | 0      | 0      | 0      | 0      |
| Polaromonas        | 3              | 238            | 0      | 0      | 0      | 0      | 0      | 0      | 0      | 0      | 0      | 0      | 0      | 0      | 0      | 0      | 0      | 0      | 0      | 0      |
| Polymorphum        | 3              | 173            | 0      | 0      | 0      | 0      | 0      | 0      | 0      | 0      | 0      | 0      | 0      | 0      | 0      | 0      | 0      | 0      | 0      | 0      |
| Polynucleobacter   | 1              | 19             | 0      | 0      | 0      | 0      | 0      | 0      | 0      | 0      | 0      | 0      | 0      | 0      | 0      | 0      | 0      | 0      | 0      | 0      |
| Ponticaulis        | 1              | 1              | 0      | 0      | 0      | 0      | 0      | 0      | 0      | 0      | 0      | 0      | 0      | 0      | 0      | 0      | 0      | 0      | 0      | 0      |
| Porphyromonas      | 2              | 63             | 0      | 0      | 0      | 0      | 0      | 0      | 0      | 0      | 0      | 0      | 0      | 0      | 0      | 0      | 0      | 0      | 0      | 0      |
| Prevotella         | 1              | 65             | 0      | 0      | 0      | 0      | 0      | 0      | 0      | 0      | 0      | 0      | 0      | 0      | 0      | 0      | 0      | 0      | 0      | 0      |
| Prochlorococcus    | 2              | 68             | 0      | 0      | 0      | 0      | 0      | 0      | 0      | 0      | 0      | 0      | 0      | 0      | 0      | 0      | 0      | 0      | 0      | 0      |
| Propionibacterium  | 1              | 62             | 0      | 0      | 0      | 0      | 0      | 0      | 0      | 0      | 0      | 0      | 0      | 0      | 0      | 0      | 0      | 0      | 0      | 0      |
| Prosthecochloris   | 1              | 16             | 0      | 0      | 0      | 0      | 0      | 0      | 0      | 0      | 0      | 0      | 0      | 0      | 0      | 0      | 0      | 0      | 0      | 0      |
| Proteobacteria     | 1              | 19             | 0      | 0      | 0      | 0      | 0      | 0      | 0      | 0      | 0      | 0      | 0      | 0      | 0      | 0      | 0      | 0      | 0      | 0      |
| Proteus            | 2              | 113            | 0      | 0      | 0      | 0      | 0      | 0      | 0      | 0      | 0      | 0      | 0      | 0      | 0      | 0      | 0      | 0      | 0      | 0      |
| Providencia        | 1              | 38             | 0      | 0      | 0      | 0      | 0      | 0      | 0      | 0      | 0      | 0      | 0      | 0      | 0      | 0      | 0      | 0      | 0      | 0      |
| Pseudaminobacter   | 1              | 10             | 0      | 0      | 0      | 0      | 0      | 0      | 0      | 0      | 0      | 0      | 0      | 0      | 0      | 0      | 0      | 0      | 0      | 0      |
| Pseudanabaena      | 1              | 11             | 0      | 0      | 0      | 0      | 0      | 0      | 0      | 0      | 0      | 0      | 0      | 0      | 0      | 0      | 0      | 0      | 0      | 0      |
| Pseudoalteromonas  | 2              | 188            | 0      | 0      | 0      | 0      | 0      | 0      | 0      | 0      | 0      | 0      | 0      | 0      | 0      | 0      | 0      | 0      | 0      | 0      |
| Pseudochrobactrum  | 1              | 7              | 0      | 0      | 0      | 0      | 0      | 0      | 0      | 0      | 0      | 0      | 0      | 0      | 0      | 0      | 0      | 0      | 0      | 0      |
| Pseudogulbenkiania | 1              | 40             | 0      | 0      | 0      | 0      | 0      | 0      | 0      | 0      | 0      | 0      | 0      | 0      | 0      | 0      | 0      | 0      | 0      | 0      |
| pseudomallei       | 3              | 131            | 0      | 0      | 0      | 0      | 0      | 0      | 0      | 0      | 0      | 0      | 0      | 0      | 0      | 0      | 0      | 0      | 0      | 0      |

| Genus                   | Cluster Number | Protein Counts | K15061 | K15062 | K15063 | K15064 | K15065 | K15066 | K15236 | K15237 | K15238 | K15242 | K15247 | K15253 | K15749 | K15751 | K15754 | K15756 | K15757 | K15981 |
|-------------------------|----------------|----------------|--------|--------|--------|--------|--------|--------|--------|--------|--------|--------|--------|--------|--------|--------|--------|--------|--------|--------|
| Pseudomonas             | 3              | 381            | 0      | 0      | 0      | 0      | 0      | 0      | 0      | 0      | 0      | 0      | 0      | 1      | 0      | 0      | 0      | 0      | 0      | 0      |
| Pseudonocardia          | 3              | 180            | 0      | 0      | 0      | 0      | 0      | 1      | 0      | 0      | 0      | 0      | 0      | 0      | 0      | 0      | 0      | 0      | 0      | 0      |
| Pseudorhodobacter       | 1              | 4              | 0      | 0      | 0      | 0      | 0      | 0      | 0      | 0      | 0      | 0      | 0      | 0      | 0      | 0      | 0      | 0      | 0      | 0      |
| Pseudovibrio            | 1              | 33             | 0      | 0      | 0      | 0      | 0      | 0      | 0      | 0      | 0      | 0      | 0      | 0      | 0      | 0      | 0      | 0      | 0      | 0      |
| Pseudoxanthomonas       | 2              | 124            | 0      | 0      | 0      | 0      | 0      | 0      | 0      | 0      | 0      | 0      | 0      | 0      | 0      | 1      | 1      | 1      | 1      | 0      |
| Psychrobacter           | 2              | 124            | 0      | 0      | 0      | 0      | 0      | 0      | 0      | 0      | 0      | 0      | 0      | 0      | 0      | 0      | 0      | 0      | 0      | 0      |
| Psychroflexus           | 1              | 22             | 0      | 0      | 0      | 0      | 0      | 0      | 0      | 0      | 0      | 0      | 0      | 0      | 0      | 0      | 0      | 0      | 0      | 0      |
| Psychromonas            | 2              | 110            | 0      | 0      | 0      | 0      | 0      | 0      | 0      | 0      | 0      | 0      | 0      | 0      | 0      | 0      | 0      | 0      | 0      | 0      |
| Pusillimonas            | 3              | 111            | 0      | 0      | 0      | 0      | 0      | 0      | 0      | 0      | 0      | 0      | 0      | 0      | 0      | 0      | 0      | 0      | 0      | 0      |
| Pyrobaculum             | 1              | 15             | 0      | 0      | 0      | 0      | 0      | 0      | 0      | 0      | 0      | 0      | 0      | 0      | 0      | 0      | 0      | 0      | 0      | 0      |
| Pyrococcus              | 1              | 10             | 0      | 0      | 0      | 0      | 0      | 0      | 0      | 0      | 0      | 0      | 0      | 0      | 0      | 0      | 0      | 0      | 0      | 0      |
| Pyrolobus               | 1              | 4              | 0      | 0      | 0      | 0      | 0      | 0      | 0      | 0      | 0      | 0      | 0      | 0      | 0      | 0      | 0      | 0      | 0      | 0      |
| Rahnella                | 2              | 143            | 0      | 0      | 0      | 0      | 0      | 0      | 0      | 0      | 0      | 0      | 0      | 0      | 0      | 0      | 0      | 0      | 0      | 0      |
| Ralstonia               | 3              | 332            | 0      | 0      | 0      | 0      | 1      | 0      | 0      | 0      | 0      | 0      | 1      | 1      | 0      | 0      | 0      | 0      | 0      | 0      |
| Ramlibacter             | 1              | 35             | 0      | 0      | 0      | 0      | 0      | 0      | 0      | 0      | 0      | 0      | 0      | 0      | 0      | 0      | 0      | 0      | 0      | 0      |
| Raoultella              | 2              | 139            | 0      | 0      | 0      | 0      | 0      | 0      | 0      | 0      | 0      | 0      | 0      | 0      | 0      | 0      | 0      | 0      | 0      | 0      |
| Raphidiopsis            | 1              | 5              | 0      | 0      | 0      | 0      | 0      | 0      | 0      | 0      | 0      | 0      | 0      | 0      | 0      | 0      | 0      | 0      | 0      | 0      |
| Reinekea                | 1              | 2              | 0      | 0      | 0      | 0      | 0      | 0      | 0      | 0      | 0      | 0      | 0      | 0      | 0      | 0      | 0      | 0      | 0      | 0      |
| Renibacterium           | 2              | 67             | 0      | 0      | 0      | 0      | 0      | 0      | 0      | 0      | 0      | 0      | 0      | 0      | 0      | 0      | 0      | 0      | 0      | 0      |
| Rhizobiaceae            | 1              | 3              | 0      | 0      | 0      | 0      | 0      | 0      | 0      | 0      | 0      | 0      | 0      | 0      | 0      | 0      | 0      | 0      | 0      | 0      |
| Rhizobiales             | 1              | 6              | 0      | 0      | 0      | 0      | 0      | 0      | 0      | 0      | 0      | 0      | 0      | 0      | 0      | 0      | 0      | 0      | 0      | 0      |
| Rhizobium               | 3              | 257            | 0      | 0      | 0      | 0      | 0      | 1      | 0      | 0      | 0      | 0      | 0      | 0      | 0      | 0      | 0      | 0      | 0      | 0      |
| Rhizobium/Agrobacterium | 2              | 87             | 0      | 0      | 0      | 0      | 0      | 0      | 0      | 0      | 0      | 0      | 0      | 0      | 0      | 0      | 0      | 0      | 0      | 0      |
| Rhodanobacter           | 1              | 21             | 0      | 0      | 0      | 0      | 0      | 0      | 1      | 0      | 0      | 0      | 0      | 0      | 0      | 0      | 0      | 0      | 0      | 0      |
| Rhodobacter             | 3              | 175            | 0      | 0      | 0      | 0      | 0      | 0      | 0      | 0      | 0      | 0      | 0      | 0      | 0      | 0      | 0      | 0      | 0      | 0      |
| Rhodobacteraceae        | 1              | 21             | 0      | 0      | 0      | 0      | 0      | 0      | 0      | 0      | 0      | 0      | 0      | 0      | 0      | 0      | 0      | 0      | 0      | 0      |
| Rhodobacterales         | 1              | 34             | 0      | 0      | 0      | 0      | 0      | 0      | 0      | 0      | 0      | 0      | 0      | 0      | 0      | 0      | 0      | 0      | 0      | 0      |
| Rhodococcus             | 2              | 292            | 0      | 0      | 0      | 0      | 0      | 0      | 0      | 0      | 0      | 0      | 0      | 0      | 0      | 0      | 0      | 0      | 0      | 1      |
| Rhodocyclaceae          | 1              | 7              | 0      | 0      | 0      | 0      | 0      | 0      | 0      | 0      | 0      | 0      | 0      | 0      | 0      | 0      | 0      | 0      | 0      | 0      |
| Rhodoferax              | 3              | 144            | 0      | 0      | 0      | 0      | 0      | 0      | 0      | 0      | 0      | 0      | 0      | 0      | 0      | 0      | 0      | 0      | 0      | 0      |
| Rhodomicrobium          | 2              | 103            | 0      | 0      | 0      | 0      | 0      | 0      | 0      | 0      | 0      | 0      | 0      | 0      | 0      | 0      | 0      | 0      | 0      | 0      |
| Rhodopirellula          | 2              | 87             | 0      | 0      | 0      | 0      | 0      | 0      | 0      | 0      | 0      | 0      | 0      | 0      | 0      | 0      | 0      | 0      | 0      | 0      |
| Rhodopseudomonas        | 3              | 246            | 0      | 0      | 0      | 0      | 0      | 0      | 0      | 0      | 0      | 0      | 0      | 0      | 0      | 0      | 0      | 0      | 0      | 0      |
| Rhodospirillum          | 2              | 121            | 0      | 0      | 0      | 0      | 0      | 0      | 0      | 0      | 0      | 0      | 0      | 0      | 0      | 0      | 0      | 0      | 0      | 0      |
| Rhodothermus            | 2              | 76             | 0      | 0      | 0      | 0      | 0      | 0      | 0      | 0      | 0      | 0      | 0      | 0      | 0      | 0      | 0      | 0      | 0      | 0      |
| Rhodovulum              | 1              | 4              | 0      | 0      | 0      | 0      | 0      | 0      | 0      | 0      | 0      | 0      | 0      | 0      | 0      | 0      | 0      | 0      | 0      | 0      |
| Richelia                | 1              | 2              | 0      | 0      | 0      | 0      | 0      | 0      | 0      | 0      | 0      | 0      | 0      | 0      | 0      | 0      | 0      | 0      | 0      | 0      |
| Rickettsia              | 2              | 43             | 0      | 0      | 0      | 0      | 0      | 0      | 0      | 0      | 0      | 0      | 0      | 0      | 0      | 0      | 0      | 0      | 0      | 0      |
| Rickettsiaceae          | 1              | 5              | 0      | 0      | 0      | 0      | 0      | 0      | 0      | 0      | 0      | 0      | 0      | 0      | 0      | 0      | 0      | 0      | 0      | 0      |
| Riemerella              | 2              | 61             | 0      | 0      | 0      | 0      | 0      | 0      | 0      | 0      | 0      | 0      | 0      | 0      | 0      | 0      | 0      | 0      | 0      | 0      |
| Rivularia               | 1              | 18             | 0      | 0      | 0      | 0      | 0      | 0      | 0      | 0      | 0      | 0      | 0      | 0      | 0      | 0      | 0      | 0      | 0      | 0      |
| Robiginitalea           | 2              | 83             | 0      | 0      | 0      | 0      | 0      | 0      | 0      | 0      | 0      | 0      | 0      | 0      | 0      | 0      | 0      | 0      | 0      | 0      |
| Roseburia               | 2              | 58             | 0      | 0      | 0      | 0      | 0      | 0      | 0      | 0      | 0      | 0      | 0      | 0      | 0      | 0      | 0      | 0      | 0      | 0      |
| Roseibium               | 1              | 3              | 0      | 0      | 0      | 0      | 0      | 0      | 0      | 0      | 0      | 0      | 0      | 0      | 0      | 0      | 0      | 0      | 0      | 0      |
| Roseiflexus             | 3              | 100            | 0      | 0      | 0      | 0      | 0      | 0      | 0      | 0      | 0      | 0      | 0      | 0      | 0      | 0      | 0      | 0      | 0      | 0      |
| Roseobacter             | 2              | 149            | 0      | 0      | 0      | 0      | 0      | 0      | 0      | 0      | 0      | 0      | 0      | 0      | 0      | 0      | 0      | 0      | 0      | 0      |
| Roseomonas              | 1              | 2              | 0      | 0      | 0      | 0      | 0      | 0      | 0      | 0      | 0      | 0      | 0      | 0      | 0      | 0      | 0      | 0      | 0      | 0      |
| Roseovarius             | 1              | 15             | 0      | 0      | 0      | 0      | 0      | 0      | 0      | 0      | 0      | 0      | 0      | 0      | 0      | 0      | 0      | 0      | 0      | 0      |
| Rothia                  | 1              | 44             | 0      | 0      | 0      | 0      | 0      | 0      | 0      | 0      | 0      | 0      | 0      | 0      | 0      | 0      | 0      | 0      | 0      | 0      |
| Rubrivivax              | 1              | 24             | 0      | 0      | 0      | 0      | 0      | 0      | 0      | 0      | 0      | 0      | 0      | 0      | 0      | 0      | 0      | 0      | 0      | 0      |
| Rubrobacter             | 3              | 117            | 0      | 0      | 0      | 0      | 0      | 0      | 0      | 0      | 0      | 0      | 0      | 0      | 0      | 0      | 0      | 0      | 0      | 0      |
| Ruegeria                | 2              | 189            | 0      | 0      | 0      | 0      | 0      | 0      | 0      | 0      | 0      | 0      | 0      | 0      | 0      | 0      | 0      | 0      | 0      | 0      |

| Genus             | Cluster Number | Protein Counts | K15061 | K15062 | K15063 | K15064 | K15065 | K15066 | K15236 | K15237 | K15238 | K15242 | K15247 | K15253 | K15749 | K15751 | K15754 | K15756 | K15757 | K15981 |
|-------------------|----------------|----------------|--------|--------|--------|--------|--------|--------|--------|--------|--------|--------|--------|--------|--------|--------|--------|--------|--------|--------|
| Ruminococcaceae   | 1              | 2              | 0      | 0      | 0      | 0      | 0      | 0      | 0      | 0      | 0      | 0      | 0      | 0      | 0      | 0      | 0      | 0      | 0      | 0      |
| Ruminococcus      | 2              | 101            | 0      | 0      | 0      | 0      | 0      | 0      | 0      | 0      | 0      | 0      | 0      | 0      | 0      | 0      | 0      | 0      | 0      | 0      |
| Runella           | 1              | 26             | 0      | 0      | 0      | 0      | 0      | 0      | 0      | 0      | 0      | 0      | 0      | 0      | 0      | 0      | 0      | 0      | 0      | 0      |
| Saccharomonospora | 2              | 132            | 0      | 0      | 0      | 0      | 0      | 1      | 0      | 0      | 0      | 0      | 0      | 0      | 0      | 0      | 0      | 0      | 0      | 0      |
| Saccharophagus    | 2              | 81             | 0      | 0      | 0      | 0      | 0      | 0      | 0      | 0      | 0      | 0      | 0      | 0      | 0      | 0      | 0      | 0      | 0      | 0      |
| Saccharopolyspora | 3              | 194            | 0      | 0      | 0      | 0      | 0      | 0      | 0      | 0      | 0      | 0      | 0      | 0      | 0      | 0      | 0      | 0      | 0      | 0      |
| Saccharothrix     | 1              | 32             | 0      | 0      | 0      | 0      | 0      | 0      | 0      | 0      | 0      | 0      | 0      | 0      | 0      | 0      | 0      | 0      | 0      | 0      |
| Sagittula         | 1              | 10             | 0      | 0      | 0      | 0      | 0      | 0      | 0      | 0      | 0      | 0      | 0      | 0      | 0      | 0      | 0      | 0      | 0      | 0      |
| Salinibacter      | 2              | 77             | 0      | 0      | 0      | 0      | 0      | 0      | 0      | 0      | 0      | 0      | 0      | 0      | 0      | 0      | 0      | 0      | 0      | 0      |
| Salinimonas       | 1              | 1              | 0      | 0      | 0      | 0      | 0      | 0      | 0      | 0      | 0      | 0      | 0      | 0      | 0      | 0      | 0      | 0      | 0      | 0      |
| Salinispora       | 3              | 127            | 0      | 0      | 0      | 0      | 0      | 0      | 0      | 0      | 0      | 0      | 0      | 0      | 0      | 0      | 0      | 0      | 0      | 1      |
| Salinivibrio      | 1              | 2              | 0      | 0      | 0      | 0      | 0      | 0      | 0      | 0      | 0      | 0      | 0      | 0      | 0      | 0      | 0      | 0      | 0      | 0      |
| Salmonella        | 2              | 151            | 0      | 0      | 0      | 0      | 0      | 0      | 0      | 0      | 0      | 0      | 0      | 0      | 0      | 0      | 0      | 0      | 0      | 0      |
| Sanguibacter      | 2              | 73             | 0      | 0      | 0      | 0      | 0      | 0      | 0      | 0      | 0      | 0      | 0      | 0      | 0      | 0      | 0      | 0      | 0      | 0      |
| Saprospira        | 1              | 13             | 0      | 0      | 0      | 0      | 0      | 0      | 0      | 0      | 0      | 0      | 0      | 0      | 0      | 0      | 0      | 0      | 0      | 0      |
| Scardovia         | 1              | 1              | 0      | 0      | 0      | 0      | 0      | 0      | 0      | 0      | 0      | 0      | 0      | 0      | 0      | 0      | 0      | 0      | 0      | 0      |
| Scytonema         | 1              | 10             | 0      | 0      | 0      | 0      | 0      | 0      | 0      | 0      | 0      | 0      | 0      | 0      | 0      | 0      | 0      | 0      | 0      | 0      |
| Sebaldella        | 2              | 69             | 0      | 0      | 0      | 0      | 0      | 0      | 0      | 0      | 0      | 0      | 0      | 0      | 0      | 0      | 0      | 0      | 0      | 0      |
| Segniliparus      | 2              | 85             | 0      | 0      | 0      | 0      | 0      | 0      | 0      | 0      | 0      | 0      | 0      | 0      | 0      | 0      | 0      | 0      | 0      | 0      |
| Selenomonas       | 2              | 57             | 0      | 0      | 0      | 0      | 0      | 0      | 0      | 0      | 0      | 0      | 0      | 0      | 0      | 0      | 0      | 0      | 0      | 0      |
| Serinicoccus      | 1              | 1              | 0      | 0      | 0      | 0      | 0      | 0      | 0      | 0      | 0      | 0      | 0      | 0      | 0      | 0      | 0      | 0      | 0      | 0      |
| Serratia          | 2              | 186            | 0      | 0      | 0      | 0      | 0      | 0      | 0      | 0      | 0      | 0      | 0      | 0      | 0      | 0      | 0      | 0      | 0      | 0      |
| Shewanella        | 3              | 214            | 0      | 0      | 0      | 0      | 0      | 0      | 0      | 0      | 0      | 0      | 0      | 0      | 0      | 0      | 0      | 0      | 0      | 0      |
| Shigella          | 2              | 172            | 0      | 0      | 0      | 0      | 0      | 0      | 0      | 0      | 0      | 0      | 0      | 0      | 0      | 0      | 0      | 0      | 0      | 0      |
| Shinella          | 1              | 2              | 0      | 0      | 0      | 0      | 0      | 0      | 0      | 0      | 0      | 0      | 0      | 0      | 0      | 0      | 0      | 0      | 0      | 0      |
| Sideroxydans      | 2              | 81             | 0      | 0      | 0      | 0      | 0      | 0      | 0      | 0      | 0      | 0      | 0      | 0      | 0      | 0      | 0      | 0      | 0      | 0      |
| Silicibacter      | 2              | 105            | 0      | 0      | 0      | 0      | 0      | 0      | 0      | 0      | 0      | 0      | 0      | 0      | 0      | 0      | 0      | 0      | 0      | 0      |
| Simiduia          | 1              | 18             | 0      | 0      | 0      | 0      | 0      | 0      | 0      | 0      | 0      | 0      | 0      | 0      | 0      | 0      | 0      | 0      | 0      | 0      |
| Simkania          | 1              | 6              | 0      | 0      | 0      | 0      | 0      | 0      | 0      | 0      | 0      | 0      | 0      | 0      | 0      | 0      | 0      | 0      | 0      | 0      |
| Simonsiella       | 1              | 2              | 0      | 0      | 0      | 0      | 0      | 0      | 0      | 0      | 0      | 0      | 0      | 0      | 0      | 0      | 0      | 0      | 0      | 0      |
| Singulisphaera    | 1              | 18             | 0      | 0      | 0      | 0      | 0      | 0      | 0      | 0      | 0      | 0      | 0      | 0      | 0      | 0      | 0      | 0      | 0      | 0      |
| Sinorhizobium     | 3              | 207            | 0      | 0      | 0      | 0      | 0      | 0      | 0      | 0      | 0      | 0      | 0      | 0      | 0      | 0      | 0      | 0      | 0      | 0      |
| Slackia           | 2              | 46             | 0      | 0      | 0      | 0      | 0      | 0      | 0      | 0      | 0      | 0      | 0      | 0      | 0      | 0      | 0      | 0      | 0      | 0      |
| Smaragdicooccus   | 1              | 3              | 0      | 0      | 0      | 0      | 0      | 0      | 0      | 0      | 0      | 0      | 0      | 0      | 0      | 0      | 0      | 0      | 0      | 0      |
| Sodalis           | 2              | 71             | 0      | 0      | 0      | 0      | 0      | 0      | 0      | 0      | 0      | 0      | 0      | 0      | 0      | 0      | 0      | 0      | 0      | 0      |
| Solibacillus      | 1              | 23             | 0      | 0      | 0      | 0      | 0      | 0      | 0      | 0      | 0      | 0      | 0      | 0      | 0      | 0      | 0      | 0      | 0      | 0      |
| Solitaea          | 1              | 13             | 0      | 0      | 0      | 0      | 0      | 0      | 0      | 0      | 0      | 0      | 0      | 0      | 0      | 0      | 0      | 0      | 0      | 0      |
| Sorangium         | 3              | 115            | 0      | 0      | 0      | 0      | 0      | 0      | 0      | 0      | 0      | 0      | 0      | 0      | 0      | 0      | 0      | 0      | 0      | 0      |
| Sphaerobacter     | 2              | 100            | 0      | 0      | 0      | 0      | 0      | 1      | 0      | 0      | 0      | 0      | 0      | 0      | 0      | 0      | 0      | 0      | 0      | 0      |
| Sphaerochaeta     | 1              | 42             | 0      | 0      | 0      | 0      | 0      | 0      | 0      | 0      | 0      | 0      | 0      | 0      | 0      | 0      | 0      | 0      | 0      | 0      |
| Sphingobacterium  | 3              | 85             | 0      | 0      | 0      | 0      | 0      | 0      | 0      | 0      | 0      | 0      | 0      | 0      | 0      | 0      | 0      | 0      | 0      | 0      |
| Sphingobium       | 1              | 179            | 1      | 1      | 1      | 1      | 1      | 1      | 1      | 1      | 1      | 1      | 0      | 1      | 0      | 0      | 0      | 0      | 0      | 0      |
| Sphingomonadaceae | 1              | 15             | 0      | 0      | 0      | 0      | 0      | 0      | 0      | 1      | 1      | 0      | 0      | 0      | 0      | 0      | 0      | 0      | 0      | 0      |
| Sphingomonas      | 2              | 220            | 1      | 1      | 1      | 1      | 1      | 0      | 1      | 1      | 1      | 1      | 0      | 0      | 1      | 0      | 0      | 0      | 0      | 0      |
| Sphingopyxis      | 3              | 99             | 0      | 0      | 0      | 0      | 0      | 0      | 0      | 0      | 0      | 0      | 0      | 0      | 0      | 0      | 0      | 0      | 0      | 0      |
| Spirochaeta       | 2              | 103            | 0      | 0      | 0      | 0      | 0      | 0      | 0      | 0      | 0      | 0      | 0      | 0      | 0      | 0      | 0      | 0      | 0      | 0      |
| Spiroplasma       | 1              | 6              | 0      | 0      | 0      | 0      | 0      | 0      | 0      | 0      | 0      | 0      | 0      | 0      | 0      | 0      | 0      | 0      | 0      | 0      |
| Spirosoma         | 2              | 107            | 0      | 0      | 0      | 0      | 0      | 0      | 0      | 0      | 0      | 0      | 0      | 0      | 0      | 0      | 0      | 0      | 0      | 0      |
| Stackebrandtia    | 2              | 110            | 0      | 0      | 0      | 0      | 0      | 0      | 0      | 0      | 0      | 0      | 0      | 0      | 0      | 0      | 0      | 0      | 0      | 0      |
| Stanieria         | 1              | 17             | 0      | 0      | 0      | 0      | 0      | 0      | 0      | 0      | 0      | 0      | 0      | 0      | 0      | 0      | 0      | 0      | 0      | 0      |
| Staphylococcus    | 2              | 108            | 0      | 0      | 0      | 0      | 0      | 0      | 0      | 0      | 0      | 0      | 0      | 0      | 0      | 0      | 0      | 0      | 0      | 0      |
| Staphylothermus   | 1              | 12             | 0      | 0      | 0      | 0      | 0      | 0      | 0      | 0      | 0      | 0      | 0      | 0      | 0      | 0      | 0      | 0      | 0      | 0      |



| Genus                  | Cluster Number | Protein Counts | K15061 | K15062 | K15063 | K15064 | K15065 | K15066 | K15236 | K15237 | K15238 | K15242 | K15247 | K15253 | K15749 | K15751 | K15754 | K15756 | K15757 | K15981 |
|------------------------|----------------|----------------|--------|--------|--------|--------|--------|--------|--------|--------|--------|--------|--------|--------|--------|--------|--------|--------|--------|--------|
| Stappia                | 1              | 2              | 0      | 0      | 0      | 0      | 0      | 0      | 0      | 0      | 0      | 0      | 0      | 0      | 0      | 0      | 0      | 0      | 0      | 0      |
| Starkeya               | 3              | 134            | 0      | 0      | 0      | 0      | 0      | 0      | 0      | 0      | 0      | 0      | 0      | 0      | 0      | 0      | 0      | 0      | 0      | 0      |
| Stenotrophomonas       | 3              | 104            | 0      | 0      | 0      | 0      | 0      | 0      | 0      | 0      | 0      | 0      | 0      | 0      | 0      | 0      | 0      | 0      | 0      | 0      |
| Stigmatella            | 3              | 129            | 0      | 0      | 0      | 0      | 0      | 0      | 0      | 0      | 0      | 0      | 0      | 0      | 0      | 0      | 0      | 0      | 0      | 0      |
| Streptobacillus        | 1              | 38             | 0      | 0      | 0      | 0      | 0      | 0      | 0      | 0      | 0      | 0      | 0      | 0      | 0      | 0      | 0      | 0      | 0      | 0      |
| Streptococcus          | 2              | 121            | 0      | 0      | 0      | 0      | 0      | 0      | 0      | 0      | 0      | 0      | 0      | 0      | 0      | 0      | 0      | 0      | 0      | 0      |
| Streptomyces           | 2              | 253            | 0      | 0      | 0      | 0      | 0      | 0      | 0      | 0      | 0      | 0      | 0      | 0      | 0      | 0      | 0      | 0      | 0      | 1      |
| Streptosporangium      | 3              | 148            | 0      | 0      | 0      | 0      | 0      | 0      | 0      | 0      | 0      | 0      | 0      | 0      | 0      | 0      | 0      | 0      | 0      | 1      |
| Strigomonas            | 1              | 2              | 0      | 0      | 0      | 0      | 0      | 0      | 0      | 0      | 0      | 0      | 0      | 0      | 0      | 0      | 0      | 0      | 0      | 0      |
| Sulfitobacter          | 1              | 10             | 0      | 0      | 0      | 0      | 0      | 0      | 0      | 0      | 0      | 0      | 0      | 0      | 0      | 0      | 0      | 0      | 0      | 0      |
| Sulfobacillus          | 1              | 30             | 0      | 0      | 0      | 0      | 0      | 0      | 0      | 0      | 0      | 0      | 0      | 0      | 0      | 0      | 0      | 0      | 0      | 0      |
| Sulfolobus             | 1              | 23             | 0      | 0      | 0      | 0      | 0      | 0      | 0      | 0      | 0      | 0      | 0      | 0      | 0      | 0      | 0      | 0      | 0      | 0      |
| Sulfuricurvum          | 2              | 67             | 0      | 0      | 0      | 0      | 0      | 0      | 0      | 0      | 0      | 0      | 0      | 0      | 0      | 0      | 0      | 0      | 0      | 0      |
| Sulfurihydrogenibium   | 2              | 55             | 0      | 0      | 0      | 0      | 0      | 0      | 0      | 0      | 0      | 0      | 0      | 0      | 0      | 0      | 0      | 0      | 0      | 0      |
| Sulfurimonas           | 2              | 60             | 0      | 0      | 0      | 0      | 0      | 0      | 0      | 0      | 0      | 0      | 0      | 0      | 0      | 0      | 0      | 0      | 0      | 0      |
| Sulfurospirillum       | 1              | 48             | 0      | 0      | 0      | 0      | 0      | 0      | 0      | 0      | 0      | 0      | 0      | 0      | 0      | 0      | 0      | 0      | 0      | 0      |
| Sulfurovum             | 2              | 48             | 0      | 0      | 0      | 0      | 0      | 0      | 0      | 0      | 0      | 0      | 0      | 0      | 0      | 0      | 0      | 0      | 0      | 0      |
| Symbiobacterium        | 2              | 68             | 0      | 0      | 0      | 0      | 0      | 0      | 0      | 0      | 0      | 0      | 0      | 0      | 0      | 0      | 0      | 0      | 0      | 0      |
| Synechococcus          | 1              | 34             | 0      | 0      | 0      | 0      | 0      | 0      | 0      | 0      | 0      | 0      | 0      | 0      | 0      | 0      | 0      | 0      | 0      | 0      |
| Synechocystis          | 1              | 40             | 0      | 0      | 0      | 0      | 0      | 0      | 0      | 0      | 0      | 0      | 0      | 0      | 0      | 0      | 0      | 0      | 0      | 0      |
| Synergistetes          | 1              | 27             | 0      | 0      | 0      | 0      | 0      | 0      | 0      | 0      | 0      | 0      | 0      | 0      | 0      | 0      | 0      | 0      | 0      | 0      |
| Syntrophobacter        | 2              | 101            | 0      | 0      | 0      | 0      | 0      | 0      | 0      | 0      | 0      | 0      | 0      | 0      | 0      | 0      | 0      | 0      | 0      | 0      |
| Syntrophobotulus       | 2              | 71             | 0      | 0      | 0      | 0      | 0      | 0      | 0      | 0      | 0      | 0      | 0      | 0      | 0      | 0      | 0      | 0      | 0      | 0      |
| Syntrophomonas         | 2              | 58             | 0      | 0      | 0      | 0      | 0      | 0      | 0      | 0      | 0      | 0      | 0      | 0      | 0      | 0      | 0      | 0      | 0      | 0      |
| Syntrophothermus       | 2              | 60             | 0      | 0      | 0      | 0      | 0      | 0      | 0      | 0      | 0      | 0      | 0      | 0      | 0      | 0      | 0      | 0      | 0      | 0      |
| Syntrophus             | 2              | 66             | 0      | 0      | 0      | 0      | 0      | 0      | 0      | 0      | 0      | 0      | 0      | 0      | 0      | 0      | 0      | 0      | 0      | 0      |
| Tannerella             | 1              | 8              | 0      | 0      | 0      | 0      | 0      | 0      | 0      | 0      | 0      | 0      | 0      | 0      | 0      | 0      | 0      | 0      | 0      | 0      |
| Taylorella             | 1              | 43             | 0      | 0      | 0      | 0      | 0      | 0      | 0      | 0      | 0      | 0      | 0      | 0      | 0      | 0      | 0      | 0      | 0      | 0      |
| Tepidanaerobacter      | 2              | 55             | 0      | 0      | 0      | 0      | 0      | 0      | 0      | 0      | 0      | 0      | 0      | 0      | 0      | 0      | 0      | 0      | 0      | 0      |
| Teredinibacter         | 2              | 109            | 0      | 0      | 0      | 0      | 0      | 0      | 0      | 0      | 0      | 0      | 0      | 0      | 0      | 0      | 0      | 0      | 0      | 0      |
| Terrabacter            | 1              | 1              | 0      | 0      | 0      | 0      | 0      | 0      | 0      | 0      | 0      | 0      | 0      | 0      | 0      | 0      | 0      | 0      | 0      | 0      |
| Terriglobus            | 2              | 83             | 0      | 0      | 0      | 0      | 0      | 0      | 0      | 0      | 0      | 0      | 0      | 0      | 0      | 0      | 0      | 0      | 0      | 0      |
| Tetragenococcus        | 1              | 12             | 0      | 0      | 0      | 0      | 0      | 0      | 0      | 0      | 0      | 0      | 0      | 0      | 0      | 0      | 0      | 0      | 0      | 0      |
| Thalassiobium          | 1              | 11             | 0      | 0      | 0      | 0      | 0      | 0      | 0      | 0      | 0      | 0      | 0      | 0      | 0      | 0      | 0      | 0      | 0      | 0      |
| Thalassobacter         | 1              | 9              | 0      | 0      | 0      | 0      | 0      | 0      | 0      | 0      | 0      | 0      | 0      | 0      | 0      | 0      | 0      | 0      | 0      | 0      |
| Thalassolituus         | 1              | 12             | 0      | 0      | 0      | 0      | 0      | 0      | 0      | 0      | 0      | 0      | 0      | 0      | 0      | 0      | 0      | 0      | 0      | 0      |
| Thalassospira          | 1              | 2              | 0      | 0      | 0      | 0      | 0      | 0      | 0      | 0      | 0      | 0      | 0      | 0      | 0      | 0      | 0      | 0      | 0      | 0      |
| Thauera                | 1              | 111            | 0      | 0      | 0      | 0      | 0      | 0      | 0      | 0      | 0      | 0      | 0      | 0      | 0      | 0      | 0      | 0      | 0      | 0      |
| Thermacetogenium       | 1              | 7              | 0      | 0      | 0      | 0      | 0      | 0      | 0      | 0      | 0      | 0      | 0      | 0      | 0      | 0      | 0      | 0      | 0      | 0      |
| Thermaerobacter        | 2              | 79             | 0      | 0      | 0      | 0      | 0      | 0      | 0      | 0      | 0      | 0      | 0      | 0      | 0      | 0      | 0      | 0      | 0      | 0      |
| Thermanaerovibrio      | 2              | 58             | 0      | 0      | 0      | 0      | 0      | 0      | 0      | 0      | 0      | 0      | 0      | 0      | 0      | 0      | 0      | 0      | 0      | 0      |
| Thermincola            | 2              | 62             | 0      | 0      | 0      | 0      | 0      | 0      | 0      | 0      | 0      | 0      | 0      | 0      | 0      | 0      | 0      | 0      | 0      | 0      |
| Thermoanaerobacter     | 2              | 76             | 0      | 0      | 0      | 0      | 0      | 0      | 0      | 0      | 0      | 0      | 0      | 0      | 0      | 0      | 0      | 0      | 0      | 0      |
| Thermoanaerobacterium  | 2              | 64             | 0      | 0      | 0      | 0      | 0      | 0      | 0      | 0      | 0      | 0      | 0      | 0      | 0      | 0      | 0      | 0      | 0      | 0      |
| Thermobacillus         | 1              | 11             | 0      | 0      | 0      | 0      | 0      | 0      | 0      | 0      | 0      | 0      | 0      | 0      | 0      | 0      | 0      | 0      | 0      | 0      |
| Thermobaculum          | 2              | 62             | 0      | 0      | 0      | 0      | 0      | 0      | 0      | 0      | 0      | 0      | 0      | 0      | 0      | 0      | 0      | 0      | 0      | 0      |
| Thermobifida           | 2              | 72             | 0      | 0      | 0      | 0      | 0      | 0      | 0      | 0      | 0      | 0      | 0      | 0      | 0      | 0      | 0      | 0      | 0      | 0      |
| Thermobispora          | 2              | 109            | 0      | 0      | 0      | 0      | 0      | 0      | 0      | 0      | 0      | 0      | 0      | 0      | 0      | 0      | 0      | 0      | 0      | 0      |
| Thermococcus           | 1              | 13             | 0      | 0      | 0      | 0      | 0      | 0      | 0      | 0      | 0      | 0      | 0      | 0      | 0      | 0      | 0      | 0      | 0      | 0      |
| Thermocrinis           | 2              | 60             | 0      | 0      | 0      | 0      | 0      | 0      | 0      | 0      | 0      | 0      | 0      | 0      | 0      | 0      | 0      | 0      | 0      | 0      |
| Thermodesulfator       | 1              | 10             | 0      | 0      | 0      | 0      | 0      | 0      | 0      | 0      | 0      | 0      | 0      | 0      | 0      | 0      | 0      | 0      | 0      | 0      |
| Thermodesulfobacterium | 1              | 9              | 0      | 0      | 0      | 0      | 0      | 0      | 0      | 0      | 0      | 0      | 0      | 0      | 0      | 0      | 0      | 0      | 0      | 0      |

| Genus                | Cluster Number | Protein Counts | K15061 | K15062 | K15063 | K15064 | K15065 | K15066 | K15236 | K15237 | K15238 | K15242 | K15247 | K15253 | K15749 | K15751 | K15754 | K15756 | K15757 | K15981 |
|----------------------|----------------|----------------|--------|--------|--------|--------|--------|--------|--------|--------|--------|--------|--------|--------|--------|--------|--------|--------|--------|--------|
| Thermodesulfobium    | 1              | 13             | 0      | 0      | 0      | 0      | 0      | 0      | 0      | 0      | 0      | 0      | 0      | 0      | 0      | 0      | 0      | 0      | 0      | 0      |
| Thermodesulfovibrio  | 2              | 60             | 0      | 0      | 0      | 0      | 0      | 0      | 0      | 0      | 0      | 0      | 0      | 0      | 0      | 0      | 0      | 0      | 0      | 0      |
| Thermofilum          | 1              | 9              | 0      | 0      | 0      | 0      | 0      | 0      | 0      | 0      | 0      | 0      | 0      | 0      | 0      | 0      | 0      | 0      | 0      | 0      |
| Thermogladus         | 1              | 7              | 0      | 0      | 0      | 0      | 0      | 0      | 0      | 0      | 0      | 0      | 0      | 0      | 0      | 0      | 0      | 0      | 0      | 0      |
| Thermomicrobium      | 2              | 92             | 0      | 0      | 0      | 0      | 0      | 0      | 0      | 0      | 0      | 0      | 0      | 0      | 0      | 0      | 0      | 0      | 0      | 0      |
| Thermomonospora      | 2              | 125            | 0      | 0      | 0      | 0      | 0      | 0      | 0      | 0      | 0      | 0      | 0      | 0      | 0      | 0      | 0      | 0      | 0      | 1      |
| Thermoplasma         | 1              | 11             | 0      | 0      | 0      | 0      | 0      | 0      | 0      | 0      | 0      | 0      | 0      | 0      | 0      | 0      | 0      | 0      | 0      | 0      |
| Thermoplasmatales    | 1              | 6              | 0      | 0      | 0      | 0      | 0      | 0      | 0      | 0      | 0      | 0      | 0      | 0      | 0      | 0      | 0      | 0      | 0      | 0      |
| Thermoproteus        | 1              | 12             | 0      | 0      | 0      | 0      | 0      | 0      | 0      | 0      | 0      | 0      | 0      | 0      | 0      | 0      | 0      | 0      | 0      | 0      |
| Thermosediminibacter | 2              | 64             | 0      | 0      | 0      | 0      | 0      | 0      | 0      | 0      | 0      | 0      | 0      | 0      | 0      | 0      | 0      | 0      | 0      | 0      |
| Thermosipho          | 2              | 70             | 0      | 0      | 0      | 0      | 0      | 0      | 0      | 0      | 0      | 0      | 0      | 0      | 0      | 0      | 0      | 0      | 0      | 0      |
| Thermosphaera        | 1              | 10             | 0      | 0      | 0      | 0      | 0      | 0      | 0      | 0      | 0      | 0      | 0      | 0      | 0      | 0      | 0      | 0      | 0      | 0      |
| Thermosynechococcus  | 1              | 6              | 0      | 0      | 0      | 0      | 0      | 0      | 0      | 0      | 0      | 0      | 0      | 0      | 0      | 0      | 0      | 0      | 0      | 0      |
| Thermotoga           | 2              | 80             | 0      | 0      | 0      | 0      | 0      | 0      | 0      | 0      | 0      | 0      | 0      | 0      | 0      | 0      | 0      | 0      | 0      | 0      |
| Thermovibrio         | 2              | 58             | 0      | 0      | 0      | 0      | 0      | 0      | 0      | 0      | 0      | 0      | 0      | 0      | 0      | 0      | 0      | 0      | 0      | 0      |
| Thermovirga          | 1              | 9              | 0      | 0      | 0      | 0      | 0      | 0      | 0      | 0      | 0      | 0      | 0      | 0      | 0      | 0      | 0      | 0      | 0      | 0      |
| Thermus              | 2              | 107            | 0      | 0      | 0      | 0      | 0      | 0      | 0      | 0      | 0      | 0      | 0      | 0      | 0      | 0      | 0      | 0      | 0      | 0      |
| Thioalkalimicrobium  | 1              | 4              | 0      | 0      | 0      | 0      | 0      | 0      | 0      | 0      | 0      | 0      | 0      | 0      | 0      | 0      | 0      | 0      | 0      | 0      |
| Thioalkalivibrio     | 2              | 91             | 0      | 0      | 0      | 0      | 0      | 0      | 0      | 0      | 0      | 0      | 0      | 0      | 0      | 0      | 0      | 0      | 0      | 0      |
| Thiobaca             | 1              | 2              | 0      | 0      | 0      | 0      | 0      | 0      | 0      | 0      | 0      | 0      | 0      | 0      | 0      | 0      | 0      | 0      | 0      | 0      |
| Thiobacillus         | 2              | 67             | 0      | 0      | 0      | 0      | 0      | 0      | 0      | 0      | 0      | 0      | 0      | 0      | 0      | 0      | 0      | 0      | 0      | 0      |
| Thiocapsa            | 1              | 2              | 0      | 0      | 0      | 0      | 0      | 0      | 0      | 0      | 0      | 0      | 0      | 0      | 0      | 0      | 0      | 0      | 0      | 0      |
| Thiocystis           | 1              | 11             | 0      | 0      | 0      | 0      | 0      | 0      | 0      | 0      | 0      | 0      | 0      | 0      | 0      | 0      | 0      | 0      | 0      | 0      |
| Thioflavococcus      | 1              | 13             | 0      | 0      | 0      | 0      | 0      | 0      | 0      | 0      | 0      | 0      | 0      | 0      | 0      | 0      | 0      | 0      | 0      | 0      |
| Thiomicrospira       | 2              | 50             | 0      | 0      | 0      | 0      | 0      | 0      | 0      | 0      | 0      | 0      | 0      | 0      | 0      | 0      | 0      | 0      | 0      | 0      |
| Thiomonas            | 2              | 85             | 0      | 0      | 0      | 0      | 0      | 0      | 0      | 0      | 0      | 0      | 0      | 0      | 0      | 0      | 0      | 0      | 0      | 0      |
| Thiorhodococcus      | 1              | 2              | 0      | 0      | 0      | 0      | 0      | 0      | 0      | 0      | 0      | 0      | 0      | 0      | 0      | 0      | 0      | 0      | 0      | 0      |
| Thiothrix            | 1              | 2              | 0      | 0      | 0      | 0      | 0      | 0      | 0      | 0      | 0      | 0      | 0      | 0      | 0      | 0      | 0      | 0      | 0      | 0      |
| Tistrella            | 1              | 42             | 0      | 0      | 0      | 0      | 0      | 0      | 0      | 0      | 0      | 0      | 0      | 0      | 0      | 0      | 0      | 0      | 0      | 0      |
| Tolumonas            | 2              | 100            | 0      | 0      | 0      | 0      | 0      | 0      | 0      | 0      | 0      | 0      | 0      | 0      | 0      | 0      | 0      | 0      | 0      | 0      |
| Transposon           | 1              | 2              | 0      | 0      | 0      | 0      | 0      | 0      | 0      | 0      | 0      | 0      | 0      | 0      | 0      | 0      | 0      | 0      | 0      | 0      |
| Treponema            | 1              | 63             | 0      | 0      | 0      | 0      | 0      | 0      | 0      | 0      | 0      | 0      | 0      | 0      | 0      | 0      | 0      | 0      | 0      | 0      |
| Trichodesmium        | 2              | 71             | 0      | 0      | 0      | 0      | 0      | 0      | 0      | 0      | 0      | 0      | 0      | 0      | 0      | 0      | 0      | 0      | 0      | 0      |
| Trichormus           | 1              | 12             | 0      | 0      | 0      | 0      | 0      | 0      | 0      | 0      | 0      | 0      | 0      | 0      | 0      | 0      | 0      | 0      | 0      | 0      |
| Tropheryma           | 2              | 22             | 0      | 0      | 0      | 0      | 0      | 0      | 0      | 0      | 0      | 0      | 0      | 0      | 0      | 0      | 0      | 0      | 0      | 0      |
| Truepera             | 2              | 104            | 0      | 0      | 0      | 0      | 0      | 0      | 0      | 0      | 0      | 0      | 0      | 0      | 0      | 0      | 0      | 0      | 0      | 0      |
| Tsukamurella         | 2              | 123            | 0      | 0      | 0      | 0      | 0      | 0      | 0      | 0      | 0      | 0      | 0      | 0      | 0      | 0      | 0      | 0      | 0      | 1      |
| Turneriella          | 1              | 16             | 0      | 0      | 0      | 0      | 0      | 0      | 0      | 0      | 0      | 0      | 0      | 0      | 0      | 0      | 0      | 0      | 0      | 0      |
| Uliginosibacterium   | 1              | 2              | 0      | 0      | 0      | 0      | 0      | 0      | 0      | 0      | 0      | 0      | 0      | 0      | 0      | 0      | 0      | 0      | 0      | 0      |
| Ureaplasma           | 1              | 24             | 0      | 0      | 0      | 0      | 0      | 0      | 0      | 0      | 0      | 0      | 0      | 0      | 0      | 0      | 0      | 0      | 0      | 0      |
| Ureibacillus         | 1              | 2              | 0      | 0      | 0      | 0      | 0      | 0      | 0      | 0      | 0      | 0      | 0      | 0      | 0      | 0      | 0      | 0      | 0      | 0      |
| Variovorax           | 3              | 187            | 0      | 0      | 0      | 0      | 0      | 0      | 0      | 0      | 0      | 0      | 0      | 0      | 0      | 0      | 0      | 0      | 0      | 0      |
| Veillonella          | 1              | 54             | 0      | 0      | 0      | 0      | 0      | 0      | 0      | 0      | 0      | 0      | 0      | 0      | 0      | 0      | 0      | 0      | 0      | 0      |
| Verminephrobacter    | 3              | 188            | 0      | 0      | 0      | 0      | 0      | 0      | 0      | 0      | 0      | 0      | 0      | 0      | 0      | 0      | 0      | 0      | 0      | 0      |
| Verrucosispora       | 3              | 126            | 0      | 0      | 0      | 0      | 0      | 0      | 0      | 0      | 0      | 0      | 0      | 0      | 0      | 0      | 0      | 0      | 0      | 0      |
| Vibrio               | 2              | 195            | 0      | 0      | 0      | 0      | 0      | 0      | 0      | 0      | 0      | 0      | 0      | 0      | 0      | 0      | 0      | 0      | 0      | 0      |
| Vibrionales          | 1              | 46             | 0      | 0      | 0      | 0      | 0      | 0      | 0      | 0      | 0      | 0      | 0      | 0      | 0      | 0      | 0      | 0      | 0      | 0      |
| Vitreoscilla         | 1              | 1              | 0      | 0      | 0      | 0      | 0      | 0      | 0      | 0      | 0      | 0      | 0      | 0      | 0      | 0      | 0      | 0      | 0      | 0      |
| Vulcanisaeta         | 1              | 14             | 0      | 0      | 0      | 0      | 0      | 0      | 0      | 0      | 0      | 0      | 0      | 0      | 0      | 0      | 0      | 0      | 0      | 0      |
| Waddlia              | 2              | 68             | 0      | 0      | 0      | 0      | 0      | 0      | 0      | 0      | 0      | 0      | 0      | 0      | 0      | 0      | 0      | 0      | 0      | 0      |
| Wautersia            | 1              | 2              | 0      | 0      | 0      | 0      | 0      | 0      | 0      | 0      | 0      | 0      | 0      | 0      | 0      | 0      | 0      | 0      | 0      | 0      |
| Weeksella            | 2              | 65             | 0      | 0      | 0      | 0      | 0      | 0      | 0      | 0      | 0      | 0      | 0      | 0      | 0      | 0      | 0      | 0      | 0      | 0      |

| Genus             | Cluster Number | Protein Counts | K15061 | K15062 | K15063 | K15064 | K15065 | K15066 | K15236 | K15237 | K15238 | K15242 | K15247 | K15253 | K15749 | K15751 | K15754 | K15756 | K15757 | K15981 |
|-------------------|----------------|----------------|--------|--------|--------|--------|--------|--------|--------|--------|--------|--------|--------|--------|--------|--------|--------|--------|--------|--------|
| Weissella         | 1              | 14             | 0      | 0      | 0      | 0      | 0      | 0      | 0      | 0      | 0      | 0      | 0      | 0      | 0      | 0      | 0      | 0      | 0      | 0      |
| Wenxinia          | 1              | 2              | 0      | 0      | 0      | 0      | 0      | 0      | 0      | 0      | 0      | 0      | 0      | 0      | 0      | 0      | 0      | 0      | 0      | 0      |
| Wigglesworthia    | 1              | 29             | 0      | 0      | 0      | 0      | 0      | 0      | 0      | 0      | 0      | 0      | 0      | 0      | 0      | 0      | 0      | 0      | 0      | 0      |
| Wolbachia         | 1              | 32             | 0      | 0      | 0      | 0      | 0      | 0      | 0      | 0      | 0      | 0      | 0      | 0      | 0      | 0      | 0      | 0      | 0      | 0      |
| Wolinella         | 2              | 51             | 0      | 0      | 0      | 0      | 0      | 0      | 0      | 0      | 0      | 0      | 0      | 0      | 0      | 0      | 0      | 0      | 0      | 0      |
| Xanthobacter      | 3              | 176            | 0      | 0      | 0      | 0      | 0      | 0      | 0      | 0      | 0      | 0      | 0      | 0      | 0      | 0      | 0      | 0      | 0      | 0      |
| Xanthobacteraceae | 1              | 4              | 0      | 0      | 0      | 0      | 0      | 0      | 0      | 0      | 0      | 0      | 0      | 0      | 0      | 0      | 0      | 0      | 0      | 0      |
| Xanthomonadaceae  | 1              | 39             | 0      | 0      | 0      | 0      | 0      | 0      | 0      | 0      | 0      | 0      | 0      | 0      | 0      | 0      | 0      | 0      | 0      | 0      |
| Xanthomonas       | 2              | 162            | 0      | 0      | 0      | 0      | 0      | 0      | 0      | 0      | 0      | 0      | 0      | 0      | 0      | 0      | 0      | 0      | 0      | 0      |
| Xenorhabdus       | 2              | 127            | 0      | 0      | 0      | 0      | 0      | 0      | 0      | 0      | 0      | 0      | 0      | 0      | 0      | 0      | 0      | 0      | 0      | 0      |
| Xylanimonas       | 2              | 66             | 0      | 0      | 0      | 0      | 0      | 0      | 0      | 0      | 0      | 0      | 0      | 0      | 0      | 0      | 0      | 0      | 0      | 0      |
| Xylella           | 2              | 52             | 0      | 0      | 0      | 0      | 0      | 0      | 0      | 0      | 0      | 0      | 0      | 0      | 0      | 0      | 0      | 0      | 0      | 0      |
| Yersinia          | 2              | 145            | 0      | 0      | 0      | 0      | 0      | 0      | 0      | 0      | 0      | 0      | 0      | 0      | 0      | 0      | 0      | 0      | 0      | 0      |
| Yokenella         | 2              | 61             | 0      | 0      | 0      | 0      | 0      | 0      | 0      | 0      | 0      | 0      | 0      | 0      | 0      | 0      | 0      | 0      | 0      | 0      |
| Zobellia          | 1              | 28             | 0      | 0      | 0      | 0      | 0      | 0      | 0      | 0      | 0      | 0      | 0      | 0      | 0      | 0      | 0      | 0      | 0      | 0      |
| Zunongwangia      | 2              | 98             | 0      | 0      | 0      | 0      | 0      | 0      | 0      | 0      | 0      | 0      | 0      | 0      | 0      | 0      | 0      | 0      | 0      | 0      |
| Zymomonas         | 2              | 67             | 0      | 0      | 0      | 0      | 0      | 0      | 0      | 0      | 0      | 0      | 0      | 0      | 0      | 0      | 0      | 0      | 0      | 0      |
| Zymophilus        | 1              | 2              | 0      | 0      | 0      | 0      | 0      | 0      | 0      | 0      | 0      | 0      | 0      | 0      | 0      | 0      | 0      | 0      | 0      | 0      |

| Genus               | Cluster Number | Protein Counts | K15982 | K16045 | K16047 | K16049 | K16050 | K16051 | K16173 | K16249 | K16269 | K16270 | K16514 | K16873 | K16874 | K16876 | K16880 | K17067 | K17070 |
|---------------------|----------------|----------------|--------|--------|--------|--------|--------|--------|--------|--------|--------|--------|--------|--------|--------|--------|--------|--------|--------|
| Acaricomes          | 1              | 2              | 0      | 0      | 0      | 0      | 0      | 0      | 0      | 0      | 0      | 0      | 0      | 0      | 0      | 0      | 0      | 0      | 0      |
| Acaryochloris       | 2              | 88             | 0      | 0      | 0      | 0      | 0      | 0      | 0      | 0      | 0      | 0      | 0      | 0      | 0      | 0      | 0      | 0      | 0      |
| Acetivibrio         | 1              | 2              | 0      | 0      | 0      | 0      | 0      | 0      | 0      | 0      | 0      | 0      | 0      | 0      | 0      | 0      | 0      | 0      | 0      |
| Acetobacter         | 2              | 85             | 0      | 0      | 0      | 0      | 0      | 0      | 0      | 0      | 0      | 0      | 0      | 0      | 0      | 0      | 0      | 0      | 0      |
| Acetobacteraceae    | 1              | 2              | 0      | 0      | 0      | 0      | 0      | 0      | 0      | 0      | 0      | 0      | 0      | 0      | 0      | 0      | 0      | 0      | 0      |
| Acetobacterium      | 1              | 8              | 0      | 0      | 0      | 0      | 0      | 0      | 0      | 0      | 0      | 0      | 0      | 0      | 0      | 0      | 0      | 0      | 0      |
| Acetohalobium       | 2              | 79             | 0      | 0      | 0      | 0      | 0      | 0      | 0      | 0      | 0      | 0      | 0      | 0      | 0      | 0      | 0      | 0      | 0      |
| Acholeplasma        | 2              | 38             | 0      | 0      | 0      | 0      | 0      | 0      | 0      | 0      | 0      | 0      | 0      | 0      | 0      | 0      | 0      | 0      | 0      |
| Achromobacter       | 2              | 192            | 0      | 0      | 0      | 0      | 0      | 0      | 0      | 0      | 0      | 0      | 0      | 0      | 0      | 0      | 0      | 0      | 0      |
| Acidaminococcus     | 1              | 65             | 0      | 0      | 0      | 0      | 0      | 0      | 0      | 0      | 0      | 0      | 0      | 0      | 0      | 0      | 0      | 0      | 0      |
| Acidianus           | 1              | 9              | 0      | 0      | 0      | 0      | 0      | 0      | 0      | 0      | 0      | 0      | 0      | 0      | 0      | 0      | 0      | 0      | 0      |
| Acidilobus          | 1              | 8              | 0      | 0      | 0      | 0      | 0      | 0      | 0      | 0      | 0      | 0      | 0      | 0      | 0      | 0      | 0      | 0      | 0      |
| Acidimicrobium      | 2              | 58             | 0      | 0      | 0      | 0      | 0      | 0      | 0      | 0      | 0      | 0      | 0      | 0      | 0      | 0      | 0      | 0      | 0      |
| Acidiphilium        | 3              | 144            | 0      | 0      | 0      | 0      | 0      | 0      | 0      | 0      | 0      | 0      | 0      | 0      | 0      | 1      | 1      | 0      | 0      |
| Acidithiobacillus   | 2              | 70             | 0      | 0      | 0      | 0      | 0      | 0      | 0      | 0      | 0      | 0      | 0      | 0      | 0      | 0      | 0      | 0      | 0      |
| Acidobacterium      | 2              | 91             | 0      | 0      | 0      | 0      | 0      | 0      | 0      | 0      | 0      | 0      | 0      | 0      | 0      | 0      | 0      | 0      | 0      |
| Acidocella          | 1              | 2              | 0      | 0      | 0      | 0      | 0      | 0      | 0      | 0      | 0      | 0      | 0      | 0      | 0      | 0      | 0      | 0      | 0      |
| Acidothermus        | 2              | 68             | 0      | 0      | 0      | 0      | 0      | 0      | 0      | 0      | 0      | 0      | 0      | 0      | 0      | 0      | 0      | 0      | 0      |
| Acidovorax          | 3              | 217            | 0      | 0      | 0      | 0      | 0      | 0      | 0      | 1      | 0      | 0      | 0      | 0      | 1      | 1      | 1      | 0      | 0      |
| Aciduliprofundum    | 1              | 11             | 0      | 0      | 0      | 0      | 0      | 0      | 0      | 0      | 0      | 0      | 0      | 0      | 0      | 0      | 0      | 0      | 0      |
| Acinetobacter       | 3              | 188            | 0      | 0      | 0      | 0      | 0      | 0      | 0      | 1      | 0      | 0      | 0      | 0      | 0      | 0      | 0      | 0      | 0      |
| Actinobacillus      | 2              | 112            | 0      | 0      | 0      | 0      | 0      | 0      | 0      | 0      | 0      | 0      | 0      | 0      | 0      | 0      | 0      | 0      | 0      |
| Actinomadura        | 1              | 1              | 0      | 0      | 0      | 0      | 0      | 0      | 0      | 0      | 0      | 0      | 0      | 0      | 0      | 0      | 0      | 0      | 0      |
| Actinoplanes        | 1              | 52             | 1      | 0      | 1      | 1      | 1      | 1      | 0      | 0      | 0      | 0      | 1      | 0      | 0      | 0      | 0      | 0      | 0      |
| Actinopolyspora     | 1              | 2              | 0      | 0      | 0      | 0      | 0      | 0      | 0      | 0      | 0      | 0      | 0      | 0      | 0      | 0      | 0      | 0      | 0      |
| Actinosynnema       | 2              | 122            | 0      | 0      | 0      | 0      | 0      | 0      | 0      | 0      | 0      | 0      | 0      | 0      | 0      | 0      | 0      | 0      | 0      |
| Advenella           | 1              | 30             | 0      | 0      | 0      | 0      | 0      | 0      | 0      | 0      | 0      | 0      | 0      | 0      | 0      | 0      | 0      | 0      | 0      |
| Aequorivita         | 1              | 12             | 0      | 0      | 0      | 0      | 0      | 0      | 0      | 0      | 0      | 0      | 0      | 0      | 0      | 0      | 0      | 0      | 0      |
| Aerococcus          | 2              | 57             | 0      | 0      | 0      | 0      | 0      | 0      | 0      | 0      | 0      | 0      | 0      | 0      | 0      | 0      | 0      | 0      | 0      |
| Aeromonas           | 2              | 127            | 0      | 0      | 0      | 0      | 0      | 0      | 0      | 0      | 0      | 0      | 0      | 0      | 0      | 0      | 0      | 0      | 0      |
| Aeropyrum           | 1              | 13             | 0      | 0      | 0      | 0      | 0      | 0      | 0      | 0      | 0      | 0      | 0      | 0      | 0      | 0      | 0      | 0      | 0      |
| Afipia              | 1              | 54             | 0      | 0      | 0      | 0      | 0      | 0      | 0      | 0      | 0      | 0      | 0      | 0      | 0      | 0      | 1      | 0      | 0      |
| Aggregatibacter     | 1              | 81             | 0      | 0      | 0      | 0      | 0      | 0      | 0      | 0      | 0      | 0      | 0      | 0      | 0      | 0      | 0      | 0      | 0      |
| Agrobacterium       | 2              | 242            | 0      | 0      | 1      | 0      | 0      | 0      | 0      | 0      | 0      | 0      | 1      | 1      | 0      | 0      | 0      | 0      | 0      |
| Ahrensia            | 1              | 2              | 0      | 0      | 0      | 0      | 0      | 0      | 0      | 0      | 0      | 0      | 0      | 0      | 0      | 0      | 0      | 0      | 0      |
| Akkermansia         | 2              | 47             | 0      | 0      | 0      | 0      | 0      | 0      | 0      | 0      | 0      | 0      | 0      | 0      | 0      | 0      | 0      | 0      | 0      |
| Albidiferax         | 3              | 144            | 0      | 0      | 0      | 0      | 0      | 0      | 0      | 0      | 0      | 0      | 0      | 0      | 0      | 0      | 0      | 0      | 0      |
| Alcaligenes         | 1              | 21             | 0      | 0      | 0      | 0      | 0      | 0      | 0      | 0      | 0      | 0      | 0      | 0      | 0      | 0      | 0      | 0      | 0      |
| Alcanivorax         | 2              | 146            | 0      | 0      | 0      | 0      | 0      | 0      | 0      | 0      | 0      | 0      | 0      | 0      | 0      | 1      | 1      | 0      | 0      |
| Alicyclophilus      | 3              | 152            | 0      | 0      | 0      | 0      | 0      | 0      | 0      | 1      | 0      | 0      | 0      | 0      | 0      | 0      | 0      | 0      | 0      |
| Alicyclobacillus    | 2              | 91             | 0      | 0      | 0      | 0      | 0      | 0      | 0      | 0      | 0      | 0      | 0      | 0      | 1      | 1      | 0      | 0      | 0      |
| Aliivibrio          | 2              | 118            | 0      | 0      | 0      | 0      | 0      | 0      | 0      | 0      | 0      | 0      | 0      | 0      | 0      | 0      | 0      | 0      | 0      |
| Alishewanella       | 1              | 1              | 0      | 0      | 0      | 0      | 0      | 0      | 0      | 0      | 0      | 0      | 0      | 0      | 0      | 0      | 0      | 0      | 0      |
| Alistipes           | 1              | 52             | 0      | 0      | 0      | 0      | 0      | 0      | 0      | 0      | 0      | 0      | 0      | 0      | 0      | 0      | 0      | 0      | 0      |
| Alkalilimnicola     | 2              | 97             | 0      | 0      | 0      | 0      | 0      | 0      | 0      | 0      | 0      | 0      | 0      | 0      | 0      | 0      | 0      | 0      | 0      |
| Alkaliphilus        | 2              | 62             | 0      | 0      | 0      | 0      | 0      | 0      | 0      | 0      | 0      | 0      | 0      | 0      | 0      | 0      | 0      | 0      | 0      |
| Allochromatium      | 2              | 84             | 0      | 0      | 0      | 0      | 0      | 0      | 0      | 0      | 0      | 0      | 0      | 0      | 0      | 0      | 0      | 0      | 0      |
| Alphaproteobacteria | 1              | 3              | 0      | 0      | 0      | 0      | 0      | 0      | 0      | 0      | 0      | 0      | 0      | 0      | 0      | 0      | 0      | 0      | 0      |
| Alteromonadales     | 1              | 12             | 0      | 0      | 0      | 0      | 0      | 0      | 0      | 0      | 0      | 0      | 0      | 0      | 0      | 0      | 0      | 0      | 0      |
| Alteromonas         | 1              | 37             | 0      | 0      | 0      | 0      | 0      | 0      | 0      | 0      | 0      | 0      | 0      | 0      | 0      | 0      | 0      | 0      | 0      |
| Aminobacter         | 1              | 4              | 0      | 0      | 0      | 0      | 0      | 0      | 0      | 0      | 0      | 0      | 0      | 0      | 0      | 0      | 0      | 0      | 0      |
| Aminobacterium      | 2              | 59             | 0      | 0      | 0      | 0      | 0      | 0      | 0      | 0      | 0      | 0      | 0      | 0      | 0      | 0      | 0      | 0      | 0      |

| Genus            | Cluster Number | Protein Counts | K15982 | K16045 | K16047 | K16049 | K16050 | K16051 | K16173 | K16249 | K16269 | K16270 | K16514 | K16873 | K16874 | K16876 | K16880 | K17067 | K17070 |
|------------------|----------------|----------------|--------|--------|--------|--------|--------|--------|--------|--------|--------|--------|--------|--------|--------|--------|--------|--------|--------|
| Ammonifex        | 2              | 50             | 0      | 0      | 0      | 0      | 0      | 0      | 0      | 0      | 0      | 0      | 0      | 0      | 0      | 0      | 0      | 0      | 0      |
| Amphibacillus    | 1              | 13             | 0      | 0      | 0      | 0      | 0      | 0      | 0      | 0      | 0      | 0      | 0      | 0      | 0      | 0      | 0      | 0      | 0      |
| Amphritea        | 1              | 2              | 0      | 0      | 0      | 0      | 0      | 0      | 0      | 0      | 0      | 0      | 0      | 0      | 0      | 0      | 0      | 0      | 0      |
| Amycolatopsis    | 2              | 201            | 1      | 0      | 1      | 1      | 1      | 1      | 0      | 0      | 0      | 0      | 0      | 0      | 0      | 0      | 0      | 0      | 0      |
| Amycolicoccus    | 1              | 43             | 1      | 0      | 1      | 1      | 1      | 0      | 0      | 0      | 0      | 0      | 0      | 0      | 0      | 0      | 0      | 1      | 0      |
| Anabaena         | 2              | 92             | 0      | 0      | 0      | 0      | 0      | 0      | 0      | 0      | 0      | 0      | 0      | 0      | 0      | 0      | 0      | 0      | 0      |
| Anaerobaculum    | 1              | 11             | 0      | 0      | 0      | 0      | 0      | 0      | 0      | 0      | 0      | 0      | 0      | 0      | 0      | 0      | 0      | 0      | 0      |
| Anaerococcus     | 2              | 46             | 0      | 0      | 0      | 0      | 0      | 0      | 0      | 0      | 0      | 0      | 0      | 0      | 0      | 0      | 0      | 0      | 0      |
| Anaerolinea      | 2              | 66             | 0      | 0      | 0      | 0      | 0      | 0      | 0      | 0      | 0      | 0      | 0      | 0      | 0      | 0      | 0      | 0      | 0      |
| Anaeromyxobacter | 3              | 117            | 0      | 0      | 0      | 0      | 0      | 0      | 0      | 0      | 0      | 0      | 0      | 0      | 0      | 0      | 0      | 0      | 0      |
| Anaerostipes     | 1              | 44             | 0      | 0      | 0      | 0      | 0      | 0      | 0      | 0      | 0      | 0      | 0      | 0      | 0      | 0      | 0      | 0      | 0      |
| Anaerotruncus    | 1              | 2              | 0      | 0      | 0      | 0      | 0      | 0      | 0      | 0      | 0      | 0      | 0      | 0      | 0      | 0      | 0      | 0      | 0      |
| Anaplasma        | 1              | 35             | 0      | 0      | 0      | 0      | 0      | 0      | 0      | 0      | 0      | 0      | 0      | 0      | 0      | 0      | 0      | 0      | 0      |
| Ancylobacter     | 1              | 3              | 0      | 0      | 0      | 0      | 0      | 0      | 0      | 0      | 0      | 0      | 0      | 0      | 0      | 0      | 0      | 0      | 0      |
| Aneurinibacillus | 1              | 1              | 0      | 0      | 0      | 0      | 0      | 0      | 0      | 0      | 0      | 0      | 0      | 0      | 0      | 0      | 0      | 0      | 0      |
| Angomonas        | 1              | 1              | 0      | 0      | 0      | 0      | 0      | 0      | 0      | 0      | 0      | 0      | 0      | 0      | 0      | 0      | 0      | 0      | 0      |
| Anoxybacillus    | 2              | 72             | 0      | 0      | 0      | 0      | 0      | 0      | 1      | 0      | 0      | 0      | 0      | 0      | 0      | 0      | 0      | 0      | 0      |
| Aquifex          | 2              | 45             | 0      | 0      | 0      | 0      | 0      | 0      | 0      | 0      | 0      | 0      | 0      | 0      | 0      | 0      | 0      | 0      | 0      |
| Aquimarina       | 1              | 2              | 0      | 0      | 0      | 0      | 0      | 0      | 0      | 0      | 0      | 0      | 0      | 0      | 0      | 0      | 0      | 0      | 0      |
| Arcanobacterium  | 2              | 45             | 0      | 0      | 0      | 0      | 0      | 0      | 0      | 0      | 0      | 0      | 0      | 0      | 0      | 0      | 0      | 0      | 0      |
| Archaeoglobus    | 1              | 14             | 0      | 0      | 0      | 0      | 0      | 0      | 0      | 0      | 0      | 0      | 0      | 0      | 0      | 0      | 0      | 0      | 0      |
| Arcobacter       | 2              | 101            | 0      | 0      | 0      | 0      | 0      | 0      | 0      | 1      | 0      | 0      | 0      | 0      | 0      | 0      | 0      | 0      | 0      |
| Aromatoleum      | 3              | 133            | 0      | 0      | 0      | 0      | 0      | 0      | 0      | 0      | 0      | 0      | 0      | 0      | 0      | 0      | 0      | 0      | 0      |
| Arsenophonus     | 1              | 4              | 0      | 0      | 0      | 0      | 0      | 0      | 0      | 0      | 0      | 0      | 0      | 0      | 0      | 0      | 0      | 0      | 0      |
| Arthrobacter     | 2              | 206            | 0      | 0      | 0      | 0      | 0      | 0      | 0      | 0      | 0      | 0      | 1      | 0      | 0      | 0      | 0      | 0      | 0      |
| Arthrospira      | 2              | 67             | 0      | 0      | 0      | 0      | 0      | 0      | 0      | 0      | 0      | 0      | 0      | 0      | 0      | 0      | 0      | 0      | 0      |
| Aster            | 1              | 10             | 0      | 0      | 0      | 0      | 0      | 0      | 0      | 0      | 0      | 0      | 0      | 0      | 0      | 0      | 0      | 0      | 0      |
| Asticcacaulis    | 2              | 103            | 0      | 0      | 0      | 0      | 0      | 0      | 0      | 0      | 0      | 0      | 1      | 0      | 0      | 0      | 0      | 0      | 0      |
| Atopobium        | 1              | 28             | 0      | 0      | 0      | 0      | 0      | 0      | 0      | 0      | 0      | 0      | 0      | 0      | 0      | 0      | 0      | 0      | 0      |
| Aurantimonas     | 1              | 2              | 0      | 0      | 0      | 0      | 0      | 0      | 0      | 0      | 0      | 0      | 0      | 0      | 0      | 0      | 0      | 0      | 0      |
| Avibacterium     | 1              | 17             | 0      | 0      | 0      | 0      | 0      | 0      | 0      | 0      | 0      | 0      | 0      | 0      | 0      | 0      | 0      | 0      | 0      |
| Azoarcus         | 3              | 172            | 0      | 0      | 0      | 0      | 0      | 0      | 0      | 1      | 0      | 0      | 1      | 0      | 0      | 0      | 0      | 0      | 0      |
| Azorhizobium     | 3              | 149            | 0      | 0      | 0      | 0      | 0      | 0      | 0      | 0      | 0      | 0      | 0      | 0      | 0      | 0      | 0      | 0      | 0      |
| Azorhizophilus   | 1              | 4              | 0      | 0      | 0      | 0      | 0      | 0      | 0      | 0      | 0      | 0      | 0      | 0      | 0      | 0      | 0      | 0      | 0      |
| Azospira         | 1              | 19             | 0      | 0      | 0      | 0      | 0      | 0      | 0      | 0      | 0      | 0      | 0      | 0      | 0      | 0      | 0      | 0      | 0      |
| Azospirillum     | 2              | 198            | 0      | 0      | 0      | 0      | 0      | 0      | 0      | 0      | 0      | 0      | 1      | 0      | 1      | 1      | 1      | 0      | 0      |
| Azotobacter      | 3              | 183            | 0      | 0      | 1      | 0      | 0      | 0      | 0      | 1      | 0      | 0      | 1      | 0      | 0      | 0      | 0      | 0      | 0      |
| Bacillales       | 1              | 9              | 0      | 0      | 0      | 0      | 0      | 0      | 0      | 0      | 0      | 0      | 0      | 0      | 0      | 0      | 0      | 0      | 0      |
| Bacilli          | 1              | 3              | 0      | 0      | 0      | 0      | 0      | 0      | 0      | 0      | 0      | 0      | 0      | 0      | 0      | 0      | 0      | 0      | 0      |
| Bacillus         | 2              | 237            | 0      | 0      | 0      | 0      | 0      | 0      | 1      | 0      | 0      | 0      | 0      | 0      | 0      | 0      | 0      | 0      | 0      |
| Bacteria         | 2              | 86             | 0      | 0      | 0      | 0      | 0      | 0      | 0      | 0      | 0      | 0      | 0      | 0      | 0      | 0      | 0      | 0      | 0      |
| Bacteriovorax    | 2              | 98             | 0      | 0      | 0      | 0      | 0      | 0      | 0      | 0      | 0      | 0      | 0      | 0      | 0      | 0      | 0      | 0      | 0      |
| Bacteroidales    | 2              | 59             | 0      | 0      | 0      | 0      | 0      | 0      | 0      | 0      | 0      | 0      | 0      | 0      | 0      | 0      | 0      | 0      | 0      |
| Bacteroides      | 2              | 96             | 0      | 0      | 0      | 0      | 0      | 0      | 0      | 0      | 0      | 0      | 0      | 0      | 0      | 0      | 0      | 0      | 0      |
| Bacteroidetes    | 1              | 2              | 0      | 0      | 0      | 0      | 0      | 0      | 0      | 0      | 0      | 0      | 0      | 0      | 0      | 0      | 0      | 0      | 0      |
| Bartonella       | 2              | 50             | 0      | 0      | 0      | 0      | 0      | 0      | 0      | 0      | 0      | 0      | 0      | 0      | 0      | 0      | 0      | 0      | 0      |
| Baumannia        | 2              | 24             | 0      | 0      | 0      | 0      | 0      | 0      | 0      | 0      | 0      | 0      | 0      | 0      | 0      | 0      | 0      | 0      | 0      |
| Bdellovibrio     | 2              | 87             | 0      | 0      | 0      | 0      | 0      | 0      | 0      | 0      | 0      | 0      | 0      | 0      | 0      | 0      | 0      | 0      | 0      |
| Beijerinckia     | 3              | 123            | 0      | 0      | 0      | 0      | 0      | 0      | 0      | 0      | 0      | 0      | 0      | 0      | 0      | 0      | 0      | 0      | 0      |
| Belliella        | 1              | 14             | 0      | 0      | 0      | 0      | 0      | 0      | 0      | 0      | 0      | 0      | 0      | 0      | 0      | 0      | 0      | 0      | 0      |
| Beutenbergia     | 2              | 82             | 0      | 0      | 0      | 0      | 0      | 0      | 0      | 0      | 0      | 0      | 0      | 0      | 0      | 0      | 0      | 0      | 0      |
| Bifidobacterium  | 2              | 61             | 0      | 0      | 0      | 0      | 0      | 0      | 0      | 0      | 0      | 0      | 0      | 0      | 0      | 0      | 0      | 0      | 0      |

| Genus                | Cluster Number | Protein Counts | K15982 | K16045 | K16047 | K16049 | K16050 | K16051 | K16173 | K16249 | K16269 | K16270 | K16514 | K16873 | K16874 | K16876 | K16880 | K17067 | K17070 |
|----------------------|----------------|----------------|--------|--------|--------|--------|--------|--------|--------|--------|--------|--------|--------|--------|--------|--------|--------|--------|--------|
| Bizionia             | 1              | 1              | 0      | 0      | 0      | 0      | 0      | 0      | 0      | 0      | 0      | 0      | 0      | 0      | 0      | 0      | 0      | 0      | 0      |
| Blastococcus         | 1              | 39             | 0      | 0      | 0      | 0      | 0      | 0      | 0      | 0      | 0      | 0      | 1      | 0      | 0      | 0      | 0      | 0      | 0      |
| Blattabacterium      | 1              | 23             | 0      | 0      | 0      | 0      | 0      | 0      | 0      | 0      | 0      | 0      | 0      | 0      | 0      | 0      | 0      | 0      | 0      |
| Blautia              | 1              | 22             | 0      | 0      | 0      | 0      | 0      | 0      | 0      | 0      | 0      | 0      | 0      | 0      | 0      | 0      | 0      | 0      | 0      |
| Bordetella           | 3              | 227            | 0      | 0      | 0      | 0      | 1      | 0      | 0      | 0      | 0      | 0      | 0      | 0      | 0      | 0      | 0      | 0      | 0      |
| Borrelia             | 1              | 32             | 0      | 0      | 0      | 0      | 0      | 0      | 0      | 0      | 0      | 0      | 0      | 0      | 0      | 0      | 0      | 0      | 0      |
| Brachybacterium      | 1              | 18             | 0      | 0      | 0      | 0      | 0      | 0      | 0      | 0      | 0      | 0      | 0      | 0      | 0      | 0      | 0      | 0      | 0      |
| Brachymonas          | 1              | 4              | 0      | 0      | 0      | 0      | 0      | 0      | 0      | 0      | 0      | 0      | 0      | 0      | 0      | 0      | 0      | 0      | 0      |
| Brachyspira          | 2              | 79             | 0      | 0      | 0      | 0      | 0      | 0      | 0      | 0      | 0      | 0      | 0      | 0      | 0      | 0      | 0      | 0      | 0      |
| Bradyrhizobiaceae    | 1              | 20             | 0      | 0      | 0      | 0      | 0      | 0      | 0      | 0      | 0      | 0      | 0      | 0      | 0      | 0      | 0      | 0      | 0      |
| Bradyrhizobium       | 3              | 254            | 0      | 0      | 1      | 0      | 0      | 0      | 0      | 0      | 0      | 0      | 0      | 1      | 1      | 1      | 1      | 0      | 0      |
| Brenneria            | 1              | 20             | 0      | 0      | 0      | 0      | 0      | 0      | 0      | 0      | 0      | 0      | 0      | 0      | 0      | 0      | 0      | 0      | 0      |
| Brevibacillus        | 2              | 122            | 0      | 0      | 0      | 0      | 0      | 0      | 0      | 0      | 0      | 0      | 0      | 0      | 0      | 0      | 0      | 0      | 0      |
| Brevibacterium       | 1              | 4              | 0      | 0      | 0      | 0      | 0      | 0      | 0      | 0      | 0      | 0      | 0      | 0      | 0      | 0      | 0      | 0      | 0      |
| Brevundimonas        | 2              | 105            | 0      | 0      | 0      | 0      | 0      | 0      | 0      | 0      | 0      | 0      | 1      | 0      | 0      | 0      | 0      | 0      | 0      |
| Brucella             | 3              | 138            | 0      | 0      | 0      | 0      | 0      | 0      | 0      | 0      | 0      | 0      | 0      | 0      | 0      | 0      | 0      | 0      | 0      |
| Buchnera             | 1              | 26             | 0      | 0      | 0      | 0      | 0      | 0      | 0      | 0      | 0      | 0      | 0      | 0      | 0      | 0      | 0      | 0      | 0      |
| Burkholderia         | 3              | 424            | 1      | 0      | 1      | 1      | 1      | 0      | 0      | 1      | 0      | 0      | 1      | 1      | 1      | 1      | 1      | 0      | 0      |
| Burkholderiaceae     | 3              | 143            | 0      | 0      | 0      | 0      | 0      | 0      | 0      | 1      | 0      | 0      | 0      | 0      | 0      | 0      | 0      | 0      | 0      |
| Burkholderiales      | 1              | 24             | 0      | 0      | 0      | 0      | 0      | 0      | 0      | 0      | 0      | 0      | 0      | 0      | 0      | 0      | 0      | 0      | 0      |
| Buttiauxella         | 1              | 2              | 0      | 0      | 0      | 0      | 0      | 0      | 0      | 0      | 0      | 0      | 0      | 0      | 0      | 0      | 0      | 0      | 0      |
| Butyrivibrio         | 2              | 67             | 0      | 0      | 0      | 0      | 0      | 0      | 0      | 0      | 0      | 0      | 0      | 0      | 0      | 0      | 0      | 0      | 0      |
| Caldanaerobacter     | 2              | 63             | 0      | 0      | 0      | 0      | 0      | 0      | 0      | 0      | 0      | 0      | 0      | 0      | 0      | 0      | 0      | 0      | 0      |
| Caldicellulosiruptor | 2              | 75             | 0      | 0      | 0      | 0      | 0      | 0      | 0      | 0      | 0      | 0      | 0      | 0      | 0      | 0      | 0      | 0      | 0      |
| Caldilinea           | 1              | 23             | 0      | 0      | 0      | 0      | 0      | 0      | 0      | 0      | 0      | 0      | 0      | 0      | 0      | 0      | 0      | 0      | 0      |
| Caldimonas           | 1              | 6              | 0      | 0      | 0      | 0      | 0      | 0      | 0      | 0      | 0      | 0      | 0      | 0      | 0      | 0      | 0      | 0      | 0      |
| Caldisericum         | 1              | 10             | 0      | 0      | 0      | 0      | 0      | 0      | 0      | 0      | 0      | 0      | 0      | 0      | 0      | 0      | 0      | 0      | 0      |
| Caldisphaera         | 1              | 7              | 0      | 0      | 0      | 0      | 0      | 0      | 0      | 0      | 0      | 0      | 0      | 0      | 0      | 0      | 0      | 0      | 0      |
| Calditerrivibrio     | 2              | 74             | 0      | 0      | 0      | 0      | 0      | 0      | 0      | 0      | 0      | 0      | 0      | 0      | 0      | 0      | 0      | 0      | 0      |
| Caldivirga           | 1              | 13             | 0      | 0      | 0      | 0      | 0      | 0      | 0      | 0      | 0      | 0      | 0      | 0      | 0      | 0      | 0      | 0      | 0      |
| Calothrix            | 1              | 43             | 0      | 0      | 0      | 0      | 0      | 0      | 0      | 0      | 0      | 0      | 0      | 0      | 0      | 0      | 0      | 0      | 0      |
| Calyptogena          | 2              | 34             | 0      | 0      | 0      | 0      | 0      | 0      | 0      | 0      | 0      | 0      | 0      | 0      | 0      | 0      | 0      | 0      | 0      |
| Campylobacter        | 2              | 80             | 0      | 0      | 0      | 0      | 0      | 0      | 0      | 0      | 0      | 0      | 0      | 0      | 0      | 0      | 0      | 0      | 0      |
| Candidatus           | 2              | 290            | 0      | 0      | 0      | 0      | 0      | 0      | 0      | 0      | 0      | 0      | 1      | 0      | 0      | 0      | 0      | 0      | 0      |
| Capnocytophaga       | 1              | 50             | 0      | 0      | 0      | 0      | 0      | 0      | 0      | 0      | 0      | 0      | 0      | 0      | 0      | 0      | 0      | 0      | 0      |
| Carbophilus          | 1              | 2              | 0      | 0      | 0      | 0      | 0      | 0      | 0      | 0      | 0      | 0      | 0      | 0      | 0      | 0      | 0      | 0      | 0      |
| Carboxydibrachium    | 1              | 14             | 0      | 0      | 0      | 0      | 0      | 0      | 0      | 0      | 0      | 0      | 0      | 0      | 0      | 0      | 0      | 0      | 0      |
| Carboxydotherrmus    | 2              | 68             | 0      | 0      | 0      | 0      | 0      | 0      | 1      | 0      | 0      | 0      | 0      | 0      | 1      | 0      | 0      | 0      | 0      |
| Carica               | 1              | 2              | 0      | 0      | 0      | 0      | 0      | 0      | 0      | 0      | 0      | 0      | 0      | 0      | 0      | 0      | 0      | 0      | 0      |
| Carnobacterium       | 2              | 71             | 0      | 0      | 0      | 0      | 0      | 0      | 0      | 0      | 0      | 0      | 0      | 0      | 0      | 0      | 0      | 0      | 0      |
| Catenibacterium      | 1              | 2              | 0      | 0      | 0      | 0      | 0      | 0      | 0      | 0      | 0      | 0      | 0      | 0      | 0      | 0      | 0      | 0      | 0      |
| Catenovulum          | 1              | 2              | 0      | 0      | 0      | 0      | 0      | 0      | 0      | 0      | 0      | 0      | 0      | 0      | 0      | 0      | 0      | 0      | 0      |
| Catenulispora        | 3              | 159            | 0      | 0      | 0      | 0      | 0      | 0      | 0      | 0      | 0      | 0      | 0      | 0      | 0      | 0      | 0      | 0      | 0      |
| Caulobacter          | 3              | 168            | 0      | 0      | 1      | 0      | 0      | 0      | 0      | 0      | 0      | 0      | 0      | 0      | 0      | 0      | 0      | 0      | 0      |
| Cedecea              | 1              | 45             | 0      | 0      | 0      | 0      | 0      | 0      | 0      | 0      | 0      | 0      | 0      | 0      | 0      | 0      | 0      | 0      | 0      |
| Cellulomonas         | 2              | 96             | 0      | 0      | 0      | 0      | 0      | 0      | 0      | 0      | 0      | 0      | 0      | 0      | 0      | 0      | 0      | 0      | 0      |
| Cellulophaga         | 2              | 105            | 0      | 0      | 0      | 0      | 0      | 0      | 0      | 0      | 0      | 0      | 0      | 0      | 0      | 0      | 0      | 0      | 0      |
| Cellulosilyticum     | 1              | 14             | 0      | 0      | 0      | 0      | 0      | 0      | 0      | 0      | 0      | 0      | 0      | 0      | 0      | 0      | 0      | 0      | 0      |
| Cellvibrio           | 2              | 85             | 0      | 0      | 0      | 0      | 0      | 0      | 0      | 0      | 0      | 0      | 0      | 0      | 0      | 0      | 0      | 0      | 0      |
| Cenarchaeum          | 1              | 7              | 0      | 0      | 0      | 0      | 0      | 0      | 0      | 0      | 0      | 0      | 0      | 0      | 0      | 0      | 0      | 0      | 0      |
| Chamaesiphon         | 1              | 13             | 0      | 0      | 0      | 0      | 0      | 0      | 0      | 0      | 0      | 0      | 0      | 0      | 0      | 0      | 0      | 0      | 0      |
| Chelativorans        | 3              | 136            | 0      | 0      | 0      | 0      | 0      | 0      | 0      | 0      | 0      | 0      | 0      | 0      | 0      | 0      | 0      | 0      | 0      |

| Genus                  | Cluster Number | Protein Counts | K15982 | K16045 | K16047 | K16049 | K16050 | K16051 | K16173 | K16249 | K16269 | K16270 | K16514 | K16873 | K16874 | K16876 | K16880 | K17067 | K17070 |
|------------------------|----------------|----------------|--------|--------|--------|--------|--------|--------|--------|--------|--------|--------|--------|--------|--------|--------|--------|--------|--------|
| Chelatococcus          | 1              | 2              | 0      | 0      | 0      | 0      | 0      | 0      | 0      | 0      | 0      | 0      | 0      | 0      | 0      | 0      | 0      | 0      | 0      |
| Chitinophaga           | 2              | 98             | 0      | 0      | 0      | 0      | 0      | 0      | 0      | 0      | 0      | 0      | 0      | 0      | 0      | 0      | 0      | 0      | 0      |
| Chlamydia              | 1              | 36             | 0      | 0      | 0      | 0      | 0      | 0      | 0      | 0      | 0      | 0      | 0      | 0      | 0      | 0      | 0      | 0      | 0      |
| Chlamydomonas          | 1              | 3              | 0      | 0      | 0      | 0      | 0      | 0      | 0      | 0      | 0      | 0      | 0      | 0      | 0      | 0      | 0      | 0      | 0      |
| Chlamydomphila         | 1              | 31             | 0      | 0      | 0      | 0      | 0      | 0      | 0      | 0      | 0      | 0      | 0      | 0      | 0      | 0      | 0      | 0      | 0      |
| Chlorobaculum          | 2              | 61             | 0      | 0      | 0      | 0      | 0      | 0      | 0      | 0      | 0      | 0      | 0      | 0      | 0      | 0      | 0      | 0      | 0      |
| Chlorobium             | 2              | 89             | 0      | 0      | 0      | 0      | 0      | 0      | 0      | 0      | 0      | 0      | 0      | 0      | 0      | 0      | 0      | 0      | 0      |
| Chlorobium/Pelodictyon | 1              | 2              | 0      | 0      | 0      | 0      | 0      | 0      | 0      | 0      | 0      | 0      | 0      | 0      | 0      | 0      | 0      | 0      | 0      |
| Chloroflexus           | 2              | 105            | 0      | 0      | 0      | 0      | 0      | 0      | 0      | 0      | 0      | 0      | 0      | 0      | 0      | 0      | 0      | 0      | 0      |
| Chlorogloeopsis        | 1              | 9              | 0      | 0      | 0      | 0      | 0      | 0      | 0      | 0      | 0      | 0      | 0      | 0      | 0      | 0      | 0      | 0      | 0      |
| Chloroherpeton         | 2              | 59             | 0      | 0      | 0      | 0      | 0      | 0      | 0      | 0      | 0      | 0      | 0      | 0      | 0      | 0      | 0      | 0      | 0      |
| Chromobacterium        | 2              | 117            | 0      | 0      | 0      | 0      | 0      | 0      | 0      | 0      | 0      | 0      | 0      | 0      | 0      | 0      | 0      | 0      | 0      |
| Chromohalobacter       | 2              | 145            | 0      | 0      | 0      | 0      | 0      | 0      | 0      | 0      | 0      | 0      | 1      | 0      | 0      | 1      | 0      | 0      | 0      |
| Chroococciopsis        | 1              | 24             | 0      | 0      | 0      | 0      | 0      | 0      | 0      | 0      | 0      | 0      | 0      | 0      | 0      | 0      | 0      | 0      | 0      |
| Chryseobacterium       | 2              | 104            | 0      | 0      | 0      | 0      | 0      | 0      | 0      | 0      | 0      | 0      | 1      | 0      | 0      | 0      | 0      | 0      | 0      |
| Citricella             | 1              | 13             | 0      | 0      | 0      | 0      | 0      | 0      | 0      | 0      | 0      | 0      | 0      | 0      | 0      | 0      | 0      | 0      | 0      |
| Citrobacter            | 2              | 190            | 0      | 0      | 0      | 0      | 0      | 0      | 0      | 0      | 0      | 0      | 1      | 0      | 0      | 0      | 0      | 0      | 0      |
| Clavibacter            | 2              | 83             | 0      | 0      | 0      | 0      | 0      | 0      | 0      | 0      | 0      | 0      | 0      | 0      | 0      | 0      | 0      | 0      | 0      |
| Clonorchis             | 1              | 1              | 0      | 0      | 0      | 0      | 0      | 0      | 0      | 0      | 0      | 0      | 0      | 0      | 0      | 0      | 0      | 0      | 0      |
| Clostridiales          | 2              | 77             | 0      | 0      | 0      | 0      | 0      | 0      | 0      | 0      | 0      | 0      | 0      | 0      | 0      | 0      | 0      | 0      | 0      |
| Clostridium            | 2              | 191            | 0      | 0      | 0      | 0      | 0      | 0      | 0      | 0      | 0      | 0      | 0      | 0      | 0      | 0      | 0      | 0      | 0      |
| Cohnella               | 1              | 2              | 0      | 0      | 0      | 0      | 0      | 0      | 0      | 0      | 0      | 0      | 0      | 0      | 0      | 0      | 0      | 0      | 0      |
| Coleofasciculus        | 1              | 4              | 0      | 0      | 0      | 0      | 0      | 0      | 0      | 0      | 0      | 0      | 0      | 0      | 0      | 0      | 0      | 0      | 0      |
| Collimonas             | 1              | 35             | 0      | 0      | 0      | 0      | 0      | 0      | 0      | 0      | 0      | 0      | 0      | 0      | 0      | 0      | 0      | 0      | 0      |
| Colwellia              | 2              | 130            | 0      | 0      | 0      | 0      | 0      | 0      | 0      | 0      | 0      | 0      | 0      | 0      | 0      | 0      | 0      | 0      | 0      |
| Comamonas              | 2              | 196            | 1      | 0      | 1      | 1      | 1      | 1      | 0      | 1      | 0      | 0      | 0      | 0      | 0      | 0      | 0      | 0      | 0      |
| Conexibacter           | 3              | 117            | 0      | 0      | 0      | 0      | 0      | 0      | 0      | 0      | 0      | 0      | 0      | 0      | 0      | 0      | 0      | 0      | 0      |
| Coprobacillus          | 1              | 2              | 0      | 0      | 0      | 0      | 0      | 0      | 0      | 0      | 0      | 0      | 0      | 0      | 0      | 0      | 0      | 0      | 0      |
| Coprococcus            | 2              | 76             | 0      | 0      | 0      | 0      | 0      | 0      | 0      | 0      | 0      | 0      | 0      | 0      | 0      | 0      | 0      | 0      | 0      |
| Coprothermobacter      | 2              | 45             | 0      | 0      | 0      | 0      | 0      | 0      | 0      | 0      | 0      | 0      | 0      | 0      | 0      | 0      | 0      | 0      | 0      |
| Coralimargarita        | 2              | 68             | 0      | 0      | 0      | 0      | 0      | 0      | 0      | 0      | 0      | 0      | 0      | 0      | 0      | 0      | 0      | 0      | 0      |
| Corallococcus          | 1              | 29             | 0      | 0      | 0      | 0      | 0      | 0      | 0      | 0      | 0      | 0      | 0      | 0      | 0      | 0      | 0      | 0      | 0      |
| Coriobacterium         | 2              | 36             | 0      | 0      | 0      | 0      | 0      | 0      | 0      | 0      | 0      | 0      | 0      | 0      | 0      | 0      | 0      | 0      | 0      |
| Corynebacterineae      | 1              | 5              | 0      | 0      | 0      | 0      | 0      | 0      | 0      | 0      | 0      | 0      | 0      | 0      | 0      | 0      | 0      | 0      | 0      |
| Corynebacterium        | 2              | 175            | 0      | 0      | 0      | 0      | 0      | 0      | 0      | 0      | 0      | 0      | 0      | 0      | 0      | 0      | 0      | 0      | 0      |
| Coxiella               | 2              | 54             | 0      | 0      | 0      | 0      | 0      | 0      | 0      | 0      | 0      | 0      | 0      | 0      | 0      | 0      | 0      | 0      | 0      |
| Crinalium              | 1              | 21             | 0      | 0      | 0      | 0      | 0      | 0      | 0      | 0      | 0      | 0      | 0      | 0      | 0      | 0      | 0      | 0      | 0      |
| Croceibacter           | 2              | 80             | 0      | 0      | 0      | 0      | 0      | 0      | 0      | 0      | 0      | 0      | 0      | 0      | 0      | 0      | 0      | 0      | 0      |
| Crocospaera            | 1              | 6              | 0      | 0      | 0      | 0      | 0      | 0      | 0      | 0      | 0      | 0      | 0      | 0      | 0      | 0      | 0      | 0      | 0      |
| Cronobacter            | 2              | 120            | 0      | 0      | 0      | 0      | 0      | 0      | 0      | 0      | 0      | 0      | 0      | 0      | 0      | 0      | 0      | 0      | 0      |
| Cryptobacterium        | 2              | 39             | 0      | 0      | 0      | 0      | 0      | 0      | 0      | 0      | 0      | 0      | 0      | 0      | 0      | 0      | 0      | 0      | 0      |
| Cucumis                | 1              | 9              | 0      | 0      | 0      | 0      | 0      | 0      | 0      | 0      | 0      | 0      | 0      | 0      | 0      | 0      | 0      | 0      | 0      |
| Cupriavidus            | 3              | 317            | 1      | 0      | 1      | 1      | 1      | 1      | 0      | 1      | 0      | 0      | 0      | 0      | 0      | 1      | 1      | 0      | 0      |
| Curtobacterium         | 1              | 5              | 0      | 0      | 0      | 0      | 0      | 0      | 0      | 0      | 0      | 0      | 0      | 0      | 0      | 0      | 0      | 0      | 0      |
| Curvibacter            | 1              | 27             | 0      | 0      | 0      | 0      | 0      | 0      | 0      | 0      | 0      | 0      | 0      | 0      | 0      | 0      | 0      | 0      | 0      |
| Cyanobacterium         | 1              | 9              | 0      | 0      | 0      | 0      | 0      | 0      | 0      | 0      | 0      | 0      | 0      | 0      | 0      | 0      | 0      | 0      | 0      |
| Cyanobium              | 1              | 10             | 0      | 0      | 0      | 0      | 0      | 0      | 0      | 0      | 0      | 0      | 0      | 0      | 0      | 0      | 0      | 0      | 0      |
| Cyanothece             | 1              | 34             | 0      | 0      | 0      | 0      | 0      | 0      | 0      | 0      | 0      | 0      | 0      | 0      | 0      | 0      | 0      | 0      | 0      |
| Cyclobacterium         | 1              | 19             | 0      | 0      | 0      | 0      | 0      | 0      | 0      | 0      | 0      | 0      | 0      | 0      | 0      | 0      | 0      | 0      | 0      |
| Cycloclasticus         | 1              | 21             | 0      | 0      | 0      | 0      | 0      | 0      | 0      | 0      | 0      | 0      | 0      | 0      | 0      | 0      | 0      | 0      | 0      |
| Cylindrospermopsis     | 1              | 4              | 0      | 0      | 0      | 0      | 0      | 0      | 0      | 0      | 0      | 0      | 0      | 0      | 0      | 0      | 0      | 0      | 0      |
| Cylindrospermum        | 1              | 30             | 0      | 0      | 0      | 0      | 0      | 0      | 0      | 0      | 0      | 0      | 0      | 0      | 0      | 0      | 0      | 0      | 0      |

| Genus              | Cluster Number | Protein Counts | K15982 | K16045 | K16047 | K16049 | K16050 | K16051 | K16173 | K16249 | K16269 | K16270 | K16514 | K16873 | K16874 | K16876 | K16880 | K17067 | K17070 |
|--------------------|----------------|----------------|--------|--------|--------|--------|--------|--------|--------|--------|--------|--------|--------|--------|--------|--------|--------|--------|--------|
| Cytophaga          | 2              | 69             | 0      | 0      | 0      | 0      | 0      | 0      | 0      | 0      | 0      | 0      | 0      | 0      | 0      | 0      | 0      | 0      | 0      |
| Dactylococcopsis   | 1              | 8              | 0      | 0      | 0      | 0      | 0      | 0      | 0      | 0      | 0      | 0      | 0      | 0      | 0      | 0      | 0      | 0      | 0      |
| Dechloromonas      | 1              | 40             | 0      | 0      | 1      | 0      | 0      | 0      | 0      | 1      | 0      | 0      | 0      | 0      | 0      | 0      | 0      | 0      | 0      |
| Dechlorosoma       | 1              | 19             | 0      | 0      | 0      | 0      | 0      | 0      | 0      | 0      | 0      | 0      | 0      | 0      | 0      | 0      | 0      | 0      | 0      |
| Deferribacter      | 2              | 73             | 0      | 0      | 0      | 0      | 0      | 0      | 0      | 0      | 0      | 0      | 0      | 0      | 0      | 0      | 0      | 0      | 0      |
| Dehalobacter       | 1              | 9              | 0      | 0      | 0      | 0      | 0      | 0      | 0      | 0      | 0      | 0      | 0      | 0      | 0      | 0      | 0      | 0      | 0      |
| Dehalococcoides    | 2              | 41             | 0      | 0      | 0      | 0      | 0      | 0      | 0      | 0      | 0      | 0      | 0      | 0      | 0      | 0      | 0      | 0      | 0      |
| Dehalogenimonas    | 1              | 37             | 0      | 0      | 0      | 0      | 0      | 0      | 0      | 0      | 0      | 0      | 0      | 0      | 0      | 0      | 0      | 0      | 0      |
| Deinococcus        | 2              | 140            | 0      | 0      | 0      | 0      | 0      | 0      | 0      | 0      | 0      | 0      | 0      | 0      | 0      | 0      | 0      | 0      | 0      |
| Delftia            | 3              | 177            | 0      | 0      | 0      | 0      | 0      | 0      | 0      | 0      | 0      | 0      | 1      | 0      | 0      | 0      | 0      | 0      | 0      |
| Denitrovibrio      | 2              | 67             | 0      | 0      | 0      | 0      | 0      | 0      | 0      | 0      | 0      | 0      | 0      | 0      | 0      | 0      | 0      | 0      | 0      |
| Desulfarculus      | 2              | 92             | 0      | 0      | 0      | 0      | 0      | 0      | 1      | 0      | 0      | 0      | 0      | 0      | 0      | 0      | 0      | 0      | 0      |
| Desulfatibacillum  | 3              | 84             | 0      | 0      | 0      | 0      | 0      | 0      | 1      | 0      | 0      | 0      | 0      | 0      | 0      | 0      | 0      | 0      | 0      |
| Desulfitobacterium | 2              | 102            | 0      | 0      | 0      | 0      | 0      | 0      | 0      | 0      | 0      | 0      | 0      | 0      | 0      | 0      | 0      | 0      | 0      |
| Desulfobacca       | 2              | 65             | 0      | 0      | 0      | 0      | 0      | 0      | 0      | 0      | 0      | 0      | 0      | 0      | 0      | 0      | 0      | 0      | 0      |
| Desulfobacterium   | 2              | 113            | 0      | 0      | 0      | 0      | 0      | 0      | 1      | 0      | 0      | 0      | 0      | 0      | 0      | 0      | 0      | 0      | 0      |
| Desulfobacula      | 1              | 21             | 0      | 0      | 0      | 0      | 0      | 0      | 0      | 0      | 0      | 0      | 0      | 0      | 0      | 0      | 0      | 0      | 0      |
| Desulfobulbus      | 2              | 88             | 0      | 0      | 0      | 0      | 0      | 0      | 0      | 0      | 0      | 0      | 0      | 0      | 0      | 0      | 0      | 0      | 0      |
| Desulfocapsa       | 1              | 9              | 0      | 0      | 0      | 0      | 0      | 0      | 0      | 0      | 0      | 0      | 0      | 0      | 0      | 0      | 0      | 0      | 0      |
| Desulfococcus      | 2              | 80             | 0      | 0      | 0      | 0      | 0      | 0      | 0      | 0      | 0      | 0      | 0      | 0      | 0      | 0      | 0      | 0      | 0      |
| Desulfohalobium    | 2              | 52             | 0      | 0      | 0      | 0      | 0      | 0      | 0      | 0      | 0      | 0      | 0      | 0      | 0      | 0      | 0      | 0      | 0      |
| Desulfomicrobium   | 2              | 65             | 0      | 0      | 0      | 0      | 0      | 0      | 0      | 0      | 0      | 0      | 0      | 0      | 0      | 0      | 0      | 0      | 0      |
| Desulfomonile      | 1              | 25             | 0      | 0      | 0      | 0      | 0      | 0      | 1      | 0      | 0      | 0      | 0      | 0      | 0      | 0      | 0      | 0      | 0      |
| Desulforhabdus     | 1              | 2              | 0      | 0      | 0      | 0      | 0      | 0      | 0      | 0      | 0      | 0      | 0      | 0      | 0      | 0      | 0      | 0      | 0      |
| Desulfosporosinus  | 1              | 30             | 0      | 0      | 0      | 0      | 0      | 0      | 1      | 0      | 0      | 0      | 0      | 0      | 0      | 0      | 0      | 0      | 0      |
| Desulfotalea       | 2              | 66             | 0      | 0      | 0      | 0      | 0      | 0      | 0      | 0      | 0      | 0      | 0      | 0      | 0      | 0      | 0      | 0      | 0      |
| Desulfotomaculum   | 2              | 98             | 0      | 0      | 0      | 0      | 0      | 0      | 1      | 0      | 0      | 0      | 0      | 0      | 1      | 0      | 0      | 1      | 0      |
| Desulfovibrio      | 2              | 144            | 0      | 0      | 0      | 0      | 0      | 0      | 0      | 0      | 0      | 0      | 0      | 0      | 0      | 0      | 0      | 0      | 0      |
| Desulfurispirillum | 2              | 78             | 0      | 0      | 0      | 0      | 0      | 0      | 0      | 0      | 0      | 0      | 0      | 0      | 0      | 0      | 0      | 0      | 0      |
| Desulfurivibrio    | 2              | 71             | 0      | 0      | 0      | 0      | 0      | 0      | 0      | 0      | 0      | 0      | 0      | 0      | 0      | 0      | 0      | 0      | 0      |
| Desulfurobacterium | 2              | 53             | 0      | 0      | 0      | 0      | 0      | 0      | 0      | 0      | 0      | 0      | 0      | 0      | 0      | 0      | 0      | 0      | 0      |
| Desulfurococcus    | 1              | 11             | 0      | 0      | 0      | 0      | 0      | 0      | 0      | 0      | 0      | 0      | 0      | 0      | 0      | 0      | 0      | 0      | 0      |
| Diaphorobacter     | 1              | 16             | 0      | 0      | 0      | 0      | 0      | 0      | 0      | 0      | 0      | 0      | 0      | 0      | 0      | 0      | 0      | 0      | 0      |
| Dichelobacter      | 2              | 45             | 0      | 0      | 0      | 0      | 0      | 0      | 0      | 0      | 0      | 0      | 0      | 0      | 0      | 0      | 0      | 0      | 0      |
| Dickeya            | 2              | 155            | 0      | 0      | 0      | 0      | 0      | 0      | 0      | 0      | 0      | 0      | 0      | 0      | 0      | 0      | 0      | 0      | 0      |
| Dictyoglomus       | 2              | 62             | 0      | 0      | 0      | 0      | 0      | 0      | 0      | 0      | 0      | 0      | 0      | 0      | 0      | 0      | 0      | 0      | 0      |
| Dinoroseobacter    | 3              | 148            | 0      | 0      | 0      | 0      | 0      | 0      | 0      | 0      | 0      | 0      | 0      | 0      | 1      | 1      | 1      | 0      | 0      |
| Dokdonia           | 1              | 3              | 0      | 0      | 0      | 0      | 0      | 0      | 0      | 0      | 0      | 0      | 0      | 0      | 0      | 0      | 0      | 0      | 0      |
| Dorea              | 1              | 7              | 0      | 0      | 0      | 0      | 0      | 0      | 0      | 0      | 0      | 0      | 0      | 0      | 0      | 0      | 0      | 0      | 0      |
| Dyadobacter        | 2              | 83             | 0      | 0      | 0      | 0      | 0      | 0      | 0      | 0      | 0      | 0      | 0      | 0      | 0      | 0      | 0      | 0      | 0      |
| Echinicola         | 1              | 20             | 0      | 0      | 0      | 0      | 0      | 0      | 0      | 0      | 0      | 0      | 0      | 0      | 0      | 0      | 0      | 0      | 0      |
| Edwardsiella       | 2              | 126            | 0      | 0      | 0      | 0      | 0      | 0      | 0      | 0      | 0      | 0      | 0      | 0      | 0      | 0      | 0      | 0      | 0      |
| Eggerthella        | 1              | 51             | 0      | 0      | 0      | 0      | 0      | 0      | 0      | 0      | 0      | 0      | 0      | 0      | 0      | 0      | 0      | 0      | 0      |
| Ehrlichia          | 2              | 37             | 0      | 0      | 0      | 0      | 0      | 0      | 0      | 0      | 0      | 0      | 0      | 0      | 0      | 0      | 0      | 0      | 0      |
| Eikenella          | 1              | 4              | 0      | 0      | 0      | 0      | 0      | 0      | 0      | 0      | 0      | 0      | 0      | 0      | 0      | 0      | 0      | 0      | 0      |
| Elusimicrobium     | 2              | 44             | 0      | 0      | 0      | 0      | 0      | 0      | 0      | 0      | 0      | 0      | 0      | 0      | 0      | 0      | 0      | 0      | 0      |
| Emticicia          | 1              | 21             | 0      | 0      | 0      | 0      | 0      | 0      | 0      | 0      | 0      | 0      | 1      | 0      | 0      | 0      | 0      | 0      | 0      |
| Enhydrobacter      | 1              | 1              | 0      | 0      | 0      | 0      | 0      | 0      | 0      | 0      | 0      | 0      | 0      | 0      | 0      | 0      | 0      | 0      | 0      |
| Ensifer            | 1              | 2              | 0      | 0      | 0      | 0      | 0      | 0      | 0      | 0      | 0      | 0      | 0      | 0      | 0      | 0      | 0      | 0      | 0      |
| Enterobacter       | 2              | 202            | 0      | 0      | 0      | 0      | 0      | 0      | 0      | 0      | 0      | 0      | 0      | 0      | 0      | 0      | 0      | 0      | 0      |
| Enterobacteriaceae | 2              | 211            | 0      | 0      | 0      | 0      | 0      | 0      | 0      | 0      | 0      | 0      | 1      | 0      | 0      | 0      | 0      | 0      | 0      |
| Enterococcus       | 1              | 187            | 0      | 0      | 0      | 0      | 0      | 0      | 0      | 0      | 0      | 0      | 1      | 0      | 0      | 0      | 0      | 0      | 0      |



| Genus               | Cluster Number | Protein Counts | K15982 | K16045 | K16047 | K16049 | K16050 | K16051 | K16173 | K16249 | K16269 | K16270 | K16514 | K16873 | K16874 | K16876 | K16880 | K17067 | K17070 |
|---------------------|----------------|----------------|--------|--------|--------|--------|--------|--------|--------|--------|--------|--------|--------|--------|--------|--------|--------|--------|--------|
| Enterovibrio        | 1              | 15             | 0      | 0      | 0      | 0      | 0      | 0      | 0      | 0      | 0      | 0      | 0      | 0      | 0      | 0      | 0      | 0      | 0      |
| Erwinia             | 2              | 151            | 0      | 0      | 0      | 0      | 0      | 0      | 0      | 0      | 0      | 0      | 1      | 0      | 0      | 0      | 0      | 0      | 0      |
| Erysipelothrix      | 1              | 9              | 0      | 0      | 0      | 0      | 0      | 0      | 0      | 0      | 0      | 0      | 0      | 0      | 0      | 0      | 0      | 0      | 0      |
| Erysipelotrichaceae | 1              | 4              | 0      | 0      | 0      | 0      | 0      | 0      | 0      | 0      | 0      | 0      | 0      | 0      | 0      | 0      | 0      | 0      | 0      |
| Erythrobacter       | 2              | 80             | 0      | 0      | 0      | 0      | 0      | 0      | 0      | 0      | 0      | 0      | 0      | 0      | 0      | 0      | 0      | 0      | 0      |
| Escherichia         | 2              | 242            | 0      | 0      | 0      | 0      | 0      | 0      | 0      | 0      | 0      | 0      | 1      | 0      | 0      | 0      | 0      | 0      | 0      |
| Ethanoligenens      | 2              | 69             | 0      | 0      | 0      | 0      | 0      | 0      | 0      | 0      | 0      | 0      | 0      | 0      | 0      | 0      | 0      | 0      | 0      |
| Eubacteriaceae      | 1              | 2              | 0      | 0      | 0      | 0      | 0      | 0      | 0      | 0      | 0      | 0      | 0      | 0      | 0      | 0      | 0      | 0      | 0      |
| Eubacterium         | 2              | 103            | 0      | 0      | 0      | 0      | 0      | 0      | 0      | 0      | 0      | 0      | 0      | 0      | 0      | 0      | 0      | 0      | 0      |
| Eudoraea            | 1              | 4              | 0      | 0      | 0      | 0      | 0      | 0      | 0      | 0      | 0      | 0      | 0      | 0      | 0      | 0      | 0      | 0      | 0      |
| Euryarchaeota       | 1              | 1              | 0      | 0      | 0      | 0      | 0      | 0      | 0      | 0      | 0      | 0      | 0      | 0      | 0      | 0      | 0      | 0      | 0      |
| Exiguobacterium     | 2              | 93             | 0      | 0      | 0      | 0      | 0      | 0      | 0      | 0      | 0      | 0      | 0      | 0      | 0      | 0      | 0      | 0      | 0      |
| Faecalibacterium    | 1              | 12             | 0      | 0      | 0      | 0      | 0      | 0      | 0      | 0      | 0      | 0      | 0      | 0      | 0      | 0      | 0      | 0      | 0      |
| Ferrimonas          | 2              | 115            | 0      | 0      | 0      | 0      | 0      | 0      | 0      | 0      | 0      | 0      | 0      | 0      | 0      | 0      | 0      | 0      | 0      |
| Ferroglobus         | 1              | 14             | 0      | 0      | 0      | 0      | 0      | 0      | 0      | 0      | 0      | 0      | 0      | 0      | 0      | 0      | 0      | 0      | 0      |
| Ferroplasma         | 1              | 11             | 0      | 0      | 0      | 0      | 0      | 0      | 0      | 0      | 0      | 0      | 0      | 0      | 0      | 0      | 0      | 0      | 0      |
| Fervidicoccus       | 1              | 7              | 0      | 0      | 0      | 0      | 0      | 0      | 0      | 0      | 0      | 0      | 0      | 0      | 0      | 0      | 0      | 0      | 0      |
| Fervidobacterium    | 2              | 54             | 0      | 0      | 0      | 0      | 0      | 0      | 0      | 0      | 0      | 0      | 0      | 0      | 0      | 0      | 0      | 0      | 0      |
| Fibrella            | 1              | 17             | 0      | 0      | 0      | 0      | 0      | 0      | 0      | 0      | 0      | 0      | 0      | 0      | 0      | 0      | 0      | 0      | 0      |
| Fibroacter          | 2              | 52             | 0      | 0      | 0      | 0      | 0      | 0      | 0      | 0      | 0      | 0      | 0      | 0      | 0      | 0      | 0      | 0      | 0      |
| Filifactor          | 1              | 9              | 0      | 0      | 0      | 0      | 0      | 0      | 0      | 0      | 0      | 0      | 0      | 0      | 0      | 0      | 0      | 0      | 0      |
| Finegoldia          | 2              | 55             | 0      | 0      | 0      | 0      | 0      | 0      | 0      | 0      | 0      | 0      | 0      | 0      | 0      | 0      | 0      | 0      | 0      |
| Firmicutes          | 1              | 15             | 0      | 0      | 0      | 0      | 0      | 0      | 0      | 0      | 0      | 0      | 0      | 0      | 0      | 0      | 0      | 0      | 0      |
| Fischerella         | 1              | 15             | 0      | 0      | 0      | 0      | 0      | 0      | 0      | 0      | 0      | 0      | 0      | 0      | 0      | 0      | 0      | 0      | 0      |
| Flavobacteria       | 1              | 7              | 0      | 0      | 0      | 0      | 0      | 0      | 0      | 0      | 0      | 0      | 0      | 0      | 0      | 0      | 0      | 0      | 0      |
| Flavobacteriaceae   | 2              | 69             | 0      | 0      | 0      | 0      | 0      | 0      | 0      | 0      | 0      | 0      | 0      | 0      | 0      | 0      | 0      | 0      | 0      |
| Flavobacteriales    | 1              | 3              | 0      | 0      | 0      | 0      | 0      | 0      | 0      | 0      | 0      | 0      | 0      | 0      | 0      | 0      | 0      | 0      | 0      |
| Flavobacterium      | 2              | 103            | 0      | 0      | 0      | 0      | 0      | 0      | 0      | 0      | 0      | 0      | 0      | 0      | 0      | 0      | 0      | 0      | 0      |
| Flexibacter         | 1              | 17             | 0      | 0      | 0      | 0      | 0      | 0      | 0      | 0      | 0      | 0      | 0      | 0      | 0      | 0      | 0      | 0      | 0      |
| Flexistipes         | 1              | 11             | 0      | 0      | 0      | 0      | 0      | 0      | 0      | 0      | 0      | 0      | 0      | 0      | 0      | 0      | 0      | 0      | 0      |
| Fluoribacter        | 1              | 6              | 0      | 0      | 0      | 0      | 0      | 0      | 0      | 0      | 0      | 0      | 0      | 0      | 0      | 0      | 0      | 0      | 0      |
| Fluviicola          | 2              | 69             | 0      | 0      | 0      | 0      | 0      | 0      | 0      | 0      | 0      | 0      | 0      | 0      | 0      | 0      | 0      | 0      | 0      |
| Formosa             | 1              | 2              | 0      | 0      | 0      | 0      | 0      | 0      | 0      | 0      | 0      | 0      | 0      | 0      | 0      | 0      | 0      | 0      | 0      |
| Francisella         | 2              | 88             | 0      | 0      | 0      | 0      | 0      | 0      | 0      | 0      | 0      | 0      | 0      | 0      | 0      | 0      | 0      | 0      | 0      |
| Frankia             | 3              | 202            | 0      | 0      | 0      | 0      | 0      | 1      | 0      | 0      | 0      | 0      | 0      | 0      | 0      | 0      | 0      | 0      | 0      |
| Frateuria           | 1              | 25             | 0      | 0      | 0      | 0      | 0      | 0      | 0      | 0      | 0      | 0      | 0      | 0      | 0      | 0      | 0      | 0      | 0      |
| Fructobacillus      | 1              | 2              | 0      | 0      | 0      | 0      | 0      | 0      | 0      | 0      | 0      | 0      | 0      | 0      | 0      | 0      | 0      | 0      | 0      |
| Fulvimarina         | 1              | 2              | 0      | 0      | 0      | 0      | 0      | 0      | 0      | 0      | 0      | 0      | 0      | 0      | 0      | 0      | 0      | 0      | 0      |
| Fusobacterium       | 1              | 48             | 0      | 0      | 0      | 0      | 0      | 0      | 0      | 0      | 0      | 0      | 0      | 0      | 0      | 0      | 0      | 0      | 0      |
| Gallibacterium      | 2              | 87             | 0      | 0      | 0      | 0      | 0      | 0      | 0      | 0      | 0      | 0      | 0      | 0      | 0      | 0      | 0      | 0      | 0      |
| Gallionella         | 2              | 67             | 0      | 0      | 0      | 0      | 0      | 0      | 0      | 0      | 0      | 0      | 0      | 0      | 0      | 0      | 0      | 0      | 0      |
| Gammaproteobacteria | 1              | 9              | 0      | 0      | 0      | 0      | 0      | 0      | 0      | 0      | 0      | 0      | 0      | 0      | 0      | 0      | 0      | 0      | 0      |
| Gardnerella         | 1              | 31             | 0      | 0      | 0      | 0      | 0      | 0      | 0      | 0      | 0      | 0      | 0      | 0      | 0      | 0      | 0      | 0      | 0      |
| Geitlerinema        | 1              | 9              | 0      | 0      | 0      | 0      | 0      | 0      | 0      | 0      | 0      | 0      | 0      | 0      | 0      | 0      | 0      | 0      | 0      |
| Gemmatimonas        | 2              | 93             | 0      | 0      | 0      | 0      | 0      | 0      | 0      | 0      | 0      | 0      | 0      | 0      | 0      | 0      | 0      | 0      | 0      |
| Geobacillus         | 2              | 168            | 0      | 0      | 0      | 0      | 0      | 0      | 1      | 0      | 0      | 0      | 0      | 0      | 1      | 1      | 1      | 0      | 0      |
| Geobacter           | 2              | 150            | 0      | 0      | 0      | 0      | 0      | 0      | 1      | 0      | 0      | 0      | 0      | 0      | 0      | 0      | 0      | 1      | 0      |
| Geodermatophilus    | 2              | 136            | 0      | 0      | 0      | 0      | 0      | 0      | 0      | 0      | 0      | 0      | 0      | 0      | 0      | 0      | 0      | 0      | 0      |
| Geopsychrobacter    | 1              | 2              | 0      | 0      | 0      | 0      | 0      | 0      | 0      | 0      | 0      | 0      | 0      | 0      | 0      | 0      | 0      | 1      | 0      |
| Gillisia            | 1              | 11             | 0      | 0      | 0      | 0      | 0      | 0      | 0      | 0      | 0      | 0      | 0      | 0      | 0      | 0      | 0      | 0      | 0      |
| Gilvimarinus        | 1              | 4              | 0      | 0      | 0      | 0      | 0      | 0      | 0      | 0      | 0      | 0      | 0      | 0      | 0      | 0      | 0      | 0      | 0      |
| Glaciecola          | 2              | 117            | 0      | 0      | 0      | 0      | 0      | 0      | 0      | 0      | 0      | 0      | 0      | 0      | 0      | 0      | 0      | 0      | 0      |

| Genus             | Cluster Number | Protein Counts | K15982 | K16045 | K16047 | K16049 | K16050 | K16051 | K16173 | K16249 | K16269 | K16270 | K16514 | K16873 | K16874 | K16876 | K16880 | K17067 | K17070 |
|-------------------|----------------|----------------|--------|--------|--------|--------|--------|--------|--------|--------|--------|--------|--------|--------|--------|--------|--------|--------|--------|
| Gloeobacter       | 2              | 67             | 0      | 0      | 0      | 0      | 0      | 0      | 0      | 0      | 0      | 0      | 0      | 0      | 0      | 0      | 0      | 0      | 0      |
| Gloeocapsa        | 1              | 20             | 0      | 0      | 0      | 0      | 0      | 0      | 0      | 0      | 0      | 0      | 0      | 0      | 0      | 0      | 0      | 0      | 0      |
| Gloeotheca        | 1              | 1              | 0      | 0      | 0      | 0      | 0      | 0      | 0      | 0      | 0      | 0      | 0      | 0      | 0      | 0      | 0      | 0      | 0      |
| Gluconacetobacter | 2              | 96             | 0      | 0      | 0      | 0      | 0      | 0      | 0      | 0      | 0      | 0      | 0      | 0      | 0      | 0      | 0      | 0      | 0      |
| Gluconobacter     | 2              | 76             | 0      | 0      | 0      | 0      | 0      | 0      | 0      | 0      | 0      | 0      | 0      | 0      | 0      | 0      | 0      | 0      | 0      |
| Gordonia          | 1              | 158            | 1      | 0      | 1      | 1      | 0      | 0      | 0      | 0      | 0      | 0      | 0      | 0      | 0      | 0      | 0      | 1      | 0      |
| Gordonibacter     | 1              | 32             | 0      | 0      | 0      | 0      | 0      | 0      | 0      | 0      | 0      | 0      | 0      | 0      | 0      | 0      | 0      | 0      | 0      |
| Gramella          | 2              | 104            | 0      | 0      | 0      | 0      | 0      | 0      | 0      | 0      | 0      | 0      | 0      | 0      | 0      | 0      | 0      | 0      | 0      |
| Granulibacter     | 2              | 90             | 0      | 0      | 0      | 0      | 0      | 0      | 0      | 0      | 0      | 0      | 0      | 0      | 0      | 0      | 0      | 0      | 0      |
| Granulicella      | 2              | 98             | 0      | 0      | 0      | 0      | 0      | 0      | 0      | 0      | 0      | 0      | 0      | 0      | 0      | 0      | 0      | 0      | 0      |
| Grimontia         | 1              | 9              | 0      | 0      | 0      | 0      | 0      | 0      | 0      | 0      | 0      | 0      | 0      | 0      | 0      | 0      | 0      | 0      | 0      |
| Haemophilus       | 2              | 117            | 0      | 0      | 0      | 0      | 0      | 0      | 0      | 0      | 0      | 0      | 0      | 0      | 0      | 0      | 0      | 0      | 0      |
| Hafnia            | 1              | 29             | 0      | 0      | 0      | 0      | 0      | 0      | 0      | 0      | 0      | 0      | 0      | 0      | 0      | 0      | 0      | 0      | 0      |
| Hahella           | 3              | 130            | 0      | 0      | 0      | 0      | 0      | 0      | 0      | 0      | 0      | 0      | 0      | 0      | 0      | 0      | 0      | 0      | 0      |
| Halalkalicoccus   | 1              | 18             | 0      | 0      | 0      | 0      | 0      | 0      | 0      | 0      | 0      | 0      | 0      | 0      | 0      | 0      | 0      | 0      | 0      |
| Halanaerobium     | 2              | 89             | 0      | 0      | 0      | 0      | 0      | 0      | 0      | 0      | 0      | 0      | 0      | 0      | 0      | 0      | 0      | 0      | 0      |
| Haliangium        | 2              | 108            | 0      | 0      | 0      | 0      | 0      | 0      | 0      | 0      | 0      | 0      | 0      | 0      | 0      | 0      | 0      | 0      | 0      |
| Haliscomenobacter | 2              | 107            | 0      | 0      | 0      | 0      | 0      | 0      | 0      | 0      | 0      | 0      | 0      | 0      | 0      | 0      | 0      | 0      | 0      |
| Haloarcula        | 1              | 22             | 0      | 0      | 0      | 0      | 0      | 0      | 0      | 0      | 0      | 0      | 0      | 0      | 0      | 0      | 0      | 0      | 0      |
| Halobacillus      | 1              | 19             | 0      | 0      | 0      | 0      | 0      | 0      | 0      | 0      | 0      | 0      | 0      | 0      | 0      | 0      | 0      | 0      | 0      |
| Halobacteriaceae  | 1              | 1              | 0      | 0      | 0      | 0      | 0      | 0      | 0      | 0      | 0      | 0      | 0      | 0      | 0      | 0      | 0      | 0      | 0      |
| Halobacterium     | 1              | 10             | 0      | 0      | 0      | 0      | 0      | 0      | 0      | 0      | 0      | 0      | 0      | 0      | 0      | 0      | 0      | 0      | 0      |
| Halobacteroides   | 1              | 14             | 0      | 0      | 0      | 0      | 0      | 0      | 0      | 0      | 0      | 0      | 0      | 0      | 0      | 0      | 0      | 0      | 0      |
| Haloferax         | 1              | 20             | 0      | 0      | 0      | 0      | 0      | 0      | 0      | 0      | 0      | 0      | 0      | 0      | 0      | 0      | 0      | 0      | 0      |
| Halogeometricum   | 1              | 12             | 0      | 0      | 0      | 0      | 0      | 0      | 0      | 0      | 0      | 0      | 0      | 0      | 0      | 0      | 0      | 0      | 0      |
| Halomicrobium     | 1              | 10             | 0      | 0      | 0      | 0      | 0      | 0      | 0      | 0      | 0      | 0      | 0      | 0      | 0      | 0      | 0      | 0      | 0      |
| Halomonas         | 1              | 149            | 0      | 0      | 0      | 0      | 0      | 0      | 0      | 0      | 0      | 0      | 0      | 0      | 0      | 0      | 0      | 0      | 0      |
| Halopiger         | 1              | 16             | 0      | 0      | 0      | 0      | 0      | 0      | 0      | 0      | 0      | 0      | 0      | 0      | 0      | 0      | 0      | 0      | 0      |
| Haloquadratum     | 1              | 19             | 0      | 0      | 0      | 0      | 0      | 0      | 0      | 0      | 0      | 0      | 0      | 0      | 0      | 0      | 0      | 0      | 0      |
| Halorhabdus       | 1              | 10             | 0      | 0      | 0      | 0      | 0      | 0      | 0      | 0      | 0      | 0      | 0      | 0      | 0      | 0      | 0      | 0      | 0      |
| Halorhodospira    | 2              | 71             | 0      | 0      | 0      | 0      | 0      | 0      | 0      | 0      | 0      | 0      | 0      | 0      | 0      | 0      | 0      | 0      | 0      |
| Halorubrum        | 1              | 16             | 0      | 0      | 0      | 0      | 0      | 0      | 0      | 0      | 0      | 0      | 0      | 0      | 0      | 0      | 0      | 0      | 0      |
| Haloterrigena     | 1              | 19             | 0      | 0      | 0      | 0      | 0      | 0      | 0      | 0      | 0      | 0      | 0      | 0      | 0      | 0      | 0      | 0      | 0      |
| Halothece         | 1              | 9              | 0      | 0      | 0      | 0      | 0      | 0      | 0      | 0      | 0      | 0      | 0      | 0      | 0      | 0      | 0      | 0      | 0      |
| Halothermothrix   | 2              | 50             | 0      | 0      | 0      | 0      | 0      | 0      | 0      | 0      | 0      | 0      | 0      | 0      | 0      | 0      | 0      | 0      | 0      |
| Halothiobacillus  | 2              | 65             | 0      | 0      | 0      | 0      | 0      | 0      | 0      | 0      | 0      | 0      | 0      | 0      | 0      | 0      | 0      | 0      | 0      |
| Halovivax         | 1              | 12             | 0      | 0      | 0      | 0      | 0      | 0      | 0      | 0      | 0      | 0      | 0      | 0      | 0      | 0      | 0      | 0      | 0      |
| Helicobacter      | 2              | 79             | 0      | 0      | 0      | 0      | 0      | 0      | 0      | 0      | 0      | 0      | 0      | 0      | 0      | 0      | 0      | 0      | 0      |
| Heliobacillus     | 1              | 4              | 0      | 0      | 0      | 0      | 0      | 0      | 0      | 0      | 0      | 0      | 0      | 0      | 0      | 0      | 0      | 0      | 0      |
| Heliobacterium    | 2              | 51             | 0      | 0      | 0      | 0      | 0      | 0      | 0      | 0      | 0      | 0      | 0      | 0      | 0      | 0      | 0      | 0      | 0      |
| Herbaspirillum    | 2              | 172            | 0      | 0      | 0      | 0      | 0      | 0      | 0      | 0      | 0      | 0      | 0      | 0      | 0      | 0      | 0      | 0      | 0      |
| Herminiimonas     | 3              | 89             | 0      | 0      | 0      | 0      | 0      | 0      | 0      | 0      | 0      | 0      | 0      | 0      | 0      | 0      | 0      | 0      | 0      |
| Herpetosiphon     | 3              | 90             | 0      | 0      | 0      | 0      | 0      | 0      | 0      | 0      | 0      | 0      | 0      | 0      | 0      | 0      | 0      | 0      | 0      |
| Hippea            | 2              | 44             | 0      | 0      | 0      | 0      | 0      | 0      | 0      | 0      | 0      | 0      | 0      | 0      | 0      | 0      | 0      | 0      | 0      |
| Hirschia          | 2              | 102            | 0      | 0      | 0      | 0      | 0      | 0      | 0      | 0      | 0      | 0      | 0      | 0      | 0      | 0      | 0      | 0      | 0      |
| Histophilus       | 2              | 72             | 0      | 0      | 0      | 0      | 0      | 0      | 0      | 0      | 0      | 0      | 0      | 0      | 0      | 0      | 0      | 0      | 0      |
| Hoeflea           | 1              | 16             | 0      | 0      | 0      | 0      | 0      | 0      | 0      | 0      | 0      | 0      | 0      | 0      | 0      | 0      | 0      | 0      | 0      |
| Hydrogenivirga    | 1              | 2              | 0      | 0      | 0      | 0      | 0      | 0      | 0      | 0      | 0      | 0      | 0      | 0      | 0      | 0      | 0      | 0      | 0      |
| Hydrogenobacter   | 2              | 55             | 0      | 0      | 0      | 0      | 0      | 0      | 0      | 0      | 0      | 0      | 0      | 0      | 0      | 0      | 0      | 0      | 0      |
| Hydrogenobaculum  | 2              | 44             | 0      | 0      | 0      | 0      | 0      | 0      | 0      | 0      | 0      | 0      | 0      | 0      | 0      | 0      | 0      | 0      | 0      |
| Hydrogenophaga    | 1              | 9              | 0      | 0      | 0      | 0      | 0      | 0      | 0      | 0      | 0      | 0      | 0      | 0      | 0      | 0      | 0      | 0      | 0      |
| Hylemonella       | 1              | 4              | 0      | 0      | 0      | 0      | 0      | 0      | 0      | 0      | 0      | 0      | 0      | 0      | 0      | 0      | 0      | 0      | 0      |

| Genus                 | Cluster Number | Protein Counts | K15982 | K16045 | K16047 | K16049 | K16050 | K16051 | K16173 | K16249 | K16269 | K16270 | K16514 | K16873 | K16874 | K16876 | K16880 | K17067 | K17070 |
|-----------------------|----------------|----------------|--------|--------|--------|--------|--------|--------|--------|--------|--------|--------|--------|--------|--------|--------|--------|--------|--------|
| Hyperthermus          | 1              | 6              | 0      | 0      | 0      | 0      | 0      | 0      | 0      | 0      | 0      | 0      | 0      | 0      | 0      | 0      | 0      | 0      | 0      |
| Hyphomicrobium        | 2              | 93             | 0      | 0      | 0      | 0      | 0      | 0      | 0      | 0      | 0      | 0      | 0      | 0      | 0      | 0      | 0      | 0      | 1      |
| Hyphomonas            | 3              | 105            | 0      | 0      | 0      | 0      | 0      | 0      | 0      | 0      | 0      | 0      | 0      | 0      | 0      | 0      | 0      | 0      | 0      |
| Ideonella             | 1              | 18             | 0      | 0      | 0      | 0      | 0      | 0      | 0      | 0      | 0      | 0      | 0      | 0      | 0      | 0      | 0      | 0      | 0      |
| Idiomarina            | 2              | 86             | 0      | 0      | 0      | 0      | 0      | 0      | 0      | 0      | 0      | 0      | 0      | 0      | 0      | 0      | 0      | 0      | 0      |
| Ignavibacterium       | 1              | 14             | 0      | 0      | 0      | 0      | 0      | 0      | 0      | 0      | 0      | 0      | 0      | 0      | 0      | 0      | 0      | 0      | 0      |
| Ignicoccus            | 1              | 5              | 0      | 0      | 0      | 0      | 0      | 0      | 0      | 0      | 0      | 0      | 0      | 0      | 0      | 0      | 0      | 0      | 0      |
| Ignisphaera           | 1              | 8              | 0      | 0      | 0      | 0      | 0      | 0      | 0      | 0      | 0      | 0      | 0      | 0      | 0      | 0      | 0      | 0      | 0      |
| Ilyobacter            | 2              | 85             | 0      | 0      | 0      | 0      | 0      | 0      | 0      | 0      | 0      | 0      | 0      | 0      | 0      | 0      | 0      | 0      | 0      |
| Intrasporangium       | 2              | 114            | 0      | 0      | 0      | 0      | 0      | 0      | 0      | 0      | 0      | 0      | 0      | 0      | 0      | 0      | 0      | 0      | 0      |
| Isoptericola          | 1              | 18             | 0      | 0      | 0      | 0      | 0      | 0      | 0      | 0      | 0      | 0      | 0      | 0      | 0      | 0      | 0      | 0      | 0      |
| Isosphaera            | 2              | 75             | 0      | 0      | 0      | 0      | 0      | 0      | 0      | 0      | 0      | 0      | 0      | 0      | 0      | 0      | 0      | 0      | 0      |
| Jannaschia            | 3              | 151            | 0      | 0      | 0      | 0      | 0      | 0      | 0      | 0      | 0      | 0      | 0      | 0      | 0      | 0      | 0      | 0      | 0      |
| Janthinobacterium     | 2              | 99             | 0      | 0      | 0      | 0      | 0      | 0      | 0      | 0      | 0      | 0      | 0      | 0      | 0      | 0      | 0      | 0      | 0      |
| Jonesia               | 2              | 56             | 0      | 0      | 0      | 0      | 0      | 0      | 0      | 0      | 0      | 0      | 0      | 0      | 0      | 0      | 0      | 0      | 0      |
| Joostella             | 1              | 3              | 0      | 0      | 0      | 0      | 0      | 0      | 0      | 0      | 0      | 0      | 0      | 0      | 0      | 0      | 0      | 0      | 0      |
| Kaistia               | 1              | 2              | 0      | 0      | 0      | 0      | 0      | 0      | 0      | 0      | 0      | 0      | 0      | 0      | 0      | 0      | 0      | 0      | 0      |
| Kangiella             | 2              | 84             | 0      | 0      | 0      | 0      | 0      | 0      | 0      | 0      | 0      | 0      | 0      | 0      | 0      | 0      | 0      | 0      | 0      |
| Ketogulonicigenium    | 2              | 102            | 0      | 0      | 0      | 0      | 0      | 0      | 0      | 0      | 0      | 0      | 0      | 0      | 0      | 0      | 0      | 0      | 0      |
| Kineococcus           | 1              | 24             | 0      | 0      | 0      | 0      | 0      | 0      | 0      | 0      | 0      | 0      | 0      | 0      | 0      | 0      | 0      | 0      | 0      |
| Kinetoplastibacterium | 1              | 2              | 0      | 0      | 0      | 0      | 0      | 0      | 0      | 0      | 0      | 0      | 0      | 0      | 0      | 0      | 0      | 0      | 0      |
| Kingella              | 1              | 4              | 0      | 0      | 0      | 0      | 0      | 0      | 0      | 0      | 0      | 0      | 0      | 0      | 0      | 0      | 0      | 0      | 0      |
| Kitasatospora         | 1              | 36             | 0      | 0      | 0      | 0      | 0      | 0      | 0      | 0      | 0      | 0      | 0      | 0      | 0      | 0      | 0      | 0      | 0      |
| Klebsiella            | 3              | 222            | 0      | 0      | 0      | 0      | 0      | 0      | 0      | 0      | 0      | 0      | 1      | 0      | 0      | 0      | 0      | 0      | 0      |
| Kluyvera              | 1              | 1              | 0      | 0      | 0      | 0      | 0      | 0      | 0      | 0      | 0      | 0      | 0      | 0      | 0      | 0      | 0      | 0      | 0      |
| Kocuria               | 2              | 87             | 0      | 0      | 0      | 0      | 0      | 0      | 0      | 0      | 0      | 0      | 0      | 0      | 0      | 0      | 0      | 0      | 0      |
| Kordia                | 1              | 5              | 0      | 0      | 0      | 0      | 0      | 0      | 0      | 0      | 0      | 0      | 0      | 0      | 0      | 0      | 0      | 0      | 0      |
| Kosmotoga             | 2              | 61             | 0      | 0      | 0      | 0      | 0      | 0      | 0      | 0      | 0      | 0      | 0      | 0      | 0      | 0      | 0      | 0      | 0      |
| Kribbella             | 2              | 99             | 0      | 0      | 0      | 0      | 0      | 0      | 0      | 0      | 0      | 0      | 0      | 0      | 0      | 0      | 0      | 0      | 0      |
| Krokinobacter         | 2              | 90             | 0      | 0      | 0      | 0      | 0      | 0      | 0      | 0      | 0      | 0      | 0      | 0      | 0      | 0      | 0      | 0      | 0      |
| Kyrpidia              | 2              | 113            | 0      | 0      | 0      | 0      | 0      | 0      | 0      | 0      | 0      | 0      | 0      | 0      | 0      | 0      | 0      | 0      | 0      |
| Kytococcus            | 2              | 70             | 0      | 0      | 0      | 0      | 0      | 0      | 0      | 0      | 0      | 0      | 0      | 0      | 0      | 0      | 0      | 0      | 0      |
| Labrenzia             | 1              | 4              | 0      | 0      | 0      | 0      | 0      | 0      | 0      | 0      | 0      | 0      | 0      | 0      | 0      | 0      | 0      | 0      | 0      |
| Lachnoanaerobaculum   | 1              | 1              | 0      | 0      | 0      | 0      | 0      | 0      | 0      | 0      | 0      | 0      | 0      | 0      | 0      | 0      | 0      | 0      | 0      |
| Lachnospiraceae       | 1              | 51             | 0      | 0      | 0      | 0      | 0      | 0      | 0      | 0      | 0      | 0      | 0      | 0      | 0      | 0      | 0      | 0      | 0      |
| Lacinutrix            | 1              | 20             | 0      | 0      | 0      | 0      | 0      | 0      | 0      | 0      | 0      | 0      | 0      | 0      | 0      | 0      | 0      | 0      | 0      |
| Lactobacillus         | 2              | 119            | 0      | 0      | 0      | 0      | 0      | 0      | 0      | 0      | 0      | 0      | 0      | 0      | 0      | 0      | 0      | 0      | 0      |
| Lactococcus           | 2              | 82             | 0      | 0      | 0      | 0      | 0      | 0      | 0      | 0      | 0      | 0      | 0      | 0      | 0      | 0      | 0      | 0      | 0      |
| Lamprocystis          | 1              | 2              | 0      | 0      | 0      | 0      | 0      | 0      | 0      | 0      | 0      | 0      | 0      | 0      | 0      | 0      | 0      | 0      | 0      |
| Laribacter            | 2              | 80             | 0      | 0      | 0      | 0      | 0      | 0      | 0      | 0      | 0      | 0      | 0      | 0      | 0      | 0      | 0      | 0      | 0      |
| Lawsonia              | 2              | 33             | 0      | 0      | 0      | 0      | 0      | 0      | 0      | 0      | 0      | 0      | 0      | 0      | 0      | 0      | 0      | 0      | 0      |
| Leadbetterella        | 2              | 79             | 0      | 0      | 0      | 0      | 0      | 0      | 0      | 0      | 0      | 0      | 0      | 0      | 0      | 0      | 0      | 0      | 0      |
| Leeuwenhoekiiella     | 1              | 2              | 0      | 0      | 0      | 0      | 0      | 0      | 0      | 0      | 0      | 0      | 0      | 0      | 0      | 0      | 0      | 0      | 0      |
| Legionella            | 2              | 117            | 0      | 0      | 0      | 0      | 0      | 0      | 0      | 0      | 0      | 0      | 0      | 0      | 0      | 0      | 0      | 0      | 0      |
| Leifsonia             | 2              | 48             | 0      | 0      | 0      | 0      | 0      | 0      | 0      | 0      | 0      | 0      | 0      | 0      | 0      | 0      | 0      | 0      | 0      |
| Leptolyngbya          | 1              | 10             | 0      | 0      | 0      | 0      | 0      | 0      | 0      | 0      | 0      | 0      | 0      | 0      | 0      | 0      | 0      | 0      | 0      |
| Leptospira            | 2              | 76             | 0      | 0      | 0      | 0      | 0      | 0      | 0      | 0      | 0      | 0      | 0      | 0      | 0      | 0      | 0      | 0      | 0      |
| Leptospirillum        | 1              | 10             | 0      | 0      | 0      | 0      | 0      | 0      | 0      | 0      | 0      | 0      | 0      | 0      | 0      | 0      | 0      | 0      | 0      |
| Leptothrix            | 3              | 186            | 0      | 0      | 0      | 0      | 0      | 0      | 0      | 1      | 0      | 0      | 0      | 0      | 0      | 0      | 0      | 0      | 0      |
| Leptotrichia          | 2              | 43             | 0      | 0      | 0      | 0      | 0      | 0      | 0      | 0      | 0      | 0      | 0      | 0      | 0      | 0      | 0      | 0      | 0      |
| Leucobacter           | 1              | 2              | 0      | 0      | 0      | 0      | 0      | 0      | 0      | 0      | 0      | 0      | 0      | 0      | 0      | 0      | 0      | 0      | 0      |
| Leuconostoc           | 2              | 64             | 0      | 0      | 0      | 0      | 0      | 0      | 0      | 0      | 0      | 0      | 0      | 0      | 0      | 0      | 0      | 0      | 0      |

| Genus                | Cluster Number | Protein Counts | K15982 | K16045 | K16047 | K16049 | K16050 | K16051 | K16173 | K16249 | K16269 | K16270 | K16514 | K16873 | K16874 | K16876 | K16880 | K17067 | K17070 |
|----------------------|----------------|----------------|--------|--------|--------|--------|--------|--------|--------|--------|--------|--------|--------|--------|--------|--------|--------|--------|--------|
| Liberibacter         | 1              | 4              | 0      | 0      | 0      | 0      | 0      | 0      | 0      | 0      | 0      | 0      | 0      | 0      | 0      | 0      | 0      | 0      | 0      |
| Limnohabitans        | 1              | 11             | 0      | 0      | 0      | 0      | 0      | 0      | 0      | 0      | 0      | 0      | 0      | 0      | 0      | 0      | 0      | 0      | 0      |
| Listeria             | 2              | 77             | 0      | 0      | 0      | 0      | 0      | 0      | 0      | 0      | 0      | 0      | 0      | 0      | 0      | 0      | 0      | 0      | 0      |
| Listeriaceae         | 1              | 6              | 0      | 0      | 0      | 0      | 0      | 0      | 0      | 0      | 0      | 0      | 0      | 0      | 0      | 0      | 0      | 0      | 0      |
| Listonella           | 1              | 38             | 0      | 0      | 0      | 0      | 0      | 0      | 0      | 0      | 0      | 0      | 0      | 0      | 0      | 0      | 0      | 0      | 0      |
| Loktanella           | 1              | 3              | 0      | 0      | 0      | 0      | 0      | 0      | 0      | 0      | 0      | 0      | 0      | 0      | 0      | 0      | 0      | 0      | 0      |
| Lysinibacillus       | 2              | 97             | 0      | 0      | 0      | 0      | 0      | 0      | 0      | 0      | 0      | 0      | 0      | 0      | 0      | 0      | 0      | 0      | 0      |
| Macrococcus          | 2              | 60             | 0      | 0      | 0      | 0      | 0      | 0      | 0      | 0      | 0      | 0      | 0      | 0      | 0      | 0      | 0      | 0      | 0      |
| Magnetococcus        | 2              | 64             | 0      | 0      | 0      | 0      | 0      | 0      | 0      | 0      | 0      | 0      | 0      | 0      | 0      | 0      | 0      | 0      | 0      |
| Magnetospirillum     | 2              | 113            | 0      | 0      | 0      | 0      | 0      | 0      | 0      | 0      | 0      | 0      | 1      | 0      | 0      | 0      | 0      | 0      | 0      |
| Mahella              | 2              | 58             | 0      | 0      | 0      | 0      | 0      | 0      | 0      | 0      | 0      | 0      | 0      | 0      | 0      | 0      | 0      | 0      | 0      |
| Mannheimia           | 2              | 85             | 0      | 0      | 0      | 0      | 0      | 0      | 0      | 0      | 0      | 0      | 0      | 0      | 0      | 0      | 0      | 0      | 0      |
| Maribacter           | 3              | 87             | 0      | 0      | 0      | 0      | 0      | 0      | 0      | 0      | 0      | 0      | 0      | 0      | 0      | 0      | 0      | 0      | 0      |
| Maricaulis           | 3              | 87             | 0      | 0      | 0      | 0      | 0      | 0      | 0      | 0      | 0      | 0      | 0      | 0      | 0      | 0      | 0      | 0      | 0      |
| Marichromatium       | 1              | 2              | 0      | 0      | 0      | 0      | 0      | 0      | 0      | 0      | 0      | 0      | 0      | 0      | 0      | 0      | 0      | 0      | 0      |
| Marinithermus        | 2              | 77             | 0      | 0      | 0      | 0      | 0      | 0      | 0      | 0      | 0      | 0      | 0      | 0      | 0      | 0      | 0      | 0      | 0      |
| Marinitoga           | 1              | 15             | 0      | 0      | 0      | 0      | 0      | 0      | 0      | 0      | 0      | 0      | 0      | 0      | 0      | 0      | 0      | 0      | 0      |
| Marinobacter         | 2              | 163            | 0      | 0      | 0      | 0      | 0      | 0      | 0      | 1      | 0      | 0      | 0      | 0      | 0      | 0      | 0      | 0      | 0      |
| Marinomonas          | 3              | 192            | 0      | 0      | 0      | 0      | 0      | 0      | 0      | 0      | 0      | 0      | 1      | 0      | 0      | 0      | 0      | 0      | 0      |
| Maritimibacter       | 1              | 7              | 0      | 0      | 0      | 0      | 0      | 0      | 0      | 0      | 0      | 0      | 0      | 0      | 0      | 0      | 0      | 0      | 0      |
| Marivirga            | 2              | 96             | 0      | 0      | 0      | 0      | 0      | 0      | 0      | 0      | 0      | 0      | 0      | 0      | 0      | 0      | 0      | 0      | 0      |
| Martella             | 1              | 3              | 0      | 0      | 0      | 0      | 0      | 0      | 0      | 0      | 0      | 0      | 0      | 0      | 0      | 0      | 0      | 0      | 0      |
| Marvinbryantia       | 1              | 1              | 0      | 0      | 0      | 0      | 0      | 0      | 0      | 0      | 0      | 0      | 0      | 0      | 0      | 0      | 0      | 0      | 0      |
| Massilia             | 1              | 4              | 0      | 0      | 0      | 0      | 0      | 0      | 0      | 0      | 0      | 0      | 0      | 0      | 0      | 0      | 0      | 0      | 0      |
| Mastigocladopsis     | 1              | 16             | 0      | 0      | 0      | 0      | 0      | 0      | 0      | 0      | 0      | 0      | 0      | 0      | 0      | 0      | 0      | 0      | 0      |
| Megamonas            | 1              | 47             | 0      | 0      | 0      | 0      | 0      | 0      | 0      | 0      | 0      | 0      | 0      | 0      | 0      | 0      | 0      | 0      | 0      |
| Megasphaera          | 1              | 14             | 0      | 0      | 0      | 0      | 0      | 0      | 0      | 0      | 0      | 0      | 0      | 0      | 0      | 0      | 0      | 0      | 0      |
| Meiothermus          | 2              | 110            | 0      | 0      | 0      | 0      | 0      | 0      | 0      | 0      | 0      | 0      | 0      | 0      | 0      | 0      | 0      | 0      | 0      |
| Melissococcus        | 2              | 46             | 0      | 0      | 0      | 0      | 0      | 0      | 0      | 0      | 0      | 0      | 0      | 0      | 0      | 0      | 0      | 0      | 0      |
| Mesoflavibacter      | 1              | 6              | 0      | 0      | 0      | 0      | 0      | 0      | 0      | 0      | 0      | 0      | 0      | 0      | 0      | 0      | 0      | 0      | 0      |
| Mesoplasma           | 1              | 23             | 0      | 0      | 0      | 0      | 0      | 0      | 0      | 0      | 0      | 0      | 0      | 0      | 0      | 0      | 0      | 0      | 0      |
| Mesorhizobium        | 2              | 201            | 0      | 0      | 0      | 0      | 0      | 0      | 0      | 0      | 0      | 0      | 0      | 0      | 0      | 0      | 1      | 0      | 0      |
| Mesotoga             | 1              | 14             | 0      | 0      | 0      | 0      | 0      | 0      | 0      | 0      | 0      | 0      | 0      | 0      | 0      | 0      | 0      | 0      | 0      |
| Metallosphaera       | 1              | 18             | 0      | 0      | 0      | 0      | 0      | 0      | 0      | 0      | 0      | 0      | 0      | 0      | 0      | 0      | 0      | 0      | 0      |
| Methanobacterium     | 1              | 7              | 0      | 0      | 0      | 0      | 0      | 0      | 0      | 0      | 0      | 0      | 0      | 0      | 0      | 0      | 0      | 0      | 0      |
| Methanobrevibacter   | 1              | 9              | 0      | 0      | 0      | 0      | 0      | 0      | 0      | 0      | 0      | 0      | 0      | 0      | 0      | 0      | 0      | 0      | 0      |
| Methanocaldococcus   | 1              | 6              | 0      | 0      | 0      | 0      | 0      | 0      | 0      | 0      | 0      | 0      | 0      | 0      | 0      | 0      | 0      | 0      | 0      |
| Methanocella         | 1              | 15             | 0      | 0      | 0      | 0      | 0      | 0      | 0      | 0      | 0      | 0      | 0      | 0      | 0      | 0      | 0      | 0      | 0      |
| Methanococcaceae     | 1              | 1              | 0      | 0      | 0      | 0      | 0      | 0      | 0      | 0      | 0      | 0      | 0      | 0      | 0      | 0      | 0      | 0      | 0      |
| Methanococcoides     | 1              | 5              | 0      | 0      | 0      | 0      | 0      | 0      | 0      | 0      | 0      | 0      | 0      | 0      | 0      | 0      | 0      | 0      | 0      |
| Methanococcus        | 1              | 9              | 0      | 0      | 0      | 0      | 0      | 0      | 0      | 0      | 0      | 0      | 0      | 0      | 0      | 0      | 0      | 0      | 0      |
| Methanocorpusculum   | 1              | 7              | 0      | 0      | 0      | 0      | 0      | 0      | 0      | 0      | 0      | 0      | 0      | 0      | 0      | 0      | 0      | 0      | 0      |
| Methanoculleus       | 1              | 8              | 0      | 0      | 0      | 0      | 0      | 0      | 0      | 0      | 0      | 0      | 0      | 0      | 0      | 0      | 0      | 0      | 0      |
| Methanohalobium      | 1              | 5              | 0      | 0      | 0      | 0      | 0      | 0      | 0      | 0      | 0      | 0      | 0      | 0      | 0      | 0      | 0      | 0      | 0      |
| Methanohalophilus    | 1              | 5              | 0      | 0      | 0      | 0      | 0      | 0      | 0      | 0      | 0      | 0      | 0      | 0      | 0      | 0      | 0      | 0      | 0      |
| Methanolobus         | 1              | 5              | 0      | 0      | 0      | 0      | 0      | 0      | 0      | 0      | 0      | 0      | 0      | 0      | 0      | 0      | 0      | 0      | 0      |
| Methanomethylovorans | 1              | 5              | 0      | 0      | 0      | 0      | 0      | 0      | 0      | 0      | 0      | 0      | 0      | 0      | 0      | 0      | 0      | 0      | 0      |
| Methanoplanus        | 1              | 7              | 0      | 0      | 0      | 0      | 0      | 0      | 0      | 0      | 0      | 0      | 0      | 0      | 0      | 0      | 0      | 0      | 0      |
| Methanopyrus         | 1              | 4              | 0      | 0      | 0      | 0      | 0      | 0      | 0      | 0      | 0      | 0      | 0      | 0      | 0      | 0      | 0      | 0      | 0      |
| Methanoregula        | 1              | 8              | 0      | 0      | 0      | 0      | 0      | 0      | 0      | 0      | 0      | 0      | 0      | 0      | 0      | 0      | 0      | 0      | 0      |
| Methanosaeta         | 1              | 9              | 0      | 0      | 0      | 0      | 0      | 0      | 0      | 0      | 0      | 0      | 0      | 0      | 0      | 0      | 0      | 0      | 0      |
| Methanosalsum        | 1              | 7              | 0      | 0      | 0      | 0      | 0      | 0      | 0      | 0      | 0      | 0      | 0      | 0      | 0      | 0      | 0      | 0      | 0      |

| Genus               | Cluster Number | Protein Counts | K15982 | K16045 | K16047 | K16049 | K16050 | K16051 | K16173 | K16249 | K16269 | K16270 | K16514 | K16873 | K16874 | K16876 | K16880 | K17067 | K17070 |
|---------------------|----------------|----------------|--------|--------|--------|--------|--------|--------|--------|--------|--------|--------|--------|--------|--------|--------|--------|--------|--------|
| Methanosarcina      | 1              | 18             | 0      | 0      | 0      | 0      | 0      | 0      | 0      | 0      | 0      | 0      | 0      | 0      | 0      | 0      | 0      | 0      | 0      |
| Methanosphaera      | 1              | 7              | 0      | 0      | 0      | 0      | 0      | 0      | 0      | 0      | 0      | 0      | 0      | 0      | 0      | 0      | 0      | 0      | 0      |
| Methanosphaerula    | 1              | 8              | 0      | 0      | 0      | 0      | 0      | 0      | 0      | 0      | 0      | 0      | 0      | 0      | 0      | 0      | 0      | 0      | 0      |
| Methanospirillum    | 1              | 6              | 0      | 0      | 0      | 0      | 0      | 0      | 0      | 0      | 0      | 0      | 0      | 0      | 0      | 0      | 0      | 0      | 0      |
| Methanothermobacter | 1              | 6              | 0      | 0      | 0      | 0      | 0      | 0      | 0      | 0      | 0      | 0      | 0      | 0      | 0      | 0      | 0      | 0      | 0      |
| Methanothermococcus | 1              | 5              | 0      | 0      | 0      | 0      | 0      | 0      | 0      | 0      | 0      | 0      | 0      | 0      | 0      | 0      | 0      | 0      | 0      |
| Methanothermus      | 1              | 5              | 0      | 0      | 0      | 0      | 0      | 0      | 0      | 0      | 0      | 0      | 0      | 0      | 0      | 0      | 0      | 0      | 0      |
| Methanotorris       | 1              | 5              | 0      | 0      | 0      | 0      | 0      | 0      | 0      | 0      | 0      | 0      | 0      | 0      | 0      | 0      | 0      | 0      | 0      |
| Methylacidiphilum   | 2              | 48             | 0      | 0      | 0      | 0      | 0      | 0      | 0      | 0      | 0      | 0      | 0      | 0      | 0      | 0      | 0      | 0      | 0      |
| Methylarcula        | 1              | 2              | 0      | 0      | 0      | 0      | 0      | 0      | 0      | 0      | 0      | 0      | 0      | 0      | 0      | 0      | 0      | 0      | 0      |
| Methylibium         | 1              | 38             | 0      | 0      | 0      | 0      | 0      | 0      | 0      | 1      | 0      | 0      | 0      | 0      | 0      | 0      | 0      | 0      | 0      |
| Methylobacillus     | 2              | 61             | 0      | 0      | 0      | 0      | 0      | 0      | 0      | 0      | 0      | 0      | 0      | 0      | 0      | 0      | 0      | 0      | 0      |
| Methylobacterium    | 3              | 236            | 0      | 0      | 0      | 0      | 0      | 0      | 0      | 0      | 0      | 0      | 0      | 1      | 1      | 1      | 1      | 0      | 1      |
| Methylocella        | 3              | 117            | 0      | 0      | 0      | 0      | 0      | 0      | 0      | 0      | 0      | 0      | 0      | 0      | 0      | 0      | 0      | 0      | 0      |
| Methylococcus       | 2              | 80             | 0      | 0      | 0      | 0      | 0      | 0      | 0      | 0      | 0      | 0      | 0      | 0      | 0      | 0      | 0      | 0      | 0      |
| Methylocystis       | 1              | 21             | 0      | 0      | 0      | 0      | 0      | 0      | 0      | 0      | 0      | 0      | 0      | 0      | 0      | 0      | 0      | 0      | 0      |
| Methyloferula       | 1              | 2              | 0      | 0      | 0      | 0      | 0      | 0      | 0      | 0      | 0      | 0      | 0      | 0      | 0      | 0      | 0      | 0      | 0      |
| Methylomicrobium    | 1              | 12             | 0      | 0      | 0      | 0      | 0      | 0      | 0      | 0      | 0      | 0      | 0      | 0      | 0      | 0      | 0      | 0      | 0      |
| Methylomonas        | 1              | 15             | 0      | 0      | 0      | 0      | 0      | 0      | 0      | 0      | 0      | 0      | 0      | 0      | 0      | 0      | 0      | 0      | 0      |
| Methylophaga        | 1              | 7              | 0      | 0      | 0      | 0      | 0      | 0      | 0      | 0      | 0      | 0      | 0      | 0      | 0      | 0      | 0      | 0      | 0      |
| Methylophilus       | 1              | 2              | 0      | 0      | 0      | 0      | 0      | 0      | 0      | 0      | 0      | 0      | 0      | 0      | 0      | 0      | 0      | 0      | 0      |
| Methylosinus        | 1              | 2              | 0      | 0      | 0      | 0      | 0      | 0      | 0      | 0      | 0      | 0      | 0      | 0      | 0      | 0      | 0      | 0      | 0      |
| Methylotenera       | 2              | 72             | 0      | 0      | 0      | 0      | 0      | 0      | 0      | 0      | 0      | 0      | 0      | 0      | 0      | 0      | 0      | 0      | 0      |
| Methyloversatilis   | 1              | 5              | 0      | 0      | 0      | 0      | 0      | 0      | 0      | 0      | 0      | 0      | 0      | 0      | 0      | 0      | 0      | 0      | 0      |
| Methylovorus        | 2              | 66             | 0      | 0      | 0      | 0      | 0      | 0      | 0      | 0      | 0      | 0      | 0      | 0      | 0      | 0      | 0      | 0      | 0      |
| Micavibrio          | 1              | 9              | 0      | 0      | 0      | 0      | 0      | 0      | 0      | 0      | 0      | 0      | 0      | 0      | 0      | 0      | 0      | 0      | 0      |
| Microbacterium      | 2              | 115            | 0      | 0      | 0      | 0      | 0      | 0      | 0      | 0      | 0      | 0      | 0      | 0      | 0      | 0      | 0      | 0      | 0      |
| Microchaete         | 1              | 23             | 0      | 0      | 0      | 0      | 0      | 0      | 0      | 0      | 0      | 0      | 0      | 0      | 0      | 0      | 0      | 0      | 0      |
| Micrococcus         | 2              | 72             | 0      | 0      | 0      | 0      | 0      | 0      | 0      | 0      | 0      | 0      | 0      | 0      | 0      | 0      | 0      | 0      | 0      |
| Microcoleus         | 1              | 17             | 0      | 0      | 0      | 0      | 0      | 0      | 0      | 0      | 0      | 0      | 0      | 0      | 0      | 0      | 0      | 0      | 0      |
| Microcystis         | 2              | 67             | 0      | 0      | 0      | 0      | 0      | 0      | 0      | 0      | 0      | 0      | 0      | 0      | 0      | 0      | 0      | 0      | 0      |
| Microlunatus        | 1              | 25             | 0      | 0      | 0      | 0      | 0      | 0      | 0      | 0      | 0      | 0      | 0      | 0      | 0      | 0      | 0      | 0      | 0      |
| Micromonospora      | 2              | 115            | 0      | 0      | 0      | 0      | 0      | 0      | 0      | 0      | 0      | 0      | 0      | 0      | 0      | 0      | 0      | 0      | 0      |
| Microvirga          | 1              | 6              | 0      | 0      | 0      | 0      | 0      | 0      | 0      | 0      | 0      | 0      | 0      | 0      | 0      | 0      | 0      | 0      | 0      |
| Mobiluncus          | 1              | 41             | 0      | 0      | 0      | 0      | 0      | 0      | 0      | 0      | 0      | 0      | 0      | 0      | 0      | 0      | 0      | 0      | 0      |
| Modestobacter       | 1              | 43             | 0      | 0      | 0      | 0      | 0      | 0      | 0      | 0      | 0      | 0      | 1      | 0      | 0      | 0      | 0      | 0      | 0      |
| Moorea              | 1              | 2              | 0      | 0      | 0      | 0      | 0      | 0      | 0      | 0      | 0      | 0      | 0      | 0      | 0      | 0      | 0      | 0      | 0      |
| Moorella            | 2              | 69             | 0      | 0      | 0      | 0      | 0      | 0      | 0      | 0      | 0      | 0      | 0      | 0      | 0      | 0      | 0      | 0      | 0      |
| Moraxella           | 2              | 66             | 0      | 0      | 0      | 0      | 0      | 0      | 0      | 0      | 0      | 0      | 0      | 0      | 0      | 0      | 0      | 0      | 0      |
| Morganella          | 1              | 29             | 0      | 0      | 0      | 0      | 0      | 0      | 0      | 0      | 0      | 0      | 0      | 0      | 0      | 0      | 0      | 0      | 0      |
| Moritella           | 1              | 2              | 0      | 0      | 0      | 0      | 0      | 0      | 0      | 0      | 0      | 0      | 0      | 0      | 0      | 0      | 0      | 0      | 0      |
| Muricauda           | 1              | 23             | 0      | 0      | 0      | 0      | 0      | 0      | 0      | 0      | 0      | 0      | 0      | 0      | 0      | 0      | 0      | 0      | 0      |
| Mycobacterium       | 3              | 306            | 1      | 1      | 1      | 1      | 1      | 1      | 0      | 0      | 0      | 0      | 0      | 0      | 0      | 0      | 0      | 1      | 0      |
| Mycoplasma          | 1              | 53             | 0      | 0      | 0      | 0      | 0      | 0      | 0      | 0      | 0      | 0      | 0      | 0      | 0      | 0      | 0      | 0      | 0      |
| Myxococcus          | 2              | 110            | 0      | 0      | 0      | 0      | 0      | 0      | 0      | 0      | 0      | 0      | 0      | 0      | 0      | 0      | 0      | 0      | 0      |
| Nakamurella         | 2              | 115            | 0      | 0      | 0      | 0      | 0      | 0      | 0      | 0      | 0      | 0      | 0      | 0      | 0      | 0      | 0      | 1      | 0      |
| napthalene          | 1              | 2              | 0      | 0      | 0      | 0      | 0      | 0      | 0      | 0      | 0      | 0      | 0      | 0      | 0      | 0      | 0      | 0      | 0      |
| Natranaerobius      | 2              | 55             | 0      | 0      | 0      | 0      | 0      | 0      | 0      | 0      | 0      | 0      | 0      | 0      | 0      | 0      | 0      | 0      | 0      |
| Natrialba           | 1              | 16             | 0      | 0      | 0      | 0      | 0      | 0      | 0      | 0      | 0      | 0      | 0      | 0      | 0      | 0      | 0      | 0      | 0      |
| Natrinema           | 1              | 16             | 0      | 0      | 0      | 0      | 0      | 0      | 0      | 0      | 0      | 0      | 0      | 0      | 0      | 0      | 0      | 0      | 0      |
| Natronobacterium    | 1              | 11             | 0      | 0      | 0      | 0      | 0      | 0      | 0      | 0      | 0      | 0      | 0      | 0      | 0      | 0      | 0      | 0      | 0      |
| Natronococcus       | 1              | 21             | 0      | 0      | 0      | 0      | 0      | 0      | 0      | 0      | 0      | 0      | 0      | 0      | 0      | 0      | 0      | 0      | 0      |

| Genus             | Cluster Number | Protein Counts | K15982 | K16045 | K16047 | K16049 | K16050 | K16051 | K16173 | K16249 | K16269 | K16270 | K16514 | K16873 | K16874 | K16876 | K16880 | K17067 | K17070 |
|-------------------|----------------|----------------|--------|--------|--------|--------|--------|--------|--------|--------|--------|--------|--------|--------|--------|--------|--------|--------|--------|
| Natronomonas      | 1              | 20             | 0      | 0      | 0      | 0      | 0      | 0      | 0      | 0      | 0      | 0      | 0      | 0      | 0      | 0      | 0      | 0      | 0      |
| Nautilia          | 2              | 48             | 0      | 0      | 0      | 0      | 0      | 0      | 0      | 0      | 0      | 0      | 0      | 0      | 0      | 0      | 0      | 0      | 0      |
| Neisseria         | 2              | 67             | 0      | 0      | 0      | 0      | 0      | 0      | 0      | 0      | 0      | 0      | 0      | 0      | 0      | 0      | 0      | 0      | 0      |
| Neisseriaceae     | 1              | 1              | 0      | 0      | 0      | 0      | 0      | 0      | 0      | 0      | 0      | 0      | 0      | 0      | 0      | 0      | 0      | 0      | 0      |
| Neorickettsia     | 1              | 31             | 0      | 0      | 0      | 0      | 0      | 0      | 0      | 0      | 0      | 0      | 0      | 0      | 0      | 0      | 0      | 0      | 0      |
| Neptuniibacter    | 1              | 2              | 0      | 0      | 0      | 0      | 0      | 0      | 0      | 0      | 0      | 0      | 0      | 0      | 0      | 0      | 0      | 0      | 0      |
| Niastella         | 1              | 21             | 0      | 0      | 0      | 0      | 0      | 0      | 0      | 0      | 0      | 0      | 0      | 0      | 0      | 0      | 0      | 0      | 0      |
| Nitratifractor    | 2              | 54             | 0      | 0      | 0      | 0      | 0      | 0      | 0      | 0      | 0      | 0      | 0      | 0      | 0      | 0      | 0      | 0      | 0      |
| Nitratireductor   | 1              | 19             | 0      | 0      | 0      | 0      | 0      | 0      | 0      | 0      | 0      | 0      | 0      | 0      | 0      | 0      | 0      | 0      | 0      |
| Nitratiruptor     | 2              | 40             | 0      | 0      | 0      | 0      | 0      | 0      | 0      | 0      | 0      | 0      | 0      | 0      | 0      | 0      | 0      | 0      | 0      |
| Nitrobacter       | 2              | 99             | 0      | 0      | 1      | 0      | 0      | 0      | 0      | 0      | 0      | 0      | 0      | 0      | 0      | 0      | 0      | 0      | 0      |
| Nitrococcus       | 1              | 2              | 0      | 0      | 0      | 0      | 0      | 0      | 0      | 0      | 0      | 0      | 0      | 0      | 0      | 0      | 0      | 0      | 0      |
| Nitrosococcus     | 2              | 94             | 0      | 0      | 0      | 0      | 0      | 0      | 0      | 0      | 0      | 0      | 0      | 0      | 0      | 0      | 0      | 0      | 0      |
| Nitrosomonas      | 2              | 72             | 0      | 0      | 0      | 0      | 0      | 0      | 0      | 0      | 0      | 0      | 0      | 0      | 0      | 0      | 0      | 0      | 0      |
| Nitrosopumilaceae | 1              | 7              | 0      | 0      | 0      | 0      | 0      | 0      | 0      | 0      | 0      | 0      | 0      | 0      | 0      | 0      | 0      | 0      | 0      |
| Nitrosopumilus    | 1              | 11             | 0      | 0      | 0      | 0      | 0      | 0      | 0      | 0      | 0      | 0      | 0      | 0      | 0      | 0      | 0      | 0      | 0      |
| Nitrospira        | 2              | 74             | 0      | 0      | 0      | 0      | 0      | 0      | 0      | 0      | 0      | 0      | 0      | 0      | 0      | 0      | 0      | 0      | 0      |
| Nocardia          | 2              | 185            | 1      | 0      | 1      | 1      | 1      | 1      | 0      | 0      | 0      | 0      | 0      | 0      | 0      | 0      | 0      | 1      | 0      |
| Nocardiodaceae    | 1              | 2              | 0      | 0      | 0      | 0      | 0      | 0      | 0      | 0      | 0      | 0      | 0      | 0      | 0      | 0      | 0      | 0      | 0      |
| Nocardiodes       | 2              | 157            | 1      | 0      | 1      | 0      | 1      | 0      | 0      | 0      | 0      | 0      | 0      | 0      | 0      | 0      | 0      | 0      | 0      |
| Nocardiopsis      | 2              | 102            | 0      | 0      | 0      | 0      | 0      | 0      | 0      | 0      | 0      | 0      | 0      | 0      | 0      | 0      | 0      | 0      | 0      |
| Nodularia         | 1              | 22             | 0      | 0      | 0      | 0      | 0      | 0      | 0      | 0      | 0      | 0      | 0      | 0      | 0      | 0      | 0      | 0      | 0      |
| Nonlabens         | 1              | 19             | 0      | 0      | 0      | 0      | 0      | 0      | 0      | 0      | 0      | 0      | 0      | 0      | 0      | 0      | 0      | 0      | 0      |
| Nostoc            | 2              | 111            | 0      | 0      | 0      | 0      | 0      | 0      | 0      | 0      | 0      | 0      | 0      | 0      | 0      | 0      | 0      | 0      | 0      |
| Nostocaceae       | 1              | 2              | 0      | 0      | 0      | 0      | 0      | 0      | 0      | 0      | 0      | 0      | 0      | 0      | 0      | 0      | 0      | 0      | 0      |
| Novosphingobium   | 2              | 169            | 1      | 0      | 1      | 1      | 0      | 1      | 0      | 0      | 0      | 0      | 1      | 0      | 0      | 0      | 0      | 0      | 0      |
| Oceanibaculum     | 1              | 3              | 0      | 0      | 0      | 0      | 0      | 0      | 0      | 0      | 0      | 0      | 0      | 0      | 0      | 0      | 0      | 0      | 0      |
| Oceanibulbus      | 1              | 12             | 0      | 0      | 0      | 0      | 0      | 0      | 0      | 0      | 0      | 0      | 0      | 0      | 0      | 0      | 0      | 0      | 0      |
| Oceanicola        | 1              | 9              | 0      | 0      | 0      | 0      | 0      | 0      | 0      | 0      | 0      | 0      | 0      | 0      | 0      | 0      | 0      | 0      | 0      |
| Oceanimonas       | 1              | 33             | 0      | 0      | 0      | 0      | 0      | 0      | 0      | 0      | 0      | 0      | 0      | 0      | 0      | 0      | 0      | 0      | 0      |
| Oceaniovalibus    | 1              | 2              | 0      | 0      | 0      | 0      | 0      | 0      | 0      | 0      | 0      | 0      | 0      | 0      | 0      | 0      | 0      | 0      | 0      |
| Oceanithermus     | 2              | 72             | 0      | 0      | 0      | 0      | 0      | 0      | 0      | 0      | 0      | 0      | 0      | 0      | 0      | 0      | 0      | 0      | 0      |
| Oceanobacillus    | 2              | 91             | 0      | 0      | 0      | 0      | 0      | 0      | 0      | 0      | 0      | 0      | 0      | 0      | 0      | 0      | 0      | 0      | 0      |
| Oceanospirillum   | 1              | 2              | 0      | 0      | 0      | 0      | 0      | 0      | 0      | 0      | 0      | 0      | 0      | 0      | 0      | 0      | 0      | 0      | 0      |
| Ochrobactrum      | 2              | 133            | 0      | 0      | 0      | 0      | 0      | 0      | 0      | 0      | 0      | 0      | 0      | 0      | 0      | 0      | 0      | 0      | 0      |
| Octadecabacter    | 1              | 29             | 0      | 0      | 0      | 0      | 0      | 0      | 0      | 0      | 0      | 0      | 0      | 0      | 0      | 0      | 0      | 0      | 0      |
| Oenococcus        | 2              | 41             | 0      | 0      | 0      | 0      | 0      | 0      | 0      | 0      | 0      | 0      | 0      | 0      | 0      | 0      | 0      | 0      | 0      |
| Oleomonas         | 1              | 2              | 0      | 0      | 0      | 0      | 0      | 0      | 0      | 0      | 0      | 0      | 0      | 0      | 0      | 0      | 0      | 0      | 0      |
| Oligotropha       | 3              | 87             | 0      | 0      | 0      | 0      | 0      | 0      | 0      | 0      | 0      | 0      | 0      | 0      | 0      | 0      | 0      | 0      | 0      |
| Olsenella         | 2              | 40             | 0      | 0      | 0      | 0      | 0      | 0      | 0      | 0      | 0      | 0      | 0      | 0      | 0      | 0      | 0      | 0      | 0      |
| Opitutus          | 2              | 67             | 0      | 0      | 0      | 0      | 0      | 0      | 0      | 0      | 0      | 0      | 0      | 0      | 0      | 0      | 0      | 0      | 0      |
| Orientia          | 1              | 21             | 0      | 0      | 0      | 0      | 0      | 0      | 0      | 0      | 0      | 0      | 0      | 0      | 0      | 0      | 0      | 0      | 0      |
| Ornithobacterium  | 1              | 11             | 0      | 0      | 0      | 0      | 0      | 0      | 0      | 0      | 0      | 0      | 0      | 0      | 0      | 0      | 0      | 0      | 0      |
| Oscillatoria      | 1              | 16             | 0      | 0      | 0      | 0      | 0      | 0      | 0      | 0      | 0      | 0      | 0      | 0      | 0      | 0      | 0      | 0      | 0      |
| Oscillatoriales   | 1              | 2              | 0      | 0      | 0      | 0      | 0      | 0      | 0      | 0      | 0      | 0      | 0      | 0      | 0      | 0      | 0      | 0      | 0      |
| Oscillibacter     | 1              | 20             | 0      | 0      | 0      | 0      | 0      | 0      | 0      | 0      | 0      | 0      | 0      | 0      | 0      | 0      | 0      | 0      | 0      |
| Owenweeksia       | 1              | 15             | 0      | 0      | 0      | 0      | 0      | 0      | 0      | 0      | 0      | 0      | 0      | 0      | 0      | 0      | 0      | 0      | 0      |
| Oxalobacteraceae  | 1              | 4              | 0      | 0      | 0      | 0      | 0      | 0      | 0      | 0      | 0      | 0      | 0      | 0      | 0      | 0      | 0      | 0      | 0      |
| Paenibacillus     | 2              | 152            | 0      | 0      | 0      | 0      | 0      | 0      | 0      | 0      | 0      | 0      | 0      | 0      | 0      | 0      | 0      | 0      | 0      |
| Paludibacter      | 2              | 67             | 0      | 0      | 0      | 0      | 0      | 0      | 0      | 0      | 0      | 0      | 0      | 0      | 0      | 0      | 0      | 0      | 0      |
| Pandoraea         | 1              | 18             | 0      | 0      | 0      | 0      | 0      | 0      | 0      | 0      | 1      | 0      | 0      | 0      | 0      | 0      | 0      | 0      | 0      |
| Pannonibacter     | 1              | 3              | 0      | 0      | 0      | 0      | 0      | 0      | 0      | 0      | 0      | 0      | 0      | 0      | 0      | 0      | 0      | 0      | 0      |

| Genus              | Cluster Number | Protein Counts | K15982 | K16045 | K16047 | K16049 | K16050 | K16051 | K16173 | K16249 | K16269 | K16270 | K16514 | K16873 | K16874 | K16876 | K16880 | K17067 | K17070 |
|--------------------|----------------|----------------|--------|--------|--------|--------|--------|--------|--------|--------|--------|--------|--------|--------|--------|--------|--------|--------|--------|
| Pantholops         | 1              | 23             | 0      | 0      | 0      | 0      | 0      | 0      | 0      | 0      | 0      | 0      | 0      | 0      | 0      | 0      | 0      | 0      | 0      |
| Pantoea            | 2              | 181            | 0      | 0      | 0      | 0      | 0      | 0      | 0      | 0      | 0      | 0      | 1      | 0      | 0      | 0      | 0      | 0      | 0      |
| Parabacteroides    | 2              | 64             | 0      | 0      | 0      | 0      | 0      | 0      | 0      | 0      | 0      | 0      | 0      | 0      | 0      | 0      | 0      | 0      | 0      |
| Parachlamydia      | 1              | 11             | 0      | 0      | 0      | 0      | 0      | 0      | 0      | 0      | 0      | 0      | 0      | 0      | 0      | 0      | 0      | 0      | 0      |
| Paracoccus         | 2              | 169            | 0      | 0      | 0      | 0      | 0      | 0      | 0      | 0      | 0      | 0      | 0      | 0      | 0      | 0      | 0      | 0      | 0      |
| Parvibaculum       | 3              | 117            | 0      | 0      | 0      | 0      | 0      | 0      | 0      | 0      | 0      | 0      | 0      | 0      | 0      | 0      | 0      | 0      | 0      |
| Parvularcula       | 2              | 72             | 0      | 0      | 0      | 0      | 0      | 0      | 0      | 0      | 0      | 0      | 0      | 0      | 0      | 0      | 0      | 0      | 0      |
| Pasteurella        | 2              | 85             | 0      | 0      | 0      | 0      | 0      | 0      | 0      | 0      | 0      | 0      | 0      | 0      | 0      | 0      | 0      | 0      | 0      |
| Pasteurellaceae    | 1              | 2              | 0      | 0      | 0      | 0      | 0      | 0      | 0      | 0      | 0      | 0      | 0      | 0      | 0      | 0      | 0      | 0      | 0      |
| Pectobacterium     | 1              | 44             | 0      | 0      | 0      | 0      | 0      | 0      | 0      | 0      | 0      | 0      | 0      | 0      | 0      | 0      | 0      | 0      | 0      |
| Pediococcus        | 1              | 43             | 0      | 0      | 0      | 0      | 0      | 0      | 0      | 0      | 0      | 0      | 0      | 0      | 0      | 0      | 0      | 0      | 0      |
| Pedobacter         | 2              | 88             | 0      | 0      | 0      | 0      | 0      | 0      | 0      | 0      | 0      | 0      | 0      | 0      | 0      | 0      | 0      | 0      | 0      |
| Pelagibaca         | 1              | 10             | 0      | 0      | 0      | 0      | 0      | 0      | 0      | 0      | 0      | 0      | 0      | 0      | 0      | 0      | 0      | 0      | 0      |
| Pelagibacterium    | 1              | 39             | 0      | 0      | 0      | 0      | 0      | 0      | 0      | 0      | 0      | 0      | 1      | 0      | 0      | 0      | 0      | 0      | 0      |
| Pelobacter         | 2              | 85             | 0      | 0      | 0      | 0      | 0      | 0      | 0      | 0      | 0      | 0      | 0      | 0      | 0      | 0      | 0      | 0      | 0      |
| Pelodictyon        | 2              | 62             | 0      | 0      | 0      | 0      | 0      | 0      | 0      | 0      | 0      | 0      | 0      | 0      | 0      | 0      | 0      | 0      | 0      |
| Pelosinus          | 1              | 1              | 0      | 0      | 0      | 0      | 0      | 0      | 0      | 0      | 0      | 0      | 0      | 0      | 0      | 0      | 0      | 0      | 0      |
| Pelotomaculum      | 2              | 60             | 0      | 0      | 0      | 0      | 0      | 0      | 0      | 0      | 0      | 0      | 0      | 0      | 1      | 0      | 0      | 0      | 0      |
| Peptostreptococcus | 1              | 1              | 0      | 0      | 0      | 0      | 0      | 0      | 0      | 0      | 0      | 0      | 0      | 0      | 0      | 0      | 0      | 0      | 0      |
| Persephonella      | 2              | 55             | 0      | 0      | 0      | 0      | 0      | 0      | 0      | 0      | 0      | 0      | 0      | 0      | 0      | 0      | 0      | 0      | 0      |
| Petrotoga          | 2              | 72             | 0      | 0      | 0      | 0      | 0      | 0      | 0      | 0      | 0      | 0      | 0      | 0      | 0      | 0      | 0      | 0      | 0      |
| Phaeobacter        | 2              | 55             | 0      | 0      | 0      | 0      | 0      | 0      | 0      | 0      | 0      | 0      | 0      | 0      | 0      | 0      | 0      | 0      | 0      |
| Phenylobacterium   | 3              | 103            | 0      | 0      | 0      | 0      | 0      | 0      | 0      | 0      | 0      | 0      | 0      | 0      | 0      | 0      | 0      | 0      | 0      |
| Photobacterium     | 2              | 119            | 0      | 0      | 0      | 0      | 0      | 0      | 0      | 0      | 0      | 0      | 0      | 0      | 0      | 0      | 0      | 0      | 0      |
| Photorhabdus       | 2              | 149            | 0      | 0      | 0      | 0      | 0      | 0      | 0      | 0      | 0      | 0      | 0      | 0      | 0      | 0      | 0      | 0      | 0      |
| Phycisphaera       | 1              | 9              | 0      | 0      | 0      | 0      | 0      | 0      | 0      | 0      | 0      | 0      | 0      | 0      | 0      | 0      | 0      | 0      | 0      |
| Phyllobacterium    | 1              | 6              | 0      | 0      | 0      | 0      | 0      | 0      | 0      | 0      | 0      | 0      | 0      | 0      | 0      | 0      | 0      | 0      | 0      |
| Picrophilus        | 1              | 15             | 0      | 0      | 0      | 0      | 0      | 0      | 0      | 0      | 0      | 0      | 0      | 0      | 0      | 0      | 0      | 0      | 0      |
| Pirellula          | 2              | 85             | 0      | 0      | 0      | 0      | 0      | 0      | 0      | 0      | 0      | 0      | 0      | 0      | 0      | 0      | 0      | 0      | 0      |
| Planctomyces       | 2              | 93             | 0      | 0      | 0      | 0      | 0      | 0      | 0      | 0      | 0      | 0      | 0      | 0      | 0      | 0      | 0      | 0      | 0      |
| Plautia            | 1              | 17             | 0      | 0      | 0      | 0      | 0      | 0      | 0      | 0      | 0      | 0      | 0      | 0      | 0      | 0      | 0      | 0      | 0      |
| Plesiomonas        | 1              | 4              | 0      | 0      | 0      | 0      | 0      | 0      | 0      | 0      | 0      | 0      | 0      | 0      | 0      | 0      | 0      | 0      | 0      |
| Pleurocapsa        | 1              | 23             | 0      | 0      | 0      | 0      | 0      | 0      | 0      | 0      | 0      | 0      | 0      | 0      | 0      | 0      | 0      | 0      | 0      |
| Polaribacter       | 2              | 74             | 0      | 0      | 0      | 0      | 0      | 0      | 0      | 0      | 0      | 0      | 0      | 0      | 0      | 0      | 0      | 0      | 0      |
| Polaromonas        | 3              | 238            | 0      | 0      | 0      | 0      | 0      | 0      | 0      | 0      | 0      | 0      | 1      | 0      | 0      | 0      | 0      | 0      | 0      |
| Polymorphum        | 3              | 173            | 0      | 0      | 0      | 0      | 0      | 0      | 0      | 0      | 0      | 0      | 1      | 0      | 0      | 0      | 0      | 0      | 0      |
| Polynucleobacter   | 1              | 19             | 0      | 0      | 0      | 0      | 0      | 0      | 0      | 0      | 0      | 0      | 0      | 0      | 0      | 0      | 0      | 0      | 0      |
| Ponticaulis        | 1              | 1              | 0      | 0      | 0      | 0      | 0      | 0      | 0      | 0      | 0      | 0      | 0      | 0      | 0      | 0      | 0      | 0      | 0      |
| Porphyromonas      | 2              | 63             | 0      | 0      | 0      | 0      | 0      | 0      | 0      | 0      | 0      | 0      | 0      | 0      | 0      | 0      | 0      | 0      | 0      |
| Prevotella         | 1              | 65             | 0      | 0      | 0      | 0      | 0      | 0      | 0      | 0      | 0      | 0      | 0      | 0      | 0      | 0      | 0      | 0      | 0      |
| Prochlorococcus    | 2              | 68             | 0      | 0      | 0      | 0      | 0      | 0      | 0      | 0      | 0      | 0      | 0      | 0      | 0      | 0      | 0      | 0      | 0      |
| Propionibacterium  | 1              | 62             | 0      | 0      | 0      | 0      | 0      | 0      | 0      | 0      | 0      | 0      | 0      | 0      | 0      | 0      | 0      | 0      | 0      |
| Prosthecochloris   | 1              | 16             | 0      | 0      | 0      | 0      | 0      | 0      | 0      | 0      | 0      | 0      | 0      | 0      | 0      | 0      | 0      | 0      | 0      |
| Proteobacteria     | 1              | 19             | 0      | 0      | 0      | 0      | 0      | 0      | 0      | 0      | 0      | 0      | 0      | 0      | 0      | 0      | 0      | 0      | 0      |
| Proteus            | 2              | 113            | 0      | 0      | 0      | 0      | 0      | 0      | 0      | 0      | 0      | 0      | 0      | 0      | 0      | 0      | 0      | 0      | 0      |
| Providencia        | 1              | 38             | 0      | 0      | 0      | 0      | 0      | 0      | 0      | 0      | 0      | 0      | 0      | 0      | 0      | 0      | 0      | 0      | 0      |
| Pseudaminobacter   | 1              | 10             | 0      | 0      | 0      | 0      | 0      | 0      | 0      | 0      | 0      | 0      | 0      | 0      | 0      | 0      | 0      | 0      | 0      |
| Pseudanabaena      | 1              | 11             | 0      | 0      | 0      | 0      | 0      | 0      | 0      | 0      | 0      | 0      | 0      | 0      | 0      | 0      | 0      | 0      | 0      |
| Pseudoalteromonas  | 2              | 188            | 1      | 0      | 1      | 1      | 1      | 0      | 0      | 0      | 0      | 0      | 1      | 0      | 0      | 0      | 0      | 0      | 0      |
| Pseudochrobactrum  | 1              | 7              | 0      | 0      | 0      | 0      | 0      | 0      | 0      | 0      | 0      | 0      | 0      | 0      | 0      | 0      | 0      | 0      | 0      |
| Pseudogulbenkiania | 1              | 40             | 0      | 0      | 0      | 0      | 0      | 0      | 0      | 0      | 0      | 0      | 1      | 0      | 0      | 0      | 0      | 0      | 0      |
| pseudomallei       | 3              | 131            | 0      | 0      | 0      | 0      | 0      | 0      | 0      | 0      | 0      | 0      | 0      | 0      | 0      | 0      | 0      | 0      | 0      |

| Genus                   | Cluster Number | Protein Counts | K15982 | K16045 | K16047 | K16049 | K16050 | K16051 | K16173 | K16249 | K16269 | K16270 | K16514 | K16873 | K16874 | K16876 | K16880 | K17067 | K17070 |
|-------------------------|----------------|----------------|--------|--------|--------|--------|--------|--------|--------|--------|--------|--------|--------|--------|--------|--------|--------|--------|--------|
| Pseudomonas             | 3              | 381            | 0      | 0      | 1      | 1      | 1      | 1      | 0      | 1      | 1      | 1      | 1      | 0      | 0      | 1      | 1      | 0      | 0      |
| Pseudonocardia          | 3              | 180            | 0      | 0      | 0      | 0      | 0      | 0      | 0      | 0      | 0      | 0      | 0      | 0      | 0      | 1      | 1      | 0      | 0      |
| Pseudorhodobacter       | 1              | 4              | 0      | 0      | 0      | 0      | 0      | 0      | 0      | 0      | 0      | 0      | 0      | 0      | 0      | 0      | 0      | 0      | 0      |
| Pseudovibrio            | 1              | 33             | 0      | 0      | 0      | 0      | 0      | 0      | 0      | 0      | 0      | 0      | 0      | 0      | 0      | 0      | 0      | 0      | 0      |
| Pseudoxanthomonas       | 2              | 124            | 0      | 0      | 0      | 0      | 0      | 0      | 0      | 1      | 0      | 0      | 0      | 0      | 0      | 0      | 0      | 0      | 0      |
| Psychrobacter           | 2              | 124            | 0      | 0      | 0      | 0      | 0      | 0      | 0      | 0      | 0      | 0      | 0      | 0      | 0      | 0      | 0      | 0      | 0      |
| Psychroflexus           | 1              | 22             | 0      | 0      | 0      | 0      | 0      | 0      | 0      | 0      | 0      | 0      | 0      | 0      | 0      | 0      | 0      | 0      | 0      |
| Psychromonas            | 2              | 110            | 0      | 0      | 0      | 0      | 0      | 0      | 0      | 0      | 0      | 0      | 0      | 0      | 0      | 0      | 0      | 0      | 0      |
| Pusillimonas            | 3              | 111            | 0      | 0      | 0      | 0      | 0      | 0      | 0      | 0      | 0      | 0      | 0      | 0      | 0      | 0      | 0      | 0      | 0      |
| Pyrobaculum             | 1              | 15             | 0      | 0      | 0      | 0      | 0      | 0      | 0      | 0      | 0      | 0      | 0      | 0      | 0      | 0      | 0      | 0      | 0      |
| Pyrococcus              | 1              | 10             | 0      | 0      | 0      | 0      | 0      | 0      | 0      | 0      | 0      | 0      | 0      | 0      | 0      | 0      | 0      | 0      | 0      |
| Pyrolobus               | 1              | 4              | 0      | 0      | 0      | 0      | 0      | 0      | 0      | 0      | 0      | 0      | 0      | 0      | 0      | 0      | 0      | 0      | 0      |
| Rahnella                | 2              | 143            | 0      | 0      | 0      | 0      | 0      | 0      | 0      | 0      | 0      | 0      | 1      | 0      | 0      | 0      | 0      | 0      | 0      |
| Ralstonia               | 3              | 332            | 1      | 0      | 1      | 1      | 1      | 1      | 0      | 1      | 1      | 0      | 1      | 0      | 0      | 1      | 1      | 0      | 0      |
| Ramlibacter             | 1              | 35             | 0      | 0      | 0      | 0      | 0      | 0      | 0      | 0      | 0      | 0      | 0      | 0      | 0      | 0      | 0      | 0      | 0      |
| Raoultella              | 2              | 139            | 0      | 0      | 0      | 0      | 0      | 0      | 0      | 0      | 0      | 0      | 1      | 0      | 0      | 0      | 0      | 0      | 0      |
| Raphidiopsis            | 1              | 5              | 0      | 0      | 0      | 0      | 0      | 0      | 0      | 0      | 0      | 0      | 0      | 0      | 0      | 0      | 0      | 0      | 0      |
| Reinekea                | 1              | 2              | 0      | 0      | 0      | 0      | 0      | 0      | 0      | 0      | 0      | 0      | 0      | 0      | 0      | 0      | 0      | 0      | 0      |
| Renibacterium           | 2              | 67             | 0      | 0      | 0      | 0      | 0      | 0      | 0      | 0      | 0      | 0      | 0      | 0      | 0      | 0      | 0      | 0      | 0      |
| Rhizobiaceae            | 1              | 3              | 0      | 0      | 0      | 0      | 0      | 0      | 0      | 0      | 0      | 0      | 0      | 0      | 0      | 0      | 0      | 0      | 0      |
| Rhizobiales             | 1              | 6              | 0      | 0      | 0      | 0      | 0      | 0      | 0      | 0      | 0      | 0      | 0      | 0      | 0      | 0      | 0      | 0      | 0      |
| Rhizobium               | 3              | 257            | 0      | 0      | 0      | 0      | 0      | 0      | 0      | 0      | 0      | 0      | 1      | 1      | 0      | 0      | 0      | 0      | 0      |
| Rhizobium/Agrobacterium | 2              | 87             | 0      | 0      | 0      | 0      | 0      | 0      | 0      | 0      | 0      | 0      | 0      | 0      | 0      | 0      | 0      | 0      | 0      |
| Rhodanobacter           | 1              | 21             | 0      | 0      | 0      | 0      | 0      | 0      | 0      | 0      | 0      | 0      | 0      | 0      | 0      | 0      | 0      | 0      | 0      |
| Rhodobacter             | 3              | 175            | 0      | 0      | 0      | 0      | 0      | 0      | 0      | 0      | 0      | 0      | 0      | 0      | 0      | 0      | 0      | 0      | 0      |
| Rhodobacteraceae        | 1              | 21             | 0      | 0      | 0      | 0      | 0      | 0      | 0      | 0      | 0      | 0      | 0      | 0      | 0      | 0      | 0      | 0      | 0      |
| Rhodobacterales         | 1              | 34             | 0      | 0      | 0      | 0      | 0      | 0      | 0      | 0      | 0      | 0      | 0      | 0      | 0      | 0      | 0      | 0      | 0      |
| Rhodococcus             | 2              | 292            | 1      | 0      | 1      | 1      | 1      | 1      | 0      | 0      | 0      | 0      | 0      | 0      | 0      | 0      | 0      | 1      | 0      |
| Rhodocyclaceae          | 1              | 7              | 0      | 0      | 0      | 0      | 0      | 0      | 0      | 0      | 0      | 0      | 0      | 0      | 0      | 0      | 0      | 0      | 0      |
| Rhodoferax              | 3              | 144            | 0      | 0      | 0      | 0      | 0      | 0      | 0      | 0      | 0      | 0      | 0      | 0      | 0      | 0      | 0      | 0      | 0      |
| Rhodomicrobium          | 2              | 103            | 0      | 0      | 0      | 0      | 0      | 0      | 0      | 0      | 0      | 0      | 0      | 0      | 0      | 0      | 0      | 0      | 0      |
| Rhodopirellula          | 2              | 87             | 0      | 0      | 0      | 0      | 0      | 0      | 0      | 0      | 0      | 0      | 0      | 0      | 0      | 0      | 0      | 0      | 0      |
| Rhodopseudomonas        | 3              | 246            | 0      | 0      | 0      | 0      | 0      | 0      | 0      | 0      | 0      | 0      | 1      | 0      | 1      | 1      | 1      | 0      | 0      |
| Rhodospirillum          | 2              | 121            | 0      | 0      | 0      | 0      | 0      | 0      | 0      | 0      | 0      | 0      | 0      | 0      | 0      | 0      | 0      | 0      | 0      |
| Rhodothermus            | 2              | 76             | 0      | 0      | 0      | 0      | 0      | 0      | 0      | 0      | 0      | 0      | 0      | 0      | 0      | 0      | 0      | 0      | 0      |
| Rhodovulum              | 1              | 4              | 0      | 0      | 0      | 0      | 0      | 0      | 0      | 0      | 0      | 0      | 0      | 0      | 0      | 0      | 0      | 0      | 0      |
| Richelia                | 1              | 2              | 0      | 0      | 0      | 0      | 0      | 0      | 0      | 0      | 0      | 0      | 0      | 0      | 0      | 0      | 0      | 0      | 0      |
| Rickettsia              | 2              | 43             | 0      | 0      | 0      | 0      | 0      | 0      | 0      | 0      | 0      | 0      | 0      | 0      | 0      | 0      | 0      | 0      | 0      |
| Rickettsiaceae          | 1              | 5              | 0      | 0      | 0      | 0      | 0      | 0      | 0      | 0      | 0      | 0      | 0      | 0      | 0      | 0      | 0      | 0      | 0      |
| Riemerella              | 2              | 61             | 0      | 0      | 0      | 0      | 0      | 0      | 0      | 0      | 0      | 0      | 0      | 0      | 0      | 0      | 0      | 0      | 0      |
| Rivularia               | 1              | 18             | 0      | 0      | 0      | 0      | 0      | 0      | 0      | 0      | 0      | 0      | 0      | 0      | 0      | 0      | 0      | 0      | 0      |
| Robiginitalea           | 2              | 83             | 0      | 0      | 0      | 0      | 0      | 0      | 0      | 0      | 0      | 0      | 0      | 0      | 0      | 0      | 0      | 0      | 0      |
| Roseburia               | 2              | 58             | 0      | 0      | 0      | 0      | 0      | 0      | 0      | 0      | 0      | 0      | 0      | 0      | 0      | 0      | 0      | 0      | 0      |
| Roseibium               | 1              | 3              | 0      | 0      | 0      | 0      | 0      | 0      | 0      | 0      | 0      | 0      | 0      | 0      | 0      | 0      | 0      | 0      | 0      |
| Roseiflexus             | 3              | 100            | 0      | 0      | 0      | 0      | 0      | 0      | 0      | 0      | 0      | 0      | 0      | 0      | 0      | 0      | 0      | 0      | 0      |
| Roseobacter             | 2              | 149            | 0      | 0      | 0      | 0      | 0      | 0      | 0      | 0      | 0      | 0      | 0      | 0      | 0      | 0      | 0      | 0      | 0      |
| Roseomonas              | 1              | 2              | 0      | 0      | 0      | 0      | 0      | 0      | 0      | 0      | 0      | 0      | 0      | 0      | 0      | 0      | 0      | 0      | 0      |
| Roseovarius             | 1              | 15             | 0      | 0      | 0      | 0      | 0      | 0      | 0      | 0      | 0      | 0      | 0      | 0      | 0      | 0      | 0      | 0      | 0      |
| Rothia                  | 1              | 44             | 0      | 0      | 0      | 0      | 0      | 0      | 0      | 0      | 0      | 0      | 0      | 0      | 0      | 0      | 0      | 0      | 0      |
| Rubrivivax              | 1              | 24             | 0      | 0      | 0      | 0      | 0      | 0      | 0      | 0      | 0      | 0      | 0      | 0      | 0      | 0      | 0      | 0      | 0      |
| Rubrobacter             | 3              | 117            | 0      | 0      | 0      | 0      | 0      | 0      | 0      | 0      | 0      | 0      | 0      | 0      | 0      | 0      | 0      | 0      | 0      |
| Ruegeria                | 2              | 189            | 0      | 0      | 0      | 0      | 0      | 0      | 0      | 0      | 0      | 0      | 0      | 0      | 0      | 0      | 0      | 0      | 0      |



| Genus             | Cluster Number | Protein Counts | K15982 | K16045 | K16047 | K16049 | K16050 | K16051 | K16173 | K16249 | K16269 | K16270 | K16514 | K16873 | K16874 | K16876 | K16880 | K17067 | K17070 |
|-------------------|----------------|----------------|--------|--------|--------|--------|--------|--------|--------|--------|--------|--------|--------|--------|--------|--------|--------|--------|--------|
| Ruminococcaceae   | 1              | 2              | 0      | 0      | 0      | 0      | 0      | 0      | 0      | 0      | 0      | 0      | 0      | 0      | 0      | 0      | 0      | 0      | 0      |
| Ruminococcus      | 2              | 101            | 0      | 0      | 0      | 0      | 0      | 0      | 0      | 0      | 0      | 0      | 0      | 0      | 0      | 0      | 0      | 0      | 0      |
| Runella           | 1              | 26             | 0      | 0      | 0      | 0      | 0      | 0      | 0      | 0      | 0      | 0      | 1      | 0      | 0      | 0      | 0      | 0      | 0      |
| Saccharomonospora | 2              | 132            | 0      | 0      | 0      | 0      | 0      | 0      | 0      | 0      | 0      | 0      | 0      | 0      | 0      | 0      | 0      | 0      | 0      |
| Saccharophagus    | 2              | 81             | 0      | 0      | 0      | 0      | 0      | 0      | 0      | 0      | 0      | 0      | 0      | 0      | 0      | 0      | 0      | 0      | 0      |
| Saccharopolyspora | 3              | 194            | 0      | 0      | 0      | 0      | 0      | 0      | 0      | 0      | 0      | 0      | 0      | 0      | 0      | 0      | 0      | 1      | 0      |
| Saccharothrix     | 1              | 32             | 0      | 0      | 0      | 0      | 0      | 0      | 0      | 0      | 0      | 0      | 0      | 0      | 0      | 0      | 0      | 0      | 0      |
| Sagittula         | 1              | 10             | 0      | 0      | 0      | 0      | 0      | 0      | 0      | 0      | 0      | 0      | 0      | 0      | 0      | 0      | 0      | 0      | 0      |
| Salinibacter      | 2              | 77             | 0      | 0      | 0      | 0      | 0      | 0      | 0      | 0      | 0      | 0      | 0      | 0      | 0      | 0      | 0      | 0      | 0      |
| Salinimonas       | 1              | 1              | 0      | 0      | 0      | 0      | 0      | 0      | 0      | 0      | 0      | 0      | 0      | 0      | 0      | 0      | 0      | 0      | 0      |
| Salinispora       | 3              | 127            | 1      | 0      | 1      | 1      | 1      | 1      | 0      | 0      | 0      | 0      | 0      | 0      | 0      | 0      | 0      | 0      | 0      |
| Salinivibrio      | 1              | 2              | 0      | 0      | 0      | 0      | 0      | 0      | 0      | 0      | 0      | 0      | 0      | 0      | 0      | 0      | 0      | 0      | 0      |
| Salmonella        | 2              | 151            | 0      | 0      | 0      | 0      | 0      | 0      | 0      | 0      | 0      | 0      | 0      | 0      | 0      | 0      | 0      | 0      | 0      |
| Sanguibacter      | 2              | 73             | 0      | 0      | 0      | 0      | 0      | 0      | 0      | 0      | 0      | 0      | 0      | 0      | 0      | 0      | 0      | 0      | 0      |
| Saprospira        | 1              | 13             | 0      | 0      | 0      | 0      | 0      | 0      | 0      | 0      | 0      | 0      | 0      | 0      | 0      | 0      | 0      | 0      | 0      |
| Scardovia         | 1              | 1              | 0      | 0      | 0      | 0      | 0      | 0      | 0      | 0      | 0      | 0      | 0      | 0      | 0      | 0      | 0      | 0      | 0      |
| Scytonema         | 1              | 10             | 0      | 0      | 0      | 0      | 0      | 0      | 0      | 0      | 0      | 0      | 0      | 0      | 0      | 0      | 0      | 0      | 0      |
| Sebaldella        | 2              | 69             | 0      | 0      | 0      | 0      | 0      | 0      | 0      | 0      | 0      | 0      | 0      | 0      | 0      | 0      | 0      | 0      | 0      |
| Segniliparus      | 2              | 85             | 0      | 0      | 0      | 0      | 0      | 0      | 0      | 0      | 0      | 0      | 0      | 0      | 0      | 0      | 0      | 0      | 0      |
| Selenomonas       | 2              | 57             | 0      | 0      | 0      | 0      | 0      | 0      | 0      | 0      | 0      | 0      | 0      | 0      | 0      | 0      | 0      | 0      | 0      |
| Serinicoccus      | 1              | 1              | 0      | 0      | 0      | 0      | 0      | 0      | 0      | 0      | 0      | 0      | 0      | 0      | 0      | 0      | 0      | 0      | 0      |
| Serratia          | 2              | 186            | 0      | 0      | 0      | 0      | 0      | 0      | 0      | 0      | 0      | 0      | 1      | 0      | 0      | 0      | 0      | 0      | 0      |
| Shewanella        | 3              | 214            | 1      | 0      | 1      | 1      | 1      | 0      | 0      | 0      | 0      | 0      | 0      | 0      | 0      | 0      | 0      | 0      | 0      |
| Shigella          | 2              | 172            | 0      | 0      | 0      | 0      | 0      | 0      | 0      | 0      | 0      | 0      | 0      | 0      | 0      | 0      | 0      | 0      | 0      |
| Shinella          | 1              | 2              | 0      | 0      | 0      | 0      | 0      | 0      | 0      | 0      | 0      | 0      | 0      | 0      | 0      | 0      | 0      | 0      | 0      |
| Sideroxydans      | 2              | 81             | 0      | 0      | 0      | 0      | 0      | 0      | 0      | 0      | 0      | 0      | 0      | 0      | 0      | 0      | 0      | 0      | 0      |
| Silicibacter      | 2              | 105            | 0      | 0      | 0      | 0      | 0      | 0      | 0      | 0      | 0      | 0      | 0      | 0      | 0      | 0      | 0      | 0      | 0      |
| Simiduia          | 1              | 18             | 0      | 0      | 0      | 0      | 0      | 0      | 0      | 0      | 0      | 0      | 0      | 0      | 0      | 0      | 0      | 0      | 0      |
| Simkania          | 1              | 6              | 0      | 0      | 0      | 0      | 0      | 0      | 0      | 0      | 0      | 0      | 0      | 0      | 0      | 0      | 0      | 0      | 0      |
| Simonsiella       | 1              | 2              | 0      | 0      | 0      | 0      | 0      | 0      | 0      | 0      | 0      | 0      | 0      | 0      | 0      | 0      | 0      | 0      | 0      |
| Singulisphaera    | 1              | 18             | 0      | 0      | 0      | 0      | 0      | 0      | 0      | 0      | 0      | 0      | 0      | 0      | 0      | 0      | 0      | 0      | 0      |
| Sinorhizobium     | 3              | 207            | 0      | 0      | 0      | 0      | 0      | 0      | 0      | 0      | 0      | 0      | 1      | 0      | 0      | 0      | 0      | 0      | 0      |
| Slackia           | 2              | 46             | 0      | 0      | 0      | 0      | 0      | 0      | 0      | 0      | 0      | 0      | 0      | 0      | 0      | 0      | 0      | 0      | 0      |
| Smaragdicooccus   | 1              | 3              | 0      | 0      | 0      | 0      | 0      | 0      | 0      | 0      | 0      | 0      | 0      | 0      | 0      | 0      | 0      | 0      | 0      |
| Sodalis           | 2              | 71             | 0      | 0      | 0      | 0      | 0      | 0      | 0      | 0      | 0      | 0      | 0      | 0      | 0      | 0      | 0      | 0      | 0      |
| Solibacillus      | 1              | 23             | 0      | 0      | 0      | 0      | 0      | 0      | 0      | 0      | 0      | 0      | 0      | 0      | 0      | 0      | 0      | 0      | 0      |
| Solitaea          | 1              | 13             | 0      | 0      | 0      | 0      | 0      | 0      | 0      | 0      | 0      | 0      | 0      | 0      | 0      | 0      | 0      | 0      | 0      |
| Sorangium         | 3              | 115            | 0      | 0      | 0      | 0      | 0      | 0      | 0      | 0      | 0      | 0      | 0      | 0      | 0      | 0      | 0      | 0      | 0      |
| Sphaerobacter     | 2              | 100            | 0      | 0      | 0      | 0      | 0      | 0      | 0      | 0      | 0      | 0      | 0      | 0      | 0      | 0      | 0      | 0      | 0      |
| Sphaerochaeta     | 1              | 42             | 0      | 0      | 0      | 0      | 0      | 0      | 0      | 0      | 0      | 0      | 0      | 0      | 0      | 0      | 0      | 0      | 0      |
| Sphingobacterium  | 3              | 85             | 0      | 0      | 0      | 0      | 0      | 0      | 0      | 0      | 0      | 0      | 0      | 0      | 0      | 0      | 0      | 0      | 0      |
| Sphingobium       | 1              | 179            | 0      | 0      | 1      | 1      | 0      | 0      | 0      | 1      | 0      | 0      | 1      | 0      | 0      | 0      | 0      | 0      | 0      |
| Sphingomonadaceae | 1              | 15             | 0      | 0      | 0      | 0      | 0      | 0      | 0      | 0      | 0      | 0      | 0      | 0      | 0      | 0      | 0      | 0      | 0      |
| Sphingomonas      | 2              | 220            | 1      | 0      | 1      | 1      | 0      | 1      | 0      | 0      | 0      | 0      | 1      | 0      | 0      | 0      | 0      | 0      | 0      |
| Sphingopyxis      | 3              | 99             | 0      | 0      | 0      | 0      | 0      | 0      | 0      | 0      | 0      | 0      | 0      | 0      | 0      | 0      | 0      | 0      | 0      |
| Spirochaeta       | 2              | 103            | 0      | 0      | 0      | 0      | 0      | 0      | 0      | 0      | 0      | 0      | 0      | 0      | 0      | 0      | 0      | 0      | 0      |
| Spiroplasma       | 1              | 6              | 0      | 0      | 0      | 0      | 0      | 0      | 0      | 0      | 0      | 0      | 0      | 0      | 0      | 0      | 0      | 0      | 0      |
| Spirosoma         | 2              | 107            | 0      | 0      | 0      | 0      | 0      | 0      | 0      | 0      | 0      | 0      | 1      | 0      | 0      | 0      | 0      | 0      | 0      |
| Stackebrandtia    | 2              | 110            | 0      | 0      | 0      | 0      | 0      | 0      | 0      | 0      | 0      | 0      | 0      | 0      | 0      | 0      | 0      | 0      | 0      |
| Stanieria         | 1              | 17             | 0      | 0      | 0      | 0      | 0      | 0      | 0      | 0      | 0      | 0      | 0      | 0      | 0      | 0      | 0      | 0      | 0      |
| Staphylococcus    | 2              | 108            | 0      | 0      | 0      | 0      | 0      | 0      | 0      | 0      | 0      | 0      | 0      | 0      | 0      | 0      | 0      | 0      | 0      |
| Staphylothermus   | 1              | 12             | 0      | 0      | 0      | 0      | 0      | 0      | 0      | 0      | 0      | 0      | 0      | 0      | 0      | 0      | 0      | 0      | 0      |

| Genus                  | Cluster Number | Protein Counts | K15982 | K16045 | K16047 | K16049 | K16050 | K16051 | K16173 | K16249 | K16269 | K16270 | K16514 | K16873 | K16874 | K16876 | K16880 | K17067 | K17070 |
|------------------------|----------------|----------------|--------|--------|--------|--------|--------|--------|--------|--------|--------|--------|--------|--------|--------|--------|--------|--------|--------|
| Stappia                | 1              | 2              | 0      | 0      | 0      | 0      | 0      | 0      | 0      | 0      | 0      | 0      | 0      | 0      | 0      | 0      | 0      | 0      | 0      |
| Starkeya               | 3              | 134            | 0      | 0      | 0      | 0      | 0      | 0      | 0      | 0      | 0      | 0      | 0      | 0      | 0      | 0      | 0      | 0      | 0      |
| Stenotrophomonas       | 3              | 104            | 0      | 0      | 0      | 0      | 0      | 0      | 0      | 0      | 0      | 0      | 0      | 0      | 0      | 0      | 0      | 0      | 0      |
| Stigmatella            | 3              | 129            | 0      | 0      | 1      | 0      | 0      | 0      | 0      | 0      | 0      | 0      | 0      | 0      | 0      | 0      | 0      | 0      | 0      |
| Streptobacillus        | 1              | 38             | 0      | 0      | 0      | 0      | 0      | 0      | 0      | 0      | 0      | 0      | 0      | 0      | 0      | 0      | 0      | 0      | 0      |
| Streptococcus          | 2              | 121            | 0      | 0      | 0      | 0      | 0      | 0      | 0      | 0      | 0      | 0      | 0      | 0      | 0      | 0      | 0      | 0      | 0      |
| Streptomyces           | 2              | 253            | 0      | 0      | 1      | 0      | 0      | 0      | 0      | 0      | 0      | 0      | 1      | 0      | 0      | 1      | 1      | 1      | 0      |
| Streptosporangium      | 3              | 148            | 0      | 0      | 1      | 0      | 0      | 0      | 0      | 0      | 0      | 0      | 0      | 0      | 0      | 0      | 0      | 0      | 0      |
| Strigomonas            | 1              | 2              | 0      | 0      | 0      | 0      | 0      | 0      | 0      | 0      | 0      | 0      | 0      | 0      | 0      | 0      | 0      | 0      | 0      |
| Sulfitobacter          | 1              | 10             | 0      | 0      | 0      | 0      | 0      | 0      | 0      | 0      | 0      | 0      | 0      | 0      | 0      | 0      | 0      | 0      | 0      |
| Sulfobacillus          | 1              | 30             | 0      | 0      | 0      | 0      | 0      | 0      | 0      | 0      | 0      | 0      | 0      | 0      | 0      | 0      | 0      | 0      | 0      |
| Sulfolobus             | 1              | 23             | 0      | 0      | 0      | 0      | 0      | 0      | 0      | 0      | 0      | 0      | 0      | 0      | 0      | 0      | 0      | 0      | 0      |
| Sulfuricurvum          | 2              | 67             | 0      | 0      | 0      | 0      | 0      | 0      | 0      | 0      | 0      | 0      | 0      | 0      | 0      | 0      | 0      | 0      | 0      |
| Sulfurihydrogenibium   | 2              | 55             | 0      | 0      | 0      | 0      | 0      | 0      | 0      | 0      | 0      | 0      | 0      | 0      | 0      | 0      | 0      | 0      | 0      |
| Sulfurimonas           | 2              | 60             | 0      | 0      | 0      | 0      | 0      | 0      | 0      | 0      | 0      | 0      | 0      | 0      | 0      | 0      | 0      | 0      | 0      |
| Sulfurospirillum       | 1              | 48             | 0      | 0      | 0      | 0      | 0      | 0      | 0      | 0      | 0      | 0      | 0      | 0      | 0      | 0      | 0      | 0      | 0      |
| Sulfurovum             | 2              | 48             | 0      | 0      | 0      | 0      | 0      | 0      | 0      | 0      | 0      | 0      | 0      | 0      | 0      | 0      | 0      | 0      | 0      |
| Symbiobacterium        | 2              | 68             | 0      | 0      | 0      | 0      | 0      | 0      | 0      | 0      | 0      | 0      | 0      | 0      | 0      | 0      | 0      | 0      | 0      |
| Synechococcus          | 1              | 34             | 0      | 0      | 0      | 0      | 1      | 0      | 0      | 0      | 0      | 0      | 0      | 0      | 0      | 0      | 0      | 0      | 0      |
| Synechocystis          | 1              | 40             | 0      | 0      | 0      | 0      | 0      | 0      | 0      | 0      | 0      | 0      | 0      | 0      | 0      | 0      | 0      | 0      | 0      |
| Synergistetes          | 1              | 27             | 0      | 0      | 0      | 0      | 0      | 0      | 0      | 0      | 0      | 0      | 0      | 0      | 0      | 0      | 0      | 0      | 0      |
| Syntrophobacter        | 2              | 101            | 0      | 0      | 0      | 0      | 0      | 0      | 0      | 0      | 0      | 0      | 0      | 0      | 0      | 0      | 0      | 0      | 0      |
| Syntrophobotulus       | 2              | 71             | 0      | 0      | 0      | 0      | 0      | 0      | 0      | 0      | 0      | 0      | 0      | 0      | 0      | 0      | 0      | 0      | 0      |
| Syntrophomonas         | 2              | 58             | 0      | 0      | 0      | 0      | 0      | 0      | 0      | 0      | 0      | 0      | 0      | 0      | 0      | 0      | 0      | 0      | 0      |
| Syntrophothermus       | 2              | 60             | 0      | 0      | 0      | 0      | 0      | 0      | 0      | 0      | 0      | 0      | 0      | 0      | 0      | 0      | 0      | 0      | 0      |
| Syntrophus             | 2              | 66             | 0      | 0      | 0      | 0      | 0      | 0      | 1      | 0      | 0      | 0      | 0      | 0      | 0      | 0      | 0      | 0      | 0      |
| Tannerella             | 1              | 8              | 0      | 0      | 0      | 0      | 0      | 0      | 0      | 0      | 0      | 0      | 0      | 0      | 0      | 0      | 0      | 0      | 0      |
| Taylorella             | 1              | 43             | 0      | 0      | 0      | 0      | 0      | 0      | 0      | 0      | 0      | 0      | 0      | 0      | 0      | 0      | 0      | 0      | 0      |
| Tepidanaerobacter      | 2              | 55             | 0      | 0      | 0      | 0      | 0      | 0      | 0      | 0      | 0      | 0      | 0      | 0      | 0      | 0      | 0      | 0      | 0      |
| Teredinibacter         | 2              | 109            | 0      | 0      | 0      | 0      | 0      | 0      | 0      | 0      | 0      | 0      | 0      | 0      | 0      | 0      | 0      | 0      | 0      |
| Terrabacter            | 1              | 1              | 0      | 0      | 0      | 0      | 0      | 0      | 0      | 0      | 0      | 0      | 0      | 0      | 0      | 0      | 0      | 0      | 0      |
| Terriglobus            | 2              | 83             | 0      | 0      | 0      | 0      | 0      | 0      | 0      | 0      | 0      | 0      | 0      | 0      | 0      | 0      | 0      | 0      | 0      |
| Tetragenococcus        | 1              | 12             | 0      | 0      | 0      | 0      | 0      | 0      | 0      | 0      | 0      | 0      | 0      | 0      | 0      | 0      | 0      | 0      | 0      |
| Thalassiobium          | 1              | 11             | 0      | 0      | 0      | 0      | 0      | 0      | 0      | 0      | 0      | 0      | 0      | 0      | 0      | 0      | 0      | 0      | 0      |
| Thalassobacter         | 1              | 9              | 0      | 0      | 0      | 0      | 0      | 0      | 0      | 0      | 0      | 0      | 0      | 0      | 0      | 0      | 0      | 0      | 0      |
| Thalassolituus         | 1              | 12             | 0      | 0      | 0      | 0      | 0      | 0      | 0      | 0      | 0      | 0      | 0      | 0      | 0      | 0      | 0      | 0      | 0      |
| Thalassospira          | 1              | 2              | 0      | 0      | 0      | 0      | 0      | 0      | 0      | 0      | 0      | 0      | 0      | 0      | 0      | 0      | 0      | 0      | 0      |
| Thauera                | 1              | 111            | 0      | 0      | 0      | 0      | 0      | 0      | 0      | 1      | 0      | 0      | 1      | 0      | 0      | 0      | 0      | 0      | 0      |
| Thermacetogenium       | 1              | 7              | 0      | 0      | 0      | 0      | 0      | 0      | 0      | 0      | 0      | 0      | 0      | 0      | 0      | 0      | 0      | 0      | 0      |
| Thermaerobacter        | 2              | 79             | 0      | 0      | 0      | 0      | 0      | 0      | 0      | 0      | 0      | 0      | 0      | 0      | 0      | 0      | 0      | 0      | 0      |
| Thermanaerovibrio      | 2              | 58             | 0      | 0      | 0      | 0      | 0      | 0      | 0      | 0      | 0      | 0      | 0      | 0      | 0      | 0      | 0      | 0      | 0      |
| Thermincola            | 2              | 62             | 0      | 0      | 0      | 0      | 0      | 0      | 0      | 0      | 0      | 0      | 0      | 0      | 0      | 0      | 0      | 0      | 0      |
| Thermoanaerobacter     | 2              | 76             | 0      | 0      | 0      | 0      | 0      | 0      | 0      | 0      | 0      | 0      | 0      | 0      | 0      | 0      | 0      | 0      | 0      |
| Thermoanaerobacterium  | 2              | 64             | 0      | 0      | 0      | 0      | 0      | 0      | 0      | 0      | 0      | 0      | 0      | 0      | 0      | 0      | 0      | 0      | 0      |
| Thermobacillus         | 1              | 11             | 0      | 0      | 0      | 0      | 0      | 0      | 0      | 0      | 0      | 0      | 0      | 0      | 0      | 0      | 0      | 0      | 0      |
| Thermobaculum          | 2              | 62             | 0      | 0      | 0      | 0      | 0      | 0      | 0      | 0      | 0      | 0      | 0      | 0      | 0      | 0      | 0      | 0      | 0      |
| Thermobifida           | 2              | 72             | 0      | 0      | 0      | 0      | 0      | 0      | 0      | 0      | 0      | 0      | 0      | 0      | 0      | 0      | 0      | 0      | 0      |
| Thermobispora          | 2              | 109            | 0      | 0      | 1      | 0      | 0      | 0      | 0      | 0      | 0      | 0      | 0      | 0      | 0      | 0      | 0      | 0      | 0      |
| Thermococcus           | 1              | 13             | 0      | 0      | 0      | 0      | 0      | 0      | 0      | 0      | 0      | 0      | 0      | 0      | 0      | 0      | 0      | 0      | 0      |
| Thermocrinis           | 2              | 60             | 0      | 0      | 0      | 0      | 0      | 0      | 0      | 0      | 0      | 0      | 0      | 0      | 0      | 0      | 0      | 0      | 0      |
| Thermodesulfator       | 1              | 10             | 0      | 0      | 0      | 0      | 0      | 0      | 0      | 0      | 0      | 0      | 0      | 0      | 0      | 0      | 0      | 0      | 0      |
| Thermodesulfobacterium | 1              | 9              | 0      | 0      | 0      | 0      | 0      | 0      | 0      | 0      | 0      | 0      | 0      | 0      | 0      | 0      | 0      | 0      | 0      |

| Genus                       | Cluster Number | Protein Counts | K15982 | K16045 | K16047 | K16049 | K16050 | K16051 | K16173 | K16249 | K16269 | K16270 | K16514 | K16873 | K16874 | K16876 | K16880 | K17067 | K17070 |
|-----------------------------|----------------|----------------|--------|--------|--------|--------|--------|--------|--------|--------|--------|--------|--------|--------|--------|--------|--------|--------|--------|
| <b>Thermodesulfobium</b>    | 1              | 13             | 0      | 0      | 0      | 0      | 0      | 0      | 0      | 0      | 0      | 0      | 0      | 0      | 0      | 0      | 0      | 0      | 0      |
| <b>Thermodesulfovibrio</b>  | 2              | 60             | 0      | 0      | 0      | 0      | 0      | 0      | 0      | 0      | 0      | 0      | 0      | 0      | 0      | 0      | 0      | 0      | 0      |
| <b>Thermofilum</b>          | 1              | 9              | 0      | 0      | 0      | 0      | 0      | 0      | 0      | 0      | 0      | 0      | 0      | 0      | 0      | 0      | 0      | 0      | 0      |
| <b>Thermogladus</b>         | 1              | 7              | 0      | 0      | 0      | 0      | 0      | 0      | 0      | 0      | 0      | 0      | 0      | 0      | 0      | 0      | 0      | 0      | 0      |
| <b>Thermomicrobium</b>      | 2              | 92             | 0      | 0      | 0      | 0      | 0      | 0      | 0      | 0      | 0      | 0      | 0      | 0      | 0      | 0      | 0      | 0      | 0      |
| <b>Thermomonospora</b>      | 2              | 125            | 1      | 0      | 1      | 0      | 0      | 1      | 0      | 0      | 0      | 0      | 0      | 0      | 0      | 0      | 0      | 0      | 0      |
| <b>Thermoplasma</b>         | 1              | 11             | 0      | 0      | 0      | 0      | 0      | 0      | 0      | 0      | 0      | 0      | 0      | 0      | 0      | 0      | 0      | 0      | 0      |
| <b>Thermoplasmatales</b>    | 1              | 6              | 0      | 0      | 0      | 0      | 0      | 0      | 0      | 0      | 0      | 0      | 0      | 0      | 0      | 0      | 0      | 0      | 0      |
| <b>Thermoproteus</b>        | 1              | 12             | 0      | 0      | 0      | 0      | 0      | 0      | 0      | 0      | 0      | 0      | 0      | 0      | 0      | 0      | 0      | 0      | 0      |
| <b>Thermosediminibacter</b> | 2              | 64             | 0      | 0      | 0      | 0      | 0      | 0      | 0      | 0      | 0      | 0      | 0      | 0      | 0      | 0      | 0      | 0      | 0      |
| <b>Thermosipho</b>          | 2              | 70             | 0      | 0      | 0      | 0      | 0      | 0      | 0      | 0      | 0      | 0      | 0      | 0      | 0      | 0      | 0      | 0      | 0      |
| <b>Thermosphaera</b>        | 1              | 10             | 0      | 0      | 0      | 0      | 0      | 0      | 0      | 0      | 0      | 0      | 0      | 0      | 0      | 0      | 0      | 0      | 0      |
| <b>Thermosynechococcus</b>  | 1              | 6              | 0      | 0      | 0      | 0      | 0      | 0      | 0      | 0      | 0      | 0      | 0      | 0      | 0      | 0      | 0      | 0      | 0      |
| <b>Thermotoga</b>           | 2              | 80             | 0      | 0      | 0      | 0      | 0      | 0      | 0      | 0      | 0      | 0      | 0      | 0      | 0      | 0      | 0      | 0      | 0      |
| <b>Thermovibrio</b>         | 2              | 58             | 0      | 0      | 0      | 0      | 0      | 0      | 0      | 0      | 0      | 0      | 0      | 0      | 0      | 0      | 0      | 0      | 0      |
| <b>Thermovirga</b>          | 1              | 9              | 0      | 0      | 0      | 0      | 0      | 0      | 0      | 0      | 0      | 0      | 0      | 0      | 0      | 0      | 0      | 0      | 0      |
| <b>Thermus</b>              | 2              | 107            | 0      | 0      | 0      | 0      | 0      | 0      | 0      | 0      | 0      | 0      | 0      | 0      | 0      | 0      | 0      | 0      | 0      |
| <b>Thioalkalimicrobium</b>  | 1              | 4              | 0      | 0      | 0      | 0      | 0      | 0      | 0      | 0      | 0      | 0      | 0      | 0      | 0      | 0      | 0      | 0      | 0      |
| <b>Thioalkalivibrio</b>     | 2              | 91             | 0      | 0      | 0      | 0      | 0      | 0      | 0      | 0      | 0      | 0      | 0      | 0      | 0      | 0      | 0      | 0      | 0      |
| <b>Thiobaca</b>             | 1              | 2              | 0      | 0      | 0      | 0      | 0      | 0      | 0      | 0      | 0      | 0      | 0      | 0      | 0      | 0      | 0      | 0      | 0      |
| <b>Thiobacillus</b>         | 2              | 67             | 0      | 0      | 0      | 0      | 0      | 0      | 0      | 0      | 0      | 0      | 0      | 0      | 0      | 0      | 0      | 0      | 0      |
| <b>Thiocapsa</b>            | 1              | 2              | 0      | 0      | 0      | 0      | 0      | 0      | 0      | 0      | 0      | 0      | 0      | 0      | 0      | 0      | 0      | 0      | 0      |
| <b>Thiocystis</b>           | 1              | 11             | 0      | 0      | 0      | 0      | 0      | 0      | 0      | 0      | 0      | 0      | 0      | 0      | 0      | 0      | 0      | 0      | 0      |
| <b>Thioflavococcus</b>      | 1              | 13             | 0      | 0      | 0      | 0      | 0      | 0      | 0      | 0      | 0      | 0      | 0      | 0      | 0      | 0      | 0      | 0      | 0      |
| <b>Thiomicrospira</b>       | 2              | 50             | 0      | 0      | 0      | 0      | 0      | 0      | 0      | 0      | 0      | 0      | 0      | 0      | 0      | 0      | 0      | 0      | 0      |
| <b>Thiomonas</b>            | 2              | 85             | 0      | 0      | 0      | 0      | 0      | 0      | 0      | 0      | 0      | 0      | 0      | 0      | 0      | 0      | 0      | 0      | 0      |
| <b>Thiorhodococcus</b>      | 1              | 2              | 0      | 0      | 0      | 0      | 0      | 0      | 0      | 0      | 0      | 0      | 0      | 0      | 0      | 0      | 0      | 0      | 0      |
| <b>Thiothrix</b>            | 1              | 2              | 0      | 0      | 0      | 0      | 0      | 0      | 0      | 0      | 0      | 0      | 0      | 0      | 0      | 0      | 0      | 0      | 0      |
| <b>Tistrella</b>            | 1              | 42             | 0      | 0      | 0      | 0      | 0      | 0      | 0      | 0      | 0      | 0      | 0      | 0      | 0      | 0      | 0      | 0      | 0      |
| <b>Tolumonas</b>            | 2              | 100            | 0      | 0      | 0      | 0      | 0      | 0      | 0      | 0      | 0      | 0      | 0      | 0      | 0      | 0      | 0      | 0      | 0      |
| <b>Transposon</b>           | 1              | 2              | 0      | 0      | 0      | 0      | 0      | 0      | 0      | 0      | 0      | 0      | 0      | 0      | 0      | 0      | 0      | 0      | 0      |
| <b>Treponema</b>            | 1              | 63             | 0      | 0      | 0      | 0      | 0      | 0      | 0      | 0      | 0      | 0      | 0      | 0      | 0      | 0      | 0      | 0      | 0      |
| <b>Trichodesmium</b>        | 2              | 71             | 0      | 0      | 0      | 0      | 0      | 0      | 0      | 0      | 0      | 0      | 0      | 0      | 0      | 0      | 0      | 0      | 0      |
| <b>Trichormus</b>           | 1              | 12             | 0      | 0      | 0      | 0      | 0      | 0      | 0      | 0      | 0      | 0      | 0      | 0      | 0      | 0      | 0      | 0      | 0      |
| <b>Tropheryma</b>           | 2              | 22             | 0      | 0      | 0      | 0      | 0      | 0      | 0      | 0      | 0      | 0      | 0      | 0      | 0      | 0      | 0      | 0      | 0      |
| <b>Truepera</b>             | 2              | 104            | 0      | 0      | 0      | 0      | 0      | 0      | 0      | 0      | 0      | 0      | 0      | 0      | 0      | 0      | 0      | 0      | 0      |
| <b>Tsukamurella</b>         | 2              | 123            | 1      | 0      | 1      | 1      | 1      | 1      | 0      | 0      | 0      | 0      | 0      | 0      | 0      | 0      | 0      | 0      | 0      |
| <b>Turneriella</b>          | 1              | 16             | 0      | 0      | 0      | 0      | 0      | 0      | 0      | 0      | 0      | 0      | 0      | 0      | 0      | 0      | 0      | 0      | 0      |
| <b>Uliginosibacterium</b>   | 1              | 2              | 0      | 0      | 0      | 0      | 0      | 0      | 0      | 0      | 0      | 0      | 0      | 0      | 0      | 0      | 0      | 0      | 0      |
| <b>Ureaplasma</b>           | 1              | 24             | 0      | 0      | 0      | 0      | 0      | 0      | 0      | 0      | 0      | 0      | 0      | 0      | 0      | 0      | 0      | 0      | 0      |
| <b>Ureibacillus</b>         | 1              | 2              | 0      | 0      | 0      | 0      | 0      | 0      | 0      | 0      | 0      | 0      | 0      | 0      | 0      | 0      | 0      | 0      | 0      |
| <b>Variovorax</b>           | 3              | 187            | 0      | 0      | 0      | 0      | 0      | 0      | 0      | 0      | 0      | 0      | 0      | 0      | 0      | 0      | 0      | 0      | 0      |
| <b>Veillonella</b>          | 1              | 54             | 0      | 0      | 0      | 0      | 0      | 0      | 0      | 0      | 0      | 0      | 0      | 0      | 0      | 0      | 0      | 0      | 0      |
| <b>Verminephrobacter</b>    | 3              | 188            | 0      | 0      | 0      | 0      | 0      | 0      | 0      | 1      | 0      | 0      | 0      | 0      | 0      | 0      | 0      | 0      | 0      |
| <b>Verrucosispora</b>       | 3              | 126            | 0      | 0      | 0      | 0      | 0      | 0      | 0      | 0      | 0      | 0      | 0      | 0      | 0      | 0      | 0      | 0      | 0      |
| <b>Vibrio</b>               | 2              | 195            | 0      | 0      | 0      | 0      | 0      | 0      | 0      | 0      | 0      | 0      | 1      | 0      | 0      | 0      | 0      | 0      | 0      |
| <b>Vibrionales</b>          | 1              | 46             | 0      | 0      | 0      | 0      | 0      | 0      | 0      | 0      | 0      | 0      | 0      | 0      | 0      | 0      | 0      | 0      | 0      |
| <b>Vitreoscilla</b>         | 1              | 1              | 0      | 0      | 0      | 0      | 0      | 0      | 0      | 0      | 0      | 0      | 0      | 0      | 0      | 0      | 0      | 0      | 0      |
| <b>Vulcanisaeta</b>         | 1              | 14             | 0      | 0      | 0      | 0      | 0      | 0      | 0      | 0      | 0      | 0      | 0      | 0      | 0      | 0      | 0      | 0      | 0      |
| <b>Waddlia</b>              | 2              | 68             | 0      | 0      | 0      | 0      | 0      | 0      | 0      | 0      | 0      | 0      | 0      | 0      | 0      | 0      | 0      | 0      | 0      |
| <b>Wautersia</b>            | 1              | 2              | 0      | 0      | 0      | 0      | 0      | 0      | 0      | 0      | 0      | 0      | 0      | 0      | 0      | 0      | 0      | 0      | 0      |
| <b>Weeksella</b>            | 2              | 65             | 0      | 0      | 0      | 0      | 0      | 0      | 0      | 0      | 0      | 0      | 0      | 0      | 0      | 0      | 0      | 0      | 0      |

| Genus             | Cluster Number | Protein Counts | K15982 | K16045 | K16047 | K16049 | K16050 | K16051 | K16173 | K16249 | K16269 | K16270 | K16514 | K16873 | K16874 | K16876 | K16880 | K17067 | K17070 |
|-------------------|----------------|----------------|--------|--------|--------|--------|--------|--------|--------|--------|--------|--------|--------|--------|--------|--------|--------|--------|--------|
| Weissella         | 1              | 14             | 0      | 0      | 0      | 0      | 0      | 0      | 0      | 0      | 0      | 0      | 0      | 0      | 0      | 0      | 0      | 0      | 0      |
| Wenxinia          | 1              | 2              | 0      | 0      | 0      | 0      | 0      | 0      | 0      | 0      | 0      | 0      | 0      | 0      | 0      | 0      | 0      | 0      | 0      |
| Wigglesworthia    | 1              | 29             | 0      | 0      | 0      | 0      | 0      | 0      | 0      | 0      | 0      | 0      | 0      | 0      | 0      | 0      | 0      | 0      | 0      |
| Wolbachia         | 1              | 32             | 0      | 0      | 0      | 0      | 0      | 0      | 0      | 0      | 0      | 0      | 0      | 0      | 0      | 0      | 0      | 0      | 0      |
| Wolinella         | 2              | 51             | 0      | 0      | 0      | 0      | 0      | 0      | 0      | 0      | 0      | 0      | 0      | 0      | 0      | 0      | 0      | 0      | 0      |
| Xanthobacter      | 3              | 176            | 0      | 0      | 1      | 0      | 0      | 0      | 0      | 0      | 0      | 0      | 0      | 0      | 0      | 0      | 0      | 0      | 0      |
| Xanthobacteraceae | 1              | 4              | 0      | 0      | 0      | 0      | 0      | 0      | 0      | 0      | 0      | 0      | 0      | 0      | 0      | 0      | 0      | 0      | 0      |
| Xanthomonadaceae  | 1              | 39             | 0      | 0      | 0      | 0      | 0      | 0      | 0      | 0      | 0      | 0      | 0      | 0      | 0      | 0      | 0      | 0      | 0      |
| Xanthomonas       | 2              | 162            | 0      | 0      | 0      | 0      | 0      | 0      | 0      | 0      | 0      | 0      | 1      | 0      | 0      | 0      | 0      | 0      | 0      |
| Xenorhabdus       | 2              | 127            | 0      | 0      | 0      | 0      | 0      | 0      | 0      | 0      | 0      | 0      | 0      | 0      | 0      | 0      | 0      | 0      | 0      |
| Xylanimonas       | 2              | 66             | 0      | 0      | 0      | 0      | 0      | 0      | 0      | 0      | 0      | 0      | 0      | 0      | 0      | 0      | 0      | 0      | 0      |
| Xylella           | 2              | 52             | 0      | 0      | 0      | 0      | 0      | 0      | 0      | 0      | 0      | 0      | 0      | 0      | 0      | 0      | 0      | 0      | 0      |
| Yersinia          | 2              | 145            | 0      | 0      | 0      | 0      | 0      | 0      | 0      | 0      | 0      | 0      | 0      | 0      | 0      | 0      | 0      | 0      | 0      |
| Yokenella         | 2              | 61             | 0      | 0      | 0      | 0      | 0      | 0      | 0      | 0      | 0      | 0      | 0      | 0      | 0      | 0      | 0      | 0      | 0      |
| Zobellia          | 1              | 28             | 0      | 0      | 0      | 0      | 0      | 0      | 0      | 0      | 0      | 0      | 0      | 0      | 0      | 0      | 0      | 0      | 0      |
| Zunongwangia      | 2              | 98             | 0      | 0      | 0      | 0      | 0      | 0      | 0      | 0      | 0      | 0      | 0      | 0      | 0      | 0      | 0      | 0      | 0      |
| Zymomonas         | 2              | 67             | 0      | 0      | 0      | 0      | 0      | 0      | 0      | 0      | 0      | 0      | 0      | 0      | 0      | 0      | 0      | 0      | 0      |
| Zymophilus        | 1              | 2              | 0      | 0      | 0      | 0      | 0      | 0      | 0      | 0      | 0      | 0      | 0      | 0      | 0      | 0      | 0      | 0      | 0      |
