# Supplementary material for: Xenobiotic Metabolism and Gut Microbiomes
Source: PubMed Central journal article supplement (PMC5047465; doi:10.1371/journal.pone.0163099), 2016-10-03
Supplement: pone.0163099.s024.pdf [file pone.0163099.s024.pdf]

| EC/KO       | AM-AD-10 | AM-AD-11 | AM-AD-12 | AM-AD-13 | AM-AD-14 | AM-AD-15 | AM-AD-16 | AM-AD-17 | AM-AD-18 | AM-AD-19 | AM-AD-20 | AM-AD-21 | AM-AD-22 | AM-AD-23 | AM-AD-24 | AM-AD-25 | AM-AD-26 | AM-AD-27 |
|-------------|----------|----------|----------|----------|----------|----------|----------|----------|----------|----------|----------|----------|----------|----------|----------|----------|----------|----------|
| 1.1.1.-     | 67       | 71       | 79       | 52       | 93       | 79       | 86       | 37       | 104      | 60       | 84       | 92       | 78       | 46       | 69       | 33       | 42       | 84       |
| 1.1.1.1     | 55       | 65       | 70       | 41       | 63       | 53       | 75       | 31       | 64       | 38       | 61       | 56       | 50       | 28       | 36       | 11       | 19       | 36       |
| 1.1.1.157   | 2        | 3        | 3        | 2        | 5        | 1        | 2        | 0        | 1        | 4        | 1        | 5        | 1        | 2        | 2        | 1        | 0        | 2        |
| 1.1.1.205   | 40       | 39       | 40       | 22       | 35       | 30       | 39       | 18       | 38       | 25       | 34       | 33       | 38       | 17       | 25       | 11       | 11       | 25       |
| 1.1.1.35    | 2        | 4        | 5        | 3        | 8        | 5        | 5        | 2        | 3        | 3        | 6        | 4        | 4        | 1        | 0        | 0        | 1        | 3        |
| 1.1.2.99.6  | 0        | 0        | 1        | 2        | 1        | 1        | 2        | 2        | 2        | 2        | 1        | 2        | 3        | 1        | 3        | 3        | 1        | 3        |
| 1.1.3.11.-  | 0        | 0        | 0        | 0        | 0        | 0        | 0        | 0        | 0        | 0        | 0        | 0        | 0        | 0        | 0        | 0        | 0        | 0        |
| 1.1.3.11.1  | 0        | 0        | 0        | 0        | 0        | 0        | 0        | 0        | 0        | 0        | 0        | 0        | 0        | 0        | 0        | 0        | 0        | 0        |
| 1.1.3.11.2  | 0        | 0        | 0        | 0        | 0        | 0        | 0        | 0        | 0        | 0        | 0        | 0        | 0        | 0        | 0        | 0        | 0        | 0        |
| 1.1.3.11.3  | 0        | 0        | 0        | 0        | 0        | 0        | 0        | 0        | 0        | 0        | 0        | 0        | 0        | 0        | 0        | 0        | 0        | 0        |
| 1.1.3.11.39 | 0        | 0        | 0        | 0        | 0        | 0        | 0        | 0        | 0        | 0        | 0        | 0        | 0        | 0        | 0        | 0        | 0        | 0        |
| 1.1.3.11.5  | 0        | 0        | 0        | 0        | 0        | 0        | 0        | 0        | 0        | 1        | 0        | 0        | 0        | 0        | 0        | 1        | 0        | 0        |
| 1.1.3.11.8  | 0        | 0        | 0        | 0        | 0        | 0        | 0        | 0        | 0        | 0        | 0        | 0        | 0        | 0        | 0        | 0        | 0        | 0        |
| 1.1.4.12.10 | 0        | 0        | 0        | 0        | 0        | 0        | 0        | 0        | 0        | 0        | 0        | 0        | 0        | 0        | 0        | 0        | 0        | 0        |
| 1.1.4.12.13 | 0        | 0        | 0        | 0        | 0        | 0        | 0        | 0        | 0        | 0        | 0        | 0        | 0        | 0        | 0        | 0        | 0        | 0        |
| 1.1.4.12.18 | 0        | 0        | 0        | 0        | 0        | 0        | 0        | 0        | 0        | 0        | 0        | 0        | 0        | 0        | 0        | 0        | 0        | 0        |
| 1.1.4.13.-  | 1        | 2        | 1        | 1        | 1        | 3        | 1        | 0        | 0        | 1        | 1        | 0        | 1        | 0        | 0        | 0        | 0        | 0        |
| 1.1.4.13.1  | 0        | 0        | 0        | 0        | 0        | 0        | 0        | 0        | 0        | 0        | 0        | 0        | 0        | 0        | 0        | 0        | 0        | 0        |
| 1.1.4.13.2  | 0        | 0        | 0        | 0        | 0        | 0        | 0        | 0        | 0        | 0        | 0        | 0        | 0        | 0        | 0        | 0        | 0        | 0        |
| 1.1.4.13.50 | 0        | 0        | 0        | 0        | 0        | 0        | 0        | 0        | 0        | 0        | 0        | 0        | 0        | 0        | 0        | 0        | 0        | 0        |
| 1.1.4.13.7  | 2        | 0        | 0        | 0        | 0        | 0        | 0        | 1        | 0        | 0        | 0        | 0        | 1        | 0        | 0        | 0        | 0        | 0        |
| 1.1.4.13.8  | 0        | 0        | 0        | 0        | 0        | 0        | 0        | 0        | 0        | 0        | 0        | 0        | 0        | 0        | 0        | 0        | 0        | 0        |
| 1.1.4.13.82 | 0        | 0        | 0        | 0        | 0        | 0        | 0        | 0        | 0        | 0        | 0        | 0        | 0        | 0        | 1        | 0        | 0        | 0        |
| 1.1.4.99.-  | 0        | 0        | 0        | 0        | 0        | 0        | 0        | 0        | 0        | 0        | 0        | 0        | 0        | 0        | 0        | 0        | 0        | 0        |
| 1.1.7.99.1  | 0        | 0        | 0        | 0        | 0        | 0        | 0        | 0        | 0        | 0        | 0        | 0        | 0        | 0        | 0        | 0        | 0        | 0        |
| 1.1.8.6.1   | 0        | 0        | 1        | 1        | 1        | 0        | 0        | 0        | 0        | 0        | 0        | 0        | 1        | 0        | 0        | 0        | 0        | 0        |
| 1.2.1.-     | 0        | 0        | 0        | 0        | 0        | 0        | 0        | 0        | 0        | 0        | 0        | 0        | 0        | 0        | 0        | 0        | 0        | 0        |
| 1.2.1.10    | 8        | 9        | 5        | 5        | 7        | 9        | 9        | 4        | 10       | 3        | 12       | 6        | 4        | 4        | 3        | 0        | 3        | 7        |
| 1.2.1.3     | 10       | 9        | 14       | 6        | 20       | 12       | 11       | 3        | 15       | 11       | 12       | 18       | 16       | 7        | 7        | 4        | 2        | 14       |
| 1.2.1.39    | 0        | 0        | 0        | 0        | 0        | 0        | 0        | 0        | 0        | 0        | 0        | 0        | 0        | 0        | 0        | 0        | 0        | 0        |
| 1.2.7.1     | 20       | 20       | 21       | 18       | 26       | 17       | 24       | 11       | 19       | 18       | 13       | 27       | 25       | 17       | 15       | 9        | 8        | 24       |
| 1.2.99.2    | 7        | 6        | 8        | 1        | 9        | 10       | 7        | 2        | 9        | 1        | 10       | 3        | 4        | 2        | 1        | 0        | 0        | 4        |
| 1.3.1.-     | 0        | 0        | 0        | 0        | 1        | 0        | 0        | 0        | 0        | 0        | 0        | 1        | 0        | 0        | 1        | 1        | 0        | 0        |
| 1.3.1.2     | 0        | 1        | 3        | 1        | 0        | 0        | 3        | 2        | 2        | 1        | 0        | 1        | 0        | 0        | 1        | 1        | 1        | 2        |
| 1.3.1.25    | 0        | 0        | 0        | 0        | 0        | 0        | 0        | 0        | 0        | 0        | 0        | 0        | 0        | 0        | 0        | 0        | 0        | 0        |
| 1.3.99.-    | 0        | 0        | 0        | 0        | 0        | 1        | 0        | 0        | 0        | 0        | 0        | 0        | 0        | 1        | 0        | 0        | 0        | 0        |
| 1.6.5.-     | 68       | 54       | 75       | 63       | 79       | 63       | 82       | 35       | 66       | 44       | 48       | 80       | 77       | 53       | 73       | 24       | 54       | 74       |
| 1.7.1.-     | 16       | 16       | 15       | 12       | 17       | 10       | 18       | 8        | 12       | 12       | 12       | 13       | 20       | 8        | 12       | 6        | 10       | 16       |
| 1.8.99.3    | 0        | 0        | 0        | 1        | 0        | 0        | 0        | 0        | 0        | 0        | 1        | 1        | 2        | 0        | 2        | 0        | 0        | 1        |
| 2.1.1.-     | 430      | 452      | 469      | 291      | 484      | 405      | 479      | 185      | 425      | 251      | 427      | 494      | 458      | 306      | 251      | 121      | 192      | 390      |
| 2.3.1.-     | 278      | 245      | 266      | 176      | 285      | 201      | 253      | 128      | 262      | 184      | 184      | 295      | 292      | 189      | 188      | 117      | 120      | 249      |
| 2.3.1.16    | 2        | 1        | 1        | 1        | 2        | 3        | 4        | 1        | 5        | 2        | 1        | 3        | 3        | 2        | 0        | 0        | 0        | 0        |
| 2.3.1.5     | 0        | 0        | 0        | 0        | 0        | 0        | 0        | 0        | 0        | 0        | 0        | 0        | 0        | 0        | 0        | 0        | 0        | 0        |
| 2.3.1.9     | 0        | 1        | 1        | 2        | 2        | 1        | 2        | 2        | 2        | 1        | 3        | 2        | 0        | 1        | 1        | 0        | 1        | 2        |
| 2.4.2.10    | 17       | 23       | 23       | 20       | 28       | 25       | 24       | 10       | 29       | 18       | 14       | 24       | 23       | 19       | 6        | 5        | 8        | 19       |
| 2.4.2.3     | 17       | 16       | 14       | 7        | 16       | 14       | 19       | 3        | 20       | 12       | 11       | 15       | 17       | 10       | 6        | 2        | 5        | 15       |
| 2.4.2.4     | 15       | 13       | 8        | 3        | 5        | 4        | 10       | 2        | 5        | 1        | 9        | 9        | 9        | 4        | 2        | 0        | 1        | 9        |
| 2.4.2.8     | 28       | 25       | 19       | 14       | 21       | 22       | 19       | 9        | 26       | 12       | 24       | 23       | 22       | 12       | 11       | 3        | 9        | 20       |
| 2.5.1.-     | 27       | 30       | 28       | 28       | 28       | 25       | 41       | 20       | 27       | 21       | 21       | 36       | 38       | 19       | 25       | 22       | 22       | 26       |

| EC/KO    | AM-AD-10 | AM-AD-11 | AM-AD-12 | AM-AD-13 | AM-AD-14 | AM-AD-15 | AM-AD-16 | AM-AD-17 | AM-AD-18 | AM-AD-19 | AM-AD-20 | AM-AD-21 | AM-AD-22 | AM-AD-23 | AM-AD-24 | AM-AD-25 | AM-AD-26 | AM-AD-27 |
|----------|----------|----------|----------|----------|----------|----------|----------|----------|----------|----------|----------|----------|----------|----------|----------|----------|----------|----------|
| 2.5.1.18 | 1        | 1        | 0        | 0        | 2        | 0        | 2        | 0        | 5        | 3        | 2        | 0        | 2        | 0        | 0        | 0        | 0        | 2        |
| 2.6.1.-  | 71       | 42       | 55       | 26       | 64       | 39       | 59       | 27       | 57       | 40       | 42       | 57       | 53       | 46       | 41       | 19       | 28       | 51       |
| 2.7.1.21 | 17       | 8        | 9        | 9        | 10       | 8        | 8        | 3        | 10       | 9        | 6        | 10       | 20       | 6        | 9        | 8        | 8        | 12       |
| 2.7.1.48 | 60       | 56       | 57       | 41       | 56       | 35       | 64       | 21       | 43       | 40       | 46       | 58       | 62       | 31       | 41       | 17       | 25       | 54       |
| 2.7.4.-  | 33       | 26       | 29       | 22       | 32       | 22       | 30       | 10       | 20       | 18       | 23       | 21       | 25       | 21       | 18       | 8        | 13       | 31       |
| 2.8.3.-  | 2        | 2        | 1        | 0        | 4        | 4        | 1        | 1        | 3        | 0        | 0        | 2        | 3        | 0        | 1        | 0        | 0        | 3        |
| 2.8.3.1  | 0        | 2        | 0        | 0        | 0        | 1        | 2        | 1        | 3        | 0        | 0        | 1        | 0        | 0        | 0        | 0        | 0        | 0        |
| 2.8.3.12 | 2        | 1        | 0        | 0        | 0        | 1        | 2        | 0        | 0        | 1        | 0        | 2        | 0        | 0        | 0        | 2        | 2        | 0        |
| 2.8.3.6  | 2        | 0        | 2        | 1        | 1        | 2        | 0        | 0        | 1        | 0        | 0        | 0        | 0        | 0        | 3        | 1        | 1        | 0        |
| 2.8.3.8  | 3        | 1        | 3        | 1        | 2        | 4        | 2        | 0        | 7        | 2        | 3        | 5        | 2        | 2        | 3        | 0        | 1        | 2        |
| 3.1.1.-  | 11       | 7        | 9        | 4        | 9        | 6        | 9        | 1        | 4        | 7        | 7        | 12       | 3        | 10       | 8        | 2        | 2        | 9        |
| 3.1.1.1  | 8        | 4        | 13       | 7        | 8        | 6        | 13       | 4        | 14       | 10       | 7        | 9        | 14       | 9        | 9        | 6        | 3        | 10       |
| 3.1.1.17 | 2        | 1        | 3        | 0        | 3        | 2        | 3        | 0        | 7        | 1        | 2        | 4        | 1        | 1        | 3        | 3        | 2        | 4        |
| 3.1.1.2  | 0        | 1        | 0        | 0        | 2        | 0        | 1        | 0        | 1        | 0        | 0        | 1        | 0        | 1        | 0        | 0        | 0        | 0        |
| 3.1.1.24 | 5        | 5        | 6        | 1        | 6        | 7        | 3        | 3        | 2        | 0        | 2        | 3        | 1        | 2        | 1        | 1        | 2        | 3        |
| 3.1.1.45 | 0        | 0        | 0        | 0        | 0        | 0        | 0        | 0        | 0        | 0        | 0        | 0        | 0        | 0        | 0        | 0        | 0        | 0        |
| 3.1.2.-  | 1        | 1        | 2        | 1        | 0        | 0        | 0        | 0        | 0        | 0        | 3        | 0        | 0        | 0        | 1        | 0        | 0        | 1        |
| 3.1.2.23 | 9        | 7        | 7        | 9        | 9        | 3        | 6        | 6        | 3        | 8        | 2        | 13       | 12       | 6        | 12       | 10       | 8        | 8        |
| 3.1.3.1  | 18       | 16       | 30       | 19       | 14       | 14       | 21       | 18       | 18       | 30       | 12       | 26       | 35       | 15       | 26       | 21       | 17       | 30       |
| 3.1.3.2  | 3        | 3        | 7        | 3        | 3        | 4        | 7        | 2        | 4        | 3        | 6        | 9        | 6        | 3        | 4        | 5        | 5        | 7        |
| 3.1.3.41 | 0        | 0        | 0        | 0        | 0        | 0        | 0        | 0        | 0        | 0        | 1        | 0        | 0        | 0        | 0        | 0        | 0        | 0        |
| 3.2.1.31 | 3        | 7        | 6        | 4        | 10       | 3        | 8        | 5        | 5        | 4        | 5        | 2        | 9        | 5        | 1        | 0        | 1        | 3        |
| 3.3.2.9  | 0        | 0        | 0        | 0        | 0        | 0        | 0        | 0        | 0        | 0        | 0        | 0        | 0        | 0        | 0        | 0        | 0        | 0        |
| 3.5.1.-  | 42       | 36       | 35       | 25       | 56       | 32       | 41       | 13       | 37       | 28       | 45       | 47       | 35       | 30       | 21       | 5        | 14       | 44       |
| 3.5.1.4  | 5        | 5        | 4        | 2        | 1        | 3        | 2        | 0        | 3        | 1        | 4        | 1        | 2        | 1        | 2        | 1        | 1        | 2        |
| 3.5.1.5  | 6        | 1        | 3        | 1        | 4        | 6        | 4        | 2        | 3        | 1        | 6        | 1        | 4        | 3        | 2        | 1        | 0        | 2        |
| 3.5.1.54 | 2        | 4        | 6        | 1        | 7        | 1        | 8        | 3        | 4        | 7        | 7        | 5        | 4        | 5        | 2        | 1        | 1        | 4        |
| 3.5.1.6  | 2        | 1        | 4        | 2        | 1        | 3        | 4        | 2        | 2        | 3        | 4        | 0        | 2        | 1        | 1        | 1        | 0        | 2        |
| 3.5.2.-  | 0        | 0        | 0        | 0        | 0        | 0        | 0        | 0        | 0        | 0        | 0        | 0        | 0        | 0        | 0        | 0        | 0        | 0        |
| 3.5.2.2  | 0        | 2        | 3        | 0        | 4        | 2        | 5        | 0        | 4        | 1        | 2        | 1        | 2        | 2        | 2        | 0        | 1        | 2        |
| 3.5.4.-  | 45       | 42       | 34       | 28       | 42       | 37       | 32       | 17       | 36       | 22       | 27       | 43       | 48       | 28       | 29       | 19       | 22       | 43       |
| 3.5.4.5  | 33       | 20       | 26       | 18       | 34       | 18       | 28       | 10       | 29       | 13       | 20       | 28       | 30       | 14       | 15       | 9        | 15       | 27       |
| 3.5.5.1  | 0        | 0        | 0        | 2        | 1        | 1        | 0        | 0        | 3        | 1        | 0        | 3        | 1        | 0        | 0        | 1        | 0        | 2        |
| 3.5.5.7  | 0        | 0        | 0        | 0        | 0        | 0        | 0        | 0        | 0        | 0        | 0        | 0        | 0        | 0        | 0        | 0        | 0        | 0        |
| 3.5.99.3 | 0        | 0        | 0        | 0        | 0        | 0        | 0        | 0        | 0        | 0        | 0        | 0        | 0        | 0        | 0        | 0        | 0        | 0        |
| 3.6.1.7  | 5        | 7        | 10       | 5        | 10       | 11       | 15       | 2        | 6        | 3        | 15       | 8        | 8        | 9        | 2        | 0        | 1        | 5        |
| 3.7.1.-  | 1        | 1        | 1        | 0        | 1        | 1        | 0        | 1        | 4        | 0        | 1        | 2        | 0        | 1        | 1        | 0        | 0        | 0        |
| 3.7.1.2  | 4        | 4        | 9        | 5        | 2        | 3        | 10       | 6        | 4        | 4        | 4        | 5        | 8        | 6        | 6        | 3        | 5        | 7        |
| 3.8.1.2  | 9        | 13       | 11       | 9        | 7        | 7        | 14       | 4        | 10       | 6        | 9        | 10       | 9        | 5        | 10       | 3        | 8        | 9        |
| 3.8.1.3  | 0        | 0        | 0        | 0        | 0        | 0        | 0        | 0        | 0        | 0        | 0        | 0        | 0        | 0        | 1        | 0        | 0        | 0        |
| 3.8.1.5  | 2        | 1        | 0        | 0        | 1        | 0        | 1        | 0        | 1        | 0        | 0        | 0        | 1        | 0        | 0        | 0        | 0        | 0        |
| 4.1.1.-  | 14       | 15       | 16       | 14       | 14       | 22       | 15       | 10       | 24       | 18       | 12       | 18       | 16       | 15       | 14       | 14       | 8        | 10       |
| 4.1.1.44 | 53       | 53       | 43       | 28       | 49       | 43       | 41       | 20       | 42       | 26       | 36       | 49       | 53       | 33       | 43       | 16       | 24       | 50       |
| 4.1.1.55 | 0        | 0        | 0        | 0        | 0        | 0        | 0        | 0        | 0        | 0        | 0        | 0        | 0        | 0        | 0        | 0        | 0        | 0        |
| 4.1.1.7  | 0        | 0        | 0        | 0        | 0        | 0        | 0        | 0        | 0        | 0        | 0        | 0        | 0        | 0        | 0        | 0        | 0        | 0        |
| 4.1.1.70 | 0        | 1        | 3        | 0        | 0        | 0        | 1        | 0        | 1        | 2        | 0        | 0        | 1        | 0        | 0        | 0        | 0        | 1        |
| 4.1.1.77 | 0        | 0        | 0        | 0        | 0        | 0        | 0        | 0        | 0        | 0        | 0        | 0        | 0        | 0        | 0        | 0        | 0        | 0        |
| 4.1.2.-  | 3        | 10       | 2        | 4        | 13       | 16       | 7        | 3        | 9        | 10       | 5        | 7        | 5        | 2        | 6        | 2        | 1        | 6        |
| 4.1.3.-  | 25       | 28       | 39       | 14       | 38       | 25       | 40       | 13       | 34       | 19       | 26       | 35       | 27       | 29       | 17       | 8        | 11       | 27       |

| EC/KO    | AM-AD-10 | AM-AD-11 | AM-AD-12 | AM-AD-13 | AM-AD-14 | AM-AD-15 | AM-AD-16 | AM-AD-17 | AM-AD-18 | AM-AD-19 | AM-AD-20 | AM-AD-21 | AM-AD-22 | AM-AD-23 | AM-AD-24 | AM-AD-25 | AM-AD-26 | AM-AD-27 |
|----------|----------|----------|----------|----------|----------|----------|----------|----------|----------|----------|----------|----------|----------|----------|----------|----------|----------|----------|
| 4.1.3.39 | 1        | 0        | 0        | 0        | 2        | 0        | 0        | 0        | 0        | 0        | 2        | 1        | 2        | 0        | 2        | 0        | 1        | 0        |
| 4.1.99.- | 8        | 6        | 1        | 4        | 6        | 3        | 3        | 1        | 3        | 1        | 5        | 6        | 3        | 4        | 1        | 0        | 0        | 3        |
| 4.2.1.-  | 111      | 76       | 105      | 61       | 88       | 65       | 106      | 51       | 89       | 78       | 64       | 85       | 80       | 50       | 76       | 35       | 42       | 78       |
| 4.2.1.17 | 7        | 6        | 10       | 6        | 15       | 6        | 8        | 4        | 9        | 3        | 9        | 11       | 4        | 9        | 4        | 3        | 3        | 5        |
| 4.2.1.80 | 0        | 0        | 0        | 0        | 0        | 0        | 0        | 0        | 0        | 1        | 0        | 0        | 0        | 0        | 0        | 0        | 0        | 0        |
| 4.2.1.83 | 1        | 2        | 2        | 1        | 2        | 0        | 1        | 0        | 0        | 0        | 1        | 0        | 0        | 1        | 0        | 0        | 0        | 2        |
| 4.2.1.84 | 0        | 1        | 1        | 0        | 1        | 0        | 1        | 0        | 0        | 1        | 1        | 2        | 0        | 2        | 0        | 0        | 0        | 1        |
| 5.1.2.2  | 0        | 0        | 0        | 0        | 0        | 0        | 0        | 0        | 0        | 0        | 0        | 0        | 0        | 0        | 0        | 0        | 0        | 0        |
| 5.2.1.2  | 0        | 0        | 0        | 0        | 0        | 0        | 0        | 0        | 0        | 0        | 0        | 0        | 0        | 0        | 0        | 0        | 0        | 0        |
| 5.3.3.4  | 0        | 0        | 0        | 0        | 0        | 0        | 0        | 0        | 0        | 0        | 0        | 0        | 0        | 0        | 0        | 0        | 0        | 0        |
| 5.3.99.- | 8        | 8        | 5        | 3        | 6        | 10       | 5        | 2        | 10       | 2        | 2        | 3        | 4        | 2        | 1        | 1        | 2        | 3        |
| 5.4.99.- | 0        | 1        | 0        | 1        | 0        | 1        | 0        | 1        | 0        | 0        | 0        | 0        | 1        | 0        | 1        | 1        | 1        | 1        |
| 5.5.1.1  | 4        | 1        | 7        | 2        | 5        | 3        | 4        | 3        | 6        | 7        | 5        | 1        | 0        | 4        | 7        | 3        | 3        | 4        |
| 5.5.1.2  | 0        | 0        | 0        | 0        | 0        | 0        | 0        | 0        | 0        | 0        | 0        | 0        | 0        | 0        | 0        | 0        | 0        | 0        |
| 6.2.1.-  | 0        | 0        | 0        | 0        | 0        | 0        | 0        | 0        | 0        | 0        | 0        | 0        | 0        | 0        | 0        | 0        | 0        | 0        |
| 6.3.5.2  | 26       | 32       | 30       | 19       | 30       | 29       | 31       | 17       | 44       | 23       | 30       | 28       | 32       | 20       | 15       | 15       | 19       | 28       |
| K00002   | 2        | 3        | 3        | 0        | 4        | 4        | 3        | 1        | 4        | 1        | 5        | 2        | 3        | 0        | 4        | 0        | 0        | 3        |
| K00055   | 0        | 0        | 0        | 0        | 1        | 0        | 0        | 0        | 0        | 0        | 0        | 0        | 0        | 0        | 0        | 0        | 0        | 0        |
| K00074   | 4        | 9        | 13       | 6        | 18       | 6        | 8        | 7        | 12       | 10       | 8        | 13       | 8        | 4        | 1        | 2        | 2        | 8        |
| K00088   | 24       | 27       | 35       | 18       | 37       | 28       | 39       | 12       | 35       | 17       | 23       | 28       | 27       | 14       | 19       | 7        | 7        | 18       |
| K00100   | 77       | 72       | 85       | 49       | 91       | 65       | 85       | 37       | 106      | 64       | 66       | 100      | 85       | 53       | 60       | 33       | 37       | 66       |
| K00128   | 2        | 2        | 1        | 3        | 4        | 3        | 1        | 1        | 6        | 0        | 3        | 3        | 2        | 1        | 1        | 0        | 0        | 1        |
| K00129   | 0        | 0        | 0        | 0        | 0        | 0        | 0        | 0        | 0        | 0        | 0        | 0        | 0        | 0        | 0        | 0        | 0        | 0        |
| K00132   | 3        | 0        | 0        | 1        | 1        | 1        | 1        | 0        | 2        | 0        | 0        | 1        | 0        | 0        | 0        | 0        | 1        | 1        |
| K00141   | 0        | 0        | 0        | 0        | 0        | 0        | 0        | 0        | 0        | 0        | 0        | 0        | 0        | 0        | 0        | 0        | 0        | 0        |
| K00146   | 0        | 0        | 0        | 0        | 0        | 0        | 0        | 0        | 0        | 0        | 0        | 0        | 0        | 0        | 0        | 0        | 0        | 0        |
| K00148   | 0        | 0        | 0        | 0        | 0        | 0        | 0        | 0        | 0        | 0        | 0        | 0        | 0        | 0        | 0        | 0        | 0        | 0        |
| K00155   | 0        | 0        | 1        | 0        | 0        | 0        | 0        | 0        | 0        | 1        | 0        | 0        | 1        | 1        | 1        | 0        | 0        | 1        |
| K00169   | 0        | 9        | 4        | 5        | 6        | 3        | 4        | 1        | 6        | 2        | 3        | 3        | 3        | 6        | 3        | 0        | 0        | 5        |
| K00224   | 0        | 0        | 2        | 1        | 0        | 0        | 2        | 1        | 0        | 1        | 1        | 1        | 1        | 0        | 1        | 0        | 0        | 1        |
| K00274   | 0        | 0        | 0        | 0        | 0        | 0        | 0        | 0        | 0        | 0        | 0        | 0        | 0        | 0        | 0        | 0        | 0        | 0        |
| K00446   | 0        | 0        | 0        | 0        | 0        | 0        | 0        | 0        | 0        | 0        | 0        | 0        | 0        | 0        | 0        | 0        | 0        | 0        |
| K00448   | 0        | 0        | 0        | 0        | 0        | 0        | 0        | 0        | 0        | 0        | 0        | 0        | 0        | 0        | 0        | 0        | 0        | 0        |
| K00462   | 2        | 0        | 4        | 1        | 3        | 1        | 3        | 1        | 1        | 1        | 1        | 0        | 0        | 0        | 2        | 1        | 3        | 2        |
| K00480   | 0        | 0        | 0        | 0        | 0        | 0        | 0        | 0        | 0        | 0        | 0        | 0        | 0        | 0        | 0        | 0        | 0        | 0        |
| K00481   | 0        | 0        | 0        | 0        | 0        | 0        | 0        | 0        | 0        | 0        | 0        | 0        | 0        | 0        | 0        | 0        | 0        | 0        |
| K00539   | 0        | 0        | 3        | 1        | 0        | 0        | 4        | 1        | 0        | 1        | 1        | 0        | 1        | 1        | 1        | 1        | 0        | 1        |
| K00599   | 58       | 70       | 74       | 41       | 70       | 54       | 85       | 30       | 67       | 49       | 66       | 79       | 88       | 54       | 38       | 15       | 23       | 69       |
| K00626   | 2        | 2        | 4        | 3        | 2        | 6        | 6        | 4        | 12       | 6        | 3        | 6        | 5        | 4        | 1        | 0        | 2        | 2        |
| K00632   | 0        | 0        | 0        | 0        | 0        | 0        | 0        | 0        | 1        | 0        | 0        | 0        | 0        | 0        | 0        | 0        | 0        | 0        |
| K00680   | 76       | 51       | 66       | 52       | 59       | 59       | 67       | 31       | 63       | 55       | 47       | 75       | 71       | 47       | 43       | 24       | 37       | 66       |
| K00757   | 9        | 11       | 22       | 15       | 13       | 12       | 22       | 9        | 29       | 18       | 8        | 26       | 23       | 7        | 14       | 11       | 8        | 14       |
| K00758   | 6        | 3        | 3        | 1        | 5        | 6        | 5        | 4        | 6        | 0        | 3        | 6        | 4        | 2        | 1        | 0        | 3        | 6        |
| K00760   | 47       | 38       | 36       | 21       | 42       | 31       | 34       | 15       | 42       | 19       | 34       | 37       | 33       | 20       | 19       | 12       | 16       | 37       |
| K00799   | 0        | 0        | 0        | 0        | 0        | 0        | 0        | 0        | 0        | 0        | 0        | 0        | 0        | 0        | 0        | 0        | 0        | 0        |
| K00857   | 20       | 12       | 16       | 13       | 17       | 12       | 14       | 8        | 18       | 15       | 12       | 16       | 25       | 13       | 12       | 11       | 12       | 21       |
| K00876   | 52       | 48       | 43       | 39       | 48       | 30       | 52       | 21       | 43       | 35       | 29       | 51       | 52       | 27       | 34       | 18       | 23       | 46       |
| K01026   | 0        | 0        | 2        | 1        | 0        | 0        | 1        | 0        | 2        | 1        | 1        | 2        | 1        | 1        | 0        | 0        | 0        | 0        |
| K01031   | 0        | 0        | 0        | 0        | 0        | 0        | 0        | 0        | 0        | 0        | 0        | 0        | 0        | 0        | 0        | 0        | 0        | 0        |

| EC/KO  | AM-AD-10 | AM-AD-11 | AM-AD-12 | AM-AD-13 | AM-AD-14 | AM-AD-15 | AM-AD-16 | AM-AD-17 | AM-AD-18 | AM-AD-19 | AM-AD-20 | AM-AD-21 | AM-AD-22 | AM-AD-23 | AM-AD-24 | AM-AD-25 | AM-AD-26 | AM-AD-27 |
|--------|----------|----------|----------|----------|----------|----------|----------|----------|----------|----------|----------|----------|----------|----------|----------|----------|----------|----------|
| K01034 | 3        | 1        | 3        | 1        | 2        | 2        | 3        | 1        | 2        | 1        | 1        | 1        | 2        | 0        | 3        | 1        | 2        | 3        |
| K01039 | 1        | 2        | 1        | 0        | 1        | 0        | 2        | 1        | 0        | 1        | 0        | 2        | 0        | 1        | 0        | 0        | 2        | 1        |
| K01041 | 6        | 5        | 9        | 6        | 4        | 4        | 10       | 4        | 7        | 7        | 2        | 9        | 10       | 3        | 2        | 4        | 6        | 4        |
| K01053 | 0        | 0        | 0        | 0        | 0        | 0        | 0        | 0        | 1        | 0        | 0        | 0        | 0        | 0        | 0        | 0        | 0        | 0        |
| K01055 | 0        | 0        | 0        | 0        | 0        | 0        | 0        | 0        | 0        | 0        | 0        | 0        | 0        | 0        | 0        | 0        | 0        | 0        |
| K01061 | 0        | 0        | 0        | 0        | 0        | 0        | 0        | 0        | 0        | 0        | 0        | 0        | 0        | 0        | 0        | 0        | 0        | 0        |
| K01066 | 12       | 5        | 15       | 9        | 11       | 7        | 11       | 5        | 13       | 8        | 8        | 12       | 13       | 6        | 9        | 4        | 8        | 16       |
| K01075 | 0        | 0        | 2        | 1        | 0        | 0        | 2        | 2        | 0        | 0        | 0        | 1        | 1        | 2        | 1        | 1        | 0        | 0        |
| K01077 | 12       | 9        | 18       | 11       | 4        | 6        | 13       | 9        | 11       | 21       | 7        | 11       | 19       | 10       | 17       | 12       | 10       | 18       |
| K01101 | 9        | 4        | 2        | 3        | 8        | 10       | 1        | 0        | 10       | 3        | 2        | 4        | 8        | 4        | 3        | 0        | 3        | 1        |
| K01195 | 11       | 12       | 16       | 12       | 14       | 7        | 17       | 9        | 11       | 10       | 11       | 14       | 12       | 8        | 9        | 4        | 6        | 13       |
| K01426 | 1        | 0        | 0        | 0        | 2        | 2        | 0        | 0        | 1        | 0        | 0        | 3        | 2        | 1        | 2        | 0        | 1        | 1        |
| K01428 | 3        | 0        | 2        | 0        | 1        | 2        | 2        | 0        | 0        | 2        | 3        | 2        | 3        | 1        | 0        | 1        | 1        | 1        |
| K01457 | 0        | 0        | 0        | 0        | 0        | 0        | 0        | 0        | 0        | 0        | 1        | 0        | 0        | 1        | 0        | 0        | 0        | 0        |
| K01464 | 0        | 3        | 5        | 1        | 3        | 3        | 5        | 0        | 8        | 1        | 2        | 2        | 2        | 1        | 3        | 0        | 1        | 3        |
| K01489 | 32       | 32       | 32       | 18       | 35       | 23       | 29       | 13       | 32       | 25       | 23       | 32       | 37       | 17       | 22       | 10       | 16       | 27       |
| K01500 | 0        | 0        | 0        | 0        | 0        | 0        | 0        | 0        | 0        | 0        | 0        | 0        | 0        | 0        | 0        | 0        | 0        | 0        |
| K01501 | 0        | 1        | 2        | 3        | 2        | 2        | 3        | 1        | 4        | 3        | 0        | 3        | 3        | 0        | 0        | 0        | 0        | 1        |
| K01502 | 0        | 0        | 0        | 0        | 0        | 0        | 0        | 0        | 0        | 0        | 0        | 0        | 0        | 0        | 0        | 0        | 0        | 0        |
| K01512 | 7        | 8        | 14       | 8        | 14       | 16       | 21       | 3        | 12       | 5        | 25       | 11       | 10       | 15       | 5        | 1        | 2        | 7        |
| K01560 | 6        | 8        | 15       | 6        | 11       | 10       | 17       | 4        | 11       | 6        | 9        | 9        | 8        | 7        | 2        | 1        | 2        | 6        |
| K01561 | 1        | 1        | 0        | 0        | 1        | 1        | 0        | 0        | 1        | 0        | 0        | 0        | 1        | 0        | 0        | 0        | 0        | 0        |
| K01563 | 0        | 0        | 0        | 0        | 0        | 0        | 0        | 0        | 0        | 0        | 0        | 0        | 0        | 0        | 0        | 0        | 0        | 0        |
| K01564 | 2        | 1        | 3        | 1        | 2        | 3        | 1        | 1        | 1        | 1        | 0        | 4        | 5        | 3        | 2        | 3        | 1        | 3        |
| K01607 | 30       | 28       | 13       | 8        | 22       | 21       | 15       | 13       | 20       | 12       | 11       | 21       | 24       | 13       | 23       | 9        | 13       | 25       |
| K01612 | 0        | 0        | 0        | 0        | 1        | 1        | 0        | 0        | 0        | 0        | 0        | 0        | 0        | 0        | 0        | 0        | 0        | 0        |
| K01615 | 16       | 20       | 30       | 11       | 16       | 25       | 26       | 14       | 23       | 19       | 11       | 25       | 22       | 9        | 13       | 7        | 16       | 18       |
| K01617 | 0        | 0        | 0        | 0        | 0        | 0        | 0        | 0        | 0        | 0        | 0        | 0        | 0        | 0        | 0        | 0        | 0        | 0        |
| K01666 | 10       | 13       | 12       | 7        | 11       | 11       | 12       | 4        | 7        | 4        | 11       | 9        | 7        | 9        | 7        | 0        | 3        | 7        |
| K01692 | 0        | 0        | 1        | 0        | 1        | 0        | 1        | 1        | 0        | 0        | 0        | 0        | 0        | 0        | 0        | 0        | 0        | 0        |
| K01721 | 0        | 0        | 0        | 0        | 0        | 0        | 0        | 0        | 0        | 0        | 0        | 0        | 0        | 0        | 0        | 0        | 0        | 0        |
| K01726 | 10       | 1        | 9        | 11       | 9        | 3        | 11       | 3        | 17       | 13       | 6        | 10       | 12       | 2        | 12       | 13       | 5        | 14       |
| K01781 | 2        | 1        | 0        | 2        | 0        | 0        | 1        | 0        | 1        | 1        | 0        | 1        | 0        | 1        | 2        | 0        | 0        | 1        |
| K01821 | 2        | 1        | 5        | 1        | 1        | 2        | 2        | 2        | 2        | 1        | 1        | 1        | 3        | 0        | 2        | 1        | 1        | 2        |
| K01856 | 0        | 0        | 0        | 0        | 0        | 0        | 0        | 0        | 0        | 0        | 0        | 0        | 0        | 0        | 0        | 0        | 0        | 0        |
| K01857 | 0        | 0        | 1        | 1        | 0        | 0        | 1        | 0        | 0        | 0        | 1        | 0        | 0        | 0        | 0        | 0        | 0        | 1        |
| K01913 | 0        | 0        | 0        | 0        | 1        | 0        | 0        | 0        | 1        | 0        | 1        | 0        | 0        | 1        | 0        | 0        | 1        | 1        |
| K01951 | 21       | 21       | 24       | 19       | 26       | 24       | 25       | 16       | 32       | 22       | 20       | 24       | 23       | 14       | 11       | 10       | 15       | 17       |
| K02554 | 0        | 0        | 0        | 0        | 0        | 0        | 0        | 0        | 0        | 0        | 0        | 0        | 0        | 0        | 0        | 0        | 0        | 0        |
| K03381 | 0        | 0        | 0        | 0        | 0        | 0        | 0        | 0        | 0        | 0        | 0        | 0        | 0        | 0        | 0        | 0        | 0        | 0        |
| K03382 | 0        | 2        | 1        | 0        | 2        | 0        | 1        | 0        | 1        | 0        | 0        | 2        | 0        | 0        | 0        | 0        | 0        | 0        |
| K03464 | 0        | 0        | 0        | 0        | 0        | 0        | 0        | 0        | 0        | 0        | 0        | 0        | 0        | 0        | 0        | 0        | 0        | 0        |
| K03518 | 10       | 17       | 15       | 6        | 18       | 12       | 16       | 6        | 18       | 10       | 22       | 8        | 16       | 5        | 6        | 2        | 5        | 8        |
| K03862 | 0        | 0        | 0        | 0        | 0        | 0        | 0        | 0        | 0        | 0        | 0        | 0        | 0        | 0        | 0        | 0        | 0        | 0        |
| K04099 | 0        | 0        | 0        | 0        | 0        | 0        | 0        | 0        | 0        | 0        | 0        | 0        | 0        | 0        | 0        | 0        | 0        | 0        |
| K04100 | 0        | 0        | 0        | 0        | 0        | 0        | 0        | 0        | 0        | 0        | 0        | 0        | 0        | 0        | 0        | 0        | 0        | 0        |
| K04102 | 0        | 0        | 0        | 0        | 0        | 0        | 0        | 0        | 0        | 0        | 0        | 0        | 0        | 0        | 0        | 0        | 0        | 0        |
| K04116 | 0        | 0        | 0        | 0        | 0        | 0        | 0        | 0        | 0        | 0        | 0        | 0        | 0        | 0        | 0        | 0        | 0        | 0        |
| K05394 | 0        | 1        | 2        | 1        | 2        | 0        | 1        | 1        | 1        | 1        | 1        | 0        | 0        | 1        | 1        | 1        | 0        | 1        |

| EC/KO  | AM-AD-10 | AM-AD-11 | AM-AD-12 | AM-AD-13 | AM-AD-14 | AM-AD-15 | AM-AD-16 | AM-AD-17 | AM-AD-18 | AM-AD-19 | AM-AD-20 | AM-AD-21 | AM-AD-22 | AM-AD-23 | AM-AD-24 | AM-AD-25 | AM-AD-26 | AM-AD-27 |
|--------|----------|----------|----------|----------|----------|----------|----------|----------|----------|----------|----------|----------|----------|----------|----------|----------|----------|----------|
| K05549 | 0        | 0        | 0        | 0        | 0        | 0        | 0        | 0        | 0        | 0        | 0        | 0        | 0        | 0        | 0        | 0        | 0        | 0        |
| K05783 | 0        | 0        | 0        | 0        | 0        | 0        | 0        | 0        | 0        | 0        | 0        | 0        | 0        | 0        | 0        | 0        | 0        | 0        |
| K05797 | 0        | 0        | 0        | 0        | 0        | 0        | 0        | 0        | 0        | 0        | 0        | 0        | 0        | 0        | 0        | 0        | 0        | 0        |
| K06281 | 0        | 0        | 1        | 2        | 2        | 1        | 1        | 2        | 2        | 2        | 1        | 2        | 2        | 1        | 3        | 3        | 1        | 1        |
| K06446 | 3        | 10       | 6        | 2        | 8        | 5        | 8        | 3        | 10       | 9        | 3        | 4        | 4        | 2        | 5        | 0        | 2        | 6        |
| K06912 | 0        | 0        | 0        | 0        | 0        | 0        | 0        | 0        | 0        | 0        | 0        | 0        | 0        | 0        | 0        | 0        | 0        | 0        |
| K07535 | 1        | 0        | 0        | 1        | 0        | 0        | 0        | 0        | 0        | 0        | 0        | 0        | 0        | 0        | 0        | 0        | 0        | 0        |
| K07536 | 3        | 3        | 3        | 2        | 0        | 2        | 3        | 1        | 2        | 3        | 2        | 3        | 4        | 2        | 4        | 0        | 2        | 3        |
| K08689 | 0        | 0        | 0        | 0        | 0        | 0        | 0        | 0        | 0        | 0        | 0        | 0        | 0        | 0        | 0        | 0        | 0        | 0        |
| K08710 | 0        | 0        | 0        | 0        | 0        | 0        | 0        | 0        | 0        | 0        | 0        | 0        | 0        | 0        | 0        | 0        | 0        | 0        |
| K09461 | 0        | 0        | 0        | 0        | 0        | 0        | 0        | 0        | 0        | 0        | 0        | 0        | 0        | 0        | 0        | 0        | 0        | 0        |
| K10217 | 0        | 0        | 0        | 0        | 0        | 0        | 0        | 0        | 0        | 0        | 0        | 0        | 0        | 0        | 0        | 0        | 0        | 0        |
| K10218 | 2        | 0        | 0        | 0        | 0        | 1        | 1        | 0        | 0        | 0        | 0        | 0        | 0        | 0        | 0        | 0        | 0        | 0        |
| K10220 | 0        | 0        | 0        | 0        | 0        | 0        | 0        | 0        | 0        | 0        | 0        | 0        | 0        | 0        | 0        | 0        | 0        | 0        |
| K11180 | 0        | 0        | 0        | 0        | 0        | 0        | 0        | 0        | 0        | 0        | 0        | 0        | 0        | 0        | 0        | 0        | 0        | 0        |
| K13953 | 0        | 0        | 0        | 0        | 1        | 0        | 0        | 1        | 0        | 0        | 0        | 0        | 0        | 0        | 0        | 0        | 0        | 0        |
| K14333 | 0        | 0        | 0        | 0        | 0        | 0        | 0        | 0        | 0        | 0        | 0        | 0        | 0        | 0        | 0        | 0        | 0        | 0        |
| K14519 | 0        | 0        | 0        | 0        | 0        | 0        | 0        | 0        | 0        | 0        | 0        | 0        | 0        | 0        | 0        | 0        | 0        | 0        |
| K15054 | 0        | 0        | 0        | 0        | 0        | 0        | 0        | 0        | 0        | 0        | 0        | 0        | 0        | 0        | 0        | 0        | 0        | 0        |
| K16173 | 0        | 0        | 2        | 0        | 1        | 1        | 0        | 0        | 2        | 0        | 0        | 0        | 0        | 0        | 0        | 0        | 0        | 0        |
| K16514 | 0        | 0        | 0        | 0        | 0        | 0        | 0        | 0        | 0        | 1        | 0        | 0        | 0        | 0        | 0        | 0        | 0        | 0        |
| K16874 | 0        | 0        | 0        | 0        | 0        | 0        | 0        | 0        | 0        | 0        | 0        | 0        | 0        | 0        | 0        | 0        | 0        | 0        |

| EC/KO      | AM-AD-28 | AM-AD-29 | AM-AD-3 | AM-AD-30 | AM-AD-31 | AM-AD-32 | AM-AD-33 | AM-AD-34 | AM-AD-35 | AM-AD-36 | AM-AD-37 | AM-AD-38 | AM-AD-39 | AM-AD-4 | AM-AD-40 | AM-AD-41 | AM-AD-42 | AM-AD-43 | AM-AD-44 |
|------------|----------|----------|---------|----------|----------|----------|----------|----------|----------|----------|----------|----------|----------|---------|----------|----------|----------|----------|----------|
| 1.1.1.-    | 47       | 55       | 75      | 34       | 78       | 54       | 54       | 64       | 39       | 41       | 55       | 71       | 28       | 57      | 41       | 91       | 36       | 72       | 81       |
| 1.1.1.1    | 34       | 25       | 47      | 23       | 47       | 38       | 41       | 32       | 34       | 26       | 37       | 44       | 10       | 52      | 20       | 63       | 19       | 51       | 52       |
| 1.1.1.157  | 0        | 0        | 1       | 3        | 1        | 1        | 3        | 2        | 0        | 1        | 3        | 0        | 0        | 3       | 0        | 1        | 0        | 2        | 2        |
| 1.1.1.205  | 12       | 11       | 23      | 14       | 29       | 26       | 23       | 22       | 18       | 20       | 21       | 18       | 12       | 31      | 11       | 40       | 14       | 31       | 29       |
| 1.1.1.35   | 1        | 1        | 3       | 0        | 4        | 5        | 1        | 1        | 0        | 1        | 3        | 3        | 1        | 2       | 1        | 5        | 0        | 4        | 3        |
| 1.12.99.6  | 0        | 0        | 3       | 3        | 5        | 3        | 2        | 4        | 3        | 1        | 3        | 0        | 3        | 3       | 3        | 1        | 1        | 2        | 3        |
| 1.13.11.-  | 0        | 0        | 0       | 0        | 0        | 0        | 0        | 0        | 0        | 0        | 0        | 0        | 0        | 0       | 0        | 0        | 0        | 0        | 0        |
| 1.13.11.1  | 0        | 0        | 0       | 0        | 0        | 0        | 0        | 0        | 0        | 0        | 0        | 0        | 0        | 0       | 0        | 0        | 0        | 0        | 0        |
| 1.13.11.2  | 0        | 0        | 0       | 0        | 0        | 0        | 0        | 0        | 0        | 0        | 0        | 0        | 0        | 0       | 0        | 0        | 0        | 0        | 0        |
| 1.13.11.3  | 0        | 0        | 0       | 0        | 0        | 0        | 0        | 0        | 0        | 0        | 0        | 0        | 0        | 0       | 0        | 0        | 0        | 0        | 0        |
| 1.13.11.39 | 0        | 0        | 0       | 0        | 0        | 0        | 0        | 0        | 0        | 0        | 0        | 0        | 0        | 0       | 0        | 0        | 0        | 0        | 0        |
| 1.13.11.5  | 0        | 0        | 0       | 0        | 1        | 0        | 1        | 0        | 0        | 0        | 0        | 0        | 0        | 0       | 0        | 0        | 0        | 0        | 0        |
| 1.13.11.8  | 0        | 0        | 0       | 0        | 0        | 0        | 0        | 0        | 0        | 0        | 0        | 0        | 0        | 0       | 0        | 0        | 0        | 0        | 0        |
| 1.14.12.10 | 0        | 0        | 0       | 0        | 0        | 3        | 0        | 0        | 0        | 0        | 0        | 0        | 0        | 0       | 0        | 1        | 0        | 0        | 0        |
| 1.14.12.13 | 0        | 0        | 0       | 0        | 0        | 0        | 0        | 0        | 0        | 0        | 0        | 0        | 0        | 0       | 0        | 0        | 0        | 0        | 0        |
| 1.14.12.18 | 0        | 0        | 0       | 0        | 0        | 0        | 0        | 0        | 0        | 0        | 0        | 0        | 0        | 0       | 0        | 0        | 0        | 0        | 0        |
| 1.14.13.-  | 0        | 0        | 0       | 0        | 1        | 2        | 0        | 0        | 0        | 1        | 0        | 0        | 0        | 0       | 0        | 1        | 0        | 1        | 1        |
| 1.14.13.1  | 0        | 0        | 0       | 0        | 0        | 0        | 0        | 0        | 0        | 0        | 0        | 0        | 0        | 0       | 0        | 0        | 0        | 0        | 0        |
| 1.14.13.2  | 0        | 0        | 0       | 0        | 0        | 0        | 0        | 0        | 0        | 0        | 0        | 0        | 0        | 0       | 0        | 0        | 0        | 0        | 0        |
| 1.14.13.50 | 0        | 0        | 0       | 0        | 0        | 0        | 0        | 0        | 0        | 0        | 0        | 0        | 0        | 0       | 0        | 0        | 0        | 0        | 0        |
| 1.14.13.7  | 0        | 1        | 0       | 0        | 0        | 0        | 0        | 2        | 0        | 0        | 0        | 0        | 0        | 0       | 0        | 0        | 0        | 0        | 0        |
| 1.14.13.8  | 0        | 0        | 0       | 0        | 0        | 0        | 0        | 0        | 0        | 0        | 0        | 0        | 0        | 0       | 0        | 0        | 0        | 0        | 0        |
| 1.14.13.82 | 0        | 0        | 0       | 0        | 0        | 0        | 0        | 0        | 0        | 0        | 0        | 0        | 0        | 0       | 0        | 0        | 0        | 0        | 0        |
| 1.14.99.-  | 0        | 0        | 0       | 0        | 0        | 0        | 0        | 0        | 0        | 0        | 0        | 0        | 0        | 0       | 0        | 0        | 0        | 0        | 0        |
| 1.17.99.1  | 0        | 0        | 0       | 0        | 0        | 0        | 0        | 0        | 0        | 0        | 0        | 0        | 0        | 0       | 0        | 0        | 0        | 0        | 0        |
| 1.18.6.1   | 0        | 0        | 0       | 1        | 0        | 0        | 2        | 0        | 0        | 0        | 0        | 0        | 0        | 0       | 0        | 0        | 0        | 1        | 0        |
| 1.2.1.-    | 0        | 0        | 0       | 0        | 0        | 1        | 0        | 0        | 0        | 0        | 0        | 0        | 0        | 0       | 0        | 0        | 0        | 0        | 0        |
| 1.2.1.10   | 3        | 3        | 8       | 1        | 5        | 12       | 7        | 0        | 2        | 4        | 3        | 2        | 0        | 7       | 2        | 8        | 3        | 4        | 9        |
| 1.2.1.3    | 7        | 7        | 9       | 4        | 14       | 8        | 13       | 9        | 6        | 7        | 12       | 6        | 2        | 13      | 3        | 14       | 2        | 16       | 11       |
| 1.2.1.39   | 0        | 0        | 0       | 0        | 0        | 0        | 0        | 0        | 0        | 0        | 0        | 0        | 0        | 0       | 0        | 0        | 0        | 0        | 0        |
| 1.2.7.1    | 6        | 5        | 18      | 12       | 10       | 12       | 16       | 15       | 11       | 8        | 8        | 11       | 5        | 17      | 5        | 24       | 9        | 18       | 11       |
| 1.2.99.2   | 1        | 1        | 6       | 1        | 6        | 7        | 3        | 3        | 0        | 3        | 3        | 1        | 1        | 3       | 1        | 6        | 1        | 4        | 6        |
| 1.3.1.-    | 1        | 1        | 1       | 0        | 1        | 0        | 0        | 1        | 0        | 0        | 0        | 0        | 0        | 0       | 0        | 0        | 0        | 0        | 0        |
| 1.3.1.2    | 0        | 0        | 2       | 1        | 1        | 3        | 0        | 1        | 2        | 1        | 1        | 0        | 1        | 2       | 1        | 1        | 1        | 0        | 2        |
| 1.3.1.25   | 0        | 0        | 0       | 0        | 0        | 0        | 0        | 0        | 0        | 0        | 0        | 0        | 0        | 0       | 0        | 0        | 0        | 0        | 0        |
| 1.3.99.-   | 0        | 0        | 0       | 0        | 0        | 0        | 0        | 0        | 0        | 0        | 0        | 0        | 0        | 0       | 0        | 0        | 0        | 0        | 0        |
| 1.6.5.-    | 31       | 29       | 63      | 32       | 55       | 52       | 61       | 57       | 52       | 32       | 49       | 31       | 27       | 59      | 37       | 83       | 33       | 72       | 50       |
| 1.7.1.-    | 8        | 6        | 17      | 12       | 10       | 5        | 13       | 15       | 10       | 5        | 8        | 8        | 5        | 12      | 6        | 19       | 5        | 10       | 10       |
| 1.8.99.3   | 0        | 0        | 0       | 0        | 2        | 1        | 1        | 0        | 0        | 0        | 0        | 0        | 0        | 2       | 0        | 0        | 1        | 0        | 1        |
| 2.1.1.-    | 199      | 158      | 481     | 181      | 363      | 281      | 299      | 250      | 195      | 211      | 307      | 302      | 113      | 330     | 164      | 473      | 155      | 405      | 306      |
| 2.3.1.-    | 130      | 120      | 293     | 125      | 252      | 182      | 191      | 199      | 174      | 110      | 182      | 195      | 87       | 204     | 108      | 277      | 94       | 263      | 236      |
| 2.3.1.16   | 0        | 1        | 1       | 0        | 0        | 0        | 4        | 2        | 1        | 2        | 1        | 0        | 1        | 1       | 0        | 3        | 1        | 3        | 2        |
| 2.3.1.5    | 0        | 0        | 0       | 0        | 0        | 1        | 0        | 0        | 0        | 0        | 0        | 0        | 0        | 0       | 0        | 0        | 0        | 0        | 0        |
| 2.3.1.9    | 0        | 0        | 2       | 0        | 1        | 2        | 0        | 2        | 1        | 1        | 1        | 1        | 0        | 0       | 0        | 0        | 1        | 1        | 3        |
| 2.4.2.10   | 5        | 9        | 21      | 8        | 21       | 19       | 13       | 18       | 11       | 12       | 16       | 12       | 5        | 24      | 8        | 29       | 11       | 19       | 18       |
| 2.4.2.3    | 5        | 6        | 18      | 3        | 12       | 6        | 8        | 8        | 7        | 8        | 6        | 11       | 3        | 6       | 4        | 13       | 4        | 15       | 16       |
| 2.4.2.4    | 0        | 0        | 11      | 1        | 3        | 4        | 6        | 0        | 1        | 2        | 1        | 0        | 0        | 5       | 0        | 9        | 2        | 5        | 3        |
| 2.4.2.8    | 13       | 8        | 16      | 10       | 22       | 16       | 20       | 11       | 15       | 10       | 12       | 20       | 7        | 16      | 5        | 29       | 5        | 27       | 14       |
| 2.5.1.-    | 12       | 12       | 45      | 18       | 24       | 23       | 27       | 30       | 29       | 12       | 27       | 21       | 10       | 24      | 16       | 40       | 16       | 36       | 21       |

| EC/KO    | AM-AD-28 | AM-AD-29 | AM-AD-3 | AM-AD-30 | AM-AD-31 | AM-AD-32 | AM-AD-33 | AM-AD-34 | AM-AD-35 | AM-AD-36 | AM-AD-37 | AM-AD-38 | AM-AD-39 | AM-AD-4 | AM-AD-40 | AM-AD-41 | AM-AD-42 | AM-AD-43 | AM-AD-44 |
|----------|----------|----------|---------|----------|----------|----------|----------|----------|----------|----------|----------|----------|----------|---------|----------|----------|----------|----------|----------|
| 2.5.1.18 | 1        | 1        | 1       | 0        | 1        | 10       | 1        | 2        | 0        | 0        | 0        | 0        | 0        | 1       | 0        | 0        | 0        | 0        | 4        |
| 2.6.1.-  | 29       | 21       | 56      | 29       | 51       | 37       | 48       | 39       | 46       | 27       | 42       | 28       | 24       | 50      | 30       | 53       | 26       | 42       | 45       |
| 2.7.1.21 | 4        | 4        | 25      | 8        | 14       | 8        | 9        | 10       | 12       | 3        | 9        | 7        | 2        | 11      | 4        | 9        | 4        | 12       | 9        |
| 2.7.1.48 | 18       | 19       | 64      | 24       | 51       | 39       | 40       | 36       | 30       | 21       | 41       | 41       | 10       | 35      | 21       | 61       | 21       | 49       | 33       |
| 2.7.4.-  | 18       | 12       | 39      | 18       | 20       | 22       | 24       | 18       | 18       | 12       | 23       | 19       | 10       | 19      | 12       | 30       | 10       | 21       | 16       |
| 2.8.3.-  | 2        | 1        | 2       | 0        | 3        | 1        | 5        | 2        | 2        | 2        | 2        | 0        | 2        | 3       | 1        | 3        | 2        | 2        | 3        |
| 2.8.3.1  | 0        | 1        | 0       | 0        | 1        | 0        | 1        | 1        | 1        | 3        | 0        | 1        | 0        | 0       | 0        | 1        | 0        | 0        | 1        |
| 2.8.3.12 | 0        | 0        | 0       | 0        | 1        | 0        | 1        | 0        | 0        | 0        | 1        | 1        | 0        | 1       | 0        | 0        | 1        | 0        | 0        |
| 2.8.3.6  | 1        | 2        | 0       | 0        | 0        | 0        | 1        | 1        | 1        | 2        | 0        | 1        | 0        | 1       | 0        | 0        | 0        | 1        | 2        |
| 2.8.3.8  | 0        | 0        | 2       | 1        | 6        | 2        | 4        | 1        | 1        | 0        | 5        | 1        | 0        | 1       | 0        | 0        | 0        | 2        | 8        |
| 3.1.1.-  | 5        | 2        | 7       | 3        | 12       | 6        | 12       | 6        | 3        | 6        | 8        | 9        | 2        | 5       | 4        | 10       | 2        | 4        | 3        |
| 3.1.1.1  | 4        | 6        | 7       | 10       | 11       | 9        | 11       | 8        | 5        | 4        | 8        | 7        | 4        | 12      | 7        | 12       | 3        | 11       | 10       |
| 3.1.1.17 | 1        | 1        | 2       | 3        | 2        | 1        | 2        | 3        | 3        | 1        | 2        | 2        | 4        | 3       | 1        | 3        | 2        | 4        | 2        |
| 3.1.1.2  | 1        | 1        | 0       | 1        | 0        | 2        | 1        | 0        | 0        | 0        | 0        | 0        | 0        | 0       | 0        | 0        | 0        | 0        | 0        |
| 3.1.1.24 | 1        | 1        | 8       | 1        | 5        | 2        | 3        | 1        | 1        | 0        | 4        | 1        | 0        | 3       | 2        | 3        | 3        | 6        | 1        |
| 3.1.1.45 | 0        | 0        | 0       | 0        | 0        | 1        | 0        | 0        | 0        | 0        | 0        | 0        | 0        | 0       | 0        | 0        | 0        | 0        | 0        |
| 3.1.2.-  | 1        | 0        | 0       | 0        | 1        | 2        | 0        | 1        | 1        | 1        | 4        | 0        | 0        | 1       | 1        | 0        | 0        | 0        | 0        |
| 3.1.2.23 | 3        | 5        | 10      | 7        | 12       | 6        | 10       | 8        | 8        | 2        | 8        | 8        | 4        | 11      | 8        | 11       | 6        | 11       | 6        |
| 3.1.3.1  | 13       | 5        | 28      | 18       | 29       | 18       | 26       | 28       | 29       | 6        | 14       | 12       | 12       | 22      | 11       | 29       | 19       | 29       | 21       |
| 3.1.3.2  | 2        | 3        | 6       | 3        | 4        | 3        | 5        | 10       | 6        | 1        | 3        | 3        | 2        | 3       | 2        | 9        | 3        | 8        | 5        |
| 3.1.3.41 | 0        | 1        | 0       | 0        | 1        | 0        | 0        | 0        | 0        | 0        | 0        | 0        | 0        | 1       | 0        | 0        | 0        | 0        | 0        |
| 3.2.1.31 | 2        | 1        | 4       | 2        | 9        | 3        | 8        | 7        | 1        | 5        | 4        | 5        | 2        | 1       | 2        | 9        | 3        | 4        | 2        |
| 3.3.2.9  | 0        | 0        | 0       | 0        | 0        | 0        | 0        | 0        | 0        | 0        | 0        | 0        | 0        | 0       | 0        | 0        | 0        | 0        | 0        |
| 3.5.1.-  | 15       | 14       | 48      | 16       | 27       | 27       | 34       | 20       | 15       | 19       | 20       | 23       | 8        | 32      | 12       | 43       | 18       | 31       | 23       |
| 3.5.1.4  | 3        | 0        | 1       | 1        | 4        | 2        | 2        | 4        | 2        | 2        | 3        | 4        | 1        | 1       | 3        | 4        | 0        | 1        | 1        |
| 3.5.1.5  | 0        | 3        | 5       | 1        | 5        | 2        | 1        | 2        | 0        | 3        | 3        | 6        | 0        | 3       | 4        | 2        | 1        | 2        | 3        |
| 3.5.1.54 | 2        | 3        | 4       | 0        | 4        | 7        | 0        | 0        | 1        | 2        | 6        | 4        | 0        | 2       | 4        | 2        | 1        | 3        | 3        |
| 3.5.1.6  | 1        | 1        | 3       | 0        | 1        | 1        | 1        | 1        | 0        | 2        | 1        | 1        | 2        | 3       | 0        | 2        | 3        | 1        | 3        |
| 3.5.2.-  | 0        | 0        | 0       | 0        | 0        | 0        | 0        | 0        | 0        | 0        | 0        | 0        | 0        | 0       | 0        | 0        | 0        | 0        | 0        |
| 3.5.2.2  | 0        | 0        | 0       | 1        | 3        | 3        | 0        | 1        | 0        | 1        | 4        | 0        | 1        | 0       | 0        | 1        | 0        | 2        | 2        |
| 3.5.4.-  | 17       | 17       | 71      | 22       | 35       | 24       | 26       | 27       | 33       | 16       | 32       | 30       | 9        | 33      | 21       | 46       | 15       | 36       | 18       |
| 3.5.4.5  | 10       | 10       | 29      | 10       | 22       | 20       | 25       | 21       | 11       | 7        | 14       | 24       | 5        | 12      | 10       | 30       | 12       | 28       | 17       |
| 3.5.5.1  | 1        | 1        | 2       | 1        | 2        | 1        | 1        | 2        | 0        | 1        | 3        | 0        | 2        | 1       | 1        | 0        | 1        | 2        | 1        |
| 3.5.5.7  | 0        | 0        | 0       | 0        | 0        | 0        | 0        | 0        | 0        | 0        | 0        | 0        | 0        | 0       | 0        | 0        | 0        | 0        | 0        |
| 3.5.99.3 | 0        | 0        | 0       | 0        | 0        | 0        | 0        | 0        | 0        | 0        | 0        | 0        | 0        | 0       | 0        | 0        | 0        | 0        | 0        |
| 3.6.1.7  | 2        | 5        | 7       | 3        | 6        | 7        | 3        | 4        | 0        | 4        | 7        | 9        | 1        | 6       | 6        | 7        | 0        | 6        | 3        |
| 3.7.1.-  | 1        | 1        | 2       | 3        | 0        | 3        | 0        | 2        | 0        | 1        | 2        | 0        | 0        | 1       | 1        | 1        | 0        | 1        | 1        |
| 3.7.1.2  | 3        | 3        | 2       | 6        | 5        | 4        | 4        | 10       | 8        | 2        | 6        | 1        | 2        | 6       | 4        | 11       | 3        | 6        | 3        |
| 3.8.1.2  | 6        | 3        | 9       | 10       | 8        | 6        | 8        | 9        | 11       | 2        | 5        | 8        | 6        | 8       | 2        | 14       | 5        | 7        | 8        |
| 3.8.1.3  | 0        | 0        | 0       | 0        | 0        | 0        | 0        | 0        | 0        | 0        | 0        | 0        | 0        | 0       | 0        | 0        | 0        | 0        | 0        |
| 3.8.1.5  | 0        | 0        | 0       | 0        | 3        | 0        | 0        | 1        | 0        | 0        | 1        | 1        | 0        | 1       | 2        | 0        | 0        | 0        | 0        |
| 4.1.1.-  | 6        | 8        | 13      | 7        | 9        | 13       | 5        | 19       | 11       | 12       | 9        | 8        | 8        | 15      | 10       | 22       | 7        | 16       | 13       |
| 4.1.1.44 | 27       | 27       | 74      | 20       | 48       | 24       | 36       | 32       | 35       | 23       | 38       | 34       | 20       | 45      | 17       | 58       | 22       | 53       | 36       |
| 4.1.1.55 | 0        | 0        | 0       | 0        | 0        | 0        | 0        | 0        | 0        | 0        | 0        | 0        | 0        | 0       | 0        | 0        | 0        | 0        | 0        |
| 4.1.1.7  | 0        | 0        | 0       | 0        | 0        | 0        | 0        | 0        | 0        | 0        | 0        | 0        | 0        | 0       | 0        | 0        | 0        | 0        | 0        |
| 4.1.1.70 | 1        | 1        | 0       | 0        | 0        | 1        | 1        | 0        | 0        | 0        | 2        | 1        | 0        | 1       | 0        | 0        | 0        | 0        | 0        |
| 4.1.1.77 | 0        | 0        | 0       | 0        | 0        | 0        | 0        | 0        | 0        | 0        | 0        | 0        | 0        | 0       | 0        | 0        | 0        | 0        | 0        |
| 4.1.2.-  | 6        | 7        | 6       | 2        | 7        | 7        | 9        | 3        | 4        | 3        | 4        | 10       | 1        | 8       | 2        | 11       | 2        | 7        | 6        |
| 4.1.3.-  | 16       | 12       | 22      | 19       | 27       | 18       | 28       | 20       | 11       | 12       | 17       | 23       | 5        | 16      | 11       | 39       | 10       | 27       | 18       |

| EC/KO    | AM-AD-28 | AM-AD-29 | AM-AD-3 | AM-AD-30 | AM-AD-31 | AM-AD-32 | AM-AD-33 | AM-AD-34 | AM-AD-35 | AM-AD-36 | AM-AD-37 | AM-AD-38 | AM-AD-39 | AM-AD-4 | AM-AD-40 | AM-AD-41 | AM-AD-42 | AM-AD-43 | AM-AD-44 |
|----------|----------|----------|---------|----------|----------|----------|----------|----------|----------|----------|----------|----------|----------|---------|----------|----------|----------|----------|----------|
| 4.1.3.39 | 0        | 0        | 0       | 0        | 2        | 1        | 0        | 1        | 4        | 0        | 0        | 0        | 0        | 0       | 0        | 0        | 0        | 0        | 0        |
| 4.1.99.- | 1        | 2        | 1       | 1        | 0        | 3        | 1        | 1        | 0        | 1        | 1        | 1        | 0        | 4       | 0        | 5        | 2        | 3        | 1        |
| 4.2.1.-  | 36       | 40       | 86      | 48       | 78       | 65       | 57       | 69       | 67       | 52       | 54       | 61       | 26       | 68      | 35       | 92       | 36       | 82       | 61       |
| 4.2.1.17 | 5        | 3        | 5       | 7        | 7        | 8        | 2        | 8        | 3        | 3        | 5        | 4        | 2        | 6       | 4        | 8        | 3        | 5        | 5        |
| 4.2.1.80 | 0        | 0        | 0       | 0        | 0        | 1        | 0        | 0        | 0        | 0        | 0        | 0        | 0        | 0       | 1        | 0        | 0        | 0        | 0        |
| 4.2.1.83 | 0        | 0        | 0       | 0        | 0        | 1        | 2        | 1        | 0        | 0        | 0        | 0        | 0        | 1       | 0        | 1        | 0        | 1        | 0        |
| 4.2.1.84 | 0        | 0        | 0       | 0        | 0        | 0        | 1        | 1        | 0        | 0        | 0        | 0        | 0        | 0       | 0        | 1        | 0        | 2        | 0        |
| 5.1.2.2  | 0        | 0        | 0       | 0        | 0        | 0        | 0        | 0        | 0        | 0        | 0        | 0        | 0        | 0       | 0        | 0        | 0        | 0        | 0        |
| 5.2.1.2  | 0        | 0        | 0       | 0        | 0        | 0        | 0        | 0        | 0        | 0        | 0        | 0        | 0        | 0       | 0        | 0        | 0        | 0        | 0        |
| 5.3.3.4  | 0        | 0        | 0       | 0        | 1        | 1        | 0        | 0        | 0        | 0        | 0        | 0        | 0        | 0       | 0        | 0        | 0        | 0        | 0        |
| 5.3.99.- | 1        | 4        | 5       | 2        | 6        | 2        | 4        | 2        | 5        | 5        | 6        | 4        | 4        | 2       | 3        | 5        | 0        | 4        | 5        |
| 5.4.99.- | 0        | 0        | 0       | 0        | 2        | 1        | 1        | 0        | 1        | 0        | 0        | 1        | 1        | 1       | 0        | 0        | 1        | 1        | 0        |
| 5.5.1.1  | 2        | 3        | 3       | 3        | 4        | 3        | 3        | 3        | 6        | 2        | 3        | 3        | 1        | 2       | 2        | 6        | 3        | 3        | 4        |
| 5.5.1.2  | 0        | 0        | 0       | 0        | 0        | 0        | 0        | 0        | 0        | 0        | 0        | 0        | 0        | 0       | 0        | 0        | 0        | 0        | 0        |
| 6.2.1.-  | 0        | 0        | 0       | 0        | 0        | 0        | 0        | 0        | 0        | 0        | 0        | 0        | 0        | 0       | 0        | 0        | 0        | 0        | 0        |
| 6.3.5.2  | 13       | 15       | 19      | 13       | 22       | 22       | 23       | 22       | 15       | 13       | 20       | 18       | 10       | 31      | 9        | 38       | 14       | 24       | 24       |
| K00002   | 1        | 2        | 2       | 0        | 2        | 1        | 3        | 0        | 1        | 1        | 4        | 1        | 0        | 1       | 1        | 2        | 1        | 0        | 3        |
| K00055   | 0        | 0        | 0       | 0        | 0        | 0        | 0        | 0        | 0        | 0        | 0        | 0        | 0        | 0       | 0        | 0        | 0        | 0        | 0        |
| K00074   | 5        | 2        | 5       | 2        | 6        | 7        | 3        | 7        | 0        | 3        | 3        | 6        | 3        | 4       | 3        | 11       | 2        | 10       | 11       |
| K00088   | 14       | 8        | 20      | 8        | 13       | 17       | 19       | 16       | 16       | 15       | 16       | 8        | 9        | 24      | 9        | 31       | 9        | 22       | 21       |
| K00100   | 35       | 36       | 81      | 44       | 83       | 55       | 76       | 64       | 44       | 46       | 60       | 62       | 21       | 74      | 30       | 99       | 38       | 88       | 62       |
| K00128   | 0        | 0        | 0       | 0        | 2        | 3        | 2        | 0        | 1        | 0        | 5        | 1        | 1        | 1       | 1        | 2        | 0        | 4        | 5        |
| K00129   | 0        | 0        | 0       | 0        | 0        | 0        | 0        | 0        | 0        | 0        | 0        | 0        | 0        | 0       | 0        | 0        | 0        | 0        | 0        |
| K00132   | 0        | 0        | 0       | 0        | 0        | 0        | 0        | 0        | 0        | 1        | 1        | 0        | 0        | 1       | 0        | 2        | 0        | 1        | 1        |
| K00141   | 0        | 0        | 0       | 0        | 0        | 0        | 0        | 0        | 0        | 0        | 0        | 0        | 0        | 0       | 0        | 0        | 0        | 0        | 0        |
| K00146   | 0        | 0        | 0       | 0        | 0        | 0        | 0        | 0        | 0        | 0        | 0        | 0        | 0        | 0       | 0        | 0        | 0        | 0        | 0        |
| K00148   | 0        | 0        | 0       | 0        | 0        | 0        | 0        | 0        | 0        | 0        | 0        | 0        | 0        | 0       | 0        | 0        | 0        | 0        | 0        |
| K00155   | 0        | 0        | 0       | 1        | 0        | 0        | 1        | 0        | 0        | 0        | 0        | 0        | 0        | 0       | 0        | 1        | 0        | 0        | 0        |
| K00169   | 0        | 0        | 0       | 1        | 4        | 1        | 3        | 2        | 0        | 0        | 0        | 1        | 1        | 3       | 0        | 8        | 1        | 3        | 1        |
| K00224   | 0        | 0        | 1       | 1        | 1        | 0        | 1        | 1        | 0        | 0        | 1        | 0        | 0        | 2       | 0        | 1        | 1        | 0        | 0        |
| K00274   | 0        | 0        | 0       | 0        | 0        | 0        | 0        | 0        | 0        | 0        | 0        | 0        | 0        | 0       | 0        | 0        | 0        | 0        | 0        |
| K00446   | 0        | 0        | 0       | 0        | 0        | 0        | 0        | 0        | 0        | 0        | 0        | 0        | 0        | 0       | 0        | 0        | 0        | 0        | 0        |
| K00448   | 0        | 0        | 0       | 0        | 0        | 0        | 0        | 0        | 0        | 0        | 0        | 0        | 0        | 0       | 0        | 0        | 0        | 0        | 0        |
| K00462   | 1        | 0        | 0       | 1        | 1        | 1        | 2        | 3        | 1        | 1        | 3        | 2        | 2        | 1       | 0        | 2        | 0        | 1        | 1        |
| K00480   | 0        | 0        | 0       | 0        | 0        | 0        | 0        | 0        | 0        | 0        | 0        | 0        | 0        | 0       | 0        | 0        | 0        | 0        | 0        |
| K00481   | 0        | 0        | 0       | 0        | 0        | 0        | 0        | 0        | 0        | 0        | 0        | 0        | 0        | 0       | 0        | 0        | 0        | 0        | 0        |
| K00539   | 0        | 0        | 0       | 1        | 1        | 0        | 0        | 1        | 1        | 1        | 3        | 0        | 1        | 1       | 0        | 0        | 2        | 1        | 0        |
| K00599   | 25       | 31       | 66      | 30       | 55       | 52       | 55       | 46       | 31       | 37       | 44       | 55       | 20       | 41      | 20       | 72       | 23       | 58       | 43       |
| K00626   | 2        | 2        | 3       | 1        | 0        | 4        | 4        | 4        | 2        | 5        | 3        | 2        | 1        | 3       | 1        | 5        | 3        | 5        | 4        |
| K00632   | 0        | 0        | 0       | 0        | 0        | 0        | 0        | 0        | 0        | 0        | 0        | 0        | 0        | 0       | 0        | 0        | 0        | 0        | 0        |
| K00680   | 31       | 37       | 82      | 44       | 67       | 45       | 52       | 51       | 52       | 20       | 45       | 44       | 28       | 62      | 35       | 79       | 33       | 68       | 61       |
| K00757   | 7        | 6        | 15      | 10       | 12       | 10       | 10       | 22       | 14       | 10       | 12       | 13       | 6        | 15      | 6        | 22       | 7        | 21       | 17       |
| K00758   | 0        | 1        | 5       | 0        | 3        | 3        | 2        | 1        | 2        | 1        | 1        | 6        | 0        | 5       | 2        | 1        | 2        | 5        | 1        |
| K00760   | 21       | 15       | 35      | 18       | 37       | 26       | 33       | 21       | 20       | 16       | 23       | 28       | 9        | 30      | 10       | 40       | 11       | 43       | 25       |
| K00799   | 0        | 0        | 0       | 0        | 0        | 3        | 0        | 0        | 0        | 0        | 0        | 1        | 0        | 0       | 0        | 0        | 0        | 0        | 0        |
| K00857   | 7        | 8        | 32      | 9        | 20       | 14       | 14       | 13       | 13       | 5        | 15       | 14       | 4        | 13      | 7        | 17       | 7        | 21       | 15       |
| K00876   | 24       | 15       | 50      | 22       | 37       | 35       | 37       | 30       | 26       | 18       | 34       | 31       | 9        | 38      | 15       | 56       | 18       | 46       | 29       |
| K01026   | 0        | 1        | 3       | 0        | 1        | 1        | 0        | 0        | 0        | 0        | 2        | 1        | 0        | 0       | 1        | 0        | 0        | 0        | 3        |
| K01031   | 0        | 0        | 0       | 0        | 0        | 0        | 0        | 0        | 0        | 0        | 0        | 0        | 0        | 0       | 0        | 0        | 0        | 0        | 0        |



| EC/KO  | AM-AD-28 | AM-AD-29 | AM-AD-3 | AM-AD-30 | AM-AD-31 | AM-AD-32 | AM-AD-33 | AM-AD-34 | AM-AD-35 | AM-AD-36 | AM-AD-37 | AM-AD-38 | AM-AD-39 | AM-AD-4 | AM-AD-40 | AM-AD-41 | AM-AD-42 | AM-AD-43 | AM-AD-44 |
|--------|----------|----------|---------|----------|----------|----------|----------|----------|----------|----------|----------|----------|----------|---------|----------|----------|----------|----------|----------|
| K01034 | 1        | 0        | 4       | 0        | 2        | 2        | 2        | 1        | 1        | 1        | 3        | 3        | 0        | 2       | 0        | 1        | 1        | 4        | 3        |
| K01039 | 0        | 1        | 0       | 0        | 0        | 0        | 0        | 0        | 0        | 0        | 1        | 0        | 1        | 2       | 1        | 0        | 1        | 0        | 0        |
| K01041 | 1        | 1        | 5       | 1        | 3        | 3        | 7        | 11       | 4        | 3        | 2        | 1        | 4        | 6       | 4        | 6        | 4        | 7        | 7        |
| K01053 | 0        | 0        | 0       | 0        | 1        | 0        | 0        | 0        | 0        | 0        | 0        | 0        | 0        | 0       | 1        | 0        | 0        | 0        | 0        |
| K01055 | 0        | 0        | 0       | 0        | 0        | 0        | 0        | 0        | 0        | 0        | 0        | 0        | 0        | 0       | 0        | 0        | 0        | 0        | 0        |
| K01061 | 0        | 0        | 0       | 0        | 0        | 2        | 0        | 0        | 0        | 0        | 0        | 0        | 0        | 0       | 0        | 0        | 0        | 0        | 1        |
| K01066 | 4        | 4        | 8       | 8        | 10       | 7        | 9        | 7        | 11       | 4        | 9        | 8        | 3        | 11      | 7        | 8        | 5        | 12       | 11       |
| K01075 | 1        | 0        | 0       | 1        | 1        | 1        | 1        | 2        | 1        | 0        | 2        | 0        | 1        | 0       | 0        | 1        | 0        | 0        | 1        |
| K01077 | 7        | 5        | 16      | 10       | 20       | 12       | 14       | 16       | 16       | 5        | 8        | 5        | 3        | 12      | 10       | 16       | 11       | 15       | 12       |
| K01101 | 3        | 3        | 7       | 1        | 5        | 3        | 7        | 3        | 3        | 3        | 7        | 1        | 1        | 9       | 2        | 6        | 1        | 9        | 6        |
| K01195 | 3        | 6        | 9       | 7        | 11       | 13       | 13       | 8        | 11       | 4        | 8        | 10       | 4        | 13      | 5        | 17       | 6        | 11       | 8        |
| K01426 | 0        | 0        | 1       | 1        | 1        | 1        | 2        | 2        | 0        | 1        | 1        | 0        | 1        | 2       | 1        | 2        | 0        | 2        | 0        |
| K01428 | 0        | 0        | 0       | 2        | 0        | 1        | 0        | 1        | 0        | 1        | 1        | 1        | 0        | 2       | 1        | 2        | 1        | 2        | 1        |
| K01457 | 0        | 0        | 0       | 0        | 0        | 0        | 0        | 0        | 0        | 0        | 0        | 0        | 0        | 0       | 0        | 0        | 0        | 0        | 0        |
| K01464 | 1        | 0        | 0       | 1        | 1        | 5        | 0        | 1        | 0        | 1        | 5        | 0        | 2        | 0       | 0        | 1        | 0        | 2        | 2        |
| K01489 | 15       | 13       | 44      | 15       | 29       | 23       | 34       | 27       | 15       | 12       | 22       | 31       | 10       | 19      | 13       | 31       | 13       | 37       | 18       |
| K01500 | 0        | 0        | 1       | 0        | 0        | 0        | 0        | 0        | 0        | 0        | 0        | 0        | 0        | 1       | 0        | 0        | 0        | 0        | 0        |
| K01501 | 1        | 2        | 2       | 0        | 2        | 0        | 3        | 2        | 0        | 1        | 4        | 0        | 2        | 1       | 0        | 0        | 0        | 3        | 0        |
| K01502 | 0        | 0        | 0       | 0        | 0        | 0        | 0        | 0        | 0        | 0        | 0        | 0        | 0        | 0       | 0        | 0        | 0        | 0        | 0        |
| K01512 | 5        | 7        | 12      | 6        | 11       | 8        | 5        | 7        | 2        | 7        | 10       | 13       | 3        | 10      | 9        | 10       | 1        | 7        | 6        |
| K01560 | 4        | 2        | 9       | 1        | 10       | 6        | 4        | 5        | 1        | 2        | 12       | 8        | 3        | 6       | 2        | 5        | 1        | 11       | 7        |
| K01561 | 0        | 1        | 0       | 0        | 0        | 0        | 1        | 1        | 0        | 2        | 0        | 0        | 1        | 1       | 0        | 1        | 1        | 0        | 1        |
| K01563 | 0        | 0        | 1       | 0        | 0        | 0        | 0        | 0        | 1        | 0        | 0        | 0        | 0        | 0       | 0        | 0        | 0        | 0        | 0        |
| K01564 | 0        | 1        | 1       | 0        | 4        | 2        | 2        | 4        | 1        | 1        | 0        | 1        | 1        | 4       | 0        | 4        | 1        | 2        | 0        |
| K01607 | 17       | 16       | 34      | 11       | 24       | 12       | 11       | 12       | 21       | 6        | 17       | 21       | 9        | 22      | 12       | 27       | 12       | 25       | 19       |
| K01612 | 0        | 0        | 0       | 0        | 0        | 0        | 0        | 0        | 0        | 0        | 0        | 0        | 0        | 0       | 0        | 0        | 0        | 0        | 0        |
| K01615 | 10       | 9        | 10      | 7        | 9        | 12       | 12       | 10       | 11       | 7        | 12       | 8        | 2        | 20      | 15       | 26       | 7        | 13       | 16       |
| K01617 | 0        | 0        | 0       | 0        | 0        | 0        | 0        | 0        | 0        | 0        | 0        | 0        | 0        | 0       | 0        | 0        | 0        | 0        | 0        |
| K01666 | 5        | 2        | 6       | 4        | 8        | 8        | 7        | 2        | 4        | 4        | 3        | 5        | 0        | 5       | 2        | 10       | 2        | 2        | 5        |
| K01692 | 0        | 0        | 0       | 0        | 0        | 1        | 0        | 0        | 1        | 0        | 0        | 0        | 0        | 1       | 0        | 0        | 0        | 0        | 0        |
| K01721 | 0        | 0        | 0       | 0        | 0        | 0        | 0        | 0        | 0        | 0        | 0        | 0        | 0        | 0       | 0        | 0        | 0        | 0        | 0        |
| K01726 | 9        | 7        | 22      | 11       | 13       | 9        | 8        | 17       | 8        | 7        | 7        | 6        | 5        | 8       | 4        | 9        | 3        | 12       | 8        |
| K01781 | 1        | 1        | 0       | 1        | 0        | 1        | 0        | 0        | 0        | 2        | 0        | 0        | 0        | 1       | 0        | 1        | 0        | 0        | 1        |
| K01821 | 5        | 3        | 3       | 0        | 2        | 2        | 1        | 2        | 2        | 1        | 2        | 1        | 2        | 3       | 1        | 2        | 1        | 2        | 2        |
| K01856 | 0        | 0        | 0       | 0        | 0        | 0        | 0        | 0        | 0        | 0        | 0        | 0        | 0        | 0       | 0        | 0        | 0        | 0        | 0        |
| K01857 | 0        | 0        | 0       | 0        | 0        | 0        | 1        | 0        | 0        | 0        | 1        | 0        | 0        | 1       | 0        | 1        | 0        | 0        | 0        |
| K01913 | 1        | 0        | 0       | 0        | 0        | 0        | 0        | 0        | 0        | 0        | 0        | 1        | 0        | 0       | 0        | 0        | 0        | 0        | 0        |
| K01951 | 10       | 5        | 14      | 10       | 10       | 20       | 13       | 16       | 14       | 8        | 14       | 10       | 8        | 23      | 8        | 26       | 11       | 19       | 18       |
| K02554 | 0        | 0        | 0       | 0        | 0        | 0        | 0        | 0        | 0        | 0        | 0        | 0        | 0        | 0       | 0        | 0        | 0        | 0        | 1        |
| K03381 | 0        | 0        | 0       | 0        | 0        | 0        | 0        | 0        | 0        | 0        | 0        | 0        | 0        | 0       | 0        | 0        | 0        | 0        | 0        |
| K03382 | 0        | 1        | 1       | 0        | 0        | 1        | 0        | 0        | 0        | 0        | 2        | 2        | 1        | 0       | 0        | 1        | 0        | 2        | 1        |
| K03464 | 0        | 0        | 0       | 0        | 0        | 1        | 0        | 0        | 0        | 0        | 0        | 0        | 0        | 0       | 0        | 0        | 0        | 0        | 0        |
| K03518 | 9        | 4        | 12      | 2        | 16       | 12       | 7        | 11       | 1        | 13       | 12       | 30       | 4        | 6       | 6        | 13       | 1        | 12       | 13       |
| K03862 | 0        | 0        | 0       | 0        | 0        | 0        | 0        | 0        | 0        | 0        | 0        | 0        | 0        | 0       | 0        | 0        | 0        | 0        | 0        |
| K04099 | 0        | 0        | 0       | 0        | 0        | 0        | 0        | 0        | 0        | 0        | 0        | 0        | 0        | 0       | 0        | 0        | 0        | 0        | 0        |
| K04100 | 0        | 0        | 0       | 0        | 0        | 0        | 0        | 0        | 0        | 0        | 0        | 0        | 0        | 0       | 0        | 0        | 0        | 0        | 0        |
| K04102 | 0        | 0        | 0       | 0        | 0        | 0        | 0        | 0        | 0        | 0        | 0        | 0        | 0        | 0       | 0        | 0        | 0        | 0        | 0        |
| K04116 | 0        | 0        | 0       | 0        | 0        | 0        | 0        | 0        | 0        | 0        | 0        | 0        | 0        | 0       | 0        | 0        | 0        | 0        | 0        |
| K05394 | 0        | 0        | 1       | 1        | 1        | 1        | 1        | 1        | 0        | 0        | 1        | 0        | 0        | 1       | 3        | 0        | 1        | 2        | 0        |

| EC/KO  | AM-AD-28 | AM-AD-29 | AM-AD-3 | AM-AD-30 | AM-AD-31 | AM-AD-32 | AM-AD-33 | AM-AD-34 | AM-AD-35 | AM-AD-36 | AM-AD-37 | AM-AD-38 | AM-AD-39 | AM-AD-4 | AM-AD-40 | AM-AD-41 | AM-AD-42 | AM-AD-43 | AM-AD-44 |
|--------|----------|----------|---------|----------|----------|----------|----------|----------|----------|----------|----------|----------|----------|---------|----------|----------|----------|----------|----------|
| K05549 | 0        | 0        | 0       | 0        | 0        | 0        | 0        | 0        | 0        | 0        | 0        | 0        | 0        | 0       | 0        | 0        | 0        | 0        | 0        |
| K05783 | 0        | 0        | 0       | 0        | 0        | 0        | 0        | 0        | 0        | 0        | 0        | 0        | 0        | 0       | 0        | 0        | 0        | 0        | 0        |
| K05797 | 0        | 0        | 0       | 0        | 0        | 0        | 0        | 0        | 0        | 0        | 0        | 0        | 0        | 0       | 0        | 0        | 0        | 0        | 0        |
| K06281 | 0        | 0        | 2       | 3        | 4        | 2        | 3        | 3        | 3        | 2        | 2        | 0        | 2        | 4       | 2        | 1        | 2        | 2        | 3        |
| K06446 | 6        | 4        | 4       | 1        | 4        | 6        | 5        | 6        | 2        | 4        | 1        | 3        | 2        | 6       | 2        | 7        | 1        | 5        | 2        |
| K06912 | 0        | 0        | 0       | 0        | 0        | 0        | 0        | 0        | 0        | 0        | 0        | 0        | 0        | 0       | 0        | 0        | 0        | 0        | 0        |
| K07535 | 0        | 0        | 0       | 1        | 1        | 0        | 0        | 0        | 0        | 0        | 0        | 0        | 0        | 0       | 0        | 0        | 0        | 0        | 0        |
| K07536 | 1        | 1        | 7       | 1        | 3        | 3        | 3        | 3        | 3        | 1        | 5        | 0        | 3        | 3       | 2        | 3        | 3        | 1        | 4        |
| K08689 | 0        | 0        | 0       | 0        | 0        | 0        | 0        | 0        | 0        | 0        | 0        | 0        | 0        | 0       | 0        | 0        | 0        | 0        | 0        |
| K08710 | 0        | 0        | 0       | 0        | 1        | 0        | 0        | 0        | 0        | 0        | 0        | 0        | 0        | 0       | 0        | 0        | 0        | 0        | 0        |
| K09461 | 0        | 0        | 0       | 0        | 1        | 0        | 0        | 0        | 0        | 0        | 1        | 0        | 0        | 0       | 0        | 0        | 0        | 0        | 0        |
| K10217 | 0        | 0        | 0       | 0        | 0        | 1        | 0        | 0        | 0        | 0        | 0        | 0        | 0        | 0       | 0        | 0        | 0        | 0        | 0        |
| K10218 | 0        | 0        | 0       | 0        | 0        | 0        | 0        | 0        | 0        | 1        | 0        | 0        | 0        | 1       | 0        | 0        | 0        | 0        | 0        |
| K10220 | 0        | 0        | 0       | 0        | 0        | 0        | 0        | 0        | 0        | 0        | 0        | 0        | 0        | 0       | 0        | 0        | 0        | 0        | 0        |
| K11180 | 0        | 0        | 0       | 0        | 1        | 0        | 0        | 0        | 0        | 0        | 0        | 0        | 0        | 0       | 0        | 0        | 0        | 0        | 0        |
| K13953 | 0        | 0        | 0       | 0        | 1        | 1        | 0        | 0        | 0        | 0        | 0        | 0        | 0        | 0       | 1        | 0        | 0        | 0        | 0        |
| K14333 | 0        | 0        | 0       | 0        | 0        | 0        | 0        | 0        | 0        | 0        | 0        | 0        | 0        | 0       | 0        | 0        | 0        | 0        | 0        |
| K14519 | 0        | 0        | 0       | 0        | 0        | 0        | 0        | 0        | 0        | 0        | 0        | 0        | 0        | 0       | 0        | 0        | 0        | 0        | 0        |
| K15054 | 0        | 0        | 0       | 0        | 0        | 1        | 0        | 0        | 0        | 0        | 0        | 0        | 0        | 0       | 0        | 0        | 0        | 0        | 0        |
| K16173 | 0        | 0        | 0       | 0        | 0        | 0        | 1        | 1        | 0        | 0        | 0        | 0        | 0        | 0       | 0        | 0        | 0        | 0        | 0        |
| K16514 | 0        | 1        | 0       | 0        | 0        | 1        | 0        | 1        | 0        | 1        | 0        | 0        | 0        | 0       | 0        | 0        | 0        | 0        | 1        |
| K16874 | 0        | 0        | 0       | 0        | 0        | 0        | 0        | 0        | 0        | 0        | 0        | 0        | 0        | 0       | 0        | 0        | 0        | 0        | 1        |

| EC/KO      | AM-AD-45 | AM-AD-46 | AM-AD-47 | AM-AD-48 | AM-AD-49 | AM-AD-5 | AM-AD-50 | AM-AD-51 | AM-AD-52 | AM-AD-53 | AM-AD-54 | AM-AD-55 | AM-AD-56 | AM-AD-57 | AM-AD-58 | AM-AD-59 | AM-AD-6 | AM-AD-60 | AM-AD-61 |
|------------|----------|----------|----------|----------|----------|---------|----------|----------|----------|----------|----------|----------|----------|----------|----------|----------|---------|----------|----------|
| 1.1.1.-    | 42       | 41       | 43       | 114      | 95       | 49      | 86       | 66       | 85       | 56       | 83       | 34       | 67       | 41       | 25       | 44       | 20      | 85       | 32       |
| 1.1.1.1    | 25       | 15       | 17       | 54       | 59       | 25      | 56       | 30       | 59       | 26       | 65       | 19       | 51       | 23       | 21       | 28       | 6       | 61       | 20       |
| 1.1.1.157  | 2        | 2        | 0        | 5        | 1        | 1       | 3        | 1        | 2        | 2        | 1        | 1        | 2        | 2        | 1        | 2        | 0       | 5        | 0        |
| 1.1.1.205  | 22       | 14       | 14       | 38       | 36       | 21      | 38       | 23       | 34       | 16       | 39       | 6        | 33       | 10       | 12       | 13       | 5       | 43       | 8        |
| 1.1.1.35   | 3        | 2        | 1        | 7        | 5        | 1       | 5        | 2        | 6        | 0        | 5        | 2        | 1        | 2        | 0        | 1        | 0       | 5        | 0        |
| 1.12.99.6  | 3        | 3        | 3        | 2        | 5        | 1       | 3        | 3        | 5        | 0        | 4        | 0        | 2        | 1        | 2        | 0        | 0       | 4        | 0        |
| 1.13.11.-  | 0        | 0        | 0        | 0        | 0        | 0       | 0        | 0        | 0        | 0        | 0        | 0        | 0        | 0        | 0        | 0        | 0       | 0        | 0        |
| 1.13.11.1  | 0        | 0        | 0        | 0        | 0        | 0       | 0        | 0        | 0        | 0        | 0        | 0        | 0        | 0        | 0        | 0        | 0       | 0        | 0        |
| 1.13.11.2  | 0        | 0        | 0        | 0        | 0        | 0       | 0        | 0        | 0        | 0        | 0        | 0        | 0        | 0        | 0        | 0        | 0       | 0        | 0        |
| 1.13.11.3  | 0        | 0        | 0        | 0        | 0        | 0       | 0        | 0        | 0        | 0        | 0        | 0        | 0        | 0        | 0        | 0        | 0       | 0        | 0        |
| 1.13.11.39 | 0        | 0        | 0        | 0        | 0        | 0       | 0        | 0        | 0        | 0        | 0        | 0        | 0        | 0        | 0        | 0        | 0       | 0        | 0        |
| 1.13.11.5  | 0        | 0        | 0        | 0        | 0        | 1       | 0        | 0        | 0        | 0        | 0        | 0        | 0        | 0        | 0        | 0        | 0       | 0        | 0        |
| 1.13.11.8  | 0        | 0        | 0        | 0        | 0        | 0       | 0        | 0        | 0        | 0        | 0        | 0        | 0        | 0        | 0        | 0        | 0       | 0        | 0        |
| 1.14.12.10 | 0        | 1        | 0        | 0        | 0        | 0       | 0        | 0        | 0        | 0        | 0        | 1        | 1        | 1        | 0        | 0        | 0       | 1        | 0        |
| 1.14.12.13 | 0        | 0        | 0        | 0        | 0        | 0       | 0        | 0        | 0        | 0        | 0        | 0        | 0        | 0        | 0        | 0        | 0       | 0        | 0        |
| 1.14.12.18 | 0        | 0        | 0        | 0        | 0        | 0       | 0        | 0        | 0        | 0        | 0        | 0        | 0        | 0        | 0        | 0        | 0       | 0        | 0        |
| 1.14.13.-  | 0        | 0        | 1        | 0        | 1        | 0       | 1        | 0        | 0        | 0        | 0        | 0        | 0        | 0        | 1        | 0        | 0       | 1        | 0        |
| 1.14.13.1  | 0        | 0        | 0        | 0        | 0        | 0       | 0        | 0        | 0        | 0        | 0        | 0        | 0        | 0        | 0        | 0        | 0       | 0        | 0        |
| 1.14.13.2  | 0        | 0        | 0        | 0        | 0        | 0       | 0        | 0        | 0        | 0        | 0        | 0        | 0        | 0        | 0        | 0        | 0       | 0        | 0        |
| 1.14.13.50 | 0        | 0        | 0        | 0        | 0        | 0       | 0        | 0        | 0        | 0        | 0        | 0        | 0        | 0        | 0        | 0        | 0       | 0        | 0        |
| 1.14.13.7  | 0        | 0        | 0        | 1        | 0        | 0       | 0        | 0        | 0        | 0        | 0        | 1        | 0        | 0        | 1        | 1        | 0       | 0        | 0        |
| 1.14.13.8  | 0        | 0        | 0        | 0        | 0        | 0       | 0        | 0        | 0        | 0        | 0        | 0        | 0        | 0        | 0        | 0        | 0       | 0        | 0        |
| 1.14.13.82 | 0        | 0        | 0        | 0        | 0        | 0       | 0        | 0        | 0        | 0        | 0        | 0        | 0        | 0        | 0        | 0        | 0       | 0        | 0        |
| 1.14.99.-  | 0        | 0        | 0        | 0        | 0        | 0       | 0        | 0        | 0        | 0        | 0        | 0        | 0        | 0        | 0        | 0        | 0       | 0        | 0        |
| 1.17.99.1  | 0        | 0        | 0        | 0        | 0        | 0       | 0        | 0        | 0        | 0        | 0        | 0        | 0        | 0        | 0        | 0        | 0       | 0        | 0        |
| 1.18.6.1   | 0        | 0        | 0        | 0        | 0        | 0       | 0        | 0        | 0        | 0        | 0        | 0        | 2        | 0        | 0        | 0        | 0       | 0        | 0        |
| 1.2.1.-    | 0        | 0        | 0        | 0        | 0        | 0       | 0        | 0        | 0        | 0        | 0        | 0        | 0        | 0        | 0        | 0        | 0       | 0        | 0        |
| 1.2.1.10   | 4        | 5        | 4        | 10       | 11       | 3       | 12       | 2        | 4        | 1        | 10       | 2        | 2        | 2        | 2        | 5        | 1       | 11       | 0        |
| 1.2.1.3    | 4        | 6        | 5        | 17       | 17       | 8       | 15       | 10       | 16       | 7        | 9        | 6        | 10       | 6        | 3        | 10       | 2       | 13       | 0        |
| 1.2.1.39   | 0        | 0        | 0        | 0        | 0        | 0       | 0        | 0        | 0        | 0        | 0        | 0        | 0        | 0        | 0        | 0        | 0       | 0        | 0        |
| 1.2.7.1    | 5        | 10       | 6        | 23       | 15       | 8       | 19       | 15       | 15       | 11       | 37       | 7        | 17       | 5        | 5        | 5        | 6       | 30       | 3        |
| 1.2.99.2   | 1        | 2        | 0        | 5        | 9        | 0       | 8        | 3        | 5        | 3        | 6        | 2        | 2        | 3        | 2        | 3        | 0       | 9        | 1        |
| 1.3.1.-    | 0        | 0        | 1        | 1        | 1        | 0       | 1        | 1        | 0        | 1        | 0        | 0        | 1        | 1        | 0        | 0        | 0       | 1        | 0        |
| 1.3.1.2    | 2        | 1        | 1        | 2        | 1        | 2       | 0        | 0        | 2        | 1        | 2        | 0        | 1        | 2        | 1        | 0        | 0       | 2        | 0        |
| 1.3.1.25   | 0        | 0        | 0        | 0        | 0        | 0       | 0        | 0        | 0        | 0        | 0        | 0        | 0        | 0        | 0        | 0        | 0       | 0        | 0        |
| 1.3.99.-   | 0        | 0        | 0        | 0        | 0        | 0       | 2        | 0        | 0        | 0        | 0        | 0        | 0        | 0        | 0        | 0        | 0       | 0        | 0        |
| 1.6.5.-    | 49       | 46       | 58       | 92       | 76       | 44      | 71       | 51       | 56       | 39       | 80       | 35       | 76       | 50       | 33       | 39       | 21      | 95       | 33       |
| 1.7.1.-    | 11       | 10       | 9        | 22       | 15       | 8       | 8        | 14       | 11       | 6        | 24       | 5        | 12       | 9        | 4        | 6        | 3       | 21       | 7        |
| 1.8.99.3   | 0        | 0        | 0        | 2        | 0        | 0       | 2        | 0        | 0        | 0        | 0        | 1        | 1        | 0        | 0        | 0        | 0       | 1        | 0        |
| 2.1.1.-    | 193      | 162      | 211      | 538      | 441      | 211     | 480      | 335      | 466      | 228      | 509      | 137      | 423      | 177      | 126      | 193      | 79      | 549      | 145      |
| 2.3.1.-    | 157      | 135      | 142      | 311      | 282      | 134     | 268      | 236      | 248      | 150      | 289      | 117      | 227      | 143      | 92       | 131      | 71      | 318      | 96       |
| 2.3.1.16   | 0        | 1        | 0        | 5        | 2        | 2       | 3        | 3        | 1        | 0        | 2        | 3        | 6        | 0        | 0        | 0        | 0       | 1        | 1        |
| 2.3.1.5    | 0        | 0        | 0        | 0        | 0        | 0       | 0        | 0        | 0        | 0        | 0        | 0        | 0        | 0        | 0        | 0        | 0       | 0        | 0        |
| 2.3.1.9    | 3        | 0        | 0        | 2        | 1        | 2       | 1        | 0        | 1        | 1        | 1        | 0        | 2        | 0        | 1        | 0        | 0       | 2        | 0        |
| 2.4.2.10   | 13       | 11       | 10       | 25       | 22       | 10      | 22       | 18       | 22       | 14       | 30       | 6        | 20       | 6        | 5        | 14       | 4       | 25       | 10       |
| 2.4.2.3    | 1        | 5        | 3        | 14       | 15       | 6       | 22       | 6        | 20       | 10       | 12       | 1        | 9        | 1        | 0        | 3        | 1       | 24       | 2        |
| 2.4.2.4    | 1        | 0        | 3        | 8        | 5        | 3       | 11       | 2        | 17       | 4        | 15       | 2        | 6        | 4        | 1        | 2        | 0       | 15       | 3        |
| 2.4.2.8    | 8        | 12       | 13       | 26       | 27       | 12      | 27       | 15       | 25       | 10       | 24       | 7        | 21       | 13       | 8        | 9        | 5       | 38       | 8        |
| 2.5.1.-    | 21       | 21       | 24       | 38       | 32       | 16      | 37       | 25       | 34       | 20       | 50       | 17       | 34       | 24       | 17       | 15       | 8       | 46       | 10       |

| EC/KO    | AM-AD-45 | AM-AD-46 | AM-AD-47 | AM-AD-48 | AM-AD-49 | AM-AD-5 | AM-AD-50 | AM-AD-51 | AM-AD-52 | AM-AD-53 | AM-AD-54 | AM-AD-55 | AM-AD-56 | AM-AD-57 | AM-AD-58 | AM-AD-59 | AM-AD-6 | AM-AD-60 | AM-AD-61 |
|----------|----------|----------|----------|----------|----------|---------|----------|----------|----------|----------|----------|----------|----------|----------|----------|----------|---------|----------|----------|
| 2.5.1.18 | 1        | 0        | 0        | 0        | 3        | 0       | 2        | 1        | 2        | 0        | 0        | 0        | 0        | 0        | 0        | 0        | 0       | 4        | 0        |
| 2.6.1.-  | 32       | 27       | 28       | 63       | 41       | 27      | 60       | 51       | 55       | 20       | 81       | 32       | 56       | 27       | 15       | 33       | 19      | 79       | 17       |
| 2.7.1.21 | 7        | 5        | 10       | 17       | 12       | 5       | 14       | 10       | 12       | 7        | 26       | 5        | 12       | 7        | 5        | 6        | 3       | 12       | 7        |
| 2.7.1.48 | 23       | 26       | 26       | 65       | 47       | 23      | 53       | 38       | 48       | 31       | 72       | 23       | 50       | 30       | 16       | 20       | 13      | 62       | 19       |
| 2.7.4.-  | 17       | 15       | 17       | 31       | 31       | 11      | 32       | 21       | 27       | 17       | 36       | 10       | 26       | 15       | 4        | 14       | 5       | 42       | 16       |
| 2.8.3.-  | 1        | 0        | 1        | 5        | 1        | 1       | 2        | 3        | 4        | 1        | 0        | 1        | 3        | 0        | 1        | 1        | 0       | 4        | 0        |
| 2.8.3.1  | 0        | 0        | 0        | 1        | 1        | 0       | 0        | 0        | 0        | 0        | 0        | 0        | 0        | 0        | 0        | 0        | 1       | 0        | 0        |
| 2.8.3.12 | 0        | 2        | 0        | 1        | 0        | 0       | 1        | 1        | 1        | 2        | 0        | 0        | 2        | 0        | 0        | 0        | 0       | 2        | 2        |
| 2.8.3.6  | 3        | 2        | 2        | 4        | 0        | 0       | 0        | 1        | 2        | 0        | 1        | 0        | 0        | 0        | 0        | 1        | 0       | 1        | 1        |
| 2.8.3.8  | 0        | 3        | 1        | 5        | 1        | 0       | 3        | 8        | 4        | 1        | 3        | 0        | 0        | 1        | 1        | 0        | 0       | 1        | 0        |
| 3.1.1.-  | 6        | 1        | 3        | 12       | 5        | 5       | 8        | 11       | 6        | 4        | 8        | 7        | 7        | 5        | 4        | 5        | 1       | 9        | 3        |
| 3.1.1.1  | 7        | 4        | 8        | 14       | 12       | 5       | 9        | 10       | 14       | 7        | 15       | 3        | 8        | 9        | 6        | 7        | 4       | 10       | 3        |
| 3.1.1.17 | 1        | 3        | 5        | 2        | 4        | 3       | 3        | 1        | 2        | 2        | 3        | 3        | 2        | 4        | 3        | 3        | 1       | 3        | 0        |
| 3.1.1.2  | 0        | 1        | 0        | 0        | 0        | 0       | 0        | 0        | 0        | 1        | 1        | 0        | 0        | 0        | 0        | 0        | 0       | 0        | 0        |
| 3.1.1.24 | 0        | 1        | 3        | 12       | 4        | 6       | 6        | 4        | 5        | 4        | 9        | 0        | 4        | 1        | 2        | 4        | 0       | 4        | 1        |
| 3.1.1.45 | 0        | 0        | 0        | 0        | 0        | 0       | 0        | 0        | 0        | 0        | 0        | 0        | 0        | 0        | 0        | 0        | 0       | 0        | 0        |
| 3.1.2.-  | 1        | 0        | 0        | 0        | 0        | 2       | 2        | 2        | 1        | 1        | 1        | 1        | 2        | 0        | 0        | 0        | 0       | 1        | 0        |
| 3.1.2.23 | 8        | 5        | 9        | 16       | 13       | 4       | 8        | 12       | 11       | 10       | 14       | 7        | 10       | 12       | 4        | 6        | 6       | 8        | 7        |
| 3.1.3.1  | 16       | 19       | 21       | 29       | 27       | 20      | 20       | 18       | 26       | 13       | 34       | 16       | 31       | 21       | 19       | 14       | 14      | 35       | 12       |
| 3.1.3.2  | 5        | 6        | 5        | 6        | 7        | 4       | 2        | 6        | 2        | 6        | 8        | 6        | 8        | 5        | 2        | 4        | 7       | 6        | 0        |
| 3.1.3.41 | 0        | 0        | 0        | 0        | 0        | 0       | 0        | 0        | 1        | 0        | 0        | 0        | 0        | 0        | 0        | 0        | 0       | 0        | 0        |
| 3.2.1.31 | 4        | 1        | 3        | 7        | 4        | 2       | 8        | 3        | 2        | 4        | 5        | 1        | 6        | 3        | 4        | 0        | 0       | 6        | 4        |
| 3.3.2.9  | 0        | 0        | 0        | 0        | 0        | 0       | 0        | 0        | 0        | 0        | 0        | 0        | 0        | 0        | 0        | 0        | 0       | 0        | 0        |
| 3.5.1.-  | 14       | 16       | 18       | 55       | 39       | 22      | 58       | 26       | 44       | 21       | 50       | 11       | 38       | 11       | 11       | 19       | 4       | 50       | 10       |
| 3.5.1.4  | 2        | 0        | 1        | 2        | 4        | 2       | 6        | 2        | 4        | 2        | 2        | 0        | 2        | 1        | 0        | 1        | 0       | 3        | 2        |
| 3.5.1.5  | 1        | 2        | 2        | 8        | 2        | 2       | 3        | 2        | 4        | 0        | 3        | 0        | 6        | 5        | 0        | 2        | 1       | 3        | 2        |
| 3.5.1.54 | 0        | 1        | 2        | 9        | 1        | 0       | 7        | 4        | 5        | 4        | 1        | 0        | 4        | 0        | 0        | 1        | 0       | 4        | 2        |
| 3.5.1.6  | 1        | 1        | 0        | 2        | 0        | 1       | 1        | 3        | 3        | 1        | 3        | 0        | 1        | 0        | 2        | 0        | 0       | 3        | 0        |
| 3.5.2.-  | 0        | 0        | 0        | 0        | 0        | 0       | 0        | 0        | 0        | 0        | 0        | 0        | 1        | 0        | 0        | 0        | 0       | 0        | 0        |
| 3.5.2.2  | 0        | 0        | 1        | 5        | 1        | 0       | 1        | 1        | 1        | 0        | 3        | 0        | 3        | 0        | 0        | 1        | 0       | 2        | 0        |
| 3.5.4.-  | 20       | 19       | 23       | 68       | 44       | 19      | 45       | 26       | 49       | 22       | 49       | 16       | 46       | 27       | 13       | 21       | 9       | 58       | 17       |
| 3.5.4.5  | 12       | 16       | 11       | 39       | 21       | 12      | 30       | 20       | 30       | 10       | 36       | 10       | 27       | 16       | 6        | 12       | 6       | 45       | 11       |
| 3.5.5.1  | 0        | 0        | 1        | 3        | 4        | 1       | 2        | 1        | 1        | 1        | 1        | 1        | 2        | 1        | 0        | 1        | 1       | 1        | 1        |
| 3.5.5.7  | 0        | 0        | 0        | 0        | 0        | 0       | 0        | 0        | 0        | 0        | 0        | 0        | 0        | 0        | 0        | 0        | 0       | 0        | 0        |
| 3.5.99.3 | 0        | 0        | 1        | 0        | 0        | 0       | 1        | 1        | 0        | 0        | 1        | 0        | 0        | 0        | 0        | 0        | 0       | 0        | 0        |
| 3.6.1.7  | 0        | 1        | 3        | 13       | 5        | 2       | 10       | 8        | 10       | 5        | 8        | 3        | 4        | 2        | 1        | 2        | 0       | 8        | 1        |
| 3.7.1.-  | 0        | 2        | 1        | 2        | 1        | 0       | 3        | 2        | 1        | 1        | 1        | 0        | 2        | 0        | 1        | 0        | 2       | 0        | 1        |
| 3.7.1.2  | 7        | 3        | 6        | 5        | 7        | 3       | 6        | 5        | 7        | 4        | 5        | 3        | 7        | 11       | 5        | 4        | 5       | 7        | 3        |
| 3.8.1.2  | 7        | 6        | 3        | 10       | 10       | 7       | 11       | 6        | 10       | 5        | 11       | 5        | 12       | 10       | 5        | 4        | 6       | 6        | 5        |
| 3.8.1.3  | 0        | 0        | 0        | 0        | 0        | 0       | 0        | 0        | 0        | 0        | 0        | 0        | 0        | 0        | 0        | 0        | 0       | 0        | 0        |
| 3.8.1.5  | 0        | 1        | 0        | 1        | 0        | 0       | 1        | 0        | 1        | 0        | 0        | 0        | 0        | 0        | 0        | 0        | 0       | 1        | 1        |
| 4.1.1.-  | 11       | 11       | 10       | 15       | 13       | 7       | 14       | 18       | 19       | 11       | 14       | 9        | 17       | 10       | 7        | 5        | 3       | 21       | 4        |
| 4.1.1.44 | 30       | 21       | 28       | 76       | 53       | 32      | 41       | 54       | 60       | 28       | 61       | 24       | 46       | 33       | 22       | 23       | 15      | 57       | 30       |
| 4.1.1.55 | 0        | 0        | 0        | 0        | 0        | 0       | 0        | 0        | 0        | 0        | 0        | 0        | 0        | 0        | 0        | 0        | 0       | 0        | 0        |
| 4.1.1.7  | 0        | 0        | 0        | 0        | 0        | 0       | 0        | 0        | 0        | 0        | 0        | 0        | 0        | 0        | 0        | 0        | 0       | 0        | 0        |
| 4.1.1.70 | 0        | 0        | 0        | 0        | 0        | 0       | 1        | 2        | 1        | 0        | 0        | 0        | 0        | 0        | 0        | 0        | 0       | 0        | 0        |
| 4.1.1.77 | 0        | 0        | 0        | 1        | 0        | 0       | 0        | 0        | 0        | 0        | 0        | 0        | 0        | 0        | 0        | 0        | 0       | 0        | 0        |
| 4.1.2.-  | 4        | 3        | 6        | 8        | 10       | 1       | 5        | 8        | 9        | 2        | 9        | 4        | 6        | 1        | 3        | 5        | 1       | 14       | 6        |
| 4.1.3.-  | 17       | 14       | 18       | 31       | 28       | 18      | 29       | 25       | 26       | 13       | 27       | 8        | 28       | 14       | 7        | 15       | 6       | 40       | 12       |

| EC/KO    | AM-AD-45 | AM-AD-46 | AM-AD-47 | AM-AD-48 | AM-AD-49 | AM-AD-5 | AM-AD-50 | AM-AD-51 | AM-AD-52 | AM-AD-53 | AM-AD-54 | AM-AD-55 | AM-AD-56 | AM-AD-57 | AM-AD-58 | AM-AD-59 | AM-AD-6 | AM-AD-60 | AM-AD-61 |
|----------|----------|----------|----------|----------|----------|---------|----------|----------|----------|----------|----------|----------|----------|----------|----------|----------|---------|----------|----------|
| 4.1.3.39 | 0        | 0        | 0        | 0        | 0        | 0       | 2        | 0        | 1        | 0        | 0        | 1        | 2        | 1        | 1        | 0        | 0       | 1        | 0        |
| 4.1.99.- | 1        | 0        | 1        | 4        | 3        | 1       | 3        | 1        | 1        | 5        | 3        | 0        | 3        | 0        | 0        | 0        | 0       | 8        | 1        |
| 4.2.1.-  | 52       | 40       | 45       | 111      | 74       | 55      | 86       | 70       | 80       | 41       | 77       | 39       | 97       | 49       | 30       | 42       | 20      | 111      | 35       |
| 4.2.1.17 | 0        | 2        | 5        | 11       | 4        | 4       | 7        | 7        | 8        | 4        | 6        | 1        | 5        | 2        | 2        | 6        | 0       | 10       | 5        |
| 4.2.1.80 | 0        | 0        | 0        | 0        | 0        | 0       | 0        | 0        | 0        | 0        | 0        | 0        | 0        | 0        | 0        | 0        | 0       | 0        | 0        |
| 4.2.1.83 | 0        | 0        | 0        | 2        | 1        | 1       | 0        | 1        | 0        | 1        | 1        | 0        | 1        | 0        | 0        | 0        | 0       | 1        | 0        |
| 4.2.1.84 | 0        | 1        | 0        | 1        | 0        | 2       | 0        | 0        | 0        | 1        | 1        | 0        | 0        | 0        | 0        | 1        | 0       | 0        | 1        |
| 5.1.2.2  | 0        | 0        | 0        | 0        | 0        | 0       | 0        | 0        | 0        | 0        | 0        | 0        | 0        | 0        | 0        | 0        | 0       | 0        | 0        |
| 5.2.1.2  | 0        | 0        | 0        | 0        | 0        | 0       | 0        | 0        | 0        | 0        | 0        | 0        | 0        | 0        | 0        | 0        | 0       | 0        | 0        |
| 5.3.3.4  | 0        | 0        | 0        | 0        | 0        | 0       | 0        | 1        | 0        | 0        | 0        | 0        | 0        | 0        | 0        | 0        | 0       | 0        | 0        |
| 5.3.99.- | 2        | 4        | 1        | 7        | 8        | 1       | 9        | 3        | 4        | 2        | 5        | 1        | 4        | 2        | 0        | 3        | 1       | 5        | 5        |
| 5.4.99.- | 0        | 0        | 1        | 1        | 1        | 1       | 0        | 1        | 1        | 0        | 0        | 0        | 0        | 1        | 0        | 1        | 0       | 0        | 0        |
| 5.5.1.1  | 6        | 2        | 4        | 4        | 4        | 3       | 4        | 3        | 5        | 3        | 8        | 3        | 5        | 5        | 4        | 2        | 3       | 8        | 4        |
| 5.5.1.2  | 0        | 0        | 0        | 0        | 0        | 0       | 0        | 0        | 0        | 0        | 0        | 0        | 0        | 0        | 0        | 0        | 0       | 0        | 0        |
| 6.2.1.-  | 0        | 0        | 0        | 0        | 0        | 0       | 0        | 0        | 0        | 0        | 0        | 0        | 0        | 0        | 0        | 0        | 0       | 0        | 0        |
| 6.3.5.2  | 18       | 19       | 22       | 38       | 46       | 22      | 32       | 18       | 24       | 15       | 36       | 9        | 29       | 12       | 12       | 15       | 10      | 38       | 10       |
| K00002   | 1        | 0        | 0        | 1        | 5        | 2       | 4        | 2        | 3        | 1        | 2        | 0        | 2        | 3        | 1        | 1        | 0       | 2        | 1        |
| K00055   | 0        | 0        | 0        | 0        | 0        | 0       | 1        | 0        | 0        | 0        | 0        | 1        | 0        | 0        | 0        | 0        | 0       | 0        | 0        |
| K00074   | 7        | 5        | 4        | 9        | 6        | 2       | 7        | 3        | 5        | 3        | 6        | 3        | 4        | 3        | 0        | 2        | 0       | 9        | 0        |
| K00088   | 13       | 10       | 13       | 21       | 27       | 10      | 24       | 19       | 23       | 16       | 31       | 8        | 23       | 11       | 13       | 12       | 4       | 32       | 13       |
| K00100   | 49       | 32       | 44       | 92       | 88       | 43      | 91       | 78       | 70       | 35       | 106      | 51       | 76       | 56       | 29       | 49       | 22      | 105      | 22       |
| K00128   | 1        | 0        | 1        | 2        | 4        | 2       | 3        | 2        | 4        | 2        | 3        | 1        | 1        | 0        | 1        | 3        | 0       | 4        | 0        |
| K00129   | 0        | 0        | 0        | 0        | 0        | 0       | 0        | 0        | 0        | 0        | 0        | 0        | 0        | 0        | 0        | 0        | 0       | 0        | 0        |
| K00132   | 0        | 0        | 0        | 1        | 1        | 2       | 0        | 2        | 1        | 0        | 2        | 0        | 3        | 0        | 0        | 2        | 0       | 2        | 0        |
| K00141   | 0        | 0        | 0        | 0        | 0        | 0       | 0        | 0        | 0        | 0        | 0        | 0        | 0        | 0        | 0        | 0        | 0       | 0        | 0        |
| K00146   | 0        | 0        | 0        | 0        | 0        | 0       | 0        | 0        | 0        | 0        | 0        | 0        | 0        | 0        | 0        | 0        | 0       | 0        | 0        |
| K00148   | 0        | 0        | 0        | 0        | 0        | 0       | 0        | 0        | 0        | 0        | 0        | 0        | 0        | 0        | 0        | 0        | 0       | 0        | 0        |
| K00155   | 0        | 0        | 0        | 0        | 0        | 0       | 0        | 0        | 0        | 0        | 3        | 0        | 0        | 0        | 1        | 0        | 0       | 0        | 0        |
| K00169   | 0        | 0        | 0        | 3        | 3        | 0       | 3        | 3        | 2        | 2        | 6        | 0        | 2        | 0        | 0        | 0        | 1       | 9        | 0        |
| K00224   | 0        | 1        | 1        | 0        | 1        | 0       | 1        | 1        | 1        | 0        | 1        | 0        | 1        | 0        | 1        | 0        | 0       | 0        | 0        |
| K00274   | 0        | 0        | 0        | 0        | 0        | 0       | 0        | 0        | 0        | 0        | 0        | 0        | 0        | 0        | 0        | 0        | 0       | 0        | 0        |
| K00446   | 0        | 0        | 0        | 0        | 0        | 0       | 0        | 0        | 0        | 0        | 0        | 0        | 0        | 0        | 0        | 0        | 0       | 0        | 0        |
| K00448   | 0        | 0        | 0        | 0        | 0        | 0       | 0        | 0        | 0        | 0        | 0        | 0        | 0        | 0        | 0        | 0        | 0       | 0        | 0        |
| K00462   | 2        | 1        | 0        | 0        | 1        | 2       | 2        | 2        | 3        | 2        | 2        | 2        | 2        | 2        | 0        | 2        | 0       | 2        | 2        |
| K00480   | 0        | 0        | 0        | 0        | 0        | 0       | 0        | 0        | 0        | 0        | 0        | 0        | 0        | 0        | 0        | 0        | 0       | 0        | 0        |
| K00481   | 0        | 0        | 0        | 0        | 0        | 0       | 0        | 0        | 0        | 0        | 0        | 0        | 0        | 0        | 0        | 0        | 0       | 0        | 0        |
| K00539   | 1        | 0        | 0        | 1        | 0        | 1       | 1        | 1        | 1        | 0        | 1        | 0        | 2        | 1        | 1        | 0        | 0       | 0        | 0        |
| K00599   | 34       | 20       | 23       | 87       | 49       | 37      | 72       | 57       | 66       | 36       | 86       | 16       | 77       | 40       | 15       | 36       | 17      | 84       | 28       |
| K00626   | 2        | 1        | 0        | 8        | 3        | 4       | 4        | 3        | 2        | 1        | 3        | 3        | 9        | 0        | 1        | 0        | 0       | 3        | 1        |
| K00632   | 0        | 0        | 0        | 0        | 0        | 0       | 0        | 0        | 0        | 0        | 0        | 0        | 0        | 0        | 0        | 0        | 0       | 0        | 0        |
| K00680   | 37       | 25       | 33       | 82       | 71       | 37      | 70       | 65       | 61       | 36       | 79       | 28       | 60       | 48       | 22       | 35       | 23      | 74       | 33       |
| K00757   | 6        | 10       | 9        | 20       | 23       | 10      | 18       | 13       | 19       | 15       | 15       | 7        | 16       | 12       | 5        | 9        | 3       | 22       | 5        |
| K00758   | 0        | 2        | 2        | 3        | 6        | 2       | 12       | 3        | 3        | 2        | 8        | 0        | 4        | 2        | 1        | 3        | 0       | 6        | 1        |
| K00760   | 15       | 19       | 19       | 43       | 38       | 20      | 36       | 31       | 42       | 17       | 38       | 10       | 34       | 16       | 10       | 20       | 8       | 51       | 18       |
| K00799   | 0        | 0        | 0        | 1        | 0        | 0       | 0        | 0        | 1        | 0        | 1        | 0        | 1        | 1        | 0        | 0        | 0       | 0        | 0        |
| K00857   | 9        | 9        | 18       | 30       | 20       | 7       | 22       | 17       | 21       | 11       | 32       | 8        | 17       | 12       | 5        | 9        | 5       | 20       | 9        |
| K00876   | 20       | 20       | 26       | 52       | 51       | 22      | 48       | 31       | 45       | 30       | 56       | 21       | 48       | 28       | 15       | 21       | 11      | 57       | 17       |
| K01026   | 1        | 0        | 0        | 2        | 0        | 0       | 2        | 1        | 2        | 0        | 1        | 1        | 0        | 0        | 0        | 0        | 0       | 1        | 0        |
| K01031   | 0        | 0        | 0        | 0        | 0        | 0       | 0        | 1        | 0        | 0        | 0        | 0        | 0        | 0        | 0        | 0        | 0       | 0        | 0        |

| EC/KO  | AM-AD-45 | AM-AD-46 | AM-AD-47 | AM-AD-48 | AM-AD-49 | AM-AD-5 | AM-AD-50 | AM-AD-51 | AM-AD-52 | AM-AD-53 | AM-AD-54 | AM-AD-55 | AM-AD-56 | AM-AD-57 | AM-AD-58 | AM-AD-59 | AM-AD-6 | AM-AD-60 | AM-AD-61 |
|--------|----------|----------|----------|----------|----------|---------|----------|----------|----------|----------|----------|----------|----------|----------|----------|----------|---------|----------|----------|
| K01034 | 0        | 0        | 2        | 3        | 2        | 1       | 5        | 3        | 3        | 1        | 2        | 0        | 3        | 1        | 0        | 2        | 0       | 4        | 1        |
| K01039 | 0        | 0        | 0        | 0        | 0        | 0       | 0        | 1        | 0        | 0        | 1        | 0        | 1        | 0        | 0        | 0        | 0       | 0        | 1        |
| K01041 | 3        | 5        | 4        | 10       | 8        | 2       | 5        | 3        | 4        | 4        | 16       | 3        | 5        | 6        | 5        | 3        | 1       | 11       | 1        |
| K01053 | 0        | 0        | 0        | 1        | 0        | 0       | 0        | 0        | 1        | 0        | 0        | 1        | 0        | 0        | 0        | 0        | 0       | 0        | 0        |
| K01055 | 0        | 0        | 0        | 0        | 0        | 0       | 0        | 0        | 0        | 0        | 0        | 0        | 0        | 0        | 0        | 0        | 0       | 0        | 0        |
| K01061 | 0        | 0        | 0        | 0        | 0        | 0       | 0        | 0        | 0        | 0        | 0        | 0        | 0        | 0        | 0        | 0        | 0       | 0        | 0        |
| K01066 | 5        | 2        | 7        | 11       | 13       | 4       | 10       | 15       | 17       | 5        | 16       | 3        | 10       | 6        | 4        | 6        | 3       | 11       | 3        |
| K01075 | 0        | 0        | 0        | 0        | 1        | 1       | 0        | 1        | 2        | 1        | 2        | 0        | 2        | 1        | 1        | 0        | 0       | 0        | 0        |
| K01077 | 7        | 10       | 10       | 12       | 16       | 6       | 17       | 13       | 15       | 11       | 17       | 8        | 23       | 10       | 12       | 7        | 6       | 19       | 7        |
| K01101 | 1        | 2        | 0        | 5        | 15       | 1       | 8        | 9        | 7        | 1        | 5        | 0        | 4        | 0        | 2        | 2        | 1       | 8        | 2        |
| K01195 | 10       | 4        | 5        | 11       | 12       | 6       | 13       | 4        | 10       | 6        | 21       | 7        | 15       | 8        | 5        | 8        | 3       | 13       | 5        |
| K01426 | 0        | 1        | 0        | 1        | 2        | 0       | 0        | 2        | 1        | 2        | 4        | 0        | 0        | 0        | 1        | 0        | 0       | 3        | 0        |
| K01428 | 0        | 0        | 1        | 3        | 2        | 2       | 2        | 3        | 1        | 2        | 2        | 0        | 1        | 1        | 0        | 2        | 0       | 2        | 0        |
| K01457 | 0        | 0        | 0        | 0        | 0        | 0       | 0        | 0        | 0        | 0        | 1        | 0        | 0        | 0        | 0        | 0        | 0       | 0        | 0        |
| K01464 | 0        | 0        | 1        | 4        | 2        | 0       | 2        | 1        | 1        | 0        | 2        | 1        | 1        | 0        | 0        | 1        | 1       | 2        | 0        |
| K01489 | 14       | 19       | 16       | 41       | 31       | 13      | 35       | 30       | 36       | 15       | 39       | 11       | 32       | 17       | 7        | 13       | 7       | 40       | 15       |
| K01500 | 0        | 0        | 0        | 1        | 0        | 0       | 0        | 0        | 0        | 0        | 0        | 0        | 1        | 0        | 0        | 0        | 0       | 0        | 0        |
| K01501 | 0        | 0        | 1        | 5        | 5        | 1       | 3        | 4        | 2        | 1        | 3        | 0        | 2        | 0        | 0        | 1        | 1       | 3        | 2        |
| K01502 | 0        | 0        | 0        | 0        | 0        | 0       | 0        | 0        | 0        | 0        | 0        | 0        | 0        | 0        | 0        | 0        | 0       | 0        | 0        |
| K01512 | 3        | 2        | 7        | 17       | 7        | 5       | 17       | 13       | 15       | 8        | 11       | 3        | 10       | 2        | 1        | 4        | 0       | 13       | 4        |
| K01560 | 1        | 3        | 5        | 11       | 13       | 3       | 6        | 8        | 7        | 2        | 10       | 0        | 7        | 0        | 0        | 4        | 1       | 7        | 7        |
| K01561 | 0        | 0        | 0        | 0        | 0        | 0       | 0        | 1        | 1        | 0        | 0        | 1        | 0        | 0        | 0        | 0        | 0       | 1        | 0        |
| K01563 | 0        | 0        | 0        | 0        | 0        | 0       | 0        | 0        | 0        | 0        | 1        | 0        | 0        | 0        | 0        | 0        | 0       | 0        | 0        |
| K01564 | 1        | 1        | 2        | 3        | 4        | 1       | 3        | 1        | 0        | 2        | 1        | 1        | 4        | 3        | 1        | 2        | 1       | 4        | 1        |
| K01607 | 16       | 11       | 13       | 41       | 27       | 13      | 22       | 23       | 30       | 12       | 34       | 12       | 22       | 18       | 11       | 14       | 7       | 27       | 14       |
| K01612 | 0        | 0        | 0        | 0        | 0        | 0       | 0        | 0        | 0        | 0        | 0        | 0        | 0        | 0        | 0        | 0        | 0       | 0        | 0        |
| K01615 | 13       | 9        | 8        | 14       | 20       | 11      | 20       | 15       | 20       | 10       | 26       | 4        | 22       | 9        | 12       | 16       | 3       | 28       | 5        |
| K01617 | 0        | 0        | 0        | 0        | 0        | 0       | 0        | 0        | 0        | 0        | 0        | 0        | 0        | 0        | 0        | 0        | 0       | 0        | 0        |
| K01666 | 4        | 1        | 5        | 5        | 4        | 6       | 13       | 9        | 7        | 4        | 9        | 2        | 9        | 2        | 3        | 3        | 2       | 10       | 3        |
| K01692 | 0        | 0        | 0        | 0        | 0        | 0       | 1        | 0        | 1        | 1        | 1        | 0        | 0        | 1        | 0        | 0        | 0       | 0        | 0        |
| K01721 | 0        | 0        | 0        | 0        | 0        | 0       | 0        | 0        | 0        | 0        | 0        | 0        | 0        | 0        | 0        | 0        | 0       | 0        | 0        |
| K01726 | 7        | 7        | 10       | 18       | 15       | 7       | 11       | 13       | 4        | 10       | 22       | 11       | 14       | 10       | 10       | 5        | 5       | 16       | 4        |
| K01781 | 0        | 0        | 0        | 1        | 0        | 0       | 1        | 1        | 0        | 0        | 0        | 0        | 0        | 0        | 0        | 0        | 0       | 1        | 0        |
| K01821 | 1        | 2        | 1        | 4        | 4        | 2       | 2        | 4        | 4        | 6        | 4        | 2        | 1        | 0        | 1        | 1        | 1       | 2        | 2        |
| K01856 | 0        | 0        | 0        | 0        | 0        | 0       | 0        | 0        | 0        | 0        | 0        | 0        | 0        | 0        | 0        | 0        | 0       | 0        | 0        |
| K01857 | 0        | 0        | 0        | 0        | 0        | 0       | 1        | 0        | 1        | 0        | 1        | 0        | 0        | 0        | 0        | 0        | 0       | 1        | 0        |
| K01913 | 0        | 0        | 0        | 1        | 0        | 0       | 0        | 1        | 1        | 0        | 0        | 0        | 1        | 0        | 0        | 0        | 0       | 0        | 0        |
| K01951 | 14       | 14       | 14       | 13       | 34       | 13      | 16       | 8        | 17       | 12       | 25       | 8        | 19       | 9        | 11       | 11       | 6       | 30       | 7        |
| K02554 | 0        | 0        | 0        | 0        | 0        | 0       | 0        | 0        | 0        | 0        | 0        | 0        | 0        | 0        | 0        | 0        | 0       | 0        | 0        |
| K03381 | 0        | 0        | 0        | 0        | 0        | 0       | 0        | 0        | 0        | 0        | 0        | 0        | 0        | 0        | 0        | 0        | 0       | 0        | 0        |
| K03382 | 0        | 0        | 1        | 1        | 3        | 0       | 2        | 1        | 1        | 2        | 1        | 1        | 0        | 0        | 0        | 0        | 0       | 0        | 1        |
| K03464 | 0        | 0        | 0        | 0        | 0        | 0       | 0        | 0        | 0        | 0        | 0        | 0        | 0        | 0        | 0        | 0        | 0       | 0        | 0        |
| K03518 | 2        | 9        | 5        | 24       | 15       | 0       | 15       | 6        | 9        | 12       | 8        | 6        | 10       | 2        | 3        | 1        | 2       | 19       | 5        |
| K03862 | 0        | 0        | 0        | 0        | 0        | 0       | 0        | 0        | 0        | 0        | 0        | 0        | 0        | 0        | 0        | 0        | 0       | 0        | 0        |
| K04099 | 0        | 0        | 0        | 0        | 0        | 0       | 0        | 0        | 0        | 0        | 0        | 0        | 0        | 0        | 0        | 0        | 0       | 0        | 0        |
| K04100 | 0        | 0        | 0        | 0        | 0        | 0       | 0        | 0        | 0        | 0        | 0        | 0        | 0        | 0        | 0        | 0        | 0       | 0        | 0        |
| K04102 | 0        | 0        | 0        | 0        | 1        | 0       | 0        | 0        | 0        | 0        | 0        | 0        | 0        | 0        | 0        | 0        | 0       | 0        | 0        |
| K04116 | 0        | 0        | 0        | 0        | 0        | 0       | 0        | 0        | 0        | 0        | 0        | 0        | 0        | 0        | 0        | 0        | 0       | 0        | 0        |
| K05394 | 1        | 0        | 0        | 0        | 3        | 0       | 2        | 1        | 1        | 1        | 0        | 0        | 2        | 1        | 1        | 1        | 0       | 1        | 1        |

| EC/KO  | AM-AD-45 | AM-AD-46 | AM-AD-47 | AM-AD-48 | AM-AD-49 | AM-AD-5 | AM-AD-50 | AM-AD-51 | AM-AD-52 | AM-AD-53 | AM-AD-54 | AM-AD-55 | AM-AD-56 | AM-AD-57 | AM-AD-58 | AM-AD-59 | AM-AD-6 | AM-AD-60 | AM-AD-61 |
|--------|----------|----------|----------|----------|----------|---------|----------|----------|----------|----------|----------|----------|----------|----------|----------|----------|---------|----------|----------|
| K05549 | 0        | 0        | 0        | 0        | 0        | 0       | 0        | 0        | 0        | 0        | 0        | 0        | 0        | 0        | 0        | 0        | 0       | 0        | 0        |
| K05783 | 0        | 0        | 0        | 0        | 0        | 0       | 0        | 0        | 0        | 0        | 0        | 0        | 0        | 0        | 0        | 0        | 0       | 0        | 0        |
| K05797 | 0        | 0        | 0        | 0        | 0        | 0       | 0        | 0        | 0        | 0        | 0        | 0        | 0        | 0        | 0        | 0        | 0       | 0        | 0        |
| K06281 | 2        | 2        | 3        | 1        | 4        | 1       | 3        | 3        | 3        | 0        | 3        | 0        | 1        | 1        | 2        | 0        | 0       | 3        | 0        |
| K06446 | 3        | 1        | 2        | 4        | 4        | 2       | 5        | 4        | 2        | 2        | 2        | 3        | 4        | 4        | 2        | 1        | 1       | 4        | 5        |
| K06912 | 0        | 0        | 0        | 0        | 0        | 0       | 0        | 0        | 0        | 0        | 0        | 0        | 0        | 0        | 0        | 0        | 0       | 0        | 0        |
| K07535 | 0        | 0        | 0        | 1        | 0        | 0       | 0        | 0        | 0        | 0        | 0        | 0        | 0        | 0        | 0        | 0        | 0       | 1        | 0        |
| K07536 | 3        | 3        | 2        | 7        | 4        | 2       | 2        | 2        | 1        | 3        | 5        | 3        | 2        | 3        | 1        | 1        | 0       | 5        | 3        |
| K08689 | 0        | 0        | 0        | 0        | 0        | 0       | 0        | 0        | 0        | 0        | 0        | 0        | 0        | 0        | 0        | 0        | 0       | 0        | 0        |
| K08710 | 0        | 0        | 0        | 0        | 0        | 0       | 0        | 0        | 0        | 0        | 0        | 0        | 0        | 0        | 0        | 0        | 0       | 0        | 0        |
| K09461 | 0        | 0        | 0        | 0        | 0        | 0       | 0        | 0        | 1        | 0        | 0        | 0        | 0        | 0        | 0        | 0        | 0       | 0        | 0        |
| K10217 | 0        | 0        | 0        | 0        | 0        | 0       | 0        | 0        | 0        | 0        | 0        | 0        | 0        | 0        | 0        | 0        | 0       | 0        | 0        |
| K10218 | 0        | 0        | 1        | 1        | 0        | 0       | 0        | 0        | 0        | 0        | 0        | 0        | 0        | 0        | 1        | 0        | 1       | 2        | 0        |
| K10220 | 0        | 0        | 0        | 0        | 0        | 0       | 0        | 0        | 0        | 0        | 0        | 0        | 0        | 0        | 0        | 0        | 0       | 0        | 0        |
| K11180 | 0        | 0        | 0        | 0        | 0        | 0       | 0        | 0        | 0        | 0        | 0        | 0        | 0        | 0        | 0        | 0        | 0       | 0        | 0        |
| K13953 | 0        | 1        | 0        | 0        | 1        | 0       | 2        | 0        | 0        | 0        | 0        | 0        | 0        | 0        | 0        | 0        | 0       | 0        | 0        |
| K14333 | 0        | 0        | 0        | 0        | 0        | 0       | 0        | 0        | 0        | 0        | 0        | 0        | 0        | 0        | 0        | 0        | 0       | 0        | 0        |
| K14519 | 0        | 0        | 0        | 0        | 0        | 0       | 0        | 0        | 0        | 0        | 0        | 0        | 0        | 0        | 0        | 0        | 0       | 0        | 0        |
| K15054 | 0        | 0        | 0        | 0        | 0        | 0       | 0        | 0        | 0        | 0        | 0        | 0        | 0        | 0        | 0        | 0        | 0       | 0        | 0        |
| K16173 | 0        | 1        | 0        | 2        | 0        | 0       | 3        | 1        | 0        | 0        | 0        | 1        | 0        | 0        | 0        | 0        | 0       | 0        | 0        |
| K16514 | 0        | 0        | 0        | 0        | 0        | 0       | 0        | 0        | 0        | 0        | 0        | 0        | 0        | 0        | 0        | 0        | 0       | 0        | 0        |
| K16874 | 0        | 0        | 0        | 1        | 0        | 0       | 1        | 0        | 0        | 0        | 0        | 0        | 0        | 0        | 0        | 0        | 0       | 0        | 0        |

| EC/KO       | AM-AD-62 | AM-AD-63 | AM-AD-64 | AM-AD-65 | AM-AD-66 | AM-AD-67 | AM-AD-68 | AM-AD-69 | AM-AD-7 | AM-AD-70 | AM-AD-71 | AM-AD-72 | AM-AD-73 | AM-AD-74 | AM-AD-75 | AM-AD-76 | AM-AD-77 | AM-AD-78 |
|-------------|----------|----------|----------|----------|----------|----------|----------|----------|---------|----------|----------|----------|----------|----------|----------|----------|----------|----------|
| 1.1.1.-     | 69       | 82       | 23       | 41       | 21       | 48       | 38       | 41       | 57      | 61       | 27       | 99       | 81       | 44       | 101      | 73       | 74       | 77       |
| 1.1.1.1     | 47       | 52       | 12       | 11       | 21       | 25       | 21       | 30       | 23      | 32       | 12       | 62       | 41       | 18       | 49       | 40       | 33       | 61       |
| 1.1.1.157   | 1        | 1        | 0        | 0        | 3        | 2        | 1        | 0        | 1       | 2        | 2        | 2        | 2        | 2        | 2        | 1        | 2        | 3        |
| 1.1.1.205   | 30       | 32       | 7        | 17       | 11       | 20       | 15       | 16       | 23      | 26       | 13       | 39       | 28       | 13       | 39       | 28       | 28       | 38       |
| 1.1.1.35    | 4        | 6        | 1        | 1        | 0        | 3        | 1        | 1        | 5       | 2        | 2        | 8        | 0        | 0        | 5        | 1        | 4        | 4        |
| 1.1.2.99.6  | 5        | 3        | 0        | 5        | 0        | 3        | 1        | 0        | 0       | 5        | 1        | 2        | 1        | 3        | 1        | 5        | 3        | 2        |
| 1.1.3.11.-  | 0        | 0        | 0        | 0        | 0        | 0        | 0        | 0        | 0       | 0        | 0        | 0        | 0        | 0        | 0        | 0        | 0        | 0        |
| 1.1.3.11.1  | 0        | 0        | 0        | 0        | 0        | 0        | 0        | 0        | 0       | 0        | 0        | 0        | 0        | 0        | 0        | 0        | 0        | 0        |
| 1.1.3.11.2  | 0        | 0        | 0        | 0        | 0        | 0        | 0        | 0        | 0       | 0        | 0        | 0        | 0        | 0        | 0        | 0        | 0        | 0        |
| 1.1.3.11.3  | 0        | 0        | 0        | 0        | 0        | 0        | 0        | 0        | 0       | 0        | 0        | 0        | 0        | 0        | 0        | 0        | 0        | 0        |
| 1.1.3.11.39 | 0        | 0        | 0        | 0        | 0        | 0        | 0        | 0        | 0       | 0        | 0        | 0        | 0        | 0        | 0        | 0        | 0        | 0        |
| 1.1.3.11.5  | 0        | 1        | 0        | 1        | 0        | 0        | 0        | 0        | 0       | 0        | 0        | 0        | 0        | 1        | 0        | 0        | 0        | 0        |
| 1.1.3.11.8  | 0        | 0        | 0        | 0        | 0        | 0        | 0        | 0        | 0       | 0        | 0        | 0        | 0        | 0        | 0        | 0        | 0        | 0        |
| 1.1.4.12.10 | 1        | 0        | 0        | 0        | 0        | 1        | 0        | 0        | 0       | 1        | 0        | 0        | 0        | 0        | 1        | 0        | 0        | 0        |
| 1.1.4.12.13 | 0        | 0        | 0        | 0        | 0        | 0        | 0        | 0        | 0       | 0        | 0        | 0        | 0        | 0        | 0        | 0        | 0        | 0        |
| 1.1.4.12.18 | 0        | 0        | 0        | 0        | 0        | 0        | 0        | 0        | 0       | 0        | 0        | 0        | 0        | 0        | 0        | 0        | 0        | 0        |
| 1.1.4.13.-  | 0        | 0        | 0        | 1        | 0        | 0        | 0        | 1        | 0       | 1        | 0        | 0        | 0        | 0        | 1        | 0        | 1        | 0        |
| 1.1.4.13.1  | 0        | 0        | 0        | 0        | 0        | 0        | 0        | 0        | 0       | 0        | 0        | 0        | 0        | 0        | 0        | 0        | 0        | 0        |
| 1.1.4.13.2  | 0        | 0        | 0        | 0        | 0        | 0        | 0        | 0        | 0       | 0        | 0        | 0        | 0        | 0        | 0        | 0        | 0        | 0        |
| 1.1.4.13.50 | 0        | 0        | 0        | 0        | 0        | 0        | 0        | 0        | 0       | 0        | 0        | 0        | 0        | 0        | 0        | 0        | 0        | 0        |
| 1.1.4.13.7  | 1        | 0        | 0        | 0        | 0        | 0        | 1        | 2        | 2       | 0        | 0        | 0        | 1        | 0        | 0        | 0        | 0        | 0        |
| 1.1.4.13.8  | 0        | 0        | 0        | 0        | 0        | 0        | 0        | 0        | 0       | 0        | 0        | 0        | 0        | 0        | 0        | 0        | 0        | 0        |
| 1.1.4.13.82 | 0        | 0        | 0        | 0        | 0        | 0        | 0        | 0        | 0       | 0        | 0        | 0        | 0        | 0        | 0        | 0        | 0        | 0        |
| 1.1.4.99.-  | 0        | 0        | 0        | 0        | 0        | 0        | 0        | 0        | 0       | 0        | 0        | 0        | 0        | 0        | 0        | 0        | 0        | 0        |
| 1.1.7.99.1  | 0        | 0        | 0        | 0        | 0        | 0        | 0        | 0        | 0       | 0        | 0        | 0        | 0        | 0        | 0        | 0        | 0        | 0        |
| 1.1.8.6.1   | 0        | 2        | 0        | 0        | 0        | 0        | 0        | 0        | 0       | 0        | 0        | 1        | 2        | 0        | 0        | 0        | 0        | 0        |
| 1.2.1.-     | 0        | 0        | 0        | 0        | 0        | 0        | 0        | 0        | 0       | 0        | 0        | 0        | 0        | 0        | 0        | 0        | 0        | 0        |
| 1.2.1.10    | 5        | 4        | 0        | 2        | 2        | 2        | 4        | 3        | 6       | 8        | 0        | 5        | 7        | 0        | 8        | 7        | 12       | 9        |
| 1.2.1.3     | 12       | 13       | 5        | 8        | 4        | 8        | 7        | 4        | 5       | 4        | 6        | 16       | 9        | 4        | 14       | 13       | 12       | 15       |
| 1.2.1.39    | 0        | 0        | 0        | 0        | 0        | 0        | 0        | 0        | 0       | 0        | 0        | 0        | 0        | 0        | 0        | 1        | 0        | 0        |
| 1.2.7.1     | 12       | 28       | 6        | 7        | 5        | 14       | 7        | 11       | 12      | 9        | 5        | 20       | 27       | 9        | 18       | 11       | 16       | 24       |
| 1.2.99.2    | 4        | 3        | 0        | 1        | 2        | 3        | 1        | 1        | 6       | 1        | 2        | 4        | 3        | 1        | 10       | 0        | 3        | 4        |
| 1.3.1.-     | 1        | 1        | 0        | 0        | 0        | 0        | 0        | 0        | 1       | 0        | 1        | 0        | 0        | 0        | 0        | 1        | 0        | 1        |
| 1.3.1.2     | 1        | 3        | 0        | 0        | 1        | 2        | 2        | 0        | 0       | 1        | 1        | 1        | 0        | 1        | 1        | 1        | 1        | 1        |
| 1.3.1.25    | 0        | 0        | 0        | 0        | 0        | 0        | 0        | 0        | 0       | 0        | 0        | 0        | 0        | 0        | 0        | 0        | 0        | 0        |
| 1.3.99.-    | 0        | 0        | 0        | 0        | 0        | 0        | 1        | 0        | 0       | 0        | 0        | 0        | 0        | 0        | 0        | 0        | 0        | 0        |
| 1.6.5.-     | 81       | 85       | 10       | 40       | 21       | 44       | 44       | 54       | 75      | 52       | 30       | 99       | 74       | 42       | 75       | 56       | 72       | 64       |
| 1.7.1.-     | 15       | 10       | 6        | 9        | 4        | 7        | 8        | 9        | 20      | 9        | 3        | 18       | 15       | 10       | 12       | 12       | 10       | 12       |
| 1.8.99.3    | 0        | 1        | 0        | 0        | 0        | 0        | 0        | 0        | 1       | 0        | 0        | 1        | 0        | 1        | 1        | 1        | 1        | 0        |
| 2.1.1.-     | 349      | 498      | 93       | 176      | 113      | 220      | 154      | 240      | 306     | 276      | 115      | 573      | 388      | 151      | 429      | 344      | 375      | 441      |
| 2.3.1.-     | 263      | 309      | 71       | 174      | 73       | 160      | 137      | 153      | 215     | 183      | 71       | 312      | 262      | 138      | 220      | 197      | 254      | 242      |
| 2.3.1.16    | 1        | 0        | 0        | 3        | 1        | 2        | 0        | 2        | 0       | 0        | 0        | 4        | 1        | 0        | 2        | 3        | 3        | 7        |
| 2.3.1.5     | 0        | 0        | 0        | 0        | 0        | 0        | 0        | 0        | 0       | 0        | 0        | 0        | 0        | 0        | 0        | 0        | 0        | 0        |
| 2.3.1.9     | 0        | 4        | 1        | 0        | 0        | 1        | 0        | 0        | 0       | 0        | 0        | 2        | 1        | 1        | 2        | 0        | 0        | 3        |
| 2.4.2.10    | 18       | 25       | 4        | 12       | 7        | 14       | 7        | 10       | 14      | 15       | 6        | 25       | 15       | 9        | 25       | 16       | 15       | 27       |
| 2.4.2.3     | 9        | 14       | 3        | 8        | 3        | 4        | 7        | 3        | 7       | 4        | 6        | 16       | 8        | 4        | 19       | 9        | 8        | 11       |
| 2.4.2.4     | 4        | 11       | 0        | 1        | 2        | 2        | 0        | 3        | 4       | 6        | 1        | 4        | 8        | 2        | 7        | 3        | 2        | 9        |
| 2.4.2.8     | 19       | 24       | 5        | 11       | 7        | 16       | 8        | 11       | 22      | 14       | 6        | 41       | 21       | 9        | 21       | 19       | 21       | 28       |
| 2.5.1.-     | 31       | 38       | 9        | 20       | 3        | 19       | 19       | 25       | 29      | 30       | 11       | 38       | 38       | 20       | 34       | 26       | 29       | 20       |



| EC/KO    | AM-AD-62 | AM-AD-63 | AM-AD-64 | AM-AD-65 | AM-AD-66 | AM-AD-67 | AM-AD-68 | AM-AD-69 | AM-AD-7 | AM-AD-70 | AM-AD-71 | AM-AD-72 | AM-AD-73 | AM-AD-74 | AM-AD-75 | AM-AD-76 | AM-AD-77 | AM-AD-78 |  |
|----------|----------|----------|----------|----------|----------|----------|----------|----------|---------|----------|----------|----------|----------|----------|----------|----------|----------|----------|--|
| 2.5.1.18 | 0        | 2        | 0        | 0        | 1        | 0        | 4        | 0        | 0       | 0        | 0        | 2        | 0        | 0        | 6        | 1        | 0        | 1        |  |
| 2.6.1.-  | 55       | 75       | 14       | 40       | 16       | 39       | 27       | 28       | 42      | 26       | 20       | 68       | 65       | 33       | 65       | 40       | 56       | 41       |  |
| 2.7.1.21 | 13       | 15       | 2        | 8        | 6        | 9        | 8        | 5        | 13      | 13       | 4        | 24       | 8        | 11       | 11       | 9        | 12       | 10       |  |
| 2.7.1.48 | 46       | 63       | 9        | 29       | 17       | 32       | 22       | 27       | 47      | 35       | 23       | 65       | 45       | 25       | 57       | 42       | 43       | 47       |  |
| 2.7.4.-  | 26       | 31       | 8        | 14       | 5        | 13       | 7        | 15       | 21      | 14       | 9        | 45       | 26       | 14       | 24       | 14       | 26       | 22       |  |
| 2.8.3.-  | 2        | 2        | 1        | 3        | 0        | 2        | 1        | 2        | 2       | 0        | 1        | 2        | 1        | 0        | 2        | 1        | 3        | 2        |  |
| 2.8.3.1  | 0        | 0        | 0        | 1        | 0        | 1        | 1        | 0        | 0       | 0        | 0        | 1        | 1        | 0        | 0        | 0        | 0        | 0        |  |
| 2.8.3.12 | 2        | 0        | 0        | 1        | 1        | 2        | 0        | 0        | 0       | 0        | 1        | 1        | 2        | 0        | 1        | 0        | 0        | 1        |  |
| 2.8.3.6  | 0        | 3        | 0        | 2        | 0        | 2        | 0        | 0        | 1       | 2        | 0        | 1        | 0        | 1        | 2        | 0        | 0        | 0        |  |
| 2.8.3.8  | 4        | 5        | 1        | 0        | 0        | 3        | 0        | 1        | 1       | 3        | 0        | 1        | 1        | 1        | 2        | 2        | 5        | 4        |  |
| 3.1.1.-  | 11       | 11       | 7        | 5        | 2        | 4        | 4        | 3        | 6       | 6        | 4        | 10       | 8        | 4        | 9        | 2        | 9        | 9        |  |
| 3.1.1.1  | 6        | 11       | 4        | 5        | 4        | 11       | 6        | 5        | 6       | 7        | 4        | 12       | 13       | 8        | 11       | 6        | 14       | 8        |  |
| 3.1.1.17 | 3        | 3        | 0        | 2        | 0        | 2        | 2        | 0        | 1       | 5        | 2        | 0        | 3        | 2        | 2        | 3        | 2        | 4        |  |
| 3.1.1.2  | 0        | 0        | 0        | 0        | 0        | 0        | 0        | 0        | 0       | 0        | 0        | 0        | 0        | 0        | 1        | 1        | 0        | 0        |  |
| 3.1.1.24 | 4        | 6        | 1        | 2        | 1        | 5        | 0        | 2        | 4       | 1        | 0        | 5        | 4        | 0        | 1        | 3        | 1        | 3        |  |
| 3.1.1.45 | 0        | 0        | 0        | 0        | 0        | 0        | 0        | 0        | 0       | 0        | 0        | 0        | 0        | 0        | 0        | 0        | 0        | 0        |  |
| 3.1.2.-  | 1        | 0        | 1        | 2        | 0        | 0        | 0        | 0        | 0       | 1        | 0        | 0        | 0        | 1        | 1        | 0        | 1        | 0        |  |
| 3.1.2.23 | 13       | 13       | 3        | 12       | 3        | 8        | 7        | 6        | 7       | 6        | 2        | 8        | 14       | 12       | 9        | 5        | 13       | 8        |  |
| 3.1.3.1  | 27       | 34       | 9        | 19       | 11       | 24       | 15       | 27       | 25      | 20       | 10       | 21       | 38       | 25       | 26       | 24       | 29       | 28       |  |
| 3.1.3.2  | 4        | 6        | 3        | 3        | 2        | 4        | 5        | 7        | 8       | 5        | 2        | 5        | 9        | 7        | 4        | 5        | 5        | 8        |  |
| 3.1.3.41 | 0        | 0        | 0        | 0        | 0        | 0        | 0        | 0        | 0       | 0        | 0        | 0        | 0        | 0        | 0        | 0        | 0        | 0        |  |
| 3.2.1.31 | 4        | 3        | 4        | 4        | 5        | 1        | 2        | 2        | 5       | 4        | 3        | 6        | 4        | 1        | 7        | 3        | 6        | 6        |  |
| 3.3.2.9  | 0        | 0        | 0        | 0        | 0        | 0        | 0        | 0        | 0       | 0        | 0        | 0        | 0        | 0        | 0        | 0        | 0        | 0        |  |
| 3.5.1.-  | 34       | 41       | 9        | 15       | 9        | 22       | 14       | 20       | 33      | 20       | 12       | 44       | 40       | 15       | 36       | 22       | 34       | 43       |  |
| 3.5.1.4  | 3        | 3        | 2        | 2        | 2        | 3        | 2        | 2        | 1       | 1        | 1        | 5        | 5        | 0        | 6        | 2        | 5        | 2        |  |
| 3.5.1.5  | 3        | 3        | 0        | 2        | 0        | 2        | 2        | 3        | 0       | 2        | 3        | 2        | 3        | 1        | 2        | 3        | 2        | 1        |  |
| 3.5.1.54 | 4        | 5        | 1        | 0        | 1        | 1        | 2        | 1        | 2       | 1        | 0        | 5        | 1        | 0        | 7        | 5        | 3        | 1        |  |
| 3.5.1.6  | 1        | 4        | 2        | 1        | 1        | 1        | 1        | 0        | 0       | 3        | 0        | 4        | 2        | 1        | 1        | 1        | 0        | 1        |  |
| 3.5.2.-  | 0        | 0        | 0        | 0        | 0        | 0        | 0        | 0        | 0       | 0        | 0        | 0        | 0        | 0        | 0        | 0        | 0        | 0        |  |
| 3.5.2.2  | 1        | 2        | 0        | 1        | 0        | 2        | 1        | 1        | 1       | 0        | 0        | 2        | 2        | 0        | 4        | 0        | 0        | 2        |  |
| 3.5.4.-  | 39       | 57       | 5        | 32       | 11       | 26       | 18       | 24       | 41      | 32       | 9        | 57       | 39       | 22       | 49       | 27       | 36       | 32       |  |
| 3.5.4.5  | 17       | 33       | 3        | 14       | 8        | 12       | 12       | 11       | 25      | 10       | 13       | 29       | 28       | 10       | 18       | 30       | 21       | 18       |  |
| 3.5.5.1  | 1        | 2        | 0        | 0        | 0        | 0        | 1        | 0        | 0       | 4        | 1        | 3        | 0        | 1        | 1        | 1        | 0        | 1        |  |
| 3.5.5.7  | 0        | 0        | 0        | 0        | 0        | 0        | 0        | 0        | 0       | 0        | 0        | 0        | 0        | 0        | 0        | 0        | 0        | 0        |  |
| 3.5.99.3 | 0        | 0        | 1        | 0        | 0        | 0        | 0        | 0        | 0       | 0        | 0        | 0        | 0        | 0        | 0        | 0        | 0        | 0        |  |
| 3.6.1.7  | 2        | 7        | 2        | 2        | 2        | 2        | 0        | 1        | 3       | 2        | 4        | 8        | 5        | 1        | 16       | 8        | 2        | 7        |  |
| 3.7.1.-  | 1        | 3        | 0        | 0        | 0        | 2        | 0        | 0        | 0       | 2        | 0        | 2        | 1        | 0        | 4        | 2        | 1        | 3        |  |
| 3.7.1.2  | 9        | 9        | 3        | 6        | 3        | 3        | 4        | 8        | 6       | 1        | 2        | 6        | 10       | 6        | 7        | 5        | 6        | 3        |  |
| 3.8.1.2  | 7        | 12       | 3        | 9        | 3        | 7        | 7        | 5        | 6       | 8        | 4        | 14       | 11       | 7        | 11       | 2        | 8        | 8        |  |
| 3.8.1.3  | 0        | 0        | 0        | 0        | 0        | 0        | 0        | 0        | 0       | 0        | 0        | 1        | 0        | 0        | 0        | 0        | 0        | 0        |  |
| 3.8.1.5  | 0        | 0        | 1        | 0        | 0        | 0        | 0        | 0        | 0       | 0        | 0        | 1        | 0        | 0        | 1        | 1        | 0        | 1        |  |
| 4.1.1.-  | 14       | 18       | 6        | 15       | 5        | 9        | 7        | 13       | 9       | 17       | 6        | 23       | 18       | 8        | 24       | 11       | 24       | 6        |  |
| 4.1.1.44 | 50       | 66       | 8        | 31       | 29       | 39       | 42       | 25       | 40      | 32       | 21       | 45       | 45       | 22       | 37       | 29       | 44       | 45       |  |
| 4.1.1.55 | 0        | 0        | 0        | 0        | 0        | 0        | 0        | 0        | 0       | 0        | 0        | 0        | 0        | 0        | 0        | 0        | 0        | 0        |  |
| 4.1.1.7  | 0        | 0        | 0        | 0        | 0        | 0        | 0        | 0        | 0       | 0        | 0        | 0        | 0        | 0        | 0        | 0        | 0        | 0        |  |
| 4.1.1.70 | 0        | 0        | 0        | 0        | 0        | 0        | 0        | 0        | 0       | 0        | 0        | 0        | 1        | 0        | 0        | 1        | 1        | 1        |  |
| 4.1.1.77 | 0        | 0        | 0        | 0        | 0        | 0        | 0        | 0        | 0       | 0        | 0        | 0        | 0        | 0        | 0        | 0        | 0        | 0        |  |
| 4.1.2.-  | 6        | 8        | 1        | 3        | 0        | 3        | 3        | 3        | 4       | 2        | 4        | 12       | 10       | 3        | 9        | 8        | 4        | 6        |  |
| 4.1.3.-  | 28       | 26       | 5        | 14       | 11       | 10       | 12       | 17       | 14      | 20       | 12       | 34       | 26       | 14       | 20       | 28       | 17       | 34       |  |

| EC/KO    | AM-AD-62 | AM-AD-63 | AM-AD-64 | AM-AD-65 | AM-AD-66 | AM-AD-67 | AM-AD-68 | AM-AD-69 | AM-AD-7 | AM-AD-70 | AM-AD-71 | AM-AD-72 | AM-AD-73 | AM-AD-74 | AM-AD-75 | AM-AD-76 | AM-AD-77 | AM-AD-78 |
|----------|----------|----------|----------|----------|----------|----------|----------|----------|---------|----------|----------|----------|----------|----------|----------|----------|----------|----------|
| 4.1.3.39 | 2        | 0        | 0        | 1        | 0        | 0        | 0        | 2        | 1       | 0        | 1        | 0        | 2        | 0        | 0        | 1        | 2        | 1        |
| 4.1.99.- | 1        | 1        | 1        | 0        | 1        | 0        | 0        | 3        | 2       | 3        | 2        | 3        | 1        | 0        | 2        | 1        | 0        | 5        |
| 4.2.1.-  | 87       | 97       | 20       | 49       | 28       | 51       | 43       | 58       | 49      | 65       | 31       | 102      | 77       | 60       | 100      | 67       | 79       | 79       |
| 4.2.1.17 | 7        | 13       | 1        | 2        | 0        | 6        | 3        | 4        | 4       | 3        | 4        | 10       | 4        | 2        | 9        | 6        | 7        | 9        |
| 4.2.1.80 | 0        | 0        | 0        | 0        | 0        | 0        | 0        | 0        | 0       | 0        | 0        | 0        | 0        | 1        | 0        | 0        | 0        | 0        |
| 4.2.1.83 | 1        | 0        | 0        | 0        | 0        | 0        | 0        | 1        | 1       | 0        | 0        | 0        | 1        | 0        | 0        | 0        | 0        | 2        |
| 4.2.1.84 | 1        | 0        | 0        | 0        | 0        | 0        | 0        | 0        | 1       | 1        | 0        | 1        | 0        | 0        | 0        | 0        | 0        | 1        |
| 5.1.2.2  | 0        | 0        | 0        | 0        | 0        | 0        | 0        | 0        | 0       | 0        | 0        | 0        | 0        | 0        | 0        | 0        | 0        | 0        |
| 5.2.1.2  | 0        | 0        | 0        | 0        | 0        | 0        | 0        | 0        | 0       | 0        | 0        | 0        | 0        | 0        | 0        | 0        | 0        | 0        |
| 5.3.3.4  | 1        | 0        | 0        | 0        | 0        | 0        | 0        | 0        | 0       | 0        | 0        | 0        | 0        | 0        | 2        | 0        | 0        | 1        |
| 5.3.99.- | 5        | 9        | 0        | 2        | 0        | 5        | 1        | 4        | 4       | 5        | 3        | 12       | 4        | 3        | 6        | 5        | 4        | 3        |
| 5.4.99.- | 1        | 1        | 0        | 0        | 0        | 1        | 1        | 1        | 0       | 0        | 0        | 2        | 2        | 1        | 0        | 0        | 0        | 0        |
| 5.5.1.1  | 4        | 4        | 3        | 2        | 0        | 3        | 4        | 0        | 6       | 5        | 1        | 8        | 4        | 5        | 7        | 4        | 4        | 3        |
| 5.5.1.2  | 0        | 0        | 0        | 0        | 0        | 0        | 0        | 0        | 0       | 0        | 0        | 0        | 0        | 0        | 0        | 0        | 0        | 0        |
| 6.2.1.-  | 0        | 0        | 0        | 0        | 0        | 0        | 0        | 0        | 0       | 0        | 0        | 0        | 0        | 0        | 0        | 0        | 0        | 0        |
| 6.3.5.2  | 28       | 35       | 8        | 11       | 8        | 15       | 8        | 16       | 18      | 36       | 12       | 33       | 32       | 10       | 26       | 31       | 33       | 30       |
| K00002   | 2        | 6        | 1        | 0        | 1        | 1        | 0        | 1        | 1       | 0        | 2        | 4        | 5        | 1        | 4        | 3        | 2        | 2        |
| K00055   | 0        | 0        | 1        | 0        | 0        | 0        | 0        | 0        | 0       | 0        | 0        | 0        | 0        | 0        | 0        | 0        | 0        | 0        |
| K00074   | 8        | 8        | 1        | 1        | 2        | 2        | 3        | 2        | 6       | 5        | 3        | 11       | 4        | 2        | 8        | 4        | 11       | 7        |
| K00088   | 20       | 31       | 5        | 11       | 4        | 13       | 12       | 21       | 13      | 20       | 5        | 29       | 16       | 11       | 25       | 24       | 21       | 28       |
| K00100   | 77       | 100      | 25       | 41       | 21       | 54       | 39       | 41       | 48      | 55       | 24       | 95       | 80       | 37       | 89       | 72       | 93       | 79       |
| K00128   | 3        | 3        | 0        | 3        | 1        | 0        | 1        | 1        | 2       | 1        | 1        | 6        | 3        | 1        | 0        | 4        | 5        | 1        |
| K00129   | 0        | 0        | 0        | 0        | 0        | 0        | 0        | 0        | 0       | 0        | 0        | 0        | 0        | 0        | 0        | 0        | 0        | 0        |
| K00132   | 2        | 0        | 0        | 1        | 0        | 0        | 0        | 1        | 0       | 0        | 0        | 1        | 0        | 0        | 0        | 0        | 0        | 0        |
| K00141   | 0        | 0        | 0        | 0        | 0        | 0        | 0        | 0        | 0       | 0        | 0        | 0        | 0        | 0        | 0        | 0        | 0        | 0        |
| K00146   | 0        | 0        | 0        | 0        | 0        | 0        | 0        | 0        | 0       | 0        | 0        | 0        | 0        | 0        | 0        | 0        | 0        | 0        |
| K00148   | 0        | 0        | 0        | 0        | 0        | 0        | 0        | 0        | 0       | 0        | 0        | 0        | 0        | 0        | 0        | 0        | 0        | 0        |
| K00155   | 1        | 1        | 1        | 0        | 0        | 1        | 1        | 1        | 0       | 0        | 0        | 0        | 0        | 1        | 1        | 0        | 1        | 2        |
| K00169   | 1        | 7        | 2        | 0        | 1        | 1        | 1        | 3        | 2       | 4        | 0        | 2        | 3        | 0        | 3        | 1        | 2        | 7        |
| K00224   | 1        | 2        | 1        | 0        | 0        | 2        | 2        | 1        | 0       | 0        | 0        | 2        | 0        | 0        | 0        | 2        | 1        | 2        |
| K00274   | 0        | 0        | 0        | 0        | 0        | 0        | 0        | 0        | 0       | 0        | 0        | 0        | 0        | 0        | 0        | 0        | 0        | 0        |
| K00446   | 0        | 0        | 0        | 0        | 0        | 0        | 0        | 0        | 0       | 0        | 0        | 0        | 0        | 0        | 0        | 0        | 0        | 0        |
| K00448   | 0        | 0        | 0        | 0        | 0        | 0        | 0        | 0        | 0       | 0        | 0        | 0        | 0        | 0        | 0        | 0        | 0        | 0        |
| K00462   | 1        | 1        | 2        | 1        | 0        | 0        | 0        | 0        | 2       | 1        | 1        | 2        | 3        | 1        | 2        | 3        | 3        | 1        |
| K00480   | 0        | 0        | 0        | 0        | 0        | 0        | 0        | 0        | 0       | 0        | 0        | 0        | 0        | 0        | 0        | 0        | 0        | 0        |
| K00481   | 0        | 0        | 0        | 0        | 0        | 0        | 0        | 0        | 0       | 0        | 0        | 0        | 0        | 0        | 0        | 0        | 0        | 0        |
| K00539   | 0        | 6        | 1        | 0        | 0        | 1        | 1        | 0        | 0       | 0        | 0        | 3        | 0        | 0        | 2        | 1        | 0        | 1        |
| K00599   | 57       | 61       | 16       | 30       | 18       | 36       | 20       | 34       | 56      | 32       | 14       | 81       | 52       | 24       | 79       | 38       | 59       | 76       |
| K00626   | 3        | 3        | 1        | 3        | 1        | 5        | 0        | 2        | 0       | 3        | 1        | 6        | 2        | 2        | 4        | 5        | 4        | 9        |
| K00632   | 0        | 0        | 0        | 0        | 0        | 0        | 0        | 0        | 0       | 0        | 0        | 0        | 0        | 0        | 0        | 0        | 0        | 0        |
| K00680   | 67       | 77       | 11       | 33       | 17       | 59       | 41       | 31       | 41      | 53       | 12       | 83       | 70       | 40       | 56       | 43       | 60       | 47       |
| K00757   | 17       | 22       | 8        | 13       | 4        | 10       | 6        | 11       | 12      | 13       | 9        | 24       | 23       | 10       | 27       | 14       | 19       | 22       |
| K00758   | 6        | 13       | 1        | 2        | 1        | 1        | 0        | 4        | 5       | 1        | 0        | 7        | 2        | 3        | 4        | 6        | 3        | 2        |
| K00760   | 33       | 40       | 8        | 17       | 14       | 27       | 16       | 17       | 33      | 23       | 12       | 52       | 27       | 17       | 28       | 26       | 33       | 36       |
| K00799   | 0        | 2        | 0        | 0        | 0        | 0        | 0        | 0        | 0       | 0        | 0        | 1        | 0        | 1        | 3        | 0        | 0        | 1        |
| K00857   | 20       | 21       | 4        | 13       | 7        | 12       | 13       | 11       | 18      | 19       | 5        | 30       | 17       | 14       | 17       | 17       | 20       | 16       |
| K00876   | 38       | 44       | 9        | 27       | 15       | 24       | 20       | 33       | 46      | 33       | 18       | 64       | 47       | 23       | 47       | 36       | 43       | 48       |
| K01026   | 1        | 2        | 0        | 0        | 0        | 1        | 0        | 0        | 0       | 3        | 0        | 1        | 1        | 0        | 2        | 0        | 1        | 1        |
| K01031   | 0        | 0        | 0        | 0        | 0        | 0        | 0        | 0        | 0       | 0        | 0        | 0        | 0        | 0        | 0        | 0        | 0        | 0        |

| EC/KO  | AM-AD-62 | AM-AD-63 | AM-AD-64 | AM-AD-65 | AM-AD-66 | AM-AD-67 | AM-AD-68 | AM-AD-69 | AM-AD-7 | AM-AD-70 | AM-AD-71 | AM-AD-72 | AM-AD-73 | AM-AD-74 | AM-AD-75 | AM-AD-76 | AM-AD-77 | AM-AD-78 |
|--------|----------|----------|----------|----------|----------|----------|----------|----------|---------|----------|----------|----------|----------|----------|----------|----------|----------|----------|
| K01034 | 2        | 5        | 0        | 2        | 1        | 1        | 1        | 1        | 2       | 1        | 1        | 4        | 4        | 0        | 3        | 1        | 1        | 3        |
| K01039 | 0        | 0        | 0        | 0        | 1        | 2        | 1        | 1        | 0       | 0        | 1        | 0        | 1        | 1        | 1        | 0        | 1        | 0        |
| K01041 | 6        | 5        | 1        | 3        | 2        | 4        | 2        | 8        | 5       | 3        | 2        | 10       | 11       | 1        | 7        | 8        | 10       | 9        |
| K01053 | 0        | 0        | 0        | 0        | 0        | 0        | 0        | 0        | 0       | 0        | 0        | 0        | 1        | 0        | 0        | 0        | 0        | 0        |
| K01055 | 0        | 0        | 0        | 0        | 0        | 0        | 0        | 0        | 0       | 0        | 0        | 0        | 0        | 0        | 0        | 0        | 0        | 0        |
| K01061 | 0        | 0        | 0        | 0        | 0        | 0        | 0        | 0        | 0       | 0        | 0        | 0        | 0        | 0        | 0        | 1        | 0        | 0        |
| K01066 | 10       | 16       | 1        | 3        | 2        | 7        | 3        | 3        | 7       | 7        | 4        | 12       | 16       | 9        | 11       | 10       | 9        | 10       |
| K01075 | 2        | 7        | 1        | 0        | 0        | 3        | 1        | 1        | 1       | 0        | 0        | 3        | 0        | 1        | 3        | 1        | 0        | 2        |
| K01077 | 17       | 16       | 4        | 8        | 5        | 14       | 7        | 13       | 15      | 11       | 5        | 10       | 22       | 13       | 13       | 16       | 18       | 14       |
| K01101 | 3        | 6        | 1        | 3        | 1        | 2        | 3        | 3        | 2       | 2        | 0        | 13       | 5        | 2        | 8        | 7        | 9        | 3        |
| K01195 | 17       | 12       | 3        | 10       | 5        | 5        | 8        | 6        | 6       | 9        | 5        | 13       | 10       | 7        | 14       | 13       | 18       | 10       |
| K01426 | 1        | 1        | 1        | 2        | 0        | 2        | 1        | 1        | 1       | 0        | 0        | 2        | 1        | 0        | 3        | 0        | 2        | 2        |
| K01428 | 2        | 2        | 0        | 0        | 1        | 2        | 0        | 1        | 0       | 3        | 0        | 0        | 1        | 1        | 2        | 0        | 2        | 3        |
| K01457 | 0        | 0        | 0        | 0        | 0        | 0        | 0        | 0        | 0       | 0        | 0        | 2        | 2        | 0        | 0        | 0        | 0        | 0        |
| K01464 | 0        | 3        | 0        | 1        | 0        | 2        | 1        | 1        | 1       | 1        | 0        | 4        | 5        | 0        | 7        | 2        | 0        | 2        |
| K01489 | 25       | 43       | 3        | 17       | 9        | 15       | 14       | 16       | 30      | 18       | 14       | 40       | 34       | 14       | 25       | 32       | 29       | 24       |
| K01500 | 1        | 0        | 0        | 0        | 0        | 0        | 0        | 0        | 0       | 0        | 0        | 0        | 0        | 0        | 0        | 0        | 0        | 0        |
| K01501 | 0        | 2        | 0        | 0        | 0        | 1        | 0        | 1        | 0       | 4        | 0        | 4        | 1        | 2        | 2        | 2        | 0        | 2        |
| K01502 | 0        | 0        | 0        | 0        | 0        | 0        | 0        | 0        | 0       | 0        | 0        | 0        | 0        | 0        | 0        | 0        | 0        | 0        |
| K01512 | 6        | 10       | 3        | 4        | 4        | 3        | 2        | 2        | 7       | 6        | 6        | 14       | 5        | 5        | 21       | 10       | 4        | 12       |
| K01560 | 7        | 7        | 0        | 2        | 2        | 4        | 3        | 3        | 7       | 6        | 1        | 13       | 7        | 1        | 10       | 6        | 5        | 12       |
| K01561 | 0        | 2        | 0        | 1        | 0        | 0        | 0        | 0        | 0       | 0        | 0        | 0        | 0        | 0        | 1        | 0        | 1        | 0        |
| K01563 | 0        | 0        | 0        | 0        | 0        | 0        | 0        | 0        | 0       | 0        | 0        | 0        | 0        | 0        | 0        | 0        | 0        | 0        |
| K01564 | 3        | 5        | 0        | 3        | 1        | 3        | 1        | 2        | 2       | 5        | 0        | 1        | 1        | 1        | 3        | 1        | 4        | 4        |
| K01607 | 23       | 36       | 5        | 18       | 11       | 16       | 19       | 11       | 23      | 16       | 10       | 18       | 25       | 10       | 19       | 16       | 23       | 23       |
| K01612 | 0        | 0        | 0        | 0        | 0        | 0        | 0        | 0        | 0       | 1        | 0        | 0        | 0        | 0        | 0        | 0        | 0        | 0        |
| K01615 | 15       | 15       | 5        | 6        | 6        | 9        | 9        | 12       | 15      | 21       | 7        | 25       | 27       | 12       | 15       | 20       | 21       | 26       |
| K01617 | 0        | 0        | 0        | 0        | 0        | 0        | 0        | 0        | 0       | 0        | 0        | 0        | 0        | 0        | 0        | 0        | 0        | 0        |
| K01666 | 10       | 5        | 1        | 3        | 2        | 2        | 1        | 6        | 7       | 1        | 4        | 8        | 5        | 0        | 6        | 6        | 10       | 12       |
| K01692 | 0        | 3        | 0        | 0        | 0        | 0        | 0        | 0        | 0       | 0        | 0        | 1        | 0        | 1        | 1        | 0        | 0        | 1        |
| K01721 | 0        | 0        | 0        | 0        | 0        | 0        | 0        | 0        | 0       | 0        | 0        | 0        | 0        | 0        | 0        | 0        | 0        | 0        |
| K01726 | 17       | 13       | 5        | 9        | 4        | 9        | 10       | 9        | 17      | 12       | 3        | 17       | 15       | 8        | 7        | 8        | 13       | 8        |
| K01781 | 1        | 2        | 2        | 1        | 0        | 0        | 2        | 0        | 0       | 1        | 0        | 1        | 0        | 0        | 3        | 0        | 1        | 0        |
| K01821 | 2        | 4        | 1        | 1        | 1        | 0        | 0        | 1        | 2       | 2        | 0        | 3        | 2        | 1        | 3        | 0        | 4        | 2        |
| K01856 | 0        | 0        | 0        | 0        | 0        | 0        | 0        | 0        | 0       | 0        | 0        | 0        | 0        | 0        | 0        | 0        | 0        | 0        |
| K01857 | 0        | 1        | 0        | 0        | 0        | 0        | 2        | 0        | 0       | 0        | 0        | 0        | 0        | 0        | 0        | 1        | 0        | 1        |
| K01913 | 0        | 0        | 0        | 0        | 0        | 0        | 0        | 0        | 0       | 0        | 0        | 0        | 0        | 0        | 0        | 0        | 1        | 0        |
| K01951 | 18       | 21       | 5        | 10       | 4        | 12       | 6        | 10       | 11      | 29       | 5        | 21       | 21       | 9        | 22       | 21       | 17       | 20       |
| K02554 | 0        | 0        | 0        | 0        | 0        | 0        | 0        | 0        | 0       | 0        | 0        | 0        | 0        | 0        | 0        | 0        | 0        | 0        |
| K03381 | 0        | 0        | 0        | 0        | 0        | 0        | 0        | 0        | 0       | 0        | 0        | 0        | 0        | 0        | 0        | 0        | 0        | 0        |
| K03382 | 0        | 1        | 1        | 0        | 0        | 1        | 0        | 0        | 0       | 0        | 0        | 2        | 2        | 0        | 0        | 1        | 0        | 1        |
| K03464 | 0        | 0        | 0        | 0        | 0        | 0        | 0        | 0        | 0       | 0        | 0        | 0        | 0        | 0        | 0        | 0        | 0        | 0        |
| K03518 | 11       | 13       | 4        | 3        | 6        | 5        | 2        | 4        | 9       | 10       | 4        | 13       | 10       | 1        | 25       | 12       | 11       | 9        |
| K03862 | 0        | 0        | 0        | 0        | 0        | 0        | 0        | 0        | 0       | 0        | 0        | 0        | 0        | 0        | 0        | 0        | 0        | 0        |
| K04099 | 0        | 0        | 0        | 0        | 0        | 0        | 0        | 0        | 0       | 0        | 0        | 0        | 0        | 0        | 0        | 0        | 0        | 0        |
| K04100 | 0        | 0        | 0        | 0        | 0        | 0        | 0        | 0        | 0       | 0        | 0        | 0        | 0        | 1        | 0        | 0        | 0        | 0        |
| K04102 | 0        | 0        | 0        | 0        | 0        | 0        | 0        | 0        | 0       | 0        | 0        | 0        | 0        | 0        | 0        | 0        | 0        | 0        |
| K04116 | 0        | 0        | 0        | 0        | 0        | 0        | 0        | 0        | 0       | 0        | 0        | 0        | 0        | 0        | 0        | 0        | 0        | 0        |
| K05394 | 1        | 1        | 0        | 0        | 0        | 3        | 2        | 0        | 0       | 1        | 1        | 2        | 2        | 0        | 1        | 3        | 2        | 1        |

| EC/KO  | AM-AD-62 | AM-AD-63 | AM-AD-64 | AM-AD-65 | AM-AD-66 | AM-AD-67 | AM-AD-68 | AM-AD-69 | AM-AD-7 | AM-AD-70 | AM-AD-71 | AM-AD-72 | AM-AD-73 | AM-AD-74 | AM-AD-75 | AM-AD-76 | AM-AD-77 | AM-AD-78 |  |
|--------|----------|----------|----------|----------|----------|----------|----------|----------|---------|----------|----------|----------|----------|----------|----------|----------|----------|----------|--|
| K05549 | 0        | 0        | 0        | 0        | 0        | 0        | 0        | 0        | 0       | 0        | 0        | 0        | 0        | 0        | 0        | 0        | 0        | 0        |  |
| K05783 | 0        | 0        | 0        | 0        | 0        | 0        | 0        | 0        | 0       | 0        | 0        | 0        | 0        | 0        | 0        | 0        | 0        | 0        |  |
| K05797 | 0        | 0        | 0        | 0        | 0        | 0        | 0        | 0        | 0       | 0        | 0        | 0        | 0        | 0        | 0        | 0        | 0        | 0        |  |
| K06281 | 4        | 3        | 1        | 4        | 0        | 2        | 2        | 0        | 0       | 4        | 1        | 3        | 1        | 2        | 2        | 5        | 4        | 2        |  |
| K06446 | 3        | 5        | 2        | 2        | 2        | 1        | 2        | 3        | 1       | 6        | 2        | 4        | 3        | 1        | 4        | 2        | 6        | 5        |  |
| K06912 | 0        | 0        | 0        | 0        | 0        | 0        | 0        | 0        | 0       | 0        | 0        | 0        | 0        | 0        | 0        | 0        | 0        | 0        |  |
| K07535 | 0        | 0        | 0        | 0        | 0        | 0        | 0        | 0        | 0       | 0        | 0        | 0        | 1        | 0        | 0        | 0        | 0        | 0        |  |
| K07536 | 7        | 2        | 2        | 4        | 1        | 1        | 3        | 2        | 5       | 4        | 1        | 6        | 1        | 0        | 5        | 1        | 0        | 2        |  |
| K08689 | 0        | 0        | 0        | 0        | 0        | 0        | 0        | 0        | 0       | 0        | 0        | 0        | 0        | 0        | 0        | 0        | 0        | 0        |  |
| K08710 | 1        | 0        | 0        | 0        | 0        | 0        | 0        | 0        | 0       | 0        | 0        | 0        | 0        | 0        | 0        | 0        | 0        | 0        |  |
| K09461 | 0        | 0        | 0        | 0        | 0        | 0        | 0        | 0        | 0       | 0        | 0        | 0        | 0        | 0        | 0        | 0        | 0        | 0        |  |
| K10217 | 0        | 0        | 0        | 0        | 0        | 0        | 0        | 0        | 0       | 0        | 0        | 0        | 0        | 0        | 0        | 0        | 0        | 0        |  |
| K10218 | 0        | 2        | 1        | 1        | 0        | 1        | 1        | 0        | 0       | 1        | 0        | 1        | 0        | 0        | 1        | 0        | 0        | 0        |  |
| K10220 | 0        | 0        | 0        | 0        | 0        | 0        | 0        | 0        | 0       | 0        | 0        | 0        | 0        | 0        | 0        | 0        | 0        | 0        |  |
| K11180 | 0        | 0        | 0        | 0        | 0        | 0        | 0        | 0        | 0       | 0        | 0        | 0        | 0        | 0        | 0        | 0        | 0        | 0        |  |
| K13953 | 0        | 0        | 0        | 0        | 0        | 0        | 0        | 0        | 0       | 0        | 0        | 0        | 0        | 0        | 0        | 0        | 0        | 0        |  |
| K14333 | 0        | 0        | 0        | 0        | 0        | 0        | 0        | 0        | 0       | 0        | 0        | 0        | 0        | 0        | 0        | 0        | 0        | 0        |  |
| K14519 | 0        | 0        | 0        | 0        | 0        | 0        | 0        | 0        | 0       | 0        | 0        | 0        | 0        | 0        | 0        | 0        | 0        | 0        |  |
| K15054 | 0        | 0        | 0        | 0        | 0        | 0        | 0        | 0        | 0       | 0        | 0        | 0        | 0        | 0        | 0        | 0        | 0        | 0        |  |
| K16173 | 1        | 1        | 0        | 0        | 0        | 0        | 0        | 0        | 0       | 0        | 0        | 0        | 0        | 1        | 2        | 0        | 1        | 0        |  |
| K16514 | 0        | 0        | 0        | 0        | 0        | 0        | 0        | 0        | 0       | 0        | 0        | 1        | 0        | 0        | 0        | 0        | 0        | 0        |  |
| K16874 | 0        | 0        | 0        | 0        | 0        | 0        | 0        | 0        | 0       | 0        | 0        | 1        | 1        | 0        | 0        | 0        | 0        | 0        |  |

| EC/KO       | AM-AD-79 | AM-AD-8 | AM-AD-80 | AM-AD-81 | AM-AD-82 | AM-AD-83 | AM-AD-84 | AM-AD-85 | AM-AD-86 | AM-AD-87 | AM-AD-88 | AM-AD-89 | AM-AD-9 | AM-AD-90 | AM-AD-91 | AM-AD-92 | CH-DLF001 | CH-DLF002 |
|-------------|----------|---------|----------|----------|----------|----------|----------|----------|----------|----------|----------|----------|---------|----------|----------|----------|-----------|-----------|
| 1.1.1.-     | 50       | 19      | 102      | 66       | 56       | 55       | 56       | 23       | 39       | 71       | 37       | 59       | 17      | 49       | 22       | 88       | 27        | 26        |
| 1.1.1.1     | 43       | 16      | 50       | 39       | 30       | 25       | 26       | 11       | 21       | 32       | 19       | 40       | 7       | 28       | 10       | 45       | 10        | 15        |
| 1.1.1.157   | 1        | 0       | 1        | 3        | 3        | 3        | 2        | 0        | 1        | 0        | 0        | 2        | 0       | 1        | 0        | 3        | 0         | 0         |
| 1.1.1.205   | 21       | 10      | 41       | 23       | 18       | 20       | 25       | 10       | 12       | 28       | 8        | 25       | 8       | 17       | 12       | 25       | 9         | 10        |
| 1.1.1.35    | 2        | 0       | 7        | 2        | 5        | 1        | 4        | 0        | 3        | 2        | 0        | 5        | 0       | 2        | 0        | 3        | 1         | 0         |
| 1.1.2.99.6  | 2        | 3       | 3        | 2        | 0        | 0        | 3        | 0        | 1        | 4        | 1        | 1        | 1       | 4        | 1        | 3        | 3         | 0         |
| 1.1.3.11.-  | 0        | 0       | 0        | 0        | 0        | 0        | 0        | 0        | 0        | 0        | 0        | 0        | 0       | 0        | 0        | 0        | 0         | 0         |
| 1.1.3.11.1  | 0        | 0       | 0        | 0        | 0        | 0        | 0        | 0        | 0        | 0        | 0        | 0        | 0       | 0        | 0        | 0        | 0         | 0         |
| 1.1.3.11.2  | 0        | 0       | 0        | 0        | 0        | 0        | 0        | 0        | 0        | 0        | 0        | 0        | 0       | 0        | 0        | 0        | 0         | 0         |
| 1.1.3.11.3  | 0        | 0       | 0        | 0        | 0        | 0        | 0        | 0        | 0        | 0        | 0        | 0        | 0       | 0        | 0        | 0        | 0         | 0         |
| 1.1.3.11.39 | 0        | 0       | 0        | 0        | 0        | 0        | 0        | 0        | 0        | 0        | 0        | 0        | 0       | 0        | 0        | 0        | 0         | 0         |
| 1.1.3.11.5  | 0        | 0       | 0        | 0        | 0        | 0        | 2        | 0        | 0        | 0        | 0        | 0        | 0       | 0        | 0        | 0        | 0         | 0         |
| 1.1.3.11.8  | 0        | 0       | 0        | 0        | 0        | 0        | 0        | 0        | 0        | 0        | 0        | 0        | 0       | 0        | 0        | 0        | 0         | 0         |
| 1.1.4.12.10 | 1        | 0       | 0        | 0        | 0        | 0        | 0        | 0        | 0        | 0        | 0        | 0        | 0       | 0        | 0        | 0        | 0         | 0         |
| 1.1.4.12.13 | 0        | 0       | 0        | 0        | 0        | 0        | 0        | 0        | 0        | 0        | 0        | 0        | 0       | 0        | 0        | 0        | 0         | 0         |
| 1.1.4.12.18 | 0        | 0       | 0        | 0        | 0        | 0        | 0        | 0        | 0        | 0        | 0        | 0        | 0       | 0        | 0        | 0        | 0         | 0         |
| 1.1.4.13.-  | 1        | 0       | 0        | 0        | 0        | 0        | 0        | 0        | 0        | 0        | 0        | 0        | 0       | 0        | 0        | 0        | 0         | 0         |
| 1.1.4.13.1  | 0        | 0       | 0        | 0        | 0        | 0        | 0        | 0        | 0        | 0        | 0        | 0        | 0       | 0        | 0        | 0        | 0         | 0         |
| 1.1.4.13.2  | 0        | 0       | 0        | 0        | 0        | 0        | 0        | 0        | 0        | 0        | 0        | 0        | 0       | 0        | 0        | 0        | 0         | 0         |
| 1.1.4.13.50 | 0        | 0       | 0        | 0        | 0        | 0        | 0        | 0        | 0        | 0        | 0        | 0        | 0       | 0        | 0        | 0        | 0         | 0         |
| 1.1.4.13.7  | 0        | 0       | 0        | 0        | 0        | 1        | 0        | 0        | 0        | 0        | 0        | 0        | 0       | 0        | 0        | 0        | 0         | 0         |
| 1.1.4.13.8  | 0        | 0       | 0        | 0        | 0        | 0        | 0        | 0        | 0        | 0        | 0        | 0        | 0       | 0        | 0        | 0        | 0         | 0         |
| 1.1.4.13.82 | 0        | 0       | 0        | 0        | 0        | 0        | 1        | 0        | 0        | 0        | 0        | 0        | 0       | 0        | 0        | 0        | 0         | 0         |
| 1.1.4.99.-  | 0        | 0       | 0        | 0        | 0        | 0        | 0        | 0        | 0        | 0        | 0        | 0        | 0       | 0        | 0        | 0        | 0         | 0         |
| 1.1.7.99.1  | 0        | 0       | 0        | 0        | 0        | 0        | 0        | 0        | 0        | 0        | 0        | 0        | 0       | 0        | 0        | 0        | 0         | 0         |
| 1.1.8.6.1   | 0        | 0       | 0        | 0        | 1        | 0        | 0        | 0        | 0        | 0        | 0        | 0        | 0       | 0        | 0        | 2        | 0         | 0         |
| 1.2.1.-     | 0        | 0       | 0        | 0        | 0        | 0        | 0        | 0        | 0        | 0        | 0        | 0        | 0       | 0        | 0        | 0        | 0         | 0         |
| 1.2.1.10    | 6        | 3       | 13       | 5        | 6        | 1        | 5        | 2        | 7        | 1        | 0        | 5        | 0       | 2        | 1        | 11       | 1         | 3         |
| 1.2.1.13    | 11       | 4       | 20       | 6        | 8        | 5        | 10       | 7        | 3        | 9        | 2        | 6        | 5       | 8        | 4        | 11       | 3         | 2         |
| 1.2.1.139   | 0        | 0       | 0        | 0        | 0        | 0        | 0        | 0        | 0        | 0        | 0        | 0        | 0       | 0        | 0        | 0        | 0         | 0         |
| 1.2.7.1     | 9        | 5       | 28       | 10       | 8        | 5        | 14       | 1        | 5        | 6        | 5        | 17       | 4       | 7        | 4        | 18       | 4         | 3         |
| 1.2.99.2    | 2        | 1       | 6        | 2        | 1        | 0        | 1        | 3        | 2        | 1        | 1        | 3        | 1       | 1        | 0        | 5        | 0         | 2         |
| 1.3.1.-     | 0        | 0       | 0        | 0        | 0        | 1        | 1        | 0        | 0        | 1        | 0        | 0        | 0       | 0        | 1        | 0        | 0         | 0         |
| 1.3.1.2     | 2        | 0       | 3        | 1        | 0        | 1        | 2        | 0        | 1        | 2        | 1        | 0        | 0       | 1        | 1        | 1        | 0         | 0         |
| 1.3.1.25    | 0        | 0       | 0        | 0        | 0        | 0        | 0        | 0        | 0        | 0        | 0        | 0        | 0       | 0        | 0        | 0        | 0         | 0         |
| 1.3.99.-    | 0        | 0       | 1        | 0        | 0        | 0        | 0        | 0        | 0        | 0        | 0        | 0        | 0       | 0        | 0        | 1        | 0         | 0         |
| 1.6.5.-     | 39       | 16      | 84       | 52       | 33       | 51       | 64       | 10       | 41       | 55       | 44       | 42       | 17      | 43       | 24       | 77       | 18        | 19        |
| 1.7.1.-     | 10       | 5       | 18       | 7        | 4        | 6        | 11       | 2        | 5        | 11       | 8        | 6        | 5       | 10       | 4        | 13       | 6         | 7         |
| 1.8.99.3    | 0        | 0       | 0        | 0        | 0        | 0        | 1        | 0        | 0        | 1        | 0        | 0        | 0       | 0        | 0        | 0        | 0         | 0         |
| 2.1.1.-     | 259      | 101     | 502      | 267      | 234      | 225      | 258      | 72       | 150      | 271      | 133      | 304      | 71      | 179      | 84       | 403      | 62        | 102       |
| 2.3.1.-     | 141      | 61      | 311      | 173      | 122      | 164      | 211      | 64       | 81       | 212      | 98       | 186      | 51      | 147      | 62       | 264      | 70        | 88        |
| 2.3.1.16    | 1        | 1       | 1        | 2        | 0        | 2        | 4        | 0        | 0        | 0        | 0        | 2        | 0       | 0        | 0        | 1        | 1         | 0         |
| 2.3.1.5     | 0        | 0       | 0        | 0        | 0        | 0        | 0        | 0        | 0        | 0        | 0        | 0        | 0       | 0        | 0        | 0        | 0         | 0         |
| 2.3.1.9     | 0        | 0       | 2        | 0        | 3        | 0        | 2        | 1        | 3        | 1        | 0        | 1        | 0       | 0        | 0        | 2        | 0         | 2         |
| 2.4.2.10    | 15       | 4       | 20       | 14       | 16       | 13       | 15       | 2        | 7        | 14       | 6        | 15       | 5       | 11       | 5        | 22       | 3         | 5         |
| 2.4.2.3     | 7        | 3       | 19       | 8        | 14       | 3        | 6        | 3        | 3        | 4        | 1        | 8        | 2       | 5        | 2        | 10       | 0         | 2         |
| 2.4.2.4     | 1        | 2       | 8        | 1        | 2        | 2        | 0        | 0        | 3        | 0        | 1        | 10       | 0       | 0        | 0        | 5        | 0         | 1         |
| 2.4.2.8     | 11       | 6       | 28       | 13       | 11       | 11       | 13       | 2        | 9        | 17       | 10       | 13       | 4       | 10       | 4        | 26       | 4         | 3         |
| 2.5.1.-     | 18       | 10      | 40       | 20       | 13       | 25       | 26       | 3        | 10       | 32       | 15       | 25       | 7       | 16       | 10       | 23       | 12        | 9         |

| EC/KO    | AM-AD-79 | AM-AD-8 | AM-AD-80 | AM-AD-81 | AM-AD-82 | AM-AD-83 | AM-AD-84 | AM-AD-85 | AM-AD-86 | AM-AD-87 | AM-AD-88 | AM-AD-89 | AM-AD-9 | AM-AD-90 | AM-AD-91 | AM-AD-92 | CH-DLF001 | CH-DLF002 |
|----------|----------|---------|----------|----------|----------|----------|----------|----------|----------|----------|----------|----------|---------|----------|----------|----------|-----------|-----------|
| 2.5.1.18 | 2        | 0       | 2        | 1        | 1        | 0        | 2        | 0        | 1        | 0        | 0        | 0        | 0       | 0        | 0        | 2        | 0         | 0         |
| 2.6.1.-  | 47       | 14      | 67       | 26       | 23       | 28       | 36       | 10       | 19       | 39       | 20       | 27       | 8       | 23       | 12       | 49       | 17        | 23        |
| 2.7.1.21 | 5        | 1       | 14       | 8        | 3        | 9        | 8        | 2        | 5        | 10       | 5        | 8        | 2       | 6        | 1        | 13       | 2         | 4         |
| 2.7.1.48 | 35       | 13      | 64       | 28       | 17       | 33       | 35       | 10       | 15       | 40       | 15       | 31       | 7       | 28       | 13       | 50       | 9         | 12        |
| 2.7.4.-  | 15       | 8       | 34       | 16       | 15       | 16       | 12       | 6        | 7        | 18       | 6        | 23       | 5       | 11       | 5        | 27       | 5         | 7         |
| 2.8.3.-  | 1        | 2       | 1        | 2        | 2        | 0        | 4        | 0        | 1        | 2        | 0        | 1        | 0       | 0        | 1        | 2        | 2         | 0         |
| 2.8.3.1  | 0        | 0       | 0        | 0        | 1        | 1        | 0        | 0        | 1        | 0        | 0        | 0        | 0       | 0        | 0        | 0        | 0         | 0         |
| 2.8.3.12 | 0        | 0       | 1        | 0        | 1        | 0        | 2        | 0        | 2        | 0        | 0        | 0        | 0       | 0        | 0        | 0        | 0         | 0         |
| 2.8.3.6  | 0        | 0       | 1        | 1        | 1        | 0        | 1        | 0        | 0        | 1        | 0        | 0        | 0       | 0        | 1        | 0        | 1         | 0         |
| 2.8.3.8  | 1        | 0       | 4        | 1        | 3        | 1        | 1        | 1        | 0        | 1        | 0        | 1        | 1       | 2        | 1        | 4        | 0         | 1         |
| 3.1.1.-  | 3        | 8       | 10       | 3        | 6        | 4        | 4        | 2        | 3        | 6        | 4        | 8        | 3       | 3        | 1        | 9        | 3         | 1         |
| 3.1.1.1  | 5        | 2       | 9        | 9        | 5        | 7        | 8        | 0        | 8        | 10       | 6        | 10       | 3       | 6        | 5        | 8        | 4         | 3         |
| 3.1.1.17 | 2        | 0       | 1        | 1        | 1        | 1        | 3        | 0        | 2        | 3        | 2        | 0        | 0       | 2        | 2        | 2        | 1         | 2         |
| 3.1.1.2  | 0        | 1       | 2        | 0        | 0        | 0        | 0        | 0        | 0        | 1        | 0        | 0        | 0       | 0        | 0        | 0        | 1         | 0         |
| 3.1.1.24 | 2        | 0       | 5        | 3        | 2        | 2        | 3        | 0        | 2        | 3        | 1        | 1        | 0       | 0        | 1        | 2        | 0         | 0         |
| 3.1.1.45 | 0        | 0       | 0        | 0        | 0        | 0        | 0        | 0        | 0        | 0        | 0        | 0        | 0       | 0        | 0        | 0        | 0         | 0         |
| 3.1.2.-  | 0        | 0       | 1        | 0        | 2        | 1        | 1        | 0        | 1        | 0        | 0        | 0        | 0       | 0        | 0        | 1        | 0         | 0         |
| 3.1.2.23 | 6        | 2       | 12       | 6        | 3        | 8        | 11       | 2        | 3        | 13       | 4        | 5        | 3       | 9        | 5        | 8        | 2         | 3         |
| 3.1.3.1  | 17       | 6       | 22       | 23       | 6        | 16       | 29       | 6        | 11       | 28       | 17       | 16       | 6       | 20       | 17       | 19       | 15        | 11        |
| 3.1.3.2  | 2        | 1       | 7        | 4        | 3        | 8        | 6        | 4        | 2        | 9        | 3        | 5        | 4       | 3        | 5        | 4        | 3         | 3         |
| 3.1.3.41 | 0        | 0       | 0        | 0        | 0        | 0        | 0        | 0        | 0        | 0        | 0        | 0        | 0       | 0        | 0        | 0        | 0         | 0         |
| 3.2.1.31 | 4        | 1       | 6        | 0        | 6        | 1        | 1        | 0        | 4        | 2        | 1        | 7        | 0       | 1        | 0        | 9        | 0         | 2         |
| 3.3.2.9  | 0        | 0       | 0        | 0        | 0        | 0        | 0        | 0        | 0        | 0        | 0        | 0        | 0       | 0        | 0        | 0        | 0         | 0         |
| 3.5.1.-  | 23       | 7       | 48       | 13       | 14       | 16       | 19       | 5        | 14       | 21       | 11       | 32       | 7       | 15       | 6        | 41       | 3         | 6         |
| 3.5.1.4  | 4        | 1       | 3        | 1        | 1        | 2        | 0        | 0        | 0        | 2        | 1        | 5        | 1       | 2        | 1        | 4        | 0         | 0         |
| 3.5.1.5  | 2        | 0       | 5        | 1        | 2        | 1        | 5        | 0        | 0        | 1        | 1        | 1        | 1       | 3        | 2        | 6        | 0         | 0         |
| 3.5.1.54 | 4        | 0       | 3        | 3        | 1        | 2        | 0        | 0        | 0        | 5        | 1        | 3        | 0       | 0        | 0        | 4        | 0         | 0         |
| 3.5.1.6  | 1        | 1       | 2        | 0        | 3        | 1        | 2        | 0        | 1        | 3        | 0        | 1        | 1       | 0        | 0        | 1        | 0         | 0         |
| 3.5.2.-  | 0        | 0       | 0        | 0        | 0        | 0        | 0        | 0        | 0        | 0        | 0        | 0        | 0       | 0        | 0        | 0        | 0         | 0         |
| 3.5.2.2  | 1        | 1       | 2        | 0        | 0        | 2        | 1        | 1        | 0        | 0        | 0        | 1        | 0       | 0        | 0        | 0        | 0         | 0         |
| 3.5.4.-  | 20       | 11      | 47       | 22       | 14       | 19       | 18       | 6        | 12       | 34       | 9        | 35       | 11      | 25       | 5        | 36       | 7         | 5         |
| 3.5.4.5  | 14       | 7       | 30       | 13       | 9        | 18       | 19       | 2        | 11       | 17       | 8        | 19       | 5       | 9        | 6        | 15       | 5         | 4         |
| 3.5.5.1  | 0        | 1       | 1        | 1        | 1        | 0        | 0        | 0        | 1        | 2        | 0        | 1        | 0       | 0        | 1        | 2        | 1         | 0         |
| 3.5.5.7  | 0        | 0       | 0        | 0        | 0        | 0        | 0        | 0        | 0        | 0        | 0        | 0        | 0       | 0        | 0        | 0        | 0         | 0         |
| 3.5.99.3 | 0        | 1       | 0        | 0        | 0        | 0        | 0        | 0        | 0        | 0        | 0        | 0        | 0       | 0        | 0        | 1        | 0         | 0         |
| 3.6.1.7  | 4        | 2       | 9        | 5        | 7        | 4        | 1        | 3        | 3        | 2        | 2        | 6        | 2       | 2        | 2        | 5        | 1         | 0         |
| 3.7.1.-  | 0        | 1       | 1        | 1        | 1        | 1        | 2        | 0        | 0        | 1        | 0        | 1        | 0       | 2        | 0        | 3        | 1         | 0         |
| 3.7.1.2  | 2        | 3       | 10       | 5        | 3        | 4        | 7        | 2        | 4        | 8        | 6        | 5        | 4       | 6        | 2        | 6        | 4         | 2         |
| 3.8.1.2  | 5        | 2       | 15       | 5        | 2        | 7        | 9        | 3        | 5        | 12       | 5        | 6        | 3       | 9        | 5        | 9        | 5         | 4         |
| 3.8.1.3  | 0        | 0       | 0        | 0        | 0        | 0        | 0        | 0        | 0        | 0        | 0        | 0        | 0       | 0        | 0        | 1        | 0         | 0         |
| 3.8.1.5  | 0        | 0       | 0        | 0        | 0        | 0        | 0        | 0        | 0        | 0        | 0        | 0        | 0       | 0        | 0        | 0        | 0         | 0         |
| 4.1.1.-  | 12       | 7       | 30       | 11       | 7        | 14       | 13       | 2        | 4        | 16       | 9        | 7        | 5       | 12       | 7        | 13       | 7         | 5         |
| 4.1.1.44 | 24       | 13      | 54       | 26       | 22       | 24       | 39       | 8        | 11       | 40       | 13       | 28       | 7       | 30       | 10       | 49       | 14        | 8         |
| 4.1.1.55 | 0        | 0       | 0        | 0        | 0        | 0        | 0        | 0        | 0        | 0        | 0        | 0        | 0       | 0        | 0        | 0        | 0         | 0         |
| 4.1.1.7  | 0        | 0       | 0        | 0        | 0        | 0        | 0        | 0        | 0        | 0        | 0        | 0        | 0       | 0        | 0        | 0        | 0         | 0         |
| 4.1.1.70 | 1        | 0       | 0        | 1        | 0        | 1        | 0        | 0        | 0        | 1        | 0        | 0        | 0       | 0        | 0        | 0        | 0         | 0         |
| 4.1.1.77 | 0        | 0       | 0        | 0        | 0        | 0        | 0        | 0        | 0        | 0        | 0        | 0        | 0       | 0        | 0        | 0        | 0         | 0         |
| 4.1.2.-  | 8        | 3       | 5        | 1        | 5        | 3        | 8        | 3        | 4        | 7        | 0        | 8        | 0       | 4        | 1        | 11       | 3         | 3         |
| 4.1.3.-  | 21       | 4       | 29       | 20       | 16       | 16       | 17       | 6        | 11       | 17       | 6        | 11       | 6       | 15       | 7        | 30       | 6         | 6         |

| EC/KO    | AM-AD-79 | AM-AD-8 | AM-AD-80 | AM-AD-81 | AM-AD-82 | AM-AD-83 | AM-AD-84 | AM-AD-85 | AM-AD-86 | AM-AD-87 | AM-AD-88 | AM-AD-89 | AM-AD-9 | AM-AD-90 | AM-AD-91 | AM-AD-92 | CH-DLF001 | CH-DLF002 |
|----------|----------|---------|----------|----------|----------|----------|----------|----------|----------|----------|----------|----------|---------|----------|----------|----------|-----------|-----------|
| 4.1.3.39 | 0        | 0       | 0        | 0        | 0        | 0        | 3        | 0        | 0        | 0        | 0        | 0        | 0       | 0        | 1        | 0        | 0         | 1         |
| 4.1.99.- | 2        | 0       | 3        | 2        | 2        | 1        | 2        | 0        | 2        | 0        | 2        | 1        | 0       | 2        | 0        | 2        | 0         | 0         |
| 4.2.1.-  | 58       | 18      | 103      | 67       | 40       | 49       | 88       | 18       | 42       | 62       | 39       | 65       | 15      | 44       | 27       | 83       | 25        | 24        |
| 4.2.1.17 | 3        | 2       | 8        | 7        | 8        | 1        | 4        | 1        | 2        | 4        | 2        | 6        | 2       | 2        | 1        | 5        | 2         | 3         |
| 4.2.1.80 | 0        | 0       | 0        | 0        | 0        | 0        | 0        | 0        | 0        | 0        | 0        | 0        | 0       | 0        | 0        | 0        | 0         | 0         |
| 4.2.1.83 | 1        | 0       | 3        | 0        | 0        | 0        | 0        | 0        | 0        | 0        | 0        | 1        | 0       | 1        | 0        | 1        | 0         | 0         |
| 4.2.1.84 | 0        | 0       | 0        | 0        | 0        | 0        | 0        | 0        | 0        | 0        | 0        | 0        | 0       | 0        | 1        | 2        | 0         | 0         |
| 5.1.2.2  | 0        | 0       | 0        | 0        | 0        | 0        | 0        | 0        | 0        | 0        | 0        | 0        | 0       | 0        | 0        | 0        | 0         | 0         |
| 5.2.1.2  | 0        | 0       | 0        | 0        | 0        | 0        | 0        | 0        | 0        | 0        | 0        | 0        | 0       | 0        | 0        | 0        | 0         | 0         |
| 5.3.3.4  | 0        | 0       | 0        | 0        | 0        | 0        | 0        | 0        | 0        | 0        | 0        | 0        | 0       | 0        | 0        | 0        | 0         | 0         |
| 5.3.99.- | 0        | 1       | 5        | 0        | 4        | 4        | 4        | 1        | 1        | 3        | 3        | 2        | 0       | 3        | 0        | 8        | 3         | 0         |
| 5.4.99.- | 0        | 0       | 1        | 0        | 0        | 1        | 1        | 0        | 0        | 0        | 0        | 0        | 0       | 1        | 0        | 2        | 0         | 0         |
| 5.5.1.1  | 2        | 4       | 6        | 4        | 3        | 8        | 6        | 1        | 2        | 6        | 4        | 4        | 1       | 4        | 2        | 5        | 3         | 3         |
| 5.5.1.2  | 0        | 0       | 0        | 0        | 0        | 0        | 0        | 0        | 0        | 0        | 0        | 0        | 0       | 0        | 0        | 0        | 0         | 0         |
| 6.2.1.-  | 0        | 0       | 0        | 0        | 0        | 0        | 0        | 0        | 0        | 0        | 0        | 0        | 0       | 0        | 0        | 0        | 0         | 0         |
| 6.3.5.2  | 25       | 12      | 39       | 25       | 14       | 14       | 19       | 5        | 14       | 22       | 13       | 17       | 5       | 15       | 7        | 29       | 9         | 9         |
| K00002   | 2        | 1       | 2        | 1        | 0        | 0        | 4        | 0        | 0        | 3        | 0        | 2        | 0       | 0        | 1        | 0        | 0         | 0         |
| K00055   | 0        | 0       | 0        | 0        | 0        | 0        | 0        | 0        | 0        | 0        | 0        | 0        | 0       | 0        | 0        | 0        | 0         | 0         |
| K00074   | 6        | 0       | 9        | 6        | 12       | 3        | 7        | 0        | 6        | 4        | 0        | 9        | 0       | 5        | 0        | 10       | 1         | 1         |
| K00088   | 10       | 9       | 33       | 22       | 16       | 16       | 20       | 6        | 11       | 23       | 6        | 18       | 5       | 7        | 9        | 20       | 10        | 9         |
| K00100   | 57       | 22      | 99       | 58       | 45       | 46       | 56       | 27       | 31       | 73       | 36       | 55       | 18      | 50       | 18       | 84       | 11        | 18        |
| K00128   | 2        | 1       | 3        | 0        | 2        | 0        | 0        | 2        | 1        | 1        | 0        | 1        | 0       | 2        | 0        | 1        | 0         | 0         |
| K00129   | 0        | 0       | 0        | 0        | 0        | 0        | 0        | 0        | 0        | 0        | 0        | 0        | 0       | 0        | 0        | 0        | 0         | 0         |
| K00132   | 0        | 0       | 0        | 0        | 0        | 0        | 0        | 0        | 0        | 0        | 0        | 2        | 0       | 0        | 0        | 0        | 0         | 0         |
| K00141   | 0        | 0       | 0        | 0        | 0        | 0        | 0        | 0        | 0        | 0        | 0        | 0        | 0       | 0        | 0        | 0        | 0         | 0         |
| K00146   | 0        | 0       | 0        | 0        | 0        | 0        | 0        | 0        | 0        | 0        | 0        | 0        | 0       | 0        | 0        | 0        | 0         | 0         |
| K00148   | 0        | 0       | 0        | 0        | 0        | 0        | 0        | 0        | 0        | 0        | 0        | 0        | 0       | 0        | 0        | 0        | 0         | 0         |
| K00155   | 1        | 0       | 1        | 0        | 0        | 0        | 0        | 1        | 0        | 0        | 0        | 0        | 1       | 1        | 0        | 0        | 0         | 0         |
| K00169   | 3        | 0       | 2        | 1        | 2        | 0        | 3        | 1        | 1        | 1        | 1        | 2        | 1       | 0        | 0        | 3        | 0         | 1         |
| K00224   | 1        | 1       | 1        | 0        | 1        | 0        | 1        | 1        | 0        | 1        | 0        | 1        | 0       | 1        | 0        | 2        | 0         | 0         |
| K00274   | 0        | 0       | 0        | 0        | 0        | 0        | 0        | 0        | 0        | 0        | 0        | 0        | 0       | 0        | 0        | 0        | 0         | 0         |
| K00446   | 0        | 0       | 0        | 0        | 0        | 0        | 0        | 0        | 0        | 0        | 0        | 0        | 0       | 0        | 0        | 0        | 0         | 0         |
| K00448   | 0        | 0       | 0        | 0        | 0        | 0        | 0        | 0        | 0        | 0        | 0        | 0        | 0       | 0        | 0        | 0        | 0         | 0         |
| K00462   | 1        | 2       | 1        | 0        | 1        | 0        | 1        | 0        | 0        | 2        | 2        | 2        | 2       | 1        | 1        | 0        | 1         | 1         |
| K00480   | 0        | 0       | 0        | 0        | 0        | 0        | 0        | 0        | 0        | 0        | 0        | 0        | 0       | 0        | 0        | 0        | 0         | 0         |
| K00481   | 0        | 0       | 0        | 0        | 0        | 0        | 0        | 0        | 0        | 0        | 0        | 0        | 0       | 0        | 0        | 0        | 0         | 0         |
| K00539   | 0        | 1       | 1        | 1        | 1        | 0        | 0        | 0        | 0        | 1        | 0        | 1        | 1       | 1        | 0        | 2        | 0         | 0         |
| K00599   | 51       | 14      | 88       | 35       | 30       | 38       | 39       | 10       | 33       | 41       | 18       | 40       | 12      | 28       | 10       | 69       | 10        | 10        |
| K00626   | 4        | 1       | 3        | 4        | 4        | 3        | 6        | 1        | 3        | 2        | 0        | 5        | 0       | 0        | 0        | 6        | 1         | 3         |
| K00632   | 0        | 0       | 0        | 0        | 0        | 0        | 0        | 0        | 0        | 0        | 0        | 0        | 0       | 0        | 0        | 0        | 0         | 0         |
| K00680   | 41       | 17      | 73       | 48       | 33       | 41       | 49       | 10       | 27       | 46       | 27       | 53       | 13      | 45       | 16       | 63       | 25        | 17        |
| K00757   | 11       | 4       | 29       | 15       | 11       | 13       | 14       | 4        | 9        | 18       | 5        | 15       | 3       | 12       | 10       | 15       | 3         | 4         |
| K00758   | 3        | 0       | 4        | 1        | 3        | 1        | 3        | 0        | 0        | 0        | 0        | 3        | 0       | 0        | 0        | 7        | 0         | 0         |
| K00760   | 21       | 6       | 44       | 20       | 19       | 19       | 22       | 5        | 13       | 28       | 16       | 23       | 7       | 22       | 6        | 41       | 4         | 6         |
| K00799   | 0        | 0       | 0        | 0        | 0        | 0        | 0        | 0        | 0        | 0        | 0        | 1        | 0       | 0        | 0        | 0        | 0         | 0         |
| K00857   | 8        | 1       | 22       | 13       | 7        | 13       | 14       | 3        | 7        | 16       | 7        | 15       | 4       | 9        | 2        | 16       | 3         | 5         |
| K00876   | 25       | 8       | 58       | 30       | 22       | 28       | 32       | 5        | 15       | 37       | 15       | 32       | 7       | 19       | 12       | 40       | 9         | 12        |
| K01026   | 0        | 0       | 1        | 2        | 2        | 1        | 0        | 0        | 0        | 1        | 0        | 1        | 0       | 0        | 0        | 2        | 0         | 0         |
| K01031   | 0        | 0       | 0        | 0        | 0        | 0        | 0        | 0        | 0        | 0        | 0        | 0        | 0       | 0        | 0        | 0        | 0         | 0         |

| EC/KO  | AM-AD-79 | AM-AD-8 | AM-AD-80 | AM-AD-81 | AM-AD-82 | AM-AD-83 | AM-AD-84 | AM-AD-85 | AM-AD-86 | AM-AD-87 | AM-AD-88 | AM-AD-89 | AM-AD-9 | AM-AD-90 | AM-AD-91 | AM-AD-92 | CH-DLF001 | CH-DLF002 |
|--------|----------|---------|----------|----------|----------|----------|----------|----------|----------|----------|----------|----------|---------|----------|----------|----------|-----------|-----------|
| K01034 | 0        | 0       | 2        | 1        | 1        | 0        | 2        | 0        | 0        | 1        | 1        | 2        | 0       | 2        | 0        | 1        | 0         | 1         |
| K01039 | 0        | 0       | 0        | 0        | 0        | 0        | 0        | 0        | 0        | 0        | 0        | 1        | 0       | 0        | 0        | 2        | 0         | 0         |
| K01041 | 4        | 2       | 9        | 5        | 2        | 5        | 9        | 2        | 3        | 5        | 7        | 8        | 2       | 6        | 6        | 2        | 5         | 4         |
| K01053 | 0        | 0       | 0        | 0        | 0        | 0        | 0        | 0        | 0        | 0        | 0        | 0        | 0       | 0        | 0        | 0        | 0         | 0         |
| K01055 | 0        | 0       | 0        | 0        | 0        | 0        | 0        | 0        | 0        | 0        | 0        | 0        | 0       | 0        | 0        | 0        | 0         | 0         |
| K01061 | 0        | 0       | 0        | 0        | 0        | 0        | 0        | 0        | 0        | 0        | 0        | 0        | 0       | 0        | 0        | 0        | 0         | 0         |
| K01066 | 5        | 2       | 14       | 6        | 3        | 7        | 10       | 1        | 3        | 12       | 3        | 11       | 2       | 5        | 3        | 9        | 5         | 3         |
| K01075 | 0        | 2       | 1        | 0        | 2        | 0        | 1        | 0        | 0        | 1        | 0        | 1        | 1       | 1        | 0        | 1        | 0         | 1         |
| K01077 | 8        | 2       | 15       | 14       | 5        | 12       | 18       | 4        | 7        | 20       | 10       | 12       | 2       | 6        | 10       | 11       | 7         | 7         |
| K01101 | 2        | 2       | 7        | 3        | 3        | 2        | 6        | 0        | 0        | 4        | 0        | 3        | 1       | 1        | 0        | 5        | 0         | 0         |
| K01195 | 9        | 4       | 15       | 6        | 10       | 10       | 12       | 1        | 6        | 10       | 6        | 8        | 2       | 5        | 4        | 13       | 4         | 3         |
| K01426 | 1        | 1       | 1        | 1        | 0        | 2        | 1        | 1        | 0        | 0        | 0        | 1        | 1       | 0        | 0        | 1        | 0         | 0         |
| K01428 | 1        | 1       | 4        | 2        | 0        | 2        | 0        | 0        | 0        | 1        | 0        | 3        | 0       | 1        | 0        | 4        | 1         | 0         |
| K01457 | 0        | 0       | 0        | 0        | 0        | 0        | 0        | 0        | 0        | 0        | 0        | 0        | 0       | 0        | 0        | 0        | 0         | 0         |
| K01464 | 1        | 1       | 1        | 1        | 2        | 4        | 1        | 1        | 0        | 1        | 0        | 2        | 0       | 0        | 0        | 0        | 0         | 0         |
| K01489 | 15       | 7       | 39       | 18       | 13       | 20       | 19       | 2        | 12       | 26       | 10       | 23       | 5       | 10       | 6        | 23       | 7         | 5         |
| K01500 | 0        | 0       | 0        | 0        | 0        | 0        | 0        | 0        | 0        | 0        | 0        | 0        | 0       | 0        | 0        | 0        | 0         | 0         |
| K01501 | 1        | 1       | 1        | 3        | 2        | 1        | 1        | 0        | 1        | 1        | 0        | 2        | 0       | 0        | 0        | 1        | 0         | 0         |
| K01502 | 0        | 0       | 0        | 0        | 0        | 0        | 0        | 0        | 0        | 0        | 0        | 0        | 0       | 0        | 0        | 0        | 0         | 0         |
| K01512 | 7        | 2       | 14       | 7        | 11       | 6        | 2        | 4        | 6        | 4        | 4        | 8        | 2       | 8        | 3        | 12       | 1         | 1         |
| K01560 | 3        | 1       | 10       | 4        | 9        | 4        | 2        | 0        | 3        | 4        | 0        | 6        | 0       | 1        | 0        | 8        | 1         | 1         |
| K01561 | 0        | 1       | 0        | 0        | 0        | 0        | 1        | 0        | 0        | 0        | 0        | 0        | 0       | 0        | 0        | 0        | 0         | 0         |
| K01563 | 0        | 0       | 0        | 0        | 0        | 0        | 0        | 0        | 0        | 0        | 0        | 0        | 0       | 0        | 0        | 0        | 0         | 0         |
| K01564 | 1        | 2       | 3        | 2        | 1        | 4        | 1        | 0        | 0        | 5        | 1        | 2        | 0       | 3        | 0        | 5        | 1         | 0         |
| K01607 | 10       | 4       | 30       | 17       | 6        | 14       | 20       | 6        | 5        | 20       | 9        | 20       | 4       | 16       | 8        | 27       | 4         | 3         |
| K01612 | 0        | 0       | 0        | 0        | 0        | 0        | 0        | 0        | 0        | 0        | 0        | 0        | 0       | 0        | 0        | 0        | 0         | 0         |
| K01615 | 12       | 4       | 26       | 18       | 15       | 20       | 13       | 1        | 13       | 13       | 10       | 18       | 6       | 8        | 10       | 16       | 9         | 7         |
| K01617 | 0        | 0       | 0        | 0        | 0        | 0        | 0        | 0        | 0        | 0        | 0        | 0        | 0       | 0        | 0        | 0        | 0         | 0         |
| K01666 | 4        | 0       | 13       | 5        | 5        | 3        | 6        | 0        | 5        | 3        | 1        | 4        | 1       | 5        | 1        | 9        | 1         | 4         |
| K01692 | 0        | 0       | 0        | 0        | 0        | 0        | 0        | 0        | 0        | 0        | 0        | 1        | 0       | 0        | 0        | 0        | 0         | 0         |
| K01721 | 0        | 0       | 0        | 0        | 0        | 0        | 0        | 0        | 0        | 0        | 0        | 0        | 0       | 0        | 0        | 0        | 0         | 0         |
| K01726 | 9        | 3       | 11       | 9        | 4        | 11       | 15       | 3        | 3        | 11       | 5        | 8        | 5       | 7        | 5        | 14       | 7         | 5         |
| K01781 | 1        | 0       | 0        | 2        | 2        | 0        | 1        | 0        | 0        | 0        | 0        | 1        | 1       | 1        | 0        | 0        | 0         | 1         |
| K01821 | 0        | 1       | 1        | 1        | 3        | 4        | 2        | 0        | 0        | 1        | 0        | 2        | 0       | 2        | 0        | 2        | 0         | 0         |
| K01856 | 0        | 0       | 0        | 0        | 0        | 0        | 0        | 0        | 0        | 0        | 0        | 0        | 0       | 0        | 0        | 0        | 0         | 0         |
| K01857 | 0        | 1       | 1        | 0        | 0        | 0        | 0        | 1        | 0        | 1        | 0        | 0        | 0       | 1        | 0        | 0        | 0         | 0         |
| K01913 | 0        | 0       | 0        | 1        | 0        | 0        | 1        | 0        | 0        | 0        | 0        | 1        | 0       | 0        | 0        | 1        | 0         | 0         |
| K01951 | 16       | 9       | 28       | 23       | 14       | 12       | 16       | 4        | 8        | 16       | 10       | 14       | 4       | 12       | 7        | 13       | 7         | 7         |
| K02554 | 0        | 0       | 0        | 0        | 0        | 0        | 0        | 0        | 0        | 0        | 0        | 0        | 0       | 0        | 0        | 0        | 0         | 0         |
| K03381 | 0        | 0       | 0        | 0        | 0        | 0        | 0        | 0        | 0        | 0        | 0        | 0        | 0       | 0        | 0        | 0        | 0         | 0         |
| K03382 | 0        | 1       | 3        | 0        | 0        | 1        | 0        | 0        | 0        | 1        | 0        | 2        | 0       | 0        | 0        | 1        | 0         | 0         |
| K03464 | 0        | 0       | 0        | 0        | 0        | 0        | 0        | 0        | 0        | 0        | 0        | 0        | 0       | 0        | 0        | 0        | 0         | 0         |
| K03518 | 7        | 4       | 12       | 11       | 13       | 8        | 4        | 2        | 6        | 5        | 2        | 12       | 0       | 2        | 1        | 13       | 1         | 3         |
| K03862 | 0        | 0       | 0        | 0        | 0        | 0        | 0        | 0        | 0        | 0        | 0        | 0        | 0       | 0        | 0        | 0        | 0         | 0         |
| K04099 | 0        | 0       | 0        | 0        | 0        | 0        | 0        | 0        | 0        | 0        | 0        | 0        | 0       | 0        | 0        | 0        | 0         | 0         |
| K04100 | 0        | 0       | 0        | 0        | 0        | 0        | 0        | 0        | 0        | 0        | 0        | 0        | 0       | 0        | 0        | 0        | 0         | 0         |
| K04102 | 0        | 0       | 0        | 0        | 0        | 0        | 0        | 0        | 0        | 0        | 0        | 0        | 0       | 0        | 0        | 0        | 0         | 0         |
| K04116 | 0        | 0       | 0        | 0        | 0        | 0        | 0        | 0        | 0        | 0        | 0        | 0        | 0       | 0        | 0        | 0        | 0         | 0         |
| K05394 | 1        | 1       | 1        | 1        | 1        | 0        | 0        | 1        | 0        | 1        | 0        | 0        | 1       | 1        | 1        | 0        | 0         | 0         |



| EC/KO  | AM-AD-79 | AM-AD-8 | AM-AD-80 | AM-AD-81 | AM-AD-82 | AM-AD-83 | AM-AD-84 | AM-AD-85 | AM-AD-86 | AM-AD-87 | AM-AD-88 | AM-AD-89 | AM-AD-9 | AM-AD-90 | AM-AD-91 | AM-AD-92 | CH-DLF001 | CH-DLF002 |
|--------|----------|---------|----------|----------|----------|----------|----------|----------|----------|----------|----------|----------|---------|----------|----------|----------|-----------|-----------|
| K05549 | 0        | 0       | 0        | 0        | 0        | 0        | 0        | 0        | 0        | 0        | 0        | 0        | 0       | 0        | 0        | 0        | 0         | 0         |
| K05783 | 0        | 0       | 0        | 0        | 0        | 0        | 0        | 0        | 0        | 0        | 0        | 0        | 0       | 0        | 0        | 0        | 0         | 0         |
| K05797 | 0        | 0       | 0        | 0        | 0        | 0        | 0        | 0        | 0        | 0        | 0        | 0        | 0       | 0        | 0        | 0        | 0         | 0         |
| K06281 | 3        | 2       | 3        | 2        | 1        | 0        | 3        | 1        | 1        | 3        | 1        | 1        | 1       | 3        | 1        | 3        | 1         | 0         |
| K06446 | 7        | 0       | 5        | 4        | 2        | 6        | 5        | 0        | 1        | 4        | 3        | 4        | 0       | 0        | 2        | 8        | 0         | 2         |
| K06912 | 0        | 0       | 0        | 0        | 0        | 0        | 0        | 0        | 0        | 0        | 0        | 0        | 0       | 0        | 0        | 0        | 0         | 0         |
| K07535 | 0        | 0       | 0        | 0        | 0        | 0        | 1        | 0        | 0        | 0        | 0        | 0        | 0       | 0        | 0        | 0        | 0         | 0         |
| K07536 | 3        | 1       | 4        | 1        | 2        | 3        | 4        | 0        | 2        | 4        | 1        | 1        | 1       | 5        | 2        | 3        | 1         | 2         |
| K08689 | 0        | 0       | 0        | 0        | 0        | 0        | 0        | 0        | 0        | 0        | 0        | 0        | 0       | 0        | 0        | 0        | 0         | 0         |
| K08710 | 1        | 0       | 0        | 0        | 0        | 0        | 0        | 0        | 0        | 0        | 0        | 0        | 0       | 0        | 0        | 0        | 0         | 0         |
| K09461 | 0        | 0       | 0        | 0        | 0        | 0        | 0        | 0        | 0        | 0        | 0        | 0        | 0       | 0        | 0        | 0        | 0         | 0         |
| K10217 | 0        | 0       | 0        | 0        | 0        | 0        | 0        | 0        | 0        | 0        | 0        | 0        | 0       | 0        | 0        | 0        | 0         | 0         |
| K10218 | 0        | 0       | 0        | 1        | 1        | 0        | 0        | 0        | 1        | 0        | 0        | 0        | 0       | 0        | 0        | 0        | 0         | 0         |
| K10220 | 0        | 0       | 0        | 0        | 0        | 0        | 0        | 0        | 0        | 0        | 0        | 0        | 0       | 0        | 0        | 0        | 0         | 0         |
| K11180 | 0        | 0       | 0        | 0        | 0        | 0        | 0        | 0        | 0        | 0        | 0        | 0        | 0       | 0        | 0        | 0        | 0         | 0         |
| K13953 | 0        | 0       | 0        | 0        | 1        | 1        | 0        | 0        | 0        | 0        | 0        | 0        | 0       | 0        | 0        | 0        | 0         | 0         |
| K14333 | 0        | 0       | 0        | 0        | 0        | 0        | 0        | 0        | 0        | 0        | 0        | 0        | 0       | 0        | 0        | 0        | 0         | 0         |
| K14519 | 0        | 0       | 0        | 0        | 0        | 0        | 0        | 0        | 0        | 0        | 0        | 0        | 0       | 0        | 0        | 0        | 0         | 0         |
| K15054 | 0        | 0       | 0        | 0        | 0        | 0        | 0        | 0        | 0        | 0        | 0        | 0        | 0       | 0        | 0        | 0        | 0         | 0         |
| K16173 | 0        | 0       | 0        | 0        | 0        | 0        | 0        | 0        | 0        | 1        | 0        | 0        | 0       | 0        | 0        | 1        | 0         | 0         |
| K16514 | 1        | 1       | 0        | 0        | 0        | 0        | 0        | 0        | 0        | 0        | 0        | 0        | 0       | 0        | 0        | 0        | 0         | 0         |
| K16874 | 0        | 0       | 0        | 0        | 0        | 0        | 0        | 0        | 0        | 0        | 0        | 0        | 0       | 0        | 0        | 0        | 0         | 0         |

| EC/KO      | CH-DLF003 | CH-DLF004 | CH-DLF005 | CH-DLF006 | CH-DLF007 | CH-DLF008 | CH-DLF009 | CH-DLF010 | CH-DLF012 | CH-DLF013 | CH-DLF014 | CH-DLM001 | CH-DLM002 | CH-DLM003 | CH-DLM004 | CH-DLM005 |
|------------|-----------|-----------|-----------|-----------|-----------|-----------|-----------|-----------|-----------|-----------|-----------|-----------|-----------|-----------|-----------|-----------|
| 1.1.1.-    | 14        | 39        | 24        | 37        | 26        | 47        | 24        | 30        | 37        | 38        | 49        | 59        | 35        | 26        | 27        | 37        |
| 1.1.1.1    | 20        | 24        | 42        | 22        | 12        | 30        | 16        | 31        | 36        | 28        | 41        | 46        | 27        | 13        | 12        | 22        |
| 1.1.1.157  | 0         | 0         | 1         | 1         | 0         | 0         | 0         | 2         | 0         | 1         | 0         | 1         | 0         | 2         | 0         | 1         |
| 1.1.1.205  | 12        | 16        | 19        | 10        | 9         | 9         | 7         | 17        | 11        | 12        | 17        | 33        | 20        | 17        | 14        | 12        |
| 1.1.1.35   | 0         | 0         | 1         | 0         | 1         | 1         | 4         | 2         | 0         | 2         | 2         | 3         | 1         | 0         | 0         | 1         |
| 1.12.99.6  | 0         | 0         | 1         | 4         | 1         | 3         | 2         | 0         | 2         | 0         | 0         | 4         | 1         | 1         | 1         | 3         |
| 1.13.11.-  | 0         | 0         | 0         | 0         | 0         | 0         | 0         | 0         | 0         | 0         | 0         | 0         | 0         | 0         | 0         | 0         |
| 1.13.11.1  | 0         | 0         | 0         | 0         | 0         | 0         | 0         | 0         | 0         | 0         | 0         | 0         | 0         | 0         | 0         | 0         |
| 1.13.11.2  | 0         | 0         | 0         | 0         | 0         | 0         | 0         | 0         | 0         | 0         | 0         | 0         | 0         | 0         | 0         | 0         |
| 1.13.11.3  | 0         | 0         | 0         | 0         | 0         | 0         | 0         | 2         | 0         | 0         | 0         | 0         | 0         | 0         | 0         | 0         |
| 1.13.11.39 | 0         | 0         | 0         | 0         | 0         | 0         | 0         | 0         | 1         | 0         | 0         | 0         | 0         | 0         | 0         | 0         |
| 1.13.11.5  | 0         | 0         | 0         | 0         | 0         | 0         | 0         | 0         | 0         | 0         | 0         | 0         | 0         | 0         | 0         | 0         |
| 1.13.11.8  | 0         | 0         | 0         | 0         | 0         | 0         | 0         | 1         | 0         | 0         | 0         | 0         | 0         | 0         | 0         | 0         |
| 1.14.12.10 | 0         | 0         | 0         | 0         | 0         | 1         | 1         | 1         | 1         | 1         | 0         | 0         | 0         | 0         | 0         | 1         |
| 1.14.12.13 | 0         | 0         | 0         | 0         | 0         | 0         | 0         | 0         | 0         | 0         | 0         | 0         | 0         | 0         | 0         | 0         |
| 1.14.12.18 | 0         | 0         | 0         | 0         | 0         | 0         | 0         | 0         | 0         | 0         | 0         | 0         | 0         | 0         | 0         | 0         |
| 1.14.13.-  | 0         | 0         | 0         | 0         | 0         | 3         | 1         | 5         | 3         | 0         | 0         | 0         | 0         | 0         | 0         | 4         |
| 1.14.13.1  | 0         | 0         | 0         | 0         | 0         | 0         | 0         | 0         | 0         | 0         | 0         | 0         | 0         | 0         | 0         | 0         |
| 1.14.13.2  | 0         | 0         | 0         | 0         | 0         | 0         | 0         | 1         | 0         | 0         | 0         | 0         | 0         | 0         | 0         | 0         |
| 1.14.13.50 | 0         | 0         | 0         | 0         | 0         | 0         | 0         | 0         | 0         | 0         | 0         | 0         | 0         | 0         | 0         | 0         |
| 1.14.13.7  | 0         | 1         | 0         | 0         | 1         | 0         | 0         | 0         | 0         | 0         | 0         | 0         | 0         | 0         | 0         | 0         |
| 1.14.13.8  | 0         | 0         | 0         | 0         | 0         | 0         | 0         | 0         | 0         | 0         | 0         | 0         | 0         | 0         | 0         | 0         |
| 1.14.13.82 | 0         | 0         | 0         | 0         | 0         | 0         | 0         | 0         | 0         | 0         | 0         | 0         | 0         | 0         | 0         | 0         |
| 1.14.99.-  | 0         | 0         | 0         | 0         | 0         | 0         | 1         | 0         | 0         | 0         | 0         | 0         | 0         | 0         | 0         | 0         |
| 1.17.99.1  | 0         | 0         | 0         | 0         | 0         | 0         | 0         | 0         | 0         | 0         | 0         | 0         | 0         | 0         | 0         | 0         |
| 1.18.6.1   | 0         | 0         | 0         | 0         | 0         | 0         | 0         | 0         | 0         | 0         | 0         | 0         | 0         | 0         | 0         | 0         |
| 1.2.1.-    | 0         | 0         | 0         | 0         | 0         | 0         | 1         | 0         | 0         | 0         | 0         | 0         | 0         | 0         | 0         | 0         |
| 1.2.1.10   | 2         | 2         | 11        | 2         | 3         | 4         | 1         | 6         | 8         | 6         | 9         | 4         | 7         | 0         | 2         | 4         |
| 1.2.1.3    | 1         | 4         | 5         | 5         | 7         | 8         | 6         | 8         | 7         | 4         | 12        | 7         | 5         | 1         | 3         | 7         |
| 1.2.1.39   | 0         | 0         | 0         | 0         | 0         | 1         | 0         | 0         | 0         | 0         | 0         | 0         | 0         | 0         | 0         | 1         |
| 1.2.7.1    | 8         | 7         | 9         | 4         | 3         | 6         | 5         | 10        | 0         | 5         | 1         | 17        | 10        | 5         | 4         | 5         |
| 1.2.99.2   | 0         | 1         | 2         | 2         | 1         | 5         | 0         | 3         | 7         | 1         | 3         | 3         | 1         | 1         | 0         | 3         |
| 1.3.1.-    | 0         | 0         | 0         | 0         | 0         | 0         | 1         | 0         | 1         | 0         | 0         | 0         | 0         | 1         | 0         | 0         |
| 1.3.1.2    | 0         | 0         | 2         | 1         | 0         | 2         | 1         | 0         | 0         | 0         | 0         | 1         | 0         | 1         | 1         | 1         |
| 1.3.1.25   | 0         | 0         | 0         | 0         | 0         | 0         | 0         | 0         | 0         | 0         | 0         | 0         | 0         | 0         | 0         | 0         |
| 1.3.99.-   | 0         | 0         | 0         | 0         | 0         | 0         | 1         | 0         | 2         | 0         | 0         | 1         | 0         | 0         | 0         | 1         |
| 1.6.5.-    | 21        | 33        | 29        | 34        | 15        | 18        | 14        | 32        | 8         | 37        | 13        | 66        | 42        | 28        | 29        | 32        |
| 1.7.1.-    | 6         | 6         | 8         | 5         | 6         | 6         | 1         | 8         | 4         | 7         | 9         | 8         | 17        | 6         | 5         | 12        |
| 1.8.99.3   | 0         | 0         | 0         | 1         | 0         | 0         | 0         | 0         | 0         | 0         | 0         | 0         | 0         | 0         | 0         | 1         |
| 2.1.1.-    | 101       | 125       | 205       | 133       | 90        | 106       | 108       | 189       | 147       | 165       | 151       | 222       | 188       | 108       | 96        | 130       |
| 2.3.1.-    | 62        | 97        | 98        | 104       | 84        | 106       | 57        | 109       | 67        | 100       | 71        | 166       | 141       | 84        | 62        | 98        |
| 2.3.1.16   | 1         | 2         | 0         | 1         | 0         | 3         | 0         | 2         | 1         | 0         | 2         | 1         | 2         | 0         | 0         | 2         |
| 2.3.1.5    | 0         | 0         | 0         | 1         | 0         | 1         | 0         | 0         | 0         | 0         | 0         | 0         | 0         | 0         | 0         | 1         |
| 2.3.1.9    | 1         | 1         | 0         | 1         | 0         | 3         | 1         | 0         | 2         | 0         | 2         | 0         | 1         | 0         | 0         | 1         |
| 2.4.2.10   | 6         | 7         | 13        | 11        | 4         | 4         | 10        | 12        | 9         | 7         | 8         | 19        | 8         | 5         | 5         | 9         |
| 2.4.2.3    | 3         | 5         | 5         | 5         | 3         | 5         | 3         | 8         | 7         | 3         | 4         | 5         | 5         | 3         | 3         | 4         |
| 2.4.2.4    | 3         | 1         | 3         | 4         | 0         | 0         | 0         | 6         | 2         | 1         | 2         | 2         | 2         | 0         | 0         | 1         |
| 2.4.2.8    | 8         | 11        | 12        | 6         | 6         | 7         | 5         | 12        | 7         | 10        | 7         | 11        | 10        | 11        | 6         | 6         |
| 2.5.1.-    | 13        | 14        | 15        | 13        | 11        | 11        | 13        | 16        | 8         | 19        | 5         | 30        | 19        | 14        | 12        | 15        |

| EC/KO    | CH-DLF003 | CH-DLF004 | CH-DLF005 | CH-DLF006 | CH-DLF007 | CH-DLF008 | CH-DLF009 | CH-DLF010 | CH-DLF012 | CH-DLF013 | CH-DLF014 | CH-DLM001 | CH-DLM002 | CH-DLM003 | CH-DLM004 | CH-DLM005 |
|----------|-----------|-----------|-----------|-----------|-----------|-----------|-----------|-----------|-----------|-----------|-----------|-----------|-----------|-----------|-----------|-----------|
| 2.5.1.18 | 0         | 0         | 1         | 4         | 1         | 6         | 2         | 8         | 5         | 1         | 5         | 1         | 1         | 0         | 0         | 5         |
| 2.6.1.-  | 14        | 23        | 16        | 15        | 18        | 18        | 9         | 28        | 9         | 15        | 15        | 34        | 32        | 13        | 16        | 19        |
| 2.7.1.21 | 3         | 6         | 4         | 5         | 2         | 3         | 1         | 4         | 3         | 5         | 4         | 7         | 2         | 8         | 4         | 7         |
| 2.7.1.48 | 13        | 19        | 22        | 13        | 11        | 12        | 6         | 13        | 12        | 20        | 13        | 26        | 24        | 14        | 11        | 12        |
| 2.7.4.-  | 10        | 10        | 11        | 8         | 6         | 6         | 5         | 8         | 8         | 13        | 6         | 22        | 13        | 5         | 4         | 9         |
| 2.8.3.-  | 0         | 2         | 1         | 5         | 2         | 3         | 6         | 1         | 2         | 0         | 1         | 3         | 3         | 0         | 1         | 3         |
| 2.8.3.1  | 0         | 0         | 1         | 1         | 1         | 0         | 0         | 0         | 0         | 0         | 0         | 1         | 0         | 0         | 0         | 1         |
| 2.8.3.12 | 0         | 0         | 0         | 3         | 0         | 0         | 0         | 0         | 0         | 0         | 1         | 1         | 1         | 0         | 0         | 0         |
| 2.8.3.6  | 0         | 0         | 0         | 1         | 0         | 0         | 0         | 1         | 0         | 0         | 0         | 0         | 1         | 0         | 0         | 1         |
| 2.8.3.8  | 0         | 1         | 2         | 3         | 2         | 3         | 1         | 0         | 3         | 2         | 4         | 0         | 1         | 1         | 0         | 3         |
| 3.1.1.-  | 3         | 3         | 2         | 5         | 3         | 6         | 2         | 3         | 4         | 2         | 5         | 8         | 5         | 1         | 6         | 7         |
| 3.1.1.1  | 2         | 3         | 5         | 2         | 3         | 3         | 2         | 5         | 2         | 2         | 2         | 8         | 10        | 4         | 5         | 3         |
| 3.1.1.17 | 0         | 3         | 0         | 2         | 1         | 0         | 0         | 3         | 0         | 2         | 0         | 0         | 0         | 1         | 2         | 1         |
| 3.1.1.2  | 0         | 0         | 0         | 1         | 0         | 1         | 0         | 0         | 1         | 0         | 0         | 0         | 0         | 0         | 0         | 1         |
| 3.1.1.24 | 0         | 0         | 2         | 3         | 1         | 1         | 0         | 3         | 3         | 2         | 2         | 2         | 0         | 0         | 0         | 2         |
| 3.1.1.45 | 0         | 0         | 0         | 1         | 0         | 1         | 0         | 1         | 0         | 0         | 0         | 1         | 0         | 0         | 0         | 1         |
| 3.1.2.-  | 0         | 1         | 0         | 2         | 0         | 2         | 2         | 1         | 2         | 1         | 1         | 3         | 0         | 0         | 1         | 2         |
| 3.1.2.23 | 2         | 3         | 3         | 2         | 2         | 4         | 3         | 3         | 0         | 2         | 1         | 7         | 5         | 2         | 2         | 5         |
| 3.1.3.1  | 8         | 15        | 11        | 9         | 12        | 10        | 8         | 9         | 3         | 11        | 8         | 21        | 15        | 15        | 15        | 7         |
| 3.1.3.2  | 3         | 7         | 4         | 3         | 5         | 4         | 2         | 5         | 3         | 5         | 3         | 7         | 4         | 7         | 3         | 5         |
| 3.1.3.41 | 0         | 0         | 0         | 0         | 0         | 0         | 1         | 0         | 0         | 0         | 0         | 1         | 0         | 0         | 0         | 0         |
| 3.2.1.31 | 0         | 1         | 2         | 1         | 1         | 2         | 2         | 0         | 4         | 2         | 0         | 3         | 5         | 0         | 0         | 1         |
| 3.3.2.9  | 0         | 0         | 0         | 0         | 0         | 0         | 0         | 0         | 0         | 0         | 0         | 0         | 0         | 0         | 0         | 0         |
| 3.5.1.-  | 19        | 9         | 17        | 9         | 6         | 7         | 7         | 13        | 10        | 10        | 8         | 15        | 17        | 6         | 9         | 13        |
| 3.5.1.4  | 0         | 2         | 2         | 3         | 1         | 1         | 0         | 3         | 3         | 1         | 3         | 5         | 3         | 1         | 0         | 2         |
| 3.5.1.5  | 0         | 0         | 1         | 0         | 0         | 0         | 0         | 2         | 0         | 0         | 2         | 1         | 0         | 2         | 0         | 0         |
| 3.5.1.54 | 3         | 0         | 1         | 4         | 0         | 1         | 2         | 2         | 3         | 4         | 0         | 2         | 0         | 0         | 0         | 0         |
| 3.5.1.6  | 0         | 0         | 2         | 1         | 1         | 1         | 0         | 1         | 0         | 0         | 3         | 2         | 1         | 0         | 1         | 0         |
| 3.5.2.-  | 0         | 0         | 0         | 0         | 0         | 0         | 0         | 0         | 0         | 0         | 0         | 0         | 0         | 0         | 0         | 0         |
| 3.5.2.2  | 0         | 1         | 0         | 1         | 1         | 2         | 0         | 1         | 1         | 1         | 3         | 2         | 2         | 0         | 0         | 0         |
| 3.5.4.-  | 15        | 9         | 20        | 9         | 10        | 9         | 12        | 15        | 7         | 13        | 9         | 24        | 20        | 11        | 9         | 17        |
| 3.5.4.5  | 7         | 8         | 9         | 5         | 4         | 5         | 5         | 9         | 3         | 9         | 3         | 10        | 6         | 6         | 5         | 7         |
| 3.5.5.1  | 0         | 1         | 0         | 0         | 2         | 2         | 0         | 1         | 0         | 1         | 2         | 1         | 0         | 1         | 1         | 1         |
| 3.5.5.7  | 0         | 0         | 0         | 0         | 0         | 0         | 0         | 0         | 0         | 0         | 1         | 0         | 0         | 0         | 0         | 0         |
| 3.5.99.3 | 0         | 0         | 0         | 0         | 1         | 1         | 0         | 0         | 0         | 1         | 0         | 0         | 0         | 0         | 0         | 0         |
| 3.6.1.7  | 1         | 1         | 5         | 1         | 0         | 2         | 2         | 2         | 4         | 5         | 4         | 3         | 2         | 1         | 0         | 3         |
| 3.7.1.-  | 1         | 0         | 2         | 1         | 0         | 1         | 0         | 2         | 3         | 3         | 2         | 1         | 1         | 0         | 0         | 2         |
| 3.7.1.2  | 0         | 2         | 1         | 3         | 2         | 3         | 4         | 3         | 1         | 4         | 1         | 10        | 4         | 5         | 4         | 3         |
| 3.8.1.2  | 3         | 4         | 1         | 5         | 6         | 5         | 2         | 5         | 5         | 5         | 3         | 8         | 7         | 6         | 6         | 6         |
| 3.8.1.3  | 0         | 0         | 0         | 0         | 0         | 0         | 0         | 0         | 0         | 0         | 0         | 0         | 0         | 0         | 0         | 0         |
| 3.8.1.5  | 0         | 1         | 0         | 1         | 1         | 1         | 3         | 1         | 1         | 1         | 1         | 1         | 0         | 0         | 0         | 0         |
| 4.1.1.-  | 4         | 7         | 5         | 10        | 5         | 10        | 4         | 9         | 3         | 10        | 6         | 27        | 8         | 8         | 6         | 12        |
| 4.1.1.44 | 9         | 13        | 15        | 16        | 11        | 9         | 11        | 13        | 10        | 11        | 11        | 27        | 16        | 10        | 15        | 15        |
| 4.1.1.55 | 0         | 0         | 0         | 0         | 0         | 0         | 0         | 0         | 0         | 0         | 0         | 0         | 0         | 0         | 0         | 0         |
| 4.1.1.7  | 0         | 0         | 0         | 0         | 0         | 0         | 0         | 0         | 0         | 0         | 0         | 0         | 0         | 0         | 0         | 0         |
| 4.1.1.70 | 0         | 0         | 0         | 0         | 0         | 0         | 0         | 1         | 0         | 0         | 0         | 0         | 0         | 0         | 0         | 0         |
| 4.1.1.77 | 0         | 0         | 0         | 0         | 0         | 0         | 0         | 0         | 0         | 0         | 0         | 0         | 0         | 0         | 0         | 0         |
| 4.1.2.-  | 6         | 2         | 6         | 5         | 1         | 9         | 3         | 3         | 8         | 7         | 3         | 5         | 5         | 0         | 2         | 5         |
| 4.1.3.-  | 9         | 12        | 11        | 6         | 5         | 7         | 4         | 15        | 9         | 9         | 7         | 15        | 16        | 5         | 9         | 6         |

| EC/KO    | CH-DLF003 | CH-DLF004 | CH-DLF005 | CH-DLF006 | CH-DLF007 | CH-DLF008 | CH-DLF009 | CH-DLF010 | CH-DLF012 | CH-DLF013 | CH-DLF014 | CH-DLM001 | CH-DLM002 | CH-DLM003 | CH-DLM004 | CH-DLM005 |
|----------|-----------|-----------|-----------|-----------|-----------|-----------|-----------|-----------|-----------|-----------|-----------|-----------|-----------|-----------|-----------|-----------|
| 4.1.3.39 | 0         | 1         | 0         | 0         | 0         | 0         | 0         | 1         | 0         | 0         | 0         | 0         | 0         | 0         | 1         | 1         |
| 4.1.99.- | 0         | 1         | 4         | 0         | 1         | 0         | 1         | 3         | 0         | 0         | 1         | 0         | 2         | 0         | 0         | 0         |
| 4.2.1.-  | 13        | 30        | 33        | 31        | 25        | 32        | 21        | 28        | 22        | 28        | 21        | 53        | 38        | 38        | 27        | 25        |
| 4.2.1.17 | 3         | 2         | 6         | 2         | 1         | 3         | 4         | 2         | 3         | 2         | 2         | 3         | 3         | 3         | 3         | 4         |
| 4.2.1.80 | 0         | 1         | 0         | 0         | 0         | 0         | 0         | 0         | 0         | 0         | 0         | 0         | 0         | 0         | 0         | 0         |
| 4.2.1.83 | 1         | 1         | 1         | 0         | 0         | 0         | 0         | 0         | 0         | 0         | 0         | 0         | 1         | 0         | 0         | 0         |
| 4.2.1.84 | 1         | 0         | 0         | 0         | 0         | 0         | 0         | 0         | 0         | 0         | 0         | 0         | 1         | 0         | 0         | 0         |
| 5.1.2.2  | 0         | 0         | 0         | 0         | 0         | 0         | 0         | 0         | 0         | 0         | 0         | 0         | 0         | 0         | 0         | 0         |
| 5.2.1.2  | 0         | 0         | 0         | 0         | 0         | 0         | 0         | 0         | 0         | 0         | 0         | 0         | 0         | 0         | 0         | 0         |
| 5.3.3.4  | 0         | 0         | 0         | 0         | 0         | 0         | 0         | 0         | 0         | 0         | 0         | 0         | 0         | 0         | 0         | 0         |
| 5.3.99.- | 0         | 1         | 0         | 6         | 4         | 3         | 2         | 1         | 2         | 2         | 2         | 1         | 1         | 1         | 1         | 2         |
| 5.4.99.- | 0         | 1         | 0         | 2         | 0         | 0         | 1         | 0         | 0         | 1         | 0         | 0         | 0         | 1         | 0         | 1         |
| 5.5.1.1  | 2         | 3         | 3         | 1         | 2         | 5         | 2         | 1         | 0         | 5         | 1         | 6         | 2         | 2         | 4         | 3         |
| 5.5.1.2  | 0         | 0         | 0         | 0         | 0         | 0         | 0         | 0         | 0         | 0         | 0         | 0         | 0         | 0         | 0         | 0         |
| 6.2.1.-  | 0         | 0         | 0         | 0         | 0         | 0         | 0         | 0         | 0         | 0         | 0         | 0         | 0         | 0         | 0         | 0         |
| 6.3.5.2  | 6         | 14        | 16        | 14        | 13        | 13        | 10        | 11        | 14        | 15        | 10        | 25        | 20        | 9         | 10        | 17        |
| K00002   | 0         | 0         | 0         | 0         | 0         | 0         | 0         | 2         | 0         | 0         | 2         | 1         | 0         | 0         | 0         | 0         |
| K00055   | 0         | 0         | 0         | 0         | 1         | 1         | 0         | 1         | 0         | 0         | 1         | 0         | 0         | 0         | 0         | 0         |
| K00074   | 3         | 1         | 2         | 6         | 1         | 1         | 4         | 7         | 2         | 7         | 5         | 9         | 3         | 1         | 0         | 4         |
| K00088   | 7         | 14        | 15        | 11        | 10        | 12        | 7         | 12        | 12        | 9         | 15        | 30        | 20        | 7         | 9         | 12        |
| K00100   | 21        | 28        | 33        | 31        | 20        | 31        | 16        | 28        | 27        | 31        | 33        | 69        | 30        | 22        | 24        | 31        |
| K00128   | 0         | 1         | 0         | 0         | 1         | 0         | 3         | 0         | 3         | 0         | 2         | 2         | 2         | 0         | 0         | 1         |
| K00129   | 0         | 0         | 0         | 0         | 0         | 0         | 0         | 0         | 0         | 0         | 0         | 0         | 0         | 0         | 0         | 0         |
| K00132   | 0         | 0         | 0         | 0         | 0         | 0         | 0         | 0         | 0         | 0         | 1         | 1         | 0         | 0         | 0         | 1         |
| K00141   | 0         | 0         | 0         | 0         | 0         | 0         | 0         | 0         | 0         | 0         | 0         | 0         | 0         | 0         | 0         | 0         |
| K00146   | 0         | 0         | 0         | 0         | 0         | 1         | 0         | 1         | 0         | 0         | 0         | 0         | 0         | 0         | 0         | 1         |
| K00148   | 0         | 0         | 0         | 0         | 0         | 0         | 0         | 0         | 0         | 0         | 0         | 0         | 0         | 0         | 0         | 0         |
| K00155   | 0         | 0         | 0         | 1         | 0         | 0         | 0         | 0         | 1         | 0         | 0         | 0         | 0         | 1         | 0         | 0         |
| K00169   | 0         | 1         | 3         | 0         | 1         | 3         | 1         | 2         | 0         | 0         | 1         | 2         | 2         | 0         | 0         | 0         |
| K00224   | 0         | 0         | 0         | 0         | 0         | 0         | 0         | 0         | 0         | 0         | 0         | 1         | 0         | 0         | 0         | 0         |
| K00274   | 0         | 0         | 0         | 0         | 0         | 0         | 0         | 0         | 0         | 0         | 0         | 0         | 0         | 0         | 0         | 0         |
| K00446   | 0         | 0         | 0         | 0         | 0         | 0         | 0         | 0         | 0         | 0         | 0         | 0         | 0         | 0         | 0         | 0         |
| K00448   | 0         | 0         | 0         | 0         | 0         | 0         | 0         | 1         | 0         | 0         | 0         | 0         | 0         | 0         | 0         | 0         |
| K00462   | 1         | 0         | 0         | 0         | 2         | 0         | 0         | 0         | 0         | 1         | 1         | 3         | 0         | 1         | 1         | 1         |
| K00480   | 0         | 0         | 0         | 0         | 0         | 0         | 0         | 0         | 0         | 0         | 0         | 0         | 0         | 0         | 0         | 0         |
| K00481   | 0         | 0         | 0         | 0         | 0         | 0         | 0         | 1         | 0         | 0         | 0         | 0         | 0         | 0         | 0         | 0         |
| K00539   | 0         | 0         | 0         | 0         | 0         | 0         | 0         | 0         | 0         | 0         | 0         | 1         | 0         | 0         | 1         | 0         |
| K00599   | 16        | 27        | 30        | 20        | 18        | 20        | 18        | 24        | 17        | 19        | 23        | 36        | 31        | 17        | 13        | 15        |
| K00626   | 3         | 4         | 1         | 4         | 1         | 5         | 3         | 2         | 3         | 2         | 7         | 5         | 5         | 0         | 0         | 4         |
| K00632   | 0         | 0         | 0         | 0         | 0         | 0         | 0         | 0         | 0         | 0         | 0         | 0         | 0         | 0         | 0         | 0         |
| K00680   | 18        | 30        | 24        | 22        | 15        | 19        | 22        | 16        | 20        | 29        | 13        | 41        | 29        | 25        | 17        | 27        |
| K00757   | 7         | 10        | 5         | 7         | 6         | 8         | 5         | 6         | 3         | 10        | 3         | 16        | 8         | 7         | 8         | 6         |
| K00758   | 4         | 0         | 3         | 2         | 0         | 1         | 1         | 2         | 1         | 0         | 3         | 2         | 2         | 0         | 0         | 3         |
| K00760   | 4         | 12        | 18        | 12        | 6         | 7         | 8         | 15        | 10        | 13        | 12        | 16        | 13        | 12        | 7         | 8         |
| K00799   | 0         | 0         | 0         | 2         | 1         | 2         | 2         | 4         | 2         | 0         | 1         | 0         | 0         | 0         | 0         | 2         |
| K00857   | 7         | 7         | 8         | 9         | 2         | 3         | 4         | 6         | 6         | 10        | 6         | 12        | 4         | 11        | 4         | 9         |
| K00876   | 15        | 18        | 25        | 12        | 10        | 10        | 8         | 17        | 9         | 22        | 16        | 32        | 31        | 14        | 11        | 15        |
| K01026   | 0         | 1         | 1         | 1         | 1         | 3         | 0         | 0         | 0         | 2         | 6         | 0         | 1         | 1         | 0         | 2         |
| K01031   | 0         | 0         | 0         | 0         | 0         | 0         | 0         | 0         | 0         | 0         | 0         | 0         | 0         | 0         | 0         | 0         |

| EC/KO  | CH-DLF003 | CH-DLF004 | CH-DLF005 | CH-DLF006 | CH-DLF007 | CH-DLF008 | CH-DLF009 | CH-DLF010 | CH-DLF012 | CH-DLF013 | CH-DLF014 | CH-DLM001 | CH-DLM002 | CH-DLM003 | CH-DLM004 | CH-DLM005 |
|--------|-----------|-----------|-----------|-----------|-----------|-----------|-----------|-----------|-----------|-----------|-----------|-----------|-----------|-----------|-----------|-----------|
| K01034 | 0         | 0         | 1         | 1         | 0         | 1         | 1         | 1         | 1         | 2         | 0         | 2         | 0         | 1         | 0         | 1         |
| K01039 | 0         | 0         | 0         | 1         | 0         | 0         | 0         | 0         | 0         | 0         | 1         | 1         | 0         | 0         | 0         | 0         |
| K01041 | 3         | 8         | 3         | 5         | 5         | 3         | 2         | 3         | 2         | 5         | 2         | 16        | 4         | 4         | 5         | 6         |
| K01053 | 0         | 0         | 0         | 0         | 0         | 0         | 0         | 1         | 0         | 0         | 0         | 0         | 0         | 0         | 0         | 0         |
| K01055 | 0         | 0         | 0         | 0         | 0         | 0         | 0         | 0         | 0         | 0         | 0         | 0         | 0         | 0         | 0         | 0         |
| K01061 | 0         | 0         | 0         | 1         | 0         | 1         | 0         | 1         | 1         | 0         | 0         | 1         | 0         | 0         | 0         | 1         |
| K01066 | 2         | 1         | 5         | 2         | 1         | 4         | 3         | 3         | 3         | 4         | 4         | 9         | 4         | 2         | 2         | 3         |
| K01075 | 0         | 0         | 0         | 1         | 0         | 1         | 0         | 1         | 1         | 0         | 0         | 1         | 0         | 0         | 1         | 1         |
| K01077 | 1         | 6         | 3         | 6         | 5         | 5         | 5         | 4         | 3         | 7         | 4         | 10        | 5         | 9         | 7         | 4         |
| K01101 | 1         | 1         | 1         | 4         | 1         | 2         | 2         | 1         | 5         | 4         | 3         | 5         | 2         | 1         | 1         | 3         |
| K01195 | 2         | 1         | 3         | 3         | 4         | 5         | 2         | 2         | 2         | 4         | 3         | 9         | 7         | 0         | 3         | 3         |
| K01426 | 0         | 1         | 0         | 1         | 1         | 2         | 1         | 0         | 0         | 0         | 2         | 2         | 1         | 0         | 0         | 0         |
| K01428 | 0         | 0         | 1         | 0         | 0         | 0         | 0         | 0         | 1         | 0         | 2         | 0         | 0         | 2         | 0         | 0         |
| K01457 | 0         | 0         | 0         | 0         | 0         | 0         | 0         | 0         | 0         | 0         | 0         | 0         | 0         | 0         | 0         | 0         |
| K01464 | 0         | 1         | 0         | 2         | 2         | 6         | 1         | 3         | 2         | 1         | 6         | 3         | 1         | 1         | 0         | 2         |
| K01489 | 10        | 10        | 11        | 8         | 5         | 5         | 6         | 15        | 2         | 11        | 5         | 14        | 8         | 8         | 5         | 10        |
| K01500 | 0         | 0         | 0         | 0         | 0         | 0         | 0         | 0         | 0         | 1         | 0         | 0         | 0         | 0         | 0         | 0         |
| K01501 | 0         | 1         | 0         | 1         | 1         | 2         | 1         | 2         | 0         | 2         | 4         | 2         | 0         | 0         | 0         | 1         |
| K01502 | 0         | 0         | 0         | 0         | 0         | 0         | 0         | 0         | 0         | 0         | 1         | 0         | 0         | 0         | 0         | 0         |
| K01512 | 2         | 2         | 6         | 4         | 0         | 3         | 2         | 4         | 6         | 8         | 6         | 6         | 3         | 1         | 0         | 4         |
| K01560 | 1         | 2         | 0         | 0         | 2         | 0         | 4         | 5         | 2         | 5         | 2         | 5         | 3         | 1         | 0         | 1         |
| K01561 | 0         | 0         | 0         | 1         | 0         | 1         | 0         | 0         | 0         | 0         | 0         | 2         | 1         | 0         | 0         | 0         |
| K01563 | 0         | 0         | 0         | 0         | 0         | 0         | 0         | 0         | 0         | 0         | 0         | 0         | 0         | 0         | 0         | 0         |
| K01564 | 0         | 1         | 1         | 5         | 0         | 0         | 1         | 0         | 1         | 1         | 1         | 3         | 2         | 2         | 0         | 3         |
| K01607 | 4         | 7         | 6         | 6         | 4         | 4         | 3         | 10        | 6         | 7         | 3         | 12        | 6         | 4         | 5         | 9         |
| K01612 | 0         | 0         | 0         | 0         | 0         | 0         | 0         | 0         | 0         | 0         | 0         | 0         | 0         | 0         | 0         | 0         |
| K01615 | 7         | 11        | 10        | 10        | 7         | 8         | 5         | 17        | 4         | 13        | 5         | 21        | 8         | 9         | 9         | 9         |
| K01617 | 0         | 0         | 0         | 0         | 0         | 0         | 0         | 0         | 0         | 0         | 0         | 0         | 0         | 0         | 0         | 0         |
| K01666 | 2         | 2         | 8         | 0         | 2         | 0         | 0         | 3         | 0         | 2         | 3         | 2         | 5         | 0         | 1         | 1         |
| K01692 | 0         | 0         | 0         | 0         | 0         | 0         | 0         | 0         | 0         | 0         | 0         | 0         | 0         | 0         | 0         | 1         |
| K01721 | 0         | 0         | 0         | 0         | 0         | 0         | 0         | 0         | 0         | 0         | 0         | 0         | 0         | 0         | 0         | 0         |
| K01726 | 4         | 6         | 2         | 5         | 6         | 8         | 1         | 2         | 4         | 6         | 3         | 9         | 8         | 1         | 5         | 5         |
| K01781 | 0         | 0         | 0         | 0         | 1         | 3         | 0         | 0         | 0         | 0         | 1         | 0         | 0         | 0         | 1         | 0         |
| K01821 | 0         | 2         | 0         | 1         | 0         | 1         | 0         | 0         | 1         | 1         | 3         | 1         | 1         | 1         | 1         | 2         |
| K01856 | 0         | 0         | 0         | 0         | 0         | 0         | 0         | 0         | 0         | 0         | 0         | 0         | 0         | 0         | 0         | 0         |
| K01857 | 0         | 0         | 0         | 0         | 0         | 0         | 0         | 0         | 0         | 0         | 1         | 1         | 0         | 0         | 0         | 0         |
| K01913 | 0         | 0         | 0         | 0         | 0         | 0         | 0         | 0         | 0         | 0         | 0         | 0         | 1         | 0         | 1         | 0         |
| K01951 | 6         | 12        | 15        | 13        | 8         | 9         | 9         | 10        | 11        | 15        | 14        | 22        | 17        | 8         | 7         | 8         |
| K02554 | 0         | 0         | 0         | 0         | 0         | 0         | 0         | 1         | 0         | 0         | 0         | 0         | 0         | 0         | 0         | 0         |
| K03381 | 0         | 0         | 0         | 0         | 0         | 0         | 0         | 0         | 0         | 0         | 0         | 0         | 0         | 0         | 0         | 0         |
| K03382 | 0         | 0         | 0         | 0         | 1         | 2         | 2         | 2         | 0         | 1         | 0         | 0         | 0         | 0         | 0         | 0         |
| K03464 | 0         | 0         | 0         | 0         | 0         | 0         | 0         | 0         | 0         | 0         | 0         | 0         | 0         | 0         | 0         | 0         |
| K03518 | 1         | 2         | 4         | 3         | 9         | 11        | 3         | 9         | 6         | 6         | 10        | 4         | 5         | 2         | 3         | 4         |
| K03862 | 0         | 0         | 0         | 0         | 0         | 0         | 0         | 0         | 0         | 0         | 0         | 0         | 0         | 0         | 0         | 0         |
| K04099 | 0         | 0         | 0         | 0         | 0         | 0         | 0         | 0         | 0         | 0         | 0         | 0         | 0         | 0         | 0         | 0         |
| K04100 | 0         | 0         | 0         | 0         | 0         | 0         | 0         | 1         | 0         | 0         | 0         | 0         | 0         | 0         | 0         | 0         |
| K04102 | 0         | 0         | 0         | 0         | 0         | 0         | 0         | 0         | 0         | 0         | 0         | 0         | 0         | 0         | 0         | 0         |
| K04116 | 0         | 0         | 0         | 0         | 0         | 0         | 0         | 0         | 0         | 0         | 0         | 0         | 0         | 0         | 0         | 0         |
| K05394 | 1         | 0         | 0         | 0         | 0         | 0         | 0         | 3         | 0         | 0         | 2         | 0         | 0         | 0         | 1         | 0         |

| EC/KO  | CH-DLF003 | CH-DLF004 | CH-DLF005 | CH-DLF006 | CH-DLF007 | CH-DLF008 | CH-DLF009 | CH-DLF010 | CH-DLF012 | CH-DLF013 | CH-DLF014 | CH-DLM001 | CH-DLM002 | CH-DLM003 | CH-DLM004 | CH-DLM005 |
|--------|-----------|-----------|-----------|-----------|-----------|-----------|-----------|-----------|-----------|-----------|-----------|-----------|-----------|-----------|-----------|-----------|
| K05549 | 0         | 0         | 0         | 0         | 0         | 0         | 0         | 1         | 0         | 0         | 0         | 0         | 0         | 0         | 0         | 0         |
| K05783 | 0         | 0         | 0         | 0         | 0         | 0         | 0         | 0         | 0         | 0         | 0         | 0         | 0         | 0         | 0         | 0         |
| K05797 | 0         | 0         | 0         | 0         | 0         | 0         | 0         | 0         | 0         | 0         | 0         | 0         | 0         | 0         | 0         | 0         |
| K06281 | 0         | 0         | 1         | 3         | 1         | 2         | 2         | 0         | 1         | 0         | 1         | 4         | 1         | 1         | 1         | 1         |
| K06446 | 3         | 5         | 4         | 5         | 0         | 2         | 4         | 2         | 1         | 3         | 6         | 12        | 2         | 1         | 3         | 5         |
| K06912 | 0         | 0         | 0         | 0         | 0         | 0         | 0         | 0         | 0         | 0         | 0         | 0         | 0         | 0         | 0         | 0         |
| K07535 | 0         | 0         | 0         | 0         | 0         | 0         | 0         | 0         | 0         | 0         | 0         | 0         | 0         | 0         | 0         | 0         |
| K07536 | 1         | 2         | 2         | 4         | 1         | 3         | 2         | 1         | 2         | 3         | 0         | 2         | 0         | 2         | 1         | 2         |
| K08689 | 0         | 0         | 0         | 0         | 0         | 0         | 0         | 0         | 0         | 0         | 0         | 0         | 0         | 0         | 0         | 0         |
| K08710 | 0         | 0         | 0         | 0         | 0         | 1         | 0         | 0         | 0         | 0         | 1         | 0         | 0         | 0         | 1         | 0         |
| K09461 | 0         | 0         | 0         | 0         | 0         | 0         | 1         | 0         | 0         | 0         | 0         | 0         | 0         | 0         | 0         | 0         |
| K10217 | 0         | 0         | 0         | 0         | 0         | 0         | 0         | 0         | 0         | 0         | 0         | 0         | 0         | 0         | 0         | 1         |
| K10218 | 0         | 0         | 0         | 1         | 0         | 0         | 0         | 2         | 0         | 0         | 0         | 3         | 1         | 0         | 0         | 1         |
| K10220 | 0         | 0         | 0         | 0         | 0         | 0         | 0         | 0         | 0         | 0         | 0         | 0         | 0         | 0         | 0         | 0         |
| K11180 | 0         | 0         | 0         | 0         | 0         | 0         | 0         | 0         | 0         | 0         | 0         | 0         | 0         | 0         | 0         | 0         |
| K13953 | 0         | 0         | 0         | 0         | 0         | 1         | 1         | 0         | 1         | 0         | 2         | 1         | 0         | 1         | 0         | 1         |
| K14333 | 0         | 0         | 0         | 0         | 0         | 0         | 0         | 1         | 0         | 0         | 0         | 0         | 0         | 0         | 0         | 0         |
| K14519 | 0         | 0         | 0         | 0         | 0         | 0         | 0         | 0         | 0         | 0         | 0         | 0         | 0         | 0         | 0         | 0         |
| K15054 | 0         | 0         | 0         | 0         | 0         | 0         | 0         | 0         | 0         | 0         | 0         | 0         | 0         | 0         | 0         | 1         |
| K16173 | 0         | 1         | 2         | 1         | 0         | 0         | 0         | 0         | 0         | 0         | 3         | 1         | 0         | 0         | 0         | 1         |
| K16514 | 0         | 0         | 0         | 1         | 0         | 1         | 0         | 0         | 0         | 0         | 1         | 0         | 0         | 0         | 0         | 1         |
| K16874 | 0         | 0         | 0         | 0         | 0         | 0         | 0         | 0         | 0         | 0         | 0         | 1         | 0         | 0         | 0         | 0         |

| EC/KO      | CH-DLM006 | CH-DLM007 | CH-DLM008 | CH-DLM009 | CH-DLM010 | CH-DLM011 | CH-DLM012 | CH-DLM014 | CH-DLM015 | CH-DLM016 | CH-DLM017 | CH-DLM018 | CH-DLM019 | CH-DLM020 | CH-DLM021 | CH-DLM022 |
|------------|-----------|-----------|-----------|-----------|-----------|-----------|-----------|-----------|-----------|-----------|-----------|-----------|-----------|-----------|-----------|-----------|
| 1.1.1.-    | 22        | 20        | 25        | 26        | 53        | 26        | 34        | 54        | 38        | 40        | 33        | 31        | 37        | 49        | 33        | 54        |
| 1.1.1.1    | 16        | 18        | 27        | 31        | 36        | 21        | 41        | 29        | 21        | 25        | 30        | 32        | 37        | 23        | 27        | 49        |
| 1.1.1.157  | 0         | 0         | 0         | 0         | 1         | 0         | 0         | 1         | 0         | 1         | 1         | 2         | 2         | 0         | 0         | 1         |
| 1.1.1.205  | 16        | 10        | 16        | 16        | 13        | 15        | 13        | 28        | 22        | 15        | 12        | 14        | 24        | 18        | 13        | 33        |
| 1.1.1.35   | 1         | 0         | 4         | 1         | 3         | 0         | 2         | 2         | 1         | 3         | 0         | 2         | 2         | 0         | 1         | 6         |
| 1.12.99.6  | 0         | 0         | 0         | 7         | 0         | 2         | 3         | 1         | 3         | 1         | 2         | 1         | 1         | 1         | 0         | 6         |
| 1.13.11.-  | 0         | 0         | 0         | 0         | 0         | 0         | 0         | 0         | 0         | 0         | 0         | 0         | 0         | 0         | 0         | 0         |
| 1.13.11.1  | 0         | 0         | 0         | 0         | 0         | 0         | 0         | 0         | 0         | 0         | 0         | 0         | 0         | 0         | 0         | 0         |
| 1.13.11.2  | 0         | 0         | 0         | 0         | 0         | 0         | 0         | 0         | 0         | 0         | 0         | 0         | 0         | 0         | 0         | 0         |
| 1.13.11.3  | 0         | 0         | 0         | 0         | 0         | 0         | 0         | 0         | 0         | 0         | 0         | 0         | 0         | 0         | 0         | 0         |
| 1.13.11.39 | 0         | 0         | 0         | 0         | 0         | 0         | 0         | 0         | 0         | 0         | 0         | 0         | 0         | 0         | 0         | 0         |
| 1.13.11.5  | 0         | 0         | 0         | 0         | 0         | 1         | 0         | 0         | 0         | 0         | 0         | 0         | 0         | 0         | 0         | 1         |
| 1.13.11.8  | 0         | 0         | 0         | 0         | 1         | 0         | 0         | 0         | 0         | 0         | 0         | 0         | 0         | 0         | 0         | 0         |
| 1.14.12.10 | 0         | 0         | 0         | 0         | 0         | 0         | 1         | 0         | 0         | 0         | 0         | 0         | 0         | 0         | 1         | 0         |
| 1.14.12.13 | 0         | 0         | 0         | 0         | 0         | 0         | 0         | 0         | 0         | 0         | 0         | 0         | 0         | 0         | 0         | 0         |
| 1.14.12.18 | 0         | 0         | 0         | 0         | 0         | 0         | 0         | 0         | 0         | 0         | 0         | 0         | 0         | 0         | 0         | 0         |
| 1.14.13.-  | 0         | 0         | 0         | 0         | 2         | 0         | 3         | 0         | 0         | 0         | 0         | 0         | 2         | 0         | 0         | 1         |
| 1.14.13.1  | 0         | 0         | 0         | 0         | 1         | 0         | 0         | 0         | 0         | 0         | 0         | 0         | 0         | 0         | 0         | 0         |
| 1.14.13.2  | 0         | 0         | 0         | 0         | 1         | 0         | 0         | 0         | 0         | 0         | 0         | 0         | 0         | 0         | 0         | 0         |
| 1.14.13.50 | 0         | 0         | 0         | 0         | 0         | 0         | 0         | 0         | 0         | 0         | 0         | 0         | 0         | 0         | 0         | 0         |
| 1.14.13.7  | 1         | 0         | 0         | 0         | 0         | 0         | 0         | 1         | 0         | 0         | 0         | 0         | 0         | 0         | 1         | 0         |
| 1.14.13.8  | 0         | 0         | 0         | 0         | 0         | 0         | 0         | 0         | 0         | 0         | 0         | 0         | 0         | 0         | 0         | 0         |
| 1.14.13.82 | 0         | 0         | 0         | 0         | 0         | 0         | 0         | 0         | 0         | 0         | 0         | 0         | 0         | 0         | 0         | 0         |
| 1.14.99.-  | 0         | 0         | 0         | 0         | 0         | 0         | 0         | 0         | 0         | 0         | 0         | 0         | 0         | 0         | 0         | 0         |
| 1.17.99.1  | 0         | 0         | 0         | 0         | 0         | 0         | 0         | 0         | 0         | 0         | 0         | 0         | 0         | 0         | 0         | 0         |
| 1.18.6.1   | 0         | 0         | 0         | 0         | 1         | 0         | 0         | 0         | 0         | 0         | 0         | 0         | 0         | 0         | 0         | 0         |
| 1.2.1.-    | 0         | 0         | 0         | 0         | 1         | 0         | 3         | 0         | 0         | 0         | 0         | 0         | 0         | 0         | 0         | 1         |
| 1.2.1.10   | 6         | 1         | 2         | 4         | 6         | 0         | 4         | 4         | 7         | 6         | 4         | 7         | 10        | 2         | 1         | 16        |
| 1.2.1.3    | 3         | 3         | 1         | 8         | 6         | 3         | 9         | 3         | 8         | 3         | 3         | 9         | 6         | 5         | 5         | 10        |
| 1.2.1.39   | 0         | 0         | 0         | 0         | 0         | 0         | 1         | 0         | 0         | 0         | 0         | 0         | 0         | 0         | 0         | 0         |
| 1.2.7.1    | 7         | 4         | 7         | 5         | 5         | 3         | 0         | 9         | 6         | 4         | 5         | 3         | 13        | 5         | 10        | 23        |
| 1.2.99.2   | 1         | 0         | 2         | 5         | 2         | 2         | 6         | 2         | 3         | 3         | 2         | 2         | 6         | 1         | 2         | 4         |
| 1.3.1.-    | 0         | 1         | 0         | 0         | 1         | 1         | 0         | 3         | 0         | 1         | 1         | 0         | 0         | 1         | 0         | 0         |
| 1.3.1.2    | 1         | 1         | 2         | 0         | 0         | 0         | 1         | 1         | 0         | 1         | 0         | 0         | 0         | 1         | 1         | 2         |
| 1.3.1.25   | 0         | 0         | 0         | 0         | 0         | 0         | 0         | 0         | 0         | 0         | 0         | 0         | 0         | 0         | 0         | 0         |
| 1.3.99.-   | 0         | 0         | 0         | 0         | 0         | 0         | 1         | 0         | 0         | 0         | 0         | 0         | 0         | 1         | 0         | 1         |
| 1.6.5.-    | 32        | 33        | 35        | 12        | 32        | 28        | 15        | 68        | 37        | 38        | 33        | 20        | 38        | 37        | 34        | 56        |
| 1.7.1.-    | 9         | 8         | 4         | 7         | 6         | 7         | 3         | 16        | 6         | 11        | 6         | 7         | 9         | 8         | 4         | 7         |
| 1.8.99.3   | 0         | 0         | 0         | 0         | 0         | 0         | 0         | 0         | 0         | 0         | 0         | 0         | 0         | 0         | 0         | 0         |
| 2.1.1.-    | 135       | 128       | 151       | 140       | 163       | 106       | 135       | 209       | 149       | 151       | 179       | 177       | 255       | 140       | 156       | 353       |
| 2.3.1.-    | 75        | 97        | 93        | 66        | 115       | 78        | 73        | 177       | 118       | 119       | 84        | 89        | 135       | 119       | 91        | 193       |
| 2.3.1.16   | 2         | 1         | 4         | 0         | 2         | 0         | 1         | 2         | 1         | 2         | 1         | 1         | 1         | 2         | 1         | 3         |
| 2.3.1.5    | 0         | 0         | 0         | 1         | 0         | 0         | 1         | 0         | 0         | 0         | 0         | 0         | 0         | 0         | 0         | 0         |
| 2.3.1.9    | 0         | 1         | 0         | 1         | 2         | 0         | 5         | 0         | 1         | 1         | 0         | 1         | 1         | 2         | 1         | 4         |
| 2.4.2.10   | 9         | 8         | 13        | 8         | 8         | 5         | 9         | 11        | 9         | 11        | 8         | 16        | 11        | 4         | 9         | 21        |
| 2.4.2.3    | 6         | 4         | 5         | 2         | 6         | 2         | 5         | 4         | 7         | 6         | 2         | 3         | 7         | 1         | 4         | 15        |
| 2.4.2.4    | 2         | 0         | 1         | 3         | 2         | 1         | 3         | 0         | 2         | 1         | 2         | 3         | 4         | 1         | 2         | 11        |
| 2.4.2.8    | 9         | 5         | 5         | 8         | 11        | 4         | 8         | 8         | 9         | 11        | 8         | 6         | 14        | 8         | 6         | 26        |
| 2.5.1.-    | 16        | 12        | 11        | 10        | 13        | 12        | 15        | 29        | 16        | 15        | 16        | 13        | 19        | 19        | 12        | 18        |

| EC/KO    | CH-DLM006 | CH-DLM007 | CH-DLM008 | CH-DLM009 | CH-DLM010 | CH-DLM011 | CH-DLM012 | CH-DLM014 | CH-DLM015 | CH-DLM016 | CH-DLM017 | CH-DLM018 | CH-DLM019 | CH-DLM020 | CH-DLM021 | CH-DLM022 |
|----------|-----------|-----------|-----------|-----------|-----------|-----------|-----------|-----------|-----------|-----------|-----------|-----------|-----------|-----------|-----------|-----------|
| 2.5.1.18 | 0         | 0         | 0         | 3         | 4         | 4         | 4         | 0         | 0         | 1         | 1         | 1         | 1         | 0         | 1         | 2         |
| 2.6.1.-  | 21        | 21        | 26        | 10        | 29        | 21        | 23        | 42        | 35        | 21        | 25        | 16        | 23        | 23        | 13        | 30        |
| 2.7.1.21 | 5         | 4         | 3         | 5         | 7         | 5         | 3         | 12        | 7         | 7         | 4         | 4         | 8         | 5         | 4         | 6         |
| 2.7.1.48 | 18        | 16        | 14        | 10        | 20        | 15        | 9         | 39        | 18        | 19        | 12        | 14        | 25        | 16        | 17        | 31        |
| 2.7.4.-  | 10        | 9         | 13        | 4         | 12        | 9         | 10        | 14        | 9         | 8         | 14        | 11        | 15        | 9         | 11        | 25        |
| 2.8.3.-  | 2         | 0         | 0         | 1         | 1         | 3         | 1         | 1         | 4         | 2         | 1         | 0         | 1         | 3         | 1         | 4         |
| 2.8.3.1  | 0         | 0         | 0         | 1         | 0         | 0         | 0         | 0         | 0         | 0         | 0         | 1         | 0         | 0         | 0         | 1         |
| 2.8.3.12 | 0         | 0         | 1         | 0         | 0         | 0         | 0         | 0         | 0         | 0         | 0         | 1         | 0         | 0         | 0         | 0         |
| 2.8.3.6  | 0         | 0         | 1         | 0         | 0         | 1         | 0         | 0         | 0         | 0         | 0         | 0         | 0         | 0         | 0         | 2         |
| 2.8.3.8  | 0         | 1         | 4         | 2         | 1         | 0         | 1         | 1         | 1         | 0         | 1         | 2         | 2         | 0         | 1         | 4         |
| 3.1.1.-  | 3         | 0         | 5         | 7         | 9         | 5         | 4         | 3         | 8         | 3         | 0         | 3         | 3         | 3         | 3         | 11        |
| 3.1.1.1  | 2         | 0         | 3         | 3         | 2         | 9         | 2         | 8         | 5         | 8         | 4         | 7         | 3         | 9         | 4         | 4         |
| 3.1.1.17 | 0         | 0         | 1         | 0         | 2         | 1         | 0         | 2         | 2         | 4         | 3         | 0         | 1         | 4         | 1         | 3         |
| 3.1.1.2  | 0         | 1         | 0         | 1         | 1         | 1         | 1         | 0         | 0         | 0         | 0         | 0         | 0         | 0         | 0         | 2         |
| 3.1.1.24 | 0         | 1         | 2         | 1         | 0         | 1         | 1         | 5         | 1         | 0         | 0         | 2         | 7         | 0         | 0         | 4         |
| 3.1.1.45 | 0         | 0         | 0         | 0         | 1         | 0         | 0         | 0         | 0         | 0         | 0         | 0         | 0         | 0         | 0         | 1         |
| 3.1.2.-  | 0         | 0         | 0         | 0         | 0         | 1         | 2         | 0         | 0         | 0         | 0         | 2         | 1         | 0         | 0         | 0         |
| 3.1.2.23 | 1         | 6         | 1         | 0         | 6         | 3         | 2         | 9         | 4         | 3         | 6         | 3         | 4         | 5         | 4         | 5         |
| 3.1.3.1  | 8         | 14        | 9         | 4         | 13        | 14        | 4         | 30        | 15        | 21        | 17        | 11        | 10        | 25        | 17        | 15        |
| 3.1.3.2  | 5         | 5         | 5         | 3         | 7         | 9         | 3         | 9         | 7         | 6         | 2         | 2         | 4         | 8         | 4         | 3         |
| 3.1.3.41 | 0         | 0         | 0         | 0         | 0         | 0         | 0         | 0         | 0         | 0         | 0         | 1         | 0         | 0         | 0         | 0         |
| 3.2.1.31 | 4         | 0         | 2         | 1         | 5         | 2         | 1         | 4         | 2         | 3         | 5         | 4         | 2         | 1         | 1         | 2         |
| 3.3.2.9  | 0         | 0         | 0         | 0         | 1         | 0         | 0         | 0         | 0         | 0         | 0         | 0         | 0         | 0         | 0         | 0         |
| 3.5.1.-  | 14        | 9         | 10        | 7         | 15        | 9         | 7         | 13        | 11        | 13        | 9         | 16        | 24        | 5         | 10        | 31        |
| 3.5.1.4  | 1         | 1         | 1         | 3         | 1         | 1         | 1         | 1         | 3         | 3         | 1         | 3         | 4         | 1         | 1         | 2         |
| 3.5.1.5  | 0         | 2         | 0         | 1         | 1         | 0         | 0         | 2         | 0         | 1         | 0         | 0         | 1         | 2         | 0         | 0         |
| 3.5.1.54 | 0         | 0         | 3         | 4         | 1         | 0         | 5         | 0         | 0         | 0         | 1         | 1         | 5         | 0         | 0         | 3         |
| 3.5.1.6  | 1         | 0         | 1         | 3         | 3         | 0         | 0         | 0         | 0         | 1         | 0         | 0         | 1         | 0         | 0         | 1         |
| 3.5.2.-  | 0         | 0         | 0         | 0         | 0         | 0         | 0         | 0         | 0         | 0         | 0         | 0         | 0         | 0         | 0         | 0         |
| 3.5.2.2  | 0         | 0         | 0         | 1         | 0         | 0         | 3         | 1         | 0         | 1         | 1         | 2         | 4         | 0         | 0         | 2         |
| 3.5.4.-  | 11        | 10        | 10        | 7         | 13        | 9         | 11        | 20        | 8         | 12        | 19        | 15        | 17        | 8         | 12        | 32        |
| 3.5.4.5  | 4         | 7         | 7         | 4         | 11        | 6         | 7         | 14        | 10        | 5         | 6         | 4         | 10        | 8         | 6         | 21        |
| 3.5.5.1  | 0         | 0         | 0         | 0         | 2         | 0         | 1         | 2         | 1         | 0         | 0         | 1         | 1         | 0         | 0         | 1         |
| 3.5.5.7  | 0         | 0         | 0         | 0         | 0         | 0         | 0         | 0         | 0         | 0         | 0         | 0         | 0         | 0         | 0         | 0         |
| 3.5.99.3 | 0         | 0         | 0         | 0         | 0         | 0         | 0         | 0         | 0         | 0         | 0         | 0         | 1         | 0         | 0         | 0         |
| 3.6.1.7  | 1         | 1         | 3         | 1         | 3         | 1         | 7         | 0         | 1         | 1         | 0         | 1         | 1         | 2         | 2         | 5         |
| 3.7.1.-  | 0         | 0         | 0         | 1         | 2         | 0         | 0         | 0         | 1         | 0         | 1         | 1         | 0         | 0         | 0         | 2         |
| 3.7.1.2  | 0         | 5         | 3         | 3         | 4         | 3         | 0         | 7         | 4         | 6         | 2         | 0         | 4         | 4         | 3         | 3         |
| 3.8.1.2  | 2         | 12        | 4         | 4         | 7         | 6         | 7         | 8         | 8         | 6         | 4         | 1         | 3         | 9         | 6         | 5         |
| 3.8.1.3  | 0         | 0         | 0         | 0         | 0         | 0         | 0         | 0         | 0         | 0         | 0         | 0         | 0         | 0         | 0         | 1         |
| 3.8.1.5  | 0         | 0         | 0         | 0         | 2         | 0         | 2         | 2         | 0         | 0         | 0         | 1         | 2         | 0         | 0         | 1         |
| 4.1.1.-  | 6         | 5         | 7         | 4         | 9         | 11        | 7         | 16        | 10        | 17        | 9         | 7         | 7         | 10        | 12        | 10        |
| 4.1.1.44 | 8         | 8         | 6         | 12        | 14        | 11        | 10        | 23        | 21        | 11        | 14        | 19        | 19        | 15        | 12        | 29        |
| 4.1.1.55 | 0         | 0         | 0         | 0         | 0         | 0         | 0         | 0         | 0         | 0         | 0         | 0         | 0         | 0         | 0         | 0         |
| 4.1.1.7  | 0         | 0         | 0         | 0         | 0         | 0         | 0         | 0         | 0         | 0         | 0         | 0         | 0         | 0         | 0         | 0         |
| 4.1.1.70 | 0         | 0         | 0         | 0         | 0         | 0         | 0         | 0         | 0         | 0         | 0         | 0         | 1         | 0         | 0         | 0         |
| 4.1.1.77 | 0         | 0         | 0         | 0         | 0         | 0         | 0         | 0         | 0         | 0         | 0         | 0         | 0         | 0         | 0         | 0         |
| 4.1.2.-  | 0         | 1         | 4         | 4         | 5         | 2         | 10        | 0         | 4         | 2         | 3         | 5         | 10        | 4         | 1         | 9         |
| 4.1.3.-  | 10        | 9         | 13        | 8         | 5         | 6         | 4         | 16        | 15        | 7         | 13        | 11        | 17        | 11        | 11        | 16        |



| EC/KO    | CH-DLM006 | CH-DLM007 | CH-DLM008 | CH-DLM009 | CH-DLM010 | CH-DLM011 | CH-DLM012 | CH-DLM014 | CH-DLM015 | CH-DLM016 | CH-DLM017 | CH-DLM018 | CH-DLM019 | CH-DLM020 | CH-DLM021 | CH-DLM022 |
|----------|-----------|-----------|-----------|-----------|-----------|-----------|-----------|-----------|-----------|-----------|-----------|-----------|-----------|-----------|-----------|-----------|
| 4.1.3.39 | 0         | 1         | 0         | 0         | 0         | 0         | 0         | 2         | 2         | 0         | 0         | 0         | 1         | 0         | 0         | 0         |
| 4.1.99.- | 1         | 0         | 1         | 1         | 1         | 0         | 0         | 1         | 0         | 0         | 0         | 0         | 0         | 0         | 0         | 4         |
| 4.2.1.-  | 29        | 27        | 25        | 18        | 28        | 29        | 25        | 63        | 40        | 38        | 30        | 20        | 38        | 46        | 33        | 60        |
| 4.2.1.17 | 3         | 4         | 4         | 3         | 7         | 7         | 4         | 3         | 5         | 2         | 2         | 5         | 3         | 1         | 5         | 7         |
| 4.2.1.80 | 0         | 0         | 0         | 1         | 0         | 0         | 0         | 0         | 1         | 0         | 0         | 0         | 0         | 0         | 0         | 0         |
| 4.2.1.83 | 0         | 0         | 0         | 0         | 0         | 0         | 0         | 0         | 1         | 0         | 0         | 0         | 0         | 0         | 1         | 0         |
| 4.2.1.84 | 0         | 0         | 1         | 0         | 0         | 0         | 0         | 0         | 1         | 0         | 0         | 0         | 0         | 0         | 0         | 0         |
| 5.1.2.2  | 0         | 0         | 0         | 0         | 0         | 0         | 0         | 0         | 0         | 0         | 0         | 0         | 0         | 0         | 0         | 0         |
| 5.2.1.2  | 0         | 0         | 0         | 0         | 0         | 0         | 0         | 0         | 0         | 0         | 0         | 0         | 0         | 0         | 0         | 0         |
| 5.3.3.4  | 0         | 0         | 0         | 0         | 1         | 0         | 0         | 0         | 0         | 0         | 0         | 0         | 0         | 0         | 0         | 0         |
| 5.3.99.- | 0         | 2         | 2         | 0         | 1         | 1         | 6         | 2         | 3         | 1         | 2         | 2         | 1         | 1         | 0         | 8         |
| 5.4.99.- | 1         | 0         | 0         | 0         | 0         | 0         | 0         | 1         | 0         | 1         | 1         | 0         | 1         | 0         | 1         | 0         |
| 5.5.1.1  | 1         | 3         | 1         | 1         | 3         | 1         | 0         | 6         | 5         | 4         | 3         | 2         | 7         | 8         | 6         | 6         |
| 5.5.1.2  | 0         | 0         | 0         | 0         | 1         | 0         | 0         | 0         | 0         | 0         | 0         | 0         | 0         | 0         | 0         | 0         |
| 6.2.1.-  | 0         | 0         | 0         | 0         | 0         | 0         | 0         | 0         | 0         | 0         | 0         | 0         | 0         | 0         | 0         | 0         |
| 6.3.5.2  | 15        | 11        | 11        | 7         | 13        | 9         | 10        | 24        | 18        | 14        | 16        | 17        | 19        | 14        | 14        | 26        |
| K00002   | 0         | 0         | 0         | 2         | 1         | 0         | 1         | 0         | 0         | 2         | 1         | 0         | 0         | 0         | 0         | 4         |
| K00055   | 0         | 0         | 0         | 1         | 1         | 0         | 0         | 0         | 0         | 0         | 0         | 0         | 0         | 0         | 0         | 0         |
| K00074   | 1         | 0         | 5         | 1         | 1         | 0         | 3         | 2         | 3         | 4         | 3         | 9         | 9         | 0         | 3         | 14        |
| K00088   | 14        | 13        | 13        | 11        | 10        | 12        | 10        | 21        | 18        | 15        | 12        | 13        | 21        | 20        | 13        | 29        |
| K00100   | 23        | 20        | 20        | 33        | 33        | 23        | 29        | 50        | 32        | 30        | 34        | 31        | 46        | 35        | 32        | 54        |
| K00128   | 2         | 0         | 0         | 2         | 1         | 0         | 5         | 0         | 2         | 0         | 0         | 2         | 2         | 1         | 1         | 3         |
| K00129   | 0         | 0         | 0         | 0         | 0         | 0         | 0         | 0         | 0         | 0         | 0         | 0         | 0         | 0         | 0         | 0         |
| K00132   | 0         | 0         | 0         | 0         | 0         | 0         | 0         | 0         | 0         | 0         | 0         | 0         | 2         | 0         | 0         | 2         |
| K00141   | 0         | 0         | 0         | 0         | 1         | 0         | 0         | 0         | 0         | 0         | 0         | 0         | 0         | 0         | 0         | 0         |
| K00146   | 0         | 0         | 0         | 0         | 2         | 0         | 1         | 0         | 0         | 0         | 0         | 0         | 0         | 0         | 0         | 0         |
| K00148   | 0         | 0         | 0         | 0         | 0         | 0         | 0         | 0         | 0         | 0         | 0         | 0         | 0         | 0         | 0         | 0         |
| K00155   | 0         | 0         | 0         | 2         | 0         | 0         | 0         | 0         | 0         | 0         | 0         | 0         | 0         | 0         | 0         | 1         |
| K00169   | 0         | 0         | 0         | 1         | 1         | 0         | 0         | 1         | 1         | 0         | 1         | 1         | 2         | 0         | 0         | 6         |
| K00224   | 0         | 0         | 0         | 1         | 0         | 0         | 0         | 0         | 0         | 0         | 0         | 0         | 0         | 0         | 0         | 0         |
| K00274   | 0         | 0         | 0         | 0         | 0         | 0         | 0         | 0         | 0         | 0         | 0         | 0         | 0         | 0         | 0         | 0         |
| K00446   | 0         | 0         | 0         | 0         | 0         | 0         | 0         | 0         | 0         | 0         | 0         | 0         | 0         | 0         | 0         | 0         |
| K00448   | 0         | 0         | 0         | 0         | 0         | 0         | 0         | 0         | 0         | 0         | 0         | 0         | 0         | 0         | 0         | 0         |
| K00462   | 1         | 1         | 0         | 2         | 1         | 0         | 0         | 0         | 1         | 0         | 0         | 2         | 0         | 0         | 0         | 0         |
| K00480   | 0         | 0         | 0         | 0         | 0         | 0         | 0         | 0         | 0         | 0         | 0         | 0         | 0         | 0         | 0         | 0         |
| K00481   | 0         | 0         | 0         | 0         | 1         | 0         | 0         | 0         | 0         | 0         | 0         | 0         | 0         | 0         | 0         | 0         |
| K00539   | 0         | 0         | 0         | 0         | 1         | 0         | 0         | 0         | 0         | 0         | 0         | 0         | 0         | 0         | 0         | 1         |
| K00599   | 33        | 23        | 27        | 20        | 26        | 13        | 19        | 40        | 37        | 32        | 20        | 28        | 31        | 21        | 26        | 46        |
| K00626   | 4         | 2         | 9         | 1         | 5         | 0         | 4         | 3         | 2         | 3         | 3         | 6         | 4         | 4         | 5         | 8         |
| K00632   | 0         | 0         | 0         | 0         | 0         | 0         | 1         | 0         | 0         | 0         | 0         | 0         | 0         | 0         | 0         | 0         |
| K00680   | 16        | 17        | 15        | 17        | 21        | 26        | 21        | 47        | 31        | 26        | 29        | 29        | 31        | 26        | 25        | 54        |
| K00757   | 9         | 7         | 5         | 1         | 9         | 7         | 3         | 19        | 9         | 13        | 3         | 5         | 6         | 6         | 9         | 8         |
| K00758   | 1         | 0         | 1         | 1         | 1         | 3         | 1         | 1         | 1         | 1         | 3         | 1         | 6         | 0         | 0         | 5         |
| K00760   | 12        | 9         | 18        | 8         | 12        | 8         | 9         | 15        | 10        | 13        | 14        | 13        | 26        | 10        | 12        | 38        |
| K00799   | 0         | 0         | 0         | 3         | 2         | 3         | 1         | 0         | 0         | 0         | 0         | 0         | 0         | 0         | 0         | 1         |
| K00857   | 7         | 6         | 6         | 6         | 10        | 8         | 3         | 18        | 7         | 8         | 10        | 7         | 17        | 7         | 7         | 11        |
| K00876   | 17        | 10        | 13        | 10        | 19        | 19        | 7         | 35        | 13        | 17        | 17        | 13        | 31        | 17        | 17        | 29        |
| K01026   | 0         | 0         | 1         | 0         | 2         | 0         | 0         | 1         | 1         | 0         | 1         | 3         | 0         | 0         | 1         | 0         |
| K01031   | 0         | 0         | 0         | 0         | 0         | 0         | 0         | 0         | 0         | 0         | 0         | 0         | 0         | 0         | 0         | 0         |

| EC/KO  | CH-DLM006 | CH-DLM007 | CH-DLM008 | CH-DLM009 | CH-DLM010 | CH-DLM011 | CH-DLM012 | CH-DLM014 | CH-DLM015 | CH-DLM016 | CH-DLM017 | CH-DLM018 | CH-DLM019 | CH-DLM020 | CH-DLM021 | CH-DLM022 |
|--------|-----------|-----------|-----------|-----------|-----------|-----------|-----------|-----------|-----------|-----------|-----------|-----------|-----------|-----------|-----------|-----------|
| K01034 | 0         | 1         | 0         | 1         | 0         | 0         | 0         | 1         | 1         | 0         | 1         | 1         | 3         | 0         | 1         | 2         |
| K01039 | 0         | 0         | 1         | 0         | 0         | 0         | 0         | 0         | 0         | 1         | 0         | 0         | 1         | 0         | 0         | 0         |
| K01041 | 7         | 6         | 4         | 1         | 4         | 9         | 2         | 17        | 5         | 10        | 5         | 7         | 3         | 8         | 7         | 7         |
| K01053 | 0         | 0         | 0         | 0         | 1         | 0         | 0         | 0         | 0         | 0         | 0         | 0         | 0         | 0         | 0         | 1         |
| K01055 | 0         | 0         | 0         | 0         | 0         | 0         | 0         | 0         | 0         | 0         | 0         | 0         | 0         | 0         | 0         | 0         |
| K01061 | 0         | 0         | 0         | 1         | 1         | 1         | 0         | 0         | 0         | 0         | 0         | 0         | 0         | 1         | 0         | 1         |
| K01066 | 0         | 2         | 5         | 3         | 3         | 6         | 4         | 7         | 6         | 5         | 6         | 7         | 5         | 5         | 4         | 4         |
| K01075 | 0         | 0         | 0         | 1         | 0         | 1         | 1         | 0         | 0         | 1         | 0         | 0         | 0         | 0         | 1         | 0         |
| K01077 | 3         | 6         | 7         | 4         | 10        | 11        | 2         | 17        | 8         | 11        | 8         | 6         | 5         | 17        | 12        | 13        |
| K01101 | 2         | 2         | 2         | 1         | 1         | 3         | 2         | 1         | 1         | 1         | 1         | 4         | 3         | 2         | 3         | 4         |
| K01195 | 6         | 3         | 2         | 4         | 7         | 5         | 1         | 9         | 6         | 2         | 7         | 5         | 7         | 8         | 6         | 3         |
| K01426 | 1         | 0         | 0         | 2         | 1         | 1         | 1         | 1         | 1         | 2         | 0         | 1         | 2         | 1         | 0         | 1         |
| K01428 | 0         | 0         | 0         | 2         | 1         | 0         | 1         | 0         | 0         | 0         | 1         | 0         | 1         | 1         | 0         | 1         |
| K01457 | 0         | 0         | 0         | 0         | 0         | 0         | 0         | 0         | 0         | 0         | 0         | 0         | 0         | 0         | 0         | 0         |
| K01464 | 0         | 0         | 1         | 2         | 1         | 0         | 4         | 1         | 0         | 1         | 1         | 3         | 7         | 0         | 0         | 3         |
| K01489 | 8         | 8         | 10        | 4         | 12        | 8         | 8         | 15        | 11        | 7         | 10        | 7         | 14        | 10        | 10        | 16        |
| K01500 | 0         | 0         | 0         | 0         | 0         | 0         | 0         | 0         | 0         | 0         | 0         | 0         | 0         | 0         | 0         | 0         |
| K01501 | 0         | 0         | 0         | 0         | 2         | 0         | 1         | 1         | 0         | 1         | 0         | 1         | 1         | 0         | 0         | 3         |
| K01502 | 0         | 0         | 0         | 0         | 0         | 0         | 0         | 0         | 0         | 0         | 0         | 0         | 0         | 0         | 0         | 0         |
| K01512 | 2         | 2         | 4         | 2         | 3         | 1         | 8         | 0         | 1         | 1         | 1         | 3         | 1         | 2         | 2         | 5         |
| K01560 | 1         | 2         | 1         | 0         | 3         | 2         | 0         | 1         | 0         | 3         | 2         | 6         | 4         | 0         | 3         | 4         |
| K01561 | 1         | 0         | 0         | 1         | 1         | 1         | 0         | 0         | 1         | 0         | 0         | 0         | 0         | 0         | 1         | 0         |
| K01563 | 0         | 0         | 0         | 0         | 0         | 0         | 0         | 0         | 0         | 0         | 0         | 0         | 0         | 0         | 0         | 0         |
| K01564 | 1         | 1         | 0         | 2         | 1         | 0         | 1         | 2         | 1         | 2         | 2         | 0         | 0         | 2         | 1         | 2         |
| K01607 | 5         | 6         | 4         | 2         | 7         | 7         | 7         | 17        | 11        | 9         | 9         | 7         | 7         | 10        | 7         | 17        |
| K01612 | 0         | 0         | 0         | 0         | 0         | 0         | 0         | 0         | 0         | 0         | 0         | 0         | 0         | 0         | 0         | 0         |
| K01615 | 8         | 5         | 9         | 5         | 10        | 16        | 3         | 27        | 8         | 15        | 11        | 8         | 25        | 13        | 13        | 20        |
| K01617 | 0         | 0         | 0         | 0         | 0         | 0         | 0         | 0         | 0         | 0         | 0         | 0         | 0         | 0         | 0         | 0         |
| K01666 | 4         | 2         | 5         | 1         | 0         | 1         | 1         | 5         | 4         | 1         | 2         | 4         | 6         | 1         | 0         | 3         |
| K01692 | 0         | 0         | 0         | 0         | 0         | 0         | 0         | 0         | 0         | 0         | 0         | 0         | 0         | 0         | 0         | 0         |
| K01721 | 0         | 0         | 0         | 0         | 0         | 0         | 0         | 0         | 0         | 0         | 0         | 0         | 0         | 0         | 0         | 0         |
| K01726 | 4         | 6         | 3         | 4         | 9         | 11        | 3         | 16        | 6         | 9         | 4         | 6         | 4         | 7         | 4         | 8         |
| K01781 | 0         | 0         | 0         | 0         | 0         | 1         | 0         | 0         | 0         | 0         | 0         | 0         | 0         | 0         | 0         | 0         |
| K01821 | 0         | 1         | 0         | 1         | 2         | 2         | 1         | 3         | 1         | 2         | 1         | 1         | 1         | 0         | 0         | 2         |
| K01856 | 0         | 0         | 0         | 0         | 0         | 0         | 0         | 0         | 0         | 0         | 0         | 0         | 0         | 0         | 0         | 0         |
| K01857 | 0         | 0         | 0         | 0         | 1         | 0         | 0         | 0         | 0         | 0         | 0         | 0         | 1         | 0         | 0         | 0         |
| K01913 | 0         | 1         | 0         | 0         | 0         | 0         | 0         | 0         | 0         | 0         | 0         | 1         | 0         | 0         | 0         | 0         |
| K01951 | 13        | 9         | 12        | 10        | 11        | 7         | 10        | 21        | 13        | 14        | 14        | 12        | 23        | 13        | 18        | 28        |
| K02554 | 0         | 0         | 0         | 1         | 0         | 0         | 0         | 0         | 1         | 0         | 0         | 0         | 0         | 0         | 0         | 0         |
| K03381 | 0         | 0         | 0         | 0         | 0         | 0         | 0         | 0         | 0         | 0         | 0         | 0         | 0         | 0         | 0         | 0         |
| K03382 | 0         | 0         | 0         | 0         | 1         | 0         | 0         | 0         | 0         | 0         | 0         | 1         | 4         | 0         | 0         | 2         |
| K03464 | 0         | 0         | 0         | 0         | 0         | 0         | 0         | 0         | 0         | 0         | 0         | 0         | 0         | 0         | 0         | 0         |
| K03518 | 3         | 2         | 5         | 6         | 6         | 2         | 8         | 3         | 1         | 4         | 5         | 8         | 13        | 2         | 5         | 10        |
| K03862 | 0         | 0         | 0         | 0         | 0         | 0         | 0         | 0         | 0         | 0         | 0         | 0         | 0         | 0         | 0         | 0         |
| K04099 | 0         | 0         | 0         | 0         | 1         | 0         | 0         | 0         | 0         | 0         | 0         | 0         | 0         | 0         | 0         | 0         |
| K04100 | 0         | 0         | 0         | 0         | 0         | 0         | 0         | 0         | 0         | 0         | 0         | 0         | 0         | 0         | 0         | 0         |
| K04102 | 0         | 0         | 0         | 0         | 0         | 0         | 0         | 0         | 0         | 0         | 0         | 0         | 0         | 0         | 0         | 0         |
| K04116 | 0         | 0         | 0         | 0         | 0         | 0         | 0         | 0         | 0         | 0         | 0         | 0         | 0         | 0         | 0         | 0         |
| K05394 | 0         | 0         | 0         | 0         | 0         | 0         | 0         | 0         | 1         | 0         | 0         | 0         | 0         | 0         | 0         | 1         |

| EC/KO  | CH-DLM006 | CH-DLM007 | CH-DLM008 | CH-DLM009 | CH-DLM010 | CH-DLM011 | CH-DLM012 | CH-DLM014 | CH-DLM015 | CH-DLM016 | CH-DLM017 | CH-DLM018 | CH-DLM019 | CH-DLM020 | CH-DLM021 | CH-DLM022 |
|--------|-----------|-----------|-----------|-----------|-----------|-----------|-----------|-----------|-----------|-----------|-----------|-----------|-----------|-----------|-----------|-----------|
| K05549 | 0         | 0         | 0         | 0         | 1         | 0         | 0         | 0         | 0         | 0         | 0         | 0         | 0         | 0         | 0         | 0         |
| K05783 | 0         | 0         | 0         | 0         | 0         | 0         | 0         | 0         | 0         | 0         | 0         | 0         | 0         | 0         | 0         | 0         |
| K05797 | 0         | 0         | 0         | 0         | 0         | 0         | 0         | 0         | 0         | 0         | 0         | 0         | 0         | 0         | 0         | 0         |
| K06281 | 0         | 0         | 0         | 4         | 0         | 2         | 2         | 1         | 2         | 1         | 2         | 1         | 0         | 1         | 0         | 5         |
| K06446 | 2         | 2         | 4         | 0         | 6         | 3         | 0         | 3         | 3         | 3         | 4         | 5         | 5         | 0         | 3         | 7         |
| K06912 | 0         | 0         | 0         | 0         | 0         | 0         | 0         | 0         | 0         | 0         | 0         | 0         | 0         | 0         | 0         | 0         |
| K07535 | 0         | 0         | 0         | 0         | 0         | 0         | 0         | 0         | 0         | 0         | 0         | 1         | 1         | 0         | 0         | 1         |
| K07536 | 4         | 2         | 2         | 4         | 2         | 0         | 3         | 6         | 1         | 1         | 3         | 0         | 2         | 2         | 1         | 0         |
| K08689 | 0         | 0         | 0         | 0         | 0         | 0         | 0         | 0         | 0         | 0         | 0         | 0         | 0         | 0         | 0         | 0         |
| K08710 | 0         | 0         | 0         | 0         | 0         | 0         | 1         | 0         | 0         | 0         | 0         | 0         | 0         | 0         | 0         | 0         |
| K09461 | 0         | 0         | 0         | 0         | 0         | 0         | 1         | 0         | 0         | 0         | 0         | 0         | 0         | 0         | 0         | 0         |
| K10217 | 0         | 0         | 0         | 0         | 0         | 0         | 0         | 0         | 0         | 0         | 0         | 0         | 0         | 0         | 0         | 0         |
| K10218 | 0         | 0         | 0         | 0         | 0         | 0         | 0         | 0         | 1         | 1         | 0         | 0         | 1         | 0         | 1         | 0         |
| K10220 | 0         | 0         | 0         | 0         | 0         | 0         | 0         | 0         | 0         | 0         | 0         | 0         | 0         | 0         | 0         | 0         |
| K11180 | 0         | 0         | 0         | 0         | 0         | 0         | 0         | 1         | 1         | 1         | 0         | 0         | 1         | 0         | 0         | 0         |
| K13953 | 0         | 0         | 0         | 0         | 0         | 0         | 2         | 0         | 0         | 0         | 0         | 0         | 0         | 0         | 0         | 1         |
| K14333 | 0         | 0         | 0         | 0         | 0         | 0         | 0         | 0         | 0         | 0         | 0         | 0         | 0         | 0         | 0         | 0         |
| K14519 | 0         | 0         | 0         | 0         | 1         | 0         | 0         | 0         | 0         | 0         | 0         | 0         | 0         | 0         | 0         | 0         |
| K15054 | 0         | 0         | 0         | 0         | 1         | 0         | 0         | 0         | 0         | 0         | 0         | 0         | 0         | 0         | 0         | 0         |
| K16173 | 0         | 0         | 1         | 0         | 0         | 0         | 0         | 1         | 0         | 0         | 0         | 1         | 1         | 0         | 1         | 0         |
| K16514 | 0         | 0         | 0         | 1         | 0         | 0         | 1         | 1         | 0         | 0         | 0         | 0         | 0         | 0         | 0         | 0         |
| K16874 | 0         | 0         | 0         | 0         | 0         | 0         | 0         | 0         | 0         | 0         | 0         | 0         | 0         | 0         | 0         | 0         |

| EC/KO      | CH-DLM023 | CH-DLM024 | CH-DLM027 | CH-DLM028 | CH-DOF002 | CH-DOF003 | CH-DOF004 | CH-DOF006 | CH-DOF007 | CH-DOF008 | CH-DOF009 | CH-DOF010 | CH-DOF011 | CH-DOF012 | CH-DOF013 | CH-DOF014 |
|------------|-----------|-----------|-----------|-----------|-----------|-----------|-----------|-----------|-----------|-----------|-----------|-----------|-----------|-----------|-----------|-----------|
| 1.1.1.-    | 40        | 26        | 40        | 38        | 20        | 54        | 60        | 43        | 35        | 37        | 33        | 36        | 13        | 36        | 30        | 26        |
| 1.1.1.1    | 36        | 22        | 37        | 35        | 11        | 38        | 29        | 34        | 17        | 41        | 23        | 19        | 7         | 28        | 13        | 28        |
| 1.1.1.157  | 1         | 0         | 0         | 0         | 0         | 0         | 1         | 0         | 0         | 2         | 1         | 1         | 0         | 1         | 0         | 0         |
| 1.1.1.205  | 22        | 9         | 16        | 14        | 8         | 22        | 18        | 16        | 9         | 26        | 13        | 6         | 8         | 14        | 10        | 15        |
| 1.1.1.35   | 1         | 1         | 0         | 4         | 1         | 1         | 1         | 0         | 0         | 6         | 0         | 1         | 0         | 1         | 1         | 0         |
| 1.12.99.6  | 0         | 1         | 1         | 3         | 2         | 1         | 4         | 5         | 2         | 0         | 0         | 2         | 1         | 2         | 2         | 0         |
| 1.13.11.-  | 0         | 0         | 0         | 0         | 0         | 0         | 0         | 0         | 0         | 0         | 0         | 0         | 0         | 0         | 0         | 0         |
| 1.13.11.1  | 0         | 0         | 0         | 0         | 0         | 0         | 0         | 0         | 0         | 0         | 0         | 0         | 0         | 0         | 0         | 0         |
| 1.13.11.2  | 0         | 0         | 0         | 0         | 0         | 0         | 0         | 0         | 0         | 0         | 0         | 0         | 0         | 0         | 0         | 0         |
| 1.13.11.3  | 0         | 0         | 0         | 1         | 0         | 0         | 0         | 0         | 0         | 0         | 0         | 0         | 0         | 0         | 0         | 0         |
| 1.13.11.39 | 0         | 0         | 0         | 0         | 0         | 0         | 0         | 0         | 0         | 0         | 0         | 0         | 0         | 0         | 0         | 0         |
| 1.13.11.5  | 0         | 0         | 0         | 0         | 0         | 0         | 0         | 0         | 0         | 0         | 0         | 0         | 0         | 0         | 0         | 0         |
| 1.13.11.8  | 0         | 0         | 0         | 1         | 0         | 0         | 0         | 0         | 0         | 0         | 0         | 0         | 0         | 0         | 0         | 0         |
| 1.14.12.10 | 0         | 1         | 0         | 2         | 0         | 0         | 1         | 1         | 0         | 0         | 1         | 1         | 0         | 1         | 0         | 0         |
| 1.14.12.13 | 0         | 0         | 0         | 0         | 0         | 0         | 0         | 0         | 0         | 0         | 0         | 0         | 0         | 0         | 0         | 0         |
| 1.14.12.18 | 0         | 0         | 0         | 0         | 0         | 0         | 0         | 0         | 0         | 0         | 0         | 0         | 0         | 0         | 0         | 0         |
| 1.14.13.-  | 0         | 1         | 0         | 11        | 0         | 0         | 3         | 3         | 0         | 2         | 0         | 2         | 0         | 0         | 0         | 0         |
| 1.14.13.1  | 0         | 0         | 0         | 0         | 0         | 0         | 0         | 0         | 0         | 0         | 0         | 0         | 0         | 0         | 0         | 0         |
| 1.14.13.2  | 0         | 0         | 0         | 1         | 0         | 0         | 0         | 0         | 0         | 0         | 0         | 0         | 0         | 0         | 0         | 0         |
| 1.14.13.50 | 0         | 0         | 0         | 0         | 0         | 0         | 0         | 0         | 0         | 0         | 0         | 0         | 0         | 0         | 0         | 0         |
| 1.14.13.7  | 0         | 0         | 0         | 0         | 0         | 0         | 0         | 1         | 0         | 0         | 0         | 0         | 0         | 0         | 0         | 0         |
| 1.14.13.8  | 0         | 0         | 0         | 0         | 0         | 0         | 0         | 0         | 0         | 0         | 0         | 0         | 0         | 0         | 0         | 0         |
| 1.14.13.82 | 0         | 0         | 0         | 2         | 0         | 0         | 0         | 0         | 0         | 0         | 0         | 0         | 0         | 0         | 0         | 0         |
| 1.14.99.-  | 0         | 0         | 0         | 0         | 0         | 0         | 1         | 0         | 0         | 0         | 0         | 0         | 0         | 0         | 0         | 0         |
| 1.17.99.1  | 0         | 0         | 0         | 0         | 0         | 0         | 0         | 0         | 0         | 0         | 0         | 0         | 0         | 0         | 0         | 0         |
| 1.18.6.1   | 0         | 0         | 0         | 1         | 0         | 0         | 0         | 0         | 0         | 0         | 0         | 0         | 0         | 0         | 0         | 0         |
| 1.2.1.-    | 0         | 1         | 0         | 5         | 0         | 0         | 2         | 0         | 0         | 0         | 0         | 2         | 0         | 2         | 0         | 0         |
| 1.2.1.10   | 2         | 3         | 7         | 4         | 2         | 5         | 7         | 5         | 1         | 11        | 3         | 2         | 1         | 8         | 2         | 6         |
| 1.2.1.3    | 5         | 5         | 5         | 12        | 4         | 6         | 12        | 9         | 5         | 17        | 2         | 9         | 1         | 8         | 3         | 3         |
| 1.2.1.39   | 0         | 0         | 0         | 1         | 0         | 0         | 0         | 1         | 0         | 0         | 0         | 1         | 0         | 0         | 0         | 0         |
| 1.2.7.1    | 7         | 1         | 2         | 6         | 6         | 7         | 7         | 7         | 4         | 5         | 7         | 3         | 3         | 1         | 6         | 2         |
| 1.2.99.2   | 6         | 6         | 2         | 3         | 0         | 3         | 5         | 7         | 1         | 10        | 0         | 5         | 0         | 4         | 0         | 0         |
| 1.3.1.-    | 1         | 0         | 0         | 0         | 0         | 0         | 2         | 0         | 0         | 0         | 0         | 0         | 1         | 0         | 0         | 1         |
| 1.3.1.2    | 0         | 0         | 1         | 1         | 1         | 1         | 2         | 2         | 1         | 1         | 0         | 0         | 0         | 2         | 0         | 0         |
| 1.3.1.25   | 0         | 0         | 0         | 1         | 0         | 0         | 0         | 0         | 0         | 0         | 0         | 0         | 0         | 0         | 0         | 0         |
| 1.3.99.-   | 0         | 1         | 0         | 0         | 0         | 0         | 2         | 1         | 1         | 0         | 0         | 0         | 0         | 0         | 0         | 0         |
| 1.6.5.-    | 40        | 7         | 15        | 34        | 21        | 52        | 32        | 19        | 23        | 21        | 31        | 16        | 16        | 11        | 25        | 14        |
| 1.7.1.-    | 4         | 1         | 5         | 7         | 2         | 11        | 7         | 2         | 6         | 8         | 12        | 7         | 5         | 5         | 8         | 6         |
| 1.8.99.3   | 0         | 0         | 0         | 0         | 0         | 0         | 0         | 1         | 0         | 1         | 0         | 0         | 0         | 0         | 0         | 0         |
| 2.1.1.-    | 204       | 75        | 139       | 223       | 117       | 212       | 183       | 128       | 89        | 216       | 130       | 98        | 58        | 121       | 95        | 113       |
| 2.3.1.-    | 107       | 56        | 63        | 129       | 65        | 166       | 99        | 106       | 71        | 101       | 98        | 69        | 31        | 71        | 85        | 72        |
| 2.3.1.16   | 3         | 0         | 2         | 4         | 1         | 1         | 2         | 2         | 0         | 1         | 0         | 1         | 0         | 1         | 1         | 1         |
| 2.3.1.5    | 0         | 0         | 0         | 2         | 0         | 0         | 1         | 0         | 0         | 1         | 0         | 1         | 0         | 1         | 0         | 0         |
| 2.3.1.9    | 0         | 2         | 2         | 9         | 0         | 0         | 3         | 2         | 0         | 2         | 0         | 3         | 0         | 6         | 0         | 0         |
| 2.4.2.10   | 12        | 5         | 8         | 15        | 1         | 9         | 10        | 8         | 3         | 12        | 6         | 5         | 2         | 6         | 6         | 7         |
| 2.4.2.3    | 4         | 7         | 7         | 9         | 2         | 5         | 7         | 3         | 3         | 9         | 3         | 1         | 3         | 7         | 2         | 5         |
| 2.4.2.4    | 3         | 1         | 0         | 4         | 2         | 4         | 1         | 1         | 0         | 4         | 2         | 0         | 1         | 0         | 1         | 0         |
| 2.4.2.8    | 8         | 5         | 9         | 8         | 5         | 12        | 9         | 10        | 5         | 16        | 9         | 6         | 3         | 14        | 7         | 2         |
| 2.5.1.-    | 14        | 3         | 14        | 14        | 8         | 20        | 17        | 13        | 10        | 15        | 19        | 7         | 8         | 19        | 13        | 12        |

| EC/KO    | CH-DLM023 | CH-DLM024 | CH-DLM027 | CH-DLM028 | CH-DOF002 | CH-DOF003 | CH-DOF004 | CH-DOF006 | CH-DOF007 | CH-DOF008 | CH-DOF009 | CH-DOF010 | CH-DOF011 | CH-DOF012 | CH-DOF013 | CH-DOF014 |
|----------|-----------|-----------|-----------|-----------|-----------|-----------|-----------|-----------|-----------|-----------|-----------|-----------|-----------|-----------|-----------|-----------|
| 2.5.1.18 | 1         | 3         | 2         | 8         | 0         | 0         | 3         | 3         | 5         | 7         | 0         | 5         | 0         | 5         | 0         | 0         |
| 2.6.1.-  | 21        | 10        | 20        | 33        | 18        | 29        | 28        | 19        | 15        | 25        | 16        | 18        | 7         | 24        | 22        | 14        |
| 2.7.1.21 | 5         | 1         | 4         | 7         | 7         | 4         | 4         | 3         | 3         | 6         | 4         | 1         | 2         | 9         | 6         | 3         |
| 2.7.1.48 | 21        | 9         | 12        | 17        | 12        | 26        | 20        | 17        | 9         | 18        | 18        | 13        | 7         | 12        | 11        | 11        |
| 2.7.4.-  | 12        | 1         | 6         | 11        | 6         | 16        | 10        | 6         | 3         | 9         | 10        | 6         | 5         | 6         | 8         | 7         |
| 2.8.3.-  | 1         | 0         | 2         | 2         | 3         | 3         | 3         | 0         | 3         | 0         | 0         | 5         | 1         | 2         | 3         | 0         |
| 2.8.3.1  | 0         | 2         | 0         | 0         | 0         | 0         | 0         | 0         | 1         | 0         | 2         | 0         | 0         | 0         | 0         | 0         |
| 2.8.3.12 | 1         | 0         | 0         | 0         | 0         | 1         | 0         | 1         | 0         | 0         | 0         | 1         | 0         | 0         | 0         | 1         |
| 2.8.3.6  | 0         | 0         | 0         | 1         | 1         | 0         | 0         | 0         | 0         | 0         | 0         | 1         | 0         | 0         | 0         | 0         |
| 2.8.3.8  | 1         | 3         | 0         | 1         | 0         | 1         | 2         | 3         | 3         | 5         | 2         | 1         | 0         | 1         | 0         | 0         |
| 3.1.1.-  | 5         | 5         | 5         | 5         | 3         | 12        | 7         | 7         | 6         | 4         | 3         | 5         | 2         | 6         | 1         | 3         |
| 3.1.1.1  | 3         | 2         | 4         | 2         | 4         | 9         | 2         | 6         | 5         | 8         | 8         | 7         | 2         | 5         | 6         | 5         |
| 3.1.1.17 | 3         | 0         | 1         | 3         | 3         | 4         | 2         | 2         | 1         | 0         | 1         | 1         | 0         | 1         | 3         | 1         |
| 3.1.1.2  | 1         | 1         | 1         | 2         | 0         | 0         | 2         | 1         | 1         | 2         | 0         | 0         | 1         | 4         | 0         | 0         |
| 3.1.1.24 | 3         | 1         | 1         | 6         | 1         | 2         | 3         | 1         | 1         | 5         | 1         | 2         | 0         | 1         | 1         | 0         |
| 3.1.1.45 | 0         | 0         | 0         | 0         | 0         | 0         | 0         | 0         | 0         | 1         | 0         | 1         | 0         | 1         | 0         | 0         |
| 3.1.2.-  | 0         | 1         | 2         | 2         | 2         | 0         | 2         | 2         | 0         | 3         | 2         | 2         | 0         | 2         | 0         | 1         |
| 3.1.2.23 | 1         | 0         | 1         | 2         | 2         | 5         | 3         | 1         | 3         | 0         | 6         | 3         | 2         | 1         | 3         | 2         |
| 3.1.3.1  | 12        | 3         | 11        | 9         | 5         | 24        | 21        | 14        | 15        | 3         | 14        | 8         | 7         | 9         | 9         | 11        |
| 3.1.3.2  | 4         | 1         | 2         | 6         | 2         | 5         | 8         | 8         | 6         | 2         | 7         | 2         | 5         | 3         | 5         | 4         |
| 3.1.3.41 | 0         | 0         | 0         | 0         | 0         | 0         | 0         | 0         | 0         | 0         | 1         | 0         | 0         | 0         | 0         | 0         |
| 3.2.1.31 | 4         | 3         | 1         | 3         | 1         | 3         | 4         | 1         | 1         | 1         | 1         | 1         | 0         | 2         | 2         | 2         |
| 3.3.2.9  | 0         | 0         | 0         | 0         | 0         | 0         | 0         | 0         | 0         | 0         | 0         | 0         | 0         | 0         | 0         | 0         |
| 3.5.1.-  | 18        | 9         | 9         | 12        | 9         | 15        | 14        | 7         | 3         | 28        | 9         | 9         | 2         | 8         | 4         | 3         |
| 3.5.1.4  | 2         | 4         | 1         | 2         | 1         | 2         | 1         | 1         | 1         | 1         | 1         | 2         | 1         | 2         | 2         | 0         |
| 3.5.1.5  | 0         | 0         | 0         | 1         | 0         | 0         | 2         | 2         | 0         | 2         | 0         | 0         | 0         | 0         | 0         | 1         |
| 3.5.1.54 | 3         | 3         | 0         | 5         | 0         | 1         | 3         | 2         | 0         | 2         | 0         | 3         | 0         | 5         | 0         | 1         |
| 3.5.1.6  | 3         | 0         | 0         | 1         | 0         | 1         | 1         | 0         | 1         | 0         | 0         | 0         | 0         | 0         | 2         | 0         |
| 3.5.2.-  | 0         | 0         | 0         | 0         | 0         | 0         | 0         | 0         | 0         | 0         | 0         | 0         | 0         | 0         | 0         | 0         |
| 3.5.2.2  | 1         | 3         | 2         | 1         | 0         | 0         | 0         | 4         | 0         | 4         | 0         | 1         | 0         | 2         | 0         | 0         |
| 3.5.4.-  | 14        | 4         | 8         | 16        | 11        | 15        | 11        | 10        | 9         | 15        | 15        | 7         | 10        | 10        | 13        | 14        |
| 3.5.4.5  | 9         | 1         | 3         | 7         | 7         | 14        | 12        | 5         | 6         | 9         | 6         | 2         | 3         | 4         | 9         | 6         |
| 3.5.5.1  | 1         | 1         | 1         | 0         | 1         | 2         | 1         | 1         | 0         | 0         | 0         | 1         | 0         | 0         | 1         | 1         |
| 3.5.5.7  | 0         | 0         | 0         | 0         | 0         | 0         | 0         | 0         | 0         | 0         | 0         | 0         | 0         | 0         | 0         | 0         |
| 3.5.99.3 | 0         | 2         | 0         | 0         | 0         | 0         | 0         | 0         | 0         | 0         | 0         | 0         | 0         | 0         | 0         | 0         |
| 3.6.1.7  | 4         | 2         | 2         | 4         | 0         | 4         | 5         | 1         | 0         | 6         | 2         | 2         | 1         | 4         | 1         | 1         |
| 3.7.1.-  | 3         | 2         | 0         | 2         | 0         | 2         | 0         | 1         | 0         | 5         | 0         | 0         | 1         | 0         | 0         | 2         |
| 3.7.1.2  | 4         | 0         | 0         | 5         | 4         | 4         | 3         | 2         | 4         | 1         | 4         | 4         | 1         | 3         | 4         | 2         |
| 3.8.1.2  | 5         | 1         | 3         | 5         | 3         | 6         | 8         | 5         | 5         | 5         | 4         | 6         | 3         | 4         | 1         | 6         |
| 3.8.1.3  | 0         | 0         | 0         | 0         | 0         | 0         | 0         | 0         | 0         | 0         | 0         | 0         | 0         | 0         | 0         | 0         |
| 3.8.1.5  | 0         | 1         | 3         | 2         | 0         | 0         | 0         | 1         | 0         | 3         | 0         | 0         | 0         | 3         | 0         | 1         |
| 4.1.1.-  | 9         | 7         | 4         | 14        | 6         | 14        | 12        | 11        | 10        | 13        | 7         | 10        | 4         | 8         | 10        | 3         |
| 4.1.1.44 | 19        | 1         | 9         | 9         | 12        | 18        | 11        | 13        | 12        | 11        | 17        | 10        | 5         | 13        | 15        | 9         |
| 4.1.1.55 | 0         | 0         | 0         | 0         | 0         | 0         | 0         | 0         | 0         | 0         | 0         | 0         | 0         | 0         | 0         | 0         |
| 4.1.1.7  | 0         | 0         | 0         | 0         | 0         | 0         | 0         | 0         | 0         | 0         | 0         | 0         | 0         | 0         | 0         | 0         |
| 4.1.1.70 | 0         | 1         | 0         | 1         | 0         | 0         | 0         | 0         | 0         | 0         | 0         | 0         | 0         | 0         | 0         | 0         |
| 4.1.1.77 | 0         | 0         | 0         | 0         | 0         | 0         | 0         | 0         | 0         | 0         | 0         | 0         | 0         | 0         | 0         | 0         |
| 4.1.2.-  | 7         | 5         | 1         | 4         | 1         | 5         | 7         | 15        | 3         | 10        | 4         | 2         | 2         | 7         | 2         | 1         |
| 4.1.3.-  | 15        | 4         | 8         | 18        | 3         | 18        | 14        | 11        | 4         | 9         | 9         | 3         | 2         | 6         | 12        | 8         |

| EC/KO    | CH-DLM023 | CH-DLM024 | CH-DLM027 | CH-DLM028 | CH-DOF002 | CH-DOF003 | CH-DOF004 | CH-DOF006 | CH-DOF007 | CH-DOF008 | CH-DOF009 | CH-DOF010 | CH-DOF011 | CH-DOF012 | CH-DOF013 | CH-DOF014 |
|----------|-----------|-----------|-----------|-----------|-----------|-----------|-----------|-----------|-----------|-----------|-----------|-----------|-----------|-----------|-----------|-----------|
| 4.1.3.39 | 1         | 1         | 0         | 0         | 0         | 1         | 0         | 1         | 0         | 0         | 0         | 1         | 1         | 1         | 0         | 1         |
| 4.1.99.- | 1         | 3         | 0         | 0         | 1         | 1         | 2         | 1         | 0         | 1         | 0         | 0         | 0         | 0         | 0         | 0         |
| 4.2.1.-  | 46        | 18        | 19        | 36        | 18        | 53        | 42        | 34        | 33        | 27        | 31        | 22        | 10        | 22        | 32        | 27        |
| 4.2.1.17 | 4         | 1         | 3         | 8         | 1         | 5         | 6         | 1         | 3         | 3         | 1         | 3         | 0         | 3         | 1         | 5         |
| 4.2.1.80 | 0         | 0         | 0         | 0         | 0         | 0         | 0         | 1         | 1         | 0         | 0         | 0         | 0         | 0         | 0         | 0         |
| 4.2.1.83 | 0         | 0         | 0         | 1         | 0         | 0         | 0         | 0         | 0         | 0         | 0         | 0         | 0         | 0         | 0         | 0         |
| 4.2.1.84 | 0         | 0         | 0         | 1         | 0         | 0         | 0         | 0         | 0         | 0         | 0         | 1         | 0         | 0         | 0         | 1         |
| 5.1.2.2  | 0         | 0         | 0         | 0         | 0         | 0         | 0         | 0         | 0         | 0         | 0         | 0         | 0         | 0         | 0         | 0         |
| 5.2.1.2  | 0         | 0         | 0         | 0         | 0         | 0         | 0         | 0         | 0         | 0         | 0         | 0         | 0         | 0         | 0         | 0         |
| 5.3.3.4  | 0         | 0         | 0         | 1         | 0         | 0         | 0         | 0         | 0         | 0         | 0         | 0         | 0         | 0         | 0         | 0         |
| 5.3.99.- | 4         | 6         | 2         | 1         | 0         | 4         | 3         | 2         | 0         | 2         | 1         | 2         | 1         | 2         | 1         | 0         |
| 5.4.99.- | 0         | 0         | 0         | 0         | 1         | 1         | 0         | 1         | 0         | 0         | 2         | 0         | 0         | 0         | 1         | 0         |
| 5.5.1.1  | 4         | 1         | 3         | 4         | 2         | 5         | 4         | 4         | 3         | 2         | 4         | 1         | 2         | 0         | 4         | 2         |
| 5.5.1.2  | 0         | 0         | 0         | 0         | 0         | 0         | 0         | 0         | 0         | 0         | 0         | 0         | 0         | 0         | 0         | 0         |
| 6.2.1.-  | 0         | 0         | 0         | 1         | 0         | 0         | 0         | 0         | 0         | 0         | 0         | 0         | 0         | 0         | 0         | 0         |
| 6.3.5.2  | 21        | 11        | 15        | 16        | 10        | 29        | 17        | 12        | 8         | 20        | 12        | 12        | 4         | 10        | 13        | 10        |
| K00002   | 0         | 1         | 0         | 1         | 0         | 1         | 1         | 0         | 0         | 3         | 1         | 0         | 0         | 2         | 0         | 0         |
| K00055   | 0         | 1         | 0         | 0         | 0         | 0         | 0         | 0         | 0         | 0         | 0         | 0         | 0         | 0         | 0         | 0         |
| K00074   | 3         | 1         | 2         | 3         | 3         | 3         | 3         | 1         | 0         | 9         | 5         | 3         | 0         | 3         | 1         | 1         |
| K00088   | 17        | 8         | 13        | 14        | 7         | 21        | 19        | 12        | 12        | 19        | 9         | 8         | 6         | 16        | 8         | 11        |
| K00100   | 42        | 26        | 33        | 44        | 22        | 45        | 42        | 36        | 27        | 33        | 31        | 17        | 15        | 41        | 24        | 22        |
| K00128   | 0         | 1         | 0         | 4         | 0         | 2         | 3         | 0         | 0         | 4         | 0         | 2         | 0         | 6         | 1         | 2         |
| K00129   | 0         | 0         | 0         | 0         | 0         | 0         | 0         | 0         | 0         | 0         | 0         | 0         | 0         | 0         | 0         | 0         |
| K00132   | 0         | 1         | 0         | 1         | 0         | 0         | 0         | 0         | 0         | 0         | 0         | 0         | 0         | 1         | 0         | 0         |
| K00141   | 0         | 0         | 0         | 0         | 0         | 0         | 0         | 0         | 0         | 0         | 0         | 0         | 0         | 0         | 0         | 0         |
| K00146   | 0         | 0         | 0         | 2         | 0         | 0         | 0         | 0         | 0         | 0         | 0         | 1         | 0         | 0         | 0         | 0         |
| K00148   | 0         | 0         | 0         | 0         | 0         | 0         | 0         | 0         | 0         | 0         | 0         | 0         | 0         | 0         | 0         | 0         |
| K00155   | 0         | 1         | 0         | 1         | 0         | 1         | 2         | 0         | 0         | 0         | 0         | 1         | 0         | 1         | 0         | 0         |
| K00169   | 0         | 0         | 1         | 0         | 0         | 0         | 2         | 0         | 0         | 0         | 0         | 0         | 0         | 0         | 0         | 0         |
| K00224   | 0         | 0         | 1         | 0         | 0         | 1         | 1         | 0         | 0         | 0         | 0         | 0         | 0         | 0         | 0         | 0         |
| K00274   | 0         | 0         | 0         | 0         | 0         | 0         | 0         | 0         | 0         | 0         | 0         | 0         | 0         | 0         | 0         | 0         |
| K00446   | 0         | 0         | 0         | 0         | 0         | 0         | 0         | 0         | 0         | 0         | 0         | 0         | 0         | 0         | 0         | 0         |
| K00448   | 0         | 0         | 0         | 0         | 0         | 0         | 0         | 0         | 0         | 0         | 0         | 0         | 0         | 0         | 0         | 0         |
| K00462   | 1         | 0         | 1         | 0         | 0         | 2         | 0         | 2         | 1         | 0         | 0         | 0         | 0         | 0         | 0         | 1         |
| K00480   | 0         | 0         | 0         | 0         | 0         | 0         | 0         | 0         | 0         | 0         | 0         | 0         | 0         | 0         | 0         | 0         |
| K00481   | 0         | 0         | 0         | 1         | 0         | 0         | 0         | 0         | 0         | 0         | 0         | 0         | 0         | 0         | 0         | 0         |
| K00539   | 1         | 0         | 0         | 0         | 0         | 2         | 1         | 0         | 0         | 0         | 0         | 0         | 0         | 0         | 0         | 0         |
| K00599   | 42        | 13        | 32        | 35        | 10        | 33        | 23        | 13        | 9         | 40        | 26        | 17        | 7         | 17        | 19        | 18        |
| K00626   | 5         | 1         | 5         | 15        | 2         | 3         | 4         | 3         | 0         | 4         | 3         | 3         | 1         | 5         | 1         | 1         |
| K00632   | 0         | 1         | 0         | 1         | 0         | 0         | 1         | 1         | 0         | 0         | 0         | 0         | 0         | 1         | 0         | 0         |
| K00680   | 34        | 9         | 18        | 27        | 12        | 41        | 29        | 32        | 25        | 20        | 17        | 19        | 9         | 22        | 26        | 18        |
| K00757   | 8         | 7         | 7         | 6         | 5         | 12        | 8         | 6         | 9         | 6         | 9         | 4         | 3         | 4         | 6         | 4         |
| K00758   | 2         | 3         | 2         | 4         | 0         | 2         | 4         | 1         | 1         | 1         | 1         | 1         | 0         | 2         | 0         | 0         |
| K00760   | 14        | 5         | 14        | 15        | 7         | 14        | 13        | 8         | 7         | 18        | 13        | 6         | 2         | 16        | 7         | 5         |
| K00799   | 0         | 1         | 0         | 4         | 0         | 0         | 1         | 0         | 1         | 4         | 0         | 2         | 0         | 1         | 0         | 0         |
| K00857   | 6         | 1         | 6         | 11        | 10        | 6         | 9         | 3         | 3         | 8         | 7         | 2         | 3         | 9         | 7         | 4         |
| K00876   | 25        | 8         | 17        | 21        | 13        | 24        | 22        | 15        | 9         | 21        | 16        | 10        | 8         | 12        | 13        | 7         |
| K01026   | 0         | 3         | 3         | 0         | 0         | 0         | 0         | 1         | 0         | 2         | 1         | 0         | 0         | 0         | 0         | 0         |
| K01031   | 0         | 0         | 0         | 0         | 0         | 0         | 0         | 0         | 0         | 0         | 0         | 0         | 0         | 0         | 0         | 0         |

| EC/KO  | CH-DLM023 | CH-DLM024 | CH-DLM027 | CH-DLM028 | CH-DOF002 | CH-DOF003 | CH-DOF004 | CH-DOF006 | CH-DOF007 | CH-DOF008 | CH-DOF009 | CH-DOF010 | CH-DOF011 | CH-DOF012 | CH-DOF013 | CH-DOF014 |
|--------|-----------|-----------|-----------|-----------|-----------|-----------|-----------|-----------|-----------|-----------|-----------|-----------|-----------|-----------|-----------|-----------|
| K01034 | 0         | 1         | 0         | 0         | 1         | 0         | 1         | 2         | 0         | 0         | 1         | 0         | 0         | 0         | 0         | 0         |
| K01039 | 1         | 0         | 0         | 1         | 1         | 1         | 0         | 0         | 0         | 0         | 0         | 1         | 0         | 0         | 0         | 0         |
| K01041 | 4         | 1         | 5         | 5         | 4         | 6         | 9         | 6         | 6         | 2         | 7         | 6         | 4         | 2         | 7         | 6         |
| K01053 | 0         | 0         | 0         | 0         | 0         | 0         | 0         | 0         | 0         | 0         | 0         | 0         | 0         | 0         | 0         | 0         |
| K01055 | 0         | 0         | 0         | 0         | 0         | 0         | 0         | 0         | 0         | 0         | 0         | 0         | 0         | 0         | 0         | 0         |
| K01061 | 0         | 0         | 0         | 0         | 0         | 0         | 0         | 0         | 1         | 1         | 0         | 1         | 0         | 1         | 0         | 0         |
| K01066 | 1         | 6         | 2         | 5         | 1         | 7         | 2         | 4         | 4         | 9         | 7         | 5         | 1         | 5         | 3         | 3         |
| K01075 | 0         | 1         | 1         | 1         | 0         | 1         | 3         | 2         | 1         | 1         | 0         | 1         | 0         | 1         | 0         | 0         |
| K01077 | 9         | 2         | 7         | 7         | 3         | 10        | 15        | 8         | 8         | 4         | 10        | 6         | 3         | 6         | 4         | 8         |
| K01101 | 4         | 4         | 3         | 3         | 2         | 2         | 1         | 0         | 3         | 2         | 1         | 3         | 0         | 2         | 1         | 1         |
| K01195 | 7         | 5         | 2         | 10        | 1         | 9         | 8         | 6         | 3         | 4         | 4         | 6         | 0         | 5         | 6         | 4         |
| K01426 | 1         | 3         | 1         | 1         | 0         | 1         | 1         | 2         | 1         | 0         | 0         | 1         | 0         | 1         | 1         | 1         |
| K01428 | 2         | 0         | 0         | 0         | 0         | 0         | 1         | 0         | 0         | 2         | 0         | 1         | 0         | 0         | 0         | 1         |
| K01457 | 0         | 0         | 0         | 1         | 0         | 0         | 0         | 0         | 0         | 0         | 0         | 0         | 0         | 0         | 0         | 0         |
| K01464 | 1         | 7         | 3         | 2         | 0         | 0         | 1         | 8         | 0         | 5         | 2         | 2         | 0         | 2         | 0         | 0         |
| K01489 | 15        | 2         | 6         | 16        | 9         | 16        | 13        | 6         | 6         | 12        | 8         | 3         | 5         | 4         | 9         | 8         |
| K01500 | 0         | 0         | 0         | 0         | 0         | 0         | 0         | 0         | 0         | 0         | 0         | 0         | 0         | 0         | 0         | 0         |
| K01501 | 4         | 3         | 1         | 0         | 0         | 2         | 2         | 1         | 0         | 0         | 1         | 2         | 0         | 0         | 0         | 1         |
| K01502 | 0         | 0         | 0         | 0         | 0         | 0         | 0         | 0         | 0         | 0         | 0         | 0         | 0         | 0         | 0         | 0         |
| K01512 | 8         | 3         | 3         | 7         | 3         | 4         | 5         | 1         | 0         | 7         | 4         | 3         | 1         | 8         | 1         | 2         |
| K01560 | 4         | 1         | 4         | 3         | 0         | 4         | 7         | 2         | 0         | 7         | 3         | 0         | 0         | 0         | 1         | 2         |
| K01561 | 1         | 0         | 1         | 0         | 1         | 1         | 1         | 0         | 1         | 0         | 0         | 1         | 0         | 0         | 1         | 0         |
| K01563 | 0         | 0         | 0         | 0         | 0         | 0         | 0         | 0         | 0         | 0         | 0         | 0         | 0         | 0         | 0         | 0         |
| K01564 | 2         | 0         | 1         | 1         | 1         | 4         | 1         | 0         | 2         | 0         | 1         | 2         | 0         | 0         | 1         | 0         |
| K01607 | 8         | 3         | 3         | 11        | 8         | 7         | 6         | 8         | 7         | 3         | 8         | 3         | 3         | 3         | 5         | 4         |
| K01612 | 0         | 0         | 0         | 0         | 0         | 0         | 0         | 0         | 0         | 0         | 0         | 0         | 0         | 0         | 0         | 0         |
| K01615 | 13        | 6         | 7         | 14        | 5         | 16        | 14        | 5         | 8         | 9         | 15        | 4         | 2         | 6         | 11        | 8         |
| K01617 | 0         | 0         | 0         | 0         | 0         | 0         | 0         | 0         | 0         | 0         | 0         | 0         | 0         | 0         | 0         | 0         |
| K01666 | 4         | 1         | 2         | 4         | 1         | 5         | 4         | 1         | 0         | 2         | 0         | 1         | 1         | 1         | 2         | 4         |
| K01692 | 0         | 0         | 0         | 1         | 0         | 1         | 1         | 0         | 0         | 0         | 0         | 0         | 0         | 0         | 0         | 0         |
| K01721 | 0         | 0         | 0         | 0         | 0         | 0         | 0         | 0         | 0         | 0         | 0         | 0         | 0         | 0         | 0         | 0         |
| K01726 | 9         | 2         | 5         | 3         | 1         | 10        | 6         | 4         | 5         | 3         | 6         | 2         | 3         | 5         | 8         | 3         |
| K01781 | 0         | 1         | 0         | 0         | 0         | 0         | 2         | 1         | 0         | 0         | 0         | 0         | 0         | 0         | 0         | 0         |
| K01821 | 0         | 0         | 3         | 3         | 2         | 1         | 1         | 1         | 0         | 2         | 0         | 3         | 0         | 3         | 2         | 0         |
| K01856 | 0         | 0         | 0         | 0         | 0         | 0         | 0         | 0         | 0         | 0         | 0         | 0         | 0         | 0         | 0         | 0         |
| K01857 | 0         | 0         | 2         | 0         | 0         | 0         | 0         | 1         | 0         | 0         | 0         | 0         | 0         | 1         | 0         | 0         |
| K01913 | 0         | 0         | 0         | 0         | 0         | 0         | 0         | 0         | 0         | 0         | 0         | 0         | 0         | 0         | 0         | 0         |
| K01951 | 19        | 8         | 12        | 18        | 7         | 21        | 12        | 15        | 8         | 19        | 10        | 8         | 3         | 8         | 9         | 8         |
| K02554 | 0         | 0         | 0         | 1         | 0         | 0         | 0         | 0         | 1         | 0         | 0         | 0         | 0         | 0         | 0         | 0         |
| K03381 | 0         | 0         | 0         | 0         | 0         | 0         | 0         | 0         | 0         | 0         | 0         | 0         | 0         | 0         | 0         | 0         |
| K03382 | 0         | 3         | 0         | 1         | 0         | 0         | 0         | 0         | 0         | 0         | 1         | 0         | 0         | 0         | 0         | 0         |
| K03464 | 0         | 0         | 0         | 0         | 0         | 0         | 0         | 0         | 0         | 0         | 0         | 0         | 0         | 0         | 0         | 0         |
| K03518 | 7         | 15        | 9         | 7         | 1         | 5         | 10        | 8         | 0         | 11        | 4         | 2         | 2         | 9         | 1         | 3         |
| K03862 | 0         | 0         | 0         | 1         | 0         | 0         | 0         | 0         | 0         | 0         | 0         | 0         | 0         | 0         | 0         | 0         |
| K04099 | 0         | 0         | 0         | 1         | 0         | 0         | 0         | 0         | 0         | 0         | 0         | 0         | 0         | 0         | 0         | 0         |
| K04100 | 0         | 0         | 0         | 0         | 0         | 0         | 0         | 0         | 0         | 0         | 0         | 0         | 0         | 0         | 0         | 0         |
| K04102 | 0         | 0         | 0         | 0         | 0         | 0         | 0         | 0         | 0         | 0         | 0         | 0         | 0         | 0         | 0         | 0         |
| K04116 | 0         | 0         | 0         | 0         | 0         | 0         | 0         | 0         | 0         | 0         | 0         | 0         | 0         | 0         | 0         | 0         |
| K05394 | 0         | 0         | 1         | 0         | 0         | 0         | 0         | 0         | 0         | 0         | 0         | 0         | 0         | 0         | 1         | 0         |

| EC/KO  | CH-DLM023 | CH-DLM024 | CH-DLM027 | CH-DLM028 | CH-DOF002 | CH-DOF003 | CH-DOF004 | CH-DOF006 | CH-DOF007 | CH-DOF008 | CH-DOF009 | CH-DOF010 | CH-DOF011 | CH-DOF012 | CH-DOF013 | CH-DOF014 |
|--------|-----------|-----------|-----------|-----------|-----------|-----------|-----------|-----------|-----------|-----------|-----------|-----------|-----------|-----------|-----------|-----------|
| K05549 | 0         | 0         | 0         | 1         | 0         | 0         | 0         | 0         | 0         | 0         | 0         | 0         | 0         | 0         | 0         | 0         |
| K05783 | 0         | 0         | 0         | 1         | 0         | 0         | 0         | 0         | 0         | 0         | 0         | 0         | 0         | 0         | 0         | 0         |
| K05797 | 0         | 0         | 0         | 0         | 0         | 0         | 0         | 0         | 0         | 0         | 0         | 0         | 0         | 0         | 0         | 0         |
| K06281 | 2         | 1         | 1         | 3         | 1         | 0         | 3         | 3         | 2         | 0         | 0         | 2         | 1         | 2         | 1         | 0         |
| K06446 | 6         | 4         | 3         | 4         | 3         | 5         | 3         | 2         | 1         | 4         | 2         | 3         | 1         | 0         | 1         | 1         |
| K06912 | 0         | 0         | 0         | 0         | 0         | 0         | 0         | 0         | 0         | 0         | 0         | 0         | 0         | 0         | 0         | 0         |
| K07535 | 0         | 0         | 0         | 0         | 0         | 0         | 0         | 1         | 0         | 0         | 0         | 0         | 0         | 0         | 0         | 0         |
| K07536 | 1         | 1         | 1         | 2         | 1         | 1         | 0         | 2         | 0         | 1         | 2         | 0         | 0         | 1         | 2         | 2         |
| K08689 | 0         | 0         | 0         | 0         | 0         | 0         | 0         | 0         | 0         | 0         | 0         | 0         | 0         | 0         | 0         | 0         |
| K08710 | 0         | 1         | 0         | 0         | 0         | 0         | 0         | 0         | 0         | 0         | 0         | 1         | 0         | 0         | 0         | 0         |
| K09461 | 0         | 0         | 1         | 0         | 0         | 0         | 0         | 0         | 0         | 1         | 1         | 0         | 0         | 1         | 0         | 1         |
| K10217 | 0         | 0         | 0         | 0         | 0         | 0         | 1         | 0         | 0         | 0         | 0         | 0         | 0         | 0         | 0         | 0         |
| K10218 | 0         | 1         | 0         | 1         | 1         | 0         | 0         | 0         | 0         | 0         | 0         | 1         | 0         | 0         | 0         | 1         |
| K10220 | 0         | 0         | 0         | 0         | 0         | 0         | 0         | 0         | 0         | 0         | 0         | 0         | 0         | 0         | 0         | 0         |
| K11180 | 0         | 0         | 0         | 0         | 0         | 0         | 0         | 1         | 0         | 0         | 0         | 0         | 0         | 0         | 0         | 0         |
| K13953 | 0         | 1         | 4         | 2         | 0         | 1         | 1         | 1         | 0         | 0         | 0         | 1         | 0         | 3         | 0         | 0         |
| K14333 | 0         | 0         | 0         | 0         | 0         | 0         | 0         | 0         | 0         | 0         | 0         | 0         | 0         | 0         | 0         | 0         |
| K14519 | 0         | 0         | 0         | 1         | 0         | 0         | 0         | 0         | 0         | 0         | 0         | 0         | 0         | 0         | 0         | 0         |
| K15054 | 0         | 0         | 0         | 0         | 0         | 0         | 0         | 0         | 0         | 0         | 0         | 0         | 0         | 0         | 0         | 0         |
| K16173 | 0         | 0         | 0         | 0         | 0         | 0         | 0         | 0         | 0         | 1         | 1         | 1         | 0         | 0         | 0         | 0         |
| K16514 | 0         | 1         | 0         | 0         | 0         | 0         | 1         | 0         | 0         | 0         | 0         | 1         | 0         | 0         | 0         | 0         |
| K16874 | 0         | 0         | 0         | 0         | 0         | 0         | 0         | 0         | 0         | 0         | 0         | 0         | 0         | 0         | 0         | 0         |



| EC/KO      | CH-DOM001 | CH-DOM003 | CH-DOM005 | CH-DOM008 | CH-DOM010 | CH-DOM012 | CH-DOM013 | CH-DOM014 | CH-DOM015 | CH-DOM016 | CH-DOM017 | CH-DOM018 | CH-DOM019 | CH-DOM020 | CH-DOM021 |
|------------|-----------|-----------|-----------|-----------|-----------|-----------|-----------|-----------|-----------|-----------|-----------|-----------|-----------|-----------|-----------|
| 1.1.1.-    | 34        | 22        | 40        | 41        | 55        | 26        | 45        | 13        | 24        | 53        | 33        | 38        | 40        | 22        | 26        |
| 1.1.1.1    | 18        | 21        | 20        | 18        | 37        | 12        | 36        | 9         | 18        | 35        | 21        | 32        | 31        | 17        | 13        |
| 1.1.1.157  | 0         | 0         | 1         | 0         | 1         | 1         | 0         | 0         | 1         | 1         | 1         | 0         | 0         | 0         | 1         |
| 1.1.1.205  | 14        | 13        | 11        | 13        | 24        | 10        | 18        | 10        | 15        | 29        | 15        | 18        | 22        | 14        | 11        |
| 1.1.1.35   | 3         | 0         | 2         | 0         | 0         | 2         | 0         | 1         | 2         | 3         | 1         | 2         | 0         | 1         | 0         |
| 1.12.99.6  | 2         | 2         | 1         | 4         | 3         | 0         | 3         | 0         | 0         | 5         | 0         | 1         | 2         | 1         | 1         |
| 1.13.11.-  | 0         | 0         | 0         | 0         | 0         | 0         | 0         | 0         | 0         | 0         | 0         | 0         | 0         | 0         | 0         |
| 1.13.11.1  | 0         | 0         | 0         | 0         | 0         | 0         | 0         | 0         | 0         | 0         | 0         | 0         | 0         | 0         | 0         |
| 1.13.11.2  | 0         | 0         | 0         | 0         | 0         | 0         | 0         | 0         | 0         | 0         | 0         | 0         | 0         | 0         | 0         |
| 1.13.11.3  | 0         | 0         | 0         | 0         | 0         | 0         | 0         | 0         | 0         | 0         | 0         | 0         | 0         | 0         | 0         |
| 1.13.11.39 | 0         | 0         | 0         | 0         | 0         | 0         | 0         | 0         | 0         | 0         | 0         | 0         | 0         | 0         | 0         |
| 1.13.11.5  | 0         | 0         | 0         | 0         | 0         | 0         | 0         | 1         | 0         | 0         | 1         | 0         | 1         | 0         | 0         |
| 1.13.11.8  | 0         | 0         | 0         | 0         | 0         | 0         | 0         | 0         | 0         | 0         | 0         | 0         | 0         | 0         | 0         |
| 1.14.12.10 | 0         | 0         | 0         | 0         | 0         | 1         | 0         | 0         | 0         | 1         | 0         | 0         | 0         | 0         | 0         |
| 1.14.12.13 | 0         | 0         | 0         | 0         | 0         | 0         | 0         | 0         | 0         | 0         | 0         | 0         | 0         | 0         | 0         |
| 1.14.12.18 | 1         | 0         | 0         | 0         | 0         | 0         | 0         | 0         | 0         | 0         | 0         | 0         | 0         | 0         | 0         |
| 1.14.13.-  | 2         | 2         | 3         | 1         | 0         | 4         | 0         | 0         | 0         | 2         | 0         | 0         | 0         | 0         | 0         |
| 1.14.13.1  | 0         | 0         | 0         | 0         | 0         | 0         | 0         | 0         | 0         | 0         | 0         | 0         | 0         | 0         | 0         |
| 1.14.13.2  | 0         | 0         | 0         | 0         | 0         | 0         | 0         | 0         | 0         | 0         | 0         | 0         | 0         | 0         | 0         |
| 1.14.13.50 | 0         | 0         | 0         | 0         | 0         | 0         | 0         | 0         | 0         | 0         | 0         | 0         | 0         | 0         | 0         |
| 1.14.13.7  | 0         | 0         | 0         | 0         | 0         | 0         | 0         | 0         | 0         | 0         | 0         | 0         | 1         | 0         | 0         |
| 1.14.13.8  | 0         | 0         | 0         | 0         | 0         | 0         | 0         | 0         | 0         | 0         | 0         | 0         | 0         | 0         | 0         |
| 1.14.13.82 | 0         | 0         | 1         | 0         | 0         | 0         | 0         | 0         | 0         | 0         | 0         | 0         | 0         | 0         | 0         |
| 1.14.99.-  | 0         | 0         | 0         | 0         | 0         | 0         | 0         | 0         | 0         | 0         | 0         | 0         | 0         | 0         | 0         |
| 1.17.99.1  | 0         | 0         | 0         | 0         | 0         | 1         | 0         | 0         | 0         | 0         | 0         | 0         | 0         | 0         | 0         |
| 1.18.6.1   | 0         | 0         | 0         | 0         | 0         | 0         | 0         | 0         | 0         | 0         | 0         | 0         | 0         | 0         | 0         |
| 1.2.1.-    | 0         | 2         | 1         | 1         | 0         | 0         | 0         | 0         | 0         | 0         | 0         | 0         | 0         | 0         | 0         |
| 1.2.1.10   | 3         | 2         | 4         | 2         | 6         | 3         | 4         | 2         | 3         | 6         | 3         | 5         | 4         | 2         | 0         |
| 1.2.1.3    | 5         | 3         | 7         | 8         | 5         | 6         | 6         | 1         | 4         | 5         | 2         | 3         | 5         | 0         | 1         |
| 1.2.1.39   | 1         | 0         | 0         | 0         | 0         | 0         | 0         | 0         | 0         | 0         | 0         | 0         | 0         | 0         | 0         |
| 1.2.7.1    | 4         | 4         | 7         | 10        | 13        | 5         | 13        | 5         | 6         | 9         | 6         | 3         | 9         | 2         | 2         |
| 1.2.99.2   | 3         | 1         | 2         | 5         | 1         | 2         | 1         | 0         | 1         | 6         | 2         | 0         | 0         | 1         | 1         |
| 1.3.1.-    | 0         | 0         | 0         | 2         | 0         | 0         | 0         | 0         | 1         | 2         | 0         | 1         | 0         | 0         | 1         |
| 1.3.1.2    | 1         | 1         | 1         | 2         | 1         | 0         | 0         | 0         | 1         | 1         | 0         | 0         | 2         | 0         | 0         |
| 1.3.1.25   | 0         | 0         | 0         | 0         | 0         | 0         | 0         | 0         | 0         | 0         | 0         | 0         | 0         | 0         | 0         |
| 1.3.99.-   | 0         | 0         | 0         | 0         | 0         | 0         | 0         | 0         | 0         | 1         | 0         | 0         | 0         | 0         | 0         |
| 1.6.5.-    | 37        | 10        | 31        | 21        | 48        | 23        | 37        | 21        | 25        | 33        | 35        | 31        | 51        | 15        | 40        |
| 1.7.1.-    | 5         | 5         | 6         | 7         | 10        | 10        | 9         | 4         | 3         | 13        | 5         | 6         | 5         | 4         | 6         |
| 1.8.99.3   | 0         | 0         | 0         | 0         | 0         | 1         | 1         | 0         | 0         | 1         | 0         | 1         | 0         | 0         | 0         |
| 2.1.1.-    | 141       | 103       | 108       | 116       | 197       | 144       | 224       | 100       | 120       | 204       | 117       | 174       | 202       | 90        | 94        |
| 2.3.1.-    | 124       | 38        | 100       | 103       | 113       | 94        | 120       | 67        | 92        | 116       | 94        | 89        | 130       | 62        | 80        |
| 2.3.1.16   | 1         | 0         | 2         | 0         | 4         | 3         | 3         | 0         | 1         | 2         | 1         | 0         | 2         | 0         | 0         |
| 2.3.1.5    | 0         | 1         | 1         | 1         | 0         | 0         | 0         | 0         | 0         | 0         | 0         | 0         | 0         | 0         | 0         |
| 2.3.1.9    | 2         | 3         | 1         | 3         | 1         | 2         | 0         | 0         | 1         | 1         | 1         | 0         | 0         | 0         | 0         |
| 2.4.2.10   | 9         | 8         | 3         | 6         | 15        | 11        | 15        | 7         | 6         | 15        | 9         | 14        | 13        | 4         | 7         |
| 2.4.2.3    | 3         | 5         | 4         | 1         | 11        | 4         | 9         | 0         | 4         | 5         | 5         | 7         | 5         | 0         | 1         |
| 2.4.2.4    | 1         | 1         | 2         | 1         | 0         | 1         | 4         | 2         | 2         | 3         | 2         | 2         | 1         | 2         | 1         |
| 2.4.2.8    | 12        | 7         | 9         | 5         | 8         | 8         | 11        | 5         | 4         | 12        | 5         | 7         | 8         | 4         | 6         |
| 2.5.1.-    | 18        | 7         | 12        | 18        | 17        | 17        | 16        | 8         | 7         | 22        | 9         | 12        | 20        | 6         | 11        |

| EC/KO    | CH-DOM001 | CH-DOM003 | CH-DOM005 | CH-DOM008 | CH-DOM010 | CH-DOM012 | CH-DOM013 | CH-DOM014 | CH-DOM015 | CH-DOM016 | CH-DOM017 | CH-DOM018 | CH-DOM019 | CH-DOM020 | CH-DOM021 |
|----------|-----------|-----------|-----------|-----------|-----------|-----------|-----------|-----------|-----------|-----------|-----------|-----------|-----------|-----------|-----------|
| 2.5.1.18 | 1         | 2         | 5         | 5         | 0         | 4         | 0         | 0         | 0         | 9         | 1         | 1         | 1         | 0         | 0         |
| 2.6.1.-  | 23        | 15        | 14        | 26        | 28        | 12        | 27        | 9         | 22        | 32        | 27        | 14        | 38        | 16        | 15        |
| 2.7.1.21 | 5         | 0         | 6         | 3         | 8         | 3         | 6         | 2         | 3         | 7         | 6         | 2         | 6         | 3         | 4         |
| 2.7.1.48 | 22        | 10        | 14        | 15        | 25        | 14        | 24        | 7         | 19        | 25        | 17        | 12        | 20        | 10        | 15        |
| 2.7.4.-  | 15        | 8         | 10        | 5         | 18        | 7         | 14        | 4         | 5         | 12        | 8         | 10        | 12        | 6         | 8         |
| 2.8.3.-  | 2         | 3         | 1         | 1         | 2         | 0         | 4         | 0         | 1         | 2         | 0         | 1         | 2         | 1         | 3         |
| 2.8.3.1  | 0         | 0         | 0         | 0         | 0         | 0         | 0         | 0         | 0         | 0         | 0         | 0         | 0         | 0         | 0         |
| 2.8.3.12 | 2         | 0         | 0         | 0         | 1         | 0         | 1         | 0         | 1         | 0         | 0         | 1         | 1         | 0         | 0         |
| 2.8.3.6  | 0         | 0         | 0         | 0         | 0         | 1         | 0         | 1         | 0         | 1         | 0         | 0         | 1         | 0         | 1         |
| 2.8.3.8  | 2         | 2         | 1         | 0         | 0         | 1         | 3         | 0         | 0         | 1         | 0         | 0         | 1         | 0         | 0         |
| 3.1.1.-  | 3         | 2         | 6         | 5         | 6         | 7         | 5         | 1         | 2         | 13        | 4         | 2         | 6         | 1         | 2         |
| 3.1.1.1  | 5         | 2         | 4         | 4         | 3         | 3         | 2         | 1         | 5         | 4         | 7         | 5         | 4         | 7         | 5         |
| 3.1.1.17 | 3         | 0         | 5         | 1         | 3         | 0         | 2         | 0         | 1         | 3         | 2         | 2         | 2         | 2         | 1         |
| 3.1.1.2  | 1         | 0         | 1         | 1         | 0         | 0         | 0         | 0         | 0         | 0         | 0         | 0         | 0         | 0         | 0         |
| 3.1.1.24 | 0         | 1         | 1         | 1         | 4         | 1         | 0         | 1         | 2         | 4         | 2         | 4         | 2         | 1         | 0         |
| 3.1.1.45 | 1         | 0         | 0         | 1         | 0         | 0         | 0         | 0         | 0         | 1         | 0         | 0         | 0         | 0         | 0         |
| 3.1.2.-  | 1         | 1         | 2         | 2         | 0         | 0         | 1         | 0         | 0         | 1         | 0         | 1         | 0         | 0         | 1         |
| 3.1.2.23 | 3         | 0         | 4         | 4         | 6         | 2         | 4         | 3         | 0         | 4         | 3         | 1         | 2         | 3         | 7         |
| 3.1.3.1  | 18        | 2         | 13        | 17        | 23        | 6         | 19        | 5         | 13        | 21        | 14        | 9         | 16        | 12        | 13        |
| 3.1.3.2  | 4         | 2         | 5         | 5         | 8         | 3         | 4         | 2         | 5         | 8         | 4         | 4         | 7         | 6         | 7         |
| 3.1.3.41 | 0         | 1         | 0         | 0         | 0         | 0         | 0         | 0         | 0         | 0         | 0         | 0         | 0         | 0         | 0         |
| 3.2.1.31 | 1         | 3         | 2         | 2         | 4         | 0         | 0         | 0         | 6         | 6         | 2         | 1         | 1         | 1         | 1         |
| 3.3.2.9  | 0         | 0         | 1         | 0         | 0         | 0         | 0         | 0         | 0         | 0         | 0         | 0         | 0         | 0         | 0         |
| 3.5.1.-  | 16        | 9         | 7         | 9         | 21        | 10        | 21        | 10        | 11        | 17        | 9         | 9         | 13        | 5         | 7         |
| 3.5.1.4  | 2         | 3         | 0         | 0         | 4         | 2         | 2         | 0         | 1         | 4         | 1         | 2         | 2         | 0         | 1         |
| 3.5.1.5  | 1         | 0         | 1         | 0         | 0         | 2         | 2         | 0         | 1         | 1         | 0         | 2         | 1         | 0         | 1         |
| 3.5.1.54 | 2         | 2         | 1         | 2         | 0         | 4         | 2         | 3         | 2         | 2         | 0         | 1         | 1         | 1         | 0         |
| 3.5.1.6  | 1         | 0         | 1         | 2         | 1         | 4         | 1         | 0         | 1         | 3         | 0         | 1         | 3         | 0         | 0         |
| 3.5.2.-  | 0         | 0         | 0         | 0         | 0         | 0         | 0         | 0         | 0         | 0         | 0         | 0         | 0         | 0         | 0         |
| 3.5.2.2  | 1         | 0         | 1         | 1         | 3         | 0         | 0         | 0         | 0         | 0         | 0         | 0         | 1         | 0         | 0         |
| 3.5.4.-  | 17        | 11        | 10        | 13        | 18        | 17        | 20        | 11        | 9         | 17        | 10        | 9         | 16        | 8         | 13        |
| 3.5.4.5  | 7         | 1         | 4         | 5         | 11        | 8         | 7         | 7         | 6         | 10        | 8         | 3         | 12        | 5         | 8         |
| 3.5.5.1  | 0         | 0         | 1         | 0         | 2         | 0         | 1         | 1         | 0         | 1         | 1         | 0         | 0         | 0         | 0         |
| 3.5.5.7  | 0         | 0         | 0         | 0         | 0         | 0         | 0         | 0         | 0         | 0         | 0         | 0         | 0         | 0         | 0         |
| 3.5.99.3 | 0         | 0         | 0         | 0         | 1         | 0         | 0         | 0         | 0         | 0         | 0         | 0         | 0         | 0         | 0         |
| 3.6.1.7  | 0         | 4         | 1         | 2         | 3         | 0         | 3         | 0         | 1         | 5         | 0         | 7         | 1         | 3         | 1         |
| 3.7.1.-  | 0         | 1         | 2         | 0         | 1         | 1         | 2         | 0         | 1         | 2         | 1         | 0         | 1         | 1         | 1         |
| 3.7.1.2  | 5         | 0         | 2         | 4         | 8         | 3         | 5         | 2         | 2         | 4         | 4         | 3         | 3         | 3         | 3         |
| 3.8.1.2  | 10        | 3         | 6         | 7         | 9         | 5         | 5         | 6         | 7         | 5         | 4         | 5         | 5         | 4         | 4         |
| 3.8.1.3  | 0         | 0         | 0         | 0         | 0         | 0         | 0         | 0         | 0         | 0         | 0         | 0         | 0         | 0         | 0         |
| 3.8.1.5  | 1         | 1         | 1         | 0         | 2         | 0         | 0         | 0         | 0         | 1         | 1         | 0         | 0         | 0         | 0         |
| 4.1.1.-  | 11        | 9         | 12        | 9         | 14        | 4         | 11        | 2         | 9         | 15        | 4         | 12        | 11        | 5         | 10        |
| 4.1.1.44 | 13        | 5         | 10        | 8         | 22        | 16        | 22        | 16        | 12        | 21        | 11        | 9         | 17        | 6         | 11        |
| 4.1.1.55 | 0         | 0         | 0         | 0         | 0         | 0         | 0         | 0         | 0         | 0         | 0         | 1         | 0         | 0         | 0         |
| 4.1.1.7  | 0         | 0         | 0         | 0         | 0         | 0         | 0         | 0         | 0         | 0         | 0         | 0         | 0         | 0         | 0         |
| 4.1.1.70 | 0         | 0         | 0         | 1         | 0         | 1         | 0         | 0         | 0         | 0         | 0         | 0         | 0         | 0         | 0         |
| 4.1.1.77 | 0         | 0         | 0         | 0         | 0         | 0         | 0         | 0         | 0         | 0         | 0         | 0         | 0         | 0         | 0         |
| 4.1.2.-  | 5         | 7         | 2         | 6         | 2         | 3         | 3         | 2         | 4         | 8         | 4         | 3         | 3         | 4         | 1         |
| 4.1.3.-  | 7         | 6         | 9         | 10        | 14        | 7         | 10        | 4         | 10        | 18        | 15        | 17        | 14        | 7         | 6         |

| EC/KO    | CH-DOM001 | CH-DOM003 | CH-DOM005 | CH-DOM008 | CH-DOM010 | CH-DOM012 | CH-DOM013 | CH-DOM014 | CH-DOM015 | CH-DOM016 | CH-DOM017 | CH-DOM018 | CH-DOM019 | CH-DOM020 | CH-DOM021 |
|----------|-----------|-----------|-----------|-----------|-----------|-----------|-----------|-----------|-----------|-----------|-----------|-----------|-----------|-----------|-----------|
| 4.1.3.39 | 0         | 0         | 0         | 0         | 0         | 0         | 0         | 0         | 0         | 2         | 1         | 0         | 1         | 0         | 0         |
| 4.1.99.- | 0         | 0         | 2         | 1         | 0         | 0         | 2         | 0         | 1         | 2         | 0         | 0         | 1         | 0         | 0         |
| 4.2.1.-  | 49        | 9         | 42        | 38        | 48        | 23        | 43        | 10        | 31        | 51        | 33        | 31        | 43        | 15        | 24        |
| 4.2.1.17 | 1         | 1         | 5         | 1         | 4         | 7         | 4         | 4         | 2         | 7         | 5         | 4         | 5         | 2         | 2         |
| 4.2.1.80 | 0         | 0         | 1         | 0         | 0         | 0         | 0         | 0         | 0         | 0         | 0         | 0         | 0         | 0         | 0         |
| 4.2.1.83 | 0         | 0         | 0         | 0         | 1         | 0         | 0         | 0         | 0         | 1         | 1         | 0         | 0         | 0         | 0         |
| 4.2.1.84 | 0         | 0         | 0         | 0         | 0         | 0         | 0         | 0         | 0         | 1         | 0         | 0         | 0         | 0         | 0         |
| 5.1.2.2  | 0         | 0         | 0         | 0         | 0         | 0         | 0         | 0         | 0         | 0         | 0         | 0         | 0         | 0         | 0         |
| 5.2.1.2  | 0         | 0         | 0         | 0         | 0         | 0         | 0         | 0         | 0         | 0         | 0         | 0         | 0         | 0         | 0         |
| 5.3.3.4  | 0         | 0         | 0         | 0         | 0         | 0         | 0         | 0         | 0         | 0         | 0         | 0         | 0         | 0         | 0         |
| 5.3.99.- | 2         | 1         | 5         | 2         | 2         | 1         | 3         | 1         | 1         | 0         | 0         | 1         | 1         | 0         | 1         |
| 5.4.99.- | 1         | 0         | 0         | 0         | 1         | 0         | 0         | 0         | 0         | 0         | 0         | 0         | 0         | 0         | 1         |
| 5.5.1.1  | 4         | 0         | 3         | 5         | 5         | 2         | 2         | 1         | 3         | 6         | 3         | 3         | 4         | 1         | 3         |
| 5.5.1.2  | 0         | 0         | 0         | 0         | 0         | 0         | 0         | 0         | 0         | 0         | 0         | 0         | 0         | 0         | 0         |
| 6.2.1.-  | 0         | 0         | 0         | 0         | 0         | 1         | 0         | 0         | 0         | 0         | 0         | 0         | 0         | 0         | 0         |
| 6.3.5.2  | 14        | 11        | 12        | 14        | 27        | 14        | 14        | 7         | 13        | 25        | 11        | 19        | 21        | 9         | 9         |
| K00002   | 0         | 1         | 0         | 0         | 0         | 2         | 1         | 0         | 1         | 1         | 0         | 1         | 2         | 0         | 0         |
| K00055   | 0         | 0         | 1         | 1         | 0         | 0         | 0         | 0         | 0         | 0         | 0         | 0         | 0         | 0         | 0         |
| K00074   | 4         | 1         | 2         | 0         | 1         | 5         | 4         | 1         | 4         | 2         | 4         | 6         | 2         | 2         | 2         |
| K00088   | 16        | 9         | 10        | 12        | 21        | 7         | 16        | 7         | 7         | 23        | 10        | 16        | 20        | 7         | 9         |
| K00100   | 37        | 19        | 30        | 36        | 64        | 29        | 41        | 11        | 22        | 50        | 25        | 34        | 38        | 19        | 22        |
| K00128   | 0         | 3         | 1         | 1         | 0         | 1         | 0         | 0         | 0         | 0         | 0         | 1         | 0         | 0         | 0         |
| K00129   | 0         | 0         | 0         | 0         | 0         | 0         | 0         | 0         | 0         | 0         | 0         | 0         | 0         | 0         | 0         |
| K00132   | 0         | 0         | 0         | 0         | 0         | 0         | 0         | 0         | 0         | 0         | 0         | 0         | 0         | 0         | 0         |
| K00141   | 0         | 0         | 0         | 0         | 0         | 0         | 0         | 0         | 0         | 0         | 0         | 0         | 0         | 0         | 0         |
| K00146   | 0         | 0         | 2         | 0         | 0         | 0         | 0         | 0         | 0         | 0         | 0         | 0         | 0         | 0         | 0         |
| K00148   | 0         | 0         | 0         | 0         | 0         | 0         | 0         | 0         | 0         | 0         | 0         | 0         | 0         | 0         | 0         |
| K00155   | 1         | 0         | 1         | 0         | 0         | 0         | 0         | 0         | 0         | 0         | 0         | 1         | 0         | 0         | 0         |
| K00169   | 0         | 1         | 1         | 1         | 1         | 2         | 1         | 0         | 1         | 4         | 1         | 0         | 2         | 0         | 0         |
| K00224   | 1         | 0         | 0         | 0         | 0         | 0         | 1         | 0         | 0         | 1         | 0         | 2         | 0         | 0         | 0         |
| K00274   | 0         | 0         | 0         | 0         | 0         | 1         | 0         | 0         | 0         | 0         | 0         | 0         | 0         | 0         | 0         |
| K00446   | 0         | 0         | 0         | 0         | 0         | 0         | 0         | 0         | 0         | 0         | 0         | 0         | 0         | 0         | 0         |
| K00448   | 0         | 0         | 0         | 0         | 0         | 0         | 0         | 0         | 0         | 0         | 0         | 0         | 0         | 0         | 0         |
| K00462   | 0         | 0         | 1         | 1         | 0         | 2         | 2         | 0         | 0         | 2         | 1         | 3         | 0         | 0         | 0         |
| K00480   | 0         | 0         | 0         | 0         | 0         | 1         | 0         | 0         | 0         | 0         | 0         | 0         | 0         | 0         | 0         |
| K00481   | 0         | 0         | 0         | 0         | 0         | 0         | 0         | 0         | 0         | 0         | 0         | 0         | 0         | 0         | 0         |
| K00539   | 0         | 0         | 0         | 0         | 0         | 0         | 0         | 0         | 0         | 1         | 0         | 1         | 0         | 0         | 0         |
| K00599   | 23        | 19        | 23        | 14        | 37        | 10        | 31        | 10        | 16        | 31        | 27        | 31        | 33        | 14        | 17        |
| K00626   | 4         | 6         | 2         | 4         | 5         | 3         | 7         | 1         | 4         | 4         | 2         | 1         | 5         | 0         | 0         |
| K00632   | 0         | 0         | 0         | 1         | 0         | 1         | 0         | 0         | 0         | 0         | 0         | 0         | 0         | 0         | 0         |
| K00680   | 31        | 16        | 28        | 20        | 37        | 20        | 31        | 20        | 18        | 36        | 36        | 24        | 36        | 19        | 21        |
| K00757   | 11        | 6         | 9         | 7         | 17        | 6         | 13        | 4         | 5         | 10        | 6         | 9         | 9         | 4         | 8         |
| K00758   | 2         | 2         | 1         | 1         | 1         | 1         | 2         | 0         | 3         | 1         | 0         | 1         | 3         | 0         | 0         |
| K00760   | 15        | 7         | 8         | 6         | 12        | 12        | 19        | 9         | 7         | 15        | 7         | 13        | 15        | 7         | 10        |
| K00799   | 0         | 1         | 3         | 2         | 0         | 4         | 0         | 0         | 0         | 2         | 0         | 0         | 0         | 0         | 0         |
| K00857   | 12        | 1         | 6         | 3         | 10        | 5         | 12        | 6         | 7         | 7         | 6         | 7         | 11        | 4         | 6         |
| K00876   | 29        | 9         | 13        | 15        | 26        | 14        | 24        | 9         | 16        | 25        | 12        | 15        | 20        | 12        | 15        |
| K01026   | 0         | 1         | 2         | 1         | 1         | 0         | 3         | 0         | 0         | 1         | 0         | 0         | 0         | 0         | 0         |
| K01031   | 0         | 0         | 0         | 0         | 0         | 1         | 0         | 0         | 0         | 0         | 0         | 0         | 0         | 0         | 0         |

| EC/KO  | CH-DOM001 | CH-DOM003 | CH-DOM005 | CH-DOM008 | CH-DOM010 | CH-DOM012 | CH-DOM013 | CH-DOM014 | CH-DOM015 | CH-DOM016 | CH-DOM017 | CH-DOM018 | CH-DOM019 | CH-DOM020 | CH-DOM021 |
|--------|-----------|-----------|-----------|-----------|-----------|-----------|-----------|-----------|-----------|-----------|-----------|-----------|-----------|-----------|-----------|
| K01034 | 3         | 0         | 1         | 0         | 1         | 2         | 2         | 1         | 0         | 1         | 0         | 0         | 1         | 0         | 0         |
| K01039 | 1         | 0         | 0         | 1         | 0         | 0         | 0         | 0         | 1         | 0         | 0         | 1         | 1         | 0         | 0         |
| K01041 | 6         | 2         | 4         | 7         | 13        | 2         | 5         | 0         | 6         | 5         | 6         | 4         | 11        | 6         | 6         |
| K01053 | 0         | 0         | 1         | 0         | 0         | 0         | 0         | 0         | 0         | 0         | 0         | 0         | 0         | 0         | 0         |
| K01055 | 0         | 0         | 0         | 0         | 0         | 0         | 0         | 0         | 0         | 0         | 0         | 0         | 0         | 0         | 0         |
| K01061 | 1         | 0         | 1         | 1         | 0         | 0         | 0         | 0         | 0         | 1         | 0         | 0         | 0         | 0         | 0         |
| K01066 | 2         | 2         | 6         | 9         | 3         | 1         | 3         | 1         | 2         | 3         | 5         | 4         | 5         | 5         | 5         |
| K01075 | 1         | 0         | 1         | 1         | 0         | 0         | 0         | 0         | 0         | 1         | 0         | 0         | 0         | 0         | 0         |
| K01077 | 8         | 2         | 7         | 13        | 13        | 5         | 13        | 4         | 8         | 12        | 7         | 7         | 9         | 6         | 7         |
| K01101 | 2         | 3         | 1         | 1         | 2         | 6         | 2         | 1         | 2         | 2         | 0         | 1         | 2         | 0         | 1         |
| K01195 | 5         | 3         | 4         | 6         | 5         | 2         | 4         | 2         | 9         | 7         | 4         | 4         | 5         | 3         | 2         |
| K01426 | 1         | 0         | 1         | 0         | 3         | 1         | 1         | 0         | 1         | 1         | 1         | 0         | 1         | 0         | 0         |
| K01428 | 1         | 0         | 0         | 0         | 1         | 1         | 2         | 0         | 0         | 1         | 0         | 1         | 0         | 1         | 2         |
| K01457 | 0         | 0         | 0         | 0         | 0         | 0         | 0         | 0         | 0         | 0         | 0         | 0         | 0         | 0         | 0         |
| K01464 | 2         | 1         | 1         | 1         | 3         | 1         | 1         | 1         | 1         | 3         | 1         | 0         | 1         | 0         | 0         |
| K01489 | 12        | 4         | 6         | 5         | 14        | 9         | 14        | 7         | 8         | 11        | 9         | 6         | 16        | 6         | 9         |
| K01500 | 0         | 0         | 0         | 0         | 0         | 0         | 0         | 0         | 0         | 0         | 0         | 0         | 0         | 0         | 0         |
| K01501 | 0         | 0         | 1         | 1         | 1         | 2         | 4         | 1         | 0         | 2         | 1         | 1         | 0         | 0         | 0         |
| K01502 | 0         | 0         | 0         | 0         | 0         | 0         | 0         | 0         | 0         | 0         | 0         | 0         | 0         | 0         | 0         |
| K01512 | 1         | 4         | 1         | 2         | 3         | 1         | 6         | 0         | 1         | 6         | 0         | 10        | 2         | 4         | 2         |
| K01560 | 4         | 1         | 0         | 0         | 3         | 4         | 4         | 1         | 2         | 1         | 1         | 3         | 4         | 1         | 0         |
| K01561 | 0         | 0         | 0         | 0         | 0         | 0         | 1         | 0         | 1         | 1         | 0         | 1         | 1         | 0         | 1         |
| K01563 | 0         | 0         | 0         | 0         | 0         | 0         | 0         | 0         | 0         | 0         | 0         | 0         | 0         | 0         | 0         |
| K01564 | 3         | 1         | 0         | 0         | 3         | 0         | 3         | 0         | 1         | 2         | 1         | 0         | 1         | 0         | 3         |
| K01607 | 9         | 3         | 6         | 5         | 9         | 8         | 6         | 8         | 4         | 9         | 6         | 4         | 11        | 3         | 5         |
| K01612 | 0         | 0         | 0         | 0         | 0         | 0         | 0         | 0         | 0         | 0         | 0         | 0         | 0         | 0         | 0         |
| K01615 | 15        | 4         | 12        | 11        | 20        | 9         | 11        | 2         | 10        | 14        | 12        | 9         | 18        | 12        | 8         |
| K01617 | 0         | 0         | 0         | 0         | 0         | 0         | 0         | 0         | 0         | 0         | 0         | 0         | 0         | 0         | 0         |
| K01666 | 0         | 0         | 1         | 0         | 1         | 1         | 4         | 0         | 1         | 5         | 3         | 4         | 5         | 1         | 0         |
| K01692 | 0         | 0         | 1         | 0         | 0         | 1         | 0         | 0         | 0         | 0         | 0         | 0         | 0         | 0         | 0         |
| K01721 | 0         | 0         | 0         | 0         | 0         | 0         | 0         | 0         | 0         | 0         | 0         | 0         | 0         | 0         | 0         |
| K01726 | 8         | 4         | 4         | 9         | 13        | 3         | 5         | 1         | 5         | 7         | 8         | 2         | 5         | 3         | 4         |
| K01781 | 1         | 0         | 1         | 0         | 1         | 1         | 0         | 0         | 0         | 2         | 0         | 0         | 0         | 0         | 0         |
| K01821 | 2         | 1         | 0         | 0         | 1         | 1         | 3         | 1         | 1         | 2         | 2         | 1         | 1         | 1         | 1         |
| K01856 | 0         | 0         | 0         | 0         | 0         | 0         | 0         | 0         | 0         | 0         | 0         | 0         | 0         | 0         | 0         |
| K01857 | 0         | 0         | 0         | 0         | 0         | 0         | 0         | 0         | 0         | 0         | 0         | 0         | 0         | 0         | 0         |
| K01913 | 0         | 0         | 0         | 0         | 0         | 1         | 1         | 0         | 0         | 0         | 0         | 0         | 0         | 0         | 0         |
| K01951 | 14        | 8         | 8         | 12        | 25        | 13        | 15        | 6         | 13        | 16        | 9         | 15        | 20        | 6         | 8         |
| K02554 | 0         | 0         | 0         | 0         | 0         | 0         | 0         | 0         | 0         | 0         | 0         | 0         | 0         | 0         | 0         |
| K03381 | 0         | 0         | 0         | 0         | 0         | 0         | 0         | 0         | 0         | 0         | 0         | 0         | 0         | 0         | 0         |
| K03382 | 0         | 0         | 1         | 0         | 1         | 2         | 0         | 1         | 0         | 0         | 0         | 0         | 2         | 0         | 0         |
| K03464 | 0         | 0         | 0         | 0         | 0         | 0         | 0         | 0         | 0         | 0         | 0         | 0         | 0         | 0         | 0         |
| K03518 | 11        | 6         | 11        | 7         | 7         | 6         | 10        | 4         | 7         | 9         | 2         | 9         | 6         | 3         | 1         |
| K03862 | 0         | 0         | 0         | 0         | 0         | 0         | 0         | 0         | 0         | 0         | 0         | 0         | 0         | 0         | 0         |
| K04099 | 0         | 0         | 0         | 0         | 0         | 0         | 0         | 0         | 0         | 0         | 0         | 0         | 0         | 0         | 0         |
| K04100 | 0         | 0         | 0         | 0         | 0         | 0         | 0         | 0         | 0         | 0         | 0         | 0         | 0         | 0         | 0         |
| K04102 | 0         | 0         | 0         | 0         | 0         | 0         | 0         | 0         | 0         | 0         | 0         | 1         | 0         | 0         | 0         |
| K04116 | 0         | 0         | 0         | 0         | 0         | 0         | 0         | 0         | 0         | 0         | 0         | 0         | 0         | 0         | 0         |
| K05394 | 0         | 0         | 0         | 0         | 0         | 2         | 1         | 0         | 0         | 2         | 0         | 2         | 0         | 0         | 0         |

| EC/KO  | CH-DOM001 | CH-DOM003 | CH-DOM005 | CH-DOM008 | CH-DOM010 | CH-DOM012 | CH-DOM013 | CH-DOM014 | CH-DOM015 | CH-DOM016 | CH-DOM017 | CH-DOM018 | CH-DOM019 | CH-DOM020 | CH-DOM021 |
|--------|-----------|-----------|-----------|-----------|-----------|-----------|-----------|-----------|-----------|-----------|-----------|-----------|-----------|-----------|-----------|
| K05549 | 0         | 0         | 0         | 0         | 0         | 0         | 0         | 0         | 0         | 0         | 0         | 0         | 0         | 0         | 0         |
| K05783 | 0         | 0         | 0         | 0         | 0         | 0         | 0         | 0         | 0         | 0         | 0         | 0         | 0         | 0         | 0         |
| K05797 | 0         | 0         | 0         | 0         | 0         | 1         | 0         | 0         | 0         | 0         | 0         | 0         | 0         | 0         | 0         |
| K06281 | 1         | 2         | 1         | 3         | 2         | 0         | 2         | 0         | 0         | 5         | 0         | 1         | 2         | 1         | 1         |
| K06446 | 5         | 5         | 1         | 3         | 6         | 4         | 5         | 2         | 4         | 7         | 5         | 5         | 5         | 3         | 5         |
| K06912 | 0         | 0         | 0         | 0         | 0         | 1         | 0         | 0         | 0         | 0         | 0         | 0         | 0         | 0         | 0         |
| K07535 | 0         | 0         | 1         | 0         | 1         | 0         | 0         | 0         | 0         | 0         | 0         | 0         | 0         | 0         | 0         |
| K07536 | 1         | 1         | 2         | 2         | 1         | 1         | 2         | 0         | 0         | 5         | 0         | 2         | 1         | 1         | 1         |
| K08689 | 1         | 0         | 0         | 0         | 0         | 0         | 0         | 0         | 0         | 0         | 0         | 0         | 0         | 0         | 0         |
| K08710 | 0         | 0         | 1         | 1         | 0         | 0         | 0         | 0         | 0         | 1         | 0         | 0         | 0         | 0         | 0         |
| K09461 | 0         | 0         | 0         | 0         | 0         | 0         | 0         | 0         | 0         | 0         | 0         | 0         | 0         | 0         | 0         |
| K10217 | 0         | 0         | 1         | 0         | 0         | 0         | 0         | 0         | 0         | 0         | 0         | 0         | 0         | 0         | 0         |
| K10218 | 1         | 0         | 1         | 0         | 1         | 0         | 0         | 0         | 1         | 0         | 0         | 0         | 0         | 0         | 1         |
| K10220 | 0         | 0         | 0         | 0         | 0         | 1         | 0         | 0         | 0         | 0         | 0         | 0         | 0         | 0         | 0         |
| K11180 | 0         | 0         | 0         | 0         | 1         | 0         | 0         | 0         | 0         | 1         | 0         | 0         | 0         | 0         | 0         |
| K13953 | 0         | 1         | 0         | 0         | 0         | 0         | 0         | 0         | 0         | 0         | 0         | 0         | 1         | 0         | 0         |
| K14333 | 0         | 0         | 0         | 0         | 0         | 0         | 0         | 0         | 0         | 0         | 0         | 0         | 0         | 0         | 0         |
| K14519 | 0         | 0         | 0         | 0         | 0         | 0         | 0         | 0         | 0         | 0         | 0         | 0         | 0         | 0         | 0         |
| K15054 | 0         | 0         | 0         | 0         | 0         | 0         | 0         | 0         | 0         | 0         | 0         | 0         | 0         | 0         | 0         |
| K16173 | 0         | 0         | 0         | 0         | 1         | 0         | 2         | 0         | 0         | 1         | 0         | 0         | 0         | 0         | 0         |
| K16514 | 0         | 0         | 0         | 1         | 0         | 0         | 1         | 0         | 0         | 1         | 0         | 0         | 0         | 0         | 0         |
| K16874 | 0         | 0         | 0         | 0         | 0         | 0         | 0         | 0         | 0         | 0         | 0         | 0         | 0         | 0         | 0         |

| EC/KO      | CH-DOM022 | CH-DOM023 | CH-DOM024 | CH-DOM025 | CH-DOM026 | CH-NLF001 | CH-NLF002 | CH-NLF005 | CH-NLF006 | CH-NLF007 | CH-NLF008 | CH-NLF009 | CH-NLF010 | CH-NLF011 | CH-NLF012 | CH-NLF013 |
|------------|-----------|-----------|-----------|-----------|-----------|-----------|-----------|-----------|-----------|-----------|-----------|-----------|-----------|-----------|-----------|-----------|
| 1.1.1.-    | 63        | 18        | 18        | 34        | 44        | 35        | 27        | 24        | 17        | 42        | 42        | 31        | 24        | 13        | 42        | 42        |
| 1.1.1.1    | 43        | 14        | 11        | 16        | 40        | 17        | 16        | 22        | 13        | 67        | 26        | 21        | 12        | 23        | 43        | 36        |
| 1.1.1.157  | 1         | 0         | 0         | 0         | 0         | 0         | 0         | 0         | 1         | 1         | 0         | 1         | 0         | 0         | 0         | 2         |
| 1.1.1.205  | 26        | 8         | 16        | 11        | 18        | 11        | 13        | 14        | 10        | 34        | 22        | 14        | 8         | 14        | 23        | 24        |
| 1.1.1.35   | 1         | 0         | 1         | 0         | 0         | 1         | 0         | 2         | 0         | 3         | 0         | 0         | 1         | 1         | 1         | 2         |
| 1.12.99.6  | 4         | 1         | 1         | 0         | 0         | 1         | 1         | 0         | 0         | 1         | 3         | 0         | 1         | 0         | 0         | 2         |
| 1.13.11.-  | 0         | 0         | 0         | 0         | 0         | 0         | 0         | 0         | 0         | 0         | 0         | 0         | 0         | 0         | 0         | 0         |
| 1.13.11.1  | 0         | 0         | 0         | 1         | 0         | 0         | 0         | 0         | 0         | 0         | 0         | 0         | 0         | 0         | 0         | 0         |
| 1.13.11.2  | 0         | 0         | 0         | 0         | 0         | 0         | 0         | 0         | 0         | 0         | 0         | 0         | 0         | 0         | 0         | 0         |
| 1.13.11.3  | 0         | 0         | 0         | 0         | 0         | 0         | 0         | 0         | 0         | 0         | 0         | 0         | 0         | 0         | 0         | 0         |
| 1.13.11.39 | 0         | 0         | 0         | 0         | 0         | 0         | 0         | 0         | 0         | 0         | 0         | 0         | 0         | 0         | 0         | 0         |
| 1.13.11.5  | 0         | 0         | 0         | 0         | 0         | 0         | 0         | 0         | 0         | 0         | 0         | 0         | 0         | 0         | 0         | 0         |
| 1.13.11.8  | 0         | 0         | 0         | 1         | 0         | 0         | 0         | 0         | 0         | 0         | 0         | 0         | 0         | 0         | 0         | 0         |
| 1.14.12.10 | 0         | 0         | 0         | 2         | 0         | 0         | 0         | 1         | 0         | 0         | 0         | 1         | 0         | 0         | 0         | 0         |
| 1.14.12.13 | 0         | 0         | 0         | 0         | 0         | 0         | 0         | 0         | 0         | 0         | 0         | 0         | 0         | 0         | 0         | 0         |
| 1.14.12.18 | 0         | 0         | 0         | 0         | 0         | 0         | 0         | 0         | 0         | 0         | 0         | 0         | 0         | 0         | 0         | 0         |
| 1.14.13.-  | 0         | 0         | 0         | 3         | 0         | 0         | 0         | 0         | 0         | 0         | 3         | 0         | 0         | 0         | 0         | 0         |
| 1.14.13.1  | 0         | 0         | 0         | 0         | 0         | 0         | 0         | 0         | 0         | 0         | 0         | 0         | 0         | 0         | 0         | 0         |
| 1.14.13.2  | 0         | 0         | 0         | 1         | 0         | 0         | 0         | 0         | 0         | 0         | 0         | 0         | 0         | 0         | 0         | 0         |
| 1.14.13.50 | 0         | 0         | 0         | 0         | 0         | 0         | 0         | 0         | 0         | 0         | 0         | 0         | 0         | 0         | 0         | 0         |
| 1.14.13.7  | 0         | 0         | 0         | 0         | 0         | 0         | 0         | 0         | 0         | 0         | 0         | 0         | 0         | 0         | 1         | 0         |
| 1.14.13.8  | 0         | 0         | 0         | 0         | 0         | 0         | 0         | 0         | 0         | 0         | 0         | 0         | 0         | 0         | 0         | 0         |
| 1.14.13.82 | 0         | 0         | 0         | 1         | 0         | 0         | 0         | 0         | 0         | 0         | 0         | 0         | 0         | 0         | 0         | 0         |
| 1.14.99.-  | 0         | 0         | 0         | 0         | 0         | 0         | 0         | 0         | 0         | 0         | 0         | 0         | 0         | 0         | 0         | 0         |
| 1.17.99.1  | 0         | 0         | 0         | 0         | 0         | 0         | 0         | 0         | 0         | 0         | 0         | 0         | 0         | 0         | 0         | 0         |
| 1.18.6.1   | 0         | 0         | 0         | 0         | 0         | 0         | 0         | 1         | 0         | 0         | 0         | 0         | 0         | 0         | 0         | 0         |
| 1.2.1.-    | 0         | 0         | 0         | 2         | 0         | 0         | 0         | 0         | 0         | 0         | 0         | 0         | 0         | 0         | 0         | 0         |
| 1.2.1.10   | 3         | 0         | 4         | 3         | 5         | 1         | 4         | 10        | 0         | 6         | 0         | 0         | 2         | 2         | 8         | 5         |
| 1.2.1.3    | 6         | 1         | 2         | 6         | 5         | 1         | 2         | 3         | 0         | 4         | 9         | 4         | 2         | 1         | 5         | 8         |
| 1.2.1.39   | 0         | 0         | 0         | 1         | 0         | 0         | 0         | 0         | 0         | 0         | 0         | 0         | 0         | 0         | 0         | 0         |
| 1.2.7.1    | 10        | 4         | 6         | 5         | 4         | 3         | 2         | 7         | 3         | 11        | 10        | 6         | 2         | 9         | 8         | 15        |
| 1.2.99.2   | 4         | 1         | 1         | 3         | 5         | 0         | 1         | 3         | 0         | 5         | 4         | 0         | 1         | 1         | 0         | 4         |
| 1.3.1.-    | 0         | 2         | 3         | 0         | 0         | 0         | 0         | 1         | 0         | 0         | 0         | 2         | 1         | 1         | 0         | 0         |
| 1.3.1.2    | 0         | 0         | 0         | 0         | 0         | 0         | 0         | 0         | 0         | 1         | 0         | 1         | 0         | 0         | 2         | 0         |
| 1.3.1.25   | 0         | 0         | 0         | 0         | 0         | 0         | 0         | 0         | 0         | 0         | 0         | 0         | 0         | 0         | 0         | 0         |
| 1.3.99.-   | 0         | 0         | 0         | 0         | 0         | 0         | 0         | 0         | 0         | 0         | 0         | 0         | 0         | 0         | 0         | 0         |
| 1.6.5.-    | 40        | 21        | 24        | 33        | 27        | 28        | 18        | 30        | 16        | 47        | 35        | 39        | 16        | 20        | 35        | 32        |
| 1.7.1.-    | 9         | 5         | 4         | 5         | 7         | 3         | 5         | 8         | 6         | 8         | 7         | 8         | 7         | 4         | 10        | 9         |
| 1.8.99.3   | 1         | 0         | 0         | 1         | 0         | 0         | 0         | 0         | 0         | 0         | 0         | 0         | 0         | 0         | 0         | 0         |
| 2.1.1.-    | 231       | 76        | 96        | 110       | 186       | 91        | 92        | 166       | 76        | 233       | 133       | 127       | 78        | 122       | 183       | 230       |
| 2.3.1.-    | 112       | 58        | 72        | 101       | 97        | 81        | 68        | 105       | 39        | 128       | 100       | 115       | 66        | 74        | 106       | 130       |
| 2.3.1.16   | 1         | 0         | 0         | 1         | 1         | 1         | 1         | 2         | 0         | 5         | 0         | 0         | 0         | 3         | 2         | 3         |
| 2.3.1.5    | 0         | 0         | 0         | 0         | 0         | 0         | 0         | 0         | 0         | 0         | 1         | 0         | 0         | 0         | 0         | 0         |
| 2.3.1.9    | 3         | 0         | 0         | 0         | 1         | 1         | 0         | 0         | 0         | 0         | 2         | 0         | 1         | 0         | 1         | 1         |
| 2.4.2.10   | 13        | 4         | 7         | 8         | 13        | 9         | 5         | 11        | 6         | 14        | 6         | 7         | 4         | 6         | 12        | 12        |
| 2.4.2.3    | 8         | 3         | 4         | 1         | 6         | 5         | 4         | 3         | 1         | 13        | 2         | 5         | 4         | 1         | 8         | 6         |
| 2.4.2.4    | 4         | 1         | 1         | 0         | 0         | 1         | 1         | 3         | 0         | 2         | 1         | 0         | 1         | 2         | 3         | 2         |
| 2.4.2.8    | 11        | 4         | 5         | 7         | 10        | 5         | 3         | 8         | 6         | 12        | 5         | 10        | 3         | 8         | 6         | 10        |
| 2.5.1.-    | 16        | 9         | 12        | 13        | 13        | 11        | 10        | 14        | 13        | 22        | 20        | 20        | 12        | 11        | 17        | 18        |

| EC/KO    | CH-DOM022 | CH-DOM023 | CH-DOM024 | CH-DOM025 | CH-DOM026 | CH-NLF001 | CH-NLF002 | CH-NLF005 | CH-NLF006 | CH-NLF007 | CH-NLF008 | CH-NLF009 | CH-NLF010 | CH-NLF011 | CH-NLF012 | CH-NLF013 |
|----------|-----------|-----------|-----------|-----------|-----------|-----------|-----------|-----------|-----------|-----------|-----------|-----------|-----------|-----------|-----------|-----------|
| 2.5.1.18 | 1         | 0         | 0         | 7         | 1         | 0         | 1         | 1         | 0         | 1         | 4         | 1         | 0         | 0         | 0         | 1         |
| 2.6.1.-  | 33        | 12        | 16        | 18        | 22        | 18        | 14        | 26        | 15        | 35        | 22        | 29        | 21        | 19        | 23        | 28        |
| 2.7.1.21 | 3         | 3         | 5         | 4         | 3         | 7         | 4         | 7         | 3         | 6         | 4         | 8         | 6         | 3         | 4         | 5         |
| 2.7.1.48 | 23        | 11        | 15        | 17        | 23        | 15        | 8         | 20        | 12        | 27        | 20        | 15        | 10        | 15        | 19        | 24        |
| 2.7.4.-  | 13        | 4         | 4         | 6         | 13        | 8         | 6         | 12        | 6         | 23        | 8         | 11        | 3         | 10        | 14        | 10        |
| 2.8.3.-  | 2         | 1         | 0         | 1         | 1         | 1         | 1         | 0         | 0         | 2         | 4         | 0         | 1         | 0         | 1         | 1         |
| 2.8.3.1  | 0         | 0         | 0         | 0         | 0         | 1         | 0         | 0         | 0         | 0         | 2         | 0         | 0         | 0         | 0         | 0         |
| 2.8.3.12 | 1         | 0         | 0         | 0         | 0         | 0         | 0         | 0         | 0         | 2         | 0         | 0         | 0         | 0         | 0         | 0         |
| 2.8.3.6  | 0         | 0         | 1         | 1         | 0         | 1         | 0         | 0         | 0         | 0         | 1         | 0         | 0         | 0         | 0         | 0         |
| 2.8.3.8  | 2         | 0         | 0         | 1         | 0         | 0         | 0         | 0         | 0         | 0         | 1         | 0         | 0         | 0         | 1         | 1         |
| 3.1.1.-  | 5         | 2         | 3         | 5         | 6         | 3         | 4         | 2         | 2         | 2         | 5         | 3         | 3         | 0         | 5         | 5         |
| 3.1.1.1  | 7         | 3         | 2         | 3         | 10        | 5         | 4         | 2         | 1         | 3         | 7         | 5         | 4         | 3         | 4         | 6         |
| 3.1.1.17 | 3         | 0         | 2         | 7         | 3         | 2         | 2         | 1         | 0         | 1         | 1         | 1         | 1         | 2         | 2         | 2         |
| 3.1.1.2  | 1         | 0         | 0         | 0         | 0         | 0         | 0         | 0         | 0         | 2         | 1         | 0         | 1         | 0         | 0         | 1         |
| 3.1.1.24 | 1         | 0         | 0         | 0         | 3         | 2         | 0         | 1         | 0         | 4         | 0         | 2         | 1         | 1         | 2         | 3         |
| 3.1.1.45 | 0         | 0         | 0         | 1         | 0         | 0         | 0         | 0         | 0         | 0         | 1         | 0         | 0         | 0         | 0         | 0         |
| 3.1.2.-  | 0         | 0         | 0         | 1         | 0         | 0         | 0         | 0         | 0         | 0         | 3         | 1         | 0         | 0         | 0         | 0         |
| 3.1.2.23 | 3         | 2         | 4         | 5         | 3         | 4         | 2         | 1         | 2         | 4         | 6         | 6         | 3         | 5         | 2         | 1         |
| 3.1.3.1  | 22        | 10        | 13        | 8         | 13        | 7         | 11        | 10        | 8         | 12        | 18        | 10        | 7         | 15        | 17        | 20        |
| 3.1.3.2  | 11        | 4         | 4         | 5         | 4         | 3         | 3         | 5         | 4         | 6         | 5         | 5         | 3         | 5         | 4         | 5         |
| 3.1.3.41 | 0         | 0         | 0         | 0         | 0         | 0         | 0         | 0         | 0         | 0         | 0         | 0         | 0         | 0         | 0         | 0         |
| 3.2.1.31 | 1         | 2         | 1         | 1         | 1         | 3         | 4         | 3         | 0         | 3         | 1         | 0         | 2         | 2         | 3         | 7         |
| 3.3.2.9  | 0         | 0         | 0         | 0         | 0         | 0         | 0         | 0         | 0         | 0         | 0         | 0         | 0         | 0         | 0         | 0         |
| 3.5.1.-  | 14        | 5         | 4         | 10        | 13        | 9         | 4         | 19        | 3         | 20        | 10        | 9         | 6         | 6         | 17        | 21        |
| 3.5.1.4  | 2         | 1         | 1         | 0         | 2         | 2         | 1         | 2         | 0         | 0         | 1         | 0         | 2         | 0         | 2         | 4         |
| 3.5.1.5  | 0         | 0         | 1         | 1         | 2         | 0         | 0         | 1         | 0         | 2         | 1         | 0         | 0         | 0         | 2         | 0         |
| 3.5.1.54 | 2         | 0         | 0         | 1         | 1         | 1         | 0         | 0         | 0         | 2         | 1         | 0         | 0         | 1         | 1         | 0         |
| 3.5.1.6  | 4         | 0         | 0         | 0         | 0         | 1         | 1         | 3         | 0         | 2         | 1         | 0         | 0         | 0         | 4         | 0         |
| 3.5.2.-  | 0         | 0         | 0         | 0         | 0         | 0         | 0         | 0         | 0         | 0         | 0         | 0         | 0         | 0         | 0         | 0         |
| 3.5.2.2  | 3         | 0         | 0         | 0         | 3         | 0         | 0         | 0         | 0         | 1         | 1         | 0         | 0         | 1         | 1         | 0         |
| 3.5.4.-  | 21        | 9         | 7         | 10        | 16        | 10        | 8         | 7         | 7         | 18        | 17        | 12        | 7         | 10        | 13        | 19        |
| 3.5.4.5  | 9         | 3         | 5         | 6         | 7         | 4         | 6         | 9         | 3         | 14        | 7         | 13        | 5         | 5         | 8         | 14        |
| 3.5.5.1  | 1         | 0         | 0         | 0         | 0         | 0         | 0         | 0         | 0         | 1         | 1         | 0         | 0         | 0         | 0         | 1         |
| 3.5.5.7  | 0         | 0         | 0         | 0         | 0         | 0         | 0         | 0         | 0         | 0         | 0         | 0         | 0         | 0         | 0         | 0         |
| 3.5.99.3 | 1         | 0         | 0         | 0         | 0         | 0         | 0         | 0         | 0         | 0         | 0         | 0         | 0         | 0         | 0         | 0         |
| 3.6.1.7  | 3         | 0         | 0         | 1         | 6         | 1         | 1         | 1         | 0         | 6         | 2         | 3         | 1         | 1         | 3         | 5         |
| 3.7.1.-  | 1         | 1         | 0         | 4         | 0         | 1         | 1         | 0         | 0         | 1         | 0         | 0         | 1         | 1         | 2         | 0         |
| 3.7.1.2  | 7         | 3         | 3         | 7         | 0         | 3         | 2         | 2         | 2         | 2         | 7         | 4         | 1         | 3         | 4         | 5         |
| 3.8.1.2  | 6         | 3         | 4         | 4         | 8         | 4         | 4         | 3         | 2         | 11        | 9         | 8         | 3         | 2         | 6         | 6         |
| 3.8.1.3  | 0         | 0         | 0         | 0         | 0         | 0         | 0         | 0         | 0         | 0         | 0         | 0         | 0         | 0         | 0         | 0         |
| 3.8.1.5  | 0         | 0         | 0         | 1         | 0         | 1         | 0         | 0         | 0         | 0         | 0         | 0         | 0         | 0         | 0         | 1         |
| 4.1.1.-  | 11        | 7         | 6         | 12        | 4         | 3         | 1         | 6         | 3         | 8         | 11        | 4         | 4         | 4         | 12        | 5         |
| 4.1.1.44 | 21        | 7         | 9         | 17        | 12        | 15        | 9         | 8         | 7         | 16        | 13        | 14        | 9         | 9         | 16        | 20        |
| 4.1.1.55 | 0         | 0         | 0         | 0         | 0         | 0         | 0         | 0         | 0         | 0         | 0         | 0         | 0         | 0         | 0         | 0         |
| 4.1.1.7  | 0         | 0         | 0         | 0         | 0         | 0         | 0         | 0         | 0         | 0         | 0         | 0         | 0         | 0         | 0         | 0         |
| 4.1.1.70 | 0         | 0         | 0         | 0         | 0         | 0         | 0         | 0         | 0         | 0         | 0         | 0         | 0         | 0         | 0         | 0         |
| 4.1.1.77 | 0         | 0         | 0         | 0         | 0         | 0         | 0         | 0         | 0         | 0         | 0         | 0         | 0         | 0         | 0         | 0         |
| 4.1.2.-  | 1         | 1         | 1         | 4         | 7         | 1         | 3         | 2         | 1         | 6         | 6         | 2         | 0         | 2         | 7         | 2         |
| 4.1.3.-  | 13        | 8         | 6         | 11        | 16        | 5         | 9         | 12        | 4         | 23        | 7         | 13        | 7         | 11        | 16        | 20        |

| EC/KO    | CH-DOM022 | CH-DOM023 | CH-DOM024 | CH-DOM025 | CH-DOM026 | CH-NLF001 | CH-NLF002 | CH-NLF005 | CH-NLF006 | CH-NLF007 | CH-NLF008 | CH-NLF009 | CH-NLF010 | CH-NLF011 | CH-NLF012 | CH-NLF013 |
|----------|-----------|-----------|-----------|-----------|-----------|-----------|-----------|-----------|-----------|-----------|-----------|-----------|-----------|-----------|-----------|-----------|
| 4.1.3.39 | 0         | 0         | 0         | 0         | 0         | 1         | 0         | 1         | 0         | 1         | 0         | 0         | 1         | 1         | 0         | 0         |
| 4.1.99.- | 2         | 0         | 1         | 0         | 1         | 2         | 0         | 1         | 0         | 1         | 0         | 0         | 0         | 1         | 2         | 4         |
| 4.2.1.-  | 53        | 12        | 19        | 32        | 32        | 25        | 33        | 32        | 13        | 53        | 42        | 42        | 22        | 20        | 41        | 33        |
| 4.2.1.17 | 4         | 0         | 1         | 4         | 3         | 4         | 2         | 1         | 0         | 5         | 2         | 5         | 3         | 1         | 3         | 3         |
| 4.2.1.80 | 0         | 0         | 0         | 0         | 0         | 0         | 0         | 0         | 0         | 0         | 0         | 0         | 0         | 0         | 0         | 0         |
| 4.2.1.83 | 1         | 0         | 0         | 0         | 0         | 0         | 1         | 1         | 0         | 1         | 0         | 0         | 1         | 1         | 1         | 0         |
| 4.2.1.84 | 1         | 0         | 0         | 0         | 0         | 0         | 1         | 0         | 1         | 0         | 0         | 0         | 0         | 0         | 0         | 0         |
| 5.1.2.2  | 1         | 0         | 0         | 0         | 0         | 0         | 0         | 0         | 0         | 0         | 0         | 0         | 0         | 0         | 0         | 0         |
| 5.2.1.2  | 0         | 0         | 0         | 0         | 0         | 0         | 0         | 0         | 0         | 0         | 0         | 0         | 0         | 0         | 0         | 0         |
| 5.3.3.4  | 0         | 0         | 0         | 0         | 0         | 0         | 0         | 0         | 0         | 0         | 0         | 0         | 0         | 0         | 0         | 0         |
| 5.3.99.- | 5         | 0         | 1         | 2         | 3         | 1         | 0         | 0         | 0         | 0         | 2         | 3         | 0         | 0         | 0         | 1         |
| 5.4.99.- | 0         | 1         | 0         | 1         | 0         | 0         | 0         | 1         | 2         | 0         | 1         | 2         | 0         | 0         | 1         | 0         |
| 5.5.1.1  | 4         | 2         | 2         | 4         | 2         | 3         | 3         | 2         | 1         | 2         | 5         | 3         | 2         | 1         | 3         | 2         |
| 5.5.1.2  | 0         | 0         | 0         | 0         | 0         | 0         | 0         | 0         | 0         | 0         | 0         | 0         | 0         | 0         | 0         | 0         |
| 6.2.1.-  | 0         | 0         | 0         | 0         | 0         | 0         | 0         | 0         | 0         | 0         | 0         | 0         | 0         | 0         | 0         | 0         |
| 6.3.5.2  | 23        | 8         | 10        | 12        | 18        | 8         | 11        | 13        | 6         | 21        | 16        | 12        | 9         | 12        | 20        | 24        |
| K00002   | 1         | 0         | 0         | 0         | 2         | 0         | 0         | 0         | 0         | 0         | 0         | 0         | 0         | 1         | 0         | 2         |
| K00055   | 1         | 0         | 0         | 1         | 0         | 0         | 0         | 1         | 0         | 0         | 0         | 0         | 0         | 0         | 0         | 0         |
| K00074   | 4         | 0         | 2         | 2         | 1         | 2         | 1         | 3         | 2         | 8         | 0         | 1         | 1         | 2         | 3         | 6         |
| K00088   | 24        | 7         | 8         | 10        | 16        | 9         | 11        | 12        | 5         | 22        | 18        | 10        | 6         | 11        | 20        | 18        |
| K00100   | 61        | 18        | 19        | 32        | 33        | 21        | 20        | 24        | 18        | 45        | 42        | 38        | 16        | 26        | 36        | 28        |
| K00128   | 0         | 0         | 0         | 1         | 0         | 0         | 0         | 1         | 0         | 1         | 1         | 0         | 0         | 0         | 1         | 0         |
| K00129   | 0         | 0         | 0         | 0         | 0         | 0         | 0         | 0         | 0         | 0         | 0         | 0         | 0         | 0         | 0         | 0         |
| K00132   | 0         | 0         | 0         | 0         | 0         | 0         | 0         | 0         | 0         | 0         | 0         | 0         | 1         | 0         | 0         | 0         |
| K00141   | 0         | 0         | 0         | 0         | 0         | 0         | 0         | 0         | 0         | 0         | 0         | 0         | 0         | 0         | 0         | 0         |
| K00146   | 0         | 0         | 0         | 0         | 0         | 0         | 0         | 0         | 0         | 0         | 0         | 0         | 0         | 0         | 0         | 0         |
| K00148   | 0         | 0         | 0         | 0         | 0         | 0         | 0         | 0         | 0         | 0         | 0         | 0         | 0         | 0         | 0         | 0         |
| K00155   | 1         | 0         | 0         | 0         | 0         | 0         | 0         | 0         | 0         | 0         | 1         | 0         | 0         | 0         | 0         | 0         |
| K00169   | 0         | 0         | 0         | 2         | 0         | 0         | 0         | 1         | 0         | 1         | 1         | 0         | 0         | 3         | 1         | 4         |
| K00224   | 1         | 0         | 0         | 0         | 0         | 0         | 0         | 0         | 0         | 0         | 1         | 1         | 0         | 0         | 0         | 1         |
| K00274   | 0         | 0         | 0         | 0         | 0         | 0         | 0         | 0         | 0         | 0         | 0         | 0         | 0         | 0         | 0         | 0         |
| K00446   | 0         | 0         | 0         | 0         | 0         | 0         | 0         | 0         | 0         | 0         | 0         | 0         | 0         | 0         | 0         | 0         |
| K00448   | 0         | 0         | 0         | 0         | 0         | 0         | 0         | 0         | 0         | 0         | 0         | 0         | 0         | 0         | 0         | 0         |
| K00462   | 1         | 0         | 0         | 0         | 1         | 1         | 1         | 0         | 0         | 0         | 2         | 0         | 1         | 0         | 1         | 2         |
| K00480   | 0         | 0         | 0         | 0         | 0         | 0         | 0         | 0         | 0         | 0         | 0         | 0         | 0         | 0         | 0         | 0         |
| K00481   | 0         | 0         | 0         | 1         | 0         | 0         | 0         | 0         | 0         | 0         | 0         | 0         | 0         | 0         | 0         | 0         |
| K00539   | 1         | 0         | 0         | 0         | 0         | 0         | 0         | 0         | 0         | 1         | 1         | 0         | 0         | 0         | 0         | 1         |
| K00599   | 38        | 7         | 13        | 16        | 41        | 18        | 17        | 32        | 13        | 41        | 20        | 26        | 16        | 12        | 33        | 40        |
| K00626   | 5         | 1         | 0         | 2         | 4         | 4         | 1         | 3         | 1         | 6         | 2         | 0         | 1         | 3         | 4         | 4         |
| K00632   | 0         | 0         | 0         | 0         | 0         | 0         | 0         | 0         | 0         | 0         | 1         | 0         | 0         | 0         | 0         | 0         |
| K00680   | 28        | 16        | 17        | 29        | 24        | 19        | 18        | 13        | 11        | 45        | 21        | 28        | 17        | 20        | 32        | 27        |
| K00757   | 13        | 5         | 5         | 7         | 7         | 4         | 6         | 5         | 3         | 11        | 8         | 5         | 6         | 4         | 9         | 4         |
| K00758   | 1         | 0         | 0         | 1         | 3         | 2         | 1         | 1         | 0         | 1         | 2         | 0         | 1         | 0         | 0         | 1         |
| K00760   | 12        | 6         | 10        | 12        | 15        | 6         | 6         | 10        | 5         | 22        | 8         | 12        | 4         | 10        | 10        | 14        |
| K00799   | 0         | 0         | 0         | 4         | 0         | 0         | 0         | 1         | 0         | 0         | 1         | 0         | 0         | 0         | 0         | 0         |
| K00857   | 6         | 3         | 6         | 6         | 5         | 7         | 4         | 9         | 5         | 10        | 6         | 11        | 6         | 3         | 6         | 6         |
| K00876   | 22        | 13        | 13        | 16        | 20        | 13        | 8         | 16        | 11        | 26        | 20        | 16        | 9         | 13        | 21        | 21        |
| K01026   | 2         | 0         | 0         | 0         | 1         | 0         | 0         | 0         | 0         | 0         | 0         | 0         | 0         | 0         | 1         | 0         |
| K01031   | 0         | 0         | 0         | 0         | 0         | 0         | 0         | 0         | 0         | 0         | 0         | 0         | 0         | 0         | 0         | 0         |



| EC/KO  | CH-DOM022 | CH-DOM023 | CH-DOM024 | CH-DOM025 | CH-DOM026 | CH-NLF001 | CH-NLF002 | CH-NLF005 | CH-NLF006 | CH-NLF007 | CH-NLF008 | CH-NLF009 | CH-NLF010 | CH-NLF011 | CH-NLF012 | CH-NLF013 |
|--------|-----------|-----------|-----------|-----------|-----------|-----------|-----------|-----------|-----------|-----------|-----------|-----------|-----------|-----------|-----------|-----------|
| K01034 | 0         | 1         | 0         | 2         | 0         | 0         | 0         | 1         | 0         | 0         | 2         | 1         | 0         | 0         | 0         | 0         |
| K01039 | 1         | 0         | 0         | 1         | 0         | 0         | 0         | 0         | 0         | 0         | 0         | 0         | 0         | 0         | 0         | 0         |
| K01041 | 7         | 5         | 7         | 4         | 3         | 3         | 4         | 7         | 4         | 10        | 8         | 5         | 5         | 7         | 5         | 6         |
| K01053 | 0         | 0         | 0         | 1         | 0         | 0         | 0         | 0         | 0         | 0         | 0         | 0         | 0         | 0         | 0         | 0         |
| K01055 | 0         | 0         | 0         | 0         | 0         | 0         | 0         | 0         | 0         | 0         | 0         | 0         | 0         | 0         | 0         | 0         |
| K01061 | 0         | 0         | 0         | 2         | 0         | 0         | 0         | 0         | 0         | 0         | 1         | 0         | 0         | 0         | 0         | 0         |
| K01066 | 4         | 2         | 3         | 3         | 8         | 2         | 4         | 1         | 1         | 3         | 6         | 4         | 1         | 2         | 2         | 4         |
| K01075 | 1         | 0         | 0         | 1         | 0         | 0         | 0         | 1         | 0         | 1         | 1         | 0         | 0         | 0         | 0         | 2         |
| K01077 | 9         | 6         | 8         | 7         | 7         | 5         | 4         | 3         | 0         | 5         | 13        | 9         | 5         | 6         | 10        | 9         |
| K01101 | 0         | 0         | 1         | 2         | 3         | 1         | 2         | 0         | 0         | 1         | 2         | 0         | 0         | 1         | 3         | 0         |
| K01195 | 5         | 1         | 2         | 4         | 7         | 6         | 7         | 4         | 0         | 9         | 4         | 6         | 5         | 5         | 5         | 9         |
| K01426 | 1         | 1         | 0         | 0         | 0         | 0         | 0         | 0         | 0         | 0         | 2         | 0         | 0         | 0         | 1         | 0         |
| K01428 | 0         | 0         | 1         | 0         | 1         | 0         | 0         | 1         | 0         | 1         | 0         | 0         | 1         | 0         | 1         | 0         |
| K01457 | 0         | 0         | 0         | 0         | 0         | 0         | 0         | 0         | 0         | 0         | 0         | 0         | 0         | 0         | 0         | 0         |
| K01464 | 3         | 0         | 0         | 0         | 4         | 0         | 0         | 0         | 0         | 1         | 2         | 0         | 0         | 1         | 1         | 0         |
| K01489 | 12        | 5         | 6         | 9         | 8         | 5         | 8         | 11        | 6         | 17        | 9         | 15        | 6         | 6         | 10        | 15        |
| K01500 | 0         | 0         | 0         | 0         | 0         | 0         | 0         | 0         | 0         | 0         | 0         | 0         | 0         | 0         | 0         | 0         |
| K01501 | 1         | 0         | 0         | 0         | 0         | 0         | 0         | 0         | 0         | 0         | 1         | 0         | 0         | 0         | 0         | 1         |
| K01502 | 0         | 0         | 0         | 0         | 0         | 0         | 0         | 0         | 0         | 0         | 0         | 0         | 0         | 0         | 0         | 0         |
| K01512 | 6         | 0         | 0         | 1         | 7         | 2         | 1         | 2         | 2         | 8         | 2         | 4         | 1         | 2         | 5         | 5         |
| K01560 | 0         | 0         | 0         | 2         | 4         | 2         | 2         | 0         | 0         | 3         | 1         | 1         | 1         | 2         | 1         | 2         |
| K01561 | 1         | 0         | 0         | 0         | 0         | 1         | 0         | 0         | 0         | 0         | 1         | 0         | 0         | 0         | 1         | 0         |
| K01563 | 0         | 0         | 0         | 0         | 0         | 0         | 0         | 0         | 0         | 0         | 0         | 0         | 0         | 0         | 0         | 0         |
| K01564 | 0         | 2         | 0         | 1         | 0         | 2         | 1         | 0         | 0         | 0         | 4         | 1         | 0         | 0         | 2         | 0         |
| K01607 | 10        | 4         | 5         | 6         | 7         | 4         | 5         | 6         | 4         | 12        | 4         | 5         | 5         | 2         | 8         | 10        |
| K01612 | 0         | 0         | 0         | 0         | 0         | 0         | 0         | 0         | 0         | 0         | 0         | 0         | 0         | 0         | 0         | 0         |
| K01615 | 11        | 12        | 11        | 12        | 8         | 5         | 8         | 10        | 5         | 21        | 14        | 16        | 7         | 11        | 13        | 17        |
| K01617 | 0         | 0         | 0         | 0         | 0         | 0         | 0         | 0         | 0         | 0         | 0         | 0         | 0         | 0         | 0         | 0         |
| K01666 | 1         | 2         | 5         | 1         | 5         | 4         | 3         | 5         | 1         | 11        | 0         | 3         | 1         | 6         | 5         | 11        |
| K01692 | 0         | 0         | 0         | 0         | 0         | 0         | 0         | 0         | 0         | 0         | 0         | 0         | 0         | 0         | 0         | 0         |
| K01721 | 0         | 0         | 0         | 0         | 0         | 0         | 0         | 0         | 0         | 0         | 0         | 0         | 0         | 0         | 0         | 0         |
| K01726 | 8         | 5         | 6         | 3         | 4         | 5         | 8         | 4         | 3         | 5         | 8         | 7         | 5         | 4         | 2         | 3         |
| K01781 | 0         | 0         | 0         | 0         | 0         | 0         | 0         | 0         | 0         | 0         | 0         | 0         | 0         | 0         | 0         | 1         |
| K01821 | 4         | 1         | 0         | 2         | 0         | 1         | 1         | 1         | 1         | 0         | 1         | 3         | 0         | 0         | 2         | 2         |
| K01856 | 0         | 0         | 0         | 0         | 0         | 0         | 0         | 0         | 0         | 0         | 0         | 0         | 0         | 0         | 0         | 0         |
| K01857 | 0         | 0         | 0         | 0         | 0         | 0         | 0         | 0         | 0         | 0         | 1         | 0         | 0         | 0         | 0         | 0         |
| K01913 | 0         | 0         | 0         | 0         | 0         | 0         | 0         | 0         | 0         | 1         | 0         | 0         | 0         | 0         | 1         | 0         |
| K01951 | 22        | 6         | 7         | 12        | 14        | 7         | 9         | 11        | 4         | 18        | 16        | 8         | 4         | 9         | 18        | 16        |
| K02554 | 0         | 0         | 0         | 0         | 0         | 0         | 0         | 0         | 0         | 0         | 0         | 0         | 0         | 0         | 0         | 0         |
| K03381 | 0         | 0         | 0         | 1         | 0         | 0         | 0         | 0         | 0         | 0         | 0         | 0         | 0         | 0         | 0         | 0         |
| K03382 | 2         | 0         | 0         | 0         | 0         | 0         | 0         | 0         | 0         | 0         | 0         | 0         | 0         | 0         | 0         | 0         |
| K03464 | 0         | 0         | 0         | 0         | 0         | 0         | 0         | 0         | 0         | 0         | 0         | 0         | 0         | 0         | 0         | 0         |
| K03518 | 17        | 2         | 3         | 4         | 12        | 4         | 4         | 3         | 1         | 6         | 4         | 2         | 3         | 2         | 5         | 7         |
| K03862 | 0         | 0         | 0         | 0         | 0         | 0         | 0         | 0         | 0         | 0         | 0         | 0         | 0         | 0         | 0         | 0         |
| K04099 | 0         | 0         | 0         | 1         | 0         | 0         | 0         | 0         | 0         | 0         | 0         | 0         | 0         | 0         | 0         | 0         |
| K04100 | 0         | 0         | 0         | 0         | 0         | 0         | 0         | 0         | 0         | 0         | 0         | 0         | 0         | 0         | 0         | 0         |
| K04102 | 0         | 0         | 0         | 0         | 0         | 0         | 0         | 0         | 0         | 0         | 0         | 0         | 0         | 0         | 0         | 0         |
| K04116 | 0         | 0         | 0         | 0         | 0         | 0         | 0         | 0         | 0         | 0         | 0         | 0         | 0         | 0         | 0         | 0         |
| K05394 | 1         | 0         | 0         | 0         | 0         | 0         | 0         | 0         | 0         | 0         | 0         | 0         | 0         | 0         | 0         | 1         |

| EC/KO  | CH-DOM022 | CH-DOM023 | CH-DOM024 | CH-DOM025 | CH-DOM026 | CH-NLF001 | CH-NLF002 | CH-NLF005 | CH-NLF006 | CH-NLF007 | CH-NLF008 | CH-NLF009 | CH-NLF010 | CH-NLF011 | CH-NLF012 | CH-NLF013 |
|--------|-----------|-----------|-----------|-----------|-----------|-----------|-----------|-----------|-----------|-----------|-----------|-----------|-----------|-----------|-----------|-----------|
| K05549 | 0         | 0         | 0         | 1         | 0         | 0         | 0         | 0         | 0         | 0         | 0         | 0         | 0         | 0         | 0         | 0         |
| K05783 | 0         | 0         | 0         | 0         | 0         | 0         | 0         | 0         | 0         | 0         | 0         | 0         | 0         | 0         | 0         | 0         |
| K05797 | 0         | 0         | 0         | 0         | 0         | 0         | 0         | 0         | 0         | 0         | 0         | 0         | 0         | 0         | 0         | 0         |
| K06281 | 4         | 1         | 1         | 0         | 0         | 1         | 1         | 0         | 0         | 1         | 4         | 0         | 1         | 0         | 0         | 1         |
| K06446 | 3         | 1         | 1         | 3         | 1         | 6         | 5         | 4         | 1         | 3         | 3         | 2         | 0         | 2         | 7         | 4         |
| K06912 | 0         | 0         | 0         | 0         | 0         | 0         | 0         | 0         | 0         | 0         | 0         | 0         | 0         | 0         | 0         | 0         |
| K07535 | 0         | 0         | 0         | 0         | 0         | 0         | 0         | 0         | 0         | 0         | 0         | 0         | 0         | 0         | 0         | 0         |
| K07536 | 6         | 2         | 1         | 1         | 2         | 1         | 2         | 1         | 1         | 2         | 3         | 2         | 1         | 1         | 0         | 1         |
| K08689 | 0         | 0         | 0         | 0         | 0         | 0         | 0         | 0         | 0         | 0         | 0         | 0         | 0         | 0         | 0         | 0         |
| K08710 | 0         | 0         | 0         | 0         | 0         | 0         | 0         | 0         | 0         | 0         | 0         | 0         | 0         | 0         | 0         | 0         |
| K09461 | 0         | 0         | 0         | 0         | 0         | 0         | 0         | 0         | 0         | 0         | 0         | 0         | 0         | 0         | 0         | 0         |
| K10217 | 0         | 0         | 0         | 0         | 0         | 0         | 0         | 0         | 0         | 0         | 0         | 0         | 0         | 0         | 0         | 0         |
| K10218 | 2         | 0         | 0         | 1         | 0         | 0         | 0         | 0         | 0         | 0         | 0         | 0         | 0         | 0         | 0         | 0         |
| K10220 | 0         | 0         | 0         | 0         | 0         | 0         | 0         | 0         | 0         | 0         | 0         | 0         | 0         | 0         | 0         | 0         |
| K11180 | 1         | 0         | 0         | 0         | 0         | 0         | 0         | 0         | 0         | 0         | 0         | 0         | 0         | 0         | 0         | 0         |
| K13953 | 1         | 0         | 0         | 1         | 0         | 0         | 0         | 0         | 0         | 0         | 1         | 0         | 0         | 0         | 0         | 0         |
| K14333 | 0         | 0         | 0         | 1         | 0         | 0         | 0         | 0         | 0         | 0         | 0         | 0         | 0         | 0         | 0         | 0         |
| K14519 | 0         | 0         | 0         | 0         | 0         | 0         | 0         | 0         | 0         | 0         | 0         | 0         | 0         | 0         | 0         | 0         |
| K15054 | 0         | 0         | 0         | 1         | 0         | 0         | 0         | 0         | 0         | 0         | 0         | 0         | 0         | 0         | 0         | 0         |
| K16173 | 1         | 0         | 0         | 0         | 0         | 0         | 0         | 0         | 0         | 0         | 0         | 0         | 0         | 0         | 1         | 0         |
| K16514 | 0         | 0         | 0         | 0         | 0         | 0         | 0         | 0         | 0         | 0         | 1         | 0         | 0         | 0         | 0         | 0         |
| K16874 | 0         | 0         | 0         | 0         | 0         | 0         | 0         | 0         | 0         | 0         | 0         | 0         | 0         | 0         | 0         | 0         |

| EC/KO       | CH-NLF014 | CH-NLF015 | CH-NLM001 | CH-NLM002 | CH-NLM003 | CH-NLM004 | CH-NLM005 | CH-NLM006 | CH-NLM007 | CH-NLM008 | CH-NLM009 | CH-NLM010 | CH-NLM015 | CH-NLM016 | CH-NLM017 | CH-NLM021 |
|-------------|-----------|-----------|-----------|-----------|-----------|-----------|-----------|-----------|-----------|-----------|-----------|-----------|-----------|-----------|-----------|-----------|
| 1.1.1.-     | 24        | 43        | 20        | 31        | 11        | 36        | 16        | 57        | 34        | 25        | 17        | 44        | 31        | 5         | 40        | 52        |
| 1.1.1.1     | 11        | 24        | 21        | 25        | 14        | 42        | 8         | 41        | 25        | 20        | 9         | 35        | 19        | 7         | 29        | 50        |
| 1.1.1.157   | 0         | 0         | 0         | 0         | 0         | 2         | 0         | 0         | 0         | 0         | 0         | 2         | 0         | 0         | 1         | 0         |
| 1.1.1.205   | 8         | 16        | 10        | 11        | 4         | 21        | 5         | 19        | 17        | 12        | 12        | 26        | 13        | 3         | 19        | 29        |
| 1.1.1.35    | 0         | 1         | 0         | 0         | 1         | 0         | 0         | 2         | 2         | 0         | 1         | 2         | 2         | 0         | 0         | 2         |
| 1.1.2.99.6  | 0         | 1         | 0         | 2         | 0         | 0         | 0         | 7         | 2         | 0         | 0         | 2         | 2         | 0         | 2         | 1         |
| 1.1.3.11.-  | 0         | 0         | 0         | 0         | 0         | 0         | 0         | 0         | 0         | 0         | 0         | 0         | 0         | 0         | 0         | 0         |
| 1.1.3.11.1  | 0         | 0         | 0         | 0         | 0         | 0         | 0         | 0         | 0         | 0         | 0         | 0         | 0         | 0         | 0         | 0         |
| 1.1.3.11.2  | 0         | 0         | 0         | 0         | 0         | 0         | 0         | 0         | 0         | 0         | 0         | 0         | 0         | 0         | 0         | 0         |
| 1.1.3.11.3  | 0         | 0         | 0         | 0         | 0         | 0         | 0         | 0         | 0         | 0         | 0         | 0         | 0         | 0         | 0         | 0         |
| 1.1.3.11.39 | 0         | 0         | 0         | 0         | 0         | 0         | 0         | 0         | 0         | 0         | 0         | 0         | 0         | 0         | 0         | 0         |
| 1.1.3.11.5  | 0         | 0         | 0         | 0         | 0         | 0         | 0         | 0         | 0         | 0         | 0         | 0         | 0         | 0         | 0         | 1         |
| 1.1.3.11.8  | 0         | 0         | 0         | 0         | 0         | 0         | 0         | 2         | 0         | 0         | 0         | 0         | 0         | 0         | 0         | 0         |
| 1.1.4.12.10 | 0         | 0         | 0         | 1         | 1         | 0         | 0         | 3         | 0         | 0         | 0         | 0         | 1         | 0         | 0         | 0         |
| 1.1.4.12.13 | 0         | 0         | 0         | 0         | 0         | 0         | 0         | 1         | 0         | 0         | 0         | 0         | 0         | 0         | 0         | 0         |
| 1.1.4.12.18 | 0         | 0         | 0         | 0         | 0         | 0         | 0         | 0         | 0         | 0         | 0         | 0         | 0         | 0         | 0         | 0         |
| 1.1.4.13.-  | 0         | 0         | 0         | 3         | 0         | 0         | 0         | 2         | 0         | 0         | 0         | 0         | 2         | 0         | 0         | 0         |
| 1.1.4.13.1  | 0         | 0         | 0         | 0         | 0         | 0         | 0         | 0         | 0         | 0         | 0         | 0         | 0         | 0         | 0         | 0         |
| 1.1.4.13.2  | 0         | 0         | 0         | 0         | 0         | 0         | 0         | 0         | 0         | 0         | 0         | 0         | 0         | 0         | 0         | 0         |
| 1.1.4.13.50 | 0         | 0         | 0         | 0         | 0         | 0         | 0         | 0         | 0         | 0         | 0         | 0         | 0         | 0         | 0         | 0         |
| 1.1.4.13.7  | 1         | 0         | 0         | 0         | 0         | 1         | 0         | 1         | 0         | 1         | 0         | 0         | 0         | 0         | 0         | 0         |
| 1.1.4.13.8  | 0         | 0         | 0         | 0         | 0         | 0         | 0         | 0         | 0         | 0         | 0         | 0         | 0         | 0         | 0         | 0         |
| 1.1.4.13.82 | 0         | 0         | 0         | 0         | 0         | 0         | 0         | 0         | 0         | 0         | 0         | 0         | 0         | 0         | 0         | 0         |
| 1.1.4.99.-  | 0         | 0         | 0         | 0         | 0         | 0         | 0         | 0         | 0         | 0         | 0         | 0         | 0         | 0         | 0         | 0         |
| 1.1.7.99.1  | 0         | 0         | 0         | 0         | 0         | 0         | 0         | 0         | 0         | 0         | 0         | 0         | 0         | 0         | 0         | 0         |
| 1.1.8.6.1   | 0         | 0         | 0         | 0         | 0         | 0         | 0         | 0         | 0         | 0         | 0         | 0         | 1         | 0         | 0         | 0         |
| 1.2.1.-     | 0         | 0         | 0         | 1         | 0         | 0         | 0         | 1         | 0         | 0         | 0         | 0         | 0         | 0         | 0         | 0         |
| 1.2.1.10    | 0         | 3         | 1         | 3         | 0         | 6         | 2         | 4         | 3         | 5         | 2         | 5         | 2         | 1         | 6         | 6         |
| 1.2.1.13    | 2         | 3         | 3         | 4         | 2         | 9         | 0         | 4         | 5         | 5         | 1         | 6         | 4         | 1         | 7         | 5         |
| 1.2.1.139   | 0         | 0         | 0         | 1         | 0         | 0         | 0         | 0         | 0         | 0         | 0         | 0         | 0         | 0         | 0         | 0         |
| 1.2.7.1     | 5         | 8         | 7         | 5         | 2         | 9         | 3         | 7         | 4         | 4         | 2         | 10        | 5         | 4         | 7         | 16        |
| 1.2.99.2    | 0         | 2         | 4         | 4         | 3         | 4         | 0         | 2         | 3         | 2         | 0         | 1         | 4         | 1         | 4         | 2         |
| 1.3.1.-     | 0         | 0         | 0         | 1         | 0         | 0         | 1         | 1         | 1         | 0         | 0         | 0         | 0         | 1         | 0         | 0         |
| 1.3.1.2     | 0         | 0         | 0         | 1         | 0         | 0         | 0         | 1         | 1         | 0         | 0         | 1         | 0         | 0         | 0         | 0         |
| 1.3.1.25    | 0         | 0         | 0         | 0         | 0         | 0         | 0         | 0         | 0         | 0         | 0         | 0         | 0         | 0         | 0         | 0         |
| 1.3.99.-    | 0         | 0         | 0         | 0         | 0         | 0         | 0         | 0         | 0         | 0         | 0         | 0         | 0         | 0         | 0         | 0         |
| 1.6.5.-     | 27        | 29        | 15        | 19        | 8         | 33        | 15        | 63        | 36        | 21        | 11        | 44        | 19        | 12        | 38        | 50        |
| 1.7.1.-     | 9         | 7         | 6         | 5         | 2         | 9         | 5         | 16        | 6         | 5         | 6         | 10        | 6         | 3         | 8         | 5         |
| 1.8.99.3    | 0         | 0         | 1         | 0         | 0         | 1         | 0         | 0         | 1         | 0         | 0         | 0         | 0         | 0         | 0         | 0         |
| 2.1.1.-     | 82        | 132       | 96        | 107       | 48        | 195       | 69        | 236       | 150       | 111       | 75        | 200       | 101       | 47        | 160       | 256       |
| 2.3.1.-     | 82        | 96        | 62        | 64        | 45        | 93        | 68        | 171       | 78        | 64        | 39        | 139       | 70        | 21        | 113       | 157       |
| 2.3.1.16    | 0         | 4         | 3         | 2         | 0         | 2         | 0         | 0         | 1         | 0         | 0         | 2         | 1         | 0         | 1         | 4         |
| 2.3.1.5     | 0         | 0         | 0         | 0         | 0         | 0         | 0         | 0         | 0         | 0         | 0         | 0         | 1         | 0         | 0         | 0         |
| 2.3.1.9     | 0         | 1         | 0         | 3         | 2         | 1         | 0         | 2         | 0         | 1         | 1         | 1         | 2         | 1         | 0         | 1         |
| 2.4.2.10    | 6         | 7         | 3         | 7         | 3         | 13        | 2         | 12        | 9         | 3         | 4         | 14        | 4         | 2         | 6         | 21        |
| 2.4.2.3     | 2         | 2         | 3         | 4         | 0         | 11        | 3         | 5         | 4         | 3         | 4         | 5         | 1         | 0         | 7         | 14        |
| 2.4.2.4     | 0         | 2         | 1         | 0         | 1         | 2         | 0         | 1         | 1         | 0         | 0         | 3         | 3         | 1         | 0         | 4         |
| 2.4.2.8     | 4         | 5         | 7         | 6         | 1         | 13        | 6         | 14        | 7         | 4         | 4         | 11        | 5         | 4         | 14        | 11        |
| 2.5.1.-     | 9         | 11        | 13        | 11        | 6         | 14        | 11        | 40        | 15        | 8         | 11        | 19        | 10        | 5         | 15        | 20        |

| EC/KO    | CH-NLF014 | CH-NLF015 | CH-NLM001 | CH-NLM002 | CH-NLM003 | CH-NLM004 | CH-NLM005 | CH-NLM006 | CH-NLM007 | CH-NLM008 | CH-NLM009 | CH-NLM010 | CH-NLM015 | CH-NLM016 | CH-NLM017 | CH-NLM021 |
|----------|-----------|-----------|-----------|-----------|-----------|-----------|-----------|-----------|-----------|-----------|-----------|-----------|-----------|-----------|-----------|-----------|
| 2.5.1.18 | 0         | 1         | 2         | 4         | 6         | 1         | 0         | 10        | 2         | 0         | 0         | 0         | 5         | 0         | 0         | 0         |
| 2.6.1.-  | 15        | 27        | 21        | 12        | 5         | 20        | 13        | 40        | 15        | 12        | 13        | 32        | 14        | 7         | 29        | 33        |
| 2.7.1.21 | 5         | 3         | 6         | 5         | 2         | 2         | 1         | 13        | 5         | 2         | 1         | 4         | 2         | 0         | 5         | 7         |
| 2.7.1.48 | 13        | 19        | 11        | 12        | 7         | 15        | 9         | 29        | 15        | 13        | 10        | 28        | 11        | 3         | 20        | 23        |
| 2.7.4.-  | 6         | 10        | 7         | 7         | 2         | 14        | 6         | 15        | 8         | 8         | 7         | 10        | 5         | 4         | 13        | 17        |
| 2.8.3.-  | 1         | 1         | 2         | 1         | 1         | 1         | 0         | 5         | 2         | 0         | 0         | 2         | 1         | 0         | 3         | 1         |
| 2.8.3.1  | 0         | 0         | 0         | 0         | 0         | 0         | 0         | 1         | 0         | 0         | 0         | 0         | 0         | 1         | 0         | 0         |
| 2.8.3.12 | 0         | 1         | 0         | 0         | 0         | 0         | 0         | 0         | 0         | 0         | 0         | 0         | 0         | 0         | 2         | 1         |
| 2.8.3.6  | 1         | 0         | 0         | 0         | 0         | 0         | 0         | 1         | 0         | 0         | 0         | 0         | 1         | 0         | 0         | 0         |
| 2.8.3.8  | 0         | 1         | 1         | 2         | 3         | 3         | 1         | 3         | 0         | 0         | 0         | 1         | 2         | 0         | 2         | 1         |
| 3.1.1.-  | 2         | 4         | 4         | 8         | 2         | 3         | 2         | 11        | 6         | 1         | 0         | 3         | 5         | 1         | 6         | 2         |
| 3.1.1.1  | 6         | 4         | 4         | 1         | 4         | 1         | 3         | 6         | 6         | 4         | 0         | 9         | 2         | 0         | 8         | 4         |
| 3.1.1.17 | 1         | 2         | 3         | 0         | 2         | 0         | 1         | 0         | 1         | 0         | 0         | 1         | 0         | 0         | 3         | 1         |
| 3.1.1.2  | 0         | 0         | 0         | 1         | 1         | 0         | 0         | 2         | 0         | 0         | 0         | 0         | 1         | 0         | 0         | 0         |
| 3.1.1.24 | 0         | 0         | 2         | 2         | 1         | 2         | 0         | 3         | 2         | 0         | 1         | 0         | 2         | 1         | 1         | 3         |
| 3.1.1.45 | 0         | 1         | 0         | 0         | 0         | 0         | 0         | 2         | 0         | 0         | 0         | 0         | 1         | 0         | 0         | 0         |
| 3.1.2.-  | 0         | 1         | 1         | 1         | 2         | 0         | 1         | 2         | 3         | 0         | 0         | 1         | 2         | 0         | 0         | 0         |
| 3.1.2.23 | 5         | 4         | 2         | 1         | 1         | 0         | 4         | 10        | 2         | 1         | 3         | 5         | 2         | 1         | 6         | 5         |
| 3.1.3.1  | 11        | 17        | 12        | 9         | 5         | 3         | 4         | 23        | 18        | 10        | 8         | 18        | 10        | 2         | 19        | 17        |
| 3.1.3.2  | 5         | 6         | 5         | 8         | 4         | 6         | 3         | 10        | 7         | 4         | 4         | 5         | 6         | 1         | 5         | 6         |
| 3.1.3.41 | 0         | 0         | 0         | 0         | 0         | 0         | 0         | 0         | 0         | 0         | 0         | 0         | 0         | 0         | 0         | 0         |
| 3.2.1.31 | 1         | 1         | 2         | 0         | 1         | 1         | 1         | 4         | 1         | 1         | 2         | 3         | 1         | 0         | 1         | 5         |
| 3.3.2.9  | 0         | 0         | 0         | 0         | 0         | 0         | 0         | 0         | 0         | 0         | 0         | 0         | 0         | 0         | 0         | 0         |
| 3.5.1.-  | 3         | 8         | 10        | 8         | 1         | 24        | 6         | 21        | 14        | 7         | 9         | 14        | 6         | 5         | 11        | 21        |
| 3.5.1.4  | 1         | 1         | 1         | 2         | 0         | 2         | 1         | 4         | 1         | 0         | 1         | 2         | 1         | 1         | 1         | 3         |
| 3.5.1.5  | 0         | 0         | 0         | 0         | 1         | 2         | 0         | 1         | 0         | 0         | 0         | 2         | 0         | 0         | 1         | 1         |
| 3.5.1.54 | 0         | 2         | 0         | 2         | 1         | 3         | 0         | 3         | 2         | 1         | 1         | 1         | 1         | 0         | 2         | 5         |
| 3.5.1.6  | 1         | 1         | 0         | 2         | 0         | 2         | 1         | 0         | 1         | 0         | 0         | 2         | 1         | 0         | 0         | 1         |
| 3.5.2.-  | 0         | 0         | 0         | 1         | 0         | 1         | 0         | 0         | 0         | 0         | 0         | 0         | 0         | 0         | 0         | 0         |
| 3.5.2.2  | 0         | 0         | 0         | 1         | 0         | 3         | 0         | 2         | 2         | 0         | 1         | 0         | 0         | 0         | 0         | 1         |
| 3.5.4.-  | 8         | 7         | 10        | 11        | 4         | 20        | 6         | 22        | 11        | 10        | 9         | 14        | 9         | 3         | 16        | 13        |
| 3.5.4.5  | 6         | 8         | 6         | 4         | 3         | 6         | 3         | 10        | 4         | 4         | 4         | 10        | 5         | 1         | 7         | 14        |
| 3.5.5.1  | 0         | 1         | 0         | 1         | 1         | 1         | 0         | 1         | 3         | 0         | 0         | 0         | 0         | 0         | 1         | 2         |
| 3.5.5.7  | 0         | 0         | 0         | 0         | 0         | 0         | 0         | 0         | 0         | 0         | 0         | 0         | 0         | 0         | 0         | 0         |
| 3.5.99.3 | 0         | 0         | 0         | 0         | 0         | 0         | 0         | 0         | 0         | 0         | 0         | 0         | 0         | 0         | 0         | 0         |
| 3.6.1.7  | 0         | 0         | 1         | 3         | 1         | 7         | 0         | 2         | 3         | 3         | 2         | 3         | 2         | 0         | 2         | 4         |
| 3.7.1.-  | 0         | 0         | 0         | 1         | 1         | 0         | 0         | 2         | 0         | 0         | 0         | 0         | 2         | 1         | 0         | 0         |
| 3.7.1.2  | 5         | 2         | 2         | 2         | 2         | 0         | 2         | 11        | 2         | 1         | 1         | 6         | 3         | 0         | 4         | 4         |
| 3.8.1.2  | 6         | 6         | 2         | 3         | 3         | 5         | 2         | 9         | 8         | 2         | 2         | 6         | 3         | 1         | 9         | 4         |
| 3.8.1.3  | 0         | 0         | 0         | 0         | 0         | 0         | 0         | 0         | 0         | 0         | 0         | 0         | 0         | 0         | 0         | 0         |
| 3.8.1.5  | 0         | 0         | 0         | 0         | 0         | 0         | 0         | 2         | 1         | 0         | 0         | 0         | 0         | 0         | 1         | 0         |
| 4.1.1.-  | 7         | 13        | 4         | 12        | 4         | 5         | 5         | 20        | 5         | 5         | 4         | 10        | 6         | 5         | 9         | 10        |
| 4.1.1.44 | 10        | 12        | 6         | 8         | 6         | 16        | 11        | 28        | 12        | 12        | 10        | 19        | 10        | 3         | 20        | 20        |
| 4.1.1.55 | 0         | 0         | 0         | 0         | 0         | 0         | 0         | 0         | 0         | 0         | 0         | 0         | 0         | 0         | 0         | 0         |
| 4.1.1.7  | 0         | 0         | 0         | 0         | 0         | 0         | 0         | 1         | 0         | 0         | 0         | 0         | 0         | 0         | 0         | 0         |
| 4.1.1.70 | 0         | 0         | 0         | 0         | 0         | 0         | 0         | 0         | 0         | 0         | 0         | 0         | 0         | 0         | 0         | 1         |
| 4.1.1.77 | 0         | 0         | 0         | 0         | 0         | 0         | 0         | 0         | 0         | 0         | 0         | 0         | 0         | 0         | 0         | 0         |
| 4.1.2.-  | 1         | 6         | 3         | 7         | 3         | 1         | 1         | 7         | 7         | 1         | 1         | 5         | 5         | 1         | 3         | 6         |
| 4.1.3.-  | 6         | 11        | 10        | 7         | 2         | 12        | 7         | 21        | 11        | 7         | 3         | 18        | 8         | 3         | 9         | 19        |

| EC/KO    | CH-NLF014 | CH-NLF015 | CH-NLM001 | CH-NLM002 | CH-NLM003 | CH-NLM004 | CH-NLM005 | CH-NLM006 | CH-NLM007 | CH-NLM008 | CH-NLM009 | CH-NLM010 | CH-NLM015 | CH-NLM016 | CH-NLM017 | CH-NLM021 |
|----------|-----------|-----------|-----------|-----------|-----------|-----------|-----------|-----------|-----------|-----------|-----------|-----------|-----------|-----------|-----------|-----------|
| 4.1.3.39 | 1         | 0         | 0         | 1         | 0         | 1         | 1         | 1         | 0         | 0         | 0         | 1         | 0         | 0         | 0         | 0         |
| 4.1.99.- | 0         | 1         | 0         | 0         | 0         | 2         | 0         | 2         | 0         | 0         | 1         | 1         | 1         | 0         | 0         | 2         |
| 4.2.1.-  | 16        | 38        | 19        | 15        | 16        | 24        | 17        | 50        | 35        | 19        | 18        | 57        | 21        | 7         | 50        | 56        |
| 4.2.1.17 | 3         | 5         | 1         | 5         | 2         | 3         | 3         | 9         | 3         | 6         | 5         | 3         | 3         | 1         | 4         | 7         |
| 4.2.1.80 | 0         | 0         | 0         | 0         | 0         | 0         | 0         | 0         | 0         | 0         | 0         | 0         | 0         | 0         | 0         | 0         |
| 4.2.1.83 | 0         | 0         | 1         | 0         | 0         | 1         | 1         | 0         | 0         | 0         | 0         | 1         | 0         | 0         | 0         | 1         |
| 4.2.1.84 | 0         | 0         | 0         | 0         | 0         | 1         | 0         | 0         | 0         | 0         | 1         | 0         | 0         | 0         | 0         | 1         |
| 5.1.2.2  | 0         | 0         | 0         | 0         | 0         | 0         | 0         | 0         | 0         | 0         | 0         | 0         | 0         | 0         | 0         | 0         |
| 5.2.1.2  | 0         | 0         | 0         | 0         | 0         | 0         | 0         | 0         | 0         | 0         | 0         | 0         | 0         | 0         | 0         | 0         |
| 5.3.3.4  | 0         | 0         | 1         | 0         | 0         | 0         | 0         | 0         | 0         | 0         | 0         | 1         | 0         | 0         | 1         | 0         |
| 5.3.99.- | 0         | 3         | 1         | 0         | 0         | 3         | 1         | 0         | 3         | 0         | 0         | 0         | 2         | 0         | 3         | 2         |
| 5.4.99.- | 0         | 0         | 0         | 1         | 0         | 1         | 0         | 1         | 0         | 0         | 0         | 0         | 1         | 0         | 0         | 0         |
| 5.5.1.1  | 5         | 5         | 1         | 0         | 1         | 0         | 2         | 4         | 3         | 2         | 1         | 6         | 0         | 0         | 7         | 3         |
| 5.5.1.2  | 0         | 0         | 0         | 0         | 0         | 0         | 0         | 0         | 0         | 0         | 0         | 0         | 0         | 0         | 0         | 0         |
| 6.2.1.-  | 0         | 0         | 0         | 0         | 0         | 0         | 0         | 0         | 0         | 0         | 0         | 0         | 0         | 0         | 0         | 0         |
| 6.3.5.2  | 7         | 18        | 11        | 14        | 4         | 15        | 8         | 19        | 14        | 8         | 9         | 18        | 7         | 3         | 14        | 25        |
| K00002   | 0         | 0         | 0         | 0         | 0         | 0         | 0         | 0         | 3         | 0         | 0         | 0         | 0         | 0         | 1         | 1         |
| K00055   | 0         | 0         | 0         | 0         | 0         | 0         | 0         | 0         | 0         | 0         | 0         | 0         | 0         | 0         | 0         | 0         |
| K00074   | 0         | 1         | 3         | 0         | 0         | 6         | 2         | 0         | 2         | 0         | 3         | 6         | 2         | 0         | 1         | 5         |
| K00088   | 7         | 13        | 8         | 11        | 3         | 13        | 5         | 14        | 13        | 9         | 6         | 22        | 9         | 3         | 13        | 21        |
| K00100   | 21        | 38        | 19        | 24        | 12        | 32        | 18        | 68        | 35        | 17        | 10        | 51        | 23        | 10        | 40        | 49        |
| K00128   | 0         | 0         | 0         | 1         | 1         | 4         | 0         | 4         | 1         | 0         | 0         | 2         | 1         | 0         | 1         | 2         |
| K00129   | 0         | 0         | 0         | 0         | 0         | 0         | 0         | 0         | 0         | 0         | 0         | 0         | 0         | 0         | 0         | 0         |
| K00132   | 0         | 0         | 0         | 0         | 0         | 0         | 0         | 0         | 0         | 0         | 0         | 0         | 0         | 0         | 0         | 0         |
| K00141   | 0         | 0         | 0         | 0         | 0         | 0         | 0         | 0         | 0         | 0         | 0         | 0         | 0         | 0         | 0         | 0         |
| K00146   | 0         | 0         | 0         | 1         | 0         | 0         | 0         | 0         | 0         | 0         | 0         | 0         | 1         | 0         | 0         | 0         |
| K00148   | 0         | 0         | 0         | 0         | 0         | 0         | 0         | 0         | 0         | 0         | 0         | 0         | 0         | 0         | 0         | 0         |
| K00155   | 0         | 0         | 0         | 2         | 0         | 0         | 0         | 1         | 0         | 0         | 0         | 1         | 0         | 0         | 0         | 1         |
| K00169   | 0         | 2         | 0         | 1         | 0         | 2         | 0         | 1         | 1         | 0         | 0         | 3         | 0         | 0         | 0         | 6         |
| K00224   | 0         | 0         | 0         | 1         | 0         | 0         | 0         | 0         | 1         | 0         | 0         | 1         | 0         | 0         | 0         | 1         |
| K00274   | 0         | 0         | 0         | 0         | 0         | 0         | 0         | 0         | 0         | 0         | 0         | 0         | 0         | 0         | 0         | 0         |
| K00446   | 0         | 0         | 0         | 0         | 0         | 0         | 0         | 1         | 0         | 0         | 0         | 0         | 0         | 0         | 0         | 0         |
| K00448   | 0         | 0         | 0         | 0         | 0         | 0         | 0         | 0         | 0         | 0         | 0         | 0         | 0         | 0         | 0         | 0         |
| K00462   | 1         | 1         | 0         | 1         | 0         | 0         | 2         | 2         | 2         | 0         | 0         | 1         | 1         | 0         | 0         | 3         |
| K00480   | 0         | 0         | 0         | 0         | 0         | 0         | 0         | 0         | 0         | 0         | 0         | 0         | 0         | 0         | 0         | 0         |
| K00481   | 0         | 0         | 0         | 0         | 0         | 0         | 0         | 0         | 0         | 0         | 0         | 0         | 0         | 0         | 0         | 0         |
| K00539   | 0         | 0         | 0         | 1         | 0         | 0         | 0         | 0         | 1         | 0         | 0         | 1         | 0         | 0         | 0         | 0         |
| K00599   | 16        | 19        | 17        | 18        | 5         | 30        | 10        | 35        | 27        | 21        | 16        | 42        | 14        | 9         | 22        | 53        |
| K00626   | 0         | 6         | 3         | 4         | 1         | 5         | 0         | 2         | 2         | 2         | 1         | 6         | 4         | 1         | 1         | 12        |
| K00632   | 0         | 0         | 0         | 0         | 0         | 0         | 0         | 0         | 0         | 0         | 0         | 0         | 0         | 0         | 0         | 0         |
| K00680   | 15        | 29        | 17        | 18        | 8         | 26        | 12        | 49        | 21        | 20        | 7         | 34        | 24        | 5         | 32        | 30        |
| K00757   | 7         | 6         | 6         | 8         | 1         | 10        | 5         | 16        | 7         | 6         | 5         | 12        | 6         | 3         | 6         | 13        |
| K00758   | 0         | 0         | 0         | 0         | 2         | 1         | 0         | 3         | 0         | 1         | 0         | 1         | 3         | 0         | 0         | 3         |
| K00760   | 5         | 7         | 6         | 5         | 2         | 15        | 8         | 19        | 11        | 6         | 7         | 16        | 9         | 2         | 14        | 20        |
| K00799   | 0         | 0         | 2         | 2         | 2         | 0         | 0         | 6         | 0         | 0         | 0         | 0         | 1         | 0         | 1         | 0         |
| K00857   | 5         | 6         | 6         | 6         | 2         | 5         | 1         | 16        | 7         | 3         | 1         | 11        | 3         | 0         | 5         | 10        |
| K00876   | 11        | 17        | 12        | 14        | 7         | 16        | 12        | 30        | 17        | 16        | 11        | 30        | 10        | 3         | 15        | 32        |
| K01026   | 0         | 1         | 0         | 1         | 1         | 2         | 0         | 0         | 0         | 0         | 0         | 0         | 0         | 0         | 0         | 0         |
| K01031   | 0         | 0         | 0         | 0         | 0         | 0         | 0         | 0         | 0         | 0         | 0         | 0         | 0         | 0         | 0         | 0         |

| EC/KO  | CH-NLF014 | CH-NLF015 | CH-NLM001 | CH-NLM002 | CH-NLM003 | CH-NLM004 | CH-NLM005 | CH-NLM006 | CH-NLM007 | CH-NLM008 | CH-NLM009 | CH-NLM010 | CH-NLM015 | CH-NLM016 | CH-NLM017 | CH-NLM021 |
|--------|-----------|-----------|-----------|-----------|-----------|-----------|-----------|-----------|-----------|-----------|-----------|-----------|-----------|-----------|-----------|-----------|
| K01034 | 0         | 2         | 1         | 0         | 1         | 0         | 0         | 2         | 0         | 0         | 0         | 0         | 1         | 0         | 2         | 0         |
| K01039 | 0         | 0         | 0         | 1         | 0         | 0         | 0         | 0         | 1         | 0         | 0         | 0         | 0         | 0         | 0         | 1         |
| K01041 | 5         | 5         | 5         | 7         | 1         | 1         | 2         | 14        | 3         | 4         | 2         | 9         | 5         | 2         | 9         | 7         |
| K01053 | 0         | 0         | 0         | 0         | 0         | 0         | 0         | 0         | 0         | 0         | 0         | 0         | 0         | 0         | 0         | 0         |
| K01055 | 0         | 0         | 0         | 0         | 0         | 0         | 0         | 0         | 0         | 0         | 0         | 0         | 0         | 0         | 0         | 0         |
| K01061 | 0         | 1         | 1         | 0         | 1         | 0         | 0         | 3         | 0         | 0         | 0         | 0         | 1         | 0         | 1         | 0         |
| K01066 | 4         | 3         | 2         | 3         | 1         | 1         | 1         | 8         | 2         | 3         | 0         | 7         | 2         | 0         | 6         | 4         |
| K01075 | 0         | 0         | 1         | 2         | 1         | 0         | 1         | 3         | 2         | 0         | 0         | 0         | 1         | 0         | 1         | 0         |
| K01077 | 6         | 9         | 4         | 5         | 3         | 0         | 3         | 12        | 11        | 4         | 2         | 12        | 5         | 0         | 9         | 11        |
| K01101 | 1         | 3         | 1         | 2         | 1         | 2         | 0         | 2         | 2         | 0         | 0         | 2         | 1         | 1         | 2         | 4         |
| K01195 | 3         | 3         | 3         | 0         | 2         | 3         | 2         | 8         | 7         | 2         | 1         | 13        | 2         | 0         | 6         | 10        |
| K01426 | 0         | 2         | 0         | 1         | 0         | 0         | 0         | 1         | 1         | 0         | 0         | 1         | 0         | 0         | 1         | 1         |
| K01428 | 0         | 0         | 0         | 0         | 0         | 1         | 0         | 0         | 1         | 0         | 0         | 2         | 0         | 0         | 0         | 1         |
| K01457 | 0         | 1         | 0         | 0         | 0         | 1         | 0         | 0         | 0         | 0         | 0         | 0         | 0         | 0         | 0         | 0         |
| K01464 | 0         | 1         | 0         | 1         | 1         | 2         | 0         | 3         | 4         | 0         | 1         | 1         | 0         | 0         | 1         | 1         |
| K01489 | 8         | 8         | 7         | 5         | 3         | 7         | 4         | 15        | 5         | 5         | 6         | 14        | 8         | 2         | 8         | 17        |
| K01500 | 1         | 0         | 0         | 0         | 0         | 0         | 0         | 0         | 0         | 0         | 0         | 0         | 0         | 0         | 0         | 0         |
| K01501 | 0         | 1         | 0         | 1         | 0         | 1         | 0         | 0         | 4         | 0         | 0         | 0         | 0         | 0         | 0         | 3         |
| K01502 | 0         | 0         | 0         | 0         | 0         | 0         | 0         | 0         | 0         | 0         | 0         | 0         | 0         | 0         | 0         | 0         |
| K01512 | 0         | 0         | 1         | 5         | 1         | 10        | 2         | 4         | 4         | 4         | 2         | 4         | 2         | 0         | 2         | 6         |
| K01560 | 1         | 2         | 1         | 1         | 0         | 4         | 0         | 1         | 1         | 1         | 3         | 2         | 1         | 1         | 2         | 2         |
| K01561 | 0         | 1         | 0         | 2         | 0         | 0         | 0         | 0         | 1         | 0         | 0         | 1         | 0         | 0         | 0         | 1         |
| K01563 | 0         | 0         | 0         | 0         | 0         | 0         | 0         | 0         | 0         | 0         | 0         | 0         | 0         | 0         | 0         | 0         |
| K01564 | 1         | 1         | 2         | 2         | 0         | 0         | 0         | 0         | 1         | 0         | 0         | 3         | 2         | 0         | 1         | 2         |
| K01607 | 8         | 9         | 2         | 3         | 4         | 5         | 5         | 15        | 7         | 4         | 4         | 14        | 6         | 2         | 10        | 9         |
| K01612 | 0         | 0         | 0         | 0         | 0         | 0         | 0         | 0         | 0         | 0         | 0         | 0         | 0         | 0         | 0         | 0         |
| K01615 | 8         | 12        | 8         | 7         | 1         | 4         | 7         | 19        | 11        | 5         | 2         | 16        | 8         | 0         | 14        | 23        |
| K01617 | 0         | 0         | 0         | 0         | 0         | 0         | 0         | 0         | 0         | 0         | 0         | 0         | 0         | 0         | 0         | 0         |
| K01666 | 1         | 0         | 3         | 1         | 0         | 7         | 2         | 4         | 1         | 1         | 0         | 6         | 1         | 0         | 0         | 7         |
| K01692 | 0         | 0         | 0         | 0         | 0         | 0         | 0         | 0         | 0         | 0         | 0         | 0         | 1         | 0         | 0         | 0         |
| K01721 | 0         | 0         | 0         | 0         | 0         | 0         | 0         | 0         | 0         | 0         | 0         | 0         | 0         | 0         | 0         | 0         |
| K01726 | 6         | 9         | 3         | 3         | 3         | 2         | 5         | 17        | 6         | 3         | 1         | 3         | 4         | 3         | 11        | 4         |
| K01781 | 0         | 0         | 0         | 1         | 0         | 0         | 0         | 0         | 3         | 0         | 0         | 0         | 0         | 0         | 0         | 0         |
| K01821 | 0         | 1         | 0         | 2         | 2         | 2         | 2         | 5         | 1         | 0         | 0         | 1         | 1         | 0         | 1         | 0         |
| K01856 | 0         | 0         | 0         | 0         | 0         | 0         | 0         | 0         | 0         | 0         | 0         | 0         | 0         | 0         | 0         | 0         |
| K01857 | 0         | 0         | 0         | 1         | 0         | 0         | 0         | 0         | 1         | 0         | 0         | 0         | 0         | 0         | 0         | 2         |
| K01913 | 0         | 0         | 0         | 0         | 0         | 0         | 0         | 1         | 0         | 0         | 0         | 0         | 0         | 0         | 0         | 0         |
| K01951 | 5         | 16        | 10        | 13        | 4         | 14        | 7         | 15        | 11        | 7         | 7         | 18        | 7         | 3         | 13        | 27        |
| K02554 | 0         | 0         | 0         | 0         | 0         | 0         | 0         | 0         | 0         | 0         | 0         | 0         | 0         | 0         | 0         | 0         |
| K03381 | 0         | 0         | 0         | 0         | 0         | 0         | 0         | 0         | 0         | 0         | 0         | 0         | 0         | 0         | 0         | 0         |
| K03382 | 0         | 0         | 0         | 0         | 0         | 0         | 0         | 0         | 0         | 0         | 0         | 0         | 0         | 0         | 0         | 1         |
| K03464 | 0         | 0         | 0         | 0         | 0         | 0         | 0         | 0         | 0         | 0         | 0         | 0         | 0         | 0         | 0         | 0         |
| K03518 | 0         | 4         | 2         | 6         | 0         | 11        | 0         | 5         | 10        | 5         | 2         | 4         | 0         | 0         | 4         | 8         |
| K03862 | 0         | 0         | 0         | 0         | 0         | 0         | 0         | 0         | 0         | 0         | 0         | 0         | 0         | 0         | 0         | 0         |
| K04099 | 0         | 0         | 0         | 0         | 0         | 0         | 0         | 1         | 0         | 0         | 0         | 0         | 0         | 0         | 0         | 0         |
| K04100 | 0         | 0         | 0         | 0         | 0         | 0         | 0         | 0         | 0         | 0         | 0         | 0         | 0         | 0         | 0         | 0         |
| K04102 | 0         | 0         | 0         | 0         | 0         | 0         | 0         | 0         | 0         | 0         | 0         | 0         | 0         | 0         | 0         | 0         |
| K04116 | 0         | 0         | 0         | 0         | 0         | 0         | 0         | 1         | 0         | 0         | 0         | 0         | 0         | 0         | 0         | 0         |
| K05394 | 0         | 0         | 0         | 1         | 0         | 0         | 0         | 0         | 1         | 0         | 0         | 1         | 0         | 0         | 0         | 0         |

| EC/KO  | CH-NLF014 | CH-NLF015 | CH-NLM001 | CH-NLM002 | CH-NLM003 | CH-NLM004 | CH-NLM005 | CH-NLM006 | CH-NLM007 | CH-NLM008 | CH-NLM009 | CH-NLM010 | CH-NLM015 | CH-NLM016 | CH-NLM017 | CH-NLM021 |
|--------|-----------|-----------|-----------|-----------|-----------|-----------|-----------|-----------|-----------|-----------|-----------|-----------|-----------|-----------|-----------|-----------|
| K05549 | 0         | 0         | 0         | 0         | 0         | 0         | 0         | 0         | 0         | 0         | 0         | 0         | 0         | 0         | 0         | 0         |
| K05783 | 0         | 0         | 0         | 0         | 0         | 0         | 0         | 0         | 0         | 0         | 0         | 0         | 0         | 0         | 0         | 0         |
| K05797 | 0         | 0         | 0         | 0         | 0         | 0         | 0         | 0         | 0         | 0         | 0         | 0         | 0         | 0         | 0         | 0         |
| K06281 | 0         | 1         | 0         | 1         | 0         | 0         | 0         | 4         | 2         | 0         | 0         | 2         | 0         | 0         | 1         | 1         |
| K06446 | 0         | 4         | 1         | 7         | 0         | 2         | 1         | 7         | 6         | 2         | 2         | 1         | 4         | 0         | 0         | 4         |
| K06912 | 0         | 0         | 0         | 0         | 0         | 0         | 0         | 0         | 0         | 0         | 0         | 0         | 0         | 0         | 0         | 0         |
| K07535 | 0         | 0         | 0         | 0         | 0         | 0         | 0         | 0         | 0         | 0         | 0         | 0         | 0         | 0         | 0         | 0         |
| K07536 | 3         | 0         | 1         | 3         | 1         | 1         | 0         | 4         | 1         | 2         | 2         | 0         | 0         | 1         | 0         | 3         |
| K08689 | 0         | 0         | 0         | 0         | 0         | 0         | 0         | 0         | 0         | 0         | 0         | 0         | 0         | 0         | 0         | 0         |
| K08710 | 0         | 0         | 0         | 0         | 0         | 0         | 0         | 0         | 0         | 0         | 0         | 0         | 0         | 0         | 0         | 0         |
| K09461 | 0         | 0         | 0         | 0         | 0         | 0         | 0         | 0         | 0         | 0         | 0         | 0         | 0         | 0         | 0         | 0         |
| K10217 | 0         | 0         | 0         | 0         | 0         | 0         | 0         | 0         | 0         | 0         | 0         | 0         | 0         | 0         | 0         | 0         |
| K10218 | 0         | 1         | 0         | 1         | 0         | 0         | 0         | 0         | 1         | 0         | 0         | 1         | 0         | 0         | 0         | 0         |
| K10220 | 0         | 0         | 0         | 0         | 0         | 0         | 0         | 0         | 0         | 0         | 0         | 0         | 0         | 0         | 0         | 0         |
| K11180 | 0         | 0         | 0         | 0         | 0         | 0         | 0         | 0         | 0         | 0         | 0         | 0         | 0         | 0         | 0         | 0         |
| K13953 | 0         | 0         | 1         | 0         | 0         | 1         | 0         | 0         | 0         | 0         | 0         | 0         | 0         | 0         | 0         | 0         |
| K14333 | 0         | 0         | 0         | 0         | 0         | 0         | 0         | 1         | 0         | 0         | 0         | 0         | 0         | 0         | 0         | 0         |
| K14519 | 0         | 0         | 0         | 0         | 0         | 0         | 0         | 0         | 0         | 0         | 0         | 0         | 0         | 0         | 0         | 0         |
| K15054 | 0         | 1         | 0         | 0         | 1         | 0         | 0         | 1         | 1         | 0         | 0         | 0         | 0         | 0         | 0         | 0         |
| K16173 | 0         | 1         | 0         | 0         | 0         | 0         | 0         | 0         | 0         | 0         | 0         | 0         | 0         | 0         | 0         | 0         |
| K16514 | 0         | 0         | 1         | 1         | 1         | 0         | 0         | 1         | 1         | 0         | 0         | 0         | 1         | 0         | 0         | 0         |
| K16874 | 0         | 0         | 0         | 0         | 0         | 0         | 0         | 0         | 0         | 0         | 0         | 0         | 0         | 0         | 0         | 0         |

| EC/KO      | CH-NLM022 | CH-NLM023 | CH-NLM024 | CH-NLM025 | CH-NLM026 | CH-NLM027 | CH-NLM028 | CH-NLM029 | CH-NLM031 | CH-NLM032 | CH-NOF001 | CH-NOF002 | CH-NOF004 | CH-NOF005 | CH-NOF006 | CH-NOF007 |
|------------|-----------|-----------|-----------|-----------|-----------|-----------|-----------|-----------|-----------|-----------|-----------|-----------|-----------|-----------|-----------|-----------|
| 1.1.1.-    | 38        | 64        | 32        | 10        | 44        | 73        | 41        | 39        | 38        | 53        | 18        | 27        | 30        | 55        | 38        | 31        |
| 1.1.1.1    | 40        | 54        | 21        | 20        | 54        | 64        | 47        | 39        | 42        | 52        | 12        | 27        | 26        | 52        | 27        | 21        |
| 1.1.1.157  | 0         | 1         | 0         | 0         | 1         | 0         | 0         | 0         | 1         | 0         | 1         | 1         | 0         | 1         | 0         | 1         |
| 1.1.1.205  | 26        | 22        | 17        | 14        | 33        | 23        | 20        | 23        | 21        | 20        | 6         | 18        | 17        | 27        | 11        | 13        |
| 1.1.1.35   | 0         | 2         | 0         | 0         | 0         | 5         | 2         | 1         | 2         | 2         | 1         | 3         | 1         | 3         | 1         | 0         |
| 1.12.99.6  | 2         | 4         | 5         | 0         | 0         | 3         | 0         | 0         | 0         | 3         | 1         | 1         | 0         | 0         | 3         | 1         |
| 1.13.11.-  | 0         | 0         | 0         | 0         | 0         | 0         | 0         | 0         | 0         | 0         | 0         | 0         | 0         | 0         | 0         | 0         |
| 1.13.11.1  | 0         | 0         | 0         | 0         | 0         | 0         | 0         | 0         | 0         | 0         | 0         | 0         | 0         | 0         | 0         | 0         |
| 1.13.11.2  | 0         | 0         | 0         | 0         | 0         | 0         | 0         | 0         | 0         | 0         | 0         | 0         | 0         | 0         | 0         | 0         |
| 1.13.11.3  | 0         | 0         | 0         | 0         | 0         | 0         | 0         | 0         | 0         | 0         | 0         | 0         | 0         | 0         | 0         | 0         |
| 1.13.11.39 | 0         | 0         | 0         | 0         | 0         | 4         | 0         | 0         | 0         | 0         | 0         | 0         | 0         | 0         | 0         | 0         |
| 1.13.11.5  | 0         | 1         | 0         | 0         | 1         | 0         | 0         | 0         | 0         | 0         | 0         | 0         | 0         | 0         | 0         | 0         |
| 1.13.11.8  | 0         | 0         | 0         | 0         | 0         | 0         | 0         | 0         | 0         | 0         | 0         | 0         | 0         | 0         | 0         | 0         |
| 1.14.12.10 | 1         | 1         | 1         | 0         | 0         | 0         | 0         | 0         | 0         | 0         | 0         | 1         | 1         | 0         | 1         | 0         |
| 1.14.12.13 | 0         | 0         | 0         | 0         | 0         | 0         | 0         | 0         | 0         | 0         | 0         | 0         | 0         | 0         | 0         | 0         |
| 1.14.12.18 | 0         | 0         | 0         | 0         | 0         | 1         | 0         | 0         | 0         | 0         | 0         | 0         | 0         | 0         | 0         | 0         |
| 1.14.13.-  | 1         | 1         | 3         | 0         | 0         | 5         | 0         | 0         | 0         | 0         | 0         | 2         | 0         | 0         | 3         | 0         |
| 1.14.13.1  | 0         | 0         | 0         | 0         | 0         | 0         | 0         | 0         | 0         | 0         | 0         | 0         | 0         | 0         | 0         | 0         |
| 1.14.13.2  | 0         | 0         | 0         | 0         | 0         | 0         | 0         | 0         | 0         | 0         | 0         | 0         | 0         | 0         | 0         | 0         |
| 1.14.13.50 | 0         | 0         | 0         | 0         | 0         | 0         | 0         | 0         | 0         | 0         | 0         | 0         | 0         | 0         | 0         | 0         |
| 1.14.13.7  | 0         | 0         | 0         | 0         | 0         | 0         | 0         | 0         | 0         | 0         | 0         | 0         | 0         | 0         | 0         | 0         |
| 1.14.13.8  | 0         | 0         | 0         | 0         | 0         | 0         | 0         | 0         | 0         | 0         | 0         | 0         | 0         | 0         | 0         | 0         |
| 1.14.13.82 | 0         | 0         | 0         | 0         | 0         | 1         | 0         | 0         | 0         | 0         | 0         | 0         | 0         | 0         | 0         | 0         |
| 1.14.99.-  | 0         | 0         | 0         | 0         | 0         | 0         | 0         | 0         | 0         | 0         | 0         | 0         | 0         | 0         | 0         | 0         |
| 1.17.99.1  | 0         | 0         | 0         | 0         | 0         | 0         | 0         | 0         | 0         | 0         | 0         | 0         | 0         | 0         | 0         | 0         |
| 1.18.6.1   | 0         | 0         | 0         | 0         | 0         | 0         | 0         | 0         | 1         | 0         | 0         | 0         | 0         | 0         | 0         | 0         |
| 1.2.1.-    | 0         | 0         | 2         | 0         | 0         | 2         | 0         | 0         | 0         | 0         | 0         | 1         | 0         | 0         | 0         | 0         |
| 1.2.1.10   | 9         | 6         | 1         | 4         | 6         | 5         | 4         | 9         | 4         | 5         | 3         | 11        | 4         | 7         | 2         | 0         |
| 1.2.1.3    | 4         | 11        | 6         | 0         | 5         | 17        | 6         | 4         | 5         | 11        | 2         | 6         | 4         | 7         | 5         | 2         |
| 1.2.1.39   | 0         | 0         | 1         | 0         | 0         | 0         | 0         | 0         | 0         | 0         | 0         | 0         | 0         | 0         | 0         | 0         |
| 1.2.7.1    | 6         | 11        | 7         | 7         | 20        | 0         | 4         | 8         | 11        | 12        | 5         | 4         | 10        | 11        | 5         | 9         |
| 1.2.99.2   | 3         | 6         | 2         | 2         | 6         | 8         | 5         | 3         | 3         | 3         | 2         | 1         | 0         | 5         | 3         | 0         |
| 1.3.1.-    | 1         | 1         | 0         | 0         | 1         | 0         | 0         | 0         | 0         | 1         | 0         | 1         | 0         | 1         | 1         | 1         |
| 1.3.1.2    | 1         | 1         | 1         | 0         | 0         | 0         | 1         | 0         | 0         | 0         | 0         | 0         | 1         | 0         | 0         | 0         |
| 1.3.1.25   | 0         | 0         | 0         | 0         | 0         | 0         | 0         | 0         | 0         | 0         | 0         | 0         | 0         | 0         | 0         | 0         |
| 1.3.99.-   | 2         | 0         | 1         | 0         | 0         | 0         | 0         | 0         | 0         | 0         | 0         | 0         | 0         | 0         | 1         | 0         |
| 1.6.5.-    | 38        | 47        | 26        | 22        | 50        | 21        | 26        | 47        | 39        | 40        | 28        | 16        | 29        | 42        | 30        | 22        |
| 1.7.1.-    | 9         | 12        | 6         | 8         | 8         | 10        | 6         | 6         | 7         | 8         | 8         | 5         | 8         | 10        | 4         | 6         |
| 1.8.99.3   | 0         | 0         | 0         | 1         | 0         | 0         | 0         | 0         | 0         | 0         | 0         | 1         | 0         | 0         | 1         | 0         |
| 2.1.1.-    | 203       | 222       | 119       | 91        | 245       | 268       | 182       | 236       | 199       | 297       | 96        | 126       | 157       | 252       | 120       | 146       |
| 2.3.1.-    | 122       | 162       | 76        | 41        | 143       | 133       | 90        | 125       | 111       | 149       | 76        | 69        | 103       | 141       | 106       | 94        |
| 2.3.1.16   | 3         | 3         | 2         | 1         | 5         | 1         | 0         | 5         | 1         | 2         | 1         | 0         | 3         | 5         | 0         | 0         |
| 2.3.1.5    | 1         | 0         | 1         | 0         | 0         | 1         | 0         | 0         | 0         | 0         | 0         | 0         | 0         | 0         | 0         | 0         |
| 2.3.1.9    | 2         | 3         | 4         | 0         | 0         | 2         | 1         | 0         | 0         | 1         | 0         | 3         | 1         | 1         | 1         | 2         |
| 2.4.2.10   | 13        | 16        | 9         | 9         | 11        | 15        | 14        | 14        | 14        | 17        | 4         | 9         | 6         | 20        | 4         | 10        |
| 2.4.2.3    | 3         | 4         | 2         | 3         | 8         | 26        | 8         | 8         | 5         | 8         | 4         | 4         | 6         | 6         | 3         | 5         |
| 2.4.2.4    | 1         | 1         | 1         | 1         | 8         | 7         | 3         | 4         | 3         | 7         | 0         | 1         | 1         | 2         | 0         | 0         |
| 2.4.2.8    | 9         | 14        | 5         | 7         | 10        | 17        | 7         | 10        | 10        | 15        | 8         | 7         | 7         | 14        | 7         | 10        |
| 2.5.1.-    | 16        | 24        | 18        | 13        | 19        | 16        | 14        | 18        | 20        | 16        | 16        | 9         | 14        | 17        | 13        | 17        |



| EC/KO    | CH-NLM022 | CH-NLM023 | CH-NLM024 | CH-NLM025 | CH-NLM026 | CH-NLM027 | CH-NLM028 | CH-NLM029 | CH-NLM031 | CH-NLM032 | CH-NOF001 | CH-NOF002 | CH-NOF004 | CH-NOF005 | CH-NOF006 | CH-NOF007 |
|----------|-----------|-----------|-----------|-----------|-----------|-----------|-----------|-----------|-----------|-----------|-----------|-----------|-----------|-----------|-----------|-----------|
| 2.5.1.18 | 6         | 5         | 6         | 1         | 0         | 8         | 1         | 1         | 1         | 3         | 0         | 6         | 0         | 0         | 5         | 0         |
| 2.6.1.-  | 24        | 44        | 16        | 13        | 33        | 23        | 26        | 32        | 25        | 31        | 19        | 16        | 20        | 41        | 20        | 20        |
| 2.7.1.21 | 5         | 10        | 3         | 3         | 7         | 8         | 8         | 6         | 5         | 6         | 3         | 3         | 3         | 8         | 7         | 4         |
| 2.7.1.48 | 21        | 27        | 13        | 10        | 23        | 27        | 20        | 23        | 20        | 24        | 12        | 13        | 16        | 28        | 15        | 13        |
| 2.7.4.-  | 9         | 20        | 9         | 7         | 21        | 16        | 11        | 11        | 16        | 17        | 9         | 9         | 5         | 15        | 9         | 12        |
| 2.8.3.-  | 0         | 3         | 4         | 1         | 0         | 0         | 0         | 2         | 2         | 0         | 2         | 1         | 0         | 3         | 1         | 0         |
| 2.8.3.1  | 1         | 2         | 0         | 0         | 0         | 0         | 0         | 0         | 0         | 1         | 0         | 2         | 0         | 0         | 0         | 0         |
| 2.8.3.12 | 0         | 1         | 0         | 0         | 1         | 0         | 0         | 0         | 0         | 0         | 0         | 1         | 0         | 0         | 0         | 0         |
| 2.8.3.6  | 0         | 0         | 0         | 0         | 0         | 0         | 1         | 1         | 0         | 0         | 1         | 1         | 0         | 0         | 0         | 1         |
| 2.8.3.8  | 2         | 1         | 2         | 0         | 2         | 4         | 1         | 0         | 0         | 2         | 0         | 1         | 0         | 0         | 1         | 1         |
| 3.1.1.-  | 7         | 10        | 6         | 1         | 1         | 7         | 4         | 3         | 3         | 9         | 4         | 3         | 4         | 6         | 7         | 1         |
| 3.1.1.1  | 5         | 9         | 7         | 1         | 7         | 4         | 1         | 3         | 9         | 3         | 1         | 4         | 3         | 6         | 7         | 2         |
| 3.1.1.17 | 0         | 5         | 1         | 0         | 4         | 1         | 0         | 1         | 1         | 2         | 0         | 1         | 3         | 2         | 2         | 4         |
| 3.1.1.2  | 1         | 1         | 1         | 0         | 1         | 3         | 1         | 1         | 0         | 1         | 0         | 1         | 0         | 0         | 1         | 1         |
| 3.1.1.24 | 2         | 1         | 1         | 0         | 4         | 2         | 0         | 2         | 3         | 2         | 0         | 2         | 0         | 0         | 2         | 3         |
| 3.1.1.45 | 1         | 1         | 1         | 0         | 0         | 0         | 0         | 0         | 0         | 0         | 0         | 1         | 0         | 0         | 1         | 0         |
| 3.1.2.-  | 2         | 2         | 2         | 0         | 0         | 4         | 0         | 0         | 0         | 1         | 0         | 1         | 0         | 1         | 1         | 0         |
| 3.1.2.23 | 3         | 6         | 3         | 1         | 5         | 0         | 2         | 3         | 4         | 2         | 6         | 0         | 6         | 4         | 5         | 2         |
| 3.1.3.1  | 11        | 22        | 10        | 8         | 15        | 3         | 10        | 9         | 21        | 12        | 12        | 12        | 10        | 20        | 19        | 15        |
| 3.1.3.2  | 8         | 8         | 5         | 3         | 9         | 5         | 3         | 3         | 7         | 5         | 3         | 3         | 7         | 5         | 6         | 5         |
| 3.1.3.41 | 0         | 0         | 0         | 0         | 0         | 0         | 0         | 0         | 0         | 0         | 0         | 0         | 0         | 0         | 0         | 0         |
| 3.2.1.31 | 6         | 5         | 1         | 2         | 1         | 2         | 3         | 6         | 2         | 4         | 1         | 3         | 1         | 3         | 1         | 6         |
| 3.3.2.9  | 0         | 0         | 0         | 0         | 0         | 1         | 0         | 0         | 0         | 0         | 0         | 0         | 0         | 0         | 0         | 0         |
| 3.5.1.-  | 17        | 17        | 7         | 9         | 21        | 31        | 14        | 28        | 9         | 24        | 10        | 9         | 13        | 20        | 9         | 6         |
| 3.5.1.4  | 0         | 3         | 1         | 2         | 0         | 2         | 1         | 1         | 2         | 3         | 3         | 0         | 0         | 1         | 1         | 0         |
| 3.5.1.5  | 2         | 2         | 0         | 1         | 2         | 2         | 0         | 0         | 2         | 2         | 2         | 2         | 2         | 0         | 0         | 1         |
| 3.5.1.54 | 2         | 0         | 1         | 1         | 0         | 5         | 3         | 1         | 1         | 4         | 0         | 2         | 0         | 6         | 3         | 1         |
| 3.5.1.6  | 2         | 2         | 1         | 0         | 1         | 2         | 1         | 2         | 1         | 1         | 1         | 1         | 0         | 1         | 0         | 0         |
| 3.5.2.-  | 0         | 0         | 0         | 0         | 0         | 0         | 0         | 0         | 0         | 0         | 0         | 0         | 0         | 1         | 0         | 0         |
| 3.5.2.2  | 1         | 0         | 0         | 0         | 1         | 2         | 1         | 1         | 1         | 3         | 0         | 0         | 0         | 0         | 0         | 0         |
| 3.5.4.-  | 12        | 19        | 10        | 11        | 19        | 21        | 11        | 17        | 16        | 21        | 7         | 7         | 12        | 21        | 8         | 12        |
| 3.5.4.5  | 8         | 9         | 5         | 4         | 15        | 5         | 4         | 9         | 6         | 10        | 8         | 6         | 7         | 12        | 7         | 7         |
| 3.5.5.1  | 0         | 1         | 1         | 1         | 0         | 0         | 0         | 0         | 2         | 0         | 0         | 0         | 0         | 1         | 1         | 1         |
| 3.5.5.7  | 0         | 0         | 0         | 0         | 0         | 0         | 0         | 0         | 0         | 0         | 0         | 0         | 0         | 0         | 0         | 0         |
| 3.5.99.3 | 0         | 0         | 0         | 0         | 0         | 0         | 0         | 0         | 0         | 0         | 0         | 0         | 0         | 0         | 0         | 0         |
| 3.6.1.7  | 4         | 4         | 1         | 1         | 6         | 9         | 7         | 2         | 3         | 10        | 0         | 1         | 2         | 7         | 2         | 7         |
| 3.7.1.-  | 3         | 1         | 2         | 1         | 1         | 4         | 0         | 2         | 1         | 1         | 1         | 1         | 0         | 0         | 2         | 0         |
| 3.7.1.2  | 5         | 7         | 2         | 0         | 3         | 0         | 3         | 3         | 2         | 2         | 2         | 2         | 2         | 7         | 7         | 3         |
| 3.8.1.2  | 4         | 8         | 3         | 1         | 8         | 9         | 4         | 4         | 6         | 8         | 2         | 3         | 8         | 9         | 8         | 6         |
| 3.8.1.3  | 0         | 0         | 0         | 0         | 0         | 0         | 0         | 0         | 0         | 0         | 0         | 0         | 0         | 0         | 0         | 0         |
| 3.8.1.5  | 0         | 1         | 0         | 0         | 0         | 2         | 0         | 1         | 0         | 0         | 0         | 0         | 0         | 1         | 0         | 0         |
| 4.1.1.-  | 11        | 19        | 11        | 2         | 6         | 11        | 7         | 13        | 7         | 11        | 10        | 5         | 9         | 8         | 10        | 5         |
| 4.1.1.44 | 13        | 25        | 13        | 6         | 10        | 15        | 10        | 15        | 17        | 15        | 3         | 6         | 12        | 15        | 14        | 15        |
| 4.1.1.55 | 0         | 0         | 0         | 0         | 0         | 0         | 0         | 0         | 0         | 0         | 0         | 0         | 0         | 0         | 0         | 0         |
| 4.1.1.7  | 0         | 0         | 0         | 0         | 0         | 0         | 0         | 0         | 0         | 0         | 0         | 0         | 0         | 0         | 0         | 0         |
| 4.1.1.70 | 0         | 0         | 0         | 0         | 0         | 0         | 0         | 0         | 0         | 0         | 0         | 1         | 0         | 0         | 0         | 0         |
| 4.1.1.77 | 0         | 0         | 0         | 0         | 0         | 0         | 0         | 0         | 0         | 0         | 0         | 0         | 0         | 1         | 0         | 0         |
| 4.1.2.-  | 7         | 5         | 6         | 2         | 6         | 7         | 8         | 6         | 3         | 9         | 2         | 3         | 0         | 10        | 2         | 2         |
| 4.1.3.-  | 21        | 22        | 7         | 8         | 19        | 14        | 16        | 19        | 20        | 13        | 8         | 9         | 13        | 12        | 8         | 12        |

| EC/KO    | CH-NLM022 | CH-NLM023 | CH-NLM024 | CH-NLM025 | CH-NLM026 | CH-NLM027 | CH-NLM028 | CH-NLM029 | CH-NLM031 | CH-NLM032 | CH-NOF001 | CH-NOF002 | CH-NOF004 | CH-NOF005 | CH-NOF006 | CH-NOF007 |
|----------|-----------|-----------|-----------|-----------|-----------|-----------|-----------|-----------|-----------|-----------|-----------|-----------|-----------|-----------|-----------|-----------|
| 4.1.3.39 | 2         | 1         | 2         | 0         | 0         | 0         | 1         | 0         | 0         | 0         | 0         | 0         | 0         | 0         | 1         | 0         |
| 4.1.99.- | 1         | 2         | 0         | 0         | 4         | 0         | 0         | 5         | 1         | 3         | 0         | 0         | 0         | 0         | 0         | 0         |
| 4.2.1.-  | 42        | 71        | 20        | 16        | 35        | 31        | 32        | 48        | 37        | 47        | 18        | 28        | 27        | 59        | 41        | 37        |
| 4.2.1.17 | 5         | 5         | 3         | 2         | 5         | 5         | 3         | 6         | 3         | 5         | 1         | 5         | 1         | 9         | 2         | 3         |
| 4.2.1.80 | 0         | 1         | 0         | 0         | 0         | 0         | 0         | 0         | 0         | 0         | 0         | 0         | 1         | 0         | 0         | 0         |
| 4.2.1.83 | 1         | 0         | 0         | 1         | 0         | 0         | 1         | 1         | 0         | 0         | 0         | 0         | 0         | 0         | 0         | 0         |
| 4.2.1.84 | 0         | 0         | 0         | 0         | 0         | 0         | 1         | 0         | 0         | 0         | 0         | 0         | 0         | 0         | 0         | 0         |
| 5.1.2.2  | 0         | 0         | 0         | 0         | 0         | 0         | 0         | 0         | 0         | 0         | 0         | 0         | 0         | 0         | 0         | 0         |
| 5.2.1.2  | 0         | 0         | 0         | 0         | 0         | 0         | 0         | 0         | 0         | 0         | 0         | 0         | 0         | 0         | 0         | 0         |
| 5.3.3.4  | 0         | 0         | 0         | 0         | 0         | 0         | 0         | 0         | 0         | 0         | 0         | 0         | 0         | 0         | 0         | 0         |
| 5.3.99.- | 1         | 2         | 2         | 1         | 3         | 7         | 2         | 4         | 4         | 5         | 4         | 1         | 0         | 4         | 0         | 1         |
| 5.4.99.- | 1         | 0         | 0         | 0         | 0         | 0         | 0         | 1         | 0         | 0         | 1         | 0         | 0         | 0         | 0         | 0         |
| 5.5.1.1  | 2         | 6         | 5         | 0         | 4         | 0         | 5         | 3         | 3         | 5         | 2         | 2         | 3         | 6         | 5         | 2         |
| 5.5.1.2  | 0         | 0         | 0         | 0         | 0         | 0         | 0         | 0         | 0         | 0         | 0         | 0         | 0         | 0         | 0         | 0         |
| 6.2.1.-  | 0         | 0         | 0         | 0         | 0         | 1         | 0         | 0         | 0         | 0         | 0         | 0         | 0         | 0         | 0         | 0         |
| 6.3.5.2  | 17        | 15        | 12        | 7         | 21        | 14        | 11        | 28        | 17        | 18        | 9         | 9         | 10        | 17        | 12        | 11        |
| K00002   | 0         | 0         | 0         | 0         | 0         | 2         | 1         | 1         | 0         | 1         | 0         | 1         | 0         | 2         | 1         | 1         |
| K00055   | 0         | 0         | 0         | 0         | 0         | 1         | 0         | 0         | 0         | 0         | 0         | 0         | 0         | 0         | 0         | 0         |
| K00074   | 3         | 5         | 1         | 0         | 6         | 5         | 3         | 2         | 5         | 6         | 3         | 5         | 2         | 7         | 1         | 1         |
| K00088   | 19        | 18        | 13        | 8         | 23        | 21        | 16        | 21        | 17        | 17        | 10        | 12        | 12        | 26        | 13        | 14        |
| K00100   | 36        | 70        | 34        | 19        | 39        | 54        | 37        | 42        | 30        | 66        | 18        | 21        | 24        | 49        | 33        | 28        |
| K00128   | 4         | 3         | 0         | 0         | 0         | 4         | 1         | 2         | 1         | 2         | 1         | 3         | 2         | 2         | 1         | 0         |
| K00129   | 0         | 0         | 0         | 0         | 0         | 0         | 0         | 0         | 0         | 0         | 0         | 0         | 0         | 0         | 0         | 0         |
| K00132   | 0         | 0         | 0         | 0         | 0         | 0         | 1         | 0         | 0         | 0         | 0         | 0         | 0         | 0         | 0         | 0         |
| K00141   | 0         | 0         | 0         | 0         | 0         | 0         | 0         | 0         | 0         | 0         | 0         | 0         | 0         | 0         | 0         | 0         |
| K00146   | 0         | 0         | 1         | 0         | 0         | 2         | 0         | 0         | 0         | 0         | 0         | 0         | 0         | 0         | 0         | 0         |
| K00148   | 0         | 0         | 0         | 0         | 0         | 0         | 0         | 0         | 0         | 0         | 0         | 0         | 0         | 0         | 0         | 0         |
| K00155   | 0         | 1         | 1         | 0         | 0         | 0         | 0         | 0         | 0         | 0         | 0         | 0         | 0         | 0         | 1         | 0         |
| K00169   | 1         | 3         | 2         | 1         | 3         | 0         | 1         | 2         | 1         | 2         | 1         | 0         | 1         | 1         | 0         | 2         |
| K00224   | 0         | 1         | 1         | 0         | 0         | 0         | 0         | 0         | 0         | 0         | 0         | 0         | 0         | 0         | 0         | 0         |
| K00274   | 0         | 0         | 0         | 0         | 0         | 0         | 0         | 0         | 0         | 0         | 0         | 0         | 0         | 0         | 0         | 0         |
| K00446   | 0         | 0         | 0         | 0         | 0         | 0         | 0         | 0         | 0         | 0         | 0         | 0         | 0         | 0         | 0         | 0         |
| K00448   | 0         | 0         | 0         | 0         | 0         | 0         | 0         | 0         | 0         | 0         | 0         | 0         | 0         | 0         | 0         | 0         |
| K00462   | 0         | 2         | 0         | 1         | 0         | 0         | 0         | 0         | 0         | 0         | 1         | 0         | 1         | 1         | 1         | 2         |
| K00480   | 0         | 0         | 0         | 0         | 0         | 1         | 0         | 0         | 0         | 0         | 0         | 0         | 0         | 0         | 0         | 0         |
| K00481   | 0         | 0         | 0         | 0         | 0         | 1         | 0         | 0         | 0         | 0         | 0         | 0         | 0         | 0         | 0         | 0         |
| K00539   | 0         | 1         | 0         | 0         | 0         | 0         | 0         | 0         | 0         | 0         | 0         | 0         | 0         | 0         | 0         | 1         |
| K00599   | 42        | 43        | 17        | 18        | 37        | 47        | 40        | 59        | 31        | 61        | 12        | 19        | 32        | 47        | 18        | 26        |
| K00626   | 5         | 4         | 4         | 1         | 8         | 6         | 4         | 9         | 3         | 5         | 1         | 5         | 4         | 9         | 1         | 4         |
| K00632   | 1         | 2         | 1         | 0         | 0         | 0         | 0         | 0         | 0         | 0         | 0         | 0         | 0         | 0         | 0         | 0         |
| K00680   | 30        | 40        | 32        | 13        | 29        | 33        | 20        | 25        | 27        | 38        | 17        | 14        | 21        | 43        | 29        | 27        |
| K00757   | 4         | 9         | 7         | 3         | 11        | 10        | 11        | 5         | 12        | 9         | 6         | 5         | 9         | 11        | 8         | 8         |
| K00758   | 2         | 2         | 1         | 1         | 2         | 1         | 1         | 5         | 1         | 2         | 1         | 1         | 0         | 2         | 2         | 2         |
| K00760   | 16        | 17        | 4         | 6         | 16        | 21        | 10        | 20        | 16        | 19        | 10        | 9         | 10        | 19        | 8         | 12        |
| K00799   | 2         | 2         | 1         | 0         | 0         | 3         | 0         | 0         | 0         | 1         | 0         | 1         | 0         | 0         | 1         | 0         |
| K00857   | 8         | 11        | 4         | 5         | 12        | 11        | 10        | 13        | 10        | 11        | 5         | 4         | 5         | 12        | 7         | 6         |
| K00876   | 25        | 24        | 13        | 10        | 27        | 23        | 20        | 28        | 24        | 27        | 14        | 12        | 16        | 30        | 14        | 12        |
| K01026   | 0         | 0         | 1         | 0         | 1         | 2         | 1         | 0         | 0         | 0         | 0         | 2         | 0         | 0         | 0         | 0         |
| K01031   | 0         | 0         | 0         | 0         | 0         | 1         | 0         | 0         | 0         | 0         | 0         | 0         | 0         | 0         | 0         | 0         |

| EC/KO  | CH-NLM022 | CH-NLM023 | CH-NLM024 | CH-NLM025 | CH-NLM026 | CH-NLM027 | CH-NLM028 | CH-NLM029 | CH-NLM031 | CH-NLM032 | CH-NOF001 | CH-NOF002 | CH-NOF004 | CH-NOF005 | CH-NOF006 | CH-NOF007 |
|--------|-----------|-----------|-----------|-----------|-----------|-----------|-----------|-----------|-----------|-----------|-----------|-----------|-----------|-----------|-----------|-----------|
| K01034 | 2         | 1         | 0         | 0         | 1         | 3         | 0         | 0         | 1         | 1         | 1         | 1         | 1         | 1         | 1         | 0         |
| K01039 | 0         | 1         | 0         | 0         | 1         | 0         | 0         | 1         | 0         | 0         | 0         | 1         | 0         | 1         | 0         | 0         |
| K01041 | 7         | 7         | 7         | 1         | 6         | 0         | 5         | 6         | 7         | 6         | 4         | 3         | 5         | 4         | 8         | 6         |
| K01053 | 0         | 0         | 0         | 0         | 0         | 0         | 0         | 0         | 0         | 0         | 0         | 0         | 0         | 0         | 0         | 0         |
| K01055 | 0         | 0         | 0         | 0         | 0         | 1         | 0         | 0         | 0         | 0         | 0         | 0         | 0         | 0         | 0         | 0         |
| K01061 | 1         | 1         | 2         | 0         | 0         | 0         | 0         | 0         | 0         | 0         | 0         | 2         | 0         | 0         | 1         | 0         |
| K01066 | 5         | 8         | 5         | 0         | 9         | 9         | 3         | 3         | 8         | 2         | 0         | 5         | 3         | 7         | 4         | 2         |
| K01075 | 1         | 1         | 2         | 1         | 0         | 1         | 0         | 0         | 0         | 1         | 0         | 1         | 0         | 0         | 1         | 1         |
| K01077 | 6         | 16        | 6         | 3         | 8         | 3         | 7         | 6         | 9         | 8         | 3         | 5         | 6         | 11        | 11        | 7         |
| K01101 | 0         | 4         | 1         | 0         | 2         | 4         | 2         | 2         | 2         | 3         | 3         | 0         | 1         | 3         | 2         | 1         |
| K01195 | 9         | 11        | 4         | 1         | 6         | 4         | 5         | 13        | 7         | 10        | 2         | 6         | 3         | 7         | 6         | 5         |
| K01426 | 0         | 0         | 2         | 0         | 0         | 4         | 0         | 1         | 0         | 0         | 1         | 0         | 0         | 1         | 0         | 0         |
| K01428 | 1         | 0         | 0         | 1         | 1         | 3         | 1         | 1         | 1         | 1         | 0         | 1         | 1         | 0         | 0         | 0         |
| K01457 | 0         | 0         | 0         | 0         | 0         | 0         | 0         | 0         | 0         | 0         | 0         | 0         | 0         | 0         | 0         | 0         |
| K01464 | 1         | 2         | 2         | 0         | 0         | 5         | 1         | 1         | 2         | 3         | 0         | 1         | 0         | 1         | 0         | 0         |
| K01489 | 11        | 9         | 5         | 7         | 14        | 10        | 6         | 11        | 11        | 17        | 10        | 7         | 9         | 17        | 8         | 11        |
| K01500 | 0         | 0         | 0         | 1         | 0         | 0         | 0         | 0         | 0         | 0         | 0         | 0         | 0         | 0         | 0         | 0         |
| K01501 | 0         | 1         | 2         | 1         | 0         | 3         | 0         | 0         | 4         | 1         | 0         | 0         | 0         | 1         | 0         | 0         |
| K01502 | 0         | 0         | 0         | 0         | 0         | 0         | 0         | 0         | 0         | 0         | 0         | 0         | 0         | 0         | 0         | 0         |
| K01512 | 9         | 4         | 1         | 1         | 7         | 13        | 8         | 4         | 3         | 15        | 1         | 2         | 2         | 8         | 2         | 7         |
| K01560 | 6         | 1         | 1         | 3         | 3         | 2         | 5         | 3         | 4         | 7         | 0         | 1         | 1         | 3         | 1         | 4         |
| K01561 | 0         | 2         | 1         | 0         | 0         | 0         | 0         | 1         | 0         | 0         | 0         | 0         | 0         | 1         | 0         | 1         |
| K01563 | 0         | 0         | 0         | 0         | 0         | 0         | 0         | 0         | 0         | 0         | 0         | 0         | 0         | 0         | 0         | 0         |
| K01564 | 1         | 4         | 3         | 0         | 1         | 1         | 0         | 1         | 1         | 0         | 2         | 0         | 0         | 0         | 2         | 2         |
| K01607 | 6         | 12        | 9         | 3         | 4         | 10        | 5         | 11        | 12        | 8         | 2         | 5         | 6         | 11        | 10        | 6         |
| K01612 | 0         | 0         | 0         | 0         | 0         | 0         | 0         | 0         | 0         | 0         | 0         | 0         | 0         | 0         | 0         | 0         |
| K01615 | 14        | 13        | 13        | 7         | 19        | 7         | 12        | 22        | 14        | 18        | 6         | 11        | 12        | 21        | 11        | 12        |
| K01617 | 0         | 0         | 0         | 0         | 0         | 0         | 0         | 0         | 0         | 0         | 0         | 0         | 0         | 0         | 0         | 0         |
| K01666 | 10        | 3         | 2         | 3         | 5         | 0         | 4         | 12        | 2         | 2         | 1         | 3         | 5         | 4         | 1         | 2         |
| K01692 | 0         | 0         | 1         | 0         | 0         | 0         | 0         | 0         | 0         | 0         | 0         | 0         | 0         | 0         | 0         | 0         |
| K01721 | 0         | 0         | 0         | 0         | 0         | 0         | 0         | 0         | 0         | 0         | 0         | 0         | 0         | 0         | 0         | 0         |
| K01726 | 5         | 11        | 8         | 5         | 9         | 8         | 3         | 4         | 9         | 3         | 4         | 3         | 2         | 11        | 12        | 7         |
| K01781 | 0         | 1         | 0         | 0         | 0         | 0         | 0         | 0         | 0         | 0         | 0         | 1         | 0         | 0         | 0         | 0         |
| K01821 | 2         | 2         | 1         | 0         | 2         | 5         | 0         | 0         | 2         | 4         | 0         | 0         | 0         | 1         | 1         | 1         |
| K01856 | 0         | 0         | 0         | 0         | 0         | 0         | 0         | 0         | 0         | 0         | 0         | 0         | 0         | 0         | 0         | 0         |
| K01857 | 0         | 1         | 0         | 0         | 0         | 0         | 0         | 0         | 0         | 0         | 0         | 0         | 0         | 0         | 0         | 1         |
| K01913 | 1         | 1         | 0         | 0         | 0         | 0         | 0         | 0         | 0         | 0         | 0         | 0         | 0         | 1         | 0         | 0         |
| K01951 | 17        | 13        | 11        | 6         | 20        | 24        | 11        | 24        | 18        | 21        | 9         | 10        | 10        | 18        | 9         | 10        |
| K02554 | 0         | 1         | 0         | 0         | 0         | 0         | 0         | 0         | 0         | 0         | 0         | 1         | 0         | 0         | 0         | 0         |
| K03381 | 0         | 0         | 0         | 0         | 0         | 0         | 0         | 0         | 0         | 0         | 0         | 0         | 0         | 0         | 0         | 0         |
| K03382 | 0         | 1         | 0         | 0         | 0         | 0         | 0         | 1         | 1         | 0         | 0         | 0         | 0         | 0         | 0         | 0         |
| K03464 | 0         | 0         | 0         | 0         | 0         | 0         | 0         | 0         | 0         | 0         | 0         | 0         | 0         | 0         | 0         | 0         |
| K03518 | 4         | 8         | 2         | 2         | 4         | 20        | 13        | 8         | 7         | 17        | 3         | 6         | 1         | 13        | 0         | 3         |
| K03862 | 0         | 0         | 0         | 0         | 0         | 1         | 0         | 0         | 0         | 0         | 0         | 0         | 0         | 0         | 0         | 0         |
| K04099 | 0         | 0         | 0         | 0         | 0         | 0         | 0         | 0         | 0         | 0         | 0         | 0         | 0         | 0         | 0         | 0         |
| K04100 | 0         | 0         | 0         | 0         | 0         | 0         | 0         | 0         | 0         | 0         | 0         | 0         | 0         | 0         | 0         | 0         |
| K04102 | 0         | 0         | 0         | 0         | 0         | 0         | 0         | 0         | 0         | 0         | 0         | 0         | 0         | 0         | 0         | 0         |
| K04116 | 0         | 0         | 0         | 0         | 0         | 0         | 0         | 0         | 0         | 0         | 0         | 0         | 0         | 0         | 0         | 0         |
| K05394 | 0         | 0         | 0         | 1         | 0         | 0         | 0         | 0         | 0         | 0         | 0         | 0         | 0         | 0         | 0         | 0         |

| EC/KO  | CH-NLM022 | CH-NLM023 | CH-NLM024 | CH-NLM025 | CH-NLM026 | CH-NLM027 | CH-NLM028 | CH-NLM029 | CH-NLM031 | CH-NLM032 | CH-NOF001 | CH-NOF002 | CH-NOF004 | CH-NOF005 | CH-NOF006 | CH-NOF007 |
|--------|-----------|-----------|-----------|-----------|-----------|-----------|-----------|-----------|-----------|-----------|-----------|-----------|-----------|-----------|-----------|-----------|
| K05549 | 0         | 0         | 0         | 0         | 0         | 1         | 0         | 0         | 0         | 0         | 0         | 0         | 0         | 0         | 0         | 0         |
| K05783 | 0         | 0         | 0         | 0         | 0         | 1         | 0         | 0         | 0         | 0         | 0         | 0         | 0         | 0         | 0         | 0         |
| K05797 | 0         | 0         | 0         | 0         | 0         | 0         | 0         | 0         | 0         | 0         | 0         | 0         | 0         | 0         | 0         | 0         |
| K06281 | 1         | 3         | 2         | 0         | 0         | 0         | 0         | 0         | 0         | 2         | 0         | 1         | 0         | 0         | 1         | 1         |
| K06446 | 2         | 5         | 3         | 0         | 3         | 3         | 3         | 5         | 3         | 8         | 1         | 3         | 2         | 7         | 1         | 2         |
| K06912 | 0         | 0         | 0         | 0         | 0         | 0         | 0         | 0         | 0         | 0         | 0         | 0         | 0         | 0         | 0         | 0         |
| K07535 | 0         | 0         | 0         | 0         | 0         | 0         | 0         | 0         | 0         | 0         | 0         | 0         | 0         | 0         | 0         | 0         |
| K07536 | 2         | 4         | 2         | 1         | 1         | 2         | 1         | 0         | 3         | 4         | 1         | 1         | 2         | 1         | 2         | 1         |
| K08689 | 0         | 0         | 0         | 0         | 0         | 0         | 0         | 0         | 0         | 0         | 0         | 0         | 0         | 0         | 0         | 0         |
| K08710 | 0         | 0         | 1         | 0         | 0         | 1         | 0         | 0         | 0         | 0         | 0         | 0         | 0         | 0         | 0         | 0         |
| K09461 | 0         | 0         | 0         | 0         | 0         | 1         | 0         | 0         | 0         | 0         | 0         | 0         | 0         | 0         | 0         | 0         |
| K10217 | 0         | 0         | 0         | 0         | 0         | 0         | 0         | 0         | 0         | 0         | 0         | 0         | 0         | 0         | 0         | 0         |
| K10218 | 0         | 0         | 1         | 0         | 1         | 1         | 0         | 0         | 0         | 0         | 0         | 0         | 0         | 1         | 0         | 1         |
| K10220 | 0         | 0         | 0         | 0         | 0         | 0         | 0         | 0         | 0         | 0         | 0         | 0         | 0         | 0         | 0         | 0         |
| K11180 | 0         | 0         | 0         | 0         | 1         | 0         | 0         | 0         | 0         | 0         | 0         | 0         | 0         | 0         | 0         | 0         |
| K13953 | 1         | 1         | 1         | 0         | 0         | 5         | 0         | 1         | 0         | 1         | 0         | 0         | 0         | 1         | 0         | 0         |
| K14333 | 0         | 0         | 0         | 0         | 0         | 1         | 0         | 0         | 0         | 0         | 0         | 0         | 0         | 0         | 0         | 0         |
| K14519 | 0         | 0         | 0         | 0         | 0         | 0         | 0         | 0         | 0         | 0         | 0         | 0         | 0         | 0         | 0         | 0         |
| K15054 | 1         | 1         | 1         | 0         | 0         | 0         | 0         | 0         | 0         | 0         | 0         | 1         | 0         | 0         | 0         | 0         |
| K16173 | 0         | 1         | 1         | 1         | 0         | 0         | 1         | 0         | 0         | 1         | 0         | 0         | 0         | 1         | 0         | 0         |
| K16514 | 0         | 1         | 1         | 0         | 0         | 1         | 0         | 1         | 0         | 0         | 0         | 1         | 0         | 0         | 1         | 0         |
| K16874 | 0         | 0         | 0         | 0         | 0         | 0         | 0         | 0         | 0         | 0         | 0         | 0         | 0         | 0         | 0         | 0         |

| EC/KO      | CH-NOF008 | CH-NOF009 | CH-NOF010 | CH-NOF011 | CH-NOF012 | CH-NOF013 | CH-NOF014 | CH-NOM001 | CH-NOM002 | CH-NOM004 | CH-NOM005 | CH-NOM007 | CH-NOM008 | CH-NOM009 | CH-NOM010 | CH-NOM012 |
|------------|-----------|-----------|-----------|-----------|-----------|-----------|-----------|-----------|-----------|-----------|-----------|-----------|-----------|-----------|-----------|-----------|
| 1.1.1.-    | 47        | 36        | 52        | 30        | 32        | 48        | 27        | 18        | 44        | 40        | 48        | 15        | 25        | 67        | 36        | 25        |
| 1.1.1.1    | 33        | 17        | 30        | 15        | 24        | 39        | 31        | 25        | 50        | 20        | 39        | 20        | 15        | 72        | 30        | 24        |
| 1.1.1.157  | 1         | 1         | 0         | 0         | 0         | 0         | 0         | 1         | 1         | 0         | 0         | 2         | 0         | 0         | 0         | 0         |
| 1.1.1.205  | 25        | 15        | 22        | 10        | 12        | 23        | 17        | 13        | 26        | 14        | 15        | 16        | 16        | 32        | 15        | 16        |
| 1.1.1.35   | 6         | 1         | 0         | 0         | 1         | 0         | 2         | 0         | 3         | 0         | 1         | 2         | 0         | 5         | 1         | 1         |
| 1.12.99.6  | 1         | 2         | 1         | 0         | 0         | 0         | 0         | 1         | 1         | 2         | 2         | 0         | 2         | 0         | 0         | 0         |
| 1.13.11.-  | 0         | 0         | 0         | 0         | 0         | 0         | 0         | 0         | 0         | 0         | 0         | 0         | 0         | 0         | 0         | 0         |
| 1.13.11.1  | 0         | 0         | 0         | 0         | 0         | 0         | 0         | 0         | 0         | 0         | 0         | 0         | 0         | 0         | 0         | 0         |
| 1.13.11.2  | 0         | 0         | 0         | 0         | 0         | 0         | 0         | 0         | 0         | 0         | 0         | 0         | 0         | 0         | 0         | 0         |
| 1.13.11.3  | 0         | 0         | 0         | 0         | 0         | 0         | 0         | 0         | 0         | 0         | 0         | 0         | 0         | 0         | 0         | 0         |
| 1.13.11.39 | 0         | 0         | 0         | 0         | 0         | 0         | 0         | 0         | 0         | 0         | 0         | 0         | 0         | 0         | 0         | 0         |
| 1.13.11.5  | 0         | 0         | 0         | 0         | 0         | 0         | 0         | 0         | 0         | 0         | 0         | 0         | 0         | 0         | 0         | 0         |
| 1.13.11.8  | 0         | 0         | 0         | 0         | 0         | 0         | 0         | 0         | 0         | 0         | 0         | 0         | 0         | 0         | 0         | 0         |
| 1.14.12.10 | 0         | 0         | 0         | 0         | 1         | 0         | 0         | 0         | 0         | 0         | 1         | 0         | 0         | 0         | 1         | 0         |
| 1.14.12.13 | 0         | 0         | 0         | 0         | 0         | 0         | 0         | 0         | 0         | 0         | 0         | 0         | 0         | 0         | 0         | 0         |
| 1.14.12.18 | 0         | 0         | 0         | 0         | 0         | 0         | 0         | 0         | 0         | 0         | 0         | 0         | 0         | 0         | 0         | 0         |
| 1.14.13.-  | 0         | 0         | 0         | 0         | 0         | 0         | 0         | 0         | 1         | 1         | 2         | 0         | 0         | 0         | 0         | 0         |
| 1.14.13.1  | 0         | 0         | 0         | 0         | 0         | 0         | 0         | 0         | 0         | 0         | 0         | 0         | 0         | 0         | 0         | 0         |
| 1.14.13.2  | 0         | 0         | 0         | 0         | 0         | 0         | 0         | 0         | 0         | 0         | 0         | 0         | 0         | 0         | 0         | 0         |
| 1.14.13.50 | 0         | 0         | 0         | 0         | 0         | 0         | 0         | 0         | 0         | 0         | 0         | 0         | 0         | 0         | 0         | 0         |
| 1.14.13.7  | 0         | 0         | 0         | 0         | 0         | 0         | 0         | 0         | 1         | 0         | 0         | 0         | 0         | 0         | 0         | 0         |
| 1.14.13.8  | 0         | 0         | 0         | 0         | 0         | 0         | 0         | 0         | 0         | 0         | 0         | 0         | 0         | 0         | 0         | 0         |
| 1.14.13.82 | 0         | 0         | 0         | 0         | 0         | 0         | 0         | 0         | 0         | 0         | 0         | 0         | 0         | 0         | 0         | 0         |
| 1.14.99.-  | 0         | 0         | 0         | 0         | 0         | 0         | 0         | 0         | 0         | 0         | 0         | 0         | 0         | 0         | 0         | 0         |
| 1.17.99.1  | 0         | 0         | 0         | 0         | 0         | 0         | 0         | 0         | 0         | 0         | 0         | 0         | 0         | 0         | 0         | 0         |
| 1.18.6.1   | 0         | 0         | 0         | 0         | 1         | 0         | 0         | 0         | 0         | 0         | 0         | 0         | 0         | 0         | 0         | 0         |
| 1.2.1.-    | 0         | 0         | 0         | 0         | 0         | 0         | 0         | 0         | 1         | 0         | 1         | 0         | 0         | 0         | 0         | 0         |
| 1.2.1.10   | 7         | 1         | 1         | 0         | 3         | 2         | 3         | 2         | 11        | 5         | 9         | 4         | 1         | 12        | 4         | 3         |
| 1.2.1.3    | 4         | 3         | 3         | 3         | 6         | 2         | 5         | 4         | 12        | 5         | 7         | 1         | 2         | 9         | 5         | 5         |
| 1.2.1.39   | 0         | 0         | 0         | 0         | 0         | 0         | 0         | 0         | 0         | 0         | 1         | 0         | 0         | 0         | 0         | 0         |
| 1.2.7.1    | 17        | 9         | 12        | 7         | 11        | 7         | 7         | 2         | 7         | 3         | 3         | 9         | 2         | 6         | 10        | 5         |
| 1.2.99.2   | 3         | 0         | 2         | 0         | 0         | 1         | 4         | 1         | 5         | 2         | 6         | 1         | 0         | 7         | 1         | 1         |
| 1.3.1.-    | 0         | 1         | 2         | 0         | 2         | 2         | 1         | 0         | 0         | 0         | 1         | 1         | 2         | 0         | 1         | 1         |
| 1.3.1.2    | 1         | 2         | 1         | 0         | 0         | 0         | 0         | 0         | 1         | 1         | 0         | 0         | 0         | 0         | 0         | 0         |
| 1.3.1.25   | 0         | 0         | 0         | 0         | 0         | 0         | 0         | 0         | 0         | 0         | 0         | 0         | 0         | 0         | 0         | 0         |
| 1.3.99.-   | 0         | 0         | 1         | 0         | 0         | 0         | 0         | 0         | 0         | 1         | 1         | 0         | 0         | 0         | 0         | 0         |
| 1.6.5.-    | 63        | 27        | 51        | 28        | 27        | 50        | 33        | 13        | 29        | 23        | 34        | 22        | 38        | 35        | 38        | 35        |
| 1.7.1.-    | 8         | 5         | 13        | 4         | 10        | 10        | 8         | 5         | 9         | 4         | 7         | 5         | 6         | 11        | 8         | 10        |
| 1.8.99.3   | 0         | 0         | 0         | 0         | 0         | 0         | 0         | 0         | 0         | 1         | 0         | 0         | 0         | 0         | 0         | 0         |
| 2.1.1.-    | 268       | 102       | 192       | 92        | 146       | 171       | 199       | 89        | 217       | 126       | 227       | 149       | 113       | 298       | 153       | 136       |
| 2.3.1.-    | 169       | 89        | 123       | 94        | 105       | 153       | 122       | 46        | 107       | 87        | 99        | 93        | 89        | 121       | 112       | 102       |
| 2.3.1.16   | 5         | 2         | 1         | 1         | 2         | 3         | 5         | 1         | 1         | 1         | 1         | 1         | 1         | 2         | 3         | 2         |
| 2.3.1.5    | 0         | 0         | 0         | 0         | 0         | 0         | 0         | 0         | 0         | 1         | 1         | 0         | 0         | 0         | 0         | 0         |
| 2.3.1.9    | 1         | 1         | 2         | 0         | 0         | 0         | 1         | 0         | 3         | 2         | 2         | 1         | 0         | 1         | 0         | 0         |
| 2.4.2.10   | 12        | 7         | 11        | 2         | 9         | 8         | 11        | 7         | 13        | 10        | 13        | 10        | 7         | 15        | 12        | 13        |
| 2.4.2.3    | 10        | 2         | 3         | 2         | 4         | 5         | 7         | 3         | 11        | 6         | 10        | 8         | 1         | 15        | 4         | 3         |
| 2.4.2.4    | 5         | 0         | 0         | 0         | 3         | 2         | 4         | 1         | 5         | 1         | 2         | 4         | 0         | 5         | 4         | 3         |
| 2.4.2.8    | 13        | 7         | 9         | 5         | 7         | 10        | 13        | 6         | 19        | 6         | 12        | 9         | 5         | 15        | 8         | 9         |
| 2.5.1.-    | 21        | 17        | 25        | 13        | 15        | 25        | 12        | 6         | 13        | 14        | 12        | 10        | 16        | 13        | 17        | 16        |

| EC/KO    | CH-NOF008 | CH-NOF009 | CH-NOF010 | CH-NOF011 | CH-NOF012 | CH-NOF013 | CH-NOF014 | CH-NOM001 | CH-NOM002 | CH-NOM004 | CH-NOM005 | CH-NOM007 | CH-NOM008 | CH-NOM009 | CH-NOM010 | CH-NOM012 |
|----------|-----------|-----------|-----------|-----------|-----------|-----------|-----------|-----------|-----------|-----------|-----------|-----------|-----------|-----------|-----------|-----------|
| 2.5.1.18 | 0         | 0         | 4         | 0         | 1         | 1         | 4         | 1         | 0         | 3         | 6         | 1         | 0         | 4         | 0         | 0         |
| 2.6.1.-  | 32        | 17        | 30        | 23        | 22        | 34        | 33        | 8         | 33        | 23        | 24        | 14        | 18        | 32        | 23        | 14        |
| 2.7.1.21 | 6         | 5         | 5         | 5         | 5         | 8         | 2         | 1         | 2         | 3         | 2         | 5         | 4         | 3         | 8         | 7         |
| 2.7.1.48 | 31        | 10        | 23        | 15        | 14        | 25        | 33        | 5         | 19        | 15        | 19        | 19        | 11        | 32        | 24        | 17        |
| 2.7.4.-  | 17        | 7         | 12        | 7         | 9         | 11        | 8         | 5         | 13        | 7         | 9         | 9         | 8         | 16        | 10        | 8         |
| 2.8.3.-  | 1         | 2         | 1         | 1         | 2         | 1         | 2         | 1         | 1         | 3         | 0         | 0         | 2         | 1         | 2         | 2         |
| 2.8.3.1  | 0         | 0         | 0         | 0         | 0         | 0         | 0         | 0         | 0         | 0         | 0         | 0         | 0         | 0         | 0         | 0         |
| 2.8.3.12 | 0         | 0         | 0         | 1         | 1         | 0         | 0         | 0         | 1         | 0         | 0         | 0         | 0         | 0         | 0         | 0         |
| 2.8.3.6  | 0         | 0         | 0         | 0         | 0         | 1         | 0         | 0         | 0         | 1         | 0         | 0         | 0         | 0         | 1         | 0         |
| 2.8.3.8  | 1         | 0         | 0         | 0         | 1         | 0         | 2         | 1         | 2         | 2         | 2         | 0         | 0         | 9         | 0         | 0         |
| 3.1.1.-  | 3         | 4         | 6         | 2         | 3         | 5         | 3         | 3         | 9         | 6         | 5         | 3         | 4         | 3         | 2         | 5         |
| 3.1.1.1  | 3         | 7         | 8         | 5         | 7         | 8         | 3         | 3         | 8         | 2         | 6         | 2         | 5         | 3         | 4         | 3         |
| 3.1.1.17 | 2         | 3         | 2         | 2         | 3         | 1         | 1         | 0         | 2         | 1         | 1         | 0         | 3         | 0         | 2         | 0         |
| 3.1.1.2  | 0         | 0         | 1         | 0         | 0         | 0         | 3         | 0         | 0         | 1         | 1         | 1         | 0         | 0         | 0         | 0         |
| 3.1.1.24 | 2         | 0         | 4         | 0         | 1         | 2         | 2         | 1         | 2         | 4         | 3         | 2         | 0         | 4         | 2         | 1         |
| 3.1.1.45 | 0         | 0         | 1         | 0         | 0         | 0         | 0         | 0         | 0         | 1         | 1         | 0         | 0         | 0         | 0         | 0         |
| 3.1.2.-  | 1         | 0         | 0         | 1         | 0         | 1         | 0         | 0         | 1         | 3         | 2         | 0         | 0         | 0         | 1         | 0         |
| 3.1.2.23 | 3         | 3         | 7         | 3         | 4         | 5         | 4         | 1         | 2         | 1         | 1         | 2         | 4         | 0         | 7         | 5         |
| 3.1.3.1  | 15        | 16        | 21        | 15        | 12        | 18        | 6         | 6         | 14        | 15        | 8         | 11        | 18        | 10        | 16        | 5         |
| 3.1.3.2  | 6         | 7         | 7         | 4         | 5         | 8         | 3         | 1         | 2         | 5         | 4         | 5         | 7         | 4         | 8         | 2         |
| 3.1.3.41 | 0         | 0         | 0         | 0         | 0         | 0         | 0         | 0         | 0         | 0         | 0         | 0         | 0         | 0         | 0         | 0         |
| 3.2.1.31 | 3         | 0         | 1         | 0         | 2         | 1         | 2         | 5         | 8         | 1         | 11        | 0         | 4         | 6         | 3         | 2         |
| 3.3.2.9  | 0         | 0         | 0         | 0         | 0         | 0         | 0         | 0         | 0         | 0         | 0         | 0         | 0         | 0         | 0         | 0         |
| 3.5.1.-  | 22        | 4         | 16        | 7         | 8         | 16        | 20        | 7         | 20        | 11        | 12        | 15        | 5         | 22        | 13        | 15        |
| 3.5.1.4  | 6         | 2         | 3         | 1         | 1         | 1         | 1         | 2         | 1         | 5         | 1         | 4         | 1         | 2         | 1         | 1         |
| 3.5.1.5  | 0         | 1         | 1         | 0         | 0         | 0         | 1         | 0         | 2         | 0         | 1         | 0         | 0         | 2         | 0         | 0         |
| 3.5.1.54 | 1         | 0         | 0         | 1         | 0         | 0         | 1         | 0         | 4         | 3         | 4         | 0         | 1         | 3         | 2         | 1         |
| 3.5.1.6  | 1         | 2         | 1         | 0         | 0         | 0         | 0         | 0         | 2         | 1         | 0         | 0         | 1         | 3         | 1         | 1         |
| 3.5.2.-  | 0         | 0         | 0         | 0         | 0         | 0         | 0         | 0         | 0         | 0         | 0         | 0         | 0         | 0         | 0         | 0         |
| 3.5.2.2  | 1         | 2         | 1         | 0         | 0         | 0         | 1         | 0         | 4         | 1         | 1         | 1         | 0         | 4         | 0         | 0         |
| 3.5.4.-  | 21        | 7         | 19        | 11        | 12        | 14        | 17        | 10        | 13        | 8         | 15        | 15        | 9         | 21        | 17        | 12        |
| 3.5.4.5  | 13        | 5         | 13        | 7         | 12        | 7         | 10        | 4         | 9         | 7         | 6         | 9         | 8         | 13        | 7         | 8         |
| 3.5.5.1  | 0         | 1         | 0         | 0         | 0         | 0         | 0         | 0         | 0         | 2         | 0         | 0         | 1         | 0         | 0         | 0         |
| 3.5.5.7  | 0         | 0         | 0         | 0         | 0         | 0         | 0         | 0         | 0         | 0         | 0         | 0         | 0         | 0         | 0         | 0         |
| 3.5.99.3 | 0         | 0         | 0         | 0         | 0         | 0         | 0         | 0         | 1         | 0         | 0         | 0         | 0         | 0         | 0         | 0         |
| 3.6.1.7  | 3         | 0         | 2         | 2         | 1         | 0         | 3         | 1         | 8         | 2         | 4         | 1         | 1         | 12        | 1         | 0         |
| 3.7.1.-  | 1         | 0         | 0         | 1         | 0         | 0         | 1         | 2         | 1         | 0         | 2         | 2         | 1         | 5         | 0         | 1         |
| 3.7.1.2  | 6         | 5         | 7         | 6         | 3         | 4         | 2         | 1         | 2         | 4         | 1         | 2         | 5         | 2         | 6         | 2         |
| 3.8.1.2  | 6         | 4         | 10        | 5         | 3         | 5         | 7         | 1         | 11        | 7         | 6         | 4         | 5         | 7         | 8         | 6         |
| 3.8.1.3  | 0         | 0         | 0         | 0         | 0         | 0         | 0         | 0         | 0         | 1         | 0         | 0         | 0         | 0         | 0         | 0         |
| 3.8.1.5  | 0         | 1         | 0         | 0         | 0         | 0         | 0         | 0         | 1         | 0         | 0         | 0         | 0         | 0         | 0         | 0         |
| 4.1.1.-  | 13        | 8         | 11        | 8         | 8         | 11        | 5         | 4         | 8         | 11        | 8         | 5         | 8         | 7         | 9         | 6         |
| 4.1.1.44 | 14        | 16        | 19        | 12        | 12        | 21        | 15        | 10        | 18        | 9         | 10        | 10        | 14        | 20        | 14        | 12        |
| 4.1.1.55 | 0         | 0         | 0         | 0         | 0         | 0         | 0         | 0         | 0         | 0         | 0         | 0         | 0         | 0         | 0         | 0         |
| 4.1.1.7  | 0         | 0         | 0         | 0         | 0         | 0         | 0         | 0         | 0         | 0         | 0         | 0         | 0         | 0         | 0         | 0         |
| 4.1.1.70 | 1         | 1         | 0         | 0         | 0         | 0         | 0         | 0         | 0         | 2         | 0         | 0         | 0         | 0         | 0         | 0         |
| 4.1.1.77 | 0         | 0         | 0         | 0         | 0         | 0         | 0         | 0         | 0         | 0         | 0         | 0         | 0         | 0         | 0         | 0         |
| 4.1.2.-  | 7         | 2         | 4         | 3         | 6         | 2         | 1         | 5         | 6         | 5         | 5         | 3         | 1         | 11        | 3         | 2         |
| 4.1.3.-  | 27        | 6         | 15        | 9         | 14        | 14        | 19        | 5         | 17        | 12        | 20        | 7         | 8         | 18        | 15        | 10        |

| EC/KO    | CH-NOF008 | CH-NOF009 | CH-NOF010 | CH-NOF011 | CH-NOF012 | CH-NOF013 | CH-NOF014 | CH-NOM001 | CH-NOM002 | CH-NOM004 | CH-NOM005 | CH-NOM007 | CH-NOM008 | CH-NOM009 | CH-NOM010 | CH-NOM012 |
|----------|-----------|-----------|-----------|-----------|-----------|-----------|-----------|-----------|-----------|-----------|-----------|-----------|-----------|-----------|-----------|-----------|
| 4.1.3.39 | 0         | 1         | 1         | 1         | 0         | 1         | 0         | 0         | 0         | 0         | 0         | 0         | 0         | 0         | 0         | 0         |
| 4.1.99.- | 4         | 1         | 2         | 0         | 2         | 1         | 0         | 1         | 0         | 1         | 3         | 3         | 0         | 1         | 3         | 0         |
| 4.2.1.-  | 57        | 36        | 52        | 30        | 28        | 48        | 30        | 14        | 40        | 43        | 33        | 29        | 39        | 38        | 33        | 25        |
| 4.2.1.17 | 1         | 4         | 8         | 2         | 3         | 6         | 0         | 4         | 5         | 3         | 4         | 1         | 2         | 6         | 2         | 2         |
| 4.2.1.80 | 0         | 0         | 0         | 0         | 0         | 1         | 0         | 0         | 0         | 1         | 0         | 0         | 0         | 0         | 1         | 0         |
| 4.2.1.83 | 0         | 0         | 0         | 0         | 0         | 0         | 0         | 0         | 0         | 0         | 0         | 2         | 0         | 0         | 0         | 0         |
| 4.2.1.84 | 0         | 0         | 0         | 0         | 0         | 1         | 2         | 0         | 0         | 0         | 1         | 0         | 0         | 0         | 0         | 0         |
| 5.1.2.2  | 0         | 0         | 0         | 0         | 0         | 0         | 0         | 0         | 0         | 0         | 0         | 0         | 0         | 0         | 0         | 0         |
| 5.2.1.2  | 0         | 0         | 0         | 0         | 0         | 0         | 0         | 0         | 0         | 0         | 0         | 0         | 0         | 0         | 0         | 0         |
| 5.3.3.4  | 0         | 0         | 0         | 0         | 0         | 0         | 0         | 0         | 0         | 0         | 0         | 0         | 0         | 0         | 0         | 0         |
| 5.3.99.- | 0         | 1         | 2         | 0         | 1         | 0         | 2         | 0         | 5         | 2         | 5         | 1         | 1         | 8         | 0         | 4         |
| 5.4.99.- | 1         | 1         | 0         | 0         | 1         | 0         | 0         | 0         | 0         | 0         | 0         | 0         | 0         | 0         | 1         | 1         |
| 5.5.1.1  | 2         | 4         | 5         | 5         | 2         | 6         | 3         | 2         | 2         | 4         | 2         | 2         | 4         | 3         | 6         | 0         |
| 5.5.1.2  | 0         | 0         | 0         | 0         | 0         | 0         | 0         | 0         | 0         | 0         | 0         | 0         | 0         | 0         | 0         | 0         |
| 6.2.1.-  | 0         | 0         | 0         | 0         | 0         | 0         | 0         | 0         | 0         | 0         | 0         | 0         | 0         | 0         | 0         | 0         |
| 6.3.5.2  | 24        | 8         | 17        | 7         | 12        | 14        | 18        | 7         | 21        | 13        | 21        | 15        | 14        | 22        | 12        | 12        |
| K00002   | 2         | 0         | 0         | 0         | 1         | 0         | 1         | 1         | 2         | 0         | 2         | 0         | 0         | 2         | 0         | 0         |
| K00055   | 0         | 0         | 0         | 0         | 0         | 0         | 0         | 0         | 0         | 0         | 0         | 0         | 0         | 0         | 0         | 0         |
| K00074   | 11        | 5         | 0         | 3         | 1         | 3         | 3         | 4         | 6         | 0         | 6         | 4         | 0         | 4         | 5         | 1         |
| K00088   | 25        | 15        | 21        | 10        | 9         | 19        | 17        | 10        | 18        | 15        | 12        | 10        | 14        | 26        | 14        | 13        |
| K00100   | 53        | 24        | 47        | 26        | 31        | 46        | 28        | 18        | 42        | 38        | 41        | 21        | 31        | 49        | 27        | 18        |
| K00128   | 1         | 0         | 0         | 0         | 1         | 0         | 1         | 1         | 4         | 1         | 2         | 0         | 0         | 2         | 1         | 1         |
| K00129   | 0         | 0         | 0         | 0         | 0         | 0         | 0         | 0         | 0         | 0         | 0         | 0         | 0         | 0         | 0         | 0         |
| K00132   | 1         | 1         | 0         | 0         | 0         | 0         | 0         | 0         | 0         | 1         | 0         | 0         | 0         | 0         | 0         | 0         |
| K00141   | 0         | 0         | 0         | 0         | 0         | 0         | 0         | 0         | 0         | 0         | 0         | 0         | 0         | 0         | 0         | 0         |
| K00146   | 0         | 0         | 0         | 0         | 0         | 0         | 0         | 0         | 0         | 0         | 1         | 0         | 0         | 0         | 0         | 0         |
| K00148   | 0         | 0         | 0         | 0         | 0         | 0         | 0         | 0         | 0         | 0         | 0         | 0         | 0         | 0         | 0         | 0         |
| K00155   | 0         | 0         | 0         | 0         | 0         | 0         | 0         | 0         | 0         | 0         | 1         | 0         | 1         | 0         | 0         | 0         |
| K00169   | 5         | 1         | 1         | 0         | 1         | 2         | 1         | 0         | 4         | 1         | 0         | 2         | 0         | 3         | 2         | 0         |
| K00224   | 0         | 1         | 1         | 0         | 0         | 0         | 0         | 0         | 0         | 1         | 0         | 0         | 0         | 0         | 0         | 0         |
| K00274   | 0         | 0         | 0         | 0         | 0         | 0         | 0         | 0         | 0         | 0         | 0         | 0         | 0         | 0         | 0         | 0         |
| K00446   | 0         | 0         | 0         | 0         | 0         | 0         | 0         | 0         | 0         | 0         | 0         | 0         | 0         | 0         | 0         | 0         |
| K00448   | 0         | 0         | 0         | 0         | 0         | 0         | 0         | 0         | 0         | 0         | 0         | 0         | 0         | 0         | 0         | 0         |
| K00462   | 0         | 2         | 0         | 1         | 1         | 1         | 0         | 1         | 1         | 1         | 1         | 0         | 0         | 0         | 0         | 0         |
| K00480   | 0         | 0         | 0         | 0         | 0         | 0         | 0         | 0         | 0         | 0         | 0         | 0         | 0         | 0         | 0         | 0         |
| K00481   | 0         | 0         | 0         | 0         | 0         | 0         | 0         | 0         | 0         | 0         | 0         | 0         | 0         | 0         | 0         | 0         |
| K00539   | 0         | 1         | 1         | 0         | 0         | 0         | 0         | 0         | 0         | 0         | 0         | 0         | 0         | 0         | 0         | 0         |
| K00599   | 41        | 19        | 31        | 15        | 21        | 43        | 38        | 19        | 42        | 23        | 39        | 25        | 16        | 57        | 30        | 20        |
| K00626   | 9         | 3         | 6         | 2         | 3         | 5         | 6         | 2         | 7         | 3         | 3         | 2         | 1         | 5         | 5         | 2         |
| K00632   | 0         | 0         | 0         | 0         | 0         | 0         | 0         | 0         | 0         | 0         | 1         | 0         | 0         | 0         | 0         | 0         |
| K00680   | 36        | 28        | 39        | 21        | 23        | 44        | 25        | 15        | 21        | 26        | 34        | 14        | 25        | 22        | 20        | 27        |
| K00757   | 12        | 8         | 9         | 6         | 5         | 12        | 9         | 6         | 9         | 8         | 6         | 4         | 6         | 12        | 7         | 5         |
| K00758   | 3         | 0         | 1         | 0         | 2         | 1         | 0         | 0         | 1         | 3         | 1         | 2         | 2         | 2         | 0         | 0         |
| K00760   | 20        | 7         | 16        | 6         | 10        | 12        | 17        | 7         | 23        | 5         | 17        | 10        | 9         | 20        | 14        | 11        |
| K00799   | 0         | 0         | 1         | 0         | 0         | 0         | 0         | 0         | 0         | 1         | 4         | 0         | 0         | 0         | 0         | 0         |
| K00857   | 14        | 5         | 9         | 8         | 7         | 12        | 5         | 3         | 3         | 3         | 5         | 8         | 6         | 9         | 11        | 8         |
| K00876   | 31        | 9         | 24        | 14        | 18        | 23        | 23        | 9         | 19        | 13        | 17        | 18        | 14        | 29        | 26        | 16        |
| K01026   | 0         | 2         | 1         | 0         | 0         | 0         | 0         | 1         | 1         | 3         | 0         | 0         | 0         | 4         | 0         | 0         |
| K01031   | 0         | 0         | 0         | 0         | 0         | 0         | 0         | 0         | 0         | 0         | 0         | 0         | 0         | 0         | 0         | 0         |

| EC/KO  | CH-NOF008 | CH-NOF009 | CH-NOF010 | CH-NOF011 | CH-NOF012 | CH-NOF013 | CH-NOF014 | CH-NOM001 | CH-NOM002 | CH-NOM004 | CH-NOM005 | CH-NOM007 | CH-NOM008 | CH-NOM009 | CH-NOM010 | CH-NOM012 |
|--------|-----------|-----------|-----------|-----------|-----------|-----------|-----------|-----------|-----------|-----------|-----------|-----------|-----------|-----------|-----------|-----------|
| K01034 | 3         | 1         | 0         | 1         | 0         | 0         | 1         | 0         | 0         | 0         | 1         | 0         | 0         | 0         | 0         | 0         |
| K01039 | 0         | 0         | 0         | 0         | 0         | 0         | 0         | 0         | 0         | 0         | 0         | 0         | 0         | 0         | 0         | 0         |
| K01041 | 7         | 8         | 8         | 8         | 4         | 7         | 4         | 3         | 4         | 5         | 5         | 4         | 7         | 5         | 5         | 3         |
| K01053 | 0         | 0         | 0         | 0         | 0         | 0         | 0         | 0         | 0         | 0         | 0         | 0         | 0         | 0         | 0         | 0         |
| K01055 | 0         | 0         | 0         | 0         | 0         | 0         | 0         | 0         | 0         | 0         | 0         | 0         | 0         | 0         | 0         | 0         |
| K01061 | 0         | 0         | 1         | 0         | 0         | 0         | 0         | 0         | 0         | 1         | 1         | 0         | 0         | 0         | 0         | 0         |
| K01066 | 2         | 2         | 5         | 5         | 5         | 7         | 3         | 2         | 6         | 3         | 7         | 2         | 2         | 3         | 4         | 2         |
| K01075 | 0         | 0         | 0         | 0         | 0         | 0         | 0         | 0         | 0         | 1         | 2         | 0         | 0         | 0         | 0         | 0         |
| K01077 | 11        | 11        | 11        | 8         | 9         | 9         | 2         | 2         | 7         | 9         | 4         | 4         | 11        | 5         | 10        | 1         |
| K01101 | 5         | 2         | 1         | 2         | 2         | 0         | 3         | 0         | 4         | 1         | 0         | 0         | 2         | 1         | 1         | 3         |
| K01195 | 6         | 3         | 7         | 7         | 2         | 8         | 5         | 3         | 6         | 4         | 10        | 2         | 6         | 6         | 10        | 3         |
| K01426 | 1         | 2         | 0         | 1         | 0         | 1         | 1         | 0         | 1         | 2         | 0         | 0         | 1         | 0         | 1         | 1         |
| K01428 | 0         | 0         | 1         | 0         | 0         | 0         | 1         | 0         | 3         | 0         | 0         | 0         | 0         | 2         | 0         | 0         |
| K01457 | 0         | 0         | 0         | 0         | 0         | 0         | 0         | 0         | 0         | 0         | 0         | 0         | 0         | 0         | 0         | 0         |
| K01464 | 2         | 2         | 1         | 0         | 0         | 0         | 1         | 1         | 5         | 5         | 2         | 1         | 0         | 4         | 0         | 0         |
| K01489 | 22        | 7         | 14        | 12        | 15        | 10        | 12        | 4         | 9         | 8         | 9         | 7         | 12        | 14        | 13        | 11        |
| K01500 | 0         | 0         | 0         | 0         | 0         | 0         | 1         | 0         | 0         | 0         | 0         | 0         | 0         | 0         | 0         | 0         |
| K01501 | 2         | 2         | 0         | 1         | 0         | 0         | 0         | 0         | 1         | 2         | 1         | 0         | 0         | 3         | 0         | 0         |
| K01502 | 0         | 0         | 0         | 0         | 0         | 0         | 0         | 0         | 0         | 0         | 0         | 0         | 0         | 0         | 0         | 0         |
| K01512 | 4         | 1         | 4         | 2         | 1         | 1         | 3         | 1         | 8         | 3         | 6         | 1         | 1         | 16        | 4         | 0         |
| K01560 | 6         | 1         | 2         | 1         | 0         | 3         | 4         | 2         | 3         | 0         | 3         | 2         | 0         | 8         | 3         | 1         |
| K01561 | 1         | 1         | 0         | 1         | 0         | 1         | 0         | 0         | 0         | 0         | 0         | 0         | 1         | 0         | 1         | 1         |
| K01563 | 0         | 0         | 0         | 0         | 0         | 0         | 0         | 0         | 0         | 0         | 0         | 0         | 0         | 0         | 0         | 0         |
| K01564 | 1         | 1         | 1         | 0         | 2         | 0         | 1         | 1         | 1         | 0         | 1         | 0         | 1         | 0         | 1         | 0         |
| K01607 | 9         | 7         | 11        | 6         | 9         | 8         | 7         | 3         | 10        | 5         | 3         | 7         | 5         | 6         | 6         | 5         |
| K01612 | 0         | 0         | 0         | 0         | 0         | 0         | 0         | 0         | 0         | 0         | 0         | 0         | 0         | 0         | 0         | 0         |
| K01615 | 27        | 10        | 23        | 12        | 8         | 12        | 15        | 7         | 13        | 9         | 12        | 5         | 10        | 18        | 19        | 10        |
| K01617 | 0         | 0         | 0         | 0         | 0         | 0         | 0         | 0         | 0         | 0         | 0         | 0         | 0         | 0         | 0         | 0         |
| K01666 | 7         | 1         | 3         | 1         | 3         | 5         | 5         | 4         | 6         | 3         | 6         | 1         | 2         | 4         | 4         | 3         |
| K01692 | 0         | 0         | 0         | 0         | 0         | 0         | 0         | 0         | 0         | 0         | 0         | 0         | 0         | 0         | 0         | 0         |
| K01721 | 0         | 0         | 0         | 0         | 0         | 0         | 0         | 0         | 0         | 0         | 0         | 0         | 0         | 0         | 0         | 0         |
| K01726 | 6         | 6         | 11        | 4         | 3         | 8         | 5         | 1         | 6         | 10        | 3         | 3         | 9         | 6         | 5         | 6         |
| K01781 | 0         | 1         | 1         | 0         | 0         | 0         | 0         | 0         | 1         | 0         | 1         | 0         | 1         | 0         | 0         | 0         |
| K01821 | 0         | 2         | 1         | 1         | 2         | 0         | 2         | 0         | 1         | 1         | 1         | 2         | 1         | 0         | 1         | 1         |
| K01856 | 0         | 0         | 0         | 0         | 0         | 0         | 0         | 0         | 0         | 0         | 0         | 0         | 0         | 0         | 0         | 0         |
| K01857 | 0         | 0         | 1         | 0         | 1         | 0         | 0         | 1         | 0         | 0         | 0         | 0         | 0         | 0         | 0         | 0         |
| K01913 | 0         | 0         | 0         | 0         | 0         | 0         | 0         | 0         | 1         | 0         | 0         | 0         | 0         | 1         | 0         | 0         |
| K01951 | 22        | 8         | 16        | 8         | 11        | 16        | 16        | 7         | 21        | 10        | 14        | 11        | 10        | 19        | 15        | 7         |
| K02554 | 0         | 0         | 0         | 0         | 0         | 0         | 0         | 0         | 0         | 1         | 0         | 0         | 0         | 0         | 0         | 0         |
| K03381 | 0         | 0         | 0         | 0         | 0         | 0         | 0         | 0         | 0         | 0         | 0         | 0         | 0         | 0         | 0         | 0         |
| K03382 | 2         | 0         | 0         | 0         | 0         | 0         | 0         | 0         | 1         | 0         | 0         | 0         | 0         | 0         | 0         | 0         |
| K03464 | 0         | 0         | 0         | 0         | 0         | 0         | 0         | 0         | 0         | 0         | 0         | 0         | 0         | 0         | 0         | 0         |
| K03518 | 8         | 1         | 5         | 3         | 1         | 3         | 6         | 3         | 17        | 6         | 14        | 1         | 1         | 23        | 2         | 0         |
| K03862 | 0         | 0         | 0         | 0         | 0         | 0         | 0         | 0         | 0         | 0         | 0         | 0         | 0         | 0         | 0         | 0         |
| K04099 | 0         | 0         | 0         | 0         | 0         | 0         | 0         | 0         | 0         | 0         | 0         | 0         | 0         | 0         | 0         | 0         |
| K04100 | 0         | 0         | 0         | 0         | 0         | 0         | 0         | 0         | 0         | 0         | 0         | 0         | 0         | 0         | 0         | 0         |
| K04102 | 0         | 0         | 0         | 0         | 0         | 0         | 0         | 0         | 0         | 0         | 0         | 0         | 0         | 0         | 0         | 0         |
| K04116 | 0         | 0         | 0         | 0         | 0         | 0         | 0         | 0         | 0         | 0         | 0         | 0         | 0         | 0         | 0         | 0         |
| K05394 | 0         | 0         | 2         | 0         | 1         | 0         | 0         | 0         | 0         | 0         | 0         | 0         | 0         | 0         | 0         | 0         |



| EC/KO  | CH-NOF008 | CH-NOF009 | CH-NOF010 | CH-NOF011 | CH-NOF012 | CH-NOF013 | CH-NOF014 | CH-NOM001 | CH-NOM002 | CH-NOM004 | CH-NOM005 | CH-NOM007 | CH-NOM008 | CH-NOM009 | CH-NOM010 | CH-NOM012 |
|--------|-----------|-----------|-----------|-----------|-----------|-----------|-----------|-----------|-----------|-----------|-----------|-----------|-----------|-----------|-----------|-----------|
| K05549 | 0         | 0         | 0         | 0         | 0         | 0         | 0         | 0         | 0         | 0         | 0         | 0         | 0         | 0         | 0         | 0         |
| K05783 | 0         | 0         | 0         | 0         | 0         | 0         | 0         | 0         | 0         | 0         | 0         | 0         | 0         | 0         | 0         | 0         |
| K05797 | 0         | 0         | 0         | 0         | 0         | 0         | 0         | 0         | 0         | 0         | 0         | 0         | 0         | 0         | 0         | 0         |
| K06281 | 1         | 2         | 1         | 0         | 0         | 0         | 0         | 1         | 1         | 1         | 0         | 0         | 1         | 0         | 0         | 0         |
| K06446 | 5         | 2         | 2         | 2         | 5         | 3         | 1         | 3         | 7         | 3         | 5         | 2         | 3         | 6         | 4         | 2         |
| K06912 | 0         | 0         | 0         | 0         | 0         | 0         | 0         | 0         | 0         | 0         | 0         | 0         | 0         | 0         | 0         | 0         |
| K07535 | 0         | 0         | 0         | 0         | 0         | 0         | 0         | 0         | 0         | 0         | 0         | 0         | 0         | 0         | 0         | 0         |
| K07536 | 2         | 1         | 3         | 0         | 1         | 3         | 0         | 1         | 1         | 0         | 1         | 0         | 2         | 0         | 2         | 0         |
| K08689 | 0         | 0         | 0         | 0         | 0         | 0         | 0         | 0         | 0         | 0         | 0         | 0         | 0         | 0         | 0         | 0         |
| K08710 | 0         | 0         | 0         | 0         | 0         | 0         | 0         | 0         | 0         | 0         | 0         | 0         | 0         | 0         | 0         | 0         |
| K09461 | 0         | 0         | 0         | 0         | 0         | 0         | 0         | 0         | 1         | 0         | 0         | 0         | 0         | 0         | 0         | 0         |
| K10217 | 0         | 0         | 0         | 0         | 0         | 0         | 0         | 0         | 0         | 0         | 0         | 0         | 0         | 0         | 0         | 0         |
| K10218 | 0         | 0         | 0         | 0         | 0         | 0         | 0         | 0         | 1         | 1         | 0         | 0         | 0         | 0         | 0         | 0         |
| K10220 | 0         | 0         | 0         | 0         | 0         | 0         | 0         | 0         | 0         | 0         | 0         | 0         | 0         | 0         | 0         | 0         |
| K11180 | 0         | 0         | 0         | 0         | 0         | 0         | 0         | 0         | 0         | 0         | 0         | 0         | 0         | 0         | 0         | 0         |
| K13953 | 0         | 0         | 2         | 0         | 0         | 0         | 0         | 0         | 0         | 0         | 1         | 0         | 0         | 0         | 0         | 1         |
| K14333 | 0         | 0         | 0         | 0         | 0         | 0         | 0         | 0         | 0         | 0         | 1         | 0         | 0         | 0         | 0         | 0         |
| K14519 | 0         | 0         | 0         | 0         | 0         | 0         | 0         | 0         | 0         | 0         | 0         | 0         | 0         | 0         | 0         | 0         |
| K15054 | 0         | 0         | 0         | 0         | 0         | 0         | 0         | 0         | 0         | 1         | 0         | 0         | 0         | 0         | 0         | 0         |
| K16173 | 0         | 1         | 0         | 0         | 0         | 0         | 0         | 0         | 1         | 0         | 0         | 0         | 0         | 1         | 0         | 0         |
| K16514 | 0         | 0         | 0         | 0         | 0         | 0         | 0         | 0         | 1         | 0         | 1         | 0         | 0         | 0         | 0         | 0         |
| K16874 | 0         | 0         | 0         | 0         | 0         | 0         | 0         | 0         | 0         | 0         | 0         | 0         | 0         | 0         | 0         | 0         |

| EC/KO      | CH-NOM013 | CH-NOM014 | CH-NOM015 | CH-NOM016 | CH-NOM017 | CH-NOM018 | CH-NOM019 | CH-NOM020 | CH-NOM022 | CH-NOM023 | CH-NOM025 | CH-NOM026 | CH-NOM027 | CH-NOM028 | CH-NOM029 | DA-AD-1 |
|------------|-----------|-----------|-----------|-----------|-----------|-----------|-----------|-----------|-----------|-----------|-----------|-----------|-----------|-----------|-----------|---------|
| 1.1.1.-    | 22        | 41        | 38        | 39        | 25        | 47        | 33        | 43        | 29        | 33        | 33        | 46        | 32        | 55        | 30        | 39      |
| 1.1.1.1    | 18        | 24        | 19        | 29        | 26        | 42        | 26        | 28        | 25        | 18        | 24        | 47        | 25        | 44        | 38        | 23      |
| 1.1.1.157  | 0         | 0         | 0         | 2         | 1         | 2         | 0         | 0         | 0         | 0         | 0         | 1         | 0         | 1         | 0         | 1       |
| 1.1.1.205  | 13        | 20        | 15        | 17        | 13        | 22        | 13        | 18        | 14        | 13        | 13        | 20        | 17        | 22        | 16        | 18      |
| 1.1.1.35   | 1         | 1         | 1         | 0         | 0         | 3         | 0         | 3         | 1         | 1         | 1         | 3         | 2         | 4         | 2         | 0       |
| 1.12.99.6  | 1         | 1         | 0         | 0         | 1         | 0         | 0         | 0         | 1         | 1         | 2         | 1         | 1         | 3         | 2         | 1       |
| 1.13.11.-  | 0         | 0         | 0         | 0         | 0         | 0         | 0         | 1         | 0         | 0         | 0         | 0         | 0         | 0         | 0         | 0       |
| 1.13.11.1  | 0         | 0         | 0         | 0         | 0         | 0         | 0         | 0         | 0         | 0         | 0         | 0         | 0         | 0         | 0         | 0       |
| 1.13.11.2  | 0         | 0         | 0         | 0         | 0         | 0         | 0         | 0         | 0         | 0         | 0         | 0         | 0         | 0         | 0         | 0       |
| 1.13.11.3  | 0         | 0         | 0         | 0         | 0         | 0         | 0         | 0         | 0         | 0         | 0         | 0         | 0         | 0         | 0         | 0       |
| 1.13.11.39 | 0         | 0         | 0         | 0         | 0         | 0         | 0         | 0         | 0         | 0         | 0         | 0         | 0         | 0         | 0         | 0       |
| 1.13.11.5  | 0         | 0         | 0         | 0         | 0         | 0         | 0         | 0         | 0         | 0         | 0         | 0         | 0         | 0         | 0         | 0       |
| 1.13.11.8  | 0         | 0         | 0         | 0         | 0         | 0         | 0         | 1         | 0         | 0         | 0         | 1         | 0         | 0         | 0         | 0       |
| 1.14.12.10 | 0         | 0         | 0         | 0         | 0         | 0         | 0         | 1         | 0         | 0         | 1         | 1         | 0         | 1         | 1         | 0       |
| 1.14.12.13 | 0         | 0         | 0         | 0         | 0         | 0         | 0         | 0         | 0         | 0         | 0         | 0         | 0         | 0         | 0         | 0       |
| 1.14.12.18 | 0         | 0         | 0         | 0         | 0         | 0         | 0         | 0         | 0         | 0         | 0         | 0         | 0         | 0         | 0         | 0       |
| 1.14.13.-  | 0         | 0         | 0         | 0         | 0         | 0         | 0         | 0         | 0         | 0         | 2         | 6         | 2         | 3         | 2         | 0       |
| 1.14.13.1  | 0         | 0         | 0         | 0         | 0         | 0         | 0         | 0         | 0         | 0         | 0         | 0         | 0         | 0         | 0         | 0       |
| 1.14.13.2  | 0         | 0         | 0         | 0         | 0         | 0         | 0         | 1         | 0         | 0         | 0         | 1         | 0         | 0         | 0         | 0       |
| 1.14.13.50 | 0         | 0         | 0         | 0         | 0         | 0         | 0         | 0         | 0         | 0         | 0         | 0         | 0         | 0         | 0         | 0       |
| 1.14.13.7  | 0         | 0         | 0         | 0         | 0         | 0         | 0         | 0         | 0         | 0         | 0         | 0         | 0         | 1         | 0         | 0       |
| 1.14.13.8  | 0         | 0         | 0         | 0         | 0         | 0         | 0         | 0         | 0         | 0         | 0         | 0         | 0         | 0         | 0         | 0       |
| 1.14.13.82 | 0         | 0         | 0         | 0         | 0         | 0         | 0         | 1         | 0         | 0         | 0         | 0         | 0         | 0         | 0         | 0       |
| 1.14.99.-  | 0         | 0         | 0         | 0         | 0         | 0         | 0         | 0         | 0         | 0         | 0         | 1         | 0         | 0         | 0         | 0       |
| 1.17.99.1  | 0         | 0         | 0         | 0         | 0         | 0         | 0         | 0         | 0         | 0         | 0         | 0         | 0         | 0         | 0         | 0       |
| 1.18.6.1   | 0         | 0         | 0         | 0         | 0         | 0         | 0         | 0         | 1         | 0         | 0         | 0         | 0         | 0         | 0         | 0       |
| 1.2.1.-    | 0         | 0         | 0         | 0         | 0         | 0         | 0         | 2         | 0         | 0         | 2         | 2         | 0         | 2         | 1         | 0       |
| 1.2.1.10   | 1         | 6         | 0         | 1         | 3         | 8         | 3         | 3         | 2         | 3         | 4         | 4         | 3         | 5         | 5         | 0       |
| 1.2.1.3    | 3         | 4         | 1         | 3         | 3         | 6         | 5         | 6         | 2         | 3         | 3         | 12        | 9         | 11        | 7         | 4       |
| 1.2.1.39   | 0         | 0         | 0         | 0         | 0         | 0         | 0         | 0         | 0         | 0         | 0         | 1         | 0         | 0         | 0         | 0       |
| 1.2.7.1    | 8         | 6         | 6         | 7         | 8         | 9         | 7         | 4         | 5         | 5         | 3         | 3         | 2         | 5         | 0         | 10      |
| 1.2.99.2   | 2         | 0         | 0         | 1         | 2         | 4         | 3         | 3         | 0         | 1         | 2         | 9         | 3         | 5         | 5         | 2       |
| 1.3.1.-    | 0         | 0         | 0         | 0         | 0         | 0         | 0         | 1         | 2         | 0         | 0         | 0         | 0         | 0         | 0         | 0       |
| 1.3.1.2    | 0         | 0         | 0         | 0         | 0         | 0         | 0         | 0         | 0         | 0         | 1         | 1         | 0         | 2         | 1         | 0       |
| 1.3.1.25   | 0         | 0         | 0         | 0         | 0         | 0         | 0         | 0         | 0         | 0         | 0         | 0         | 0         | 0         | 0         | 0       |
| 1.3.99.-   | 0         | 0         | 0         | 0         | 0         | 0         | 0         | 0         | 0         | 0         | 0         | 0         | 0         | 0         | 0         | 0       |
| 1.6.5.-    | 30        | 25        | 35        | 36        | 25        | 41        | 36        | 30        | 26        | 29        | 21        | 27        | 12        | 32        | 23        | 49      |
| 1.7.1.-    | 7         | 5         | 4         | 9         | 8         | 9         | 7         | 6         | 6         | 8         | 6         | 12        | 4         | 5         | 7         | 12      |
| 1.8.99.3   | 0         | 0         | 0         | 0         | 0         | 0         | 0         | 1         | 0         | 0         | 0         | 2         | 0         | 0         | 0         | 0       |
| 2.1.1.-    | 126       | 134       | 129       | 163       | 128       | 235       | 155       | 145       | 128       | 108       | 141       | 204       | 142       | 174       | 154       | 186     |
| 2.3.1.-    | 86        | 88        | 91        | 113       | 59        | 130       | 114       | 106       | 92        | 105       | 90        | 117       | 65        | 120       | 101       | 99      |
| 2.3.1.16   | 3         | 1         | 1         | 2         | 2         | 2         | 2         | 0         | 2         | 1         | 0         | 1         | 2         | 2         | 0         | 1       |
| 2.3.1.5    | 0         | 0         | 0         | 0         | 0         | 0         | 0         | 0         | 0         | 0         | 1         | 1         | 0         | 1         | 1         | 0       |
| 2.3.1.9    | 0         | 1         | 0         | 1         | 0         | 0         | 0         | 3         | 1         | 1         | 3         | 3         | 0         | 1         | 2         | 0       |
| 2.4.2.10   | 11        | 8         | 8         | 11        | 12        | 16        | 9         | 11        | 5         | 5         | 6         | 13        | 8         | 10        | 9         | 13      |
| 2.4.2.3    | 5         | 12        | 2         | 4         | 4         | 7         | 4         | 3         | 6         | 2         | 1         | 9         | 6         | 3         | 5         | 7       |
| 2.4.2.4    | 3         | 0         | 1         | 2         | 3         | 4         | 4         | 5         | 0         | 0         | 3         | 4         | 4         | 2         | 2         | 0       |
| 2.4.2.8    | 7         | 10        | 4         | 9         | 6         | 10        | 7         | 7         | 6         | 7         | 6         | 11        | 8         | 14        | 8         | 12      |
| 2.5.1.-    | 14        | 12        | 17        | 17        | 7         | 19        | 11        | 15        | 16        | 12        | 17        | 12        | 5         | 14        | 10        | 23      |

| EC/KO    | CH-NOM013 | CH-NOM014 | CH-NOM015 | CH-NOM016 | CH-NOM017 | CH-NOM018 | CH-NOM019 | CH-NOM020 | CH-NOM022 | CH-NOM023 | CH-NOM025 | CH-NOM026 | CH-NOM027 | CH-NOM028 | CH-NOM029 | DA-AD-1 |
|----------|-----------|-----------|-----------|-----------|-----------|-----------|-----------|-----------|-----------|-----------|-----------|-----------|-----------|-----------|-----------|---------|
| 2.5.1.18 | 0         | 0         | 0         | 0         | 0         | 1         | 1         | 7         | 0         | 0         | 3         | 7         | 0         | 3         | 4         | 0       |
| 2.6.1.-  | 15        | 20        | 26        | 23        | 18        | 26        | 19        | 20        | 18        | 15        | 26        | 24        | 13        | 30        | 15        | 21      |
| 2.7.1.21 | 6         | 6         | 4         | 10        | 6         | 2         | 5         | 3         | 4         | 1         | 2         | 5         | 1         | 5         | 4         | 11      |
| 2.7.1.48 | 12        | 14        | 15        | 22        | 11        | 21        | 10        | 14        | 16        | 16        | 12        | 21        | 9         | 23        | 14        | 28      |
| 2.7.4.-  | 7         | 8         | 11        | 13        | 9         | 13        | 10        | 10        | 7         | 6         | 7         | 11        | 5         | 8         | 8         | 17      |
| 2.8.3.-  | 3         | 2         | 2         | 0         | 2         | 0         | 1         | 2         | 1         | 1         | 2         | 1         | 1         | 2         | 2         | 0       |
| 2.8.3.1  | 0         | 0         | 0         | 0         | 0         | 0         | 0         | 0         | 0         | 0         | 0         | 0         | 1         | 2         | 0         | 0       |
| 2.8.3.12 | 0         | 2         | 0         | 0         | 0         | 1         | 1         | 0         | 0         | 0         | 0         | 0         | 0         | 0         | 1         | 2       |
| 2.8.3.6  | 0         | 0         | 1         | 0         | 0         | 0         | 0         | 0         | 0         | 0         | 0         | 1         | 0         | 0         | 0         | 1       |
| 2.8.3.8  | 1         | 1         | 0         | 0         | 0         | 2         | 1         | 1         | 1         | 2         | 1         | 2         | 3         | 3         | 1         | 1       |
| 3.1.1.-  | 2         | 6         | 1         | 4         | 3         | 3         | 6         | 4         | 5         | 3         | 2         | 7         | 6         | 8         | 5         | 1       |
| 3.1.1.1  | 1         | 5         | 3         | 6         | 1         | 5         | 1         | 2         | 2         | 6         | 5         | 2         | 1         | 6         | 3         | 4       |
| 3.1.1.17 | 1         | 3         | 3         | 3         | 0         | 0         | 1         | 1         | 0         | 2         | 2         | 2         | 0         | 2         | 0         | 0       |
| 3.1.1.2  | 0         | 0         | 0         | 0         | 0         | 0         | 0         | 0         | 0         | 0         | 1         | 3         | 0         | 1         | 1         | 1       |
| 3.1.1.24 | 1         | 1         | 0         | 3         | 1         | 3         | 2         | 2         | 0         | 0         | 1         | 1         | 2         | 1         | 2         | 3       |
| 3.1.1.45 | 0         | 0         | 0         | 0         | 0         | 0         | 0         | 2         | 0         | 0         | 0         | 0         | 0         | 0         | 0         | 0       |
| 3.1.2.-  | 0         | 0         | 1         | 0         | 0         | 2         | 0         | 1         | 0         | 0         | 1         | 2         | 1         | 2         | 2         | 0       |
| 3.1.2.23 | 4         | 2         | 3         | 7         | 0         | 4         | 1         | 2         | 3         | 3         | 3         | 1         | 0         | 2         | 3         | 0       |
| 3.1.3.1  | 13        | 18        | 12        | 18        | 7         | 14        | 7         | 14        | 16        | 16        | 14        | 10        | 6         | 18        | 15        | 8       |
| 3.1.3.2  | 4         | 6         | 6         | 6         | 2         | 7         | 2         | 7         | 7         | 5         | 6         | 4         | 1         | 5         | 6         | 3       |
| 3.1.3.41 | 0         | 0         | 0         | 0         | 0         | 0         | 0         | 0         | 0         | 0         | 0         | 0         | 0         | 0         | 0         | 0       |
| 3.2.1.31 | 2         | 1         | 1         | 1         | 4         | 3         | 3         | 6         | 3         | 1         | 6         | 6         | 0         | 1         | 3         | 4       |
| 3.3.2.9  | 0         | 0         | 0         | 0         | 0         | 0         | 0         | 0         | 0         | 0         | 0         | 1         | 0         | 0         | 0         | 0       |
| 3.5.1.-  | 12        | 9         | 11        | 13        | 14        | 18        | 14        | 11        | 8         | 5         | 8         | 24        | 15        | 15        | 9         | 20      |
| 3.5.1.4  | 1         | 4         | 2         | 2         | 2         | 2         | 1         | 3         | 1         | 2         | 0         | 2         | 3         | 2         | 1         | 2       |
| 3.5.1.5  | 1         | 1         | 0         | 1         | 0         | 1         | 0         | 1         | 1         | 1         | 0         | 3         | 0         | 0         | 0         | 1       |
| 3.5.1.54 | 0         | 1         | 0         | 1         | 1         | 6         | 3         | 2         | 1         | 0         | 2         | 5         | 3         | 2         | 4         | 1       |
| 3.5.1.6  | 1         | 1         | 0         | 0         | 0         | 1         | 1         | 0         | 0         | 1         | 0         | 3         | 2         | 1         | 0         | 1       |
| 3.5.2.-  | 0         | 0         | 0         | 0         | 0         | 0         | 0         | 0         | 0         | 0         | 0         | 0         | 0         | 0         | 0         | 0       |
| 3.5.2.2  | 0         | 2         | 0         | 0         | 1         | 1         | 2         | 0         | 0         | 0         | 0         | 4         | 2         | 3         | 1         | 0       |
| 3.5.4.-  | 9         | 8         | 12        | 14        | 14        | 13        | 16        | 11        | 14        | 10        | 9         | 16        | 14        | 18        | 14        | 31      |
| 3.5.4.5  | 8         | 4         | 7         | 9         | 5         | 10        | 9         | 4         | 8         | 6         | 5         | 10        | 5         | 6         | 7         | 11      |
| 3.5.5.1  | 0         | 2         | 0         | 0         | 0         | 0         | 0         | 1         | 1         | 1         | 1         | 1         | 0         | 1         | 2         | 1       |
| 3.5.5.7  | 0         | 0         | 0         | 0         | 0         | 0         | 0         | 0         | 0         | 0         | 0         | 1         | 0         | 0         | 0         | 0       |
| 3.5.99.3 | 0         | 1         | 0         | 0         | 0         | 0         | 0         | 0         | 0         | 0         | 0         | 0         | 0         | 0         | 0         | 0       |
| 3.6.1.7  | 3         | 2         | 1         | 1         | 1         | 4         | 1         | 2         | 1         | 1         | 2         | 5         | 4         | 4         | 4         | 1       |
| 3.7.1.-  | 1         | 0         | 0         | 0         | 1         | 2         | 1         | 1         | 0         | 0         | 0         | 3         | 2         | 0         | 1         | 1       |
| 3.7.1.2  | 2         | 3         | 5         | 4         | 0         | 3         | 4         | 5         | 2         | 5         | 2         | 1         | 1         | 5         | 2         | 2       |
| 3.8.1.2  | 4         | 5         | 6         | 5         | 3         | 7         | 5         | 3         | 6         | 7         | 6         | 7         | 5         | 7         | 7         | 1       |
| 3.8.1.3  | 0         | 0         | 0         | 0         | 0         | 0         | 0         | 0         | 0         | 0         | 0         | 0         | 0         | 0         | 0         | 0       |
| 3.8.1.5  | 0         | 0         | 0         | 0         | 0         | 0         | 0         | 0         | 1         | 1         | 0         | 1         | 2         | 1         | 0         | 0       |
| 4.1.1.-  | 6         | 9         | 5         | 7         | 5         | 8         | 4         | 12        | 8         | 6         | 7         | 13        | 4         | 12        | 8         | 6       |
| 4.1.1.44 | 10        | 16        | 10        | 21        | 10        | 16        | 14        | 14        | 11        | 9         | 8         | 13        | 8         | 17        | 12        | 18      |
| 4.1.1.55 | 0         | 0         | 0         | 0         | 0         | 0         | 0         | 0         | 0         | 0         | 0         | 0         | 0         | 0         | 0         | 0       |
| 4.1.1.7  | 0         | 0         | 0         | 0         | 0         | 0         | 0         | 0         | 0         | 0         | 0         | 0         | 0         | 0         | 0         | 0       |
| 4.1.1.70 | 0         | 1         | 0         | 0         | 0         | 0         | 0         | 0         | 0         | 0         | 0         | 0         | 0         | 0         | 0         | 0       |
| 4.1.1.77 | 0         | 0         | 0         | 0         | 0         | 0         | 0         | 0         | 0         | 0         | 0         | 0         | 0         | 0         | 0         | 0       |
| 4.1.2.-  | 7         | 4         | 1         | 2         | 8         | 7         | 4         | 2         | 2         | 1         | 6         | 7         | 3         | 5         | 7         | 5       |
| 4.1.3.-  | 8         | 13        | 5         | 6         | 14        | 21        | 11        | 12        | 8         | 8         | 12        | 11        | 11        | 8         | 11        | 9       |

| EC/KO    | CH-NOM013 | CH-NOM014 | CH-NOM015 | CH-NOM016 | CH-NOM017 | CH-NOM018 | CH-NOM019 | CH-NOM020 | CH-NOM022 | CH-NOM023 | CH-NOM025 | CH-NOM026 | CH-NOM027 | CH-NOM028 | CH-NOM029 | DA-AD-1 |
|----------|-----------|-----------|-----------|-----------|-----------|-----------|-----------|-----------|-----------|-----------|-----------|-----------|-----------|-----------|-----------|---------|
| 4.1.3.39 | 1         | 0         | 0         | 0         | 0         | 0         | 2         | 1         | 0         | 1         | 1         | 0         | 0         | 0         | 3         | 0       |
| 4.1.99.- | 1         | 1         | 1         | 1         | 0         | 3         | 0         | 0         | 0         | 1         | 1         | 2         | 0         | 1         | 1         | 1       |
| 4.2.1.-  | 27        | 38        | 40        | 39        | 16        | 41        | 24        | 32        | 26        | 35        | 33        | 30        | 20        | 36        | 39        | 38      |
| 4.2.1.17 | 1         | 3         | 2         | 2         | 4         | 3         | 1         | 0         | 4         | 4         | 2         | 4         | 6         | 10        | 6         | 9       |
| 4.2.1.80 | 0         | 0         | 0         | 0         | 0         | 0         | 0         | 1         | 0         | 0         | 0         | 0         | 0         | 0         | 0         | 0       |
| 4.2.1.83 | 0         | 1         | 0         | 0         | 0         | 2         | 0         | 1         | 1         | 0         | 0         | 1         | 0         | 0         | 1         | 0       |
| 4.2.1.84 | 0         | 1         | 0         | 0         | 0         | 1         | 0         | 1         | 1         | 0         | 0         | 0         | 0         | 0         | 0         | 0       |
| 5.1.2.2  | 0         | 0         | 0         | 0         | 0         | 0         | 0         | 0         | 0         | 0         | 0         | 0         | 0         | 0         | 1         | 0       |
| 5.2.1.2  | 0         | 0         | 0         | 0         | 0         | 0         | 0         | 0         | 0         | 0         | 0         | 0         | 0         | 0         | 0         | 0       |
| 5.3.3.4  | 0         | 0         | 0         | 0         | 0         | 0         | 0         | 0         | 0         | 0         | 0         | 0         | 0         | 0         | 0         | 0       |
| 5.3.99.- | 1         | 1         | 3         | 2         | 3         | 1         | 2         | 2         | 2         | 0         | 1         | 2         | 3         | 7         | 3         | 1       |
| 5.4.99.- | 1         | 0         | 1         | 0         | 0         | 0         | 1         | 1         | 0         | 0         | 0         | 0         | 0         | 0         | 0         | 1       |
| 5.5.1.1  | 0         | 4         | 5         | 3         | 2         | 3         | 3         | 4         | 1         | 4         | 6         | 1         | 1         | 2         | 5         | 0       |
| 5.5.1.2  | 0         | 0         | 0         | 0         | 0         | 0         | 0         | 0         | 0         | 0         | 0         | 0         | 0         | 0         | 0         | 0       |
| 6.2.1.-  | 0         | 0         | 0         | 0         | 0         | 0         | 0         | 0         | 0         | 0         | 0         | 1         | 0         | 0         | 0         | 0       |
| 6.3.5.2  | 14        | 19        | 13        | 7         | 10        | 21        | 18        | 15        | 12        | 16        | 10        | 17        | 12        | 13        | 12        | 11      |
| K00002   | 0         | 0         | 0         | 0         | 0         | 0         | 0         | 0         | 0         | 0         | 0         | 1         | 2         | 3         | 0         | 1       |
| K00055   | 0         | 0         | 0         | 0         | 0         | 0         | 0         | 0         | 0         | 0         | 0         | 1         | 0         | 0         | 0         | 0       |
| K00074   | 2         | 1         | 3         | 4         | 1         | 7         | 5         | 8         | 1         | 2         | 3         | 5         | 3         | 6         | 2         | 2       |
| K00088   | 11        | 16        | 13        | 11        | 13        | 18        | 12        | 15        | 11        | 11        | 13        | 8         | 12        | 19        | 14        | 16      |
| K00100   | 20        | 38        | 35        | 27        | 24        | 44        | 34        | 32        | 26        | 21        | 19        | 35        | 21        | 46        | 26        | 21      |
| K00128   | 0         | 0         | 0         | 1         | 0         | 0         | 0         | 3         | 0         | 0         | 2         | 4         | 1         | 3         | 2         | 0       |
| K00129   | 0         | 0         | 0         | 0         | 0         | 0         | 0         | 0         | 0         | 0         | 0         | 0         | 0         | 0         | 0         | 0       |
| K00132   | 0         | 1         | 0         | 0         | 0         | 0         | 0         | 0         | 0         | 1         | 0         | 0         | 0         | 1         | 0         | 0       |
| K00141   | 0         | 0         | 0         | 0         | 0         | 0         | 0         | 0         | 0         | 0         | 0         | 1         | 0         | 0         | 0         | 0       |
| K00146   | 0         | 0         | 0         | 0         | 0         | 0         | 0         | 0         | 0         | 0         | 0         | 3         | 0         | 0         | 0         | 0       |
| K00148   | 0         | 0         | 0         | 0         | 0         | 0         | 0         | 0         | 0         | 0         | 0         | 0         | 0         | 0         | 0         | 0       |
| K00155   | 0         | 0         | 0         | 0         | 0         | 0         | 0         | 0         | 0         | 0         | 1         | 0         | 0         | 1         | 0         | 0       |
| K00169   | 1         | 1         | 0         | 2         | 0         | 5         | 2         | 1         | 1         | 0         | 0         | 1         | 0         | 0         | 0         | 0       |
| K00224   | 0         | 0         | 0         | 0         | 0         | 1         | 2         | 1         | 0         | 0         | 0         | 1         | 0         | 0         | 0         | 1       |
| K00274   | 0         | 0         | 0         | 0         | 0         | 0         | 0         | 0         | 0         | 0         | 0         | 0         | 0         | 0         | 0         | 0       |
| K00446   | 0         | 0         | 0         | 0         | 0         | 0         | 0         | 0         | 0         | 0         | 0         | 0         | 0         | 0         | 0         | 0       |
| K00448   | 0         | 0         | 0         | 0         | 0         | 0         | 0         | 0         | 0         | 0         | 0         | 1         | 0         | 0         | 0         | 0       |
| K00462   | 0         | 0         | 1         | 0         | 1         | 1         | 0         | 0         | 0         | 1         | 1         | 0         | 0         | 0         | 1         | 0       |
| K00480   | 0         | 0         | 0         | 0         | 0         | 0         | 0         | 0         | 0         | 0         | 0         | 0         | 0         | 0         | 0         | 0       |
| K00481   | 0         | 0         | 0         | 0         | 0         | 0         | 0         | 0         | 0         | 0         | 0         | 1         | 0         | 0         | 0         | 0       |
| K00539   | 0         | 1         | 0         | 0         | 0         | 1         | 1         | 0         | 0         | 0         | 0         | 0         | 0         | 0         | 0         | 0       |
| K00599   | 20        | 19        | 29        | 34        | 20        | 48        | 18        | 20        | 17        | 22        | 23        | 42        | 24        | 26        | 25        | 25      |
| K00626   | 4         | 3         | 3         | 4         | 4         | 4         | 4         | 2         | 3         | 3         | 3         | 3         | 4         | 4         | 4         | 1       |
| K00632   | 0         | 0         | 0         | 0         | 0         | 0         | 0         | 1         | 0         | 0         | 0         | 0         | 0         | 0         | 0         | 0       |
| K00680   | 22        | 26        | 21        | 27        | 16        | 23        | 25        | 15        | 25        | 25        | 22        | 37        | 13        | 28        | 30        | 21      |
| K00757   | 6         | 11        | 11        | 10        | 6         | 10        | 7         | 9         | 10        | 7         | 3         | 9         | 4         | 10        | 4         | 8       |
| K00758   | 1         | 0         | 2         | 1         | 1         | 1         | 1         | 2         | 0         | 0         | 1         | 1         | 1         | 1         | 2         | 0       |
| K00760   | 11        | 10        | 8         | 14        | 8         | 18        | 14        | 10        | 9         | 8         | 9         | 16        | 11        | 15        | 13        | 21      |
| K00799   | 0         | 0         | 0         | 1         | 0         | 0         | 0         | 4         | 0         | 0         | 1         | 4         | 1         | 2         | 2         | 0       |
| K00857   | 6         | 6         | 8         | 11        | 8         | 4         | 10        | 6         | 4         | 1         | 5         | 7         | 2         | 7         | 5         | 16      |
| K00876   | 13        | 13        | 19        | 19        | 17        | 21        | 16        | 22        | 14        | 15        | 14        | 16        | 11        | 18        | 14        | 22      |
| K01026   | 0         | 2         | 0         | 0         | 0         | 1         | 0         | 0         | 0         | 0         | 1         | 2         | 4         | 0         | 0         | 1       |
| K01031   | 0         | 0         | 0         | 0         | 0         | 0         | 0         | 0         | 0         | 0         | 0         | 1         | 0         | 0         | 0         | 0       |

| EC/KO  | CH-NOM013 | CH-NOM014 | CH-NOM015 | CH-NOM016 | CH-NOM017 | CH-NOM018 | CH-NOM019 | CH-NOM020 | CH-NOM022 | CH-NOM023 | CH-NOM025 | CH-NOM026 | CH-NOM027 | CH-NOM028 | CH-NOM029 | DA-AD-1 |
|--------|-----------|-----------|-----------|-----------|-----------|-----------|-----------|-----------|-----------|-----------|-----------|-----------|-----------|-----------|-----------|---------|
| K01034 | 0         | 0         | 0         | 0         | 0         | 0         | 1         | 1         | 1         | 1         | 0         | 1         | 1         | 2         | 0         | 3       |
| K01039 | 0         | 2         | 0         | 0         | 0         | 0         | 1         | 0         | 0         | 0         | 0         | 0         | 0         | 0         | 0         | 2       |
| K01041 | 4         | 6         | 6         | 8         | 3         | 7         | 4         | 8         | 6         | 4         | 4         | 4         | 1         | 7         | 4         | 3       |
| K01053 | 0         | 0         | 0         | 0         | 0         | 0         | 0         | 1         | 0         | 0         | 0         | 1         | 0         | 0         | 0         | 0       |
| K01055 | 0         | 0         | 0         | 0         | 0         | 0         | 0         | 0         | 0         | 0         | 0         | 0         | 0         | 0         | 0         | 0       |
| K01061 | 0         | 0         | 0         | 0         | 0         | 0         | 0         | 2         | 0         | 0         | 0         | 0         | 0         | 0         | 0         | 0       |
| K01066 | 1         | 4         | 4         | 3         | 0         | 3         | 2         | 3         | 0         | 4         | 5         | 2         | 2         | 5         | 6         | 2       |
| K01075 | 0         | 0         | 0         | 0         | 0         | 2         | 0         | 2         | 0         | 0         | 0         | 2         | 0         | 0         | 1         | 0       |
| K01077 | 3         | 8         | 9         | 10        | 4         | 6         | 4         | 11        | 6         | 10        | 8         | 3         | 2         | 10        | 8         | 3       |
| K01101 | 3         | 2         | 2         | 1         | 1         | 2         | 4         | 0         | 2         | 0         | 0         | 0         | 2         | 0         | 1         | 2       |
| K01195 | 2         | 3         | 7         | 5         | 3         | 8         | 5         | 4         | 2         | 4         | 6         | 5         | 2         | 4         | 6         | 3       |
| K01426 | 1         | 2         | 0         | 0         | 0         | 0         | 2         | 0         | 1         | 1         | 0         | 1         | 0         | 1         | 0         | 0       |
| K01428 | 1         | 0         | 0         | 1         | 0         | 0         | 0         | 0         | 0         | 1         | 0         | 2         | 1         | 1         | 0         | 0       |
| K01457 | 0         | 0         | 0         | 0         | 0         | 0         | 0         | 0         | 0         | 0         | 0         | 0         | 1         | 0         | 0         | 0       |
| K01464 | 0         | 2         | 0         | 0         | 1         | 1         | 6         | 0         | 0         | 0         | 1         | 4         | 5         | 6         | 2         | 0       |
| K01489 | 10        | 6         | 10        | 13        | 8         | 12        | 16        | 11        | 11        | 8         | 9         | 12        | 7         | 9         | 10        | 18      |
| K01500 | 0         | 0         | 0         | 0         | 0         | 0         | 0         | 0         | 0         | 0         | 0         | 0         | 0         | 0         | 0         | 0       |
| K01501 | 0         | 1         | 0         | 0         | 0         | 0         | 1         | 1         | 1         | 0         | 0         | 3         | 1         | 0         | 0         | 1       |
| K01502 | 0         | 0         | 0         | 0         | 0         | 0         | 0         | 0         | 0         | 0         | 0         | 1         | 0         | 0         | 0         | 0       |
| K01512 | 4         | 2         | 2         | 4         | 3         | 6         | 4         | 2         | 1         | 1         | 4         | 5         | 5         | 4         | 6         | 3       |
| K01560 | 1         | 1         | 2         | 1         | 4         | 2         | 8         | 4         | 2         | 0         | 4         | 7         | 1         | 2         | 4         | 1       |
| K01561 | 1         | 0         | 0         | 0         | 0         | 1         | 0         | 0         | 0         | 1         | 0         | 0         | 0         | 0         | 0         | 0       |
| K01563 | 0         | 0         | 0         | 0         | 0         | 0         | 0         | 0         | 0         | 0         | 0         | 0         | 0         | 0         | 0         | 0       |
| K01564 | 1         | 1         | 2         | 0         | 0         | 1         | 1         | 1         | 0         | 1         | 0         | 1         | 0         | 0         | 0         | 1       |
| K01607 | 6         | 5         | 7         | 11        | 5         | 6         | 9         | 10        | 3         | 5         | 5         | 8         | 2         | 10        | 10        | 10      |
| K01612 | 0         | 0         | 0         | 0         | 0         | 0         | 0         | 0         | 0         | 0         | 0         | 0         | 0         | 0         | 0         | 0       |
| K01615 | 11        | 14        | 16        | 14        | 15        | 17        | 12        | 14        | 9         | 9         | 11        | 10        | 6         | 9         | 9         | 4       |
| K01617 | 0         | 0         | 0         | 0         | 0         | 0         | 0         | 0         | 0         | 0         | 0         | 0         | 0         | 0         | 0         | 0       |
| K01666 | 3         | 2         | 1         | 2         | 3         | 5         | 3         | 3         | 0         | 2         | 2         | 4         | 4         | 1         | 8         | 1       |
| K01692 | 0         | 0         | 0         | 0         | 0         | 0         | 0         | 0         | 0         | 0         | 0         | 0         | 0         | 0         | 0         | 0       |
| K01721 | 0         | 0         | 0         | 0         | 0         | 0         | 0         | 0         | 0         | 0         | 0         | 0         | 0         | 0         | 0         | 0       |
| K01726 | 5         | 3         | 6         | 8         | 4         | 6         | 4         | 6         | 6         | 9         | 5         | 4         | 4         | 8         | 7         | 3       |
| K01781 | 0         | 1         | 0         | 0         | 3         | 1         | 0         | 0         | 0         | 0         | 0         | 0         | 3         | 2         | 0         | 0       |
| K01821 | 0         | 1         | 2         | 1         | 1         | 1         | 1         | 2         | 1         | 0         | 0         | 3         | 0         | 0         | 0         | 0       |
| K01856 | 0         | 0         | 0         | 0         | 0         | 0         | 0         | 0         | 0         | 0         | 0         | 0         | 0         | 0         | 0         | 0       |
| K01857 | 0         | 0         | 0         | 0         | 1         | 1         | 1         | 0         | 0         | 0         | 0         | 0         | 0         | 0         | 0         | 0       |
| K01913 | 0         | 1         | 0         | 0         | 0         | 0         | 0         | 0         | 0         | 0         | 0         | 0         | 1         | 0         | 0         | 0       |
| K01951 | 7         | 14        | 16        | 8         | 11        | 18        | 15        | 16        | 10        | 14        | 12        | 14        | 9         | 10        | 10        | 7       |
| K02554 | 0         | 0         | 0         | 0         | 0         | 0         | 0         | 1         | 0         | 0         | 0         | 0         | 0         | 0         | 0         | 0       |
| K03381 | 0         | 0         | 0         | 0         | 0         | 0         | 0         | 0         | 0         | 0         | 0         | 0         | 0         | 0         | 0         | 0       |
| K03382 | 0         | 1         | 0         | 0         | 0         | 0         | 2         | 0         | 0         | 0         | 0         | 0         | 0         | 0         | 0         | 1       |
| K03464 | 0         | 0         | 0         | 0         | 0         | 0         | 0         | 0         | 0         | 0         | 0         | 0         | 0         | 0         | 0         | 0       |
| K03518 | 4         | 6         | 3         | 3         | 10        | 8         | 8         | 3         | 4         | 5         | 3         | 10        | 13        | 19        | 7         | 13      |
| K03862 | 0         | 0         | 0         | 0         | 0         | 0         | 0         | 1         | 0         | 0         | 0         | 1         | 0         | 0         | 0         | 0       |
| K04099 | 0         | 0         | 0         | 0         | 0         | 0         | 0         | 1         | 0         | 0         | 0         | 1         | 0         | 0         | 0         | 0       |
| K04100 | 0         | 0         | 0         | 0         | 0         | 0         | 0         | 0         | 0         | 0         | 0         | 0         | 0         | 0         | 0         | 0       |
| K04102 | 0         | 0         | 0         | 0         | 0         | 0         | 0         | 0         | 0         | 0         | 0         | 0         | 0         | 0         | 0         | 0       |
| K04116 | 0         | 0         | 0         | 0         | 0         | 0         | 0         | 0         | 0         | 0         | 0         | 0         | 0         | 0         | 0         | 0       |
| K05394 | 0         | 0         | 0         | 0         | 2         | 0         | 1         | 0         | 0         | 0         | 0         | 0         | 0         | 0         | 0         | 1       |

| EC/KO  | CH-NOM013 | CH-NOM014 | CH-NOM015 | CH-NOM016 | CH-NOM017 | CH-NOM018 | CH-NOM019 | CH-NOM020 | CH-NOM022 | CH-NOM023 | CH-NOM025 | CH-NOM026 | CH-NOM027 | CH-NOM028 | CH-NOM029 | DA-AD-1 |
|--------|-----------|-----------|-----------|-----------|-----------|-----------|-----------|-----------|-----------|-----------|-----------|-----------|-----------|-----------|-----------|---------|
| K05549 | 0         | 0         | 0         | 0         | 0         | 0         | 0         | 0         | 0         | 0         | 0         | 1         | 0         | 0         | 0         | 0       |
| K05783 | 0         | 0         | 0         | 0         | 0         | 0         | 0         | 0         | 0         | 0         | 0         | 0         | 0         | 0         | 0         | 0       |
| K05797 | 0         | 0         | 0         | 0         | 0         | 0         | 0         | 0         | 0         | 0         | 0         | 0         | 0         | 0         | 0         | 0       |
| K06281 | 1         | 1         | 0         | 0         | 1         | 0         | 0         | 0         | 1         | 1         | 2         | 2         | 1         | 3         | 2         | 1       |
| K06446 | 1         | 3         | 4         | 4         | 0         | 2         | 1         | 4         | 2         | 2         | 1         | 4         | 4         | 2         | 0         | 8       |
| K06912 | 0         | 0         | 0         | 0         | 0         | 0         | 0         | 0         | 0         | 0         | 0         | 0         | 0         | 0         | 0         | 0       |
| K07535 | 0         | 0         | 0         | 0         | 0         | 0         | 0         | 0         | 0         | 0         | 0         | 0         | 0         | 0         | 0         | 0       |
| K07536 | 2         | 2         | 3         | 3         | 1         | 0         | 2         | 2         | 2         | 1         | 1         | 3         | 0         | 4         | 2         | 3       |
| K08689 | 0         | 0         | 0         | 0         | 0         | 0         | 0         | 0         | 0         | 0         | 0         | 0         | 0         | 0         | 0         | 0       |
| K08710 | 0         | 0         | 0         | 0         | 0         | 0         | 0         | 0         | 0         | 0         | 0         | 0         | 0         | 0         | 0         | 0       |
| K09461 | 0         | 0         | 0         | 0         | 0         | 0         | 0         | 0         | 0         | 0         | 0         | 1         | 1         | 1         | 0         | 0       |
| K10217 | 0         | 0         | 0         | 0         | 0         | 0         | 0         | 0         | 0         | 0         | 0         | 0         | 0         | 0         | 0         | 0       |
| K10218 | 0         | 0         | 0         | 0         | 0         | 0         | 0         | 0         | 0         | 1         | 0         | 0         | 0         | 0         | 0         | 0       |
| K10220 | 0         | 0         | 0         | 0         | 0         | 0         | 0         | 0         | 0         | 0         | 0         | 0         | 0         | 0         | 0         | 0       |
| K11180 | 0         | 0         | 0         | 0         | 0         | 0         | 0         | 0         | 0         | 0         | 0         | 0         | 0         | 0         | 0         | 1       |
| K13953 | 0         | 0         | 0         | 0         | 0         | 0         | 0         | 1         | 0         | 0         | 1         | 3         | 0         | 1         | 1         | 0       |
| K14333 | 0         | 0         | 0         | 0         | 0         | 0         | 0         | 1         | 0         | 0         | 0         | 0         | 0         | 0         | 0         | 0       |
| K14519 | 0         | 0         | 0         | 0         | 0         | 0         | 0         | 0         | 0         | 0         | 0         | 0         | 0         | 0         | 0         | 0       |
| K15054 | 0         | 0         | 0         | 0         | 0         | 1         | 0         | 0         | 0         | 0         | 0         | 2         | 0         | 0         | 1         | 0       |
| K16173 | 0         | 0         | 0         | 0         | 0         | 1         | 0         | 1         | 1         | 0         | 0         | 0         | 1         | 0         | 1         | 0       |
| K16514 | 0         | 0         | 0         | 0         | 0         | 0         | 0         | 1         | 0         | 0         | 0         | 1         | 1         | 1         | 1         | 0       |
| K16874 | 0         | 0         | 0         | 0         | 0         | 0         | 0         | 0         | 0         | 0         | 0         | 0         | 0         | 1         | 0         | 0       |

| EC/KO      | DA-AD-10 | DA-AD-11 | DA-AD-12 | DA-AD-13 | DA-AD-14 | DA-AD-15 | DA-AD-16 | DA-AD-17 | DA-AD-18 | DA-AD-19 | DA-AD-2 | DA-AD-20 | DA-AD-21 | DA-AD-22 | DA-AD-23 | DA-AD-24 | DA-AD-25 | DA-AD-26 | DA-AD-27 |
|------------|----------|----------|----------|----------|----------|----------|----------|----------|----------|----------|---------|----------|----------|----------|----------|----------|----------|----------|----------|
| 1.1.1.-    | 12       | 29       | 51       | 17       | 71       | 63       | 21       | 71       | 21       | 9        | 34      | 23       | 73       | 28       | 17       | 10       | 31       | 78       | 35       |
| 1.1.1.1    | 8        | 20       | 31       | 7        | 48       | 47       | 13       | 42       | 7        | 4        | 18      | 12       | 40       | 30       | 7        | 12       | 11       | 46       | 35       |
| 1.1.1.157  | 0        | 0        | 1        | 0        | 2        | 0        | 0        | 1        | 0        | 0        | 1       | 0        | 1        | 0        | 0        | 1        | 0        | 0        | 0        |
| 1.1.1.205  | 6        | 4        | 30       | 6        | 35       | 27       | 9        | 34       | 10       | 4        | 9       | 7        | 24       | 8        | 4        | 6        | 11       | 26       | 12       |
| 1.1.1.35   | 1        | 3        | 2        | 2        | 3        | 3        | 0        | 2        | 1        | 0        | 2       | 0        | 2        | 2        | 0        | 0        | 1        | 3        | 1        |
| 1.12.99.6  | 0        | 0        | 1        | 0        | 5        | 3        | 0        | 6        | 0        | 0        | 1       | 0        | 3        | 0        | 1        | 0        | 2        | 7        | 1        |
| 1.13.11.-  | 0        | 0        | 0        | 0        | 0        | 0        | 0        | 0        | 0        | 0        | 0       | 0        | 0        | 0        | 0        | 0        | 0        | 0        | 0        |
| 1.13.11.1  | 0        | 0        | 0        | 0        | 0        | 0        | 0        | 0        | 0        | 0        | 0       | 0        | 0        | 0        | 0        | 0        | 0        | 0        | 0        |
| 1.13.11.2  | 0        | 0        | 0        | 0        | 0        | 0        | 0        | 0        | 0        | 0        | 0       | 0        | 0        | 0        | 0        | 0        | 0        | 0        | 0        |
| 1.13.11.3  | 0        | 1        | 0        | 0        | 0        | 0        | 0        | 0        | 0        | 0        | 0       | 0        | 0        | 0        | 0        | 0        | 0        | 0        | 0        |
| 1.13.11.39 | 0        | 0        | 0        | 0        | 0        | 0        | 0        | 0        | 0        | 0        | 0       | 0        | 0        | 0        | 0        | 0        | 0        | 0        | 0        |
| 1.13.11.5  | 0        | 1        | 0        | 0        | 0        | 0        | 0        | 0        | 0        | 0        | 0       | 0        | 0        | 0        | 0        | 0        | 0        | 0        | 0        |
| 1.13.11.8  | 0        | 1        | 0        | 0        | 0        | 0        | 0        | 0        | 0        | 0        | 0       | 0        | 0        | 0        | 0        | 0        | 0        | 0        | 0        |
| 1.14.12.10 | 0        | 0        | 0        | 0        | 0        | 0        | 0        | 1        | 0        | 0        | 0       | 0        | 0        | 0        | 1        | 0        | 0        | 1        | 0        |
| 1.14.12.13 | 0        | 0        | 0        | 0        | 0        | 0        | 0        | 0        | 0        | 0        | 0       | 0        | 0        | 0        | 0        | 0        | 0        | 0        | 0        |
| 1.14.12.18 | 0        | 0        | 0        | 0        | 0        | 0        | 0        | 0        | 0        | 0        | 0       | 0        | 0        | 0        | 0        | 0        | 0        | 0        | 0        |
| 1.14.13.-  | 0        | 6        | 0        | 0        | 0        | 1        | 0        | 0        | 0        | 0        | 1       | 0        | 1        | 0        | 0        | 0        | 0        | 1        | 1        |
| 1.14.13.1  | 0        | 0        | 0        | 0        | 0        | 0        | 0        | 0        | 0        | 0        | 0       | 0        | 0        | 0        | 0        | 0        | 0        | 0        | 0        |
| 1.14.13.2  | 0        | 1        | 0        | 0        | 0        | 0        | 0        | 0        | 0        | 0        | 0       | 0        | 0        | 0        | 0        | 0        | 0        | 0        | 0        |
| 1.14.13.50 | 0        | 0        | 0        | 0        | 0        | 0        | 0        | 0        | 0        | 0        | 0       | 0        | 0        | 0        | 0        | 0        | 0        | 0        | 0        |
| 1.14.13.7  | 0        | 0        | 1        | 0        | 0        | 0        | 0        | 0        | 0        | 0        | 0       | 0        | 1        | 0        | 0        | 0        | 0        | 0        | 0        |
| 1.14.13.8  | 0        | 0        | 0        | 0        | 0        | 0        | 0        | 0        | 0        | 0        | 0       | 0        | 0        | 0        | 0        | 0        | 0        | 0        | 0        |
| 1.14.13.82 | 0        | 2        | 0        | 0        | 0        | 0        | 0        | 0        | 0        | 0        | 0       | 0        | 0        | 0        | 0        | 0        | 0        | 2        | 0        |
| 1.14.99.-  | 0        | 0        | 0        | 0        | 0        | 0        | 0        | 0        | 0        | 0        | 0       | 0        | 0        | 0        | 0        | 0        | 0        | 0        | 0        |
| 1.17.99.1  | 0        | 0        | 0        | 0        | 0        | 0        | 0        | 0        | 0        | 0        | 0       | 0        | 0        | 0        | 0        | 0        | 0        | 0        | 0        |
| 1.18.6.1   | 0        | 0        | 0        | 0        | 0        | 0        | 0        | 0        | 0        | 0        | 0       | 0        | 0        | 0        | 0        | 1        | 0        | 0        | 0        |
| 1.2.1.-    | 0        | 2        | 0        | 0        | 0        | 0        | 0        | 0        | 0        | 0        | 0       | 0        | 0        | 0        | 0        | 0        | 0        | 1        | 0        |
| 1.2.1.10   | 1        | 1        | 6        | 2        | 4        | 3        | 1        | 7        | 1        | 1        | 1       | 0        | 5        | 3        | 2        | 1        | 5        | 3        | 4        |
| 1.2.1.3    | 1        | 8        | 12       | 1        | 10       | 11       | 3        | 12       | 5        | 1        | 5       | 1        | 10       | 5        | 3        | 2        | 7        | 11       | 5        |
| 1.2.1.39   | 0        | 0        | 0        | 0        | 0        | 0        | 0        | 0        | 0        | 0        | 0       | 0        | 0        | 0        | 0        | 0        | 0        | 0        | 0        |
| 1.2.7.1    | 4        | 3        | 15       | 2        | 17       | 17       | 6        | 16       | 4        | 2        | 20      | 5        | 9        | 5        | 2        | 1        | 4        | 16       | 7        |
| 1.2.99.2   | 1        | 1        | 1        | 0        | 4        | 8        | 0        | 2        | 1        | 1        | 2       | 1        | 4        | 1        | 0        | 0        | 2        | 3        | 2        |
| 1.3.1.-    | 0        | 0        | 0        | 0        | 0        | 0        | 0        | 1        | 0        | 0        | 0       | 0        | 0        | 0        | 0        | 0        | 0        | 0        | 0        |
| 1.3.1.2    | 0        | 0        | 1        | 0        | 1        | 1        | 0        | 2        | 0        | 0        | 0       | 0        | 2        | 0        | 0        | 0        | 3        | 2        | 1        |
| 1.3.1.25   | 0        | 1        | 0        | 0        | 0        | 0        | 0        | 0        | 0        | 0        | 0       | 0        | 0        | 0        | 0        | 0        | 0        | 0        | 0        |
| 1.3.99.-   | 0        | 0        | 0        | 0        | 0        | 2        | 0        | 0        | 0        | 0        | 0       | 0        | 0        | 0        | 1        | 0        | 0        | 1        | 0        |
| 1.6.5.-    | 14       | 18       | 55       | 11       | 73       | 59       | 22       | 56       | 23       | 8        | 41      | 27       | 54       | 28       | 17       | 12       | 26       | 58       | 40       |
| 1.7.1.-    | 3        | 5        | 12       | 2        | 8        | 11       | 4        | 10       | 2        | 2        | 5       | 5        | 11       | 5        | 3        | 2        | 6        | 10       | 8        |
| 1.8.99.3   | 0        | 0        | 0        | 0        | 1        | 0        | 0        | 0        | 0        | 0        | 0       | 0        | 1        | 0        | 0        | 0        | 0        | 1        | 0        |
| 2.1.1.-    | 103      | 101      | 336      | 83       | 432      | 392      | 106      | 345      | 89       | 40       | 180     | 128      | 275      | 171      | 97       | 101      | 152      | 329      | 201      |
| 2.3.1.-    | 50       | 72       | 169      | 62       | 231      | 228      | 59       | 190      | 58       | 24       | 115     | 80       | 147      | 118      | 41       | 48       | 86       | 214      | 122      |
| 2.3.1.16   | 1        | 0        | 2        | 0        | 3        | 0        | 0        | 1        | 0        | 0        | 0       | 0        | 2        | 0        | 0        | 0        | 0        | 1        | 2        |
| 2.3.1.5    | 0        | 0        | 0        | 0        | 0        | 0        | 0        | 0        | 0        | 0        | 0       | 0        | 0        | 0        | 0        | 0        | 0        | 1        | 0        |
| 2.3.1.9    | 0        | 2        | 1        | 1        | 1        | 2        | 0        | 1        | 0        | 0        | 1       | 0        | 0        | 0        | 0        | 0        | 0        | 3        | 1        |
| 2.4.2.10   | 6        | 3        | 23       | 4        | 18       | 21       | 5        | 19       | 5        | 4        | 11      | 5        | 17       | 6        | 5        | 7        | 10       | 20       | 12       |
| 2.4.2.3    | 8        | 5        | 10       | 1        | 14       | 14       | 3        | 12       | 3        | 0        | 3       | 4        | 9        | 5        | 0        | 2        | 5        | 9        | 4        |
| 2.4.2.4    | 1        | 1        | 7        | 0        | 6        | 7        | 0        | 7        | 2        | 0        | 2       | 3        | 1        | 2        | 3        | 0        | 3        | 6        | 4        |
| 2.4.2.8    | 3        | 4        | 17       | 2        | 21       | 20       | 3        | 15       | 4        | 1        | 6       | 2        | 15       | 10       | 6        | 2        | 5        | 17       | 13       |
| 2.5.1.-    | 7        | 13       | 27       | 9        | 37       | 29       | 7        | 27       | 10       | 2        | 16      | 13       | 25       | 14       | 7        | 4        | 6        | 28       | 21       |

| EC/KO    | DA-AD-10 | DA-AD-11 | DA-AD-12 | DA-AD-13 | DA-AD-14 | DA-AD-15 | DA-AD-16 | DA-AD-17 | DA-AD-18 | DA-AD-19 | DA-AD-2 | DA-AD-20 | DA-AD-21 | DA-AD-22 | DA-AD-23 | DA-AD-24 | DA-AD-25 | DA-AD-26 | DA-AD-27 |
|----------|----------|----------|----------|----------|----------|----------|----------|----------|----------|----------|---------|----------|----------|----------|----------|----------|----------|----------|----------|
| 2.5.1.18 | 0        | 8        | 1        | 0        | 0        | 5        | 0        | 2        | 0        | 0        | 0       | 0        | 3        | 0        | 0        | 0        | 1        | 7        | 0        |
| 2.6.1.-  | 13       | 16       | 42       | 14       | 44       | 43       | 12       | 57       | 11       | 7        | 16      | 13       | 27       | 24       | 11       | 15       | 22       | 34       | 29       |
| 2.7.1.21 | 4        | 2        | 8        | 4        | 11       | 13       | 2        | 9        | 2        | 3        | 5       | 2        | 5        | 5        | 2        | 2        | 6        | 9        | 2        |
| 2.7.1.48 | 14       | 11       | 45       | 10       | 36       | 39       | 9        | 47       | 15       | 2        | 28      | 17       | 31       | 19       | 13       | 11       | 16       | 29       | 22       |
| 2.7.4.-  | 6        | 4        | 24       | 7        | 30       | 19       | 5        | 20       | 5        | 0        | 11      | 10       | 16       | 10       | 8        | 6        | 17       | 21       | 12       |
| 2.8.3.-  | 0        | 0        | 1        | 0        | 3        | 4        | 0        | 2        | 0        | 1        | 0       | 1        | 3        | 2        | 0        | 0        | 0        | 4        | 1        |
| 2.8.3.1  | 0        | 0        | 0        | 0        | 1        | 0        | 0        | 0        | 0        | 0        | 2       | 0        | 0        | 1        | 0        | 0        | 0        | 0        | 0        |
| 2.8.3.12 | 2        | 0        | 0        | 0        | 0        | 0        | 1        | 0        | 0        | 0        | 3       | 1        | 0        | 0        | 0        | 0        | 0        | 1        | 0        |
| 2.8.3.6  | 0        | 3        | 1        | 0        | 0        | 0        | 0        | 0        | 0        | 0        | 2       | 0        | 1        | 0        | 0        | 0        | 0        | 0        | 0        |
| 2.8.3.8  | 1        | 1        | 1        | 0        | 3        | 2        | 0        | 0        | 0        | 0        | 1       | 0        | 2        | 0        | 1        | 0        | 1        | 3        | 0        |
| 3.1.1.-  | 1        | 7        | 6        | 1        | 6        | 7        | 1        | 7        | 2        | 1        | 5       | 2        | 8        | 4        | 2        | 3        | 1        | 14       | 5        |
| 3.1.1.1  | 1        | 3        | 9        | 3        | 9        | 11       | 3        | 7        | 1        | 0        | 5       | 3        | 11       | 4        | 3        | 2        | 3        | 12       | 4        |
| 3.1.1.17 | 1        | 2        | 0        | 0        | 1        | 2        | 0        | 3        | 0        | 0        | 1       | 1        | 3        | 1        | 0        | 0        | 1        | 3        | 1        |
| 3.1.1.2  | 0        | 1        | 0        | 0        | 0        | 1        | 0        | 0        | 0        | 0        | 1       | 0        | 0        | 0        | 0        | 0        | 0        | 0        | 1        |
| 3.1.1.24 | 0        | 0        | 5        | 2        | 2        | 5        | 1        | 2        | 2        | 0        | 3       | 0        | 2        | 1        | 1        | 0        | 2        | 4        | 2        |
| 3.1.1.45 | 0        | 0        | 0        | 0        | 0        | 0        | 0        | 0        | 0        | 0        | 0       | 0        | 0        | 0        | 0        | 0        | 0        | 0        | 0        |
| 3.1.2.-  | 0        | 1        | 1        | 0        | 0        | 1        | 0        | 0        | 0        | 0        | 1       | 0        | 1        | 0        | 0        | 0        | 0        | 2        | 0        |
| 3.1.2.23 | 1        | 3        | 6        | 4        | 5        | 7        | 2        | 7        | 4        | 1        | 4       | 5        | 5        | 5        | 0        | 1        | 5        | 4        | 3        |
| 3.1.3.1  | 5        | 5        | 17       | 8        | 24       | 22       | 9        | 18       | 2        | 3        | 8       | 10       | 24       | 12       | 3        | 7        | 9        | 24       | 12       |
| 3.1.3.2  | 2        | 4        | 6        | 3        | 7        | 7        | 1        | 3        | 2        | 2        | 2       | 4        | 4        | 2        | 1        | 1        | 2        | 6        | 3        |
| 3.1.3.41 | 0        | 0        | 0        | 0        | 0        | 0        | 0        | 0        | 0        | 0        | 1       | 0        | 0        | 0        | 0        | 0        | 0        | 0        | 0        |
| 3.2.1.31 | 6        | 0        | 3        | 2        | 4        | 7        | 3        | 8        | 2        | 0        | 0       | 2        | 3        | 2        | 0        | 1        | 4        | 3        | 5        |
| 3.3.2.9  | 0        | 1        | 0        | 0        | 0        | 0        | 0        | 0        | 0        | 0        | 0       | 0        | 0        | 0        | 0        | 0        | 0        | 0        | 0        |
| 3.5.1.-  | 9        | 11       | 39       | 12       | 43       | 32       | 9        | 34       | 10       | 3        | 15      | 17       | 22       | 19       | 12       | 14       | 16       | 32       | 16       |
| 3.5.1.4  | 0        | 1        | 3        | 1        | 7        | 5        | 0        | 2        | 0        | 2        | 1       | 1        | 4        | 2        | 2        | 0        | 0        | 0        | 1        |
| 3.5.1.5  | 0        | 1        | 1        | 0        | 1        | 1        | 0        | 2        | 0        | 0        | 0       | 0        | 2        | 1        | 0        | 0        | 0        | 2        | 1        |
| 3.5.1.54 | 1        | 1        | 3        | 1        | 3        | 2        | 4        | 6        | 0        | 0        | 6       | 1        | 4        | 0        | 1        | 0        | 1        | 5        | 3        |
| 3.5.1.6  | 1        | 3        | 3        | 0        | 3        | 2        | 0        | 2        | 0        | 1        | 0       | 1        | 4        | 0        | 1        | 1        | 1        | 4        | 2        |
| 3.5.2.-  | 0        | 0        | 0        | 0        | 0        | 0        | 0        | 0        | 0        | 0        | 0       | 0        | 1        | 0        | 0        | 0        | 0        | 0        | 0        |
| 3.5.2.2  | 1        | 0        | 0        | 0        | 0        | 2        | 2        | 1        | 0        | 0        | 1       | 1        | 2        | 0        | 0        | 0        | 1        | 1        | 3        |
| 3.5.4.-  | 6        | 13       | 42       | 7        | 41       | 35       | 13       | 40       | 10       | 4        | 16      | 12       | 26       | 17       | 6        | 8        | 16       | 31       | 18       |
| 3.5.4.5  | 7        | 4        | 24       | 6        | 22       | 26       | 4        | 18       | 6        | 4        | 11      | 5        | 13       | 17       | 6        | 3        | 7        | 16       | 11       |
| 3.5.5.1  | 1        | 0        | 0        | 0        | 0        | 2        | 0        | 2        | 0        | 0        | 2       | 0        | 2        | 1        | 0        | 2        | 0        | 4        | 0        |
| 3.5.5.7  | 0        | 0        | 1        | 0        | 0        | 0        | 0        | 0        | 0        | 0        | 0       | 0        | 0        | 0        | 0        | 0        | 0        | 0        | 0        |
| 3.5.99.3 | 0        | 0        | 0        | 0        | 1        | 0        | 0        | 0        | 0        | 0        | 0       | 0        | 0        | 0        | 0        | 0        | 0        | 0        | 0        |
| 3.6.1.7  | 3        | 2        | 6        | 2        | 5        | 6        | 2        | 6        | 2        | 0        | 3       | 2        | 4        | 4        | 0        | 0        | 2        | 1        | 1        |
| 3.7.1.-  | 0        | 1        | 4        | 0        | 1        | 0        | 1        | 1        | 0        | 0        | 0       | 0        | 2        | 0        | 1        | 0        | 1        | 2        | 1        |
| 3.7.1.2  | 0        | 4        | 4        | 1        | 7        | 8        | 3        | 7        | 1        | 1        | 3       | 2        | 8        | 5        | 0        | 0        | 4        | 2        | 3        |
| 3.8.1.2  | 2        | 4        | 4        | 3        | 6        | 6        | 2        | 9        | 1        | 1        | 1       | 3        | 9        | 5        | 1        | 0        | 5        | 7        | 4        |
| 3.8.1.3  | 0        | 0        | 0        | 0        | 0        | 0        | 0        | 0        | 0        | 0        | 0       | 0        | 0        | 0        | 0        | 0        | 0        | 0        | 0        |
| 3.8.1.5  | 0        | 2        | 3        | 0        | 0        | 1        | 0        | 1        | 0        | 0        | 0       | 0        | 0        | 0        | 0        | 0        | 0        | 0        | 1        |
| 4.1.1.-  | 2        | 8        | 8        | 3        | 16       | 13       | 3        | 17       | 5        | 2        | 6       | 8        | 15       | 8        | 5        | 2        | 4        | 10       | 11       |
| 4.1.1.44 | 9        | 7        | 29       | 11       | 43       | 27       | 15       | 32       | 8        | 4        | 37      | 14       | 32       | 23       | 9        | 7        | 20       | 31       | 20       |
| 4.1.1.55 | 0        | 0        | 0        | 0        | 0        | 0        | 0        | 0        | 0        | 0        | 0       | 0        | 0        | 0        | 0        | 0        | 0        | 1        | 0        |
| 4.1.1.7  | 0        | 0        | 0        | 0        | 0        | 0        | 0        | 0        | 0        | 0        | 0       | 0        | 0        | 0        | 0        | 0        | 0        | 0        | 0        |
| 4.1.1.70 | 0        | 0        | 0        | 0        | 0        | 0        | 0        | 0        | 0        | 0        | 0       | 0        | 1        | 0        | 0        | 0        | 0        | 0        | 1        |
| 4.1.1.77 | 0        | 0        | 0        | 0        | 0        | 0        | 0        | 0        | 0        | 0        | 0       | 0        | 0        | 0        | 0        | 0        | 0        | 0        | 0        |
| 4.1.2.-  | 2        | 3        | 4        | 2        | 6        | 9        | 1        | 4        | 0        | 0        | 2       | 1        | 3        | 7        | 0        | 2        | 5        | 5        | 4        |
| 4.1.3.-  | 11       | 6        | 21       | 11       | 24       | 35       | 10       | 31       | 7        | 3        | 12      | 10       | 27       | 12       | 4        | 11       | 11       | 18       | 21       |



| EC/KO    | DA-AD-10 | DA-AD-11 | DA-AD-12 | DA-AD-13 | DA-AD-14 | DA-AD-15 | DA-AD-16 | DA-AD-17 | DA-AD-18 | DA-AD-19 | DA-AD-2 | DA-AD-20 | DA-AD-21 | DA-AD-22 | DA-AD-23 | DA-AD-24 | DA-AD-25 | DA-AD-26 | DA-AD-27 |
|----------|----------|----------|----------|----------|----------|----------|----------|----------|----------|----------|---------|----------|----------|----------|----------|----------|----------|----------|----------|
| 4.1.3.39 | 0        | 1        | 0        | 0        | 1        | 0        | 0        | 0        | 0        | 0        | 0       | 0        | 0        | 0        | 0        | 0        | 0        | 1        | 0        |
| 4.1.99.- | 2        | 1        | 4        | 2        | 5        | 3        | 1        | 2        | 1        | 0        | 1       | 1        | 1        | 2        | 1        | 3        | 0        | 4        | 0        |
| 4.2.1.-  | 18       | 23       | 58       | 16       | 75       | 60       | 25       | 70       | 13       | 10       | 34      | 26       | 57       | 46       | 16       | 18       | 37       | 75       | 35       |
| 4.2.1.17 | 3        | 1        | 4        | 2        | 7        | 5        | 1        | 9        | 1        | 0        | 4       | 4        | 8        | 2        | 0        | 5        | 5        | 10       | 1        |
| 4.2.1.80 | 0        | 0        | 0        | 0        | 0        | 0        | 0        | 1        | 0        | 0        | 0       | 0        | 0        | 0        | 0        | 0        | 0        | 0        | 0        |
| 4.2.1.83 | 3        | 1        | 1        | 1        | 2        | 0        | 0        | 1        | 0        | 0        | 0       | 0        | 0        | 2        | 0        | 1        | 0        | 1        | 1        |
| 4.2.1.84 | 0        | 0        | 0        | 0        | 0        | 0        | 0        | 0        | 0        | 0        | 0       | 0        | 0        | 0        | 0        | 0        | 0        | 0        | 1        |
| 5.1.2.2  | 0        | 0        | 0        | 0        | 0        | 0        | 0        | 0        | 0        | 0        | 0       | 0        | 0        | 0        | 0        | 0        | 0        | 0        | 0        |
| 5.2.1.2  | 0        | 0        | 0        | 0        | 0        | 0        | 0        | 0        | 0        | 0        | 0       | 0        | 0        | 0        | 0        | 0        | 0        | 0        | 0        |
| 5.3.3.4  | 0        | 1        | 0        | 0        | 0        | 0        | 0        | 0        | 0        | 0        | 1       | 0        | 0        | 0        | 0        | 0        | 0        | 0        | 0        |
| 5.3.99.- | 2        | 2        | 6        | 0        | 6        | 4        | 1        | 4        | 0        | 0        | 4       | 2        | 2        | 3        | 0        | 1        | 4        | 3        | 1        |
| 5.4.99.- | 0        | 0        | 1        | 0        | 2        | 2        | 0        | 1        | 1        | 0        | 0       | 1        | 0        | 0        | 0        | 0        | 1        | 0        | 0        |
| 5.5.1.1  | 1        | 0        | 3        | 3        | 5        | 4        | 0        | 7        | 2        | 0        | 0       | 3        | 5        | 3        | 1        | 0        | 1        | 4        | 3        |
| 5.5.1.2  | 0        | 0        | 0        | 0        | 0        | 0        | 0        | 0        | 0        | 0        | 0       | 0        | 0        | 0        | 0        | 0        | 0        | 0        | 1        |
| 6.2.1.-  | 0        | 1        | 0        | 0        | 0        | 0        | 0        | 0        | 0        | 0        | 0       | 0        | 0        | 0        | 0        | 0        | 0        | 0        | 0        |
| 6.3.5.2  | 5        | 6        | 17       | 5        | 23       | 26       | 0        | 28       | 3        | 3        | 11      | 9        | 23       | 13       | 5        | 3        | 12       | 28       | 17       |
| K00002   | 0        | 0        | 1        | 1        | 3        | 3        | 0        | 1        | 0        | 0        | 0       | 2        | 3        | 2        | 0        | 1        | 1        | 3        | 1        |
| K00055   | 0        | 2        | 0        | 0        | 0        | 0        | 0        | 0        | 0        | 0        | 0       | 0        | 0        | 0        | 0        | 0        | 0        | 0        | 0        |
| K00074   | 1        | 2        | 6        | 2        | 5        | 3        | 1        | 5        | 1        | 0        | 7       | 0        | 3        | 2        | 0        | 0        | 1        | 1        | 3        |
| K00088   | 2        | 4        | 25       | 0        | 23       | 21       | 7        | 22       | 3        | 1        | 10      | 9        | 18       | 1        | 6        | 6        | 7        | 16       | 17       |
| K00100   | 16       | 16       | 56       | 12       | 83       | 77       | 20       | 64       | 14       | 10       | 39      | 19       | 57       | 32       | 19       | 10       | 34       | 72       | 34       |
| K00128   | 0        | 2        | 1        | 0        | 1        | 5        | 0        | 4        | 1        | 0        | 1       | 0        | 1        | 4        | 0        | 0        | 2        | 3        | 0        |
| K00129   | 0        | 1        | 0        | 0        | 0        | 0        | 0        | 0        | 0        | 0        | 0       | 0        | 0        | 0        | 0        | 0        | 0        | 0        | 0        |
| K00132   | 0        | 0        | 2        | 0        | 0        | 1        | 0        | 1        | 0        | 0        | 1       | 0        | 0        | 0        | 2        | 0        | 0        | 0        | 1        |
| K00141   | 0        | 1        | 0        | 0        | 0        | 0        | 0        | 0        | 0        | 0        | 0       | 0        | 0        | 0        | 0        | 0        | 0        | 0        | 0        |
| K00146   | 0        | 1        | 0        | 0        | 0        | 0        | 0        | 0        | 0        | 0        | 0       | 0        | 0        | 0        | 0        | 0        | 0        | 0        | 0        |
| K00148   | 0        | 0        | 0        | 0        | 0        | 0        | 0        | 0        | 0        | 0        | 0       | 0        | 0        | 0        | 0        | 0        | 0        | 0        | 0        |
| K00155   | 0        | 0        | 0        | 0        | 0        | 1        | 0        | 1        | 0        | 1        | 0       | 0        | 0        | 0        | 0        | 0        | 0        | 1        | 0        |
| K00169   | 0        | 1        | 3        | 1        | 4        | 2        | 1        | 2        | 0        | 0        | 0       | 1        | 2        | 1        | 0        | 0        | 0        | 3        | 1        |
| K00224   | 0        | 0        | 1        | 0        | 1        | 0        | 0        | 1        | 0        | 0        | 1       | 0        | 1        | 0        | 0        | 0        | 0        | 2        | 1        |
| K00274   | 0        | 0        | 0        | 0        | 0        | 0        | 0        | 0        | 0        | 0        | 0       | 0        | 0        | 0        | 0        | 0        | 0        | 0        | 0        |
| K00446   | 0        | 0        | 0        | 0        | 0        | 0        | 0        | 0        | 0        | 0        | 0       | 0        | 0        | 0        | 0        | 0        | 0        | 0        | 0        |
| K00448   | 0        | 0        | 0        | 0        | 0        | 0        | 0        | 0        | 0        | 0        | 0       | 0        | 0        | 0        | 0        | 0        | 0        | 0        | 0        |
| K00462   | 0        | 0        | 1        | 0        | 0        | 0        | 0        | 1        | 0        | 1        | 0       | 1        | 2        | 1        | 0        | 0        | 0        | 1        | 0        |
| K00480   | 0        | 0        | 0        | 0        | 0        | 0        | 0        | 0        | 0        | 0        | 0       | 0        | 0        | 0        | 0        | 0        | 0        | 0        | 0        |
| K00481   | 0        | 1        | 0        | 0        | 0        | 0        | 0        | 0        | 0        | 0        | 0       | 0        | 0        | 0        | 0        | 0        | 0        | 0        | 0        |
| K00539   | 0        | 0        | 1        | 0        | 1        | 1        | 1        | 1        | 0        | 0        | 0       | 1        | 1        | 1        | 0        | 0        | 0        | 1        | 0        |
| K00599   | 20       | 17       | 54       | 26       | 65       | 67       | 25       | 63       | 24       | 5        | 20      | 27       | 48       | 31       | 16       | 18       | 22       | 48       | 34       |
| K00626   | 1        | 2        | 3        | 1        | 6        | 3        | 0        | 3        | 0        | 0        | 1       | 1        | 4        | 0        | 0        | 0        | 0        | 5        | 4        |
| K00632   | 0        | 0        | 0        | 0        | 0        | 1        | 0        | 0        | 0        | 0        | 0       | 0        | 0        | 0        | 0        | 0        | 0        | 0        | 0        |
| K00680   | 12       | 13       | 49       | 17       | 69       | 59       | 22       | 51       | 9        | 5        | 38      | 17       | 43       | 27       | 14       | 11       | 24       | 45       | 31       |
| K00757   | 5        | 6        | 9        | 3        | 15       | 13       | 6        | 17       | 6        | 1        | 6       | 9        | 15       | 7        | 5        | 5        | 5        | 16       | 5        |
| K00758   | 2        | 0        | 5        | 3        | 5        | 5        | 2        | 4        | 2        | 0        | 2       | 2        | 1        | 3        | 0        | 1        | 2        | 4        | 1        |
| K00760   | 7        | 9        | 31       | 5        | 33       | 31       | 9        | 27       | 8        | 2        | 15      | 8        | 23       | 17       | 8        | 6        | 9        | 29       | 17       |
| K00799   | 0        | 2        | 0        | 0        | 1        | 2        | 0        | 0        | 1        | 0        | 0       | 1        | 0        | 1        | 0        | 0        | 0        | 3        | 0        |
| K00857   | 4        | 5        | 11       | 7        | 16       | 17       | 6        | 15       | 5        | 3        | 12      | 5        | 9        | 7        | 7        | 2        | 10       | 12       | 6        |
| K00876   | 7        | 12       | 45       | 11       | 31       | 36       | 9        | 35       | 12       | 4        | 19      | 17       | 33       | 16       | 16       | 7        | 11       | 27       | 18       |
| K01026   | 1        | 0        | 0        | 0        | 2        | 1        | 0        | 0        | 0        | 0        | 1       | 0        | 1        | 0        | 0        | 0        | 0        | 0        | 0        |
| K01031   | 0        | 0        | 0        | 0        | 0        | 0        | 0        | 0        | 0        | 0        | 0       | 0        | 0        | 0        | 0        | 0        | 0        | 0        | 0        |

| EC/KO  | DA-AD-10 | DA-AD-11 | DA-AD-12 | DA-AD-13 | DA-AD-14 | DA-AD-15 | DA-AD-16 | DA-AD-17 | DA-AD-18 | DA-AD-19 | DA-AD-2 | DA-AD-20 | DA-AD-21 | DA-AD-22 | DA-AD-23 | DA-AD-24 | DA-AD-25 | DA-AD-26 | DA-AD-27 |
|--------|----------|----------|----------|----------|----------|----------|----------|----------|----------|----------|---------|----------|----------|----------|----------|----------|----------|----------|----------|
| K01034 | 0        | 0        | 3        | 1        | 4        | 0        | 1        | 4        | 0        | 0        | 2       | 1        | 0        | 0        | 0        | 0        | 1        | 3        | 1        |
| K01039 | 0        | 0        | 0        | 0        | 0        | 1        | 0        | 1        | 0        | 0        | 1       | 0        | 0        | 0        | 0        | 0        | 0        | 0        | 0        |
| K01041 | 0        | 2        | 5        | 1        | 5        | 7        | 2        | 6        | 1        | 0        | 1       | 2        | 7        | 1        | 0        | 1        | 3        | 7        | 6        |
| K01053 | 0        | 1        | 0        | 0        | 0        | 0        | 0        | 0        | 0        | 0        | 0       | 0        | 0        | 0        | 0        | 0        | 0        | 0        | 0        |
| K01055 | 0        | 0        | 0        | 0        | 0        | 0        | 0        | 0        | 0        | 0        | 0       | 0        | 0        | 0        | 0        | 0        | 0        | 0        | 0        |
| K01061 | 0        | 0        | 0        | 0        | 0        | 0        | 0        | 0        | 0        | 0        | 0       | 0        | 0        | 0        | 0        | 0        | 0        | 0        | 0        |
| K01066 | 0        | 5        | 7        | 2        | 16       | 18       | 3        | 6        | 3        | 0        | 2       | 3        | 11       | 8        | 3        | 0        | 4        | 16       | 5        |
| K01075 | 0        | 1        | 1        | 0        | 1        | 2        | 1        | 2        | 0        | 0        | 0       | 0        | 1        | 1        | 0        | 0        | 0        | 5        | 0        |
| K01077 | 2        | 4        | 7        | 4        | 14       | 15       | 3        | 10       | 2        | 1        | 6       | 7        | 10       | 8        | 1        | 0        | 4        | 8        | 5        |
| K01101 | 1        | 0        | 4        | 0        | 1        | 5        | 1        | 1        | 1        | 1        | 6       | 0        | 4        | 0        | 7        | 2        | 2        | 4        | 3        |
| K01195 | 4        | 3        | 9        | 5        | 13       | 14       | 3        | 12       | 1        | 0        | 1       | 4        | 6        | 8        | 2        | 1        | 3        | 8        | 7        |
| K01426 | 0        | 0        | 0        | 0        | 1        | 1        | 0        | 1        | 0        | 0        | 0       | 0        | 1        | 0        | 0        | 0        | 1        | 1        | 1        |
| K01428 | 0        | 2        | 0        | 0        | 2        | 0        | 0        | 2        | 0        | 0        | 0       | 0        | 3        | 0        | 0        | 0        | 0        | 0        | 0        |
| K01457 | 0        | 0        | 0        | 1        | 1        | 0        | 0        | 0        | 0        | 0        | 0       | 0        | 0        | 0        | 0        | 0        | 0        | 0        | 0        |
| K01464 | 0        | 0        | 0        | 0        | 0        | 3        | 1        | 1        | 0        | 0        | 2       | 1        | 2        | 0        | 0        | 0        | 1        | 3        | 3        |
| K01489 | 10       | 8        | 31       | 8        | 27       | 27       | 6        | 23       | 7        | 4        | 16      | 7        | 17       | 17       | 10       | 7        | 10       | 20       | 15       |
| K01500 | 0        | 1        | 0        | 0        | 0        | 0        | 0        | 0        | 0        | 0        | 0       | 0        | 0        | 1        | 0        | 0        | 0        | 0        | 0        |
| K01501 | 1        | 0        | 0        | 0        | 2        | 1        | 0        | 2        | 0        | 0        | 3       | 0        | 3        | 0        | 0        | 3        | 0        | 6        | 0        |
| K01502 | 0        | 0        | 1        | 0        | 0        | 0        | 0        | 0        | 0        | 0        | 0       | 0        | 0        | 0        | 0        | 0        | 0        | 1        | 0        |
| K01512 | 6        | 7        | 9        | 3        | 11       | 9        | 4        | 10       | 4        | 0        | 4       | 7        | 4        | 8        | 1        | 2        | 2        | 10       | 2        |
| K01560 | 3        | 1        | 8        | 0        | 6        | 10       | 2        | 6        | 1        | 0        | 5       | 1        | 3        | 5        | 7        | 2        | 2        | 7        | 5        |
| K01561 | 0        | 0        | 0        | 0        | 0        | 0        | 0        | 2        | 0        | 0        | 0       | 0        | 1        | 0        | 0        | 0        | 0        | 1        | 0        |
| K01563 | 0        | 0        | 0        | 0        | 0        | 0        | 0        | 0        | 0        | 0        | 0       | 0        | 0        | 0        | 0        | 0        | 0        | 0        | 0        |
| K01564 | 0        | 1        | 2        | 0        | 2        | 1        | 0        | 4        | 1        | 0        | 0       | 1        | 4        | 0        | 0        | 0        | 2        | 4        | 1        |
| K01607 | 7        | 5        | 15       | 4        | 24       | 11       | 8        | 16       | 2        | 1        | 18      | 4        | 18       | 11       | 3        | 3        | 11       | 16       | 8        |
| K01612 | 0        | 0        | 0        | 0        | 1        | 0        | 0        | 0        | 0        | 0        | 0       | 0        | 0        | 0        | 0        | 0        | 0        | 0        | 0        |
| K01615 | 1        | 1        | 22       | 2        | 18       | 14       | 4        | 12       | 2        | 2        | 10      | 4        | 23       | 6        | 3        | 5        | 11       | 10       | 12       |
| K01617 | 0        | 0        | 0        | 0        | 0        | 0        | 0        | 0        | 0        | 0        | 0       | 0        | 0        | 0        | 0        | 0        | 0        | 0        | 0        |
| K01666 | 3        | 3        | 4        | 3        | 11       | 11       | 3        | 9        | 3        | 1        | 0       | 2        | 2        | 2        | 1        | 4        | 2        | 5        | 5        |
| K01692 | 0        | 1        | 0        | 0        | 1        | 1        | 0        | 1        | 0        | 0        | 0       | 1        | 0        | 1        | 0        | 0        | 0        | 1        | 0        |
| K01721 | 0        | 0        | 0        | 0        | 0        | 0        | 0        | 0        | 0        | 0        | 0       | 0        | 0        | 0        | 0        | 0        | 0        | 0        | 0        |
| K01726 | 2        | 3        | 6        | 3        | 9        | 9        | 2        | 9        | 2        | 1        | 1       | 2        | 13       | 5        | 1        | 2        | 4        | 14       | 7        |
| K01781 | 0        | 0        | 0        | 0        | 1        | 1        | 0        | 0        | 0        | 0        | 0       | 0        | 2        | 0        | 0        | 0        | 0        | 0        | 0        |
| K01821 | 0        | 4        | 1        | 0        | 4        | 1        | 2        | 3        | 0        | 1        | 0       | 1        | 2        | 2        | 0        | 1        | 1        | 5        | 1        |
| K01856 | 0        | 0        | 0        | 0        | 0        | 0        | 0        | 0        | 0        | 0        | 1       | 0        | 0        | 0        | 0        | 0        | 0        | 0        | 0        |
| K01857 | 0        | 0        | 0        | 0        | 0        | 0        | 0        | 1        | 0        | 0        | 0       | 0        | 0        | 0        | 0        | 0        | 0        | 1        | 1        |
| K01913 | 0        | 0        | 1        | 0        | 0        | 1        | 0        | 2        | 1        | 0        | 0       | 0        | 0        | 0        | 0        | 0        | 1        | 0        | 0        |
| K01951 | 3        | 5        | 18       | 3        | 19       | 15       | 0        | 16       | 6        | 3        | 9       | 6        | 20       | 4        | 6        | 3        | 8        | 15       | 15       |
| K02554 | 0        | 0        | 0        | 0        | 0        | 0        | 0        | 0        | 0        | 0        | 0       | 0        | 1        | 0        | 0        | 0        | 0        | 0        | 0        |
| K03381 | 0        | 0        | 0        | 0        | 0        | 0        | 0        | 0        | 0        | 0        | 0       | 0        | 0        | 0        | 0        | 0        | 0        | 0        | 0        |
| K03382 | 0        | 1        | 0        | 0        | 3        | 0        | 0        | 0        | 0        | 0        | 0       | 0        | 0        | 0        | 0        | 0        | 0        | 0        | 0        |
| K03464 | 0        | 1        | 0        | 0        | 0        | 0        | 0        | 0        | 0        | 0        | 0       | 0        | 0        | 0        | 0        | 0        | 0        | 0        | 0        |
| K03518 | 5        | 1        | 7        | 1        | 15       | 15       | 4        | 13       | 3        | 1        | 13      | 3        | 13       | 3        | 1        | 2        | 1        | 9        | 8        |
| K03862 | 0        | 1        | 0        | 0        | 0        | 0        | 0        | 0        | 0        | 0        | 0       | 0        | 0        | 0        | 0        | 0        | 0        | 1        | 0        |
| K04099 | 0        | 1        | 0        | 0        | 0        | 0        | 0        | 0        | 0        | 0        | 0       | 0        | 0        | 0        | 0        | 0        | 0        | 0        | 0        |
| K04100 | 0        | 0        | 0        | 0        | 0        | 0        | 0        | 0        | 0        | 0        | 0       | 0        | 0        | 0        | 0        | 0        | 0        | 0        | 0        |
| K04102 | 0        | 0        | 0        | 0        | 0        | 0        | 0        | 0        | 0        | 0        | 0       | 0        | 0        | 0        | 0        | 0        | 0        | 1        | 0        |
| K04116 | 0        | 0        | 0        | 0        | 0        | 0        | 0        | 0        | 0        | 0        | 0       | 0        | 0        | 0        | 0        | 0        | 0        | 0        | 0        |
| K05394 | 0        | 0        | 0        | 0        | 0        | 0        | 1        | 0        | 0        | 0        | 0       | 2        | 1        | 0        | 0        | 0        | 0        | 1        | 1        |

| EC/KO  | DA-AD-10 | DA-AD-11 | DA-AD-12 | DA-AD-13 | DA-AD-14 | DA-AD-15 | DA-AD-16 | DA-AD-17 | DA-AD-18 | DA-AD-19 | DA-AD-2 | DA-AD-20 | DA-AD-21 | DA-AD-22 | DA-AD-23 | DA-AD-24 | DA-AD-25 | DA-AD-26 | DA-AD-27 |
|--------|----------|----------|----------|----------|----------|----------|----------|----------|----------|----------|---------|----------|----------|----------|----------|----------|----------|----------|----------|
| K05549 | 0        | 1        | 0        | 0        | 0        | 0        | 0        | 0        | 0        | 0        | 0       | 0        | 0        | 0        | 0        | 0        | 0        | 0        | 0        |
| K05783 | 0        | 1        | 0        | 0        | 0        | 0        | 0        | 0        | 0        | 0        | 0       | 0        | 0        | 0        | 0        | 0        | 0        | 0        | 0        |
| K05797 | 0        | 0        | 0        | 0        | 0        | 0        | 0        | 0        | 0        | 0        | 0       | 0        | 0        | 0        | 0        | 0        | 0        | 0        | 0        |
| K06281 | 0        | 0        | 0        | 0        | 2        | 2        | 0        | 4        | 0        | 0        | 1       | 0        | 3        | 0        | 1        | 0        | 2        | 5        | 1        |
| K06446 | 0        | 0        | 5        | 1        | 3        | 2        | 1        | 2        | 1        | 0        | 6       | 0        | 5        | 1        | 1        | 1        | 0        | 5        | 3        |
| K06912 | 0        | 0        | 0        | 0        | 0        | 0        | 0        | 0        | 0        | 0        | 0       | 0        | 0        | 0        | 0        | 0        | 0        | 0        | 0        |
| K07535 | 0        | 0        | 0        | 0        | 1        | 0        | 0        | 0        | 0        | 0        | 1       | 0        | 0        | 0        | 0        | 0        | 0        | 0        | 0        |
| K07536 | 0        | 1        | 1        | 1        | 2        | 1        | 0        | 3        | 1        | 1        | 0       | 2        | 0        | 0        | 2        | 1        | 0        | 4        | 0        |
| K08689 | 0        | 0        | 0        | 0        | 0        | 0        | 0        | 0        | 0        | 0        | 0       | 0        | 0        | 0        | 0        | 0        | 0        | 0        | 0        |
| K08710 | 0        | 0        | 0        | 0        | 0        | 0        | 0        | 0        | 0        | 0        | 0       | 0        | 0        | 0        | 0        | 0        | 0        | 0        | 0        |
| K09461 | 0        | 0        | 1        | 0        | 0        | 0        | 0        | 0        | 0        | 0        | 0       | 0        | 1        | 0        | 0        | 0        | 0        | 1        | 0        |
| K10217 | 0        | 0        | 0        | 0        | 0        | 0        | 0        | 0        | 0        | 0        | 0       | 0        | 0        | 0        | 0        | 0        | 0        | 0        | 0        |
| K10218 | 0        | 0        | 2        | 0        | 0        | 0        | 0        | 0        | 0        | 0        | 0       | 0        | 2        | 0        | 0        | 0        | 0        | 1        | 0        |
| K10220 | 0        | 0        | 0        | 0        | 0        | 0        | 0        | 0        | 0        | 0        | 0       | 0        | 0        | 0        | 0        | 0        | 0        | 0        | 0        |
| K11180 | 0        | 0        | 0        | 0        | 0        | 0        | 0        | 0        | 0        | 0        | 0       | 0        | 1        | 0        | 0        | 0        | 0        | 1        | 0        |
| K13953 | 0        | 1        | 0        | 0        | 0        | 1        | 0        | 0        | 0        | 0        | 1       | 0        | 0        | 0        | 0        | 0        | 0        | 1        | 0        |
| K14333 | 0        | 1        | 0        | 0        | 0        | 0        | 0        | 0        | 0        | 0        | 0       | 0        | 0        | 0        | 0        | 0        | 0        | 0        | 0        |
| K14519 | 0        | 0        | 0        | 0        | 0        | 0        | 0        | 0        | 0        | 0        | 0       | 0        | 0        | 0        | 0        | 0        | 0        | 0        | 0        |
| K15054 | 0        | 1        | 0        | 0        | 0        | 0        | 0        | 0        | 0        | 0        | 0       | 0        | 0        | 0        | 0        | 0        | 0        | 0        | 0        |
| K16173 | 0        | 0        | 0        | 0        | 2        | 0        | 0        | 1        | 0        | 0        | 0       | 0        | 1        | 0        | 0        | 0        | 0        | 1        | 1        |
| K16514 | 0        | 0        | 0        | 0        | 0        | 0        | 0        | 0        | 0        | 0        | 0       | 0        | 1        | 0        | 0        | 0        | 0        | 1        | 0        |
| K16874 | 0        | 0        | 0        | 0        | 0        | 0        | 0        | 0        | 0        | 0        | 0       | 0        | 0        | 0        | 0        | 0        | 0        | 1        | 0        |

| EC/KO       | DA-AD-28 | DA-AD-29 | DA-AD-3 | DA-AD-30 | DA-AD-31 | DA-AD-32 | DA-AD-33 | DA-AD-34 | DA-AD-35 | DA-AD-36 | DA-AD-37 | DA-AD-38 | DA-AD-39 | DA-AD-4 | DA-AD-40 | DA-AD-41 | DA-AD-42 | DA-AD-43 | DA-AD-44 |
|-------------|----------|----------|---------|----------|----------|----------|----------|----------|----------|----------|----------|----------|----------|---------|----------|----------|----------|----------|----------|
| 1.1.1.-     | 14       | 56       | 44      | 27       | 37       | 59       | 22       | 53       | 39       | 42       | 51       | 60       | 51       | 33      | 64       | 43       | 62       | 53       | 68       |
| 1.1.1.1     | 1        | 43       | 19      | 18       | 24       | 32       | 19       | 35       | 30       | 25       | 32       | 35       | 52       | 19      | 37       | 34       | 43       | 33       | 40       |
| 1.1.1.157   | 0        | 0        | 2       | 1        | 0        | 0        | 0        | 0        | 0        | 1        | 0        | 1        | 0        | 1       | 1        | 0        | 2        | 1        | 0        |
| 1.1.1.205   | 2        | 24       | 16      | 22       | 13       | 21       | 7        | 23       | 21       | 17       | 22       | 27       | 29       | 15      | 23       | 22       | 24       | 21       | 21       |
| 1.1.1.35    | 0        | 3        | 4       | 4        | 1        | 4        | 0        | 5        | 6        | 2        | 5        | 4        | 0        | 3       | 1        | 2        | 4        | 3        | 3        |
| 1.1.2.99.6  | 0        | 3        | 2       | 0        | 1        | 0        | 0        | 1        | 0        | 1        | 2        | 2        | 0        | 0       | 0        | 1        | 1        | 0        | 2        |
| 1.1.3.11.-  | 0        | 0        | 0       | 0        | 0        | 0        | 0        | 0        | 0        | 0        | 0        | 0        | 0        | 0       | 0        | 0        | 0        | 0        | 0        |
| 1.1.3.11.1  | 0        | 0        | 0       | 0        | 0        | 0        | 0        | 0        | 0        | 0        | 0        | 0        | 0        | 0       | 0        | 0        | 0        | 0        | 0        |
| 1.1.3.11.2  | 0        | 0        | 0       | 0        | 0        | 0        | 0        | 0        | 0        | 0        | 0        | 0        | 0        | 0       | 0        | 0        | 0        | 0        | 0        |
| 1.1.3.11.3  | 0        | 1        | 0       | 0        | 0        | 0        | 0        | 0        | 0        | 0        | 0        | 0        | 0        | 0       | 0        | 0        | 0        | 0        | 0        |
| 1.1.3.11.39 | 0        | 0        | 0       | 0        | 0        | 0        | 0        | 0        | 0        | 0        | 0        | 0        | 0        | 0       | 0        | 0        | 0        | 0        | 0        |
| 1.1.3.11.5  | 0        | 0        | 0       | 0        | 1        | 0        | 0        | 0        | 1        | 0        | 0        | 0        | 0        | 0       | 0        | 0        | 0        | 0        | 0        |
| 1.1.3.11.8  | 0        | 1        | 0       | 0        | 0        | 0        | 0        | 0        | 0        | 0        | 0        | 0        | 0        | 0       | 0        | 0        | 0        | 0        | 0        |
| 1.1.4.12.10 | 0        | 1        | 0       | 0        | 0        | 0        | 0        | 0        | 0        | 0        | 0        | 0        | 0        | 0       | 0        | 0        | 0        | 0        | 0        |
| 1.1.4.12.13 | 0        | 0        | 0       | 0        | 0        | 0        | 0        | 0        | 0        | 0        | 0        | 0        | 0        | 0       | 0        | 0        | 0        | 0        | 0        |
| 1.1.4.12.18 | 0        | 0        | 0       | 0        | 0        | 0        | 0        | 0        | 0        | 0        | 0        | 0        | 0        | 0       | 0        | 0        | 0        | 0        | 0        |
| 1.1.4.13.-  | 0        | 4        | 0       | 0        | 0        | 1        | 0        | 0        | 0        | 0        | 0        | 0        | 0        | 0       | 0        | 0        | 1        | 0        | 0        |
| 1.1.4.13.1  | 0        | 0        | 0       | 0        | 0        | 0        | 0        | 0        | 0        | 0        | 0        | 0        | 0        | 0       | 0        | 0        | 0        | 0        | 0        |
| 1.1.4.13.2  | 0        | 1        | 0       | 0        | 0        | 0        | 0        | 0        | 0        | 0        | 0        | 0        | 0        | 0       | 0        | 0        | 0        | 0        | 0        |
| 1.1.4.13.50 | 0        | 0        | 0       | 0        | 0        | 0        | 0        | 0        | 0        | 0        | 0        | 0        | 0        | 0       | 0        | 0        | 0        | 0        | 0        |
| 1.1.4.13.7  | 0        | 0        | 0       | 0        | 0        | 0        | 0        | 0        | 0        | 0        | 0        | 0        | 1        | 0       | 0        | 0        | 0        | 1        | 0        |
| 1.1.4.13.8  | 0        | 0        | 0       | 0        | 0        | 0        | 0        | 0        | 0        | 0        | 0        | 0        | 0        | 0       | 0        | 0        | 0        | 0        | 0        |
| 1.1.4.13.82 | 0        | 0        | 0       | 0        | 0        | 0        | 0        | 0        | 0        | 0        | 0        | 0        | 0        | 0       | 0        | 0        | 0        | 0        | 0        |
| 1.1.4.99.-  | 0        | 0        | 0       | 0        | 0        | 0        | 0        | 0        | 0        | 0        | 0        | 0        | 0        | 0       | 0        | 0        | 0        | 0        | 0        |
| 1.1.7.99.1  | 0        | 0        | 0       | 0        | 0        | 0        | 0        | 0        | 0        | 0        | 0        | 0        | 0        | 0       | 0        | 0        | 0        | 0        | 0        |
| 1.1.8.6.1   | 0        | 0        | 0       | 0        | 0        | 0        | 0        | 0        | 0        | 0        | 0        | 1        | 0        | 0       | 0        | 0        | 0        | 0        | 4        |
| 1.2.1.-     | 0        | 0        | 0       | 0        | 0        | 0        | 0        | 0        | 0        | 0        | 0        | 0        | 0        | 0       | 0        | 0        | 0        | 0        | 0        |
| 1.2.1.10    | 0        | 5        | 1       | 3        | 3        | 2        | 4        | 4        | 1        | 0        | 4        | 5        | 6        | 1       | 2        | 3        | 7        | 6        | 7        |
| 1.2.1.3     | 0        | 9        | 8       | 8        | 9        | 9        | 2        | 10       | 5        | 7        | 7        | 13       | 8        | 5       | 7        | 5        | 5        | 10       | 7        |
| 1.2.1.39    | 0        | 0        | 0       | 0        | 0        | 0        | 0        | 0        | 0        | 0        | 0        | 0        | 0        | 0       | 0        | 0        | 0        | 0        | 0        |
| 1.2.7.1     | 1        | 15       | 22      | 7        | 6        | 13       | 6        | 12       | 8        | 11       | 9        | 12       | 17       | 14      | 13       | 13       | 12       | 9        | 10       |
| 1.2.99.2    | 0        | 3        | 7       | 2        | 3        | 3        | 0        | 4        | 1        | 2        | 5        | 3        | 2        | 3       | 3        | 2        | 2        | 3        | 3        |
| 1.3.1.-     | 0        | 0        | 0       | 0        | 0        | 0        | 0        | 0        | 0        | 0        | 0        | 1        | 0        | 0       | 0        | 0        | 1        | 0        | 0        |
| 1.3.1.2     | 0        | 3        | 1       | 0        | 0        | 0        | 0        | 2        | 1        | 0        | 2        | 1        | 2        | 0       | 0        | 1        | 0        | 1        | 1        |
| 1.3.1.25    | 0        | 0        | 0       | 0        | 0        | 0        | 0        | 0        | 0        | 0        | 0        | 0        | 0        | 0       | 0        | 0        | 0        | 0        | 0        |
| 1.3.99.-    | 0        | 0        | 0       | 0        | 0        | 0        | 0        | 0        | 0        | 0        | 0        | 0        | 0        | 0       | 0        | 1        | 0        | 0        | 0        |
| 1.6.5.-     | 10       | 48       | 64      | 39       | 33       | 40       | 21       | 34       | 51       | 40       | 49       | 42       | 56       | 54      | 45       | 35       | 38       | 48       | 31       |
| 1.7.1.-     | 0        | 8        | 3       | 8        | 8        | 11       | 6        | 11       | 12       | 6        | 6        | 5        | 12       | 6       | 10       | 7        | 8        | 14       | 9        |
| 1.8.99.3    | 0        | 1        | 1       | 0        | 1        | 0        | 0        | 0        | 0        | 0        | 0        | 0        | 0        | 0       | 1        | 0        | 1        | 0        | 0        |
| 2.1.1.-     | 37       | 299      | 242     | 234      | 162      | 335      | 107      | 295      | 269      | 237      | 261      | 289      | 369      | 208     | 257      | 275      | 313      | 283      | 301      |
| 2.3.1.-     | 34       | 207      | 103     | 97       | 90       | 150      | 54       | 168      | 167      | 152      | 158      | 186      | 223      | 111     | 157      | 138      | 192      | 175      | 170      |
| 2.3.1.16    | 0        | 2        | 0       | 0        | 0        | 3        | 1        | 2        | 1        | 2        | 0        | 1        | 0        | 0       | 0        | 0        | 0        | 0        | 3        |
| 2.3.1.5     | 0        | 0        | 0       | 0        | 0        | 0        | 0        | 0        | 0        | 0        | 0        | 0        | 0        | 0       | 0        | 0        | 0        | 0        | 0        |
| 2.3.1.9     | 0        | 0        | 1       | 1        | 0        | 0        | 0        | 1        | 0        | 1        | 0        | 1        | 2        | 0       | 1        | 0        | 0        | 1        | 1        |
| 2.4.2.10    | 1        | 17       | 20      | 15       | 8        | 16       | 5        | 12       | 15       | 10       | 12       | 16       | 20       | 12      | 12       | 16       | 15       | 20       | 13       |
| 2.4.2.3     | 2        | 10       | 4       | 11       | 8        | 8        | 4        | 10       | 9        | 6        | 7        | 12       | 12       | 6       | 10       | 10       | 12       | 15       | 12       |
| 2.4.2.4     | 0        | 7        | 2       | 7        | 2        | 8        | 2        | 10       | 5        | 2        | 6        | 4        | 9        | 3       | 2        | 4        | 5        | 5        | 5        |
| 2.4.2.8     | 0        | 16       | 12      | 14       | 9        | 16       | 6        | 15       | 13       | 7        | 13       | 12       | 15       | 8       | 17       | 14       | 16       | 15       | 16       |
| 2.5.1.-     | 4        | 25       | 24      | 17       | 12       | 28       | 11       | 26       | 23       | 17       | 21       | 26       | 30       | 24      | 29       | 13       | 21       | 30       | 20       |

| EC/KO    | DA-AD-28 | DA-AD-29 | DA-AD-3 | DA-AD-30 | DA-AD-31 | DA-AD-32 | DA-AD-33 | DA-AD-34 | DA-AD-35 | DA-AD-36 | DA-AD-37 | DA-AD-38 | DA-AD-39 | DA-AD-4 | DA-AD-40 | DA-AD-41 | DA-AD-42 | DA-AD-43 | DA-AD-44 |
|----------|----------|----------|---------|----------|----------|----------|----------|----------|----------|----------|----------|----------|----------|---------|----------|----------|----------|----------|----------|
| 2.5.1.18 | 0        | 4        | 1       | 0        | 4        | 0        | 0        | 2        | 0        | 2        | 2        | 3        | 0        | 0       | 3        | 1        | 0        | 3        | 2        |
| 2.6.1.-  | 6        | 42       | 15      | 30       | 25       | 49       | 13       | 49       | 47       | 35       | 39       | 52       | 44       | 20      | 34       | 29       | 35       | 40       | 41       |
| 2.7.1.21 | 0        | 13       | 9       | 6        | 2        | 7        | 2        | 12       | 9        | 7        | 9        | 7        | 11       | 3       | 9        | 9        | 8        | 9        | 7        |
| 2.7.1.48 | 4        | 37       | 25      | 34       | 20       | 39       | 6        | 37       | 34       | 29       | 38       | 39       | 43       | 19      | 29       | 27       | 32       | 40       | 24       |
| 2.7.4.-  | 2        | 17       | 9       | 16       | 13       | 19       | 8        | 25       | 18       | 10       | 18       | 13       | 25       | 9       | 19       | 22       | 21       | 9        | 19       |
| 2.8.3.-  | 0        | 1        | 0       | 1        | 1        | 1        | 2        | 1        | 1        | 0        | 3        | 2        | 2        | 0       | 0        | 0        | 0        | 1        | 2        |
| 2.8.3.1  | 0        | 0        | 1       | 1        | 0        | 0        | 0        | 0        | 0        | 0        | 0        | 1        | 0        | 0       | 0        | 0        | 0        | 0        | 2        |
| 2.8.3.12 | 1        | 1        | 2       | 0        | 0        | 0        | 0        | 0        | 1        | 0        | 0        | 2        | 2        | 2       | 1        | 0        | 0        | 0        | 0        |
| 2.8.3.6  | 0        | 2        | 2       | 0        | 2        | 0        | 0        | 0        | 0        | 0        | 0        | 0        | 1        | 0       | 0        | 0        | 0        | 0        | 0        |
| 2.8.3.8  | 0        | 0        | 4       | 0        | 2        | 0        | 0        | 1        | 1        | 1        | 1        | 1        | 1        | 2       | 0        | 2        | 3        | 1        | 1        |
| 3.1.1.-  | 1        | 9        | 2       | 2        | 5        | 6        | 3        | 4        | 5        | 6        | 3        | 8        | 3        | 7       | 3        | 5        | 4        | 4        | 4        |
| 3.1.1.1  | 0        | 8        | 6       | 2        | 2        | 6        | 1        | 8        | 7        | 5        | 7        | 6        | 9        | 4       | 10       | 3        | 7        | 4        | 9        |
| 3.1.1.17 | 0        | 3        | 0       | 0        | 0        | 2        | 0        | 3        | 0        | 2        | 4        | 3        | 4        | 0       | 1        | 1        | 1        | 2        | 1        |
| 3.1.1.2  | 0        | 1        | 0       | 0        | 1        | 0        | 0        | 0        | 1        | 0        | 1        | 0        | 0        | 0       | 0        | 0        | 0        | 1        | 0        |
| 3.1.1.24 | 0        | 3        | 3       | 6        | 0        | 4        | 0        | 2        | 2        | 2        | 3        | 4        | 4        | 1       | 2        | 4        | 3        | 2        | 2        |
| 3.1.1.45 | 0        | 1        | 0       | 0        | 0        | 0        | 0        | 0        | 0        | 0        | 0        | 0        | 0        | 0       | 0        | 0        | 0        | 0        | 0        |
| 3.1.2.-  | 0        | 0        | 1       | 0        | 0        | 0        | 0        | 0        | 1        | 0        | 0        | 0        | 2        | 1       | 1        | 1        | 0        | 0        | 0        |
| 3.1.2.23 | 1        | 8        | 2       | 1        | 2        | 4        | 2        | 5        | 5        | 4        | 6        | 5        | 9        | 0       | 4        | 5        | 7        | 4        | 3        |
| 3.1.3.1  | 2        | 17       | 5       | 9        | 8        | 11       | 6        | 16       | 17       | 15       | 19       | 15       | 20       | 9       | 17       | 11       | 16       | 14       | 8        |
| 3.1.3.2  | 1        | 5        | 1       | 2        | 3        | 4        | 3        | 3        | 4        | 6        | 7        | 6        | 5        | 3       | 5        | 5        | 2        | 2        | 2        |
| 3.1.3.41 | 0        | 0        | 0       | 0        | 0        | 0        | 0        | 0        | 0        | 0        | 0        | 0        | 0        | 0       | 1        | 0        | 0        | 0        | 0        |
| 3.2.1.31 | 2        | 0        | 2       | 2        | 3        | 6        | 3        | 7        | 1        | 2        | 1        | 7        | 10       | 3       | 9        | 3        | 4        | 11       | 4        |
| 3.3.2.9  | 0        | 0        | 0       | 0        | 0        | 0        | 0        | 0        | 0        | 0        | 0        | 0        | 0        | 0       | 0        | 0        | 0        | 0        | 0        |
| 3.5.1.-  | 5        | 33       | 7       | 28       | 19       | 41       | 15       | 38       | 29       | 16       | 17       | 30       | 33       | 22      | 27       | 28       | 30       | 27       | 31       |
| 3.5.1.4  | 1        | 2        | 3       | 1        | 1        | 6        | 1        | 1        | 3        | 3        | 4        | 3        | 2        | 3       | 3        | 3        | 3        | 5        | 4        |
| 3.5.1.5  | 2        | 2        | 0       | 2        | 2        | 2        | 0        | 2        | 1        | 0        | 1        | 1        | 3        | 0       | 3        | 2        | 2        | 1        | 1        |
| 3.5.1.54 | 0        | 6        | 6       | 5        | 1        | 3        | 0        | 2        | 4        | 2        | 1        | 2        | 6        | 5       | 3        | 2        | 3        | 0        | 3        |
| 3.5.1.6  | 0        | 3        | 3       | 2        | 1        | 1        | 0        | 0        | 1        | 0        | 0        | 0        | 1        | 1       | 0        | 2        | 2        | 0        | 2        |
| 3.5.2.-  | 0        | 0        | 0       | 0        | 0        | 0        | 0        | 0        | 0        | 0        | 0        | 0        | 0        | 0       | 0        | 0        | 0        | 0        | 0        |
| 3.5.2.2  | 0        | 0        | 0       | 1        | 0        | 0        | 0        | 0        | 1        | 1        | 1        | 1        | 3        | 1       | 1        | 2        | 3        | 1        | 3        |
| 3.5.4.-  | 7        | 35       | 23      | 27       | 15       | 31       | 16       | 32       | 21       | 22       | 28       | 25       | 40       | 29      | 23       | 25       | 25       | 25       | 28       |
| 3.5.4.5  | 0        | 15       | 13      | 17       | 8        | 23       | 5        | 18       | 16       | 12       | 15       | 19       | 21       | 10      | 8        | 16       | 13       | 19       | 15       |
| 3.5.5.1  | 1        | 1        | 0       | 3        | 0        | 1        | 1        | 0        | 0        | 1        | 4        | 1        | 1        | 0       | 2        | 1        | 2        | 0        | 1        |
| 3.5.5.7  | 0        | 0        | 0       | 0        | 1        | 0        | 0        | 0        | 0        | 0        | 0        | 0        | 0        | 0       | 0        | 0        | 0        | 0        | 0        |
| 3.5.99.3 | 0        | 0        | 0       | 0        | 0        | 0        | 0        | 0        | 0        | 0        | 1        | 0        | 0        | 0       | 0        | 0        | 0        | 0        | 0        |
| 3.6.1.7  | 1        | 3        | 5       | 3        | 2        | 5        | 2        | 6        | 3        | 5        | 5        | 5        | 5        | 5       | 8        | 3        | 4        | 4        | 7        |
| 3.7.1.-  | 0        | 4        | 1       | 0        | 1        | 0        | 0        | 0        | 0        | 0        | 0        | 0        | 2        | 2       | 3        | 2        | 0        | 0        | 2        |
| 3.7.1.2  | 1        | 3        | 2       | 1        | 2        | 4        | 1        | 5        | 5        | 1        | 5        | 4        | 6        | 1       | 5        | 2        | 3        | 4        | 3        |
| 3.8.1.2  | 1        | 11       | 0       | 2        | 0        | 9        | 1        | 3        | 4        | 5        | 8        | 8        | 7        | 2       | 7        | 3        | 3        | 6        | 7        |
| 3.8.1.3  | 0        | 0        | 0       | 0        | 0        | 0        | 0        | 0        | 0        | 0        | 0        | 0        | 0        | 0       | 0        | 0        | 0        | 0        | 0        |
| 3.8.1.5  | 0        | 0        | 2       | 0        | 1        | 0        | 0        | 0        | 0        | 0        | 2        | 1        | 1        | 0       | 0        | 1        | 1        | 0        | 0        |
| 4.1.1.-  | 3        | 14       | 10      | 8        | 8        | 14       | 4        | 9        | 10       | 7        | 12       | 9        | 11       | 3       | 12       | 9        | 9        | 9        | 10       |
| 4.1.1.44 | 6        | 28       | 30      | 14       | 8        | 20       | 8        | 23       | 24       | 22       | 22       | 25       | 36       | 33      | 25       | 27       | 25       | 25       | 24       |
| 4.1.1.55 | 0        | 0        | 0       | 0        | 0        | 0        | 0        | 0        | 0        | 0        | 0        | 0        | 0        | 0       | 0        | 0        | 0        | 0        | 0        |
| 4.1.1.7  | 0        | 0        | 0       | 0        | 0        | 0        | 0        | 0        | 0        | 0        | 0        | 0        | 0        | 0       | 0        | 0        | 0        | 0        | 0        |
| 4.1.1.70 | 0        | 0        | 0       | 0        | 0        | 0        | 0        | 0        | 0        | 0        | 0        | 0        | 0        | 0       | 1        | 0        | 0        | 0        | 0        |
| 4.1.1.77 | 0        | 0        | 1       | 0        | 0        | 0        | 0        | 0        | 0        | 0        | 0        | 0        | 0        | 1       | 0        | 0        | 0        | 0        | 0        |
| 4.1.2.-  | 1        | 5        | 5       | 3        | 4        | 1        | 2        | 5        | 2        | 6        | 9        | 3        | 4        | 2       | 3        | 6        | 8        | 2        | 6        |
| 4.1.3.-  | 2        | 18       | 17      | 16       | 12       | 26       | 7        | 25       | 22       | 18       | 14       | 22       | 27       | 16      | 24       | 17       | 19       | 27       | 24       |

| EC/KO    | DA-AD-28 | DA-AD-29 | DA-AD-3 | DA-AD-30 | DA-AD-31 | DA-AD-32 | DA-AD-33 | DA-AD-34 | DA-AD-35 | DA-AD-36 | DA-AD-37 | DA-AD-38 | DA-AD-39 | DA-AD-4 | DA-AD-40 | DA-AD-41 | DA-AD-42 | DA-AD-43 | DA-AD-44 |
|----------|----------|----------|---------|----------|----------|----------|----------|----------|----------|----------|----------|----------|----------|---------|----------|----------|----------|----------|----------|
| 4.1.3.39 | 0        | 0        | 0       | 0        | 0        | 0        | 1        | 1        | 1        | 2        | 0        | 0        | 0        | 1       | 2        | 0        | 0        | 0        | 1        |
| 4.1.99.- | 1        | 1        | 0       | 1        | 1        | 8        | 3        | 3        | 3        | 1        | 1        | 1        | 5        | 1       | 3        | 2        | 2        | 5        | 3        |
| 4.2.1.-  | 6        | 65       | 39      | 36       | 34       | 51       | 16       | 58       | 55       | 42       | 50       | 60       | 61       | 40      | 45       | 40       | 45       | 55       | 53       |
| 4.2.1.17 | 1        | 10       | 6       | 3        | 2        | 7        | 1        | 7        | 10       | 3        | 1        | 2        | 12       | 5       | 4        | 3        | 6        | 5        | 7        |
| 4.2.1.80 | 0        | 0        | 0       | 0        | 0        | 0        | 0        | 0        | 0        | 0        | 0        | 0        | 0        | 0       | 0        | 0        | 0        | 0        | 1        |
| 4.2.1.83 | 0        | 1        | 0       | 0        | 1        | 3        | 0        | 1        | 1        | 0        | 2        | 0        | 2        | 0       | 0        | 0        | 0        | 4        | 1        |
| 4.2.1.84 | 0        | 0        | 0       | 1        | 2        | 2        | 1        | 0        | 1        | 0        | 0        | 0        | 0        | 0       | 0        | 0        | 0        | 1        | 1        |
| 5.1.2.2  | 0        | 0        | 0       | 0        | 0        | 0        | 0        | 0        | 0        | 0        | 0        | 0        | 0        | 0       | 0        | 0        | 0        | 0        | 0        |
| 5.2.1.2  | 0        | 0        | 1       | 0        | 0        | 0        | 0        | 0        | 0        | 0        | 0        | 0        | 0        | 0       | 0        | 0        | 0        | 0        | 0        |
| 5.3.3.4  | 0        | 0        | 0       | 0        | 0        | 0        | 0        | 0        | 0        | 0        | 0        | 0        | 0        | 0       | 0        | 1        | 0        | 0        | 0        |
| 5.3.99.- | 0        | 4        | 7       | 2        | 1        | 6        | 0        | 4        | 3        | 1        | 1        | 6        | 5        | 4       | 3        | 3        | 3        | 4        | 2        |
| 5.4.99.- | 1        | 0        | 1       | 0        | 1        | 1        | 0        | 0        | 0        | 0        | 0        | 0        | 1        | 1       | 1        | 0        | 0        | 1        | 0        |
| 5.5.1.1  | 1        | 5        | 1       | 4        | 0        | 4        | 0        | 1        | 2        | 5        | 4        | 5        | 5        | 1       | 3        | 3        | 2        | 4        | 2        |
| 5.5.1.2  | 0        | 0        | 0       | 0        | 0        | 0        | 0        | 0        | 0        | 0        | 0        | 0        | 0        | 0       | 0        | 0        | 0        | 0        | 0        |
| 6.2.1.-  | 0        | 0        | 0       | 0        | 0        | 0        | 0        | 0        | 0        | 0        | 0        | 0        | 0        | 0       | 0        | 0        | 0        | 0        | 0        |
| 6.3.5.2  | 2        | 14       | 16      | 9        | 9        | 22       | 5        | 16       | 12       | 14       | 23       | 17       | 19       | 12      | 17       | 15       | 18       | 19       | 14       |
| K00002   | 0        | 3        | 1       | 1        | 0        | 3        | 0        | 3        | 1        | 1        | 3        | 0        | 4        | 1       | 1        | 2        | 3        | 1        | 1        |
| K00055   | 0        | 0        | 0       | 0        | 0        | 0        | 0        | 0        | 0        | 0        | 0        | 0        | 1        | 0       | 0        | 0        | 0        | 0        | 0        |
| K00074   | 0        | 2        | 8       | 5        | 1        | 3        | 0        | 5        | 7        | 4        | 5        | 5        | 0        | 9       | 3        | 3        | 5        | 4        | 4        |
| K00088   | 1        | 20       | 9       | 14       | 11       | 16       | 9        | 17       | 17       | 10       | 17       | 19       | 19       | 9       | 13       | 16       | 13       | 15       | 12       |
| K00100   | 5        | 67       | 43      | 31       | 26       | 48       | 15       | 54       | 51       | 46       | 50       | 57       | 57       | 17      | 46       | 39       | 49       | 47       | 53       |
| K00128   | 0        | 5        | 0       | 1        | 1        | 3        | 1        | 4        | 3        | 2        | 3        | 3        | 2        | 0       | 2        | 4        | 2        | 3        | 2        |
| K00129   | 0        | 0        | 0       | 0        | 0        | 0        | 0        | 0        | 0        | 0        | 0        | 0        | 0        | 0       | 0        | 0        | 0        | 0        | 0        |
| K00132   | 0        | 0        | 1       | 0        | 0        | 0        | 0        | 0        | 0        | 0        | 0        | 0        | 1        | 0       | 0        | 1        | 0        | 0        | 1        |
| K00141   | 0        | 0        | 0       | 0        | 0        | 0        | 0        | 0        | 0        | 0        | 0        | 0        | 0        | 0       | 0        | 0        | 0        | 0        | 0        |
| K00146   | 0        | 0        | 0       | 0        | 0        | 0        | 0        | 0        | 0        | 0        | 0        | 0        | 0        | 0       | 0        | 0        | 0        | 0        | 0        |
| K00148   | 0        | 0        | 0       | 0        | 0        | 0        | 0        | 0        | 0        | 0        | 0        | 0        | 0        | 0       | 0        | 0        | 0        | 0        | 0        |
| K00155   | 0        | 2        | 0       | 0        | 0        | 0        | 0        | 0        | 0        | 0        | 0        | 0        | 0        | 0       | 0        | 0        | 0        | 0        | 0        |
| K00169   | 0        | 2        | 1       | 0        | 0        | 3        | 2        | 4        | 0        | 1        | 2        | 2        | 0        | 2       | 1        | 0        | 3        | 4        | 4        |
| K00224   | 0        | 1        | 2       | 0        | 0        | 0        | 0        | 1        | 0        | 0        | 0        | 1        | 0        | 0       | 0        | 0        | 0        | 1        | 1        |
| K00274   | 0        | 0        | 0       | 0        | 0        | 0        | 0        | 0        | 0        | 0        | 0        | 0        | 0        | 0       | 0        | 0        | 0        | 0        | 0        |
| K00446   | 0        | 0        | 0       | 0        | 0        | 0        | 0        | 0        | 0        | 0        | 0        | 0        | 0        | 0       | 0        | 0        | 0        | 0        | 0        |
| K00448   | 0        | 1        | 0       | 0        | 0        | 0        | 0        | 0        | 0        | 0        | 0        | 0        | 0        | 0       | 0        | 0        | 0        | 0        | 0        |
| K00462   | 0        | 1        | 0       | 0        | 1        | 1        | 0        | 0        | 1        | 2        | 0        | 0        | 1        | 1       | 1        | 1        | 0        | 1        | 2        |
| K00480   | 0        | 0        | 0       | 0        | 0        | 0        | 0        | 0        | 0        | 0        | 0        | 0        | 0        | 0       | 0        | 0        | 0        | 0        | 0        |
| K00481   | 0        | 1        | 0       | 0        | 0        | 0        | 0        | 0        | 0        | 0        | 0        | 0        | 0        | 0       | 0        | 0        | 0        | 0        | 0        |
| K00539   | 0        | 2        | 2       | 0        | 0        | 1        | 1        | 1        | 0        | 1        | 1        | 1        | 2        | 0       | 0        | 1        | 1        | 2        | 1        |
| K00599   | 3        | 55       | 24      | 32       | 31       | 51       | 22       | 53       | 48       | 39       | 32       | 57       | 53       | 26      | 48       | 36       | 43       | 70       | 62       |
| K00626   | 0        | 4        | 2       | 3        | 0        | 3        | 1        | 2        | 1        | 4        | 0        | 2        | 3        | 0       | 2        | 1        | 1        | 2        | 3        |
| K00632   | 0        | 0        | 0       | 0        | 0        | 0        | 0        | 0        | 0        | 0        | 0        | 0        | 0        | 0       | 0        | 0        | 0        | 0        | 0        |
| K00680   | 6        | 46       | 28      | 38       | 27       | 33       | 11       | 49       | 51       | 30       | 35       | 44       | 69       | 27      | 37       | 43       | 46       | 41       | 44       |
| K00757   | 5        | 16       | 12      | 10       | 5        | 7        | 5        | 9        | 8        | 9        | 10       | 12       | 15       | 6       | 15       | 15       | 10       | 15       | 10       |
| K00758   | 0        | 8        | 2       | 2        | 2        | 4        | 2        | 9        | 3        | 1        | 4        | 4        | 11       | 5       | 1        | 6        | 4        | 4        | 4        |
| K00760   | 2        | 23       | 24      | 20       | 15       | 22       | 8        | 23       | 24       | 18       | 19       | 17       | 33       | 20      | 24       | 30       | 29       | 24       | 21       |
| K00799   | 0        | 3        | 1       | 0        | 0        | 0        | 1        | 0        | 0        | 0        | 1        | 1        | 1        | 1       | 0        | 0        | 0        | 0        | 0        |
| K00857   | 3        | 18       | 18      | 18       | 4        | 10       | 2        | 15       | 14       | 12       | 14       | 11       | 20       | 7       | 14       | 12       | 17       | 12       | 11       |
| K00876   | 3        | 32       | 25      | 34       | 16       | 35       | 8        | 26       | 22       | 18       | 33       | 33       | 36       | 15      | 24       | 26       | 29       | 36       | 22       |
| K01026   | 0        | 0        | 3       | 0        | 0        | 0        | 0        | 0        | 1        | 0        | 0        | 0        | 0        | 0       | 1        | 1        | 2        | 0        | 0        |
| K01031   | 0        | 0        | 0       | 0        | 0        | 0        | 0        | 0        | 0        | 0        | 0        | 0        | 0        | 0       | 0        | 0        | 0        | 0        | 0        |

| EC/KO  | DA-AD-28 | DA-AD-29 | DA-AD-3 | DA-AD-30 | DA-AD-31 | DA-AD-32 | DA-AD-33 | DA-AD-34 | DA-AD-35 | DA-AD-36 | DA-AD-37 | DA-AD-38 | DA-AD-39 | DA-AD-4 | DA-AD-40 | DA-AD-41 | DA-AD-42 | DA-AD-43 | DA-AD-44 |
|--------|----------|----------|---------|----------|----------|----------|----------|----------|----------|----------|----------|----------|----------|---------|----------|----------|----------|----------|----------|
| K01034 | 1        | 3        | 4       | 1        | 0        | 0        | 1        | 1        | 1        | 3        | 1        | 1        | 2        | 2       | 0        | 1        | 2        | 2        | 1        |
| K01039 | 0        | 2        | 3       | 0        | 0        | 0        | 0        | 0        | 0        | 0        | 0        | 0        | 0        | 2       | 1        | 0        | 0        | 0        | 0        |
| K01041 | 0        | 4        | 1       | 3        | 2        | 4        | 2        | 6        | 7        | 7        | 5        | 2        | 4        | 1       | 4        | 3        | 2        | 4        | 2        |
| K01053 | 0        | 0        | 0       | 0        | 0        | 1        | 0        | 0        | 0        | 0        | 0        | 0        | 1        | 0       | 0        | 0        | 0        | 0        | 0        |
| K01055 | 0        | 0        | 0       | 0        | 0        | 0        | 0        | 0        | 0        | 0        | 0        | 0        | 0        | 0       | 0        | 0        | 0        | 0        | 0        |
| K01061 | 0        | 2        | 0       | 0        | 0        | 0        | 0        | 0        | 0        | 0        | 0        | 0        | 0        | 0       | 0        | 0        | 0        | 0        | 0        |
| K01066 | 0        | 12       | 7       | 4        | 2        | 6        | 0        | 8        | 7        | 9        | 8        | 6        | 11       | 1       | 9        | 6        | 8        | 6        | 7        |
| K01075 | 0        | 2        | 1       | 0        | 1        | 0        | 0        | 2        | 0        | 0        | 1        | 0        | 2        | 1       | 1        | 1        | 1        | 0        | 1        |
| K01077 | 1        | 10       | 2       | 1        | 4        | 6        | 2        | 7        | 9        | 9        | 9        | 8        | 15       | 2       | 8        | 4        | 5        | 8        | 5        |
| K01101 | 2        | 2        | 3       | 8        | 0        | 2        | 1        | 2        | 5        | 6        | 4        | 5        | 8        | 3       | 1        | 4        | 3        | 3        | 2        |
| K01195 | 1        | 5        | 5       | 6        | 4        | 8        | 2        | 14       | 9        | 11       | 8        | 12       | 13       | 5       | 11       | 6        | 10       | 13       | 11       |
| K01426 | 0        | 0        | 0       | 1        | 1        | 0        | 0        | 1        | 0        | 0        | 0        | 0        | 1        | 0       | 0        | 0        | 0        | 1        | 0        |
| K01428 | 0        | 1        | 0       | 1        | 1        | 0        | 0        | 0        | 0        | 0        | 0        | 1        | 0        | 0       | 2        | 0        | 1        | 1        | 1        |
| K01457 | 0        | 0        | 0       | 0        | 0        | 0        | 0        | 0        | 0        | 0        | 0        | 0        | 0        | 0       | 0        | 0        | 0        | 0        | 1        |
| K01464 | 0        | 3        | 1       | 2        | 0        | 1        | 0        | 0        | 1        | 4        | 2        | 1        | 4        | 2       | 2        | 1        | 4        | 1        | 3        |
| K01489 | 2        | 23       | 19      | 21       | 11       | 27       | 9        | 23       | 23       | 16       | 19       | 23       | 29       | 11      | 16       | 24       | 20       | 20       | 21       |
| K01500 | 0        | 0        | 0       | 0        | 1        | 0        | 0        | 0        | 0        | 0        | 1        | 0        | 0        | 0       | 0        | 0        | 0        | 0        | 0        |
| K01501 | 1        | 3        | 1       | 3        | 0        | 1        | 1        | 0        | 0        | 2        | 5        | 2        | 6        | 0       | 2        | 1        | 4        | 0        | 2        |
| K01502 | 0        | 0        | 0       | 0        | 1        | 0        | 0        | 0        | 0        | 0        | 0        | 0        | 0        | 0       | 0        | 0        | 0        | 0        | 0        |
| K01512 | 3        | 6        | 7       | 6        | 3        | 9        | 2        | 11       | 8        | 7        | 6        | 7        | 7        | 8       | 10       | 6        | 7        | 7        | 11       |
| K01560 | 3        | 6        | 9       | 7        | 1        | 3        | 0        | 2        | 2        | 7        | 2        | 7        | 7        | 2       | 7        | 5        | 6        | 6        | 4        |
| K01561 | 0        | 1        | 0       | 0        | 0        | 0        | 0        | 1        | 0        | 0        | 0        | 0        | 0        | 0       | 0        | 0        | 0        | 0        | 0        |
| K01563 | 0        | 0        | 0       | 0        | 0        | 0        | 0        | 0        | 0        | 0        | 0        | 0        | 0        | 0       | 0        | 0        | 0        | 0        | 0        |
| K01564 | 0        | 3        | 2       | 0        | 1        | 1        | 0        | 1        | 1        | 1        | 0        | 3        | 0        | 0       | 3        | 1        | 1        | 2        | 1        |
| K01607 | 2        | 19       | 12      | 5        | 4        | 9        | 7        | 9        | 10       | 11       | 12       | 10       | 21       | 19      | 8        | 11       | 13       | 9        | 8        |
| K01612 | 0        | 0        | 0       | 0        | 0        | 0        | 0        | 0        | 0        | 0        | 0        | 0        | 0        | 0       | 0        | 0        | 0        | 0        | 0        |
| K01615 | 0        | 13       | 11      | 10       | 10       | 10       | 5        | 17       | 14       | 12       | 14       | 11       | 20       | 7       | 12       | 8        | 15       | 18       | 9        |
| K01617 | 0        | 0        | 0       | 0        | 0        | 0        | 0        | 0        | 0        | 0        | 0        | 0        | 0        | 1       | 0        | 0        | 0        | 0        | 0        |
| K01666 | 0        | 5        | 2       | 5        | 4        | 12       | 4        | 10       | 7        | 7        | 2        | 8        | 9        | 3       | 10       | 7        | 5        | 9        | 10       |
| K01692 | 0        | 1        | 0       | 0        | 0        | 0        | 0        | 1        | 0        | 0        | 1        | 0        | 1        | 0       | 0        | 1        | 1        | 0        | 0        |
| K01721 | 0        | 0        | 0       | 0        | 0        | 0        | 0        | 0        | 0        | 0        | 0        | 0        | 0        | 0       | 0        | 0        | 0        | 0        | 0        |
| K01726 | 3        | 5        | 2       | 5        | 2        | 4        | 3        | 3        | 6        | 7        | 7        | 8        | 6        | 4       | 7        | 5        | 4        | 4        | 2        |
| K01781 | 0        | 0        | 0       | 0        | 0        | 0        | 0        | 0        | 0        | 0        | 0        | 0        | 0        | 0       | 1        | 0        | 0        | 0        | 0        |
| K01821 | 0        | 3        | 3       | 0        | 0        | 1        | 1        | 0        | 1        | 1        | 1        | 1        | 0        | 2       | 0        | 2        | 0        | 0        | 2        |
| K01856 | 0        | 0        | 0       | 0        | 0        | 0        | 0        | 0        | 0        | 0        | 0        | 0        | 0        | 0       | 0        | 0        | 0        | 0        | 0        |
| K01857 | 0        | 0        | 0       | 0        | 1        | 0        | 0        | 0        | 0        | 0        | 0        | 0        | 0        | 0       | 0        | 0        | 0        | 0        | 0        |
| K01913 | 0        | 0        | 0       | 0        | 0        | 0        | 0        | 1        | 0        | 0        | 0        | 0        | 0        | 0       | 0        | 1        | 1        | 0        | 1        |
| K01951 | 0        | 13       | 17      | 9        | 5        | 13       | 4        | 11       | 18       | 12       | 18       | 11       | 19       | 11      | 14       | 8        | 16       | 15       | 9        |
| K02554 | 0        | 0        | 1       | 0        | 0        | 0        | 0        | 0        | 0        | 0        | 0        | 0        | 0        | 0       | 0        | 0        | 0        | 0        | 0        |
| K03381 | 0        | 0        | 0       | 0        | 0        | 0        | 0        | 0        | 0        | 0        | 0        | 0        | 0        | 0       | 0        | 0        | 0        | 0        | 0        |
| K03382 | 0        | 0        | 1       | 0        | 0        | 1        | 0        | 0        | 0        | 1        | 2        | 1        | 0        | 0       | 1        | 0        | 0        | 0        | 0        |
| K03464 | 0        | 0        | 0       | 0        | 0        | 0        | 0        | 0        | 0        | 0        | 0        | 0        | 0        | 0       | 0        | 0        | 0        | 0        | 0        |
| K03518 | 4        | 6        | 30      | 3        | 4        | 8        | 1        | 6        | 7        | 13       | 8        | 13       | 8        | 18      | 14       | 11       | 8        | 10       | 14       |
| K03862 | 0        | 0        | 0       | 0        | 0        | 0        | 0        | 0        | 0        | 0        | 0        | 0        | 0        | 0       | 0        | 0        | 0        | 0        | 0        |
| K04099 | 0        | 1        | 0       | 0        | 0        | 0        | 0        | 0        | 0        | 0        | 0        | 0        | 0        | 0       | 0        | 0        | 0        | 0        | 0        |
| K04100 | 0        | 0        | 0       | 0        | 0        | 0        | 0        | 0        | 0        | 0        | 0        | 0        | 0        | 0       | 0        | 0        | 0        | 0        | 0        |
| K04102 | 0        | 0        | 0       | 0        | 0        | 0        | 0        | 0        | 0        | 0        | 0        | 0        | 0        | 0       | 0        | 0        | 0        | 0        | 0        |
| K04116 | 0        | 0        | 0       | 0        | 0        | 0        | 0        | 0        | 0        | 0        | 0        | 0        | 0        | 0       | 0        | 0        | 0        | 0        | 0        |
| K05394 | 0        | 1        | 1       | 1        | 0        | 0        | 0        | 0        | 1        | 1        | 0        | 0        | 2        | 0       | 0        | 1        | 0        | 0        | 1        |

| EC/KO  | DA-AD-28 | DA-AD-29 | DA-AD-3 | DA-AD-30 | DA-AD-31 | DA-AD-32 | DA-AD-33 | DA-AD-34 | DA-AD-35 | DA-AD-36 | DA-AD-37 | DA-AD-38 | DA-AD-39 | DA-AD-4 | DA-AD-40 | DA-AD-41 | DA-AD-42 | DA-AD-43 | DA-AD-44 |
|--------|----------|----------|---------|----------|----------|----------|----------|----------|----------|----------|----------|----------|----------|---------|----------|----------|----------|----------|----------|
| K05549 | 0        | 1        | 0       | 0        | 0        | 0        | 0        | 0        | 0        | 0        | 0        | 0        | 0        | 0       | 0        | 0        | 0        | 0        | 0        |
| K05783 | 0        | 0        | 0       | 0        | 0        | 0        | 0        | 0        | 0        | 0        | 0        | 0        | 0        | 0       | 0        | 0        | 0        | 0        | 0        |
| K05797 | 0        | 0        | 0       | 0        | 0        | 0        | 0        | 0        | 0        | 0        | 0        | 0        | 0        | 0       | 0        | 0        | 0        | 0        | 0        |
| K06281 | 0        | 2        | 1       | 0        | 1        | 0        | 0        | 1        | 0        | 1        | 1        | 1        | 0        | 0       | 0        | 1        | 1        | 0        | 1        |
| K06446 | 0        | 2        | 11      | 0        | 1        | 2        | 1        | 1        | 1        | 2        | 1        | 2        | 3        | 19      | 1        | 4        | 3        | 0        | 4        |
| K06912 | 0        | 0        | 0       | 0        | 0        | 0        | 0        | 0        | 0        | 0        | 0        | 0        | 0        | 0       | 0        | 0        | 0        | 0        | 0        |
| K07535 | 0        | 0        | 1       | 0        | 0        | 0        | 0        | 0        | 0        | 0        | 0        | 0        | 0        | 0       | 1        | 1        | 0        | 0        | 0        |
| K07536 | 0        | 3        | 1       | 3        | 1        | 1        | 1        | 2        | 3        | 1        | 2        | 0        | 1        | 1       | 0        | 0        | 2        | 2        | 4        |
| K08689 | 0        | 0        | 0       | 0        | 0        | 0        | 0        | 0        | 0        | 0        | 0        | 0        | 0        | 0       | 0        | 0        | 0        | 0        | 0        |
| K08710 | 0        | 0        | 0       | 0        | 0        | 0        | 0        | 0        | 0        | 0        | 0        | 0        | 0        | 0       | 0        | 0        | 0        | 0        | 0        |
| K09461 | 0        | 0        | 1       | 0        | 0        | 0        | 0        | 1        | 0        | 0        | 0        | 0        | 0        | 0       | 1        | 1        | 0        | 0        | 0        |
| K10217 | 0        | 0        | 0       | 0        | 0        | 0        | 0        | 0        | 0        | 0        | 0        | 0        | 0        | 0       | 0        | 0        | 0        | 0        | 0        |
| K10218 | 0        | 1        | 1       | 0        | 1        | 0        | 0        | 0        | 0        | 0        | 1        | 0        | 0        | 0       | 0        | 0        | 0        | 0        | 0        |
| K10220 | 0        | 0        | 0       | 0        | 0        | 0        | 0        | 0        | 0        | 0        | 0        | 0        | 0        | 0       | 0        | 0        | 0        | 0        | 0        |
| K11180 | 0        | 0        | 0       | 0        | 0        | 0        | 0        | 0        | 0        | 0        | 0        | 0        | 0        | 1       | 0        | 0        | 1        | 0        | 0        |
| K13953 | 0        | 0        | 0       | 0        | 0        | 0        | 0        | 0        | 0        | 0        | 0        | 0        | 1        | 0       | 0        | 0        | 0        | 0        | 0        |
| K14333 | 0        | 1        | 0       | 0        | 0        | 0        | 0        | 0        | 0        | 0        | 0        | 0        | 0        | 0       | 0        | 0        | 0        | 0        | 0        |
| K14519 | 0        | 0        | 0       | 0        | 0        | 0        | 0        | 0        | 0        | 0        | 0        | 0        | 0        | 0       | 0        | 0        | 0        | 0        | 0        |
| K15054 | 0        | 0        | 0       | 0        | 0        | 0        | 0        | 0        | 0        | 0        | 0        | 0        | 0        | 0       | 0        | 0        | 0        | 0        | 0        |
| K16173 | 0        | 1        | 0       | 0        | 0        | 0        | 0        | 0        | 0        | 0        | 0        | 0        | 1        | 0       | 0        | 0        | 0        | 0        | 0        |
| K16514 | 0        | 0        | 0       | 0        | 0        | 0        | 0        | 0        | 0        | 0        | 0        | 0        | 0        | 0       | 0        | 0        | 0        | 0        | 0        |
| K16874 | 0        | 0        | 1       | 0        | 0        | 0        | 0        | 0        | 0        | 0        | 0        | 0        | 0        | 0       | 0        | 0        | 0        | 0        | 0        |



| EC/KO      | DA-AD-45 | DA-AD-46 | DA-AD-47 | DA-AD-48 | DA-AD-49 | DA-AD-5 | DA-AD-50 | DA-AD-51 | DA-AD-52 | DA-AD-53 | DA-AD-54 | DA-AD-55 | DA-AD-56 | DA-AD-57 | DA-AD-58 | DA-AD-59 | DA-AD-6 | DA-AD-60 | DA-AD-61 |
|------------|----------|----------|----------|----------|----------|---------|----------|----------|----------|----------|----------|----------|----------|----------|----------|----------|---------|----------|----------|
| 1.1.1.-    | 35       | 26       | 19       | 27       | 46       | 8       | 46       | 35       | 39       | 58       | 52       | 52       | 48       | 71       | 71       | 44       | 44      | 35       | 62       |
| 1.1.1.1    | 27       | 18       | 15       | 14       | 40       | 9       | 24       | 20       | 33       | 33       | 33       | 32       | 20       | 30       | 37       | 35       | 28      | 24       | 42       |
| 1.1.1.157  | 0        | 0        | 1        | 0        | 2        | 0       | 0        | 1        | 1        | 2        | 1        | 0        | 0        | 0        | 0        | 2        | 1       | 1        | 1        |
| 1.1.1.205  | 16       | 7        | 9        | 11       | 23       | 5       | 10       | 12       | 21       | 24       | 25       | 25       | 14       | 30       | 24       | 21       | 14      | 13       | 22       |
| 1.1.1.35   | 3        | 1        | 3        | 0        | 3        | 0       | 1        | 2        | 5        | 5        | 5        | 3        | 1        | 2        | 6        | 4        | 3       | 3        | 3        |
| 1.12.99.6  | 0        | 0        | 0        | 0        | 0        | 0       | 0        | 0        | 1        | 2        | 0        | 0        | 3        | 3        | 1        | 2        | 1       | 1        | 1        |
| 1.13.11.-  | 0        | 0        | 0        | 0        | 0        | 0       | 0        | 0        | 0        | 0        | 0        | 0        | 0        | 0        | 0        | 0        | 0       | 0        | 0        |
| 1.13.11.1  | 0        | 0        | 0        | 0        | 0        | 0       | 0        | 0        | 0        | 0        | 0        | 0        | 0        | 0        | 0        | 0        | 0       | 0        | 0        |
| 1.13.11.2  | 0        | 0        | 0        | 0        | 0        | 0       | 0        | 0        | 0        | 0        | 0        | 0        | 0        | 0        | 0        | 0        | 0       | 0        | 0        |
| 1.13.11.3  | 0        | 0        | 0        | 0        | 0        | 0       | 0        | 0        | 0        | 0        | 0        | 0        | 0        | 0        | 0        | 0        | 0       | 0        | 0        |
| 1.13.11.39 | 0        | 0        | 0        | 0        | 0        | 0       | 0        | 0        | 0        | 0        | 0        | 0        | 0        | 0        | 0        | 0        | 0       | 0        | 0        |
| 1.13.11.5  | 0        | 0        | 0        | 0        | 0        | 0       | 0        | 0        | 0        | 0        | 0        | 0        | 0        | 0        | 0        | 0        | 0       | 0        | 0        |
| 1.13.11.8  | 0        | 0        | 0        | 0        | 0        | 0       | 0        | 0        | 0        | 0        | 0        | 0        | 0        | 0        | 0        | 0        | 0       | 0        | 0        |
| 1.14.12.10 | 0        | 0        | 0        | 0        | 0        | 0       | 0        | 1        | 0        | 0        | 0        | 0        | 0        | 0        | 0        | 0        | 0       | 0        | 0        |
| 1.14.12.13 | 0        | 0        | 0        | 0        | 0        | 0       | 0        | 0        | 0        | 0        | 0        | 0        | 0        | 0        | 0        | 0        | 0       | 0        | 0        |
| 1.14.12.18 | 0        | 0        | 0        | 0        | 0        | 0       | 0        | 0        | 0        | 0        | 0        | 0        | 0        | 0        | 0        | 0        | 0       | 0        | 0        |
| 1.14.13.-  | 0        | 0        | 0        | 0        | 0        | 0       | 0        | 0        | 0        | 0        | 0        | 0        | 0        | 0        | 0        | 0        | 0       | 0        | 0        |
| 1.14.13.1  | 0        | 0        | 0        | 0        | 0        | 0       | 0        | 0        | 0        | 0        | 0        | 0        | 0        | 0        | 0        | 0        | 0       | 0        | 0        |
| 1.14.13.2  | 0        | 0        | 0        | 0        | 0        | 0       | 0        | 0        | 0        | 0        | 0        | 0        | 0        | 0        | 0        | 0        | 0       | 0        | 0        |
| 1.14.13.50 | 0        | 0        | 0        | 0        | 0        | 0       | 0        | 0        | 0        | 0        | 0        | 0        | 0        | 0        | 0        | 0        | 0       | 0        | 0        |
| 1.14.13.7  | 0        | 2        | 0        | 0        | 1        | 0       | 0        | 0        | 1        | 0        | 0        | 1        | 0        | 1        | 2        | 0        | 0       | 0        | 0        |
| 1.14.13.8  | 0        | 0        | 0        | 0        | 0        | 0       | 0        | 0        | 0        | 0        | 0        | 0        | 0        | 0        | 0        | 0        | 0       | 0        | 0        |
| 1.14.13.82 | 0        | 0        | 0        | 0        | 0        | 0       | 0        | 0        | 0        | 0        | 0        | 0        | 0        | 0        | 0        | 0        | 0       | 0        | 0        |
| 1.14.99.-  | 0        | 0        | 0        | 0        | 0        | 0       | 0        | 0        | 0        | 0        | 0        | 0        | 0        | 0        | 0        | 0        | 0       | 0        | 0        |
| 1.17.99.1  | 0        | 0        | 0        | 0        | 0        | 0       | 0        | 0        | 0        | 0        | 0        | 0        | 0        | 0        | 0        | 0        | 0       | 0        | 0        |
| 1.18.6.1   | 1        | 0        | 0        | 0        | 0        | 0       | 0        | 0        | 0        | 1        | 0        | 0        | 0        | 0        | 0        | 0        | 0       | 0        | 0        |
| 1.2.1.-    | 0        | 0        | 0        | 0        | 0        | 0       | 0        | 0        | 0        | 0        | 0        | 0        | 0        | 0        | 0        | 0        | 0       | 0        | 0        |
| 1.2.1.10   | 2        | 3        | 2        | 2        | 3        | 0       | 3        | 2        | 6        | 7        | 8        | 4        | 4        | 3        | 6        | 8        | 7       | 4        | 3        |
| 1.2.1.3    | 3        | 4        | 2        | 4        | 4        | 2       | 2        | 3        | 7        | 6        | 8        | 5        | 8        | 8        | 13       | 4        | 5       | 8        | 9        |
| 1.2.1.39   | 0        | 0        | 0        | 0        | 0        | 0       | 0        | 0        | 0        | 0        | 0        | 0        | 0        | 0        | 0        | 0        | 0       | 0        | 0        |
| 1.2.7.1    | 9        | 3        | 6        | 8        | 14       | 1       | 6        | 8        | 15       | 13       | 14       | 14       | 11       | 15       | 13       | 9        | 14      | 7        | 14       |
| 1.2.99.2   | 0        | 3        | 1        | 2        | 1        | 0       | 3        | 2        | 2        | 7        | 5        | 6        | 1        | 4        | 5        | 2        | 4       | 2        | 5        |
| 1.3.1.-    | 0        | 0        | 0        | 0        | 0        | 0       | 1        | 0        | 0        | 0        | 0        | 0        | 1        | 0        | 0        | 0        | 0       | 0        | 0        |
| 1.3.1.2    | 0        | 0        | 1        | 0        | 1        | 0       | 1        | 1        | 2        | 2        | 2        | 1        | 1        | 0        | 1        | 0        | 2       | 0        | 1        |
| 1.3.1.25   | 0        | 0        | 0        | 0        | 0        | 0       | 0        | 0        | 0        | 0        | 0        | 0        | 0        | 0        | 0        | 0        | 0       | 0        | 0        |
| 1.3.99.-   | 0        | 0        | 0        | 0        | 0        | 0       | 0        | 0        | 0        | 2        | 0        | 0        | 0        | 0        | 0        | 0        | 0       | 0        | 0        |
| 1.6.5.-    | 55       | 29       | 25       | 24       | 66       | 8       | 28       | 46       | 36       | 44       | 64       | 51       | 45       | 48       | 53       | 52       | 42      | 33       | 43       |
| 1.7.1.-    | 11       | 4        | 4        | 6        | 10       | 3       | 10       | 13       | 8        | 7        | 11       | 10       | 10       | 11       | 11       | 8        | 4       | 6        | 7        |
| 1.8.99.3   | 0        | 0        | 0        | 0        | 0        | 0       | 0        | 0        | 1        | 0        | 1        | 0        | 0        | 0        | 0        | 0        | 1       | 0        | 0        |
| 2.1.1.-    | 223      | 118      | 166      | 123      | 341      | 51      | 168      | 206      | 280      | 325      | 318      | 268      | 188      | 335      | 374      | 295      | 276     | 211      | 307      |
| 2.3.1.-    | 138      | 85       | 101      | 74       | 171      | 27      | 122      | 116      | 129      | 168      | 184      | 168      | 133      | 219      | 221      | 141      | 143     | 152      | 144      |
| 2.3.1.16   | 0        | 0        | 1        | 0        | 1        | 1       | 0        | 0        | 1        | 1        | 1        | 2        | 0        | 1        | 1        | 4        | 2       | 1        | 2        |
| 2.3.1.5    | 0        | 0        | 0        | 0        | 0        | 0       | 0        | 0        | 0        | 0        | 0        | 0        | 0        | 0        | 0        | 0        | 0       | 0        | 0        |
| 2.3.1.9    | 0        | 0        | 0        | 0        | 0        | 1       | 0        | 0        | 0        | 1        | 0        | 0        | 0        | 1        | 0        | 0        | 1       | 0        | 1        |
| 2.4.2.10   | 12       | 8        | 12       | 6        | 14       | 3       | 9        | 13       | 20       | 14       | 21       | 20       | 15       | 17       | 19       | 18       | 15      | 7        | 16       |
| 2.4.2.3    | 4        | 6        | 11       | 3        | 15       | 2       | 5        | 6        | 7        | 10       | 16       | 12       | 4        | 10       | 16       | 10       | 9       | 11       | 12       |
| 2.4.2.4    | 2        | 5        | 3        | 1        | 10       | 0       | 3        | 3        | 10       | 6        | 5        | 2        | 1        | 8        | 7        | 6        | 5       | 2        | 4        |
| 2.4.2.8    | 17       | 5        | 12       | 8        | 14       | 6       | 11       | 9        | 15       | 16       | 17       | 16       | 6        | 22       | 20       | 16       | 10      | 13       | 14       |
| 2.5.1.-    | 30       | 13       | 11       | 14       | 24       | 4       | 14       | 18       | 27       | 21       | 28       | 29       | 23       | 28       | 36       | 21       | 17      | 14       | 27       |

| EC/KO    | DA-AD-45 | DA-AD-46 | DA-AD-47 | DA-AD-48 | DA-AD-49 | DA-AD-5 | DA-AD-50 | DA-AD-51 | DA-AD-52 | DA-AD-53 | DA-AD-54 | DA-AD-55 | DA-AD-56 | DA-AD-57 | DA-AD-58 | DA-AD-59 | DA-AD-6 | DA-AD-60 | DA-AD-61 |
|----------|----------|----------|----------|----------|----------|---------|----------|----------|----------|----------|----------|----------|----------|----------|----------|----------|---------|----------|----------|
| 2.5.1.18 | 0        | 0        | 0        | 1        | 2        | 0       | 1        | 0        | 1        | 0        | 0        | 0        | 2        | 0        | 1        | 1        | 0       | 1        | 6        |
| 2.6.1.-  | 37       | 9        | 23       | 19       | 34       | 11      | 26       | 25       | 41       | 43       | 42       | 31       | 33       | 35       | 53       | 41       | 27      | 25       | 32       |
| 2.7.1.21 | 10       | 4        | 10       | 3        | 10       | 1       | 5        | 6        | 8        | 9        | 10       | 16       | 7        | 10       | 9        | 7        | 4       | 5        | 10       |
| 2.7.1.48 | 30       | 18       | 16       | 11       | 42       | 3       | 17       | 23       | 27       | 34       | 47       | 37       | 28       | 43       | 44       | 39       | 26      | 16       | 26       |
| 2.7.4.-  | 14       | 11       | 13       | 10       | 22       | 2       | 11       | 14       | 18       | 19       | 15       | 15       | 15       | 23       | 20       | 20       | 19      | 11       | 17       |
| 2.8.3.-  | 2        | 0        | 1        | 1        | 2        | 1       | 1        | 0        | 0        | 2        | 1        | 2        | 2        | 3        | 2        | 1        | 1       | 0        | 0        |
| 2.8.3.1  | 0        | 0        | 0        | 0        | 0        | 0       | 0        | 0        | 1        | 0        | 0        | 0        | 0        | 0        | 0        | 0        | 0       | 0        | 0        |
| 2.8.3.12 | 1        | 0        | 0        | 1        | 0        | 0       | 0        | 0        | 0        | 0        | 1        | 0        | 2        | 1        | 0        | 0        | 1       | 0        | 0        |
| 2.8.3.6  | 0        | 0        | 0        | 0        | 1        | 0       | 0        | 0        | 0        | 0        | 0        | 1        | 0        | 0        | 1        | 1        | 0       | 0        | 0        |
| 2.8.3.8  | 1        | 0        | 1        | 0        | 3        | 0       | 0        | 2        | 2        | 1        | 1        | 4        | 0        | 1        | 0        | 2        | 2       | 0        | 4        |
| 3.1.1.-  | 6        | 4        | 3        | 2        | 5        | 1       | 3        | 4        | 2        | 5        | 4        | 3        | 1        | 10       | 9        | 4        | 6       | 7        | 4        |
| 3.1.1.1  | 9        | 3        | 2        | 4        | 9        | 0       | 5        | 0        | 3        | 6        | 10       | 3        | 5        | 12       | 5        | 7        | 7       | 2        | 6        |
| 3.1.1.17 | 1        | 0        | 1        | 2        | 1        | 0       | 3        | 1        | 0        | 0        | 1        | 3        | 2        | 4        | 2        | 2        | 1       | 0        | 0        |
| 3.1.1.2  | 0        | 0        | 0        | 0        | 0        | 0       | 0        | 0        | 0        | 0        | 1        | 0        | 0        | 0        | 1        | 0        | 0       | 0        | 0        |
| 3.1.1.24 | 0        | 0        | 2        | 1        | 3        | 2       | 4        | 3        | 2        | 3        | 3        | 2        | 2        | 5        | 7        | 2        | 4       | 4        | 2        |
| 3.1.1.45 | 0        | 0        | 0        | 0        | 0        | 0       | 0        | 0        | 0        | 0        | 0        | 0        | 0        | 0        | 0        | 0        | 0       | 0        | 0        |
| 3.1.2.-  | 0        | 0        | 0        | 0        | 0        | 0       | 0        | 0        | 0        | 0        | 0        | 0        | 0        | 0        | 0        | 0        | 0       | 0        | 0        |
| 3.1.2.23 | 4        | 1        | 4        | 2        | 7        | 1       | 5        | 9        | 2        | 4        | 7        | 9        | 4        | 6        | 7        | 6        | 5       | 5        | 5        |
| 3.1.3.1  | 21       | 8        | 13       | 12       | 19       | 2       | 14       | 11       | 3        | 13       | 20       | 16       | 22       | 22       | 17       | 9        | 9       | 11       | 9        |
| 3.1.3.2  | 5        | 2        | 3        | 4        | 5        | 0       | 3        | 7        | 2        | 1        | 7        | 3        | 7        | 6        | 3        | 4        | 3       | 1        | 4        |
| 3.1.3.41 | 0        | 0        | 0        | 0        | 0        | 0       | 0        | 0        | 0        | 0        | 0        | 0        | 0        | 0        | 0        | 0        | 0       | 0        | 0        |
| 3.2.1.31 | 10       | 1        | 1        | 3        | 5        | 0       | 1        | 2        | 3        | 9        | 3        | 7        | 5        | 5        | 4        | 5        | 2       | 2        | 2        |
| 3.3.2.9  | 0        | 0        | 0        | 0        | 0        | 0       | 0        | 0        | 0        | 0        | 0        | 0        | 0        | 0        | 0        | 0        | 0       | 0        | 0        |
| 3.5.1.-  | 24       | 16       | 16       | 15       | 39       | 6       | 21       | 33       | 26       | 25       | 40       | 29       | 17       | 31       | 41       | 37       | 26      | 22       | 24       |
| 3.5.1.4  | 1        | 2        | 1        | 1        | 5        | 1       | 1        | 1        | 3        | 1        | 3        | 4        | 3        | 3        | 2        | 2        | 3       | 3        | 1        |
| 3.5.1.5  | 0        | 0        | 0        | 0        | 1        | 0       | 0        | 0        | 1        | 0        | 0        | 1        | 0        | 2        | 0        | 2        | 2       | 1        | 2        |
| 3.5.1.54 | 1        | 1        | 2        | 0        | 6        | 0       | 2        | 1        | 2        | 3        | 4        | 3        | 3        | 7        | 4        | 3        | 3       | 1        | 4        |
| 3.5.1.6  | 0        | 0        | 1        | 0        | 1        | 1       | 1        | 0        | 1        | 1        | 2        | 2        | 1        | 2        | 3        | 3        | 2       | 0        | 2        |
| 3.5.2.-  | 0        | 0        | 0        | 0        | 0        | 0       | 0        | 0        | 0        | 0        | 0        | 0        | 0        | 0        | 0        | 0        | 0       | 0        | 0        |
| 3.5.2.2  | 1        | 0        | 0        | 0        | 2        | 0       | 1        | 1        | 0        | 2        | 2        | 1        | 1        | 2        | 1        | 2        | 2       | 2        | 2        |
| 3.5.4.-  | 26       | 21       | 16       | 9        | 38       | 6       | 14       | 31       | 28       | 25       | 32       | 26       | 19       | 31       | 42       | 30       | 29      | 17       | 27       |
| 3.5.4.5  | 15       | 10       | 7        | 5        | 15       | 1       | 12       | 14       | 18       | 15       | 17       | 12       | 9        | 19       | 19       | 14       | 15      | 8        | 11       |
| 3.5.5.1  | 1        | 1        | 1        | 1        | 2        | 0       | 0        | 1        | 3        | 2        | 1        | 2        | 2        | 1        | 5        | 1        | 1       | 2        | 0        |
| 3.5.5.7  | 0        | 0        | 0        | 0        | 0        | 0       | 0        | 0        | 1        | 0        | 0        | 0        | 0        | 0        | 0        | 0        | 0       | 0        | 0        |
| 3.5.99.3 | 0        | 0        | 0        | 0        | 0        | 0       | 0        | 0        | 0        | 1        | 0        | 0        | 0        | 0        | 0        | 0        | 0       | 0        | 0        |
| 3.6.1.7  | 2        | 2        | 1        | 2        | 4        | 0       | 4        | 0        | 4        | 2        | 5        | 7        | 2        | 3        | 5        | 6        | 5       | 4        | 6        |
| 3.7.1.-  | 0        | 2        | 1        | 0        | 3        | 0       | 0        | 0        | 4        | 1        | 2        | 0        | 0        | 0        | 1        | 3        | 2       | 0        | 4        |
| 3.7.1.2  | 3        | 5        | 3        | 1        | 4        | 0       | 3        | 2        | 0        | 3        | 3        | 6        | 6        | 6        | 12       | 3        | 4       | 4        | 8        |
| 3.8.1.2  | 5        | 3        | 6        | 4        | 6        | 1       | 5        | 2        | 2        | 6        | 7        | 6        | 8        | 4        | 10       | 5        | 2       | 3        | 4        |
| 3.8.1.3  | 0        | 0        | 0        | 0        | 0        | 0       | 0        | 0        | 0        | 0        | 0        | 0        | 0        | 0        | 0        | 0        | 0       | 0        | 0        |
| 3.8.1.5  | 0        | 0        | 3        | 0        | 0        | 0       | 1        | 0        | 0        | 1        | 0        | 0        | 1        | 0        | 0        | 0        | 1       | 0        | 0        |
| 4.1.1.-  | 11       | 4        | 5        | 4        | 13       | 2       | 5        | 6        | 7        | 11       | 21       | 11       | 5        | 15       | 11       | 9        | 10      | 6        | 13       |
| 4.1.1.44 | 24       | 24       | 20       | 14       | 33       | 4       | 23       | 17       | 19       | 23       | 32       | 26       | 20       | 32       | 39       | 22       | 29      | 16       | 15       |
| 4.1.1.55 | 0        | 0        | 0        | 0        | 0        | 0       | 0        | 0        | 0        | 0        | 0        | 0        | 0        | 0        | 0        | 0        | 1       | 0        | 0        |
| 4.1.1.7  | 0        | 0        | 0        | 0        | 0        | 0       | 0        | 0        | 0        | 0        | 0        | 0        | 0        | 0        | 0        | 0        | 0       | 0        | 0        |
| 4.1.1.70 | 0        | 0        | 0        | 0        | 0        | 0       | 0        | 0        | 0        | 0        | 0        | 0        | 1        | 0        | 0        | 0        | 0       | 1        | 0        |
| 4.1.1.77 | 0        | 0        | 0        | 0        | 0        | 0       | 0        | 0        | 0        | 0        | 0        | 0        | 0        | 0        | 0        | 0        | 0       | 0        | 0        |
| 4.1.2.-  | 3        | 2        | 5        | 0        | 4        | 3       | 4        | 5        | 9        | 9        | 5        | 6        | 4        | 8        | 7        | 7        | 7       | 2        | 6        |
| 4.1.3.-  | 23       | 5        | 10       | 12       | 27       | 5       | 14       | 16       | 20       | 21       | 27       | 15       | 12       | 29       | 27       | 21       | 17      | 14       | 21       |

| EC/KO    | DA-AD-45 | DA-AD-46 | DA-AD-47 | DA-AD-48 | DA-AD-49 | DA-AD-5 | DA-AD-50 | DA-AD-51 | DA-AD-52 | DA-AD-53 | DA-AD-54 | DA-AD-55 | DA-AD-56 | DA-AD-57 | DA-AD-58 | DA-AD-59 | DA-AD-6 | DA-AD-60 | DA-AD-61 |
|----------|----------|----------|----------|----------|----------|---------|----------|----------|----------|----------|----------|----------|----------|----------|----------|----------|---------|----------|----------|
| 4.1.3.39 | 0        | 0        | 0        | 1        | 1        | 0       | 0        | 0        | 0        | 0        | 0        | 0        | 1        | 2        | 0        | 1        | 0       | 0        | 0        |
| 4.1.99.- | 1        | 1        | 2        | 1        | 1        | 1       | 1        | 2        | 2        | 3        | 4        | 0        | 1        | 5        | 5        | 1        | 3       | 1        | 1        |
| 4.2.1.-  | 47       | 22       | 28       | 21       | 50       | 6       | 33       | 42       | 44       | 46       | 51       | 48       | 40       | 61       | 74       | 48       | 41      | 39       | 54       |
| 4.2.1.17 | 5        | 1        | 4        | 4        | 7        | 1       | 4        | 3        | 4        | 5        | 6        | 8        | 6        | 8        | 7        | 2        | 3       | 4        | 6        |
| 4.2.1.80 | 0        | 0        | 0        | 0        | 0        | 0       | 0        | 0        | 0        | 0        | 0        | 0        | 0        | 0        | 0        | 0        | 0       | 0        | 0        |
| 4.2.1.83 | 1        | 0        | 0        | 2        | 1        | 0       | 1        | 0        | 1        | 0        | 0        | 0        | 0        | 2        | 2        | 1        | 0       | 0        | 0        |
| 4.2.1.84 | 0        | 0        | 0        | 0        | 0        | 0       | 0        | 0        | 0        | 0        | 1        | 0        | 0        | 1        | 0        | 0        | 0       | 0        | 0        |
| 5.1.2.2  | 0        | 0        | 0        | 0        | 0        | 0       | 0        | 0        | 0        | 1        | 0        | 0        | 0        | 0        | 0        | 0        | 0       | 0        | 0        |
| 5.2.1.2  | 0        | 0        | 0        | 0        | 0        | 0       | 0        | 0        | 0        | 0        | 0        | 0        | 0        | 0        | 0        | 0        | 0       | 0        | 0        |
| 5.3.3.4  | 0        | 0        | 0        | 0        | 0        | 0       | 0        | 0        | 0        | 0        | 0        | 0        | 0        | 0        | 0        | 0        | 0       | 0        | 0        |
| 5.3.99.- | 3        | 1        | 1        | 1        | 5        | 0       | 1        | 1        | 6        | 4        | 3        | 2        | 3        | 4        | 5        | 0        | 0       | 0        | 7        |
| 5.4.99.- | 2        | 1        | 0        | 1        | 0        | 1       | 0        | 1        | 0        | 0        | 1        | 2        | 0        | 1        | 0        | 1        | 1       | 0        | 1        |
| 5.5.1.1  | 2        | 0        | 2        | 2        | 3        | 0       | 2        | 1        | 3        | 3        | 1        | 2        | 3        | 3        | 4        | 4        | 1       | 3        | 2        |
| 5.5.1.2  | 0        | 0        | 0        | 0        | 0        | 0       | 0        | 0        | 0        | 0        | 0        | 0        | 0        | 0        | 0        | 0        | 0       | 0        | 0        |
| 6.2.1.-  | 0        | 0        | 0        | 0        | 0        | 0       | 0        | 0        | 0        | 0        | 0        | 0        | 0        | 0        | 0        | 0        | 0       | 0        | 0        |
| 6.3.5.2  | 20       | 3        | 9        | 11       | 18       | 3       | 13       | 10       | 10       | 20       | 15       | 17       | 21       | 22       | 25       | 21       | 14      | 16       | 17       |
| K00002   | 0        | 2        | 0        | 1        | 0        | 0       | 1        | 2        | 2        | 2        | 1        | 1        | 2        | 1        | 1        | 2        | 0       | 4        | 1        |
| K00055   | 0        | 0        | 0        | 0        | 0        | 0       | 0        | 0        | 0        | 0        | 0        | 1        | 0        | 0        | 0        | 0        | 0       | 0        | 0        |
| K00074   | 3        | 2        | 4        | 1        | 5        | 0       | 1        | 3        | 6        | 8        | 9        | 3        | 5        | 3        | 6        | 8        | 3       | 7        | 3        |
| K00088   | 13       | 4        | 6        | 9        | 20       | 3       | 7        | 7        | 20       | 24       | 16       | 17       | 11       | 15       | 21       | 17       | 17      | 14       | 15       |
| K00100   | 51       | 27       | 18       | 15       | 58       | 9       | 25       | 36       | 45       | 63       | 54       | 51       | 46       | 59       | 65       | 48       | 41      | 32       | 67       |
| K00128   | 1        | 1        | 0        | 1        | 0        | 0       | 1        | 1        | 3        | 3        | 2        | 0        | 2        | 1        | 4        | 0        | 0       | 2        | 4        |
| K00129   | 0        | 0        | 0        | 0        | 0        | 0       | 0        | 0        | 0        | 0        | 0        | 0        | 0        | 0        | 0        | 0        | 0       | 0        | 0        |
| K00132   | 0        | 1        | 1        | 0        | 0        | 0       | 0        | 0        | 0        | 1        | 0        | 1        | 0        | 0        | 1        | 1        | 1       | 0        | 0        |
| K00141   | 0        | 0        | 0        | 0        | 0        | 0       | 0        | 0        | 0        | 0        | 0        | 0        | 0        | 0        | 0        | 0        | 0       | 0        | 0        |
| K00146   | 0        | 0        | 0        | 0        | 0        | 0       | 0        | 0        | 0        | 0        | 0        | 0        | 0        | 0        | 0        | 0        | 0       | 0        | 0        |
| K00148   | 0        | 0        | 0        | 0        | 0        | 0       | 0        | 0        | 0        | 0        | 0        | 0        | 0        | 0        | 0        | 0        | 0       | 0        | 0        |
| K00155   | 0        | 0        | 0        | 0        | 0        | 0       | 0        | 0        | 0        | 1        | 1        | 0        | 0        | 1        | 0        | 0        | 0       | 0        | 0        |
| K00169   | 1        | 1        | 1        | 0        | 4        | 0       | 0        | 0        | 3        | 0        | 5        | 0        | 2        | 6        | 3        | 2        | 2       | 1        | 4        |
| K00224   | 0        | 0        | 0        | 0        | 1        | 0       | 0        | 0        | 0        | 1        | 1        | 0        | 1        | 1        | 1        | 2        | 1       | 0        | 1        |
| K00274   | 0        | 0        | 0        | 0        | 0        | 0       | 0        | 0        | 0        | 0        | 0        | 0        | 0        | 0        | 0        | 0        | 0       | 0        | 0        |
| K00446   | 0        | 0        | 0        | 0        | 0        | 0       | 0        | 0        | 0        | 0        | 0        | 0        | 0        | 0        | 0        | 0        | 0       | 0        | 0        |
| K00448   | 0        | 0        | 0        | 0        | 0        | 0       | 0        | 0        | 0        | 0        | 0        | 0        | 0        | 0        | 0        | 0        | 0       | 0        | 0        |
| K00462   | 0        | 0        | 0        | 1        | 1        | 0       | 1        | 0        | 0        | 0        | 1        | 0        | 2        | 1        | 1        | 1        | 0       | 2        | 1        |
| K00480   | 0        | 0        | 0        | 0        | 0        | 0       | 0        | 0        | 0        | 0        | 0        | 0        | 0        | 0        | 0        | 0        | 0       | 0        | 0        |
| K00481   | 0        | 0        | 0        | 0        | 0        | 0       | 0        | 0        | 0        | 0        | 0        | 0        | 0        | 0        | 0        | 0        | 0       | 0        | 0        |
| K00539   | 0        | 1        | 0        | 0        | 0        | 0       | 0        | 1        | 0        | 1        | 0        | 0        | 1        | 2        | 3        | 0        | 3       | 1        | 1        |
| K00599   | 40       | 15       | 27       | 22       | 46       | 16      | 24       | 34       | 33       | 40       | 65       | 42       | 30       | 66       | 65       | 32       | 32      | 32       | 58       |
| K00626   | 0        | 0        | 2        | 0        | 4        | 1       | 0        | 1        | 2        | 3        | 2        | 4        | 3        | 2        | 1        | 4        | 4       | 1        | 3        |
| K00632   | 0        | 0        | 0        | 0        | 0        | 0       | 0        | 0        | 0        | 0        | 0        | 0        | 0        | 0        | 0        | 0        | 0       | 0        | 0        |
| K00680   | 35       | 33       | 28       | 17       | 46       | 10      | 31       | 26       | 34       | 51       | 58       | 51       | 31       | 50       | 64       | 39       | 37      | 37       | 43       |
| K00757   | 12       | 4        | 6        | 7        | 15       | 3       | 2        | 11       | 8        | 11       | 15       | 12       | 14       | 9        | 18       | 9        | 8       | 8        | 12       |
| K00758   | 1        | 1        | 3        | 1        | 5        | 0       | 1        | 4        | 5        | 2        | 7        | 0        | 0        | 5        | 5        | 7        | 4       | 6        | 3        |
| K00760   | 23       | 10       | 19       | 11       | 28       | 6       | 20       | 23       | 25       | 32       | 24       | 23       | 16       | 31       | 29       | 25       | 22      | 22       | 22       |
| K00799   | 0        | 0        | 0        | 0        | 2        | 0       | 0        | 1        | 0        | 0        | 0        | 0        | 0        | 1        | 1        | 0        | 2       | 0        | 0        |
| K00857   | 12       | 6        | 11       | 3        | 21       | 2       | 7        | 10       | 16       | 17       | 13       | 17       | 11       | 18       | 14       | 12       | 9       | 11       | 13       |
| K00876   | 28       | 16       | 17       | 13       | 42       | 6       | 13       | 23       | 28       | 30       | 40       | 32       | 25       | 32       | 39       | 39       | 23      | 15       | 20       |
| K01026   | 1        | 0        | 0        | 0        | 1        | 0       | 0        | 0        | 1        | 2        | 1        | 2        | 0        | 0        | 0        | 0        | 1       | 0        | 1        |
| K01031   | 0        | 0        | 0        | 0        | 0        | 0       | 0        | 0        | 0        | 0        | 0        | 0        | 0        | 0        | 0        | 0        | 0       | 0        | 0        |

| EC/KO  | DA-AD-45 | DA-AD-46 | DA-AD-47 | DA-AD-48 | DA-AD-49 | DA-AD-5 | DA-AD-50 | DA-AD-51 | DA-AD-52 | DA-AD-53 | DA-AD-54 | DA-AD-55 | DA-AD-56 | DA-AD-57 | DA-AD-58 | DA-AD-59 | DA-AD-6 | DA-AD-60 | DA-AD-61 |
|--------|----------|----------|----------|----------|----------|---------|----------|----------|----------|----------|----------|----------|----------|----------|----------|----------|---------|----------|----------|
| K01034 | 1        | 1        | 2        | 0        | 2        | 0       | 0        | 1        | 2        | 0        | 3        | 2        | 1        | 1        | 0        | 1        | 1       | 2        | 0        |
| K01039 | 0        | 0        | 0        | 0        | 0        | 0       | 0        | 0        | 0        | 0        | 0        | 1        | 0        | 0        | 0        | 0        | 1       | 0        | 0        |
| K01041 | 8        | 0        | 0        | 4        | 4        | 1       | 3        | 5        | 3        | 5        | 5        | 8        | 5        | 6        | 2        | 2        | 4       | 1        | 3        |
| K01053 | 0        | 0        | 0        | 0        | 0        | 0       | 0        | 0        | 0        | 0        | 0        | 0        | 0        | 0        | 0        | 0        | 0       | 0        | 0        |
| K01055 | 0        | 0        | 0        | 0        | 0        | 0       | 0        | 0        | 0        | 0        | 0        | 0        | 0        | 0        | 0        | 0        | 0       | 0        | 0        |
| K01061 | 0        | 0        | 0        | 0        | 0        | 0       | 0        | 0        | 0        | 0        | 0        | 0        | 0        | 0        | 0        | 0        | 0       | 0        | 0        |
| K01066 | 8        | 4        | 3        | 2        | 12       | 0       | 4        | 2        | 2        | 8        | 9        | 3        | 4        | 10       | 4        | 7        | 6       | 4        | 7        |
| K01075 | 0        | 2        | 0        | 0        | 1        | 0       | 0        | 1        | 1        | 2        | 1        | 1        | 2        | 1        | 1        | 2        | 2       | 1        | 1        |
| K01077 | 9        | 3        | 4        | 4        | 8        | 0       | 11       | 3        | 0        | 10       | 8        | 6        | 9        | 10       | 8        | 6        | 7       | 6        | 5        |
| K01101 | 5        | 1        | 1        | 2        | 9        | 0       | 3        | 3        | 6        | 9        | 0        | 5        | 3        | 5        | 7        | 9        | 2       | 4        | 6        |
| K01195 | 11       | 1        | 3        | 4        | 7        | 0       | 9        | 5        | 7        | 17       | 13       | 6        | 7        | 12       | 8        | 5        | 3       | 6        | 12       |
| K01426 | 0        | 0        | 1        | 0        | 0        | 0       | 0        | 0        | 0        | 1        | 0        | 0        | 0        | 1        | 0        | 0        | 0       | 0        | 2        |
| K01428 | 0        | 0        | 0        | 0        | 0        | 0       | 0        | 0        | 0        | 1        | 0        | 0        | 0        | 1        | 1        | 0        | 0       | 2        | 1        |
| K01457 | 0        | 0        | 0        | 0        | 0        | 0       | 0        | 0        | 0        | 0        | 0        | 0        | 0        | 0        | 0        | 0        | 0       | 0        | 0        |
| K01464 | 0        | 1        | 0        | 0        | 3        | 0       | 0        | 0        | 0        | 2        | 3        | 0        | 2        | 3        | 1        | 2        | 2       | 4        | 3        |
| K01489 | 20       | 14       | 11       | 7        | 25       | 2       | 15       | 19       | 26       | 21       | 24       | 17       | 17       | 27       | 23       | 25       | 21      | 12       | 15       |
| K01500 | 0        | 1        | 0        | 0        | 1        | 0       | 0        | 0        | 0        | 0        | 0        | 0        | 0        | 0        | 0        | 0        | 1       | 0        | 0        |
| K01501 | 1        | 0        | 2        | 1        | 4        | 0       | 0        | 2        | 6        | 4        | 2        | 1        | 3        | 2        | 4        | 2        | 1       | 3        | 2        |
| K01502 | 0        | 0        | 0        | 0        | 0        | 0       | 0        | 0        | 1        | 0        | 0        | 0        | 0        | 0        | 0        | 0        | 0       | 0        | 0        |
| K01512 | 4        | 3        | 5        | 5        | 8        | 2       | 4        | 5        | 6        | 5        | 8        | 8        | 5        | 11       | 8        | 7        | 9       | 7        | 12       |
| K01560 | 3        | 1        | 4        | 0        | 8        | 1       | 1        | 3        | 10       | 8        | 7        | 3        | 5        | 4        | 2        | 7        | 4       | 6        | 3        |
| K01561 | 0        | 0        | 0        | 0        | 1        | 0       | 0        | 0        | 0        | 0        | 0        | 0        | 1        | 0        | 1        | 0        | 0       | 0        | 0        |
| K01563 | 0        | 0        | 0        | 0        | 0        | 0       | 0        | 0        | 0        | 0        | 0        | 0        | 0        | 0        | 0        | 0        | 0       | 0        | 0        |
| K01564 | 1        | 0        | 1        | 0        | 2        | 0       | 1        | 0        | 0        | 0        | 0        | 1        | 3        | 1        | 1        | 1        | 2       | 0        | 0        |
| K01607 | 11       | 12       | 12       | 8        | 15       | 3       | 10       | 8        | 5        | 16       | 14       | 14       | 9        | 15       | 13       | 10       | 11      | 6        | 9        |
| K01612 | 0        | 0        | 0        | 0        | 0        | 0       | 0        | 0        | 0        | 0        | 0        | 0        | 0        | 0        | 0        | 0        | 0       | 0        | 0        |
| K01615 | 11       | 4        | 4        | 7        | 22       | 1       | 6        | 8        | 20       | 13       | 16       | 9        | 18       | 12       | 12       | 18       | 11      | 17       | 13       |
| K01617 | 0        | 0        | 0        | 0        | 0        | 0       | 0        | 0        | 0        | 0        | 0        | 0        | 0        | 0        | 0        | 0        | 0       | 0        | 0        |
| K01666 | 5        | 0        | 4        | 3        | 8        | 1       | 4        | 5        | 8        | 4        | 6        | 3        | 4        | 13       | 8        | 6        | 10      | 6        | 4        |
| K01692 | 0        | 0        | 1        | 0        | 0        | 0       | 0        | 1        | 1        | 0        | 0        | 0        | 1        | 1        | 0        | 0        | 1       | 1        | 0        |
| K01721 | 0        | 0        | 0        | 0        | 0        | 0       | 0        | 0        | 0        | 0        | 0        | 0        | 0        | 0        | 0        | 0        | 0       | 0        | 0        |
| K01726 | 9        | 1        | 3        | 1        | 12       | 0       | 3        | 4        | 5        | 3        | 12       | 4        | 8        | 6        | 4        | 4        | 1       | 7        | 3        |
| K01781 | 0        | 0        | 1        | 0        | 0        | 0       | 0        | 0        | 0        | 2        | 1        | 0        | 0        | 1        | 1        | 0        | 0       | 0        | 0        |
| K01821 | 2        | 0        | 0        | 0        | 2        | 0       | 3        | 0        | 2        | 1        | 1        | 2        | 2        | 2        | 3        | 2        | 3       | 0        | 0        |
| K01856 | 0        | 0        | 0        | 0        | 0        | 0       | 0        | 0        | 0        | 0        | 0        | 0        | 0        | 0        | 0        | 0        | 0       | 0        | 0        |
| K01857 | 0        | 0        | 0        | 0        | 0        | 0       | 0        | 0        | 0        | 1        | 0        | 0        | 0        | 1        | 0        | 0        | 0       | 0        | 1        |
| K01913 | 1        | 0        | 2        | 0        | 0        | 0       | 1        | 1        | 1        | 0        | 0        | 1        | 0        | 0        | 1        | 0        | 0       | 0        | 0        |
| K01951 | 15       | 4        | 7        | 7        | 19       | 3       | 5        | 9        | 8        | 16       | 14       | 9        | 13       | 12       | 12       | 18       | 11      | 11       | 14       |
| K02554 | 0        | 0        | 0        | 0        | 0        | 0       | 0        | 0        | 0        | 0        | 0        | 0        | 0        | 0        | 0        | 0        | 0       | 0        | 0        |
| K03381 | 0        | 0        | 0        | 0        | 0        | 0       | 0        | 0        | 0        | 0        | 0        | 0        | 0        | 0        | 0        | 0        | 0       | 0        | 0        |
| K03382 | 0        | 0        | 0        | 0        | 1        | 0       | 0        | 0        | 1        | 1        | 0        | 1        | 0        | 2        | 1        | 2        | 0       | 2        | 0        |
| K03464 | 0        | 0        | 0        | 0        | 0        | 0       | 0        | 0        | 0        | 0        | 0        | 0        | 0        | 0        | 0        | 0        | 0       | 0        | 0        |
| K03518 | 6        | 4        | 1        | 5        | 9        | 1       | 3        | 4        | 8        | 14       | 7        | 11       | 9        | 9        | 12       | 8        | 8       | 11       | 11       |
| K03862 | 0        | 0        | 0        | 0        | 0        | 0       | 0        | 0        | 0        | 0        | 0        | 0        | 0        | 0        | 0        | 0        | 0       | 0        | 0        |
| K04099 | 0        | 0        | 0        | 0        | 0        | 0       | 0        | 0        | 0        | 0        | 0        | 0        | 0        | 0        | 0        | 0        | 0       | 0        | 0        |
| K04100 | 0        | 0        | 0        | 0        | 0        | 0       | 0        | 0        | 0        | 0        | 0        | 0        | 0        | 0        | 0        | 0        | 0       | 0        | 0        |
| K04102 | 0        | 0        | 0        | 0        | 0        | 0       | 0        | 0        | 0        | 0        | 0        | 1        | 0        | 0        | 0        | 0        | 1       | 0        | 0        |
| K04116 | 0        | 0        | 0        | 0        | 0        | 0       | 0        | 0        | 0        | 0        | 0        | 0        | 0        | 0        | 0        | 0        | 0       | 0        | 0        |
| K05394 | 0        | 0        | 1        | 0        | 1        | 0       | 1        | 0        | 0        | 2        | 1        | 1        | 1        | 1        | 0        | 1        | 2       | 1        | 1        |

| EC/KO  | DA-AD-45 | DA-AD-46 | DA-AD-47 | DA-AD-48 | DA-AD-49 | DA-AD-5 | DA-AD-50 | DA-AD-51 | DA-AD-52 | DA-AD-53 | DA-AD-54 | DA-AD-55 | DA-AD-56 | DA-AD-57 | DA-AD-58 | DA-AD-59 | DA-AD-6 | DA-AD-60 | DA-AD-61 |
|--------|----------|----------|----------|----------|----------|---------|----------|----------|----------|----------|----------|----------|----------|----------|----------|----------|---------|----------|----------|
| K05549 | 0        | 0        | 0        | 0        | 0        | 0       | 0        | 0        | 0        | 0        | 0        | 0        | 0        | 0        | 0        | 0        | 0       | 0        | 0        |
| K05783 | 0        | 0        | 0        | 0        | 0        | 0       | 0        | 0        | 0        | 0        | 0        | 0        | 0        | 0        | 0        | 0        | 0       | 0        | 0        |
| K05797 | 0        | 0        | 0        | 0        | 0        | 0       | 0        | 0        | 0        | 0        | 0        | 0        | 0        | 0        | 0        | 0        | 0       | 0        | 0        |
| K06281 | 0        | 0        | 0        | 1        | 0        | 0       | 0        | 0        | 1        | 2        | 0        | 0        | 1        | 2        | 1        | 2        | 1       | 1        | 1        |
| K06446 | 3        | 0        | 1        | 2        | 8        | 3       | 2        | 0        | 5        | 9        | 3        | 6        | 2        | 1        | 5        | 3        | 4       | 2        | 1        |
| K06912 | 0        | 0        | 0        | 0        | 0        | 0       | 0        | 0        | 0        | 0        | 0        | 0        | 0        | 0        | 0        | 0        | 0       | 0        | 0        |
| K07535 | 0        | 0        | 0        | 0        | 0        | 0       | 0        | 0        | 0        | 1        | 0        | 0        | 0        | 0        | 0        | 0        | 0       | 0        | 0        |
| K07536 | 3        | 2        | 2        | 1        | 4        | 1       | 0        | 1        | 2        | 1        | 0        | 4        | 3        | 3        | 0        | 2        | 2       | 0        | 0        |
| K08689 | 0        | 0        | 0        | 0        | 0        | 0       | 0        | 0        | 0        | 0        | 0        | 0        | 0        | 0        | 0        | 0        | 0       | 0        | 0        |
| K08710 | 0        | 0        | 0        | 0        | 0        | 0       | 0        | 0        | 0        | 0        | 0        | 0        | 0        | 0        | 0        | 1        | 0       | 0        | 0        |
| K09461 | 0        | 0        | 0        | 0        | 0        | 0       | 0        | 0        | 0        | 0        | 0        | 0        | 0        | 1        | 0        | 0        | 0       | 0        | 0        |
| K10217 | 0        | 0        | 0        | 0        | 0        | 0       | 0        | 0        | 0        | 0        | 0        | 0        | 0        | 0        | 0        | 0        | 0       | 0        | 0        |
| K10218 | 0        | 0        | 0        | 0        | 0        | 0       | 0        | 0        | 0        | 1        | 1        | 1        | 0        | 1        | 0        | 0        | 0       | 0        | 1        |
| K10220 | 0        | 0        | 0        | 0        | 0        | 0       | 0        | 0        | 0        | 0        | 0        | 0        | 0        | 0        | 0        | 0        | 0       | 0        | 0        |
| K11180 | 0        | 0        | 0        | 0        | 0        | 0       | 0        | 0        | 0        | 0        | 1        | 0        | 0        | 1        | 0        | 0        | 0       | 0        | 0        |
| K13953 | 0        | 0        | 0        | 0        | 0        | 0       | 0        | 0        | 0        | 0        | 0        | 0        | 0        | 1        | 0        | 0        | 0       | 0        | 0        |
| K14333 | 0        | 0        | 0        | 0        | 0        | 0       | 0        | 0        | 0        | 0        | 0        | 0        | 0        | 0        | 0        | 0        | 0       | 0        | 0        |
| K14519 | 0        | 0        | 0        | 0        | 0        | 0       | 0        | 0        | 0        | 0        | 0        | 0        | 0        | 0        | 0        | 0        | 0       | 0        | 0        |
| K15054 | 0        | 0        | 0        | 0        | 0        | 0       | 0        | 0        | 0        | 0        | 0        | 0        | 0        | 0        | 0        | 0        | 0       | 0        | 0        |
| K16173 | 1        | 0        | 0        | 0        | 0        | 0       | 0        | 1        | 1        | 2        | 0        | 1        | 0        | 0        | 0        | 0        | 0       | 0        | 1        |
| K16514 | 0        | 0        | 0        | 0        | 0        | 0       | 0        | 0        | 0        | 0        | 0        | 1        | 0        | 0        | 0        | 0        | 0       | 0        | 0        |
| K16874 | 0        | 0        | 0        | 0        | 0        | 0       | 0        | 0        | 1        | 0        | 0        | 0        | 0        | 0        | 0        | 0        | 0       | 0        | 0        |

| EC/KO       | DA-AD-62 | DA-AD-63 | DA-AD-64 | DA-AD-65 | DA-AD-66 | DA-AD-67 | DA-AD-68 | DA-AD-69 | DA-AD-7 | DA-AD-70 | DA-AD-71 | DA-AD-72 | DA-AD-73 | DA-AD-74 | DA-AD-75 | DA-AD-76 | DA-AD-77 | DA-AD-78 | DA-AD-79 |
|-------------|----------|----------|----------|----------|----------|----------|----------|----------|---------|----------|----------|----------|----------|----------|----------|----------|----------|----------|----------|
| 1.1.1.-     | 28       | 53       | 50       | 47       | 53       | 63       | 60       | 52       | 84      | 69       | 39       | 66       | 67       | 49       | 43       | 54       | 9        | 29       | 55       |
| 1.1.1.1     | 32       | 32       | 33       | 42       | 31       | 37       | 38       | 54       | 47      | 36       | 20       | 35       | 55       | 38       | 26       | 37       | 6        | 22       | 40       |
| 1.1.1.157   | 1        | 0        | 1        | 0        | 2        | 1        | 1        | 0        | 2       | 1        | 0        | 0        | 3        | 0        | 0        | 0        | 0        | 1        | 1        |
| 1.1.1.205   | 16       | 18       | 21       | 12       | 22       | 20       | 27       | 22       | 28      | 16       | 11       | 20       | 24       | 31       | 13       | 19       | 8        | 17       | 27       |
| 1.1.1.35    | 1        | 1        | 6        | 3        | 0        | 0        | 8        | 3        | 3       | 2        | 2        | 2        | 0        | 5        | 2        | 5        | 0        | 5        | 3        |
| 1.1.2.99.6  | 0        | 2        | 1        | 2        | 3        | 2        | 1        | 2        | 0       | 3        | 1        | 0        | 2        | 1        | 1        | 0        | 0        | 1        | 3        |
| 1.1.3.11.-  | 0        | 0        | 0        | 0        | 0        | 0        | 0        | 0        | 0       | 0        | 0        | 0        | 0        | 0        | 0        | 0        | 0        | 0        | 0        |
| 1.1.3.11.1  | 0        | 0        | 0        | 0        | 0        | 0        | 0        | 0        | 0       | 0        | 0        | 0        | 0        | 0        | 0        | 0        | 0        | 0        | 0        |
| 1.1.3.11.2  | 0        | 0        | 0        | 0        | 0        | 0        | 0        | 0        | 0       | 0        | 0        | 0        | 0        | 0        | 0        | 0        | 0        | 0        | 0        |
| 1.1.3.11.3  | 0        | 0        | 0        | 0        | 0        | 0        | 0        | 0        | 0       | 0        | 0        | 0        | 0        | 0        | 0        | 0        | 0        | 0        | 0        |
| 1.1.3.11.39 | 0        | 0        | 0        | 0        | 0        | 0        | 0        | 0        | 0       | 0        | 0        | 0        | 0        | 0        | 0        | 0        | 0        | 0        | 0        |
| 1.1.3.11.5  | 0        | 0        | 0        | 0        | 0        | 0        | 0        | 1        | 0       | 0        | 0        | 0        | 2        | 0        | 0        | 1        | 0        | 0        | 1        |
| 1.1.3.11.8  | 0        | 0        | 0        | 0        | 0        | 0        | 0        | 0        | 0       | 0        | 0        | 0        | 0        | 0        | 0        | 0        | 0        | 0        | 0        |
| 1.1.4.12.10 | 0        | 0        | 0        | 0        | 0        | 0        | 0        | 0        | 0       | 0        | 0        | 1        | 0        | 0        | 0        | 0        | 0        | 0        | 1        |
| 1.1.4.12.13 | 0        | 0        | 0        | 0        | 0        | 0        | 0        | 0        | 0       | 0        | 0        | 0        | 0        | 0        | 0        | 0        | 0        | 0        | 0        |
| 1.1.4.12.18 | 0        | 0        | 0        | 0        | 0        | 0        | 0        | 0        | 0       | 0        | 0        | 0        | 0        | 0        | 0        | 0        | 0        | 0        | 0        |
| 1.1.4.13.-  | 0        | 0        | 0        | 0        | 0        | 1        | 0        | 0        | 0       | 0        | 0        | 0        | 0        | 0        | 0        | 0        | 0        | 0        | 0        |
| 1.1.4.13.1  | 0        | 0        | 0        | 0        | 0        | 0        | 0        | 0        | 0       | 0        | 0        | 0        | 0        | 0        | 0        | 0        | 0        | 0        | 0        |
| 1.1.4.13.2  | 0        | 0        | 0        | 0        | 0        | 0        | 0        | 0        | 0       | 0        | 0        | 0        | 0        | 0        | 0        | 0        | 0        | 0        | 0        |
| 1.1.4.13.50 | 0        | 0        | 0        | 0        | 0        | 0        | 0        | 0        | 0       | 0        | 0        | 0        | 0        | 0        | 0        | 0        | 0        | 0        | 0        |
| 1.1.4.13.7  | 0        | 0        | 1        | 0        | 0        | 0        | 0        | 0        | 0       | 0        | 0        | 1        | 0        | 0        | 0        | 0        | 0        | 0        | 0        |
| 1.1.4.13.8  | 0        | 0        | 0        | 0        | 0        | 0        | 0        | 0        | 0       | 0        | 0        | 0        | 0        | 0        | 0        | 0        | 0        | 0        | 0        |
| 1.1.4.13.82 | 1        | 0        | 0        | 0        | 0        | 0        | 0        | 0        | 0       | 0        | 0        | 0        | 0        | 0        | 0        | 0        | 0        | 0        | 0        |
| 1.1.4.99.-  | 0        | 0        | 0        | 0        | 0        | 0        | 0        | 0        | 0       | 0        | 0        | 0        | 0        | 0        | 0        | 0        | 0        | 0        | 0        |
| 1.1.7.99.1  | 0        | 0        | 0        | 0        | 0        | 0        | 0        | 0        | 0       | 0        | 0        | 0        | 0        | 0        | 0        | 0        | 0        | 0        | 0        |
| 1.1.8.6.1   | 0        | 0        | 0        | 0        | 0        | 0        | 0        | 0        | 0       | 0        | 0        | 0        | 0        | 0        | 1        | 0        | 0        | 0        | 0        |
| 1.2.1.-     | 0        | 0        | 0        | 0        | 0        | 0        | 0        | 0        | 0       | 0        | 0        | 0        | 0        | 0        | 0        | 0        | 0        | 0        | 0        |
| 1.2.1.10    | 5        | 4        | 5        | 7        | 2        | 3        | 5        | 4        | 6       | 5        | 4        | 4        | 4        | 5        | 5        | 3        | 3        | 8        | 5        |
| 1.2.1.3     | 6        | 8        | 9        | 6        | 10       | 9        | 12       | 6        | 10      | 8        | 5        | 7        | 13       | 14       | 7        | 8        | 2        | 5        | 7        |
| 1.2.1.39    | 0        | 0        | 0        | 0        | 0        | 0        | 0        | 0        | 0       | 0        | 0        | 0        | 0        | 0        | 0        | 0        | 0        | 0        | 0        |
| 1.2.7.1     | 13       | 14       | 15       | 8        | 17       | 7        | 21       | 14       | 20      | 16       | 5        | 8        | 12       | 17       | 12       | 10       | 3        | 7        | 17       |
| 1.2.99.2    | 1        | 4        | 2        | 4        | 2        | 4        | 2        | 5        | 4       | 4        | 1        | 4        | 4        | 3        | 3        | 3        | 1        | 1        | 2        |
| 1.3.1.-     | 0        | 0        | 1        | 0        | 0        | 0        | 0        | 1        | 0       | 0        | 0        | 0        | 0        | 0        | 0        | 0        | 0        | 0        | 0        |
| 1.3.1.2     | 0        | 0        | 3        | 0        | 1        | 1        | 1        | 2        | 2       | 1        | 0        | 0        | 2        | 0        | 2        | 0        | 0        | 1        | 1        |
| 1.3.1.25    | 0        | 0        | 0        | 0        | 0        | 0        | 0        | 0        | 0       | 0        | 0        | 0        | 0        | 0        | 0        | 0        | 0        | 0        | 0        |
| 1.3.99.-    | 0        | 0        | 1        | 0        | 0        | 0        | 0        | 0        | 0       | 0        | 0        | 0        | 0        | 1        | 0        | 0        | 0        | 0        | 0        |
| 1.6.5.-     | 30       | 38       | 45       | 25       | 41       | 52       | 58       | 57       | 57      | 48       | 32       | 36       | 47       | 63       | 29       | 41       | 12       | 37       | 45       |
| 1.7.1.-     | 9        | 10       | 11       | 7        | 10       | 5        | 13       | 8        | 12      | 9        | 9        | 6        | 6        | 10       | 4        | 12       | 4        | 6        | 15       |
| 1.8.99.3    | 1        | 0        | 0        | 0        | 0        | 1        | 0        | 0        | 0       | 1        | 0        | 0        | 0        | 0        | 0        | 0        | 0        | 1        | 0        |
| 2.1.1.-     | 262      | 249      | 305      | 283      | 258      | 249      | 350      | 357      | 373     | 301      | 162      | 247      | 314      | 342      | 251      | 324      | 100      | 194      | 333      |
| 2.3.1.-     | 125      | 146      | 141      | 163      | 190      | 129      | 185      | 191      | 237     | 162      | 106      | 141      | 164      | 182      | 139      | 160      | 40       | 103      | 190      |
| 2.3.1.16    | 2        | 2        | 2        | 0        | 2        | 2        | 0        | 2        | 1       | 0        | 0        | 1        | 2        | 1        | 1        | 0        | 0        | 2        | 1        |
| 2.3.1.5     | 0        | 0        | 0        | 0        | 0        | 0        | 0        | 0        | 0       | 0        | 0        | 0        | 0        | 0        | 0        | 0        | 0        | 0        | 0        |
| 2.3.1.9     | 2        | 1        | 0        | 1        | 1        | 0        | 2        | 1        | 1       | 2        | 0        | 0        | 0        | 2        | 0        | 1        | 0        | 2        | 0        |
| 2.4.2.10    | 15       | 7        | 13       | 17       | 11       | 10       | 21       | 13       | 21      | 12       | 11       | 9        | 17       | 20       | 13       | 15       | 5        | 12       | 17       |
| 2.4.2.3     | 14       | 10       | 14       | 6        | 13       | 10       | 17       | 11       | 8       | 18       | 3        | 13       | 13       | 14       | 8        | 11       | 2        | 8        | 12       |
| 2.4.2.4     | 8        | 9        | 5        | 7        | 3        | 4        | 6        | 12       | 3       | 3        | 0        | 1        | 4        | 7        | 6        | 5        | 1        | 7        | 6        |
| 2.4.2.8     | 13       | 10       | 14       | 12       | 10       | 13       | 22       | 12       | 17      | 14       | 7        | 12       | 16       | 19       | 18       | 22       | 5        | 13       | 19       |
| 2.5.1.-     | 16       | 16       | 22       | 19       | 23       | 16       | 28       | 23       | 24      | 17       | 13       | 23       | 20       | 30       | 12       | 22       | 6        | 12       | 27       |

| EC/KO    | DA-AD-62 | DA-AD-63 | DA-AD-64 | DA-AD-65 | DA-AD-66 | DA-AD-67 | DA-AD-68 | DA-AD-69 | DA-AD-7 | DA-AD-70 | DA-AD-71 | DA-AD-72 | DA-AD-73 | DA-AD-74 | DA-AD-75 | DA-AD-76 | DA-AD-77 | DA-AD-78 | DA-AD-79 |
|----------|----------|----------|----------|----------|----------|----------|----------|----------|---------|----------|----------|----------|----------|----------|----------|----------|----------|----------|----------|
| 2.5.1.18 | 1        | 0        | 0        | 0        | 0        | 0        | 1        | 2        | 3       | 1        | 0        | 1        | 1        | 1        | 0        | 3        | 0        | 4        | 1        |
| 2.6.1.-  | 29       | 38       | 39       | 29       | 49       | 35       | 31       | 48       | 54      | 29       | 25       | 34       | 40       | 41       | 33       | 41       | 9        | 19       | 47       |
| 2.7.1.21 | 7        | 7        | 15       | 10       | 6        | 5        | 12       | 11       | 6       | 8        | 5        | 5        | 4        | 10       | 8        | 8        | 2        | 12       | 11       |
| 2.7.1.48 | 23       | 29       | 40       | 31       | 30       | 25       | 42       | 39       | 33      | 25       | 15       | 26       | 26       | 42       | 32       | 36       | 9        | 24       | 37       |
| 2.7.4.-  | 14       | 15       | 23       | 22       | 17       | 17       | 24       | 23       | 22      | 14       | 8        | 14       | 16       | 25       | 12       | 17       | 5        | 13       | 22       |
| 2.8.3.-  | 1        | 1        | 5        | 1        | 1        | 2        | 2        | 0        | 1       | 0        | 1        | 1        | 3        | 1        | 3        | 0        | 0        | 0        | 2        |
| 2.8.3.1  | 0        | 0        | 0        | 0        | 0        | 0        | 0        | 0        | 0       | 1        | 0        | 1        | 2        | 0        | 0        | 0        | 0        | 1        | 0        |
| 2.8.3.12 | 1        | 0        | 0        | 2        | 0        | 2        | 0        | 2        | 1       | 0        | 1        | 0        | 2        | 0        | 0        | 0        | 0        | 0        | 0        |
| 2.8.3.6  | 1        | 0        | 0        | 0        | 0        | 0        | 0        | 1        | 0       | 0        | 0        | 0        | 0        | 0        | 0        | 0        | 0        | 0        | 0        |
| 2.8.3.8  | 3        | 1        | 3        | 0        | 1        | 1        | 2        | 2        | 3       | 1        | 0        | 2        | 5        | 1        | 0        | 0        | 0        | 2        | 0        |
| 3.1.1.-  | 3        | 6        | 3        | 6        | 7        | 8        | 2        | 8        | 5       | 8        | 6        | 10       | 14       | 3        | 7        | 4        | 1        | 7        | 10       |
| 3.1.1.1  | 2        | 4        | 3        | 6        | 6        | 9        | 7        | 6        | 14      | 8        | 3        | 5        | 10       | 5        | 3        | 3        | 1        | 1        | 7        |
| 3.1.1.17 | 0        | 1        | 0        | 4        | 5        | 3        | 1        | 2        | 4       | 2        | 1        | 1        | 3        | 1        | 1        | 1        | 0        | 0        | 2        |
| 3.1.1.2  | 0        | 0        | 0        | 0        | 0        | 0        | 0        | 1        | 0       | 0        | 0        | 0        | 0        | 1        | 1        | 1        | 0        | 1        | 0        |
| 3.1.1.24 | 5        | 4        | 2        | 2        | 2        | 0        | 4        | 1        | 3       | 4        | 1        | 0        | 4        | 9        | 2        | 1        | 2        | 3        | 4        |
| 3.1.1.45 | 0        | 0        | 0        | 0        | 0        | 0        | 0        | 0        | 0       | 0        | 0        | 0        | 0        | 0        | 0        | 0        | 0        | 1        | 0        |
| 3.1.2.-  | 0        | 0        | 0        | 0        | 0        | 0        | 1        | 0        | 0       | 1        | 2        | 0        | 0        | 0        | 0        | 0        | 0        | 0        | 0        |
| 3.1.2.23 | 2        | 5        | 4        | 5        | 5        | 6        | 6        | 6        | 6       | 6        | 3        | 5        | 2        | 9        | 2        | 6        | 1        | 3        | 8        |
| 3.1.3.1  | 9        | 10       | 14       | 11       | 25       | 18       | 24       | 13       | 19      | 13       | 4        | 18       | 25       | 15       | 11       | 13       | 4        | 7        | 17       |
| 3.1.3.2  | 4        | 5        | 5        | 2        | 6        | 4        | 6        | 4        | 7       | 3        | 3        | 5        | 2        | 4        | 4        | 3        | 1        | 3        | 3        |
| 3.1.3.41 | 0        | 0        | 0        | 0        | 0        | 0        | 1        | 0        | 0       | 0        | 0        | 0        | 0        | 0        | 0        | 0        | 0        | 0        | 0        |
| 3.2.1.31 | 1        | 5        | 5        | 5        | 6        | 5        | 4        | 6        | 5       | 7        | 5        | 8        | 5        | 5        | 4        | 2        | 2        | 1        | 3        |
| 3.3.2.9  | 0        | 0        | 0        | 0        | 0        | 0        | 0        | 0        | 0       | 0        | 0        | 0        | 0        | 0        | 0        | 0        | 0        | 0        | 0        |
| 3.5.1.-  | 27       | 27       | 38       | 30       | 21       | 23       | 49       | 35       | 28      | 22       | 18       | 24       | 25       | 32       | 28       | 38       | 11       | 21       | 37       |
| 3.5.1.4  | 2        | 3        | 2        | 1        | 2        | 3        | 5        | 2        | 3       | 2        | 2        | 4        | 2        | 0        | 3        | 2        | 1        | 1        | 3        |
| 3.5.1.5  | 1        | 1        | 0        | 0        | 1        | 1        | 1        | 0        | 2       | 2        | 2        | 0        | 2        | 1        | 0        | 0        | 0        | 1        | 4        |
| 3.5.1.54 | 4        | 4        | 2        | 5        | 3        | 7        | 4        | 0        | 4       | 2        | 5        | 4        | 5        | 5        | 1        | 5        | 1        | 2        | 4        |
| 3.5.1.6  | 0        | 0        | 0        | 0        | 1        | 3        | 2        | 0        | 2       | 0        | 2        | 2        | 1        | 1        | 2        | 0        | 1        | 0        | 3        |
| 3.5.2.-  | 0        | 0        | 0        | 0        | 0        | 1        | 0        | 0        | 0       | 0        | 0        | 1        | 0        | 0        | 0        | 0        | 0        | 0        | 0        |
| 3.5.2.2  | 2        | 1        | 0        | 0        | 1        | 0        | 4        | 1        | 2       | 2        | 1        | 1        | 5        | 2        | 2        | 0        | 1        | 1        | 3        |
| 3.5.4.-  | 19       | 26       | 44       | 32       | 28       | 22       | 37       | 31       | 32      | 23       | 15       | 21       | 24       | 32       | 21       | 24       | 8        | 22       | 35       |
| 3.5.4.5  | 20       | 17       | 22       | 9        | 15       | 9        | 25       | 18       | 15      | 16       | 8        | 11       | 9        | 19       | 18       | 19       | 4        | 19       | 22       |
| 3.5.5.1  | 2        | 1        | 2        | 2        | 1        | 1        | 0        | 1        | 1       | 0        | 0        | 1        | 4        | 1        | 2        | 0        | 0        | 1        | 2        |
| 3.5.5.7  | 0        | 0        | 0        | 0        | 0        | 0        | 0        | 0        | 0       | 0        | 0        | 0        | 0        | 0        | 0        | 0        | 0        | 0        | 0        |
| 3.5.99.3 | 1        | 0        | 0        | 0        | 0        | 0        | 0        | 0        | 0       | 0        | 0        | 0        | 1        | 0        | 0        | 0        | 0        | 1        | 0        |
| 3.6.1.7  | 2        | 3        | 7        | 2        | 7        | 8        | 4        | 8        | 8       | 8        | 5        | 9        | 6        | 3        | 3        | 7        | 1        | 0        | 9        |
| 3.7.1.-  | 1        | 1        | 0        | 1        | 2        | 0        | 0        | 1        | 2       | 2        | 0        | 0        | 2        | 2        | 0        | 2        | 1        | 1        | 1        |
| 3.7.1.2  | 2        | 4        | 2        | 6        | 6        | 3        | 6        | 4        | 6       | 5        | 2        | 3        | 5        | 2        | 5        | 6        | 0        | 1        | 4        |
| 3.8.1.2  | 4        | 7        | 9        | 7        | 7        | 4        | 6        | 9        | 7       | 7        | 4        | 3        | 5        | 8        | 7        | 9        | 2        | 2        | 9        |
| 3.8.1.3  | 0        | 0        | 0        | 0        | 0        | 0        | 0        | 0        | 0       | 0        | 0        | 0        | 0        | 0        | 0        | 0        | 0        | 0        | 0        |
| 3.8.1.5  | 1        | 0        | 0        | 3        | 0        | 1        | 2        | 0        | 1       | 2        | 0        | 0        | 1        | 2        | 0        | 0        | 0        | 2        | 1        |
| 4.1.1.-  | 6        | 5        | 7        | 4        | 12       | 9        | 13       | 10       | 10      | 14       | 3        | 14       | 16       | 10       | 5        | 13       | 2        | 3        | 9        |
| 4.1.1.44 | 17       | 26       | 18       | 24       | 19       | 15       | 43       | 29       | 31      | 29       | 23       | 26       | 26       | 30       | 21       | 24       | 7        | 15       | 33       |
| 4.1.1.55 | 0        | 0        | 0        | 0        | 0        | 0        | 0        | 0        | 0       | 0        | 0        | 1        | 0        | 0        | 0        | 0        | 0        | 0        | 0        |
| 4.1.1.7  | 0        | 0        | 0        | 0        | 0        | 0        | 0        | 0        | 0       | 0        | 0        | 0        | 0        | 0        | 0        | 0        | 0        | 0        | 0        |
| 4.1.1.70 | 0        | 0        | 0        | 0        | 0        | 1        | 0        | 0        | 0       | 0        | 1        | 1        | 0        | 0        | 0        | 0        | 0        | 0        | 0        |
| 4.1.1.77 | 0        | 0        | 0        | 0        | 0        | 0        | 0        | 0        | 0       | 0        | 0        | 0        | 0        | 0        | 0        | 0        | 0        | 0        | 0        |
| 4.1.2.-  | 4        | 3        | 7        | 10       | 2        | 3        | 8        | 4        | 4       | 7        | 3        | 7        | 7        | 9        | 5        | 4        | 3        | 6        | 8        |
| 4.1.3.-  | 14       | 18       | 24       | 14       | 23       | 17       | 27       | 27       | 29      | 13       | 12       | 22       | 17       | 27       | 22       | 23       | 6        | 8        | 27       |

| EC/KO    | DA-AD-62 | DA-AD-63 | DA-AD-64 | DA-AD-65 | DA-AD-66 | DA-AD-67 | DA-AD-68 | DA-AD-69 | DA-AD-7 | DA-AD-70 | DA-AD-71 | DA-AD-72 | DA-AD-73 | DA-AD-74 | DA-AD-75 | DA-AD-76 | DA-AD-77 | DA-AD-78 | DA-AD-79 |
|----------|----------|----------|----------|----------|----------|----------|----------|----------|---------|----------|----------|----------|----------|----------|----------|----------|----------|----------|----------|
| 4.1.3.39 | 1        | 0        | 0        | 0        | 0        | 1        | 0        | 2        | 0       | 0        | 1        | 0        | 0        | 1        | 1        | 1        | 0        | 1        | 0        |
| 4.1.99.- | 3        | 3        | 4        | 2        | 3        | 2        | 5        | 3        | 1       | 2        | 2        | 2        | 2        | 2        | 4        | 2        | 1        | 1        | 3        |
| 4.2.1.-  | 36       | 47       | 45       | 44       | 56       | 58       | 47       | 43       | 69      | 48       | 46       | 43       | 61       | 58       | 36       | 61       | 19       | 25       | 76       |
| 4.2.1.17 | 4        | 4        | 8        | 6        | 6        | 7        | 5        | 10       | 12      | 2        | 2        | 6        | 8        | 4        | 1        | 3        | 1        | 5        | 3        |
| 4.2.1.80 | 0        | 0        | 0        | 0        | 0        | 0        | 0        | 0        | 0       | 0        | 0        | 0        | 0        | 0        | 0        | 0        | 0        | 0        | 0        |
| 4.2.1.83 | 0        | 2        | 0        | 0        | 2        | 0        | 1        | 3        | 0       | 0        | 0        | 1        | 0        | 1        | 1        | 0        | 1        | 0        | 0        |
| 4.2.1.84 | 1        | 1        | 0        | 0        | 1        | 0        | 0        | 1        | 0       | 0        | 0        | 1        | 1        | 0        | 2        | 1        | 0        | 0        | 0        |
| 5.1.2.2  | 0        | 0        | 0        | 0        | 0        | 0        | 0        | 0        | 0       | 0        | 0        | 0        | 1        | 0        | 0        | 0        | 0        | 0        | 0        |
| 5.2.1.2  | 0        | 0        | 0        | 0        | 0        | 0        | 0        | 0        | 0       | 0        | 0        | 0        | 0        | 0        | 0        | 0        | 0        | 0        | 0        |
| 5.3.3.4  | 0        | 0        | 0        | 0        | 0        | 0        | 0        | 0        | 0       | 0        | 0        | 0        | 0        | 0        | 0        | 0        | 0        | 0        | 0        |
| 5.3.99.- | 2        | 4        | 3        | 3        | 2        | 3        | 2        | 5        | 4       | 6        | 2        | 3        | 4        | 2        | 0        | 4        | 4        | 1        | 3        |
| 5.4.99.- | 1        | 1        | 1        | 0        | 0        | 0        | 0        | 1        | 1       | 0        | 0        | 2        | 0        | 1        | 0        | 1        | 0        | 0        | 1        |
| 5.5.1.1  | 2        | 1        | 2        | 3        | 5        | 4        | 2        | 1        | 5       | 4        | 1        | 2        | 4        | 4        | 2        | 1        | 0        | 1        | 4        |
| 5.5.1.2  | 0        | 0        | 0        | 0        | 0        | 1        | 0        | 0        | 0       | 0        | 0        | 0        | 0        | 0        | 0        | 0        | 0        | 0        | 0        |
| 6.2.1.-  | 0        | 0        | 0        | 0        | 0        | 0        | 0        | 0        | 0       | 0        | 0        | 0        | 0        | 0        | 0        | 0        | 0        | 0        | 0        |
| 6.3.5.2  | 15       | 21       | 17       | 26       | 22       | 10       | 24       | 14       | 21      | 26       | 13       | 19       | 20       | 16       | 15       | 18       | 5        | 14       | 18       |
| K00002   | 3        | 1        | 1        | 0        | 2        | 4        | 3        | 4        | 4       | 3        | 1        | 0        | 3        | 3        | 0        | 4        | 0        | 0        | 0        |
| K00055   | 0        | 0        | 0        | 0        | 0        | 0        | 0        | 0        | 1       | 0        | 0        | 0        | 0        | 0        | 0        | 0        | 0        | 0        | 1        |
| K00074   | 3        | 3        | 8        | 3        | 2        | 1        | 10       | 5        | 4       | 2        | 4        | 3        | 4        | 6        | 3        | 4        | 1        | 9        | 4        |
| K00088   | 17       | 13       | 22       | 15       | 17       | 16       | 17       | 12       | 20      | 14       | 7        | 13       | 19       | 24       | 12       | 15       | 6        | 14       | 12       |
| K00100   | 36       | 37       | 37       | 44       | 55       | 43       | 62       | 42       | 77      | 47       | 29       | 53       | 62       | 54       | 38       | 54       | 11       | 22       | 54       |
| K00128   | 4        | 2        | 3        | 3        | 2        | 0        | 1        | 2        | 0       | 2        | 0        | 2        | 1        | 3        | 0        | 1        | 1        | 2        | 3        |
| K00129   | 0        | 0        | 0        | 0        | 0        | 0        | 0        | 0        | 0       | 0        | 0        | 0        | 0        | 0        | 0        | 0        | 0        | 0        | 0        |
| K00132   | 0        | 1        | 1        | 0        | 0        | 0        | 3        | 1        | 0       | 1        | 0        | 0        | 1        | 0        | 0        | 2        | 0        | 0        | 1        |
| K00141   | 0        | 0        | 0        | 0        | 0        | 0        | 0        | 0        | 0       | 0        | 0        | 0        | 0        | 0        | 0        | 0        | 0        | 0        | 0        |
| K00146   | 0        | 0        | 0        | 0        | 0        | 0        | 0        | 0        | 0       | 0        | 0        | 0        | 0        | 0        | 0        | 0        | 0        | 0        | 0        |
| K00148   | 0        | 0        | 0        | 0        | 0        | 0        | 0        | 0        | 0       | 0        | 0        | 0        | 0        | 0        | 0        | 0        | 0        | 0        | 0        |
| K00155   | 0        | 1        | 0        | 0        | 0        | 0        | 0        | 0        | 1       | 0        | 0        | 1        | 0        | 0        | 1        | 0        | 0        | 0        | 0        |
| K00169   | 3        | 3        | 3        | 2        | 2        | 0        | 2        | 1        | 5       | 3        | 0        | 3        | 2        | 2        | 0        | 4        | 0        | 0        | 4        |
| K00224   | 0        | 1        | 0        | 1        | 1        | 1        | 1        | 0        | 1       | 0        | 1        | 1        | 1        | 1        | 1        | 1        | 0        | 0        | 0        |
| K00274   | 0        | 0        | 0        | 0        | 0        | 0        | 0        | 0        | 0       | 0        | 0        | 0        | 0        | 0        | 0        | 0        | 0        | 0        | 0        |
| K00446   | 0        | 0        | 0        | 0        | 0        | 0        | 0        | 0        | 0       | 0        | 0        | 0        | 0        | 0        | 0        | 0        | 0        | 0        | 0        |
| K00448   | 0        | 0        | 0        | 0        | 0        | 0        | 0        | 0        | 0       | 0        | 0        | 0        | 0        | 0        | 0        | 0        | 0        | 0        | 0        |
| K00462   | 0        | 1        | 0        | 1        | 1        | 1        | 1        | 0        | 3       | 1        | 2        | 0        | 1        | 1        | 1        | 1        | 0        | 0        | 0        |
| K00480   | 0        | 0        | 0        | 0        | 0        | 0        | 0        | 0        | 0       | 0        | 0        | 0        | 0        | 0        | 0        | 0        | 0        | 0        | 0        |
| K00481   | 0        | 0        | 0        | 0        | 0        | 0        | 0        | 0        | 0       | 0        | 0        | 0        | 0        | 0        | 0        | 0        | 0        | 0        | 0        |
| K00539   | 0        | 0        | 0        | 0        | 0        | 2        | 1        | 3        | 2       | 0        | 0        | 0        | 3        | 2        | 0        | 2        | 0        | 0        | 0        |
| K00599   | 41       | 39       | 53       | 41       | 48       | 45       | 47       | 70       | 57      | 40       | 27       | 45       | 48       | 50       | 47       | 62       | 12       | 18       | 63       |
| K00626   | 4        | 3        | 2        | 2        | 3        | 4        | 4        | 3        | 2       | 3        | 0        | 1        | 4        | 3        | 1        | 2        | 1        | 5        | 1        |
| K00632   | 0        | 0        | 0        | 0        | 0        | 0        | 0        | 0        | 0       | 0        | 0        | 0        | 0        | 0        | 0        | 0        | 0        | 0        | 0        |
| K00680   | 35       | 37       | 43       | 43       | 40       | 35       | 64       | 49       | 57      | 50       | 28       | 36       | 42       | 48       | 37       | 48       | 6        | 35       | 63       |
| K00757   | 11       | 9        | 13       | 8        | 13       | 13       | 13       | 15       | 12      | 15       | 3        | 16       | 14       | 15       | 10       | 11       | 2        | 6        | 9        |
| K00758   | 5        | 0        | 6        | 7        | 3        | 5        | 7        | 8        | 6       | 2        | 6        | 2        | 3        | 8        | 6        | 8        | 1        | 6        | 1        |
| K00760   | 28       | 21       | 27       | 29       | 19       | 23       | 39       | 23       | 36      | 23       | 16       | 21       | 23       | 30       | 27       | 31       | 7        | 19       | 32       |
| K00799   | 0        | 0        | 1        | 0        | 0        | 0        | 0        | 2        | 1       | 0        | 0        | 0        | 0        | 0        | 1        | 0        | 0        | 4        | 1        |
| K00857   | 15       | 11       | 22       | 17       | 11       | 8        | 20       | 14       | 18      | 11       | 7        | 5        | 7        | 16       | 10       | 15       | 2        | 19       | 13       |
| K00876   | 28       | 24       | 38       | 32       | 30       | 21       | 37       | 30       | 30      | 24       | 11       | 24       | 28       | 34       | 28       | 29       | 7        | 24       | 34       |
| K01026   | 2        | 2        | 1        | 0        | 0        | 1        | 2        | 2        | 2       | 0        | 0        | 1        | 1        | 0        | 0        | 1        | 0        | 0        | 0        |
| K01031   | 0        | 0        | 0        | 0        | 0        | 0        | 0        | 0        | 0       | 0        | 0        | 0        | 0        | 0        | 0        | 0        | 0        | 0        | 0        |



| EC/KO  | DA-AD-62 | DA-AD-63 | DA-AD-64 | DA-AD-65 | DA-AD-66 | DA-AD-67 | DA-AD-68 | DA-AD-69 | DA-AD-7 | DA-AD-70 | DA-AD-71 | DA-AD-72 | DA-AD-73 | DA-AD-74 | DA-AD-75 | DA-AD-76 | DA-AD-77 | DA-AD-78 | DA-AD-79 |
|--------|----------|----------|----------|----------|----------|----------|----------|----------|---------|----------|----------|----------|----------|----------|----------|----------|----------|----------|----------|
| K01034 | 2        | 1        | 0        | 5        | 1        | 1        | 1        | 2        | 3       | 3        | 0        | 0        | 2        | 1        | 1        | 1        | 0        | 4        | 1        |
| K01039 | 0        | 0        | 0        | 0        | 0        | 0        | 0        | 2        | 0       | 0        | 0        | 1        | 1        | 1        | 0        | 0        | 0        | 0        | 0        |
| K01041 | 3        | 4        | 4        | 4        | 4        | 5        | 5        | 7        | 6       | 5        | 1        | 4        | 4        | 4        | 4        | 3        | 1        | 3        | 3        |
| K01053 | 0        | 0        | 0        | 1        | 0        | 0        | 0        | 0        | 1       | 0        | 0        | 0        | 1        | 0        | 0        | 0        | 0        | 0        | 0        |
| K01055 | 0        | 0        | 0        | 0        | 0        | 0        | 0        | 0        | 0       | 0        | 0        | 0        | 0        | 0        | 0        | 0        | 0        | 0        | 0        |
| K01061 | 0        | 0        | 0        | 0        | 0        | 0        | 0        | 0        | 0       | 0        | 0        | 0        | 0        | 0        | 0        | 0        | 0        | 2        | 0        |
| K01066 | 5        | 2        | 3        | 12       | 8        | 10       | 8        | 8        | 8       | 9        | 4        | 3        | 8        | 9        | 2        | 5        | 0        | 3        | 6        |
| K01075 | 0        | 0        | 0        | 1        | 1        | 0        | 1        | 2        | 1       | 0        | 0        | 2        | 0        | 1        | 1        | 1        | 0        | 2        | 0        |
| K01077 | 5        | 4        | 10       | 7        | 10       | 9        | 7        | 7        | 7       | 9        | 3        | 5        | 12       | 7        | 8        | 6        | 0        | 3        | 11       |
| K01101 | 5        | 1        | 8        | 6        | 2        | 2        | 6        | 3        | 8       | 2        | 2        | 4        | 2        | 4        | 4        | 1        | 1        | 7        | 1        |
| K01195 | 6        | 9        | 8        | 9        | 9        | 11       | 12       | 7        | 13      | 8        | 12       | 9        | 9        | 9        | 9        | 3        | 1        | 1        | 3        |
| K01426 | 1        | 0        | 0        | 1        | 0        | 1        | 0        | 1        | 0       | 1        | 1        | 0        | 0        | 0        | 2        | 1        | 0        | 1        | 0        |
| K01428 | 0        | 0        | 0        | 0        | 1        | 0        | 1        | 0        | 0       | 1        | 0        | 0        | 3        | 0        | 0        | 0        | 0        | 0        | 0        |
| K01457 | 0        | 0        | 0        | 0        | 0        | 0        | 0        | 0        | 0       | 0        | 0        | 0        | 0        | 0        | 0        | 0        | 0        | 0        | 0        |
| K01464 | 3        | 0        | 0        | 1        | 1        | 0        | 4        | 1        | 1       | 4        | 1        | 1        | 5        | 2        | 2        | 0        | 0        | 2        | 2        |
| K01489 | 21       | 18       | 26       | 18       | 22       | 12       | 27       | 25       | 21      | 22       | 13       | 14       | 13       | 29       | 18       | 22       | 7        | 22       | 23       |
| K01500 | 0        | 0        | 0        | 0        | 0        | 0        | 0        | 0        | 0       | 0        | 0        | 0        | 0        | 0        | 0        | 0        | 0        | 0        | 0        |
| K01501 | 2        | 1        | 2        | 5        | 0        | 2        | 2        | 2        | 5       | 0        | 1        | 1        | 7        | 1        | 2        | 0        | 0        | 1        | 1        |
| K01502 | 0        | 0        | 0        | 0        | 0        | 0        | 0        | 0        | 0       | 0        | 0        | 0        | 0        | 0        | 0        | 0        | 0        | 0        | 0        |
| K01512 | 7        | 7        | 8        | 4        | 8        | 13       | 9        | 13       | 11      | 10       | 8        | 13       | 11       | 6        | 7        | 11       | 2        | 2        | 10       |
| K01560 | 6        | 6        | 7        | 5        | 3        | 3        | 9        | 5        | 8       | 8        | 1        | 4        | 4        | 8        | 2        | 6        | 5        | 5        | 2        |
| K01561 | 0        | 0        | 0        | 0        | 0        | 0        | 0        | 0        | 1       | 0        | 0        | 0        | 0        | 0        | 1        | 0        | 0        | 0        | 0        |
| K01563 | 0        | 0        | 0        | 0        | 0        | 0        | 0        | 0        | 0       | 0        | 0        | 0        | 0        | 0        | 0        | 0        | 0        | 0        | 0        |
| K01564 | 0        | 2        | 1        | 2        | 2        | 1        | 2        | 1        | 2       | 1        | 0        | 1        | 1        | 2        | 0        | 1        | 0        | 0        | 1        |
| K01607 | 8        | 17       | 9        | 13       | 10       | 8        | 19       | 18       | 11      | 11       | 11       | 11       | 12       | 14       | 4        | 10       | 4        | 8        | 19       |
| K01612 | 0        | 0        | 0        | 0        | 0        | 0        | 0        | 0        | 0       | 0        | 0        | 0        | 0        | 0        | 0        | 0        | 0        | 0        | 0        |
| K01615 | 15       | 14       | 14       | 15       | 17       | 11       | 6        | 15       | 17      | 17       | 10       | 10       | 22       | 25       | 6        | 7        | 2        | 11       | 11       |
| K01617 | 0        | 0        | 0        | 0        | 0        | 0        | 0        | 0        | 0       | 0        | 0        | 0        | 0        | 0        | 0        | 0        | 0        | 0        | 0        |
| K01666 | 6        | 8        | 10       | 4        | 3        | 8        | 8        | 15       | 11      | 5        | 5        | 8        | 5        | 8        | 7        | 8        | 2        | 2        | 9        |
| K01692 | 0        | 0        | 0        | 1        | 0        | 1        | 0        | 2        | 0       | 0        | 0        | 0        | 1        | 1        | 0        | 0        | 0        | 3        | 0        |
| K01721 | 0        | 0        | 0        | 0        | 0        | 0        | 0        | 0        | 0       | 0        | 0        | 0        | 0        | 0        | 0        | 0        | 0        | 0        | 0        |
| K01726 | 2        | 4        | 5        | 4        | 11       | 7        | 7        | 4        | 5       | 5        | 6        | 9        | 3        | 7        | 2        | 8        | 0        | 3        | 7        |
| K01781 | 0        | 0        | 0        | 0        | 1        | 2        | 2        | 0        | 0       | 2        | 0        | 1        | 3        | 0        | 0        | 0        | 0        | 0        | 0        |
| K01821 | 0        | 1        | 3        | 2        | 0        | 0        | 2        | 1        | 3       | 1        | 0        | 1        | 1        | 3        | 3        | 0        | 2        | 1        | 1        |
| K01856 | 0        | 0        | 0        | 0        | 0        | 0        | 0        | 0        | 0       | 0        | 0        | 0        | 0        | 0        | 0        | 0        | 0        | 0        | 0        |
| K01857 | 0        | 0        | 1        | 0        | 1        | 1        | 0        | 0        | 1       | 0        | 0        | 1        | 0        | 2        | 0        | 1        | 0        | 0        | 0        |
| K01913 | 0        | 0        | 1        | 1        | 0        | 0        | 0        | 0        | 1       | 0        | 0        | 0        | 1        | 0        | 1        | 0        | 0        | 0        | 0        |
| K01951 | 10       | 12       | 12       | 20       | 14       | 9        | 14       | 9        | 20      | 16       | 6        | 10       | 16       | 14       | 8        | 8        | 1        | 8        | 7        |
| K02554 | 0        | 0        | 0        | 0        | 0        | 0        | 0        | 0        | 0       | 0        | 0        | 0        | 1        | 0        | 0        | 0        | 0        | 0        | 0        |
| K03381 | 0        | 0        | 0        | 0        | 0        | 0        | 0        | 0        | 0       | 0        | 0        | 0        | 0        | 0        | 0        | 0        | 0        | 0        | 0        |
| K03382 | 1        | 0        | 1        | 0        | 0        | 0        | 1        | 0        | 1       | 0        | 0        | 0        | 2        | 1        | 0        | 0        | 0        | 1        | 0        |
| K03464 | 0        | 0        | 0        | 0        | 0        | 0        | 0        | 0        | 0       | 0        | 0        | 0        | 0        | 0        | 0        | 0        | 0        | 0        | 0        |
| K03518 | 10       | 8        | 4        | 7        | 6        | 6        | 9        | 9        | 14      | 12       | 8        | 9        | 20       | 13       | 3        | 4        | 3        | 8        | 10       |
| K03862 | 0        | 0        | 0        | 0        | 0        | 0        | 0        | 0        | 0       | 0        | 0        | 0        | 0        | 0        | 0        | 0        | 0        | 0        | 0        |
| K04099 | 0        | 0        | 0        | 0        | 0        | 0        | 0        | 0        | 0       | 0        | 0        | 0        | 0        | 0        | 0        | 0        | 0        | 0        | 0        |
| K04100 | 0        | 0        | 0        | 0        | 0        | 0        | 0        | 0        | 0       | 0        | 0        | 0        | 0        | 0        | 0        | 0        | 0        | 0        | 0        |
| K04102 | 0        | 0        | 0        | 0        | 0        | 0        | 0        | 0        | 0       | 0        | 0        | 0        | 0        | 0        | 0        | 0        | 0        | 0        | 0        |
| K04116 | 0        | 0        | 0        | 0        | 0        | 0        | 0        | 0        | 0       | 0        | 0        | 0        | 0        | 0        | 0        | 0        | 0        | 0        | 0        |
| K05394 | 1        | 0        | 1        | 3        | 0        | 1        | 1        | 0        | 1       | 1        | 0        | 1        | 1        | 0        | 1        | 0        | 0        | 0        | 0        |

| EC/KO  | DA-AD-62 | DA-AD-63 | DA-AD-64 | DA-AD-65 | DA-AD-66 | DA-AD-67 | DA-AD-68 | DA-AD-69 | DA-AD-7 | DA-AD-70 | DA-AD-71 | DA-AD-72 | DA-AD-73 | DA-AD-74 | DA-AD-75 | DA-AD-76 | DA-AD-77 | DA-AD-78 | DA-AD-79 |
|--------|----------|----------|----------|----------|----------|----------|----------|----------|---------|----------|----------|----------|----------|----------|----------|----------|----------|----------|----------|
| K05549 | 0        | 0        | 0        | 0        | 0        | 0        | 0        | 0        | 0       | 0        | 0        | 0        | 0        | 0        | 0        | 0        | 0        | 0        | 0        |
| K05783 | 0        | 0        | 0        | 0        | 0        | 0        | 0        | 0        | 0       | 0        | 0        | 0        | 0        | 0        | 0        | 0        | 0        | 0        | 0        |
| K05797 | 0        | 0        | 0        | 0        | 0        | 0        | 0        | 0        | 0       | 0        | 0        | 0        | 0        | 0        | 0        | 0        | 0        | 0        | 0        |
| K06281 | 0        | 2        | 1        | 2        | 2        | 2        | 1        | 1        | 0       | 2        | 1        | 0        | 2        | 0        | 0        | 0        | 0        | 0        | 3        |
| K06446 | 4        | 1        | 2        | 4        | 3        | 9        | 8        | 3        | 6       | 4        | 2        | 6        | 6        | 4        | 1        | 0        | 2        | 2        | 3        |
| K06912 | 0        | 0        | 0        | 0        | 0        | 0        | 0        | 0        | 0       | 0        | 0        | 0        | 0        | 0        | 0        | 0        | 0        | 0        | 0        |
| K07535 | 0        | 0        | 1        | 0        | 0        | 0        | 0        | 0        | 0       | 0        | 0        | 0        | 0        | 0        | 0        | 1        | 0        | 0        | 0        |
| K07536 | 0        | 1        | 1        | 2        | 4        | 1        | 4        | 2        | 3       | 2        | 2        | 3        | 0        | 3        | 1        | 3        | 0        | 1        | 2        |
| K08689 | 0        | 0        | 0        | 0        | 0        | 0        | 0        | 0        | 0       | 0        | 0        | 0        | 0        | 0        | 0        | 0        | 0        | 0        | 0        |
| K08710 | 0        | 0        | 0        | 0        | 0        | 0        | 0        | 0        | 0       | 0        | 0        | 0        | 0        | 0        | 0        | 0        | 0        | 1        | 0        |
| K09461 | 0        | 0        | 0        | 0        | 0        | 0        | 1        | 0        | 0       | 0        | 0        | 0        | 0        | 0        | 0        | 0        | 0        | 0        | 0        |
| K10217 | 0        | 0        | 0        | 0        | 0        | 0        | 0        | 0        | 0       | 0        | 0        | 0        | 0        | 0        | 0        | 0        | 0        | 0        | 0        |
| K10218 | 0        | 0        | 0        | 0        | 0        | 0        | 2        | 0        | 0       | 1        | 0        | 1        | 0        | 0        | 0        | 0        | 0        | 0        | 0        |
| K10220 | 0        | 0        | 0        | 0        | 0        | 0        | 0        | 0        | 0       | 0        | 0        | 0        | 0        | 0        | 0        | 0        | 0        | 0        | 0        |
| K11180 | 0        | 0        | 0        | 0        | 0        | 1        | 1        | 0        | 1       | 0        | 0        | 0        | 0        | 0        | 0        | 0        | 0        | 0        | 0        |
| K13953 | 0        | 0        | 0        | 0        | 0        | 0        | 0        | 0        | 2       | 0        | 0        | 0        | 0        | 0        | 0        | 0        | 0        | 0        | 0        |
| K14333 | 0        | 0        | 0        | 0        | 0        | 0        | 0        | 0        | 0       | 0        | 0        | 0        | 0        | 0        | 0        | 0        | 0        | 0        | 0        |
| K14519 | 0        | 0        | 0        | 0        | 0        | 0        | 0        | 0        | 0       | 0        | 0        | 0        | 0        | 0        | 0        | 0        | 0        | 0        | 0        |
| K15054 | 0        | 0        | 0        | 0        | 0        | 0        | 0        | 0        | 0       | 0        | 0        | 1        | 0        | 0        | 0        | 0        | 0        | 0        | 0        |
| K16173 | 0        | 0        | 0        | 0        | 0        | 2        | 0        | 0        | 0       | 0        | 0        | 0        | 0        | 0        | 0        | 0        | 0        | 0        | 0        |
| K16514 | 0        | 0        | 0        | 0        | 0        | 0        | 0        | 0        | 0       | 0        | 0        | 0        | 1        | 0        | 0        | 0        | 0        | 1        | 0        |
| K16874 | 0        | 0        | 0        | 0        | 0        | 0        | 0        | 0        | 0       | 0        | 0        | 0        | 1        | 0        | 0        | 0        | 0        | 0        | 0        |

| EC/KO       | DA-AD-8 | DA-AD-80 | DA-AD-81 | DA-AD-82 | DA-AD-83 | DA-AD-84 | DA-AD-85 | DA-AD-9 | ES-AD-1 | ES-AD-10 | ES-AD-11 | ES-AD-12 | ES-AD-13 | ES-AD-14 | ES-AD-15 | ES-AD-16 | ES-AD-17 | ES-AD-18 | ES-AD-19 |
|-------------|---------|----------|----------|----------|----------|----------|----------|---------|---------|----------|----------|----------|----------|----------|----------|----------|----------|----------|----------|
| 1.1.1.-     | 9       | 54       | 63       | 59       | 25       | 52       | 87       | 8       | 41      | 34       | 84       | 53       | 32       | 51       | 30       | 71       | 47       | 56       | 56       |
| 1.1.1.1     | 16      | 24       | 35       | 35       | 15       | 28       | 92       | 10      | 15      | 11       | 47       | 34       | 28       | 28       | 14       | 33       | 41       | 38       | 45       |
| 1.1.1.157   | 0       | 1        | 0        | 0        | 0        | 0        | 1        | 0       | 2       | 0        | 0        | 0        | 0        | 0        | 0        | 2        | 0        | 2        | 0        |
| 1.1.1.205   | 5       | 28       | 31       | 24       | 16       | 22       | 39       | 4       | 11      | 9        | 13       | 24       | 13       | 17       | 13       | 22       | 14       | 19       | 27       |
| 1.1.1.35    | 0       | 7        | 6        | 5        | 1        | 0        | 3        | 0       | 3       | 0        | 2        | 3        | 0        | 2        | 1        | 3        | 3        | 3        | 5        |
| 1.1.2.99.6  | 0       | 0        | 0        | 2        | 0        | 3        | 2        | 0       | 3       | 0        | 2        | 0        | 0        | 2        | 0        | 2        | 4        | 0        | 3        |
| 1.1.3.11.-  | 0       | 0        | 0        | 0        | 0        | 0        | 0        | 0       | 0       | 0        | 0        | 0        | 0        | 0        | 0        | 0        | 0        | 0        | 0        |
| 1.1.3.11.1  | 0       | 0        | 0        | 0        | 0        | 0        | 0        | 0       | 0       | 0        | 0        | 0        | 0        | 0        | 0        | 0        | 0        | 0        | 0        |
| 1.1.3.11.2  | 0       | 0        | 0        | 0        | 0        | 0        | 0        | 0       | 0       | 0        | 0        | 0        | 0        | 0        | 0        | 0        | 0        | 0        | 0        |
| 1.1.3.11.3  | 0       | 0        | 0        | 0        | 0        | 0        | 0        | 0       | 0       | 0        | 0        | 0        | 0        | 0        | 0        | 0        | 0        | 0        | 0        |
| 1.1.3.11.39 | 0       | 0        | 0        | 0        | 0        | 0        | 0        | 0       | 0       | 0        | 0        | 0        | 0        | 0        | 0        | 0        | 0        | 0        | 0        |
| 1.1.3.11.5  | 0       | 0        | 0        | 1        | 0        | 0        | 1        | 0       | 0       | 0        | 0        | 0        | 0        | 0        | 0        | 0        | 1        | 0        | 0        |
| 1.1.3.11.8  | 0       | 0        | 0        | 0        | 0        | 0        | 0        | 0       | 0       | 0        | 0        | 0        | 0        | 0        | 0        | 0        | 0        | 0        | 0        |
| 1.1.4.12.10 | 0       | 1        | 0        | 0        | 0        | 0        | 0        | 0       | 0       | 0        | 0        | 0        | 0        | 0        | 0        | 0        | 0        | 0        | 1        |
| 1.1.4.12.13 | 0       | 0        | 0        | 0        | 0        | 0        | 0        | 0       | 0       | 0        | 0        | 0        | 0        | 0        | 0        | 0        | 0        | 0        | 0        |
| 1.1.4.12.18 | 0       | 0        | 0        | 0        | 0        | 0        | 0        | 0       | 0       | 0        | 0        | 0        | 0        | 0        | 0        | 0        | 0        | 0        | 0        |
| 1.1.4.13.-  | 0       | 0        | 0        | 0        | 0        | 0        | 0        | 0       | 0       | 1        | 2        | 0        | 0        | 0        | 0        | 0        | 3        | 0        | 0        |
| 1.1.4.13.1  | 0       | 0        | 0        | 0        | 0        | 0        | 0        | 0       | 0       | 0        | 0        | 0        | 0        | 0        | 0        | 0        | 0        | 0        | 0        |
| 1.1.4.13.2  | 0       | 0        | 0        | 0        | 0        | 0        | 0        | 0       | 0       | 0        | 0        | 0        | 0        | 0        | 0        | 0        | 0        | 0        | 0        |
| 1.1.4.13.50 | 0       | 0        | 0        | 0        | 0        | 0        | 0        | 0       | 0       | 0        | 0        | 0        | 0        | 0        | 0        | 0        | 0        | 0        | 0        |
| 1.1.4.13.7  | 0       | 0        | 1        | 0        | 0        | 0        | 0        | 0       | 0       | 0        | 0        | 0        | 0        | 0        | 0        | 0        | 0        | 0        | 0        |
| 1.1.4.13.8  | 0       | 0        | 0        | 0        | 0        | 0        | 0        | 0       | 0       | 0        | 0        | 0        | 0        | 0        | 0        | 0        | 0        | 0        | 0        |
| 1.1.4.13.82 | 0       | 0        | 0        | 0        | 0        | 0        | 0        | 0       | 0       | 0        | 0        | 0        | 0        | 0        | 0        | 0        | 0        | 0        | 0        |
| 1.1.4.99.-  | 0       | 0        | 0        | 0        | 0        | 0        | 0        | 0       | 0       | 0        | 0        | 0        | 0        | 0        | 0        | 0        | 0        | 0        | 0        |
| 1.1.7.99.1  | 0       | 0        | 0        | 0        | 0        | 0        | 0        | 0       | 0       | 0        | 0        | 0        | 0        | 0        | 0        | 0        | 0        | 0        | 0        |
| 1.1.8.6.1   | 0       | 0        | 0        | 0        | 0        | 0        | 0        | 0       | 0       | 0        | 0        | 0        | 0        | 0        | 0        | 0        | 0        | 0        | 0        |
| 1.2.1.-     | 0       | 0        | 0        | 0        | 0        | 0        | 0        | 0       | 0       | 0        | 1        | 0        | 0        | 0        | 0        | 0        | 0        | 0        | 1        |
| 1.2.1.10    | 0       | 4        | 5        | 3        | 2        | 6        | 6        | 0       | 1       | 2        | 6        | 4        | 1        | 3        | 3        | 4        | 5        | 5        | 6        |
| 1.2.1.3     | 1       | 10       | 9        | 15       | 4        | 4        | 23       | 0       | 5       | 4        | 12       | 10       | 5        | 11       | 2        | 8        | 9        | 8        | 9        |
| 1.2.1.39    | 0       | 0        | 1        | 0        | 0        | 0        | 0        | 0       | 0       | 0        | 0        | 0        | 0        | 0        | 0        | 0        | 0        | 0        | 0        |
| 1.2.7.1     | 3       | 13       | 14       | 15       | 5        | 8        | 28       | 2       | 6       | 2        | 9        | 9        | 14       | 13       | 10       | 7        | 5        | 12       | 5        |
| 1.2.99.2    | 1       | 2        | 5        | 3        | 1        | 2        | 6        | 0       | 1       | 1        | 8        | 2        | 1        | 4        | 0        | 3        | 11       | 0        | 4        |
| 1.3.1.-     | 0       | 0        | 0        | 0        | 0        | 0        | 0        | 0       | 1       | 0        | 0        | 1        | 0        | 0        | 0        | 1        | 1        | 0        | 0        |
| 1.3.1.2     | 1       | 2        | 1        | 1        | 0        | 2        | 1        | 0       | 0       | 0        | 1        | 0        | 1        | 0        | 0        | 1        | 1        | 0        | 2        |
| 1.3.1.25    | 0       | 0        | 0        | 0        | 0        | 0        | 0        | 0       | 0       | 0        | 0        | 0        | 0        | 0        | 0        | 0        | 0        | 0        | 0        |
| 1.3.99.-    | 0       | 0        | 0        | 0        | 0        | 0        | 0        | 0       | 0       | 0        | 1        | 0        | 0        | 0        | 0        | 0        | 0        | 0        | 1        |
| 1.6.5.-     | 19      | 39       | 54       | 42       | 16       | 47       | 63       | 10      | 42      | 25       | 31       | 54       | 39       | 40       | 28       | 54       | 30       | 46       | 35       |
| 1.7.1.-     | 3       | 6        | 14       | 9        | 6        | 12       | 14       | 1       | 9       | 2        | 3        | 9        | 4        | 7        | 5        | 9        | 9        | 12       | 8        |
| 1.8.99.3    | 0       | 0        | 0        | 0        | 0        | 0        | 0        | 0       | 0       | 0        | 1        | 0        | 0        | 0        | 0        | 0        | 0        | 0        | 1        |
| 2.1.1.-     | 92      | 359      | 349      | 334      | 115      | 222      | 537      | 58      | 136     | 108      | 222      | 262      | 222      | 282      | 142      | 290      | 222      | 241      | 265      |
| 2.3.1.-     | 55      | 174      | 182      | 201      | 78       | 146      | 271      | 27      | 84      | 81       | 132      | 152      | 129      | 152      | 81       | 167      | 128      | 120      | 131      |
| 2.3.1.16    | 0       | 1        | 0        | 3        | 0        | 1        | 2        | 1       | 0       | 1        | 3        | 1        | 1        | 1        | 1        | 2        | 2        | 3        | 3        |
| 2.3.1.5     | 0       | 0        | 0        | 0        | 0        | 0        | 0        | 0       | 0       | 0        | 1        | 0        | 0        | 0        | 0        | 0        | 1        | 0        | 1        |
| 2.3.1.9     | 0       | 1        | 0        | 0        | 0        | 0        | 1        | 0       | 0       | 0        | 5        | 0        | 1        | 1        | 1        | 1        | 0        | 1        | 4        |
| 2.4.2.10    | 3       | 17       | 21       | 18       | 10       | 14       | 31       | 5       | 6       | 8        | 15       | 22       | 17       | 10       | 10       | 14       | 18       | 20       | 19       |
| 2.4.2.3     | 2       | 14       | 14       | 11       | 3        | 4        | 26       | 0       | 2       | 5        | 13       | 10       | 5        | 11       | 8        | 16       | 4        | 9        | 12       |
| 2.4.2.4     | 1       | 9        | 13       | 7        | 0        | 2        | 9        | 0       | 0       | 0        | 4        | 5        | 4        | 7        | 1        | 5        | 4        | 5        | 2        |
| 2.4.2.8     | 3       | 15       | 19       | 13       | 7        | 13       | 34       | 3       | 5       | 3        | 11       | 15       | 12       | 11       | 9        | 14       | 9        | 14       | 16       |
| 2.5.1.-     | 10      | 19       | 24       | 26       | 14       | 19       | 32       | 5       | 11      | 9        | 14       | 25       | 15       | 20       | 13       | 24       | 19       | 22       | 19       |

| EC/KO    | DA-AD-8 | DA-AD-80 | DA-AD-81 | DA-AD-82 | DA-AD-83 | DA-AD-84 | DA-AD-85 | DA-AD-9 | ES-AD-1 | ES-AD-10 | ES-AD-11 | ES-AD-12 | ES-AD-13 | ES-AD-14 | ES-AD-15 | ES-AD-16 | ES-AD-17 | ES-AD-18 | ES-AD-19 |
|----------|---------|----------|----------|----------|----------|----------|----------|---------|---------|----------|----------|----------|----------|----------|----------|----------|----------|----------|----------|
| 2.5.1.18 | 0       | 2        | 0        | 3        | 1        | 1        | 10       | 0       | 0       | 1        | 4        | 0        | 1        | 3        | 1        | 2        | 4        | 1        | 2        |
| 2.6.1.-  | 8       | 48       | 37       | 49       | 17       | 30       | 71       | 12      | 10      | 11       | 35       | 32       | 26       | 32       | 19       | 34       | 20       | 30       | 38       |
| 2.7.1.21 | 5       | 11       | 12       | 9        | 8        | 4        | 8        | 2       | 6       | 3        | 6        | 13       | 9        | 6        | 3        | 6        | 6        | 8        | 10       |
| 2.7.1.48 | 13      | 42       | 38       | 33       | 19       | 22       | 51       | 8       | 16      | 11       | 27       | 35       | 24       | 27       | 16       | 38       | 18       | 28       | 23       |
| 2.7.4.-  | 5       | 18       | 25       | 22       | 8        | 11       | 24       | 3       | 5       | 10       | 13       | 16       | 8        | 22       | 10       | 15       | 19       | 20       | 10       |
| 2.8.3.-  | 0       | 3        | 0        | 2        | 1        | 2        | 2        | 0       | 0       | 1        | 3        | 2        | 0        | 1        | 1        | 3        | 3        | 1        | 2        |
| 2.8.3.1  | 0       | 0        | 0        | 0        | 0        | 0        | 1        | 0       | 1       | 0        | 2        | 0        | 0        | 1        | 0        | 0        | 1        | 0        | 0        |
| 2.8.3.12 | 0       | 1        | 0        | 0        | 1        | 2        | 1        | 0       | 4       | 0        | 0        | 1        | 0        | 0        | 1        | 1        | 0        | 0        | 2        |
| 2.8.3.6  | 0       | 0        | 1        | 0        | 0        | 0        | 0        | 0       | 0       | 0        | 0        | 1        | 0        | 1        | 0        | 1        | 0        | 2        | 0        |
| 2.8.3.8  | 0       | 2        | 1        | 2        | 0        | 0        | 3        | 0       | 1       | 1        | 6        | 2        | 1        | 2        | 1        | 0        | 2        | 1        | 3        |
| 3.1.1.-  | 3       | 10       | 8        | 8        | 4        | 6        | 5        | 0       | 5       | 6        | 10       | 5        | 7        | 4        | 2        | 7        | 4        | 6        | 7        |
| 3.1.1.1  | 2       | 4        | 6        | 8        | 7        | 7        | 7        | 0       | 4       | 4        | 8        | 9        | 0        | 5        | 6        | 12       | 6        | 6        | 5        |
| 3.1.1.17 | 0       | 1        | 1        | 3        | 1        | 2        | 1        | 0       | 2       | 1        | 3        | 4        | 0        | 1        | 0        | 2        | 0        | 0        | 0        |
| 3.1.1.2  | 0       | 0        | 1        | 0        | 0        | 0        | 1        | 0       | 0       | 0        | 2        | 0        | 0        | 0        | 0        | 0        | 1        | 0        | 3        |
| 3.1.1.24 | 1       | 6        | 8        | 5        | 0        | 1        | 8        | 0       | 3       | 1        | 3        | 4        | 2        | 6        | 1        | 3        | 5        | 4        | 3        |
| 3.1.1.45 | 0       | 0        | 0        | 0        | 0        | 0        | 0        | 0       | 0       | 0        | 1        | 0        | 0        | 0        | 0        | 0        | 1        | 0        | 0        |
| 3.1.2.-  | 0       | 0        | 0        | 0        | 0        | 0        | 2        | 0       | 1       | 0        | 1        | 0        | 0        | 1        | 0        | 1        | 3        | 0        | 1        |
| 3.1.2.23 | 5       | 4        | 8        | 8        | 5        | 7        | 7        | 2       | 4       | 3        | 3        | 8        | 6        | 2        | 3        | 8        | 4        | 3        | 3        |
| 3.1.3.1  | 5       | 12       | 8        | 21       | 12       | 27       | 14       | 3       | 14      | 6        | 7        | 18       | 8        | 12       | 7        | 15       | 13       | 16       | 9        |
| 3.1.3.2  | 3       | 1        | 5        | 4        | 6        | 7        | 5        | 2       | 2       | 4        | 1        | 9        | 2        | 3        | 2        | 3        | 4        | 7        | 3        |
| 3.1.3.41 | 0       | 0        | 0        | 0        | 0        | 0        | 1        | 0       | 0       | 0        | 0        | 0        | 0        | 0        | 0        | 0        | 0        | 0        | 0        |
| 3.2.1.31 | 0       | 8        | 4        | 5        | 1        | 7        | 4        | 0       | 3       | 0        | 6        | 3        | 1        | 8        | 5        | 5        | 7        | 4        | 2        |
| 3.3.2.9  | 0       | 0        | 0        | 0        | 0        | 0        | 0        | 0       | 0       | 0        | 0        | 0        | 0        | 0        | 0        | 0        | 0        | 0        | 0        |
| 3.5.1.-  | 7       | 33       | 40       | 35       | 9        | 16       | 41       | 8       | 4       | 6        | 20       | 28       | 21       | 27       | 8        | 27       | 18       | 25       | 21       |
| 3.5.1.4  | 3       | 2        | 5        | 3        | 2        | 3        | 4        | 1       | 0       | 1        | 2        | 2        | 4        | 2        | 2        | 4        | 6        | 2        | 7        |
| 3.5.1.5  | 0       | 1        | 3        | 2        | 0        | 2        | 5        | 0       | 0       | 0        | 0        | 2        | 0        | 0        | 0        | 1        | 0        | 0        | 0        |
| 3.5.1.54 | 0       | 6        | 2        | 5        | 3        | 4        | 10       | 0       | 1       | 0        | 5        | 2        | 4        | 10       | 4        | 5        | 4        | 3        | 12       |
| 3.5.1.6  | 1       | 0        | 1        | 1        | 1        | 2        | 3        | 0       | 0       | 1        | 2        | 0        | 1        | 2        | 1        | 0        | 1        | 2        | 2        |
| 3.5.2.-  | 0       | 0        | 0        | 0        | 0        | 0        | 0        | 0       | 0       | 0        | 0        | 0        | 0        | 1        | 0        | 0        | 0        | 0        | 0        |
| 3.5.2.2  | 1       | 2        | 0        | 3        | 1        | 2        | 3        | 0       | 0       | 1        | 2        | 1        | 1        | 2        | 1        | 0        | 1        | 0        | 4        |
| 3.5.4.-  | 12      | 36       | 38       | 33       | 16       | 20       | 51       | 6       | 13      | 9        | 18       | 24       | 26       | 27       | 9        | 32       | 18       | 28       | 17       |
| 3.5.4.5  | 4       | 23       | 23       | 17       | 6        | 12       | 26       | 3       | 4       | 3        | 10       | 16       | 10       | 10       | 7        | 12       | 12       | 10       | 10       |
| 3.5.5.1  | 0       | 2        | 0        | 4        | 1        | 2        | 3        | 0       | 0       | 1        | 3        | 3        | 2        | 0        | 0        | 1        | 1        | 0        | 3        |
| 3.5.5.7  | 0       | 0        | 0        | 0        | 0        | 0        | 0        | 0       | 0       | 0        | 0        | 0        | 0        | 0        | 0        | 0        | 0        | 0        | 0        |
| 3.5.99.3 | 0       | 0        | 0        | 0        | 0        | 0        | 0        | 0       | 0       | 1        | 0        | 0        | 0        | 0        | 0        | 0        | 0        | 0        | 0        |
| 3.6.1.7  | 1       | 5        | 7        | 6        | 2        | 0        | 17       | 0       | 1       | 2        | 2        | 0        | 4        | 5        | 2        | 7        | 4        | 2        | 5        |
| 3.7.1.-  | 0       | 1        | 0        | 1        | 0        | 0        | 6        | 0       | 1       | 0        | 2        | 2        | 1        | 3        | 2        | 4        | 2        | 3        | 4        |
| 3.7.1.2  | 2       | 5        | 4        | 5        | 3        | 5        | 6        | 1       | 3       | 4        | 2        | 3        | 0        | 3        | 0        | 5        | 2        | 2        | 2        |
| 3.8.1.2  | 2       | 6        | 4        | 3        | 2        | 8        | 9        | 2       | 9       | 2        | 6        | 5        | 2        | 3        | 3        | 5        | 4        | 3        | 8        |
| 3.8.1.3  | 0       | 0        | 0        | 0        | 0        | 0        | 0        | 0       | 0       | 0        | 0        | 0        | 0        | 0        | 0        | 0        | 0        | 0        | 0        |
| 3.8.1.5  | 0       | 0        | 0        | 0        | 1        | 0        | 1        | 0       | 1       | 0        | 2        | 0        | 0        | 2        | 0        | 1        | 1        | 1        | 3        |
| 4.1.1.-  | 5       | 9        | 9        | 9        | 4        | 11       | 18       | 2       | 7       | 2        | 9        | 9        | 4        | 7        | 5        | 16       | 13       | 7        | 12       |
| 4.1.1.44 | 11      | 22       | 28       | 34       | 15       | 22       | 42       | 10      | 32      | 11       | 18       | 34       | 7        | 22       | 15       | 33       | 18       | 22       | 22       |
| 4.1.1.55 | 0       | 0        | 0        | 0        | 0        | 0        | 0        | 0       | 0       | 0        | 0        | 0        | 0        | 0        | 0        | 0        | 0        | 0        | 0        |
| 4.1.1.7  | 0       | 0        | 0        | 0        | 0        | 0        | 0        | 0       | 0       | 0        | 0        | 0        | 0        | 0        | 0        | 0        | 0        | 0        | 0        |
| 4.1.1.70 | 0       | 0        | 0        | 1        | 0        | 0        | 0        | 0       | 1       | 0        | 1        | 0        | 0        | 1        | 0        | 0        | 0        | 0        | 0        |
| 4.1.1.77 | 0       | 0        | 0        | 0        | 0        | 0        | 0        | 0       | 0       | 0        | 0        | 0        | 0        | 0        | 0        | 0        | 0        | 0        | 0        |
| 4.1.2.-  | 1       | 6        | 3        | 6        | 3        | 3        | 10       | 0       | 5       | 1        | 14       | 9        | 6        | 7        | 5        | 7        | 10       | 8        | 11       |
| 4.1.3.-  | 7       | 19       | 24       | 28       | 13       | 18       | 46       | 3       | 9       | 8        | 13       | 12       | 14       | 22       | 8        | 18       | 15       | 13       | 17       |

| EC/KO    | DA-AD-8 | DA-AD-80 | DA-AD-81 | DA-AD-82 | DA-AD-83 | DA-AD-84 | DA-AD-85 | DA-AD-9 | ES-AD-1 | ES-AD-10 | ES-AD-11 | ES-AD-12 | ES-AD-13 | ES-AD-14 | ES-AD-15 | ES-AD-16 | ES-AD-17 | ES-AD-18 | ES-AD-19 |
|----------|---------|----------|----------|----------|----------|----------|----------|---------|---------|----------|----------|----------|----------|----------|----------|----------|----------|----------|----------|
| 4.1.3.39 | 0       | 1        | 0        | 1        | 0        | 0        | 1        | 0       | 0       | 0        | 1        | 0        | 0        | 0        | 0        | 0        | 0        | 0        | 1        |
| 4.1.99.- | 0       | 1        | 3        | 1        | 0        | 2        | 3        | 3       | 0       | 0        | 2        | 0        | 1        | 1        | 1        | 2        | 0        | 0        | 2        |
| 4.2.1.-  | 7       | 55       | 53       | 59       | 28       | 58       | 86       | 10      | 26      | 23       | 44       | 51       | 29       | 56       | 23       | 58       | 36       | 32       | 39       |
| 4.2.1.17 | 2       | 7        | 6        | 3        | 3        | 4        | 11       | 2       | 3       | 1        | 4        | 3        | 4        | 7        | 4        | 6        | 1        | 6        | 5        |
| 4.2.1.80 | 0       | 0        | 0        | 0        | 0        | 0        | 0        | 0       | 0       | 0        | 0        | 0        | 0        | 0        | 0        | 0        | 0        | 0        | 0        |
| 4.2.1.83 | 0       | 0        | 0        | 1        | 2        | 0        | 0        | 0       | 0       | 0        | 0        | 2        | 0        | 0        | 0        | 0        | 0        | 2        | 0        |
| 4.2.1.84 | 0       | 0        | 0        | 1        | 1        | 0        | 1        | 0       | 0       | 0        | 0        | 0        | 0        | 0        | 0        | 0        | 0        | 0        | 1        |
| 5.1.2.2  | 0       | 0        | 0        | 0        | 0        | 0        | 0        | 0       | 0       | 0        | 0        | 0        | 0        | 0        | 0        | 0        | 0        | 0        | 0        |
| 5.2.1.2  | 0       | 0        | 0        | 0        | 0        | 0        | 0        | 0       | 0       | 0        | 0        | 0        | 0        | 0        | 0        | 0        | 0        | 0        | 0        |
| 5.3.3.4  | 0       | 0        | 0        | 0        | 0        | 0        | 0        | 0       | 0       | 0        | 0        | 0        | 0        | 0        | 0        | 0        | 0        | 0        | 0        |
| 5.3.99.- | 1       | 3        | 2        | 5        | 2        | 2        | 3        | 0       | 3       | 1        | 5        | 3        | 1        | 3        | 1        | 4        | 0        | 1        | 4        |
| 5.4.99.- | 0       | 2        | 0        | 2        | 0        | 1        | 0        | 0       | 0       | 0        | 0        | 0        | 2        | 0        | 0        | 1        | 0        | 1        | 0        |
| 5.5.1.1  | 1       | 1        | 4        | 4        | 0        | 2        | 3        | 0       | 1       | 1        | 5        | 4        | 2        | 1        | 2        | 3        | 4        | 1        | 1        |
| 5.5.1.2  | 0       | 0        | 0        | 0        | 0        | 0        | 0        | 0       | 0       | 0        | 0        | 0        | 0        | 0        | 0        | 0        | 0        | 0        | 0        |
| 6.2.1.-  | 0       | 0        | 0        | 0        | 0        | 0        | 0        | 0       | 0       | 0        | 0        | 0        | 0        | 0        | 0        | 0        | 0        | 0        | 0        |
| 6.3.5.2  | 3       | 17       | 21       | 28       | 11       | 17       | 38       | 2       | 11      | 5        | 21       | 17       | 8        | 13       | 9        | 23       | 17       | 24       | 12       |
| K00002   | 0       | 4        | 1        | 3        | 0        | 1        | 5        | 0       | 0       | 1        | 2        | 2        | 4        | 1        | 2        | 1        | 2        | 0        | 1        |
| K00055   | 0       | 0        | 0        | 1        | 0        | 0        | 0        | 0       | 0       | 0        | 1        | 0        | 0        | 0        | 1        | 0        | 0        | 0        | 3        |
| K00074   | 0       | 9        | 6        | 9        | 1        | 1        | 5        | 0       | 8       | 1        | 7        | 4        | 2        | 5        | 3        | 3        | 6        | 8        | 6        |
| K00088   | 5       | 21       | 18       | 19       | 9        | 16       | 27       | 3       | 10      | 8        | 16       | 13       | 14       | 13       | 11       | 16       | 10       | 19       | 16       |
| K00100   | 16      | 44       | 61       | 67       | 28       | 42       | 96       | 12      | 29      | 22       | 62       | 54       | 30       | 50       | 23       | 66       | 51       | 40       | 72       |
| K00128   | 0       | 2        | 5        | 2        | 0        | 1        | 5        | 0       | 1       | 0        | 5        | 3        | 0        | 2        | 0        | 1        | 3        | 4        | 3        |
| K00129   | 0       | 0        | 0        | 0        | 0        | 0        | 0        | 0       | 0       | 0        | 0        | 0        | 0        | 0        | 0        | 0        | 0        | 0        | 0        |
| K00132   | 0       | 0        | 0        | 0        | 0        | 0        | 0        | 0       | 0       | 1        | 2        | 1        | 0        | 1        | 0        | 0        | 0        | 0        | 0        |
| K00141   | 0       | 0        | 0        | 0        | 0        | 0        | 0        | 0       | 0       | 0        | 0        | 0        | 0        | 0        | 0        | 0        | 0        | 0        | 0        |
| K00146   | 0       | 0        | 0        | 0        | 0        | 0        | 0        | 0       | 0       | 0        | 0        | 0        | 0        | 0        | 0        | 0        | 0        | 0        | 0        |
| K00148   | 0       | 0        | 0        | 0        | 0        | 0        | 0        | 0       | 0       | 0        | 0        | 0        | 0        | 0        | 0        | 0        | 0        | 0        | 0        |
| K00155   | 0       | 0        | 1        | 0        | 0        | 1        | 0        | 0       | 0       | 0        | 1        | 0        | 0        | 0        | 0        | 1        | 0        | 0        | 1        |
| K00169   | 0       | 1        | 4        | 1        | 0        | 2        | 7        | 0       | 0       | 0        | 3        | 0        | 4        | 2        | 1        | 1        | 1        | 2        | 2        |
| K00224   | 0       | 0        | 1        | 0        | 1        | 1        | 1        | 0       | 0       | 0        | 0        | 0        | 0        | 1        | 0        | 1        | 1        | 0        | 1        |
| K00274   | 0       | 0        | 0        | 0        | 0        | 0        | 0        | 0       | 0       | 0        | 0        | 0        | 0        | 0        | 0        | 0        | 0        | 0        | 0        |
| K00446   | 0       | 0        | 0        | 0        | 0        | 0        | 0        | 0       | 0       | 0        | 0        | 0        | 0        | 0        | 0        | 0        | 0        | 0        | 0        |
| K00448   | 0       | 0        | 0        | 0        | 0        | 0        | 0        | 0       | 0       | 0        | 0        | 0        | 0        | 0        | 0        | 0        | 0        | 0        | 0        |
| K00462   | 0       | 1        | 1        | 2        | 0        | 0        | 1        | 0       | 1       | 0        | 1        | 0        | 0        | 0        | 2        | 2        | 0        | 0        | 1        |
| K00480   | 0       | 0        | 0        | 0        | 0        | 0        | 0        | 0       | 0       | 0        | 0        | 0        | 0        | 0        | 0        | 0        | 0        | 0        | 0        |
| K00481   | 0       | 0        | 0        | 0        | 0        | 0        | 0        | 0       | 0       | 0        | 0        | 0        | 0        | 0        | 0        | 0        | 0        | 0        | 0        |
| K00539   | 0       | 1        | 2        | 2        | 0        | 0        | 2        | 0       | 0       | 0        | 1        | 1        | 0        | 3        | 0        | 0        | 0        | 1        | 1        |
| K00599   | 19      | 48       | 67       | 48       | 22       | 37       | 97       | 14      | 16      | 21       | 30       | 38       | 39       | 53       | 28       | 62       | 22       | 48       | 58       |
| K00626   | 0       | 2        | 0        | 6        | 0        | 1        | 4        | 2       | 1       | 3        | 8        | 1        | 3        | 3        | 4        | 3        | 2        | 6        | 8        |
| K00632   | 0       | 0        | 0        | 0        | 0        | 0        | 0        | 0       | 0       | 0        | 1        | 0        | 0        | 0        | 0        | 0        | 0        | 0        | 0        |
| K00680   | 12      | 43       | 50       | 54       | 19       | 33       | 71       | 11      | 20      | 17       | 45       | 40       | 22       | 34       | 17       | 63       | 34       | 42       | 29       |
| K00757   | 5       | 9        | 10       | 13       | 8        | 11       | 27       | 2       | 9       | 4        | 10       | 17       | 6        | 12       | 9        | 14       | 11       | 9        | 10       |
| K00758   | 0       | 8        | 5        | 6        | 0        | 0        | 7        | 1       | 0       | 0        | 4        | 4        | 1        | 5        | 5        | 2        | 2        | 3        | 1        |
| K00760   | 10      | 26       | 35       | 25       | 12       | 20       | 50       | 5       | 10      | 6        | 15       | 22       | 24       | 22       | 17       | 24       | 19       | 18       | 22       |
| K00799   | 0       | 0        | 0        | 1        | 0        | 0        | 0        | 0       | 0       | 0        | 2        | 0        | 0        | 0        | 0        | 0        | 2        | 0        | 0        |
| K00857   | 7       | 22       | 18       | 14       | 9        | 6        | 15       | 3       | 6       | 4        | 7        | 14       | 14       | 10       | 6        | 12       | 10       | 15       | 13       |
| K00876   | 13      | 43       | 37       | 23       | 15       | 19       | 45       | 7       | 10      | 14       | 21       | 35       | 22       | 23       | 15       | 28       | 19       | 28       | 24       |
| K01026   | 0       | 0        | 0        | 4        | 0        | 0        | 2        | 0       | 0       | 0        | 6        | 1        | 1        | 0        | 0        | 0        | 0        | 0        | 2        |
| K01031   | 0       | 0        | 0        | 0        | 0        | 0        | 0        | 0       | 0       | 0        | 0        | 0        | 0        | 0        | 0        | 0        | 0        | 0        | 0        |

| EC/KO  | DA-AD-8 | DA-AD-80 | DA-AD-81 | DA-AD-82 | DA-AD-83 | DA-AD-84 | DA-AD-85 | DA-AD-9 | ES-AD-1 | ES-AD-10 | ES-AD-11 | ES-AD-12 | ES-AD-13 | ES-AD-14 | ES-AD-15 | ES-AD-16 | ES-AD-17 | ES-AD-18 | ES-AD-19 |
|--------|---------|----------|----------|----------|----------|----------|----------|---------|---------|----------|----------|----------|----------|----------|----------|----------|----------|----------|----------|
| K01034 | 0       | 1        | 0        | 3        | 0        | 0        | 2        | 0       | 1       | 1        | 0        | 0        | 2        | 0        | 1        | 0        | 1        | 3        | 0        |
| K01039 | 0       | 0        | 0        | 1        | 0        | 0        | 0        | 0       | 0       | 1        | 1        | 1        | 0        | 2        | 2        | 0        | 1        | 1        | 0        |
| K01041 | 2       | 1        | 8        | 6        | 4        | 5        | 5        | 3       | 6       | 3        | 0        | 8        | 3        | 2        | 2        | 3        | 4        | 4        | 2        |
| K01053 | 0       | 0        | 0        | 1        | 0        | 0        | 0        | 0       | 0       | 0        | 2        | 0        | 0        | 0        | 0        | 0        | 0        | 0        | 0        |
| K01055 | 0       | 0        | 0        | 0        | 0        | 0        | 0        | 0       | 0       | 0        | 0        | 0        | 0        | 0        | 0        | 0        | 0        | 0        | 0        |
| K01061 | 0       | 0        | 0        | 0        | 0        | 0        | 1        | 0       | 0       | 0        | 1        | 0        | 0        | 0        | 0        | 0        | 2        | 0        | 0        |
| K01066 | 4       | 5        | 8        | 10       | 3        | 5        | 15       | 0       | 2       | 3        | 8        | 8        | 1        | 4        | 5        | 11       | 9        | 6        | 3        |
| K01075 | 0       | 0        | 1        | 2        | 2        | 1        | 1        | 0       | 1       | 0        | 1        | 1        | 0        | 0        | 0        | 1        | 1        | 1        | 1        |
| K01077 | 1       | 6        | 8        | 12       | 4        | 19       | 11       | 1       | 6       | 4        | 4        | 6        | 2        | 9        | 6        | 9        | 9        | 6        | 4        |
| K01101 | 1       | 9        | 4        | 7        | 2        | 0        | 7        | 0       | 0       | 1        | 7        | 3        | 6        | 1        | 4        | 6        | 4        | 4        | 6        |
| K01195 | 1       | 9        | 6        | 10       | 2        | 12       | 13       | 1       | 1       | 4        | 9        | 8        | 5        | 8        | 9        | 16       | 8        | 5        | 3        |
| K01426 | 0       | 1        | 0        | 0        | 0        | 1        | 2        | 0       | 0       | 0        | 4        | 0        | 0        | 1        | 0        | 0        | 1        | 0        | 2        |
| K01428 | 0       | 0        | 1        | 0        | 0        | 1        | 2        | 0       | 0       | 0        | 1        | 0        | 0        | 1        | 0        | 1        | 0        | 0        | 0        |
| K01457 | 0       | 3        | 0        | 0        | 0        | 0        | 0        | 0       | 0       | 0        | 0        | 0        | 0        | 0        | 0        | 1        | 0        | 0        | 0        |
| K01464 | 1       | 2        | 0        | 4        | 1        | 3        | 4        | 0       | 0       | 1        | 9        | 1        | 1        | 3        | 0        | 0        | 3        | 0        | 6        |
| K01489 | 5       | 30       | 24       | 23       | 8        | 12       | 29       | 6       | 5       | 6        | 15       | 22       | 21       | 20       | 12       | 19       | 19       | 17       | 11       |
| K01500 | 0       | 0        | 0        | 0        | 0        | 0        | 0        | 0       | 0       | 0        | 0        | 0        | 0        | 0        | 0        | 0        | 0        | 0        | 0        |
| K01501 | 0       | 4        | 0        | 6        | 2        | 1        | 4        | 0       | 0       | 2        | 5        | 5        | 4        | 1        | 2        | 0        | 1        | 2        | 3        |
| K01502 | 0       | 0        | 0        | 0        | 0        | 0        | 1        | 0       | 0       | 0        | 0        | 0        | 0        | 0        | 0        | 0        | 0        | 0        | 0        |
| K01512 | 3       | 7        | 12       | 9        | 3        | 2        | 25       | 2       | 1       | 3        | 3        | 2        | 5        | 12       | 7        | 11       | 6        | 4        | 12       |
| K01560 | 0       | 6        | 2        | 8        | 2        | 2        | 14       | 0       | 3       | 1        | 5        | 6        | 5        | 7        | 3        | 5        | 10       | 3        | 4        |
| K01561 | 0       | 0        | 1        | 0        | 0        | 0        | 0        | 0       | 0       | 0        | 0        | 0        | 0        | 1        | 0        | 2        | 0        | 1        | 1        |
| K01563 | 0       | 0        | 0        | 0        | 0        | 0        | 0        | 0       | 0       | 0        | 0        | 0        | 0        | 0        | 0        | 0        | 0        | 0        | 0        |
| K01564 | 0       | 1        | 1        | 3        | 0        | 1        | 1        | 0       | 0       | 3        | 1        | 1        | 1        | 0        | 1        | 4        | 2        | 2        | 2        |
| K01607 | 6       | 13       | 12       | 13       | 7        | 9        | 14       | 3       | 16      | 4        | 12       | 17       | 3        | 8        | 6        | 13       | 9        | 11       | 7        |
| K01612 | 0       | 0        | 0        | 0        | 0        | 0        | 0        | 0       | 0       | 0        | 0        | 0        | 0        | 0        | 0        | 0        | 0        | 0        | 0        |
| K01615 | 5       | 12       | 16       | 15       | 5        | 9        | 20       | 1       | 8       | 2        | 16       | 7        | 12       | 11       | 12       | 11       | 12       | 7        | 12       |
| K01617 | 0       | 0        | 0        | 0        | 0        | 0        | 0        | 0       | 0       | 0        | 0        | 0        | 0        | 0        | 0        | 0        | 0        | 0        | 0        |
| K01666 | 4       | 8        | 7        | 11       | 2        | 5        | 11       | 1       | 0       | 1        | 3        | 1        | 2        | 8        | 1        | 5        | 2        | 4        | 6        |
| K01692 | 0       | 0        | 0        | 1        | 0        | 0        | 1        | 0       | 0       | 0        | 1        | 1        | 0        | 0        | 0        | 0        | 0        | 0        | 0        |
| K01721 | 0       | 0        | 0        | 0        | 0        | 0        | 0        | 0       | 0       | 0        | 0        | 0        | 0        | 0        | 0        | 0        | 0        | 0        | 0        |
| K01726 | 3       | 3        | 9        | 6        | 6        | 9        | 12       | 3       | 5       | 6        | 4        | 9        | 6        | 8        | 1        | 5        | 4        | 6        | 7        |
| K01781 | 0       | 0        | 0        | 0        | 0        | 2        | 0        | 0       | 0       | 1        | 2        | 0        | 0        | 0        | 0        | 0        | 0        | 0        | 2        |
| K01821 | 0       | 1        | 2        | 2        | 0        | 1        | 4        | 0       | 2       | 2        | 1        | 2        | 1        | 2        | 1        | 2        | 2        | 3        | 9        |
| K01856 | 0       | 0        | 0        | 0        | 0        | 0        | 0        | 0       | 0       | 0        | 1        | 0        | 0        | 0        | 0        | 0        | 0        | 0        | 0        |
| K01857 | 0       | 0        | 1        | 0        | 0        | 0        | 0        | 0       | 0       | 0        | 0        | 0        | 0        | 0        | 0        | 1        | 0        | 0        | 1        |
| K01913 | 0       | 0        | 1        | 1        | 1        | 0        | 1        | 0       | 0       | 0        | 0        | 0        | 0        | 0        | 0        | 0        | 1        | 0        | 1        |
| K01951 | 2       | 16       | 12       | 14       | 8        | 11       | 19       | 2       | 7       | 4        | 19       | 13       | 11       | 9        | 9        | 14       | 10       | 18       | 11       |
| K02554 | 0       | 0        | 0        | 0        | 0        | 0        | 0        | 0       | 0       | 0        | 0        | 0        | 0        | 0        | 0        | 0        | 0        | 0        | 0        |
| K03381 | 0       | 0        | 0        | 0        | 0        | 0        | 0        | 0       | 0       | 0        | 0        | 0        | 0        | 0        | 0        | 0        | 0        | 0        | 0        |
| K03382 | 0       | 0        | 0        | 1        | 0        | 1        | 0        | 0       | 0       | 1        | 2        | 1        | 1        | 0        | 0        | 0        | 2        | 0        | 0        |
| K03464 | 0       | 0        | 0        | 0        | 0        | 0        | 0        | 0       | 0       | 0        | 0        | 0        | 0        | 0        | 0        | 0        | 0        | 0        | 0        |
| K03518 | 4       | 8        | 4        | 11       | 3        | 6        | 27       | 0       | 6       | 4        | 22       | 12       | 9        | 12       | 4        | 9        | 11       | 3        | 14       |
| K03862 | 0       | 0        | 0        | 0        | 0        | 0        | 0        | 0       | 0       | 0        | 0        | 0        | 0        | 0        | 0        | 0        | 0        | 0        | 0        |
| K04099 | 0       | 0        | 0        | 0        | 0        | 0        | 0        | 0       | 0       | 0        | 0        | 0        | 0        | 0        | 0        | 0        | 0        | 0        | 0        |
| K04100 | 0       | 0        | 0        | 0        | 0        | 0        | 0        | 0       | 0       | 0        | 0        | 0        | 0        | 0        | 0        | 0        | 0        | 0        | 0        |
| K04102 | 0       | 0        | 0        | 0        | 0        | 0        | 0        | 0       | 0       | 0        | 0        | 0        | 0        | 0        | 0        | 0        | 0        | 0        | 0        |
| K04116 | 0       | 0        | 0        | 0        | 0        | 0        | 0        | 0       | 0       | 0        | 0        | 0        | 0        | 0        | 0        | 0        | 0        | 0        | 0        |
| K05394 | 0       | 0        | 0        | 0        | 0        | 1        | 2        | 0       | 0       | 0        | 0        | 0        | 0        | 1        | 1        | 1        | 2        | 0        | 1        |

| EC/KO  | DA-AD-8 | DA-AD-80 | DA-AD-81 | DA-AD-82 | DA-AD-83 | DA-AD-84 | DA-AD-85 | DA-AD-9 | ES-AD-1 | ES-AD-10 | ES-AD-11 | ES-AD-12 | ES-AD-13 | ES-AD-14 | ES-AD-15 | ES-AD-16 | ES-AD-17 | ES-AD-18 | ES-AD-19 |
|--------|---------|----------|----------|----------|----------|----------|----------|---------|---------|----------|----------|----------|----------|----------|----------|----------|----------|----------|----------|
| K05549 | 0       | 0        | 0        | 0        | 0        | 0        | 0        | 0       | 0       | 0        | 0        | 0        | 0        | 0        | 0        | 0        | 0        | 0        | 0        |
| K05783 | 0       | 0        | 0        | 0        | 0        | 0        | 0        | 0       | 0       | 0        | 0        | 0        | 0        | 0        | 0        | 0        | 0        | 0        | 0        |
| K05797 | 0       | 0        | 0        | 0        | 0        | 0        | 0        | 0       | 0       | 0        | 0        | 0        | 0        | 0        | 0        | 0        | 0        | 0        | 0        |
| K06281 | 0       | 0        | 0        | 2        | 0        | 0        | 2        | 0       | 1       | 0        | 1        | 0        | 0        | 2        | 0        | 1        | 2        | 1        | 3        |
| K06446 | 2       | 7        | 2        | 5        | 4        | 6        | 7        | 1       | 5       | 5        | 5        | 4        | 3        | 1        | 2        | 5        | 2        | 4        | 8        |
| K06912 | 0       | 0        | 0        | 0        | 0        | 0        | 0        | 0       | 0       | 0        | 0        | 0        | 0        | 0        | 0        | 0        | 0        | 0        | 0        |
| K07535 | 0       | 0        | 0        | 0        | 0        | 0        | 0        | 0       | 0       | 0        | 0        | 0        | 0        | 0        | 0        | 0        | 0        | 0        | 0        |
| K07536 | 0       | 2        | 2        | 3        | 1        | 1        | 0        | 0       | 2       | 1        | 2        | 4        | 2        | 2        | 2        | 0        | 4        | 2        | 2        |
| K08689 | 0       | 0        | 0        | 0        | 0        | 0        | 0        | 0       | 0       | 0        | 0        | 0        | 0        | 0        | 0        | 0        | 0        | 0        | 0        |
| K08710 | 0       | 0        | 0        | 0        | 0        | 0        | 0        | 0       | 0       | 0        | 1        | 0        | 0        | 0        | 0        | 0        | 0        | 0        | 1        |
| K09461 | 0       | 0        | 0        | 0        | 0        | 0        | 0        | 0       | 0       | 0        | 0        | 0        | 0        | 0        | 0        | 0        | 0        | 0        | 0        |
| K10217 | 0       | 0        | 0        | 0        | 0        | 0        | 0        | 0       | 0       | 0        | 0        | 0        | 0        | 0        | 0        | 0        | 0        | 0        | 0        |
| K10218 | 0       | 0        | 0        | 2        | 0        | 1        | 0        | 0       | 0       | 0        | 3        | 1        | 1        | 0        | 0        | 1        | 0        | 0        | 0        |
| K10220 | 0       | 0        | 0        | 0        | 0        | 0        | 0        | 0       | 0       | 0        | 0        | 0        | 0        | 0        | 0        | 0        | 0        | 0        | 0        |
| K11180 | 0       | 0        | 0        | 0        | 0        | 0        | 0        | 0       | 0       | 0        | 0        | 0        | 0        | 0        | 0        | 1        | 1        | 0        | 1        |
| K13953 | 0       | 0        | 0        | 0        | 0        | 0        | 2        | 0       | 0       | 0        | 1        | 1        | 1        | 1        | 0        | 0        | 2        | 0        | 4        |
| K14333 | 0       | 0        | 0        | 0        | 0        | 0        | 0        | 0       | 0       | 0        | 0        | 0        | 0        | 0        | 0        | 0        | 0        | 0        | 0        |
| K14519 | 0       | 0        | 0        | 0        | 0        | 0        | 0        | 0       | 0       | 0        | 0        | 0        | 0        | 0        | 0        | 0        | 0        | 0        | 0        |
| K15054 | 0       | 0        | 0        | 0        | 0        | 0        | 0        | 0       | 0       | 0        | 1        | 0        | 0        | 0        | 0        | 0        | 0        | 0        | 0        |
| K16173 | 0       | 0        | 0        | 1        | 0        | 0        | 2        | 0       | 0       | 0        | 1        | 0        | 1        | 0        | 0        | 0        | 1        | 0        | 2        |
| K16514 | 0       | 0        | 0        | 0        | 0        | 0        | 0        | 0       | 0       | 0        | 0        | 0        | 0        | 0        | 1        | 0        | 0        | 0        | 1        |
| K16874 | 1       | 1        | 0        | 0        | 0        | 0        | 0        | 0       | 0       | 0        | 0        | 0        | 0        | 0        | 0        | 0        | 0        | 0        | 0        |

| EC/KO      | ES-AD-2 | ES-AD-20 | ES-AD-21 | ES-AD-22 | ES-AD-23 | ES-AD-24 | ES-AD-25 | ES-AD-26 | ES-AD-27 | ES-AD-28 | ES-AD-29 | ES-AD-3 | ES-AD-30 | ES-AD-31 | ES-AD-32 | ES-AD-33 | ES-AD-34 | ES-AD-35 | ES-AD-36 |
|------------|---------|----------|----------|----------|----------|----------|----------|----------|----------|----------|----------|---------|----------|----------|----------|----------|----------|----------|----------|
| 1.1.1.-    | 38      | 39       | 50       | 71       | 42       | 50       | 71       | 44       | 63       | 60       | 75       | 42      | 52       | 60       | 75       | 42       | 67       | 57       | 59       |
| 1.1.1.1    | 17      | 28       | 39       | 53       | 31       | 27       | 33       | 32       | 38       | 41       | 31       | 12      | 43       | 43       | 57       | 42       | 43       | 46       | 39       |
| 1.1.1.157  | 0       | 3        | 0        | 2        | 1        | 0        | 2        | 0        | 1        | 2        | 1        | 2       | 1        | 2        | 2        | 1        | 1        | 0        | 0        |
| 1.1.1.205  | 5       | 16       | 21       | 32       | 17       | 19       | 21       | 16       | 27       | 24       | 22       | 15      | 17       | 25       | 31       | 20       | 20       | 28       | 16       |
| 1.1.1.35   | 1       | 4        | 2        | 7        | 4        | 2        | 2        | 2        | 6        | 3        | 6        | 3       | 4        | 8        | 6        | 1        | 5        | 4        | 3        |
| 1.12.99.6  | 0       | 1        | 0        | 2        | 2        | 0        | 0        | 2        | 2        | 2        | 1        | 1       | 2        | 1        | 3        | 1        | 3        | 4        | 0        |
| 1.13.11.-  | 0       | 0        | 0        | 0        | 0        | 0        | 0        | 0        | 0        | 0        | 0        | 0       | 0        | 0        | 0        | 0        | 0        | 0        | 0        |
| 1.13.11.1  | 0       | 0        | 0        | 0        | 0        | 0        | 0        | 0        | 0        | 0        | 0        | 0       | 0        | 0        | 0        | 0        | 0        | 0        | 0        |
| 1.13.11.2  | 0       | 0        | 0        | 0        | 0        | 0        | 0        | 0        | 0        | 0        | 0        | 0       | 0        | 0        | 0        | 0        | 0        | 0        | 0        |
| 1.13.11.3  | 0       | 0        | 0        | 0        | 0        | 0        | 0        | 0        | 0        | 0        | 0        | 0       | 0        | 0        | 0        | 0        | 0        | 0        | 0        |
| 1.13.11.39 | 0       | 0        | 0        | 0        | 0        | 0        | 0        | 0        | 0        | 0        | 0        | 0       | 0        | 0        | 0        | 0        | 0        | 0        | 0        |
| 1.13.11.5  | 0       | 0        | 0        | 0        | 0        | 0        | 0        | 0        | 0        | 0        | 0        | 0       | 0        | 0        | 0        | 0        | 0        | 0        | 0        |
| 1.13.11.8  | 0       | 0        | 0        | 0        | 0        | 0        | 0        | 0        | 0        | 0        | 0        | 0       | 0        | 0        | 0        | 0        | 0        | 0        | 0        |
| 1.14.12.10 | 0       | 0        | 0        | 0        | 0        | 0        | 0        | 0        | 0        | 0        | 0        | 0       | 0        | 0        | 0        | 0        | 0        | 0        | 0        |
| 1.14.12.13 | 0       | 0        | 0        | 0        | 0        | 0        | 0        | 0        | 0        | 0        | 0        | 0       | 0        | 0        | 0        | 0        | 0        | 0        | 0        |
| 1.14.12.18 | 0       | 0        | 0        | 0        | 0        | 0        | 0        | 0        | 0        | 0        | 0        | 0       | 0        | 0        | 0        | 0        | 0        | 0        | 0        |
| 1.14.13.-  | 1       | 0        | 1        | 0        | 0        | 0        | 2        | 1        | 0        | 1        | 0        | 0       | 0        | 1        | 0        | 0        | 0        | 0        | 3        |
| 1.14.13.1  | 0       | 0        | 0        | 0        | 0        | 0        | 0        | 0        | 0        | 0        | 0        | 0       | 0        | 0        | 0        | 0        | 0        | 0        | 0        |
| 1.14.13.2  | 0       | 0        | 0        | 0        | 0        | 0        | 0        | 0        | 0        | 0        | 0        | 0       | 0        | 0        | 0        | 0        | 0        | 0        | 0        |
| 1.14.13.50 | 0       | 0        | 0        | 0        | 0        | 0        | 0        | 0        | 0        | 0        | 0        | 0       | 0        | 0        | 0        | 0        | 0        | 0        | 0        |
| 1.14.13.7  | 0       | 0        | 0        | 0        | 0        | 0        | 0        | 0        | 0        | 0        | 0        | 0       | 0        | 0        | 0        | 0        | 0        | 1        | 0        |
| 1.14.13.8  | 0       | 0        | 0        | 0        | 0        | 0        | 0        | 0        | 0        | 0        | 0        | 0       | 0        | 0        | 0        | 0        | 0        | 0        | 0        |
| 1.14.13.82 | 0       | 0        | 0        | 0        | 0        | 0        | 0        | 0        | 0        | 0        | 0        | 0       | 0        | 0        | 0        | 0        | 0        | 0        | 1        |
| 1.14.99.-  | 0       | 0        | 0        | 0        | 0        | 0        | 0        | 0        | 0        | 0        | 0        | 0       | 0        | 0        | 0        | 0        | 0        | 0        | 0        |
| 1.17.99.1  | 0       | 0        | 0        | 0        | 0        | 0        | 0        | 0        | 0        | 0        | 0        | 0       | 0        | 0        | 0        | 0        | 0        | 0        | 0        |
| 1.18.6.1   | 0       | 0        | 0        | 2        | 0        | 0        | 1        | 0        | 0        | 2        | 0        | 0       | 0        | 0        | 0        | 1        | 0        | 0        | 1        |
| 1.2.1.-    | 0       | 0        | 0        | 0        | 0        | 0        | 0        | 0        | 0        | 0        | 0        | 0       | 0        | 0        | 0        | 0        | 0        | 0        | 1        |
| 1.2.1.10   | 3       | 9        | 5        | 7        | 4        | 3        | 4        | 9        | 8        | 11       | 2        | 1       | 7        | 3        | 7        | 3        | 1        | 4        | 3        |
| 1.2.1.3    | 6       | 6        | 8        | 12       | 5        | 3        | 10       | 9        | 11       | 13       | 8        | 1       | 11       | 8        | 14       | 1        | 16       | 11       | 9        |
| 1.2.1.39   | 0       | 0        | 0        | 0        | 0        | 0        | 0        | 0        | 0        | 0        | 0        | 0       | 0        | 0        | 0        | 0        | 0        | 0        | 0        |
| 1.2.7.1    | 7       | 5        | 15       | 28       | 2        | 7        | 14       | 6        | 16       | 16       | 15       | 15      | 9        | 18       | 13       | 9        | 7        | 17       | 8        |
| 1.2.99.2   | 0       | 5        | 4        | 7        | 1        | 1        | 2        | 3        | 8        | 3        | 7        | 0       | 5        | 2        | 4        | 1        | 2        | 4        | 3        |
| 1.3.1.-    | 0       | 0        | 0        | 0        | 1        | 0        | 0        | 0        | 0        | 0        | 0        | 1       | 0        | 0        | 1        | 0        | 0        | 0        | 0        |
| 1.3.1.2    | 0       | 1        | 0        | 1        | 1        | 0        | 0        | 0        | 0        | 1        | 1        | 0       | 0        | 1        | 1        | 2        | 0        | 1        | 0        |
| 1.3.1.25   | 0       | 0        | 0        | 0        | 0        | 0        | 0        | 0        | 0        | 0        | 0        | 0       | 0        | 0        | 0        | 0        | 0        | 0        | 0        |
| 1.3.99.-   | 0       | 0        | 0        | 0        | 0        | 0        | 0        | 0        | 1        | 1        | 0        | 0       | 0        | 0        | 1        | 0        | 0        | 0        | 0        |
| 1.6.5.-    | 29      | 22       | 41       | 56       | 28       | 31       | 45       | 44       | 56       | 47       | 56       | 42      | 44       | 47       | 59       | 42       | 44       | 60       | 53       |
| 1.7.1.-    | 8       | 5        | 9        | 13       | 6        | 8        | 11       | 6        | 11       | 10       | 12       | 8       | 9        | 13       | 10       | 9        | 9        | 9        | 8        |
| 1.8.99.3   | 0       | 1        | 0        | 0        | 0        | 0        | 0        | 0        | 0        | 0        | 0        | 0       | 0        | 0        | 0        | 1        | 0        | 1        | 0        |
| 2.1.1.-    | 160     | 147      | 334      | 388      | 157      | 233      | 303      | 222      | 372      | 303      | 361      | 139     | 266      | 312      | 349      | 255      | 268      | 388      | 261      |
| 2.3.1.-    | 81      | 120      | 177      | 216      | 74       | 136      | 169      | 131      | 212      | 188      | 207      | 87      | 201      | 151      | 180      | 140      | 159      | 193      | 183      |
| 2.3.1.16   | 0       | 1        | 2        | 1        | 1        | 3        | 5        | 0        | 1        | 2        | 0        | 0       | 2        | 2        | 1        | 4        | 1        | 3        | 2        |
| 2.3.1.5    | 0       | 0        | 0        | 0        | 0        | 0        | 0        | 0        | 0        | 0        | 0        | 0       | 0        | 0        | 0        | 0        | 0        | 0        | 1        |
| 2.3.1.9    | 0       | 0        | 0        | 1        | 1        | 0        | 0        | 0        | 1        | 3        | 1        | 0       | 1        | 0        | 0        | 1        | 1        | 1        | 2        |
| 2.4.2.10   | 10      | 9        | 20       | 21       | 6        | 13       | 15       | 13       | 20       | 19       | 22       | 10      | 17       | 17       | 18       | 17       | 15       | 15       | 15       |
| 2.4.2.3    | 6       | 14       | 15       | 17       | 5        | 9        | 9        | 5        | 11       | 6        | 16       | 7       | 9        | 10       | 16       | 12       | 11       | 12       | 12       |
| 2.4.2.4    | 4       | 2        | 5        | 4        | 1        | 2        | 6        | 4        | 11       | 3        | 10       | 0       | 3        | 6        | 3        | 5        | 2        | 5        | 6        |
| 2.4.2.8    | 14      | 10       | 17       | 18       | 11       | 7        | 19       | 6        | 18       | 14       | 15       | 11      | 17       | 15       | 16       | 12       | 14       | 18       | 16       |
| 2.5.1.-    | 17      | 10       | 19       | 38       | 15       | 19       | 16       | 17       | 29       | 21       | 32       | 8       | 24       | 21       | 21       | 13       | 24       | 28       | 19       |



| EC/KO    | ES-AD-2 | ES-AD-20 | ES-AD-21 | ES-AD-22 | ES-AD-23 | ES-AD-24 | ES-AD-25 | ES-AD-26 | ES-AD-27 | ES-AD-28 | ES-AD-29 | ES-AD-3 | ES-AD-30 | ES-AD-31 | ES-AD-32 | ES-AD-33 | ES-AD-34 | ES-AD-35 | ES-AD-36 |
|----------|---------|----------|----------|----------|----------|----------|----------|----------|----------|----------|----------|---------|----------|----------|----------|----------|----------|----------|----------|
| 2.5.1.18 | 0       | 3        | 4        | 1        | 0        | 0        | 1        | 0        | 1        | 2        | 0        | 1       | 0        | 3        | 2        | 2        | 4        | 1        | 10       |
| 2.6.1.-  | 9       | 18       | 33       | 44       | 18       | 21       | 38       | 32       | 48       | 37       | 53       | 15      | 39       | 31       | 37       | 47       | 26       | 44       | 28       |
| 2.7.1.21 | 6       | 5        | 7        | 11       | 1        | 8        | 6        | 6        | 11       | 4        | 10       | 4       | 8        | 11       | 7        | 8        | 4        | 9        | 11       |
| 2.7.1.48 | 23      | 20       | 34       | 40       | 16       | 24       | 41       | 21       | 37       | 28       | 33       | 18      | 29       | 31       | 33       | 23       | 36       | 31       | 32       |
| 2.7.4.-  | 5       | 7        | 18       | 28       | 11       | 14       | 20       | 18       | 27       | 16       | 23       | 8       | 19       | 23       | 18       | 16       | 15       | 23       | 15       |
| 2.8.3.-  | 1       | 0        | 1        | 3        | 2        | 0        | 1        | 1        | 1        | 4        | 0        | 1       | 2        | 1        | 1        | 2        | 2        | 3        | 1        |
| 2.8.3.1  | 0       | 0        | 0        | 1        | 2        | 0        | 0        | 0        | 0        | 0        | 0        | 1       | 1        | 0        | 0        | 0        | 1        | 0        | 0        |
| 2.8.3.12 | 2       | 0        | 1        | 1        | 1        | 0        | 1        | 0        | 1        | 1        | 0        | 1       | 0        | 0        | 1        | 0        | 1        | 0        | 0        |
| 2.8.3.6  | 1       | 1        | 0        | 2        | 1        | 0        | 0        | 2        | 0        | 2        | 0        | 0       | 1        | 1        | 0        | 1        | 0        | 1        | 0        |
| 2.8.3.8  | 1       | 2        | 1        | 3        | 2        | 0        | 2        | 0        | 3        | 8        | 1        | 3       | 3        | 2        | 0        | 3        | 3        | 3        | 0        |
| 3.1.1.-  | 2       | 2        | 5        | 4        | 5        | 3        | 5        | 8        | 6        | 7        | 4        | 5       | 4        | 3        | 6        | 4        | 6        | 5        | 5        |
| 3.1.1.1  | 2       | 7        | 5        | 3        | 7        | 9        | 9        | 5        | 9        | 7        | 11       | 5       | 16       | 7        | 11       | 6        | 14       | 8        | 3        |
| 3.1.1.17 | 0       | 1        | 0        | 4        | 1        | 3        | 2        | 2        | 1        | 4        | 2        | 2       | 1        | 0        | 1        | 1        | 3        | 3        | 4        |
| 3.1.1.2  | 0       | 0        | 0        | 0        | 0        | 0        | 0        | 0        | 0        | 0        | 1        | 0       | 0        | 0        | 0        | 1        | 0        | 0        | 1        |
| 3.1.1.24 | 0       | 1        | 4        | 6        | 1        | 3        | 4        | 4        | 5        | 4        | 3        | 2       | 4        | 3        | 6        | 5        | 2        | 0        | 4        |
| 3.1.1.45 | 0       | 0        | 0        | 0        | 0        | 0        | 0        | 0        | 0        | 0        | 0        | 0       | 0        | 0        | 0        | 0        | 0        | 0        | 1        |
| 3.1.2.-  | 1       | 0        | 0        | 0        | 1        | 1        | 0        | 0        | 0        | 0        | 0        | 0       | 1        | 0        | 2        | 0        | 2        | 0        | 4        |
| 3.1.2.23 | 2       | 5        | 5        | 8        | 2        | 6        | 3        | 6        | 9        | 9        | 5        | 5       | 6        | 4        | 5        | 5        | 5        | 4        | 5        |
| 3.1.3.1  | 8       | 9        | 11       | 14       | 13       | 9        | 12       | 7        | 14       | 17       | 16       | 11      | 23       | 15       | 21       | 13       | 26       | 26       | 10       |
| 3.1.3.2  | 4       | 2        | 4        | 5        | 4        | 4        | 5        | 3        | 4        | 5        | 5        | 4       | 9        | 6        | 1        | 4        | 3        | 6        | 6        |
| 3.1.3.41 | 0       | 0        | 0        | 0        | 1        | 1        | 0        | 0        | 0        | 0        | 0        | 0       | 2        | 1        | 2        | 0        | 2        | 0        | 0        |
| 3.2.1.31 | 5       | 0        | 8        | 5        | 3        | 2        | 1        | 1        | 5        | 2        | 5        | 7       | 4        | 8        | 4        | 3        | 3        | 3        | 4        |
| 3.3.2.9  | 0       | 0        | 0        | 0        | 0        | 0        | 0        | 0        | 0        | 0        | 0        | 0       | 0        | 0        | 0        | 0        | 0        | 0        | 1        |
| 3.5.1.-  | 11      | 21       | 36       | 34       | 16       | 18       | 34       | 17       | 33       | 18       | 43       | 9       | 22       | 37       | 32       | 22       | 22       | 27       | 25       |
| 3.5.1.4  | 2       | 2        | 2        | 4        | 1        | 3        | 4        | 1        | 5        | 3        | 1        | 2       | 3        | 1        | 1        | 5        | 4        | 4        | 0        |
| 3.5.1.5  | 0       | 2        | 0        | 2        | 0        | 1        | 3        | 1        | 1        | 5        | 4        | 2       | 0        | 1        | 2        | 1        | 3        | 2        | 3        |
| 3.5.1.54 | 3       | 1        | 6        | 6        | 4        | 2        | 7        | 2        | 6        | 3        | 4        | 3       | 3        | 5        | 8        | 4        | 1        | 8        | 4        |
| 3.5.1.6  | 1       | 1        | 3        | 4        | 0        | 0        | 0        | 0        | 0        | 2        | 0        | 2       | 1        | 2        | 1        | 1        | 0        | 0        | 1        |
| 3.5.2.-  | 0       | 0        | 0        | 0        | 0        | 0        | 0        | 0        | 0        | 0        | 0        | 0       | 0        | 0        | 1        | 0        | 1        | 0        | 0        |
| 3.5.2.2  | 0       | 2        | 0        | 2        | 2        | 1        | 4        | 1        | 3        | 1        | 2        | 1       | 1        | 1        | 1        | 2        | 1        | 1        | 1        |
| 3.5.4.-  | 10      | 13       | 27       | 39       | 12       | 21       | 29       | 20       | 37       | 28       | 33       | 17      | 27       | 30       | 28       | 25       | 30       | 33       | 30       |
| 3.5.4.5  | 8       | 8        | 14       | 19       | 7        | 11       | 23       | 8        | 22       | 14       | 18       | 11      | 10       | 12       | 15       | 10       | 10       | 16       | 13       |
| 3.5.5.1  | 0       | 0        | 1        | 4        | 0        | 1        | 2        | 1        | 3        | 3        | 1        | 0       | 1        | 1        | 0        | 2        | 2        | 1        | 1        |
| 3.5.5.7  | 0       | 0        | 0        | 0        | 0        | 0        | 0        | 0        | 0        | 0        | 0        | 0       | 0        | 0        | 0        | 0        | 0        | 0        | 0        |
| 3.5.99.3 | 0       | 1        | 1        | 0        | 0        | 0        | 1        | 0        | 0        | 0        | 0        | 0       | 0        | 0        | 0        | 0        | 0        | 0        | 0        |
| 3.6.1.7  | 2       | 3        | 3        | 7        | 6        | 1        | 4        | 6        | 4        | 4        | 7        | 5       | 1        | 7        | 9        | 4        | 5        | 9        | 5        |
| 3.7.1.-  | 2       | 0        | 3        | 2        | 1        | 1        | 3        | 0        | 2        | 5        | 2        | 1       | 2        | 2        | 2        | 1        | 4        | 2        | 0        |
| 3.7.1.2  | 1       | 5        | 5        | 2        | 4        | 6        | 4        | 5        | 2        | 6        | 5        | 2       | 3        | 2        | 3        | 0        | 5        | 7        | 3        |
| 3.8.1.2  | 1       | 4        | 5        | 7        | 4        | 5        | 9        | 6        | 8        | 9        | 10       | 4       | 11       | 5        | 5        | 6        | 5        | 8        | 6        |
| 3.8.1.3  | 0       | 0        | 0        | 0        | 0        | 0        | 0        | 0        | 0        | 0        | 0        | 0       | 0        | 1        | 0        | 0        | 0        | 0        | 0        |
| 3.8.1.5  | 0       | 0        | 0        | 0        | 2        | 0        | 2        | 0        | 2        | 2        | 3        | 0       | 2        | 1        | 4        | 0        | 1        | 0        | 1        |
| 4.1.1.-  | 4       | 8        | 12       | 19       | 8        | 5        | 14       | 9        | 13       | 16       | 6        | 6       | 12       | 12       | 12       | 10       | 12       | 12       | 8        |
| 4.1.1.44 | 35      | 11       | 22       | 29       | 14       | 23       | 28       | 30       | 34       | 35       | 25       | 48      | 30       | 27       | 33       | 18       | 18       | 35       | 19       |
| 4.1.1.55 | 0       | 0        | 0        | 0        | 0        | 0        | 0        | 0        | 0        | 1        | 0        | 0       | 0        | 0        | 0        | 0        | 0        | 0        | 0        |
| 4.1.1.7  | 0       | 0        | 0        | 0        | 0        | 0        | 0        | 0        | 0        | 0        | 0        | 0       | 0        | 0        | 0        | 0        | 0        | 0        | 0        |
| 4.1.1.70 | 0       | 0        | 1        | 0        | 0        | 0        | 0        | 0        | 0        | 0        | 0        | 1       | 1        | 0        | 0        | 1        | 0        | 1        | 1        |
| 4.1.1.77 | 0       | 0        | 0        | 0        | 0        | 0        | 0        | 0        | 0        | 0        | 0        | 0       | 0        | 0        | 0        | 0        | 0        | 0        | 0        |
| 4.1.2.-  | 2       | 2        | 7        | 9        | 4        | 1        | 7        | 3        | 8        | 6        | 6        | 3       | 10       | 4        | 9        | 1        | 4        | 3        | 5        |
| 4.1.3.-  | 9       | 7        | 29       | 28       | 11       | 15       | 23       | 19       | 26       | 18       | 26       | 16      | 20       | 20       | 21       | 17       | 20       | 23       | 20       |

| EC/KO    | ES-AD-2 | ES-AD-20 | ES-AD-21 | ES-AD-22 | ES-AD-23 | ES-AD-24 | ES-AD-25 | ES-AD-26 | ES-AD-27 | ES-AD-28 | ES-AD-29 | ES-AD-3 | ES-AD-30 | ES-AD-31 | ES-AD-32 | ES-AD-33 | ES-AD-34 | ES-AD-35 | ES-AD-36 |
|----------|---------|----------|----------|----------|----------|----------|----------|----------|----------|----------|----------|---------|----------|----------|----------|----------|----------|----------|----------|
| 4.1.3.39 | 0       | 0        | 0        | 1        | 1        | 0        | 1        | 0        | 1        | 0        | 0        | 0       | 0        | 0        | 0        | 0        | 0        | 0        | 0        |
| 4.1.99.- | 0       | 3        | 3        | 2        | 2        | 2        | 2        | 0        | 3        | 2        | 5        | 0       | 0        | 3        | 2        | 3        | 1        | 0        | 1        |
| 4.2.1.-  | 19      | 39       | 60       | 65       | 32       | 36       | 48       | 43       | 58       | 59       | 70       | 31      | 55       | 40       | 70       | 40       | 59       | 55       | 44       |
| 4.2.1.17 | 4       | 3        | 5        | 5        | 6        | 8        | 7        | 2        | 3        | 9        | 7        | 4       | 3        | 4        | 13       | 6        | 4        | 7        | 7        |
| 4.2.1.80 | 0       | 0        | 0        | 0        | 0        | 0        | 0        | 0        | 0        | 0        | 0        | 0       | 0        | 0        | 0        | 0        | 0        | 0        | 0        |
| 4.2.1.83 | 0       | 0        | 2        | 0        | 0        | 0        | 2        | 1        | 1        | 0        | 1        | 0       | 0        | 0        | 0        | 1        | 1        | 1        | 1        |
| 4.2.1.84 | 0       | 0        | 0        | 1        | 0        | 0        | 0        | 0        | 0        | 0        | 0        | 0       | 0        | 0        | 0        | 0        | 1        | 0        | 1        |
| 5.1.2.2  | 0       | 1        | 0        | 0        | 0        | 0        | 0        | 0        | 0        | 0        | 0        | 0       | 0        | 0        | 0        | 0        | 0        | 0        | 0        |
| 5.2.1.2  | 0       | 0        | 0        | 0        | 0        | 0        | 0        | 0        | 0        | 0        | 0        | 0       | 0        | 0        | 0        | 0        | 0        | 0        | 0        |
| 5.3.3.4  | 0       | 0        | 0        | 0        | 0        | 0        | 0        | 0        | 0        | 0        | 0        | 0       | 0        | 0        | 0        | 0        | 0        | 0        | 0        |
| 5.3.99.- | 1       | 3        | 2        | 5        | 2        | 5        | 1        | 3        | 2        | 2        | 5        | 1       | 6        | 2        | 2        | 2        | 2        | 3        | 2        |
| 5.4.99.- | 1       | 1        | 0        | 1        | 0        | 1        | 1        | 0        | 0        | 1        | 1        | 0       | 1        | 1        | 0        | 0        | 0        | 0        | 1        |
| 5.5.1.1  | 2       | 2        | 3        | 1        | 2        | 1        | 5        | 5        | 4        | 4        | 5        | 2       | 4        | 2        | 2        | 4        | 3        | 2        | 1        |
| 5.5.1.2  | 0       | 0        | 0        | 0        | 0        | 0        | 0        | 0        | 0        | 0        | 0        | 0       | 0        | 0        | 0        | 0        | 0        | 0        | 0        |
| 6.2.1.-  | 0       | 0        | 0        | 0        | 0        | 0        | 0        | 0        | 0        | 0        | 0        | 0       | 0        | 0        | 0        | 0        | 0        | 0        | 0        |
| 6.3.5.2  | 6       | 13       | 15       | 20       | 18       | 15       | 25       | 17       | 21       | 36       | 21       | 12      | 26       | 16       | 21       | 18       | 19       | 26       | 18       |
| K00002   | 1       | 1        | 1        | 3        | 1        | 2        | 3        | 1        | 3        | 5        | 1        | 0       | 1        | 1        | 5        | 1        | 3        | 5        | 1        |
| K00055   | 0       | 1        | 0        | 0        | 0        | 0        | 0        | 0        | 0        | 0        | 0        | 0       | 0        | 0        | 0        | 0        | 0        | 0        | 0        |
| K00074   | 6       | 7        | 2        | 10       | 6        | 3        | 5        | 3        | 8        | 8        | 9        | 11      | 6        | 12       | 8        | 3        | 7        | 5        | 3        |
| K00088   | 6       | 15       | 15       | 27       | 9        | 18       | 13       | 12       | 24       | 22       | 17       | 8       | 16       | 19       | 25       | 19       | 18       | 21       | 14       |
| K00100   | 23      | 37       | 45       | 72       | 44       | 35       | 56       | 31       | 61       | 57       | 68       | 37      | 62       | 55       | 73       | 45       | 64       | 79       | 60       |
| K00128   | 0       | 2        | 2        | 2        | 0        | 0        | 1        | 2        | 5        | 4        | 3        | 0       | 3        | 3        | 2        | 1        | 2        | 4        | 2        |
| K00129   | 0       | 0        | 0        | 0        | 0        | 0        | 0        | 0        | 0        | 0        | 0        | 0       | 0        | 0        | 0        | 0        | 0        | 0        | 0        |
| K00132   | 0       | 0        | 0        | 1        | 0        | 0        | 1        | 0        | 0        | 0        | 2        | 0       | 0        | 0        | 0        | 0        | 0        | 0        | 0        |
| K00141   | 0       | 0        | 0        | 0        | 0        | 0        | 0        | 0        | 0        | 0        | 0        | 0       | 0        | 0        | 0        | 0        | 0        | 0        | 0        |
| K00146   | 0       | 0        | 0        | 0        | 0        | 0        | 0        | 0        | 0        | 0        | 0        | 0       | 0        | 0        | 0        | 0        | 0        | 0        | 0        |
| K00148   | 0       | 0        | 0        | 0        | 0        | 0        | 0        | 0        | 0        | 0        | 0        | 0       | 0        | 0        | 0        | 0        | 0        | 0        | 1        |
| K00155   | 1       | 0        | 0        | 0        | 1        | 0        | 0        | 0        | 0        | 0        | 0        | 0       | 0        | 0        | 0        | 0        | 1        | 1        | 1        |
| K00169   | 0       | 0        | 4        | 4        | 1        | 2        | 3        | 1        | 3        | 2        | 2        | 0       | 0        | 5        | 2        | 1        | 1        | 4        | 2        |
| K00224   | 0       | 0        | 1        | 1        | 1        | 1        | 0        | 0        | 1        | 1        | 0        | 0       | 0        | 1        | 1        | 0        | 1        | 1        | 0        |
| K00274   | 0       | 0        | 0        | 0        | 0        | 0        | 0        | 0        | 0        | 0        | 0        | 0       | 0        | 0        | 0        | 0        | 0        | 0        | 0        |
| K00446   | 0       | 0        | 0        | 0        | 0        | 0        | 0        | 0        | 0        | 0        | 0        | 0       | 0        | 0        | 0        | 0        | 0        | 0        | 1        |
| K00448   | 0       | 0        | 0        | 0        | 0        | 0        | 0        | 0        | 0        | 0        | 0        | 0       | 0        | 0        | 0        | 0        | 0        | 0        | 0        |
| K00462   | 0       | 1        | 1        | 1        | 0        | 1        | 1        | 1        | 1        | 0        | 1        | 1       | 0        | 0        | 1        | 0        | 1        | 2        | 1        |
| K00480   | 0       | 0        | 0        | 0        | 0        | 0        | 0        | 0        | 0        | 0        | 0        | 0       | 0        | 0        | 0        | 0        | 0        | 0        | 0        |
| K00481   | 0       | 0        | 0        | 0        | 0        | 0        | 0        | 0        | 0        | 0        | 0        | 0       | 0        | 0        | 0        | 0        | 0        | 0        | 0        |
| K00539   | 0       | 0        | 1        | 1        | 0        | 0        | 0        | 2        | 1        | 2        | 2        | 1       | 0        | 0        | 1        | 0        | 3        | 4        | 0        |
| K00599   | 20      | 41       | 59       | 64       | 25       | 43       | 48       | 31       | 47       | 38       | 69       | 14      | 47       | 57       | 60       | 46       | 53       | 54       | 44       |
| K00626   | 0       | 3        | 3        | 5        | 1        | 3        | 5        | 0        | 3        | 9        | 0        | 1       | 3        | 4        | 3        | 8        | 4        | 4        | 4        |
| K00632   | 0       | 0        | 0        | 0        | 0        | 0        | 0        | 0        | 0        | 0        | 0        | 0       | 0        | 0        | 0        | 0        | 0        | 0        | 0        |
| K00680   | 24      | 33       | 47       | 66       | 28       | 32       | 36       | 36       | 56       | 61       | 55       | 30      | 51       | 35       | 54       | 33       | 47       | 51       | 28       |
| K00757   | 9       | 10       | 13       | 15       | 7        | 9        | 9        | 11       | 14       | 10       | 13       | 8       | 10       | 12       | 13       | 10       | 14       | 12       | 12       |
| K00758   | 2       | 0        | 6        | 5        | 0        | 3        | 8        | 4        | 7        | 7        | 4        | 2       | 6        | 5        | 4        | 3        | 2        | 7        | 5        |
| K00760   | 16      | 13       | 27       | 34       | 15       | 17       | 29       | 14       | 34       | 22       | 30       | 16      | 22       | 26       | 28       | 20       | 24       | 29       | 29       |
| K00799   | 0       | 2        | 0        | 2        | 0        | 0        | 1        | 1        | 1        | 1        | 0        | 0       | 0        | 0        | 0        | 0        | 1        | 1        | 3        |
| K00857   | 8       | 8        | 14       | 19       | 3        | 10       | 13       | 15       | 18       | 6        | 13       | 5       | 12       | 18       | 11       | 11       | 6        | 16       | 15       |
| K00876   | 17      | 16       | 32       | 33       | 15       | 24       | 30       | 23       | 34       | 28       | 32       | 12      | 27       | 32       | 29       | 25       | 24       | 42       | 31       |
| K01026   | 2       | 1        | 1        | 2        | 0        | 0        | 2        | 0        | 1        | 0        | 0        | 1       | 1        | 2        | 0        | 2        | 1        | 0        | 0        |
| K01031   | 0       | 0        | 0        | 0        | 0        | 0        | 0        | 0        | 0        | 0        | 0        | 0       | 0        | 0        | 0        | 0        | 0        | 0        | 0        |

| EC/KO  | ES-AD-2 | ES-AD-20 | ES-AD-21 | ES-AD-22 | ES-AD-23 | ES-AD-24 | ES-AD-25 | ES-AD-26 | ES-AD-27 | ES-AD-28 | ES-AD-29 | ES-AD-3 | ES-AD-30 | ES-AD-31 | ES-AD-32 | ES-AD-33 | ES-AD-34 | ES-AD-35 | ES-AD-36 |
|--------|---------|----------|----------|----------|----------|----------|----------|----------|----------|----------|----------|---------|----------|----------|----------|----------|----------|----------|----------|
| K01034 | 2       | 3        | 3        | 2        | 1        | 1        | 3        | 2        | 2        | 5        | 2        | 0       | 2        | 1        | 1        | 3        | 2        | 2        | 1        |
| K01039 | 0       | 1        | 0        | 0        | 1        | 0        | 0        | 0        | 0        | 1        | 1        | 1       | 0        | 0        | 0        | 1        | 0        | 0        | 0        |
| K01041 | 3       | 1        | 6        | 9        | 1        | 5        | 1        | 5        | 7        | 5        | 1        | 3       | 5        | 8        | 5        | 8        | 9        | 11       | 3        |
| K01053 | 0       | 0        | 0        | 0        | 0        | 0        | 0        | 0        | 1        | 0        | 0        | 0       | 0        | 0        | 0        | 0        | 0        | 0        | 0        |
| K01055 | 0       | 0        | 0        | 0        | 0        | 0        | 0        | 0        | 0        | 0        | 0        | 0       | 0        | 0        | 0        | 0        | 0        | 0        | 0        |
| K01061 | 0       | 0        | 0        | 0        | 0        | 0        | 0        | 0        | 0        | 0        | 0        | 0       | 1        | 0        | 0        | 1        | 0        | 0        | 1        |
| K01066 | 1       | 4        | 8        | 8        | 3        | 7        | 7        | 7        | 15       | 5        | 5        | 7       | 14       | 10       | 12       | 5        | 12       | 10       | 4        |
| K01075 | 0       | 0        | 1        | 2        | 1        | 0        | 1        | 2        | 2        | 2        | 0        | 0       | 0        | 0        | 1        | 1        | 2        | 2        | 2        |
| K01077 | 1       | 4        | 8        | 8        | 9        | 6        | 4        | 5        | 7        | 11       | 8        | 2       | 13       | 3        | 16       | 6        | 13       | 9        | 6        |
| K01101 | 0       | 1        | 2        | 7        | 3        | 6        | 4        | 3        | 9        | 5        | 1        | 2       | 9        | 3        | 4        | 6        | 4        | 2        | 3        |
| K01195 | 2       | 4        | 10       | 13       | 4        | 5        | 9        | 4        | 12       | 5        | 6        | 3       | 5        | 10       | 10       | 7        | 10       | 8        | 4        |
| K01426 | 0       | 1        | 0        | 1        | 0        | 0        | 2        | 2        | 1        | 0        | 1        | 0       | 0        | 1        | 0        | 1        | 0        | 2        | 0        |
| K01428 | 0       | 0        | 0        | 2        | 0        | 1        | 1        | 1        | 0        | 1        | 0        | 0       | 0        | 0        | 2        | 0        | 0        | 0        | 2        |
| K01457 | 0       | 0        | 0        | 1        | 0        | 0        | 0        | 0        | 1        | 0        | 0        | 0       | 0        | 0        | 0        | 0        | 0        | 0        | 0        |
| K01464 | 1       | 3        | 0        | 5        | 3        | 1        | 5        | 1        | 3        | 5        | 3        | 2       | 2        | 2        | 1        | 2        | 1        | 2        | 2        |
| K01489 | 14      | 13       | 21       | 33       | 10       | 16       | 27       | 11       | 31       | 20       | 22       | 14      | 15       | 20       | 20       | 17       | 17       | 26       | 21       |
| K01500 | 0       | 0        | 0        | 0        | 0        | 0        | 0        | 0        | 0        | 0        | 0        | 0       | 0        | 0        | 0        | 0        | 0        | 0        | 0        |
| K01501 | 0       | 2        | 3        | 3        | 0        | 2        | 3        | 2        | 5        | 5        | 3        | 1       | 2        | 3        | 4        | 2        | 3        | 3        | 1        |
| K01502 | 0       | 0        | 0        | 0        | 0        | 0        | 0        | 0        | 0        | 0        | 0        | 0       | 0        | 0        | 0        | 0        | 0        | 0        | 0        |
| K01512 | 4       | 6        | 10       | 12       | 8        | 3        | 8        | 9        | 11       | 8        | 9        | 5       | 3        | 10       | 14       | 8        | 10       | 13       | 5        |
| K01560 | 6       | 2        | 5        | 6        | 5        | 1        | 6        | 5        | 13       | 4        | 6        | 2       | 10       | 13       | 12       | 4        | 9        | 7        | 8        |
| K01561 | 0       | 0        | 0        | 0        | 0        | 0        | 0        | 0        | 1        | 0        | 0        | 0       | 1        | 0        | 0        | 0        | 0        | 0        | 0        |
| K01563 | 0       | 0        | 0        | 0        | 0        | 0        | 0        | 0        | 0        | 0        | 0        | 0       | 0        | 0        | 0        | 0        | 0        | 0        | 0        |
| K01564 | 0       | 1        | 1        | 2        | 0        | 1        | 0        | 0        | 1        | 2        | 1        | 0       | 2        | 0        | 1        | 1        | 1        | 4        | 1        |
| K01607 | 16      | 5        | 11       | 7        | 5        | 9        | 15       | 13       | 17       | 20       | 11       | 26      | 10       | 8        | 18       | 7        | 6        | 14       | 8        |
| K01612 | 0       | 0        | 0        | 1        | 0        | 0        | 0        | 0        | 1        | 1        | 0        | 0       | 0        | 0        | 0        | 0        | 0        | 0        | 0        |
| K01615 | 7       | 6        | 14       | 20       | 6        | 7        | 14       | 9        | 19       | 20       | 20       | 3       | 14       | 12       | 18       | 14       | 12       | 19       | 16       |
| K01617 | 0       | 0        | 0        | 0        | 0        | 0        | 0        | 0        | 0        | 0        | 0        | 0       | 0        | 0        | 0        | 0        | 0        | 0        | 0        |
| K01666 | 1       | 3        | 12       | 12       | 5        | 7        | 7        | 6        | 8        | 6        | 8        | 1       | 2        | 4        | 8        | 5        | 1        | 7        | 7        |
| K01692 | 0       | 0        | 0        | 0        | 0        | 0        | 0        | 0        | 1        | 1        | 1        | 0       | 1        | 0        | 0        | 0        | 1        | 2        | 0        |
| K01721 | 0       | 0        | 0        | 0        | 0        | 0        | 0        | 0        | 0        | 0        | 0        | 0       | 0        | 0        | 0        | 0        | 0        | 0        | 0        |
| K01726 | 1       | 12       | 7        | 6        | 4        | 7        | 7        | 7        | 9        | 7        | 11       | 4       | 9        | 9        | 9        | 7        | 9        | 10       | 7        |
| K01781 | 0       | 1        | 0        | 0        | 0        | 0        | 2        | 0        | 0        | 0        | 0        | 0       | 2        | 0        | 0        | 0        | 0        | 0        | 1        |
| K01821 | 1       | 4        | 0        | 3        | 1        | 1        | 2        | 2        | 2        | 3        | 1        | 2       | 0        | 0        | 3        | 1        | 1        | 3        | 2        |
| K01856 | 0       | 0        | 0        | 0        | 0        | 0        | 0        | 0        | 0        | 0        | 0        | 0       | 0        | 0        | 0        | 0        | 0        | 0        | 0        |
| K01857 | 0       | 0        | 0        | 0        | 0        | 0        | 0        | 0        | 0        | 0        | 0        | 0       | 0        | 0        | 1        | 0        | 1        | 0        | 0        |
| K01913 | 0       | 0        | 1        | 0        | 0        | 0        | 0        | 0        | 1        | 0        | 1        | 0       | 1        | 1        | 0        | 0        | 0        | 1        | 0        |
| K01951 | 6       | 8        | 9        | 16       | 10       | 13       | 15       | 10       | 17       | 22       | 13       | 7       | 14       | 15       | 13       | 17       | 15       | 19       | 13       |
| K02554 | 0       | 0        | 0        | 0        | 0        | 0        | 0        | 0        | 0        | 0        | 0        | 0       | 0        | 0        | 0        | 0        | 0        | 0        | 0        |
| K03381 | 0       | 0        | 0        | 0        | 0        | 0        | 0        | 0        | 0        | 0        | 0        | 0       | 0        | 0        | 0        | 0        | 0        | 0        | 0        |
| K03382 | 0       | 1        | 1        | 1        | 0        | 0        | 1        | 2        | 2        | 0        | 0        | 0       | 1        | 0        | 1        | 0        | 1        | 1        | 1        |
| K03464 | 0       | 0        | 0        | 0        | 0        | 0        | 0        | 0        | 0        | 0        | 0        | 0       | 0        | 0        | 0        | 0        | 0        | 0        | 0        |
| K03518 | 13      | 10       | 12       | 15       | 11       | 2        | 15       | 8        | 18       | 24       | 12       | 9       | 8        | 11       | 14       | 11       | 6        | 15       | 11       |
| K03862 | 0       | 0        | 0        | 0        | 0        | 0        | 0        | 0        | 0        | 0        | 0        | 0       | 0        | 0        | 0        | 0        | 0        | 0        | 0        |
| K04099 | 0       | 0        | 0        | 0        | 0        | 0        | 0        | 0        | 0        | 0        | 0        | 0       | 0        | 0        | 0        | 0        | 0        | 0        | 0        |
| K04100 | 0       | 0        | 0        | 0        | 0        | 0        | 0        | 0        | 0        | 0        | 0        | 0       | 0        | 0        | 0        | 0        | 0        | 0        | 0        |
| K04102 | 0       | 0        | 0        | 0        | 0        | 0        | 0        | 0        | 0        | 1        | 0        | 0       | 0        | 0        | 0        | 0        | 0        | 0        | 0        |
| K04116 | 0       | 0        | 0        | 0        | 0        | 0        | 0        | 0        | 0        | 0        | 0        | 0       | 0        | 0        | 0        | 0        | 0        | 0        | 0        |
| K05394 | 1       | 0        | 0        | 2        | 2        | 1        | 0        | 2        | 0        | 1        | 1        | 0       | 2        | 0        | 1        | 1        | 2        | 1        | 1        |

| EC/KO  | ES-AD-2 | ES-AD-20 | ES-AD-21 | ES-AD-22 | ES-AD-23 | ES-AD-24 | ES-AD-25 | ES-AD-26 | ES-AD-27 | ES-AD-28 | ES-AD-29 | ES-AD-3 | ES-AD-30 | ES-AD-31 | ES-AD-32 | ES-AD-33 | ES-AD-34 | ES-AD-35 | ES-AD-36 |
|--------|---------|----------|----------|----------|----------|----------|----------|----------|----------|----------|----------|---------|----------|----------|----------|----------|----------|----------|----------|
| K05549 | 0       | 0        | 0        | 0        | 0        | 0        | 0        | 0        | 0        | 0        | 0        | 0       | 0        | 0        | 0        | 0        | 0        | 0        | 0        |
| K05783 | 0       | 0        | 0        | 0        | 0        | 0        | 0        | 0        | 0        | 0        | 0        | 0       | 0        | 0        | 0        | 0        | 0        | 0        | 0        |
| K05797 | 0       | 0        | 0        | 0        | 0        | 0        | 0        | 0        | 0        | 0        | 0        | 0       | 0        | 0        | 0        | 0        | 0        | 0        | 0        |
| K06281 | 1       | 1        | 0        | 2        | 2        | 0        | 0        | 2        | 2        | 2        | 1        | 0       | 1        | 0        | 3        | 1        | 1        | 3        | 0        |
| K06446 | 8       | 5        | 3        | 6        | 6        | 4        | 4        | 5        | 4        | 8        | 1        | 9       | 6        | 5        | 6        | 7        | 3        | 6        | 4        |
| K06912 | 0       | 0        | 0        | 0        | 0        | 0        | 0        | 0        | 0        | 0        | 0        | 0       | 0        | 0        | 0        | 0        | 0        | 0        | 0        |
| K07535 | 0       | 0        | 0        | 0        | 0        | 0        | 0        | 0        | 1        | 0        | 0        | 0       | 0        | 1        | 0        | 0        | 1        | 0        | 0        |
| K07536 | 5       | 0        | 2        | 4        | 1        | 2        | 1        | 1        | 3        | 3        | 3        | 3       | 3        | 3        | 2        | 3        | 2        | 4        | 1        |
| K08689 | 0       | 0        | 0        | 0        | 0        | 0        | 0        | 0        | 0        | 0        | 0        | 0       | 0        | 0        | 0        | 0        | 0        | 0        | 0        |
| K08710 | 0       | 0        | 0        | 0        | 0        | 0        | 0        | 0        | 0        | 0        | 0        | 0       | 0        | 0        | 0        | 0        | 0        | 0        | 0        |
| K09461 | 0       | 0        | 0        | 0        | 1        | 0        | 0        | 0        | 0        | 0        | 0        | 0       | 2        | 0        | 1        | 0        | 3        | 0        | 0        |
| K10217 | 0       | 0        | 0        | 0        | 0        | 0        | 0        | 0        | 0        | 0        | 0        | 0       | 0        | 0        | 0        | 0        | 0        | 0        | 0        |
| K10218 | 0       | 1        | 1        | 0        | 0        | 0        | 0        | 0        | 0        | 0        | 1        | 1       | 0        | 0        | 1        | 0        | 0        | 1        | 0        |
| K10220 | 0       | 0        | 0        | 0        | 0        | 0        | 0        | 0        | 0        | 0        | 0        | 0       | 0        | 0        | 0        | 0        | 0        | 0        | 0        |
| K11180 | 0       | 0        | 0        | 0        | 0        | 0        | 0        | 1        | 0        | 1        | 0        | 0       | 0        | 0        | 0        | 0        | 0        | 0        | 0        |
| K13953 | 0       | 0        | 0        | 0        | 0        | 0        | 0        | 0        | 0        | 0        | 0        | 0       | 1        | 0        | 0        | 1        | 1        | 0        | 2        |
| K14333 | 0       | 0        | 0        | 0        | 0        | 0        | 0        | 0        | 0        | 0        | 0        | 0       | 0        | 0        | 0        | 0        | 0        | 0        | 0        |
| K14519 | 0       | 0        | 0        | 0        | 0        | 0        | 0        | 0        | 0        | 0        | 0        | 0       | 0        | 0        | 0        | 0        | 0        | 0        | 0        |
| K15054 | 0       | 0        | 0        | 0        | 0        | 0        | 0        | 0        | 0        | 0        | 0        | 0       | 0        | 0        | 0        | 0        | 0        | 0        | 0        |
| K16173 | 0       | 0        | 0        | 1        | 2        | 0        | 2        | 0        | 0        | 2        | 0        | 0       | 0        | 0        | 0        | 0        | 3        | 1        | 0        |
| K16514 | 0       | 2        | 0        | 0        | 0        | 0        | 0        | 0        | 0        | 1        | 0        | 0       | 0        | 1        | 0        | 0        | 0        | 0        | 0        |
| K16874 | 0       | 1        | 0        | 0        | 1        | 0        | 0        | 0        | 0        | 0        | 0        | 0       | 0        | 0        | 0        | 0        | 0        | 0        | 0        |

| EC/KO       | ES-AD-37 | ES-AD-38 | ES-AD-39 | ES-AD-4 | ES-AD-5 | ES-AD-6 | ES-AD-7 | ES-AD-8 | ES-AD-9 | FR-AD-1 | FR-AD-2 | FR-AD-3 | FR-AD-4 | FR-AD-5 | FR-AD-6 | FR-AD-7 | FR-AD-8 | IN-1660SH | IN-1660SK | IN-199SD |
|-------------|----------|----------|----------|---------|---------|---------|---------|---------|---------|---------|---------|---------|---------|---------|---------|---------|---------|-----------|-----------|----------|
| 1.1.1.-     | 49       | 81       | 61       | 43      | 37      | 37      | 45      | 13      | 13      | 41      | 25      | 37      | 40      | 32      | 41      | 31      | 32      | 16        | 17        | 24       |
| 1.1.1.1     | 29       | 51       | 48       | 22      | 31      | 14      | 34      | 14      | 12      | 27      | 12      | 9       | 14      | 25      | 17      | 20      | 11      | 10        | 11        | 10       |
| 1.1.1.157   | 0        | 1        | 0        | 0       | 0       | 0       | 0       | 0       | 0       | 1       | 0       | 0       | 3       | 1       | 1       | 0       | 0       | 0         | 3         | 0        |
| 1.1.1.205   | 17       | 24       | 26       | 21      | 12      | 13      | 25      | 8       | 7       | 11      | 9       | 7       | 7       | 8       | 7       | 11      | 7       | 14        | 9         | 19       |
| 1.1.1.35    | 0        | 4        | 5        | 4       | 2       | 2       | 4       | 1       | 1       | 4       | 0       | 0       | 2       | 1       | 5       | 0       | 2       | 0         | 1         | 0        |
| 1.1.2.99.6  | 2        | 3        | 1        | 2       | 0       | 0       | 1       | 1       | 0       | 0       | 1       | 1       | 0       | 0       | 0       | 1       | 1       | 0         | 0         | 0        |
| 1.1.3.11.-  | 0        | 0        | 0        | 0       | 0       | 0       | 0       | 0       | 0       | 0       | 0       | 0       | 0       | 0       | 0       | 0       | 0       | 0         | 0         | 0        |
| 1.1.3.11.1  | 0        | 0        | 0        | 0       | 0       | 0       | 0       | 0       | 0       | 0       | 0       | 0       | 0       | 0       | 0       | 0       | 0       | 0         | 0         | 0        |
| 1.1.3.11.2  | 0        | 0        | 0        | 0       | 0       | 0       | 0       | 0       | 0       | 0       | 0       | 0       | 0       | 0       | 0       | 0       | 0       | 0         | 0         | 0        |
| 1.1.3.11.3  | 0        | 0        | 0        | 0       | 0       | 0       | 0       | 0       | 0       | 0       | 0       | 0       | 0       | 0       | 0       | 0       | 0       | 0         | 0         | 0        |
| 1.1.3.11.39 | 0        | 0        | 0        | 0       | 0       | 0       | 0       | 0       | 0       | 0       | 0       | 0       | 0       | 0       | 0       | 0       | 0       | 0         | 0         | 0        |
| 1.1.3.11.5  | 0        | 0        | 0        | 0       | 0       | 0       | 0       | 0       | 0       | 0       | 0       | 0       | 0       | 0       | 0       | 0       | 0       | 0         | 0         | 0        |
| 1.1.3.11.8  | 0        | 0        | 0        | 0       | 0       | 0       | 0       | 0       | 0       | 0       | 0       | 0       | 0       | 0       | 0       | 0       | 0       | 0         | 0         | 0        |
| 1.1.4.12.10 | 0        | 0        | 0        | 0       | 0       | 1       | 0       | 0       | 0       | 0       | 0       | 0       | 0       | 0       | 0       | 0       | 0       | 0         | 0         | 0        |
| 1.1.4.12.13 | 0        | 0        | 0        | 0       | 0       | 0       | 0       | 0       | 0       | 0       | 0       | 0       | 0       | 0       | 0       | 0       | 0       | 0         | 0         | 0        |
| 1.1.4.12.18 | 0        | 0        | 0        | 0       | 0       | 0       | 0       | 0       | 0       | 0       | 0       | 0       | 0       | 0       | 0       | 0       | 0       | 0         | 0         | 0        |
| 1.1.4.13.-  | 1        | 1        | 1        | 0       | 0       | 0       | 0       | 0       | 0       | 0       | 0       | 0       | 0       | 0       | 0       | 0       | 0       | 0         | 0         | 0        |
| 1.1.4.13.1  | 0        | 0        | 0        | 0       | 0       | 0       | 0       | 0       | 0       | 0       | 0       | 0       | 0       | 0       | 0       | 0       | 0       | 0         | 0         | 0        |
| 1.1.4.13.2  | 0        | 0        | 0        | 0       | 0       | 0       | 0       | 0       | 0       | 0       | 0       | 0       | 0       | 0       | 0       | 0       | 0       | 0         | 0         | 0        |
| 1.1.4.13.50 | 0        | 0        | 0        | 0       | 0       | 0       | 0       | 0       | 0       | 0       | 0       | 0       | 0       | 0       | 0       | 0       | 0       | 0         | 0         | 0        |
| 1.1.4.13.7  | 0        | 0        | 0        | 0       | 0       | 0       | 0       | 0       | 0       | 0       | 0       | 0       | 0       | 0       | 0       | 0       | 0       | 0         | 0         | 1        |
| 1.1.4.13.8  | 0        | 0        | 0        | 0       | 0       | 0       | 0       | 0       | 0       | 0       | 0       | 0       | 0       | 0       | 0       | 0       | 0       | 0         | 0         | 0        |
| 1.1.4.13.82 | 0        | 0        | 0        | 0       | 0       | 0       | 0       | 0       | 0       | 0       | 0       | 0       | 0       | 0       | 0       | 0       | 0       | 0         | 0         | 0        |
| 1.1.4.99.-  | 0        | 0        | 0        | 0       | 0       | 0       | 0       | 0       | 0       | 0       | 0       | 0       | 0       | 0       | 0       | 0       | 0       | 0         | 0         | 0        |
| 1.1.7.99.1  | 0        | 0        | 0        | 0       | 0       | 0       | 0       | 0       | 0       | 0       | 0       | 0       | 0       | 0       | 0       | 0       | 0       | 0         | 0         | 0        |
| 1.1.8.6.1   | 0        | 0        | 0        | 2       | 0       | 1       | 1       | 0       | 0       | 1       | 0       | 0       | 0       | 0       | 0       | 1       | 0       | 0         | 0         | 0        |
| 1.2.1.-     | 0        | 0        | 0        | 0       | 0       | 0       | 0       | 0       | 0       | 0       | 0       | 0       | 0       | 0       | 0       | 0       | 0       | 0         | 0         | 0        |
| 1.2.1.10    | 1        | 5        | 6        | 3       | 1       | 1       | 4       | 1       | 2       | 2       | 0       | 1       | 3       | 3       | 2       | 3       | 2       | 0         | 0         | 1        |
| 1.2.1.3     | 3        | 13       | 7        | 6       | 5       | 6       | 9       | 1       | 2       | 2       | 3       | 2       | 8       | 5       | 3       | 2       | 1       | 0         | 3         | 0        |
| 1.2.1.39    | 0        | 0        | 0        | 0       | 0       | 0       | 0       | 0       | 0       | 1       | 0       | 0       | 0       | 0       | 1       | 0       | 0       | 0         | 0         | 0        |
| 1.2.7.1     | 7        | 16       | 24       | 10      | 5       | 5       | 16      | 6       | 8       | 10      | 7       | 7       | 8       | 8       | 6       | 7       | 10      | 5         | 10        | 7        |
| 1.2.99.2    | 2        | 2        | 3        | 3       | 3       | 5       | 6       | 0       | 2       | 7       | 1       | 2       | 1       | 1       | 2       | 2       | 2       | 0         | 1         | 0        |
| 1.3.1.-     | 0        | 0        | 0        | 0       | 0       | 0       | 1       | 1       | 0       | 0       | 0       | 0       | 0       | 0       | 0       | 0       | 0       | 0         | 0         | 0        |
| 1.3.1.2     | 0        | 0        | 0        | 0       | 0       | 1       | 2       | 0       | 1       | 0       | 0       | 1       | 0       | 0       | 0       | 0       | 0       | 0         | 0         | 0        |
| 1.3.1.25    | 0        | 0        | 0        | 0       | 0       | 0       | 0       | 0       | 0       | 0       | 0       | 0       | 0       | 0       | 0       | 0       | 0       | 0         | 0         | 0        |
| 1.3.99.-    | 0        | 0        | 1        | 0       | 0       | 0       | 0       | 0       | 0       | 0       | 0       | 0       | 0       | 0       | 0       | 0       | 0       | 0         | 0         | 0        |
| 1.6.5.-     | 34       | 64       | 50       | 51      | 18      | 32      | 58      | 14      | 12      | 44      | 31      | 24      | 30      | 25      | 39      | 35      | 24      | 30        | 41        | 40       |
| 1.7.1.-     | 7        | 11       | 13       | 7       | 6       | 9       | 11      | 6       | 6       | 8       | 7       | 8       | 7       | 8       | 3       | 11      | 1       | 8         | 10        | 14       |
| 1.8.99.3    | 0        | 0        | 0        | 1       | 0       | 0       | 0       | 0       | 0       | 0       | 2       | 0       | 0       | 0       | 0       | 0       | 0       | 0         | 1         | 0        |
| 2.1.1.-     | 170      | 433      | 353      | 214     | 161     | 193     | 297     | 96      | 103     | 160     | 131     | 114     | 161     | 138     | 104     | 142     | 132     | 89        | 130       | 102      |
| 2.3.1.-     | 99       | 167      | 164      | 128     | 61      | 80      | 149     | 56      | 32      | 91      | 80      | 89      | 91      | 74      | 65      | 87      | 77      | 32        | 49        | 46       |
| 2.3.1.16    | 0        | 2        | 1        | 0       | 2       | 1       | 2       | 3       | 2       | 0       | 0       | 0       | 1       | 0       | 0       | 0       | 0       | 0         | 1         | 0        |
| 2.3.1.5     | 0        | 0        | 0        | 0       | 0       | 0       | 0       | 0       | 0       | 0       | 0       | 0       | 0       | 0       | 0       | 0       | 0       | 0         | 0         | 0        |
| 2.3.1.9     | 1        | 1        | 1        | 0       | 1       | 1       | 1       | 0       | 0       | 1       | 0       | 0       | 0       | 3       | 1       | 1       | 0       | 0         | 0         | 0        |
| 2.4.2.10    | 11       | 22       | 20       | 13      | 10      | 13      | 20      | 8       | 5       | 11      | 7       | 7       | 10      | 12      | 11      | 6       | 14      | 4         | 8         | 6        |
| 2.4.2.3     | 6        | 16       | 12       | 9       | 9       | 8       | 10      | 3       | 4       | 9       | 4       | 3       | 9       | 3       | 4       | 7       | 7       | 2         | 4         | 2        |
| 2.4.2.4     | 0        | 8        | 5        | 1       | 2       | 2       | 5       | 2       | 2       | 1       | 1       | 0       | 0       | 2       | 0       | 0       | 0       | 0         | 1         | 0        |
| 2.4.2.8     | 10       | 17       | 15       | 12      | 13      | 13      | 15      | 7       | 5       | 6       | 6       | 2       | 8       | 6       | 11      | 8       | 7       | 10        | 6         | 9        |
| 2.5.1.-     | 17       | 32       | 20       | 16      | 13      | 18      | 27      | 8       | 8       | 14      | 8       | 12      | 13      | 14      | 7       | 19      | 7       | 18        | 14        | 23       |

| EC/KO    | ES-AD-37 | ES-AD-38 | ES-AD-39 | ES-AD-4 | ES-AD-5 | ES-AD-6 | ES-AD-7 | ES-AD-8 | ES-AD-9 | FR-AD-1 | FR-AD-2 | FR-AD-3 | FR-AD-4 | FR-AD-5 | FR-AD-6 | FR-AD-7 | FR-AD-8 | IN-1660SH | IN-1660SK | IN-199SD |
|----------|----------|----------|----------|---------|---------|---------|---------|---------|---------|---------|---------|---------|---------|---------|---------|---------|---------|-----------|-----------|----------|
| 2.5.1.18 | 0        | 4        | 2        | 0       | 1       | 2       | 0       | 0       | 0       | 1       | 0       | 0       | 0       | 0       | 1       | 1       | 1       | 0         | 0         | 0        |
| 2.6.1.-  | 17       | 45       | 33       | 20      | 13      | 21      | 35      | 15      | 15      | 8       | 3       | 9       | 7       | 8       | 5       | 9       | 9       | 19        | 12        | 24       |
| 2.7.1.21 | 7        | 7        | 8        | 4       | 2       | 2       | 16      | 3       | 3       | 3       | 9       | 6       | 4       | 7       | 3       | 1       | 3       | 5         | 5         | 9        |
| 2.7.1.48 | 17       | 49       | 39       | 18      | 16      | 17      | 38      | 9       | 9       | 25      | 23      | 16      | 12      | 22      | 17      | 19      | 15      | 8         | 18        | 8        |
| 2.7.4.-  | 10       | 24       | 29       | 9       | 5       | 9       | 21      | 6       | 7       | 5       | 8       | 5       | 6       | 12      | 5       | 6       | 6       | 9         | 11        | 12       |
| 2.8.3.-  | 2        | 3        | 1        | 0       | 0       | 3       | 1       | 2       | 1       | 1       | 0       | 0       | 0       | 0       | 0       | 0       | 0       | 0         | 1         | 1        |
| 2.8.3.1  | 0        | 1        | 0        | 0       | 1       | 0       | 0       | 0       | 0       | 3       | 0       | 0       | 1       | 0       | 1       | 0       | 0       | 0         | 0         | 0        |
| 2.8.3.12 | 1        | 0        | 1        | 3       | 0       | 0       | 0       | 0       | 0       | 1       | 1       | 1       | 0       | 0       | 2       | 1       | 1       | 0         | 0         | 0        |
| 2.8.3.6  | 0        | 0        | 2        | 1       | 1       | 0       | 0       | 0       | 0       | 0       | 1       | 0       | 2       | 0       | 0       | 2       | 0       | 0         | 0         | 0        |
| 2.8.3.8  | 0        | 4        | 4        | 7       | 2       | 3       | 0       | 0       | 0       | 4       | 2       | 0       | 2       | 2       | 2       | 1       | 6       | 0         | 0         | 0        |
| 3.1.1.-  | 3        | 10       | 5        | 2       | 1       | 5       | 3       | 2       | 2       | 4       | 2       | 3       | 2       | 2       | 7       | 6       | 4       | 2         | 2         | 3        |
| 3.1.1.1  | 2        | 9        | 6        | 5       | 4       | 1       | 5       | 3       | 1       | 2       | 3       | 4       | 0       | 3       | 0       | 4       | 2       | 3         | 2         | 5        |
| 3.1.1.17 | 1        | 1        | 1        | 0       | 0       | 0       | 2       | 0       | 0       | 0       | 0       | 0       | 0       | 0       | 0       | 0       | 1       | 0         | 0         | 0        |
| 3.1.1.2  | 0        | 0        | 0        | 0       | 0       | 0       | 0       | 0       | 0       | 0       | 0       | 0       | 0       | 1       | 0       | 0       | 0       | 0         | 0         | 0        |
| 3.1.1.24 | 1        | 2        | 3        | 2       | 0       | 1       | 3       | 1       | 1       | 1       | 2       | 1       | 3       | 2       | 0       | 1       | 1       | 0         | 2         | 1        |
| 3.1.1.45 | 0        | 0        | 0        | 0       | 0       | 0       | 0       | 0       | 0       | 0       | 0       | 0       | 0       | 0       | 0       | 0       | 0       | 0         | 0         | 0        |
| 3.1.2.-  | 0        | 2        | 1        | 0       | 0       | 1       | 0       | 0       | 0       | 2       | 1       | 0       | 1       | 1       | 0       | 1       | 0       | 0         | 1         | 0        |
| 3.1.2.23 | 6        | 7        | 6        | 6       | 1       | 5       | 8       | 0       | 2       | 4       | 4       | 4       | 1       | 0       | 1       | 3       | 2       | 1         | 1         | 0        |
| 3.1.3.1  | 14       | 21       | 11       | 12      | 6       | 11      | 15      | 6       | 3       | 8       | 5       | 15      | 2       | 4       | 9       | 8       | 8       | 12        | 12        | 10       |
| 3.1.3.2  | 4        | 5        | 3        | 1       | 2       | 3       | 7       | 2       | 3       | 1       | 2       | 3       | 3       | 1       | 4       | 3       | 0       | 4         | 6         | 8        |
| 3.1.3.41 | 0        | 1        | 0        | 0       | 0       | 0       | 0       | 0       | 0       | 0       | 0       | 0       | 0       | 1       | 0       | 0       | 0       | 0         | 0         | 0        |
| 3.2.1.31 | 1        | 4        | 2        | 4       | 5       | 6       | 5       | 0       | 1       | 6       | 1       | 0       | 4       | 4       | 0       | 3       | 3       | 0         | 0         | 1        |
| 3.3.2.9  | 0        | 0        | 0        | 0       | 0       | 0       | 0       | 0       | 0       | 0       | 0       | 0       | 0       | 0       | 0       | 0       | 0       | 0         | 0         | 0        |
| 3.5.1.-  | 16       | 40       | 33       | 14      | 16      | 19      | 29      | 8       | 6       | 7       | 6       | 10      | 12      | 14      | 8       | 6       | 8       | 9         | 14        | 10       |
| 3.5.1.4  | 1        | 4        | 6        | 0       | 0       | 2       | 3       | 2       | 1       | 0       | 5       | 1       | 1       | 3       | 3       | 0       | 3       | 3         | 4         | 3        |
| 3.5.1.5  | 1        | 3        | 3        | 3       | 0       | 2       | 0       | 0       | 0       | 2       | 0       | 2       | 0       | 3       | 0       | 6       | 4       | 0         | 1         | 0        |
| 3.5.1.54 | 5        | 11       | 6        | 7       | 3       | 3       | 4       | 2       | 0       | 2       | 3       | 0       | 3       | 4       | 1       | 2       | 3       | 0         | 1         | 1        |
| 3.5.1.6  | 3        | 0        | 3        | 1       | 0       | 2       | 2       | 0       | 0       | 0       | 0       | 0       | 0       | 0       | 0       | 0       | 0       | 0         | 0         | 0        |
| 3.5.2.-  | 0        | 0        | 0        | 0       | 0       | 0       | 0       | 0       | 0       | 1       | 0       | 0       | 0       | 0       | 0       | 0       | 0       | 0         | 0         | 0        |
| 3.5.2.2  | 2        | 5        | 0        | 0       | 2       | 0       | 0       | 0       | 0       | 0       | 0       | 0       | 1       | 0       | 1       | 1       | 0       | 0         | 0         | 0        |
| 3.5.4.-  | 18       | 39       | 29       | 23      | 13      | 15      | 31      | 8       | 9       | 16      | 11      | 17      | 15      | 13      | 19      | 6       | 13      | 14        | 11        | 23       |
| 3.5.4.5  | 7        | 13       | 13       | 15      | 5       | 9       | 21      | 6       | 6       | 9       | 7       | 14      | 12      | 11      | 7       | 10      | 10      | 5         | 10        | 2        |
| 3.5.5.1  | 1        | 4        | 2        | 3       | 0       | 0       | 1       | 0       | 0       | 0       | 0       | 0       | 0       | 0       | 0       | 0       | 0       | 0         | 0         | 0        |
| 3.5.5.7  | 0        | 0        | 0        | 0       | 0       | 0       | 0       | 0       | 0       | 0       | 0       | 0       | 0       | 0       | 0       | 0       | 0       | 0         | 0         | 0        |
| 3.5.99.3 | 0        | 0        | 0        | 0       | 0       | 0       | 0       | 0       | 0       | 0       | 0       | 0       | 0       | 0       | 0       | 0       | 0       | 0         | 0         | 0        |
| 3.6.1.7  | 5        | 12       | 6        | 3       | 8       | 3       | 3       | 1       | 0       | 7       | 2       | 1       | 4       | 3       | 1       | 6       | 1       | 1         | 4         | 0        |
| 3.7.1.-  | 0        | 3        | 4        | 3       | 1       | 1       | 3       | 2       | 0       | 1       | 2       | 1       | 2       | 1       | 1       | 2       | 5       | 0         | 0         | 0        |
| 3.7.1.2  | 5        | 7        | 3        | 6       | 0       | 2       | 2       | 0       | 0       | 4       | 1       | 2       | 2       | 1       | 0       | 3       | 2       | 0         | 0         | 1        |
| 3.8.1.2  | 5        | 7        | 7        | 4       | 3       | 3       | 5       | 5       | 0       | 0       | 1       | 4       | 0       | 1       | 1       | 3       | 3       | 1         | 1         | 0        |
| 3.8.1.3  | 0        | 0        | 0        | 0       | 0       | 0       | 0       | 0       | 0       | 1       | 0       | 0       | 0       | 0       | 0       | 0       | 0       | 0         | 0         | 0        |
| 3.8.1.5  | 0        | 2        | 0        | 0       | 1       | 0       | 1       | 0       | 0       | 0       | 0       | 0       | 0       | 1       | 0       | 0       | 0       | 0         | 0         | 0        |
| 4.1.1.-  | 8        | 18       | 9        | 6       | 5       | 9       | 8       | 7       | 6       | 7       | 4       | 6       | 6       | 1       | 6       | 6       | 2       | 7         | 3         | 10       |
| 4.1.1.44 | 22       | 37       | 24       | 37      | 11      | 10      | 30      | 11      | 5       | 32      | 19      | 30      | 31      | 26      | 27      | 27      | 27      | 7         | 16        | 7        |
| 4.1.1.55 | 0        | 0        | 0        | 0       | 0       | 0       | 0       | 0       | 0       | 0       | 0       | 0       | 0       | 0       | 0       | 0       | 0       | 0         | 0         | 0        |
| 4.1.1.7  | 0        | 0        | 0        | 0       | 0       | 0       | 0       | 0       | 0       | 0       | 0       | 0       | 0       | 0       | 0       | 0       | 0       | 0         | 0         | 0        |
| 4.1.1.70 | 0        | 1        | 0        | 0       | 0       | 0       | 0       | 0       | 0       | 0       | 0       | 0       | 0       | 0       | 0       | 0       | 0       | 0         | 0         | 0        |
| 4.1.1.77 | 0        | 0        | 0        | 0       | 0       | 0       | 0       | 0       | 0       | 0       | 0       | 0       | 0       | 0       | 0       | 0       | 0       | 0         | 0         | 0        |
| 4.1.2.-  | 3        | 7        | 9        | 9       | 5       | 2       | 4       | 3       | 1       | 4       | 2       | 2       | 0       | 3       | 3       | 1       | 3       | 0         | 3         | 2        |
| 4.1.3.-  | 12       | 28       | 23       | 11      | 4       | 11      | 25      | 6       | 6       | 19      | 12      | 10      | 12      | 13      | 11      | 8       | 9       | 4         | 11        | 9        |

| EC/KO    | ES-AD-37 | ES-AD-38 | ES-AD-39 | ES-AD-4 | ES-AD-5 | ES-AD-6 | ES-AD-7 | ES-AD-8 | ES-AD-9 | FR-AD-1 | FR-AD-2 | FR-AD-3 | FR-AD-4 | FR-AD-5 | FR-AD-6 | FR-AD-7 | FR-AD-8 | IN-1660SH | IN-1660SK | IN-199SD |
|----------|----------|----------|----------|---------|---------|---------|---------|---------|---------|---------|---------|---------|---------|---------|---------|---------|---------|-----------|-----------|----------|
| 4.1.3.39 | 0        | 0        | 1        | 0       | 0       | 0       | 1       | 0       | 1       | 0       | 0       | 2       | 0       | 0       | 0       | 0       | 0       | 2         | 1         | 2        |
| 4.1.99.- | 1        | 2        | 2        | 0       | 0       | 1       | 2       | 1       | 2       | 0       | 0       | 0       | 0       | 2       | 0       | 1       | 1       | 0         | 0         | 0        |
| 4.2.1.-  | 35       | 68       | 53       | 45      | 19      | 33      | 52      | 15      | 13      | 28      | 13      | 18      | 25      | 19      | 25      | 26      | 18      | 10        | 20        | 20       |
| 4.2.1.17 | 9        | 6        | 9        | 2       | 4       | 4       | 8       | 4       | 3       | 7       | 2       | 4       | 2       | 4       | 1       | 5       | 3       | 2         | 5         | 1        |
| 4.2.1.80 | 0        | 0        | 0        | 0       | 0       | 0       | 0       | 0       | 0       | 0       | 0       | 0       | 0       | 0       | 0       | 0       | 0       | 0         | 0         | 0        |
| 4.2.1.83 | 1        | 0        | 1        | 1       | 1       | 0       | 1       | 0       | 0       | 0       | 0       | 0       | 1       | 1       | 1       | 0       | 2       | 0         | 0         | 0        |
| 4.2.1.84 | 1        | 0        | 1        | 0       | 1       | 0       | 0       | 0       | 0       | 0       | 0       | 0       | 0       | 0       | 0       | 0       | 1       | 0         | 0         | 0        |
| 5.1.2.2  | 0        | 0        | 0        | 0       | 0       | 0       | 0       | 0       | 0       | 0       | 0       | 0       | 0       | 0       | 0       | 0       | 0       | 0         | 0         | 0        |
| 5.2.1.2  | 0        | 0        | 0        | 0       | 0       | 0       | 0       | 0       | 0       | 0       | 0       | 0       | 0       | 0       | 0       | 0       | 0       | 0         | 0         | 0        |
| 5.3.3.4  | 0        | 0        | 0        | 0       | 0       | 1       | 0       | 0       | 0       | 0       | 0       | 0       | 0       | 0       | 0       | 0       | 0       | 0         | 0         | 0        |
| 5.3.99.- | 2        | 4        | 4        | 5       | 3       | 1       | 2       | 0       | 0       | 2       | 1       | 1       | 4       | 5       | 2       | 2       | 4       | 0         | 0         | 0        |
| 5.4.99.- | 0        | 1        | 0        | 2       | 0       | 0       | 0       | 0       | 0       | 1       | 1       | 0       | 0       | 1       | 0       | 0       | 0       | 0         | 0         | 1        |
| 5.5.1.1  | 2        | 3        | 4        | 2       | 1       | 2       | 3       | 1       | 0       | 0       | 1       | 1       | 0       | 0       | 0       | 0       | 0       | 0         | 0         | 0        |
| 5.5.1.2  | 0        | 0        | 0        | 0       | 0       | 0       | 0       | 0       | 0       | 0       | 0       | 0       | 0       | 0       | 0       | 0       | 0       | 0         | 0         | 0        |
| 6.2.1.-  | 0        | 0        | 0        | 0       | 0       | 0       | 0       | 0       | 0       | 0       | 0       | 0       | 0       | 0       | 0       | 0       | 0       | 0         | 0         | 0        |
| 6.3.5.2  | 13       | 31       | 26       | 17      | 8       | 12      | 22      | 9       | 4       | 8       | 3       | 4       | 6       | 10      | 5       | 8       | 7       | 5         | 9         | 11       |
| K00002   | 3        | 2        | 4        | 0       | 0       | 3       | 0       | 2       | 0       | 1       | 0       | 0       | 1       | 0       | 0       | 0       | 0       | 0         | 0         | 0        |
| K00055   | 0        | 0        | 0        | 0       | 0       | 0       | 0       | 0       | 0       | 1       | 0       | 0       | 0       | 0       | 0       | 0       | 0       | 0         | 0         | 0        |
| K00074   | 1        | 10       | 7        | 6       | 1       | 3       | 6       | 3       | 1       | 9       | 6       | 1       | 3       | 3       | 6       | 2       | 5       | 1         | 2         | 0        |
| K00088   | 13       | 19       | 16       | 15      | 7       | 16      | 18      | 7       | 7       | 10      | 9       | 8       | 3       | 5       | 6       | 7       | 5       | 10        | 12        | 13       |
| K00100   | 41       | 70       | 63       | 42      | 28      | 19      | 52      | 18      | 16      | 36      | 19      | 29      | 20      | 30      | 27      | 18      | 19      | 20        | 22        | 22       |
| K00128   | 0        | 2        | 2        | 0       | 1       | 1       | 4       | 1       | 1       | 1       | 0       | 0       | 1       | 0       | 0       | 0       | 0       | 0         | 0         | 0        |
| K00129   | 0        | 0        | 0        | 0       | 0       | 0       | 0       | 0       | 0       | 0       | 0       | 0       | 0       | 0       | 0       | 0       | 0       | 0         | 0         | 0        |
| K00132   | 0        | 1        | 0        | 0       | 0       | 1       | 0       | 1       | 0       | 0       | 0       | 0       | 0       | 0       | 0       | 0       | 0       | 0         | 0         | 0        |
| K00141   | 0        | 0        | 0        | 0       | 0       | 0       | 0       | 0       | 0       | 0       | 0       | 0       | 0       | 0       | 0       | 0       | 0       | 0         | 0         | 0        |
| K00146   | 0        | 0        | 0        | 0       | 0       | 0       | 0       | 0       | 0       | 0       | 0       | 0       | 0       | 0       | 0       | 0       | 0       | 0         | 0         | 0        |
| K00148   | 0        | 0        | 0        | 0       | 0       | 0       | 0       | 0       | 0       | 0       | 0       | 0       | 0       | 0       | 0       | 0       | 0       | 0         | 0         | 0        |
| K00155   | 1        | 0        | 0        | 1       | 0       | 0       | 0       | 0       | 0       | 0       | 0       | 0       | 0       | 0       | 0       | 0       | 0       | 0         | 0         | 0        |
| K00169   | 1        | 6        | 2        | 0       | 3       | 0       | 1       | 0       | 1       | 0       | 1       | 0       | 0       | 0       | 0       | 0       | 0       | 0         | 2         | 0        |
| K00224   | 1        | 1        | 0        | 0       | 0       | 0       | 0       | 0       | 0       | 0       | 0       | 0       | 0       | 0       | 0       | 1       | 0       | 0         | 0         | 0        |
| K00274   | 0        | 0        | 0        | 0       | 0       | 0       | 0       | 0       | 0       | 0       | 0       | 0       | 0       | 0       | 0       | 0       | 0       | 0         | 0         | 0        |
| K00446   | 0        | 0        | 0        | 0       | 0       | 0       | 0       | 0       | 0       | 0       | 0       | 0       | 0       | 0       | 0       | 0       | 0       | 0         | 0         | 0        |
| K00448   | 0        | 0        | 0        | 0       | 0       | 0       | 0       | 0       | 0       | 0       | 0       | 0       | 0       | 0       | 0       | 0       | 0       | 0         | 0         | 0        |
| K00462   | 1        | 0        | 1        | 0       | 0       | 0       | 0       | 1       | 0       | 0       | 0       | 0       | 0       | 0       | 0       | 0       | 0       | 0         | 0         | 0        |
| K00480   | 0        | 0        | 0        | 0       | 0       | 0       | 0       | 0       | 0       | 0       | 0       | 0       | 0       | 0       | 0       | 0       | 0       | 0         | 0         | 0        |
| K00481   | 0        | 0        | 0        | 0       | 0       | 0       | 0       | 0       | 0       | 0       | 0       | 0       | 0       | 0       | 0       | 0       | 0       | 0         | 0         | 0        |
| K00539   | 1        | 0        | 0        | 0       | 0       | 0       | 0       | 0       | 0       | 0       | 0       | 1       | 0       | 0       | 0       | 0       | 0       | 0         | 1         | 0        |
| K00599   | 44       | 73       | 59       | 20      | 31      | 24      | 48      | 13      | 21      | 18      | 14      | 18      | 22      | 19      | 15      | 16      | 13      | 19        | 21        | 25       |
| K00626   | 2        | 4        | 1        | 2       | 3       | 4       | 3       | 4       | 3       | 1       | 0       | 0       | 1       | 4       | 3       | 0       | 0       | 0         | 2         | 1        |
| K00632   | 0        | 0        | 0        | 0       | 0       | 0       | 0       | 0       | 0       | 0       | 0       | 0       | 0       | 0       | 0       | 0       | 0       | 0         | 0         | 0        |
| K00680   | 22       | 53       | 34       | 33      | 27      | 19      | 34      | 15      | 12      | 31      | 21      | 21      | 28      | 18      | 11      | 21      | 18      | 10        | 15        | 19       |
| K00757   | 13       | 15       | 11       | 12      | 7       | 8       | 13      | 6       | 4       | 12      | 7       | 2       | 5       | 6       | 5       | 9       | 4       | 8         | 5         | 10       |
| K00758   | 3        | 4        | 7        | 8       | 0       | 1       | 4       | 0       | 1       | 0       | 1       | 1       | 5       | 4       | 0       | 2       | 1       | 0         | 2         | 1        |
| K00760   | 15       | 26       | 33       | 27      | 16      | 17      | 26      | 15      | 7       | 14      | 11      | 12      | 15      | 15      | 15      | 11      | 11      | 6         | 6         | 2        |
| K00799   | 0        | 0        | 0        | 0       | 0       | 0       | 1       | 0       | 0       | 1       | 0       | 0       | 0       | 0       | 1       | 0       | 0       | 0         | 1         | 0        |
| K00857   | 8        | 11       | 15       | 10      | 4       | 3       | 16      | 4       | 4       | 6       | 12      | 6       | 9       | 9       | 5       | 2       | 10      | 6         | 8         | 8        |
| K00876   | 18       | 36       | 29       | 21      | 12      | 18      | 33      | 11      | 10      | 16      | 16      | 15      | 7       | 14      | 8       | 10      | 8       | 18        | 22        | 23       |
| K01026   | 0        | 1        | 1        | 0       | 2       | 1       | 0       | 0       | 0       | 0       | 2       | 1       | 1       | 0       | 0       | 0       | 2       | 0         | 0         | 0        |
| K01031   | 0        | 0        | 0        | 0       | 0       | 0       | 0       | 0       | 0       | 0       | 0       | 0       | 0       | 0       | 0       | 0       | 0       | 0         | 0         | 0        |

| EC/KO  | ES-AD-37 | ES-AD-38 | ES-AD-39 | ES-AD-4 | ES-AD-5 | ES-AD-6 | ES-AD-7 | ES-AD-8 | ES-AD-9 | FR-AD-1 | FR-AD-2 | FR-AD-3 | FR-AD-4 | FR-AD-5 | FR-AD-6 | FR-AD-7 | FR-AD-8 | IN-1660SH | IN-1660SK | IN-199SD |
|--------|----------|----------|----------|---------|---------|---------|---------|---------|---------|---------|---------|---------|---------|---------|---------|---------|---------|-----------|-----------|----------|
| K01034 | 1        | 2        | 0        | 2       | 0       | 0       | 0       | 0       | 0       | 1       | 2       | 1       | 2       | 0       | 0       | 1       | 2       | 0         | 0         | 1        |
| K01039 | 0        | 1        | 1        | 0       | 0       | 0       | 0       | 0       | 0       | 1       | 1       | 1       | 0       | 0       | 2       | 0       | 0       | 0         | 0         | 0        |
| K01041 | 8        | 6        | 3        | 3       | 3       | 1       | 10      | 2       | 1       | 3       | 1       | 5       | 0       | 1       | 1       | 3       | 0       | 5         | 2         | 5        |
| K01053 | 0        | 0        | 0        | 0       | 0       | 0       | 0       | 0       | 0       | 0       | 0       | 0       | 0       | 0       | 0       | 0       | 0       | 0         | 0         | 0        |
| K01055 | 0        | 0        | 0        | 0       | 0       | 0       | 0       | 0       | 0       | 0       | 0       | 0       | 0       | 0       | 0       | 0       | 0       | 0         | 0         | 0        |
| K01061 | 0        | 0        | 0        | 0       | 0       | 0       | 0       | 0       | 0       | 0       | 0       | 0       | 1       | 0       | 0       | 0       | 0       | 0         | 0         | 0        |
| K01066 | 3        | 11       | 7        | 5       | 5       | 1       | 6       | 2       | 1       | 4       | 3       | 4       | 0       | 3       | 2       | 2       | 2       | 2         | 1         | 2        |
| K01075 | 2        | 0        | 0        | 1       | 0       | 1       | 0       | 0       | 0       | 0       | 0       | 0       | 0       | 0       | 0       | 1       | 0       | 0         | 2         | 0        |
| K01077 | 7        | 8        | 7        | 8       | 1       | 4       | 6       | 1       | 0       | 3       | 3       | 5       | 1       | 0       | 0       | 1       | 0       | 0         | 1         | 0        |
| K01101 | 0        | 7        | 8        | 3       | 4       | 3       | 3       | 2       | 1       | 3       | 2       | 0       | 1       | 4       | 1       | 1       | 4       | 0         | 1         | 0        |
| K01195 | 2        | 7        | 7        | 4       | 5       | 4       | 14      | 0       | 2       | 3       | 1       | 2       | 3       | 2       | 1       | 5       | 0       | 0         | 1         | 1        |
| K01426 | 0        | 2        | 3        | 0       | 0       | 0       | 0       | 0       | 0       | 1       | 1       | 0       | 0       | 0       | 1       | 0       | 0       | 0         | 0         | 0        |
| K01428 | 1        | 3        | 0        | 0       | 0       | 0       | 0       | 0       | 0       | 0       | 0       | 2       | 0       | 1       | 0       | 0       | 0       | 0         | 1         | 0        |
| K01457 | 0        | 0        | 0        | 0       | 0       | 1       | 0       | 0       | 0       | 0       | 0       | 0       | 0       | 0       | 0       | 0       | 0       | 0         | 0         | 0        |
| K01464 | 2        | 7        | 3        | 0       | 4       | 0       | 0       | 0       | 0       | 0       | 1       | 0       | 0       | 0       | 1       | 2       | 2       | 0         | 0         | 0        |
| K01489 | 10       | 19       | 22       | 21      | 9       | 10      | 23      | 7       | 8       | 13      | 13      | 16      | 13      | 14      | 12      | 10      | 11      | 7         | 9         | 9        |
| K01500 | 0        | 0        | 0        | 4       | 0       | 0       | 0       | 0       | 0       | 0       | 0       | 0       | 0       | 0       | 0       | 0       | 0       | 0         | 0         | 0        |
| K01501 | 2        | 3        | 8        | 3       | 0       | 0       | 1       | 0       | 0       | 0       | 0       | 0       | 0       | 0       | 0       | 0       | 0       | 0         | 0         | 0        |
| K01502 | 0        | 0        | 0        | 0       | 0       | 0       | 0       | 0       | 0       | 0       | 0       | 0       | 0       | 0       | 0       | 0       | 0       | 0         | 0         | 0        |
| K01512 | 6        | 21       | 15       | 8       | 9       | 5       | 6       | 2       | 1       | 11      | 2       | 2       | 7       | 6       | 6       | 8       | 3       | 2         | 5         | 0        |
| K01560 | 1        | 10       | 10       | 7       | 6       | 6       | 6       | 1       | 1       | 4       | 3       | 2       | 4       | 7       | 3       | 1       | 3       | 1         | 2         | 1        |
| K01561 | 0        | 1        | 0        | 0       | 1       | 0       | 0       | 0       | 0       | 1       | 0       | 0       | 0       | 0       | 0       | 0       | 0       | 0         | 0         | 0        |
| K01563 | 0        | 0        | 0        | 0       | 0       | 0       | 0       | 0       | 0       | 0       | 0       | 0       | 0       | 0       | 0       | 0       | 0       | 0         | 0         | 0        |
| K01564 | 2        | 2        | 2        | 2       | 0       | 1       | 0       | 0       | 0       | 0       | 0       | 0       | 0       | 0       | 0       | 0       | 0       | 0         | 0         | 0        |
| K01607 | 10       | 17       | 8        | 15      | 5       | 6       | 10      | 3       | 3       | 12      | 4       | 11      | 13      | 12      | 9       | 16      | 11      | 4         | 6         | 7        |
| K01612 | 0        | 1        | 0        | 0       | 0       | 1       | 0       | 0       | 0       | 0       | 0       | 0       | 0       | 0       | 0       | 0       | 0       | 0         | 0         | 0        |
| K01615 | 16       | 14       | 15       | 8       | 4       | 6       | 15      | 5       | 1       | 8       | 1       | 3       | 4       | 4       | 1       | 3       | 1       | 7         | 8         | 7        |
| K01617 | 0        | 0        | 0        | 0       | 0       | 0       | 0       | 0       | 0       | 0       | 0       | 0       | 0       | 0       | 0       | 0       | 0       | 0         | 0         | 0        |
| K01666 | 2        | 6        | 3        | 2       | 2       | 2       | 7       | 4       | 5       | 1       | 1       | 2       | 1       | 1       | 0       | 2       | 0       | 2         | 1         | 2        |
| K01692 | 0        | 0        | 1        | 0       | 0       | 0       | 0       | 0       | 0       | 1       | 0       | 0       | 0       | 0       | 0       | 0       | 0       | 0         | 1         | 0        |
| K01721 | 0        | 0        | 0        | 0       | 0       | 0       | 0       | 0       | 0       | 0       | 0       | 0       | 0       | 0       | 0       | 0       | 0       | 0         | 0         | 0        |
| K01726 | 9        | 15       | 10       | 2       | 3       | 6       | 8       | 1       | 2       | 0       | 1       | 1       | 0       | 3       | 2       | 2       | 0       | 4         | 3         | 8        |
| K01781 | 0        | 0        | 0        | 1       | 2       | 0       | 0       | 0       | 0       | 0       | 0       | 0       | 0       | 0       | 0       | 0       | 0       | 0         | 0         | 0        |
| K01821 | 1        | 2        | 0        | 0       | 0       | 4       | 2       | 2       | 0       | 0       | 0       | 0       | 0       | 0       | 2       | 0       | 0       | 0         | 0         | 1        |
| K01856 | 0        | 0        | 0        | 0       | 0       | 0       | 0       | 0       | 0       | 0       | 0       | 0       | 0       | 0       | 0       | 0       | 0       | 0         | 0         | 0        |
| K01857 | 0        | 0        | 1        | 0       | 0       | 0       | 0       | 0       | 0       | 0       | 0       | 0       | 0       | 0       | 0       | 0       | 0       | 0         | 0         | 0        |
| K01913 | 0        | 0        | 0        | 1       | 0       | 1       | 0       | 0       | 0       | 0       | 0       | 0       | 0       | 0       | 0       | 0       | 0       | 0         | 0         | 0        |
| K01951 | 9        | 25       | 14       | 10      | 5       | 9       | 14      | 6       | 4       | 8       | 3       | 2       | 2       | 4       | 7       | 8       | 2       | 5         | 7         | 10       |
| K02554 | 0        | 0        | 0        | 0       | 0       | 0       | 0       | 0       | 0       | 0       | 0       | 0       | 0       | 0       | 0       | 0       | 0       | 0         | 0         | 0        |
| K03381 | 0        | 0        | 0        | 0       | 0       | 0       | 0       | 0       | 0       | 0       | 0       | 0       | 0       | 0       | 0       | 0       | 0       | 0         | 0         | 0        |
| K03382 | 0        | 1        | 5        | 3       | 0       | 2       | 1       | 0       | 0       | 0       | 0       | 0       | 0       | 0       | 0       | 0       | 0       | 0         | 0         | 0        |
| K03464 | 0        | 0        | 0        | 0       | 0       | 0       | 0       | 0       | 0       | 0       | 0       | 0       | 0       | 0       | 0       | 0       | 0       | 0         | 0         | 0        |
| K03518 | 11       | 21       | 18       | 19      | 11      | 7       | 7       | 4       | 3       | 15      | 11      | 9       | 10      | 13      | 11      | 10      | 12      | 1         | 5         | 1        |
| K03862 | 0        | 0        | 0        | 0       | 0       | 0       | 0       | 0       | 0       | 0       | 0       | 0       | 0       | 0       | 0       | 0       | 0       | 0         | 0         | 0        |
| K04099 | 0        | 0        | 0        | 0       | 0       | 0       | 0       | 0       | 0       | 0       | 0       | 0       | 0       | 0       | 0       | 0       | 0       | 0         | 0         | 0        |
| K04100 | 0        | 0        | 0        | 0       | 0       | 0       | 0       | 0       | 0       | 0       | 0       | 0       | 0       | 0       | 0       | 0       | 0       | 0         | 0         | 0        |
| K04102 | 0        | 0        | 0        | 0       | 0       | 0       | 0       | 0       | 0       | 0       | 0       | 0       | 0       | 0       | 0       | 0       | 0       | 0         | 0         | 0        |
| K04116 | 0        | 0        | 0        | 0       | 0       | 0       | 0       | 0       | 0       | 0       | 0       | 0       | 0       | 0       | 0       | 0       | 0       | 0         | 0         | 0        |
| K05394 | 1        | 0        | 1        | 0       | 0       | 0       | 0       | 0       | 0       | 0       | 0       | 0       | 0       | 0       | 0       | 0       | 0       | 1         | 0         | 1        |



| EC/KO  | ES-AD-37 | ES-AD-38 | ES-AD-39 | ES-AD-4 | ES-AD-5 | ES-AD-6 | ES-AD-7 | ES-AD-8 | ES-AD-9 | FR-AD-1 | FR-AD-2 | FR-AD-3 | FR-AD-4 | FR-AD-5 | FR-AD-6 | FR-AD-7 | FR-AD-8 | IN-1660SH | IN-1660SK | IN-199SD |
|--------|----------|----------|----------|---------|---------|---------|---------|---------|---------|---------|---------|---------|---------|---------|---------|---------|---------|-----------|-----------|----------|
| K05549 | 0        | 0        | 0        | 0       | 0       | 0       | 0       | 0       | 0       | 0       | 0       | 0       | 0       | 0       | 0       | 0       | 0       | 0         | 0         | 0        |
| K05783 | 0        | 0        | 0        | 0       | 0       | 0       | 0       | 0       | 0       | 0       | 0       | 0       | 0       | 0       | 0       | 0       | 0       | 0         | 0         | 0        |
| K05797 | 0        | 0        | 0        | 0       | 0       | 0       | 0       | 0       | 0       | 0       | 0       | 0       | 0       | 0       | 0       | 0       | 0       | 0         | 0         | 0        |
| K06281 | 2        | 2        | 3        | 1       | 0       | 0       | 1       | 1       | 0       | 0       | 1       | 0       | 0       | 0       | 0       | 0       | 0       | 0         | 0         | 0        |
| K06446 | 5        | 2        | 4        | 13      | 4       | 1       | 3       | 1       | 3       | 8       | 3       | 2       | 3       | 4       | 4       | 4       | 1       | 0         | 4         | 1        |
| K06912 | 0        | 0        | 0        | 0       | 0       | 0       | 0       | 0       | 0       | 0       | 0       | 0       | 0       | 0       | 0       | 0       | 0       | 0         | 0         | 0        |
| K07535 | 0        | 0        | 0        | 0       | 0       | 0       | 1       | 0       | 0       | 0       | 0       | 0       | 0       | 0       | 0       | 1       | 0       | 0         | 0         | 0        |
| K07536 | 1        | 5        | 5        | 3       | 0       | 1       | 1       | 0       | 2       | 1       | 3       | 5       | 1       | 0       | 2       | 1       | 1       | 5         | 5         | 6        |
| K08689 | 0        | 0        | 0        | 0       | 0       | 0       | 0       | 0       | 0       | 0       | 0       | 0       | 0       | 0       | 0       | 0       | 0       | 0         | 0         | 0        |
| K08710 | 0        | 0        | 0        | 0       | 0       | 0       | 0       | 0       | 0       | 0       | 0       | 0       | 0       | 0       | 0       | 0       | 0       | 0         | 0         | 0        |
| K09461 | 0        | 1        | 0        | 0       | 0       | 0       | 0       | 0       | 0       | 1       | 1       | 0       | 0       | 0       | 0       | 0       | 0       | 0         | 0         | 0        |
| K10217 | 0        | 0        | 0        | 0       | 0       | 0       | 0       | 0       | 0       | 0       | 0       | 0       | 0       | 0       | 1       | 0       | 0       | 0         | 0         | 0        |
| K10218 | 0        | 0        | 0        | 1       | 0       | 0       | 1       | 1       | 0       | 0       | 0       | 0       | 1       | 1       | 1       | 0       | 0       | 0         | 0         | 0        |
| K10220 | 0        | 0        | 0        | 0       | 0       | 0       | 0       | 0       | 0       | 0       | 0       | 0       | 0       | 0       | 0       | 0       | 0       | 0         | 0         | 0        |
| K11180 | 0        | 0        | 0        | 0       | 0       | 0       | 0       | 0       | 0       | 0       | 0       | 0       | 0       | 0       | 0       | 1       | 1       | 0         | 0         | 0        |
| K13953 | 0        | 0        | 0        | 0       | 0       | 1       | 0       | 0       | 0       | 1       | 0       | 0       | 0       | 0       | 1       | 0       | 0       | 0         | 0         | 0        |
| K14333 | 0        | 0        | 0        | 0       | 0       | 0       | 0       | 0       | 0       | 0       | 0       | 0       | 0       | 0       | 0       | 0       | 0       | 0         | 0         | 0        |
| K14519 | 0        | 0        | 0        | 0       | 0       | 0       | 0       | 0       | 0       | 0       | 0       | 0       | 0       | 0       | 0       | 0       | 0       | 0         | 0         | 0        |
| K15054 | 0        | 0        | 0        | 0       | 0       | 0       | 0       | 0       | 0       | 0       | 0       | 0       | 0       | 0       | 0       | 0       | 0       | 0         | 0         | 0        |
| K16173 | 0        | 1        | 0        | 0       | 1       | 0       | 0       | 0       | 0       | 0       | 0       | 0       | 1       | 0       | 0       | 0       | 0       | 0         | 0         | 0        |
| K16514 | 0        | 0        | 0        | 0       | 0       | 0       | 0       | 0       | 0       | 0       | 0       | 0       | 0       | 0       | 0       | 0       | 0       | 0         | 0         | 0        |
| K16874 | 0        | 1        | 0        | 1       | 0       | 0       | 0       | 0       | 0       | 0       | 0       | 0       | 0       | 0       | 0       | 0       | 0       | 0         | 0         | 0        |

| EC/KO       | IN-199SUBD | IN-683PD | IN-683RD | IN-882AK | IN-882RK | IN-976AB | IN-976DB | IN-A1 | IN-AA6 | IN-DB2 | IN-IS8 | IN-LB1 | IN-SAK7 | IN-SH3 | IN-SK5 | IN-SOH4 | IN-U2 | IT-AD-1 | IT-AD-2 | IT-AD-3 | IT-AD-4 | IT-AD-5 |
|-------------|------------|----------|----------|----------|----------|----------|----------|-------|--------|--------|--------|--------|---------|--------|--------|---------|-------|---------|---------|---------|---------|---------|
| 1.1.1.-     | 16         | 5        | 20       | 31       | 21       | 34       | 25       | 8     | 25     | 23     | 20     | 16     | 10      | 34     | 19     | 18      | 24    | 37      | 41      | 31      | 26      | 31      |
| 1.1.1.1     | 4          | 3        | 7        | 18       | 15       | 18       | 11       | 8     | 11     | 4      | 13     | 8      | 3       | 9      | 7      | 8       | 8     | 14      | 26      | 25      | 23      | 15      |
| 1.1.1.157   | 0          | 0        | 0        | 0        | 2        | 0        | 0        | 0     | 0      | 0      | 0      | 0      | 0       | 1      | 0      | 0       | 0     | 0       | 1       | 0       | 1       | 1       |
| 1.1.1.205   | 11         | 5        | 13       | 22       | 14       | 19       | 15       | 2     | 14     | 17     | 16     | 12     | 10      | 12     | 16     | 13      | 13    | 9       | 6       | 13      | 7       | 11      |
| 1.1.1.35    | 0          | 0        | 0        | 1        | 0        | 3        | 0        | 1     | 0      | 0      | 0      | 0      | 0       | 0      | 0      | 0       | 0     | 0       | 3       | 2       | 3       | 4       |
| 1.1.2.99.6  | 0          | 1        | 0        | 2        | 1        | 0        | 0        | 2     | 1      | 0      | 0      | 0      | 0       | 2      | 0      | 1       | 0     | 0       | 0       | 1       | 0       | 1       |
| 1.1.3.11.-  | 0          | 0        | 0        | 0        | 0        | 0        | 0        | 0     | 0      | 0      | 0      | 0      | 0       | 0      | 0      | 0       | 0     | 0       | 0       | 0       | 0       | 0       |
| 1.1.3.11.1  | 0          | 0        | 0        | 0        | 0        | 0        | 0        | 0     | 0      | 0      | 0      | 0      | 0       | 0      | 0      | 0       | 0     | 0       | 0       | 0       | 0       | 0       |
| 1.1.3.11.2  | 0          | 0        | 0        | 0        | 0        | 0        | 0        | 0     | 0      | 0      | 0      | 0      | 0       | 0      | 0      | 0       | 0     | 0       | 0       | 1       | 0       | 0       |
| 1.1.3.11.3  | 0          | 0        | 0        | 0        | 0        | 0        | 0        | 0     | 0      | 0      | 0      | 0      | 0       | 0      | 0      | 0       | 0     | 0       | 1       | 0       | 0       | 0       |
| 1.1.3.11.39 | 0          | 0        | 0        | 0        | 0        | 0        | 0        | 0     | 0      | 0      | 0      | 0      | 0       | 0      | 0      | 0       | 0     | 0       | 0       | 0       | 0       | 0       |
| 1.1.3.11.5  | 0          | 0        | 0        | 0        | 0        | 0        | 0        | 0     | 0      | 0      | 0      | 0      | 0       | 0      | 0      | 0       | 0     | 0       | 0       | 0       | 0       | 0       |
| 1.1.3.11.8  | 0          | 0        | 0        | 0        | 0        | 0        | 0        | 0     | 0      | 0      | 0      | 0      | 0       | 0      | 0      | 0       | 0     | 0       | 1       | 0       | 0       | 0       |
| 1.1.4.12.10 | 0          | 0        | 0        | 1        | 0        | 0        | 0        | 0     | 0      | 0      | 0      | 0      | 0       | 1      | 0      | 0       | 0     | 1       | 0       | 0       | 0       | 0       |
| 1.1.4.12.13 | 0          | 0        | 0        | 0        | 0        | 0        | 0        | 0     | 0      | 0      | 0      | 0      | 0       | 0      | 0      | 0       | 0     | 0       | 0       | 0       | 0       | 0       |
| 1.1.4.12.18 | 0          | 0        | 0        | 0        | 0        | 0        | 0        | 0     | 0      | 0      | 0      | 0      | 0       | 0      | 0      | 0       | 0     | 0       | 0       | 0       | 0       | 0       |
| 1.1.4.13.-  | 0          | 0        | 0        | 2        | 0        | 0        | 0        | 3     | 2      | 0      | 0      | 0      | 0       | 1      | 0      | 0       | 0     | 1       | 4       | 1       | 0       | 0       |
| 1.1.4.13.1  | 0          | 0        | 0        | 0        | 0        | 0        | 0        | 0     | 0      | 0      | 0      | 0      | 0       | 0      | 0      | 0       | 0     | 0       | 1       | 0       | 0       | 0       |
| 1.1.4.13.2  | 0          | 0        | 0        | 0        | 0        | 0        | 0        | 0     | 0      | 0      | 0      | 0      | 0       | 0      | 0      | 0       | 0     | 0       | 1       | 0       | 0       | 0       |
| 1.1.4.13.50 | 0          | 0        | 0        | 0        | 0        | 0        | 0        | 0     | 0      | 0      | 0      | 0      | 0       | 0      | 0      | 0       | 0     | 0       | 0       | 0       | 0       | 0       |
| 1.1.4.13.7  | 1          | 0        | 0        | 0        | 0        | 0        | 0        | 0     | 0      | 0      | 0      | 1      | 0       | 0      | 0      | 0       | 0     | 0       | 0       | 0       | 0       | 0       |
| 1.1.4.13.8  | 0          | 0        | 0        | 0        | 1        | 0        | 0        | 0     | 0      | 0      | 0      | 0      | 0       | 0      | 0      | 0       | 0     | 0       | 0       | 1       | 0       | 1       |
| 1.1.4.13.82 | 0          | 0        | 0        | 0        | 0        | 0        | 0        | 0     | 0      | 0      | 0      | 0      | 0       | 0      | 0      | 0       | 0     | 0       | 1       | 0       | 0       | 0       |
| 1.1.4.99.-  | 0          | 0        | 0        | 0        | 0        | 0        | 0        | 0     | 0      | 0      | 0      | 0      | 0       | 0      | 0      | 0       | 0     | 0       | 0       | 0       | 0       | 0       |
| 1.1.7.99.1  | 0          | 0        | 0        | 0        | 0        | 0        | 0        | 0     | 0      | 0      | 0      | 0      | 0       | 0      | 0      | 0       | 0     | 0       | 0       | 0       | 0       | 0       |
| 1.1.8.6.1   | 0          | 0        | 0        | 0        | 0        | 0        | 0        | 0     | 0      | 0      | 0      | 0      | 0       | 1      | 0      | 0       | 0     | 0       | 0       | 0       | 0       | 0       |
| 1.2.1.-     | 0          | 0        | 0        | 0        | 0        | 1        | 0        | 1     | 0      | 0      | 1      | 0      | 0       | 2      | 0      | 0       | 0     | 2       | 4       | 2       | 0       | 0       |
| 1.2.1.10    | 0          | 1        | 2        | 2        | 3        | 3        | 0        | 1     | 0      | 0      | 0      | 0      | 0       | 2      | 0      | 1       | 0     | 4       | 3       | 1       | 1       | 3       |
| 1.2.1.3     | 0          | 0        | 2        | 3        | 7        | 4        | 0        | 3     | 7      | 2      | 4      | 0      | 1       | 4      | 0      | 2       | 0     | 10      | 10      | 3       | 2       | 4       |
| 1.2.1.39    | 0          | 0        | 0        | 0        | 0        | 0        | 0        | 0     | 0      | 0      | 0      | 0      | 0       | 1      | 0      | 0       | 0     | 0       | 0       | 0       | 0       | 0       |
| 1.2.7.1     | 4          | 1        | 9        | 11       | 3        | 11       | 12       | 0     | 9      | 7      | 11     | 9      | 3       | 8      | 11     | 8       | 8     | 6       | 11      | 12      | 3       | 8       |
| 1.2.99.2    | 1          | 0        | 0        | 0        | 6        | 1        | 0        | 0     | 1      | 1      | 1      | 0      | 0       | 3      | 0      | 0       | 0     | 5       | 1       | 3       | 0       | 8       |
| 1.3.1.-     | 0          | 0        | 0        | 0        | 0        | 0        | 0        | 0     | 0      | 0      | 0      | 0      | 0       | 0      | 0      | 0       | 0     | 0       | 0       | 0       | 0       | 0       |
| 1.3.1.2     | 0          | 0        | 0        | 1        | 0        | 0        | 0        | 1     | 0      | 0      | 0      | 0      | 0       | 0      | 0      | 0       | 0     | 0       | 0       | 0       | 0       | 0       |
| 1.3.1.25    | 0          | 0        | 0        | 0        | 0        | 0        | 0        | 0     | 0      | 0      | 0      | 0      | 0       | 0      | 0      | 0       | 0     | 0       | 1       | 1       | 0       | 0       |
| 1.3.99.-    | 0          | 0        | 0        | 0        | 0        | 0        | 0        | 0     | 1      | 0      | 0      | 0      | 0       | 1      | 0      | 0       | 0     | 0       | 0       | 0       | 0       | 1       |
| 1.6.5.-     | 30         | 5        | 40       | 41       | 11       | 28       | 43       | 0     | 39     | 56     | 32     | 36     | 16      | 30     | 53     | 38      | 27    | 22      | 31      | 33      | 16      | 30      |
| 1.7.1.-     | 5          | 4        | 10       | 15       | 5        | 8        | 10       | 2     | 5      | 11     | 10     | 11     | 5       | 10     | 12     | 10      | 9     | 4       | 2       | 6       | 5       | 10      |
| 1.8.99.3    | 0          | 0        | 1        | 0        | 0        | 0        | 1        | 0     | 2      | 0      | 0      | 0      | 0       | 0      | 1      | 0       | 0     | 1       | 0       | 0       | 0       | 0       |
| 2.1.1.-     | 100        | 39       | 99       | 136      | 86       | 138      | 100      | 35    | 138    | 100    | 125    | 83     | 58      | 91     | 113    | 82      | 103   | 109     | 152     | 140     | 89      | 149     |
| 2.3.1.-     | 30         | 16       | 50       | 66       | 35       | 64       | 35       | 10    | 54     | 52     | 55     | 42     | 20      | 51     | 55     | 42      | 45    | 79      | 78      | 70      | 42      | 75      |
| 2.3.1.16    | 0          | 0        | 1        | 1        | 1        | 0        | 0        | 0     | 0      | 0      | 2      | 0      | 0       | 1      | 1      | 0       | 0     | 1       | 1       | 0       | 0       | 0       |
| 2.3.1.5     | 0          | 0        | 0        | 1        | 0        | 0        | 0        | 1     | 0      | 0      | 0      | 0      | 0       | 0      | 0      | 0       | 0     | 0       | 1       | 0       | 0       | 0       |
| 2.3.1.9     | 0          | 0        | 0        | 3        | 1        | 1        | 0        | 2     | 0      | 0      | 2      | 0      | 0       | 1      | 0      | 0       | 0     | 1       | 3       | 0       | 0       | 1       |
| 2.4.2.10    | 7          | 1        | 12       | 13       | 6        | 11       | 9        | 2     | 12     | 10     | 11     | 7      | 4       | 9      | 11     | 12      | 5     | 7       | 9       | 13      | 1       | 12      |
| 2.4.2.3     | 1          | 0        | 1        | 2        | 2        | 7        | 3        | 1     | 5      | 0      | 4      | 1      | 1       | 1      | 1      | 1       | 1     | 5       | 1       | 11      | 2       | 10      |
| 2.4.2.4     | 0          | 1        | 0        | 0        | 0        | 1        | 0        | 0     | 0      | 0      | 1      | 0      | 0       | 3      | 0      | 0       | 0     | 1       | 3       | 0       | 1       | 3       |
| 2.4.2.8     | 5          | 1        | 9        | 11       | 6        | 12       | 9        | 2     | 12     | 13     | 8      | 7      | 5       | 7      | 10     | 9       | 10    | 6       | 6       | 8       | 7       | 10      |
| 2.5.1.-     | 11         | 5        | 18       | 24       | 11       | 20       | 19       | 3     | 17     | 22     | 16     | 19     | 10      | 21     | 20     | 15      | 19    | 12      | 14      | 7       | 7       | 12      |

| EC/KO    | IN-199SUBD | IN-683PD | IN-683RD | IN-882AK | IN-882RK | IN-976AB | IN-976DB | IN-A1 | IN-AA6 | IN-DB2 | IN-IS8 | IN-LB1 | IN-SAK7 | IN-SH3 | IN-SK5 | IN-SOH4 | IN-U2 | IT-AD-1 | IT-AD-2 | IT-AD-3 | IT-AD-4 | IT-AD-5 |
|----------|------------|----------|----------|----------|----------|----------|----------|-------|--------|--------|--------|--------|---------|--------|--------|---------|-------|---------|---------|---------|---------|---------|
| 2.5.1.18 | 0          | 0        | 0        | 3        | 0        | 1        | 0        | 4     | 1      | 2      | 0      | 0      | 0       | 4      | 0      | 0       | 0     | 2       | 9       | 4       | 2       | 1       |
| 2.6.1.-  | 8          | 7        | 17       | 29       | 10       | 24       | 17       | 2     | 15     | 18     | 26     | 24     | 11      | 17     | 27     | 16      | 21    | 10      | 5       | 8       | 7       | 9       |
| 2.7.1.21 | 5          | 3        | 7        | 7        | 5        | 7        | 6        | 0     | 6      | 7      | 6      | 8      | 2       | 7      | 11     | 8       | 4     | 3       | 4       | 3       | 2       | 2       |
| 2.7.1.48 | 11         | 5        | 12       | 13       | 4        | 7        | 6        | 0     | 18     | 14     | 11     | 10     | 3       | 8      | 6      | 9       | 9     | 10      | 20      | 19      | 10      | 13      |
| 2.7.4.-  | 9          | 2        | 9        | 12       | 8        | 14       | 10       | 0     | 13     | 13     | 12     | 10     | 8       | 10     | 13     | 12      | 13    | 8       | 9       | 6       | 3       | 4       |
| 2.8.3.-  | 1          | 0        | 1        | 3        | 1        | 0        | 1        | 1     | 1      | 0      | 0      | 0      | 0       | 1      | 0      | 0       | 0     | 0       | 1       | 0       | 0       | 0       |
| 2.8.3.1  | 0          | 0        | 0        | 0        | 0        | 0        | 1        | 0     | 0      | 0      | 0      | 0      | 0       | 0      | 0      | 1       | 0     | 0       | 1       | 0       | 0       | 2       |
| 2.8.3.12 | 2          | 0        | 0        | 1        | 0        | 0        | 0        | 0     | 1      | 0      | 1      | 0      | 0       | 0      | 0      | 0       | 0     | 1       | 1       | 1       | 0       | 0       |
| 2.8.3.6  | 1          | 0        | 0        | 0        | 0        | 0        | 0        | 0     | 0      | 0      | 0      | 0      | 0       | 0      | 1      | 0       | 0     | 1       | 1       | 0       | 0       | 0       |
| 2.8.3.8  | 1          | 0        | 0        | 1        | 1        | 1        | 1        | 2     | 0      | 0      | 0      | 0      | 0       | 0      | 0      | 1       | 0     | 1       | 1       | 1       | 0       | 7       |
| 3.1.1.-  | 1          | 0        | 3        | 4        | 4        | 1        | 1        | 5     | 6      | 4      | 5      | 0      | 2       | 4      | 4      | 0       | 1     | 2       | 9       | 6       | 2       | 7       |
| 3.1.1.1  | 1          | 1        | 3        | 2        | 0        | 3        | 6        | 0     | 1      | 6      | 3      | 5      | 1       | 4      | 4      | 2       | 3     | 4       | 5       | 3       | 0       | 1       |
| 3.1.1.17 | 0          | 0        | 0        | 0        | 0        | 0        | 0        | 0     | 0      | 0      | 0      | 0      | 0       | 0      | 0      | 0       | 0     | 0       | 1       | 0       | 0       | 1       |
| 3.1.1.2  | 0          | 0        | 0        | 0        | 1        | 0        | 0        | 0     | 1      | 1      | 0      | 0      | 0       | 1      | 1      | 0       | 0     | 0       | 2       | 0       | 0       | 1       |
| 3.1.1.24 | 1          | 0        | 0        | 2        | 0        | 0        | 0        | 1     | 0      | 0      | 0      | 0      | 0       | 0      | 0      | 0       | 0     | 0       | 3       | 1       | 0       | 0       |
| 3.1.1.45 | 0          | 0        | 0        | 0        | 0        | 0        | 0        | 1     | 0      | 0      | 0      | 0      | 0       | 1      | 0      | 0       | 0     | 1       | 2       | 0       | 0       | 0       |
| 3.1.2.-  | 0          | 0        | 0        | 0        | 2        | 2        | 0        | 1     | 2      | 1      | 0      | 0      | 0       | 1      | 1      | 0       | 0     | 1       | 4       | 2       | 0       | 1       |
| 3.1.2.23 | 0          | 1        | 1        | 1        | 0        | 1        | 0        | 0     | 2      | 2      | 1      | 1      | 2       | 0      | 1      | 1       | 2     | 4       | 1       | 2       | 0       | 0       |
| 3.1.3.1  | 3          | 6        | 11       | 16       | 4        | 7        | 6        | 2     | 9      | 12     | 15     | 11     | 7       | 8      | 12     | 14      | 12    | 6       | 3       | 4       | 5       | 1       |
| 3.1.3.2  | 3          | 2        | 7        | 8        | 3        | 3        | 6        | 1     | 1      | 9      | 7      | 7      | 7       | 8      | 8      | 6       | 9     | 1       | 2       | 3       | 3       | 1       |
| 3.1.3.41 | 0          | 0        | 0        | 0        | 0        | 1        | 0        | 1     | 0      | 0      | 0      | 0      | 0       | 0      | 0      | 0       | 0     | 1       | 1       | 1       | 0       | 0       |
| 3.2.1.31 | 0          | 0        | 0        | 1        | 0        | 0        | 0        | 2     | 3      | 0      | 0      | 0      | 0       | 2      | 0      | 0       | 0     | 2       | 0       | 3       | 2       | 0       |
| 3.3.2.9  | 0          | 0        | 0        | 0        | 0        | 0        | 0        | 0     | 0      | 0      | 0      | 0      | 0       | 0      | 0      | 0       | 0     | 0       | 1       | 1       | 0       | 0       |
| 3.5.1.-  | 11         | 2        | 14       | 18       | 9        | 11       | 11       | 1     | 13     | 15     | 16     | 11     | 7       | 12     | 14     | 13      | 11    | 10      | 7       | 12      | 5       | 7       |
| 3.5.1.4  | 4          | 0        | 4        | 5        | 3        | 4        | 3        | 1     | 2      | 4      | 2      | 3      | 2       | 5      | 3      | 2       | 3     | 3       | 2       | 0       | 3       | 3       |
| 3.5.1.5  | 0          | 0        | 1        | 2        | 4        | 2        | 1        | 3     | 1      | 0      | 1      | 0      | 0       | 0      | 2      | 0       | 0     | 0       | 4       | 0       | 1       | 0       |
| 3.5.1.54 | 4          | 0        | 1        | 0        | 2        | 0        | 1        | 2     | 1      | 1      | 0      | 0      | 0       | 2      | 1      | 0       | 1     | 4       | 5       | 5       | 2       | 3       |
| 3.5.1.6  | 0          | 0        | 0        | 0        | 0        | 0        | 0        | 0     | 0      | 0      | 0      | 0      | 0       | 0      | 1      | 0       | 0     | 0       | 2       | 1       | 0       | 0       |
| 3.5.2.-  | 0          | 0        | 0        | 0        | 0        | 0        | 0        | 0     | 0      | 0      | 0      | 0      | 0       | 0      | 0      | 0       | 0     | 0       | 0       | 0       | 0       | 0       |
| 3.5.2.2  | 0          | 0        | 0        | 0        | 0        | 0        | 0        | 0     | 0      | 0      | 0      | 0      | 0       | 1      | 0      | 0       | 0     | 0       | 0       | 1       | 0       | 1       |
| 3.5.4.-  | 12         | 7        | 13       | 24       | 14       | 19       | 12       | 2     | 24     | 16     | 18     | 24     | 9       | 12     | 22     | 14      | 9     | 14      | 13      | 21      | 7       | 20      |
| 3.5.4.5  | 6          | 2        | 3        | 4        | 3        | 7        | 4        | 0     | 4      | 4      | 2      | 5      | 1       | 2      | 0      | 4       | 6     | 10      | 11      | 8       | 4       | 10      |
| 3.5.5.1  | 1          | 0        | 0        | 0        | 0        | 0        | 0        | 0     | 1      | 0      | 0      | 0      | 0       | 0      | 1      | 0       | 0     | 0       | 0       | 0       | 0       | 0       |
| 3.5.5.7  | 0          | 0        | 0        | 0        | 2        | 0        | 0        | 0     | 0      | 0      | 0      | 0      | 0       | 0      | 0      | 0       | 0     | 0       | 0       | 0       | 0       | 0       |
| 3.5.99.3 | 0          | 0        | 0        | 0        | 0        | 0        | 0        | 0     | 0      | 0      | 0      | 0      | 0       | 0      | 0      | 0       | 0     | 1       | 0       | 0       | 0       | 0       |
| 3.6.1.7  | 1          | 1        | 2        | 3        | 2        | 1        | 0        | 0     | 2      | 1      | 1      | 1      | 0       | 0      | 1      | 0       | 1     | 4       | 3       | 5       | 4       | 2       |
| 3.7.1.-  | 2          | 2        | 0        | 0        | 1        | 2        | 0        | 0     | 0      | 0      | 0      | 0      | 0       | 0      | 0      | 0       | 0     | 1       | 3       | 1       | 2       | 1       |
| 3.7.1.2  | 0          | 0        | 0        | 0        | 0        | 0        | 0        | 0     | 0      | 0      | 0      | 0      | 0       | 1      | 1      | 0       | 0     | 1       | 3       | 2       | 0       | 2       |
| 3.8.1.2  | 1          | 0        | 1        | 3        | 1        | 6        | 0        | 1     | 0      | 0      | 1      | 1      | 1       | 2      | 1      | 1       | 0     | 5       | 1       | 5       | 0       | 2       |
| 3.8.1.3  | 0          | 0        | 0        | 0        | 0        | 0        | 0        | 0     | 0      | 0      | 0      | 0      | 0       | 0      | 0      | 0       | 0     | 0       | 0       | 0       | 0       | 0       |
| 3.8.1.5  | 0          | 0        | 0        | 0        | 0        | 0        | 0        | 1     | 0      | 0      | 0      | 0      | 0       | 0      | 0      | 0       | 0     | 0       | 1       | 0       | 0       | 1       |
| 4.1.1.-  | 2          | 1        | 7        | 11       | 14       | 4        | 7        | 1     | 8      | 9      | 5      | 6      | 4       | 6      | 9      | 6       | 9     | 5       | 9       | 8       | 2       | 4       |
| 4.1.1.44 | 16         | 3        | 11       | 12       | 10       | 14       | 10       | 0     | 12     | 12     | 11     | 10     | 4       | 9      | 11     | 5       | 8     | 16      | 25      | 18      | 19      | 16      |
| 4.1.1.55 | 0          | 0        | 0        | 0        | 0        | 0        | 0        | 0     | 0      | 0      | 0      | 0      | 0       | 0      | 0      | 0       | 0     | 0       | 0       | 0       | 0       | 0       |
| 4.1.1.7  | 0          | 0        | 0        | 0        | 0        | 0        | 0        | 0     | 0      | 0      | 0      | 0      | 0       | 0      | 0      | 0       | 0     | 0       | 0       | 0       | 0       | 0       |
| 4.1.1.70 | 0          | 0        | 0        | 0        | 0        | 0        | 0        | 0     | 0      | 0      | 0      | 0      | 0       | 0      | 0      | 0       | 0     | 0       | 0       | 0       | 0       | 0       |
| 4.1.1.77 | 0          | 0        | 0        | 0        | 0        | 0        | 0        | 0     | 0      | 0      | 0      | 0      | 0       | 0      | 0      | 0       | 0     | 0       | 0       | 0       | 0       | 0       |
| 4.1.2.-  | 2          | 0        | 2        | 0        | 3        | 0        | 2        | 3     | 5      | 0      | 1      | 0      | 1       | 4      | 2      | 4       | 2     | 3       | 2       | 7       | 2       | 5       |
| 4.1.3.-  | 8          | 4        | 11       | 14       | 6        | 13       | 8        | 0     | 11     | 10     | 8      | 7      | 4       | 7      | 10     | 8       | 12    | 11      | 10      | 11      | 10      | 8       |

| EC/KO    | IN-199SUBD | IN-683PD | IN-683RD | IN-882AK | IN-882RK | IN-976AB | IN-976DB | IN-A1 | IN-AA6 | IN-DB2 | IN-IS8 | IN-LB1 | IN-SAK7 | IN-SH3 | IN-SK5 | IN-SOH4 | IN-U2 | IT-AD-1 | IT-AD-2 | IT-AD-3 | IT-AD-4 | IT-AD-5 |
|----------|------------|----------|----------|----------|----------|----------|----------|-------|--------|--------|--------|--------|---------|--------|--------|---------|-------|---------|---------|---------|---------|---------|
| 4.1.3.39 | 0          | 0        | 0        | 0        | 0        | 0        | 1        | 0     | 0      | 0      | 0      | 0      | 0       | 2      | 1      | 1       | 0     | 0       | 1       | 0       | 0       | 0       |
| 4.1.99.- | 0          | 0        | 0        | 0        | 2        | 0        | 0        | 0     | 0      | 0      | 0      | 0      | 0       | 0      | 0      | 0       | 1     | 0       | 0       | 1       | 1       | 0       |
| 4.2.1.-  | 7          | 5        | 18       | 23       | 11       | 18       | 14       | 3     | 22     | 18     | 12     | 19     | 15      | 14     | 19     | 16      | 25    | 20      | 23      | 19      | 8       | 15      |
| 4.2.1.17 | 2          | 2        | 3        | 2        | 3        | 1        | 1        | 2     | 4      | 0      | 2      | 0      | 1       | 2      | 1      | 1       | 2     | 5       | 8       | 4       | 3       | 1       |
| 4.2.1.80 | 0          | 0        | 0        | 0        | 0        | 0        | 0        | 0     | 0      | 0      | 0      | 0      | 0       | 0      | 0      | 0       | 0     | 3       | 2       | 0       | 0       | 0       |
| 4.2.1.83 | 0          | 0        | 0        | 0        | 0        | 0        | 0        | 0     | 0      | 0      | 0      | 0      | 0       | 0      | 0      | 0       | 0     | 2       | 0       | 0       | 0       | 1       |
| 4.2.1.84 | 0          | 0        | 0        | 0        | 0        | 0        | 0        | 0     | 0      | 0      | 0      | 0      | 0       | 0      | 0      | 0       | 0     | 0       | 0       | 0       | 0       | 0       |
| 5.1.2.2  | 0          | 0        | 0        | 0        | 0        | 0        | 0        | 0     | 0      | 0      | 0      | 0      | 0       | 0      | 0      | 0       | 0     | 0       | 0       | 0       | 0       | 0       |
| 5.2.1.2  | 0          | 0        | 0        | 0        | 0        | 0        | 0        | 0     | 0      | 0      | 0      | 0      | 0       | 0      | 0      | 0       | 0     | 0       | 0       | 0       | 0       | 0       |
| 5.3.3.4  | 0          | 0        | 0        | 0        | 0        | 0        | 0        | 0     | 0      | 0      | 0      | 0      | 0       | 0      | 0      | 0       | 0     | 0       | 0       | 0       | 0       | 0       |
| 5.3.99.- | 1          | 2        | 0        | 2        | 0        | 0        | 1        | 0     | 1      | 0      | 0      | 0      | 1       | 1      | 0      | 2       | 0     | 1       | 6       | 2       | 3       | 1       |
| 5.4.99.- | 0          | 0        | 1        | 1        | 0        | 0        | 1        | 0     | 1      | 0      | 0      | 0      | 1       | 0      | 0      | 0       | 0     | 0       | 0       | 1       | 0       | 1       |
| 5.5.1.1  | 2          | 0        | 1        | 0        | 1        | 0        | 0        | 0     | 2      | 0      | 0      | 0      | 0       | 1      | 0      | 1       | 0     | 1       | 2       | 0       | 1       | 2       |
| 5.5.1.2  | 0          | 0        | 0        | 0        | 0        | 0        | 0        | 0     | 0      | 0      | 0      | 0      | 0       | 0      | 0      | 0       | 0     | 0       | 1       | 0       | 0       | 0       |
| 6.2.1.-  | 0          | 0        | 0        | 0        | 0        | 0        | 0        | 0     | 0      | 0      | 0      | 0      | 0       | 0      | 0      | 0       | 0     | 0       | 1       | 0       | 0       | 0       |
| 6.3.5.2  | 3          | 2        | 7        | 14       | 7        | 12       | 7        | 3     | 5      | 9      | 6      | 4      | 6       | 9      | 8      | 8       | 12    | 11      | 11      | 10      | 7       | 13      |
| K00002   | 0          | 0        | 0        | 0        | 0        | 1        | 0        | 0     | 0      | 0      | 1      | 0      | 0       | 0      | 0      | 0       | 0     | 0       | 1       | 2       | 0       | 2       |
| K00055   | 0          | 0        | 0        | 0        | 2        | 1        | 0        | 0     | 0      | 0      | 0      | 0      | 0       | 0      | 0      | 0       | 0     | 0       | 1       | 1       | 0       | 0       |
| K00074   | 1          | 0        | 0        | 1        | 2        | 3        | 1        | 0     | 0      | 0      | 0      | 0      | 0       | 1      | 0      | 1       | 1     | 5       | 6       | 5       | 8       | 6       |
| K00088   | 7          | 4        | 11       | 16       | 9        | 14       | 11       | 2     | 13     | 16     | 11     | 9      | 7       | 7      | 12     | 8       | 12    | 7       | 9       | 7       | 8       | 3       |
| K00100   | 17         | 11       | 26       | 31       | 22       | 30       | 27       | 6     | 22     | 24     | 26     | 22     | 7       | 22     | 29     | 22      | 20    | 32      | 27      | 28      | 23      | 19      |
| K00128   | 1          | 0        | 1        | 1        | 4        | 4        | 0        | 0     | 0      | 0      | 2      | 0      | 0       | 1      | 0      | 0       | 0     | 1       | 3       | 2       | 0       | 0       |
| K00129   | 0          | 0        | 0        | 0        | 0        | 0        | 0        | 0     | 0      | 0      | 0      | 0      | 0       | 0      | 0      | 0       | 0     | 0       | 0       | 0       | 0       | 0       |
| K00132   | 0          | 0        | 0        | 0        | 0        | 0        | 0        | 0     | 0      | 0      | 0      | 0      | 0       | 0      | 0      | 0       | 0     | 0       | 0       | 0       | 0       | 0       |
| K00141   | 0          | 0        | 0        | 0        | 0        | 0        | 0        | 0     | 0      | 0      | 0      | 0      | 0       | 0      | 0      | 0       | 0     | 0       | 0       | 0       | 0       | 0       |
| K00146   | 0          | 0        | 0        | 0        | 0        | 0        | 0        | 0     | 0      | 0      | 0      | 0      | 0       | 1      | 0      | 0       | 0     | 0       | 2       | 0       | 0       | 0       |
| K00148   | 0          | 0        | 0        | 0        | 0        | 0        | 0        | 0     | 0      | 0      | 0      | 0      | 0       | 0      | 0      | 0       | 0     | 0       | 0       | 0       | 0       | 0       |
| K00155   | 0          | 0        | 0        | 1        | 1        | 0        | 0        | 0     | 0      | 0      | 0      | 0      | 0       | 0      | 0      | 0       | 0     | 0       | 1       | 0       | 0       | 0       |
| K00169   | 0          | 0        | 2        | 2        | 0        | 2        | 2        | 0     | 2      | 0      | 2      | 0      | 0       | 0      | 2      | 0       | 0     | 0       | 2       | 1       | 0       | 0       |
| K00224   | 0          | 0        | 0        | 0        | 0        | 1        | 0        | 0     | 0      | 0      | 0      | 0      | 0       | 0      | 0      | 0       | 1     | 1       | 0       | 0       | 0       | 0       |
| K00274   | 0          | 0        | 0        | 0        | 0        | 0        | 0        | 0     | 0      | 0      | 0      | 0      | 0       | 0      | 0      | 0       | 0     | 0       | 0       | 0       | 0       | 0       |
| K00446   | 0          | 0        | 0        | 0        | 0        | 0        | 0        | 0     | 0      | 0      | 0      | 0      | 0       | 0      | 0      | 0       | 0     | 0       | 1       | 1       | 0       | 0       |
| K00448   | 0          | 0        | 0        | 0        | 0        | 0        | 0        | 0     | 0      | 0      | 0      | 0      | 0       | 0      | 0      | 0       | 0     | 0       | 0       | 0       | 0       | 0       |
| K00462   | 0          | 0        | 0        | 0        | 0        | 0        | 1        | 0     | 0      | 0      | 0      | 0      | 0       | 1      | 0      | 0       | 0     | 0       | 1       | 2       | 0       | 1       |
| K00480   | 0          | 0        | 0        | 0        | 0        | 0        | 0        | 0     | 0      | 0      | 0      | 0      | 0       | 0      | 0      | 0       | 0     | 0       | 0       | 0       | 0       | 0       |
| K00481   | 0          | 0        | 0        | 0        | 0        | 0        | 0        | 0     | 0      | 0      | 0      | 0      | 0       | 0      | 0      | 0       | 0     | 0       | 1       | 0       | 0       | 0       |
| K00539   | 0          | 0        | 0        | 0        | 0        | 0        | 0        | 0     | 0      | 0      | 0      | 0      | 0       | 0      | 0      | 0       | 0     | 0       | 0       | 0       | 0       | 1       |
| K00599   | 9          | 9        | 20       | 34       | 21       | 32       | 17       | 1     | 16     | 19     | 20     | 24     | 10      | 16     | 25     | 16      | 23    | 11      | 13      | 21      | 14      | 17      |
| K00626   | 0          | 0        | 1        | 3        | 1        | 2        | 0        | 2     | 0      | 0      | 5      | 0      | 0       | 3      | 1      | 0       | 0     | 2       | 4       | 0       | 1       | 1       |
| K00632   | 0          | 0        | 0        | 0        | 1        | 0        | 0        | 0     | 0      | 0      | 0      | 0      | 0       | 0      | 0      | 0       | 0     | 0       | 1       | 0       | 0       | 0       |
| K00680   | 12         | 8        | 15       | 23       | 17       | 24       | 14       | 0     | 13     | 17     | 16     | 15     | 7       | 10     | 14     | 9       | 7     | 21      | 20      | 21      | 7       | 28      |
| K00757   | 8          | 2        | 6        | 10       | 4        | 5        | 11       | 1     | 10     | 8      | 8      | 8      | 5       | 6      | 11     | 7       | 9     | 8       | 4       | 10      | 3       | 9       |
| K00758   | 0          | 1        | 0        | 1        | 0        | 0        | 0        | 1     | 3      | 0      | 2      | 0      | 0       | 1      | 0      | 1       | 0     | 3       | 2       | 4       | 1       | 4       |
| K00760   | 4          | 1        | 2        | 4        | 11       | 11       | 3        | 2     | 7      | 2      | 5      | 2      | 1       | 3      | 3      | 5       | 3     | 11      | 11      | 17      | 7       | 17      |
| K00799   | 0          | 0        | 0        | 1        | 0        | 1        | 0        | 1     | 0      | 0      | 1      | 0      | 0       | 1      | 1      | 0       | 0     | 0       | 5       | 2       | 0       | 0       |
| K00857   | 5          | 3        | 9        | 9        | 7        | 11       | 9        | 0     | 7      | 6      | 8      | 11     | 2       | 8      | 13     | 11      | 3     | 5       | 7       | 6       | 3       | 5       |
| K00876   | 14         | 6        | 18       | 23       | 12       | 17       | 10       | 0     | 16     | 21     | 20     | 18     | 9       | 16     | 21     | 18      | 12    | 7       | 20      | 12      | 6       | 8       |
| K01026   | 1          | 0        | 0        | 0        | 0        | 0        | 1        | 0     | 0      | 0      | 0      | 0      | 0       | 1      | 0      | 1       | 0     | 1       | 2       | 0       | 1       | 2       |
| K01031   | 0          | 0        | 0        | 0        | 0        | 0        | 0        | 0     | 0      | 0      | 0      | 0      | 0       | 0      | 0      | 0       | 0     | 0       | 0       | 0       | 0       | 0       |

| EC/KO  | IN-199SUBD | IN-683PD | IN-683RD | IN-882AK | IN-882RK | IN-976AB | IN-976DB | IN-A1 | IN-AA6 | IN-DB2 | IN-IS8 | IN-LB1 | IN-SAK7 | IN-SH3 | IN-SK5 | IN-SOH4 | IN-U2 | IT-AD-1 | IT-AD-2 | IT-AD-3 | IT-AD-4 | IT-AD-5 |
|--------|------------|----------|----------|----------|----------|----------|----------|-------|--------|--------|--------|--------|---------|--------|--------|---------|-------|---------|---------|---------|---------|---------|
| K01034 | 1          | 0        | 0        | 0        | 0        | 0        | 0        | 1     | 0      | 0      | 0      | 0      | 0       | 0      | 0      | 1       | 0     | 1       | 0       | 0       | 0       | 2       |
| K01039 | 0          | 0        | 0        | 0        | 0        | 0        | 0        | 0     | 0      | 0      | 0      | 0      | 0       | 0      | 0      | 0       | 0     | 1       | 0       | 1       | 0       | 0       |
| K01041 | 3          | 2        | 6        | 10       | 3        | 5        | 6        | 1     | 7      | 7      | 7      | 5      | 4       | 6      | 6      | 4       | 4     | 2       | 1       | 2       | 2       | 0       |
| K01053 | 0          | 0        | 0        | 0        | 0        | 0        | 0        | 0     | 0      | 0      | 0      | 0      | 0       | 0      | 0      | 0       | 0     | 0       | 0       | 0       | 0       | 0       |
| K01055 | 0          | 0        | 0        | 0        | 0        | 0        | 0        | 0     | 0      | 0      | 0      | 0      | 0       | 0      | 0      | 0       | 0     | 0       | 0       | 0       | 0       | 0       |
| K01061 | 0          | 0        | 0        | 0        | 0        | 0        | 0        | 1     | 1      | 0      | 0      | 0      | 0       | 2      | 0      | 0       | 0     | 1       | 5       | 0       | 0       | 0       |
| K01066 | 2          | 0        | 2        | 0        | 2        | 1        | 2        | 2     | 2      | 5      | 2      | 1      | 0       | 3      | 2      | 1       | 1     | 3       | 7       | 3       | 0       | 1       |
| K01075 | 0          | 0        | 0        | 1        | 0        | 0        | 2        | 0     | 1      | 0      | 0      | 0      | 0       | 1      | 0      | 0       | 0     | 0       | 1       | 1       | 0       | 1       |
| K01077 | 0          | 2        | 1        | 1        | 2        | 3        | 0        | 2     | 1      | 1      | 2      | 0      | 0       | 1      | 1      | 1       | 2     | 1       | 3       | 1       | 0       | 1       |
| K01101 | 1          | 0        | 0        | 1        | 3        | 3        | 1        | 0     | 1      | 0      | 0      | 0      | 0       | 0      | 0      | 1       | 1     | 1       | 6       | 3       | 0       | 4       |
| K01195 | 0          | 0        | 0        | 2        | 0        | 1        | 0        | 1     | 3      | 2      | 1      | 0      | 0       | 1      | 1      | 0       | 0     | 2       | 1       | 2       | 1       | 1       |
| K01426 | 0          | 0        | 0        | 0        | 1        | 2        | 0        | 0     | 0      | 0      | 0      | 0      | 0       | 0      | 0      | 0       | 0     | 2       | 2       | 0       | 0       | 2       |
| K01428 | 0          | 0        | 1        | 0        | 3        | 1        | 1        | 1     | 1      | 0      | 0      | 0      | 0       | 0      | 1      | 0       | 0     | 0       | 1       | 0       | 0       | 0       |
| K01457 | 0          | 0        | 0        | 0        | 0        | 0        | 0        | 0     | 0      | 0      | 0      | 0      | 0       | 0      | 0      | 0       | 0     | 0       | 0       | 0       | 0       | 0       |
| K01464 | 1          | 0        | 0        | 0        | 0        | 1        | 0        | 1     | 0      | 0      | 1      | 0      | 0       | 1      | 0      | 1       | 0     | 0       | 1       | 2       | 0       | 2       |
| K01489 | 8          | 3        | 8        | 10       | 3        | 8        | 6        | 2     | 8      | 7      | 7      | 4      | 5       | 6      | 7      | 7       | 9     | 11      | 13      | 10      | 7       | 18      |
| K01500 | 0          | 0        | 1        | 0        | 0        | 0        | 0        | 0     | 1      | 0      | 1      | 0      | 1       | 0      | 0      | 0       | 0     | 0       | 2       | 1       | 0       | 0       |
| K01501 | 2          | 0        | 0        | 0        | 0        | 0        | 0        | 0     | 1      | 0      | 1      | 0      | 0       | 0      | 1      | 1       | 1     | 0       | 0       | 0       | 0       | 0       |
| K01502 | 0          | 0        | 0        | 0        | 2        | 0        | 0        | 0     | 0      | 0      | 0      | 0      | 0       | 0      | 0      | 0       | 0     | 0       | 0       | 0       | 0       | 0       |
| K01512 | 1          | 1        | 2        | 4        | 6        | 5        | 1        | 0     | 3      | 1      | 2      | 1      | 2       | 0      | 2      | 0       | 2     | 5       | 4       | 8       | 5       | 5       |
| K01560 | 1          | 1        | 3        | 3        | 1        | 0        | 1        | 2     | 1      | 1      | 3      | 0      | 0       | 0      | 1      | 0       | 2     | 6       | 6       | 2       | 4       | 4       |
| K01561 | 0          | 0        | 0        | 0        | 0        | 0        | 0        | 0     | 0      | 0      | 0      | 0      | 0       | 0      | 0      | 0       | 0     | 0       | 1       | 0       | 0       | 0       |
| K01563 | 0          | 0        | 0        | 0        | 0        | 0        | 0        | 0     | 0      | 0      | 0      | 0      | 0       | 0      | 0      | 0       | 0     | 0       | 0       | 0       | 0       | 0       |
| K01564 | 0          | 0        | 0        | 0        | 0        | 0        | 0        | 1     | 0      | 0      | 0      | 0      | 0       | 1      | 0      | 0       | 0     | 1       | 0       | 1       | 0       | 0       |
| K01607 | 7          | 2        | 11       | 7        | 2        | 8        | 5        | 2     | 6      | 11     | 5      | 7      | 3       | 7      | 7      | 4       | 8     | 8       | 7       | 6       | 8       | 3       |
| K01612 | 0          | 0        | 0        | 0        | 0        | 0        | 0        | 0     | 0      | 0      | 0      | 0      | 0       | 0      | 0      | 0       | 0     | 0       | 0       | 0       | 0       | 0       |
| K01615 | 5          | 2        | 9        | 7        | 0        | 7        | 5        | 1     | 7      | 6      | 6      | 5      | 6       | 5      | 9      | 4       | 7     | 5       | 5       | 7       | 4       | 7       |
| K01617 | 0          | 0        | 0        | 0        | 0        | 0        | 0        | 0     | 0      | 0      | 0      | 0      | 0       | 0      | 0      | 0       | 0     | 0       | 0       | 0       | 0       | 0       |
| K01666 | 0          | 1        | 0        | 0        | 0        | 0        | 1        | 0     | 0      | 0      | 1      | 0      | 0       | 2      | 1      | 1       | 0     | 1       | 2       | 2       | 0       | 0       |
| K01692 | 0          | 0        | 0        | 0        | 0        | 0        | 0        | 0     | 0      | 0      | 0      | 0      | 0       | 0      | 0      | 0       | 0     | 0       | 2       | 0       | 0       | 0       |
| K01721 | 0          | 0        | 0        | 0        | 0        | 0        | 0        | 0     | 0      | 0      | 0      | 0      | 0       | 0      | 0      | 0       | 0     | 0       | 0       | 0       | 0       | 0       |
| K01726 | 3          | 3        | 7        | 11       | 2        | 6        | 6        | 1     | 5      | 5      | 7      | 8      | 4       | 3      | 8      | 4       | 8     | 3       | 2       | 0       | 0       | 1       |
| K01781 | 0          | 0        | 0        | 0        | 0        | 0        | 0        | 0     | 0      | 0      | 0      | 0      | 0       | 0      | 0      | 0       | 0     | 0       | 0       | 0       | 0       | 0       |
| K01821 | 1          | 0        | 0        | 0        | 5        | 4        | 0        | 0     | 1      | 1      | 0      | 0      | 0       | 0      | 0      | 0       | 0     | 2       | 2       | 3       | 1       | 1       |
| K01856 | 0          | 0        | 0        | 0        | 0        | 0        | 0        | 0     | 0      | 0      | 0      | 0      | 0       | 0      | 0      | 0       | 0     | 0       | 0       | 0       | 0       | 0       |
| K01857 | 0          | 0        | 0        | 0        | 0        | 0        | 0        | 0     | 0      | 0      | 0      | 0      | 0       | 0      | 0      | 1       | 0     | 0       | 1       | 0       | 0       | 0       |
| K01913 | 0          | 0        | 1        | 0        | 0        | 0        | 0        | 0     | 1      | 0      | 0      | 0      | 0       | 0      | 0      | 0       | 0     | 0       | 0       | 0       | 0       | 0       |
| K01951 | 6          | 2        | 8        | 17       | 5        | 15       | 8        | 3     | 4      | 10     | 8      | 6      | 6       | 9      | 7      | 8       | 10    | 6       | 9       | 5       | 3       | 8       |
| K02554 | 0          | 0        | 0        | 0        | 0        | 0        | 0        | 0     | 0      | 0      | 0      | 0      | 0       | 0      | 0      | 0       | 0     | 2       | 2       | 0       | 0       | 0       |
| K03381 | 0          | 0        | 0        | 0        | 0        | 0        | 0        | 0     | 0      | 0      | 0      | 0      | 0       | 0      | 0      | 0       | 0     | 0       | 0       | 0       | 0       | 0       |
| K03382 | 0          | 0        | 0        | 0        | 0        | 1        | 0        | 0     | 0      | 0      | 0      | 0      | 0       | 0      | 0      | 0       | 0     | 2       | 1       | 0       | 0       | 0       |
| K03464 | 0          | 0        | 0        | 0        | 0        | 0        | 0        | 0     | 0      | 0      | 0      | 0      | 0       | 0      | 0      | 0       | 0     | 0       | 0       | 0       | 0       | 0       |
| K03518 | 4          | 1        | 0        | 0        | 3        | 3        | 0        | 3     | 4      | 1      | 1      | 0      | 1       | 0      | 2      | 0       | 1     | 7       | 18      | 5       | 5       | 12      |
| K03862 | 0          | 0        | 0        | 0        | 0        | 0        | 0        | 0     | 0      | 0      | 0      | 0      | 0       | 0      | 0      | 0       | 0     | 0       | 0       | 0       | 0       | 0       |
| K04099 | 0          | 0        | 0        | 0        | 0        | 0        | 0        | 0     | 0      | 0      | 0      | 0      | 0       | 0      | 0      | 0       | 0     | 0       | 1       | 0       | 0       | 0       |
| K04100 | 0          | 0        | 0        | 0        | 0        | 0        | 0        | 0     | 0      | 0      | 0      | 0      | 0       | 0      | 0      | 0       | 0     | 0       | 0       | 0       | 0       | 0       |
| K04102 | 0          | 0        | 0        | 0        | 0        | 0        | 0        | 0     | 0      | 0      | 0      | 0      | 0       | 0      | 0      | 0       | 0     | 0       | 0       | 0       | 0       | 0       |
| K04116 | 0          | 0        | 0        | 0        | 0        | 0        | 0        | 0     | 0      | 0      | 0      | 0      | 0       | 0      | 0      | 0       | 0     | 1       | 0       | 0       | 0       | 0       |
| K05394 | 0          | 0        | 1        | 1        | 0        | 0        | 0        | 0     | 1      | 0      | 1      | 0      | 1       | 0      | 0      | 1       | 1     | 0       | 1       | 1       | 0       | 0       |

| EC/KO  | IN-199SUBD | IN-683PD | IN-683RD | IN-882AK | IN-882RK | IN-976AB | IN-976DB | IN-A1 | IN-AA6 | IN-DB2 | IN-IS8 | IN-LB1 | IN-SAK7 | IN-SH3 | IN-SK5 | IN-SOH4 | IN-U2 | IT-AD-1 | IT-AD-2 | IT-AD-3 | IT-AD-4 | IT-AD-5 |
|--------|------------|----------|----------|----------|----------|----------|----------|-------|--------|--------|--------|--------|---------|--------|--------|---------|-------|---------|---------|---------|---------|---------|
| K05549 | 0          | 0        | 0        | 0        | 0        | 0        | 0        | 0     | 0      | 0      | 0      | 0      | 0       | 0      | 0      | 0       | 0     | 0       | 1       | 0       | 0       | 0       |
| K05783 | 0          | 0        | 0        | 0        | 0        | 0        | 0        | 0     | 0      | 0      | 0      | 0      | 0       | 0      | 0      | 0       | 0     | 0       | 1       | 1       | 0       | 0       |
| K05797 | 0          | 0        | 0        | 0        | 0        | 0        | 0        | 0     | 0      | 0      | 0      | 0      | 0       | 0      | 0      | 0       | 0     | 0       | 0       | 0       | 0       | 0       |
| K06281 | 0          | 0        | 0        | 2        | 1        | 0        | 0        | 2     | 0      | 0      | 0      | 0      | 0       | 2      | 0      | 0       | 0     | 1       | 1       | 1       | 0       | 1       |
| K06446 | 1          | 0        | 0        | 1        | 2        | 1        | 1        | 0     | 2      | 0      | 4      | 1      | 1       | 1      | 1      | 2       | 0     | 2       | 4       | 5       | 2       | 2       |
| K06912 | 0          | 0        | 0        | 0        | 0        | 0        | 0        | 0     | 0      | 0      | 0      | 0      | 0       | 0      | 0      | 0       | 0     | 0       | 0       | 0       | 0       | 0       |
| K07535 | 0          | 0        | 0        | 0        | 0        | 0        | 0        | 0     | 0      | 0      | 0      | 0      | 0       | 0      | 0      | 0       | 0     | 0       | 0       | 0       | 0       | 0       |
| K07536 | 1          | 0        | 3        | 5        | 2        | 1        | 6        | 3     | 4      | 4      | 3      | 9      | 2       | 6      | 7      | 3       | 4     | 2       | 2       | 2       | 1       | 2       |
| K08689 | 0          | 0        | 0        | 0        | 0        | 0        | 0        | 0     | 0      | 0      | 0      | 0      | 0       | 0      | 0      | 0       | 0     | 0       | 0       | 0       | 0       | 0       |
| K08710 | 0          | 0        | 0        | 0        | 0        | 0        | 0        | 0     | 0      | 0      | 0      | 0      | 0       | 1      | 0      | 0       | 0     | 0       | 0       | 0       | 0       | 0       |
| K09461 | 0          | 0        | 0        | 0        | 0        | 1        | 0        | 1     | 0      | 0      | 0      | 0      | 0       | 0      | 0      | 0       | 0     | 1       | 2       | 1       | 2       | 1       |
| K10217 | 0          | 0        | 0        | 0        | 0        | 0        | 0        | 0     | 0      | 0      | 0      | 0      | 0       | 1      | 0      | 0       | 0     | 0       | 0       | 0       | 0       | 0       |
| K10218 | 1          | 0        | 0        | 0        | 0        | 0        | 0        | 0     | 0      | 0      | 0      | 0      | 0       | 0      | 0      | 0       | 0     | 0       | 0       | 1       | 0       | 0       |
| K10220 | 0          | 0        | 0        | 0        | 0        | 0        | 0        | 0     | 0      | 0      | 0      | 0      | 0       | 0      | 0      | 0       | 0     | 0       | 0       | 0       | 0       | 0       |
| K11180 | 0          | 0        | 0        | 0        | 0        | 0        | 0        | 0     | 0      | 0      | 0      | 0      | 0       | 0      | 0      | 0       | 0     | 3       | 0       | 0       | 0       | 0       |
| K13953 | 0          | 0        | 0        | 2        | 0        | 1        | 1        | 1     | 0      | 0      | 0      | 0      | 0       | 1      | 0      | 0       | 0     | 0       | 3       | 1       | 3       | 2       |
| K14333 | 0          | 0        | 0        | 0        | 0        | 0        | 0        | 0     | 0      | 0      | 0      | 0      | 0       | 0      | 0      | 0       | 0     | 0       | 1       | 0       | 0       | 0       |
| K14519 | 0          | 0        | 0        | 0        | 0        | 0        | 0        | 0     | 0      | 0      | 0      | 0      | 0       | 0      | 0      | 0       | 0     | 0       | 0       | 0       | 0       | 0       |
| K15054 | 0          | 0        | 0        | 0        | 1        | 0        | 0        | 0     | 0      | 0      | 0      | 0      | 0       | 0      | 0      | 0       | 0     | 0       | 1       | 0       | 0       | 0       |
| K16173 | 0          | 0        | 0        | 1        | 0        | 0        | 1        | 0     | 0      | 0      | 0      | 0      | 1       | 0      | 0      | 2       | 0     | 0       | 0       | 0       | 0       | 0       |
| K16514 | 0          | 0        | 0        | 0        | 0        | 0        | 0        | 0     | 1      | 0      | 0      | 0      | 0       | 1      | 0      | 0       | 0     | 0       | 0       | 0       | 0       | 0       |
| K16874 | 0          | 0        | 0        | 0        | 0        | 0        | 0        | 0     | 0      | 0      | 0      | 0      | 0       | 0      | 0      | 0       | 0     | 0       | 0       | 0       | 0       | 0       |

| EC/KO      | IT-AD-6 | JP-AD-1 | JP-AD-2 | JP-AD-3 | JP-AD-4 | JP-AD-7 | JP-AD-8 | JP-AD-9 | JP-CH-1 | JP-CH-2 | JP-IN-1 | JP-IN-2 | JP-IN-3 | JP-IN-4 |
|------------|---------|---------|---------|---------|---------|---------|---------|---------|---------|---------|---------|---------|---------|---------|
| 1.1.1.-    | 34      | 16      | 18      | 25      | 21      | 17      | 22      | 23      | 22      | 27      | 36      | 8       | 18      | 29      |
| 1.1.1.1    | 25      | 14      | 26      | 19      | 19      | 8       | 14      | 17      | 28      | 19      | 23      | 15      | 17      | 17      |
| 1.1.1.157  | 0       | 0       | 2       | 0       | 0       | 0       | 0       | 0       | 2       | 0       | 0       | 0       | 0       | 0       |
| 1.1.1.205  | 12      | 5       | 9       | 17      | 8       | 1       | 9       | 4       | 8       | 9       | 4       | 4       | 6       | 3       |
| 1.1.1.35   | 2       | 1       | 2       | 0       | 0       | 1       | 0       | 2       | 2       | 0       | 1       | 0       | 1       | 1       |
| 1.12.99.6  | 1       | 0       | 1       | 0       | 0       | 1       | 0       | 0       | 0       | 2       | 1       | 0       | 0       | 3       |
| 1.13.11.-  | 0       | 0       | 0       | 0       | 0       | 0       | 0       | 0       | 0       | 0       | 0       | 0       | 1       | 0       |
| 1.13.11.1  | 0       | 0       | 0       | 0       | 0       | 0       | 0       | 0       | 0       | 0       | 0       | 0       | 0       | 0       |
| 1.13.11.2  | 0       | 0       | 0       | 0       | 0       | 0       | 0       | 0       | 0       | 0       | 0       | 0       | 0       | 0       |
| 1.13.11.3  | 0       | 0       | 0       | 1       | 0       | 0       | 0       | 0       | 0       | 0       | 1       | 0       | 0       | 0       |
| 1.13.11.39 | 0       | 0       | 0       | 0       | 0       | 0       | 0       | 0       | 0       | 0       | 0       | 0       | 0       | 0       |
| 1.13.11.5  | 0       | 0       | 0       | 0       | 0       | 0       | 0       | 0       | 0       | 0       | 0       | 0       | 0       | 0       |
| 1.13.11.8  | 0       | 0       | 0       | 0       | 0       | 0       | 0       | 0       | 0       | 0       | 1       | 0       | 0       | 0       |
| 1.14.12.10 | 0       | 0       | 0       | 1       | 0       | 0       | 0       | 0       | 0       | 0       | 1       | 0       | 0       | 0       |
| 1.14.12.13 | 0       | 0       | 0       | 0       | 0       | 0       | 0       | 0       | 0       | 0       | 0       | 0       | 0       | 0       |
| 1.14.12.18 | 0       | 0       | 0       | 1       | 0       | 0       | 0       | 0       | 0       | 0       | 0       | 0       | 0       | 1       |
| 1.14.13.-  | 0       | 1       | 0       | 1       | 0       | 0       | 0       | 0       | 1       | 0       | 18      | 3       | 0       | 3       |
| 1.14.13.1  | 0       | 0       | 0       | 0       | 0       | 0       | 0       | 0       | 0       | 0       | 2       | 0       | 0       | 0       |
| 1.14.13.2  | 0       | 0       | 0       | 1       | 0       | 0       | 0       | 0       | 0       | 0       | 1       | 0       | 0       | 0       |
| 1.14.13.50 | 0       | 0       | 0       | 0       | 0       | 0       | 0       | 0       | 1       | 0       | 0       | 0       | 0       | 0       |
| 1.14.13.7  | 0       | 0       | 0       | 0       | 0       | 0       | 0       | 0       | 0       | 0       | 0       | 0       | 0       | 0       |
| 1.14.13.8  | 0       | 0       | 0       | 0       | 0       | 0       | 0       | 0       | 0       | 0       | 0       | 0       | 0       | 0       |
| 1.14.13.82 | 0       | 0       | 0       | 1       | 0       | 0       | 0       | 0       | 0       | 1       | 4       | 0       | 0       | 0       |
| 1.14.99.-  | 0       | 0       | 0       | 0       | 0       | 0       | 0       | 0       | 0       | 0       | 0       | 0       | 0       | 0       |
| 1.17.99.1  | 0       | 0       | 0       | 0       | 0       | 0       | 0       | 0       | 0       | 0       | 0       | 0       | 0       | 0       |
| 1.18.6.1   | 0       | 0       | 0       | 0       | 0       | 0       | 0       | 0       | 0       | 0       | 4       | 0       | 0       | 0       |
| 1.2.1.-    | 0       | 0       | 0       | 0       | 0       | 0       | 0       | 0       | 0       | 0       | 5       | 0       | 1       | 1       |
| 1.2.1.10   | 3       | 5       | 2       | 1       | 2       | 0       | 0       | 1       | 1       | 2       | 2       | 0       | 0       | 2       |
| 1.2.1.3    | 3       | 6       | 4       | 5       | 2       | 1       | 2       | 5       | 2       | 1       | 17      | 1       | 6       | 7       |
| 1.2.1.39   | 0       | 0       | 0       | 0       | 0       | 0       | 0       | 0       | 0       | 0       | 0       | 0       | 0       | 0       |
| 1.2.7.1    | 13      | 3       | 3       | 3       | 4       | 1       | 4       | 3       | 3       | 9       | 0       | 0       | 1       | 0       |
| 1.2.99.2   | 6       | 1       | 3       | 2       | 1       | 0       | 1       | 3       | 1       | 3       | 8       | 0       | 2       | 4       |
| 1.3.1.-    | 0       | 0       | 0       | 0       | 0       | 1       | 1       | 0       | 0       | 0       | 0       | 0       | 0       | 0       |
| 1.3.1.2    | 0       | 0       | 0       | 0       | 0       | 0       | 0       | 0       | 0       | 1       | 0       | 0       | 0       | 1       |
| 1.3.1.25   | 0       | 0       | 0       | 0       | 0       | 0       | 0       | 0       | 0       | 0       | 1       | 0       | 0       | 0       |
| 1.3.99.-   | 0       | 0       | 0       | 0       | 0       | 0       | 0       | 0       | 2       | 0       | 0       | 0       | 0       | 1       |
| 1.6.5.-    | 36      | 25      | 24      | 28      | 26      | 15      | 21      | 14      | 13      | 26      | 11      | 0       | 4       | 4       |
| 1.7.1.-    | 8       | 4       | 2       | 4       | 4       | 5       | 3       | 8       | 4       | 1       | 2       | 1       | 1       | 2       |
| 1.8.99.3   | 0       | 0       | 0       | 0       | 0       | 0       | 0       | 0       | 0       | 0       | 0       | 0       | 0       | 0       |
| 2.1.1.-    | 146     | 103     | 130     | 148     | 105     | 54      | 88      | 115     | 89      | 100     | 73      | 18      | 56      | 66      |
| 2.3.1.-    | 62      | 56      | 62      | 56      | 55      | 37      | 64      | 57      | 40      | 72      | 75      | 12      | 23      | 28      |
| 2.3.1.16   | 0       | 0       | 2       | 2       | 0       | 0       | 0       | 0       | 1       | 1       | 3       | 0       | 0       | 0       |
| 2.3.1.5    | 0       | 0       | 0       | 1       | 0       | 0       | 0       | 0       | 0       | 0       | 2       | 0       | 0       | 1       |
| 2.3.1.9    | 0       | 0       | 0       | 0       | 0       | 0       | 0       | 1       | 1       | 0       | 6       | 0       | 0       | 2       |
| 2.4.2.10   | 12      | 10      | 7       | 7       | 6       | 3       | 5       | 10      | 7       | 7       | 4       | 2       | 6       | 5       |
| 2.4.2.3    | 3       | 2       | 1       | 3       | 4       | 1       | 3       | 4       | 5       | 1       | 2       | 0       | 2       | 6       |
| 2.4.2.4    | 0       | 1       | 1       | 2       | 2       | 0       | 0       | 2       | 0       | 1       | 0       | 0       | 0       | 0       |
| 2.4.2.8    | 8       | 4       | 4       | 5       | 5       | 5       | 2       | 5       | 5       | 5       | 2       | 1       | 4       | 7       |
| 2.5.1.-    | 12      | 9       | 11      | 19      | 11      | 5       | 3       | 8       | 5       | 9       | 10      | 3       | 3       | 3       |

| EC/KO    | IT-AD-6 | JP-AD-1 | JP-AD-2 | JP-AD-3 | JP-AD-4 | JP-AD-7 | JP-AD-8 | JP-AD-9 | JP-CH-1 | JP-CH-2 | JP-IN-1 | JP-IN-2 | JP-IN-3 | JP-IN-4 |
|----------|---------|---------|---------|---------|---------|---------|---------|---------|---------|---------|---------|---------|---------|---------|
| 2.5.1.18 | 0       | 0       | 1       | 2       | 2       | 0       | 0       | 3       | 1       | 0       | 16      | 0       | 0       | 4       |
| 2.6.1.-  | 6       | 12      | 6       | 12      | 13      | 12      | 8       | 9       | 7       | 14      | 6       | 0       | 4       | 4       |
| 2.7.1.21 | 6       | 2       | 1       | 2       | 1       | 2       | 3       | 0       | 6       | 6       | 3       | 0       | 1       | 2       |
| 2.7.1.48 | 20      | 10      | 10      | 20      | 10      | 5       | 9       | 14      | 11      | 15      | 1       | 1       | 3       | 3       |
| 2.7.4.-  | 3       | 8       | 5       | 5       | 7       | 5       | 7       | 7       | 4       | 5       | 1       | 1       | 2       | 3       |
| 2.8.3.-  | 1       | 0       | 0       | 1       | 0       | 0       | 0       | 0       | 0       | 1       | 1       | 0       | 1       | 2       |
| 2.8.3.1  | 1       | 0       | 1       | 0       | 0       | 0       | 0       | 0       | 0       | 0       | 0       | 0       | 0       | 1       |
| 2.8.3.12 | 2       | 1       | 0       | 1       | 0       | 0       | 0       | 0       | 0       | 0       | 0       | 0       | 0       | 0       |
| 2.8.3.6  | 0       | 0       | 0       | 1       | 0       | 0       | 0       | 0       | 1       | 1       | 1       | 0       | 0       | 0       |
| 2.8.3.8  | 2       | 0       | 2       | 2       | 1       | 0       | 0       | 3       | 1       | 0       | 1       | 0       | 0       | 5       |
| 3.1.1.-  | 1       | 2       | 4       | 3       | 3       | 0       | 2       | 3       | 2       | 2       | 6       | 0       | 0       | 8       |
| 3.1.1.1  | 1       | 5       | 2       | 4       | 0       | 0       | 3       | 1       | 3       | 4       | 0       | 0       | 0       | 1       |
| 3.1.1.17 | 0       | 0       | 0       | 1       | 0       | 0       | 0       | 0       | 0       | 2       | 4       | 0       | 0       | 0       |
| 3.1.1.2  | 0       | 0       | 0       | 0       | 0       | 0       | 0       | 0       | 0       | 0       | 4       | 1       | 0       | 2       |
| 3.1.1.24 | 5       | 2       | 1       | 1       | 0       | 1       | 2       | 1       | 0       | 0       | 3       | 0       | 2       | 0       |
| 3.1.1.45 | 0       | 0       | 1       | 0       | 0       | 0       | 0       | 0       | 0       | 0       | 3       | 0       | 0       | 1       |
| 3.1.2.-  | 1       | 0       | 0       | 1       | 0       | 0       | 1       | 0       | 2       | 0       | 5       | 1       | 3       | 2       |
| 3.1.2.23 | 2       | 1       | 0       | 0       | 0       | 1       | 2       | 2       | 2       | 4       | 0       | 0       | 0       | 0       |
| 3.1.3.1  | 9       | 7       | 2       | 6       | 5       | 3       | 8       | 5       | 6       | 5       | 1       | 0       | 0       | 3       |
| 3.1.3.2  | 3       | 2       | 0       | 6       | 2       | 2       | 2       | 0       | 0       | 2       | 3       | 0       | 0       | 3       |
| 3.1.3.41 | 0       | 0       | 1       | 0       | 2       | 0       | 0       | 0       | 0       | 0       | 0       | 1       | 0       | 1       |
| 3.2.1.31 | 2       | 4       | 2       | 5       | 4       | 0       | 0       | 2       | 0       | 2       | 3       | 1       | 4       | 2       |
| 3.3.2.9  | 0       | 0       | 0       | 1       | 0       | 0       | 0       | 0       | 0       | 0       | 1       | 0       | 0       | 0       |
| 3.5.1.-  | 13      | 8       | 6       | 6       | 10      | 3       | 7       | 9       | 8       | 5       | 5       | 3       | 2       | 3       |
| 3.5.1.4  | 4       | 2       | 2       | 3       | 0       | 0       | 0       | 1       | 1       | 1       | 0       | 1       | 0       | 2       |
| 3.5.1.5  | 1       | 0       | 0       | 2       | 1       | 0       | 0       | 0       | 0       | 2       | 2       | 0       | 1       | 2       |
| 3.5.1.54 | 4       | 0       | 6       | 6       | 1       | 1       | 0       | 1       | 1       | 1       | 12      | 3       | 1       | 2       |
| 3.5.1.6  | 2       | 2       | 2       | 3       | 0       | 0       | 0       | 1       | 0       | 0       | 5       | 0       | 0       | 1       |
| 3.5.2.-  | 0       | 0       | 0       | 0       | 1       | 0       | 1       | 1       | 0       | 0       | 2       | 0       | 0       | 0       |
| 3.5.2.2  | 1       | 0       | 1       | 1       | 0       | 0       | 0       | 0       | 0       | 0       | 0       | 1       | 1       | 0       |
| 3.5.4.-  | 19      | 7       | 5       | 13      | 10      | 6       | 8       | 7       | 8       | 16      | 5       | 5       | 3       | 4       |
| 3.5.4.5  | 8       | 4       | 3       | 3       | 1       | 5       | 4       | 6       | 3       | 4       | 1       | 0       | 1       | 2       |
| 3.5.5.1  | 0       | 0       | 0       | 2       | 0       | 0       | 2       | 0       | 1       | 0       | 1       | 0       | 0       | 0       |
| 3.5.5.7  | 0       | 0       | 0       | 0       | 0       | 0       | 0       | 0       | 0       | 0       | 0       | 0       | 0       | 0       |
| 3.5.99.3 | 0       | 0       | 0       | 0       | 0       | 0       | 0       | 0       | 0       | 0       | 0       | 0       | 0       | 1       |
| 3.6.1.7  | 5       | 3       | 4       | 4       | 1       | 0       | 1       | 4       | 4       | 1       | 2       | 1       | 5       | 3       |
| 3.7.1.-  | 1       | 1       | 2       | 2       | 1       | 0       | 1       | 1       | 2       | 1       | 5       | 0       | 1       | 0       |
| 3.7.1.2  | 2       | 0       | 2       | 0       | 1       | 0       | 1       | 1       | 0       | 2       | 0       | 0       | 0       | 0       |
| 3.8.1.2  | 4       | 2       | 2       | 0       | 2       | 1       | 1       | 3       | 2       | 4       | 5       | 1       | 0       | 1       |
| 3.8.1.3  | 0       | 0       | 0       | 0       | 0       | 0       | 0       | 0       | 0       | 0       | 0       | 0       | 0       | 0       |
| 3.8.1.5  | 0       | 1       | 0       | 3       | 1       | 0       | 2       | 2       | 2       | 0       | 4       | 2       | 3       | 0       |
| 4.1.1.-  | 10      | 4       | 6       | 5       | 5       | 1       | 11      | 3       | 7       | 4       | 17      | 0       | 1       | 6       |
| 4.1.1.44 | 48      | 16      | 16      | 10      | 14      | 3       | 7       | 13      | 13      | 11      | 3       | 3       | 1       | 4       |
| 4.1.1.55 | 0       | 0       | 0       | 0       | 0       | 0       | 0       | 0       | 0       | 0       | 0       | 0       | 0       | 0       |
| 4.1.1.7  | 0       | 0       | 0       | 0       | 0       | 0       | 0       | 0       | 0       | 0       | 0       | 0       | 0       | 0       |
| 4.1.1.70 | 0       | 0       | 0       | 0       | 0       | 0       | 0       | 0       | 0       | 0       | 0       | 0       | 0       | 0       |
| 4.1.1.77 | 0       | 0       | 0       | 0       | 0       | 0       | 0       | 0       | 0       | 0       | 0       | 0       | 0       | 0       |
| 4.1.2.-  | 5       | 1       | 5       | 10      | 2       | 3       | 3       | 6       | 2       | 3       | 13      | 0       | 3       | 5       |
| 4.1.3.-  | 17      | 9       | 6       | 12      | 8       | 5       | 6       | 11      | 8       | 6       | 4       | 0       | 2       | 4       |



| EC/KO    | IT-AD-6 | JP-AD-1 | JP-AD-2 | JP-AD-3 | JP-AD-4 | JP-AD-7 | JP-AD-8 | JP-AD-9 | JP-CH-1 | JP-CH-2 | JP-IN-1 | JP-IN-2 | JP-IN-3 | JP-IN-4 |
|----------|---------|---------|---------|---------|---------|---------|---------|---------|---------|---------|---------|---------|---------|---------|
| 4.1.3.39 | 0       | 0       | 0       | 0       | 0       | 0       | 0       | 0       | 0       | 0       | 0       | 0       | 0       | 0       |
| 4.1.99.- | 0       | 0       | 0       | 0       | 1       | 2       | 0       | 1       | 0       | 1       | 0       | 0       | 0       | 1       |
| 4.2.1.-  | 26      | 20      | 14      | 14      | 16      | 5       | 17      | 26      | 18      | 18      | 5       | 1       | 4       | 8       |
| 4.2.1.17 | 6       | 2       | 0       | 7       | 0       | 2       | 1       | 7       | 5       | 4       | 6       | 0       | 0       | 2       |
| 4.2.1.80 | 0       | 0       | 0       | 0       | 0       | 0       | 0       | 0       | 0       | 0       | 3       | 0       | 0       | 0       |
| 4.2.1.83 | 0       | 0       | 0       | 0       | 0       | 0       | 0       | 0       | 0       | 0       | 0       | 0       | 0       | 0       |
| 4.2.1.84 | 0       | 0       | 0       | 0       | 0       | 0       | 0       | 0       | 2       | 0       | 0       | 0       | 0       | 0       |
| 5.1.2.2  | 0       | 0       | 0       | 0       | 0       | 0       | 0       | 0       | 0       | 0       | 0       | 0       | 0       | 0       |
| 5.2.1.2  | 0       | 0       | 0       | 0       | 0       | 0       | 0       | 0       | 0       | 0       | 0       | 0       | 0       | 0       |
| 5.3.3.4  | 0       | 0       | 1       | 0       | 0       | 0       | 0       | 0       | 0       | 0       | 0       | 2       | 0       | 0       |
| 5.3.99.- | 2       | 1       | 4       | 1       | 0       | 2       | 2       | 6       | 1       | 1       | 2       | 0       | 4       | 6       |
| 5.4.99.- | 2       | 0       | 0       | 2       | 0       | 0       | 0       | 0       | 0       | 0       | 0       | 0       | 0       | 0       |
| 5.5.1.1  | 0       | 1       | 1       | 3       | 0       | 0       | 1       | 2       | 0       | 1       | 2       | 0       | 0       | 1       |
| 5.5.1.2  | 0       | 0       | 0       | 0       | 0       | 0       | 0       | 0       | 0       | 0       | 0       | 0       | 0       | 0       |
| 6.2.1.-  | 0       | 0       | 0       | 0       | 0       | 0       | 0       | 0       | 0       | 0       | 2       | 0       | 0       | 0       |
| 6.3.5.2  | 6       | 10      | 12      | 6       | 8       | 3       | 4       | 3       | 6       | 7       | 2       | 6       | 4       | 10      |
| K00002   | 0       | 0       | 0       | 1       | 0       | 0       | 0       | 1       | 1       | 0       | 0       | 0       | 1       | 0       |
| K00055   | 0       | 0       | 0       | 0       | 0       | 0       | 1       | 0       | 0       | 0       | 0       | 0       | 0       | 0       |
| K00074   | 2       | 5       | 4       | 5       | 3       | 2       | 3       | 5       | 4       | 0       | 2       | 0       | 1       | 2       |
| K00088   | 6       | 3       | 6       | 12      | 4       | 2       | 6       | 3       | 4       | 9       | 5       | 4       | 4       | 5       |
| K00100   | 23      | 20      | 28      | 32      | 28      | 15      | 20      | 21      | 17      | 32      | 20      | 9       | 9       | 23      |
| K00128   | 0       | 1       | 0       | 0       | 1       | 0       | 1       | 1       | 1       | 0       | 6       | 1       | 2       | 3       |
| K00129   | 0       | 0       | 0       | 0       | 0       | 0       | 0       | 0       | 0       | 0       | 0       | 0       | 0       | 0       |
| K00132   | 0       | 0       | 0       | 0       | 0       | 0       | 0       | 0       | 2       | 1       | 2       | 0       | 0       | 1       |
| K00141   | 0       | 0       | 0       | 0       | 0       | 0       | 0       | 0       | 0       | 0       | 2       | 0       | 0       | 0       |
| K00146   | 0       | 0       | 0       | 0       | 0       | 0       | 0       | 0       | 0       | 0       | 1       | 0       | 0       | 0       |
| K00148   | 0       | 0       | 0       | 0       | 0       | 0       | 0       | 0       | 0       | 0       | 0       | 0       | 0       | 0       |
| K00155   | 0       | 0       | 0       | 0       | 0       | 0       | 0       | 0       | 0       | 0       | 1       | 0       | 0       | 0       |
| K00169   | 0       | 0       | 0       | 0       | 1       | 0       | 0       | 0       | 0       | 0       | 0       | 0       | 0       | 0       |
| K00224   | 0       | 0       | 0       | 1       | 0       | 0       | 0       | 0       | 0       | 0       | 0       | 0       | 0       | 0       |
| K00274   | 0       | 0       | 0       | 0       | 0       | 0       | 0       | 0       | 0       | 0       | 0       | 0       | 0       | 0       |
| K00446   | 0       | 0       | 0       | 0       | 0       | 0       | 0       | 0       | 0       | 0       | 0       | 0       | 0       | 0       |
| K00448   | 0       | 0       | 0       | 0       | 0       | 0       | 0       | 0       | 0       | 0       | 0       | 0       | 0       | 0       |
| K00462   | 0       | 0       | 2       | 1       | 0       | 0       | 0       | 0       | 1       | 0       | 1       | 0       | 0       | 0       |
| K00480   | 0       | 0       | 0       | 0       | 1       | 0       | 0       | 0       | 0       | 0       | 0       | 0       | 0       | 0       |
| K00481   | 0       | 0       | 0       | 0       | 0       | 0       | 0       | 0       | 0       | 0       | 1       | 0       | 0       | 0       |
| K00539   | 0       | 0       | 0       | 0       | 0       | 0       | 0       | 0       | 0       | 1       | 0       | 0       | 0       | 0       |
| K00599   | 27      | 20      | 12      | 16      | 17      | 13      | 16      | 22      | 10      | 14      | 4       | 3       | 15      | 5       |
| K00626   | 0       | 1       | 3       | 4       | 1       | 0       | 1       | 3       | 1       | 1       | 4       | 0       | 0       | 2       |
| K00632   | 0       | 0       | 0       | 1       | 0       | 0       | 0       | 0       | 1       | 1       | 2       | 0       | 0       | 0       |
| K00680   | 17      | 13      | 16      | 20      | 17      | 5       | 12      | 7       | 11      | 19      | 12      | 5       | 4       | 8       |
| K00757   | 11      | 6       | 3       | 2       | 6       | 3       | 5       | 2       | 5       | 4       | 3       | 0       | 1       | 7       |
| K00758   | 3       | 1       | 3       | 2       | 2       | 0       | 1       | 0       | 2       | 0       | 2       | 0       | 1       | 3       |
| K00760   | 17      | 5       | 6       | 9       | 9       | 5       | 7       | 8       | 7       | 8       | 4       | 1       | 6       | 7       |
| K00799   | 1       | 0       | 0       | 2       | 1       | 0       | 0       | 0       | 0       | 0       | 19      | 0       | 0       | 1       |
| K00857   | 10      | 6       | 3       | 5       | 3       | 2       | 4       | 3       | 7       | 7       | 4       | 0       | 2       | 2       |
| K00876   | 13      | 10      | 8       | 20      | 8       | 4       | 6       | 8       | 10      | 12      | 3       | 0       | 3       | 1       |
| K01026   | 1       | 0       | 0       | 3       | 0       | 0       | 0       | 2       | 0       | 0       | 0       | 0       | 1       | 0       |
| K01031   | 0       | 0       | 0       | 1       | 0       | 0       | 0       | 0       | 1       | 0       | 0       | 0       | 0       | 0       |

| EC/KO  | IT-AD-6 | JP-AD-1 | JP-AD-2 | JP-AD-3 | JP-AD-4 | JP-AD-7 | JP-AD-8 | JP-AD-9 | JP-CH-1 | JP-CH-2 | JP-IN-1 | JP-IN-2 | JP-IN-3 | JP-IN-4 |
|--------|---------|---------|---------|---------|---------|---------|---------|---------|---------|---------|---------|---------|---------|---------|
| K01034 | 0       | 1       | 0       | 1       | 2       | 0       | 1       | 0       | 0       | 0       | 0       | 0       | 0       | 1       |
| K01039 | 0       | 0       | 0       | 0       | 0       | 0       | 0       | 0       | 0       | 0       | 0       | 0       | 0       | 0       |
| K01041 | 1       | 2       | 0       | 3       | 1       | 1       | 5       | 1       | 1       | 1       | 1       | 0       | 0       | 1       |
| K01053 | 0       | 0       | 0       | 1       | 0       | 0       | 0       | 0       | 0       | 0       | 0       | 0       | 0       | 0       |
| K01055 | 0       | 0       | 0       | 1       | 0       | 0       | 0       | 0       | 0       | 0       | 5       | 0       | 0       | 0       |
| K01061 | 0       | 0       | 1       | 0       | 0       | 0       | 0       | 0       | 0       | 1       | 6       | 0       | 0       | 1       |
| K01066 | 1       | 5       | 3       | 6       | 2       | 1       | 2       | 1       | 2       | 4       | 2       | 0       | 1       | 4       |
| K01075 | 0       | 0       | 0       | 0       | 0       | 1       | 0       | 0       | 0       | 0       | 2       | 0       | 0       | 1       |
| K01077 | 1       | 4       | 2       | 1       | 2       | 2       | 5       | 1       | 4       | 3       | 5       | 0       | 1       | 3       |
| K01101 | 1       | 1       | 1       | 2       | 3       | 0       | 1       | 3       | 0       | 1       | 0       | 0       | 5       | 3       |
| K01195 | 3       | 3       | 2       | 5       | 3       | 0       | 2       | 1       | 0       | 4       | 1       | 2       | 4       | 1       |
| K01426 | 0       | 1       | 0       | 1       | 0       | 0       | 0       | 0       | 0       | 0       | 1       | 0       | 1       | 2       |
| K01428 | 0       | 0       | 0       | 0       | 0       | 0       | 0       | 0       | 0       | 0       | 2       | 0       | 1       | 1       |
| K01457 | 0       | 0       | 0       | 1       | 0       | 0       | 0       | 0       | 0       | 0       | 3       | 0       | 0       | 0       |
| K01464 | 2       | 0       | 4       | 3       | 0       | 1       | 0       | 0       | 1       | 0       | 2       | 0       | 1       | 2       |
| K01489 | 7       | 5       | 4       | 8       | 5       | 5       | 4       | 10      | 7       | 6       | 2       | 1       | 1       | 4       |
| K01500 | 0       | 0       | 0       | 0       | 0       | 0       | 0       | 0       | 0       | 0       | 0       | 0       | 1       | 0       |
| K01501 | 0       | 1       | 1       | 2       | 0       | 0       | 1       | 0       | 4       | 0       | 0       | 0       | 1       | 0       |
| K01502 | 0       | 0       | 0       | 0       | 0       | 0       | 0       | 0       | 0       | 0       | 0       | 0       | 0       | 0       |
| K01512 | 9       | 4       | 7       | 7       | 2       | 1       | 1       | 4       | 5       | 2       | 7       | 2       | 5       | 3       |
| K01560 | 4       | 4       | 3       | 4       | 7       | 0       | 3       | 2       | 5       | 3       | 1       | 3       | 3       | 3       |
| K01561 | 0       | 0       | 0       | 0       | 0       | 0       | 0       | 0       | 0       | 0       | 0       | 0       | 0       | 1       |
| K01563 | 0       | 0       | 0       | 0       | 0       | 0       | 0       | 0       | 0       | 0       | 0       | 0       | 0       | 0       |
| K01564 | 0       | 0       | 1       | 1       | 0       | 0       | 0       | 0       | 0       | 0       | 1       | 0       | 0       | 0       |
| K01607 | 10      | 6       | 4       | 6       | 4       | 2       | 4       | 6       | 4       | 6       | 3       | 1       | 1       | 4       |
| K01612 | 0       | 0       | 0       | 0       | 0       | 0       | 0       | 0       | 0       | 0       | 0       | 0       | 0       | 0       |
| K01615 | 3       | 6       | 10      | 9       | 8       | 4       | 7       | 3       | 4       | 9       | 0       | 0       | 0       | 3       |
| K01617 | 0       | 0       | 0       | 0       | 0       | 0       | 0       | 0       | 0       | 0       | 0       | 0       | 0       | 0       |
| K01666 | 0       | 1       | 1       | 2       | 0       | 1       | 1       | 1       | 0       | 0       | 2       | 0       | 0       | 0       |
| K01692 | 0       | 0       | 0       | 0       | 0       | 0       | 0       | 1       | 0       | 0       | 2       | 0       | 1       | 0       |
| K01721 | 0       | 0       | 0       | 0       | 0       | 0       | 0       | 0       | 0       | 0       | 2       | 0       | 0       | 0       |
| K01726 | 2       | 2       | 1       | 3       | 2       | 1       | 1       | 6       | 0       | 1       | 3       | 0       | 0       | 1       |
| K01781 | 0       | 0       | 0       | 0       | 0       | 0       | 0       | 1       | 0       | 0       | 0       | 0       | 0       | 0       |
| K01821 | 1       | 0       | 1       | 1       | 1       | 1       | 1       | 1       | 1       | 0       | 4       | 0       | 1       | 1       |
| K01856 | 0       | 0       | 0       | 0       | 0       | 0       | 0       | 0       | 0       | 0       | 0       | 0       | 0       | 0       |
| K01857 | 0       | 0       | 0       | 0       | 0       | 0       | 0       | 1       | 0       | 0       | 1       | 0       | 1       | 0       |
| K01913 | 0       | 0       | 0       | 0       | 0       | 0       | 0       | 0       | 0       | 0       | 0       | 0       | 0       | 0       |
| K01951 | 2       | 6       | 10      | 7       | 6       | 3       | 3       | 2       | 7       | 9       | 5       | 3       | 5       | 7       |
| K02554 | 0       | 0       | 0       | 1       | 0       | 1       | 0       | 0       | 0       | 0       | 1       | 0       | 0       | 0       |
| K03381 | 0       | 0       | 0       | 0       | 0       | 0       | 0       | 0       | 0       | 0       | 0       | 0       | 0       | 0       |
| K03382 | 0       | 0       | 0       | 0       | 0       | 0       | 0       | 0       | 2       | 0       | 1       | 0       | 0       | 1       |
| K03464 | 0       | 0       | 0       | 0       | 0       | 0       | 0       | 0       | 0       | 0       | 0       | 0       | 0       | 0       |
| K03518 | 24      | 5       | 6       | 7       | 6       | 5       | 6       | 7       | 8       | 4       | 2       | 0       | 3       | 9       |
| K03862 | 0       | 0       | 0       | 0       | 0       | 0       | 0       | 0       | 0       | 0       | 3       | 0       | 0       | 0       |
| K04099 | 0       | 0       | 0       | 0       | 0       | 0       | 0       | 0       | 0       | 0       | 0       | 0       | 0       | 0       |
| K04100 | 0       | 0       | 0       | 0       | 0       | 0       | 0       | 0       | 0       | 0       | 1       | 0       | 0       | 0       |
| K04102 | 0       | 0       | 0       | 0       | 0       | 0       | 0       | 0       | 0       | 0       | 0       | 0       | 0       | 0       |
| K04116 | 0       | 0       | 0       | 0       | 0       | 0       | 0       | 0       | 0       | 0       | 1       | 0       | 0       | 0       |
| K05394 | 0       | 0       | 1       | 0       | 1       | 0       | 0       | 0       | 0       | 1       | 0       | 0       | 0       | 0       |

| EC/KO  | IT-AD-6 | JP-AD-1 | JP-AD-2 | JP-AD-3 | JP-AD-4 | JP-AD-7 | JP-AD-8 | JP-AD-9 | JP-CH-1 | JP-CH-2 | JP-IN-1 | JP-IN-2 | JP-IN-3 | JP-IN-4 |
|--------|---------|---------|---------|---------|---------|---------|---------|---------|---------|---------|---------|---------|---------|---------|
| K05549 | 0       | 0       | 0       | 0       | 0       | 0       | 0       | 0       | 0       | 0       | 2       | 0       | 0       | 0       |
| K05783 | 0       | 0       | 0       | 0       | 0       | 0       | 0       | 0       | 0       | 0       | 0       | 0       | 0       | 0       |
| K05797 | 0       | 0       | 0       | 0       | 0       | 0       | 0       | 0       | 0       | 0       | 0       | 0       | 0       | 0       |
| K06281 | 0       | 1       | 1       | 1       | 0       | 0       | 0       | 0       | 0       | 1       | 2       | 0       | 0       | 2       |
| K06446 | 5       | 5       | 9       | 4       | 2       | 0       | 2       | 5       | 2       | 4       | 0       | 0       | 1       | 0       |
| K06912 | 0       | 0       | 0       | 0       | 0       | 0       | 0       | 0       | 0       | 0       | 0       | 0       | 0       | 0       |
| K07535 | 0       | 0       | 0       | 0       | 0       | 0       | 0       | 0       | 0       | 0       | 0       | 0       | 0       | 0       |
| K07536 | 3       | 4       | 1       | 3       | 2       | 2       | 0       | 2       | 0       | 1       | 2       | 0       | 0       | 3       |
| K08689 | 0       | 0       | 0       | 0       | 0       | 0       | 0       | 0       | 0       | 0       | 0       | 0       | 0       | 0       |
| K08710 | 0       | 0       | 0       | 0       | 0       | 0       | 0       | 0       | 1       | 0       | 1       | 0       | 0       | 0       |
| K09461 | 0       | 0       | 0       | 0       | 1       | 0       | 1       | 0       | 2       | 1       | 0       | 1       | 0       | 0       |
| K10217 | 0       | 0       | 0       | 0       | 0       | 0       | 0       | 0       | 0       | 0       | 0       | 0       | 0       | 0       |
| K10218 | 1       | 0       | 1       | 0       | 0       | 0       | 0       | 0       | 1       | 1       | 0       | 0       | 0       | 0       |
| K10220 | 0       | 0       | 0       | 0       | 0       | 0       | 0       | 0       | 0       | 0       | 0       | 0       | 0       | 0       |
| K11180 | 0       | 1       | 0       | 0       | 0       | 0       | 0       | 0       | 0       | 0       | 0       | 0       | 0       | 0       |
| K13953 | 1       | 0       | 0       | 0       | 0       | 0       | 0       | 0       | 2       | 0       | 5       | 1       | 0       | 1       |
| K14333 | 0       | 0       | 0       | 0       | 0       | 0       | 0       | 0       | 1       | 0       | 1       | 0       | 0       | 0       |
| K14519 | 0       | 0       | 1       | 0       | 0       | 0       | 0       | 0       | 0       | 0       | 1       | 0       | 0       | 0       |
| K15054 | 0       | 0       | 0       | 0       | 0       | 0       | 0       | 0       | 0       | 0       | 3       | 0       | 0       | 0       |
| K16173 | 0       | 0       | 0       | 3       | 0       | 0       | 0       | 2       | 0       | 0       | 0       | 0       | 0       | 1       |
| K16514 | 0       | 0       | 1       | 0       | 0       | 0       | 0       | 0       | 0       | 0       | 2       | 0       | 0       | 0       |
| K16874 | 0       | 0       | 0       | 0       | 0       | 0       | 0       | 0       | 0       | 0       | 0       | 0       | 0       | 0       |
