# Supplementary material for: Xenobiotic Metabolism and Gut Microbiomes
Source: PubMed Central journal article supplement (PMC5047465; doi:10.1371/journal.pone.0163099), 2016-10-03
Supplement: pone.0163099.s028.pdf [file pone.0163099.s028.pdf]

| <b>Microbial Family</b> | <b>Cluster number :<br/>Group specificity</b> | <b>Microbial Family</b> | <b>Cluster number :<br/>Group specificity</b> | <b>Microbial Family</b> | <b>Cluster number : Group<br/>specificity</b> |
|-------------------------|-----------------------------------------------|-------------------------|-----------------------------------------------|-------------------------|-----------------------------------------------|
| Desulfobulbaceae        | C1 : G2 Specific                              | Cellulomonadaceae       | C1 : G2 Specific                              | Picrophilaceae          | C3 : G1 specific                              |
| Deferritbacteraceae     | C1 : G2 Specific                              | Carnobacteriaceae       | C1 : G2 Specific                              | Peptostreptococcaceae   | C3 : G1 specific                              |
| Ectothiorhodospiraceae  | C1 : G2 Specific                              | Cardiobacteriaceae      | C1 : G2 Specific                              | Pentatomidae            | C3 : G1 specific                              |
| Methylophilaceae        | C1 : G2 Specific                              | Brachyspiraceae         | C1 : G2 Specific                              | Parachlamydiaceae       | C3 : G1 specific                              |
| Porphyromonadaceae      | C1 : G2 Specific                              | Beutenbergiaceae        | C1 : G2 Specific                              | Oscillospiraceae        | C3 : G1 specific                              |
| Thermoanaerobacteraceae | C1 : G2 Specific                              | Bdellovibrionaceae      | C1 : G2 Specific                              | Orobanchaceae           | C3 : G1 specific                              |
| Peptococcaceae          | C1 : G2 Specific                              | Bartonellaceae          | C1 : G2 Specific                              | Opisthorchiidae         | C3 : G1 specific                              |
| Enterobacteriaceae      | C1 : G2 Specific                              | Bacteroidaceae          | C1 : G2 Specific                              | Nitrosopumilaceae       | C3 : G1 specific                              |
| Chlorobiaceae           | C1 : G2 Specific                              | Bacteriovoracaceae      | C1 : G2 Specific                              | Mycoplasmataceae        | C3 : G1 specific                              |
| Aquificaceae            | C1 : G2 Specific                              | Bacillidae              | C1 : G2 Specific                              | Moritellaceae           | C3 : G1 specific                              |
| Micrococcaceae          | C1 : G2 Specific                              | Anaerolinaceae          | C1 : G2 Specific                              | Microcystidae           | C3 : G1 specific                              |
| Thermotogaceae          | C1 : G2 Specific                              | Alicyclobacillaceae     | C1 : G2 Specific                              | Microchaetaceae         | C3 : G1 specific                              |
| Syntrophaceae           | C1 : G2 Specific                              | Alcanivoracaceae        | C1 : G2 Specific                              | Methylocystaceae        | C3 : G1 specific                              |
| Pasteurellaceae         | C1 : G2 Specific                              | Aerococcaceae           | C1 : G2 Specific                              | Methanothermaceae       | C3 : G1 specific                              |
| Nocardiodaceae          | C1 : G2 Specific                              | Acidothermaceae         | C1 : G2 Specific                              | Methanospirillaceae     | C3 : G1 specific                              |
| Coriobacteriaceae       | C1 : G2 Specific                              | Acidobacteriaceae       | C1 : G2 Specific                              | Methanosarcinaceae      | C3 : G1 specific                              |
| [Clostridiales]         | C1 : G2 Specific                              | Acidithiobacillaceae    | C1 : G2 Specific                              | Methanosaetaceae        | C3 : G1 specific                              |
| Campylobacteraceae      | C1 : G2 Specific                              | Acidimicrobiaceae       | C1 : G2 Specific                              | Methanopyraceae         | C3 : G1 specific                              |
| Aeromonadaceae          | C1 : G2 Specific                              | Acholeplasmataceae      | C1 : G2 Specific                              | Methanomicrobiaceae     | C3 : G1 specific                              |
| Waddliaceae             | C1 : G2 Specific                              | Actinosynnemataceae     | C2 : G1 and G2                                | Methanocorpusculaceae   | C3 : G1 specific                              |
| Vesicomyiidae           | C1 : G2 Specific                              | Actinomycetaceae        | C2 : G1 and G2                                | Methanococcaceae        | C3 : G1 specific                              |
| Verrucomicrobiaceae     | C1 : G2 Specific                              | Alteromonadaceae        | C2 : G1 and G2                                | Methanocaldococcaceae   | C3 : G1 specific                              |
| Tsukamurellaceae        | C1 : G2 Specific                              | Clostridiales           | C2 : G1 and G2                                | Methanobacteriaceae     | C3 : G1 specific                              |
| Trueperaceae            | C1 : G2 Specific                              | Cryomorphaceae          | C2 : G1 and G2                                | Lycoperdaceae           | C3 : G1 specific                              |
| Thermomicrobiaceae      | C1 : G2 Specific                              | Geobacteraceae          | C2 : G1 and G2                                | Kineosporiaceae         | C3 : G1 specific                              |
| Thermoanaerobacterales  | C1 : G2 Specific                              | Halobacteroidaceae      | C2 : G1 and G2                                | Halobacteriaceae        | C3 : G1 specific                              |
| Thermaceae              | C1 : G2 Specific                              | Halomonadaceae          | C2 : G1 and G2                                | Ferroplasmaceae         | C3 : G1 specific                              |
| Syntrophomonadaceae     | C1 : G2 Specific                              | Heliobacteriaceae       | C2 : G1 and G2                                | Erysipelotrichaceae     | C3 : G1 specific                              |
| Streptococcaceae        | C1 : G2 Specific                              | Lachnospiraceae         | C2 : G1 and G2                                | Entomoplasmataceae      | C3 : G1 specific                              |
| Staphylococcaceae       | C1 : G2 Specific                              | Lactobacillaceae        | C2 : G1 and G2                                | Desulfurococcaceae      | C3 : G1 specific                              |
| Sphaerobacteraceae      | C1 : G2 Specific                              | Legionellaceae          | C2 : G1 and G2                                | Dermabacteraceae        | C3 : G1 specific                              |
| Segniliparaceae         | C1 : G2 Specific                              | Leptospiraceae          | C2 : G1 and G2                                | Cyclobacteriaceae       | C3 : G1 specific                              |
| Sanguibacteraceae       | C1 : G2 Specific                              | Leuconostocaceae        | C2 : G1 and G2                                | Cucurbitaceae           | C3 : G1 specific                              |

| <b>Microbial Family</b> | <b>Cluster number :<br/>Group specificity</b> | <b>Microbial Family</b> | <b>Cluster number :<br/>Group specificity</b> | <b>Microbial Family</b> | <b>Cluster number : Group<br/>specificity</b> |
|-------------------------|-----------------------------------------------|-------------------------|-----------------------------------------------|-------------------------|-----------------------------------------------|
| Rhodothermaceae         | C1 : G2 Specific                              | Listeriaceae            | C2 : G1 and G2                                | Chlamydomonadaceae      | C3 : G1 specific                              |
| Puniceococcaceae        | C1 : G2 Specific                              | Nitrospiraceae          | C2 : G1 and G2                                | Chlamydiaceae           | C3 : G1 specific                              |
| Psychromonadaceae       | C1 : G2 Specific                              | Planococcaceae          | C2 : G1 and G2                                | Cenarchaeaceae          | C3 : G1 specific                              |
| Pseudococcidae          | C1 : G2 Specific                              | Promicromonosporaceae   | C2 : G1 and G2                                | Caricaceae              | C3 : G1 specific                              |
| Pseudoalteromonadaceae  | C1 : G2 Specific                              | Saprosiraceae           | C2 : G1 and G2                                | Caldisphaeraceae        | C3 : G1 specific                              |
| Proteidae               | C1 : G2 Specific                              | Streptomycetaceae       | C2 : G1 and G2                                | Caldilineaceae          | C3 : G1 specific                              |
| Prochlorococcaceae      | C1 : G2 Specific                              | Syntrophobacteraceae    | C2 : G1 and G2                                | Brevibacteriaceae       | C3 : G1 specific                              |
| Planctomycetaceae       | C1 : G2 Specific                              | Thermodesulfobiaceae    | C2 : G1 and G2                                | Bovidae                 | C3 : G1 specific                              |
| Pelobacteraceae         | C1 : G2 Specific                              | Thermomonosporaceae     | C2 : G1 and G2                                | Blattabacteriaceae      | C3 : G1 specific                              |
| Parvularculaceae        | C1 : G2 Specific                              | Flexibacteraceae        | C2 : G1 and G2                                | Aurantimonadaceae       | C3 : G1 specific                              |
| Opitutaceae             | C1 : G2 Specific                              | Rhodospirillaceae       | C2 : G1 and G2                                | Asteraceae              | C3 : G1 specific                              |
| Nocardopsaceae          | C1 : G2 Specific                              | Microbacteriaceae       | C2 : G1 and G2                                | Archaeoglobaceae        | C3 : G1 specific                              |
| Nocardiaceae            | C1 : G2 Specific                              | Fusobacteriaceae        | C2 : G1 and G2                                | Xanthomonadaceae        | C4 : G3 specific                              |
| Nitrosomonadaceae       | C1 : G2 Specific                              | Bacillaceae             | C2 : G1 and G2                                | Sphingomonadaceae       | C4 : G3 specific                              |
| Nautiliaceae            | C1 : G2 Specific                              | Paenibacillaceae        | C2 : G1 and G2                                | Moraxellaceae           | C4 : G3 specific                              |
| Natranaerobiaceae       | C1 : G2 Specific                              | Vibrionaceae            | C2 : G1 and G2                                | Desulfobacteraceae      | C4 : G3 specific                              |
| Nakamurellaceae         | C1 : G2 Specific                              | Flavobacteriaceae       | C2 : G1 and G2                                | Pseudonocardiaceae      | C4 : G3 specific                              |
| Mantidae                | C1 : G2 Specific                              | Spirochaetaceae         | C2 : G1 and G2                                | Sphingobacteriaceae     | C4 : G3 specific                              |
| Lythraceae              | C1 : G2 Specific                              | Neisseriaceae           | C2 : G1 and G2                                | Chloroflexaceae         | C4 : G3 specific                              |
| Jonesiaceae             | C1 : G2 Specific                              | Methylococcaceae        | C2 : G1 and G2                                | Caulobacteraceae        | C4 : G3 specific                              |
| Idiomarinaceae          | C1 : G2 Specific                              | Intrasporangiaceae      | C2 : G1 and G2                                | Rhodocyclaceae          | C4 : G3 specific                              |
| Hyphomicrobiaceae       | C1 : G2 Specific                              | Geodermatophilaceae     | C2 : G1 and G2                                | Rhizobiaceae            | C4 : G3 specific                              |
| Hydrogenothermaceae     | C1 : G2 Specific                              | Eubacteriaceae          | C2 : G1 and G2                                | Phyllobacteriaceae      | C4 : G3 specific                              |
| Hydrogenophilaceae      | C1 : G2 Specific                              | Enterococcaceae         | C2 : G1 and G2                                | Oceanospirillaceae      | C4 : G3 specific                              |
| Helicobacteraceae       | C1 : G2 Specific                              | Bifidobacteriaceae      | C2 : G1 and G2                                | Oxalobacteraceae        | C4 : G3 specific                              |
| Halothiobacillaceae     | C1 : G2 Specific                              | Anaplasmataceae         | C2 : G1 and G2                                | Comamonadaceae          | C4 : G3 specific                              |
| Haliangiaceae           | C1 : G2 Specific                              | Rhodobacteraceae        | C3 : G1 specific                              | Methylobacteriaceae     | C4 : G3 specific                              |
| Halanaerobiaceae        | C1 : G2 Specific                              | Piscirickettsiaceae     | C3 : G1 specific                              | Alcaligenaceae          | C4 : G3 specific                              |
| Glycomycetaceae         | C1 : G2 Specific                              | Chromatiaceae           | C3 : G1 specific                              | Burkholderiaceae        | C4 : G3 specific                              |
| Gemmatimonadaceae       | C1 : G2 Specific                              | Rickettsiaceae          | C3 : G1 specific                              | Xanthobacteraceae       | C4 : G3 specific                              |
| Gallionellaceae         | C1 : G2 Specific                              | Nostocaceae             | C3 : G1 specific                              | Bradyrhizobiaceae       | C4 : G3 specific                              |
| Francisellaceae         | C1 : G2 Specific                              | Ruminococcaceae         | C3 : G1 specific                              | Beijerinckiaceae        | C4 : G3 specific                              |
| Fibrobacteraceae        | C1 : G2 Specific                              | Veillonellaceae         | C3 : G1 specific                              | Hyphomonadaceae         | C4 : G3 specific                              |

| <b>Microbial Family</b> | <b>Cluster number :<br/>Group specificity</b> |  | <b>Microbial Family</b>   | <b>Cluster number :<br/>Group specificity</b> |  | <b>Microbial Family</b> | <b>Cluster number : Group<br/>specificity</b> |
|-------------------------|-----------------------------------------------|--|---------------------------|-----------------------------------------------|--|-------------------------|-----------------------------------------------|
| Ferrimonadaceae         | C1 : G2 Specific                              |  | Thiotrichaceae            | C3 : G1 specific                              |  | Myxococcaceae           | C4 : G3 specific                              |
| Erythrobacteraceae      | C1 : G2 Specific                              |  | Thermoproteaceae          | C3 : G1 specific                              |  | Brucellaceae            | C4 : G3 specific                              |
| Edwardsiidae            | C1 : G2 Specific                              |  | Thermoplasmataceae        | C3 : G1 specific                              |  | Pseudomonadaceae        | C4 : G3 specific                              |
| Dictyoglomaceae         | C1 : G2 Specific                              |  | Thermofilaceae            | C3 : G1 specific                              |  | Micromonosporaceae      | C4 : G3 specific                              |
| Desulfurobacteriaceae   | C1 : G2 Specific                              |  | Thermodesulfobacteriaceae | C3 : G1 specific                              |  | Streptosporangiaceae    | C4 : G3 specific                              |
| Desulfurellaceae        | C1 : G2 Specific                              |  | Thermococcaceae           | C3 : G1 specific                              |  | Shewanellaceae          | C4 : G3 specific                              |
| Desulfovibrionaceae     | C1 : G2 Specific                              |  | Theaceae                  | C3 : G1 specific                              |  | Rubrobacteraceae        | C4 : G3 specific                              |
| Desulfomicrobiaceae     | C1 : G2 Specific                              |  | Sulfolobaceae             | C3 : G1 specific                              |  | Polyangiaceae           | C4 : G3 specific                              |
| Desulfohalobiaceae      | C1 : G2 Specific                              |  | Spiroplasmataceae         | C3 : G1 specific                              |  | Mycobacteriaceae        | C4 : G3 specific                              |
| Desulfarculaceae        | C1 : G2 Specific                              |  | Simkaniaceae              | C3 : G1 specific                              |  | Herpetosiphonaceae      | C4 : G3 specific                              |
| Dermacoccaceae          | C1 : G2 Specific                              |  | Scytonemataceae           | C3 : G1 specific                              |  | Hahellaceae             | C4 : G3 specific                              |
| Deinococcaceae          | C1 : G2 Specific                              |  | Rivulariaceae             | C3 : G1 specific                              |  | Frankiaceae             | C4 : G3 specific                              |
| Coxiellaceae            | C1 : G2 Specific                              |  | Rikenellaceae             | C3 : G1 specific                              |  | Cystobacteraceae        | C4 : G3 specific                              |
| Corynebacteriaceae      | C1 : G2 Specific                              |  | Pyrodictiaceae            | C3 : G1 specific                              |  | Conexibacteraceae       | C4 : G3 specific                              |
| Colwelliaceae           | C1 : G2 Specific                              |  | Propionibacteriaceae      | C3 : G1 specific                              |  | Catenulisporaceae       | C4 : G3 specific                              |
| Clostridiaceae          | C1 : G2 Specific                              |  | Prevotellaceae            | C3 : G1 specific                              |  | Acetobacteraceae        | Equal propensity                              |
