# Supplementary material for: Xenobiotic Metabolism and Gut Microbiomes
Source: PubMed Central journal article supplement (PMC5047465; doi:10.1371/journal.pone.0163099), 2016-10-03
Supplement: pone.0163099.s029.pdf [file pone.0163099.s029.pdf]

| Xenobiotic Degradation Pathway                        | Drugs in the category                                                                        | Links |
|-------------------------------------------------------|----------------------------------------------------------------------------------------------|-------|
| Felbamate Cyclophosphamide and Ifosfamide Degradation | Cytoxan (TN); Cyclophosphamide (INN); Ifex; Ifosfamide                                       | 1     |
| Xylene Degradation                                    | Lidocaine                                                                                    | 2     |
| Chlorocyclohexane and Chlorobenzene Degradation       | Katasuccin; Succinic Acid; Assuccin;                                                         | 3     |
| Toluene Degradation                                   | Benzyl Alcohol; Butylated Hydroxytoulene                                                     | 4     |
| Chloroalkane and Chloroalkene Degradation             | Formalin; Oxomethane; Anadrol-50                                                             | 5     |
| Dioxin Degradation                                    | Benzenecarboxylic acid; Phenylformic acid; Dracylic acid; o-Hydroxybenzoic acid              | 6     |
| Ethylbenzene Degradation                              | Propanoic acid: Solubilizing agent in Drugs; Cumene; Benzenemethanol; Hydroxymethylbenzene   | 7     |
| Naphthalene Degradation                               | Salicylic acid; o-Hydroxybenzoic acid; Terbinafine (USAN/INN); Lamasil (TN); Tolnaftate      | 8     |
| Caprolactam Degradation                               | 6-Aminocaproic acid; Epsilcapramine; 6-Aminohexanoate;                                       | 9     |
| Bisphenol Degradation                                 | Bisphenol A; Diethylstilbestrol                                                              | 10    |
| Codeine and Morphine Degradation                      | Codeine (USP); Codeine hydrate; Morphine (BAN); Substitol (TN)                               | 11    |
| Azathioprine and 6- Mercaptopurine Degradation        | Azathioprine (JP16/USP/INN); Azasan (TN); Imuran (TN); Mercaptopurine (INN); Purinethol (TN) | 12    |
| Isoniazid Degradation                                 | Isoniazid (JP16/USP/INN); Laniazid (TN)                                                      | 13    |
| Fluorouracil and Irinotecan Degradation               | Fluorouracil, Adrucil, Carac; Campto (TN); Irinotecan hydrochloride (USAN); CPT 11;          | 14    |
| Tamoxifen Degradation                                 | Tamoxifen citrate (JP16/USP); Nolvadex (TN); Tamoplex (TN)                                   | 15    |
| Aminobenzoate Degradation                             | Ethyl aminobenzoate (JP16);Benzocaine (USP/INN);Parathesin (TN)                              | 16    |
| Benzoate Degradation                                  | Rizatriptan benzoate (JAN/USAN); Maxalt (TN); Phenylformic acid; o-Hydroxybenzoic acid       | 17    |
| Citalopram Degradation                                | Citalopram (USP/INN); Citadur (TN)                                                           | 18    |
| Cyclophosphamide and Ifosfamide Degradation           | Cytoxan (TN); Cyclophosphamide (INN); Ifex; Ifosfamide                                       | 19    |
| Metabolism of Xenobiotics- CYP450                     | Generic: All Drugs                                                                           | 20    |
| Steroid Degradation                                   | Range of Steroid based drugs.                                                                | 21    |
| Furfural Degradation                                  | 5-hydroxymethyl-2-furfural                                                                   | 22    |
| Fluorobenzoate Degradation                            | 3-(p-Fluorobenzoyloxy)tropane; triphenyltin 4-fluorobenzoate;                                | 23    |
| Styrene Degradation                                   | Polystyrene sulfonate based drugs;                                                           | 24    |
| Polycyclic Aromatic Hydrocarbon Degradation           | Benzocetamine; Valrubicin; Lumefantrine; Halofantrine; Nalbuphine                            | 25    |
| Atrazine Degradation                                  | NA                                                                                           | NA    |
| DDT Degradation                                       | NA                                                                                           | NA    |
| Nitrotoluene Degradation                              | NA                                                                                           | NA    |

#### Links:

1. [http://www.genome.jp/dbget-bin/www\\_bget?dr:D07760](http://www.genome.jp/dbget-bin/www_bget?dr:D07760) | [http://www.genome.jp/dbget-bin/www\\_bget?dr:D00343](http://www.genome.jp/dbget-bin/www_bget?dr:D00343) | [http://www.genome.jp/dbget-bin/www\\_bget?dg:DG01633](http://www.genome.jp/dbget-bin/www_bget?dg:DG01633) | [http://www.genome.jp/dbget-bin/www\\_bget?dg:DG01720](http://www.genome.jp/dbget-bin/www_bget?dg:DG01720)
2. [http://apps.who.int/iris/bitstream/10665/93142/1/EML\\_18\\_eng.pdf?ua=1](http://apps.who.int/iris/bitstream/10665/93142/1/EML_18_eng.pdf?ua=1)
3. [http://pubchem.ncbi.nlm.nih.gov/compound/succinic\\_acid#section=Top](http://pubchem.ncbi.nlm.nih.gov/compound/succinic_acid#section=Top) | <http://www.ncbi.nlm.nih.gov/pubmed/20036722>
4. <http://pubs.acs.org/doi/abs/10.1021/ja00411a035> | [http://www.genome.jp/dbget-bin/www\\_bget?cpd:C00556](http://www.genome.jp/dbget-bin/www_bget?cpd:C00556) | [http://www.genome.jp/kegg-bin/get\\_htext?br08312+C00556+D00077](http://www.genome.jp/kegg-bin/get_htext?br08312+C00556+D00077)
5. [http://www.genome.jp/dbget-bin/www\\_bget?cpd:C00067](http://www.genome.jp/dbget-bin/www_bget?cpd:C00067) | [http://www.medapharma.us/products/pi/Anadrol-50\\_PI.pdf](http://www.medapharma.us/products/pi/Anadrol-50_PI.pdf)
6. [http://www.genome.jp/dbget-bin/www\\_bget?cpd:C00180](http://www.genome.jp/dbget-bin/www_bget?cpd:C00180) | [http://www.genome.jp/dbget-bin/www\\_bget?cpd:C00805](http://www.genome.jp/dbget-bin/www_bget?cpd:C00805)
7. [http://www.genome.jp/dbget-bin/www\\_bget?cpd:C00556](http://www.genome.jp/dbget-bin/www_bget?cpd:C00556) | <http://www.fda.gov/downloads/drugs/guidancecomplianceregulatoryinformation/guidances/ucm073395.pdf>
8. [http://www.genome.jp/dbget-bin/www\\_bget?cpd:C00805](http://www.genome.jp/dbget-bin/www_bget?cpd:C00805) | [http://www.genome.jp/dbget-bin/www\\_bget?D02375+D02219](http://www.genome.jp/dbget-bin/www_bget?D02375+D02219)
9. [http://www.genome.jp/dbget-bin/www\\_bget?cpd:C02378](http://www.genome.jp/dbget-bin/www_bget?cpd:C02378)
10. [http://www.genome.jp/dbget-bin/www\\_bget?cpd:C13624](http://www.genome.jp/dbget-bin/www_bget?cpd:C13624) | [www.drugbank.ca](http://www.drugbank.ca)
11. [http://www.genome.jp/dbget-bin/www\\_bget?D00195+C06174](http://www.genome.jp/dbget-bin/www_bget?D00195+C06174) | [http://www.genome.jp/dbget-bin/www\\_bget?D08233+D00842+D02271](http://www.genome.jp/dbget-bin/www_bget?D08233+D00842+D02271)
12. [http://www.genome.jp/dbget-bin/www\\_bget?D00238+C06837](http://www.genome.jp/dbget-bin/www_bget?D00238+C06837)
13. [http://www.genome.jp/dbget-bin/www\\_bget?D00346+C07054](http://www.genome.jp/dbget-bin/www_bget?D00346+C07054)
14. [http://www.genome.jp/dbget-bin/www\\_bget?D00584+C07649](http://www.genome.jp/dbget-bin/www_bget?D00584+C07649) | [http://www.genome.jp/dbget-bin/www\\_bget?D08086+C16641](http://www.genome.jp/dbget-bin/www_bget?D08086+C16641)
15. [http://www.genome.jp/dbget-bin/www\\_bget?D00966+D08559](http://www.genome.jp/dbget-bin/www_bget?D00966+D08559)
16. [http://www.genome.jp/dbget-bin/www\\_bget?dr:D00552](http://www.genome.jp/dbget-bin/www_bget?dr:D00552)
17. [http://www.genome.jp/dbget-bin/www\\_bget?dr:D00675](http://www.genome.jp/dbget-bin/www_bget?dr:D00675)
18. [http://www.genome.jp/dbget-bin/www\\_bget?dr:D07704](http://www.genome.jp/dbget-bin/www_bget?dr:D07704)
19. [http://www.genome.jp/dbget-bin/www\\_bget?dr:D07760](http://www.genome.jp/dbget-bin/www_bget?dr:D07760) | [http://www.genome.jp/dbget-bin/www\\_bget?dr:D00343](http://www.genome.jp/dbget-bin/www_bget?dr:D00343) | [http://www.genome.jp/dbget-bin/www\\_bget?dg:DG01633](http://www.genome.jp/dbget-bin/www_bget?dg:DG01633) | [http://www.genome.jp/dbget-bin/www\\_bget?dg:DG01720](http://www.genome.jp/dbget-bin/www_bget?dg:DG01720)
20. [http://www.genome.jp/kegg-bin/show\\_pathway?map00982](http://www.genome.jp/kegg-bin/show_pathway?map00982)
21. <http://www.genome.jp/kegg/drug/br08317.html> | [http://www.genome.jp/dbget-bin/www\\_bget?dr:D00389](http://www.genome.jp/dbget-bin/www_bget?dr:D00389) | <http://www.ncbi.nlm.nih.gov/books/NBK47237/> | <http://www.hindawi.com/journals/isrn/2012/985495/>
22. <http://www.ncbi.nlm.nih.gov/pubmed/15686467>
23. <http://www.ncbi.nlm.nih.gov/pubmed/7669950> | <https://www.ncbi.nlm.nih.gov/pubmed/21083227>
24. [https://microbewiki.kenyon.edu/index.php/Styrene\\_metabolism\\_in\\_bacteria](https://microbewiki.kenyon.edu/index.php/Styrene_metabolism_in_bacteria) | <http://www.ncbi.nlm.nih.gov/pubmed/16823552>
25. [www.drugbank.ca](http://www.drugbank.ca)
