# Supplementary material for: Xenobiotic Metabolism and Gut Microbiomes
Source: PubMed Central journal article supplement (PMC5047465; doi:10.1371/journal.pone.0163099), 2016-10-03
Supplement: pone.0163099.s030.pdf [file pone.0163099.s030.pdf]

| Drug                     | Genera (Cluster Affiliation)                                                                                                                                            | References |
|--------------------------|-------------------------------------------------------------------------------------------------------------------------------------------------------------------------|------------|
| Rutin                    | Bacteroides(2)  Bacillus(2)  Veillonella(1)                                                                                                                             | 1          |
| Catechin and epicatechin | Clostridium(2)   Eubacterium(2),Bifidobacterium(2),Escherichia (2)                                                                                                      | 2          |
| Anthocyanins             | Streptococcus(2)   Eubacterium(2)   Clostridium(2)   Bacteroides(2)                                                                                                     | 3          |
| Genistin                 | Bacteroides(2)   Streptococcus(2)   Ruminococcus(2)  Enterococcus(1) Lactobacillus(2)   Finegoldia(2)   Veillonella(1) Clostridium(2)   Eubacterium(2)  Butyrivibrio(2) | 3          |
| Naringin                 | Clostridium (2)   Butyrivibrio (2)                                                                                                                                      | 3,4        |
| Digoxin                  | Eggerthella (2)   Eubacterium(2)                                                                                                                                        | 5          |
| Polyphenols              | Butyrivibrio (2)  Bacteroides(2)                                                                                                                                        | 6          |
| Gliadin                  | Bifidobacterium (2)   Enterobacteria (2)                                                                                                                                | 7          |
| Daidzein                 | Bacteroides (2) Streptococcus (2) Ruminococcus (2) Enterococcus(1) Lactobacillus (2)  Finegoldia (2) Veillonella(1) Clostridium (2) Eubacterium(2)                      | 3          |
| Sulphasalazine           | Escherichia (2) Bacteroides (2) Klebsiella(3) Pseudomonas(3) Staphylococcus (2) Proteus (2)                                                                             | 8          |
| Nitrazepam               | Clostridium (2)  Bacteroides (2)  Eubacterium (2)                                                                                                                       | 9          |
| Sulphinpyrazone          | Escherichia (2) Enterobacter (2) Providencia (1) Klebsiella (3)                                                                                                         | 10         |
| Sulindac                 | Escherichia (2) Proteus (2) Providencia (1) Klebsiella (3) Citrobacter (2) Pseudomonas (3)  Enterococcus (2)  Bacteroides (2)  Clostridium (2)                          | 10,11      |
| Quercetin-3-glucoside    | Eubacterium (2)   Enterococcus(1)                                                                                                                                       | 12         |

References:

- 1) Yang J. et. al. Identification of rutin deglycosylated metabolites produced by human intestinal bacteria using UPLC-Q-TOF/MS. *J Chromatogr B* **898**, 95-100 (2012).
- 2) Tzounis X. et. al. Flavanol monomer-induced changes to the human faecal microflora. *Br J Nutr.* **99**, 782-92 (2008).
- 3) Selma MV, Espín JC, Tomás-Barberán FA. Interaction between phenolics and gut microbiota: role in human health. *J Agric Food Chem.* **57**, 6485-501 (2009)
- 4) Cheng K. J., Krishnamurty H. G., Jones G. A., Simpson F. J. Identification of products produced by the anaerobic degradation of naringin by *Butyrivibrio* sp. C3. *Can. J. Microbiol.* **17**,129–131 (1971).
- 5) Saha J. R., Butler V. P. Jr., Neu H. C., Lindenbaum J. Digoxin-inactivating bacteria: identification in human gut flora. *Science.* **220**, 325-327 (1983).
- 6) Rowland I. R. Interactions of the gut microflora and the host in toxicology. *Toxicol Pathol.* **16**, 147-53 (1988)
- 7) Cinova J. et al. Role of Intestinal Bacteria in Gliadin-Induced Changes in Intestinal Mucosa: Study in Germ-Free Rats. Leulier F, ed. *PLoS ONE* **6**, e16169 (2011).
- 8) Azad Khan A. K., Guthrie G., Johnston H. H., Truelove S. C., Williamson D. H. Tissue and bacterial splitting of sulphasalazine. *Clin Sci (Lond).* **64**, 349-54 (1983).
- 9) Rafii F., Sutherland J. B., Hansen E. B. Jr., Cerniglia C. E. Reduction of nitrazepam by *Clostridium leptum*, a nitroreductase-producing bacterium isolated from the human intestinal tract. *Clin Infect Dis.* **25** Suppl 2,S121-2 (1997).
- 10) Strong H. A., Renwick A. G., George C. F., Liu Y. F., Hill M. J. The reduction of sulphinpyrazone and sulindac by intestinal bacteria. *Xenobiotica.* **17**, 685-96 (1987).
- 11) Strong H. A., Warner N. J., Renwick A. G., George C. F. Sulindac metabolism: the importance of an intact colon. *Clin Pharmacol Ther.* **38**, 387-93 (1985).
- 12) Sousa T., Paterson R., Moore V., Carlsson A., Abrahamsson B., Basit A. W. The gastrointestinal microbiota as a site for the biotransformation of drugs. *Int J Pharm.* **363**,1-25 (2008).
