# Supplementary material for: Xenobiotic Metabolism and Gut Microbiomes
Source: PubMed Central journal article supplement (PMC5047465; doi:10.1371/journal.pone.0163099), 2016-10-03
Supplement: pone.0163099.s031.pdf [file pone.0163099.s031.pdf]

| EC/KO      | Pathways                                                                                                                                                                                                                                                              |
|------------|-----------------------------------------------------------------------------------------------------------------------------------------------------------------------------------------------------------------------------------------------------------------------|
| 1.1.1.-    | Benzoate Degradation Bisphenol Degradation Chloroalkane and Chloroalkene Degradation Furfural Degradation Nitrotoluene Degradation                                                                                                                                    |
| 1.1.1.1    | Chloroalkane and Chloroalkene Degradation Felbamate Cyclophosphamide and Ifosfamide Degradation Naphthalene Degradation                                                                                                                                               |
| 1.1.1.1.   | Metabolism of Xenobiotics- CYP450                                                                                                                                                                                                                                     |
| 1.1.1.145  | Steroid Degradation                                                                                                                                                                                                                                                   |
| 1.1.1.146  | Metabolism of Xenobiotics- CYP450                                                                                                                                                                                                                                     |
| 1.1.1.157  | Benzoate Degradation                                                                                                                                                                                                                                                  |
| 1.1.1.174  | Caprolactam Degradation                                                                                                                                                                                                                                               |
| 1.1.1.184  | Metabolism of Xenobiotics- CYP450                                                                                                                                                                                                                                     |
| 1.1.1.2    | Caprolactam Degradation                                                                                                                                                                                                                                               |
| 1.1.1.205  | Azathioprine and 6-Mercaptopurine Degradation                                                                                                                                                                                                                         |
| 1.1.1.245  | Caprolactam Degradation                                                                                                                                                                                                                                               |
| 1.1.1.256  | Polycyclic Aromatic Hydrocarbon Degradation                                                                                                                                                                                                                           |
| 1.1.1.257  | Toluene Degradation                                                                                                                                                                                                                                                   |
| 1.1.1.258  | Caprolactam Degradation                                                                                                                                                                                                                                               |
| 1.1.1.259  | Benzoate Degradation                                                                                                                                                                                                                                                  |
| 1.1.1.311  | Ethylbenzene Degradation                                                                                                                                                                                                                                              |
| 1.1.1.312  | Aminobenzoate Degradation Benzoate Degradation                                                                                                                                                                                                                        |
| 1.1.1.35   | Caprolactam Degradation Toluene Degradation                                                                                                                                                                                                                           |
| 1.1.1.368  | Benzoate Degradation                                                                                                                                                                                                                                                  |
| 1.1.1.51   | Steroid Degradation                                                                                                                                                                                                                                                   |
| 1.1.1.90   | Caprolactam Degradation Toluene Degradation Xylene Degradation                                                                                                                                                                                                        |
| 1.1.1.97   | Toluene Degradation                                                                                                                                                                                                                                                   |
| 1.1.2.7    | Chloroalkane and Chloroalkene Degradation                                                                                                                                                                                                                             |
| 1.1.2.8    | Chloroalkane and Chloroalkene Degradation                                                                                                                                                                                                                             |
| 1.1.3.19   | Aminobenzoate Degradation                                                                                                                                                                                                                                             |
| 1.1.3.38   | Aminobenzoate Degradation                                                                                                                                                                                                                                             |
| 1.1.3.6    | Steroid Degradation                                                                                                                                                                                                                                                   |
| 1.1.99.31  | Aminobenzoate Degradation                                                                                                                                                                                                                                             |
| 1.12.99.6  | Nitrotoluene Degradation                                                                                                                                                                                                                                              |
| 1.13.11.-  | Aminobenzoate Degradation Benzoate Degradation Chlorocyclohexane and Chlorobenzene Degradation DDT Degradation Dioxin Degradation Ethylbenzene Degradation Naphthalene Degradation Polycyclic Aromatic Hydrocarbon Degradation Toluene Degradation Xylene Degradation |
| 1.13.11.1  | Benzoate Degradation Chlorocyclohexane and Chlorobenzene Degradation Fluorobenzoate Degradation Toluene Degradation                                                                                                                                                   |
| 1.13.11.13 | Polycyclic Aromatic Hydrocarbon Degradation                                                                                                                                                                                                                           |
| 1.13.11.14 | Benzoate Degradation Xylene Degradation                                                                                                                                                                                                                               |
| 1.13.11.2  | Benzoate Degradation Chlorocyclohexane and Chlorobenzene Degradation Styrene Degradation Xylene Degradation                                                                                                                                                           |
| 1.13.11.25 | Steroid Degradation                                                                                                                                                                                                                                                   |
| 1.13.11.3  | Benzoate Degradation                                                                                                                                                                                                                                                  |
| 1.13.11.37 | Benzoate Degradation Chlorocyclohexane and Chlorobenzene Degradation                                                                                                                                                                                                  |
| 1.13.11.38 | Polycyclic Aromatic Hydrocarbon Degradation                                                                                                                                                                                                                           |
| 1.13.11.39 | Chlorocyclohexane and Chlorobenzene Degradation Dioxin Degradation                                                                                                                                                                                                    |
| 1.13.11.41 | Bisphenol Degradation                                                                                                                                                                                                                                                 |
| 1.13.11.5  | Styrene Degradation                                                                                                                                                                                                                                                   |

|             |                                                                                                                                                                                                                                                                                                          |
|-------------|----------------------------------------------------------------------------------------------------------------------------------------------------------------------------------------------------------------------------------------------------------------------------------------------------------|
| 1.13.11.56  | Naphthalene Degradation                                                                                                                                                                                                                                                                                  |
| 1.13.11.57  | Aminobenzoate Degradation                                                                                                                                                                                                                                                                                |
| 1.13.11.66  | Chlorocyclohexane and Chlorobenzene Degradation                                                                                                                                                                                                                                                          |
| 1.13.11.74  | Aminobenzoate Degradation                                                                                                                                                                                                                                                                                |
| 1.13.11.8   | Aminobenzoate Degradation Benzoate Degradation Polycyclic Aromatic Hydrocarbon Degradation                                                                                                                                                                                                               |
| 1.13.12.-   | Chloroalkane and Chloroalkene Degradation Nitrotoluene Degradation                                                                                                                                                                                                                                       |
| 1.14.11.-   | Chlorocyclohexane and Chlorobenzene Degradation                                                                                                                                                                                                                                                          |
| 1.14.12.-   | Aminobenzoate Degradation Chlorocyclohexane and Chlorobenzene Degradation Dioxin Degradation Ethylbenzene Degradation Fluorobenzoate Degradation Naphthalene Degradation Nitrotoluene Degradation Polycyclic Aromatic Hydrocarbon Degradation Styrene Degradation Toluene Degradation Xylene Degradation |
| 1.14.12.1   | Aminobenzoate Degradation                                                                                                                                                                                                                                                                                |
| 1.14.12.10  | Benzoate Degradation Fluorobenzoate Degradation                                                                                                                                                                                                                                                          |
| 1.14.12.11  | Chloroalkane and Chloroalkene Degradation Toluene Degradation                                                                                                                                                                                                                                            |
| 1.14.12.12  | Ethylbenzene Degradation Naphthalene Degradation Polycyclic Aromatic Hydrocarbon Degradation                                                                                                                                                                                                             |
| 1.14.12.13  | Fluorobenzoate Degradation                                                                                                                                                                                                                                                                               |
| 1.14.12.14  | Benzoate Degradation Toluene Degradation                                                                                                                                                                                                                                                                 |
| 1.14.12.15  | Polycyclic Aromatic Hydrocarbon Degradation                                                                                                                                                                                                                                                              |
| 1.14.12.18  | Dioxin Degradation                                                                                                                                                                                                                                                                                       |
| 1.14.12.22  | Dioxin Degradation                                                                                                                                                                                                                                                                                       |
| 1.14.12.3   | Benzoate Degradation Chlorocyclohexane and Chlorobenzene Degradation                                                                                                                                                                                                                                     |
| 1.14.12.7   | Polycyclic Aromatic Hydrocarbon Degradation                                                                                                                                                                                                                                                              |
| 1.14.12.8   | Toluene Degradation                                                                                                                                                                                                                                                                                      |
| 1.14.13.-   | Aminobenzoate Degradation Benzoate Degradation Bisphenol Degradation Chloroalkane and Chloroalkene Degradation Chlorocyclohexane and Chlorobenzene Degradation Naphthalene Degradation Polycyclic Aromatic Hydrocarbon Degradation Styrene Degradation Toluene Degradation Xylene Degradation            |
| 1.14.13.1   | Dioxin Degradation Naphthalene Degradation Polycyclic Aromatic Hydrocarbon Degradation                                                                                                                                                                                                                   |
| 1.14.13.12  | Aminobenzoate Degradation Benzoate Degradation                                                                                                                                                                                                                                                           |
| 1.14.13.141 | Steroid Degradation                                                                                                                                                                                                                                                                                      |
| 1.14.13.142 | Steroid Degradation                                                                                                                                                                                                                                                                                      |
| 1.14.13.167 | Aminobenzoate Degradation                                                                                                                                                                                                                                                                                |
| 1.14.13.172 | Naphthalene Degradation                                                                                                                                                                                                                                                                                  |
| 1.14.13.2   | Benzoate Degradation                                                                                                                                                                                                                                                                                     |
| 1.14.13.20  | Chlorocyclohexane and Chlorobenzene Degradation                                                                                                                                                                                                                                                          |
| 1.14.13.22  | Caprolactam Degradation                                                                                                                                                                                                                                                                                  |
| 1.14.13.23  | Benzoate Degradation Polycyclic Aromatic Hydrocarbon Degradation                                                                                                                                                                                                                                         |
| 1.14.13.24  | Benzoate Degradation                                                                                                                                                                                                                                                                                     |
| 1.14.13.27  | Aminobenzoate Degradation                                                                                                                                                                                                                                                                                |
| 1.14.13.29  | Aminobenzoate Degradation                                                                                                                                                                                                                                                                                |
| 1.14.13.33  | Benzoate Degradation                                                                                                                                                                                                                                                                                     |
| 1.14.13.35  | Aminobenzoate Degradation                                                                                                                                                                                                                                                                                |
| 1.14.13.40  | Aminobenzoate Degradation                                                                                                                                                                                                                                                                                |
| 1.14.13.50  | Chlorocyclohexane and Chlorobenzene Degradation Fluorobenzoate Degradation                                                                                                                                                                                                                               |
| 1.14.13.63  | Styrene Degradation                                                                                                                                                                                                                                                                                      |
| 1.14.13.64  | Benzoate Degradation                                                                                                                                                                                                                                                                                     |
| 1.14.13.69  | Chloroalkane and Chloroalkene Degradation                                                                                                                                                                                                                                                                |

|            |                                                                                                                                                                |
|------------|----------------------------------------------------------------------------------------------------------------------------------------------------------------|
| 1.14.13.7  | Aminobenzoate Degradation Chlorocyclohexane and Chlorobenzene Degradation Toluene Degradation                                                                  |
| 1.14.13.8  | Tamoxifen Degradation                                                                                                                                          |
| 1.14.13.82 | Aminobenzoate Degradation                                                                                                                                      |
| 1.14.13.84 | Bisphenol Degradation                                                                                                                                          |
| 1.14.14.1  | Aminobenzoate Degradation Metabolism of Xenobiotics- CYP450                                                                                                    |
| 1.14.14.11 | Styrene Degradation                                                                                                                                            |
| 1.14.14.12 | Steroid Degradation                                                                                                                                            |
| 1.14.15.-  | Atrazine Degradation Caprolactam Degradation                                                                                                                   |
| 1.14.16.6  | Aminobenzoate Degradation                                                                                                                                      |
| 1.14.99.-  | DDT Degradation Naphthalene Degradation                                                                                                                        |
| 1.14.99.15 | Benzoate Degradation                                                                                                                                           |
| 1.14.99.23 | Benzoate Degradation                                                                                                                                           |
| 1.17.3.2   | Azathioprine and 6-Mercaptopurine Degradation                                                                                                                  |
| 1.17.99.1  | Toluene Degradation                                                                                                                                            |
| 1.17.99.2  | Ethylbenzene Degradation                                                                                                                                       |
| 1.18.6.1   | Chloroalkane and Chloroalkene Degradation                                                                                                                      |
| 1.2.1.-    | Naphthalene Degradation Polycyclic Aromatic Hydrocarbon Degradation                                                                                            |
| 1.2.1.10   | Benzoate Degradation Dioxin Degradation Xylene Degradation                                                                                                     |
| 1.2.1.28   | Aminobenzoate Degradation Toluene Degradation Xylene Degradation                                                                                               |
| 1.2.1.29   | Xylene Degradation                                                                                                                                             |
| 1.2.1.3    | Chloroalkane and Chloroalkene Degradation                                                                                                                      |
| 1.2.1.39   | Styrene Degradation                                                                                                                                            |
| 1.2.1.4    | Caprolactam Degradation                                                                                                                                        |
| 1.2.1.46   | Chloroalkane and Chloroalkene Degradation                                                                                                                      |
| 1.2.1.5    | Felbamate Cyclophosphamide and Ifosfamide Degradation Metabolism of Xenobiotics- CYP450                                                                        |
| 1.2.1.61   | Chlorocyclohexane and Chlorobenzene Degradation                                                                                                                |
| 1.2.1.62   | Toluene Degradation                                                                                                                                            |
| 1.2.1.63   | Caprolactam Degradation                                                                                                                                        |
| 1.2.1.64   | Aminobenzoate Degradation Toluene Degradation                                                                                                                  |
| 1.2.1.65   | Naphthalene Degradation                                                                                                                                        |
| 1.2.1.67   | Aminobenzoate Degradation                                                                                                                                      |
| 1.2.1.7    | Aminobenzoate Degradation Toluene Degradation Xylene Degradation                                                                                               |
| 1.2.1.78   | Polycyclic Aromatic Hydrocarbon Degradation                                                                                                                    |
| 1.2.1.85   | Benzoate Degradation Xylene Degradation                                                                                                                        |
| 1.2.3.-    | Naphthalene Degradation                                                                                                                                        |
| 1.2.3.1    | Citalopram Degradation                                                                                                                                         |
| 1.2.7.1    | Nitrotoluene Degradation                                                                                                                                       |
| 1.2.99.2   | Nitrotoluene Degradation                                                                                                                                       |
| 1.2.99.4   | Chloroalkane and Chloroalkene Degradation                                                                                                                      |
| 1.3.1.     | Xylene Degradation                                                                                                                                             |
| 1.3.1.-    | Chlorocyclohexane and Chlorobenzene Degradation DDT Degradation Fluorobenzoate Degradation <br>Polycyclic Aromatic Hydrocarbon Degradation Toluene Degradation |
| 1.3.1.19   | Benzoate Degradation Chlorocyclohexane and Chlorobenzene Degradation Polycyclic Aromatic<br>Hydrocarbon Degradation Styrene Degradation Toluene Degradation    |
| 1.3.1.2    | Fluorouracil Degradation                                                                                                                                       |
| 1.3.1.20   | Metabolism of Xenobiotics- CYP450                                                                                                                              |

|           |                                                                                                                                 |
|-----------|---------------------------------------------------------------------------------------------------------------------------------|
| 1.3.1.25  | Benzoate Degradation Fluorobenzoate Degradation                                                                                 |
| 1.3.1.29  | Naphthalene Degradation Polycyclic Aromatic Hydrocarbon Degradation                                                             |
| 1.3.1.32  | Benzoate Degradation Chlorocyclohexane and Chlorobenzene Degradation Fluorobenzoate Degradation Toluene Degradation             |
| 1.3.1.49  | Polycyclic Aromatic Hydrocarbon Degradation                                                                                     |
| 1.3.1.53  | Polycyclic Aromatic Hydrocarbon Degradation                                                                                     |
| 1.3.1.56  | Dioxin Degradation                                                                                                              |
| 1.3.1.57  | Aminobenzoate Degradation                                                                                                       |
| 1.3.1.58  | Xylene Degradation                                                                                                              |
| 1.3.1.62  | Benzoate Degradation                                                                                                            |
| 1.3.1.63  | Fluorobenzoate Degradation                                                                                                      |
| 1.3.1.64  | Polycyclic Aromatic Hydrocarbon Degradation                                                                                     |
| 1.3.1.66  | Ethylbenzene Degradation                                                                                                        |
| 1.3.1.67  | Xylene Degradation                                                                                                              |
| 1.3.1.68  | Xylene Degradation                                                                                                              |
| 1.3.7.8   | Benzoate Degradation                                                                                                            |
| 1.3.7.9   | Aminobenzoate Degradation Benzoate Degradation                                                                                  |
| 1.3.8.3   | Toluene Degradation                                                                                                             |
| 1.3.99.-  | Benzoate Degradation Caprolactam Degradation Naphthalene Degradation                                                            |
| 1.3.99.32 | Benzoate Degradation                                                                                                            |
| 1.3.99.4  | Steroid Degradation                                                                                                             |
| 1.3.99.5  | Steroid Degradation                                                                                                             |
| 1.3.99.8  | Furfural Degradation                                                                                                            |
| 1.4.3.12  | Caprolactam Degradation                                                                                                         |
| 1.4.3.4   | Citalopram Degradation                                                                                                          |
| 1.5.1.37  | Chlorocyclohexane and Chlorobenzene Degradation                                                                                 |
| 1.6.5.-   | Polycyclic Aromatic Hydrocarbon Degradation                                                                                     |
| 1.6.5.6   | Aminobenzoate Degradation                                                                                                       |
| 1.6.5.7   | Aminobenzoate Degradation Chlorocyclohexane and Chlorobenzene Degradation                                                       |
| 1.7.1.-   | Aminobenzoate Degradation Nitrotoluene Degradation                                                                              |
| 1.8.99.3  | Nitrotoluene Degradation                                                                                                        |
| 1.97.1.-  | Bisphenol Degradation Chloroalkane and Chloroalkene Degradation Chlorocyclohexane and Chlorobenzene Degradation DDT Degradation |
| 1.97.1.2  | Aminobenzoate Degradation                                                                                                       |
| 1.97.1.8  | Chloroalkane and Chloroalkene Degradation                                                                                       |
| 2.1.1.-   | Aminobenzoate Degradation Polycyclic Aromatic Hydrocarbon Degradation                                                           |
| 2.1.1.67  | Azathioprine and 6-Mercaptopurine Degradation                                                                                   |
| 2.3.1.-   | Aminobenzoate Degradation Benzoate Degradation Ethylbenzene Degradation Naphthalene Degradation Toluene Degradation             |
| 2.3.1.16  | Benzoate Degradation Ethylbenzene Degradation                                                                                   |
| 2.3.1.174 | Benzoate Degradation                                                                                                            |
| 2.3.1.5   | Isoniazid Degradation Nitrotoluene Degradation                                                                                  |
| 2.3.1.9   | Benzoate Degradation                                                                                                            |
| 2.4.1.17  | Codeine and Morphine Degradation Irinotecan Degradation Metabolism of Xenobiotics- CYP450                                       |
| 2.4.2.10  | Fluorouracil Degradation                                                                                                        |
| 2.4.2.3   | Fluorouracil Degradation                                                                                                        |
| 2.4.2.4   | Fluorouracil Degradation                                                                                                        |

|          |                                                                                                |
|----------|------------------------------------------------------------------------------------------------|
| 2.4.2.8  | Azathioprine and 6-Mercaptopurine Degradation                                                  |
| 2.5.1.-  | Chlorocyclohexane and Chlorobenzene Degradation                                                |
| 2.5.1.18 | Cyclophosphamide and Ifosfamide Degradation Metabolism of Xenobiotics- CYP450                  |
| 2.6.1.-  | Caprolactam Degradation                                                                        |
| 2.7.1.21 | Fluorouracil Degradation                                                                       |
| 2.7.1.48 | Fluorouracil Degradation                                                                       |
| 2.7.4.-  | Azathioprine and 6- Mercaptopurine Degradation                                                 |
| 2.7.9.-  | Aminobenzoate Degradation                                                                      |
| 2.8.2.-  | Polycyclic Aromatic Hydrocarbon Degradation                                                    |
| 2.8.2.14 | Metabolism of Xenobiotics- CYP450                                                              |
| 2.8.3.-  | Naphthalene Degradation                                                                        |
| 2.8.3.1  | Styrene Degradation                                                                            |
| 2.8.3.12 | Styrene Degradation                                                                            |
| 2.8.3.15 | Toluene Degradation                                                                            |
| 2.8.3.6  | Benzoate Degradation                                                                           |
| 2.8.3.8  | Aminobenzoate Degradation                                                                      |
| 3.1.1.-  | Bisphenol Degradation Furfural Degradation Toluene Degradation                                 |
| 3.1.1.1  | Fluorouracil and Irinotecan Degradation                                                        |
| 3.1.1.17 | Caprolactam Degradation                                                                        |
| 3.1.1.2  | Bisphenol Degradation                                                                          |
| 3.1.1.24 | Benzoate Degradation                                                                           |
| 3.1.1.35 | Polycyclic Aromatic Hydrocarbon Degradation                                                    |
| 3.1.1.45 | Chlorocyclohexane and Chlorobenzene Degradation Fluorobenzoate Degradation Toluene Degradation |
| 3.1.1.57 | Aminobenzoate Degradation Benzoate Degradation                                                 |
| 3.1.1.92 | Aminobenzoate Degradation                                                                      |
| 3.1.2.-  | Benzoate Degradation                                                                           |
| 3.1.2.23 | Benzoate Degradation                                                                           |
| 3.1.3.1  | Aminobenzoate Degradation                                                                      |
| 3.1.3.2  | Aminobenzoate Degradation                                                                      |
| 3.1.3.41 | Aminobenzoate Degradation                                                                      |
| 3.1.8.1  | Aminobenzoate Degradation                                                                      |
| 3.10.1.2 | Caprolactam Degradation                                                                        |
| 3.2.1.31 | Irinotecan Degradation                                                                         |
| 3.3.2.-  | Polycyclic Aromatic Hydrocarbon Degradation                                                    |
| 3.3.2.10 | Chloroalkane and Chloroalkene Degradation                                                      |
| 3.3.2.9  | Metabolism of Xenobiotics- CYP450                                                              |
| 3.5.1.-  | Caprolactam Degradation Fluorobenzoate Degradation                                             |
| 3.5.1.4  | Aminobenzoate Degradation Styrene Degradation                                                  |
| 3.5.1.5  | Atrazine Degradation                                                                           |
| 3.5.1.54 | Atrazine Degradation                                                                           |
| 3.5.1.6  | Fluorouracil Degradation                                                                       |
| 3.5.1.84 | Atrazine Degradation                                                                           |
| 3.5.2.-  | Caprolactam Degradation                                                                        |
| 3.5.2.15 | Atrazine Degradation                                                                           |
| 3.5.2.2  | Fluorouracil Degradation                                                                       |
| 3.5.4.-  | Atrazine Degradation                                                                           |

|           |                                                                                                                                                                                          |
|-----------|------------------------------------------------------------------------------------------------------------------------------------------------------------------------------------------|
| 3.5.4.5   | Fluorouracil Degradation                                                                                                                                                                 |
| 3.5.5.1   | Aminobenzoate Degradation Styrene Degradation                                                                                                                                            |
| 3.5.5.6   | Fluorobenzoate Degradation                                                                                                                                                               |
| 3.5.5.7   | Styrene Degradation                                                                                                                                                                      |
| 3.5.99.-  | Atrazine Degradation                                                                                                                                                                     |
| 3.5.99.3  | Atrazine Degradation                                                                                                                                                                     |
| 3.5.99.4  | Atrazine Degradation                                                                                                                                                                     |
| 3.6.1.19  | Azathioprine and 6-Mercaptopurine Degradation                                                                                                                                            |
| 3.6.1.7   | Aminobenzoate Degradation                                                                                                                                                                |
| 3.7.1.-   | Aminobenzoate Degradation Benzoate Degradation DDT Degradation Dioxin Degradation Ethylbenzene Degradation Nitrotoluene Degradation Xylene Degradation                                   |
| 3.7.1.11  | Caprolactam Degradation                                                                                                                                                                  |
| 3.7.1.17  | Steroid Degradation                                                                                                                                                                      |
| 3.7.1.2   | Styrene Degradation                                                                                                                                                                      |
| 3.7.1.8   | Dioxin Degradation                                                                                                                                                                       |
| 3.7.1.9   | Benzoate Degradation Styrene Degradation Xylene Degradation                                                                                                                              |
| 3.8.1.-   | Atrazine Degradation Chloroalkane and Chloroalkene Degradation                                                                                                                           |
| 3.8.1.2   | Chloroalkane and Chloroalkene Degradation Chlorocyclohexane and Chlorobenzene Degradation                                                                                                |
| 3.8.1.3   | Chloroalkane and Chloroalkene Degradation Chlorocyclohexane and Chlorobenzene Degradation                                                                                                |
| 3.8.1.5   | Chloroalkane and Chloroalkene Degradation Chlorocyclohexane and Chlorobenzene Degradation                                                                                                |
| 3.8.1.7   | Fluorobenzoate Degradation                                                                                                                                                               |
| 3.8.1.8   | Atrazine Degradation                                                                                                                                                                     |
| 4.1.1.-   | Benzoate Degradation Chloroalkane and Chloroalkene Degradation DDT Degradation Dioxin Degradation Naphthalene Degradation Polycyclic Aromatic Hydrocarbon Degradation Xylene Degradation |
| 4.1.1.44  | Benzoate Degradation                                                                                                                                                                     |
| 4.1.1.46  | Aminobenzoate Degradation                                                                                                                                                                |
| 4.1.1.55  | Polycyclic Aromatic Hydrocarbon Degradation                                                                                                                                              |
| 4.1.1.59  | Aminobenzoate Degradation                                                                                                                                                                |
| 4.1.1.61  | Aminobenzoate Degradation                                                                                                                                                                |
| 4.1.1.63  | Benzoate Degradation                                                                                                                                                                     |
| 4.1.1.69  | Polycyclic Aromatic Hydrocarbon Degradation                                                                                                                                              |
| 4.1.1.7   | Aminobenzoate Degradation                                                                                                                                                                |
| 4.1.1.70  | Benzoate Degradation                                                                                                                                                                     |
| 4.1.1.77  | Benzoate Degradation Dioxin Degradation Xylene Degradation                                                                                                                               |
| 4.1.2.-   | Polycyclic Aromatic Hydrocarbon Degradation                                                                                                                                              |
| 4.1.2.34  | Polycyclic Aromatic Hydrocarbon Degradation                                                                                                                                              |
| 4.1.2.45  | Naphthalene Degradation                                                                                                                                                                  |
| 4.1.3.-   | Polycyclic Aromatic Hydrocarbon Degradation                                                                                                                                              |
| 4.1.3.17  | Benzoate Degradation                                                                                                                                                                     |
| 4.1.3.39  | Benzoate Degradation Dioxin Degradation Xylene Degradation                                                                                                                               |
| 4.1.99.-  | Naphthalene Degradation                                                                                                                                                                  |
| 4.1.99.11 | Toluene Degradation                                                                                                                                                                      |
| 4.2.1.-   | Benzoate Degradation Bisphenol Degradation Naphthalene Degradation Toluene Degradation                                                                                                   |
| 4.2.1.100 | Benzoate Degradation                                                                                                                                                                     |
| 4.2.1.103 | Caprolactam Degradation                                                                                                                                                                  |
| 4.2.1.112 | Chloroalkane and Chloroalkene Degradation                                                                                                                                                |

|           |                                                                                                                            |
|-----------|----------------------------------------------------------------------------------------------------------------------------|
| 4.2.1.17  | Aminobenzoate Degradation Benzoate Degradation Caprolactam Degradation                                                     |
| 4.2.1.54  | Styrene Degradation                                                                                                        |
| 4.2.1.69  | Atrazine Degradation                                                                                                       |
| 4.2.1.80  | Benzoate Degradation Dioxin Degradation Xylene Degradation                                                                 |
| 4.2.1.83  | Benzoate Degradation                                                                                                       |
| 4.2.1.84  | Aminobenzoate Degradation Fluorobenzoate Degradation Styrene Degradation                                                   |
| 4.5.1.-   | Chlorocyclohexane and Chlorobenzene Degradation DDT Degradation                                                            |
| 4.5.1.1   | DDT Degradation                                                                                                            |
| 4.5.1.3   | Chloroalkane and Chloroalkene Degradation                                                                                  |
| 4.99.1.7  | Styrene Degradation                                                                                                        |
| 5.1.2.-   | Polycyclic Aromatic Hydrocarbon Degradation                                                                                |
| 5.1.2.2   | Aminobenzoate Degradation                                                                                                  |
| 5.2.1.10  | Chlorocyclohexane and Chlorobenzene Degradation                                                                            |
| 5.2.1.2   | Styrene Degradation                                                                                                        |
| 5.3.2.6   | Benzoate Degradation Dioxin Degradation Xylene Degradation                                                                 |
| 5.3.2.8   | Benzoate Degradation                                                                                                       |
| 5.3.3.1   | Steroid Degradation                                                                                                        |
| 5.3.3.4   | Benzoate Degradation                                                                                                       |
| 5.3.99.-  | Naphthalene Degradation                                                                                                    |
| 5.3.99.7  | Styrene Degradation                                                                                                        |
| 5.4.4.1   | Aminobenzoate Degradation                                                                                                  |
| 5.4.4.3   | Aminobenzoate Degradation                                                                                                  |
| 5.4.99.-  | Aminobenzoate Degradation                                                                                                  |
| 5.4.99.14 | Toluene Degradation                                                                                                        |
| 5.5.1.-   | Aminobenzoate Degradation Toluene Degradation                                                                              |
| 5.5.1.1   | Benzoate Degradation Chlorocyclohexane and Chlorobenzene Degradation Fluorobenzoate Degradation Toluene Degradation        |
| 5.5.1.11  | Chlorocyclohexane and Chlorobenzene Degradation                                                                            |
| 5.5.1.2   | Benzoate Degradation                                                                                                       |
| 5.5.1.5   | Benzoate Degradation                                                                                                       |
| 5.5.1.7   | Chlorocyclohexane and Chlorobenzene Degradation Fluorobenzoate Degradation Toluene Degradation                             |
| 5.99.1.4  | Naphthalene Degradation                                                                                                    |
| 6.2.1.-   | Aminobenzoate Degradation Benzoate Degradation Caprolactam Degradation Ethylbenzene Degradation Fluorobenzoate Degradation |
| 6.2.1.25  | Aminobenzoate Degradation Benzoate Degradation                                                                             |
| 6.2.1.27  | Aminobenzoate Degradation Benzoate Degradation                                                                             |
| 6.2.1.31  | Furfural Degradation                                                                                                       |
| 6.2.1.32  | Aminobenzoate Degradation                                                                                                  |
| 6.2.1.33  | Fluorobenzoate Degradation                                                                                                 |
| 6.3.5.2   | Azathioprine and 6-Mercaptopurine Degradation                                                                              |
| 6.4.1.-   | Aminobenzoate Degradation                                                                                                  |
| 6.4.1.8   | Ethylbenzene Degradation                                                                                                   |
| K00002    | Caprolactam Degradation                                                                                                    |
| K00022    | Caprolactam Degradation                                                                                                    |
| K00055    | Toluene Degradation Xylene Degradation   Caprolactam Degradation                                                           |
| K00074    | Benzoate Degradation                                                                                                       |

|        |                                                                                                                                 |
|--------|---------------------------------------------------------------------------------------------------------------------------------|
| K00079 | Metabolism of Xenobiotics- CYP450                                                                                               |
| K00088 | Azathioprine and 6-Mercaptopurine Degradation                                                                                   |
| K00100 | Bisphenol Degradation Chloroalkane and Chloroalkene Degradation                                                                 |
| K00106 | Azathioprine and 6-Mercaptopurine Degradation                                                                                   |
| K00114 | Chloroalkane and Chloroalkene Degradation                                                                                       |
| K00128 | Chloroalkane and Chloroalkene Degradation                                                                                       |
| K00129 | Felbamate Cyclophosphamide and Ifosfamide Degradation Metabolism of Xenobiotics- CYP450                                         |
| K00132 | Benzoate Degradation Dioxin Degradation Xylene Degradation                                                                      |
| K00141 | Aminobenzoate Degradation Toluene Degradation Xylene Degradation                                                                |
| K00146 | Styrene Degradation                                                                                                             |
| K00148 | Chloroalkane and Chloroalkene Degradation                                                                                       |
| K00152 | Naphthalene Degradation                                                                                                         |
| K00155 | Naphthalene Degradation                                                                                                         |
| K00157 | Citalopram Degradation                                                                                                          |
| K00169 | Nitrotoluene Degradation                                                                                                        |
| K00207 | Fluorouracil Degradation                                                                                                        |
| K00212 | Metabolism of Xenobiotics- CYP450                                                                                               |
| K00217 | Benzoate Degradation Chlorocyclohexane and Chlorobenzene Degradation Fluorobenzoate Degradation Toluene Degradation             |
| K00224 | Polycyclic Aromatic Hydrocarbon Degradation Chlorocyclohexane and Chlorobenzene Degradation DDT Degradation                     |
| K00274 | Citalopram Degradation                                                                                                          |
| K00446 | Benzoate Degradation Chlorocyclohexane and Chlorobenzene Degradation Styrene Degradation Xylene Degradation                     |
| K00448 | Polycyclic Aromatic Hydrocarbon Degradation Benzoate Degradation                                                                |
| K00451 | Styrene Degradation                                                                                                             |
| K00462 | Chlorocyclohexane and Chlorobenzene Degradation Dioxin Degradation                                                              |
| K00480 | Dioxin Degradation Naphthalene Degradation Polycyclic Aromatic Hydrocarbon Degradation                                          |
| K00481 | Benzoate Degradation                                                                                                            |
| K00485 | Tamoxifen Degradation                                                                                                           |
| K00492 | Bisphenol Degradation Naphthalene Degradation Polycyclic Aromatic Hydrocarbon Degradation                                       |
| K00493 | Aminobenzoate Degradation                                                                                                       |
| K00531 | Chloroalkane and Chloroalkene Degradation                                                                                       |
| K00539 | Bisphenol Degradation Chloroalkane and Chloroalkene Degradation Chlorocyclohexane and Chlorobenzene Degradation DDT Degradation |
| K00569 | Azathioprine and 6-Mercaptopurine Degradation                                                                                   |
| K00599 | Polycyclic Aromatic Hydrocarbon Degradation                                                                                     |
| K00622 | Isoniazid Degradation Nitrotoluene Degradation                                                                                  |
| K00626 | Benzoate Degradation                                                                                                            |
| K00632 | Benzoate Degradation Ethylbenzene Degradation                                                                                   |
| K00680 | Aminobenzoate Degradation Benzoate Degradation Ethylbenzene Degradation                                                         |
| K00699 | Codeine and Morphine Degradation Irinotecan Degradation                                                                         |
| K00757 | Fluorouracil Degradation                                                                                                        |
| K00758 | Fluorouracil Degradation                                                                                                        |
| K00760 | Azathioprine and 6-Mercaptopurine Degradation                                                                                   |
| K00799 | Cyclophosphamide and Ifosfamide Degradation Metabolism of Xenobiotics- CYP450                                                   |
| K00857 | Fluorouracil Degradation                                                                                                        |



|        |                                                                                                |
|--------|------------------------------------------------------------------------------------------------|
| K00876 | Fluorouracil Degradation                                                                       |
| K01026 | Styrene Degradation                                                                            |
| K01031 | Benzoate Degradation                                                                           |
| K01034 | Aminobenzoate Degradation                                                                      |
| K01039 | Styrene Degradation                                                                            |
| K01041 | Naphthalene Degradation                                                                        |
| K01044 | Fluorouracil and Irinotecan Degradation                                                        |
| K01045 | Bisphenol Degradation Aminobenzoate Degradation                                                |
| K01053 | Caprolactam Degradation                                                                        |
| K01055 | Benzoate Degradation                                                                           |
|        |                                                                                                |
| K01061 | Chlorocyclohexane and Chlorobenzene Degradation Fluorobenzoate Degradation Toluene Degradation |
| K01066 | Bisphenol Degradation                                                                          |
| K01075 | Benzoate Degradation                                                                           |
| K01077 | Aminobenzoate Degradation                                                                      |
| K01078 | Aminobenzoate Degradation                                                                      |
| K01101 | Aminobenzoate Degradation                                                                      |
| K01195 | Irinotecan Degradation                                                                         |
| K01253 | Metabolism of Xenobiotics- CYP450                                                              |
| K01426 | Aminobenzoate Degradation Styrene Degradation                                                  |
| K01428 | Atrazine Degradation                                                                           |
| K01431 | Fluorouracil Degradation                                                                       |
| K01457 | Atrazine Degradation                                                                           |
| K01464 | Fluorouracil Degradation                                                                       |
| K01489 | Fluorouracil Degradation                                                                       |
| K01500 | Atrazine Degradation                                                                           |
| K01501 | Aminobenzoate Degradation Styrene Degradation                                                  |
| K01502 | Styrene Degradation                                                                            |
| K01512 | Aminobenzoate Degradation                                                                      |
| K01519 | Azathioprine and 6-Mercaptopurine Degradation                                                  |
| K01555 | Styrene Degradation                                                                            |
| K01560 | Chlorocyclohexane and Chlorobenzene Degradation   Chloroalkane and Chloroalkene Degradation    |
| K01561 | Chloroalkane and Chloroalkene Degradation Chlorocyclohexane and Chlorobenzene Degradation      |
| K01563 | Chloroalkane and Chloroalkene Degradation Chlorocyclohexane and Chlorobenzene Degradation      |
| K01564 | Atrazine Degradation Chloroalkane and Chloroalkene Degradation                                 |
| K01576 | Aminobenzoate Degradation                                                                      |
| K01607 | Benzoate Degradation                                                                           |
| K01612 | Aminobenzoate Degradation                                                                      |
| K01615 | Benzoate Degradation                                                                           |
| K01617 | Benzoate Degradation Dioxin Degradation Xylene Degradation                                     |
| K01666 | Benzoate Degradation Dioxin Degradation Xylene Degradation                                     |
| K01670 | Naphthalene Degradation                                                                        |
| K01692 | Benzoate Degradation Caprolactam Degradation   Aminobenzoate Degradation                       |
| K01721 | Aminobenzoate Degradation Fluorobenzoate Degradation Styrene Degradation                       |
| K01726 | Benzoate Degradation Bisphenol Degradation Naphthalene Degradation                             |
| K01781 | Aminobenzoate Degradation                                                                      |
| K01800 | Styrene Degradation                                                                            |

|        |                                                                                                                                         |
|--------|-----------------------------------------------------------------------------------------------------------------------------------------|
| K01821 | Benzoate Degradation Dioxin Degradation Xylene Degradation                                                                              |
| K01822 | Steroid Degradation                                                                                                                     |
| K01856 | Benzoate Degradation Chlorocyclohexane and Chlorobenzene Degradation Fluorobenzoate Degradation Toluene Degradation                     |
| K01857 | Benzoate Degradation                                                                                                                    |
| K01860 | Chlorocyclohexane and Chlorobenzene Degradation Fluorobenzoate Degradation Toluene Degradation                                          |
| K01913 | Aminobenzoate Degradation Caprolactam Degradation                                                                                       |
| K01951 | Azathioprine and 6-Mercaptopurine Degradation                                                                                           |
| K02554 | Benzoate Degradation Dioxin Degradation Xylene Degradation                                                                              |
| K03268 | Chloroalkane and Chloroalkene Degradation Toluene Degradation Benzoate Degradation Chlorocyclohexane and Chlorobenzene Degradation      |
| K03333 | Steroid Degradation                                                                                                                     |
| K03379 | Caprolactam Degradation                                                                                                                 |
| K03380 | Chlorocyclohexane and Chlorobenzene Degradation  Aminobenzoate Degradation Toluene Degradation                                          |
| K03381 | Benzoate Degradation Chlorocyclohexane and Chlorobenzene Degradation Fluorobenzoate Degradation Toluene Degradation                     |
| K03382 | Atrazine Degradation                                                                                                                    |
| K03383 | Atrazine Degradation                                                                                                                    |
| K03384 | Chlorocyclohexane and Chlorobenzene Degradation Naphthalene Degradation Polycyclic Aromatic Hydrocarbon Degradation Toluene Degradation |
| K03391 | Chlorocyclohexane and Chlorobenzene Degradation Fluorobenzoate Degradation                                                              |
| K03464 | Benzoate Degradation                                                                                                                    |
| K03518 | Nitrotoluene Degradation                                                                                                                |
| K03862 | Aminobenzoate Degradation                                                                                                               |
| K04098 | Benzoate Degradation Chlorocyclohexane and Chlorobenzene Degradation                                                                    |
| K04099 | Aminobenzoate Degradation                                                                                                               |
| K04100 | Aminobenzoate Degradation Benzoate Degradation Polycyclic Aromatic Hydrocarbon Degradation                                              |
| K04102 | Polycyclic Aromatic Hydrocarbon Degradation                                                                                             |
| K04105 | Aminobenzoate Degradation Benzoate Degradation                                                                                          |
| K04107 | Benzoate Degradation   Aminobenzoate Degradation                                                                                        |
| K04110 | Aminobenzoate Degradation Benzoate Degradation                                                                                          |
| K04112 | Benzoate Degradation                                                                                                                    |
| K04116 | Benzoate Degradation                                                                                                                    |
| K04117 | Benzoate Degradation                                                                                                                    |
| K04118 | Benzoate Degradation                                                                                                                    |
| K05296 | Steroid Degradation                                                                                                                     |
| K05394 | Atrazine Degradation                                                                                                                    |
| K05549 | Xylene Degradation Benzoate Degradation Fluorobenzoate Degradation                                                                      |
| K05599 | Aminobenzoate Degradation                                                                                                               |
| K05783 | Xylene Degradation Benzoate Degradation Fluorobenzoate Degradation                                                                      |
| K05797 | Toluene Degradation                                                                                                                     |
| K05898 | Steroid Degradation                                                                                                                     |
| K05913 | Bisphenol Degradation                                                                                                                   |
| K06035 | Atrazine Degradation                                                                                                                    |
| K06281 | Nitrotoluene Degradation                                                                                                                |

|        |                                                             |
|--------|-------------------------------------------------------------|
| K06446 | Caprolactam Degradation                                     |
| K06912 | Chlorocyclohexane and Chlorobenzene Degradation             |
| K07408 | Metabolism of Xenobiotics- CYP450                           |
| K07535 | Benzoate Degradation                                        |
| K07536 | Benzoate Degradation                                        |
| K07537 | Benzoate Degradation                                        |
| K07538 | Benzoate Degradation                                        |
| K07540 | Toluene Degradation                                         |
| K07543 | Toluene Degradation                                         |
| K07545 | Toluene Degradation                                         |
| K07546 | Toluene Degradation                                         |
| K07547 | Toluene Degradation                                         |
| K07549 | Toluene Degradation                                         |
| K07823 | Benzoate Degradation                                        |
| K07824 | Aminobenzoate Degradation Benzoate Degradation              |
| K08295 | Aminobenzoate Degradation                                   |
| K08686 | Fluorobenzoate Degradation                                  |
| K08689 | Dioxin Degradation                                          |
| K08690 | Dioxin Degradation                                          |
| K08710 | Atrazine Degradation                                        |
| K08726 | Chloroalkane and Chloroalkene Degradation                   |
| K09461 | Aminobenzoate Degradation                                   |
| K10215 | Aminobenzoate Degradation                                   |
| K10216 | Benzoate Degradation Styrene Degradation Xylene Degradation |
| K10217 | Benzoate Degradation Xylene Degradation                     |
| K10218 | Benzoate Degradation                                        |
| K10219 | Aminobenzoate Degradation Benzoate Degradation              |
| K10220 | Benzoate Degradation                                        |
| K10221 | Aminobenzoate Degradation Benzoate Degradation              |
| K10222 | Dioxin Degradation                                          |
| K10437 | Styrene Degradation                                         |
| K10438 | Styrene Degradation                                         |
| K10566 | Styrene Degradation                                         |
| K10616 | Xylene Degradation                                          |
| K10617 | Xylene Degradation                                          |
| K10618 | Xylene Degradation                                          |
| K10619 | Xylene Degradation                                          |
| K10620 | Xylene Degradation                                          |
| K10621 | Xylene Degradation Benzoate Degradation                     |
| K10622 | Benzoate Degradation Xylene Degradation                     |
| K10623 | Xylene Degradation                                          |
| K10676 | Chlorocyclohexane and Chlorobenzene Degradation             |
| K10700 | Ethylbenzene Degradation                                    |
| K10701 | Ethylbenzene Degradation                                    |
| K10702 | Xylene Degradation                                          |
| K11180 | Nitrotoluene Degradation                                    |
| K11822 | Metabolism of Xenobiotics- CYP450                           |

|        |                                                                                              |
|--------|----------------------------------------------------------------------------------------------|
| K11946 | Polycyclic Aromatic Hydrocarbon Degradation                                                  |
| K11947 | Polycyclic Aromatic Hydrocarbon Degradation                                                  |
| K11948 | Polycyclic Aromatic Hydrocarbon Degradation                                                  |
| K11949 | Polycyclic Aromatic Hydrocarbon Degradation                                                  |
| K13421 | Fluorouracil Degradation                                                                     |
| K13951 | Felbamate Cyclophosphamide and Ifosfamide Degradation   Metabolism of Xenobiotics- CYP450    |
| K13953 | Chloroalkane and Chloroalkene Degradation Naphthalene Degradation                            |
| K14028 | Chloroalkane and Chloroalkene Degradation                                                    |
| K14333 | Aminobenzoate Degradation                                                                    |
| K14334 | Benzoate Degradation                                                                         |
| K14417 | Fluorobenzoate Degradation                                                                   |
| K14418 | Fluorobenzoate Degradation                                                                   |
| K14419 | Chloroalkane and Chloroalkene Degradation                                                    |
| K14421 | Chloroalkane and Chloroalkene Degradation                                                    |
| K14422 | Chloroalkane and Chloroalkene Degradation                                                    |
| K14481 | Styrene Degradation                                                                          |
| K14519 | Caprolactam Degradation                                                                      |
| K14520 | Bisphenol Degradation                                                                        |
| K14542 | Atrazine Degradation                                                                         |
| K14579 | Ethylbenzene Degradation Naphthalene Degradation Polycyclic Aromatic Hydrocarbon Degradation |
| K14582 | Naphthalene Degradation Polycyclic Aromatic Hydrocarbon Degradation                          |
| K14583 | Naphthalene Degradation                                                                      |
| K14584 | Naphthalene Degradation                                                                      |
| K14585 | Naphthalene Degradation                                                                      |
| K14586 | Naphthalene Degradation                                                                      |
| K14599 | Dioxin Degradation Polycyclic Aromatic Hydrocarbon Degradation                               |
| K14601 | Polycyclic Aromatic Hydrocarbon Degradation                                                  |
| K14602 | Polycyclic Aromatic Hydrocarbon Degradation                                                  |
| K14604 | Polycyclic Aromatic Hydrocarbon Degradation                                                  |
| K14746 | Ethylbenzene Degradation                                                                     |
| K14747 | Ethylbenzene Degradation                                                                     |
| K14748 | Ethylbenzene Degradation                                                                     |
| K14751 | Ethylbenzene Degradation                                                                     |
| K15054 | Aminobenzoate Degradation                                                                    |
| K15055 | Aminobenzoate Degradation                                                                    |
| K15056 | Aminobenzoate Degradation                                                                    |
| K15057 | Aminobenzoate Degradation                                                                    |
| K15058 | Aminobenzoate Degradation                                                                    |
| K15060 | Aminobenzoate Degradation                                                                    |
| K15061 | Aminobenzoate Degradation                                                                    |
| K15062 | Aminobenzoate Degradation                                                                    |
| K15063 | Aminobenzoate Degradation                                                                    |
| K15064 | Aminobenzoate Degradation                                                                    |
| K15065 | Aminobenzoate Degradation                                                                    |
| K15066 | Aminobenzoate Degradation                                                                    |
| K15236 | Chlorocyclohexane and Chlorobenzene Degradation                                              |
| K15237 | Chlorocyclohexane and Chlorobenzene Degradation                                              |

|        |                                                                                                                                                            |
|--------|------------------------------------------------------------------------------------------------------------------------------------------------------------|
| K15238 | Chlorocyclohexane and Chlorobenzene Degradation                                                                                                            |
| K15239 | Chlorocyclohexane and Chlorobenzene Degradation                                                                                                            |
| K15240 | Chlorocyclohexane and Chlorobenzene Degradation                                                                                                            |
| K15241 | Chlorocyclohexane and Chlorobenzene Degradation                                                                                                            |
| K15242 | Chlorocyclohexane and Chlorobenzene Degradation                                                                                                            |
| K15243 | Chlorocyclohexane and Chlorobenzene Degradation                                                                                                            |
| K15244 | Chlorocyclohexane and Chlorobenzene Degradation                                                                                                            |
| K15245 | Chlorocyclohexane and Chlorobenzene Degradation                                                                                                            |
| K15246 | Chlorocyclohexane and Chlorobenzene Degradation                                                                                                            |
| K15247 | Chlorocyclohexane and Chlorobenzene Degradation                                                                                                            |
| K15248 | Chlorocyclohexane and Chlorobenzene Degradation                                                                                                            |
| K15252 | Chlorocyclohexane and Chlorobenzene Degradation                                                                                                            |
| K15253 | Chlorocyclohexane and Chlorobenzene Degradation                                                                                                            |
| K15569 | Naphthalene Degradation                                                                                                                                    |
| K15571 | Naphthalene Degradation                                                                                                                                    |
| K15572 | Naphthalene Degradation                                                                                                                                    |
| K15573 | Naphthalene Degradation                                                                                                                                    |
| K15574 | Naphthalene Degradation                                                                                                                                    |
| K15680 | Metabolism of Xenobiotics- CYP450                                                                                                                          |
| K15749 | Dioxin Degradation                                                                                                                                         |
| K15751 | Dioxin Degradation                                                                                                                                         |
| K15754 | Dioxin Degradation                                                                                                                                         |
| K15756 | Dioxin Degradation                                                                                                                                         |
| K15757 | Toluene Degradation Xylene Degradation                                                                                                                     |
| K15766 | Toluene Degradation                                                                                                                                        |
| K15768 | Toluene Degradation                                                                                                                                        |
| K15981 | Steroid Degradation                                                                                                                                        |
| K15982 | Steroid Degradation                                                                                                                                        |
| K16045 | Steroid Degradation                                                                                                                                        |
| K16047 | Steroid Degradation                                                                                                                                        |
| K16049 | Steroid Degradation                                                                                                                                        |
| K16050 | Steroid Degradation                                                                                                                                        |
| K16051 | Steroid Degradation                                                                                                                                        |
| K16173 | Benzoate Degradation                                                                                                                                       |
| K16249 | Benzoate Degradation Chlorocyclohexane and Chlorobenzene Degradation Toluene Degradation                                                                   |
| K16269 | Benzoate Degradation Chlorocyclohexane and Chlorobenzene Degradation Styrene Degradation Toluene Degradation   Polycyclic Aromatic Hydrocarbon Degradation |
| K16270 | Xylene Degradation                                                                                                                                         |
| K16514 | Benzoate Degradation                                                                                                                                       |
| K16873 | Furfural Degradation                                                                                                                                       |
| K16874 | Furfural Degradation                                                                                                                                       |
| K16876 | Furfural Degradation                                                                                                                                       |
| K16877 | Furfural Degradation                                                                                                                                       |
| K16880 | Furfural Degradation                                                                                                                                       |
| K17067 | Chloroalkane and Chloroalkene Degradation                                                                                                                  |
| K17070 | Chloroalkane and Chloroalkene Degradation                                                                                                                  |
| K18067 | Polycyclic Aromatic Hydrocarbon Degradation                                                                                                                |

|        |                                             |
|--------|---------------------------------------------|
| K18068 | Polycyclic Aromatic Hydrocarbon Degradation |
| K18074 | Polycyclic Aromatic Hydrocarbon Degradation |
| K18076 | Polycyclic Aromatic Hydrocarbon Degradation |
| K18092 | Ethylbenzene Degradation                    |
| K18199 | Caprolactam Degradation                     |
| K18242 | Naphthalene Degradation                     |
| K18256 | Polycyclic Aromatic Hydrocarbon Degradation |
| K18257 | Polycyclic Aromatic Hydrocarbon Degradation |
| K18275 | Polycyclic Aromatic Hydrocarbon Degradation |
| K18312 | Styrene Degradation                         |
