# Supplementary material for: Xenobiotic Metabolism and Gut Microbiomes
Source: PubMed Central journal article supplement (PMC5047465; doi:10.1371/journal.pone.0163099), 2016-10-03
Supplement: pone.0163099.s032.pdf [file pone.0163099.s032.pdf]

| Sample ID | Region   | Age | Age Group |  | Sample ID | Region  | Age | Age Group |  | Sample ID | Region | Age | Age Group |
|-----------|----------|-----|-----------|--|-----------|---------|-----|-----------|--|-----------|--------|-----|-----------|
| AM-AD-10  | American | N/A | N/A       |  | DOF007    | Chinese | 70  | 60_above  |  | DA-AD-40  | Danish | 59  | 50_to_60  |
| AM-AD-11  | American | N/A | N/A       |  | DOF008    | Chinese | 40  | 40_to_50  |  | DA-AD-41  | Danish | 49  | 40_to_50  |
| AM-AD-12  | American | N/A | N/A       |  | DOF009    | Chinese | 68  | 60_above  |  | DA-AD-42  | Danish | 69  | 60_above  |
| AM-AD-13  | American | N/A | N/A       |  | DOF010    | Chinese | 62  | 60_above  |  | DA-AD-43  | Danish | 64  | 60_above  |
| AM-AD-14  | American | N/A | N/A       |  | DOF011    | Chinese | 48  | 40_to_50  |  | DA-AD-44  | Danish | 59  | 50_to_60  |
| AM-AD-15  | American | N/A | N/A       |  | DOF012    | Chinese | 61  | 60_above  |  | DA-AD-45  | Danish | 54  | 50_to_60  |
| AM-AD-16  | American | N/A | N/A       |  | DOF013    | Chinese | 53  | 50_to_60  |  | DA-AD-46  | Danish | 69  | 60_above  |
| AM-AD-17  | American | N/A | N/A       |  | DOF014    | Chinese | 63  | 60_above  |  | DA-AD-47  | Danish | 54  | 50_to_60  |
| AM-AD-18  | American | N/A | N/A       |  | DOM001    | Chinese | 59  | 50_to_60  |  | DA-AD-48  | Danish | 44  | 40_to_50  |
| AM-AD-19  | American | N/A | N/A       |  | DOM003    | Chinese | 53  | 50_to_60  |  | DA-AD-49  | Danish | 49  | 40_to_50  |
| AM-AD-20  | American | N/A | N/A       |  | DOM005    | Chinese | 49  | 40_to_50  |  | DA-AD-5   | Danish | 49  | 40_to_50  |
| AM-AD-21  | American | N/A | N/A       |  | DOM008    | Chinese | 75  | 60_above  |  | DA-AD-50  | Danish | 69  | 60_above  |
| AM-AD-22  | American | N/A | N/A       |  | DOM010    | Chinese | 74  | 60_above  |  | DA-AD-51  | Danish | 49  | 40_to_50  |
| AM-AD-23  | American | N/A | N/A       |  | DOM012    | Chinese | 57  | 50_to_60  |  | DA-AD-52  | Danish | 49  | 40_to_50  |
| AM-AD-24  | American | N/A | N/A       |  | DOM013    | Chinese | 36  | 30_to_40  |  | DA-AD-53  | Danish | 49  | 40_to_50  |
| AM-AD-25  | American | N/A | N/A       |  | DOM014    | Chinese | 71  | 60_above  |  | DA-AD-54  | Danish | 59  | 50_to_60  |
| AM-AD-26  | American | N/A | N/A       |  | DOM015    | Chinese | 68  | 60_above  |  | DA-AD-55  | Danish | 54  | 50_to_60  |
| AM-AD-27  | American | N/A | N/A       |  | DOM016    | Chinese | 39  | 30_to_40  |  | DA-AD-56  | Danish | 54  | 50_to_60  |
| AM-AD-28  | American | N/A | N/A       |  | DOM017    | Chinese | 41  | 40_to_50  |  | DA-AD-57  | Danish | 54  | 50_to_60  |
| AM-AD-29  | American | N/A | N/A       |  | DOM018    | Chinese | 68  | 60_above  |  | DA-AD-58  | Danish | 59  | 50_to_60  |
| AM-AD-3   | American | N/A | N/A       |  | DOM019    | Chinese | 53  | 50_to_60  |  | DA-AD-59  | Danish | 54  | 50_to_60  |
| AM-AD-30  | American | N/A | N/A       |  | DOM020    | Chinese | 43  | 40_to_50  |  | DA-AD-6   | Danish | 59  | 50_to_60  |
| AM-AD-31  | American | N/A | N/A       |  | DOM021    | Chinese | 72  | 60_above  |  | DA-AD-60  | Danish | 69  | 60_above  |
| AM-AD-32  | American | N/A | N/A       |  | DOM022    | Chinese | 31  | 30_to_40  |  | DA-AD-61  | Danish | 49  | 40_to_50  |
| AM-AD-33  | American | N/A | N/A       |  | DOM023    | Chinese | 39  | 30_to_40  |  | DA-AD-62  | Danish | 59  | 50_to_60  |
| AM-AD-34  | American | N/A | N/A       |  | DOM024    | Chinese | 42  | 40_to_50  |  | DA-AD-63  | Danish | 54  | 50_to_60  |
| AM-AD-35  | American | N/A | N/A       |  | DOM025    | Chinese | 62  | 60_above  |  | DA-AD-64  | Danish | 59  | 50_to_60  |
| AM-AD-36  | American | N/A | N/A       |  | DOM026    | Chinese | 36  | 30_to_40  |  | DA-AD-65  | Danish | 44  | 40_to_50  |
| AM-AD-37  | American | N/A | N/A       |  | NLF001    | Chinese | 31  | 30_to_40  |  | DA-AD-66  | Danish | 54  | 50_to_60  |
| AM-AD-38  | American | N/A | N/A       |  | NLF002    | Chinese | 34  | 30_to_40  |  | DA-AD-67  | Danish | 54  | 50_to_60  |
| AM-AD-39  | American | N/A | N/A       |  | NLF005    | Chinese | 44  | 40_to_50  |  | DA-AD-68  | Danish | 59  | 50_to_60  |
| AM-AD-4   | American | N/A | N/A       |  | NLF006    | Chinese | 27  | 10_to_30  |  | DA-AD-69  | Danish | 49  | 40_to_50  |
| AM-AD-40  | American | N/A | N/A       |  | NLF007    | Chinese | 39  | 30_to_40  |  | DA-AD-7   | Danish | 69  | 60_above  |
| AM-AD-41  | American | N/A | N/A       |  | NLF008    | Chinese | 26  | 10_to_30  |  | DA-AD-70  | Danish | 44  | 40_to_50  |
| AM-AD-42  | American | N/A | N/A       |  | NLF009    | Chinese | 27  | 10_to_30  |  | DA-AD-71  | Danish | 64  | 60_above  |
| AM-AD-43  | American | N/A | N/A       |  | NLF010    | Chinese | 35  | 30_to_40  |  | DA-AD-72  | Danish | 54  | 50_to_60  |

| Sample ID | Region   | Age | Age Group |  | Sample ID | Region  | Age | Age Group |  | Sample ID | Region  | Age | Age Group |
|-----------|----------|-----|-----------|--|-----------|---------|-----|-----------|--|-----------|---------|-----|-----------|
| AM-AD-44  | American | N/A | N/A       |  | NLF011    | Chinese | 25  | 10_to_30  |  | DA-AD-73  | Danish  | 49  | 40_to_50  |
| AM-AD-45  | American | N/A | N/A       |  | NLF012    | Chinese | 27  | 10_to_30  |  | DA-AD-74  | Danish  | 64  | 60_above  |
| AM-AD-46  | American | N/A | N/A       |  | NLF013    | Chinese | 32  | 30_to_40  |  | DA-AD-75  | Danish  | 69  | 60_above  |
| AM-AD-47  | American | N/A | N/A       |  | NLF014    | Chinese | 37  | 30_to_40  |  | DA-AD-76  | Danish  | 49  | 40_to_50  |
| AM-AD-48  | American | N/A | N/A       |  | NLF015    | Chinese | 59  | 50_to_60  |  | DA-AD-77  | Danish  | 49  | 40_to_50  |
| AM-AD-49  | American | N/A | N/A       |  | NLM001    | Chinese | 32  | 30_to_40  |  | DA-AD-78  | Danish  | 64  | 60_above  |
| AM-AD-5   | American | N/A | N/A       |  | NLM002    | Chinese | 23  | 10_to_30  |  | DA-AD-79  | Danish  | 59  | 50_to_60  |
| AM-AD-50  | American | N/A | N/A       |  | NLM003    | Chinese | 23  | 10_to_30  |  | DA-AD-8   | Danish  | 59  | 50_to_60  |
| AM-AD-51  | American | N/A | N/A       |  | NLM004    | Chinese | 24  | 10_to_30  |  | DA-AD-80  | Danish  | 49  | 40_to_50  |
| AM-AD-52  | American | N/A | N/A       |  | NLM005    | Chinese | 42  | 40_to_50  |  | DA-AD-81  | Danish  | 59  | 50_to_60  |
| AM-AD-53  | American | N/A | N/A       |  | NLM006    | Chinese | 24  | 10_to_30  |  | DA-AD-82  | Danish  | 54  | 50_to_60  |
| AM-AD-54  | American | N/A | N/A       |  | NLM007    | Chinese | 22  | 10_to_30  |  | DA-AD-83  | Danish  | 64  | 60_above  |
| AM-AD-55  | American | N/A | N/A       |  | NLM008    | Chinese | 22  | 10_to_30  |  | DA-AD-84  | Danish  | 59  | 50_to_60  |
| AM-AD-56  | American | N/A | N/A       |  | NLM009    | Chinese | 24  | 10_to_30  |  | DA-AD-85  | Danish  | 59  | 50_to_60  |
| AM-AD-57  | American | N/A | N/A       |  | NLM010    | Chinese | 23  | 10_to_30  |  | DA-AD-9   | Danish  | 64  | 60_above  |
| AM-AD-58  | American | N/A | N/A       |  | NLM015    | Chinese | 23  | 10_to_30  |  | ES-AD-10  | Spanish | 47  | 40_to_50  |
| AM-AD-59  | American | N/A | N/A       |  | NLM016    | Chinese | 23  | 10_to_30  |  | ES-AD-11  | Spanish | 56  | 50_to_60  |
| AM-AD-6   | American | N/A | N/A       |  | NLM017    | Chinese | 23  | 10_to_30  |  | ES-AD-12  | Spanish | 48  | 40_to_50  |
| AM-AD-60  | American | N/A | N/A       |  | NLM021    | Chinese | 25  | 10_to_30  |  | ES-AD-13  | Spanish | 42  | 40_to_50  |
| AM-AD-61  | American | N/A | N/A       |  | NLM022    | Chinese | 29  | 10_to_30  |  | ES-AD-14  | Spanish | 51  | 50_to_60  |
| AM-AD-62  | American | N/A | N/A       |  | NLM023    | Chinese | 38  | 30_to_40  |  | ES-AD-15  | Spanish | 49  | 40_to_50  |
| AM-AD-63  | American | N/A | N/A       |  | NLM024    | Chinese | 23  | 10_to_30  |  | ES-AD-16  | Spanish | 44  | 40_to_50  |
| AM-AD-64  | American | N/A | N/A       |  | NLM025    | Chinese | 19  | 10_to_30  |  | ES-AD-17  | Spanish | 44  | 40_to_50  |
| AM-AD-65  | American | N/A | N/A       |  | NLM026    | Chinese | 24  | 10_to_30  |  | ES-AD-18  | Spanish | 55  | 50_to_60  |
| AM-AD-66  | American | N/A | N/A       |  | NLM027    | Chinese | 22  | 10_to_30  |  | ES-AD-19  | Spanish | 62  | 60_above  |
| AM-AD-67  | American | N/A | N/A       |  | NLM028    | Chinese | 21  | 10_to_30  |  | ES-AD-20  | Spanish | 41  | 40_to_50  |
| AM-AD-68  | American | N/A | N/A       |  | NLM029    | Chinese | 25  | 10_to_30  |  | ES-AD-21  | Spanish | 68  | 60_above  |
| AM-AD-69  | American | N/A | N/A       |  | NLM031    | Chinese | 33  | 30_to_40  |  | ES-AD-22  | Spanish | 41  | 40_to_50  |
| AM-AD-7   | American | N/A | N/A       |  | NLM032    | Chinese | 39  | 30_to_40  |  | ES-AD-23  | Spanish | 34  | 30_to_40  |
| AM-AD-70  | American | N/A | N/A       |  | NOF001    | Chinese | 45  | 40_to_50  |  | ES-AD-24  | Spanish | 18  | 10_to_30  |
| AM-AD-71  | American | N/A | N/A       |  | NOF002    | Chinese | 51  | 50_to_60  |  | ES-AD-25  | Spanish | 46  | 40_to_50  |
| AM-AD-72  | American | N/A | N/A       |  | NOF004    | Chinese | 33  | 30_to_40  |  | ES-AD-26  | Spanish | 36  | 30_to_40  |
| AM-AD-73  | American | N/A | N/A       |  | NOF005    | Chinese | 32  | 30_to_40  |  | ES-AD-27  | Spanish | 51  | 50_to_60  |
| AM-AD-74  | American | N/A | N/A       |  | NOF006    | Chinese | 35  | 30_to_40  |  | ES-AD-28  | Spanish | 48  | 40_to_50  |
| AM-AD-75  | American | N/A | N/A       |  | NOF007    | Chinese | 32  | 30_to_40  |  | ES-AD-29  | Spanish | 45  | 40_to_50  |
| AM-AD-76  | American | N/A | N/A       |  | NOF008    | Chinese | 30  | 30_to_40  |  | ES-AD-30  | Spanish | 51  | 50_to_60  |
| AM-AD-77  | American | N/A | N/A       |  | NOF009    | Chinese | 26  | 10_to_30  |  | ES-AD-31  | Spanish | 53  | 50_to_60  |
| AM-AD-78  | American | N/A | N/A       |  | NOF010    | Chinese | 40  | 40_to_50  |  | ES-AD-32  | Spanish | 25  | 10_to_30  |
| AM-AD-79  | American | N/A | N/A       |  | NOF011    | Chinese | 30  | 30_to_40  |  | ES-AD-33  | Spanish | 41  | 40_to_50  |
| AM-AD-8   | American | N/A | N/A       |  | NOF012    | Chinese | 38  | 30_to_40  |  | ES-AD-34  | Spanish | 63  | 60_above  |
| AM-AD-80  | American | N/A | N/A       |  | NOF013    | Chinese | 41  | 40_to_50  |  | ES-AD-35  | Spanish | 37  | 30_to_40  |

| Sample ID | Region   | Age | Age Group |  | Sample ID | Region  | Age | Age Group |  | Sample ID | Region  | Age          | Age Group |
|-----------|----------|-----|-----------|--|-----------|---------|-----|-----------|--|-----------|---------|--------------|-----------|
| AM-AD-81  | American | N/A | N/A       |  | NOF014    | Chinese | 42  | 40_to_50  |  | ES-AD-36  | Spanish | 62           | 60_above  |
| AM-AD-82  | American | N/A | N/A       |  | NOM001    | Chinese | 48  | 40_to_50  |  | ES-AD-37  | Spanish | 19           | 10_to_30  |
| AM-AD-83  | American | N/A | N/A       |  | NOM002    | Chinese | 68  | 60_above  |  | ES-AD-38  | Spanish | 22           | 10_to_30  |
| AM-AD-84  | American | N/A | N/A       |  | NOM004    | Chinese | 32  | 30_to_40  |  | ES-AD-39  | Spanish | 32           | 30_to_40  |
| AM-AD-85  | American | N/A | N/A       |  | NOM005    | Chinese | 46  | 40_to_50  |  | ES-AD-5   | Spanish | 37           | 30_to_40  |
| AM-AD-86  | American | N/A | N/A       |  | NOM007    | Chinese | 72  | 60_above  |  | ES-AD-6   | Spanish | 34           | 30_to_40  |
| AM-AD-87  | American | N/A | N/A       |  | NOM008    | Chinese | 54  | 50_to_60  |  | ES-AD-7   | Spanish | 43           | 40_to_50  |
| AM-AD-88  | American | N/A | N/A       |  | NOM009    | Chinese | 33  | 30_to_40  |  | ES-AD-8   | Spanish | 68           | 60_above  |
| AM-AD-89  | American | N/A | N/A       |  | NOM010    | Chinese | 30  | 30_to_40  |  | ES-AD-9   | Spanish | 31           | 30_to_40  |
| AM-AD-9   | American | N/A | N/A       |  | NOM012    | Chinese | 32  | 30_to_40  |  | FR-AD-1   | French  | 63           | 60_above  |
| AM-AD-90  | American | N/A | N/A       |  | NOM013    | Chinese | 42  | 40_to_50  |  | FR-AD-2   | French  | 61           | 60_above  |
| AM-AD-91  | American | N/A | N/A       |  | NOM014    | Chinese | 41  | 40_to_50  |  | FR-AD-3   | French  | 60           | 60_above  |
| AM-AD-92  | American | N/A | N/A       |  | NOM015    | Chinese | 32  | 30_to_40  |  | FR-AD-4   | French  | 60           | 60_above  |
| DLF001    | Chinese  | 59  | 50_to_60  |  | NOM016    | Chinese | 37  | 30_to_40  |  | FR-AD-5   | French  | 64           | 60_above  |
| DLF002    | Chinese  | 43  | 40_to_50  |  | NOM017    | Chinese | 39  | 30_to_40  |  | FR-AD-6   | French  | 63           | 60_above  |
| DLF003    | Chinese  | 46  | 40_to_50  |  | NOM018    | Chinese | 43  | 40_to_50  |  | FR-AD-7   | French  | 62           | 60_above  |
| DLF004    | Chinese  | 25  | 10_to_30  |  | NOM019    | Chinese | 26  | 10_to_30  |  | FR-AD-8   | French  | 60           | 60_above  |
| DLF005    | Chinese  | 60  | 60_above  |  | NOM020    | Chinese | 24  | 10_to_30  |  | 1660SH    | Indian  | 3.1666666667 | 0_to_10   |
| DLF006    | Chinese  | 71  | 60_above  |  | NOM022    | Chinese | 23  | 10_to_30  |  | 1660SK    | Indian  | 4.75         | 0_to_10   |
| DLF007    | Chinese  | 62  | 60_above  |  | NOM023    | Chinese | 46  | 40_to_50  |  | 199SD     | Indian  | 4            | 0_to_10   |
| DLF008    | Chinese  | 54  | 50_to_60  |  | NOM025    | Chinese | 28  | 10_to_30  |  | 199SUBD   | Indian  | 2.5          | 0_to_10   |
| DLF009    | Chinese  | 53  | 50_to_60  |  | NOM026    | Chinese | 52  | 50_to_60  |  | 683PD     | Indian  | 4            | 0_to_10   |
| DLF010    | Chinese  | 51  | 50_to_60  |  | NOM027    | Chinese | 38  | 30_to_40  |  | 683RD     | Indian  | 3            | 0_to_10   |
| DLF012    | Chinese  | 52  | 50_to_60  |  | NOM028    | Chinese | 47  | 40_to_50  |  | 882AK     | Indian  | 3.4166666667 | 0_to_10   |
| DLF013    | Chinese  | 49  | 40_to_50  |  | NOM029    | Chinese | 14  | 10_to_30  |  | 882RK     | Indian  | 5            | 0_to_10   |
| DLF014    | Chinese  | 61  | 60_above  |  | DA-AD-10  | Danish  | 69  | 60_above  |  | 976AB     | Indian  | 2.9166666667 | 0_to_10   |
| DLM001    | Chinese  | 46  | 40_to_50  |  | DA-AD-11  | Danish  | 59  | 50_to_60  |  | 976DB     | Indian  | 1.5833333333 | 0_to_10   |
| DLM002    | Chinese  | 29  | 10_to_30  |  | DA-AD-12  | Danish  | 64  | 60_above  |  | A1        | Indian  | 4            | 0_to_10   |
| DLM003    | Chinese  | 41  | 40_to_50  |  | DA-AD-13  | Danish  | 64  | 60_above  |  | AA6       | Indian  | 2.75         | 0_to_10   |
| DLM004    | Chinese  | 38  | 30_to_40  |  | DA-AD-14  | Danish  | N/A | N/A       |  | DB2       | Indian  | 3.3333333333 | 0_to_10   |
| DLM005    | Chinese  | 35  | 30_to_40  |  | DA-AD-15  | Danish  | 54  | 50_to_60  |  | IS8       | Indian  | 2.75         | 0_to_10   |
| DLM006    | Chinese  | 28  | 10_to_30  |  | DA-AD-16  | Danish  | 59  | 50_to_60  |  | LB1       | Indian  | 5            | 0_to_10   |
| DLM007    | Chinese  | 43  | 40_to_50  |  | DA-AD-17  | Danish  | 49  | 40_to_50  |  | SAK7      | Indian  | 5            | 0_to_10   |
| DLM008    | Chinese  | 38  | 30_to_40  |  | DA-AD-18  | Danish  | 64  | 60_above  |  | SH3       | Indian  | 5            | 0_to_10   |
| DLM009    | Chinese  | 30  | 30_to_40  |  | DA-AD-19  | Danish  | 49  | 40_to_50  |  | SK5       | Indian  | 4            | 0_to_10   |
| DLM010    | Chinese  | 37  | 30_to_40  |  | DA-AD-20  | Danish  | 44  | 40_to_50  |  | SOH4      | Indian  | 3            | 0_to_10   |
| DLM011    | Chinese  | 49  | 40_to_50  |  | DA-AD-21  | Danish  | 63  | 60_above  |  | U2        | Indian  | 0.4166666667 | 0_to_10   |
| DLM012    | Chinese  | 55  | 50_to_60  |  | DA-AD-22  | Danish  | 49  | 40_to_50  |  | IT-AD-1   | Italian | 84           | 60_above  |
| DLM014    | Chinese  | 48  | 40_to_50  |  | DA-AD-23  | Danish  | 64  | 60_above  |  | IT-AD-2   | Italian | 87           | 60_above  |
| DLM015    | Chinese  | 56  | 50_to_60  |  | DA-AD-24  | Danish  | 69  | 60_above  |  | IT-AD-3   | Italian | 77           | 60_above  |
| DLM016    | Chinese  | 70  | 60_above  |  | DA-AD-25  | Danish  | 59  | 50_to_60  |  | IT-AD-4   | Italian | 80           | 60_above  |

| Sample ID | Region  | Age | Age Group |  | Sample ID | Region | Age | Age Group |  | Sample ID | Region   | Age | Age Group |
|-----------|---------|-----|-----------|--|-----------|--------|-----|-----------|--|-----------|----------|-----|-----------|
| DLM017    | Chinese | 52  | 50_to_60  |  | DA-AD-26  | Danish | 49  | 40_to_50  |  | IT-AD-5   | Italian  | 70  | 60_above  |
| DLM018    | Chinese | 49  | 40_to_50  |  | DA-AD-27  | Danish | 49  | 40_to_50  |  | IT-AD-6   | Italian  | 72  | 60_above  |
| DLM019    | Chinese | 47  | 40_to_50  |  | DA-AD-28  | Danish | 59  | 50_to_60  |  | JP-AD-1   | Japanese | 30  | 30_to_40  |
| DLM020    | Chinese | 41  | 40_to_50  |  | DA-AD-29  | Danish | 44  | 40_to_50  |  | JP-AD-2   | Japanese | 28  | 10_to_30  |
| DLM021    | Chinese | 58  | 50_to_60  |  | DA-AD-30  | Danish | 69  | 60_above  |  | JP-AD-3   | Japanese | 37  | 30_to_40  |
| DLM022    | Chinese | 53  | 50_to_60  |  | DA-AD-31  | Danish | 69  | 60_above  |  | JP-AD-4   | Japanese | 36  | 30_to_40  |
| DLM023    | Chinese | 45  | 40_to_50  |  | DA-AD-32  | Danish | 59  | 50_to_60  |  | JP-AD-7   | Japanese | 45  | 40_to_50  |
| DLM024    | Chinese | 39  | 30_to_40  |  | DA-AD-33  | Danish | 54  | 50_to_60  |  | JP-AD-8   | Japanese | 35  | 30_to_40  |
| DLM027    | Chinese | 70  | 60_above  |  | DA-AD-34  | Danish | 49  | 40_to_50  |  | JP-AD-9   | Japanese | 24  | 10_to_30  |
| DLM028    | Chinese | 63  | 60_above  |  | DA-AD-35  | Danish | 64  | 60_above  |  | JP-CH-1   | Japanese | 3   | 0_to_10   |
| DOF002    | Chinese | 56  | 50_to_60  |  | DA-AD-36  | Danish | 44  | 40_to_50  |  | JP-CH-2   | Japanese | 1.5 | 0_to_10   |
| DOF003    | Chinese | 59  | 50_to_60  |  | DA-AD-37  | Danish | 54  | 50_to_60  |  | JP-IN-1   | Japanese | 0.6 | 0_to_10   |
| DOF004    | Chinese | 63  | 60_above  |  | DA-AD-38  | Danish | 58  | 50_to_60  |  | JP-IN-2   | Japanese | 0.5 | 0_to_10   |
| DOF006    | Chinese | 51  | 50_to_60  |  | DA-AD-39  | Danish | 67  | 60_above  |  | JP-IN-3   | Japanese | 0.3 | 0_to_10   |
|           |         |     |           |  |           |        |     |           |  | JP-IN-4   | Japanese | 0.3 | 0_to_10   |
