# Supplementary material for: Xenobiotic Metabolism and Gut Microbiomes
Source: PLoS One. 2016 Oct 3;11(10):e0163099. doi: 10.1371/journal.pone.0163099 (PMC5047465; doi:10.1371/journal.pone.0163099)
Supplement: S7 Table — (XLSX) [file pone.0163099.s026.xlsx]

## Sheet: 1_clust_num_cogs_all
Enzyme	Cluster	COGs_Abundance	COGS
1.1.1.-	1	38	COG0723|COG0667|COG0665|COG0300|COG0246|COG1028|NOG149329|COG0604|COG1979|COG4221|COG1064|COG1063|COG2085|COG2055|COG3347|COG2133|COG0531|NOG87976|NOG253792|COG1250|COG0677|COG3293|COG0673|NOG05124|COG0596|COG0702|COG2072|COG2141|COG1748|COG0656|COG0654|NOG319871|bactNOG04650|COG4097|NOG315607|COG1453|COG1454|NOG76671
1.1.1.1	1	11	COG4932|COG1012|NOG12793|COG0604|COG1979|NOG14182|COG1064|COG1063|COG1062|COG1454|NOG135566
1.6.5.-	1	14	COG0543|COG1805|COG4656|COG2871|COG3239|COG1347|COG4659|COG4658|NOG127603|COG2209|COG4097|COG0369|COG1726|COG2869
2.5.1.-	1	15	NOG137692|NOG239311|NOG73478|NOG319308|NOG137300|COG1575|NOG146809|COG0109|COG0382|COG1562|COG0142|NOG113180|COG1830|COG1612|COG1154
2.6.1.-	1	7	COG4992|COG1168|NOG138815|COG0147|COG0160|COG0399|COG0436
3.1.1.2	1	4	COG0596|bactNOG32053|COG2755|NOG237837
4.2.1.-	1	29	COG0666|NOG71451|COG1024|proNOG51872|NOG275122|COG1086|NOG08290|COG3971|bactNOG101256|NOG253421|NOG127783|COG2368|NOG320859|NOG126076|COG1775|COG1830|NOG129515|NOG140498|COG0399|bactNOG96806|COG0833|COG0179|COG0764|NOG86506|COG0585|NOG131587|NOG147824|COG0365|NOG39571
K00100	1	33	COG0667|COG0300|COG1028|COG0451|COG0604|COG1979|COG4221|COG2084|COG2461|COG0644|COG1062|COG0431|COG0492|COG2133|COG1063|NOG149923|COG0723|COG0677|COG1052|COG0673|COG1064|NOG05124|COG0277|COG0702|COG0111|COG0039|COG2072|COG1748|COG3749|COG0656|COG4989|NOG250652|COG1454
K00599	1	66	COG5598|NOG71304|NOG256846|NOG116918|NOG80259|COG1846|COG0789|NOG259683|COG0144|COG2226|COG0827|NOG328931|COG0620|COG3695|COG0030|NOG15006|NOG27370|COG3510|COG2265|NOG330932|COG0863|COG4121|NOG277992|COG4123|COG4122|NOG131816|NOG311802|bactNOG75764|COG0219|NOG294427|NOG291748|NOG266996|NOG70397|COG1032|NOG139654|COG0565|NOG137752|COG0566|NOG301566|COG2933|COG2189|NOG262454|COG2230|COG2890|COG3963…
K00680	1	56	NOG79647|COG0477|COG0454|COG0456|NOG139473|COG0304|NOG124398|NOG41966|proNOG30536|NOG114410|COG3240|COG3243|NOG128609|NOG84104|COG4261|NOG312623|COG1670|NOG276023|bactNOG44459|NOG243550|NOG87366|NOG118967|NOG26074|COG3153|COG3173|COG3594|NOG113551|COG2388|COG1560|NOG39689|COG0627|NOG38778|NOG47648|COG1835|NOG15289|NOG124476|NOG280060|bactNOG79474|COG1357|NOG80489|NOG84508|NOG14356|COG0110|NOG2378…
1.1.1.157	2	3	COG1250|bactNOG87590|NOG132834
1.1.1.35	2	8	COG1250|NOG75207|COG1024|COG0739|NOG128059|COG1028|COG0824|COG3617
1.12.99.6	2	3	COG3259|COG0374|COG1740
1.13.11.-	2	2	COG3568|NOG08474
1.14.12.10	2	4	COG5517|COG0583|COG4638|NOG86206
1.14.12.18	2	4	COG5517|COG4638|COG0329|NOG147202
1.14.13.-	2	16	COG1018|COG2072|NOG126253|bactNOG37124|NOG299724|COG2124|COG2091|COG1853|COG1565|COG2141|NOG293287|NOG139994|firmNOG04169|COG2941|COG4638|COG0654
1.14.13.8	2	1	COG2072
1.14.13.82	2	1	COG4638
1.2.1.-	2	2	COG1012|COG0002
1.3.1.-	2	6	NOG115973|COG1028|bactNOG08128|NOG81420|NOG311127|COG0287
1.3.1.2	2	2	bactNOG06175|COG0167
1.3.1.25	2	3	COG0543|COG1028|COG2186
1.3.99.-	2	4	COG1960|COG3173|NOG148174|NOG258291
1.8.99.3	2	2	NOG273473|COG2920
2.3.1.16	2	6	NOG273902|NOG286998|COG0183|bactNOG51892|NOG74549|NOG266865
2.3.1.5	2	1	COG2162
2.3.1.9	2	2	COG0183|NOG12793
2.5.1.18	2	16	COG3832|NOG237237|NOG122057|NOG307815|NOG236793|COG2764|NOG266414|NOG113430|NOG328612|NOG271594|NOG282939|COG0435|COG0625|COG3502|COG3455|NOG120502
2.8.3.-	2	6	COG2057|COG1804|COG4670|NOG259748|COG1788|COG0427
2.8.3.1	2	1	COG4670
2.8.3.12	2	2	COG2057|COG1788
2.8.3.6	2	3	COG2057|COG0015|COG1788
3.1.1.17	2	4	COG1335|NOG311610|NOG12793|COG3386
3.1.1.45	2	2	NOG114709|COG0412
3.1.2.-	2	4	COG1607|COG2755|COG1946|COG2911
3.1.3.41	2	1	COG0647
3.3.2.9	2	9	NOG256056|COG0596|NOG236979|NOG238837|COG3310|bactNOG00422|bactNOG06310|NOG242083|bactNOG02461
3.5.1.5	2	3	COG0832|COG0831|COG0804
3.5.1.6	2	2	COG3195|COG0624
3.5.2.-	2	1	NOG42200
3.5.2.2	2	1	COG0044
3.5.5.1	2	1	COG0388
3.7.1.-	2	15	NOG289615|NOG312253|NOG248694|NOG256056|COG0791|NOG73981|NOG115793|COG0596|NOG299903|COG1012|proNOG10575|NOG242433|NOG268481|COG3962|NOG290085
3.8.1.5	2	11	NOG259620|COG0596|NOG264302|NOG256056|NOG321283|NOG299903|NOG137987|NOG290739|NOG294146|NOG325175|NOG269646
4.1.3.39	2	2	COG0119|NOG284451
4.1.99.-	2	2	NOG28944|COG1533
4.2.1.80	2	4	NOG147824|NOG71451|COG3971|COG0179
4.2.1.83	2	2	NOG86120|COG2159
4.2.1.84	2	4	NOG243537|NOG10225|NOG10922|NOG82791
5.4.99.-	2	4	COG0564|COG1657|NOG125598|COG1187
K00002	2	4	COG1064|COG1063|COG0656|COG0673
K00055	2	1	COG1062
K00128	2	1	COG1012
K00132	2	1	COG1012
K00155	2	5	COG1012|NOG258356|COG1028|COG1063|COG0057
K00169	2	1	COG0674
K00224	2	3	COG1028|COG0635|COG1902
K00446	2	2	COG0346|NOG127259
K00462	2	1	COG0346
K00539	2	1	COG1180
K00632	2	2	COG0183|NOG266865
K00799	2	25	NOG05174|NOG295331|NOG274306|NOG137937|NOG148748|COG0435|COG0625|NOG147832|NOG328612|COG3795|cyaNOG03537|NOG243958|NOG237237|NOG274516|NOG271594|NOG319342|NOG245192|NOG122057|NOG279215|NOG304864|COG4116|NOG77136|COG0346|COG3502|bactNOG03525
K01026	2	1	COG4670
K01034	2	1	COG1788
K01039	2	1	COG1788
K01061	2	2	NOG132378|COG0412
K01075	2	5	COG1607|NOG47542|COG0824|NOG235997|NOG290297
K01426	2	4	COG0154|COG0388|COG0410|COG2421
K01428	2	1	COG0804
K01464	2	2	COG0044|COG0145
K01500	2	4	COG0402|COG0590|COG2131|COG0295
K01501	2	1	COG0388
K01561	2	3	COG0596|COG1011|NOG242083
K01564	2	2	COG1011|COG0402
K01692	2	4	NOG275102|NOG274875|COG0447|COG1024
K01781	2	1	COG4948
K01821	2	23	NOG326695|NOG282890|NOG86590|NOG137916|NOG295137|NOG44480|NOG26580|NOG313178|NOG324677|NOG289103|NOG305243|NOG73574|bactNOG84032|arCOG02240|bactNOG99310|bactNOG49711|NOG68920|NOG289493|NOG41112|NOG118638|COG1942|proNOG40623|NOG298815
K01857	2	1	COG0015
K01913	2	4	COG1022|NOG42171|COG1042|COG0318
K02554	2	2	COG0833|COG3971
K03382	2	1	COG0402
K05394	2	1	COG0402
K05783	2	1	COG1028
K06281	2	1	COG0374
K08710	2	1	COG0402
K09461	2	1	COG1902
K10218	2	1	COG0684
K13953	2	3	COG1064|COG1063|COG1062
K14333	2	1	COG2159
K15054	2	1	COG1304
K16173	2	1	COG1960
K16514	2	1	COG2828
1.1.1.205	3	18	COG3706|COG3829|NOG29031|NOG312742|COG2199|NOG120144|COG3448|COG1993|NOG130622|NOG126670|NOG240127|NOG150502|COG0516|COG0517|NOG329179|COG2172|COG2954|bactNOG41440
1.2.7.1	3	6	COG0674|COG1013|COG1014|COG1148|COG0437|COG1144
1.7.1.-	3	2	NOG44786|COG0780
2.4.2.10	3	3	COG0461|NOG274888|COG0284
2.4.2.8	3	5	NOG272266|NOG286574|COG0037|COG0634|COG2236
2.7.1.48	3	11	NOG304750|NOG131697|NOG41399|NOG147798|COG0572|cyaNOG08667|COG0441|NOG130258|NOG259402|bactNOG68706|NOG138491
2.7.4.-	3	1	COG0528
3.1.3.1	3	28	COG4935|NOG45582|COG0737|bactNOG01096|NOG46526|COG4222|COG1652|COG4247|NOG45377|NOG05087|NOG287201|NOG28258|COG1524|COG1785|COG1409|NOG139033|COG2931|NOG67541|COG2374|bactNOG49420|NOG241938|COG0586|COG3540|NOG12793|COG3211|COG5276|NOG262791|cyaNOG02309
3.5.1.-	3	15	NOG05353|NOG242870|COG0726|COG0739|NOG81316|COG2366|COG0154|COG1414|COG1473|COG0774|COG1215|COG0624|COG0764|COG1724|COG2204
3.5.4.-	3	4	COG0596|COG0590|COG3070|COG0117
3.5.4.5	3	4	NOG133791|NOG81164|COG0295|COG0834
4.1.1.-	3	12	bactNOG04869|NOG277216|COG0451|COG3479|COG0019|NOG145097|COG0043|COG0076|COG0163|COG3961|COG0223|NOG09631
4.1.1.44	3	13	NOG265253|COG0596|COG0477|COG1917|NOG80392|bactNOG42339|COG0599|NOG290561|NOG06443|NOG323813|NOG238668|NOG264324|NOG83192
4.1.3.-	3	5	COG0147|COG0119|COG2301|COG0107|COG2089
6.3.5.2	3	6	COG2071|NOG286401|COG0518|COG0519|COG1606|COG1670
K00088	3	4	COG0516|COG0517|COG1475|COG1253
K00757	3	1	COG2820
K00760	3	2	NOG272266|COG0634
K00857	3	3	NOG294626|COG1435|bactNOG10638
K00876	3	17	NOG304750|NOG114344|COG0494|NOG147798|COG0572|bactNOG68706|COG0441|NOG138491|NOG76296|bactNOG17944|NOG130258|cyaNOG08495|bactNOG06712|NOG259402|NOG131697|bactNOG78696|actNOG11653
K01489	3	9	NOG120614|COG0590|COG2131|NOG133791|actNOG20717|COG0834|NOG137974|COG0295|COG0319
K01607	3	7	NOG73123|NOG120715|NOG80392|COG0599|COG2128|NOG290561|NOG70285
K01951	3	4	NOG286401|COG0121|COG0518|COG0519
1.2.1.10	4	3	COG1012|COG4569|COG1454
1.2.1.3	4	10	bactNOG31868|NOG82924|NOG124484|NOG82889|COG1012|COG4230|NOG68057|COG2030|NOG293868|COG0223
1.2.99.2	4	10	COG2080|COG1142|NOG115480|COG1319|COG1529|COG3427|COG0437|COG1152|COG1151|COG1880
2.4.2.3	4	4	COG2820|firmNOG08411|NOG09378|COG0813
2.4.2.4	4	7	NOG117057|NOG125357|NOG04046|NOG118151|COG0213|NOG305772|NOG04114
2.7.1.21	4	3	NOG294626|COG1435|bactNOG10638
2.8.3.8	4	3	COG2057|COG4670|COG1788
3.1.1.-	4	24	NOG331730|NOG122423|NOG86837|COG0241|NOG278401|COG2220|COG1208|COG0627|COG0596|COG3386|NOG87362|COG4188|NOG243765|COG2382|COG0279|COG0463|COG2936|COG0657|COG0859|NOG256056|COG2272|COG4553|COG3509|COG3621
3.1.1.1	4	8	COG0596|COG0400|COG2272|COG1647|COG3240|COG0657|COG2755|NOG46685
3.1.1.24	4	27	NOG303095|NOG86837|NOG259226|NOG112900|NOG287286|NOG289615|COG0596|NOG140753|NOG261985|NOG264369|COG2267|COG0599|NOG81296|NOG329400|NOG310765|COG4313|NOG305655|NOG297937|NOG244755|NOG148086|NOG256056|NOG243638|NOG291751|NOG242083|NOG251417|NOG316574|NOG74005
3.1.2.23	4	1	COG0824
3.1.3.2	4	20	COG1409|NOG237269|NOG75882|COG0671|NOG274254|COG2503|proNOG19527|bactNOG33522|COG3700|NOG41277|NOG85977|NOG314912|NOG28269|NOG11964|NOG243606|bactNOG41257|bactNOG25317|NOG80098|bactNOG24658|NOG239561
3.2.1.31	4	1	COG3250
3.5.1.4	4	4	COG0154|COG0388|proNOG42235|COG2421
3.5.1.54	4	6	COG1984|COG2049|COG0154|NOG253078|NOG81861|NOG123043
3.6.1.7	4	11	NOG122495|NOG249917|COG1254|NOG290655|proNOG60178|NOG267544|NOG319439|bactNOG99502|proNOG33544|NOG148884|NOG117913
3.7.1.2	4	3	COG0491|COG0346|COG0179
3.8.1.2	4	5	NOG67879|COG1011|NOG258405|NOG127891|NOG329550
4.1.2.-	4	6	COG3836|NOG278332|COG0191|COG1511|NOG246650|NOG85321
4.2.1.17	4	17	COG1250|NOG12793|NOG78563|NOG274875|COG3617|COG1024|COG0739|COG3173|NOG135296|NOG248067|COG0447|COG0183|NOG299707|COG2030|NOG275102|NOG320859|NOG75207
5.3.99.-	4	3	NOG254795|COG4130|COG1082
5.5.1.1	4	2	COG4948|COG0583
K00074	4	1	COG1250
K00626	4	3	COG0183|NOG286998|bactNOG10903
K00758	4	1	COG0213
K01041	4	5	COG2057|COG1804|COG1788|COG0427|COG4670
K01066	4	24	COG0123|NOG255600|NOG297846|COG0627|COG0412|COG0596|COG2072|COG4188|COG2267|COG3675|COG2382|actNOG13335|NOG43624|COG2312|NOG245905|COG1075|COG3760|COG0657|NOG130539|COG2272|COG4553|COG3509|NOG41498|NOG43172
K01077	4	7	COG1409|COG0586|COG3540|NOG05087|COG2931|NOG315610|COG1785
K01101	4	1	COG0647
K01195	4	1	COG3250
K01512	4	12	NOG122495|NOG249917|COG1254|NOG290655|proNOG60178|NOG267544|NOG319439|bactNOG99502|proNOG33544|NOG148884|bactNOG43829|NOG117913
K01560	4	3	NOG70608|COG1011|NOG258405
K01666	4	2	COG0119|NOG284451
K01726	4	16	COG0179|COG4948|NOG129515|COG5361|COG1024|COG4706|COG0399|NOG114112|COG1028|COG1775|COG1086|COG2030|COG3971|COG3970|NOG08314|COG0764
K03518	4	2	COG2080|COG3427
K06446	4	1	COG1960
K07536	4	1	COG0447
